# Supplementary material for: Identification of Novel Genes Selectively Expressed in the Follicle-Associated Epithelium from the Meta-Analysis of Transcriptomics Data from Multiple Mouse Cell and Tissue Populations
Source: PubMed Central journal article supplement — DNA Res. 2012 Sep 18;19(5):407–22. doi: 10.1093/dnares/dss022 (PMC3473373; doi:10.1093/dnares/dss022), 2012-09-18
Supplement: supp_dss022_dss022supp_fig1.pdf [file supp_dss022_dss022supp_fig1.pdf]

Cluster001\_Astrocyte-related (561 nodes)

2,087.2  
1,977.4  
1,867.5  
1,757.7  
1,647.8  
1,538  
1,428.1  
1,318.2  
1,208.4  
1,098.5  
988.7  
878.8  
769  
659.1  
549.3  
439.4  
329.6  
219.7  
109.9  
0

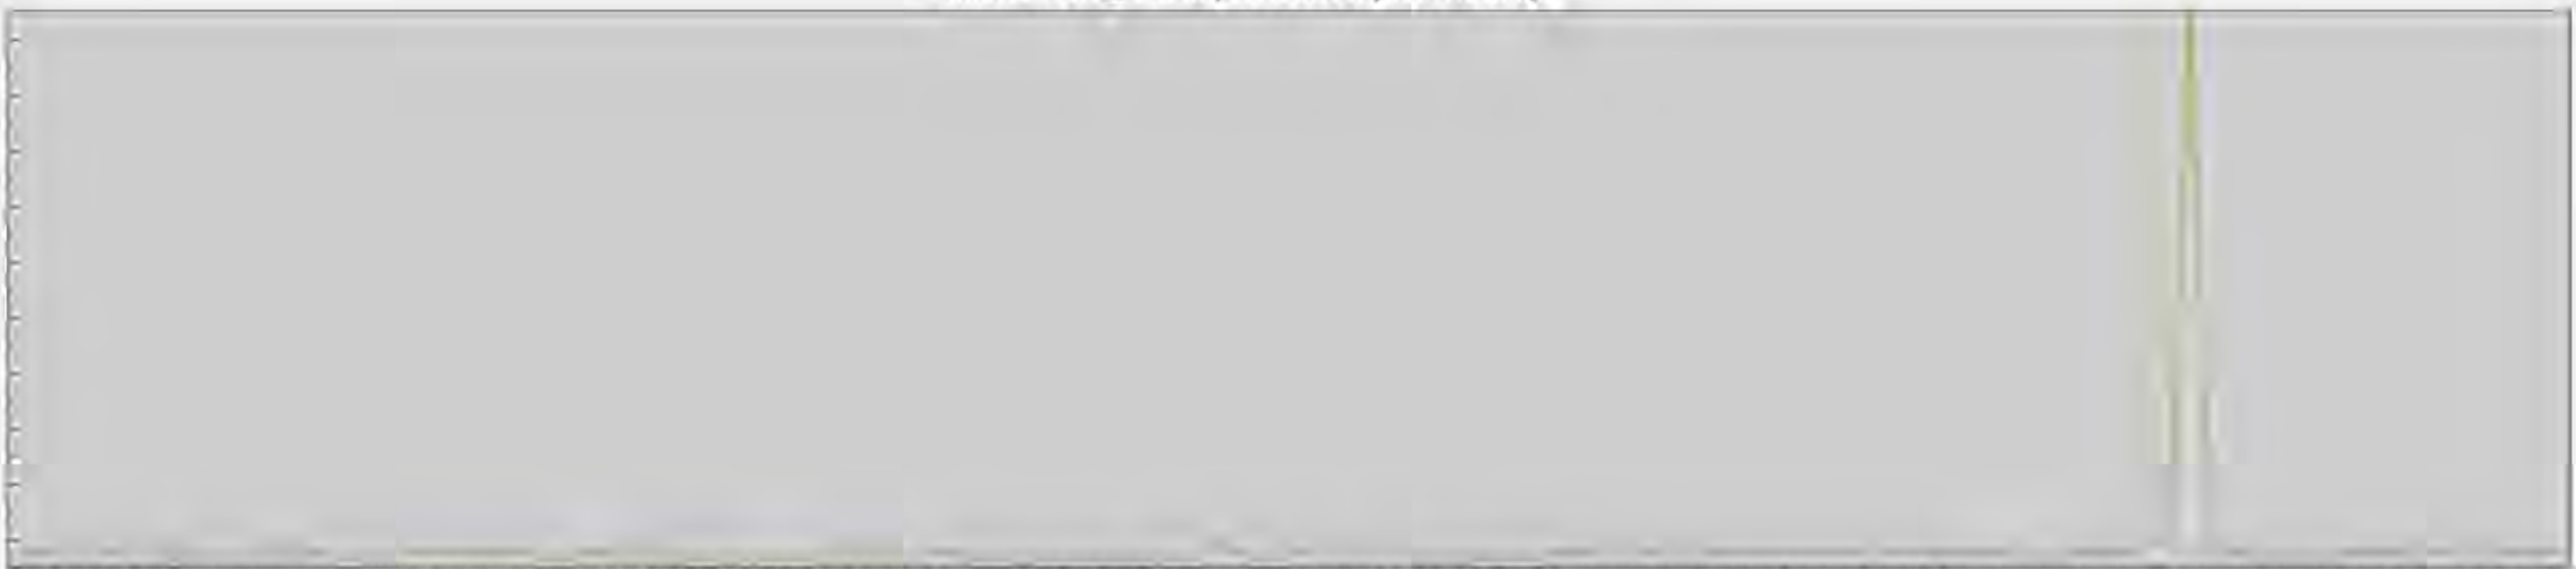

30-NALT GSM289411 CELL  
 129-NALT GSM289410 CELL  
 128-NALT GSM289409 CELL  
 127-NALT GSM289408 CELL  
 126-Color-d9 GSM1988105 CELL  
 125-Color-d9 GSM1988104 CELL  
 124-Color-d9 GSM1988103 CELL  
 123-Color-d4 GSM1988102 CELL  
 122-Color-d4 GSM1988101 CELL  
 121-Intestine-large GSM258676 CELL  
 120-Intestine-large GSM258675 CELL  
 119-Intestine-small GSM258674 CELL  
 118-Intestine-small GSM258673 CELL  
 117-Lymph-nodes GSM258672 CELL  
 116-Spleen GSM258671 CELL  
 115-Spleen GSM258670 CELL  
 114-Spleen GSM258669 CELL  
 113-Neuro2a GSM241898 CELL  
 112-Neuro2a GSM241897 CELL  
 111-Astrocytes GSM241896 CELL  
 110-mimb GSM258726 CELL  
 109-mimb GSM258725 CELL  
 108-MIMCD3 GSM258724 CELL  
 107-MIMCD3 GSM258723 CELL  
 106-Bruce4 GSM258665 CELL  
 105-Bruce4 GSM258664 CELL  
 104-C2C12 GSM258663 CELL  
 103-C2C12 GSM258662 CELL  
 102-NH3T3 GSM258730 CELL  
 101-NH3T3 GSM258729 CELL  
 100-3T3-L1 GSM258610 CELL  
 99-3T3-L1 GSM258609 CELL  
 98-10T12 GSM258632 CELL  
 97-10T12 GSM258631 CELL  
 96-Osteoblast-d21 GSM258740 CELL  
 95-Osteoblast-d21 GSM258739 CELL  
 94-Osteoblast-d14 GSM258738 CELL  
 93-Osteoblast-d14 GSM258737 CELL  
 92-Osteoblast-d5 GSM258742 CELL  
 91-Osteoblast-d5 GSM258741 CELL  
 90-Chondrocytes GSM266741 CELL  
 89-Chondrocytes GSM266740 CELL  
 88-Nat Helper cell GSM465594 CELL  
 87-Nat Helper cell GSM465593 CELL  
 86-T cell GSM465596 CELL  
 85-MS-1 GSM234692 CELL  
 84-Lymph-endo-cells GSM143704 CELL  
 83-P-FDC GSM481977 CELL  
 82-P-FDC GSM481978 CELL  
 81-P-FDC GSM481976 CELL  
 80-L-Y-RMLND C003001 CELL  
 79-L-Y-RMLND C003001 CELL  
 78-Follicular-Bcells GSM258664 CELL  
 77-Follicular-Bcells GSM258663 CELL  
 76-MZ-Bcell GSM258627 CELL  
 75-MZ-Bcell GSM258627 CELL  
 74-BAF3 GSM258620 CELL  
 73-BAF3 GSM258619 CELL  
 72-Tregs GSM258778 CELL  
 71-Tregs GSM258777 CELL  
 70-T-cells-CD8+ GSM258776 CELL  
 69-T-cells-CD8+ GSM258774 CELL  
 68-T-cells-CD4+ GSM258773 CELL  
 67-T-cells-CD4+ GSM258744 CELL  
 66-Thymocyte-DN GSM465595 CELL  
 65-Osteoclasts GSM258743 CELL  
 64-Osteoclasts GSM258743 CELL  
 63-Microglia GSM258721 CELL  
 62-Microglia GSM258721 CELL  
 61-MM-LPS-7h GSM258705 CELL  
 60-MM-LPS-7h GSM258705 CELL  
 59-MM-LPS-6h GSM258702 CELL  
 58-MM-LPS-6h GSM258702 CELL  
 57-MM-LPS-6h GSM258699 CELL  
 56-MM-LPS-6h GSM258699 CELL  
 55-MM-LPS-6h GSM258694 CELL  
 54-MM-LPS-6h GSM258694 CELL  
 53-Ismacryoid-DC GSM258650 CELL  
 52-Ismacryoid-DC GSM258649 CELL  
 51-CD8a-DC GSM258648 CELL  
 50-CD8a-DC GSM258647 CELL  
 49-CD8a+DC GSM258646 CELL  
 48-CD8a+DC GSM258646 CELL  
 47-NK-cells GSM258732 CELL  
 46-NK-cells GSM258731 CELL  
 45-Mast-cells-IgE+Ad GSM258718 CELL  
 44-Mast-cells-IgE+Ad GSM258717 CELL  
 43-Mast-cells-IgE GSM258714 CELL  
 42-Mast-cells-IgE GSM258713 CELL  
 41-Mast-cells GSM258712 CELL  
 40-Granulocytes GSM258712 CELL  
 39-Granulocytes GSM258667 CELL  
 38-Granulocytes GSM258667 CELL  
 37-GMP GSM258666 CELL  
 36-GMP GSM258665 CELL  
 35-GMP GSM258664 CELL  
 34-MEMP GSM258872 CELL  
 33-MEMP GSM258872 CELL  
 32-MEMP GSM258872 CELL  
 31-HESC GSM258770 CELL  
 30-HESC GSM258770 CELL  
 29-Bone marrow GSM258628 CELL  
 28-Bone marrow GSM258627 CELL  
 27-paneth-cells-GE GSM116358 CELL  
 26-paneth-cells-GE GSM116357 CELL  
 25-paneth-cells GSM116350 CELL  
 24-paneth-cells GSM116359 CELL  
 23-paneth-cells GSM318589 CELL  
 22-paneth-cells GSM318590 CELL  
 21-paneth-cells GSM318590 CELL  
 20-Colon-Crypt GSM480375 cel  
 19-Colon-Vill GSM480363 cel  
 18-Colon-Vill GSM480362 cel  
 17-Colon-IEC-Gf GSM349880 CELL  
 16-Colon-IEC-Gf GSM350375 CELL  
 15-Ileum-IEC-Gf GSM350376 CELL  
 14-Ileum-IEC GSM350371 CELL  
 13-Small-intestine-epithelium RMINEP002001 CELL  
 12-Small-intestine-epithelium RMINEP001001 CELL  
 11-FAE RMPYEP001001 CELL  
 10-FAE RMPYEP001001 CELL  
 09-Ileum-IEC GSM190797 CELL  
 08-Ileum-IEC GSM190796 CELL  
 07-Ileum-IEC GSM190795 CELL  
 06-CT-w-M-cells GSM190794 CELL  
 05-CT-w-M-cells GSM190793 CELL  
 04-CT-y-M-cells GSM190792 CELL  
 03-PP-M-cells GSM190791 CELL  
 02-PP-M-cells GSM190790 CELL  
 01-PP-M-cells GSM190789 CELL







Cluster0003\_Paneth cell-related (472 nodes)

282.5  
267.7  
252.8  
237.9  
223  
208.2  
193.3  
178.4  
163.6  
148.7  
133.8  
119  
104.1  
89.2  
74.3  
59.5  
44.6  
29.7  
14.9  
0

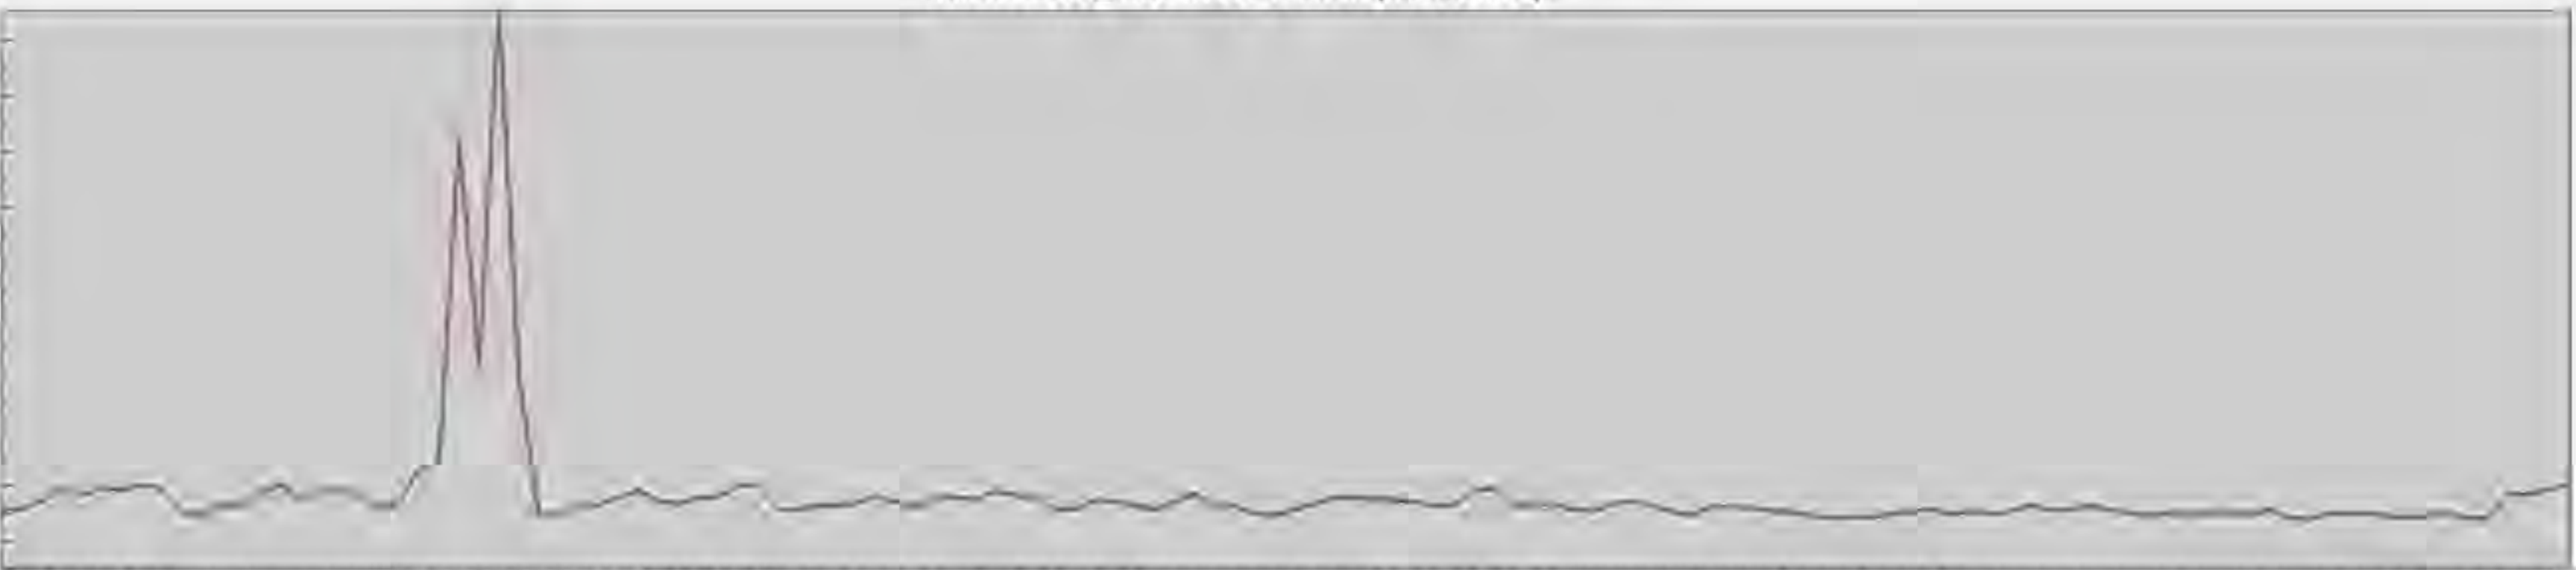

|                     |            |      |
|---------------------|------------|------|
| 30-NALT             | GSM289411  | CELL |
| 139-NALT            | GSM289410  | CELL |
| 138-NALT            | GSM289409  | CELL |
| 137-NALT            | GSM289408  | CELL |
| 136-Color-d9        | GSM1988104 | CELL |
| 135-Color-d9        | GSM1988103 | CELL |
| 134-Color-d4        | GSM1988102 | CELL |
| 133-Color-d4        | GSM1988101 | CELL |
| 132-Intestine-large | GSM258676  | CELL |
| 131-Intestine-large | GSM258675  | CELL |
| 130-Intestine-large | GSM258674  | CELL |
| 129-Intestine-small | GSM258673  | CELL |
| 128-Intestine-small | GSM258672  | CELL |
| 127-Lymph-nodes     | GSM258671  | CELL |
| 126-Spleen          | GSM258670  | CELL |
| 125-Spleen          | GSM258669  | CELL |
| 124-Neuro2a         | GSM241898  | CELL |
| 123-Neuro2a         | GSM241897  | CELL |
| 122-Astrocytes      | GSM241896  | CELL |
| 121-mimb            | GSM258726  | CELL |
| 120-mimb            | GSM258725  | CELL |
| 119-mimb            | GSM258724  | CELL |
| 118-MIMCD3          | GSM258723  | CELL |
| 117-MIMCD3          | GSM258722  | CELL |
| 116-Bruce4          | GSM258690  | CELL |
| 115-Bruce4          | GSM258689  | CELL |
| 114-C2C12           | GSM258688  | CELL |
| 113-C2C12           | GSM258687  | CELL |
| 112-NH3T3           | GSM258730  | CELL |
| 111-NH3T3           | GSM258729  | CELL |
| 110-3T3-L1          | GSM258610  | CELL |
| 109-3T3-L1          | GSM258609  | CELL |
| 108-10T12           | GSM258632  | CELL |
| 107-10T12           | GSM258631  | CELL |
| 106-Osteoblast-d21  | GSM258740  | CELL |
| 105-Osteoblast-d21  | GSM258739  | CELL |
| 104-Osteoblast-d14  | GSM258738  | CELL |
| 103-Osteoblast-d14  | GSM258737  | CELL |
| 102-Osteoblast-d5   | GSM258742  | CELL |
| 101-Osteoblast-d5   | GSM258741  | CELL |
| 100-Chondrocytes    | GSM266741  | CELL |
| 99-Chondrocytes     | GSM266740  | CELL |
| 98-Nat Helper cell  | GSM465594  | CELL |
| 97-Nat Helper cell  | GSM465593  | CELL |
| 96-LT cell          | GSM465596  | CELL |
| 95-MS-1             | GSM234692  | CELL |
| 94-Lymph-endo-cells | GSM143704  | CELL |
| 93-Lymph-endo-cells | GSM481977  | CELL |
| 92-Lymph-endo-cells | GSM481978  | CELL |
| 91-Lymph-endo-cells | GSM481979  | CELL |
| 90-Lymph-endo-cells | GSM481976  | CELL |
| 89-Lymph-endo-cells | GSM481977  | CELL |
| 88-Lymph-endo-cells | GSM481978  | CELL |
| 87-Lymph-endo-cells | GSM481979  | CELL |
| 86-Lymph-endo-cells | GSM481976  | CELL |
| 85-Lymph-endo-cells | GSM481977  | CELL |
| 84-Lymph-endo-cells | GSM481978  | CELL |
| 83-Lymph-endo-cells | GSM481979  | CELL |
| 82-Lymph-endo-cells | GSM481976  | CELL |
| 81-Lymph-endo-cells | GSM481977  | CELL |
| 80-Lymph-endo-cells | GSM481978  | CELL |
| 79-Lymph-endo-cells | GSM481979  | CELL |
| 78-Lymph-endo-cells | GSM481976  | CELL |
| 77-Lymph-endo-cells | GSM481977  | CELL |
| 76-Lymph-endo-cells | GSM481978  | CELL |
| 75-Lymph-endo-cells | GSM481979  | CELL |
| 74-Lymph-endo-cells | GSM481976  | CELL |
| 73-Lymph-endo-cells | GSM481977  | CELL |
| 72-Lymph-endo-cells | GSM481978  | CELL |
| 71-Lymph-endo-cells | GSM481979  | CELL |
| 70-Lymph-endo-cells | GSM481976  | CELL |
| 69-Lymph-endo-cells | GSM481977  | CELL |
| 68-Lymph-endo-cells | GSM481978  | CELL |
| 67-Lymph-endo-cells | GSM481979  | CELL |
| 66-Lymph-endo-cells | GSM481976  | CELL |
| 65-Lymph-endo-cells | GSM481977  | CELL |
| 64-Lymph-endo-cells | GSM481978  | CELL |
| 63-Lymph-endo-cells | GSM481979  | CELL |
| 62-Lymph-endo-cells | GSM481976  | CELL |
| 61-Lymph-endo-cells | GSM481977  | CELL |
| 60-Lymph-endo-cells | GSM481978  | CELL |
| 59-Lymph-endo-cells | GSM481979  | CELL |
| 58-Lymph-endo-cells | GSM481976  | CELL |
| 57-Lymph-endo-cells | GSM481977  | CELL |
| 56-Lymph-endo-cells | GSM481978  | CELL |
| 55-Lymph-endo-cells | GSM481979  | CELL |
| 54-Lymph-endo-cells | GSM481976  | CELL |
| 53-Lymph-endo-cells | GSM481977  | CELL |
| 52-Lymph-endo-cells | GSM481978  | CELL |
| 51-Lymph-endo-cells | GSM481979  | CELL |
| 50-Lymph-endo-cells | GSM481976  | CELL |
| 49-Lymph-endo-cells | GSM481977  | CELL |
| 48-Lymph-endo-cells | GSM481978  | CELL |
| 47-Lymph-endo-cells | GSM481979  | CELL |
| 46-Lymph-endo-cells | GSM481976  | CELL |
| 45-Lymph-endo-cells | GSM481977  | CELL |
| 44-Lymph-endo-cells | GSM481978  | CELL |
| 43-Lymph-endo-cells | GSM481979  | CELL |
| 42-Lymph-endo-cells | GSM481976  | CELL |
| 41-Lymph-endo-cells | GSM481977  | CELL |
| 40-Lymph-endo-cells | GSM481978  | CELL |
| 39-Lymph-endo-cells | GSM481979  | CELL |
| 38-Lymph-endo-cells | GSM481976  | CELL |
| 37-Lymph-endo-cells | GSM481977  | CELL |
| 36-Lymph-endo-cells | GSM481978  | CELL |
| 35-Lymph-endo-cells | GSM481979  | CELL |
| 34-Lymph-endo-cells | GSM481976  | CELL |
| 33-Lymph-endo-cells | GSM481977  | CELL |
| 32-Lymph-endo-cells | GSM481978  | CELL |
| 31-Lymph-endo-cells | GSM481979  | CELL |
| 30-Lymph-endo-cells | GSM481976  | CELL |
| 29-Lymph-endo-cells | GSM481977  | CELL |
| 28-Lymph-endo-cells | GSM481978  | CELL |
| 27-Lymph-endo-cells | GSM481979  | CELL |
| 26-Lymph-endo-cells | GSM481976  | CELL |
| 25-Lymph-endo-cells | GSM481977  | CELL |
| 24-Lymph-endo-cells | GSM481978  | CELL |
| 23-Lymph-endo-cells | GSM481979  | CELL |
| 22-Lymph-endo-cells | GSM481976  | CELL |
| 21-Lymph-endo-cells | GSM481977  | CELL |
| 20-Lymph-endo-cells | GSM481978  | CELL |
| 19-Lymph-endo-cells | GSM481979  | CELL |
| 18-Lymph-endo-cells | GSM481976  | CELL |
| 17-Lymph-endo-cells | GSM481977  | CELL |
| 16-Lymph-endo-cells | GSM481978  | CELL |
| 15-Lymph-endo-cells | GSM481979  | CELL |
| 14-Lymph-endo-cells | GSM481976  | CELL |
| 13-Lymph-endo-cells | GSM481977  | CELL |
| 12-Lymph-endo-cells | GSM481978  | CELL |
| 11-Lymph-endo-cells | GSM481979  | CELL |
| 10-Lymph-endo-cells | GSM481976  | CELL |
| 9-Lymph-endo-cells  | GSM481977  | CELL |
| 8-Lymph-endo-cells  | GSM481978  | CELL |
| 7-Lymph-endo-cells  | GSM481979  | CELL |
| 6-Lymph-endo-cells  | GSM481976  | CELL |
| 5-Lymph-endo-cells  | GSM481977  | CELL |
| 4-Lymph-endo-cells  | GSM481978  | CELL |
| 3-Lymph-endo-cells  | GSM481979  | CELL |
| 2-Lymph-endo-cells  | GSM481976  | CELL |
| 1-Lymph-endo-cells  | GSM481977  | CELL |



Cluster0004\_High in MIN-6-Pancreatic beta cell, insulin secreting (410 nodes)

1,841.5  
1,744.6  
1,647.7  
1,550.8  
1,453.8  
1,356.9  
1,260  
1,163.1  
1,066.1  
969.2  
872.3  
775.4  
678.5  
581.5  
484.6  
387.7  
290.8  
193.8  
96.9  
0

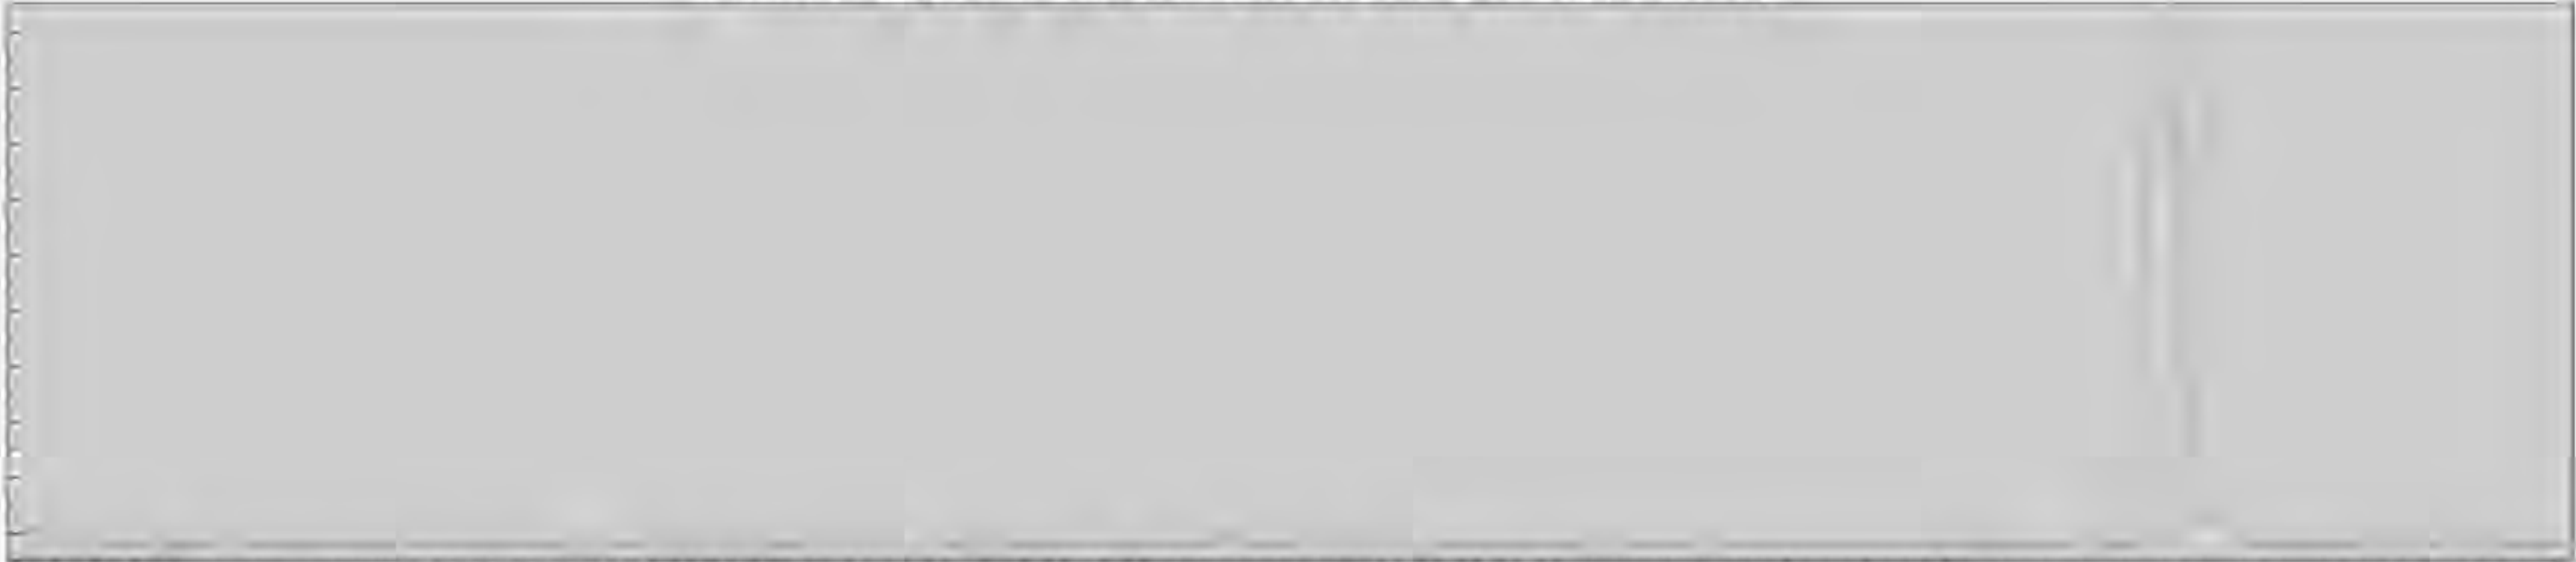

|    |                   |              |     |
|----|-------------------|--------------|-----|
| 30 | NALT              | GSM2899411   | CEL |
| 29 | NALT              | GSM2899410   | CEL |
| 28 | NALT              | GSM2899409   | CEL |
| 27 | NALT              | GSM2899408   | CEL |
| 26 | Colon-d9          | GSM1988104   | CEL |
| 25 | Colon-d9          | GSM1988103   | CEL |
| 24 | Colon-d9          | GSM1988102   | CEL |
| 23 | Colon-d4          | GSM1988101   | CEL |
| 22 | Colon-d4          | GSM1988100   | CEL |
| 21 | Intestine-large   | GSM258676    | CEL |
| 20 | Intestine-large   | GSM258675    | CEL |
| 19 | Intestine-small   | GSM258674    | CEL |
| 18 | Intestine-small   | GSM258673    | CEL |
| 17 | Lymph-nodes       | GSM258672    | CEL |
| 16 | Spleen            | GSM258671    | CEL |
| 15 | Spleen            | GSM258670    | CEL |
| 14 | Neuro2a           | GSM258669    | CEL |
| 13 | Neuro2a           | GSM258668    | CEL |
| 12 | Astrocytes        | GSM2418998   | CEL |
| 11 | ming              | GSM258667    | CEL |
| 10 | ming              | GSM258666    | CEL |
| 09 | ming              | GSM258665    | CEL |
| 08 | MIMCD3            | GSM258664    | CEL |
| 07 | MIMCD3            | GSM258663    | CEL |
| 06 | Bruce4            | GSM258662    | CEL |
| 05 | Bruce4            | GSM258661    | CEL |
| 04 | C2C12             | GSM258660    | CEL |
| 03 | C2C12             | GSM258659    | CEL |
| 02 | NH3T3             | GSM258658    | CEL |
| 01 | NH3T3             | GSM258657    | CEL |
| 00 | 3T3-L1            | GSM258656    | CEL |
| 99 | 3T3-L1            | GSM258655    | CEL |
| 98 | 10T12             | GSM258654    | CEL |
| 97 | 10T12             | GSM258653    | CEL |
| 96 | Osteoblast-d21    | GSM258652    | CEL |
| 95 | Osteoblast-d14    | GSM258651    | CEL |
| 94 | Osteoblast-d14    | GSM258650    | CEL |
| 93 | Osteoblast-d14    | GSM258649    | CEL |
| 92 | Osteoblast-d5     | GSM258648    | CEL |
| 91 | Osteoblast-d5     | GSM258647    | CEL |
| 90 | Chondrocytes      | GSM266741    | CEL |
| 89 | Chondrocytes      | GSM266740    | CEL |
| 88 | Nat Helper cell   | GSM465594    | CEL |
| 87 | Nat Helper cell   | GSM465593    | CEL |
| 86 | T cell            | GSM465592    | CEL |
| 85 | MS-1              | GSM234692    | CEL |
| 84 | Lymph-endc-cells  | GSM143704    | CEL |
| 83 | PP-FDC            | GSM481977    | CEL |
| 82 | PP-FDC            | GSM481976    | CEL |
| 81 | PP-FDC            | GSM481975    | CEL |
| 80 | E-L               | RMLNDC002001 | CEL |
| 79 | E-L               | RMLNDC002001 | CEL |
| 78 | Follicular-Bcells | GSM258654    | CEL |
| 77 | Follicular-Bcells | GSM258653    | CEL |
| 76 | MZ-Bcell          | GSM258652    | CEL |
| 75 | MZ-Bcell          | GSM258651    | CEL |
| 74 | BAF3              | GSM258650    | CEL |
| 73 | BAF3              | GSM258649    | CEL |
| 72 | Tregs             | GSM258648    | CEL |
| 71 | T-cells-CD8+      | GSM258647    | CEL |
| 70 | T-cells-CD8+      | GSM258646    | CEL |
| 69 | T-cells-CD4+      | GSM258645    | CEL |
| 68 | T-cells-CD4+      | GSM258644    | CEL |
| 67 | T-cells-CD4+      | GSM258643    | CEL |
| 66 | Thymocyte-DN      | GSM465595    | CEL |
| 65 | Osteoclasts       | GSM258642    | CEL |
| 64 | Microglia         | GSM258641    | CEL |
| 63 | Microglia         | GSM258640    | CEL |
| 62 | MM-LPS-7h         | GSM258639    | CEL |
| 61 | MM-LPS-7h         | GSM258638    | CEL |
| 60 | MM-LPS-6h         | GSM258637    | CEL |
| 59 | MM-LPS-6h         | GSM258636    | CEL |
| 58 | MM-LPS-6h         | GSM258635    | CEL |
| 57 | MM-LPS-6h         | GSM258634    | CEL |
| 56 | MM-LPS-6h         | GSM258633    | CEL |
| 55 | MM-LPS-6h         | GSM258632    | CEL |
| 54 | MM-LPS-6h         | GSM258631    | CEL |
| 53 | MM-LPS-6h         | GSM258630    | CEL |
| 52 | MM-LPS-6h         | GSM258629    | CEL |
| 51 | MM-LPS-6h         | GSM258628    | CEL |
| 50 | CD8a-DC           | GSM258627    | CEL |
| 49 | CD8a-DC           | GSM258626    | CEL |
| 48 | CD8a+DC           | GSM258625    | CEL |
| 47 | NK-cells          | GSM258624    | CEL |
| 46 | NK-cells          | GSM258623    | CEL |
| 45 | Mast-cells-IgE+Ad | GSM258622    | CEL |
| 44 | Mast-cells-IgE+Ad | GSM258621    | CEL |
| 43 | Mast-cells-IgE    | GSM258620    | CEL |
| 42 | Mast-cells-IgE    | GSM258619    | CEL |
| 41 | Mast-cells-IgE    | GSM258618    | CEL |
| 40 | Granulocytes      | GSM258617    | CEL |
| 39 | Granulocytes      | GSM258616    | CEL |
| 38 | GMP               | GSM258615    | CEL |
| 37 | GMP               | GSM258614    | CEL |
| 36 | GMP               | GSM258613    | CEL |
| 35 | GMP               | GSM258612    | CEL |
| 34 | GMP               | GSM258611    | CEL |
| 33 | GMP               | GSM258610    | CEL |
| 32 | GMP               | GSM258609    | CEL |
| 31 | MEP               | GSM258608    | CEL |
| 30 | MEP               | GSM258607    | CEL |
| 29 | MEP               | GSM258606    | CEL |
| 28 | MEP               | GSM258605    | CEL |
| 27 | MEP               | GSM258604    | CEL |
| 26 | MEP               | GSM258603    | CEL |
| 25 | MEP               | GSM258602    | CEL |
| 24 | MEP               | GSM258601    | CEL |
| 23 | MEP               | GSM258600    | CEL |
| 22 | MEP               | GSM258599    | CEL |
| 21 | MEP               | GSM258598    | CEL |
| 20 | MEP               | GSM258597    | CEL |
| 19 | MEP               | GSM258596    | CEL |
| 18 | MEP               | GSM258595    | CEL |
| 17 | MEP               | GSM258594    | CEL |
| 16 | MEP               | GSM258593    | CEL |
| 15 | MEP               | GSM258592    | CEL |
| 14 | MEP               | GSM258591    | CEL |
| 13 | MEP               | GSM258590    | CEL |
| 12 | MEP               | GSM258589    | CEL |
| 11 | MEP               | GSM258588    | CEL |
| 10 | MEP               | GSM258587    | CEL |
| 09 | MEP               | GSM258586    | CEL |
| 08 | MEP               | GSM258585    | CEL |
| 07 | MEP               | GSM258584    | CEL |
| 06 | MEP               | GSM258583    | CEL |
| 05 | MEP               | GSM258582    | CEL |
| 04 | MEP               | GSM258581    | CEL |
| 03 | MEP               | GSM258580    | CEL |
| 02 | MEP               | GSM258579    | CEL |
| 01 | MEP               | GSM258578    | CEL |
| 00 | MEP               | GSM258577    | CEL |
| 99 | MEP               | GSM258576    | CEL |
| 98 | MEP               | GSM258575    | CEL |
| 97 | MEP               | GSM258574    | CEL |
| 96 | MEP               | GSM258573    | CEL |
| 95 | MEP               | GSM258572    | CEL |
| 94 | MEP               | GSM258571    | CEL |
| 93 | MEP               | GSM258570    | CEL |
| 92 | MEP               | GSM258569    | CEL |
| 91 | MEP               | GSM258568    | CEL |
| 90 | MEP               | GSM258567    | CEL |
| 89 | MEP               | GSM258566    | CEL |
| 88 | MEP               | GSM258565    | CEL |
| 87 | MEP               | GSM258564    | CEL |
| 86 | MEP               | GSM258563    | CEL |
| 85 | MEP               | GSM258562    | CEL |
| 84 | MEP               | GSM258561    | CEL |
| 83 | MEP               | GSM258560    | CEL |
| 82 | MEP               | GSM258559    | CEL |
| 81 | MEP               | GSM258558    | CEL |
| 80 | MEP               | GSM258557    | CEL |
| 79 | MEP               | GSM258556    | CEL |
| 78 | MEP               | GSM258555    | CEL |
| 77 | MEP               | GSM258554    | CEL |
| 76 | MEP               | GSM258553    | CEL |
| 75 | MEP               | GSM258552    | CEL |
| 74 | MEP               | GSM258551    | CEL |
| 73 | MEP               | GSM258550    | CEL |
| 72 | MEP               | GSM258549    | CEL |
| 71 | MEP               | GSM258548    | CEL |
| 70 | MEP               | GSM258547    | CEL |
| 69 | MEP               | GSM258546    | CEL |
| 68 | MEP               | GSM258545    | CEL |
| 67 | MEP               | GSM258544    | CEL |
| 66 | MEP               | GSM258543    | CEL |
| 65 | MEP               | GSM258542    | CEL |
| 64 | MEP               | GSM258541    | CEL |
| 63 | MEP               | GSM258540    | CEL |
| 62 | MEP               | GSM258539    | CEL |
| 61 | MEP               | GSM258538    | CEL |
| 60 | MEP               | GSM258537    | CEL |
| 59 | MEP               | GSM258536    | CEL |
| 58 | MEP               | GSM258535    | CEL |
| 57 | MEP               | GSM258534    | CEL |
| 56 | MEP               | GSM258533    | CEL |
| 55 | MEP               | GSM258532    | CEL |
| 54 | MEP               | GSM258531    | CEL |
| 53 | MEP               | GSM258530    | CEL |
| 52 | MEP               | GSM258529    | CEL |
| 51 | MEP               | GSM258528    | CEL |
| 50 | MEP               | GSM258527    | CEL |
| 49 | MEP               | GSM258526    | CEL |
| 48 | MEP               | GSM258525    | CEL |
| 47 | MEP               | GSM258524    | CEL |
| 46 | MEP               | GSM258523    | CEL |
| 45 | MEP               | GSM258522    | CEL |
| 44 | MEP               | GSM258521    | CEL |
| 43 | MEP               | GSM258520    | CEL |
| 42 | MEP               | GSM258519    | CEL |
| 41 | MEP               | GSM258518    | CEL |
| 40 | MEP               | GSM258517    | CEL |
| 39 | MEP               | GSM258516    | CEL |
| 38 | MEP               | GSM258515    | CEL |
| 37 | MEP               | GSM258514    | CEL |
| 36 | MEP               | GSM258513    | CEL |
| 35 | MEP               | GSM258512    | CEL |
| 34 | MEP               | GSM258511    | CEL |
| 33 | MEP               | GSM258510    | CEL |
| 32 | MEP               | GSM258509    | CEL |
| 31 | MEP               | GSM258508    | CEL |
| 30 | MEP               | GSM258507    | CEL |
| 29 | MEP               | GSM258506    | CEL |
| 28 | MEP               | GSM258505    | CEL |
| 27 | MEP               | GSM258504    | CEL |
| 26 | MEP               | GSM258503    | CEL |
| 25 | MEP               | GSM258502    | CEL |
| 24 | MEP               | GSM258501    | CEL |
| 23 | MEP               | GSM258500    | CEL |
| 22 | MEP               | GSM258499    | CEL |
| 21 | MEP               | GSM258498    | CEL |
| 20 | MEP               | GSM258497    | CEL |
| 19 | MEP               | GSM258496    | CEL |
| 18 | MEP               | GSM258495    | CEL |
| 17 | MEP               | GSM258494    | CEL |
| 16 | MEP               | GSM258493    | CEL |
| 15 | MEP               | GSM258492    | CEL |
| 14 | MEP               | GSM258491    | CEL |
| 13 | MEP               | GSM258490    | CEL |
| 12 | MEP               | GSM258489    | CEL |
| 11 | MEP               | GSM258488    | CEL |
| 10 | MEP               | GSM258487    | CEL |
| 09 | MEP               | GSM258486    | CEL |
| 08 | MEP               | GSM258485    | CEL |
| 07 | MEP               | GSM258484    | CEL |
| 06 | MEP               | GSM258483    | CEL |
| 05 | MEP               | GSM258482    | CEL |
| 04 | MEP               | GSM258481    | CEL |
| 03 | MEP               | GSM258480    | CEL |
| 02 | MEP               | GSM258479    | CEL |
| 01 | MEP               | GSM258478    | CEL |
| 00 | MEP               | GSM258477    | CEL |
| 99 | MEP               | GSM258476    | CEL |
| 98 | MEP               | GSM258475    | CEL |
| 97 | MEP               | GSM258474    | CEL |
| 96 | MEP               | GSM258473    | CEL |
| 95 | MEP               | GSM258472    | CEL |
| 94 | MEP               | GSM258471    | CEL |
| 93 | MEP               | GSM258470    | CEL |
| 92 | MEP               | GSM258469    | CEL |
| 91 | MEP               | GSM258468    | CEL |
| 90 | MEP               | GSM258467    | CEL |
| 89 | MEP               | GSM258466    | CEL |
| 88 | MEP               | GSM258465    | CEL |
| 87 | MEP               | GSM258464    | CEL |
| 86 | MEP               | GSM258463    | CEL |
| 85 | MEP               | GSM258462    | CEL |
| 84 | MEP               | GSM258461    | CEL |
| 83 | MEP               | GSM258460    | CEL |
| 82 | MEP               | GSM258459    | CEL |
| 81 | MEP               | GSM258458    | CEL |
| 80 | MEP               | GSM258457    | CEL |
| 79 | MEP               | GSM258456    | CEL |
| 78 | MEP               | GSM258455    | CEL |
| 77 | MEP               | GSM258454    | CEL |
| 76 | MEP               | GSM258453    | CEL |
| 75 | MEP               | GSM258452    | CEL |
| 74 | MEP               | GSM258451    | CEL |
| 73 | MEP               | GSM258450    | CEL |
| 72 | MEP               | GSM258449    | CEL |
| 71 | MEP               | GSM258448    | CEL |
| 70 | MEP               | GSM258447    | CEL |
| 69 | MEP               | GSM258446    | CEL |
| 68 | MEP               | GSM258445    | CEL |
| 67 | MEP               | GSM258444    | CEL |
| 66 | MEP               | GSM258443    | CEL |
| 65 | MEP               | GSM258442    | CEL |
| 64 | MEP               | GSM258441    | CEL |
| 63 | MEP               | GSM258440    | CEL |
| 62 | MEP               | GSM258439    | CEL |
| 61 | MEP               | GSM258438    | CEL |
| 60 | MEP               | GSM258437    | CEL |
| 59 | MEP               | GSM258436    | CEL |
| 58 | MEP               | GSM258435    | CEL |
| 57 | MEP               | GSM258434    | CEL |
| 56 | MEP               | GSM258433    | CEL |
| 55 | MEP               | GSM258432    | CEL |
| 54 | MEP               | GSM258431    | CEL |
| 53 | MEP               | GSM258430    | CEL |
| 52 | MEP               | GSM258429    | CEL |
| 51 | MEP               | GSM258428    | CEL |
| 50 | MEP               | GSM258427    | CEL |
| 49 | MEP               | GSM258426    | CEL |
| 48 | MEP               | GSM258425    | CEL |
| 47 | MEP               | GSM258424    | CEL |
| 46 | MEP               | GSM258423    | CEL |
| 45 | MEP               | GSM258422    | CEL |
| 44 | MEP               | GSM258421    | CEL |
| 43 | MEP               | GSM258420    | CEL |
| 42 | MEP               | GSM258419    | CEL |
| 41 | MEP               | GSM258418    | CEL |
| 40 | MEP               | GSM258417    | CEL |
| 39 | MEP               | GSM258416    | CEL |
| 38 | MEP               | GSM258415    | CEL |
| 37 | MEP               | GSM258414    | CEL |
| 36 | MEP               | GSM258413    | CEL |
| 35 | MEP               | GSM258412    | CEL |
| 34 | MEP               | GSM258411    | CEL |
| 33 | MEP               | GSM258410    | CEL |
| 32 | MEP               | GSM258409    | CEL |
| 31 | MEP               | GSM258408    | CEL |
| 30 | MEP               | GSM258407    | CEL |
| 29 | MEP               | GSM258406    | CEL |
| 28 | MEP               | GSM258405    | CEL |
| 27 | MEP               | GSM258404    | CEL |
| 26 | MEP               | GSM258403    | CEL |
| 25 | MEP               | GSM258402    | CEL |
| 24 | MEP               | GSM258401    | CEL |
| 23 | MEP               | GSM258400    | CEL |
| 22 | MEP               | GSM258399    | CEL |
| 21 | MEP               | GSM258398    | CEL |
| 20 | MEP               | GSM258397    | CEL |
| 19 | MEP               | GSM258396    | CEL |
| 18 | MEP               | GSM258395    | CEL |
| 17 | MEP               | GSM258394    | CEL |
| 16 | MEP               | GSM258393    | CEL |
| 15 | MEP               | GSM258392    | CEL |
| 14 | MEP               | GSM258391    | CEL |
| 13 | MEP               | GSM258390    | CEL |
| 12 | MEP               | GSM258389    | CEL |
| 11 | MEP               | GSM258388    |     |



Cluster005\_High in NALT (350 nodes)

2,918.9  
2,765.2  
2,611.6  
2,458  
2,304.4  
2,150.7  
1,997.1  
1,843.5  
1,689.9  
1,536.2  
1,382.6  
1,229  
1,075.4  
921.7  
768.1  
614.5  
460.9  
307.2  
153.6  
0

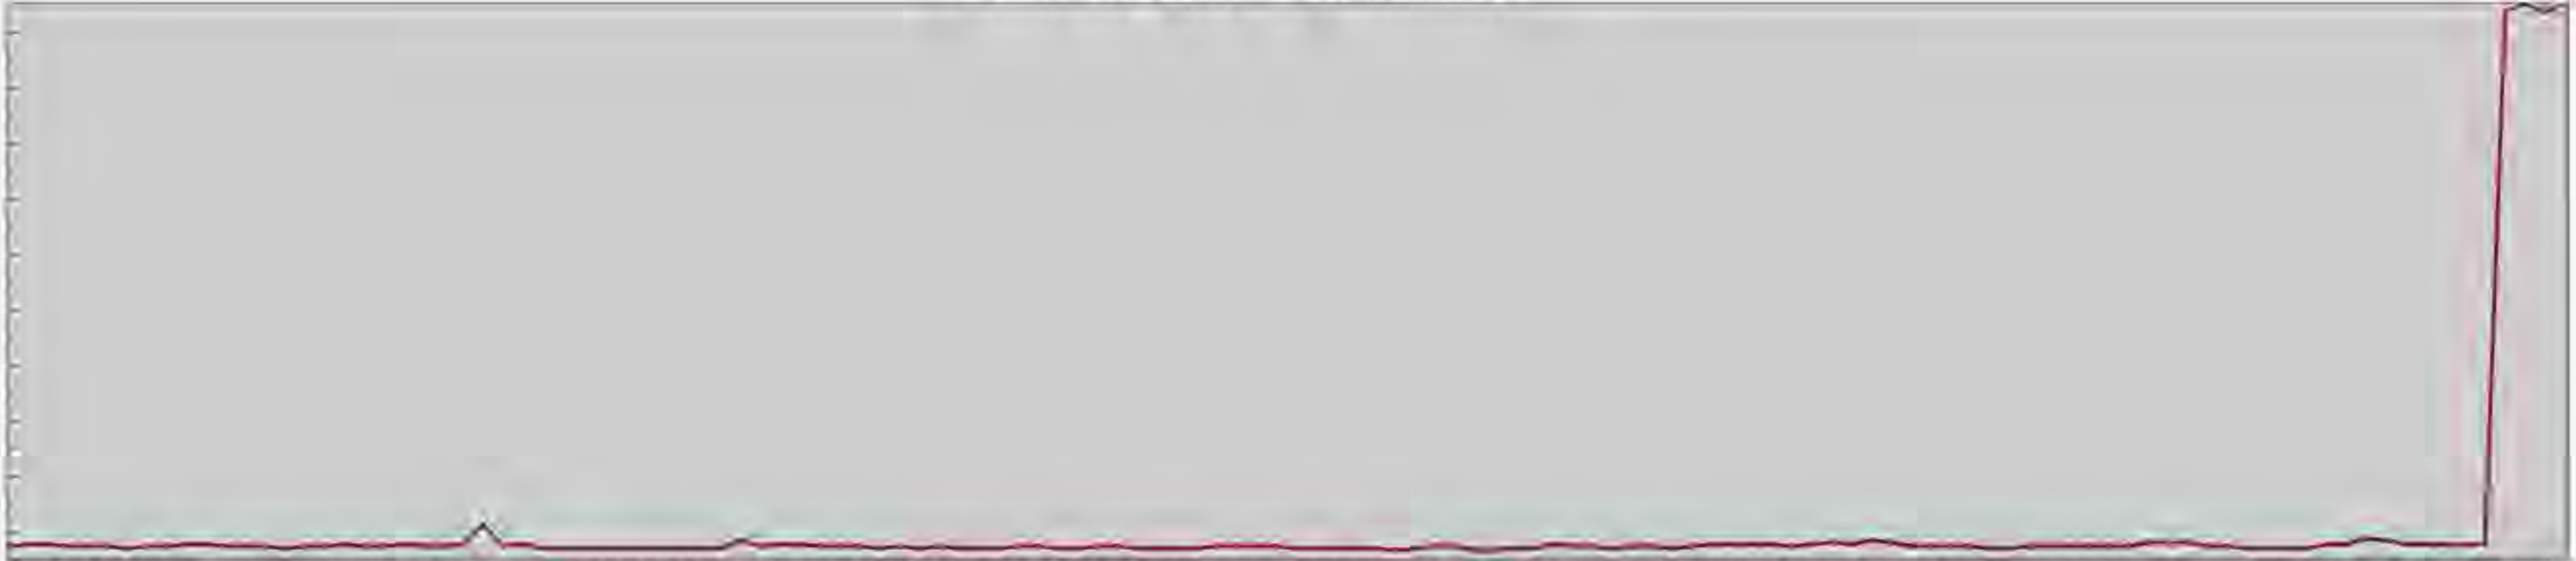

30- NALT GSM289411 CELL  
 129- NALT GSM289410 CELL  
 128- NALT GSM289409 CELL  
 127- NALT GSM289408 CELL  
 126- Colon-d9 GSM1988105 CELL  
 125- Colon-d9 GSM1988104 CELL  
 124- Colon-d9 GSM1988103 CELL  
 123- Colon-d4 GSM1988102 CELL  
 122- Colon-d4 GSM1988101 CELL  
 121- Intestine-large GSM258676 CELL  
 120- Intestine-large GSM258675 CELL  
 119- Intestine-small GSM258674 CELL  
 118- Intestine-small GSM258673 CELL  
 117- Lymph-nodes GSM258672 CELL  
 116- Spleen GSM258671 CELL  
 115- Spleen GSM258670 CELL  
 114- Neuro2a GSM258669 CELL  
 113- Astrocytes GSM241898 CELL  
 110- mimb GSM2586725 CELL  
 109- mimb GSM2586724 CELL  
 108- MIMCD3 GSM2586723 CELL  
 107- MIMCD3 GSM2586722 CELL  
 106- Bruce4 GSM2586721 CELL  
 105- Bruce4 GSM2586720 CELL  
 104- C2C12 GSM2586719 CELL  
 103- C2C12 GSM2586718 CELL  
 102- NIH3T3 GSM2586717 CELL  
 101- NIH3T3 GSM2586716 CELL  
 100- 3T3-L1 GSM2586715 CELL  
 99- 3T3-L1 GSM2586714 CELL  
 98- 10T1/2 GSM2586713 CELL  
 97- 10T1/2 GSM2586712 CELL  
 96- Osteoblast-d21 GSM2586711 CELL  
 95- Osteoblast-d21 GSM2586710 CELL  
 94- Osteoblast-d14 GSM2586709 CELL  
 93- Osteoblast-d14 GSM2586708 CELL  
 92- Osteoblast-d5 GSM2586707 CELL  
 91- Osteoblast-d5 GSM2586706 CELL  
 90- Chondrocytes GSM2586705 CELL  
 88- Nat Helper cell GSM465594 CELL  
 87- Nat Helper cell GSM465593 CELL  
 86- T cell GSM465592 CELL  
 85- MS-1 GSM234692 CELL  
 84- Lymph-endo-cells GSM143704 CELL  
 83- P-FDC GSM481977 CELL  
 82- P-FDC GSM481976 CELL  
 81- P-FDC GSM481975 CELL  
 80- F-LY RMLNDCC003001 CELL  
 79- F-LY RMLNDCC003001 CELL  
 78- Follicular-Bcells GSM258664 CELL  
 77- Follicular-Bcells GSM258663 CELL  
 76- MZ-Bcell GSM258662 CELL  
 75- MZ-Bcell GSM258661 CELL  
 74- BAF3 GSM258660 CELL  
 73- BAF3 GSM258659 CELL  
 72- Tregs GSM258658 CELL  
 71- Tregs GSM258657 CELL  
 70- T-cells-CD8+ GSM258656 CELL  
 69- T-cells-CD8+ GSM258655 CELL  
 68- T-cells-CD4+ GSM258654 CELL  
 67- T-cells-CD4+ GSM258653 CELL  
 66- Thymocyte-DN GSM465595 CELL  
 65- Osteoclasts GSM258652 CELL  
 64- Microglia GSM258651 CELL  
 63- Microglia GSM258650 CELL  
 62- MM-LPS-7h GSM258649 CELL  
 61- MM-LPS-7h GSM258648 CELL  
 60- MM-LPS-6h GSM258647 CELL  
 59- MM-LPS-6h GSM258646 CELL  
 58- MM-LPS-6h GSM258645 CELL  
 57- MM-LPS-6h GSM258644 CELL  
 56- MM-LPS-6h GSM258643 CELL  
 55- MM-LPS-6h GSM258642 CELL  
 54- MM-LPS-6h GSM258641 CELL  
 53- MM-LPS-6h GSM258640 CELL  
 52- MM-LPS-6h GSM258639 CELL  
 51- MM-LPS-6h GSM258638 CELL  
 50- CD8a-DC GSM258637 CELL  
 49- CD8a-DC GSM258636 CELL  
 48- CD8a+DC GSM258635 CELL  
 47- NK-cells GSM258634 CELL  
 46- NK-cells GSM258633 CELL  
 45- Mast-cells-IgE+Ad GSM258632 CELL  
 44- Mast-cells-IgE+Ad GSM258631 CELL  
 43- Mast-cells-IgE GSM258630 CELL  
 42- Mast-cells-IgE GSM258629 CELL  
 41- Mast-cells-IgE GSM258628 CELL  
 40- Mast-cells-IgE GSM258627 CELL  
 39- Granulocytes GSM258626 CELL  
 38- Granulocytes GSM258625 CELL  
 37- GMP GSM258624 CELL  
 36- GMP GSM258623 CELL  
 35- GMP GSM258622 CELL  
 34- MEMP GSM258621 CELL  
 33- MEMP GSM258620 CELL  
 32- MEMP GSM258619 CELL  
 31- HESC GSM258618 CELL  
 30- HESC GSM258617 CELL  
 29- Bone marrow GSM258616 CELL  
 28- Bone marrow GSM258615 CELL  
 27- Paneth-cells-GF-1 GSM116357 CELL  
 26- Paneth-cells-GF-1 GSM116356 CELL  
 25- Paneth-cells GSM116355 CELL  
 24- Paneth-cells GSM116354 CELL  
 23- Paneth-cells GSM116353 CELL  
 22- Paneth-cells GSM116352 CELL  
 21- Colon-Crypt GSM480375 CELL  
 20- Colon-Crypt GSM480374 CELL  
 19- Colon-Vill GSM480363 CELL  
 18- Colon-Vill GSM480362 CELL  
 17- Colon-IEC-GF GSM349880 CELL  
 16- Colon-IEC-GF GSM350375 CELL  
 15- Ileum-IEC-GF GSM350376 CELL  
 14- Ileum-IEC GSM350371 CELL  
 13- Small-intestine-epithelium RMINEP002901 CELL  
 12- Small-intestine-epithelium RMINEP001001 CELL  
 11- FAE RMPYEP002001 CELL  
 10- FAE RMPYEP001001 CELL  
 09- Ileum-IEC GSM190797 CELL  
 08- Ileum-IEC GSM190796 CELL  
 07- Ileum-IEC GSM190795 CELL  
 06- CT-w-M-cells GSM190794 CELL  
 05- CT-y-M-cells GSM190793 CELL  
 04- CT-y-M-cells GSM190792 CELL  
 03- PP-M-cells GSM190791 CELL  
 02- PP-M-cells GSM190790 CELL  
 01- PP-M-cells GSM190789 CELL



Cluster0006\_House keeping-cell cycle (244 nodes)

2,030.7  
1,923.8  
1,817  
1,710.1  
1,603.2  
1,496.3  
1,389.4  
1,282.6  
1,175.7  
1,068.8  
961.9  
855  
748.2  
641.3  
534.4  
427.5  
320.6  
213.8  
106.9  
0

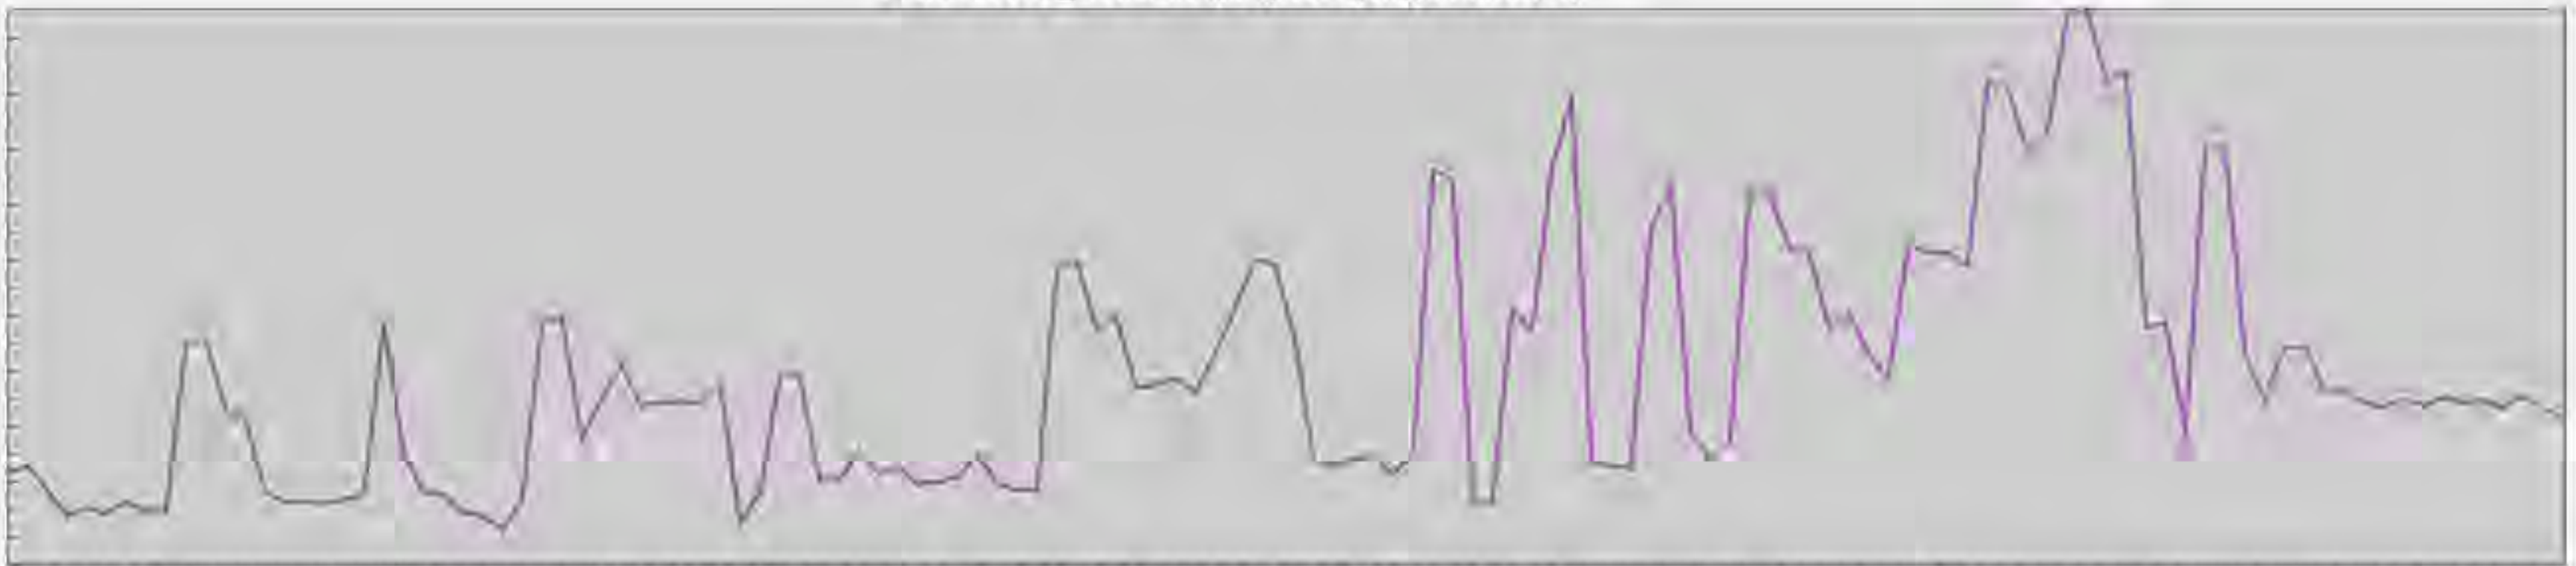

130- NALT GSM289411.CEL  
129- NALT GSM289410.CEL  
128- NALT GSM289409.CEL  
127- NALT GSM289408.CEL  
126- Colon-d9 GSM1988105.CEL  
125- Colon-d9 GSM1988104.CEL  
124- Colon-d9 GSM1988103.CEL  
123- Colon-d4 GSM1988102.CEL  
122- Colon-d4 GSM1988101.CEL  
121- Intestine-large GSM258676.CEL  
120- Intestine-large GSM258675.CEL  
119- Intestine-small GSM258678.CEL  
118- Intestine-small GSM258692.CEL  
117- Lymph-nodes GSM258691.CEL  
116- Lymph-nodes GSM258726.CEL  
115- Spleen GSM258768.CEL  
114- Spleen GSM258767.CEL  
113- Neuro2a GSM258728.CEL  
112- Neuro2a GSM258727.CEL  
111- Astrocytes GSM241898.CEL  
110- mimg GSM258725.CEL  
109- mimg GSM258724.CEL  
108- MIMCD3 GSM258723.CEL  
107- MIMCD3 GSM258722.CEL  
106- Bruce4 GSM258656.CEL  
105- Bruce4 GSM258655.CEL  
104- C2C12 GSM258690.CEL  
103- C2C12 GSM258629.CEL  
102- NIH3T3 GSM258730.CEL  
101- NIH3T3 GSM258729.CEL  
99- 3T3-L1 GSM258610.CEL  
98- 10T12 GSM258609.CEL  
97- 10T12 GSM258631.CEL  
96- Osteoblast-d21 GSM258740.CEL  
95- Osteoblast-d21 GSM258739.CEL  
94- Osteoblast-d14 GSM258738.CEL  
93- Osteoblast-d14 GSM258737.CEL  
92- Osteoblast-d5 GSM258742.CEL  
91- Osteoblast-d5 GSM258741.CEL  
90- Chondrocytes GSM266741.CEL  
89- Chondrocytes GSM266740.CEL  
88- Nat Helper cell GSM465594.CEL  
87- Nat Helper cell GSM465593.CEL  
86- T cell GSM465596.CEL  
85- MS-1 GSM234692.CEL  
84- Lymph-endo-cells GSM143704.CEL  
83- PP-FDC GSM481977.CEL  
82- PP-FDC GSM481978.CEL  
81- PP-FDC GSM481976.CEL  
80- FLY RMLNDCC003001.CEL  
79- FLY RMLNDCC003001.CEL  
78- Follicular-Bcells GSM258664.CEL  
77- Follicular-Bcells GSM258663.CEL  
76- MZ-Bcell GSM258622.CEL  
75- MZ-Bcell GSM258621.CEL  
74- BAF3 GSM258620.CEL  
73- BAF3 GSM258619.CEL  
72- Tregs GSM258778.CEL  
71- Tregs GSM258777.CEL  
70- T-cells-CD8+ GSM258776.CEL  
69- T-cells-CD8+ GSM258775.CEL  
68- T-cells-CD4+ GSM258774.CEL  
67- T-cells-CD4+ GSM258773.CEL  
66- Thymocyte-DN GSM465595.CEL  
65- Osteoclasts GSM258744.CEL  
64- Microglia GSM258721.CEL  
63- Microglia GSM258721.CEL  
62- PMM-LPS-7h GSM258706.CEL  
61- PMM-LPS-7h GSM258705.CEL  
60- PMM-LPS-6h GSM258702.CEL  
59- PMM-LPS-6h GSM258701.CEL  
58- BMM-LPS-6h GSM258699.CEL  
57- BMM-LPS-6h GSM258699.CEL  
56- BMM-LPS-6h GSM258699.CEL  
55- BMM-LPS-6h GSM258699.CEL  
54- BMM-LPS-6h GSM258699.CEL  
53- Plasmacytoid-DC GSM258650.CEL  
52- Plasmacytoid-DC GSM258649.CEL  
51- CD8a-DC GSM258648.CEL  
50- CD8a-DC GSM258647.CEL  
49- CD8a+DC GSM258646.CEL  
48- CD8a+DC GSM258645.CEL  
47- NK-cells GSM258732.CEL  
46- NK-cells GSM258731.CEL  
45- Mast-cells-IgE+Ad GSM258718.CEL  
44- Mast-cells-IgE+Ad GSM258717.CEL  
43- Mast-cells-IgE GSM258714.CEL  
42- Mast-cells-IgE GSM258713.CEL  
41- Mast-cells GSM258712.CEL  
40- Granulocytes GSM258668.CEL  
39- Granulocytes GSM258667.CEL  
38- GMP GSM258666.CEL  
37- GMP GSM258665.CEL  
36- GMP GSM258664.CEL  
35- CMP GSM258642.CEL  
34- CMP GSM258641.CEL  
33- MIEP GSM258720.CEL  
32- MIEP GSM258719.CEL  
31- H9C GSM258770.CEL  
30- H9C GSM258770.CEL  
29- Bone marrow GSM258628.CEL  
28- Bone marrow GSM258627.CEL  
27- Paneth-cells-GF GSM116358.CEL  
26- Paneth-cells-GF-1 GSM116357.CEL  
25- Paneth-cells GSM116350.CEL  
24- Paneth-cells GSM116359.CEL  
23- Paneth-cells GSM318589.CEL  
22- Paneth-cells GSM318590.CEL  
21- Colon-Crypt GSM480375.CEL  
20- Colon-Crypt GSM480374.CEL  
19- Colon-Vill GSM480363.CEL  
18- Colon-Vill GSM480362.CEL  
17- Colon-IEC-GF GSM349880.CEL  
16- Colon-IEC-GF GSM350375.CEL  
15- Ileum-IEC-GF GSM350376.CEL  
14- Ileum-IEC GSM350371.CEL  
13- Small-intestine-epithelium RMINEP002901.CEL  
12- Small-intestine-epithelium RMINEP001001.CEL  
11- FAE RMPYEP002001.CEL  
10- FAE RMPYEP001001.CEL  
09- Ileum-IEC GSM190797.CEL  
08- Ileum-IEC GSM190796.CEL  
07- Ileum-IEC GSM190795.CEL  
06- CT-v-M-cells GSM190794.CEL  
05- CT-v-M-cells GSM190793.CEL  
04- CT-v-M-cells GSM190792.CEL  
03- PP-M-cells GSM190791.CEL  
02- PP-M-cells GSM190790.CEL  
01- PP-M-cells GSM190789.CEL



Cluster007\_High in Neuro2A cells (238 nodes)

906.6  
858.8  
811.1  
763.4  
715.7  
668  
620.3  
572.6  
524.8  
477.1  
429.4  
381.7  
334  
286.3  
238.6  
190.9  
143.1  
95.4  
47.7  
0

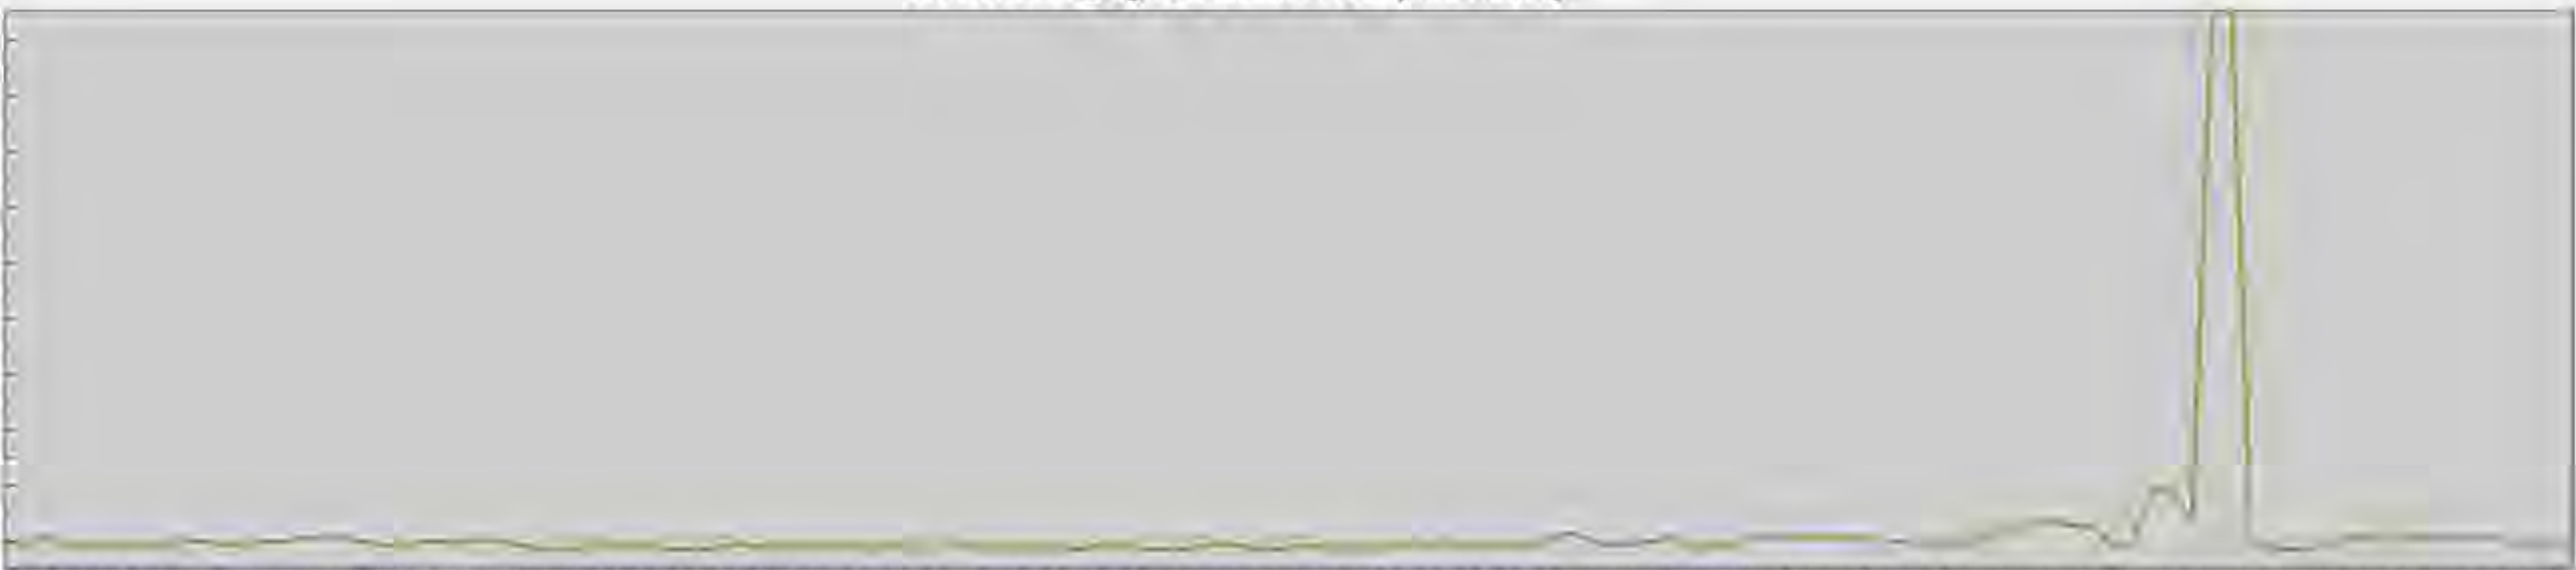

|     |                            |              |      |
|-----|----------------------------|--------------|------|
| 30  | NALT                       | GSM289411    | CELL |
| 139 | NALT                       | GSM289410    | CELL |
| 138 | NALT                       | GSM289409    | CELL |
| 137 | NALT                       | GSM289408    | CELL |
| 136 | Colon-d9                   | GSM1988104   | CELL |
| 135 | Colon-d9                   | GSM1988103   | CELL |
| 134 | Colon-d4                   | GSM1988102   | CELL |
| 133 | Colon-d4                   | GSM1988101   | CELL |
| 132 | Colon-d4                   | GSM1988100   | CELL |
| 131 | Intestine-large            | GSM258676    | CELL |
| 130 | Intestine-large            | GSM258675    | CELL |
| 129 | Intestine-small            | GSM258674    | CELL |
| 118 | Intestine-small            | GSM258673    | CELL |
| 117 | Lymph-nodes                | GSM258672    | CELL |
| 116 | Spleen                     | GSM258671    | CELL |
| 115 | Spleen                     | GSM258670    | CELL |
| 114 | Neuro2a                    | GSM258669    | CELL |
| 113 | Neuro2a                    | GSM258668    | CELL |
| 112 | Neuro2a                    | GSM258667    | CELL |
| 111 | Astrocytes                 | GSM241898    | CELL |
| 110 | mim6                       | GSM258726    | CELL |
| 109 | mim6                       | GSM258725    | CELL |
| 108 | MIMCD3                     | GSM258724    | CELL |
| 107 | MIMCD3                     | GSM258723    | CELL |
| 106 | Bruce4                     | GSM258666    | CELL |
| 105 | Bruce4                     | GSM258665    | CELL |
| 104 | C2C12                      | GSM258664    | CELL |
| 103 | C2C12                      | GSM258663    | CELL |
| 102 | NH3T3                      | GSM258730    | CELL |
| 101 | NH3T3                      | GSM258729    | CELL |
| 100 | 3T3-L1                     | GSM258610    | CELL |
| 99  | 3T3-L1                     | GSM258609    | CELL |
| 98  | 10T12                      | GSM258632    | CELL |
| 97  | 10T12                      | GSM258631    | CELL |
| 96  | Osteoblast-d21             | GSM258740    | CELL |
| 95  | Osteoblast-d21             | GSM258739    | CELL |
| 94  | Osteoblast-d14             | GSM258738    | CELL |
| 93  | Osteoblast-d14             | GSM258737    | CELL |
| 92  | Osteoblast-d5              | GSM258742    | CELL |
| 91  | Osteoblast-d5              | GSM258741    | CELL |
| 90  | Chondrocytes               | GSM266741    | CELL |
| 89  | Chondrocytes               | GSM266740    | CELL |
| 88  | Nat Helper cell            | GSM465594    | CELL |
| 87  | Nat Helper cell            | GSM465593    | CELL |
| 86  | Tt cell                    | GSM465596    | CELL |
| 85  | MS-1                       | GSM234692    | CELL |
| 84  | Lymph-endc-cells           | GSM143704    | CELL |
| 83  | PP-FDC                     | GSM481977    | CELL |
| 82  | PP-FDC                     | GSM481978    | CELL |
| 81  | PP-FDC                     | GSM481976    | CELL |
| 80  | E-LY                       | RMLNDC003001 | CELL |
| 79  | E-LY                       | RMLNDC003001 | CELL |
| 78  | Follicular-Bcells          | GSM258664    | CELL |
| 77  | Follicular-Bcells          | GSM258663    | CELL |
| 76  | MZ-Bcell                   | GSM258622    | CELL |
| 75  | MZ-Bcell                   | GSM258621    | CELL |
| 74  | BAF3                       | GSM258620    | CELL |
| 73  | BAF3                       | GSM258619    | CELL |
| 72  | Tregs                      | GSM258778    | CELL |
| 71  | T-cells-CD8+               | GSM258777    | CELL |
| 70  | T-cells-CD8+               | GSM258776    | CELL |
| 69  | T-cells-CD4+               | GSM258774    | CELL |
| 68  | T-cells-CD4+               | GSM258773    | CELL |
| 67  | T-cells-CD4+               | GSM258744    | CELL |
| 66  | Thymocyte-DN               | GSM465595    | CELL |
| 65  | Osteoclasts                | GSM258743    | CELL |
| 64  | Microglia                  | GSM258721    | CELL |
| 63  | Microglia                  | GSM258721    | CELL |
| 62  | MM-LPS-7h                  | GSM258706    | CELL |
| 61  | MM-LPS-7h                  | GSM258705    | CELL |
| 60  | MM-LPS-6h                  | GSM258702    | CELL |
| 59  | MM-LPS-6h                  | GSM258701    | CELL |
| 58  | MM-LPS-6h                  | GSM258699    | CELL |
| 57  | MM-LPS-6h                  | GSM258699    | CELL |
| 56  | MM-LPS-6h                  | GSM258694    | CELL |
| 55  | MM-LPS-6h                  | GSM258694    | CELL |
| 54  | MM-LPS-6h                  | GSM258694    | CELL |
| 53  | MM-LPS-6h                  | GSM258694    | CELL |
| 52  | MM-LPS-6h                  | GSM258694    | CELL |
| 51  | MM-LPS-6h                  | GSM258694    | CELL |
| 50  | CD8a-DC                    | GSM258647    | CELL |
| 49  | CD8a-DC                    | GSM258647    | CELL |
| 48  | CD8a+DC                    | GSM258646    | CELL |
| 47  | NK-cells                   | GSM258732    | CELL |
| 46  | NK-cells                   | GSM258731    | CELL |
| 45  | Mast-cells-IgE+Ad          | GSM258718    | CELL |
| 44  | Mast-cells-IgE+Ad          | GSM258717    | CELL |
| 43  | Mast-cells-IgE             | GSM258714    | CELL |
| 42  | Mast-cells-IgE             | GSM258713    | CELL |
| 41  | Mast-cells                 | GSM258712    | CELL |
| 40  | Granulocytes               | GSM258667    | CELL |
| 39  | Granulocytes               | GSM258667    | CELL |
| 38  | GMP                        | GSM258666    | CELL |
| 37  | GMP                        | GSM258665    | CELL |
| 36  | GMP                        | GSM258664    | CELL |
| 35  | GMP                        | GSM258664    | CELL |
| 34  | GMP                        | GSM258672    | CELL |
| 33  | GMP                        | GSM258672    | CELL |
| 32  | GMP                        | GSM258672    | CELL |
| 31  | MEP                        | GSM258770    | CELL |
| 30  | MEP                        | GSM258770    | CELL |
| 29  | HS-C                       | GSM258770    | CELL |
| 28  | Bone marrow                | GSM258628    | CELL |
| 27  | paneth-cells-GF            | GSM116358    | CELL |
| 26  | paneth-cells-GF            | GSM116357    | CELL |
| 25  | paneth-cells               | GSM116350    | CELL |
| 24  | paneth-cells               | GSM116359    | CELL |
| 23  | paneth-cells               | GSM318589    | CELL |
| 22  | paneth-cells               | GSM318590    | CELL |
| 21  | Colon-Crypt                | GSM480375    | cel  |
| 20  | Colon-Crypt                | GSM480374    | cel  |
| 19  | Colon-Vill                 | GSM480363    | cel  |
| 18  | Colon-Vill                 | GSM480362    | cel  |
| 17  | Colon-IEC-GF               | GSM349880    | CEL  |
| 16  | Colon-IEC-GF               | GSM350375    | CEL  |
| 15  | ileum-IEC                  | GSM350376    | CEL  |
| 14  | ileum-IEC                  | GSM350371    | CEL  |
| 13  | Small-intestine-epithelium | RMINEP002901 | CEL  |
| 12  | Small-intestine-epithelium | RMINEP001001 | CEL  |
| 11  | FAE-RMPYEP001001           | CEL          |      |
| 10  | FAE-RMPYEP001001           | CEL          |      |
| 09  | ileum-IEC                  | GSM190797    | CEL  |
| 08  | ileum-IEC                  | GSM190796    | CEL  |
| 07  | ileum-IEC                  | GSM190795    | CEL  |
| 06  | CT-w-M-cells               | GSM190794    | CEL  |
| 05  | CT-w-M-cells               | GSM190793    | CEL  |
| 04  | CT-y-M-cells               | GSM190792    | CEL  |
| 03  | PP-M-cells                 | GSM190791    | CEL  |
| 02  | PP-M-cells                 | GSM190790    | CEL  |
| 01  | PP-M-cells                 | GSM190789    | CEL  |



Cluster0008\_High in differentiating osteoblasts (236 nodes)

2,445.8  
2,317.1  
2,188.4  
2,059.6  
1,930.9  
1,802.2  
1,673.5  
1,544.7  
1,416  
1,287.3  
1,158.6  
1,029.8  
901.1  
772.4  
643.6  
514.9  
386.2  
257.5  
128.7  
0

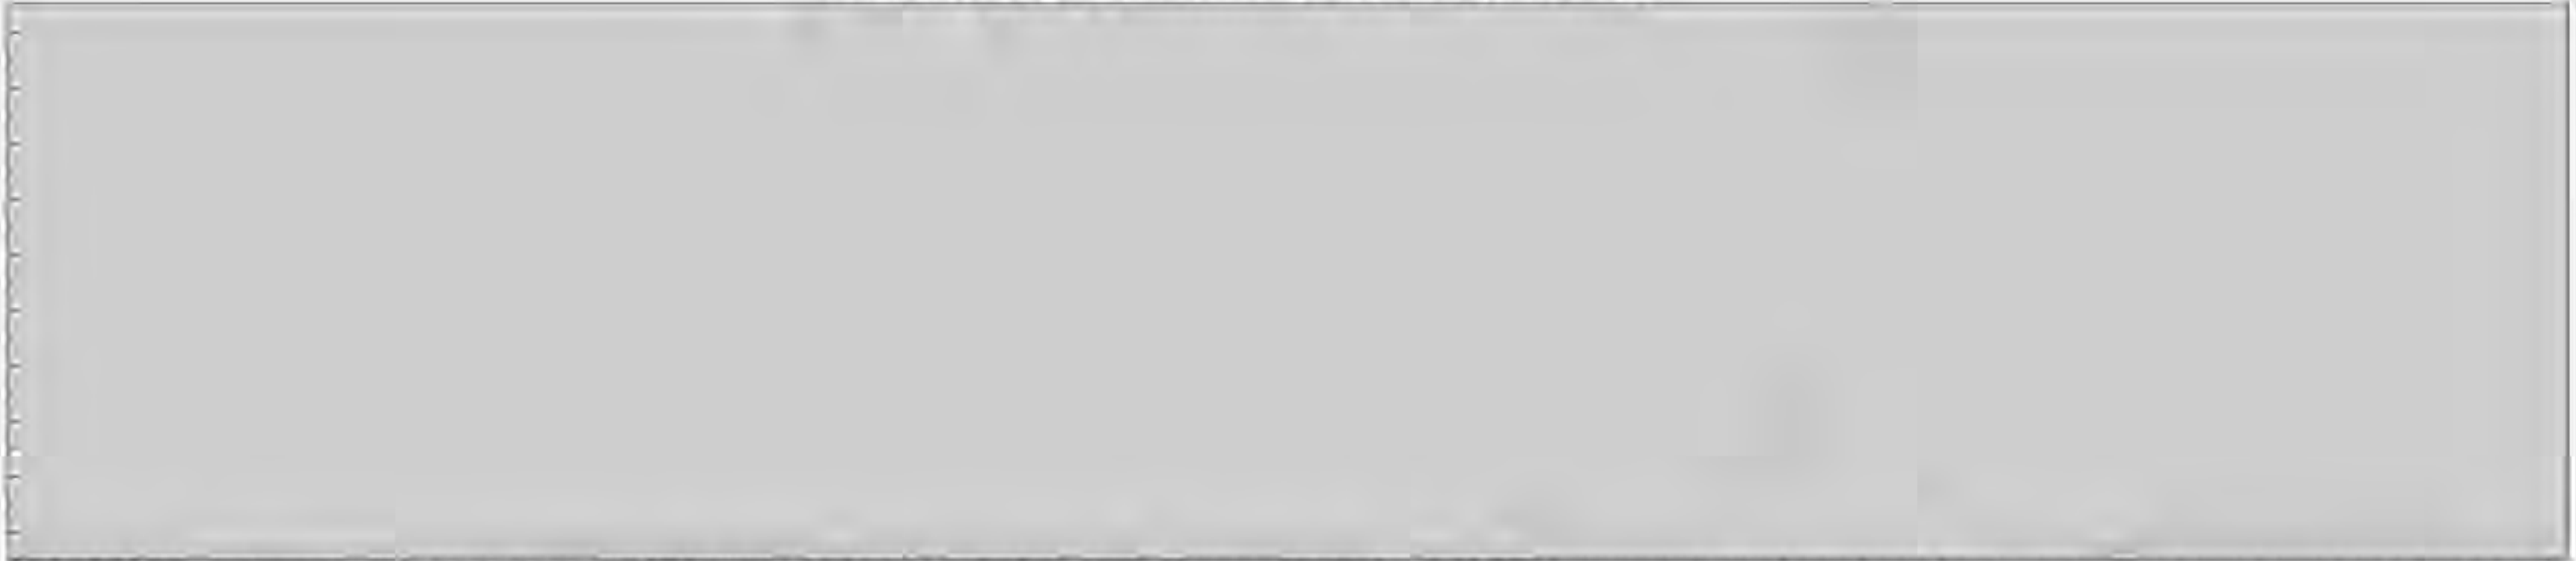

30-NAT GSM289411 CELL  
 29-NAT GSM289410 CELL  
 28-NAT GSM289409 CELL  
 27-NAT GSM289408 CELL  
 26-Color-d9 GSM1988105 CELL  
 25-Color-d9 GSM1988104 CELL  
 24-Color-d9 GSM1988103 CELL  
 23-Color-d4 GSM1988102 CELL  
 22-Color-d4 GSM1988101 CELL  
 21-Intestine-large GSM258676 CELL  
 20-Intestine-large GSM258675 CELL  
 19-Intestine-small GSM258674 CELL  
 18-Intestine-small GSM258673 CELL  
 17-Lymph-nodes GSM258672 CELL  
 16-Spleen GSM258671 CELL  
 15-Spleen GSM258670 CELL  
 14-Neuro2a GSM258669 CELL  
 13-Astrocytes GSM241898 CELL  
 12-mimb GSM258667 CELL  
 11-mimb GSM258666 CELL  
 10-MIMCD3 GSM258665 CELL  
 09-MIMCD3 GSM258664 CELL  
 08-Bruce4 GSM258663 CELL  
 07-Bruce4 GSM258662 CELL  
 06-C2C12 GSM258661 CELL  
 05-NH3T3 GSM258660 CELL  
 04-NH3T3 GSM258659 CELL  
 03-3T3-L1 GSM258658 CELL  
 02-3T3-L1 GSM258657 CELL  
 01-3T3-L1 GSM258656 CELL  
 99-10T12 GSM258655 CELL  
 98-10T12 GSM258654 CELL  
 97-Osteoblast-d21 GSM258653 CELL  
 96-Osteoblast-d21 GSM258652 CELL  
 95-Osteoblast-d14 GSM258651 CELL  
 94-Osteoblast-d14 GSM258650 CELL  
 93-Osteoblast-d5 GSM258649 CELL  
 92-Osteoblast-d5 GSM258648 CELL  
 91-Chondrocytes GSM258647 CELL  
 90-Chondrocytes GSM258646 CELL  
 89-Nat Helper cell GSM465594 CELL  
 88-Nat Helper cell GSM465593 CELL  
 87-LT cell GSM465592 CELL  
 86-MS-1 GSM234692 CELL  
 85-Lymph-endo-cells GSM143704 CELL  
 84-Lymph-endo-cells GSM481977 CELL  
 83-Lymph-endo-cells GSM481978 CELL  
 82-Lymph-endo-cells GSM481979 CELL  
 81-Lymph-endo-cells GSM481980 CELL  
 80-Lymph-endo-cells GSM481981 CELL  
 79-Lymph-endo-cells GSM481982 CELL  
 78-Lymph-endo-cells GSM481983 CELL  
 77-Lymph-endo-cells GSM481984 CELL  
 76-Lymph-endo-cells GSM481985 CELL  
 75-Lymph-endo-cells GSM481986 CELL  
 74-Lymph-endo-cells GSM481987 CELL  
 73-Lymph-endo-cells GSM481988 CELL  
 72-Lymph-endo-cells GSM481989 CELL  
 71-Lymph-endo-cells GSM481990 CELL  
 70-Lymph-endo-cells GSM481991 CELL  
 69-Lymph-endo-cells GSM481992 CELL  
 68-Lymph-endo-cells GSM481993 CELL  
 67-Lymph-endo-cells GSM481994 CELL  
 66-Lymph-endo-cells GSM481995 CELL  
 65-Lymph-endo-cells GSM481996 CELL  
 64-Lymph-endo-cells GSM481997 CELL  
 63-Lymph-endo-cells GSM481998 CELL  
 62-Lymph-endo-cells GSM481999 CELL  
 61-Lymph-endo-cells GSM482000 CELL  
 60-Lymph-endo-cells GSM482001 CELL  
 59-Lymph-endo-cells GSM482002 CELL  
 58-Lymph-endo-cells GSM482003 CELL  
 57-Lymph-endo-cells GSM482004 CELL  
 56-Lymph-endo-cells GSM482005 CELL  
 55-Lymph-endo-cells GSM482006 CELL  
 54-Lymph-endo-cells GSM482007 CELL  
 53-Lymph-endo-cells GSM482008 CELL  
 52-Lymph-endo-cells GSM482009 CELL  
 51-Lymph-endo-cells GSM482010 CELL  
 50-Lymph-endo-cells GSM482011 CELL  
 49-Lymph-endo-cells GSM482012 CELL  
 48-Lymph-endo-cells GSM482013 CELL  
 47-Lymph-endo-cells GSM482014 CELL  
 46-Lymph-endo-cells GSM482015 CELL  
 45-Lymph-endo-cells GSM482016 CELL  
 44-Lymph-endo-cells GSM482017 CELL  
 43-Lymph-endo-cells GSM482018 CELL  
 42-Lymph-endo-cells GSM482019 CELL  
 41-Lymph-endo-cells GSM482020 CELL  
 40-Lymph-endo-cells GSM482021 CELL  
 39-Lymph-endo-cells GSM482022 CELL  
 38-Lymph-endo-cells GSM482023 CELL  
 37-Lymph-endo-cells GSM482024 CELL  
 36-Lymph-endo-cells GSM482025 CELL  
 35-Lymph-endo-cells GSM482026 CELL  
 34-Lymph-endo-cells GSM482027 CELL  
 33-Lymph-endo-cells GSM482028 CELL  
 32-Lymph-endo-cells GSM482029 CELL  
 31-Lymph-endo-cells GSM482030 CELL  
 30-Lymph-endo-cells GSM482031 CELL  
 29-Lymph-endo-cells GSM482032 CELL  
 28-Lymph-endo-cells GSM482033 CELL  
 27-Lymph-endo-cells GSM482034 CELL  
 26-Lymph-endo-cells GSM482035 CELL  
 25-Lymph-endo-cells GSM482036 CELL  
 24-Lymph-endo-cells GSM482037 CELL  
 23-Lymph-endo-cells GSM482038 CELL  
 22-Lymph-endo-cells GSM482039 CELL  
 21-Lymph-endo-cells GSM482040 CELL  
 20-Lymph-endo-cells GSM482041 CELL  
 19-Lymph-endo-cells GSM482042 CELL  
 18-Lymph-endo-cells GSM482043 CELL  
 17-Lymph-endo-cells GSM482044 CELL  
 16-Lymph-endo-cells GSM482045 CELL  
 15-Lymph-endo-cells GSM482046 CELL  
 14-Lymph-endo-cells GSM482047 CELL  
 13-Lymph-endo-cells GSM482048 CELL  
 12-Lymph-endo-cells GSM482049 CELL  
 11-Lymph-endo-cells GSM482050 CELL  
 10-Lymph-endo-cells GSM482051 CELL  
 9-Lymph-endo-cells GSM482052 CELL  
 8-Lymph-endo-cells GSM482053 CELL  
 7-Lymph-endo-cells GSM482054 CELL  
 6-Lymph-endo-cells GSM482055 CELL  
 5-Lymph-endo-cells GSM482056 CELL  
 4-Lymph-endo-cells GSM482057 CELL  
 3-Lymph-endo-cells GSM482058 CELL  
 2-Lymph-endo-cells GSM482059 CELL  
 1-Lymph-endo-cells GSM482060 CELL



Cluster0009\_Low in some Paneth cells (224 nodes)

115.9  
109.8  
103.7  
97.6  
91.5  
85.4  
79.3  
73.2  
67.1  
61  
54.9  
48.8  
42.7  
36.6  
30.5  
24.4  
18.3  
12.2  
6.1  
0

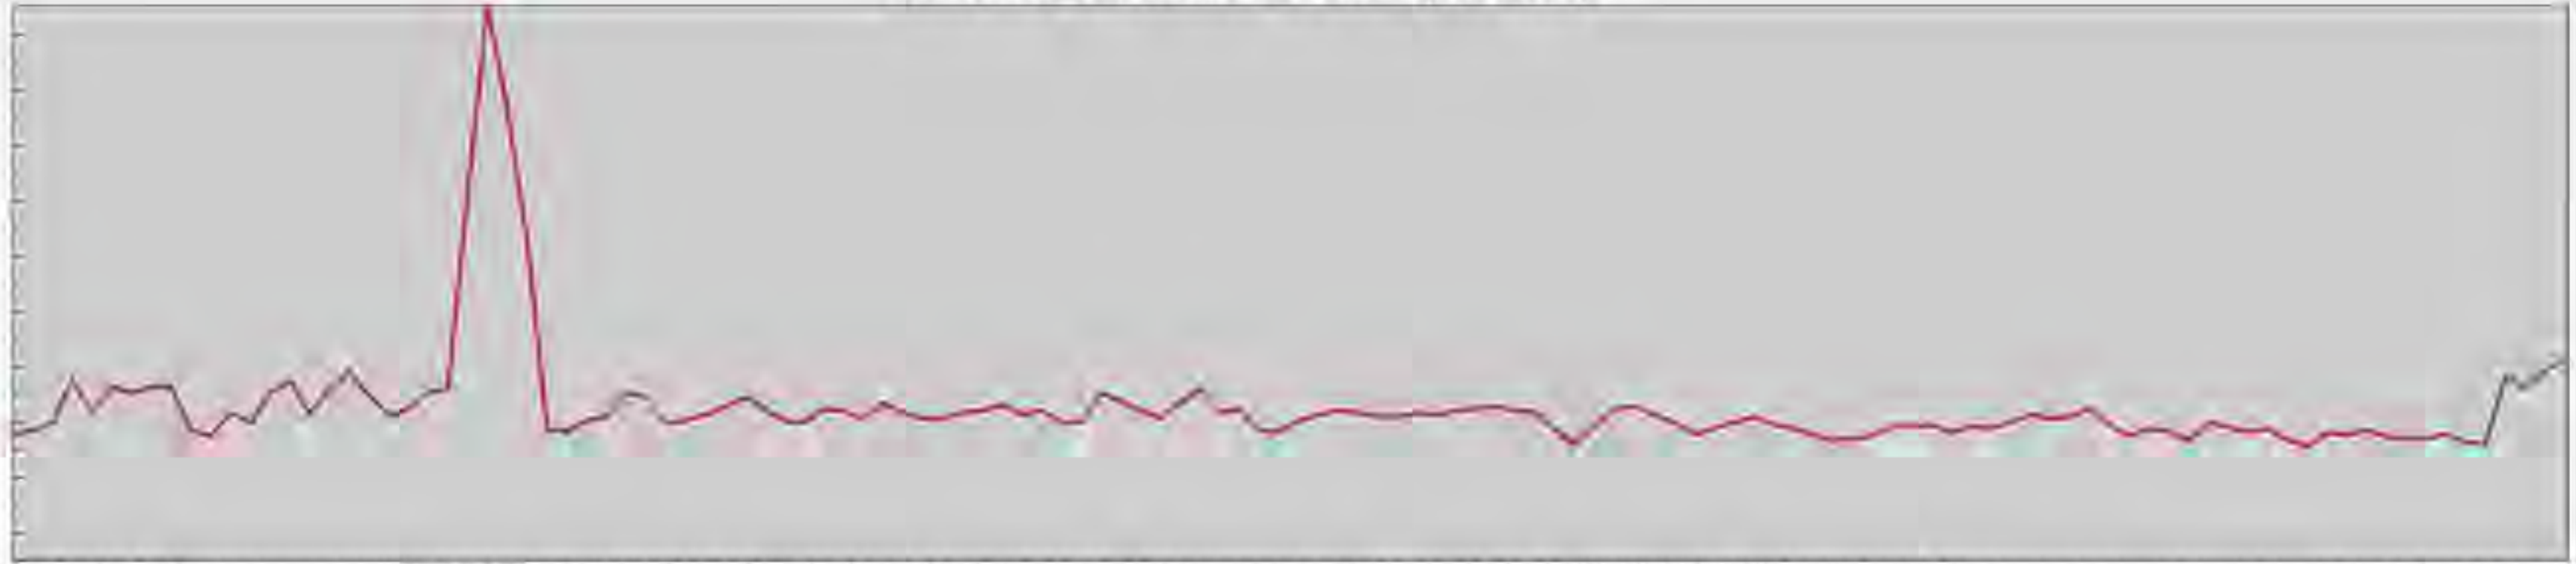

130-NALT GSM289411.CEL  
129-NALT GSM289410.CEL  
128-NALT GSM289409.CEL  
127-NALT GSM289408.CEL  
126-paneth-cells-GF-1 GSM116357.CEL  
125-paneth-cells GSM116350.CEL  
124-paneth-cells GSM116359.CEL  
123-paneth-cells GSM318589.CEL  
122-paneth-cells GSM318590.CEL  
121-paneth-cells GSM480375.CEL  
120-paneth-cells GSM480374.CEL  
119-paneth-cells-GF GSM116358.CEL  
118-paneth-cells-GF GSM116357.CEL  
117-paneth-cells-GF GSM116357.CEL  
116-paneth-cells-GF GSM116357.CEL  
115-paneth-cells-GF GSM116357.CEL  
114-paneth-cells-GF GSM116357.CEL  
113-paneth-cells-GF GSM116357.CEL  
112-paneth-cells-GF GSM116357.CEL  
111-paneth-cells-GF GSM116357.CEL  
110-paneth-cells-GF GSM116357.CEL  
109-paneth-cells-GF GSM116357.CEL  
108-paneth-cells-GF GSM116357.CEL  
107-paneth-cells-GF GSM116357.CEL  
106-paneth-cells-GF GSM116357.CEL  
105-paneth-cells-GF GSM116357.CEL  
104-paneth-cells-GF GSM116357.CEL  
103-paneth-cells-GF GSM116357.CEL  
102-paneth-cells-GF GSM116357.CEL  
101-paneth-cells-GF GSM116357.CEL  
100-paneth-cells-GF GSM116357.CEL  
99-paneth-cells-GF GSM116357.CEL  
98-paneth-cells-GF GSM116357.CEL  
97-paneth-cells-GF GSM116357.CEL  
96-paneth-cells-GF GSM116357.CEL  
95-paneth-cells-GF GSM116357.CEL  
94-paneth-cells-GF GSM116357.CEL  
93-paneth-cells-GF GSM116357.CEL  
92-paneth-cells-GF GSM116357.CEL  
91-paneth-cells-GF GSM116357.CEL  
90-paneth-cells-GF GSM116357.CEL  
89-paneth-cells-GF GSM116357.CEL  
88-paneth-cells-GF GSM116357.CEL  
87-paneth-cells-GF GSM116357.CEL  
86-paneth-cells-GF GSM116357.CEL  
85-paneth-cells-GF GSM116357.CEL  
84-paneth-cells-GF GSM116357.CEL  
83-paneth-cells-GF GSM116357.CEL  
82-paneth-cells-GF GSM116357.CEL  
81-paneth-cells-GF GSM116357.CEL  
80-paneth-cells-GF GSM116357.CEL  
79-paneth-cells-GF GSM116357.CEL  
78-paneth-cells-GF GSM116357.CEL  
77-paneth-cells-GF GSM116357.CEL  
76-paneth-cells-GF GSM116357.CEL  
75-paneth-cells-GF GSM116357.CEL  
74-paneth-cells-GF GSM116357.CEL  
73-paneth-cells-GF GSM116357.CEL  
72-paneth-cells-GF GSM116357.CEL  
71-paneth-cells-GF GSM116357.CEL  
70-paneth-cells-GF GSM116357.CEL  
69-paneth-cells-GF GSM116357.CEL  
68-paneth-cells-GF GSM116357.CEL  
67-paneth-cells-GF GSM116357.CEL  
66-paneth-cells-GF GSM116357.CEL  
65-paneth-cells-GF GSM116357.CEL  
64-paneth-cells-GF GSM116357.CEL  
63-paneth-cells-GF GSM116357.CEL  
62-paneth-cells-GF GSM116357.CEL  
61-paneth-cells-GF GSM116357.CEL  
60-paneth-cells-GF GSM116357.CEL  
59-paneth-cells-GF GSM116357.CEL  
58-paneth-cells-GF GSM116357.CEL  
57-paneth-cells-GF GSM116357.CEL  
56-paneth-cells-GF GSM116357.CEL  
55-paneth-cells-GF GSM116357.CEL  
54-paneth-cells-GF GSM116357.CEL  
53-paneth-cells-GF GSM116357.CEL  
52-paneth-cells-GF GSM116357.CEL  
51-paneth-cells-GF GSM116357.CEL  
50-paneth-cells-GF GSM116357.CEL  
49-paneth-cells-GF GSM116357.CEL  
48-paneth-cells-GF GSM116357.CEL  
47-paneth-cells-GF GSM116357.CEL  
46-paneth-cells-GF GSM116357.CEL  
45-paneth-cells-GF GSM116357.CEL  
44-paneth-cells-GF GSM116357.CEL  
43-paneth-cells-GF GSM116357.CEL  
42-paneth-cells-GF GSM116357.CEL  
41-paneth-cells-GF GSM116357.CEL  
40-paneth-cells-GF GSM116357.CEL  
39-paneth-cells-GF GSM116357.CEL  
38-paneth-cells-GF GSM116357.CEL  
37-paneth-cells-GF GSM116357.CEL  
36-paneth-cells-GF GSM116357.CEL  
35-paneth-cells-GF GSM116357.CEL  
34-paneth-cells-GF GSM116357.CEL  
33-paneth-cells-GF GSM116357.CEL  
32-paneth-cells-GF GSM116357.CEL  
31-paneth-cells-GF GSM116357.CEL  
30-paneth-cells-GF GSM116357.CEL  
29-paneth-cells-GF GSM116357.CEL  
28-paneth-cells-GF GSM116357.CEL  
27-paneth-cells-GF GSM116357.CEL  
26-paneth-cells-GF GSM116357.CEL  
25-paneth-cells-GF GSM116357.CEL  
24-paneth-cells-GF GSM116357.CEL  
23-paneth-cells-GF GSM116357.CEL  
22-paneth-cells-GF GSM116357.CEL  
21-paneth-cells-GF GSM116357.CEL  
20-paneth-cells-GF GSM116357.CEL  
19-paneth-cells-GF GSM116357.CEL  
18-paneth-cells-GF GSM116357.CEL  
17-paneth-cells-GF GSM116357.CEL  
16-paneth-cells-GF GSM116357.CEL  
15-paneth-cells-GF GSM116357.CEL  
14-paneth-cells-GF GSM116357.CEL  
13-paneth-cells-GF GSM116357.CEL  
12-paneth-cells-GF GSM116357.CEL  
11-paneth-cells-GF GSM116357.CEL  
10-paneth-cells-GF GSM116357.CEL  
09-paneth-cells-GF GSM116357.CEL  
08-paneth-cells-GF GSM116357.CEL  
07-paneth-cells-GF GSM116357.CEL  
06-paneth-cells-GF GSM116357.CEL  
05-paneth-cells-GF GSM116357.CEL  
04-paneth-cells-GF GSM116357.CEL  
03-paneth-cells-GF GSM116357.CEL  
02-paneth-cells-GF GSM116357.CEL  
01-paneth-cells-GF GSM116357.CEL



Cluster0010\_Small and large intestine-related (220 nodes)

2,708.6  
2,566  
2,423.6  
2,280.9  
2,138.4  
1,995.8  
1,853.2  
1,710.7  
1,568.1  
1,425.6  
1,283  
1,140.5  
997.9  
855.3  
712.8  
570.2  
427.7  
285.1  
142.6  
0

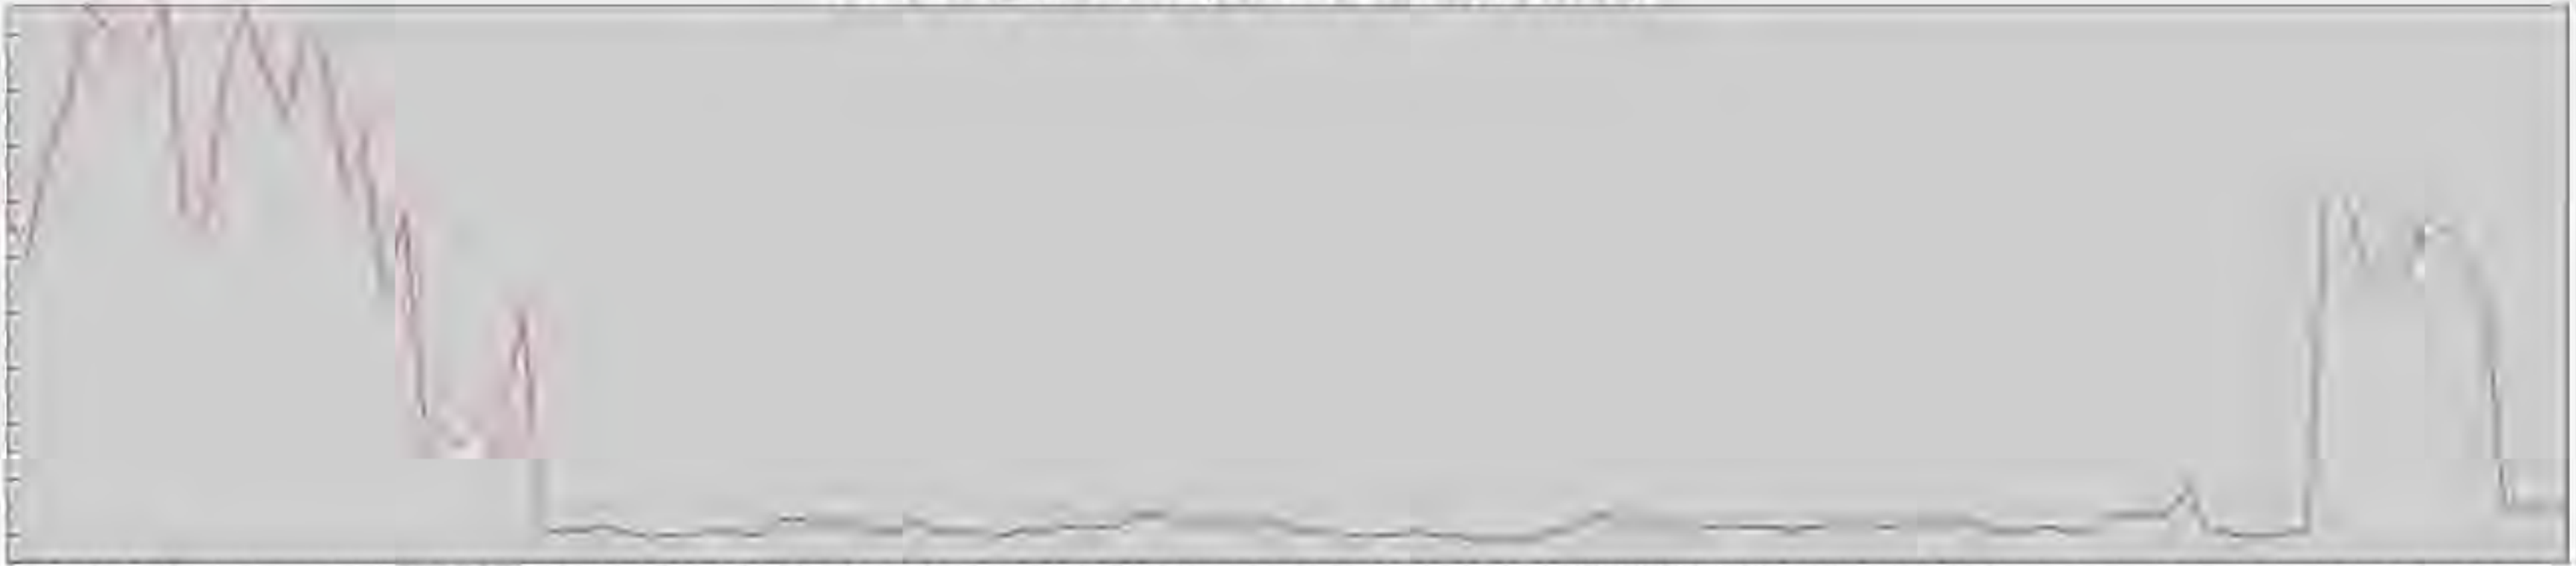

130-NALT GSM289411 CELL  
129-NALT GSM289410 CELL  
128-NALT GSM289409 CELL  
127-NALT GSM289408 CELL  
126-Color-d9 GSM1988105 CELL  
125-Color-d9 GSM1988104 CELL  
124-Color-d9 GSM1988103 CELL  
123-Color-d4 GSM1988102 CELL  
122-Color-d4 GSM1988101 CELL  
121-Intestine-large GSM258676 CELL  
120-Intestine-large GSM258675 CELL  
119-Intestine-small GSM258674 CELL  
118-Intestine-small GSM258673 CELL  
117-Lymph-nodes GSM258672 CELL  
116-Lymph-nodes GSM258671 CELL  
115-Spleen GSM258767 CELL  
114-Spleen GSM258766 CELL  
113-Neuro2a GSM258728 CELL  
112-Neuro2a GSM258727 CELL  
111-Astrocytes GSM241898 CELL  
110-mimb GSM258726 CELL  
109-mimb GSM258725 CELL  
108-MIMCD3 GSM258724 CELL  
107-MIMCD3 GSM258723 CELL  
106-Bruce4 GSM258656 CELL  
105-Bruce4 GSM258655 CELL  
104-C2C12 GSM258690 CELL  
103-C2C12 GSM258689 CELL  
102-NH3T3 GSM258739 CELL  
101-NH3T3 GSM258738 CELL  
100-3T3-L1 GSM258610 CELL  
99-3T3-L1 GSM258609 CELL  
98-10T12 GSM258632 CELL  
97-10T12 GSM258631 CELL  
96-Osteoblast-d21 GSM258740 CELL  
95-Osteoblast-d21 GSM258739 CELL  
94-Osteoblast-d14 GSM258738 CELL  
93-Osteoblast-d14 GSM258737 CELL  
92-Osteoblast-d5 GSM258742 CELL  
91-Osteoblast-d5 GSM258741 CELL  
90-Chondrocytes GSM266741 CELL  
89-Chondrocytes GSM266740 CELL  
88-Nat Helper cell GSM465594 CELL  
87-Nat Helper cell GSM465593 CELL  
86-TT cell GSM465596 CELL  
85-MS-1 GSM234692 CELL  
84-Lymph-endo-cells GSM143704 CELL  
83-P-FDC GSM481977 CELL  
82-P-FDC GSM481978 CELL  
81-P-FDC GSM481976 CELL  
80-F-L-Y RMLNDCC003001 CELL  
79-F-L-Y RMLNDCC003001 CELL  
78-Follicular-Bcells GSM258664 CELL  
77-Follicular-Bcells GSM258663 CELL  
76-MZ-Bcell GSM258627 CELL  
75-MZ-Bcell GSM258627 CELL  
74-BAF3 GSM258620 CELL  
73-BAF3 GSM258619 CELL  
72-Tregs GSM258778 CELL  
71-Tregs GSM258777 CELL  
70-T-cells-CD8+ GSM258776 CELL  
69-T-cells-CD8+ GSM258774 CELL  
68-T-cells-CD4+ GSM258773 CELL  
67-T-cells-CD4+ GSM258744 CELL  
66-Thymocyte-DN GSM465595 CELL  
65-Osteoclasts GSM258743 CELL  
64-Microglia GSM258727 CELL  
63-Microglia GSM258727 CELL  
62-MM-LPS-7h GSM258706 CELL  
61-MM-LPS-7h GSM258706 CELL  
60-MM-LPS-7h GSM258705 CELL  
59-MM-LPS-6h GSM258702 CELL  
58-MM-LPS-6h GSM258701 CELL  
57-MM-LPS-6h GSM258699 CELL  
56-MM-LPS-6h GSM258699 CELL  
55-Plasmacytoid-DC GSM258650 CELL  
54-Plasmacytoid-DC GSM258649 CELL  
53-CD8a-DC GSM258647 CELL  
52-CD8a-DC GSM258647 CELL  
51-CD8a+DC GSM258646 CELL  
50-CD8a+DC GSM258646 CELL  
49-NK-cells GSM258732 CELL  
48-NK-cells GSM258731 CELL  
47-Mast-cells-IgE+Ad GSM258719 CELL  
46-Mast-cells-IgE+Ad GSM258717 CELL  
45-Mast-cells-IgE GSM258714 CELL  
44-Mast-cells-IgE GSM258713 CELL  
43-Mast-cells-IgE GSM258712 CELL  
42-Mast-cells-IgE GSM258712 CELL  
41-Mast-cells GSM258712 CELL  
40-Granulocytes GSM258667 CELL  
39-Granulocytes GSM258666 CELL  
38-GMP GSM258665 CELL  
37-GMP GSM258665 CELL  
36-GMP GSM258642 CELL  
35-GMP GSM258642 CELL  
34-MEP GSM258720 CELL  
33-MEP GSM258719 CELL  
32-MEP GSM258719 CELL  
31-HSC GSM258770 CELL  
30-HSC GSM258769 CELL  
29-Bone marrow GSM258628 CELL  
28-Bone marrow GSM258627 CELL  
27-paneth-cells-GE GSM116358 CELL  
26-paneth-cells-GE GSM116357 CELL  
25-paneth-cells GSM116350 CELL  
24-paneth-cells GSM116359 CELL  
23-paneth-cells GSM318589 CELL  
22-paneth-cells GSM318590 CELL  
21-Color-Crypt GSM480375 CELL  
20-Color-Crypt GSM480374 CELL  
19-Color-Vill GSM480363 CELL  
18-Color-Vill GSM480362 CELL  
17-Color-IEC-GE GSM349880 CELL  
16-Color-IEC-GE GSM350375 CELL  
15-Ileum-IEC GSM350376 CELL  
14-Ileum-IEC GSM350371 CELL  
13-Small-intestine-epithelium RMINEP002901 CELL  
12-Small-intestine-epithelium RMINEP001001 CELL  
11-FAE RMPYEP002001 CELL  
10-FAE RMPYEP001001 CELL  
09-Ileum-IEC GSM190797 CELL  
08-Ileum-IEC GSM190796 CELL  
07-Ileum-IEC GSM190795 CELL  
06-CT-v-M-cells GSM190794 CELL  
05-CT-v-M-cells GSM190793 CELL  
04-PP-M-cells GSM190792 CELL  
03-PP-M-cells GSM190791 CELL  
02-PP-M-cells GSM190790 CELL  
01-PP-M-cells GSM190789 CELL



Cluster0011\_Phagocyte-related (212 nodes)

4,629.4  
4,385.7  
4,142.1  
3,898.4  
3,654.8  
3,411.1  
3,167.5  
2,923.8  
2,680.2  
2,436.6  
2,192.9  
1,949.2  
1,705.6  
1,461.9  
1,218.3  
974.6  
731  
487.3  
243.7  
0

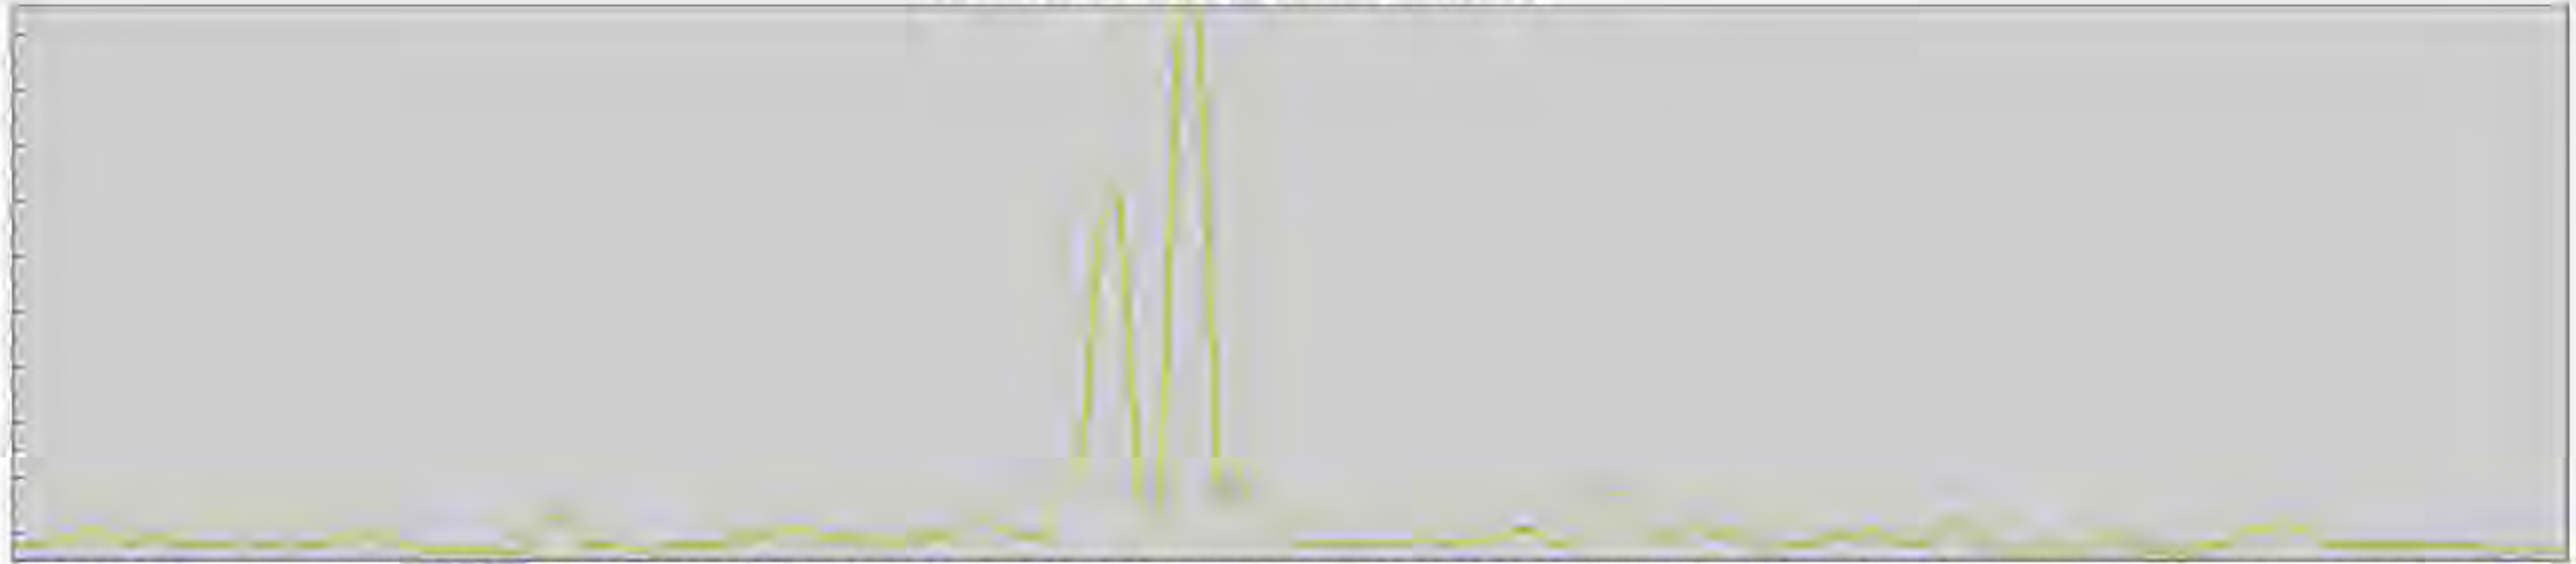

130- NALT GSM2899411 CELL  
 129- NALT GSM2899410 CELL  
 128- NALT GSM2899409 CELL  
 127- NALT GSM2899408 CELL  
 126- Colon-d9 GSM1988105 CELL  
 125- Colon-d9 GSM1988104 CELL  
 124- Colon-d9 GSM1988103 CELL  
 123- Colon-d4 GSM1988102 CELL  
 122- Colon-d4 GSM1988101 CELL  
 121- Intestine-large GSM258676 CELL  
 120- Intestine-large GSM258675 CELL  
 119- Intestine-small GSM258674 CELL  
 118- Intestine-small GSM258673 CELL  
 117- Lymph-nodes GSM258672 CELL  
 116- Lymph-nodes GSM258671 CELL  
 115- Spleen GSM258767 CELL  
 114- Spleen GSM258766 CELL  
 113- Neuro2a GSM258728 CELL  
 112- Neuro2a GSM258727 CELL  
 111- Astrocytes GSM241898 CELL  
 110- mimb GSM258726 CELL  
 109- mimb GSM258725 CELL  
 108- MIMCD3 GSM258724 CELL  
 107- MIMCD3 GSM258723 CELL  
 106- Bruce4 GSM258665 CELL  
 105- Bruce4 GSM258664 CELL  
 104- C2C12 GSM258690 CELL  
 103- C2C12 GSM258689 CELL  
 102- NIH3T3 GSM258739 CELL  
 101- NIH3T3 GSM258738 CELL  
 100- 3T3-L1 GSM258610 CELL  
 99- 3T3-L1 GSM258609 CELL  
 98- 10T1/2 GSM258632 CELL  
 97- 10T1/2 GSM258631 CELL  
 96- Osteoblast-d21 GSM258740 CELL  
 95- Osteoblast-d21 GSM258739 CELL  
 94- Osteoblast-d14 GSM258738 CELL  
 93- Osteoblast-d14 GSM258737 CELL  
 92- Osteoblast-d5 GSM258742 CELL  
 91- Osteoblast-d5 GSM258741 CELL  
 90- Chondrocytes GSM266741 CELL  
 89- Chondrocytes GSM266740 CELL  
 88- Nat Helper cell GSM465594 CELL  
 87- Nat Helper cell GSM465593 CELL  
 86- T cell GSM465596 CELL  
 85- MS-1 GSM234692 CELL  
 84- Lymph-endo-cells GSM143704 CELL  
 83- P-FDC GSM481977 CELL  
 82- P-FDC GSM481978 CELL  
 81- P-FDC GSM481976 CELL  
 80- F-L Y RMLNDCC003001 CELL  
 79- F-L Y RMLNDCC003001 CELL  
 78- Follicular-B-cells GSM258664 CELL  
 77- Follicular-B-cells GSM258663 CELL  
 76- MZ-Bcell GSM258627 CELL  
 75- MZ-Bcell GSM258627 CELL  
 74- BAF3 GSM258620 CELL  
 73- BAF3 GSM258619 CELL  
 72- Tregs GSM258778 CELL  
 71- Tregs GSM258777 CELL  
 70- T-cells-CD8+ GSM258776 CELL  
 69- T-cells-CD8+ GSM258774 CELL  
 68- T-cells-CD4+ GSM258773 CELL  
 67- T-cells-CD4+ GSM258744 CELL  
 66- Thymocyte-DN GSM465595 CELL  
 65- Osteoclasts GSM258743 CELL  
 64- Microglia GSM258721 CELL  
 63- Microglia GSM258721 CELL  
 62- MM-LPS-7h GSM258706 CELL  
 61- MM-LPS-7h GSM258706 CELL  
 60- MM-LPS-6h GSM258702 CELL  
 59- MM-LPS-6h GSM258701 CELL  
 58- MM-LPS-6h GSM258699 CELL  
 57- MM-LPS-6h GSM258699 CELL  
 56- MM-LPS-6h GSM258694 CELL  
 55- MM-LPS-6h GSM258694 CELL  
 54- MM-LPS-6h GSM258694 CELL  
 53- Plasmacytoid-DC GSM258650 CELL  
 52- Plasmacytoid-DC GSM258649 CELL  
 51- CD8a-DC GSM258648 CELL  
 50- CD8a-DC GSM258647 CELL  
 49- CD8a+DC GSM258646 CELL  
 48- CD8a+DC GSM258646 CELL  
 47- NK-cells GSM258732 CELL  
 46- NK-cells GSM258731 CELL  
 45- Mast-cells-IgE+Ad GSM258719 CELL  
 44- Mast-cells-IgE+Ad GSM258717 CELL  
 43- Mast-cells-IgE GSM258714 CELL  
 42- Mast-cells-IgE GSM258713 CELL  
 41- Mast-cells GSM258712 CELL  
 40- Granulocytes GSM258667 CELL  
 39- Granulocytes GSM258667 CELL  
 38- GMP GSM258666 CELL  
 37- GMP GSM258665 CELL  
 36- GMP GSM258665 CELL  
 35- CMP GSM258642 CELL  
 34- CMP GSM258642 CELL  
 33- MIEP GSM258720 CELL  
 32- MIEP GSM258719 CELL  
 31- HESC GSM258770 CELL  
 30- HESC GSM258769 CELL  
 29- Bone marrow GSM258628 CELL  
 28- Bone marrow GSM258627 CELL  
 27- Paneth-cells-GF-1 GSM116358 CELL  
 26- Paneth-cells-GF-1 GSM116357 CELL  
 25- Paneth-cells GSM116350 CELL  
 24- Paneth-cells GSM116359 CELL  
 23- Paneth-cells GSM318589 CELL  
 22- Paneth-cells GSM318590 CELL  
 21- Colon-Crypt GSM480375 CELL  
 20- Colon-Crypt GSM480374 CELL  
 19- Colon-Vill GSM480363 CELL  
 18- Colon-Vill GSM480362 CELL  
 17- Colon-IEC-GF GSM349880 CELL  
 16- Colon-IEC-GF GSM350375 CELL  
 15- Ileum-IEC-GF GSM350376 CELL  
 14- Ileum-IEC GSM350371 CELL  
 13- Small-intestine-epithelium RMINEP002001 CELL  
 12- Small-intestine-epithelium RMINEP001001 CELL  
 11- FAE RMPYEP002001 CELL  
 10- FAE RMPYEP001001 CELL  
 09- Ileum-IEC GSM190797 CELL  
 08- Ileum-IEC GSM190796 CELL  
 07- Ileum-IEC GSM190795 CELL  
 06- CT-v-M-cells GSM190794 CELL  
 05- CT-v-M-cells GSM190793 CELL  
 04- PP-M-cells GSM190792 CELL  
 03- PP-M-cells GSM190791 CELL  
 02- PP-M-cells GSM190790 CELL  
 01- PP-M-cells GSM190789 CELL



Cluster0012\_High in Bruce 4 embryonic stem cells (202 nodes)

1,153.2  
1,092.5  
1,031.8  
971.1  
910.4  
849.7  
789.1  
728.4  
667.7  
607  
546.3  
485.6  
424.9  
364.2  
303.5  
242.8  
182.1  
121.4  
60.7  
0

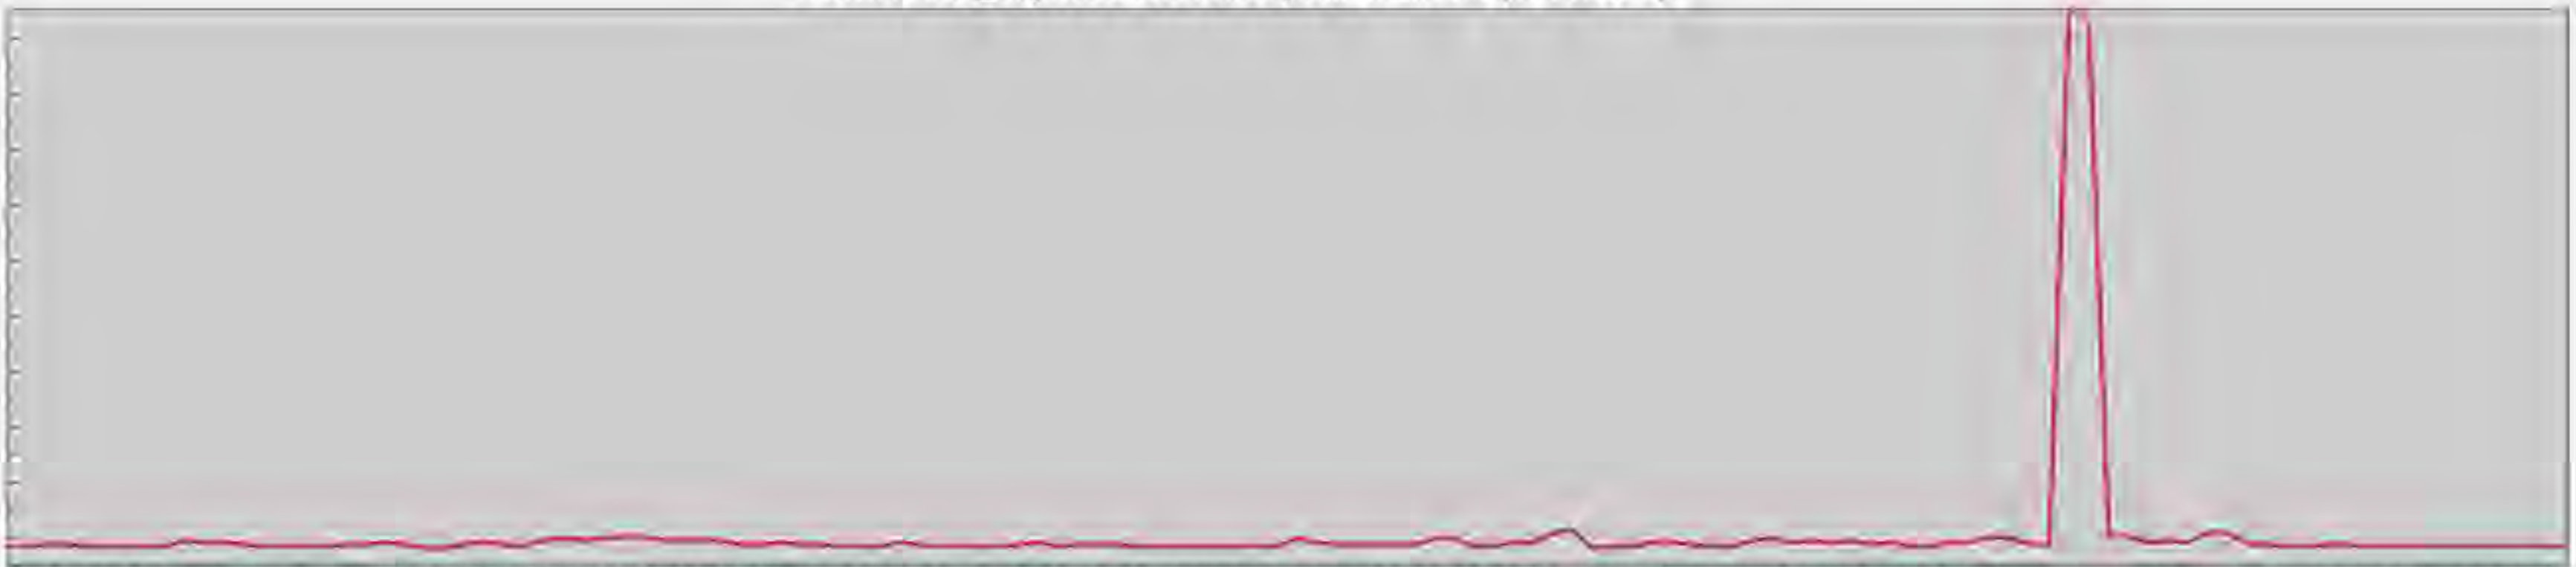

30-NALT GSM289411 CELL  
29-NALT GSM289410 CELL  
28-NALT GSM289409 CELL  
27-NALT GSM289408 CELL  
26-NALT GSM289407 CELL  
25-NALT GSM289406 CELL  
24-NALT GSM289405 CELL  
23-NALT GSM289404 CELL  
22-NALT GSM289403 CELL  
21-NALT GSM289402 CELL  
20-NALT GSM289401 CELL  
19-NALT GSM289400 CELL  
18-NALT GSM289399 CELL  
17-NALT GSM289398 CELL  
16-NALT GSM289397 CELL  
15-NALT GSM289396 CELL  
14-NALT GSM289395 CELL  
13-NALT GSM289394 CELL  
12-NALT GSM289393 CELL  
11-NALT GSM289392 CELL  
10-NALT GSM289391 CELL  
9-NALT GSM289390 CELL  
8-NALT GSM289389 CELL  
7-NALT GSM289388 CELL  
6-NALT GSM289387 CELL  
5-NALT GSM289386 CELL  
4-NALT GSM289385 CELL  
3-NALT GSM289384 CELL  
2-NALT GSM289383 CELL  
1-NALT GSM289382 CELL  
0-NALT GSM289381 CELL  
30-NALT GSM289380 CELL  
29-NALT GSM289379 CELL  
28-NALT GSM289378 CELL  
27-NALT GSM289377 CELL  
26-NALT GSM289376 CELL  
25-NALT GSM289375 CELL  
24-NALT GSM289374 CELL  
23-NALT GSM289373 CELL  
22-NALT GSM289372 CELL  
21-NALT GSM289371 CELL  
20-NALT GSM289370 CELL  
19-NALT GSM289369 CELL  
18-NALT GSM289368 CELL  
17-NALT GSM289367 CELL  
16-NALT GSM289366 CELL  
15-NALT GSM289365 CELL  
14-NALT GSM289364 CELL  
13-NALT GSM289363 CELL  
12-NALT GSM289362 CELL  
11-NALT GSM289361 CELL  
10-NALT GSM289360 CELL  
9-NALT GSM289359 CELL  
8-NALT GSM289358 CELL  
7-NALT GSM289357 CELL  
6-NALT GSM289356 CELL  
5-NALT GSM289355 CELL  
4-NALT GSM289354 CELL  
3-NALT GSM289353 CELL  
2-NALT GSM289352 CELL  
1-NALT GSM289351 CELL  
0-NALT GSM289350 CELL  
30-NALT GSM289349 CELL  
29-NALT GSM289348 CELL  
28-NALT GSM289347 CELL  
27-NALT GSM289346 CELL  
26-NALT GSM289345 CELL  
25-NALT GSM289344 CELL  
24-NALT GSM289343 CELL  
23-NALT GSM289342 CELL  
22-NALT GSM289341 CELL  
21-NALT GSM289340 CELL  
20-NALT GSM289339 CELL  
19-NALT GSM289338 CELL  
18-NALT GSM289337 CELL  
17-NALT GSM289336 CELL  
16-NALT GSM289335 CELL  
15-NALT GSM289334 CELL  
14-NALT GSM289333 CELL  
13-NALT GSM289332 CELL  
12-NALT GSM289331 CELL  
11-NALT GSM289330 CELL  
10-NALT GSM289329 CELL  
9-NALT GSM289328 CELL  
8-NALT GSM289327 CELL  
7-NALT GSM289326 CELL  
6-NALT GSM289325 CELL  
5-NALT GSM289324 CELL  
4-NALT GSM289323 CELL  
3-NALT GSM289322 CELL  
2-NALT GSM289321 CELL  
1-NALT GSM289320 CELL  
0-NALT GSM289319 CELL  
30-NALT GSM289318 CELL  
29-NALT GSM289317 CELL  
28-NALT GSM289316 CELL  
27-NALT GSM289315 CELL  
26-NALT GSM289314 CELL  
25-NALT GSM289313 CELL  
24-NALT GSM289312 CELL  
23-NALT GSM289311 CELL  
22-NALT GSM289310 CELL  
21-NALT GSM289309 CELL  
20-NALT GSM289308 CELL  
19-NALT GSM289307 CELL  
18-NALT GSM289306 CELL  
17-NALT GSM289305 CELL  
16-NALT GSM289304 CELL  
15-NALT GSM289303 CELL  
14-NALT GSM289302 CELL  
13-NALT GSM289301 CELL  
12-NALT GSM289300 CELL  
11-NALT GSM289299 CELL  
10-NALT GSM289298 CELL  
9-NALT GSM289297 CELL  
8-NALT GSM289296 CELL  
7-NALT GSM289295 CELL  
6-NALT GSM289294 CELL  
5-NALT GSM289293 CELL  
4-NALT GSM289292 CELL  
3-NALT GSM289291 CELL  
2-NALT GSM289290 CELL  
1-NALT GSM289289 CELL  
0-NALT GSM289288 CELL



Cluster0013\_Mesenchyme-related/extracellular matrix (181 nodes)

3,757.6  
 3,559.8  
 3,362  
 3,164.3  
 2,966.6  
 2,768.7  
 2,571  
 2,373.2  
 2,175.4  
 1,977.7  
 1,779.9  
 1,582.1  
 1,384.4  
 1,186.6  
 988.8  
 791.1  
 593.3  
 395.5  
 197.8  
 0

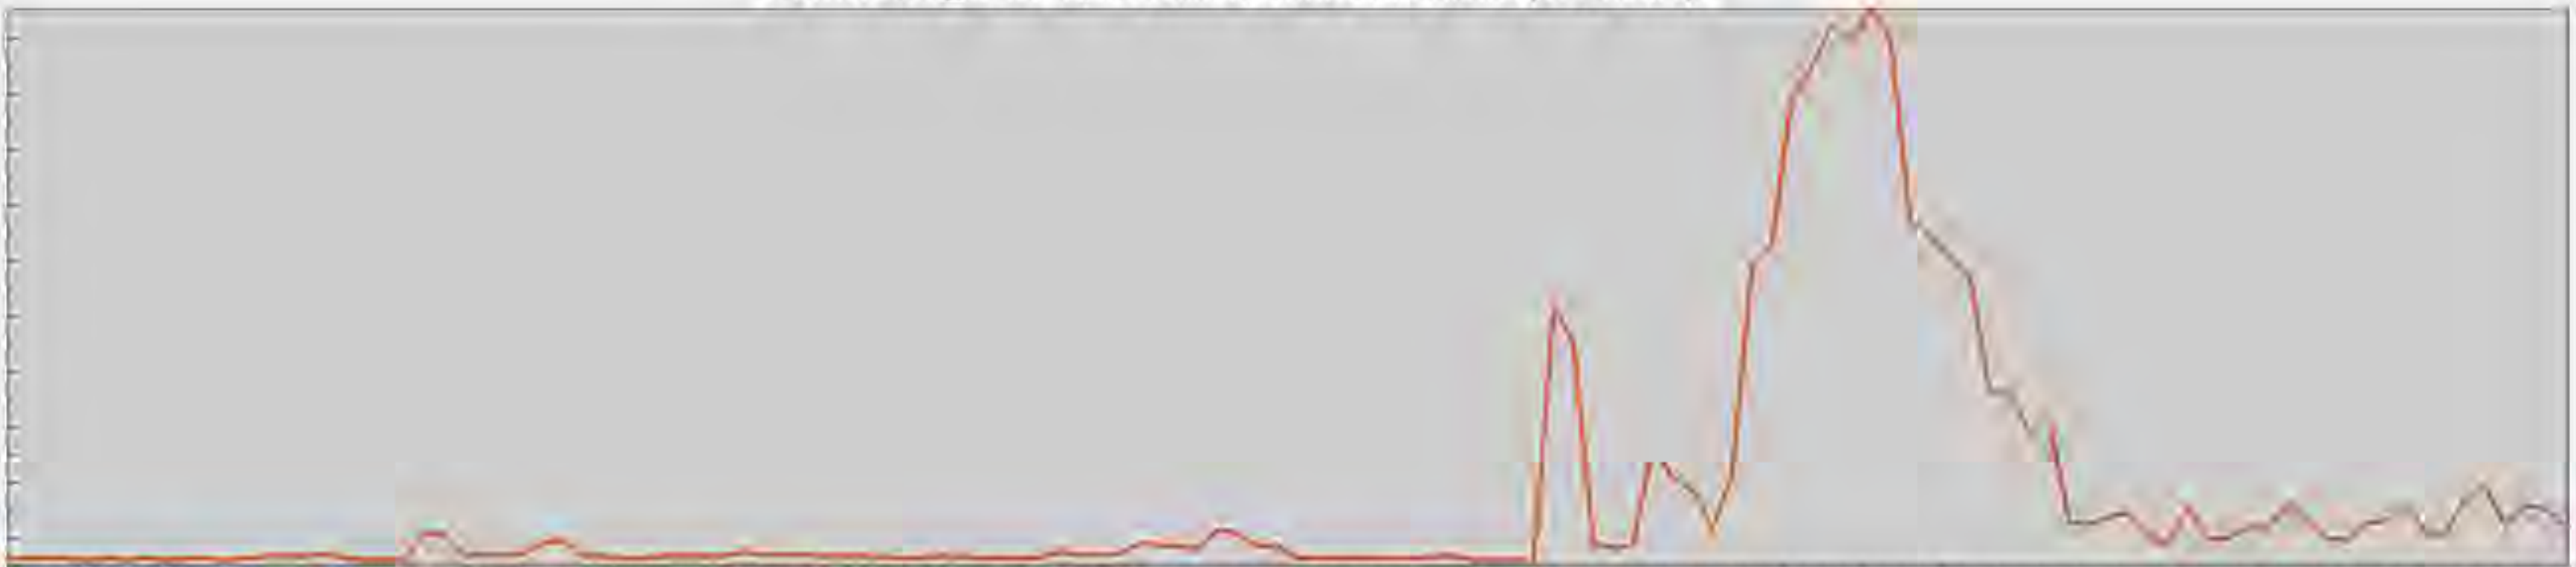

130-NALT GSM289411.CELL  
 129-NALT GSM289410.CELL  
 128-NALT GSM289409.CELL  
 127-NALT GSM289408.CELL  
 126-Colon-d9 GSM1988105.CELL  
 125-Colon-d9 GSM1988104.CELL  
 124-Colon-d9 GSM1988103.CELL  
 123-Colon-d4 GSM1988102.CELL  
 122-Colon-d4 GSM1988101.CELL  
 121-Intestine-large GSM258676.CELL  
 120-Intestine-large GSM258675.CELL  
 119-Intestine-small GSM258678.CELL  
 118-Intestine-small GSM258692.CELL  
 117-Lymph-nodes GSM258691.CELL  
 116-Lymph-nodes GSM258768.CELL  
 115-Spleen GSM258767.CELL  
 114-Spleen GSM258766.CELL  
 113-Neuro2a GSM258728.CELL  
 112-Neuro2a GSM258727.CELL  
 111-Astrocytes GSM241898.CELL  
 110-mim6 GSM258726.CELL  
 109-mim6 GSM258725.CELL  
 108-MIMCD3 GSM258724.CELL  
 107-MIMCD3 GSM258723.CELL  
 106-Bruce4 GSM258656.CELL  
 105-Bruce4 GSM258655.CELL  
 104-C2C12 GSM258690.CELL  
 103-C2C12 GSM258689.CELL  
 102-NH3T3 GSM258739.CELL  
 101-NH3T3 GSM258738.CELL  
 100-3T3-L1 GSM258610.CELL  
 99-3T3-L1 GSM258609.CELL  
 98-10T12 GSM258632.CELL  
 97-10T12 GSM258631.CELL  
 96-Osteoblast-d21 GSM258740.CELL  
 95-Osteoblast-d21 GSM258739.CELL  
 94-Osteoblast-d14 GSM258738.CELL  
 93-Osteoblast-d14 GSM258737.CELL  
 92-Osteoblast-d5 GSM258742.CELL  
 91-Osteoblast-d5 GSM258741.CELL  
 90-Chondrocytes GSM266741.CELL  
 89-Chondrocytes GSM266740.CELL  
 88-Nat Helper cell GSM465594.CELL  
 87-Nat Helper cell GSM465593.CELL  
 86-TT cell GSM465596.CELL  
 85-MS-1 GSM234692.CELL  
 84-Lymph-endo-cells GSM143704.CELL  
 83-PP-FDC GSM481977.CELL  
 82-PP-FDC GSM481978.CELL  
 81-PP-FDC GSM481976.CELL  
 80-LY-RMLNDCC003001.CELL  
 79-LY-RMLNDCC003001.CELL  
 78-Follicular-Bcells GSM258664.CELL  
 77-Follicular-Bcells GSM258663.CELL  
 76-MZ-Bcell GSM258627.CELL  
 75-MZ-Bcell GSM258621.CELL  
 74-BAF3 GSM258620.CELL  
 73-BAF3 GSM258619.CELL  
 72-Tregs GSM258778.CELL  
 71-Tregs GSM258777.CELL  
 70-T-cells-CD8+ GSM258776.CELL  
 69-T-cells-CD8+ GSM258775.CELL  
 68-T-cells-CD4+ GSM258774.CELL  
 67-T-cells-CD4+ GSM258773.CELL  
 66-Thymocyte-DN GSM465595.CELL  
 65-Osteoclasts GSM258744.CELL  
 64-Osteoclasts GSM258743.CELL  
 63-Microglia GSM258721.CELL  
 62-Microglia GSM258721.CELL  
 61-PM-M-PS-7h GSM258706.CELL  
 60-PM-M-PS-7h GSM258705.CELL  
 59-PM-M-PS-6h GSM258702.CELL  
 58-PM-M-PS-6h GSM258701.CELL  
 57-BMM-LPS-6h GSM258699.CELL  
 56-BMM-LPS-6h GSM258699.CELL  
 55-BMM-LPS-6h GSM258694.CELL  
 54-BMM-LPS-6h GSM258694.CELL  
 53-Plasmacytoid-DC GSM258650.CELL  
 52-CD8a-DC GSM258649.CELL  
 51-CD8a-DC GSM258647.CELL  
 50-CD8a-DC GSM258647.CELL  
 49-CD8a+DC GSM258646.CELL  
 48-CD8a+DC GSM258646.CELL  
 47-NK-cells GSM258732.CELL  
 46-NK-cells GSM258731.CELL  
 45-Mast-cells-IgE+Ad GSM258718.CELL  
 44-Mast-cells-IgE+Ad GSM258717.CELL  
 43-Mast-cells-IgE GSM258714.CELL  
 42-Mast-cells-IgE GSM258713.CELL  
 41-Mast-cells GSM258712.CELL  
 40-Granulocytes GSM258668.CELL  
 39-Granulocytes GSM258667.CELL  
 38-GMP GSM258666.CELL  
 37-GMP GSM258666.CELL  
 36-GMP GSM258665.CELL  
 35-GMP GSM258664.CELL  
 34-MEP GSM2588720.CELL  
 33-MEP GSM2588719.CELL  
 32-MEP GSM2588719.CELL  
 31-HSC GSM2588770.CELL  
 30-HSC GSM2588769.CELL  
 29-Bone marrow GSM258828.CELL  
 28-Bone marrow GSM258827.CELL  
 27-paneth-cells-GE GSM116357.CELL  
 26-paneth-cells-GE GSM116357.CELL  
 25-paneth-cells GSM116350.CELL  
 24-paneth-cells GSM116359.CELL  
 23-paneth-cells GSM318589.CELL  
 22-paneth-cells GSM318590.CELL  
 21-Colon-Crypt GSM480375.CELL  
 20-Colon-Crypt GSM480374.CELL  
 19-Colon-Vill GSM480363.CELL  
 18-Colon-Vill GSM480362.CELL  
 17-Colon-IEC-GE GSM349880.CELL  
 16-Colon-IEC-GE GSM350375.CELL  
 15-Ileum-IEC GSM350371.CELL  
 14-Ileum-IEC GSM350371.CELL  
 13-Small-intestine-epithelium RMINEP002001.CELL  
 12-Small-intestine-epithelium RMINEP001001.CELL  
 11-FAE-RMPYEP001001.CELL  
 10-FAE-RMPYEP001001.CELL  
 09-Ileum-IEC GSM190797.CELL  
 08-Ileum-IEC GSM190796.CELL  
 07-Ileum-IEC GSM190795.CELL  
 06-CT-v-M-cells GSM190794.CELL  
 05-CT-v-M-cells GSM190793.CELL  
 04-PP-M-cells GSM190792.CELL  
 03-PP-M-cells GSM190791.CELL  
 02-PP-M-cells GSM190790.CELL  
 01-PP-M-cells GSM190789.CELL



Cluster0014\_High in bone marrow (180 nodes)

3,967.4  
3,758.6  
3,549.8  
3,340.9  
3,132.1  
2,923.3  
2,714.5  
2,505.7  
2,296.9  
2,088.1  
1,879.3  
1,670.5  
1,461.7  
1,252.9  
1,044  
835.2  
626.4  
417.8  
208.8  
0

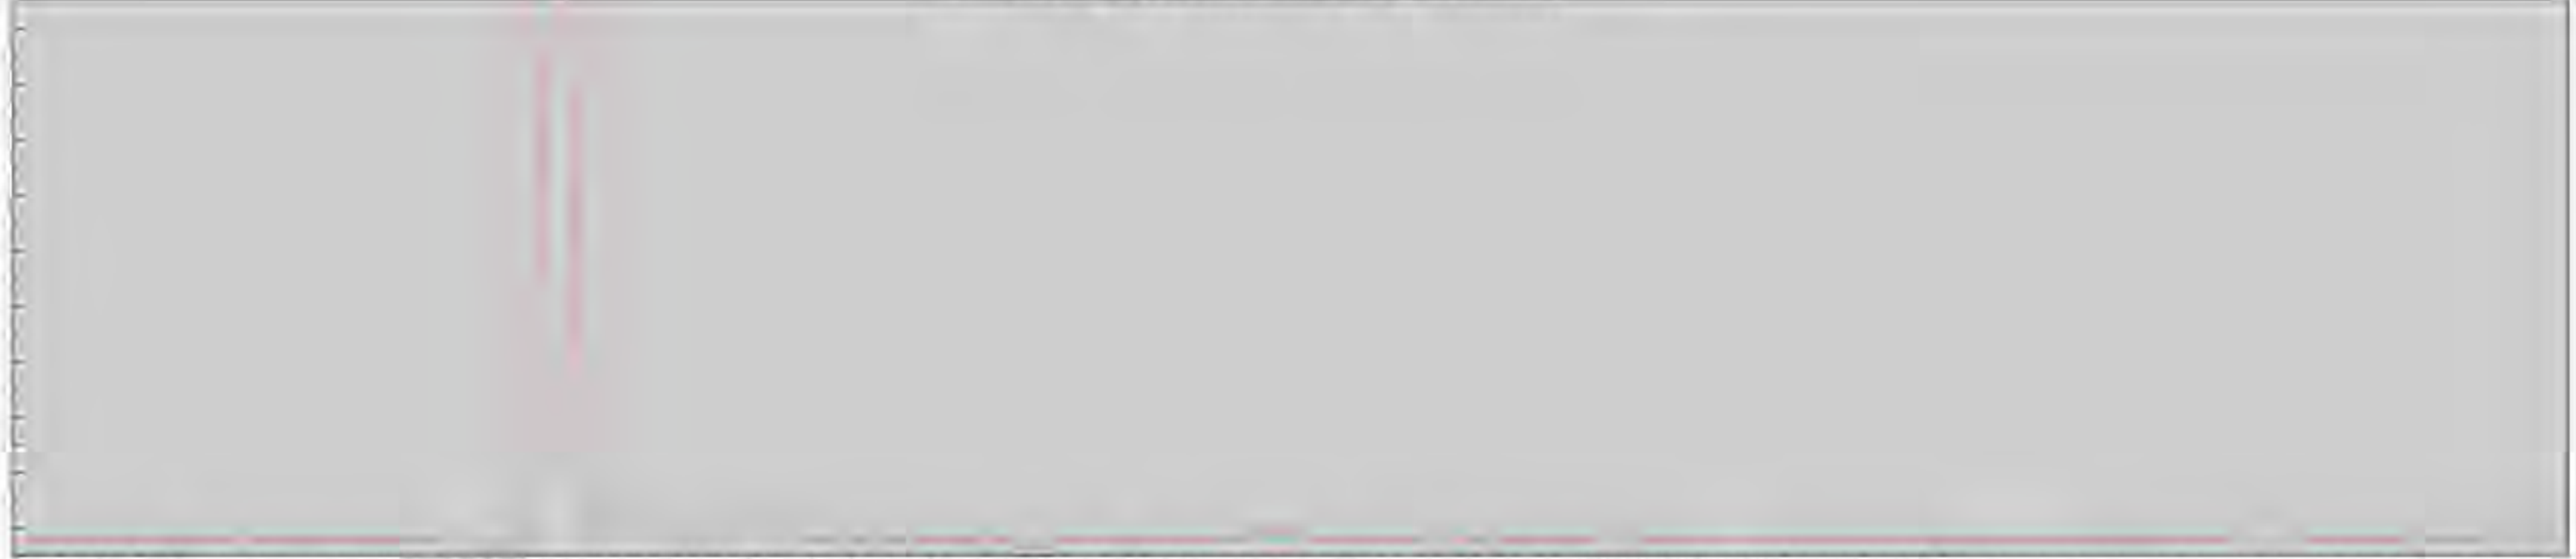

30-NALT GSM289411 CEL  
 129-NALT GSM289410 CEL  
 128-NALT GSM289409 CEL  
 127-NALT GSM289408 CEL  
 126-Color-d9 GSM1988105 CEL  
 125-Color-d9 GSM1988104 CEL  
 124-Color-d9 GSM1988103 CEL  
 123-Color-d4 GSM1988102 CEL  
 122-Color-d4 GSM1988101 CEL  
 121-Intestine-large GSM258676 CEL  
 120-Intestine-large GSM258675 CEL  
 119-Intestine-small GSM258674 CEL  
 118-Intestine-small GSM258673 CEL  
 117-Lymph-nodes GSM258672 CEL  
 116-Spleen GSM258671 CEL  
 115-Spleen GSM258670 CEL  
 114-Spleen GSM258669 CEL  
 113-Neuro2a GSM241898 CEL  
 112-Neuro2a GSM241897 CEL  
 111-Astrocytes GSM241896 CEL  
 110-mimb GSM258726 CEL  
 109-mimb GSM258725 CEL  
 108-MIMCD3 GSM258724 CEL  
 107-MIMCD3 GSM258723 CEL  
 106-Bruce4 GSM258656 CEL  
 105-Bruce4 GSM258655 CEL  
 104-C2C12 GSM258654 CEL  
 103-C2C12 GSM258653 CEL  
 102-NH3T3 GSM258739 CEL  
 101-NH3T3 GSM258738 CEL  
 100-3T3-L1 GSM258610 CEL  
 99-3T3-L1 GSM258609 CEL  
 98-10T12 GSM258632 CEL  
 97-10T12 GSM258631 CEL  
 96-Osteoblast-d21 GSM258740 CEL  
 95-Osteoblast-d21 GSM258739 CEL  
 94-Osteoblast-d14 GSM258738 CEL  
 93-Osteoblast-d14 GSM258737 CEL  
 92-Osteoblast-d5 GSM258742 CEL  
 91-Osteoblast-d5 GSM258741 CEL  
 90-Chondrocytes GSM266741 CEL  
 89-Chondrocytes GSM266740 CEL  
 88-Nat Helper cell GSM465594 CEL  
 87-Nat Helper cell GSM465593 CEL  
 86-TT cell GSM465596 CEL  
 85-MS-1 GSM234692 CEL  
 84-Lymph-endo-cells GSM143704 CEL  
 83-PP-FDC GSM481977 CEL  
 82-PP-FDC GSM481978 CEL  
 81-PP-FDC GSM481976 CEL  
 80-LY RMLNDCC003001 CEL  
 79-LY RMLNDCC003001 CEL  
 78-Follicular-Bcells GSM258664 CEL  
 77-Follicular-Bcells GSM258663 CEL  
 76-MZ-Bcell GSM258627 CEL  
 75-MZ-Bcell GSM258627 CEL  
 74-BAF3 GSM258620 CEL  
 73-BAF3 GSM258619 CEL  
 72-Tregs GSM258778 CEL  
 71-Tregs GSM258777 CEL  
 70-T-cells-CD8+ GSM258776 CEL  
 69-T-cells-CD8+ GSM258774 CEL  
 68-T-cells-CD4+ GSM258773 CEL  
 67-T-cells-CD4+ GSM258773 CEL  
 66-Thymocyte-DN GSM465595 CEL  
 65-Osteoclasts GSM258743 CEL  
 64-Osteoclasts GSM258743 CEL  
 63-Microglia GSM258721 CEL  
 62-Microglia GSM258721 CEL  
 61-MM-LPS-7h GSM268706 CEL  
 60-MM-LPS-7h GSM268705 CEL  
 59-MM-LPS-6h GSM258702 CEL  
 58-MM-LPS-6h GSM258702 CEL  
 57-MM-LPS-6h GSM258699 CEL  
 56-MM-LPS-6h GSM258699 CEL  
 55-MM-LPS-6h GSM258694 CEL  
 54-MM-LPS-6h GSM258694 CEL  
 53-Ismacryoid-DC GSM258650 CEL  
 52-Ismacryoid-DC GSM258649 CEL  
 51-CD8a-DC GSM258647 CEL  
 50-CD8a-DC GSM258647 CEL  
 49-CD8a+DC GSM258646 CEL  
 48-CD8a+DC GSM258646 CEL  
 47-NK-cells GSM258732 CEL  
 46-NK-cells GSM258732 CEL  
 45-Mast-cells-IgE+Ad GSM258718 CEL  
 44-Mast-cells-IgE+Ad GSM258717 CEL  
 43-Mast-cells-IgE GSM258714 CEL  
 42-Mast-cells-IgE GSM258713 CEL  
 41-Mast-cells GSM258712 CEL  
 40-Granulocytes GSM258712 CEL  
 39-Granulocytes GSM258667 CEL  
 38-MP GSM258666 CEL  
 37-MP GSM258665 CEL  
 36-MP GSM258665 CEL  
 35-MP GSM258642 CEL  
 34-MP GSM258642 CEL  
 33-MEP GSM258770 CEL  
 32-MEP GSM258770 CEL  
 31-HESC GSM258770 CEL  
 30-HESC GSM258770 CEL  
 29-Bone marrow GSM258628 CEL  
 28-Bone marrow GSM258627 CEL  
 27-paneth-cells-GE GSM116358 CEL  
 26-paneth-cells-GE GSM116357 CEL  
 25-paneth-cells GSM116350 CEL  
 24-paneth-cells GSM116359 CEL  
 23-paneth-cells GSM318589 CEL  
 22-paneth-cells GSM318590 CEL  
 21-paneth-cells GSM480375 cel  
 20-Colon-Crypt GSM480374 cel  
 19-Colon-Vill GSM480363 cel  
 18-Colon-Vill GSM480362 cel  
 17-Colon-IEC-Gf GSM349880 CEL  
 16-Colon-IEC-Gf GSM350375 CEL  
 15-Ileum-IEC-Gf GSM350376 CEL  
 14-Ileum-IEC GSM350371 CEL  
 13-Small-intestine-epithelium RMINEP002901 CEL  
 12-Small-intestine-epithelium RMINEP001001 CEL  
 11-FAE-RMPYEP001001 CEL  
 10-FAE-RMPYEP001001 CEL  
 09-Ileum-IEC GSM190797 CEL  
 08-Ileum-IEC GSM190796 CEL  
 07-Ileum-IEC GSM190795 CEL  
 06-CT-w-M-cells GSM190794 CEL  
 05-CT-y-M-cells GSM190793 CEL  
 04-PP-M-cells GSM190792 CEL  
 03-PP-M-cells GSM190791 CEL  
 02-PP-M-cells GSM190790 CEL  
 01-PP-M-cells GSM190789 CEL



Cluster0015\_Large intestine-related (171 nodes)

3,298.3  
3,134.7  
2,951.1  
2,777.5  
2,604  
2,430.4  
2,256.8  
2,083.2  
1,909.6  
1,738  
1,562.4  
1,388.8  
1,215.2  
1,041.6  
868  
694.4  
520.8  
347.2  
173.6  
0

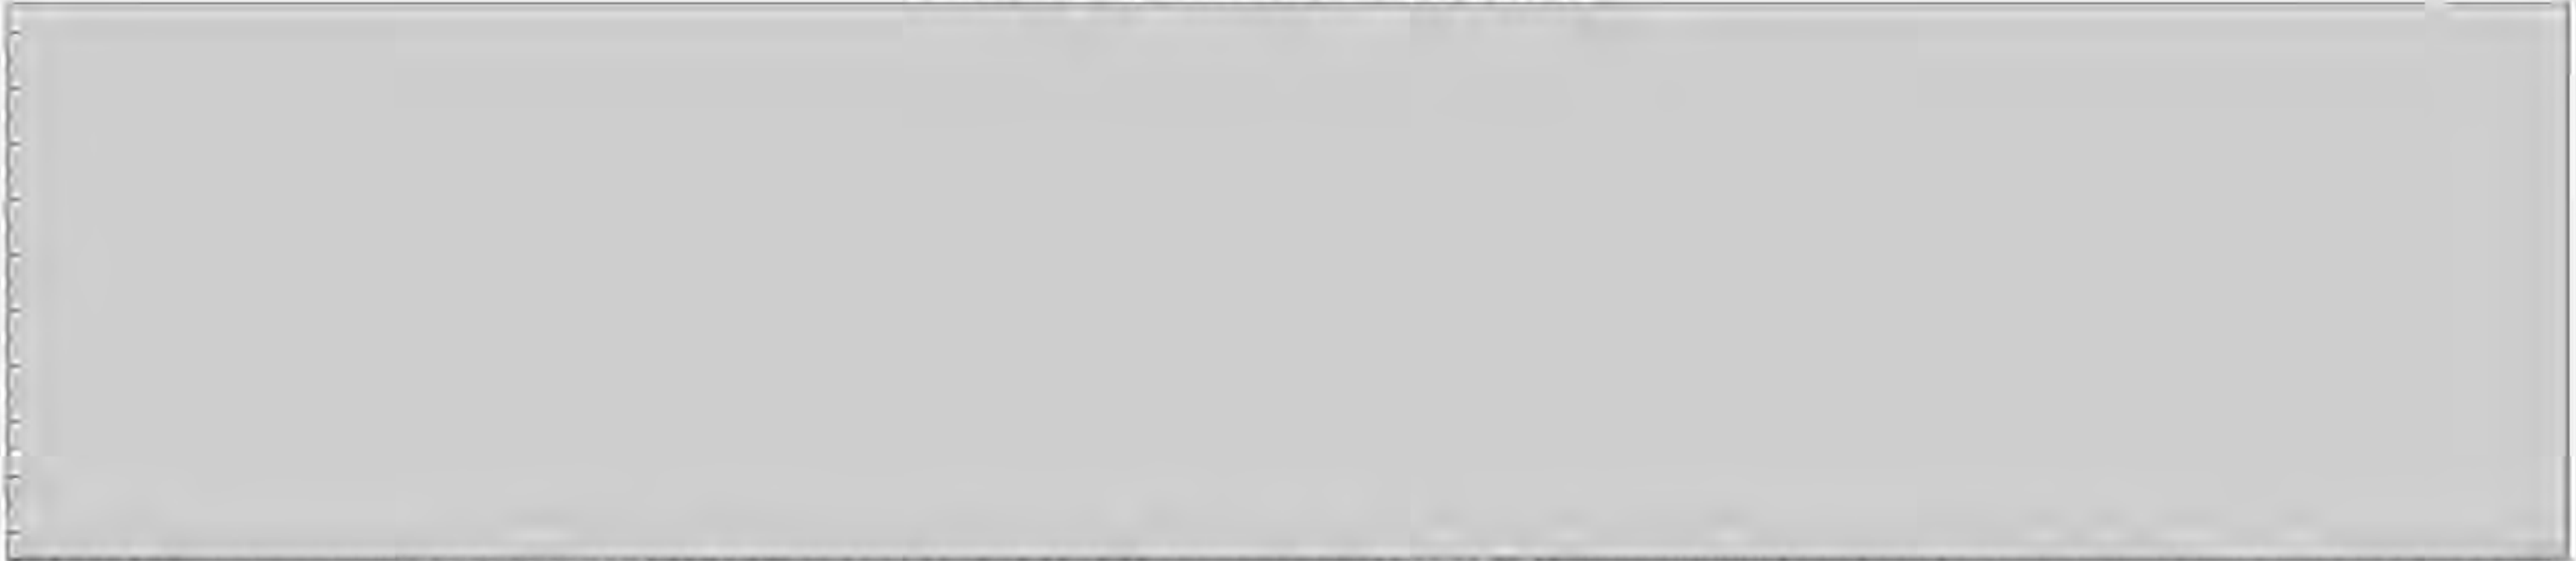

|                               |              |     |
|-------------------------------|--------------|-----|
| 01-PP-M-cells                 | GSM190789    | CEL |
| 02-PP-M-cells                 | GSM190790    | CEL |
| 03-PP-M-cells                 | GSM190791    | CEL |
| 04-CT-Y-M-cells               | GSM190792    | CEL |
| 05-CT-Y-M-cells               | GSM190793    | CEL |
| 06-CT-W-M-cells               | GSM190794    | CEL |
| 07-Ileum-IEC                  | GSM190795    | CEL |
| 08-Ileum-IEC                  | GSM190796    | CEL |
| 09-Ileum-IEC                  | GSM190797    | CEL |
| 10-FAE-RMP                    | GSM190798    | CEL |
| 11-FAE-RMP                    | GSM190799    | CEL |
| 12-Small-intestine-epithelium | RMINEP001001 | CEL |
| 13-Small-intestine-epithelium | RMINEP002001 | CEL |
| 14-Ileum-IEC                  | GSM350371    | CEL |
| 15-Ileum-IEC                  | GSM350375    | CEL |
| 16-Color-Vill                 | GSM480362    | cel |
| 18-Color-Vill                 | GSM480363    | cel |
| 19-Color-Vill                 | GSM480364    | cel |
| 20-Color-Crypt                | GSM480374    | cel |
| 21-Color-Crypt                | GSM480375    | cel |
| 22-Paneth-cells               | GSM318590    | CEL |
| 23-Paneth-cells               | GSM318589    | CEL |
| 24-Paneth-cells               | GSM116359    | CEL |
| 25-Paneth-cells               | GSM116350    | CEL |
| 26-Paneth-cells               | GSM116357    | CEL |
| 27-Paneth-cells               | GSM116358    | CEL |
| 28-Bone marrow                | GSM258627    | CEL |
| 29-Bone marrow                | GSM258628    | CEL |
| 30-NALT                       | GSM289411    | CEL |
| 31-NALT                       | GSM289410    | CEL |
| 32-NALT                       | GSM289409    | CEL |
| 33-NALT                       | GSM289408    | CEL |
| 34-Color-d9                   | GSM198810    | CEL |
| 35-Color-d9                   | GSM198810    | CEL |
| 36-Color-d4                   | GSM198810    | CEL |
| 37-Color-d4                   | GSM198810    | CEL |
| 38-Color-d4                   | GSM198810    | CEL |
| 39-Color-d4                   | GSM198810    | CEL |
| 40-Intestine-large            | GSM258675    | CEL |
| 41-Intestine-large            | GSM258677    | CEL |
| 42-Intestine-small            | GSM258678    | CEL |
| 43-Intestine-small            | GSM258679    | CEL |
| 44-Lymph-nodes                | GSM258680    | CEL |
| 45-Spleen                     | GSM258676    | CEL |
| 46-Spleen                     | GSM258677    | CEL |
| 47-Neuro2a                    | GSM258678    | CEL |
| 48-Neuro2a                    | GSM258679    | CEL |
| 49-Astrocytes                 | GSM241898    | CEL |
| 50-ming                       | GSM258672    | CEL |
| 51-ming                       | GSM258673    | CEL |
| 52-ming                       | GSM258674    | CEL |
| 53-MIMCD3                     | GSM258675    | CEL |
| 54-MIMCD3                     | GSM258676    | CEL |
| 55-MIMCD3                     | GSM258677    | CEL |
| 56-MIMCD3                     | GSM258678    | CEL |
| 57-MIMCD3                     | GSM258679    | CEL |
| 58-Bruc4                      | GSM258680    | CEL |
| 59-Bruc4                      | GSM258681    | CEL |
| 60-Bruc4                      | GSM258682    | CEL |
| 61-Bruc4                      | GSM258683    | CEL |
| 62-Bruc4                      | GSM258684    | CEL |
| 63-Bruc4                      | GSM258685    | CEL |
| 64-Bruc4                      | GSM258686    | CEL |
| 65-Bruc4                      | GSM258687    | CEL |
| 66-Bruc4                      | GSM258688    | CEL |
| 67-Bruc4                      | GSM258689    | CEL |
| 68-Bruc4                      | GSM258690    | CEL |
| 69-Bruc4                      | GSM258691    | CEL |
| 70-Bruc4                      | GSM258692    | CEL |
| 71-Bruc4                      | GSM258693    | CEL |
| 72-Bruc4                      | GSM258694    | CEL |
| 73-Bruc4                      | GSM258695    | CEL |
| 74-Bruc4                      | GSM258696    | CEL |
| 75-Bruc4                      | GSM258697    | CEL |
| 76-Bruc4                      | GSM258698    | CEL |
| 77-Bruc4                      | GSM258699    | CEL |
| 78-Bruc4                      | GSM258700    | CEL |
| 79-Bruc4                      | GSM258701    | CEL |
| 80-Bruc4                      | GSM258702    | CEL |
| 81-Bruc4                      | GSM258703    | CEL |
| 82-Bruc4                      | GSM258704    | CEL |
| 83-Bruc4                      | GSM258705    | CEL |
| 84-Bruc4                      | GSM258706    | CEL |
| 85-Bruc4                      | GSM258707    | CEL |
| 86-Bruc4                      | GSM258708    | CEL |
| 87-Bruc4                      | GSM258709    | CEL |
| 88-Bruc4                      | GSM258710    | CEL |
| 89-Bruc4                      | GSM258711    | CEL |
| 90-Bruc4                      | GSM258712    | CEL |
| 91-Bruc4                      | GSM258713    | CEL |
| 92-Bruc4                      | GSM258714    | CEL |
| 93-Bruc4                      | GSM258715    | CEL |
| 94-Bruc4                      | GSM258716    | CEL |
| 95-Bruc4                      | GSM258717    | CEL |
| 96-Bruc4                      | GSM258718    | CEL |
| 97-Bruc4                      | GSM258719    | CEL |
| 98-Bruc4                      | GSM258720    | CEL |
| 99-Bruc4                      | GSM258721    | CEL |
| 100-Bruc4                     | GSM258722    | CEL |
| 101-Bruc4                     | GSM258723    | CEL |
| 102-Bruc4                     | GSM258724    | CEL |
| 103-Bruc4                     | GSM258725    | CEL |
| 104-Bruc4                     | GSM258726    | CEL |
| 105-Bruc4                     | GSM258727    | CEL |
| 106-Bruc4                     | GSM258728    | CEL |
| 107-Bruc4                     | GSM258729    | CEL |
| 108-Bruc4                     | GSM258730    | CEL |
| 109-Bruc4                     | GSM258731    | CEL |
| 110-Bruc4                     | GSM258732    | CEL |
| 111-Bruc4                     | GSM258733    | CEL |
| 112-Bruc4                     | GSM258734    | CEL |
| 113-Bruc4                     | GSM258735    | CEL |
| 114-Bruc4                     | GSM258736    | CEL |
| 115-Bruc4                     | GSM258737    | CEL |
| 116-Bruc4                     | GSM258738    | CEL |
| 117-Bruc4                     | GSM258739    | CEL |
| 118-Bruc4                     | GSM258740    | CEL |
| 119-Bruc4                     | GSM258741    | CEL |
| 120-Bruc4                     | GSM258742    | CEL |
| 121-Bruc4                     | GSM258743    | CEL |
| 122-Bruc4                     | GSM258744    | CEL |
| 123-Bruc4                     | GSM258745    | CEL |
| 124-Bruc4                     | GSM258746    | CEL |
| 125-Bruc4                     | GSM258747    | CEL |
| 126-Bruc4                     | GSM258748    | CEL |
| 127-Bruc4                     | GSM258749    | CEL |
| 128-Bruc4                     | GSM258750    | CEL |
| 129-Bruc4                     | GSM258751    | CEL |
| 130-Bruc4                     | GSM258752    | CEL |
| 131-Bruc4                     | GSM258753    | CEL |
| 132-Bruc4                     | GSM258754    | CEL |
| 133-Bruc4                     | GSM258755    | CEL |
| 134-Bruc4                     | GSM258756    | CEL |
| 135-Bruc4                     | GSM258757    | CEL |
| 136-Bruc4                     | GSM258758    | CEL |
| 137-Bruc4                     | GSM258759    | CEL |
| 138-Bruc4                     | GSM258760    | CEL |
| 139-Bruc4                     | GSM258761    | CEL |
| 140-Bruc4                     | GSM258762    | CEL |
| 141-Bruc4                     | GSM258763    | CEL |
| 142-Bruc4                     | GSM258764    | CEL |
| 143-Bruc4                     | GSM258765    | CEL |
| 144-Bruc4                     | GSM258766    | CEL |
| 145-Bruc4                     | GSM258767    | CEL |
| 146-Bruc4                     | GSM258768    | CEL |
| 147-Bruc4                     | GSM258769    | CEL |
| 148-Bruc4                     | GSM258770    | CEL |
| 149-Bruc4                     | GSM258771    | CEL |
| 150-Bruc4                     | GSM258772    | CEL |
| 151-Bruc4                     | GSM258773    | CEL |
| 152-Bruc4                     | GSM258774    | CEL |
| 153-Bruc4                     | GSM258775    | CEL |
| 154-Bruc4                     | GSM258776    | CEL |
| 155-Bruc4                     | GSM258777    | CEL |
| 156-Bruc4                     | GSM258778    | CEL |
| 157-Bruc4                     | GSM258779    | CEL |
| 158-Bruc4                     | GSM258780    | CEL |
| 159-Bruc4                     | GSM258781    | CEL |
| 160-Bruc4                     | GSM258782    | CEL |
| 161-Bruc4                     | GSM258783    | CEL |
| 162-Bruc4                     | GSM258784    | CEL |
| 163-Bruc4                     | GSM258785    | CEL |
| 164-Bruc4                     | GSM258786    | CEL |
| 165-Bruc4                     | GSM258787    | CEL |
| 166-Bruc4                     | GSM258788    | CEL |
| 167-Bruc4                     | GSM258789    | CEL |
| 168-Bruc4                     | GSM258790    | CEL |
| 169-Bruc4                     | GSM258791    | CEL |
| 170-Bruc4                     | GSM258792    | CEL |
| 171-Bruc4                     | GSM258793    | CEL |



Cluster0016\_House keeping-Ribosomal (170 nodes)

12,441.1  
11,786.3  
11,131.5  
10,476.7  
9,821.9  
9,167.1  
8,512.3  
7,857.5  
7,202.7  
6,547.9  
5,893.2  
5,238.4  
4,583.6  
3,928.8  
3,274  
2,619.2  
1,964.4  
1,309.6  
654.8  
0

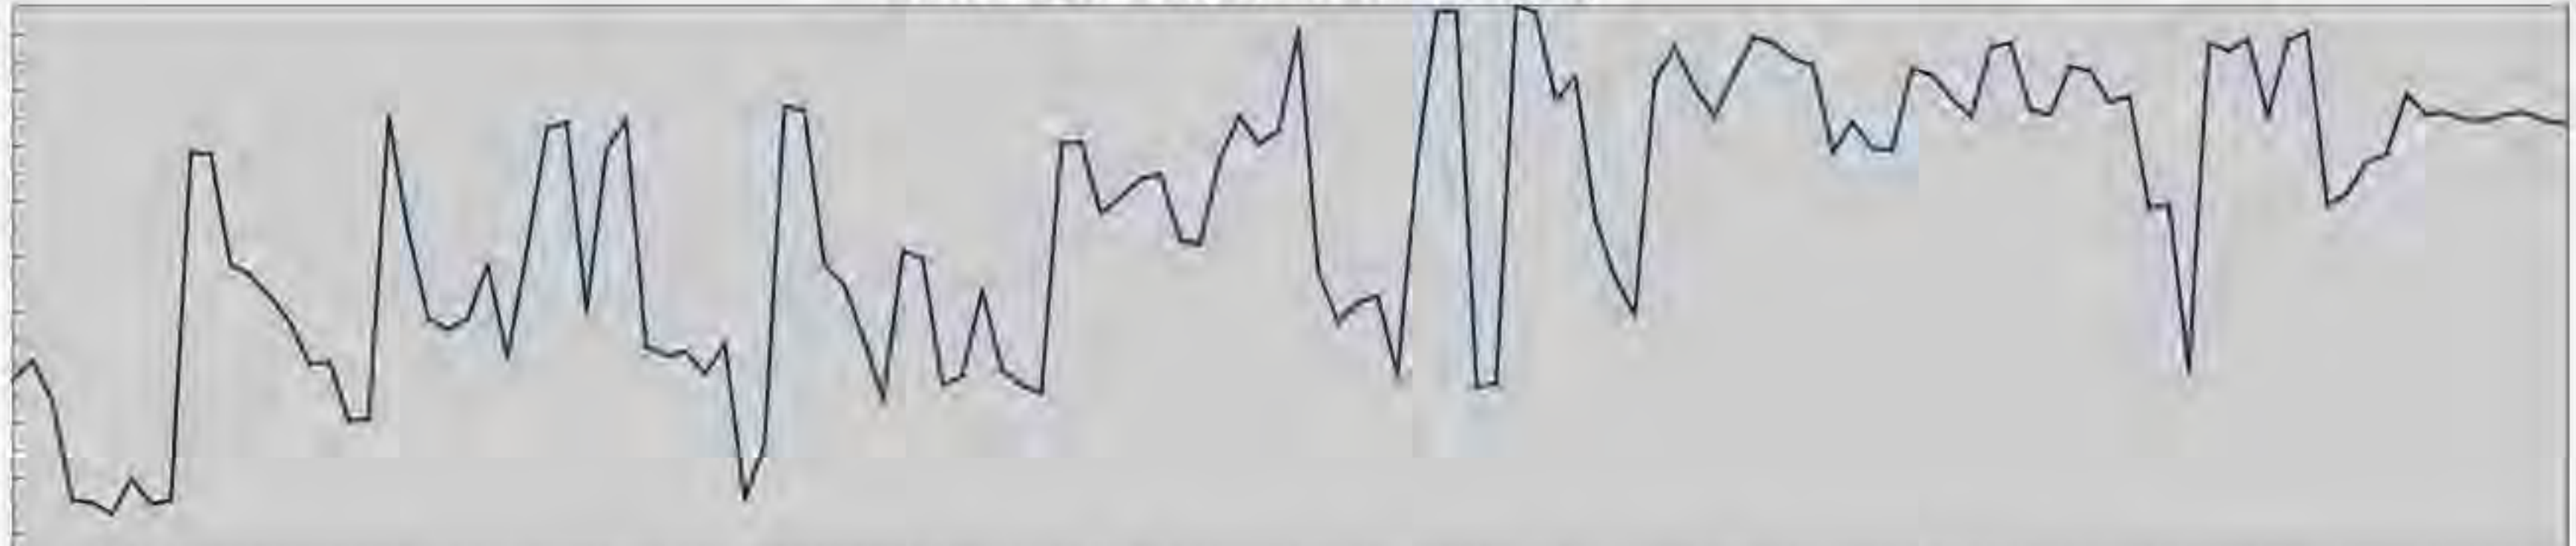

130-NALT GSM289411.CEL  
129-NALT GSM289410.CEL  
128-NALT GSM289409.CEL  
127-NALT GSM289408.CEL  
126-Colon-d9 GSM1988105.CEL  
125-Colon-d9 GSM1988104.CEL  
124-Colon-d9 GSM1988103.CEL  
123-Colon-d4 GSM1988102.CEL  
122-Colon-d4 GSM1988101.CEL  
121-Intestine-large GSM258676.CEL  
120-Intestine-large GSM258675.CEL  
119-Intestine-small GSM258678.CEL  
118-Intestine-small GSM258692.CEL  
117-Lymph-nodes GSM258691.CEL  
116-Lymph-nodes GSM258768.CEL  
115-Spleen GSM258767.CEL  
114-Spleen GSM258766.CEL  
113-Neuro2a GSM258728.CEL  
112-Neuro2a GSM258727.CEL  
111-Astrocytes GSM241898.CEL  
110-mim6 GSM258726.CEL  
109-mim6 GSM258725.CEL  
108-MIMCD3 GSM258724.CEL  
107-MIMCD3 GSM258723.CEL  
106-Bruce4 GSM258656.CEL  
105-Bruce4 GSM258655.CEL  
104-C2C12 GSM258690.CEL  
103-C2C12 GSM258689.CEL  
102-NH3T3 GSM258739.CEL  
101-NH3T3 GSM258738.CEL  
99-3T3-L1 GSM258610.CEL  
98-10T12 GSM258609.CEL  
97-10T12 GSM258631.CEL  
96-Osteoblast-d21 GSM258740.CEL  
95-Osteoblast-d21 GSM258739.CEL  
94-Osteoblast-d14 GSM258738.CEL  
93-Osteoblast-d14 GSM258737.CEL  
92-Osteoblast-d5 GSM258742.CEL  
91-Osteoblast-d5 GSM258741.CEL  
90-Chondrocytes GSM266741.CEL  
89-Chondrocytes GSM266740.CEL  
88-Nat Helper cell GSM465594.CEL  
87-Nat Helper cell GSM465593.CEL  
86-LT cell GSM465596.CEL  
85-MS-1 GSM234692.CEL  
84-Lymph-endc-cells GSM143704.CEL  
83-PP-FDC GSM481977.CEL  
82-PP-FDC GSM481976.CEL  
81-PP-FDC GSM481976.CEL  
80-FLY RMLNDC003001.CEL  
79-FLY RMLNDC003001.CEL  
78-Follicular-Bcells GSM258664.CEL  
77-Follicular-Bcells GSM258663.CEL  
76-MZ-Bcell GSM258622.CEL  
75-MZ-Bcell GSM258621.CEL  
74-BAF3 GSM258620.CEL  
73-BAF3 GSM258619.CEL  
72-Tregs GSM258778.CEL  
71-Tregs GSM258777.CEL  
70-T-cells-CD8+ GSM258776.CEL  
69-T-cells-CD8+ GSM258775.CEL  
68-T-cells-CD4+ GSM258774.CEL  
67-T-cells-CD4+ GSM258773.CEL  
66-Thymocyte-DN GSM465595.CEL  
65-Osteoclasts GSM258744.CEL  
64-Osteoclasts GSM258743.CEL  
63-Microglia GSM258721.CEL  
62-Microglia GSM258721.CEL  
61-PM-M-LPS-7h GSM258706.CEL  
60-PM-M-LPS-7h GSM258705.CEL  
59-PM-M-LPS-7d GSM258702.CEL  
58-PM-M-LPS-6h GSM258701.CEL  
57-BMM-LPS-6h GSM258699.CEL  
56-BMM-LPS-6h GSM258699.CEL  
55-BMM-LPS-6h GSM258699.CEL  
54-BMM-LPS-6h GSM258699.CEL  
53-Plasmacytoid-DC GSM258650.CEL  
52-Plasmacytoid-DC GSM258649.CEL  
51-CD8a-DC GSM258648.CEL  
50-CD8a-DC GSM258647.CEL  
49-CD8a+DC GSM258646.CEL  
48-CD8a+DC GSM258645.CEL  
47-NK-cells GSM258732.CEL  
46-NK-cells GSM258731.CEL  
45-Mast-cells-IgE+Ad GSM258718.CEL  
44-Mast-cells-IgE+Ad GSM258717.CEL  
43-Mast-cells-IgE GSM258714.CEL  
42-Mast-cells-IgE GSM258713.CEL  
41-Mast-cells GSM258712.CEL  
40-Granulocytes GSM258668.CEL  
39-Granulocytes GSM258667.CEL  
38-GMP GSM258666.CEL  
37-GMP GSM258665.CEL  
36-GMP GSM258664.CEL  
35-GMP GSM258642.CEL  
34-MEP GSM258720.CEL  
33-MEP GSM258719.CEL  
32-MEP GSM258719.CEL  
31-HSC GSM258770.CEL  
30-HSC GSM258769.CEL  
29-Bone marrow GSM258628.CEL  
28-Bone marrow GSM258627.CEL  
27-Paneth-cells-GF-1 GSM116357.CEL  
26-Paneth-cells-GF-1 GSM116357.CEL  
25-Paneth-cells GSM116350.CEL  
24-Paneth-cells GSM116350.CEL  
23-Paneth-cells GSM318589.CEL  
22-Paneth-cells GSM318589.CEL  
21-Colon-Crypt GSM480375.CEL  
20-Colon-Crypt GSM480374.CEL  
19-Colon-Vill GSM480363.CEL  
18-Colon-Vill GSM480362.CEL  
17-Color-IEC-GF GSM349880.CEL  
16-Color-IEC-GF GSM350375.CEL  
15-Ileum-IEC-GF GSM350375.CEL  
14-Ileum-IEC GSM350371.CEL  
13-Small-intestine-epithelium RMINEP002901.CEL  
12-Small-intestine-epithelium RMINEP001001.CEL  
11-FAE RMPYEP002001.CEL  
10-FAE RMPYEP001001.CEL  
09-Ileum-IEC GSM190797.CEL  
08-Ileum-IEC GSM190796.CEL  
07-Ileum-IEC GSM190795.CEL  
06-CT-v-M-cells GSM190794.CEL  
05-CT-v-M-cells GSM190793.CEL  
04-CT-v-M-cells GSM190792.CEL  
03-PP-M-cells GSM190791.CEL  
02-PP-M-cells GSM190790.CEL  
01-PP-M-cells GSM190789.CEL



Cluster0017\_Small and large intestine-related (157 nodes)

3,695.7  
3,501.2  
3,306.6  
3,112.1  
2,917.6  
2,723.1  
2,528.6  
2,334.1  
2,139.6  
1,945.1  
1,750.6  
1,556.1  
1,361.6  
1,167.1  
872.5  
778  
583.5  
389  
194.5  
0

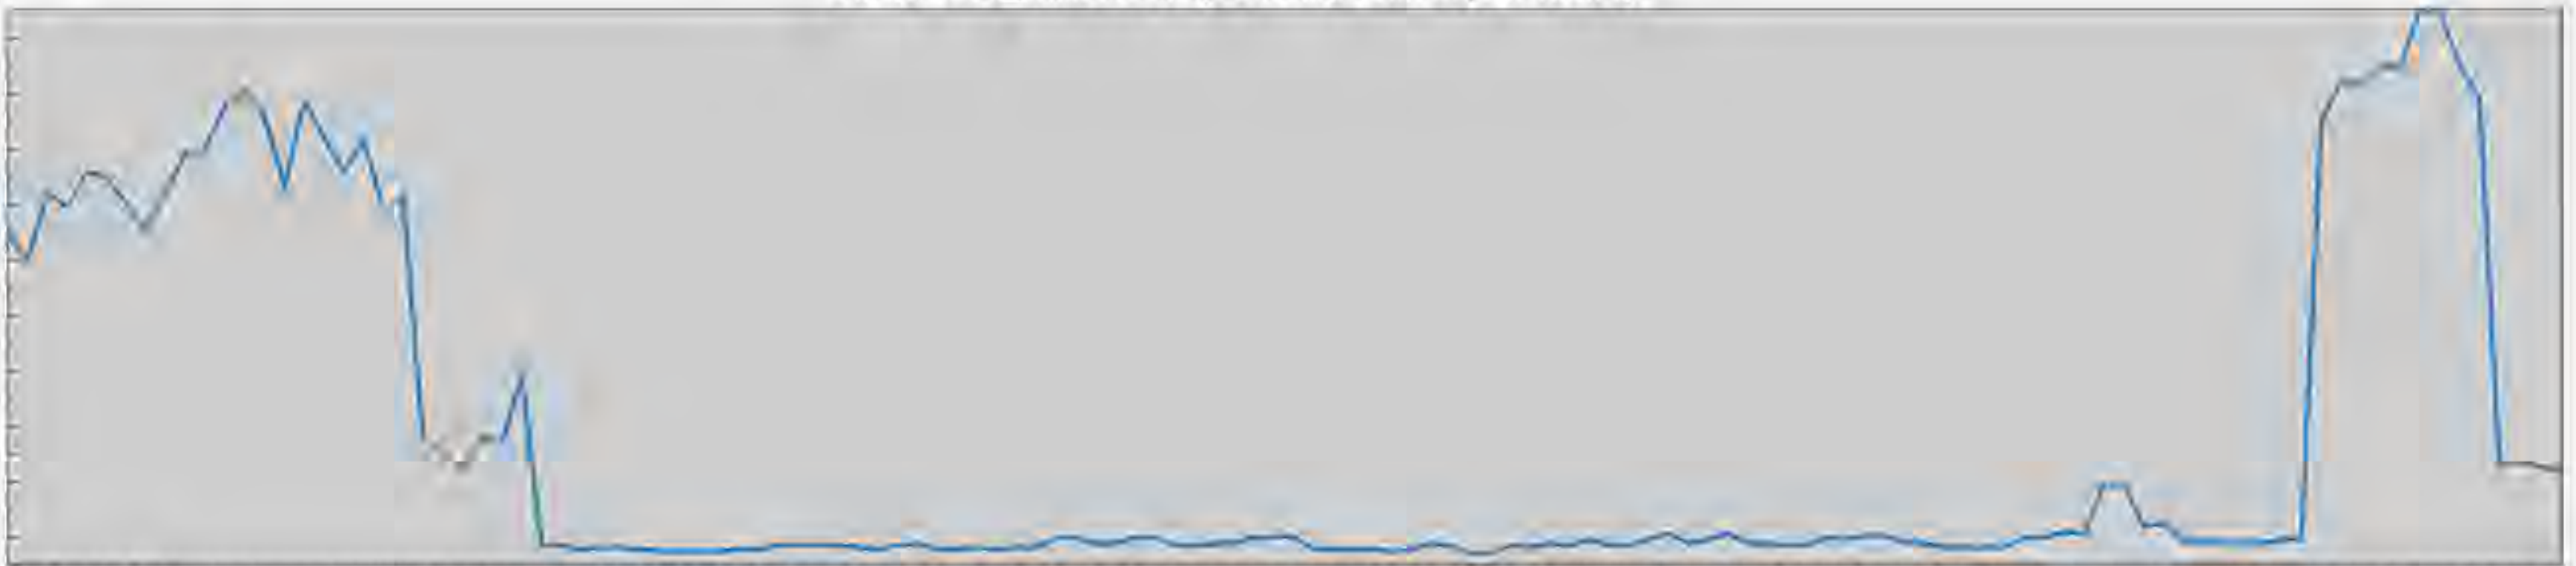

130-NALT GSM289411.CEL  
129-NALT GSM289410.CEL  
128-NALT GSM289409.CEL  
127-NALT GSM289408.CEL  
126-Colon-d9 GSM1988105.CEL  
125-Colon-d9 GSM1988104.CEL  
124-Colon-d9 GSM1988103.CEL  
123-Colon-d4 GSM1988102.CEL  
122-Colon-d4 GSM1988101.CEL  
121-Intestine-large GSM258676.CEL  
120-Intestine-large GSM258675.CEL  
119-Intestine-small GSM258677.CEL  
118-Intestine-small GSM258692.CEL  
117-Lymph-nodes GSM258691.CEL  
116-Lymph-nodes GSM258726.CEL  
115-Spleen GSM258767.CEL  
114-Spleen GSM258767.CEL  
113-Neuro2a GSM258728.CEL  
112-Neuro2a GSM258727.CEL  
111-Astrocytes GSM241898.CEL  
110-mim6 GSM258726.CEL  
109-mim6 GSM258725.CEL  
108-MIMCD3 GSM258724.CEL  
107-MIMCD3 GSM258723.CEL  
106-Bruce4 GSM258665.CEL  
105-Bruce4 GSM258665.CEL  
104-C2C12 GSM258690.CEL  
103-C2C12 GSM258629.CEL  
102-NH3T3 GSM258739.CEL  
101-NH3T3 GSM258739.CEL  
100-3T3-L1 GSM258610.CEL  
99-3T3-L1 GSM258609.CEL  
98-10T12 GSM258632.CEL  
97-10T12 GSM258631.CEL  
96-Osteoblast-d21 GSM258740.CEL  
95-Osteoblast-d21 GSM258739.CEL  
94-Osteoblast-d14 GSM258738.CEL  
93-Osteoblast-d14 GSM258737.CEL  
92-Osteoblast-d5 GSM258742.CEL  
91-Osteoblast-d5 GSM258741.CEL  
90-Chondrocytes GSM266741.CEL  
89-Chondrocytes GSM266740.CEL  
88-Nat Helper cell GSM465594.CEL  
87-Nat Helper cell GSM465593.CEL  
86-TT cell GSM465596.CEL  
85-MS-1 GSM234692.CEL  
84-Lymph-endo-cells GSM143704.CEL  
83-PP-FDC GSM481977.CEL  
82-PP-FDC GSM481978.CEL  
81-PP-FDC GSM481976.CEL  
80-D-LY RMLNDCC003001.CEL  
79-E-LY RMLNDCC003001.CEL  
78-Follicular-Bcells GSM258664.CEL  
77-Follicular-Bcells GSM258663.CEL  
76-MZ-Bcell GSM258627.CEL  
75-MZ-Bcell GSM258627.CEL  
74-BAF3 GSM258620.CEL  
73-BAF3 GSM258619.CEL  
72-Tregs GSM258778.CEL  
71-Tregs GSM258777.CEL  
70-T-cells-CD8+ GSM258776.CEL  
69-T-cells-CD8+ GSM258774.CEL  
68-T-cells-CD4+ GSM258773.CEL  
67-T-cells-CD4+ GSM258743.CEL  
66-Thymocyte-DN GSM465595.CEL  
65-Osteoclasts GSM258743.CEL  
64-Osteoclasts GSM258743.CEL  
63-Microglia GSM258721.CEL  
62-Microglia GSM258721.CEL  
61-PM-M-PS-7h GSM268706.CEL  
60-PM-M-PS-7h GSM268706.CEL  
59-PM-M-PS-6h GSM258702.CEL  
58-PM-M-PS-6h GSM258702.CEL  
57-BMM-LPS-6h GSM268699.CEL  
56-BMM-LPS-6h GSM268699.CEL  
55-BMM-LPS-6h GSM268699.CEL  
54-BMM-LPS-6h GSM268699.CEL  
53-Iasmacryoid-DC GSM258650.CEL  
52-CD8a-DC GSM258649.CEL  
51-CD8a-DC GSM258647.CEL  
50-CD8a-DC GSM258647.CEL  
49-CD8a+DC GSM258646.CEL  
48-CD8a+DC GSM258646.CEL  
47-NK-cells GSM258732.CEL  
46-NK-cells GSM258732.CEL  
45-Mast-cells-IgE+Ad GSM258718.CEL  
44-Mast-cells-IgE+Ad GSM258717.CEL  
43-Mast-cells-IgE GSM258714.CEL  
42-Mast-cells-IgE GSM258713.CEL  
41-Mast-cells GSM258712.CEL  
40-Granulocytes GSM258668.CEL  
39-Granulocytes GSM258667.CEL  
38-GMP GSM258666.CEL  
37-GMP GSM258666.CEL  
36-GMP GSM258666.CEL  
35-CMP GSM258642.CEL  
34-CMP GSM258642.CEL  
33-MEP GSM258720.CEL  
32-MEP GSM258719.CEL  
31-HSC GSM258770.CEL  
30-HSC GSM258770.CEL  
29-Bone marrow GSM258628.CEL  
28-Bone marrow GSM258627.CEL  
27-paneth-cells-GE GSM116358.CEL  
26-paneth-cells-GE GSM116357.CEL  
25-paneth-cells GSM116350.CEL  
24-paneth-cells GSM116359.CEL  
23-paneth-cells GSM318589.CEL  
22-paneth-cells GSM318590.CEL  
21-paneth-cells GSM480375.CEL  
20-Colon-Crypt GSM480374.CEL  
19-Colon-Vill GSM480363.CEL  
18-Colon-Vill GSM480362.CEL  
17-Colon-IEC-GE GSM349880.CEL  
16-Colon-IEC-GE GSM350375.CEL  
15-Ileum-IEC-TGF GSM350376.CEL  
14-Ileum-IEC GSM350371.CEL  
13-Small-intestine-epithelium RMINEP002001.CEL  
12-Small-intestine-epithelium RMINEP001001.CEL  
11-FAE-RMPYEP001001.CEL  
10-FAE-RMPYEP001001.CEL  
09-Ileum-IEC GSM190797.CEL  
08-Ileum-IEC GSM190796.CEL  
07-Ileum-IEC GSM190795.CEL  
06-CT-v-M-cells GSM190794.CEL  
05-CT-v-M-cells GSM190793.CEL  
04-CT-v-M-cells GSM190792.CEL  
03-PP-M-cells GSM190791.CEL  
02-PP-M-cells GSM190790.CEL  
01-PP-M-cells GSM190789.CEL



Cluster0018\_Low in some Paneth cells (152 nodes)

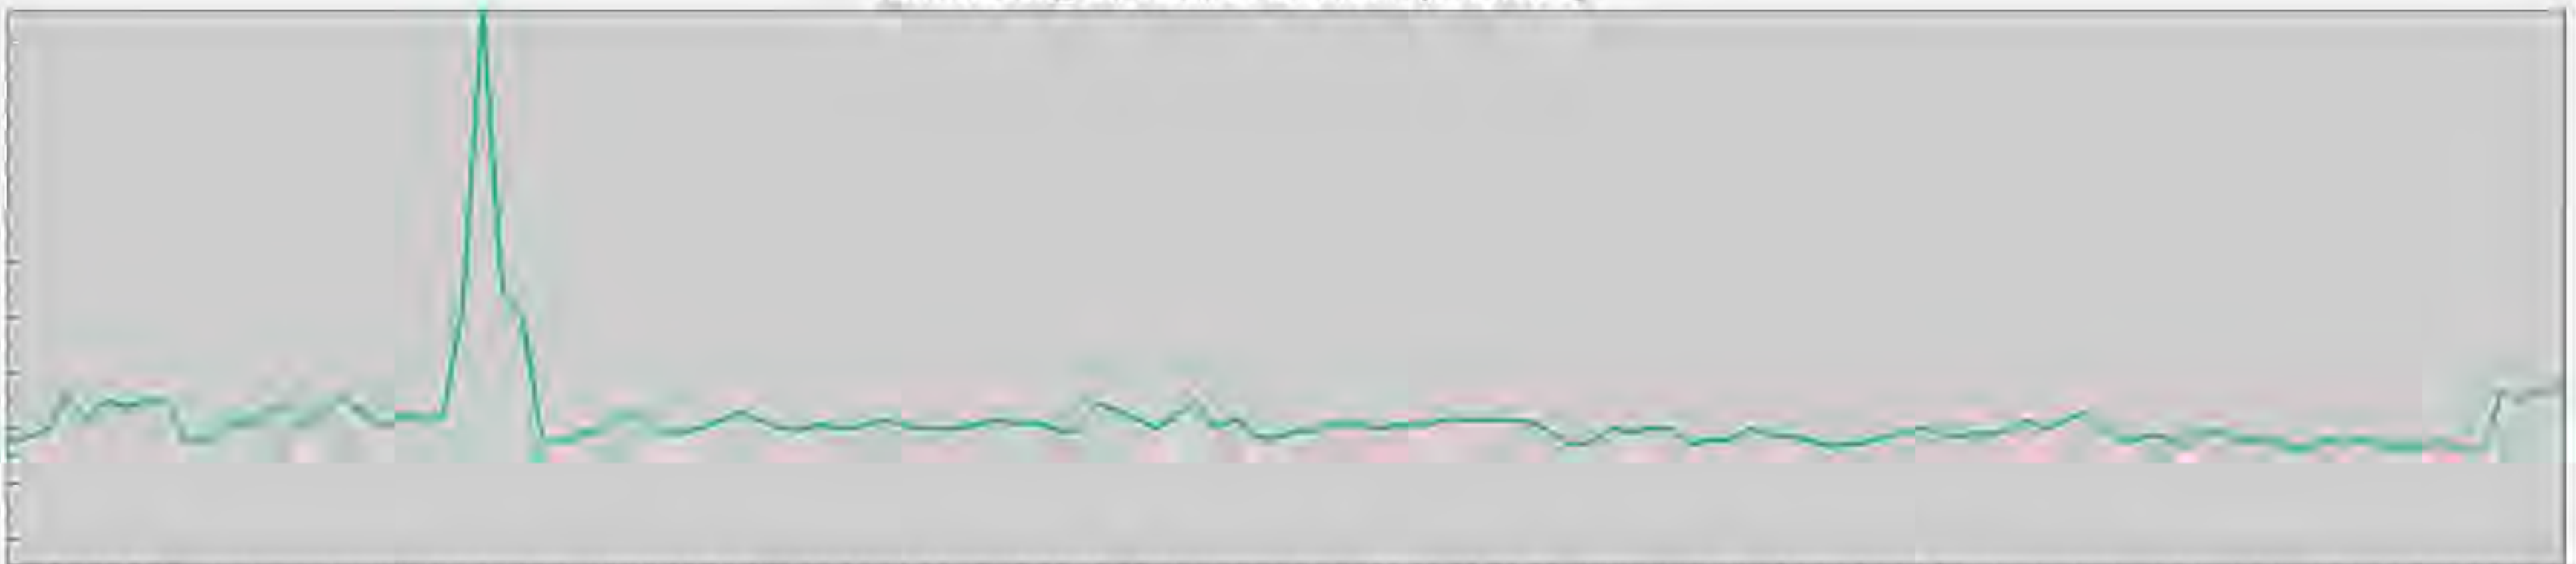

|     |                            |              |     |
|-----|----------------------------|--------------|-----|
| 01  | PP-M-cells                 | GSM190789    | CEL |
| 02  | PP-M-cells                 | GSM190790    | CEL |
| 03  | PP-M-cells                 | GSM190791    | CEL |
| 04  | CT-v-M-cells               | GSM190792    | CEL |
| 05  | CT-v-M-cells               | GSM190793    | CEL |
| 06  | CT-v-M-cells               | GSM190794    | CEL |
| 07  | Ileum-IEC                  | GSM190795    | CEL |
| 08  | Ileum-IEC                  | GSM190796    | CEL |
| 09  | Ileum-IEC                  | GSM190797    | CEL |
| 10  | FAE-RMP                    | GSM190798    | CEL |
| 11  | FAE-RMP                    | GSM190799    | CEL |
| 12  | Small-intestine-epithelium | RMINEP001001 | CEL |
| 13  | Small-intestine-epithelium | RMINEP002001 | CEL |
| 14  | Ileum-IEC                  | GSM350371    | CEL |
| 15  | Ileum-IEC                  | GSM350375    | CEL |
| 16  | Colon-VIII                 | GSM480362    | cel |
| 17  | Colon-VIII                 | GSM480363    | cel |
| 18  | Colon-VIII                 | GSM480364    | cel |
| 19  | Colon-Crypt                | GSM480374    | cel |
| 20  | Colon-Crypt                | GSM480375    | cel |
| 21  | Colon-Crypt                | GSM480376    | cel |
| 22  | Paneth-cells               | GSM318589    | CEL |
| 23  | Paneth-cells               | GSM318590    | CEL |
| 24  | Paneth-cells               | GSM116359    | CEL |
| 25  | Paneth-cells               | GSM116360    | CEL |
| 26  | Paneth-cells               | GSM116357    | CEL |
| 27  | Paneth-cells               | GSM116358    | CEL |
| 28  | Paneth-cells               | GSM116359    | CEL |
| 29  | Bone marrow                | GSM258627    | CEL |
| 30  | HSC                        | GSM258770    | CEL |
| 31  | HSC                        | GSM258771    | CEL |
| 32  | MEP                        | GSM258772    | CEL |
| 33  | MEP                        | GSM258773    | CEL |
| 34  | MEP                        | GSM258774    | CEL |
| 35  | GMP                        | GSM258642    | CEL |
| 36  | GMP                        | GSM258643    | CEL |
| 37  | GMP                        | GSM258644    | CEL |
| 38  | GMP                        | GSM258645    | CEL |
| 39  | Granulocytes               | GSM258667    | CEL |
| 40  | Mast-cells                 | GSM258712    | CEL |
| 41  | Mast-cells                 | GSM258713    | CEL |
| 42  | Mast-cells                 | GSM258714    | CEL |
| 43  | Mast-cells                 | GSM258715    | CEL |
| 44  | Mast-cells                 | GSM258716    | CEL |
| 45  | Mast-cells                 | GSM258717    | CEL |
| 46  | NK-cells                   | GSM258731    | CEL |
| 47  | NK-cells                   | GSM258732    | CEL |
| 48  | CD8a+DC                    | GSM258646    | CEL |
| 49  | CD8a+DC                    | GSM258647    | CEL |
| 50  | CD8a+DC                    | GSM258648    | CEL |
| 51  | CD8a+DC                    | GSM258649    | CEL |
| 52  | CD8a+DC                    | GSM258650    | CEL |
| 53  | CD8a+DC                    | GSM258651    | CEL |
| 54  | CD8a+DC                    | GSM258652    | CEL |
| 55  | CD8a+DC                    | GSM258653    | CEL |
| 56  | CD8a+DC                    | GSM258654    | CEL |
| 57  | CD8a+DC                    | GSM258655    | CEL |
| 58  | CD8a+DC                    | GSM258656    | CEL |
| 59  | CD8a+DC                    | GSM258657    | CEL |
| 60  | CD8a+DC                    | GSM258658    | CEL |
| 61  | CD8a+DC                    | GSM258659    | CEL |
| 62  | CD8a+DC                    | GSM258660    | CEL |
| 63  | Microglia                  | GSM258721    | CEL |
| 64  | Microglia                  | GSM258722    | CEL |
| 65  | Osteoclasts                | GSM258743    | CEL |
| 66  | Thymocyte-DN               | GSM465595    | CEL |
| 67  | T-cells-CD4+               | GSM258773    | CEL |
| 68  | T-cells-CD4+               | GSM258774    | CEL |
| 69  | T-cells-CD8+               | GSM258775    | CEL |
| 70  | T-cells-CD8+               | GSM258776    | CEL |
| 71  | Tregs                      | GSM258777    | CEL |
| 72  | Tregs                      | GSM258778    | CEL |
| 73  | BAF3                       | GSM258619    | CEL |
| 74  | BAF3                       | GSM258620    | CEL |
| 75  | MZ-Bcell                   | GSM258621    | CEL |
| 76  | MZ-Bcell                   | GSM258622    | CEL |
| 77  | Follicular-Bcells          | GSM258664    | CEL |
| 78  | Follicular-Bcells          | GSM258665    | CEL |
| 79  | F-LY                       | RMLNDC002001 | CEL |
| 80  | PP-FDC                     | GSM481976    | CEL |
| 81  | PP-FDC                     | GSM481977    | CEL |
| 82  | PP-FDC                     | GSM481978    | CEL |
| 83  | PP-FDC                     | GSM481979    | CEL |
| 84  | Lymph-endo-cells           | GSM143704    | CEL |
| 85  | MS-1                       | GSM234692    | CEL |
| 86  | Tt cell                    | GSM465596    | CEL |
| 87  | Nat Helper cell            | GSM465593    | CEL |
| 88  | Nat Helper cell            | GSM465594    | CEL |
| 89  | Chondrocytes               | GSM266741    | CEL |
| 90  | Chondrocytes               | GSM266742    | CEL |
| 91  | Osteoblast-d5              | GSM258741    | CEL |
| 92  | Osteoblast-d5              | GSM258742    | CEL |
| 93  | Osteoblast-d14             | GSM258737    | CEL |
| 94  | Osteoblast-d14             | GSM258738    | CEL |
| 95  | Osteoblast-d21             | GSM258739    | CEL |
| 96  | Osteoblast-d21             | GSM258740    | CEL |
| 97  | OT12                       | GSM258631    | CEL |
| 98  | OT12                       | GSM258632    | CEL |
| 99  | 3T3-L1                     | GSM258609    | CEL |
| 100 | 3T3-L1                     | GSM258610    | CEL |
| 101 | NH3T3                      | GSM258729    | CEL |
| 102 | NH3T3                      | GSM258730    | CEL |
| 103 | C2C12                      | GSM258629    | CEL |
| 104 | C2C12                      | GSM258630    | CEL |
| 105 | Bruce4                     | GSM258666    | CEL |
| 106 | Bruce4                     | GSM258667    | CEL |
| 107 | MIMCD3                     | GSM258723    | CEL |
| 108 | MIMCD3                     | GSM258724    | CEL |
| 109 | mim6                       | GSM258725    | CEL |
| 110 | mim6                       | GSM258726    | CEL |
| 111 | Astrocytes                 | GSM241898    | CEL |
| 112 | Neuro2a                    | GSM258727    | CEL |
| 113 | Spleen                     | GSM258767    | CEL |
| 114 | Spleen                     | GSM258768    | CEL |
| 115 | Lymph-nodes                | GSM258691    | CEL |
| 116 | Lymph-nodes                | GSM258692    | CEL |
| 117 | Lymph-nodes                | GSM258693    | CEL |
| 118 | Intestine-small            | GSM258677    | CEL |
| 119 | Intestine-small            | GSM258678    | CEL |
| 120 | Intestine-large            | GSM258675    | CEL |
| 121 | Intestine-large            | GSM258676    | CEL |
| 122 | Colon-d4                   | GSM198810    | CEL |
| 123 | Colon-d4                   | GSM198811    | CEL |
| 124 | Colon-d9                   | GSM198810    | CEL |
| 125 | Colon-d9                   | GSM198811    | CEL |
| 126 | Colon-d9                   | GSM198812    | CEL |
| 127 | NALT                       | GSM289408    | CEL |
| 128 | NALT                       | GSM289409    | CEL |
| 129 | NALT                       | GSM289410    | CEL |
| 130 | NALT                       | GSM289411    | CEL |







Cluster0020\_Natural helper cell-related (151 nodes)

1,928.4  
1,826.9  
1,725.4  
1,623.9  
1,522.4  
1,420.9  
1,319.4  
1,218  
1,116.5  
1,015  
913.5  
812  
710.5  
609  
507.5  
406  
304.5  
203  
101.5  
0

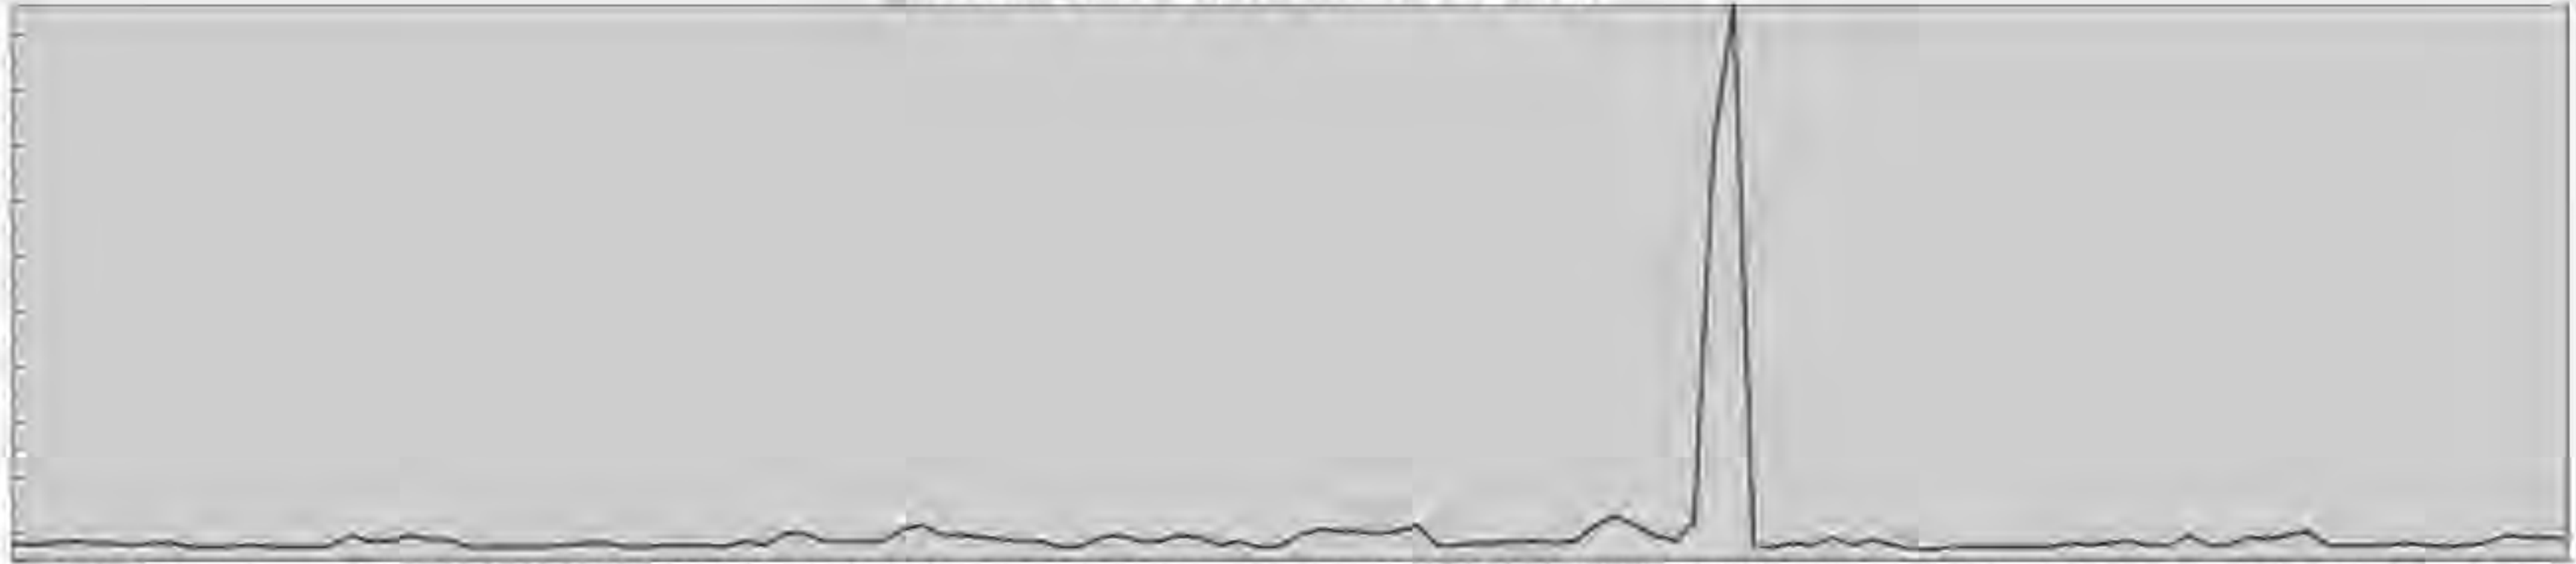

|                               |              |      |
|-------------------------------|--------------|------|
| 01-PP-M-cells                 | GSM190789    | CELL |
| 02-PP-M-cells                 | GSM190790    | CELL |
| 03-PP-M-cells                 | GSM190791    | CELL |
| 04-CT-Y-M-cells               | GSM190792    | CELL |
| 05-CT-Y-M-cells               | GSM190793    | CELL |
| 06-CT-W-M-cells               | GSM190794    | CELL |
| 07-Ileum-IEC                  | GSM190795    | CELL |
| 08-Ileum-IEC                  | GSM190796    | CELL |
| 09-Ileum-IEC                  | GSM190797    | CELL |
| 10-FAE-RMP                    | GSM190798    | CELL |
| 11-FAE-RMP                    | GSM190799    | CELL |
| 12-Small-intestine-epithelium | RMINEP001001 | CELL |
| 13-Small-intestine-epithelium | RMINEP002001 | CELL |
| 14-Ileum-IEC                  | GSM350371    | CELL |
| 15-Ileum-IEC                  | GSM350375    | CELL |
| 16-Colon-VIII                 | GSM480362    | cel  |
| 17-Colon-VIII                 | GSM480363    | cel  |
| 18-Colon-VIII                 | GSM480364    | cel  |
| 19-Colon-VIII                 | GSM480365    | cel  |
| 20-Colon-Crypt                | GSM480374    | cel  |
| 21-Colon-Crypt                | GSM480375    | cel  |
| 22-Paneth-cells               | GSM318590    | CELL |
| 23-Paneth-cells               | GSM318589    | CELL |
| 24-Paneth-cells               | GSM116359    | CELL |
| 25-Paneth-cells               | GSM116350    | CELL |
| 26-Paneth-cells               | GSM116357    | CELL |
| 27-Paneth-cells               | GSM116358    | CELL |
| 28-Bone marrow                | GSM258627    | CELL |
| 29-Bone marrow                | GSM258628    | CELL |
| 30-NALT                       | GSM289411    | CELL |
| 31-NALT                       | GSM289410    | CELL |
| 32-NALT                       | GSM289409    | CELL |
| 33-NALT                       | GSM289408    | CELL |
| 34-Color-d9                   | GSM198810    | CELL |
| 35-Color-d9                   | GSM198811    | CELL |
| 36-Color-d9                   | GSM198812    | CELL |
| 37-Color-d4                   | GSM198813    | CELL |
| 38-Color-d4                   | GSM198814    | CELL |
| 39-Color-d4                   | GSM198815    | CELL |
| 40-Color-d4                   | GSM198816    | CELL |
| 41-Intestine-large            | GSM258676    | CELL |
| 42-Intestine-large            | GSM258675    | CELL |
| 43-Intestine-small            | GSM258677    | CELL |
| 44-Intestine-small            | GSM258678    | CELL |
| 45-Lymph-nodes                | GSM258679    | CELL |
| 46-Spleen                     | GSM258680    | CELL |
| 47-Spleen                     | GSM258681    | CELL |
| 48-Neuro2a                    | GSM241898    | CELL |
| 49-Neuro2a                    | GSM241899    | CELL |
| 50-Astrocytes                 | GSM241900    | CELL |
| 51-mimb                       | GSM258726    | CELL |
| 52-mimb                       | GSM258727    | CELL |
| 53-MIMCD3                     | GSM258728    | CELL |
| 54-MIMCD3                     | GSM258729    | CELL |
| 55-MIMCD3                     | GSM258730    | CELL |
| 56-MIMCD3                     | GSM258731    | CELL |
| 57-Brice4                     | GSM258732    | CELL |
| 58-Brice4                     | GSM258733    | CELL |
| 59-Brice4                     | GSM258734    | CELL |
| 60-Brice4                     | GSM258735    | CELL |
| 61-NH3T3                      | GSM258736    | CELL |
| 62-NH3T3                      | GSM258737    | CELL |
| 63-NH3T3                      | GSM258738    | CELL |
| 64-NH3T3                      | GSM258739    | CELL |
| 65-3T3-L1                     | GSM258610    | CELL |
| 66-3T3-L1                     | GSM258609    | CELL |
| 67-10T12                      | GSM258632    | CELL |
| 68-10T12                      | GSM258631    | CELL |
| 69-Osteoblast-d21             | GSM258740    | CELL |
| 70-Osteoblast-d21             | GSM258739    | CELL |
| 71-Osteoblast-d14             | GSM258738    | CELL |
| 72-Osteoblast-d14             | GSM258737    | CELL |
| 73-Osteoblast-d5              | GSM258742    | CELL |
| 74-Osteoblast-d5              | GSM258741    | CELL |
| 75-Chondrocytes               | GSM266741    | CELL |
| 76-Chondrocytes               | GSM266740    | CELL |
| 77-Nat Helper cell            | GSM465594    | CELL |
| 78-Nat Helper cell            | GSM465593    | CELL |
| 79-LT cell                    | GSM465596    | CELL |
| 80-MS-1                       | GSM234692    | CELL |
| 81-Lymph-endo-cells           | GSM143704    | CELL |
| 82-Lymph-endo-cells           | GSM481977    | CELL |
| 83-Lymph-endo-cells           | GSM481978    | CELL |
| 84-Lymph-endo-cells           | GSM481979    | CELL |
| 85-Lymph-endo-cells           | GSM481976    | CELL |
| 86-Lymph-endo-cells           | GSM481977    | CELL |
| 87-Lymph-endo-cells           | GSM481978    | CELL |
| 88-Lymph-endo-cells           | GSM481979    | CELL |
| 89-Lymph-endo-cells           | GSM481976    | CELL |
| 90-Lymph-endo-cells           | GSM481977    | CELL |
| 91-Lymph-endo-cells           | GSM481978    | CELL |
| 92-Lymph-endo-cells           | GSM481979    | CELL |
| 93-Lymph-endo-cells           | GSM481976    | CELL |
| 94-Lymph-endo-cells           | GSM481977    | CELL |
| 95-Lymph-endo-cells           | GSM481978    | CELL |
| 96-Lymph-endo-cells           | GSM481979    | CELL |
| 97-Lymph-endo-cells           | GSM481976    | CELL |
| 98-Lymph-endo-cells           | GSM481977    | CELL |
| 99-Lymph-endo-cells           | GSM481978    | CELL |
| 100-Lymph-endo-cells          | GSM481979    | CELL |
| 101-Lymph-endo-cells          | GSM481976    | CELL |
| 102-Lymph-endo-cells          | GSM481977    | CELL |
| 103-Lymph-endo-cells          | GSM481978    | CELL |
| 104-Lymph-endo-cells          | GSM481979    | CELL |
| 105-Lymph-endo-cells          | GSM481976    | CELL |
| 106-Lymph-endo-cells          | GSM481977    | CELL |
| 107-Lymph-endo-cells          | GSM481978    | CELL |
| 108-Lymph-endo-cells          | GSM481979    | CELL |
| 109-Lymph-endo-cells          | GSM481976    | CELL |
| 110-Lymph-endo-cells          | GSM481977    | CELL |
| 111-Lymph-endo-cells          | GSM481978    | CELL |
| 112-Lymph-endo-cells          | GSM481979    | CELL |
| 113-Lymph-endo-cells          | GSM481976    | CELL |
| 114-Lymph-endo-cells          | GSM481977    | CELL |
| 115-Lymph-endo-cells          | GSM481978    | CELL |
| 116-Lymph-endo-cells          | GSM481979    | CELL |
| 117-Lymph-endo-cells          | GSM481976    | CELL |
| 118-Lymph-endo-cells          | GSM481977    | CELL |
| 119-Lymph-endo-cells          | GSM481978    | CELL |
| 120-Lymph-endo-cells          | GSM481979    | CELL |
| 121-Lymph-endo-cells          | GSM481976    | CELL |
| 122-Lymph-endo-cells          | GSM481977    | CELL |
| 123-Lymph-endo-cells          | GSM481978    | CELL |
| 124-Lymph-endo-cells          | GSM481979    | CELL |
| 125-Lymph-endo-cells          | GSM481976    | CELL |
| 126-Lymph-endo-cells          | GSM481977    | CELL |
| 127-Lymph-endo-cells          | GSM481978    | CELL |
| 128-Lymph-endo-cells          | GSM481979    | CELL |
| 129-Lymph-endo-cells          | GSM481976    | CELL |
| 130-Lymph-endo-cells          | GSM481977    | CELL |
| 131-Lymph-endo-cells          | GSM481978    | CELL |
| 132-Lymph-endo-cells          | GSM481979    | CELL |
| 133-Lymph-endo-cells          | GSM481976    | CELL |
| 134-Lymph-endo-cells          | GSM481977    | CELL |
| 135-Lymph-endo-cells          | GSM481978    | CELL |
| 136-Lymph-endo-cells          | GSM481979    | CELL |
| 137-Lymph-endo-cells          | GSM481976    | CELL |
| 138-Lymph-endo-cells          | GSM481977    | CELL |
| 139-Lymph-endo-cells          | GSM481978    | CELL |
| 140-Lymph-endo-cells          | GSM481979    | CELL |
| 141-Lymph-endo-cells          | GSM481976    | CELL |
| 142-Lymph-endo-cells          | GSM481977    | CELL |
| 143-Lymph-endo-cells          | GSM481978    | CELL |
| 144-Lymph-endo-cells          | GSM481979    | CELL |
| 145-Lymph-endo-cells          | GSM481976    | CELL |
| 146-Lymph-endo-cells          | GSM481977    | CELL |
| 147-Lymph-endo-cells          | GSM481978    | CELL |
| 148-Lymph-endo-cells          | GSM481979    | CELL |
| 149-Lymph-endo-cells          | GSM481976    | CELL |
| 150-Lymph-endo-cells          | GSM481977    | CELL |
| 151-Lymph-endo-cells          | GSM481978    | CELL |



Cluster0021\_House keeping-cell cycle (146 nodes)

1,173.5  
1,111.8  
1,050  
988.2  
926.5  
864.7  
802.9  
741.2  
679.4  
617.6  
555.9  
494.1  
432.4  
370.6  
308.8  
247.1  
185.3  
123.5  
61.8  
0

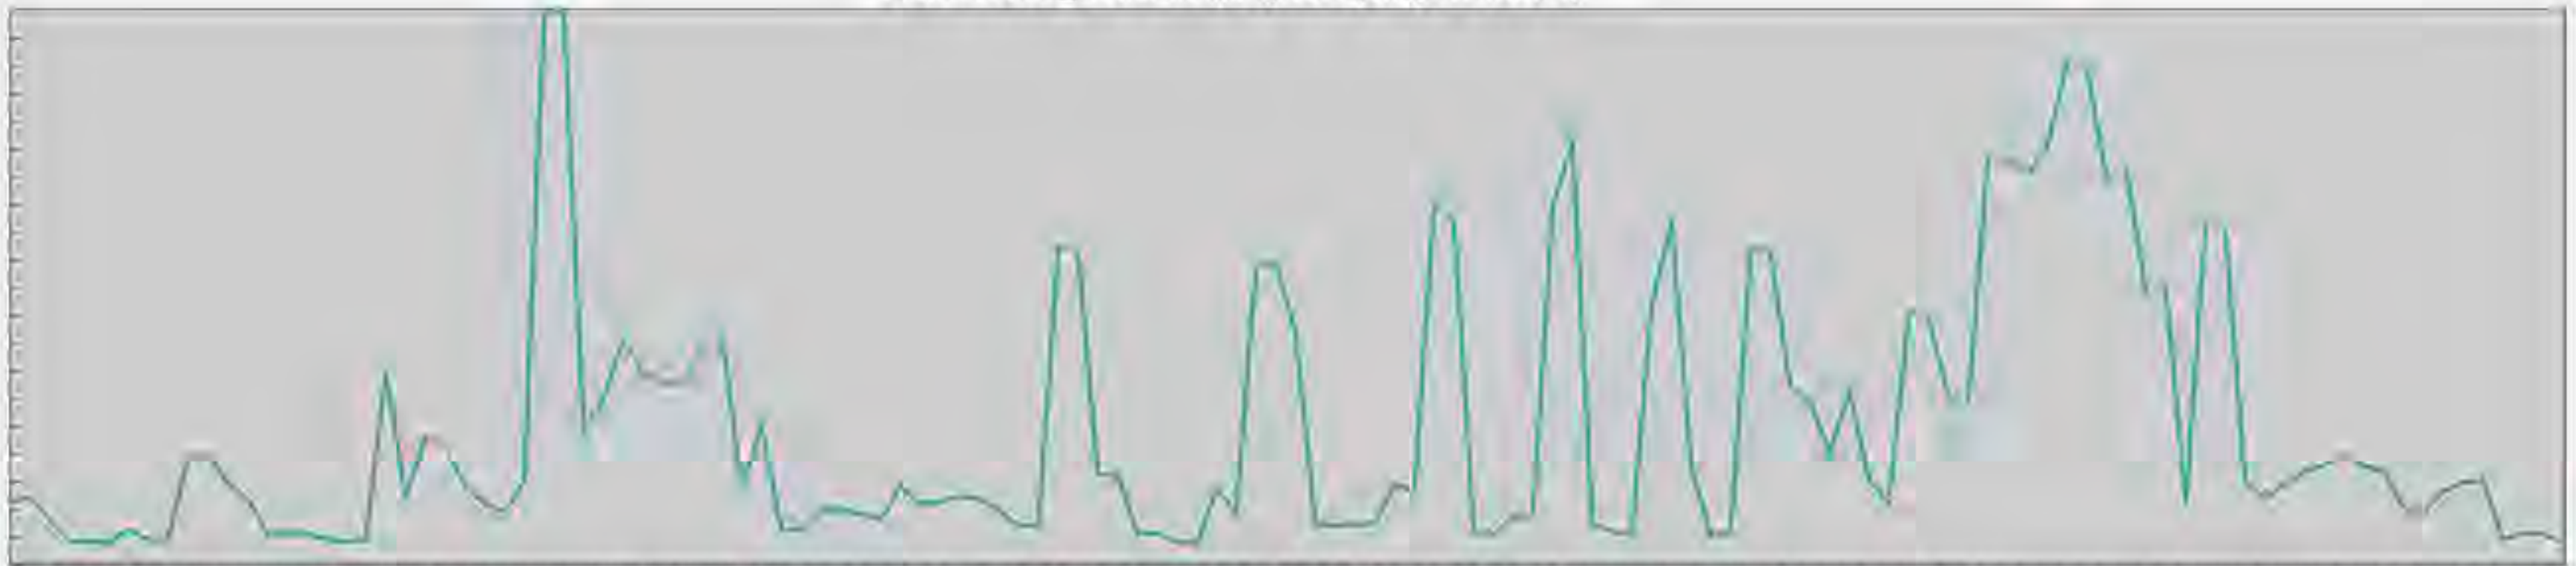

01-PP-M-cells\_GSM190789.CEL  
02-PP-M-cells\_GSM190790.CEL  
03-PP-M-cells\_GSM190791.CEL  
04-CT-v-M-cells\_GSM190792.CEL  
05-CT-v-M-cells\_GSM190793.CEL  
06-CT-v-M-cells\_GSM190794.CEL  
07-Ileum-IEC\_GSM190795.CEL  
08-Ileum-IEC\_GSM190796.CEL  
09-Ileum-IEC\_GSM190797.CEL  
10-FAE-RMPYE\_P001001.CEL  
11-FAE-RMPYE\_P002001.CEL  
12-Small-intestine-epithelium\_RMINEP001001.CEL  
13-Small-intestine-epithelium\_RMINEP002001.CEL  
14-Ileum-IEC\_GSM350371.CEL  
15-Colon-IEC-Gf\_GSM350375.CEL  
16-Colon-Vill-GSM480362.CEL  
17-Colon-Vill-GSM480363.CEL  
18-Colon-Vill-GSM480364.CEL  
19-Colon-Crypt\_GSM480374.CEL  
20-Colon-Crypt\_GSM480375.CEL  
21-Paneth-cells\_GSM480375.CEL  
22-Paneth-cells\_GSM318589.CEL  
23-Paneth-cells\_GSM318590.CEL  
24-Paneth-cells\_GSM116359.CEL  
25-Paneth-cells\_GSM116359.CEL  
26-Paneth-cells-Gf-1-GSM116357.CEL  
27-Paneth-cells-Gf-1-GSM116357.CEL  
28-Bone marrow\_GSM258627.CEL  
29-Bone marrow\_GSM258627.CEL  
30-HSC\_GSM258770.CEL  
31-HSC\_GSM258770.CEL  
32-MEP-GSM258770.CEL  
33-MEP-GSM258770.CEL  
34-MEP-GSM258770.CEL  
35-MEP-GSM258770.CEL  
36-MEP-GSM258770.CEL  
37-MEP-GSM258770.CEL  
38-Granulocytes\_GSM258667.CEL  
39-Granulocytes\_GSM258667.CEL  
40-Mast-cells\_GSM258711.CEL  
41-Mast-cells\_GSM258711.CEL  
42-Mast-cells-Gf-GSM258713.CEL  
43-Mast-cells-Gf-GSM258713.CEL  
44-Mast-cells-Gf+Ad-GSM258718.CEL  
45-Mast-cells-Gf+Ad-GSM258718.CEL  
46-NK-cells\_GSM258731.CEL  
47-NK-cells\_GSM258731.CEL  
48-CD8a+DC\_GSM258645.CEL  
49-CD8a+DC\_GSM258645.CEL  
50-CD8a-DC\_GSM258647.CEL  
51-CD8a-DC\_GSM258647.CEL  
52-Plasmacytoid-DC\_GSM258649.CEL  
53-Plasmacytoid-DC\_GSM258649.CEL  
54-BMM-GSM258694.CEL  
55-BMM-GSM258694.CEL  
56-BMM-LPS-Gf-GSM258699.CEL  
57-BMM-LPS-Gf-GSM258699.CEL  
58-PMM-LPS-Gf-GSM258702.CEL  
59-PMM-LPS-Gf-GSM258702.CEL  
60-PMM-LPS-Gf-GSM258705.CEL  
61-PMM-LPS-Gf-GSM258705.CEL  
62-Microglia\_GSM258721.CEL  
63-Microglia\_GSM258721.CEL  
64-Osteoclasts\_GSM258743.CEL  
65-Osteoclasts\_GSM258743.CEL  
66-Thymocyte-DN\_GSM465595.CEL  
67-T-cells-CD4+GSM258773.CEL  
68-T-cells-CD4+GSM258773.CEL  
69-T-cells-CD8+GSM258776.CEL  
70-T-cells-CD8+GSM258776.CEL  
71-Tregs\_GSM258778.CEL  
72-Tregs\_GSM258778.CEL  
73-BAF3\_GSM258619.CEL  
74-BAF3\_GSM258620.CEL  
75-MZ-Bcell\_GSM258622.CEL  
76-MZ-Bcell\_GSM258622.CEL  
77-Follicular-Bcells\_GSM258664.CEL  
78-Follicular-Bcells\_GSM258664.CEL  
79-FLY-RMLNDC002001.CEL  
80-FLY-RMLNDC003001.CEL  
81-PP-FDC\_GSM481976.CEL  
82-PP-FDC\_GSM481976.CEL  
83-PP-FDC\_GSM481977.CEL  
84-Lymph-endo-cells\_GSM143704.CEL  
85-MS-1\_GSM234692.CEL  
86-LTcell\_GSM465596.CEL  
87-Nat Helper cell\_GSM465593.CEL  
88-Nat Helper cell\_GSM465594.CEL  
89-Chondrocytes\_GSM266741.CEL  
90-Chondrocytes\_GSM266741.CEL  
91-Osteoblast-d5\_GSM258741.CEL  
92-Osteoblast-d5\_GSM258742.CEL  
93-Osteoblast-d14\_GSM258737.CEL  
94-Osteoblast-d14\_GSM258738.CEL  
95-Osteoblast-d21\_GSM258739.CEL  
96-Osteoblast-d21\_GSM258739.CEL  
97-10T12\_GSM258631.CEL  
98-10T12\_GSM258631.CEL  
99-3T3-L1\_GSM258609.CEL  
100-3T3-L1\_GSM258610.CEL  
101-NH3T3\_GSM258729.CEL  
102-NH3T3\_GSM258730.CEL  
103-C2C12\_GSM258629.CEL  
104-C2C12\_GSM258630.CEL  
105-Bruce4\_GSM258656.CEL  
106-Bruce4\_GSM258656.CEL  
107-MIMCD3\_GSM258723.CEL  
108-MIMCD3\_GSM258723.CEL  
109-mim6\_GSM258725.CEL  
110-mim6\_GSM258725.CEL  
111-Astrocytes\_GSM241898.CEL  
112-Astrocytes\_GSM241898.CEL  
113-Spleen\_GSM258767.CEL  
114-Spleen\_GSM258767.CEL  
115-Spleen\_GSM258768.CEL  
116-Lymph-nodes\_GSM258691.CEL  
117-Lymph-nodes\_GSM258691.CEL  
118-Intestine-small\_GSM258692.CEL  
119-Intestine-small\_GSM258692.CEL  
120-Intestine-large\_GSM258675.CEL  
121-Intestine-large\_GSM258676.CEL  
122-Colon-d4\_GSM198101.CEL  
123-Colon-d4\_GSM198101.CEL  
124-Colon-d9\_GSM198103.CEL  
125-Colon-d9\_GSM198103.CEL  
126-Colon-d9\_GSM198104.CEL  
127-NALT\_GSM289408.CEL  
128-NALT\_GSM289409.CEL  
129-NALT\_GSM289410.CEL  
130-NALT\_GSM289411.CEL  
131-NALT\_GSM289411.CEL  
132-NALT\_GSM289410.CEL  
133-NALT\_GSM289408.CEL  
134-Colon-d9\_GSM198104.CEL  
135-Colon-d9\_GSM198103.CEL  
136-Colon-d4\_GSM198101.CEL  
137-Colon-d4\_GSM198101.CEL  
138-Intestine-large\_GSM258675.CEL  
139-Intestine-large\_GSM258675.CEL  
140-Intestine-small\_GSM258692.CEL  
141-Intestine-small\_GSM258692.CEL  
142-Lymph-nodes\_GSM258691.CEL  
143-Lymph-nodes\_GSM258691.CEL  
144-Spleen\_GSM258767.CEL  
145-Spleen\_GSM258767.CEL  
146-Spleen\_GSM258768.CEL



Cluster0022\_B cell-related (145 nodes)

3,037.6  
2,877.7  
2,717.9  
2,558  
2,398.1  
2,238.2  
2,078.4  
1,918.5  
1,758.6  
1,598.7  
1,438.9  
1,279  
1,119.1  
959.2  
799.4  
639.5  
479.6  
319.7  
159.9  
0

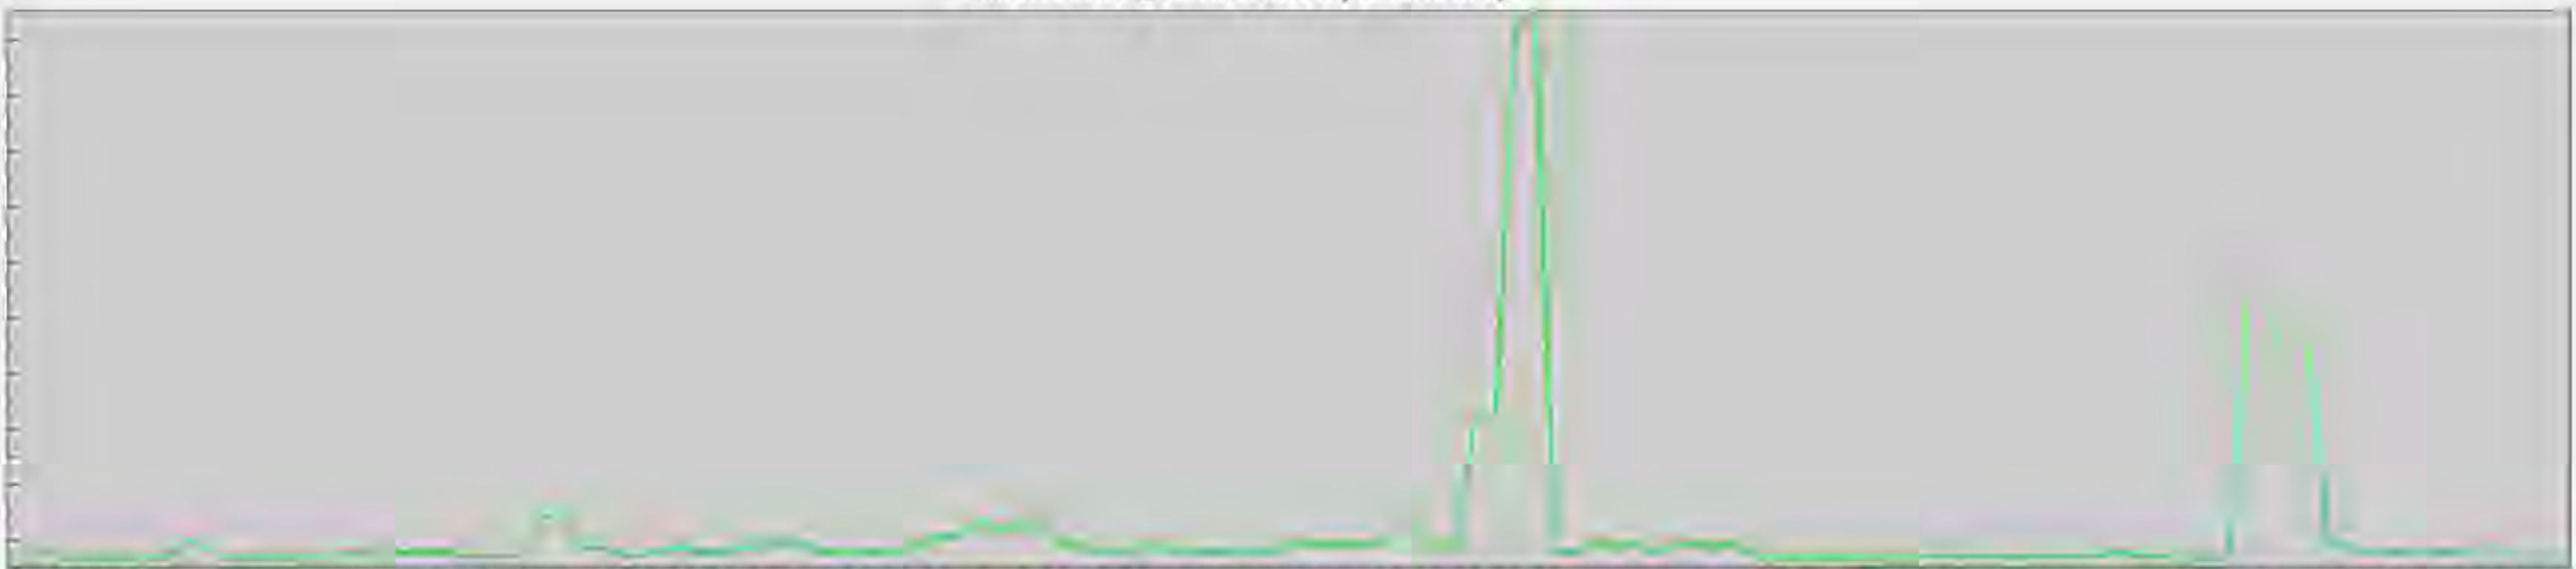

130-NALT GSM289411 CELL  
129-NALT GSM289410 CELL  
128-NALT GSM289409 CELL  
127-NALT GSM289408 CELL  
126-CD9 GSM1988105 CELL  
125-CD9 GSM1988104 CELL  
124-CD9 GSM1988103 CELL  
123-CD9 GSM1988102 CELL  
122-CD9 GSM1988101 CELL  
121-Intestine-large GSM258676 CELL  
120-Intestine-large GSM258675 CELL  
119-Intestine-small GSM258674 CELL  
118-Intestine-small GSM258673 CELL  
117-Lymph-nodes GSM258672 CELL  
116-Spleen GSM258671 CELL  
115-Spleen GSM258670 CELL  
114-Neuro2a GSM258669 CELL  
113-Neuro2a GSM258668 CELL  
112-Astrocytes GSM241898 CELL  
111-Astrocytes GSM241897 CELL  
110-mimb GSM258726 CELL  
109-mimb GSM258725 CELL  
108-MIMCD3 GSM258724 CELL  
107-MIMCD3 GSM258723 CELL  
106-Bruce4 GSM258665 CELL  
105-Bruce4 GSM258664 CELL  
104-C2C12 GSM258663 CELL  
103-C2C12 GSM258662 CELL  
102-NH3T3 GSM258730 CELL  
101-NH3T3 GSM258729 CELL  
100-3T3-L1 GSM258610 CELL  
99-3T3-L1 GSM258609 CELL  
98-10T12 GSM258632 CELL  
97-10T12 GSM258631 CELL  
96-Osteoblast-d21 GSM258740 CELL  
95-Osteoblast-d21 GSM258739 CELL  
94-Osteoblast-d14 GSM258738 CELL  
93-Osteoblast-d14 GSM258737 CELL  
92-Osteoblast-d5 GSM258742 CELL  
91-Osteoblast-d5 GSM258741 CELL  
90-Chondrocytes GSM266741 CELL  
89-Chondrocytes GSM266740 CELL  
88-Nat Helper cell GSM465594 CELL  
87-Nat Helper cell GSM465593 CELL  
86-TT cell GSM465596 CELL  
85-MS-1 GSM234692 CELL  
84-Lymph-endo-cells GSM143704 CELL  
83-P-FDC GSM481977 CELL  
82-P-FDC GSM481978 CELL  
81-P-FDC GSM481976 CELL  
80-L Y RMLNDCC003001 CELL  
79-L Y RMLNDCC003001 CELL  
78-Follicular-B-cells GSM258664 CELL  
77-Follicular-B-cells GSM258663 CELL  
76-MZ-Bcell GSM258622 CELL  
75-MZ-Bcell GSM258621 CELL  
74-BAF3 GSM258620 CELL  
73-BAF3 GSM258619 CELL  
72-Tregs GSM258778 CELL  
71-Tregs GSM258777 CELL  
70-T-cells-CD8+ GSM258776 CELL  
69-T-cells-CD8+ GSM258774 CELL  
68-T-cells-CD4+ GSM258773 CELL  
67-T-cells-CD4+ GSM258772 CELL  
66-Thymocyte-DN GSM465595 CELL  
65-Osteoclasts GSM258743 CELL  
64-Osteoclasts GSM258744 CELL  
63-Microglia GSM258721 CELL  
62-Microglia GSM258721 CELL  
61-MM-LPS-7h GSM258706 CELL  
60-MM-LPS-7h GSM258705 CELL  
59-MM-LPS-6h GSM258702 CELL  
58-MM-LPS-6h GSM258701 CELL  
57-MM-LPS-6h GSM258699 CELL  
56-MM-LPS-6h GSM258699 CELL  
55-MM-LPS-6h GSM258694 CELL  
54-MM-LPS-6h GSM258694 CELL  
53-Iasmacryoid-DC GSM258650 CELL  
52-Iasmacryoid-DC GSM258649 CELL  
51-CD8a-DC GSM258648 CELL  
50-CD8a-DC GSM258647 CELL  
49-CD8a+DC GSM258646 CELL  
48-CD8a+DC GSM258645 CELL  
47-NK-cells GSM258732 CELL  
46-NK-cells GSM258731 CELL  
45-Mast-cells-IgE+Ad GSM258718 CELL  
44-Mast-cells-IgE+Ad GSM258717 CELL  
43-Mast-cells-IgE GSM258714 CELL  
42-Mast-cells-IgE GSM258713 CELL  
41-Mast-cells GSM258712 CELL  
40-Granulocytes GSM258668 CELL  
39-Granulocytes GSM258667 CELL  
38-GMP GSM258666 CELL  
37-GMP GSM258665 CELL  
36-GMP GSM258664 CELL  
35-GMP GSM258642 CELL  
34-MPEP GSM258641 CELL  
33-MPEP GSM258640 CELL  
32-MPEP GSM258770 CELL  
31-HESC GSM258770 CELL  
30-Bone marrow GSM258628 CELL  
29-Bone marrow GSM258627 CELL  
28-Paneth-cells-GF GSM116358 CELL  
27-Paneth-cells-GF GSM116357 CELL  
26-Paneth-cells-GF GSM116350 CELL  
25-Paneth-cells GSM116350 CELL  
24-Paneth-cells GSM116359 CELL  
23-Paneth-cells GSM318589 CELL  
22-Paneth-cells GSM318590 CELL  
21-Colon-Crypt GSM480375 CELL  
20-Colon-Crypt GSM480374 CELL  
19-Colon-Vill GSM480363 CELL  
18-Colon-Vill GSM480362 CELL  
17-Colon-IEC-GF GSM349880 CELL  
16-Colon-IEC-GF GSM350375 CELL  
15-Ileum-IEC-GF GSM350376 CELL  
14-Ileum-IEC GSM350371 CELL  
13-Small-intestine-epithelium RMINEP002001 CELL  
12-Small-intestine-epithelium RMINEP001001 CELL  
11-FAE-RMPYEP002001 CELL  
10-FAE-RMPYEP001001 CELL  
09-Ileum-IEC GSM190797 CELL  
08-Ileum-IEC GSM190796 CELL  
07-Ileum-IEC GSM190795 CELL  
06-CT-v-M-cells GSM190794 CELL  
05-CT-v-M-cells GSM190793 CELL  
04-CT-v-M-cells GSM190792 CELL  
03-PP-M-cells GSM190791 CELL  
02-PP-M-cells GSM190790 CELL  
01-PP-M-cells GSM190789 CELL



Cluster0023\_Mast cell-related (142 nodes)

2,960.5  
2,804.7  
2,648.9  
2,493  
2,337.2  
2,181.4  
2,025.6  
1,869.8  
1,714  
1,558.2  
1,402.3  
1,246.5  
1,090.7  
934.9  
779.1  
623.3  
467.4  
311.8  
155.8  
0

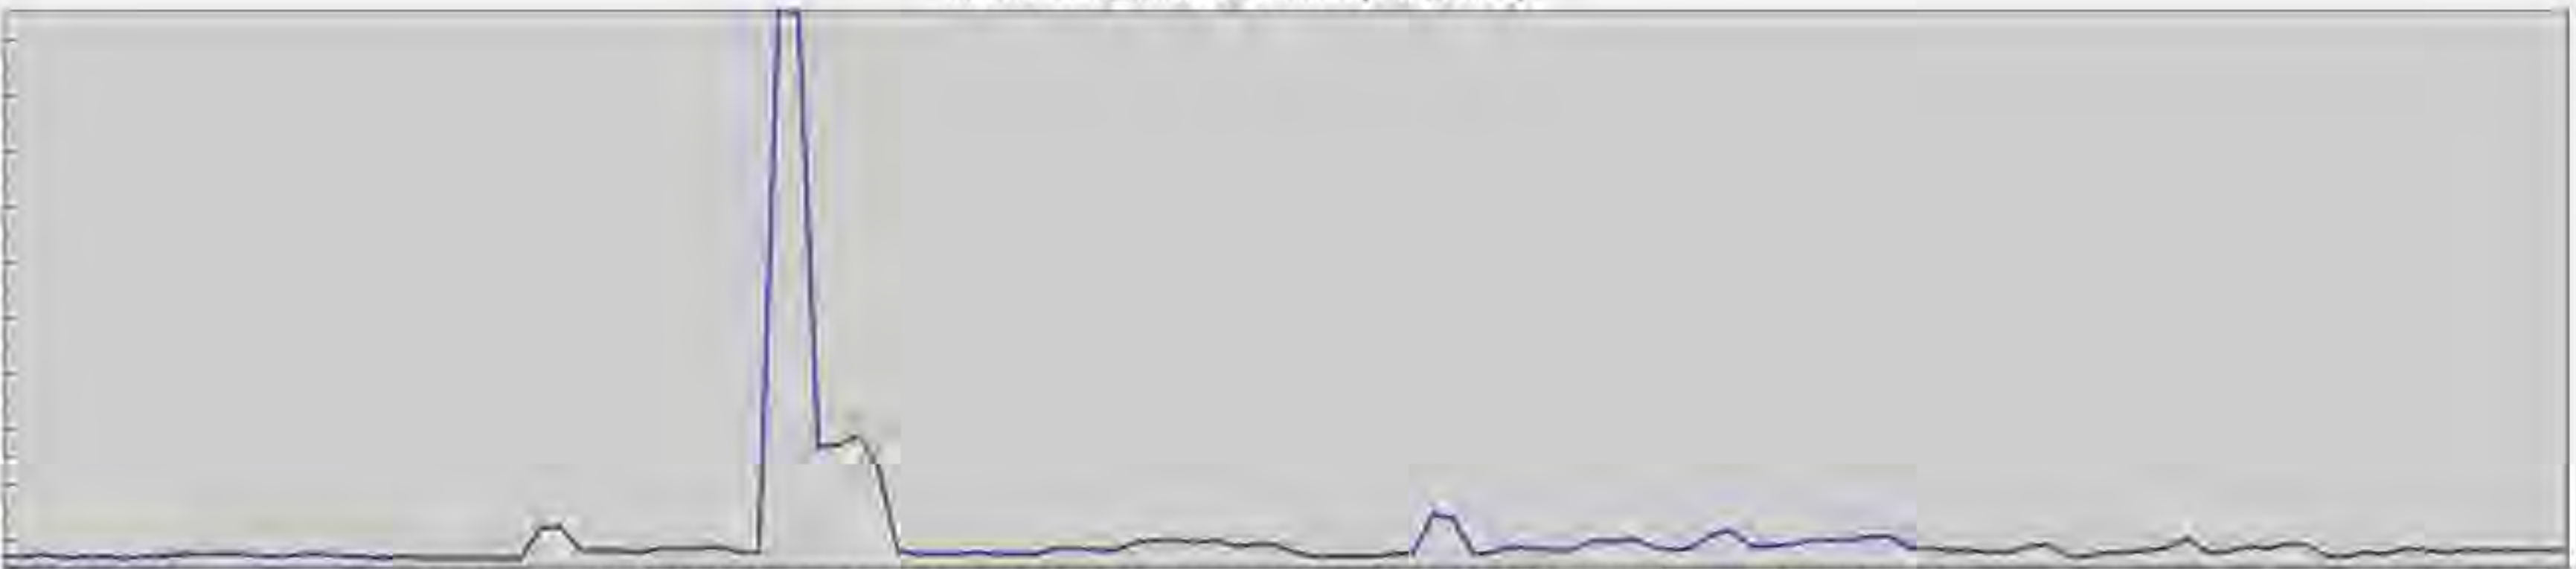

30-NALT GSM289411 CELL  
 129-NALT GSM289410 CELL  
 128-NALT GSM289409 CELL  
 127-NALT GSM289408 CELL  
 126-Color-d9 GSM1988105 CELL  
 125-Color-d9 GSM1988104 CELL  
 124-Color-d9 GSM1988103 CELL  
 123-Color-d4 GSM1988102 CELL  
 122-Color-d4 GSM1988101 CELL  
 121-Intestine-large GSM258676 CELL  
 120-Intestine-large GSM258675 CELL  
 119-Intestine-small GSM258674 CELL  
 118-Intestine-small GSM258673 CELL  
 117-Lymph-nodes GSM258672 CELL  
 116-Lymph-nodes GSM258671 CELL  
 115-Spleen GSM258670 CELL  
 114-Spleen GSM258669 CELL  
 113-Neuro2a GSM241898 CELL  
 112-Neuro2a GSM241897 CELL  
 111-Astrocytes GSM241896 CELL  
 110-mimb GSM2586725 CELL  
 109-mimb GSM2586724 CELL  
 108-MIMCD3 GSM2586723 CELL  
 107-MIMCD3 GSM2586722 CELL  
 106-Bruce4 GSM2586721 CELL  
 105-Bruce4 GSM2586720 CELL  
 104-C2C12 GSM2586719 CELL  
 103-C2C12 GSM2586718 CELL  
 102-NH3T3 GSM2586717 CELL  
 101-NH3T3 GSM2586716 CELL  
 100-3T3-L1 GSM2586715 CELL  
 99-3T3-L1 GSM2586714 CELL  
 98-10T12 GSM2586713 CELL  
 97-10T12 GSM2586712 CELL  
 96-Osteoblast-d21 GSM2586711 CELL  
 95-Osteoblast-d21 GSM2586710 CELL  
 94-Osteoblast-d14 GSM2586709 CELL  
 93-Osteoblast-d14 GSM2586708 CELL  
 92-Osteoblast-d5 GSM2586707 CELL  
 91-Osteoblast-d5 GSM2586706 CELL  
 90-Chondrocytes GSM2586705 CELL  
 89-Chondrocytes GSM2586704 CELL  
 88-Nat Helper cell GSM465594 CELL  
 87-Nat Helper cell GSM465593 CELL  
 86-T cell GSM465592 CELL  
 85-MS-1 GSM234692 CELL  
 84-Lymph-endo-cells GSM143704 CELL  
 83-P-FDC GSM481977 CELL  
 82-P-FDC GSM481976 CELL  
 81-P-FDC GSM481975 CELL  
 80-L-Y RMLNDCC003001 CELL  
 79-L-Y RMLNDCC003001 CELL  
 78-Follicular-Bcells GSM258664 CELL  
 77-Follicular-Bcells GSM258663 CELL  
 76-MZ-Bcell GSM258662 CELL  
 75-MZ-Bcell GSM258661 CELL  
 74-BAF3 GSM258660 CELL  
 73-BAF3 GSM258659 CELL  
 72-Tregs GSM258658 CELL  
 71-Tregs GSM258657 CELL  
 70-T-cells-CD8+ GSM258656 CELL  
 69-T-cells-CD8+ GSM258655 CELL  
 68-T-cells-CD4+ GSM258654 CELL  
 67-T-cells-CD4+ GSM258653 CELL  
 66-Thymocyte-DN GSM465595 CELL  
 65-Osteoclasts GSM258652 CELL  
 64-Osteoclasts GSM258651 CELL  
 63-Microglia GSM258650 CELL  
 62-Microglia GSM258649 CELL  
 61-MM-PS-7h GSM258648 CELL  
 60-MM-PS-7h GSM258647 CELL  
 59-MM-PS-6h GSM258646 CELL  
 58-MM-PS-6h GSM258645 CELL  
 57-MM-LPS-6h GSM258644 CELL  
 56-MM-LPS-6h GSM258643 CELL  
 55-MM-LPS-6h GSM258642 CELL  
 54-MM-LPS-6h GSM258641 CELL  
 53-MM-LPS-6h GSM258640 CELL  
 52-MM-LPS-6h GSM258639 CELL  
 51-Plasmacytoid-DC GSM258638 CELL  
 50-CD8a-DC GSM258637 CELL  
 49-CD8a-DC GSM258636 CELL  
 48-CD8a+DC GSM258635 CELL  
 47-NK-cells GSM258634 CELL  
 46-NK-cells GSM258633 CELL  
 45-Mast-cells-IgE+Ad GSM258632 CELL  
 44-Mast-cells-IgE+Ad GSM258631 CELL  
 43-Mast-cells-IgE GSM258630 CELL  
 42-Mast-cells-IgE GSM258629 CELL  
 41-Mast-cells-IgE GSM258628 CELL  
 40-Granulocytes GSM258627 CELL  
 39-Granulocytes GSM258626 CELL  
 38-MMP GSM258625 CELL  
 37-MMP GSM258624 CELL  
 36-MMP GSM258623 CELL  
 35-MMP GSM258622 CELL  
 34-MMP GSM258621 CELL  
 33-MMP GSM258620 CELL  
 32-MMP GSM258619 CELL  
 31-MMP GSM258618 CELL  
 30-Bone marrow GSM258617 CELL  
 29-Bone marrow GSM258616 CELL  
 28-Paneth-cells-GF-1 GSM116357 CELL  
 27-Paneth-cells-GF-1 GSM116356 CELL  
 26-Paneth-cells-GF-1 GSM116355 CELL  
 25-Paneth-cells-GF-1 GSM116354 CELL  
 24-Paneth-cells-GF-1 GSM116353 CELL  
 23-Paneth-cells-GF-1 GSM116352 CELL  
 22-Paneth-cells-GF-1 GSM116351 CELL  
 21-Color-Crypt GSM480375 CELL  
 20-Color-Crypt GSM480374 CELL  
 19-Color-Vill GSM480363 CELL  
 18-Color-Vill GSM480362 CELL  
 17-Color-IEC-GF GSM349880 CELL  
 16-Color-IEC-GF GSM350375 CELL  
 15-Ileum-IEC-GF GSM350376 CELL  
 14-Ileum-IEC GSM350371 CELL  
 13-Small-intestine-epithelium RMINEP002901 CELL  
 12-Small-intestine-epithelium RMINEP001001 CELL  
 11-FAE-RMPYEP001001 CELL  
 10-FAE-RMPYEP001001 CELL  
 9-Ileum-IEC GSM190797 CELL  
 8-Ileum-IEC GSM190796 CELL  
 7-Ileum-IEC GSM190795 CELL  
 6-CT-w-M-cells GSM190794 CELL  
 5-CT-w-M-cells GSM190793 CELL  
 4-CT-y-M-cells GSM190792 CELL  
 03-PP-M-cells GSM190791 CELL  
 02-PP-M-cells GSM190790 CELL  
 01-PP-M-cells GSM190789 CELL



Cluster0024\_Phagocyte-related (116 nodes)

4,145.4  
3,927.2  
3,709  
3,490.8  
3,272.7  
3,054.5  
2,836.3  
2,618.1  
2,399.9  
2,181.8  
1,963.6  
1,745.4  
1,527.2  
1,309.1  
1,090.9  
872.7  
654.5  
436.4  
218.2  
0

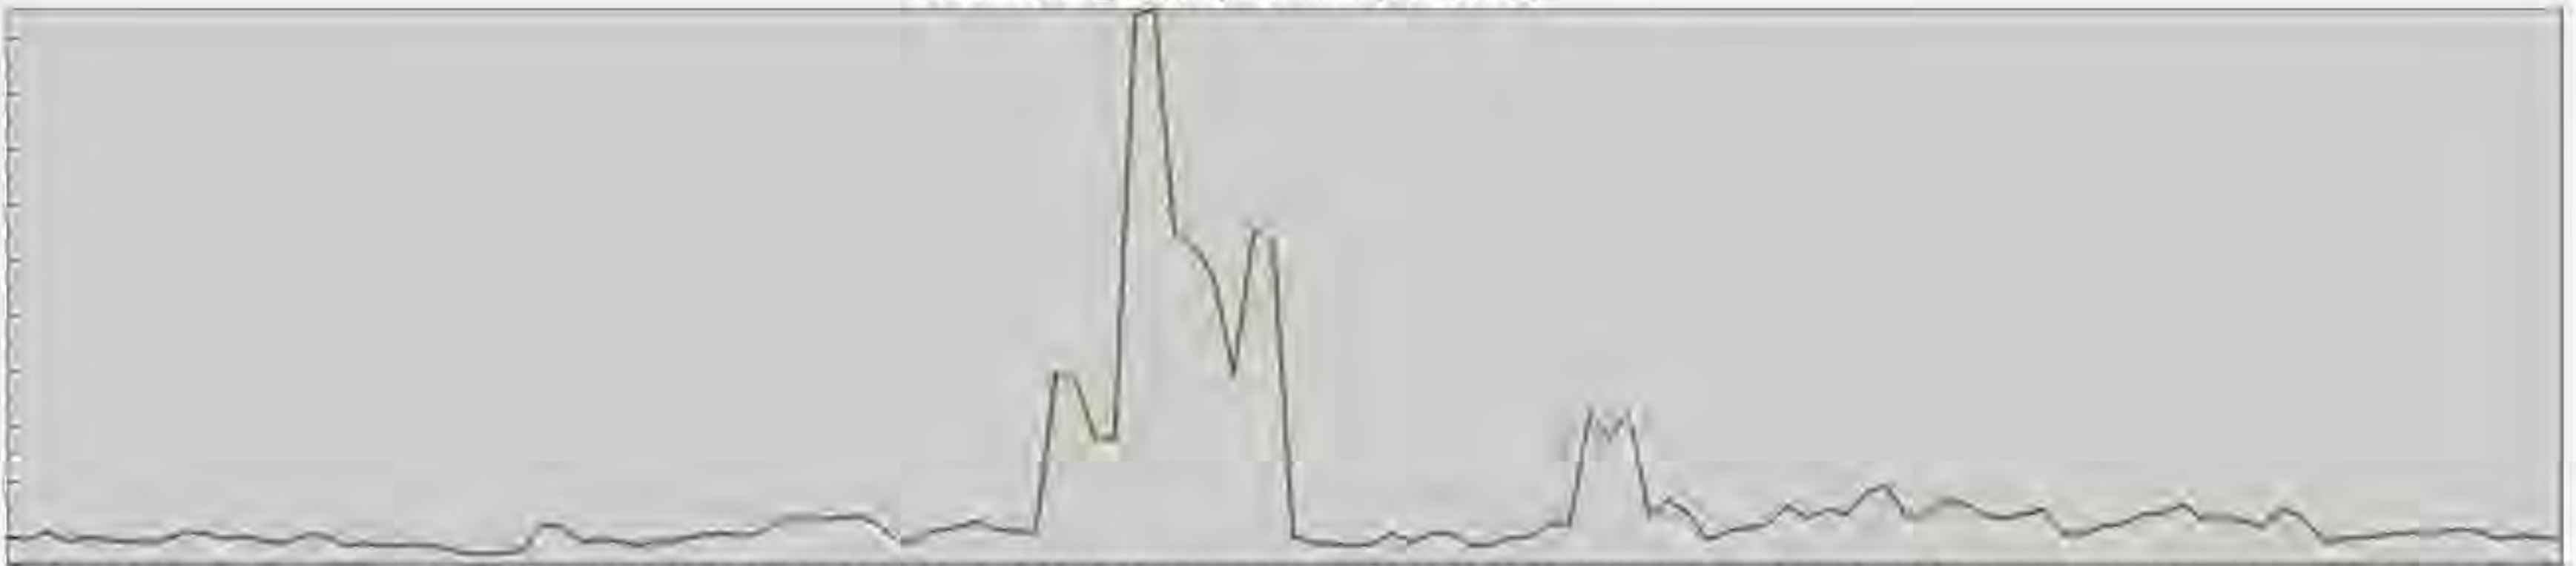

01- PP-M-cells GSM190789.CEL  
 02- PP-M-cells GSM190790.CEL  
 03- PP-M-cells GSM190791.CEL  
 04- CT-v-M-cells GSM190792.CEL  
 05- CT-v-M-cells GSM190793.CEL  
 06- CT-v-M-cells GSM190794.CEL  
 07- Ileum-IEC GSM190795.CEL  
 08- Ileum-IEC GSM190796.CEL  
 09- Ileum-IEC GSM190797.CEL  
 10- FAE-RMPyE001001.CEL  
 11- FAE-RMPyE002001.CEL  
 12- Small-intestine-epithelium\_RMINEP001001.CEL  
 13- Small-intestine-epithelium\_RMINEP002001.CEL  
 14- Ileum-IEC GSM350371.CEL  
 15- Ileum-IEC GSM350375.CEL  
 16- Colon-IEC-Gf GSM349880.CEL  
 17- Colon-IEC-Gf GSM350375.CEL  
 18- Colon-Vill GSM480362.CEL  
 19- Colon-Vill GSM480363.CEL  
 20- Colon-Crypt GSM480374.CEL  
 21- Colon-Crypt GSM480375.CEL  
 22- Paneth-cells GSM318589.CEL  
 23- Paneth-cells GSM318590.CEL  
 24- Paneth-cells GSM116359.CEL  
 25- Paneth-cells GSM116359.CEL  
 26- Paneth-cells-Gf GSM116357.CEL  
 27- Paneth-cells-Gf GSM116358.CEL  
 28- Bone marrow GSM258627.CEL  
 29- Bone marrow GSM258627.CEL  
 30- HSC GSM258770.CEL  
 31- HSC GSM258770.CEL  
 32- MIEP GSM258770.CEL  
 33- MIEP GSM258770.CEL  
 34- MIEP GSM258770.CEL  
 35- CMP GSM258642.CEL  
 36- CMP GSM258642.CEL  
 37- GMP GSM258665.CEL  
 38- GMP GSM258665.CEL  
 39- Granulocytes GSM258667.CEL  
 40- Mast-cells GSM258712.CEL  
 41- Mast-cells GSM258712.CEL  
 42- Mast-cells-Gf GSM258713.CEL  
 43- Mast-cells-Gf GSM258713.CEL  
 44- Mast-cells-Gf+Ad GSM258718.CEL  
 45- Mast-cells-Gf+Ad GSM258718.CEL  
 46- NK-cells GSM258731.CEL  
 47- NK-cells GSM258731.CEL  
 48- CD8a+DC GSM258646.CEL  
 49- CD8a+DC GSM258646.CEL  
 50- CD8a-DC GSM258647.CEL  
 51- CD8a-DC GSM258647.CEL  
 52- Plasmacytoid-DC GSM258650.CEL  
 53- Plasmacytoid-DC GSM258650.CEL  
 54- BMM-GSM258694.CEL  
 55- BMM-GSM258694.CEL  
 56- BMM-LPS-Gn GSM258700.CEL  
 57- BMM-LPS-Gn GSM258700.CEL  
 58- P-MM-LPS-7h GSM268706.CEL  
 59- P-MM-LPS-7h GSM268706.CEL  
 60- P-MM-LPS-7h GSM268706.CEL  
 61- P-MM-LPS-7h GSM268706.CEL  
 62- Microglia GSM258721.CEL  
 63- Microglia GSM258721.CEL  
 64- Osteoclasts GSM258743.CEL  
 65- Osteoclasts GSM258743.CEL  
 66- Thymocyte-DN GSM465595.CEL  
 67- T-cells-CD4+ GSM258773.CEL  
 68- T-cells-CD4+ GSM258773.CEL  
 69- T-cells-CD8+ GSM258776.CEL  
 70- T-cells-CD8+ GSM258776.CEL  
 71- Tregs GSM258778.CEL  
 72- Tregs GSM258778.CEL  
 73- BAF3 GSM258619.CEL  
 74- BAF3 GSM258620.CEL  
 75- MZ-Bcell GSM258621.CEL  
 76- MZ-Bcell GSM258621.CEL  
 77- Follicular-Bcells GSM258664.CEL  
 78- Follicular-Bcells GSM258664.CEL  
 79- E-L-Y-RMLNDC002001.CEL  
 80- E-L-Y-RMLNDC003001.CEL  
 81- PP-FDC GSM481976.CEL  
 82- PP-FDC GSM481976.CEL  
 83- PP-FDC GSM481977.CEL  
 84- Lymph-endo-cells GSM143704.CEL  
 85- MS-1 GSM234692.CEL  
 86- Tt cell GSM465596.CEL  
 87- Nat Helper cell GSM465593.CEL  
 88- Nat Helper cell GSM465594.CEL  
 89- Chondrocytes GSM266741.CEL  
 90- Chondrocytes GSM266741.CEL  
 91- Osteoblast-d5 GSM258741.CEL  
 92- Osteoblast-d5 GSM258742.CEL  
 93- Osteoblast-d14 GSM258737.CEL  
 94- Osteoblast-d14 GSM258738.CEL  
 95- Osteoblast-d21 GSM258739.CEL  
 96- Osteoblast-d21 GSM258739.CEL  
 97- OT12 GSM258631.CEL  
 98- OT12 GSM258631.CEL  
 99- 3T3-L1 GSM258609.CEL  
 100- 3T3-L1 GSM258610.CEL  
 101- NH3T3 GSM258739.CEL  
 102- NH3T3 GSM258739.CEL  
 103- C2C12 GSM258629.CEL  
 104- C2C12 GSM258630.CEL  
 105- Bruce4 GSM258656.CEL  
 106- Bruce4 GSM258656.CEL  
 107- MIMCD3 GSM258723.CEL  
 108- MIMCD3 GSM258723.CEL  
 109- mimb GSM258725.CEL  
 110- mimb GSM258725.CEL  
 111- Astrocytes GSM241898.CEL  
 112- Astrocytes GSM241898.CEL  
 113- Spleen GSM258767.CEL  
 114- Spleen GSM258767.CEL  
 115- Spleen GSM258768.CEL  
 116- Lymph-nodes GSM258691.CEL  
 117- Lymph-nodes GSM258691.CEL  
 118- Intestine-small GSM258679.CEL  
 119- Intestine-small GSM258679.CEL  
 120- Intestine-large GSM258675.CEL  
 121- Intestine-large GSM258675.CEL  
 122- Colon-d4 GSM198101.CEL  
 123- Colon-d4 GSM198101.CEL  
 124- Colon-d9 GSM198103.CEL  
 125- Colon-d9 GSM198103.CEL  
 126- NALT GSM289408.CEL  
 127- NALT GSM289408.CEL  
 128- NALT GSM289410.CEL  
 129- NALT GSM289411.CEL  
 130- NALT GSM289411.CEL



Cluster0025\_Low in some Paneth cells (110 nodes)

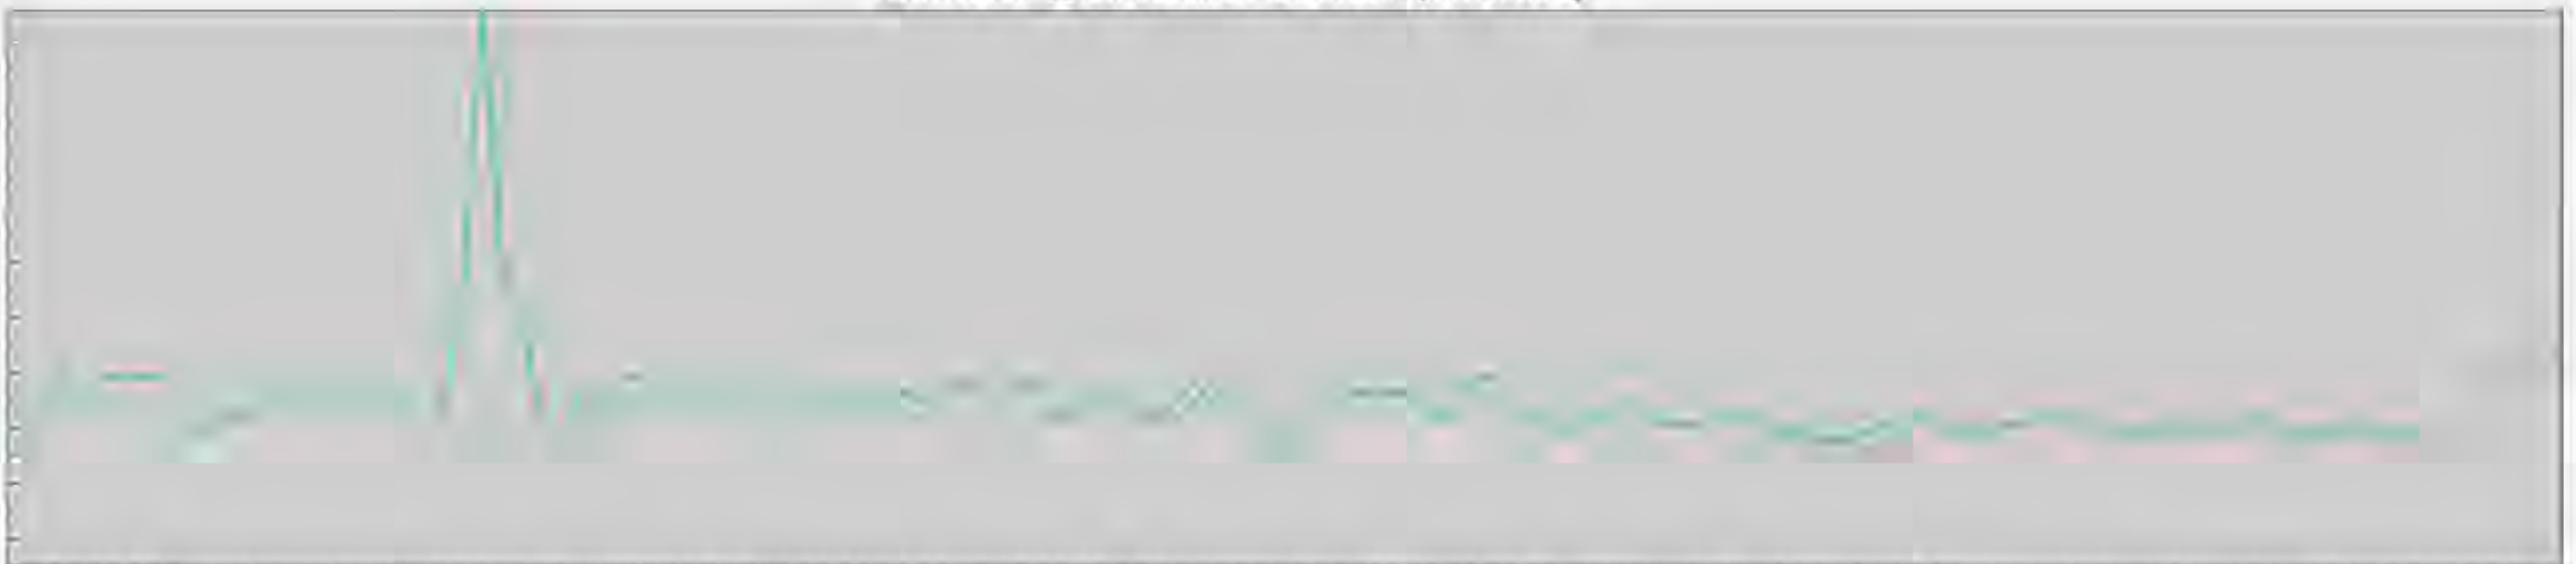

|     |                            |              |     |
|-----|----------------------------|--------------|-----|
| 01  | PP-M-cells                 | GSM190789    | CEL |
| 02  | PP-M-cells                 | GSM190790    | CEL |
| 03  | PP-M-cells                 | GSM190791    | CEL |
| 04  | CT-v-M-cells               | GSM190792    | CEL |
| 05  | CT-v-M-cells               | GSM190793    | CEL |
| 06  | CT-v-M-cells               | GSM190794    | CEL |
| 07  | Ileum-IEC                  | GSM190795    | CEL |
| 08  | Ileum-IEC                  | GSM190796    | CEL |
| 09  | Ileum-IEC                  | GSM190797    | CEL |
| 10  | FAE-RMP                    | GSM190798    | CEL |
| 11  | FAE-RMP                    | GSM190799    | CEL |
| 12  | Small-intestine-epithelium | RMINEP001001 | CEL |
| 13  | Small-intestine-epithelium | RMINEP002001 | CEL |
| 14  | Ileum-IEC                  | GSM350371    | CEL |
| 15  | Ileum-IEC                  | GSM350375    | CEL |
| 16  | Colon-IEC                  | GSM349880    | CEL |
| 17  | Colon-IEC                  | GSM349880    | CEL |
| 18  | Colon-Vill                 | GSM480362    | cel |
| 19  | Colon-Vill                 | GSM480363    | cel |
| 20  | Colon-Crypt                | GSM480374    | cel |
| 21  | Colon-Crypt                | GSM480375    | cel |
| 22  | Paneth-cells               | GSM318589    | CEL |
| 23  | Paneth-cells               | GSM318590    | CEL |
| 24  | Paneth-cells               | GSM116359    | CEL |
| 25  | Paneth-cells               | GSM116359    | CEL |
| 26  | Paneth-cells               | GSM116357    | CEL |
| 27  | Paneth-cells               | GSM116357    | CEL |
| 28  | Bone marrow                | GSM258627    | CEL |
| 29  | Bone marrow                | GSM258627    | CEL |
| 30  | HS-C                       | GSM258770    | CEL |
| 31  | HS-C                       | GSM258770    | CEL |
| 32  | MIEP                       | GSM258770    | CEL |
| 33  | MIEP                       | GSM258770    | CEL |
| 34  | CMP                        | GSM258642    | CEL |
| 35  | CMP                        | GSM258642    | CEL |
| 36  | GMP                        | GSM258665    | CEL |
| 37  | GMP                        | GSM258665    | CEL |
| 38  | GMP                        | GSM258665    | CEL |
| 39  | Granulocytes               | GSM258667    | CEL |
| 40  | Mast-cells                 | GSM258712    | CEL |
| 41  | Mast-cells                 | GSM258712    | CEL |
| 42  | Mast-cells                 | GSM258713    | CEL |
| 43  | Mast-cells                 | GSM258713    | CEL |
| 44  | Mast-cells                 | GSM258714    | CEL |
| 45  | Mast-cells                 | GSM258714    | CEL |
| 46  | NK-cells                   | GSM258731    | CEL |
| 47  | NK-cells                   | GSM258731    | CEL |
| 48  | CD8a+DC                    | GSM258646    | CEL |
| 49  | CD8a+DC                    | GSM258646    | CEL |
| 50  | CD8a-DC                    | GSM258647    | CEL |
| 51  | CD8a-DC                    | GSM258647    | CEL |
| 52  | CD8a-DC                    | GSM258647    | CEL |
| 53  | Plasmacytoid-DC            | GSM258650    | CEL |
| 54  | Plasmacytoid-DC            | GSM258650    | CEL |
| 55  | BM-LPS-6h                  | GSM258694    | CEL |
| 56  | BM-LPS-6h                  | GSM258694    | CEL |
| 57  | BM-LPS-6h                  | GSM258700    | CEL |
| 58  | BM-LPS-7h                  | GSM258702    | CEL |
| 59  | BM-LPS-7h                  | GSM258702    | CEL |
| 60  | BM-LPS-7h                  | GSM258706    | CEL |
| 61  | BM-LPS-7h                  | GSM258706    | CEL |
| 62  | Microglia                  | GSM258721    | CEL |
| 63  | Microglia                  | GSM258721    | CEL |
| 64  | Osteoclasts                | GSM258743    | CEL |
| 65  | Osteoclasts                | GSM258743    | CEL |
| 66  | Thymocyte-DN               | GSM465595    | CEL |
| 67  | T-cells-CD4+               | GSM258773    | CEL |
| 68  | T-cells-CD4+               | GSM258773    | CEL |
| 69  | T-cells-CD8+               | GSM258774    | CEL |
| 70  | T-cells-CD8+               | GSM258774    | CEL |
| 71  | Tregs                      | GSM258778    | CEL |
| 72  | Tregs                      | GSM258778    | CEL |
| 73  | BAF3                       | GSM258619    | CEL |
| 74  | BAF3                       | GSM258620    | CEL |
| 75  | MZ-Bcell                   | GSM258621    | CEL |
| 76  | MZ-Bcell                   | GSM258621    | CEL |
| 77  | Follicular-Bcells          | GSM258664    | CEL |
| 78  | Follicular-Bcells          | GSM258664    | CEL |
| 79  | F-LY-RMLNDC002001          | CEL          |     |
| 80  | F-LY-RMLNDC003001          | CEL          |     |
| 81  | PP-FDC                     | GSM481976    | CEL |
| 82  | PP-FDC                     | GSM481978    | CEL |
| 83  | PP-FDC                     | GSM481978    | CEL |
| 84  | Lymph-endo-cells           | GSM143704    | CEL |
| 85  | MS-1                       | GSM234692    | CEL |
| 86  | Tt cell                    | GSM465596    | CEL |
| 87  | Nat Helper cell            | GSM465593    | CEL |
| 88  | Nat Helper cell            | GSM465594    | CEL |
| 89  | Chondrocytes               | GSM258741    | CEL |
| 90  | Osteoblast-d5              | GSM258741    | CEL |
| 91  | Osteoblast-d5              | GSM258742    | CEL |
| 92  | Osteoblast-d14             | GSM258737    | CEL |
| 93  | Osteoblast-d14             | GSM258737    | CEL |
| 94  | Osteoblast-d21             | GSM258738    | CEL |
| 95  | Osteoblast-d21             | GSM258738    | CEL |
| 96  | Osteoblast-d21             | GSM258631    | CEL |
| 97  | OT12                       | GSM258632    | CEL |
| 98  | OT12                       | GSM258632    | CEL |
| 99  | 3T3-L1                     | GSM258609    | CEL |
| 100 | 3T3-L1                     | GSM258610    | CEL |
| 101 | NH3T3                      | GSM258739    | CEL |
| 102 | NH3T3                      | GSM258739    | CEL |
| 103 | C2C12                      | GSM258629    | CEL |
| 104 | C2C12                      | GSM258630    | CEL |
| 105 | Bruce4                     | GSM258656    | CEL |
| 106 | Bruce4                     | GSM258656    | CEL |
| 107 | MIMCD3                     | GSM258723    | CEL |
| 108 | MIMCD3                     | GSM258723    | CEL |
| 109 | mim6                       | GSM258725    | CEL |
| 110 | mim6                       | GSM258725    | CEL |
| 111 | Astrocytes                 | GSM241898    | CEL |
| 112 | Neuro2a                    | GSM258728    | CEL |
| 113 | Spleen                     | GSM258767    | CEL |
| 114 | Spleen                     | GSM258767    | CEL |
| 115 | Lymph-nodes                | GSM258691    | CEL |
| 116 | Lymph-nodes                | GSM258691    | CEL |
| 117 | Lymph-nodes                | GSM258676    | CEL |
| 118 | Intestine-small            | GSM258677    | CEL |
| 119 | Intestine-small            | GSM258677    | CEL |
| 120 | Intestine-large            | GSM258678    | CEL |
| 121 | Intestine-large            | GSM258678    | CEL |
| 122 | Intestine-large            | GSM258679    | CEL |
| 123 | Colon-d4                   | GSM198810    | CEL |
| 124 | Colon-d4                   | GSM198810    | CEL |
| 125 | Colon-d9                   | GSM198810    | CEL |
| 126 | Colon-d9                   | GSM198810    | CEL |
| 127 | NALT                       | GSM289408    | CEL |
| 128 | NALT                       | GSM289409    | CEL |
| 129 | NALT                       | GSM289410    | CEL |
| 130 | NALT                       | GSM289411    | CEL |



Cluster0026\_High in Min 6 & Neuro2A cells (98 nodes)

635.1  
801.7  
568.2  
534.8  
501.4  
468  
434.5  
401.1  
367.7  
334.3  
300.8  
267.4  
234  
200.6  
167.1  
133.7  
100.3  
66.9  
33.4  
0

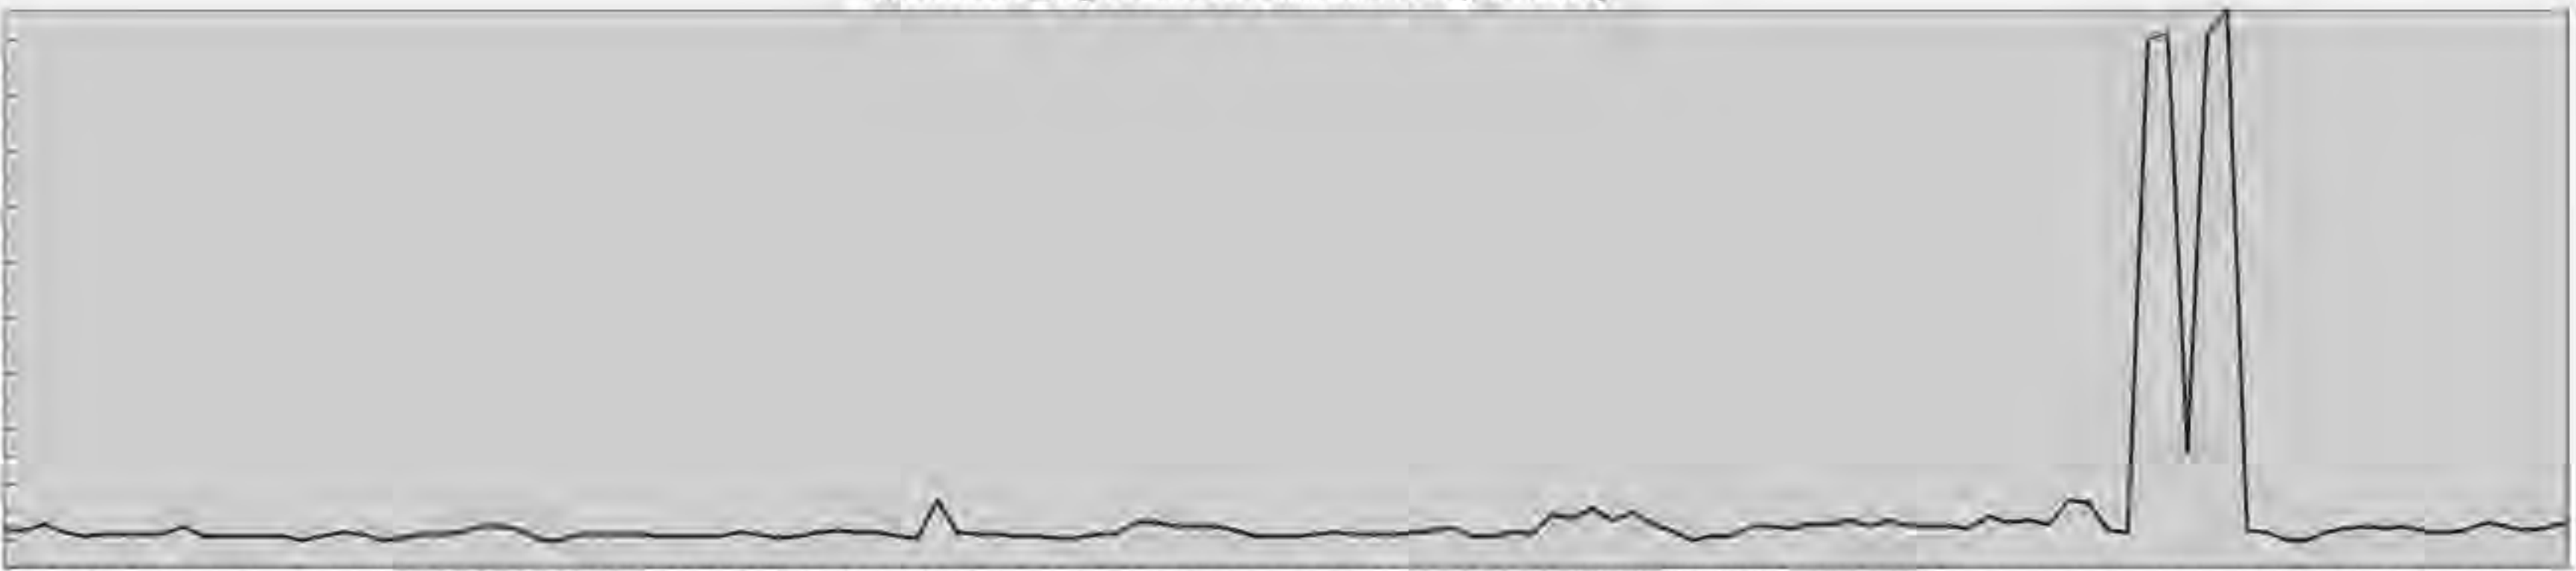

|     |                            |              |     |
|-----|----------------------------|--------------|-----|
| 01  | PP-M-cells                 | GSM190789    | CEL |
| 02  | PP-M-cells                 | GSM190790    | CEL |
| 03  | PP-M-cells                 | GSM190791    | CEL |
| 04  | CT-Y-M-cells               | GSM190792    | CEL |
| 05  | CT-Y-M-cells               | GSM190793    | CEL |
| 06  | CT-W-M-cells               | GSM190794    | CEL |
| 07  | Ileum-IEC                  | GSM190795    | CEL |
| 08  | Ileum-IEC                  | GSM190796    | CEL |
| 09  | Ileum-IEC                  | GSM190797    | CEL |
| 10  | FAE-RMP                    | GSM190798    | CEL |
| 11  | FAE-RMP                    | GSM190799    | CEL |
| 12  | Small-intestine-epithelium | RMINEP001001 | CEL |
| 13  | Small-intestine-epithelium | RMINEP002001 | CEL |
| 14  | Ileum-IEC                  | GSM350371    | CEL |
| 15  | Colon-IEC                  | GSM350375    | CEL |
| 16  | Colon-Vill                 | GSM480362    | cel |
| 17  | Colon-Vill                 | GSM480363    | cel |
| 18  | Colon-Vill                 | GSM480364    | cel |
| 19  | Colon-Crypt                | GSM480374    | cel |
| 20  | Colon-Crypt                | GSM480375    | cel |
| 21  | Colon-Crypt                | GSM480376    | cel |
| 22  | Paneth-cells               | GSM318589    | CEL |
| 23  | Paneth-cells               | GSM318590    | CEL |
| 24  | Paneth-cells               | GSM116359    | CEL |
| 25  | Paneth-cells               | GSM116360    | CEL |
| 26  | Paneth-cells               | GSM116361    | CEL |
| 27  | Paneth-cells               | GSM116362    | CEL |
| 28  | Paneth-cells               | GSM116363    | CEL |
| 29  | Bone marrow                | GSM258677    | CEL |
| 30  | HI-SC                      | GSM258770    | CEL |
| 31  | HI-SC                      | GSM258771    | CEL |
| 32  | MEP                        | GSM258772    | CEL |
| 33  | MEP                        | GSM258773    | CEL |
| 34  | MEP                        | GSM258774    | CEL |
| 35  | MEP                        | GSM258775    | CEL |
| 36  | MEP                        | GSM258776    | CEL |
| 37  | MEP                        | GSM258777    | CEL |
| 38  | MEP                        | GSM258778    | CEL |
| 39  | Granulocytes               | GSM258779    | CEL |
| 40  | Mast-cells                 | GSM258780    | CEL |
| 41  | Mast-cells                 | GSM258781    | CEL |
| 42  | Mast-cells                 | GSM258782    | CEL |
| 43  | Mast-cells                 | GSM258783    | CEL |
| 44  | Mast-cells                 | GSM258784    | CEL |
| 45  | Mast-cells                 | GSM258785    | CEL |
| 46  | NK-cells                   | GSM258786    | CEL |
| 47  | NK-cells                   | GSM258787    | CEL |
| 48  | CD8a+DC                    | GSM258646    | CEL |
| 49  | CD8a+DC                    | GSM258647    | CEL |
| 50  | CD8a+DC                    | GSM258648    | CEL |
| 51  | CD8a+DC                    | GSM258649    | CEL |
| 52  | CD8a+DC                    | GSM258650    | CEL |
| 53  | CD8a+DC                    | GSM258651    | CEL |
| 54  | CD8a+DC                    | GSM258652    | CEL |
| 55  | CD8a+DC                    | GSM258653    | CEL |
| 56  | CD8a+DC                    | GSM258654    | CEL |
| 57  | CD8a+DC                    | GSM258655    | CEL |
| 58  | CD8a+DC                    | GSM258656    | CEL |
| 59  | CD8a+DC                    | GSM258657    | CEL |
| 60  | CD8a+DC                    | GSM258658    | CEL |
| 61  | CD8a+DC                    | GSM258659    | CEL |
| 62  | Microglia                  | GSM258721    | CEL |
| 63  | Microglia                  | GSM258722    | CEL |
| 64  | Microglia                  | GSM258723    | CEL |
| 65  | Osteoclasts                | GSM258743    | CEL |
| 66  | Thymocyte-DN               | GSM465595    | CEL |
| 67  | T-cells-CD4+               | GSM258773    | CEL |
| 68  | T-cells-CD4+               | GSM258774    | CEL |
| 69  | T-cells-CD8+               | GSM258775    | CEL |
| 70  | T-cells-CD8+               | GSM258776    | CEL |
| 71  | Tregs                      | GSM258777    | CEL |
| 72  | Tregs                      | GSM258778    | CEL |
| 73  | BAF3                       | GSM258619    | CEL |
| 74  | BAF3                       | GSM258620    | CEL |
| 75  | MZ-Bcell                   | GSM258621    | CEL |
| 76  | MZ-Bcell                   | GSM258622    | CEL |
| 77  | Follicular-B-cells         | GSM258664    | CEL |
| 78  | Follicular-B-cells         | GSM258665    | CEL |
| 79  | F-LY-RMLND                 | C002001      | CEL |
| 80  | F-LY-RMLND                 | C003001      | CEL |
| 81  | PP-FDC                     | GSM481976    | CEL |
| 82  | PP-FDC                     | GSM481977    | CEL |
| 83  | PP-FDC                     | GSM481978    | CEL |
| 84  | Lymph-endo-cells           | GSM143704    | CEL |
| 85  | MS-1                       | GSM234692    | CEL |
| 86  | TI cell                    | GSM465596    | CEL |
| 87  | Nat Helper cell            | GSM465593    | CEL |
| 88  | Nat Helper cell            | GSM465594    | CEL |
| 89  | Chondrocytes               | GSM266741    | CEL |
| 90  | Osteoblast-d5              | GSM258741    | CEL |
| 91  | Osteoblast-d5              | GSM258742    | CEL |
| 92  | Osteoblast-d14             | GSM258737    | CEL |
| 93  | Osteoblast-d14             | GSM258738    | CEL |
| 94  | Osteoblast-d21             | GSM258739    | CEL |
| 95  | Osteoblast-d21             | GSM258740    | CEL |
| 96  | Osteoblast-d21             | GSM258741    | CEL |
| 97  | OT12                       | GSM258631    | CEL |
| 98  | OT12                       | GSM258632    | CEL |
| 99  | OT12                       | GSM258633    | CEL |
| 100 | 3T3-L1                     | GSM258610    | CEL |
| 101 | NH3T3                      | GSM258739    | CEL |
| 102 | NH3T3                      | GSM258730    | CEL |
| 103 | C2C12                      | GSM258629    | CEL |
| 104 | C2C12                      | GSM258630    | CEL |
| 105 | Bruce4                     | GSM258656    | CEL |
| 106 | Bruce4                     | GSM258657    | CEL |
| 107 | MIMCD3                     | GSM258723    | CEL |
| 108 | MIMCD3                     | GSM258724    | CEL |
| 109 | mim6                       | GSM258725    | CEL |
| 110 | mim6                       | GSM258726    | CEL |
| 111 | Astrocytes                 | GSM241898    | CEL |
| 112 | Neuro2a                    | GSM258727    | CEL |
| 113 | Spleen                     | GSM258767    | CEL |
| 114 | Spleen                     | GSM258768    | CEL |
| 115 | Lymph-nodes                | GSM258691    | CEL |
| 116 | Lymph-nodes                | GSM258692    | CEL |
| 117 | Lymph-nodes                | GSM258693    | CEL |
| 118 | Intestine-small            | GSM258677    | CEL |
| 119 | Intestine-large            | GSM258678    | CEL |
| 120 | Intestine-large            | GSM258679    | CEL |
| 121 | Intestine-large            | GSM258676    | CEL |
| 122 | Intestine-large            | GSM258675    | CEL |
| 123 | Colon-d4                   | GSM198810    | CEL |
| 124 | Colon-d4                   | GSM198811    | CEL |
| 125 | Colon-d9                   | GSM198812    | CEL |
| 126 | Colon-d9                   | GSM198813    | CEL |
| 127 | Colon-d9                   | GSM198814    | CEL |
| 128 | NALT                       | GSM289408    | CEL |
| 129 | NALT                       | GSM289409    | CEL |
| 130 | NALT                       | GSM289410    | CEL |
| 131 | NALT                       | GSM289411    | CEL |



Cluster0027\_Mast cell-related (B6 nodes)

1,630.7  
1,544.9  
1,459  
1,373.2  
1,287.4  
1,201.6  
1,115.7  
1,029.9  
944.1  
858.3  
772.4  
686.6  
600.8  
515  
429.1  
343.3  
257.5  
171.7  
85.8  
0

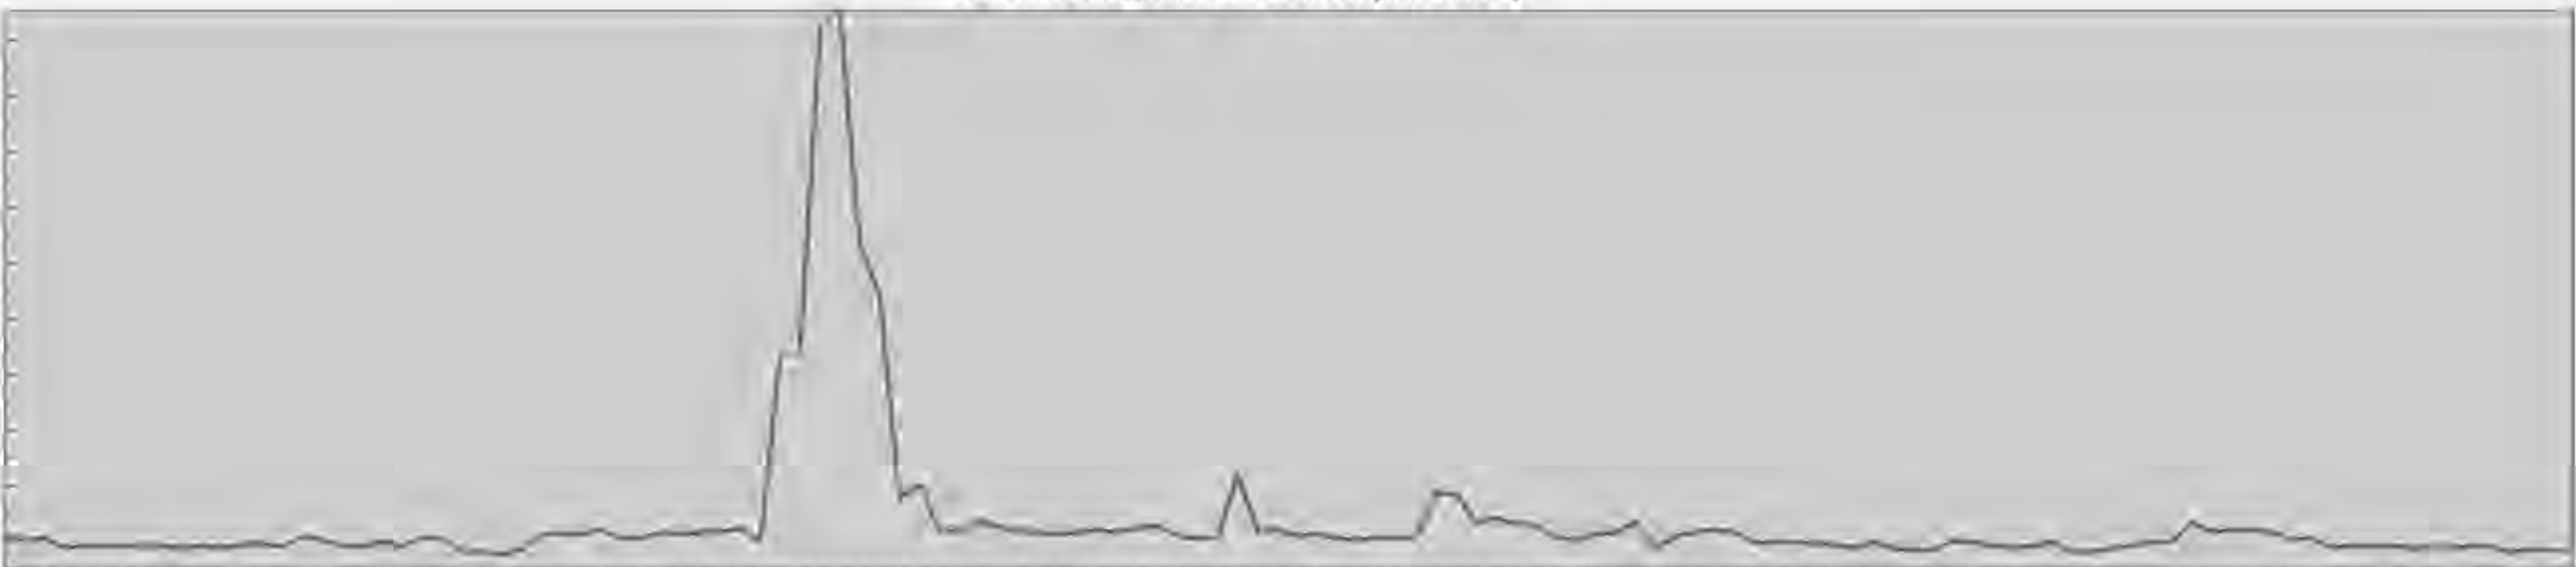

30-NALT GSM289411 CELL  
129-NALT GSM289410 CELL  
128-NALT GSM289409 CELL  
127-NALT GSM289408 CELL  
126-Color-d9 GSM1988105 CELL  
125-Color-d9 GSM1988104 CELL  
124-Color-d9 GSM1988103 CELL  
123-Color-d4 GSM1988102 CELL  
122-Color-d4 GSM1988101 CELL  
121-Intestine-large GSM258676 CELL  
120-Intestine-large GSM258675 CELL  
119-Intestine-small GSM258674 CELL  
118-Intestine-small GSM258673 CELL  
117-Lymph-nodes GSM258672 CELL  
116-Spleen GSM258671 CELL  
115-Spleen GSM258670 CELL  
114-Neuro2a GSM258669 CELL  
113-Neuro2a GSM258668 CELL  
112-Astrocytes GSM241898 CELL  
111-mimb GSM258667 CELL  
110-mimb GSM258666 CELL  
109-mimb GSM258665 CELL  
108-MIMCD3 GSM258664 CELL  
107-MIMCD3 GSM258663 CELL  
106-Bruce4 GSM258662 CELL  
105-Bruce4 GSM258661 CELL  
104-C2C12 GSM258660 CELL  
103-C2C12 GSM258659 CELL  
102-NH3T3 GSM258658 CELL  
101-NH3T3 GSM258657 CELL  
100-3T3-L1 GSM258656 CELL  
99-3T3-L1 GSM258655 CELL  
98-10T12 GSM258654 CELL  
97-10T12 GSM258653 CELL  
96-Osteoblast-d21 GSM258652 CELL  
95-Osteoblast-d21 GSM258651 CELL  
94-Osteoblast-d14 GSM258650 CELL  
93-Osteoblast-d14 GSM258649 CELL  
92-Osteoblast-d5 GSM258648 CELL  
91-Osteoblast-d5 GSM258647 CELL  
90-Chondrocytes GSM258646 CELL  
89-Chondrocytes GSM258645 CELL  
88-Nat Helper cell GSM465594 CELL  
87-Nat Helper cell GSM465593 CELL  
86-T cell GSM465592 CELL  
85-MS-1 GSM234692 CELL  
84-Lymph-endc-cells GSM143704 CELL  
83-P-FDC GSM481977 CELL  
82-P-FDC GSM481976 CELL  
81-P-FDC GSM481975 CELL  
80-L-Y-RMLNDCC003001 CELL  
79-L-Y-RMLNDCC003001 CELL  
78-Follicular-Bcells GSM258664 CELL  
77-Follicular-Bcells GSM258663 CELL  
76-MZ-Bcell GSM258662 CELL  
75-MZ-Bcell GSM258661 CELL  
74-BAF3 GSM258660 CELL  
73-BAF3 GSM258659 CELL  
72-Tregs GSM258658 CELL  
71-Tregs GSM258657 CELL  
70-T-cells-CD8+ GSM258656 CELL  
69-T-cells-CD8+ GSM258655 CELL  
68-T-cells-CD4+ GSM258654 CELL  
67-T-cells-CD4+ GSM258653 CELL  
66-Thymocyte-DN GSM465595 CELL  
65-Osteoclasts GSM258652 CELL  
64-Osteoclasts GSM258651 CELL  
63-Microglia GSM258650 CELL  
62-Microglia GSM258649 CELL  
61-MM-PS-7h GSM258648 CELL  
60-MM-PS-7h GSM258647 CELL  
59-MM-PS-6h GSM258646 CELL  
58-MM-PS-6h GSM258645 CELL  
57-MM-LPS-6h GSM258644 CELL  
56-MM-LPS-6h GSM258643 CELL  
55-MM-LPS-6h GSM258642 CELL  
54-MM-LPS-6h GSM258641 CELL  
53-Plasmacytoid-DC GSM258640 CELL  
52-Plasmacytoid-DC GSM258639 CELL  
51-CD8a-DC GSM258638 CELL  
50-CD8a-DC GSM258637 CELL  
49-CD8a+DC GSM258636 CELL  
48-CD8a+DC GSM258635 CELL  
47-NK-cells GSM258634 CELL  
46-NK-cells GSM258633 CELL  
45-Mast-cells-IdE+Ad GSM258632 CELL  
44-Mast-cells-IdE+Ad GSM258631 CELL  
43-Mast-cells-IdE GSM258630 CELL  
42-Mast-cells-IdE GSM258629 CELL  
41-Mast-cells GSM258628 CELL  
40-Granulocytes GSM258627 CELL  
39-Granulocytes GSM258626 CELL  
38-MP GSM258625 CELL  
37-MP GSM258624 CELL  
36-MP GSM258623 CELL  
35-MP GSM258622 CELL  
34-MEP GSM258621 CELL  
33-MEP GSM258620 CELL  
32-HESC GSM258619 CELL  
31-HESC GSM258618 CELL  
30-Bone marrow GSM258617 CELL  
29-Bone marrow GSM258616 CELL  
28-paneth-cells-GE GSM116358 CELL  
27-paneth-cells-GE GSM116357 CELL  
26-paneth-cells-GE GSM116356 CELL  
25-paneth-cells GSM116355 CELL  
24-paneth-cells GSM116354 CELL  
23-paneth-cells GSM318589 CELL  
22-paneth-cells GSM318590 CELL  
21-paneth-cells GSM318591 CELL  
20-Colon-Crypt GSM480375 CELL  
19-Colon-Crypt GSM480374 CELL  
18-Colon-Vill GSM480363 CELL  
17-Colon-Vill GSM480362 CELL  
16-Colon-IEC-GE GSM349880 CELL  
15-Colon-IEC-GE GSM350375 CELL  
14-Ileum-IEC GSM350376 CELL  
13-Small-intestine-epithelium RMINEP002901 CELL  
12-Small-intestine-epithelium RMINEP001001 CELL  
11-FAE-RMPYEP002001 CELL  
10-FAE-RMPYEP001001 CELL  
09-Ileum-IEC GSM190797 CELL  
08-Ileum-IEC GSM190796 CELL  
07-Ileum-IEC GSM190795 CELL  
06-CT-w-cells GSM190794 CELL  
05-CT-w-cells GSM190793 CELL  
04-CT-y-w-cells GSM190792 CELL  
03-PP-M-cells GSM190791 CELL  
02-PP-M-cells GSM190790 CELL  
01-PP-M-cells GSM190789 CELL



Cluster0028\_High in Peyer's patch FDC (85 nodes)

2,295.6  
2,174.7  
2,063.9  
1,933.1  
1,812.3  
1,691.5  
1,570.6  
1,449.8  
1,329  
1,208.2  
1,087.4  
966.6  
845.7  
724.9  
604.1  
483.3  
362.5  
241.6  
120.8  
0

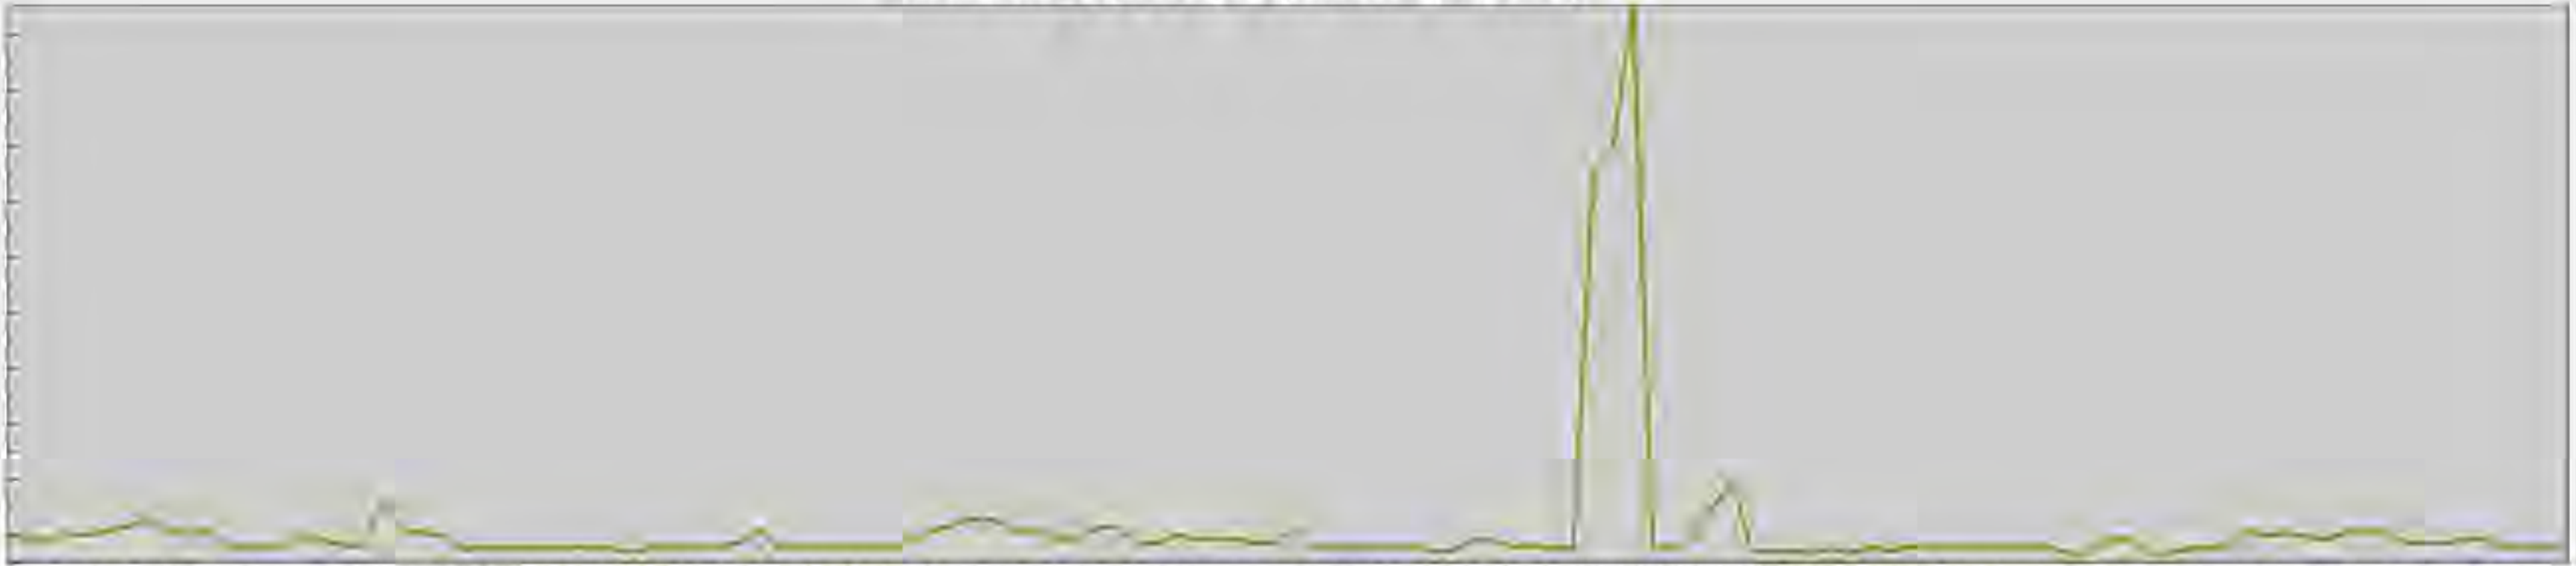

|     |                            |              |     |
|-----|----------------------------|--------------|-----|
| 01  | PP-M-cells                 | GSM190789    | CEL |
| 02  | PP-M-cells                 | GSM190790    | CEL |
| 03  | PP-M-cells                 | GSM190791    | CEL |
| 04  | CT-v-M-cells               | GSM190792    | CEL |
| 05  | CT-v-M-cells               | GSM190793    | CEL |
| 06  | CT-v-M-cells               | GSM190794    | CEL |
| 07  | Ileum-IEC                  | GSM190795    | CEL |
| 08  | Ileum-IEC                  | GSM190796    | CEL |
| 09  | Ileum-IEC                  | GSM190797    | CEL |
| 10  | FAE-RMP                    | GSM190798    | CEL |
| 11  | FAE-RMP                    | GSM190799    | CEL |
| 12  | Small intestine-epithelium | RMINEP001001 | CEL |
| 13  | Small intestine-epithelium | RMINEP002001 | CEL |
| 14  | Ileum-IEC                  | GSM350371    | CEL |
| 15  | Colon-IEC                  | GSM350375    | CEL |
| 16  | Colon-Vill                 | GSM480362    | cel |
| 17  | Colon-Vill                 | GSM480363    | cel |
| 18  | Colon-Vill                 | GSM480364    | cel |
| 19  | Colon-Crypt                | GSM480374    | cel |
| 20  | Colon-Crypt                | GSM480375    | cel |
| 21  | Colon-Crypt                | GSM480376    | cel |
| 22  | Paneth-cells               | GSM318589    | CEL |
| 23  | Paneth-cells               | GSM318590    | CEL |
| 24  | Paneth-cells               | GSM116359    | CEL |
| 25  | Paneth-cells               | GSM116360    | CEL |
| 26  | Paneth-cells               | GSM116357    | CEL |
| 27  | Paneth-cells               | GSM116358    | CEL |
| 28  | Bone marrow                | GSM258627    | CEL |
| 29  | Bone marrow                | GSM258628    | CEL |
| 30  | HS                         | GSM258770    | CEL |
| 31  | HS                         | GSM258771    | CEL |
| 32  | HS                         | GSM258772    | CEL |
| 33  | MEP                        | GSM258773    | CEL |
| 34  | MEP                        | GSM258774    | CEL |
| 35  | MEP                        | GSM258775    | CEL |
| 36  | GMP                        | GSM258665    | CEL |
| 37  | GMP                        | GSM258666    | CEL |
| 38  | GMP                        | GSM258667    | CEL |
| 39  | Granulocytes               | GSM258668    | CEL |
| 40  | Granulocytes               | GSM258771    | CEL |
| 41  | Mast-cells                 | GSM258772    | CEL |
| 42  | Mast-cells                 | GSM258773    | CEL |
| 43  | Mast-cells                 | GSM258774    | CEL |
| 44  | Mast-cells                 | GSM258775    | CEL |
| 45  | Mast-cells                 | GSM258776    | CEL |
| 46  | NK-cells                   | GSM258777    | CEL |
| 47  | NK-cells                   | GSM258778    | CEL |
| 48  | CD8a+DC                    | GSM258646    | CEL |
| 49  | CD8a+DC                    | GSM258647    | CEL |
| 50  | CD8a+DC                    | GSM258648    | CEL |
| 51  | CD8a+DC                    | GSM258649    | CEL |
| 52  | CD8a+DC                    | GSM258650    | CEL |
| 53  | CD8a+DC                    | GSM258651    | CEL |
| 54  | CD8a+DC                    | GSM258652    | CEL |
| 55  | CD8a+DC                    | GSM258653    | CEL |
| 56  | CD8a+DC                    | GSM258654    | CEL |
| 57  | CD8a+DC                    | GSM258655    | CEL |
| 58  | CD8a+DC                    | GSM258656    | CEL |
| 59  | CD8a+DC                    | GSM258657    | CEL |
| 60  | CD8a+DC                    | GSM258658    | CEL |
| 61  | CD8a+DC                    | GSM258659    | CEL |
| 62  | Microglia                  | GSM258721    | CEL |
| 63  | Microglia                  | GSM258722    | CEL |
| 64  | Microglia                  | GSM258723    | CEL |
| 65  | Osteoclasts                | GSM258743    | CEL |
| 66  | Osteoclasts                | GSM258744    | CEL |
| 67  | T-cells-CD4+               | GSM258773    | CEL |
| 68  | T-cells-CD4+               | GSM258774    | CEL |
| 69  | T-cells-CD8+               | GSM258775    | CEL |
| 70  | T-cells-CD8+               | GSM258776    | CEL |
| 71  | Tregs                      | GSM258777    | CEL |
| 72  | Tregs                      | GSM258778    | CEL |
| 73  | BAF3                       | GSM258620    | CEL |
| 74  | BAF3                       | GSM258621    | CEL |
| 75  | MZ-Bcell                   | GSM258622    | CEL |
| 76  | MZ-Bcell                   | GSM258623    | CEL |
| 77  | Follicular-Bcells          | GSM258664    | CEL |
| 78  | Follicular-Bcells          | GSM258665    | CEL |
| 79  | F-LY                       | RMLNDC002001 | CEL |
| 80  | F-LY                       | RMLNDC003001 | CEL |
| 81  | PP-FDC                     | GSM481976    | CEL |
| 82  | PP-FDC                     | GSM481977    | CEL |
| 83  | PP-FDC                     | GSM481978    | CEL |
| 84  | Lymph-endo-cells           | GSM143704    | CEL |
| 85  | MS-1                       | GSM234692    | CEL |
| 86  | Nat Helper cell            | GSM465593    | CEL |
| 87  | Nat Helper cell            | GSM465594    | CEL |
| 88  | Chondrocytes               | GSM258741    | CEL |
| 89  | Chondrocytes               | GSM258742    | CEL |
| 90  | Osteoblast-d5              | GSM258741    | CEL |
| 91  | Osteoblast-d5              | GSM258742    | CEL |
| 92  | Osteoblast-d14             | GSM258737    | CEL |
| 93  | Osteoblast-d14             | GSM258738    | CEL |
| 94  | Osteoblast-d21             | GSM258739    | CEL |
| 95  | Osteoblast-d21             | GSM258740    | CEL |
| 96  | Osteoblast-d21             | GSM258631    | CEL |
| 97  | OT12                       | GSM258632    | CEL |
| 98  | OT12                       | GSM258633    | CEL |
| 99  | 3T3-L1                     | GSM258609    | CEL |
| 100 | 3T3-L1                     | GSM258610    | CEL |
| 101 | NH3T3                      | GSM258739    | CEL |
| 102 | NH3T3                      | GSM258740    | CEL |
| 103 | C2C12                      | GSM258629    | CEL |
| 104 | C2C12                      | GSM258630    | CEL |
| 105 | Bruce4                     | GSM258656    | CEL |
| 106 | Bruce4                     | GSM258657    | CEL |
| 107 | MIMCD3                     | GSM258723    | CEL |
| 108 | MIMCD3                     | GSM258724    | CEL |
| 109 | mim6                       | GSM258725    | CEL |
| 110 | mim6                       | GSM258726    | CEL |
| 111 | Astrocytes                 | GSM241898    | CEL |
| 112 | Neuro2a                    | GSM258727    | CEL |
| 113 | Spleen                     | GSM258728    | CEL |
| 114 | Spleen                     | GSM258729    | CEL |
| 115 | Lymph-nodes                | GSM258691    | CEL |
| 116 | Lymph-nodes                | GSM258692    | CEL |
| 117 | Lymph-nodes                | GSM258693    | CEL |
| 118 | Intestine-small            | GSM258677    | CEL |
| 119 | Intestine-small            | GSM258678    | CEL |
| 120 | Intestine-large            | GSM258679    | CEL |
| 121 | Intestine-large            | GSM258680    | CEL |
| 122 | Intestine-large            | GSM258681    | CEL |
| 123 | Colon-d4                   | GSM198810    | CEL |
| 124 | Colon-d4                   | GSM198811    | CEL |
| 125 | Colon-d9                   | GSM198812    | CEL |
| 126 | Colon-d9                   | GSM198813    | CEL |
| 127 | NALT                       | GSM289408    | CEL |
| 128 | NALT                       | GSM289409    | CEL |
| 129 | NALT                       | GSM289410    | CEL |
| 130 | NALT                       | GSM289411    | CEL |



Cluster0029\_Lymphatic endothelium-related (82 nodes)

1,662.7  
1,565.7  
1,478.8  
1,391.8  
1,304.8  
1,217.8  
1,130.8  
1,043.8  
958.8  
869.9  
782.9  
695.9  
608.9  
521.9  
434.9  
347.9  
261  
174  
87  
0

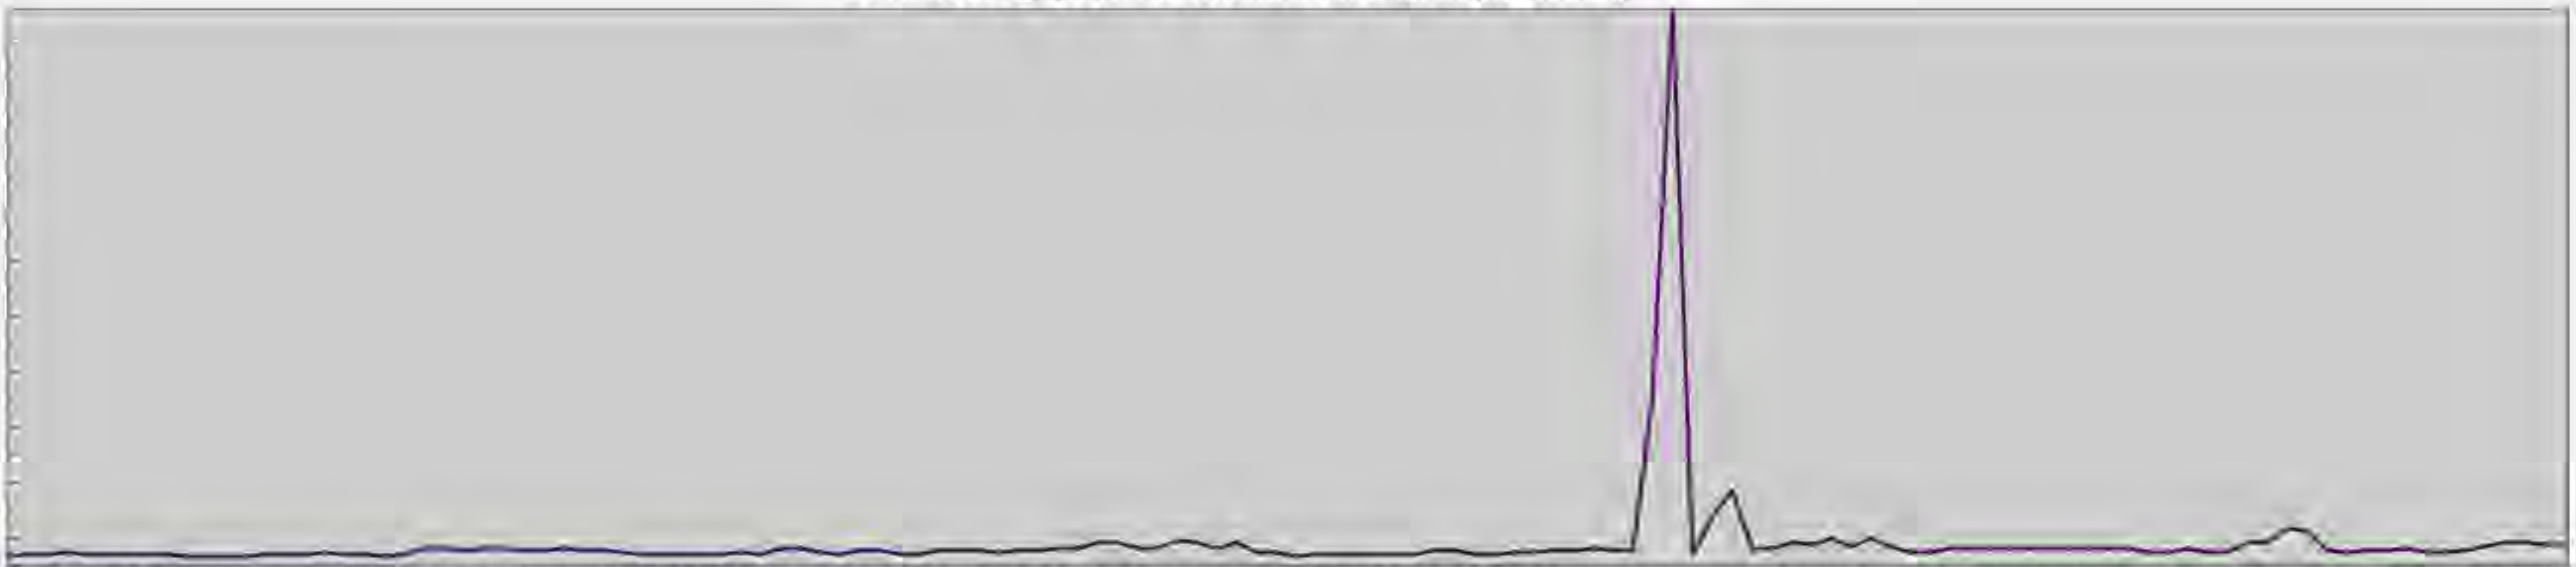

30-NALT GSM289411 CELL  
 129-NALT GSM289410 CELL  
 128-NALT GSM289409 CELL  
 127-NALT GSM289408 CELL  
 126-Color-d9 GSM1988105 CELL  
 125-Color-d9 GSM1988104 CELL  
 124-Color-d9 GSM1988103 CELL  
 123-Color-d4 GSM1988102 CELL  
 122-Color-d4 GSM1988101 CELL  
 121-Intestine-large GSM258676 CELL  
 120-Intestine-large GSM258675 CELL  
 119-Intestine-small GSM258674 CELL  
 118-Intestine-small GSM258673 CELL  
 117-Lymph-nodes GSM258672 CELL  
 116-Spleen GSM258671 CELL  
 115-Spleen GSM258670 CELL  
 114-Neuro2a GSM258669 CELL  
 113-Neuro2a GSM241898 CELL  
 111-Astrocytes GSM241897 CELL  
 110-mimb GSM2586725 CELL  
 109-mimb GSM2586724 CELL  
 108-MIMCD3 GSM2586723 CELL  
 107-MIMCD3 GSM2586722 CELL  
 106-Bruce4 GSM2586721 CELL  
 105-Bruce4 GSM2586720 CELL  
 104-C2C12 GSM2586719 CELL  
 103-C2C12 GSM2586718 CELL  
 102-NH3T3 GSM2586717 CELL  
 101-NH3T3 GSM2586716 CELL  
 100-3T3-L1 GSM2586715 CELL  
 99-3T3-L1 GSM2586714 CELL  
 98-10T12 GSM2586713 CELL  
 97-10T12 GSM2586712 CELL  
 96-Osteoblast-d21 GSM2586711 CELL  
 95-Osteoblast-d21 GSM2586710 CELL  
 94-Osteoblast-d14 GSM2586709 CELL  
 93-Osteoblast-d14 GSM2586708 CELL  
 92-Osteoblast-d5 GSM2586707 CELL  
 91-Osteoblast-d5 GSM2586706 CELL  
 90-Chondrocytes GSM2586705 CELL  
 88-Chondrocytes GSM2586704 CELL  
 87-Nat Helper cell GSM465593 CELL  
 86-Nat Helper cell GSM465592 CELL  
 85-MS-1 GSM234692 CELL  
 84-Lymph-endo-cells GSM143704 CELL  
 83-PP-FDC GSM481977 CELL  
 82-PP-FDC GSM481976 CELL  
 81-PP-FDC GSM481975 CELL  
 80-L-Y-RMLNDCC003001 CELL  
 79-L-Y-RMLNDCC003001 CELL  
 78-Follicular-Bcells GSM258664 CELL  
 77-Follicular-Bcells GSM258663 CELL  
 76-MZ-Bcell GSM258662 CELL  
 75-MZ-Bcell GSM258661 CELL  
 74-BAF3 GSM258660 CELL  
 73-BAF3 GSM258659 CELL  
 72-Tregs GSM258658 CELL  
 71-Tregs GSM258657 CELL  
 70-T-cells-CD8+ GSM258656 CELL  
 69-T-cells-CD8+ GSM258655 CELL  
 68-T-cells-CD4+ GSM258654 CELL  
 67-T-cells-CD4+ GSM258653 CELL  
 66-Thymocyte-DN GSM465595 CELL  
 65-Osteoclasts GSM258652 CELL  
 64-Osteoclasts GSM258651 CELL  
 63-Microglia GSM258650 CELL  
 62-Microglia GSM258649 CELL  
 61-MM-LPS-7h GSM258648 CELL  
 60-MM-LPS-7h GSM258647 CELL  
 59-MM-LPS-6h GSM258646 CELL  
 58-MM-LPS-6h GSM258645 CELL  
 57-MM-LPS-6h GSM258644 CELL  
 56-MM-LPS-6h GSM258643 CELL  
 55-MM-LPS-6h GSM258642 CELL  
 54-MM-LPS-6h GSM258641 CELL  
 53-MM-LPS-6h GSM258640 CELL  
 52-MM-LPS-6h GSM258639 CELL  
 51-Plasmacytoid-DC GSM258638 CELL  
 50-CD8a-DC GSM258637 CELL  
 49-CD8a-DC GSM258636 CELL  
 48-CD8a+DC GSM258635 CELL  
 47-NK-cells GSM258634 CELL  
 46-NK-cells GSM258633 CELL  
 45-Mast-cells-IgE+Ad GSM258632 CELL  
 44-Mast-cells-IgE+Ad GSM258631 CELL  
 43-Mast-cells-IgE GSM258630 CELL  
 42-Mast-cells-IgE GSM258629 CELL  
 41-Mast-cells-IgE GSM258628 CELL  
 40-Granulocytes GSM258627 CELL  
 39-Granulocytes GSM258626 CELL  
 38-MP GSM258625 CELL  
 37-MP GSM258624 CELL  
 36-MP GSM258623 CELL  
 35-MP GSM258622 CELL  
 34-MEP GSM258621 CELL  
 33-MEP GSM258620 CELL  
 32-HESC GSM258619 CELL  
 31-HESC GSM258618 CELL  
 29-Bone marrow GSM258617 CELL  
 28-Bone marrow GSM258616 CELL  
 27-paneth-cells-GF-1 GSM116357 CELL  
 26-paneth-cells-GF-1 GSM116356 CELL  
 25-paneth-cells-GF-1 GSM116355 CELL  
 24-paneth-cells-GF-1 GSM116354 CELL  
 23-paneth-cells-GF-1 GSM116353 CELL  
 22-paneth-cells-GF-1 GSM116352 CELL  
 21-paneth-cells-GF-1 GSM116351 CELL  
 20-Colon-Crypt GSM480374 CELL  
 19-Colon-Vill GSM480373 CELL  
 18-Colon-Vill GSM480372 CELL  
 17-Colon-IEC-GF GSM349880 CELL  
 16-Colon-IEC-GF GSM350375 CELL  
 15-Ileum-IEC-GF GSM350376 CELL  
 14-Ileum-IEC GSM350377 CELL  
 13-Small-intestine-epithelium RMINEP002901 CELL  
 12-Small-intestine-epithelium RMINEP001001 CELL  
 11-FAE-RMPYEP001001 CELL  
 10-FAE-RMPYEP001001 CELL  
 9-Ileum-IEC GSM190797 CELL  
 8-Ileum-IEC GSM190796 CELL  
 7-Ileum-IEC GSM190795 CELL  
 6-CT-w-M-cells GSM190794 CELL  
 5-CT-w-M-cells GSM190793 CELL  
 4-CT-y-M-cells GSM190792 CELL  
 03-PP-M-cells GSM190791 CELL  
 02-PP-M-cells GSM190790 CELL  
 01-PP-M-cells GSM190789 CELL



Cluster0030\_Uncertain (81 nodes)

696.8  
660.1  
623.4  
586.8  
550.1  
513.4  
478.7  
440.1  
403.4  
366.7  
330.1  
293.4  
256.7  
220  
183.4  
146.7  
110  
73.3  
36.7  
0

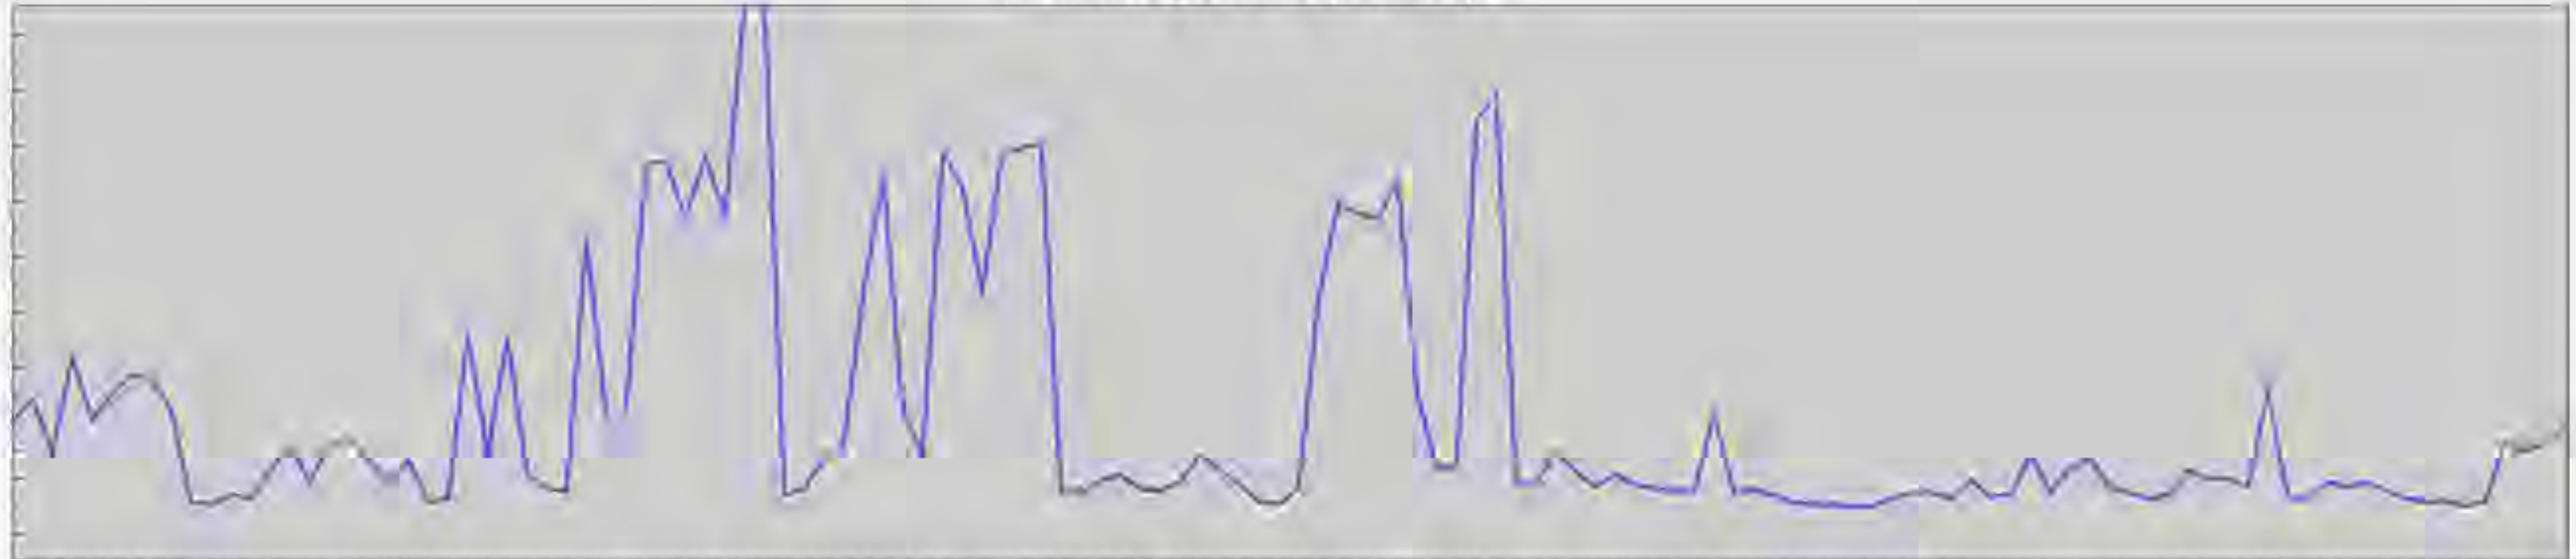

130- NALT GSM289411.CEL  
129- NALT GSM289410.CEL  
128- NALT GSM289409.CEL  
127- NALT GSM289408.CEL  
126- Colon-d9 GSM1988105.CEL  
125- Colon-d9 GSM1988104.CEL  
124- Colon-d9 GSM1988103.CEL  
123- Colon-d4 GSM1988102.CEL  
122- Colon-d4 GSM1988101.CEL  
121- Intestine-large GSM258676.CEL  
120- Intestine-large GSM258675.CEL  
119- Intestine-small GSM258678.CEL  
118- Intestine-small GSM258692.CEL  
117- Lymph-nodes GSM258691.CEL  
116- Lymph-nodes GSM258726.CEL  
115- Spleen GSM258768.CEL  
114- Spleen GSM258767.CEL  
113- Neuro2a GSM258728.CEL  
112- Neuro2a GSM258727.CEL  
111- Astrocytes GSM241898.CEL  
110- mimg GSM258726.CEL  
109- mimg GSM258725.CEL  
108- MIMCD3 GSM258724.CEL  
107- MIMCD3 GSM258723.CEL  
106- Bruce4 GSM258656.CEL  
105- Bruce4 GSM258655.CEL  
104- C2C12 GSM258690.CEL  
103- C2C12 GSM258689.CEL  
102- NIH3T3 GSM258739.CEL  
101- NIH3T3 GSM258739.CEL  
100- 3T3-L1 GSM258610.CEL  
99- 3T3-L1 GSM258609.CEL  
98- 10T1/2 GSM258631.CEL  
97- 10T1/2 GSM258631.CEL  
96- Osteoblast-d21 GSM258740.CEL  
95- Osteoblast-d21 GSM258739.CEL  
94- Osteoblast-d14 GSM258738.CEL  
93- Osteoblast-d14 GSM258737.CEL  
92- Osteoblast-d5 GSM258742.CEL  
91- Osteoblast-d5 GSM258741.CEL  
90- Chondrocytes GSM266741.CEL  
89- Chondrocytes GSM266740.CEL  
88- Nat Helper cell GSM465594.CEL  
87- Nat Helper cell GSM465593.CEL  
86- T cell GSM465596.CEL  
85- MS-1 GSM234692.CEL  
84- Lymph-endc-cells GSM143704.CEL  
83- PP-FDC GSM481977.CEL  
82- PP-FDC GSM481978.CEL  
81- PP-FDC GSM481976.CEL  
80- FLY RMLNDCC003001.CEL  
79- FLY RMLNDCC003001.CEL  
78- Follicular-Bcells GSM258664.CEL  
77- Follicular-Bcells GSM258663.CEL  
76- MZ-Bcell GSM258621.CEL  
75- MZ-Bcell GSM258621.CEL  
74- BAF3 GSM258620.CEL  
73- BAF3 GSM258619.CEL  
72- Tregs GSM258778.CEL  
71- Tregs GSM258777.CEL  
70- T-cells-CD8+ GSM258776.CEL  
69- T-cells-CD8+ GSM258774.CEL  
68- T-cells-CD4+ GSM258773.CEL  
67- T-cells-CD4+ GSM258744.CEL  
66- Thymocyte-DN GSM465595.CEL  
65- Osteoclasts GSM258743.CEL  
64- Microglia GSM258721.CEL  
63- Microglia GSM258721.CEL  
62- MM-PS-7h GSM258706.CEL  
61- MM-PS-7h GSM258706.CEL  
60- MM-PS-6h GSM258702.CEL  
59- MM-PS-6h GSM258702.CEL  
58- BMM-LPS-6h GSM258699.CEL  
57- BMM-LPS-6h GSM258699.CEL  
56- BMM-LPS-6h GSM258694.CEL  
55- BMM-LPS-6h GSM258694.CEL  
54- BMM-LPS-6h GSM258694.CEL  
53- BMM-LPS-6h GSM258694.CEL  
52- BMM-LPS-6h GSM258694.CEL  
51- BMM-LPS-6h GSM258694.CEL  
50- CD8a-DC GSM258647.CEL  
49- CD8a-DC GSM258647.CEL  
48- CD8a+DC GSM258646.CEL  
47- NK-cells GSM258732.CEL  
46- NK-cells GSM258731.CEL  
45- Mast-cells-IgE+Ad GSM258718.CEL  
44- Mast-cells-IgE+Ad GSM258717.CEL  
43- Mast-cells-IgE GSM258714.CEL  
42- Mast-cells-IgE GSM258713.CEL  
41- Mast-cells GSM258712.CEL  
40- Mast-cells GSM258711.CEL  
39- Granulocytes GSM258667.CEL  
38- Granulocytes GSM258667.CEL  
37- GMP GSM258666.CEL  
36- GMP GSM258666.CEL  
35- GMP GSM258664.CEL  
34- GMP GSM258664.CEL  
33- MIEP GSM258720.CEL  
32- MIEP GSM258719.CEL  
31- HSC GSM258770.CEL  
30- HSC GSM258769.CEL  
29- Bone marrow GSM258628.CEL  
28- Bone marrow GSM258627.CEL  
27- paneth-cells-GE GSM116358.CEL  
26- paneth-cells-GE GSM116357.CEL  
25- paneth-cells GSM116350.CEL  
24- paneth-cells GSM116359.CEL  
23- paneth-cells GSM318589.CEL  
22- paneth-cells GSM318590.CEL  
21- Colon-Crypt GSM480375.CEL  
20- Colon-Crypt GSM480374.CEL  
19- Colon-Vill GSM480363.CEL  
18- Colon-Vill GSM480362.CEL  
17- Colon-IEC-GE GSM349880.CEL  
16- Colon-IEC-GE GSM350375.CEL  
15- Ileum-IEC GSM350376.CEL  
14- Ileum-IEC GSM350371.CEL  
13- Small-intestine-epithelium RMINEP002901.CEL  
12- Small-intestine-epithelium RMINEP001001.CEL  
11- FAE RMPYEP002001.CEL  
10- FAE RMPYEP001001.CEL  
09- Ileum-IEC GSM190797.CEL  
08- Ileum-IEC GSM190796.CEL  
07- Ileum-IEC GSM190795.CEL  
06- CT-v-M-cells GSM190794.CEL  
05- CT-v-M-cells GSM190793.CEL  
04- CT-v-M-cells GSM190792.CEL  
03- PP-M-cells GSM190791.CEL  
02- PP-M-cells GSM190790.CEL  
01- PP-M-cells GSM190789.CEL



Cluster0031\_T cell-related (79 nodes)

966.7  
915.8  
864.9  
814  
763.2  
712.9  
661.4  
610.5  
559.6  
508.8  
457.9  
407  
356.1  
305.3  
254.4  
203.5  
152.6  
101.8  
50.9  
0

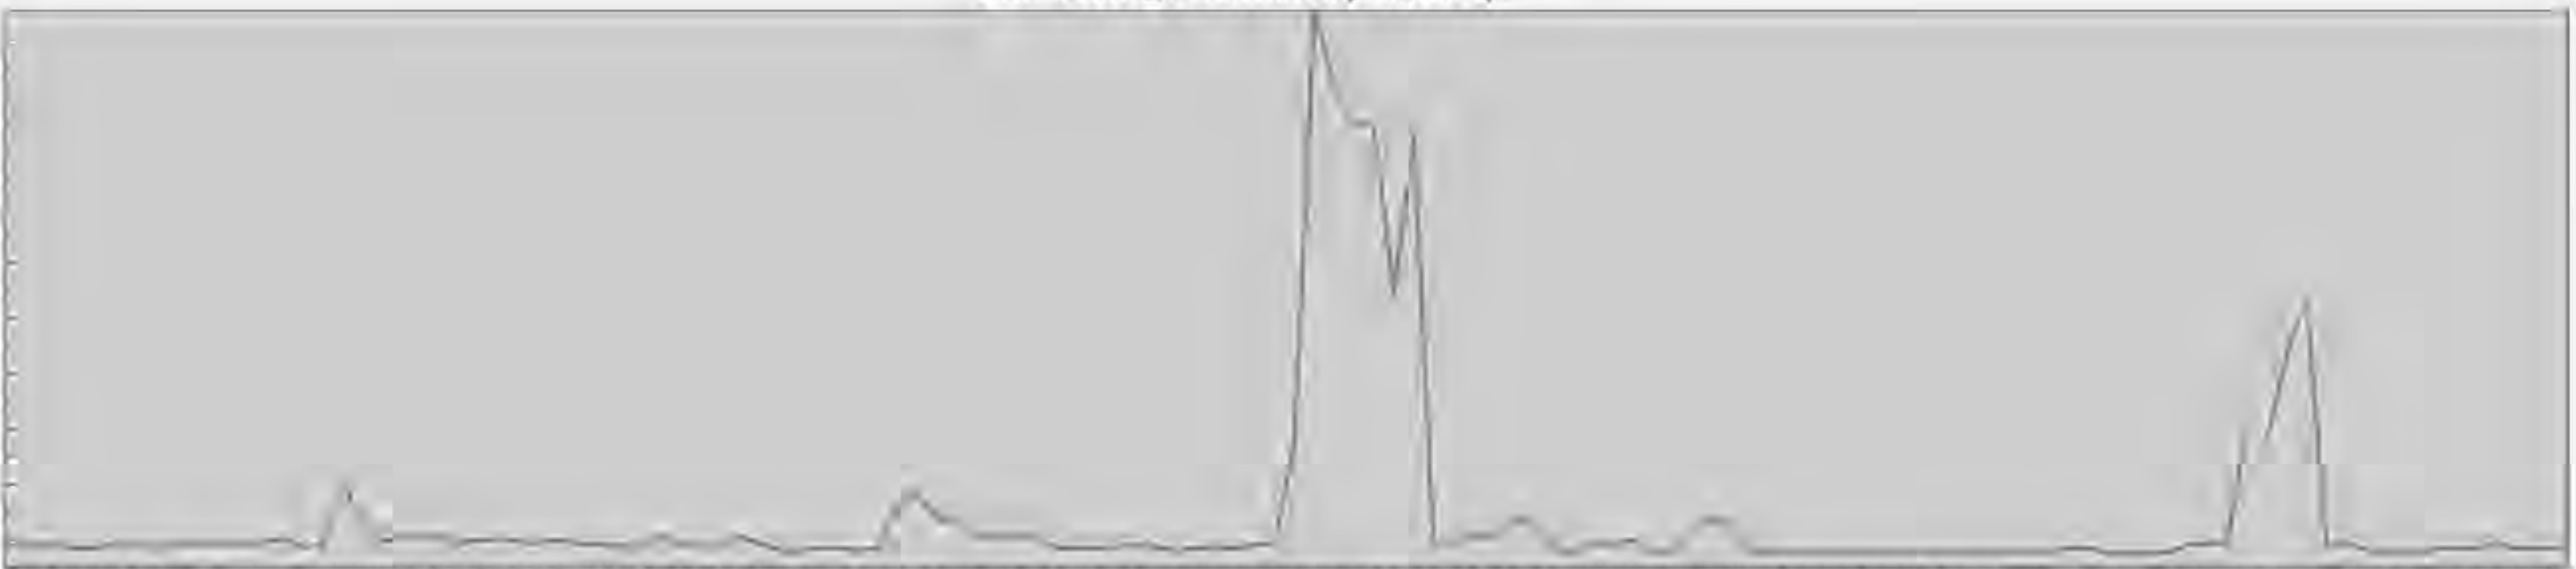

130-NALT GSM289411 CELL  
 129-NALT GSM289410 CELL  
 128-NALT GSM289409 CELL  
 127-NALT GSM289408 CELL  
 126-Color-d9 GSM1988105 CELL  
 125-Color-d9 GSM1988104 CELL  
 124-Color-d9 GSM1988103 CELL  
 123-Color-d4 GSM1988102 CELL  
 122-Color-d4 GSM1988101 CELL  
 121-Intestine-large GSM258676 CELL  
 120-Intestine-large GSM258675 CELL  
 119-Intestine-small GSM258674 CELL  
 118-Intestine-small GSM258673 CELL  
 117-Lymph-nodes GSM258672 CELL  
 116-Spleen GSM258671 CELL  
 115-Spleen GSM258670 CELL  
 114-Neuro2a GSM258669 CELL  
 113-Neuro2a GSM258668 CELL  
 112-Astrocytes GSM241898 CELL  
 111-mimb GSM2586725 CELL  
 110-mimb GSM2586724 CELL  
 109-mimb GSM2586723 CELL  
 108-MIMCD3 GSM2586722 CELL  
 107-MIMCD3 GSM2586721 CELL  
 106-Bruce4 GSM2586720 CELL  
 105-Bruce4 GSM2586719 CELL  
 104-C2C12 GSM2586718 CELL  
 103-C2C12 GSM2586717 CELL  
 102-NH3T3 GSM2586716 CELL  
 101-NH3T3 GSM2586715 CELL  
 100-3T3-L1 GSM2586714 CELL  
 99-3T3-L1 GSM2586713 CELL  
 98-10T12 GSM2586712 CELL  
 97-10T12 GSM2586711 CELL  
 96-Osteoblast-d21 GSM2586710 CELL  
 95-Osteoblast-d14 GSM2586709 CELL  
 94-Osteoblast-d14 GSM2586708 CELL  
 93-Osteoblast-d14 GSM2586707 CELL  
 92-Osteoblast-d5 GSM2586706 CELL  
 91-Osteoblast-d5 GSM2586705 CELL  
 90-Chondrocytes GSM2586704 CELL  
 89-Chondrocytes GSM2586703 CELL  
 88-Nat Helper cell GSM465594 CELL  
 87-Nat Helper cell GSM465593 CELL  
 86-T cell GSM465592 CELL  
 85-MS-1 GSM234692 CELL  
 84-Lymph-endc-cells GSM143704 CELL  
 83-P-FDC GSM481977 CELL  
 82-P-FDC GSM481976 CELL  
 81-P-FDC GSM481975 CELL  
 80-L-Y RMLNDCC003001 CELL  
 79-L-Y RMLNDCC003001 CELL  
 78-Follicular-Bcells GSM258664 CELL  
 77-Follicular-Bcells GSM258663 CELL  
 76-MZ-Bcell GSM258662 CELL  
 75-MZ-Bcell GSM258661 CELL  
 74-BAF3 GSM258660 CELL  
 73-BAF3 GSM258659 CELL  
 72-Tregs GSM258658 CELL  
 71-Tregs GSM258657 CELL  
 70-T-cells-CD8+ GSM258656 CELL  
 69-T-cells-CD8+ GSM258655 CELL  
 68-T-cells-CD4+ GSM258654 CELL  
 67-T-cells-CD4+ GSM258653 CELL  
 66-Thymocyte-DN GSM465595 CELL  
 65-Osteoclasts GSM258652 CELL  
 64-Osteoclasts GSM258651 CELL  
 63-Microglia GSM258650 CELL  
 62-Microglia GSM258649 CELL  
 61-MM-LPS-7h GSM258648 CELL  
 60-MM-LPS-7h GSM258647 CELL  
 59-MM-LPS-6h GSM258646 CELL  
 58-MM-LPS-6h GSM258645 CELL  
 57-MM-LPS-6h GSM258644 CELL  
 56-MM-LPS-6h GSM258643 CELL  
 55-MM-LPS-6h GSM258642 CELL  
 54-MM-LPS-6h GSM258641 CELL  
 53-MM-LPS-6h GSM258640 CELL  
 52-Plasmacytoid-DC GSM258639 CELL  
 51-Plasmacytoid-DC GSM258638 CELL  
 50-CD8a-DC GSM258637 CELL  
 49-CD8a-DC GSM258636 CELL  
 48-CD8a+DC GSM258635 CELL  
 47-NK-cells GSM258634 CELL  
 46-NK-cells GSM258633 CELL  
 45-Mast-cells-IgE+Ad GSM258632 CELL  
 44-Mast-cells-IgE+Ad GSM258631 CELL  
 43-Mast-cells-IgE GSM258630 CELL  
 42-Mast-cells-IgE GSM258629 CELL  
 41-Mast-cells-IgE GSM258628 CELL  
 40-Granulocytes GSM258627 CELL  
 39-Granulocytes GSM258626 CELL  
 38-GMP GSM258625 CELL  
 37-GMP GSM258624 CELL  
 36-GMP GSM258623 CELL  
 35-GMP GSM258622 CELL  
 34-MIEP GSM258621 CELL  
 33-MIEP GSM258620 CELL  
 32-MIEP GSM258619 CELL  
 31-HESC GSM258618 CELL  
 30-HESC GSM258617 CELL  
 29-Bone marrow GSM258616 CELL  
 28-Bone marrow GSM258615 CELL  
 27-paneth-cells-GF-1 GSM116357 CELL  
 26-paneth-cells-GF-1 GSM116356 CELL  
 25-paneth-cells-GF-1 GSM116355 CELL  
 24-paneth-cells-GF-1 GSM116354 CELL  
 23-paneth-cells-GF-1 GSM116353 CELL  
 22-paneth-cells-GF-1 GSM116352 CELL  
 21-paneth-cells-GF-1 GSM116351 CELL  
 20-Colon-Crypt GSM480374 CELL  
 19-Colon-Vill GSM480373 CELL  
 18-Colon-Vill GSM480372 CELL  
 17-Colon-IEC-Gf GSM349880 CELL  
 16-Colon-IEC-Gf GSM350375 CELL  
 15-Ileum-IEC-Gf GSM350376 CELL  
 14-Ileum-IEC GSM350377 CELL  
 13-Small-intestine-epithelium RMINEP002001 CELL  
 12-Small-intestine-epithelium RMINEP001001 CELL  
 11-FAE RMPYEP002001 CELL  
 10-FAE RMPYEP001001 CELL  
 09-Ileum-IEC GSM190797 CELL  
 08-Ileum-IEC GSM190796 CELL  
 07-Ileum-IEC GSM190795 CELL  
 06-CT-w-M-cells GSM190794 CELL  
 05-CT-y-M-cells GSM190793 CELL  
 04-PP-M-cells GSM190792 CELL  
 03-PP-M-cells GSM190791 CELL  
 02-PP-M-cells GSM190790 CELL  
 01-PP-M-cells GSM190789 CELL



Cluster0032\_Phagocyte-related (75 nodes)

4,588.6  
4,347.1  
4,105.6  
3,864.1  
3,622.6  
3,381.1  
3,139.6  
2,898.1  
2,656.5  
2,415  
2,173.6  
1,932  
1,690.5  
1,449  
1,207.5  
966  
724.5  
483  
241.5  
0

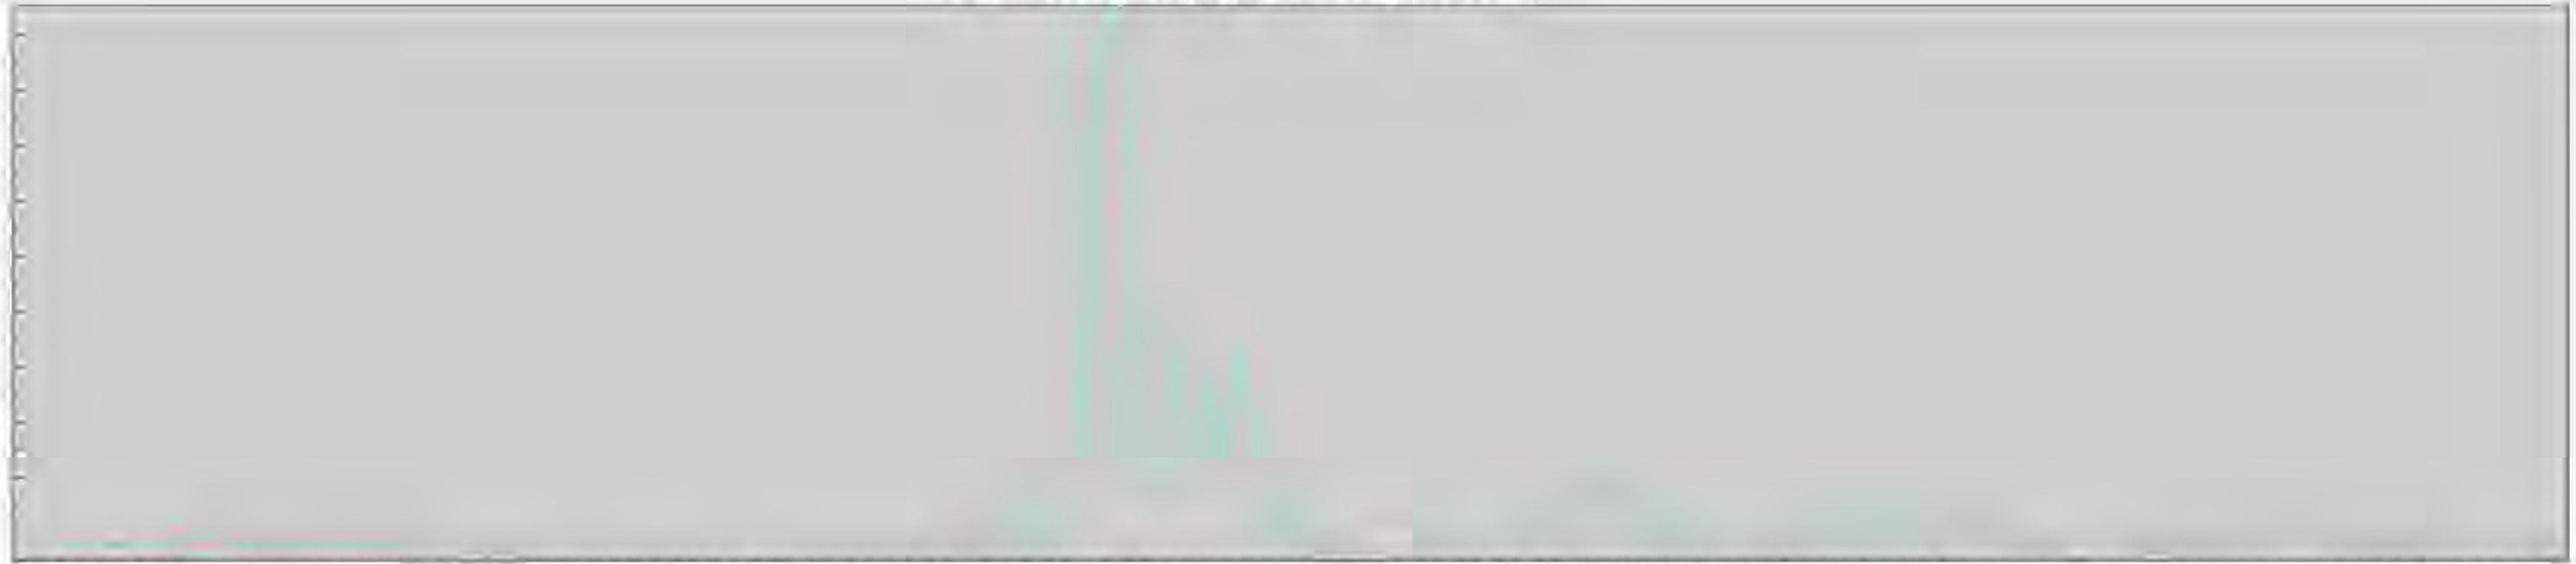

|     |                            |              |     |
|-----|----------------------------|--------------|-----|
| 01  | PP-M-cells                 | GSM190789    | CEL |
| 02  | PP-M-cells                 | GSM190790    | CEL |
| 03  | PP-M-cells                 | GSM190791    | CEL |
| 04  | CT-y-M-cells               | GSM190792    | CEL |
| 05  | CT-y-M-cells               | GSM190793    | CEL |
| 06  | CT-w-M-cells               | GSM190794    | CEL |
| 07  | Ileum-EC                   | GSM190795    | CEL |
| 08  | Ileum-EC                   | GSM190796    | CEL |
| 09  | Ileum-EC                   | GSM190797    | CEL |
| 10  | FAE-RMP                    | GSM190798    | CEL |
| 11  | FAE-RMP                    | GSM190799    | CEL |
| 12  | Small intestine-epithelium | RMINEP001001 | CEL |
| 13  | Small intestine-epithelium | RMINEP002001 | CEL |
| 14  | Ileum-EC                   | GSM350371    | CEL |
| 15  | Ileum-EC                   | GSM350375    | CEL |
| 16  | Colon-EC                   | GSM349880    | CEL |
| 17  | Colon-EC                   | GSM350375    | CEL |
| 18  | Colon-Vill                 | GSM480362    | cel |
| 19  | Colon-Vill                 | GSM480363    | cel |
| 20  | Colon-Crypt                | GSM480374    | cel |
| 21  | Colon-Crypt                | GSM480375    | cel |
| 22  | Paneth-cells               | GSM318589    | CEL |
| 23  | Paneth-cells               | GSM318590    | CEL |
| 24  | Paneth-cells               | GSM116359    | CEL |
| 25  | Paneth-cells               | GSM116359    | CEL |
| 26  | Paneth-cells               | GSM116359    | CEL |
| 27  | Paneth-cells               | GSM116357    | CEL |
| 28  | Paneth-cells               | GSM116357    | CEL |
| 29  | Bone marrow                | GSM258627    | CEL |
| 30  | HS                         | GSM258770    | CEL |
| 31  | HS                         | GSM258770    | CEL |
| 32  | MIEP                       | GSM258770    | CEL |
| 33  | MIEP                       | GSM258770    | CEL |
| 34  | MIEP                       | GSM258770    | CEL |
| 35  | CMP                        | GSM258642    | CEL |
| 36  | CMP                        | GSM258642    | CEL |
| 37  | CMP                        | GSM258665    | CEL |
| 38  | CMP                        | GSM258665    | CEL |
| 39  | Granulocytes               | GSM258667    | CEL |
| 40  | Mast-cells                 | GSM258712    | CEL |
| 41  | Mast-cells                 | GSM258712    | CEL |
| 42  | Mast-cells                 | GSM258712    | CEL |
| 43  | Mast-cells                 | GSM258712    | CEL |
| 44  | Mast-cells                 | GSM258712    | CEL |
| 45  | Mast-cells                 | GSM258712    | CEL |
| 46  | NK-cells                   | GSM258732    | CEL |
| 47  | NK-cells                   | GSM258732    | CEL |
| 48  | CD8a+DC                    | GSM258646    | CEL |
| 49  | CD8a+DC                    | GSM258646    | CEL |
| 50  | CD8a-DC                    | GSM258647    | CEL |
| 51  | CD8a-DC                    | GSM258647    | CEL |
| 52  | CD8a-DC                    | GSM258647    | CEL |
| 53  | Plasmacytoid-DC            | GSM258650    | CEL |
| 54  | Plasmacytoid-DC            | GSM258650    | CEL |
| 55  | BM-M-PS-6h                 | GSM258694    | CEL |
| 56  | BM-M-PS-6h                 | GSM258694    | CEL |
| 57  | BM-M-PS-6h                 | GSM258700    | CEL |
| 58  | BM-M-PS-7h                 | GSM258702    | CEL |
| 59  | BM-M-PS-7h                 | GSM258702    | CEL |
| 60  | BM-M-PS-7h                 | GSM258706    | CEL |
| 61  | BM-M-PS-7h                 | GSM258706    | CEL |
| 62  | Microglia                  | GSM258721    | CEL |
| 63  | Microglia                  | GSM258721    | CEL |
| 64  | Osteoclasts                | GSM258743    | CEL |
| 65  | Osteoclasts                | GSM258743    | CEL |
| 66  | Thymocyte-DN               | GSM465595    | CEL |
| 67  | T-cells-CD4+               | GSM258773    | CEL |
| 68  | T-cells-CD4+               | GSM258773    | CEL |
| 69  | T-cells-CD8+               | GSM258774    | CEL |
| 70  | T-cells-CD8+               | GSM258774    | CEL |
| 71  | Tregs                      | GSM258778    | CEL |
| 72  | Tregs                      | GSM258778    | CEL |
| 73  | BAF3                       | GSM258620    | CEL |
| 74  | BAF3                       | GSM258620    | CEL |
| 75  | MZ-Bcell                   | GSM258622    | CEL |
| 76  | MZ-Bcell                   | GSM258622    | CEL |
| 77  | Follicular-Bcells          | GSM258664    | CEL |
| 78  | Follicular-Bcells          | GSM258664    | CEL |
| 79  | F-LY-RMLND                 | GSM258664    | CEL |
| 80  | F-LY-RMLND                 | GSM258664    | CEL |
| 81  | PP-FDC                     | GSM481976    | CEL |
| 82  | PP-FDC                     | GSM481976    | CEL |
| 83  | PP-FDC                     | GSM481977    | CEL |
| 84  | Lymph-endo-cells           | GSM143704    | CEL |
| 85  | MS-1                       | GSM234692    | CEL |
| 86  | NaT-Helper cell            | GSM465593    | CEL |
| 87  | NaT-Helper cell            | GSM465593    | CEL |
| 88  | Chondrocytes               | GSM258741    | CEL |
| 89  | Chondrocytes               | GSM258741    | CEL |
| 90  | Osteoblast-d5              | GSM258742    | CEL |
| 91  | Osteoblast-d5              | GSM258742    | CEL |
| 92  | Osteoblast-d14             | GSM258737    | CEL |
| 93  | Osteoblast-d14             | GSM258737    | CEL |
| 94  | Osteoblast-d21             | GSM258738    | CEL |
| 95  | Osteoblast-d21             | GSM258738    | CEL |
| 96  | Osteoblast-d21             | GSM258631    | CEL |
| 97  | OT12                       | GSM258632    | CEL |
| 98  | OT12                       | GSM258632    | CEL |
| 99  | 3T3-L1                     | GSM258610    | CEL |
| 100 | 3T3-L1                     | GSM258610    | CEL |
| 101 | NH3T3                      | GSM258739    | CEL |
| 102 | NH3T3                      | GSM258739    | CEL |
| 103 | C2C12                      | GSM258629    | CEL |
| 104 | C2C12                      | GSM258629    | CEL |
| 105 | Bruce4                     | GSM258656    | CEL |
| 106 | Bruce4                     | GSM258656    | CEL |
| 107 | MIMCD3                     | GSM258723    | CEL |
| 108 | MIMCD3                     | GSM258723    | CEL |
| 109 | mim6                       | GSM258725    | CEL |
| 110 | mim6                       | GSM258725    | CEL |
| 111 | Astrocytes                 | GSM241898    | CEL |
| 112 | Neuro2a                    | GSM258728    | CEL |
| 113 | Spleen                     | GSM258767    | CEL |
| 114 | Spleen                     | GSM258767    | CEL |
| 115 | Lymph-nodes                | GSM258691    | CEL |
| 116 | Lymph-nodes                | GSM258691    | CEL |
| 117 | Lymph-nodes                | GSM258691    | CEL |
| 118 | Intestine-small            | GSM258678    | CEL |
| 119 | Intestine-small            | GSM258678    | CEL |
| 120 | Intestine-large            | GSM258675    | CEL |
| 121 | Intestine-large            | GSM258675    | CEL |
| 122 | Intestine-large            | GSM258677    | CEL |
| 123 | Colon-d4                   | GSM198810    | CEL |
| 124 | Colon-d4                   | GSM198810    | CEL |
| 125 | Colon-d9                   | GSM198810    | CEL |
| 126 | Colon-d9                   | GSM198810    | CEL |
| 127 | NALT                       | GSM289408    | CEL |
| 128 | NALT                       | GSM289409    | CEL |
| 129 | NALT                       | GSM289410    | CEL |
| 130 | NALT                       | GSM289411    | CEL |



Cluster0033\_High in Min6, astrocytes & Neuro2A cells (74 nodes)

707.9  
670.7  
633.4  
596.1  
558.9  
521.8  
484.4  
447.1  
409.8  
372.6  
335.3  
298.1  
260.8  
223.6  
186.3  
149  
111.8  
74.5  
37.3  
0

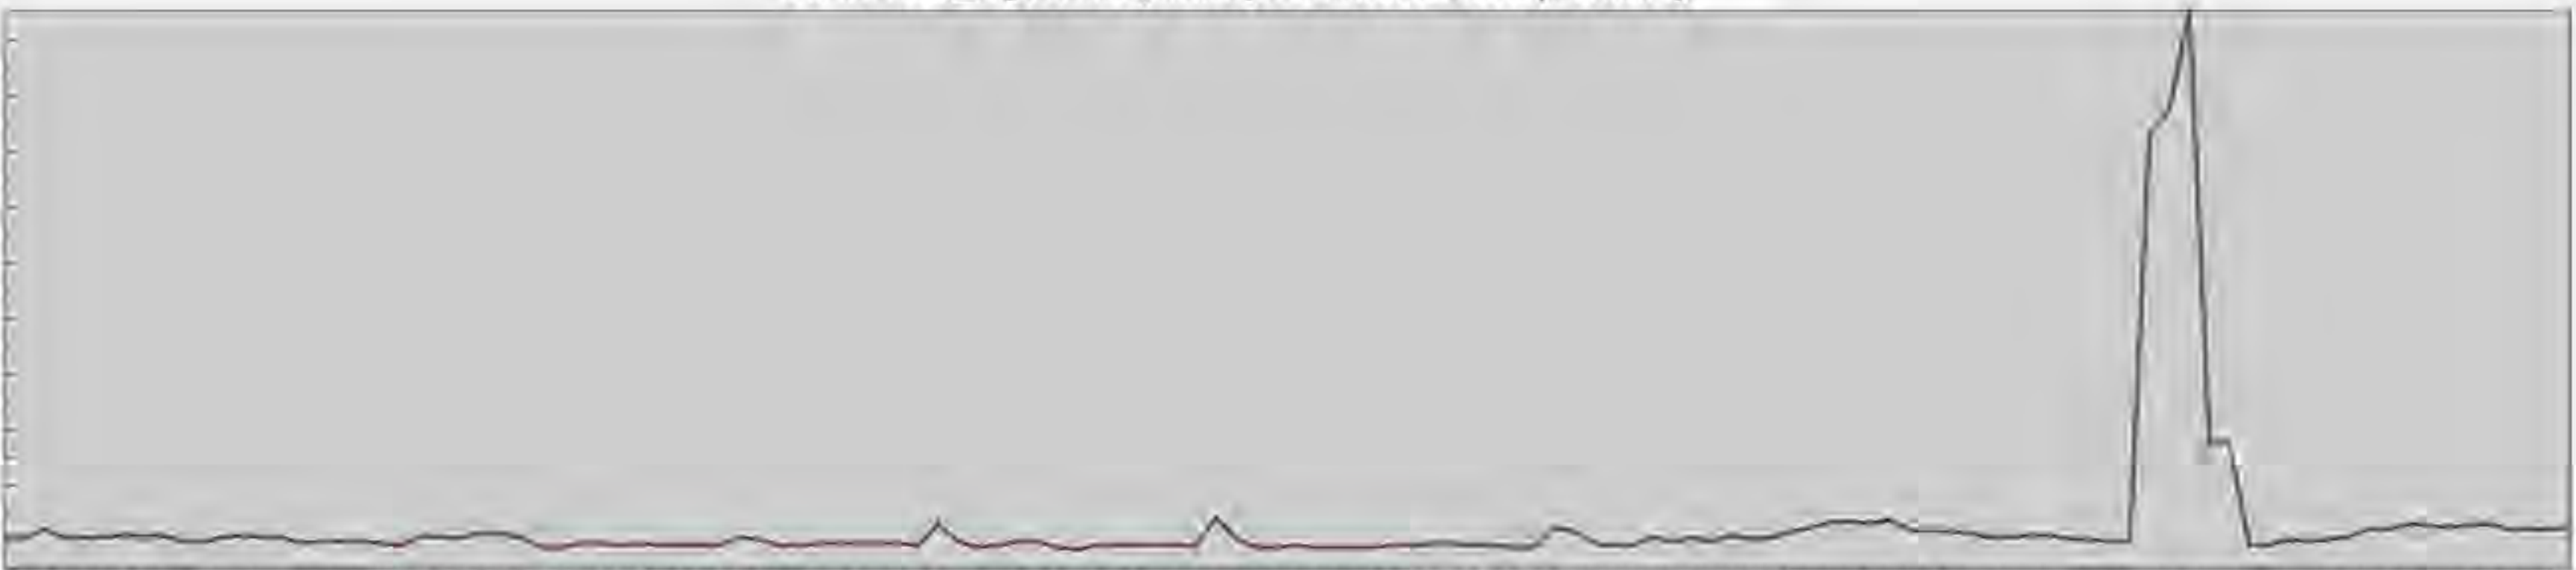

|     |                            |              |     |
|-----|----------------------------|--------------|-----|
| 01  | PP-M-cells                 | GSM190789    | CEL |
| 02  | PP-M-cells                 | GSM190790    | CEL |
| 03  | PP-M-cells                 | GSM190791    | CEL |
| 04  | CT-y-M-cells               | GSM190792    | CEL |
| 05  | CT-y-M-cells               | GSM190793    | CEL |
| 06  | CT-w-M-cells               | GSM190794    | CEL |
| 07  | Ileum-IEC                  | GSM190795    | CEL |
| 08  | Ileum-IEC                  | GSM190796    | CEL |
| 09  | Ileum-IEC                  | GSM190797    | CEL |
| 10  | FAE-RMP                    | GSM190798    | CEL |
| 11  | FAE-RMP                    | GSM190799    | CEL |
| 12  | Small intestine-epithelium | RMINEP001001 | CEL |
| 13  | Small intestine-epithelium | RMINEP002001 | CEL |
| 14  | Ileum-IEC                  | GSM350371    | CEL |
| 15  | Ileum-IEC                  | GSM350375    | CEL |
| 16  | Colon-VIII                 | GSM480362    | cel |
| 17  | Colon-VIII                 | GSM480363    | cel |
| 18  | Colon-VIII                 | GSM480364    | cel |
| 19  | Colon-VIII                 | GSM480365    | cel |
| 20  | Colon-Crypt                | GSM480374    | cel |
| 21  | Colon-Crypt                | GSM480375    | cel |
| 22  | Paneth-cells               | GSM318589    | CEL |
| 23  | Paneth-cells               | GSM318590    | CEL |
| 24  | Paneth-cells               | GSM116359    | CEL |
| 25  | Paneth-cells               | GSM116360    | CEL |
| 26  | Paneth-cells               | GSM116361    | CEL |
| 27  | Paneth-cells               | GSM116362    | CEL |
| 28  | Paneth-cells               | GSM116363    | CEL |
| 29  | Bone marrow                | GSM258627    | CEL |
| 30  | HSC                        | GSM258628    | CEL |
| 31  | HSC                        | GSM258629    | CEL |
| 32  | MEP                        | GSM258630    | CEL |
| 33  | MEP                        | GSM258631    | CEL |
| 34  | MEP                        | GSM258632    | CEL |
| 35  | MEP                        | GSM258633    | CEL |
| 36  | MEP                        | GSM258634    | CEL |
| 37  | MEP                        | GSM258635    | CEL |
| 38  | MEP                        | GSM258636    | CEL |
| 39  | Granulocytes               | GSM258637    | CEL |
| 40  | Granulocytes               | GSM258638    | CEL |
| 41  | Mast-cells                 | GSM258639    | CEL |
| 42  | Mast-cells                 | GSM258640    | CEL |
| 43  | Mast-cells                 | GSM258641    | CEL |
| 44  | Mast-cells                 | GSM258642    | CEL |
| 45  | Mast-cells                 | GSM258643    | CEL |
| 46  | NK-cells                   | GSM258644    | CEL |
| 47  | NK-cells                   | GSM258645    | CEL |
| 48  | CD8a+DC                    | GSM258646    | CEL |
| 49  | CD8a+DC                    | GSM258647    | CEL |
| 50  | CD8a+DC                    | GSM258648    | CEL |
| 51  | CD8a+DC                    | GSM258649    | CEL |
| 52  | CD8a+DC                    | GSM258650    | CEL |
| 53  | CD8a+DC                    | GSM258651    | CEL |
| 54  | CD8a+DC                    | GSM258652    | CEL |
| 55  | CD8a+DC                    | GSM258653    | CEL |
| 56  | CD8a+DC                    | GSM258654    | CEL |
| 57  | CD8a+DC                    | GSM258655    | CEL |
| 58  | CD8a+DC                    | GSM258656    | CEL |
| 59  | CD8a+DC                    | GSM258657    | CEL |
| 60  | CD8a+DC                    | GSM258658    | CEL |
| 61  | CD8a+DC                    | GSM258659    | CEL |
| 62  | Microglia                  | GSM258660    | CEL |
| 63  | Microglia                  | GSM258661    | CEL |
| 64  | Microglia                  | GSM258662    | CEL |
| 65  | Microglia                  | GSM258663    | CEL |
| 66  | Thymocyte-DN               | GSM465595    | CEL |
| 67  | T-cells-CD4+               | GSM258664    | CEL |
| 68  | T-cells-CD4+               | GSM258665    | CEL |
| 69  | T-cells-CD4+               | GSM258666    | CEL |
| 70  | T-cells-CD4+               | GSM258667    | CEL |
| 71  | T-cells-CD4+               | GSM258668    | CEL |
| 72  | T-cells-CD4+               | GSM258669    | CEL |
| 73  | Tregs                      | GSM258670    | CEL |
| 74  | Tregs                      | GSM258671    | CEL |
| 75  | Tregs                      | GSM258672    | CEL |
| 76  | Tregs                      | GSM258673    | CEL |
| 77  | Tregs                      | GSM258674    | CEL |
| 78  | Tregs                      | GSM258675    | CEL |
| 79  | Tregs                      | GSM258676    | CEL |
| 80  | Tregs                      | GSM258677    | CEL |
| 81  | Tregs                      | GSM258678    | CEL |
| 82  | Tregs                      | GSM258679    | CEL |
| 83  | Tregs                      | GSM258680    | CEL |
| 84  | Tregs                      | GSM258681    | CEL |
| 85  | Tregs                      | GSM258682    | CEL |
| 86  | Tregs                      | GSM258683    | CEL |
| 87  | Tregs                      | GSM258684    | CEL |
| 88  | Tregs                      | GSM258685    | CEL |
| 89  | Tregs                      | GSM258686    | CEL |
| 90  | Tregs                      | GSM258687    | CEL |
| 91  | Tregs                      | GSM258688    | CEL |
| 92  | Tregs                      | GSM258689    | CEL |
| 93  | Tregs                      | GSM258690    | CEL |
| 94  | Tregs                      | GSM258691    | CEL |
| 95  | Tregs                      | GSM258692    | CEL |
| 96  | Tregs                      | GSM258693    | CEL |
| 97  | Tregs                      | GSM258694    | CEL |
| 98  | Tregs                      | GSM258695    | CEL |
| 99  | Tregs                      | GSM258696    | CEL |
| 100 | Tregs                      | GSM258697    | CEL |
| 101 | Tregs                      | GSM258698    | CEL |
| 102 | Tregs                      | GSM258699    | CEL |
| 103 | Tregs                      | GSM258700    | CEL |
| 104 | Tregs                      | GSM258701    | CEL |
| 105 | Tregs                      | GSM258702    | CEL |
| 106 | Tregs                      | GSM258703    | CEL |
| 107 | Tregs                      | GSM258704    | CEL |
| 108 | Tregs                      | GSM258705    | CEL |
| 109 | Tregs                      | GSM258706    | CEL |
| 110 | Tregs                      | GSM258707    | CEL |
| 111 | Tregs                      | GSM258708    | CEL |
| 112 | Tregs                      | GSM258709    | CEL |
| 113 | Tregs                      | GSM258710    | CEL |
| 114 | Tregs                      | GSM258711    | CEL |
| 115 | Tregs                      | GSM258712    | CEL |
| 116 | Tregs                      | GSM258713    | CEL |
| 117 | Tregs                      | GSM258714    | CEL |
| 118 | Tregs                      | GSM258715    | CEL |
| 119 | Tregs                      | GSM258716    | CEL |
| 120 | Tregs                      | GSM258717    | CEL |
| 121 | Tregs                      | GSM258718    | CEL |
| 122 | Tregs                      | GSM258719    | CEL |
| 123 | Tregs                      | GSM258720    | CEL |
| 124 | Tregs                      | GSM258721    | CEL |
| 125 | Tregs                      | GSM258722    | CEL |
| 126 | Tregs                      | GSM258723    | CEL |
| 127 | Tregs                      | GSM258724    | CEL |
| 128 | Tregs                      | GSM258725    | CEL |
| 129 | Tregs                      | GSM258726    | CEL |
| 130 | Tregs                      | GSM258727    | CEL |



Cluster0034\_Low in some Paneth cells (67 nodes)

489.6  
463.8  
438.1  
412.3  
386.5  
360.8  
335  
309.2  
283.5  
257.7  
231.9  
206.1  
180.4  
154.6  
128.8  
103.1  
77.3  
51.5  
25.8  
0

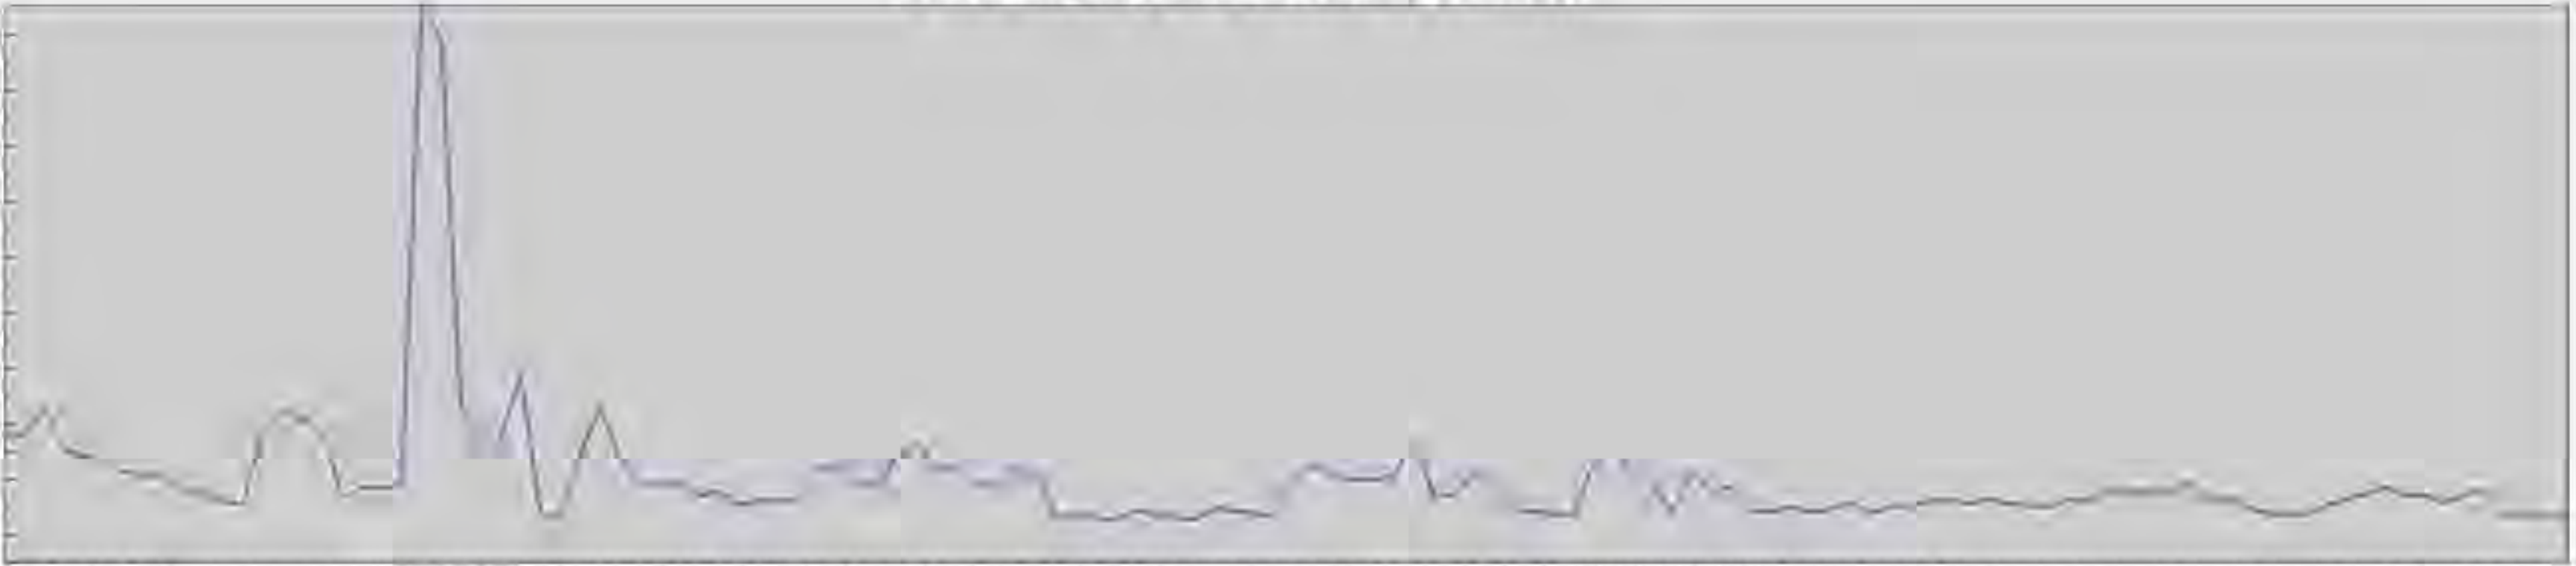

01-PP-M-cells\_GSM190789.CEL  
 02-PP-M-cells\_GSM190790.CEL  
 03-PP-M-cells\_GSM190791.CEL  
 04-CT-Y-M-cells\_GSM190792.CEL  
 05-CT-Y-M-cells\_GSM190793.CEL  
 06-CT-W-M-cells\_GSM190794.CEL  
 07-Ileum-IEC\_GSM190795.CEL  
 08-Ileum-IEC\_GSM190796.CEL  
 09-Ileum-IEC\_GSM190797.CEL  
 10-FAE-RMPYEP001001.CEL  
 11-FAE-RMPYEP002001.CEL  
 12-Small-intestine-epithelium\_RMINEP001001.CEL  
 13-Small-intestine-epithelium\_RMINEP002001.CEL  
 14-Ileum-IEC\_GSM350371.CEL  
 15-Ileum-IEC\_GSM350375.CEL  
 16-Colon-IEC-Gf\_GSM350375.CEL  
 17-Colon-IEC-Gf\_GSM349880.CEL  
 18-Colon-Vill\_GSM480362.CEL  
 19-Colon-Vill\_GSM480363.CEL  
 20-Colon-Crypt\_GSM480374.CEL  
 21-Colon-Crypt\_GSM480375.CEL  
 22-Paneth-cells\_GSM318589.CEL  
 23-Paneth-cells\_GSM318590.CEL  
 24-Paneth-cells\_GSM116350.CEL  
 25-Paneth-cells\_GSM116359.CEL  
 26-Paneth-cells-Gf-1-GSM116357.CEL  
 27-Paneth-cells-Gf-1-GSM116357.CEL  
 28-Paneth-cells-Gf-1-GSM116357.CEL  
 29-Bone marrow\_GSM258628.CEL  
 30-HSC\_GSM258770.CEL  
 31-HSC\_GSM258770.CEL  
 32-MEP\_GSM258770.CEL  
 33-MEP\_GSM258770.CEL  
 34-MEP\_GSM258770.CEL  
 35-CMP\_GSM258864.CEL  
 36-CMP\_GSM258864.CEL  
 37-GMP\_GSM258866.CEL  
 38-GMP\_GSM258866.CEL  
 39-Granulocytes\_GSM258866.CEL  
 40-Mast-cells\_GSM258771.CEL  
 41-Mast-cells\_GSM258771.CEL  
 42-Mast-cells-IdU-GSM258771.CEL  
 43-Mast-cells-IdU-GSM258771.CEL  
 44-Mast-cells-IdU+Ad-GSM258771.CEL  
 45-Mast-cells-IdU+Ad-GSM258771.CEL  
 46-NK-cells\_GSM258731.CEL  
 47-NK-cells\_GSM258731.CEL  
 48-CD8a+DC\_GSM258646.CEL  
 49-CD8a+DC\_GSM258646.CEL  
 50-CD8a-DC\_GSM258647.CEL  
 51-CD8a-DC\_GSM258647.CEL  
 52-CD8a-DC\_GSM258647.CEL  
 53-Plasmacytoid-DC\_GSM258650.CEL  
 54-BMM-GSM258694.CEL  
 55-BMM-GSM258694.CEL  
 56-BMM-LPS-6h\_GSM258700.CEL  
 57-BMM-LPS-6h\_GSM258700.CEL  
 58-BMM-LPS-7h\_GSM258702.CEL  
 59-BMM-LPS-7h\_GSM258702.CEL  
 60-PP-7h\_GSM258706.CEL  
 61-PP-7h\_GSM258706.CEL  
 62-Microglia\_GSM258721.CEL  
 63-Microglia\_GSM258721.CEL  
 64-Osteoclasts\_GSM258743.CEL  
 65-Osteoclasts\_GSM258743.CEL  
 66-Thymocyte-DN\_GSM465595.CEL  
 67-T-cells-CD4+GSM258773.CEL  
 68-T-cells-CD4+GSM258773.CEL  
 69-T-cells-CD8+GSM258776.CEL  
 70-T-cells-CD8+GSM258776.CEL  
 71-Tregs\_GSM258778.CEL  
 72-Tregs\_GSM258778.CEL  
 73-BAF3\_GSM258620.CEL  
 74-BAF3\_GSM258620.CEL  
 75-MZ-Bcell\_GSM258621.CEL  
 76-MZ-Bcell\_GSM258621.CEL  
 77-Follicular-Bcells\_GSM258664.CEL  
 78-Follicular-Bcells\_GSM258664.CEL  
 79-E-L-Y-RMLNDC002001.CEL  
 80-E-L-Y-RMLNDC003001.CEL  
 81-PP-FDC\_GSM481976.CEL  
 82-PP-FDC\_GSM481976.CEL  
 83-PP-FDC\_GSM481977.CEL  
 84-Lymph-endo-cells\_GSM143704.CEL  
 85-MS-1\_GSM234692.CEL  
 86-Tt cell\_GSM465596.CEL  
 87-Nat Helper cell\_GSM465593.CEL  
 88-Nat Helper cell\_GSM465594.CEL  
 89-Chondrocytes\_GSM266741.CEL  
 90-Chondrocytes\_GSM266741.CEL  
 91-Osteoblast-d5\_GSM258741.CEL  
 92-Osteoblast-d5\_GSM258741.CEL  
 93-Osteoblast-d14\_GSM258737.CEL  
 94-Osteoblast-d14\_GSM258737.CEL  
 95-Osteoblast-d21\_GSM258739.CEL  
 96-Osteoblast-d21\_GSM258739.CEL  
 97-10T12\_GSM258631.CEL  
 98-10T12\_GSM258631.CEL  
 99-3T3-L1\_GSM258610.CEL  
 100-3T3-L1\_GSM258610.CEL  
 101-NH3T3\_GSM258730.CEL  
 102-NH3T3\_GSM258730.CEL  
 103-C2C12\_GSM258862.CEL  
 104-C2C12\_GSM258862.CEL  
 105-Bruce4\_GSM258866.CEL  
 106-Bruce4\_GSM258866.CEL  
 107-MIMCD3\_GSM258723.CEL  
 108-MIMCD3\_GSM258723.CEL  
 109-mim6\_GSM258725.CEL  
 110-mim6\_GSM258725.CEL  
 111-Astrocytes\_GSM241898.CEL  
 112-Astrocytes\_GSM241898.CEL  
 113-Spleen\_GSM258767.CEL  
 114-Spleen\_GSM258767.CEL  
 115-Neuro2a\_GSM258728.CEL  
 116-Neuro2a\_GSM258728.CEL  
 117-Lymph-nodes\_GSM258691.CEL  
 118-Lymph-nodes\_GSM258691.CEL  
 119-Intestine-small\_GSM258677.CEL  
 120-Intestine-large\_GSM258677.CEL  
 121-Intestine-large\_GSM258676.CEL  
 122-Intestine-large\_GSM258675.CEL  
 123-Colon-d4\_GSM198810.CEL  
 124-Colon-d4\_GSM198810.CEL  
 125-Colon-d9\_GSM198810.CEL  
 126-Colon-d9\_GSM198810.CEL  
 127-NALT\_GSM289408.CEL  
 128-NALT\_GSM289409.CEL  
 129-NALT\_GSM289410.CEL  
 130-NALT\_GSM289411.CEL



Cluster0035\_High in some granulocytes (66 nodes)

2,485.7  
2,354.9  
2,224  
2,093.2  
1,962.4  
1,831.6  
1,700.7  
1,569.9  
1,439.1  
1,308.3  
1,177.4  
1,046.6  
915.8  
785  
654.1  
523.3  
392.5  
261.7  
130.8  
0

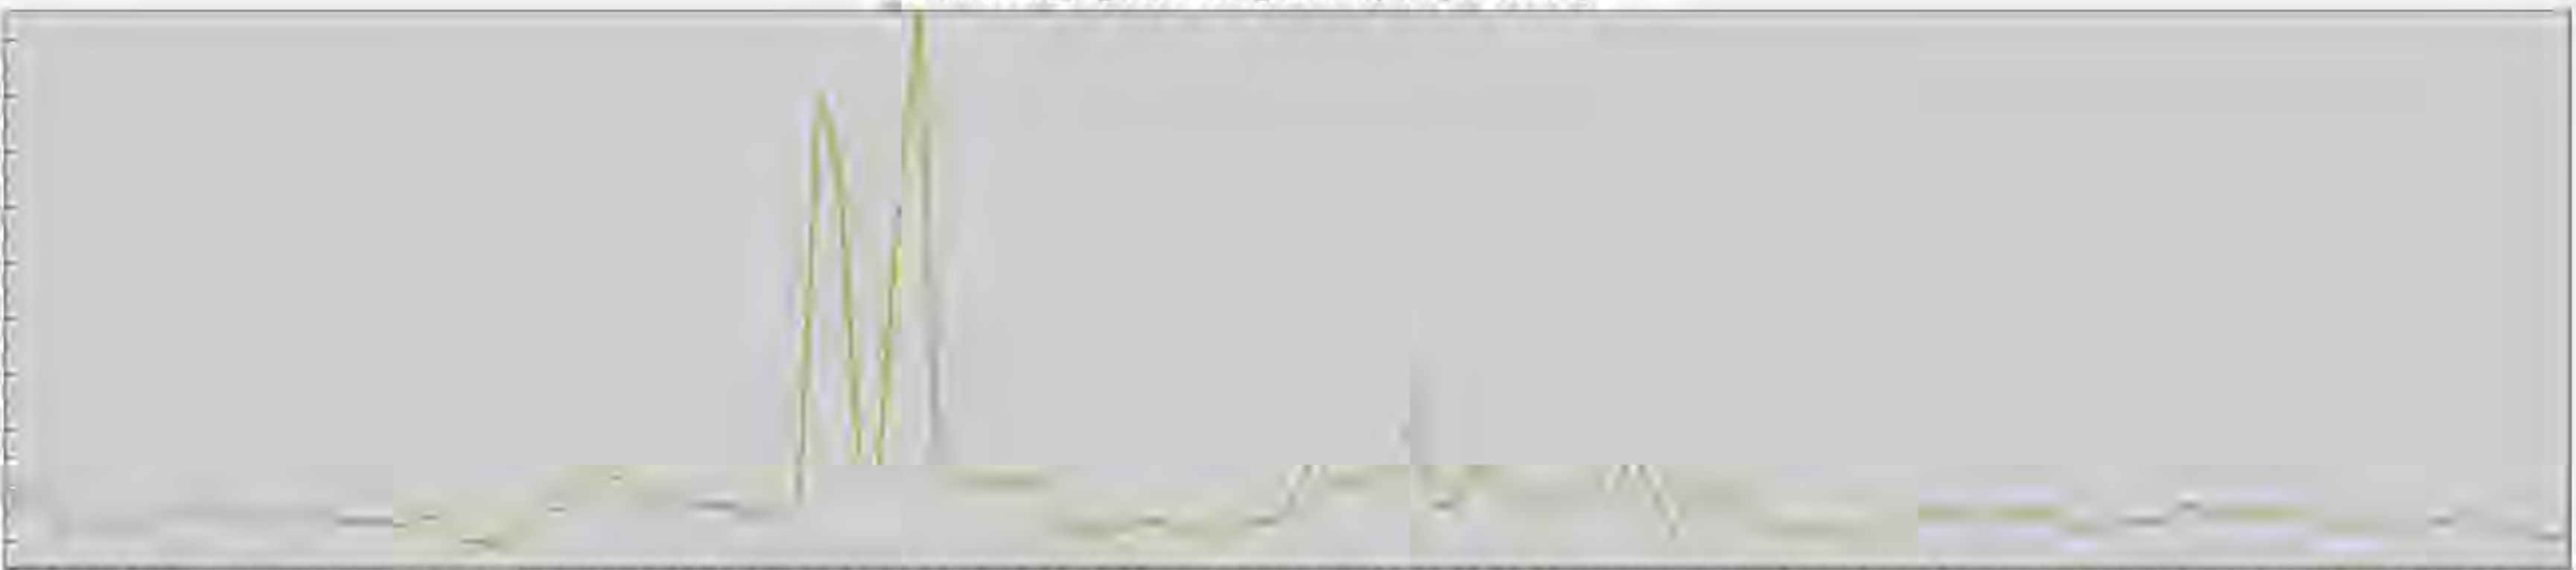

130-NALT GSM289411 CELL  
129-NALT GSM289410 CELL  
128-NALT GSM289409 CELL  
127-NALT GSM289408 CELL  
126-CD9 GSM1988105 CELL  
125-CD9 GSM1988104 CELL  
124-CD9 GSM1988103 CELL  
123-CD9 GSM1988102 CELL  
122-CD9 GSM1988101 CELL  
121-Intestine-large GSM258676 CELL  
120-Intestine-large GSM258675 CELL  
119-Intestine-small GSM258674 CELL  
118-Intestine-small GSM258673 CELL  
117-Lymph-nodes GSM258672 CELL  
116-Lymph-nodes GSM258671 CELL  
115-Spleen GSM258767 CELL  
114-Spleen GSM258766 CELL  
113-Neuro2a GSM258728 CELL  
112-Neuro2a GSM258727 CELL  
111-Astrocytes GSM241898 CELL  
110-mimb GSM258726 CELL  
109-mimb GSM258725 CELL  
108-MIMCD3 GSM258724 CELL  
107-MIMCD3 GSM258723 CELL  
106-Bruce4 GSM258665 CELL  
105-Bruce4 GSM258664 CELL  
104-C2C12 GSM258690 CELL  
103-C2C12 GSM258689 CELL  
102-NH3T3 GSM258730 CELL  
101-NH3T3 GSM258729 CELL  
100-3T3-L1 GSM258610 CELL  
99-3T3-L1 GSM258609 CELL  
98-10T1/2 GSM258632 CELL  
97-10T1/2 GSM258631 CELL  
96-Osteoblast-d21 GSM258740 CELL  
95-Osteoblast-d21 GSM258739 CELL  
94-Osteoblast-d14 GSM258738 CELL  
93-Osteoblast-d14 GSM258737 CELL  
92-Osteoblast-d5 GSM258742 CELL  
91-Osteoblast-d5 GSM258741 CELL  
90-Chondrocytes GSM266741 CELL  
89-Chondrocytes GSM266740 CELL  
88-Nat Helper cell GSM465594 CELL  
87-Nat Helper cell GSM465593 CELL  
86-TT cell GSM465596 CELL  
85-MS-1 GSM234692 CELL  
84-Lymph-endo-cells GSM143704 CELL  
83-PP-FDC GSM481977 CELL  
82-PP-FDC GSM481978 CELL  
81-PP-FDC GSM481976 CELL  
80-L-Y RMLNDCC003001 CELL  
79-L-Y RMLNDCC003001 CELL  
78-Follicular-Bcells GSM258664 CELL  
77-Follicular-Bcells GSM258663 CELL  
76-MZ-Bcell GSM258627 CELL  
75-MZ-Bcell GSM258627 CELL  
74-BAF3 GSM258620 CELL  
73-BAF3 GSM258619 CELL  
72-Tregs GSM258778 CELL  
71-Tregs GSM258777 CELL  
70-T-cells-CD8+ GSM258776 CELL  
69-T-cells-CD8+ GSM258774 CELL  
68-T-cells-CD4+ GSM258773 CELL  
67-T-cells-CD4+ GSM258773 CELL  
66-Thymocyte-DN GSM465595 CELL  
65-Osteoclasts GSM258743 CELL  
64-Osteoclasts GSM258743 CELL  
63-Microglia GSM258721 CELL  
62-Microglia GSM258721 CELL  
61-PM-M-PS-7h GSM258706 CELL  
60-PM-M-PS-7h GSM258706 CELL  
59-PM-M-PS-7h GSM258702 CELL  
58-PM-M-PS-6h GSM258700 CELL  
57-PM-M-PS-6h GSM258699 CELL  
56-PM-M-PS-6h GSM258699 CELL  
55-PM-M-PS-6h GSM258699 CELL  
54-PM-M-PS-6h GSM258699 CELL  
53-PM-M-PS-6h GSM258699 CELL  
52-PM-M-PS-6h GSM258699 CELL  
51-PM-M-PS-6h GSM258699 CELL  
50-PM-M-PS-6h GSM258699 CELL  
49-PM-M-PS-6h GSM258699 CELL  
48-PM-M-PS-6h GSM258699 CELL  
47-PM-M-PS-6h GSM258699 CELL  
46-NK-cells GSM258732 CELL  
45-NK-cells GSM258732 CELL  
44-Mast-cells-IgE+Ad GSM258719 CELL  
43-Mast-cells-IgE+Ad GSM258719 CELL  
42-Mast-cells-IgE GSM258713 CELL  
41-Mast-cells-IgE GSM258713 CELL  
40-Mast-cells-IgE GSM258713 CELL  
39-Granulocytes GSM258667 CELL  
38-Granulocytes GSM258667 CELL  
37-GMP GSM258666 CELL  
36-GMP GSM258666 CELL  
35-GMP GSM258666 CELL  
34-GMP GSM258666 CELL  
33-MEP GSM258720 CELL  
32-MEP GSM258720 CELL  
31-MEP GSM258720 CELL  
30-HSC GSM258770 CELL  
29-Bone marrow GSM258628 CELL  
28-Bone marrow GSM258627 CELL  
27-paneth-cells-GF GSM116358 CELL  
26-paneth-cells-GF GSM116357 CELL  
25-paneth-cells-GF GSM116350 CELL  
24-paneth-cells-GF GSM116350 CELL  
23-paneth-cells-GF GSM116350 CELL  
22-paneth-cells-GF GSM116350 CELL  
21-paneth-cells-GF GSM116350 CELL  
20-Colon-Crypt GSM480374 CELL  
19-Colon-Vill GSM480363 CELL  
18-Colon-Vill GSM480362 CELL  
17-Colon-IEC-GF GSM349880 CELL  
16-Colon-IEC-GF GSM350375 CELL  
15-Ileum-IEC-GF GSM350376 CELL  
14-Ileum-IEC GSM350371 CELL  
13-Small-intestine-epithelium RMINEP002001 CELL  
12-Small-intestine-epithelium RMINEP001001 CELL  
11-FAE-RMPYEP002001 CELL  
10-FAE-RMPYEP001001 CELL  
9-Ileum-IEC GSM190797 CELL  
8-Ileum-IEC GSM190796 CELL  
7-Ileum-IEC GSM190795 CELL  
6-CT-v-M-cells GSM190794 CELL  
5-CT-v-M-cells GSM190793 CELL  
4-CT-v-M-cells GSM190792 CELL  
3-PP-M-cells GSM190791 CELL  
2-PP-M-cells GSM190790 CELL  
1-PP-M-cells GSM190789 CELL







Cluster0037\_High in MIMCD3 renal inner medullary epithelial cell (65 nodes)

1,284.4  
1,216.8  
1,148.2  
1,081.6  
1,014  
946.4  
878.8  
811.2  
743.6  
676  
608.4  
540.8  
473.2  
405.6  
338  
270.4  
202.8  
135.2  
67.6  
0

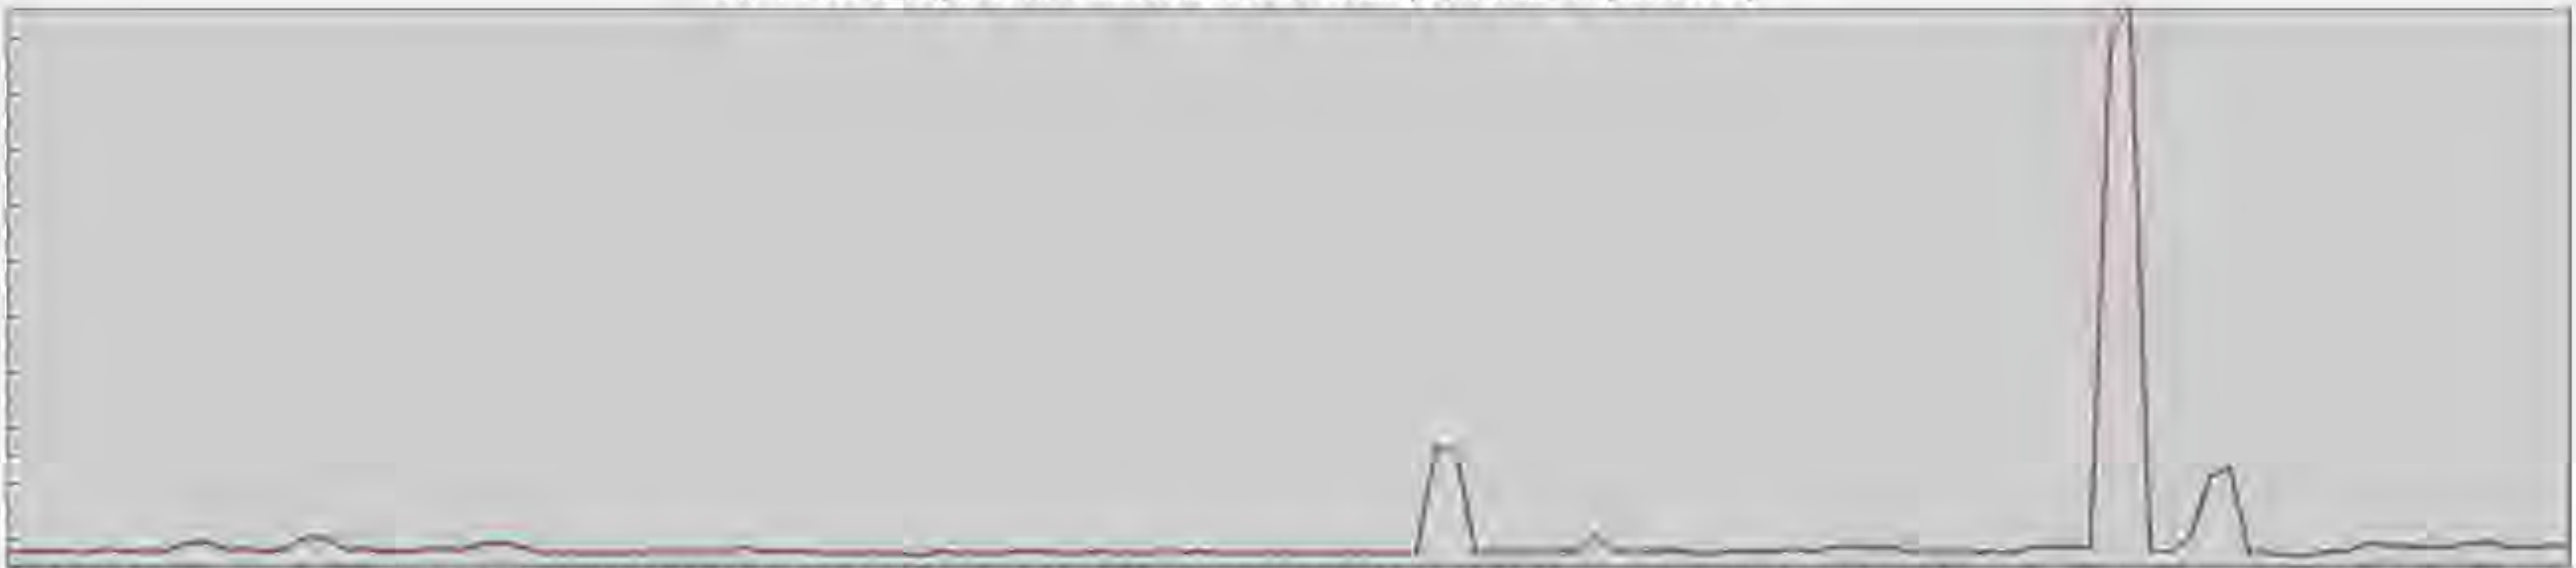

|     |                            |              |     |
|-----|----------------------------|--------------|-----|
| 01  | PP-M-cells                 | GSM190789    | CEL |
| 02  | PP-M-cells                 | GSM190790    | CEL |
| 03  | PP-M-cells                 | GSM190791    | CEL |
| 04  | CT-Y-M-cells               | GSM190792    | CEL |
| 05  | CT-Y-M-cells               | GSM190793    | CEL |
| 06  | CT-W-M-cells               | GSM190794    | CEL |
| 07  | Ileum-IEC                  | GSM190795    | CEL |
| 08  | Ileum-IEC                  | GSM190796    | CEL |
| 09  | Ileum-IEC                  | GSM190797    | CEL |
| 10  | FAE-RMP                    | GSM190798    | CEL |
| 11  | FAE-RMP                    | GSM190799    | CEL |
| 12  | Small intestine-epithelium | RMINEP001001 | CEL |
| 13  | Small intestine-epithelium | RMINEP002001 | CEL |
| 14  | Ileum-IEC                  | GSM350371    | CEL |
| 15  | Colon-IEC                  | GSM350375    | CEL |
| 16  | Colon-VIII                 | GSM480362    | cel |
| 17  | Colon-VIII                 | GSM480363    | cel |
| 18  | Colon-VIII                 | GSM480364    | cel |
| 19  | Colon-Crypt                | GSM480374    | cel |
| 20  | Colon-Crypt                | GSM480375    | cel |
| 21  | Colon-Crypt                | GSM480376    | cel |
| 22  | Paneth-cells               | GSM318589    | CEL |
| 23  | Paneth-cells               | GSM318590    | CEL |
| 24  | Paneth-cells               | GSM116359    | CEL |
| 25  | Paneth-cells               | GSM116360    | CEL |
| 26  | Paneth-cells               | GSM116361    | CEL |
| 27  | Paneth-cells               | GSM116362    | CEL |
| 28  | Paneth-cells               | GSM116363    | CEL |
| 29  | Bone marrow                | GSM258877    | CEL |
| 30  | NALT                       | GSM289411    | CEL |
| 31  | NALT                       | GSM289410    | CEL |
| 32  | NALT                       | GSM289409    | CEL |
| 33  | NALT                       | GSM289408    | CEL |
| 34  | Colon-d9                   | GSM198810    | CEL |
| 35  | Colon-d9                   | GSM198811    | CEL |
| 36  | Colon-d9                   | GSM198812    | CEL |
| 37  | Colon-d4                   | GSM198813    | CEL |
| 38  | Colon-d4                   | GSM198814    | CEL |
| 39  | Colon-d4                   | GSM198815    | CEL |
| 40  | Intestine-large            | GSM258676    | CEL |
| 41  | Intestine-large            | GSM258677    | CEL |
| 42  | Intestine-large            | GSM258678    | CEL |
| 43  | Intestine-small            | GSM258679    | CEL |
| 44  | Intestine-small            | GSM258680    | CEL |
| 45  | Lymph-nodes                | GSM258681    | CEL |
| 46  | Lymph-nodes                | GSM258682    | CEL |
| 47  | Spleen                     | GSM258683    | CEL |
| 48  | Spleen                     | GSM258684    | CEL |
| 49  | Neuro2a                    | GSM241898    | CEL |
| 50  | Neuro2a                    | GSM241899    | CEL |
| 51  | Astrocytes                 | GSM241900    | CEL |
| 52  | mim6                       | GSM258726    | CEL |
| 53  | mim6                       | GSM258727    | CEL |
| 54  | mim6                       | GSM258728    | CEL |
| 55  | MIMCD3                     | GSM258729    | CEL |
| 56  | MIMCD3                     | GSM258730    | CEL |
| 57  | MIMCD3                     | GSM258731    | CEL |
| 58  | Bruc4                      | GSM258732    | CEL |
| 59  | Bruc4                      | GSM258733    | CEL |
| 60  | Bruc4                      | GSM258734    | CEL |
| 61  | Bruc4                      | GSM258735    | CEL |
| 62  | C2C12                      | GSM258736    | CEL |
| 63  | C2C12                      | GSM258737    | CEL |
| 64  | C2C12                      | GSM258738    | CEL |
| 65  | C2C12                      | GSM258739    | CEL |
| 66  | NH3T3                      | GSM258740    | CEL |
| 67  | NH3T3                      | GSM258741    | CEL |
| 68  | NH3T3                      | GSM258742    | CEL |
| 69  | NH3T3                      | GSM258743    | CEL |
| 70  | 3T3-L1                     | GSM258744    | CEL |
| 71  | 3T3-L1                     | GSM258745    | CEL |
| 72  | 3T3-L1                     | GSM258746    | CEL |
| 73  | 3T3-L1                     | GSM258747    | CEL |
| 74  | 10T1/2                     | GSM258748    | CEL |
| 75  | 10T1/2                     | GSM258749    | CEL |
| 76  | Osteoblast-d21             | GSM258750    | CEL |
| 77  | Osteoblast-d21             | GSM258751    | CEL |
| 78  | Osteoblast-d14             | GSM258752    | CEL |
| 79  | Osteoblast-d14             | GSM258753    | CEL |
| 80  | Osteoblast-d5              | GSM258754    | CEL |
| 81  | Osteoblast-d5              | GSM258755    | CEL |
| 82  | Chondrocytes               | GSM258756    | CEL |
| 83  | Chondrocytes               | GSM258757    | CEL |
| 84  | Chondrocytes               | GSM258758    | CEL |
| 85  | Chondrocytes               | GSM258759    | CEL |
| 86  | Nat Helper cell            | GSM465593    | CEL |
| 87  | Nat Helper cell            | GSM465594    | CEL |
| 88  | Nat Helper cell            | GSM465595    | CEL |
| 89  | MS-1                       | GSM234692    | CEL |
| 90  | MS-1                       | GSM234693    | CEL |
| 91  | MS-1                       | GSM234694    | CEL |
| 92  | MS-1                       | GSM234695    | CEL |
| 93  | MS-1                       | GSM234696    | CEL |
| 94  | MS-1                       | GSM234697    | CEL |
| 95  | MS-1                       | GSM234698    | CEL |
| 96  | MS-1                       | GSM234699    | CEL |
| 97  | MS-1                       | GSM234700    | CEL |
| 98  | MS-1                       | GSM234701    | CEL |
| 99  | MS-1                       | GSM234702    | CEL |
| 100 | MS-1                       | GSM234703    | CEL |
| 101 | MS-1                       | GSM234704    | CEL |
| 102 | MS-1                       | GSM234705    | CEL |
| 103 | MS-1                       | GSM234706    | CEL |
| 104 | MS-1                       | GSM234707    | CEL |
| 105 | MS-1                       | GSM234708    | CEL |
| 106 | MS-1                       | GSM234709    | CEL |
| 107 | MS-1                       | GSM234710    | CEL |
| 108 | MS-1                       | GSM234711    | CEL |
| 109 | MS-1                       | GSM234712    | CEL |
| 110 | MS-1                       | GSM234713    | CEL |
| 111 | MS-1                       | GSM234714    | CEL |
| 112 | MS-1                       | GSM234715    | CEL |
| 113 | MS-1                       | GSM234716    | CEL |
| 114 | MS-1                       | GSM234717    | CEL |
| 115 | MS-1                       | GSM234718    | CEL |
| 116 | MS-1                       | GSM234719    | CEL |
| 117 | MS-1                       | GSM234720    | CEL |
| 118 | MS-1                       | GSM234721    | CEL |
| 119 | MS-1                       | GSM234722    | CEL |
| 120 | MS-1                       | GSM234723    | CEL |
| 121 | MS-1                       | GSM234724    | CEL |
| 122 | MS-1                       | GSM234725    | CEL |
| 123 | MS-1                       | GSM234726    | CEL |
| 124 | MS-1                       | GSM234727    | CEL |
| 125 | MS-1                       | GSM234728    | CEL |
| 126 | MS-1                       | GSM234729    | CEL |
| 127 | MS-1                       | GSM234730    | CEL |
| 128 | MS-1                       | GSM234731    | CEL |
| 129 | MS-1                       | GSM234732    | CEL |
| 130 | MS-1                       | GSM234733    | CEL |



Cluster0038\_Lymphatic endothelium-related (65 nodes)

2,519.1  
2,388.6  
2,253.9  
2,121.4  
1,988.8  
1,856.2  
1,723.6  
1,591  
1,458.4  
1,325.8  
1,193.3  
1,060.7  
928.1  
795.5  
662.9  
530.3  
397.8  
265.2  
132.6  
0

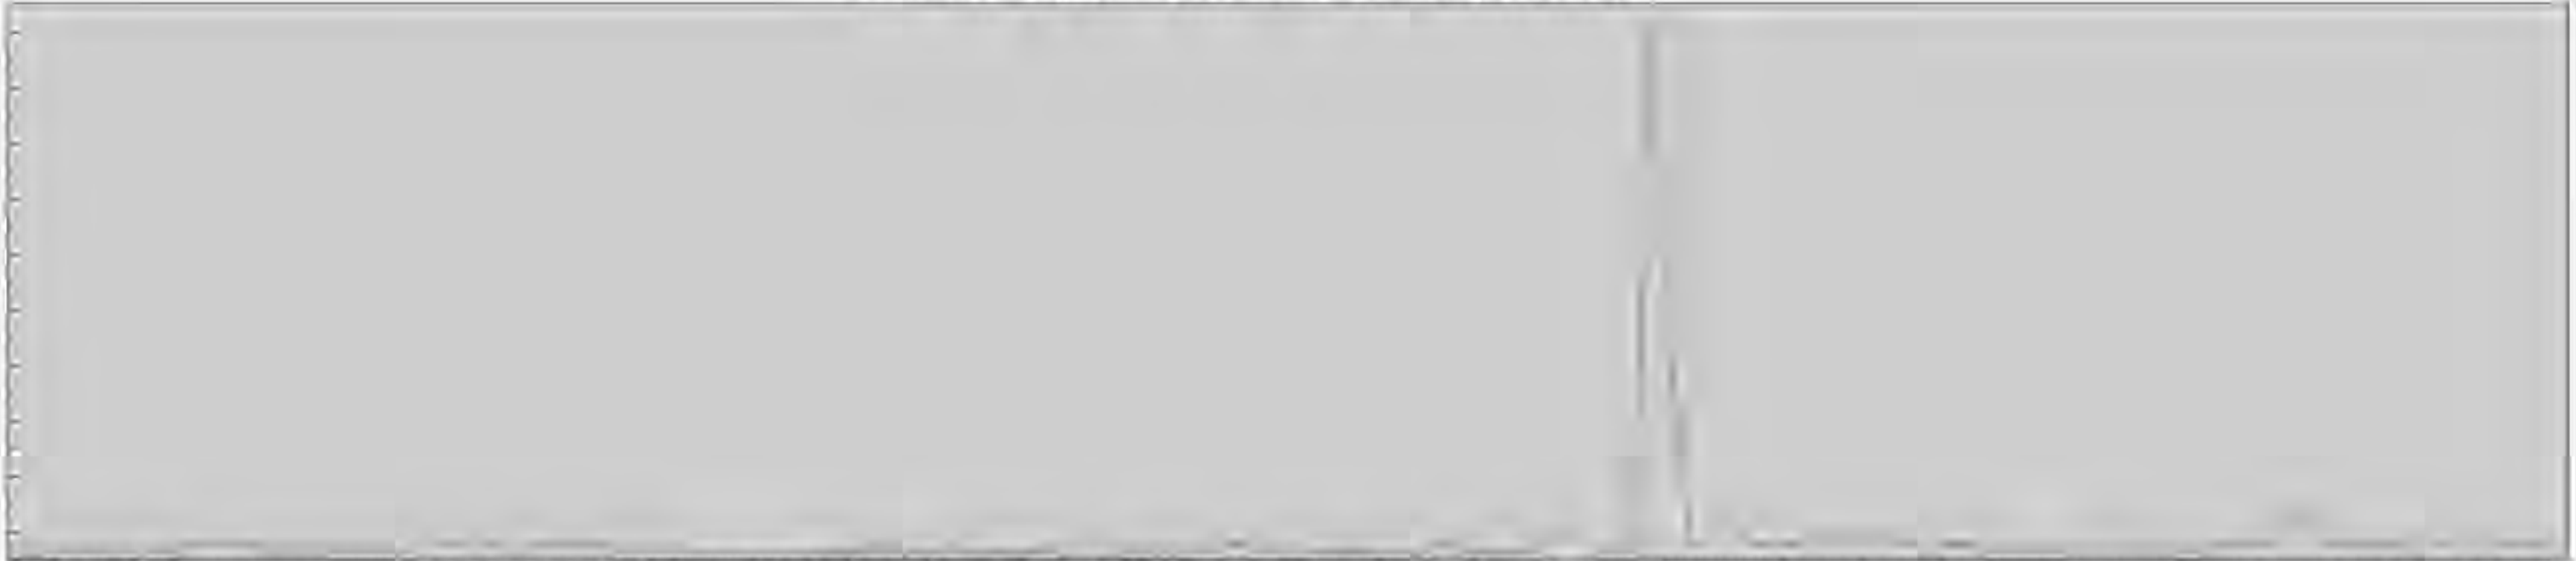

|    |                    |              |     |
|----|--------------------|--------------|-----|
| 30 | NALT               | GSM2899411   | CEL |
| 29 | NALT               | GSM2899410   | CEL |
| 28 | NALT               | GSM2899409   | CEL |
| 27 | NALT               | GSM2899408   | CEL |
| 26 | Colon-d9           | GSM1988104   | CEL |
| 25 | Colon-d9           | GSM1988103   | CEL |
| 24 | Colon-d9           | GSM1988102   | CEL |
| 23 | Colon-d4           | GSM1988101   | CEL |
| 22 | Colon-d4           | GSM1988100   | CEL |
| 21 | Intestine-large    | GSM258676    | CEL |
| 20 | Intestine-large    | GSM258675    | CEL |
| 19 | Intestine-small    | GSM258678    | CEL |
| 18 | Intestine-small    | GSM258677    | CEL |
| 17 | Lymph-nodes        | GSM258691    | CEL |
| 16 | Spleen             | GSM258768    | CEL |
| 15 | Spleen             | GSM258767    | CEL |
| 14 | Neuro2a            | GSM258728    | CEL |
| 13 | Neuro2a            | GSM258727    | CEL |
| 12 | Astrocytes         | GSM241898    | CEL |
| 11 | ming               | GSM258726    | CEL |
| 10 | ming               | GSM258725    | CEL |
| 09 | ming               | GSM258724    | CEL |
| 08 | MIMCD3             | GSM258723    | CEL |
| 07 | MIMCD3             | GSM258722    | CEL |
| 06 | Bruce4             | GSM258690    | CEL |
| 05 | Bruce4             | GSM258689    | CEL |
| 04 | C2C12              | GSM258688    | CEL |
| 03 | C2C12              | GSM258687    | CEL |
| 02 | NH3T3              | GSM258730    | CEL |
| 01 | NH3T3              | GSM258729    | CEL |
| 99 | 3T3-L1             | GSM258610    | CEL |
| 98 | 3T3-L1             | GSM258609    | CEL |
| 97 | 10T12              | GSM258632    | CEL |
| 96 | Osteoblast-d21     | GSM258740    | CEL |
| 95 | Osteoblast-d21     | GSM258739    | CEL |
| 94 | Osteoblast-d14     | GSM258738    | CEL |
| 93 | Osteoblast-d14     | GSM258737    | CEL |
| 92 | Osteoblast-d5      | GSM258742    | CEL |
| 91 | Osteoblast-d5      | GSM258741    | CEL |
| 90 | Chondrocytes       | GSM266741    | CEL |
| 89 | Chondrocytes       | GSM266740    | CEL |
| 88 | Nat_Helper cell    | GSM465594    | CEL |
| 87 | Nat_Helper cell    | GSM465593    | CEL |
| 86 | T cell             | GSM465596    | CEL |
| 85 | MS-1               | GSM234692    | CEL |
| 84 | Lymph-endo-cells   | GSM143704    | CEL |
| 83 | PP-FDC             | GSM481977    | CEL |
| 82 | PP-FDC             | GSM481978    | CEL |
| 81 | PP-FDC             | GSM481976    | CEL |
| 80 | E-L                | RMLNDC003001 | CEL |
| 79 | E-L                | RMLNDC003001 | CEL |
| 78 | Follicular-B cells | GSM258654    | CEL |
| 77 | Follicular-B cells | GSM258653    | CEL |
| 76 | MZ-B cell          | GSM258622    | CEL |
| 75 | MZ-B cell          | GSM258621    | CEL |
| 74 | BAF3               | GSM258620    | CEL |
| 73 | BAF3               | GSM258619    | CEL |
| 72 | Tregs              | GSM258778    | CEL |
| 71 | Tregs              | GSM258777    | CEL |
| 70 | T-cells-CD8+       | GSM258776    | CEL |
| 69 | T-cells-CD8+       | GSM258775    | CEL |
| 68 | T-cells-CD4+       | GSM258774    | CEL |
| 67 | T-cells-CD4+       | GSM258773    | CEL |
| 66 | Thymocyte-DN       | GSM465595    | CEL |
| 65 | Osteoclasts        | GSM258743    | CEL |
| 64 | Microglia          | GSM258721    | CEL |
| 63 | Microglia          | GSM258720    | CEL |
| 62 | PS-7h              | GSM258705    | CEL |
| 61 | PS-7h              | GSM258704    | CEL |
| 60 | PS-6h              | GSM258702    | CEL |
| 59 | PS-6h              | GSM258701    | CEL |
| 58 | PS-6h              | GSM258699    | CEL |
| 57 | PS-6h              | GSM258698    | CEL |
| 56 | PS-6h              | GSM258694    | CEL |
| 55 | PS-6h              | GSM258693    | CEL |
| 54 | PS-6h              | GSM258692    | CEL |
| 53 | PS-6h              | GSM258691    | CEL |
| 52 | PS-6h              | GSM258649    | CEL |
| 51 | PS-6h              | GSM258648    | CEL |
| 50 | PS-6h              | GSM258647    | CEL |
| 49 | PS-6h              | GSM258646    | CEL |
| 48 | PS-6h              | GSM258645    | CEL |
| 47 | PS-6h              | GSM258732    | CEL |
| 46 | PS-6h              | GSM258731    | CEL |
| 45 | PS-6h              | GSM258718    | CEL |
| 44 | PS-6h              | GSM258717    | CEL |
| 43 | PS-6h              | GSM258714    | CEL |
| 42 | PS-6h              | GSM258713    | CEL |
| 41 | PS-6h              | GSM258712    | CEL |
| 40 | PS-6h              | GSM258667    | CEL |
| 39 | PS-6h              | GSM258666    | CEL |
| 38 | PS-6h              | GSM258665    | CEL |
| 37 | PS-6h              | GSM258664    | CEL |
| 36 | PS-6h              | GSM258663    | CEL |
| 35 | PS-6h              | GSM258662    | CEL |
| 34 | PS-6h              | GSM258661    | CEL |
| 33 | PS-6h              | GSM258660    | CEL |
| 32 | PS-6h              | GSM258659    | CEL |
| 31 | PS-6h              | GSM258658    | CEL |
| 30 | PS-6h              | GSM258657    | CEL |
| 29 | PS-6h              | GSM258656    | CEL |
| 28 | PS-6h              | GSM258655    | CEL |
| 27 | PS-6h              | GSM258654    | CEL |
| 26 | PS-6h              | GSM258653    | CEL |
| 25 | PS-6h              | GSM258652    | CEL |
| 24 | PS-6h              | GSM258651    | CEL |
| 23 | PS-6h              | GSM258650    | CEL |
| 22 | PS-6h              | GSM258649    | CEL |
| 21 | PS-6h              | GSM258648    | CEL |
| 20 | PS-6h              | GSM258647    | CEL |
| 19 | PS-6h              | GSM258646    | CEL |
| 18 | PS-6h              | GSM258645    | CEL |
| 17 | PS-6h              | GSM258644    | CEL |
| 16 | PS-6h              | GSM258643    | CEL |
| 15 | PS-6h              | GSM258642    | CEL |
| 14 | PS-6h              | GSM258641    | CEL |
| 13 | PS-6h              | GSM258640    | CEL |
| 12 | PS-6h              | GSM258639    | CEL |
| 11 | PS-6h              | GSM258638    | CEL |
| 10 | PS-6h              | GSM258637    | CEL |
| 09 | PS-6h              | GSM258636    | CEL |
| 08 | PS-6h              | GSM258635    | CEL |
| 07 | PS-6h              | GSM258634    | CEL |
| 06 | PS-6h              | GSM258633    | CEL |
| 05 | PS-6h              | GSM258632    | CEL |
| 04 | PS-6h              | GSM258631    | CEL |
| 03 | PS-6h              | GSM258630    | CEL |
| 02 | PS-6h              | GSM258629    | CEL |
| 01 | PS-6h              | GSM258628    | CEL |
| 00 | PS-6h              | GSM258627    | CEL |
| 00 | PS-6h              | GSM258626    | CEL |
| 00 | PS-6h              | GSM258625    | CEL |
| 00 | PS-6h              | GSM258624    | CEL |
| 00 | PS-6h              | GSM258623    | CEL |
| 00 | PS-6h              | GSM258622    | CEL |
| 00 | PS-6h              | GSM258621    | CEL |
| 00 | PS-6h              | GSM258620    | CEL |
| 00 | PS-6h              | GSM258619    | CEL |
| 00 | PS-6h              | GSM258618    | CEL |
| 00 | PS-6h              | GSM258617    | CEL |
| 00 | PS-6h              | GSM258616    | CEL |
| 00 | PS-6h              | GSM258615    | CEL |
| 00 | PS-6h              | GSM258614    | CEL |
| 00 | PS-6h              | GSM258613    | CEL |
| 00 | PS-6h              | GSM258612    | CEL |
| 00 | PS-6h              | GSM258611    | CEL |
| 00 | PS-6h              | GSM258610    | CEL |
| 00 | PS-6h              | GSM258609    | CEL |
| 00 | PS-6h              | GSM258608    | CEL |
| 00 | PS-6h              | GSM258607    | CEL |
| 00 | PS-6h              | GSM258606    | CEL |
| 00 | PS-6h              | GSM258605    | CEL |
| 00 | PS-6h              | GSM258604    | CEL |
| 00 | PS-6h              | GSM258603    | CEL |
| 00 | PS-6h              | GSM258602    | CEL |
| 00 | PS-6h              | GSM258601    | CEL |
| 00 | PS-6h              | GSM258600    | CEL |
| 00 | PS-6h              | GSM258599    | CEL |
| 00 | PS-6h              | GSM258598    | CEL |
| 00 | PS-6h              | GSM258597    | CEL |
| 00 | PS-6h              | GSM258596    | CEL |
| 00 | PS-6h              | GSM258595    | CEL |
| 00 | PS-6h              | GSM258594    | CEL |
| 00 | PS-6h              | GSM258593    | CEL |
| 00 | PS-6h              | GSM258592    | CEL |
| 00 | PS-6h              | GSM258591    | CEL |
| 00 | PS-6h              | GSM258590    | CEL |
| 00 | PS-6h              | GSM258589    | CEL |
| 00 | PS-6h              | GSM258588    | CEL |
| 00 | PS-6h              | GSM258587    | CEL |
| 00 | PS-6h              | GSM258586    | CEL |
| 00 | PS-6h              | GSM258585    | CEL |
| 00 | PS-6h              | GSM258584    | CEL |
| 00 | PS-6h              | GSM258583    | CEL |
| 00 | PS-6h              | GSM258582    | CEL |
| 00 | PS-6h              | GSM258581    | CEL |
| 00 | PS-6h              | GSM258580    | CEL |
| 00 | PS-6h              | GSM258579    | CEL |
| 00 | PS-6h              | GSM258578    | CEL |
| 00 | PS-6h              | GSM258577    | CEL |
| 00 | PS-6h              | GSM258576    | CEL |
| 00 | PS-6h              | GSM258575    | CEL |
| 00 | PS-6h              | GSM258574    | CEL |
| 00 | PS-6h              | GSM258573    | CEL |
| 00 | PS-6h              | GSM258572    | CEL |
| 00 | PS-6h              | GSM258571    | CEL |
| 00 | PS-6h              | GSM258570    | CEL |
| 00 | PS-6h              | GSM258569    | CEL |
| 00 | PS-6h              | GSM258568    | CEL |
| 00 | PS-6h              | GSM258567    | CEL |
| 00 | PS-6h              | GSM258566    | CEL |
| 00 | PS-6h              | GSM258565    | CEL |
| 00 | PS-6h              | GSM258564    | CEL |
| 00 | PS-6h              | GSM258563    | CEL |
| 00 | PS-6h              | GSM258562    | CEL |
| 00 | PS-6h              | GSM258561    | CEL |
| 00 | PS-6h              | GSM258560    | CEL |
| 00 | PS-6h              | GSM258559    | CEL |
| 00 | PS-6h              | GSM258558    | CEL |
| 00 | PS-6h              | GSM258557    | CEL |
| 00 | PS-6h              | GSM258556    | CEL |
| 00 | PS-6h              | GSM258555    | CEL |
| 00 | PS-6h              | GSM258554    | CEL |
| 00 | PS-6h              | GSM258553    | CEL |
| 00 | PS-6h              | GSM258552    | CEL |
| 00 | PS-6h              | GSM258551    | CEL |
| 00 | PS-6h              | GSM258550    | CEL |
| 00 | PS-6h              | GSM258549    | CEL |
| 00 | PS-6h              | GSM258548    | CEL |
| 00 | PS-6h              | GSM258547    | CEL |
| 00 | PS-6h              | GSM258546    | CEL |
| 00 | PS-6h              | GSM258545    | CEL |
| 00 | PS-6h              | GSM258544    | CEL |
| 00 | PS-6h              | GSM258543    | CEL |
| 00 | PS-6h              | GSM258542    | CEL |
| 00 | PS-6h              | GSM258541    | CEL |
| 00 | PS-6h              | GSM258540    | CEL |
| 00 | PS-6h              | GSM258539    | CEL |
| 00 | PS-6h              | GSM258538    | CEL |
| 00 | PS-6h              | GSM258537    | CEL |
| 00 | PS-6h              | GSM258536    | CEL |
| 00 | PS-6h              | GSM258535    | CEL |
| 00 | PS-6h              | GSM258534    | CEL |
| 00 | PS-6h              | GSM258533    | CEL |
| 00 | PS-6h              | GSM258532    | CEL |
| 00 | PS-6h              | GSM258531    | CEL |
| 00 | PS-6h              | GSM258530    | CEL |
| 00 | PS-6h              | GSM258529    | CEL |
| 00 | PS-6h              | GSM258528    | CEL |
| 00 | PS-6h              | GSM258527    | CEL |
| 00 | PS-6h              | GSM258526    | CEL |
| 00 | PS-6h              | GSM258525    | CEL |
| 00 | PS-6h              | GSM258524    | CEL |
| 00 | PS-6h              | GSM258523    | CEL |
| 00 | PS-6h              | GSM258522    | CEL |
| 00 | PS-6h              | GSM258521    | CEL |
| 00 | PS-6h              | GSM258520    | CEL |
| 00 | PS-6h              | GSM258519    | CEL |
| 00 | PS-6h              | GSM258518    | CEL |
| 00 | PS-6h              | GSM258517    | CEL |
| 00 | PS-6h              | GSM258516    | CEL |
| 00 | PS-6h              | GSM258515    | CEL |
| 00 | PS-6h              | GSM258514    | CEL |
| 00 | PS-6h              | GSM258513    | CEL |
| 00 | PS-6h              | GSM258512    | CEL |
| 00 | PS-6h              | GSM258511    | CEL |
| 00 | PS-6h              | GSM258510    | CEL |
| 00 | PS-6h              | GSM258509    | CEL |
| 00 | PS-6h              | GSM258508    | CEL |
| 00 | PS-6h              | GSM258507    | CEL |
| 00 | PS-6h              | GSM258506    | CEL |
| 00 | PS-6h              | GSM258505    | CEL |
| 00 | PS-6h              | GSM258504    | CEL |
| 00 | PS-6h              | GSM258503    | CEL |
| 00 | PS-6h              | GSM258502    | CEL |
| 00 | PS-6h              | GSM258501    | CEL |
| 00 | PS-6h              | GSM258500    | CEL |
| 00 | PS-6h              | GSM258499    | CEL |
| 00 | PS-6h              | GSM258498    | CEL |
| 00 | PS-6h              | GSM258497    | CEL |
| 00 | PS-6h              | GSM258496    | CEL |
| 00 | PS-6h              | GSM258495    | CEL |
| 00 | PS-6h              | GSM258494    | CEL |
| 00 | PS-6h              | GSM258493    | CEL |
| 00 | PS-6h              | GSM258492    | CEL |
| 00 | PS-6h              | GSM258491    | CEL |
| 00 | PS-6h              | GSM258490    | CEL |
| 00 | PS-6h              | GSM258489    | CEL |
| 00 | PS-6h              | GSM258488    | CEL |
| 00 | PS-6h              | GSM258487    | CEL |
| 00 | PS-6h              | GSM258486    | CEL |
| 00 | PS-6h              | GSM258485    | CEL |
| 00 | PS-6h              | GSM258484    | CEL |
| 00 | PS-6h              | GSM258483    | CEL |
| 00 | PS-6h              | GSM258482    | CEL |
| 00 | PS-6h              | GSM258481    | CEL |
| 00 | PS-6h              | GSM258480    | CEL |
| 00 | PS-6h              | GSM258479    | CEL |
| 00 | PS-6h              | GSM258478    | CEL |
| 00 | PS-6h              | GSM258477    | CEL |
| 00 | PS-6h              | GSM258476    | CEL |
| 00 | PS-6h              | GSM258475    | CEL |
| 00 | PS-6h              | GSM258474    | CEL |
| 00 | PS-6h              | GSM258473    | CEL |
| 00 | PS-6h              | GSM258472    | CEL |
| 00 | PS-6h              | GSM258471    | CEL |
| 00 | PS-6h              | GSM258470    | CEL |
| 00 | PS-6h              | GSM258469    | CEL |
| 00 | PS-6h              | GSM258468    | CEL |
| 00 | PS-6h              | GSM258467    | CEL |
| 00 | PS-6h              | GSM258466    | CEL |
| 00 | PS-6h              | GSM258465    | CEL |
| 00 | PS-6h              | GSM258464    | CEL |
| 00 | PS-6h              | GSM258463    | CEL |
| 00 | PS-6h              | GSM258462    | CEL |
| 00 | PS-6h              | GSM258461    | CEL |
| 00 | PS-6h              | GSM258460    | CEL |
| 00 | PS-6h              | GSM258459    | CEL |
| 00 | PS-6h              | GSM258458    | CEL |
| 00 | PS-6h              | GSM258457    | CEL |
| 00 | PS-6h              | GSM258456    | CEL |
| 00 | PS-6h              | GSM258455    | CEL |
| 00 | PS-6h              | GSM258454    | CEL |
| 00 | PS-6h              | GSM258453    | CEL |
| 00 | PS-6h              | GSM258452    | CEL |
| 00 | PS-6h              | GSM258451    | CEL |
| 00 | PS-6h              | GSM258450    | CEL |
| 00 | PS-6h              | GSM258449    | CEL |
| 00 | PS-6h              | GSM258448    | CEL |



Cluster0039\_Mast cell-related (64 nodes)

5,366.7  
5,084.3  
4,801.8  
4,519.3  
4,236.9  
3,954.4  
3,672  
3,389.6  
3,107  
2,824.6  
2,542.1  
2,259.7  
1,977.2  
1,694.8  
1,412.3  
1,129.8  
847.4  
564.9  
282.5  
0

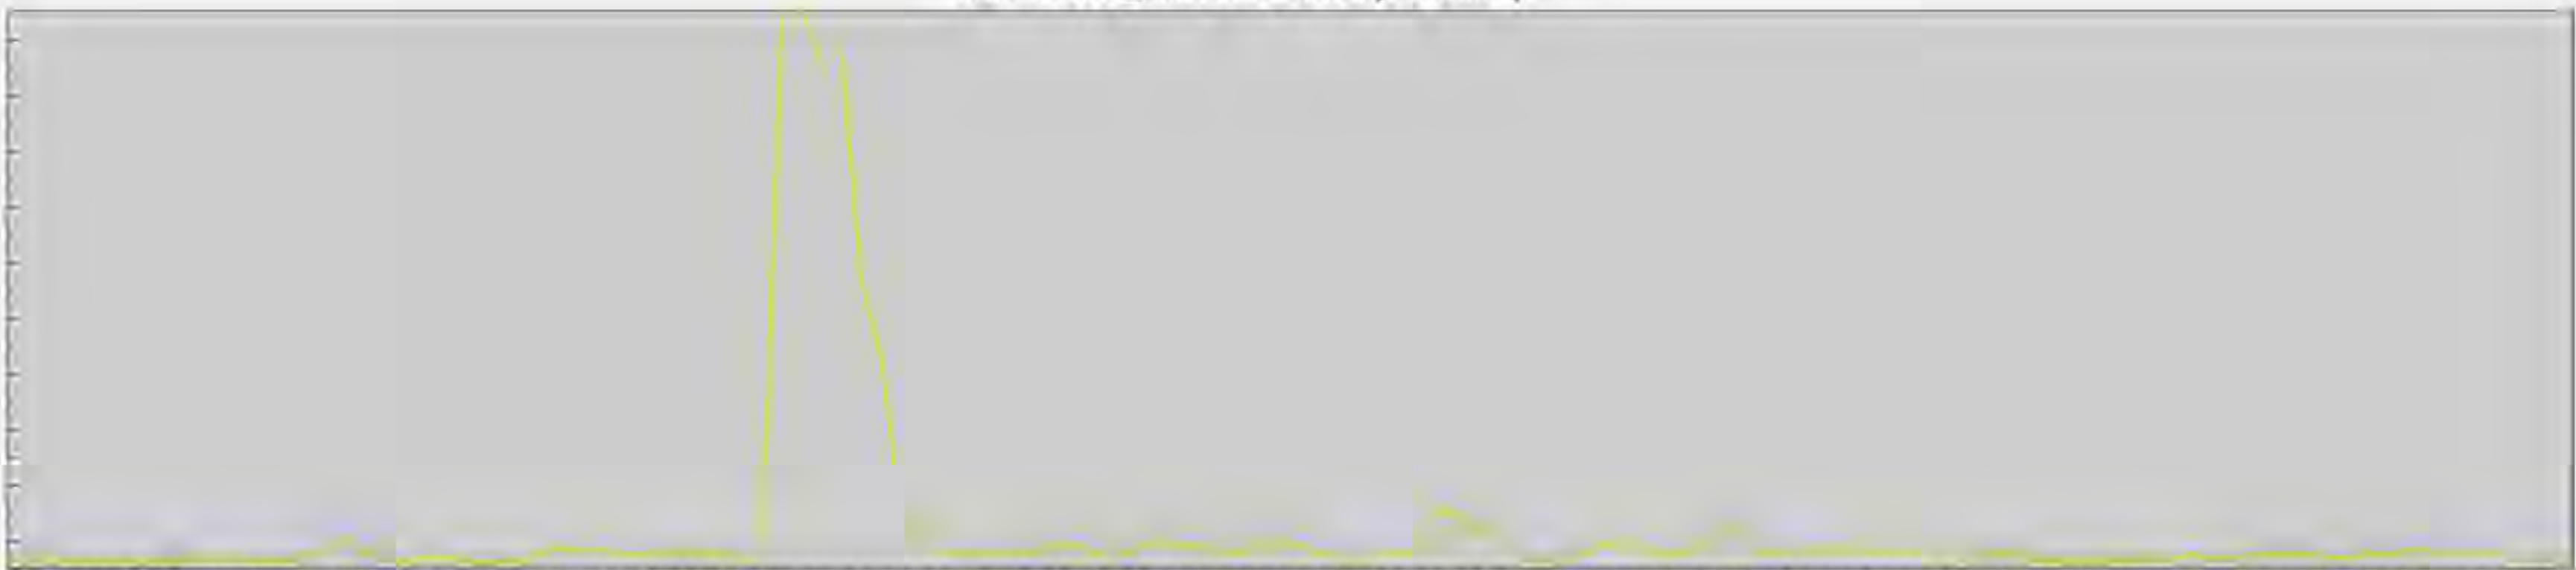

30-NALT GSM289411 CELL  
 129-NALT GSM289410 CELL  
 128-NALT GSM289409 CELL  
 127-NALT GSM289408 CELL  
 126-Color-d9 GSM1988105 CELL  
 125-Color-d9 GSM1988104 CELL  
 124-Color-d9 GSM1988103 CELL  
 123-Color-d4 GSM1988102 CELL  
 122-Color-d4 GSM1988101 CELL  
 121-Intestine-large GSM258676 CELL  
 120-Intestine-large GSM258675 CELL  
 119-Intestine-small GSM258674 CELL  
 118-Intestine-small GSM258673 CELL  
 117-Lymph-nodes GSM258672 CELL  
 116-Spleen GSM258671 CELL  
 115-Spleen GSM258670 CELL  
 114-Spleen GSM258669 CELL  
 113-Neuro2a GSM241898 CELL  
 112-Neuro2a GSM241897 CELL  
 111-Astrocytes GSM241896 CELL  
 110-mimb GSM258726 CELL  
 109-mimb GSM258725 CELL  
 108-MIMCD3 GSM258724 CELL  
 107-MIMCD3 GSM258723 CELL  
 106-Bruce4 GSM258665 CELL  
 105-Bruce4 GSM258664 CELL  
 104-C2C12 GSM258663 CELL  
 103-C2C12 GSM258662 CELL  
 102-NH3T3 GSM258739 CELL  
 101-NH3T3 GSM258738 CELL  
 100-3T3-L1 GSM258610 CELL  
 99-3T3-L1 GSM258609 CELL  
 98-10T12 GSM258632 CELL  
 97-10T12 GSM258631 CELL  
 96-Osteoblast-d21 GSM258740 CELL  
 95-Osteoblast-d21 GSM258739 CELL  
 94-Osteoblast-d14 GSM258738 CELL  
 93-Osteoblast-d14 GSM258737 CELL  
 92-Osteoblast-d5 GSM258742 CELL  
 91-Osteoblast-d5 GSM258741 CELL  
 90-Chondrocytes GSM266741 CELL  
 89-Chondrocytes GSM266740 CELL  
 88-Nat Helper cell GSM465594 CELL  
 87-Nat Helper cell GSM465593 CELL  
 86-TT cell GSM465596 CELL  
 85-M8-1 GSM234692 CELL  
 84-Lymph-endo-cells GSM143704 CELL  
 83-P-FDC GSM481977 CELL  
 82-P-FDC GSM481978 CELL  
 81-P-FDC GSM481976 CELL  
 80-L-Y RMLNDCC003001 CELL  
 79-L-Y RMLNDCC003001 CELL  
 78-Follicular-Bcells GSM258664 CELL  
 77-Follicular-Bcells GSM258663 CELL  
 76-MZ-Bcell GSM258627 CELL  
 75-MZ-Bcell GSM258627 CELL  
 74-BAF3 GSM258620 CELL  
 73-BAF3 GSM258619 CELL  
 72-Tregs GSM258778 CELL  
 71-Tregs GSM258777 CELL  
 70-T-cells-CD8+ GSM258776 CELL  
 69-T-cells-CD8+ GSM258774 CELL  
 68-T-cells-CD4+ GSM258773 CELL  
 67-T-cells-CD4+ GSM258773 CELL  
 66-Thymocyte-DN GSM465595 CELL  
 65-Osteoclasts GSM258743 CELL  
 64-Osteoclasts GSM258743 CELL  
 63-Microglia GSM258721 CELL  
 62-Microglia GSM258721 CELL  
 61-MM-LPS-7h GSM268706 CELL  
 60-MM-LPS-7h GSM268706 CELL  
 59-MM-LPS-6h GSM268700 CELL  
 58-MM-LPS-6h GSM268699 CELL  
 57-MM-LPS-6h GSM268699 CELL  
 56-MM-LPS-6h GSM268699 CELL  
 55-MM-LPS-6h GSM268699 CELL  
 54-MM-LPS-6h GSM268699 CELL  
 53-Ismacryoid-DC GSM258650 CELL  
 52-Ismacryoid-DC GSM258649 CELL  
 51-CD8a-DC GSM258648 CELL  
 50-CD8a-DC GSM258647 CELL  
 49-CD8a+DC GSM258646 CELL  
 48-CD8a+DC GSM258646 CELL  
 47-NK-cells GSM258732 CELL  
 46-NK-cells GSM258731 CELL  
 45-Mast-cells-IdU+Ad GSM258719 CELL  
 44-Mast-cells-IdU+Ad GSM258717 CELL  
 43-Mast-cells-IdU GSM258714 CELL  
 42-Mast-cells-IdU GSM258713 CELL  
 41-Mast-cells GSM258712 CELL  
 40-Granulocytes GSM258712 CELL  
 39-Granulocytes GSM258667 CELL  
 38-GMP GSM258666 CELL  
 37-GMP GSM258665 CELL  
 36-GMP GSM258664 CELL  
 35-GMP GSM258664 CELL  
 34-MPEP GSM258770 CELL  
 33-MPEP GSM258770 CELL  
 32-MPEP GSM258770 CELL  
 31-HESC GSM258770 CELL  
 30-HESC GSM258770 CELL  
 29-Bone marrow GSM258628 CELL  
 28-Bone marrow GSM258627 CELL  
 27-paneth-cells-GE GSM116358 CELL  
 26-paneth-cells-GE GSM116357 CELL  
 25-paneth-cells GSM116350 CELL  
 24-paneth-cells GSM116359 CELL  
 23-paneth-cells GSM318589 CELL  
 22-paneth-cells GSM318590 CELL  
 21-paneth-cells GSM480375 CELL  
 20-Colon-Crypt GSM480374 CELL  
 19-Colon-Vill GSM480363 CELL  
 18-Colon-Vill GSM480362 CELL  
 17-Colon-IEC-Gf GSM349880 CELL  
 16-Colon-IEC-Gf GSM350375 CELL  
 15-Ileum-IEC-Gf GSM350376 CELL  
 14-Ileum-IEC GSM350371 CELL  
 13-Small-intestine-epithelium RMINEP002901 CELL  
 12-Small-intestine-epithelium RMINEP001001 CELL  
 11-FAE-RMPYEP002001 CELL  
 10-FAE-RMPYEP001001 CELL  
 09-Ileum-IEC GSM190797 CELL  
 08-Ileum-IEC GSM190796 CELL  
 07-Ileum-IEC GSM190795 CELL  
 06-CT-w-M-cells GSM190794 CELL  
 05-CT-y-M-cells GSM190793 CELL  
 04-PP-M-cells GSM190792 CELL  
 03-PP-M-cells GSM190791 CELL  
 02-PP-M-cells GSM190790 CELL  
 01-PP-M-cells GSM190789 CELL



Cluster0040\_Low in some Paneth cells (62 nodes)

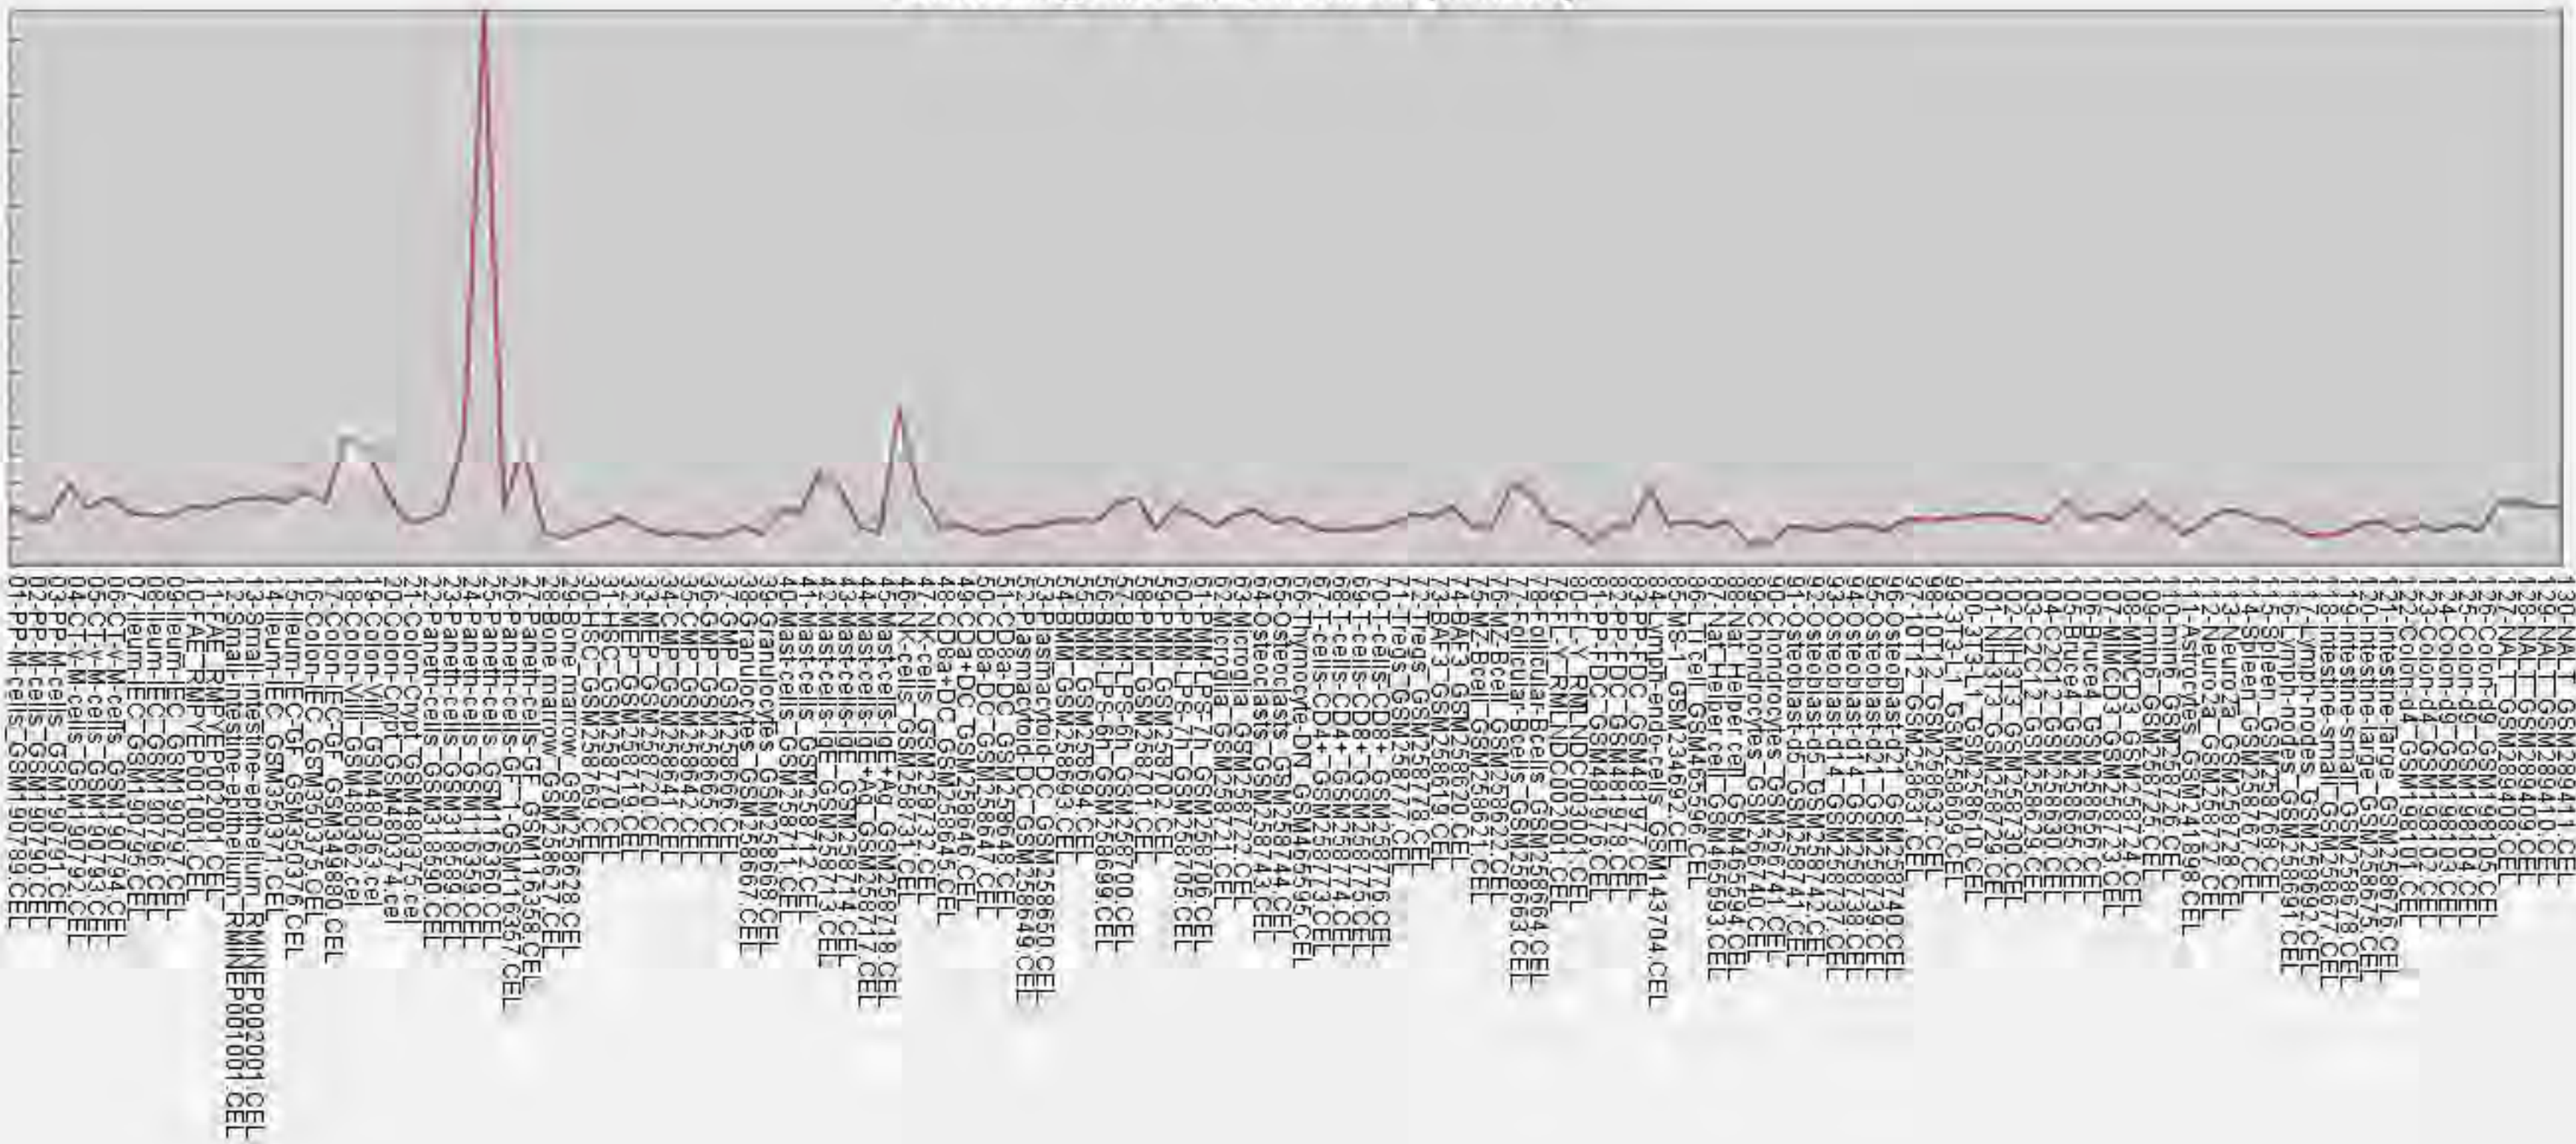



Cluster0041\_High in BAF3 interleukin 3-dependent pro-B cell line (58 nodes)

1,423.8  
1,348.9  
1,274  
1,199  
1,124.1  
1,049.1  
974.2  
899.3  
824.3  
749.4  
674.4  
599.5  
524.6  
449.6  
374.7  
299.8  
224.8  
149.9  
74.9  
0

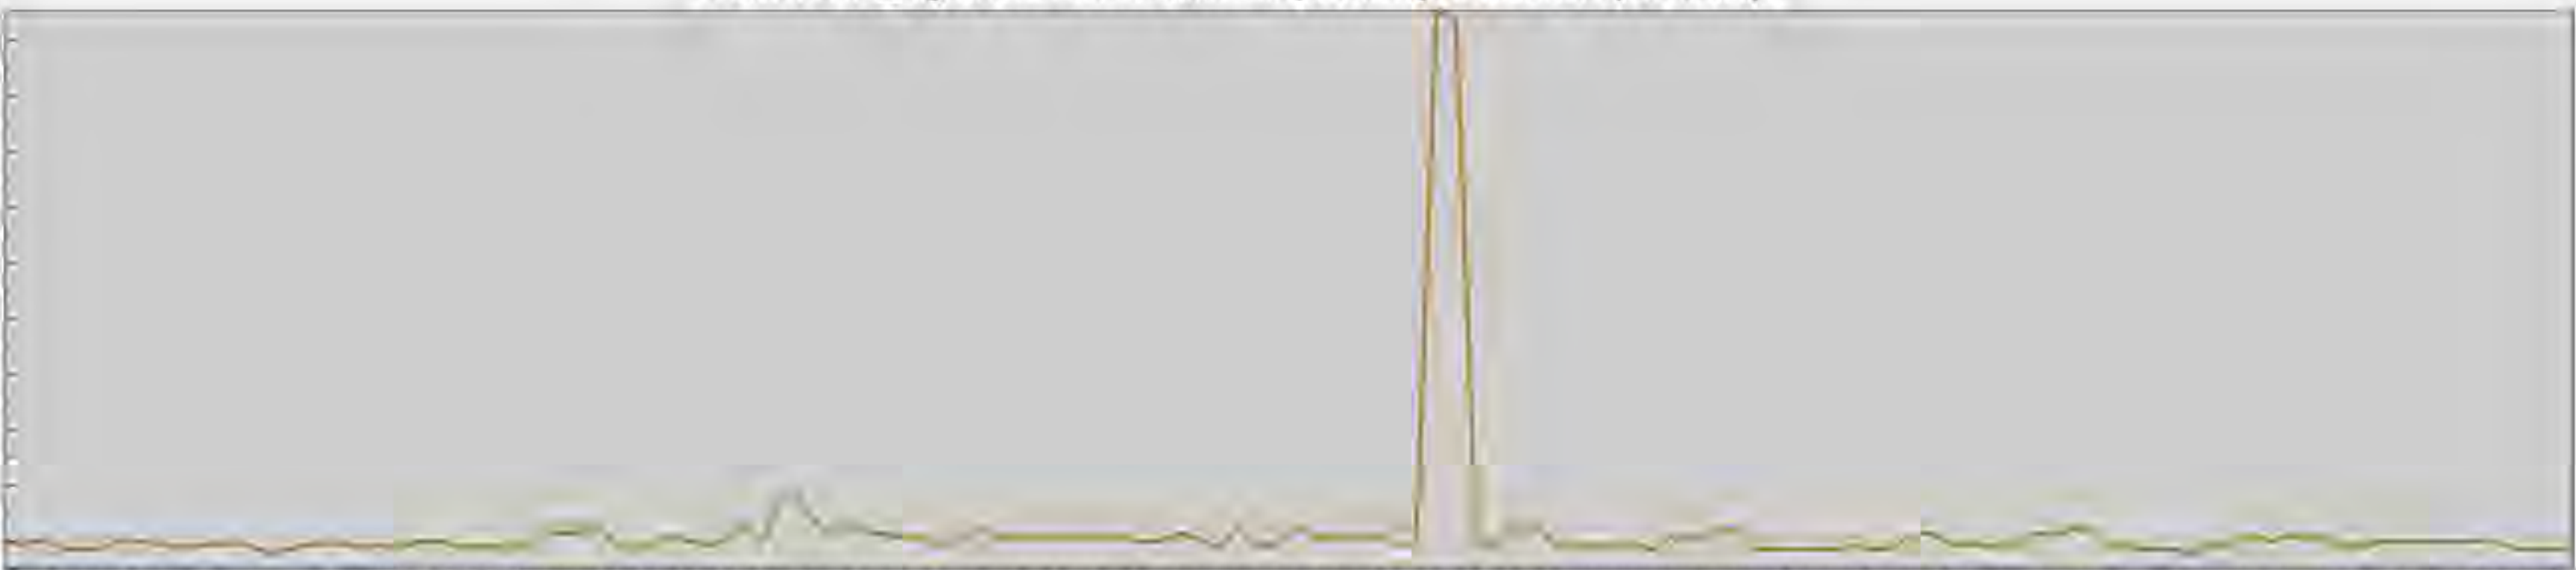

01-PP-M-cells\_GSM190789.CEL  
 02-PP-M-cells\_GSM190790.CEL  
 03-PP-M-cells\_GSM190791.CEL  
 04-CT-V-M-cells\_GSM190792.CEL  
 05-CT-V-M-cells\_GSM190793.CEL  
 06-CT-V-M-cells\_GSM190794.CEL  
 07-Ileum-IEC\_GSM190795.CEL  
 08-Ileum-IEC\_GSM190796.CEL  
 09-Ileum-IEC\_GSM190797.CEL  
 10-FAE-RMPYEP001001.CEL  
 11-FAE-RMPYEP002001.CEL  
 12-Small-intestine-epithelium\_RMINEP001001.CEL  
 13-Small-intestine-epithelium\_RMINEP002001.CEL  
 14-Ileum-IEC\_GSM350371.CEL  
 15-Ileum-IEC\_GSM350375.CEL  
 16-Colon-IEC-Gf\_GSM349880.CEL  
 17-Colon-VIII\_GSM480362.CEL  
 18-Colon-VIII\_GSM480363.CEL  
 19-Colon-VIII\_GSM480364.CEL  
 20-Colon-Crypt\_GSM480374.CEL  
 21-Colon-Crypt\_GSM480375.CEL  
 22-Paneth-cells\_GSM318590.CEL  
 23-Paneth-cells\_GSM318589.CEL  
 24-Paneth-cells\_GSM116359.CEL  
 25-Paneth-cells\_GSM116350.CEL  
 26-Paneth-cells-Gf-1\_GSM116357.CEL  
 27-Paneth-cells-Gf-1\_GSM116358.CEL  
 28-Paneth-cells-Gf-1\_GSM116359.CEL  
 29-Bone marrow\_GSM258627.CEL  
 30-HSC\_GSM258770.CEL  
 31-HSC\_GSM258771.CEL  
 32-MEP\_GSM258772.CEL  
 33-MEP\_GSM258773.CEL  
 34-MEP\_GSM258774.CEL  
 35-MEP\_GSM258775.CEL  
 36-MEP\_GSM258776.CEL  
 37-MEP\_GSM258777.CEL  
 38-MEP\_GSM258778.CEL  
 39-Granulocytes\_GSM258779.CEL  
 40-Mast-cells\_GSM258780.CEL  
 41-Mast-cells-Gf\_GSM258781.CEL  
 42-Mast-cells-Gf\_GSM258782.CEL  
 43-Mast-cells-Gf\_GSM258783.CEL  
 44-Mast-cells-Gf\_GSM258784.CEL  
 45-Mast-cells-Gf\_GSM258785.CEL  
 46-NK-cells\_GSM258786.CEL  
 47-NK-cells\_GSM258787.CEL  
 48-CD8a+DC\_GSM258788.CEL  
 49-CD8a+DC\_GSM258789.CEL  
 50-CD8a+DC\_GSM258790.CEL  
 51-CD8a+DC\_GSM258791.CEL  
 52-CD8a+DC\_GSM258792.CEL  
 53-CD8a+DC\_GSM258793.CEL  
 54-CD8a+DC\_GSM258794.CEL  
 55-CD8a+DC\_GSM258795.CEL  
 56-CD8a+DC\_GSM258796.CEL  
 57-CD8a+DC\_GSM258797.CEL  
 58-CD8a+DC\_GSM258798.CEL  
 59-CD8a+DC\_GSM258799.CEL  
 60-CD8a+DC\_GSM258800.CEL  
 61-CD8a+DC\_GSM258801.CEL  
 62-Microglia\_GSM258802.CEL  
 63-Microglia\_GSM258803.CEL  
 64-Microglia\_GSM258804.CEL  
 65-Microglia\_GSM258805.CEL  
 66-Thymocyte-DN\_GSM465595.CEL  
 67-Thymocyte-DN\_GSM465596.CEL  
 68-Osteoclasts\_GSM258743.CEL  
 69-Osteoclasts\_GSM258744.CEL  
 70-Tregs\_GSM258778.CEL  
 71-Tregs\_GSM258779.CEL  
 72-Tregs\_GSM258780.CEL  
 73-Tregs\_GSM258781.CEL  
 74-Tregs\_GSM258782.CEL  
 75-Tregs\_GSM258783.CEL  
 76-Tregs\_GSM258784.CEL  
 77-Tregs\_GSM258785.CEL  
 78-Tregs\_GSM258786.CEL  
 79-Tregs\_GSM258787.CEL  
 80-Tregs\_GSM258788.CEL  
 81-Tregs\_GSM258789.CEL  
 82-Tregs\_GSM258790.CEL  
 83-Tregs\_GSM258791.CEL  
 84-Tregs\_GSM258792.CEL  
 85-Tregs\_GSM258793.CEL  
 86-Tregs\_GSM258794.CEL  
 87-Tregs\_GSM258795.CEL  
 88-Tregs\_GSM258796.CEL  
 89-Tregs\_GSM258797.CEL  
 90-Tregs\_GSM258798.CEL  
 91-Tregs\_GSM258799.CEL  
 92-Tregs\_GSM258800.CEL  
 93-Tregs\_GSM258801.CEL  
 94-Tregs\_GSM258802.CEL  
 95-Tregs\_GSM258803.CEL  
 96-Tregs\_GSM258804.CEL  
 97-Tregs\_GSM258805.CEL  
 98-Tregs\_GSM258806.CEL  
 99-Tregs\_GSM258807.CEL  
 100-Tregs\_GSM258808.CEL  
 101-Tregs\_GSM258809.CEL  
 102-Tregs\_GSM258810.CEL  
 103-Tregs\_GSM258811.CEL  
 104-Tregs\_GSM258812.CEL  
 105-Tregs\_GSM258813.CEL  
 106-Tregs\_GSM258814.CEL  
 107-Tregs\_GSM258815.CEL  
 108-Tregs\_GSM258816.CEL  
 109-Tregs\_GSM258817.CEL  
 110-Tregs\_GSM258818.CEL  
 111-Tregs\_GSM258819.CEL  
 112-Tregs\_GSM258820.CEL  
 113-Tregs\_GSM258821.CEL  
 114-Tregs\_GSM258822.CEL  
 115-Tregs\_GSM258823.CEL  
 116-Tregs\_GSM258824.CEL  
 117-Tregs\_GSM258825.CEL  
 118-Tregs\_GSM258826.CEL  
 119-Tregs\_GSM258827.CEL  
 120-Tregs\_GSM258828.CEL  
 121-Tregs\_GSM258829.CEL  
 122-Tregs\_GSM258830.CEL  
 123-Tregs\_GSM258831.CEL  
 124-Tregs\_GSM258832.CEL  
 125-Tregs\_GSM258833.CEL  
 126-Tregs\_GSM258834.CEL  
 127-Tregs\_GSM258835.CEL  
 128-Tregs\_GSM258836.CEL  
 129-Tregs\_GSM258837.CEL  
 130-Tregs\_GSM258838.CEL  
 131-Tregs\_GSM258839.CEL  
 132-Tregs\_GSM258840.CEL  
 133-Tregs\_GSM258841.CEL  
 134-Tregs\_GSM258842.CEL  
 135-Tregs\_GSM258843.CEL  
 136-Tregs\_GSM258844.CEL  
 137-Tregs\_GSM258845.CEL  
 138-Tregs\_GSM258846.CEL  
 139-Tregs\_GSM258847.CEL  
 140-Tregs\_GSM258848.CEL  
 141-Tregs\_GSM258849.CEL  
 142-Tregs\_GSM258850.CEL  
 143-Tregs\_GSM258851.CEL  
 144-Tregs\_GSM258852.CEL  
 145-Tregs\_GSM258853.CEL  
 146-Tregs\_GSM258854.CEL  
 147-Tregs\_GSM258855.CEL  
 148-Tregs\_GSM258856.CEL  
 149-Tregs\_GSM258857.CEL  
 150-Tregs\_GSM258858.CEL  
 151-Tregs\_GSM258859.CEL  
 152-Tregs\_GSM258860.CEL  
 153-Tregs\_GSM258861.CEL  
 154-Tregs\_GSM258862.CEL  
 155-Tregs\_GSM258863.CEL  
 156-Tregs\_GSM258864.CEL  
 157-Tregs\_GSM258865.CEL  
 158-Tregs\_GSM258866.CEL  
 159-Tregs\_GSM258867.CEL  
 160-Tregs\_GSM258868.CEL  
 161-Tregs\_GSM258869.CEL  
 162-Tregs\_GSM258870.CEL  
 163-Tregs\_GSM258871.CEL  
 164-Tregs\_GSM258872.CEL  
 165-Tregs\_GSM258873.CEL  
 166-Tregs\_GSM258874.CEL  
 167-Tregs\_GSM258875.CEL  
 168-Tregs\_GSM258876.CEL  
 169-Tregs\_GSM258877.CEL  
 170-Tregs\_GSM258878.CEL  
 171-Tregs\_GSM258879.CEL  
 172-Tregs\_GSM258880.CEL  
 173-Tregs\_GSM258881.CEL  
 174-Tregs\_GSM258882.CEL  
 175-Tregs\_GSM258883.CEL  
 176-Tregs\_GSM258884.CEL  
 177-Tregs\_GSM258885.CEL  
 178-Tregs\_GSM258886.CEL  
 179-Tregs\_GSM258887.CEL  
 180-Tregs\_GSM258888.CEL  
 181-Tregs\_GSM258889.CEL  
 182-Tregs\_GSM258890.CEL  
 183-Tregs\_GSM258891.CEL  
 184-Tregs\_GSM258892.CEL  
 185-Tregs\_GSM258893.CEL  
 186-Tregs\_GSM258894.CEL  
 187-Tregs\_GSM258895.CEL  
 188-Tregs\_GSM258896.CEL  
 189-Tregs\_GSM258897.CEL  
 190-Tregs\_GSM258898.CEL  
 191-Tregs\_GSM258899.CEL  
 192-Tregs\_GSM258900.CEL  
 193-Tregs\_GSM258901.CEL  
 194-Tregs\_GSM258902.CEL  
 195-Tregs\_GSM258903.CEL  
 196-Tregs\_GSM258904.CEL  
 197-Tregs\_GSM258905.CEL  
 198-Tregs\_GSM258906.CEL  
 199-Tregs\_GSM258907.CEL  
 200-Tregs\_GSM258908.CEL



Cluster0042\_NK cell-related (57 nodes)

3,637.6  
3,351.4  
3,165.2  
2,979  
2,792.6  
2,606.7  
2,420.5  
2,234.3  
2,048.1  
1,861.9  
1,675.7  
1,489.5  
1,303.3  
1,117.1  
930.9  
744.8  
558.6  
372.4  
186.2  
0

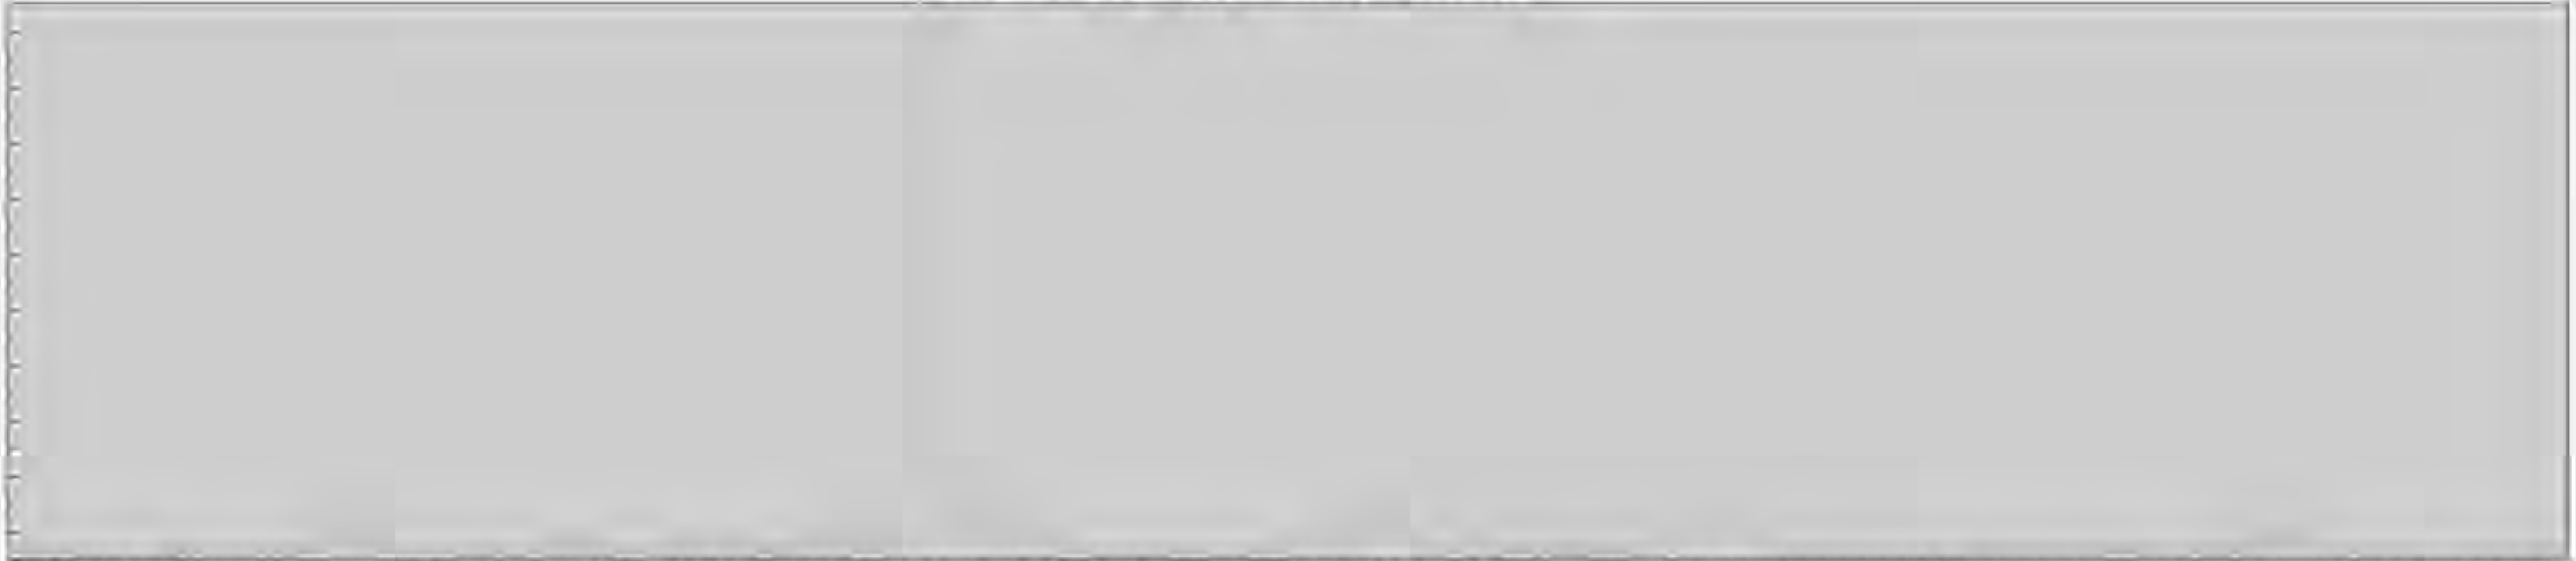

|     |                            |              |     |
|-----|----------------------------|--------------|-----|
| 30  | NALT                       | GSM2899411   | CEL |
| 29  | NALT                       | GSM2899410   | CEL |
| 28  | NALT                       | GSM2899409   | CEL |
| 27  | NALT                       | GSM2899408   | CEL |
| 26  | Color-d9                   | GSM1988104   | CEL |
| 25  | Color-d9                   | GSM1988103   | CEL |
| 24  | Color-d9                   | GSM1988102   | CEL |
| 23  | Color-d4                   | GSM1988101   | CEL |
| 22  | Color-d4                   | GSM1988100   | CEL |
| 21  | Intestine-large            | GSM258676    | CEL |
| 20  | Intestine-large            | GSM258675    | CEL |
| 19  | Intestine-small            | GSM258674    | CEL |
| 18  | Intestine-small            | GSM258673    | CEL |
| 17  | Lymph-nodes                | GSM258672    | CEL |
| 16  | Spleen                     | GSM258671    | CEL |
| 15  | Spleen                     | GSM258670    | CEL |
| 14  | Neuro2a                    | GSM258669    | CEL |
| 13  | Neuro2a                    | GSM258668    | CEL |
| 12  | Astrocytes                 | GSM2418998   | CEL |
| 11  | ming                       | GSM258667    | CEL |
| 10  | ming                       | GSM258666    | CEL |
| 09  | ming                       | GSM258665    | CEL |
| 08  | MIMCD3                     | GSM258664    | CEL |
| 07  | MIMCD3                     | GSM258663    | CEL |
| 06  | Bruce4                     | GSM258662    | CEL |
| 05  | Bruce4                     | GSM258661    | CEL |
| 04  | C2C12                      | GSM258660    | CEL |
| 03  | C2C12                      | GSM258659    | CEL |
| 02  | NH3T3                      | GSM258658    | CEL |
| 01  | NH3T3                      | GSM258657    | CEL |
| 100 | 3T3-L1                     | GSM258656    | CEL |
| 99  | 3T3-L1                     | GSM258655    | CEL |
| 98  | 10T12                      | GSM258654    | CEL |
| 97  | 10T12                      | GSM258653    | CEL |
| 96  | Osteoblast-d21             | GSM258652    | CEL |
| 95  | Osteoblast-d14             | GSM258651    | CEL |
| 94  | Osteoblast-d14             | GSM258650    | CEL |
| 93  | Osteoblast-d5              | GSM258649    | CEL |
| 92  | Osteoblast-d5              | GSM258648    | CEL |
| 91  | Chondrocytes               | GSM258647    | CEL |
| 90  | Chondrocytes               | GSM258646    | CEL |
| 89  | Nat Helper cell            | GSM465594    | CEL |
| 88  | Nat Helper cell            | GSM465593    | CEL |
| 87  | LT cell                    | GSM465592    | CEL |
| 86  | MS-1                       | GSM234692    | CEL |
| 85  | Lymph-endo-cells           | GSM143704    | CEL |
| 84  | PP-FDC                     | GSM481977    | CEL |
| 83  | PP-FDC                     | GSM481978    | CEL |
| 82  | PP-FDC                     | GSM481979    | CEL |
| 81  | PP-FDC                     | GSM481976    | CEL |
| 80  | E-L                        | RMLNDC003001 | CEL |
| 79  | E-L                        | RMLNDC003001 | CEL |
| 78  | Follicular-B-cells         | GSM258654    | CEL |
| 77  | Follicular-B-cells         | GSM258653    | CEL |
| 76  | MZ-Bcell                   | GSM258652    | CEL |
| 75  | MZ-Bcell                   | GSM258651    | CEL |
| 74  | BAF3                       | GSM258650    | CEL |
| 73  | BAF3                       | GSM258649    | CEL |
| 72  | Tregs                      | GSM258648    | CEL |
| 71  | T-cells-CD8+               | GSM258647    | CEL |
| 70  | T-cells-CD8+               | GSM258646    | CEL |
| 69  | T-cells-CD4+               | GSM258645    | CEL |
| 68  | T-cells-CD4+               | GSM258644    | CEL |
| 67  | T-cells-CD4+               | GSM258643    | CEL |
| 66  | Thymocyte-DN               | GSM465595    | CEL |
| 65  | Osteoclasts                | GSM258642    | CEL |
| 64  | Microglia                  | GSM258641    | CEL |
| 63  | Microglia                  | GSM258640    | CEL |
| 62  | Microglia                  | GSM258639    | CEL |
| 61  | MM-LPS-7h                  | GSM258638    | CEL |
| 60  | MM-LPS-7h                  | GSM258637    | CEL |
| 59  | MM-LPS-6h                  | GSM258636    | CEL |
| 58  | MM-LPS-6h                  | GSM258635    | CEL |
| 57  | MM-LPS-6h                  | GSM258634    | CEL |
| 56  | MM-LPS-6h                  | GSM258633    | CEL |
| 55  | MM-LPS-6h                  | GSM258632    | CEL |
| 54  | MM-LPS-6h                  | GSM258631    | CEL |
| 53  | MM-LPS-6h                  | GSM258630    | CEL |
| 52  | MM-LPS-6h                  | GSM258629    | CEL |
| 51  | MM-LPS-6h                  | GSM258628    | CEL |
| 50  | CD8a-DC                    | GSM258627    | CEL |
| 49  | CD8a-DC                    | GSM258626    | CEL |
| 48  | CD8a+DC                    | GSM258625    | CEL |
| 47  | NK-cells                   | GSM258624    | CEL |
| 46  | NK-cells                   | GSM258623    | CEL |
| 45  | Mast-cells-IgE+Ad          | GSM258622    | CEL |
| 44  | Mast-cells-IgE+Ad          | GSM258621    | CEL |
| 43  | Mast-cells-IgE             | GSM258620    | CEL |
| 42  | Mast-cells-IgE             | GSM258619    | CEL |
| 41  | Mast-cells                 | GSM258618    | CEL |
| 40  | Granulocytes               | GSM258617    | CEL |
| 39  | Granulocytes               | GSM258616    | CEL |
| 38  | GMP                        | GSM258615    | CEL |
| 37  | GMP                        | GSM258614    | CEL |
| 36  | GMP                        | GSM258613    | CEL |
| 35  | GMP                        | GSM258612    | CEL |
| 34  | GMP                        | GSM258611    | CEL |
| 33  | GMP                        | GSM258610    | CEL |
| 32  | MEP                        | GSM258609    | CEL |
| 31  | MEP                        | GSM258608    | CEL |
| 30  | MEP                        | GSM258607    | CEL |
| 29  | MEP                        | GSM258606    | CEL |
| 28  | Bone marrow                | GSM258605    | CEL |
| 27  | paneth-cells-GE            | GSM116357    | CEL |
| 26  | paneth-cells-GE            | GSM116356    | CEL |
| 25  | paneth-cells               | GSM116355    | CEL |
| 24  | paneth-cells               | GSM116354    | CEL |
| 23  | paneth-cells               | GSM318589    | CEL |
| 22  | paneth-cells               | GSM318590    | CEL |
| 21  | Colon-Crypt                | GSM480375    | CEL |
| 20  | Colon-Crypt                | GSM480374    | CEL |
| 19  | Colon-Vill                 | GSM480363    | CEL |
| 18  | Colon-Vill                 | GSM480362    | CEL |
| 17  | Colon-IEC-Gf               | GSM349880    | CEL |
| 16  | Colon-IEC-Gf               | GSM350375    | CEL |
| 15  | ileum-IEC                  | GSM350376    | CEL |
| 14  | ileum-IEC                  | GSM350377    | CEL |
| 13  | Small-intestine-epithelium | RMINEP002001 | CEL |
| 12  | Small-intestine-epithelium | RMINEP001001 | CEL |
| 11  | FAE                        | RMPYEP001001 | CEL |
| 10  | FAE                        | RMPYEP001001 | CEL |
| 09  | ileum-IEC                  | GSM190797    | CEL |
| 08  | ileum-IEC                  | GSM190796    | CEL |
| 07  | ileum-IEC                  | GSM190795    | CEL |
| 06  | CT-v-M-cells               | GSM190794    | CEL |
| 05  | CT-v-M-cells               | GSM190793    | CEL |
| 04  | CT-v-M-cells               | GSM190792    | CEL |
| 03  | PP-M-cells                 | GSM190791    | CEL |
| 02  | PP-M-cells                 | GSM190790    | CEL |
| 01  | PP-M-cells                 | GSM190789    | CEL |



Cluster0043\_Granulocyte-related (57 nodes)

745.8  
706.6  
667.3  
628.1  
588.8  
549.6  
510.3  
471.1  
431.8  
392.5  
353.3  
314  
274.8  
235.5  
196.3  
157  
117.8  
78.5  
39.3  
0

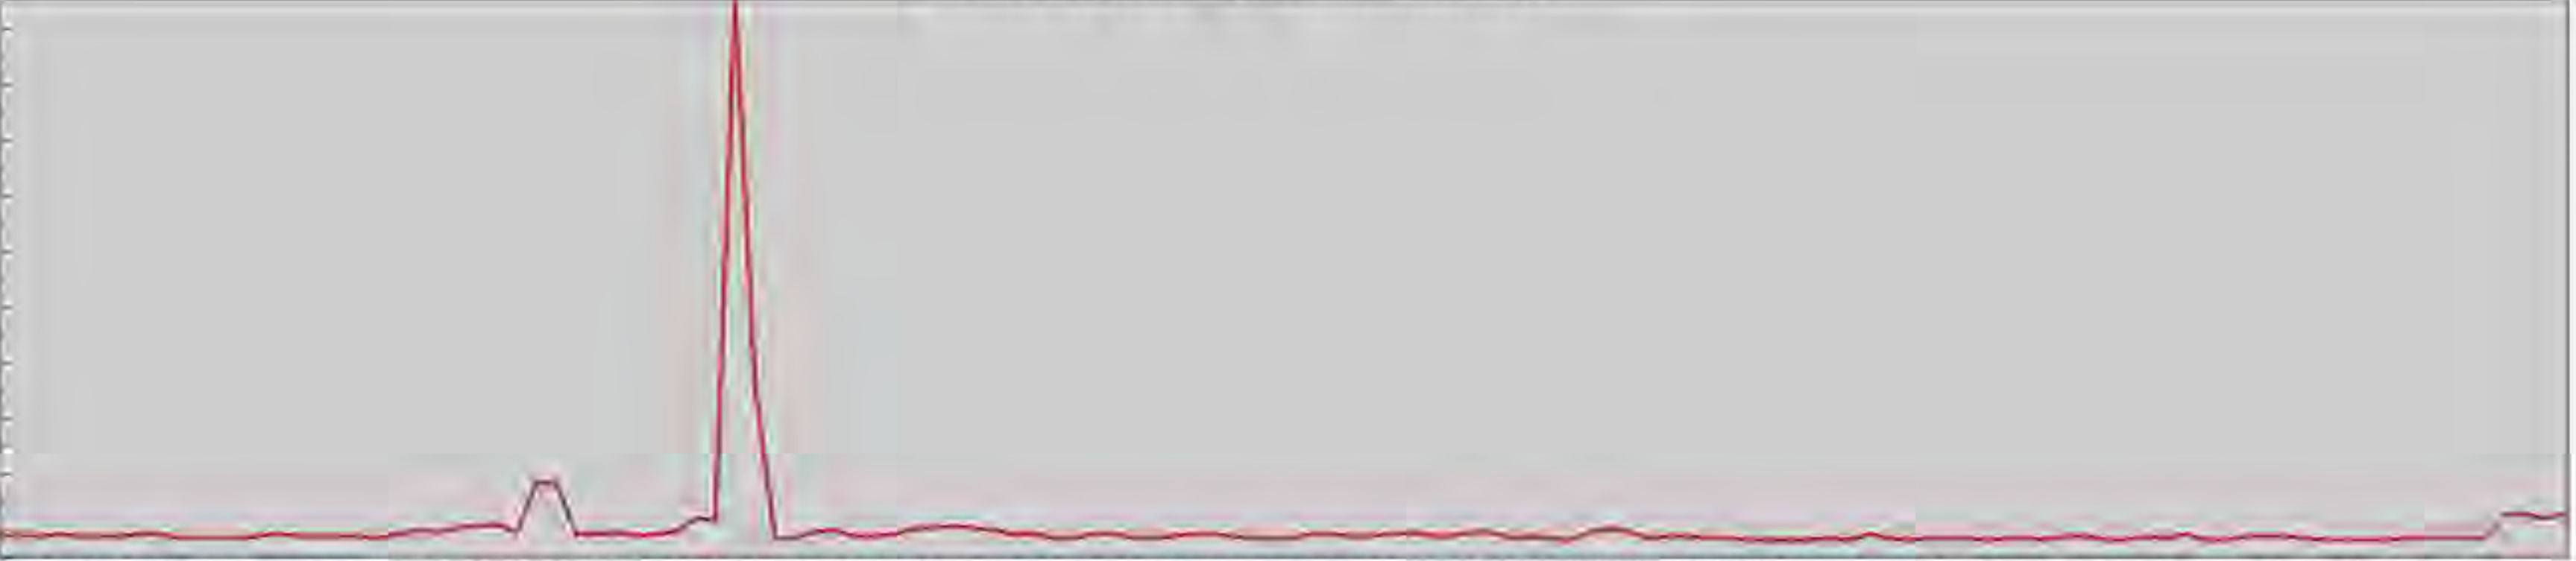

01-PP-M-cells\_GSM190789.CEL  
 02-PP-M-cells\_GSM190790.CEL  
 03-PP-M-cells\_GSM190791.CEL  
 04-CT-Y-M-cells\_GSM190792.CEL  
 05-CT-Y-M-cells\_GSM190793.CEL  
 06-CT-W-M-cells\_GSM190794.CEL  
 07-Ileum-IEC\_GSM190795.CEL  
 08-Ileum-IEC\_GSM190796.CEL  
 09-Ileum-RMPYEP001001.CEL  
 10-FAE-RMPYEP001001.CEL  
 11-FAE-RMPYEP002001.CEL  
 12-Small-intestine-epithelium\_RMINEP001001.CEL  
 13-Small-intestine-epithelium\_RMINEP002001.CEL  
 14-Ileum-IEC\_GSM350371.CEL  
 15-Ileum-IEC\_GSM350375.CEL  
 16-Colon-IEC-Gf\_GSM349880.CEL  
 17-Colon-VIII\_GSM480362.CEL  
 18-Colon-VIII\_GSM480363.CEL  
 19-Colon-VIII\_GSM480364.CEL  
 20-Colon-Crypt\_GSM480374.CEL  
 21-Colon-Crypt\_GSM480375.CEL  
 22-Paneth-cells\_GSM318590.CEL  
 23-Paneth-cells\_GSM318589.CEL  
 24-Paneth-cells\_GSM116359.CEL  
 25-Paneth-cells\_GSM116350.CEL  
 26-Paneth-cells-Gf-1\_GSM116357.CEL  
 27-Paneth-cells-Gf-1\_GSM116358.CEL  
 28-Paneth-cells-Gf-1\_GSM116357.CEL  
 29-Bone marrow\_GSM258627.CEL  
 30-NALT\_GSM289411.CEL  
 31-NALT\_GSM289410.CEL  
 32-NALT\_GSM289409.CEL  
 33-NALT\_GSM289408.CEL  
 34-Colon-d9\_GSM1988105.CEL  
 35-Colon-d9\_GSM1988104.CEL  
 36-Colon-d9\_GSM1988103.CEL  
 37-Colon-d4\_GSM1988102.CEL  
 38-Colon-d4\_GSM1988101.CEL  
 39-Intestine-large\_GSM258676.CEL  
 40-Intestine-large\_GSM258675.CEL  
 41-Intestine-small\_GSM258678.CEL  
 42-Intestine-small\_GSM258677.CEL  
 43-Lymph-nodes\_GSM258691.CEL  
 44-Spleen\_GSM258767.CEL  
 45-Spleen\_GSM258767.CEL  
 46-Spleen\_GSM258767.CEL  
 47-Neuro2a\_GSM241898.CEL  
 48-Neuro2a\_GSM241898.CEL  
 49-Astrocytes\_GSM241898.CEL  
 50-mim6\_GSM258726.CEL  
 51-mim6\_GSM258726.CEL  
 52-mim6\_GSM258726.CEL  
 53-MIMCD3\_GSM258724.CEL  
 54-MIMCD3\_GSM258724.CEL  
 55-MIMCD3\_GSM258724.CEL  
 56-Bruce4\_GSM258690.CEL  
 57-Bruce4\_GSM258690.CEL  
 58-C2C12\_GSM258629.CEL  
 59-NH3T3\_GSM258730.CEL  
 60-NH3T3\_GSM258730.CEL  
 61-3T3-L1\_GSM258610.CEL  
 62-3T3-L1\_GSM258610.CEL  
 63-3T3-L1\_GSM258610.CEL  
 64-10T12\_GSM258631.CEL  
 65-10T12\_GSM258631.CEL  
 66-Osteoblast-d21\_GSM258740.CEL  
 67-Osteoblast-d21\_GSM258739.CEL  
 68-Osteoblast-d14\_GSM258738.CEL  
 69-Osteoblast-d14\_GSM258737.CEL  
 70-Osteoblast-d5\_GSM258742.CEL  
 71-Osteoblast-d5\_GSM258741.CEL  
 72-Chondrocytes\_GSM258741.CEL  
 73-Chondrocytes\_GSM258740.CEL  
 74-Nat Helper cell\_GSM465594.CEL  
 75-Nat Helper cell\_GSM465593.CEL  
 76-TT cell\_GSM465596.CEL  
 77-MS-1\_GSM234692.CEL  
 78-Lymph-endo-cells\_GSM143704.CEL  
 79-P-FDC\_GSM481977.CEL  
 80-P-FDC\_GSM481978.CEL  
 81-P-FDC\_GSM481976.CEL  
 82-F-L-Y-RMLNDC003001.CEL  
 83-F-L-Y-RMLNDC003001.CEL  
 84-F-L-Y-RMLNDC003001.CEL  
 85-Follicular-B-cells\_GSM258664.CEL  
 86-Follicular-B-cells\_GSM258663.CEL  
 87-MZ-Bcell\_GSM258627.CEL  
 88-MZ-Bcell\_GSM258627.CEL  
 89-BAF3\_GSM258620.CEL  
 90-BAF3\_GSM258619.CEL  
 91-Tregs\_GSM258778.CEL  
 92-Tregs\_GSM258778.CEL  
 93-T-cells-CD8+GSM258776.CEL  
 94-T-cells-CD8+GSM258775.CEL  
 95-T-cells-CD4+GSM258774.CEL  
 96-T-cells-CD4+GSM258773.CEL  
 97-Thymocyte-DN\_GSM465595.CEL  
 98-Osteoclasts\_GSM258743.CEL  
 99-Microglia\_GSM258721.CEL  
 100-MM-PS-7H\_GSM258706.CEL  
 101-MM-PS-7H\_GSM258706.CEL  
 102-MM-PS-6h\_GSM258700.CEL  
 103-MM-PS-6h\_GSM258699.CEL  
 104-MM-LPS-6h\_GSM258699.CEL  
 105-MM-LPS-6h\_GSM258699.CEL  
 106-MM-LPS-6h\_GSM258699.CEL  
 107-MM-LPS-6h\_GSM258699.CEL  
 108-MM-LPS-6h\_GSM258699.CEL  
 109-MM-LPS-6h\_GSM258699.CEL  
 110-MM-LPS-6h\_GSM258699.CEL  
 111-MM-LPS-6h\_GSM258699.CEL  
 112-MM-LPS-6h\_GSM258699.CEL  
 113-MM-LPS-6h\_GSM258699.CEL  
 114-MM-LPS-6h\_GSM258699.CEL  
 115-MM-LPS-6h\_GSM258699.CEL  
 116-MM-LPS-6h\_GSM258699.CEL  
 117-MM-LPS-6h\_GSM258699.CEL  
 118-MM-LPS-6h\_GSM258699.CEL  
 119-MM-LPS-6h\_GSM258699.CEL  
 120-MM-LPS-6h\_GSM258699.CEL  
 121-MM-LPS-6h\_GSM258699.CEL  
 122-MM-LPS-6h\_GSM258699.CEL  
 123-MM-LPS-6h\_GSM258699.CEL  
 124-MM-LPS-6h\_GSM258699.CEL  
 125-MM-LPS-6h\_GSM258699.CEL  
 126-MM-LPS-6h\_GSM258699.CEL  
 127-MM-LPS-6h\_GSM258699.CEL  
 128-MM-LPS-6h\_GSM258699.CEL  
 129-MM-LPS-6h\_GSM258699.CEL  
 130-MM-LPS-6h\_GSM258699.CEL  
 131-MM-LPS-6h\_GSM258699.CEL  
 132-MM-LPS-6h\_GSM258699.CEL  
 133-MM-LPS-6h\_GSM258699.CEL  
 134-MM-LPS-6h\_GSM258699.CEL  
 135-MM-LPS-6h\_GSM258699.CEL  
 136-MM-LPS-6h\_GSM258699.CEL  
 137-MM-LPS-6h\_GSM258699.CEL  
 138-MM-LPS-6h\_GSM258699.CEL  
 139-MM-LPS-6h\_GSM258699.CEL  
 140-MM-LPS-6h\_GSM258699.CEL  
 141-MM-LPS-6h\_GSM258699.CEL  
 142-MM-LPS-6h\_GSM258699.CEL  
 143-MM-LPS-6h\_GSM258699.CEL  
 144-MM-LPS-6h\_GSM258699.CEL  
 145-MM-LPS-6h\_GSM258699.CEL  
 146-MM-LPS-6h\_GSM258699.CEL  
 147-MM-LPS-6h\_GSM258699.CEL  
 148-MM-LPS-6h\_GSM258699.CEL  
 149-MM-LPS-6h\_GSM258699.CEL  
 150-MM-LPS-6h\_GSM258699.CEL  
 151-MM-LPS-6h\_GSM258699.CEL  
 152-MM-LPS-6h\_GSM258699.CEL  
 153-MM-LPS-6h\_GSM258699.CEL  
 154-MM-LPS-6h\_GSM258699.CEL  
 155-MM-LPS-6h\_GSM258699.CEL  
 156-MM-LPS-6h\_GSM258699.CEL  
 157-MM-LPS-6h\_GSM258699.CEL  
 158-MM-LPS-6h\_GSM258699.CEL  
 159-MM-LPS-6h\_GSM258699.CEL  
 160-MM-LPS-6h\_GSM258699.CEL  
 161-MM-LPS-6h\_GSM258699.CEL  
 162-MM-LPS-6h\_GSM258699.CEL  
 163-MM-LPS-6h\_GSM258699.CEL  
 164-MM-LPS-6h\_GSM258699.CEL  
 165-MM-LPS-6h\_GSM258699.CEL  
 166-MM-LPS-6h\_GSM258699.CEL  
 167-MM-LPS-6h\_GSM258699.CEL  
 168-MM-LPS-6h\_GSM258699.CEL  
 169-MM-LPS-6h\_GSM258699.CEL  
 170-MM-LPS-6h\_GSM258699.CEL  
 171-MM-LPS-6h\_GSM258699.CEL  
 172-MM-LPS-6h\_GSM258699.CEL  
 173-MM-LPS-6h\_GSM258699.CEL  
 174-MM-LPS-6h\_GSM258699.CEL  
 175-MM-LPS-6h\_GSM258699.CEL  
 176-MM-LPS-6h\_GSM258699.CEL  
 177-MM-LPS-6h\_GSM258699.CEL  
 178-MM-LPS-6h\_GSM258699.CEL  
 179-MM-LPS-6h\_GSM258699.CEL  
 180-MM-LPS-6h\_GSM258699.CEL  
 181-MM-LPS-6h\_GSM258699.CEL  
 182-MM-LPS-6h\_GSM258699.CEL  
 183-MM-LPS-6h\_GSM258699.CEL  
 184-MM-LPS-6h\_GSM258699.CEL  
 185-MM-LPS-6h\_GSM258699.CEL  
 186-MM-LPS-6h\_GSM258699.CEL  
 187-MM-LPS-6h\_GSM258699.CEL  
 188-MM-LPS-6h\_GSM258699.CEL  
 189-MM-LPS-6h\_GSM258699.CEL  
 190-MM-LPS-6h\_GSM258699.CEL  
 191-MM-LPS-6h\_GSM258699.CEL  
 192-MM-LPS-6h\_GSM258699.CEL  
 193-MM-LPS-6h\_GSM258699.CEL  
 194-MM-LPS-6h\_GSM258699.CEL  
 195-MM-LPS-6h\_GSM258699.CEL  
 196-MM-LPS-6h\_GSM258699.CEL  
 197-MM-LPS-6h\_GSM258699.CEL  
 198-MM-LPS-6h\_GSM258699.CEL  
 199-MM-LPS-6h\_GSM258699.CEL  
 200-MM-LPS-6h\_GSM258699.CEL



Cluster0044\_Low in many (55 nodes)

109.5  
103.7  
98  
92.2  
86.4  
80.7  
74.9  
69.2  
63.4  
57.6  
51.9  
46.1  
40.3  
34.6  
28.8  
23.1  
17.3  
11.5  
5.8  
0

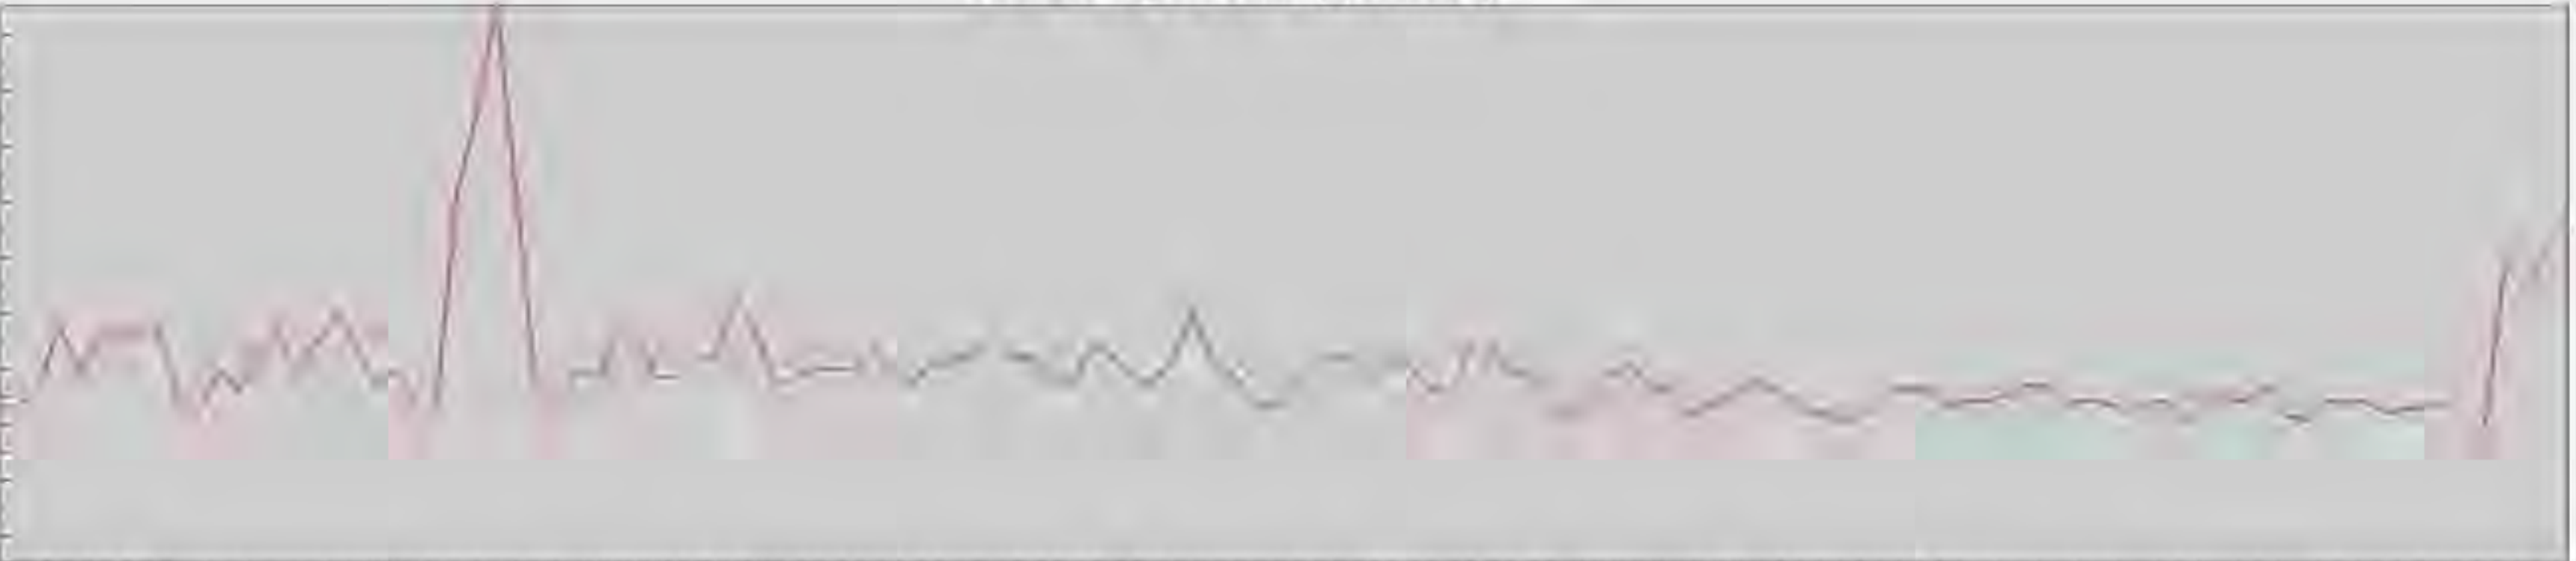

130-NALT GSM289411 CEL  
129-NALT GSM289410 CEL  
128-NALT GSM289409 CEL  
127-NALT GSM289408 CEL  
126-Colon-d9 GSM1988105 CEL  
125-Colon-d9 GSM1988104 CEL  
124-Colon-d9 GSM1988103 CEL  
123-Colon-d4 GSM1988102 CEL  
122-Colon-d4 GSM1988101 CEL  
121-Intestine-large GSM258676 CEL  
120-Intestine-large GSM258675 CEL  
119-Intestine-small GSM258678 CEL  
118-Intestine-small GSM258679 CEL  
117-Lymph-nodes GSM258691 CEL  
116-Lymph-nodes GSM258726 CEL  
115-Spleen GSM258767 CEL  
114-Spleen GSM258767 CEL  
113-Neuro2a GSM258728 CEL  
112-Neuro2a GSM258727 CEL  
111-Astrocytes GSM241898 CEL  
110-mimb GSM258726 CEL  
109-mimb GSM258725 CEL  
108-MIMCD3 GSM258724 CEL  
107-MIMCD3 GSM258723 CEL  
106-Bruce4 GSM258656 CEL  
105-Bruce4 GSM258656 CEL  
104-C2C12 GSM258690 CEL  
103-C2C12 GSM258629 CEL  
102-NH3T3 GSM258739 CEL  
101-NH3T3 GSM258739 CEL  
100-3T3-L1 GSM258610 CEL  
99-3T3-L1 GSM258609 CEL  
98-10T12 GSM258632 CEL  
97-10T12 GSM258631 CEL  
96-Osteoblast-d21 GSM258740 CEL  
95-Osteoblast-d21 GSM258739 CEL  
94-Osteoblast-d14 GSM258738 CEL  
93-Osteoblast-d14 GSM258737 CEL  
92-Osteoblast-d5 GSM258742 CEL  
91-Osteoblast-d5 GSM258741 CEL  
90-Chondrocytes GSM266741 CEL  
89-Chondrocytes GSM266740 CEL  
88-Nat Helper cell GSM465594 CEL  
87-Nat Helper cell GSM465593 CEL  
86-TT cell GSM465596 CEL  
85-MS-1 GSM234692 CEL  
84-Lymph-endo-cells GSM143704 CEL  
83-PP-FDC GSM481977 CEL  
82-PP-FDC GSM481978 CEL  
81-PP-FDC GSM481976 CEL  
80-L-Y RMLNDC003001 CEL  
79-L-Y RMLNDC003001 CEL  
78-Follicular-Bcells GSM258664 CEL  
77-Follicular-Bcells GSM258663 CEL  
76-MZ-Bcell GSM258622 CEL  
75-MZ-Bcell GSM258621 CEL  
74-BAF3 GSM258620 CEL  
73-BAF3 GSM258619 CEL  
72-Tregs GSM258778 CEL  
71-Tregs GSM258777 CEL  
70-T-cells-CD8+ GSM258776 CEL  
69-T-cells-CD8+ GSM258774 CEL  
68-T-cells-CD4+ GSM258773 CEL  
67-T-cells-CD4+ GSM258773 CEL  
66-Thymocyte-DN GSM465595 CEL  
65-Osteoclasts GSM258743 CEL  
64-Microglia GSM258721 CEL  
63-Microglia GSM258721 CEL  
62-MM-LPS-7h GSM268706 CEL  
61-MM-LPS-7h GSM268706 CEL  
60-MM-LPS-6h GSM258702 CEL  
59-MM-LPS-6h GSM258702 CEL  
58-MM-LPS-6h GSM258699 CEL  
57-MM-LPS-6h GSM258699 CEL  
56-MM-LPS-6h GSM258694 CEL  
55-MM-LPS-6h GSM258694 CEL  
54-Plasmacytoid-DC GSM258650 CEL  
53-Plasmacytoid-DC GSM258649 CEL  
52-CD8a-DC GSM258647 CEL  
51-CD8a-DC GSM258647 CEL  
50-CD8a+DC GSM258646 CEL  
49-CD8a+DC GSM258646 CEL  
48-NK-cells GSM258732 CEL  
47-NK-cells GSM258731 CEL  
46-Mast-cells-IgE+Ad GSM258719 CEL  
45-Mast-cells-IgE+Ad GSM258717 CEL  
44-Mast-cells-IgE GSM258714 CEL  
43-Mast-cells-IgE GSM258713 CEL  
42-Mast-cells-IgE GSM258712 CEL  
41-Mast-cells-IgE GSM258712 CEL  
40-Granulocytes GSM258668 CEL  
39-Granulocytes GSM258667 CEL  
38-GMP GSM258666 CEL  
37-GMP GSM258666 CEL  
36-GMP GSM258666 CEL  
35-GMP GSM258666 CEL  
34-MEP GSM258642 CEL  
33-MEP GSM258642 CEL  
32-MEP GSM258720 CEL  
31-MEP GSM258720 CEL  
30-HSC GSM258770 CEL  
29-Bone marrow GSM258628 CEL  
28-Bone marrow GSM258627 CEL  
27-paneth-cells-GF-1 GSM116357 CEL  
26-paneth-cells-GF-1 GSM116357 CEL  
25-paneth-cells-GF-1 GSM116357 CEL  
24-paneth-cells-GF-1 GSM116359 CEL  
23-paneth-cells-GF-1 GSM116359 CEL  
22-paneth-cells-GF-1 GSM116359 CEL  
21-Colon-Crypt GSM480375 cel  
20-Colon-Crypt GSM480374 cel  
19-Colon-Vill GSM480363 cel  
18-Colon-Vill GSM480362 cel  
17-Colon-IEC-GF GSM349880 CEL  
16-Colon-IEC-GF GSM350375 CEL  
15-Ileum-IEC-GF GSM350376 CEL  
14-Ileum-IEC GSM350371 CEL  
13-Small-intestine-epithelium RMINEP002001 CEL  
12-Small-intestine-epithelium RMINEP001001 CEL  
11-FAE-RMPYEP002001 CEL  
10-FAE-RMPYEP001001 CEL  
09-Ileum-IEC GSM190797 CEL  
08-Ileum-IEC GSM190796 CEL  
07-Ileum-IEC GSM190795 CEL  
06-CT-v-M-cells GSM190794 CEL  
05-CT-v-M-cells GSM190793 CEL  
04-CT-v-M-cells GSM190792 CEL  
03-PP-M-cells GSM190791 CEL  
02-PP-M-cells GSM190790 CEL  
01-PP-M-cells GSM190789 CEL



Cluster0045\_Plasmatyoid DC-related (54 nodes)

827.3  
783.8  
740.3  
696.7  
653.2  
609.6  
566.1  
522.5  
479  
435.4  
391.9  
348.4  
304.8  
261.3  
217.7  
174.2  
130.6  
87.1  
43.5  
0

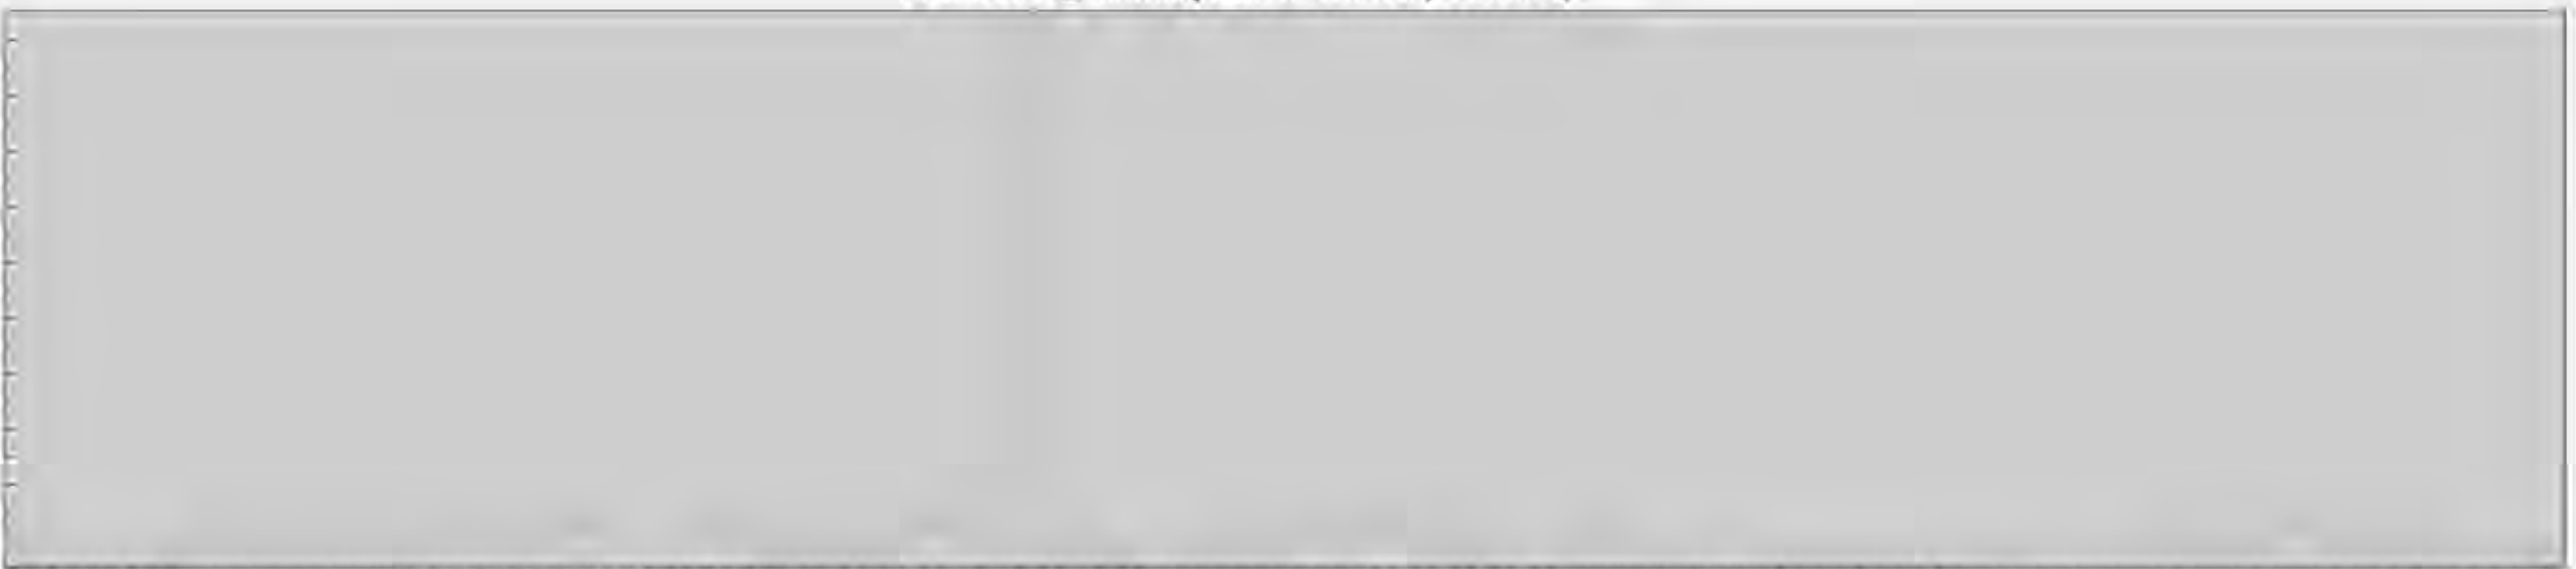

|     |                   |              |      |
|-----|-------------------|--------------|------|
| 30  | NALT              | GSM289411    | CELL |
| 129 | NALT              | GSM289410    | CELL |
| 128 | NALT              | GSM289409    | CELL |
| 127 | NALT              | GSM289408    | CELL |
| 126 | Colon-d9          | GSM1988105   | CELL |
| 125 | Colon-d9          | GSM1988104   | CELL |
| 124 | Colon-d9          | GSM1988103   | CELL |
| 123 | Colon-d4          | GSM1988102   | CELL |
| 122 | Colon-d4          | GSM1988101   | CELL |
| 121 | Intestine-large   | GSM258676    | CELL |
| 120 | Intestine-large   | GSM258675    | CELL |
| 119 | Intestine-small   | GSM258678    | CELL |
| 118 | Intestine-small   | GSM258679    | CELL |
| 117 | Lymph-nodes       | GSM258691    | CELL |
| 116 | Spleen            | GSM258766    | CELL |
| 115 | Spleen            | GSM258767    | CELL |
| 114 | Spleen            | GSM258768    | CELL |
| 113 | Neuro2a           | GSM258728    | CELL |
| 112 | Neuro2a           | GSM258729    | CELL |
| 111 | Astrocytes        | GSM241898    | CELL |
| 110 | mim6              | GSM258726    | CELL |
| 109 | mim6              | GSM258725    | CELL |
| 108 | MIMCD3            | GSM258724    | CELL |
| 107 | MIMCD3            | GSM258723    | CELL |
| 106 | Bruce4            | GSM258656    | CELL |
| 105 | Bruce4            | GSM258655    | CELL |
| 104 | C2C12             | GSM258690    | CELL |
| 103 | C2C12             | GSM258689    | CELL |
| 102 | NH3T3             | GSM258730    | CELL |
| 101 | NH3T3             | GSM258729    | CELL |
| 100 | 3T3-L1            | GSM258610    | CELL |
| 99  | 3T3-L1            | GSM258609    | CELL |
| 98  | 10T12             | GSM258632    | CELL |
| 97  | 10T12             | GSM258631    | CELL |
| 96  | Osteoblast-d21    | GSM258740    | CELL |
| 95  | Osteoblast-d14    | GSM258738    | CELL |
| 94  | Osteoblast-d14    | GSM258737    | CELL |
| 93  | Osteoblast-d5     | GSM258742    | CELL |
| 92  | Osteoblast-d5     | GSM258741    | CELL |
| 91  | Chondrocytes      | GSM266741    | CELL |
| 90  | Chondrocytes      | GSM266740    | CELL |
| 89  | Nat Helper cell   | GSM465594    | CELL |
| 88  | Nat Helper cell   | GSM465593    | CELL |
| 87  | Tt cell           | GSM465596    | CELL |
| 86  | MS-1              | GSM234692    | CELL |
| 85  | Lymph-endo-cells  | GSM143704    | CELL |
| 84  | PP-FDC            | GSM481977    | CELL |
| 83  | PP-FDC            | GSM481978    | CELL |
| 82  | PP-FDC            | GSM481976    | CELL |
| 81  | E-L               | RMLNDC003001 | CELL |
| 80  | E-L               | RMLNDC003001 | CELL |
| 79  | Follicular-Bcells | GSM258664    | CELL |
| 78  | Follicular-Bcells | GSM258663    | CELL |
| 77  | MZ-Bcell          | GSM258622    | CELL |
| 76  | MZ-Bcell          | GSM258621    | CELL |
| 75  | BAF3              | GSM258620    | CELL |
| 74  | BAF3              | GSM258619    | CELL |
| 73  | Tregs             | GSM258778    | CELL |
| 72  | Tregs             | GSM258777    | CELL |
| 71  | T-cells-CD8+      | GSM258776    | CELL |
| 70  | T-cells-CD8+      | GSM258775    | CELL |
| 69  | T-cells-CD4+      | GSM258774    | CELL |
| 68  | T-cells-CD4+      | GSM258773    | CELL |
| 67  | Thymocyte-DN      | GSM465595    | CELL |
| 66  | Osteoclasts       | GSM258743    | CELL |
| 65  | Microglia         | GSM258721    | CELL |
| 64  | Microglia         | GSM258721    | CELL |
| 63  | PS-7h             | GSM258706    | CELL |
| 62  | PS-7h             | GSM258705    | CELL |
| 61  | PS-6h             | GSM258702    | CELL |
| 60  | PS-6h             | GSM258701    | CELL |
| 59  | PS-6h             | GSM258699    | CELL |
| 58  | PS-6h             | GSM258699    | CELL |
| 57  | PS-6h             | GSM258699    | CELL |
| 56  | PS-6h             | GSM258699    | CELL |
| 55  | PS-6h             | GSM258699    | CELL |
| 54  | PS-6h             | GSM258699    | CELL |
| 53  | PS-6h             | GSM258699    | CELL |
| 52  | PS-6h             | GSM258699    | CELL |
| 51  | PS-6h             | GSM258699    | CELL |
| 50  | PS-6h             | GSM258699    | CELL |
| 49  | PS-6h             | GSM258699    | CELL |
| 48  | PS-6h             | GSM258699    | CELL |
| 47  | PS-6h             | GSM258699    | CELL |
| 46  | PS-6h             | GSM258699    | CELL |
| 45  | PS-6h             | GSM258699    | CELL |
| 44  | PS-6h             | GSM258699    | CELL |
| 43  | PS-6h             | GSM258699    | CELL |
| 42  | PS-6h             | GSM258699    | CELL |
| 41  | PS-6h             | GSM258699    | CELL |
| 40  | PS-6h             | GSM258699    | CELL |
| 39  | PS-6h             | GSM258699    | CELL |
| 38  | PS-6h             | GSM258699    | CELL |
| 37  | PS-6h             | GSM258699    | CELL |
| 36  | PS-6h             | GSM258699    | CELL |
| 35  | PS-6h             | GSM258699    | CELL |
| 34  | PS-6h             | GSM258699    | CELL |
| 33  | PS-6h             | GSM258699    | CELL |
| 32  | PS-6h             | GSM258699    | CELL |
| 31  | PS-6h             | GSM258699    | CELL |
| 30  | PS-6h             | GSM258699    | CELL |
| 29  | PS-6h             | GSM258699    | CELL |
| 28  | PS-6h             | GSM258699    | CELL |
| 27  | PS-6h             | GSM258699    | CELL |
| 26  | PS-6h             | GSM258699    | CELL |
| 25  | PS-6h             | GSM258699    | CELL |
| 24  | PS-6h             | GSM258699    | CELL |
| 23  | PS-6h             | GSM258699    | CELL |
| 22  | PS-6h             | GSM258699    | CELL |
| 21  | PS-6h             | GSM258699    | CELL |
| 20  | PS-6h             | GSM258699    | CELL |
| 19  | PS-6h             | GSM258699    | CELL |
| 18  | PS-6h             | GSM258699    | CELL |
| 17  | PS-6h             | GSM258699    | CELL |
| 16  | PS-6h             | GSM258699    | CELL |
| 15  | PS-6h             | GSM258699    | CELL |
| 14  | PS-6h             | GSM258699    | CELL |
| 13  | PS-6h             | GSM258699    | CELL |
| 12  | PS-6h             | GSM258699    | CELL |
| 11  | PS-6h             | GSM258699    | CELL |
| 10  | PS-6h             | GSM258699    | CELL |
| 9   | PS-6h             | GSM258699    | CELL |
| 8   | PS-6h             | GSM258699    | CELL |
| 7   | PS-6h             | GSM258699    | CELL |
| 6   | PS-6h             | GSM258699    | CELL |
| 5   | PS-6h             | GSM258699    | CELL |
| 4   | PS-6h             | GSM258699    | CELL |
| 3   | PS-6h             | GSM258699    | CELL |
| 2   | PS-6h             | GSM258699    | CELL |
| 1   | PS-6h             | GSM258699    | CELL |



Cluster0046\_Chondrocyte & osteoblast-related (53 nodes)

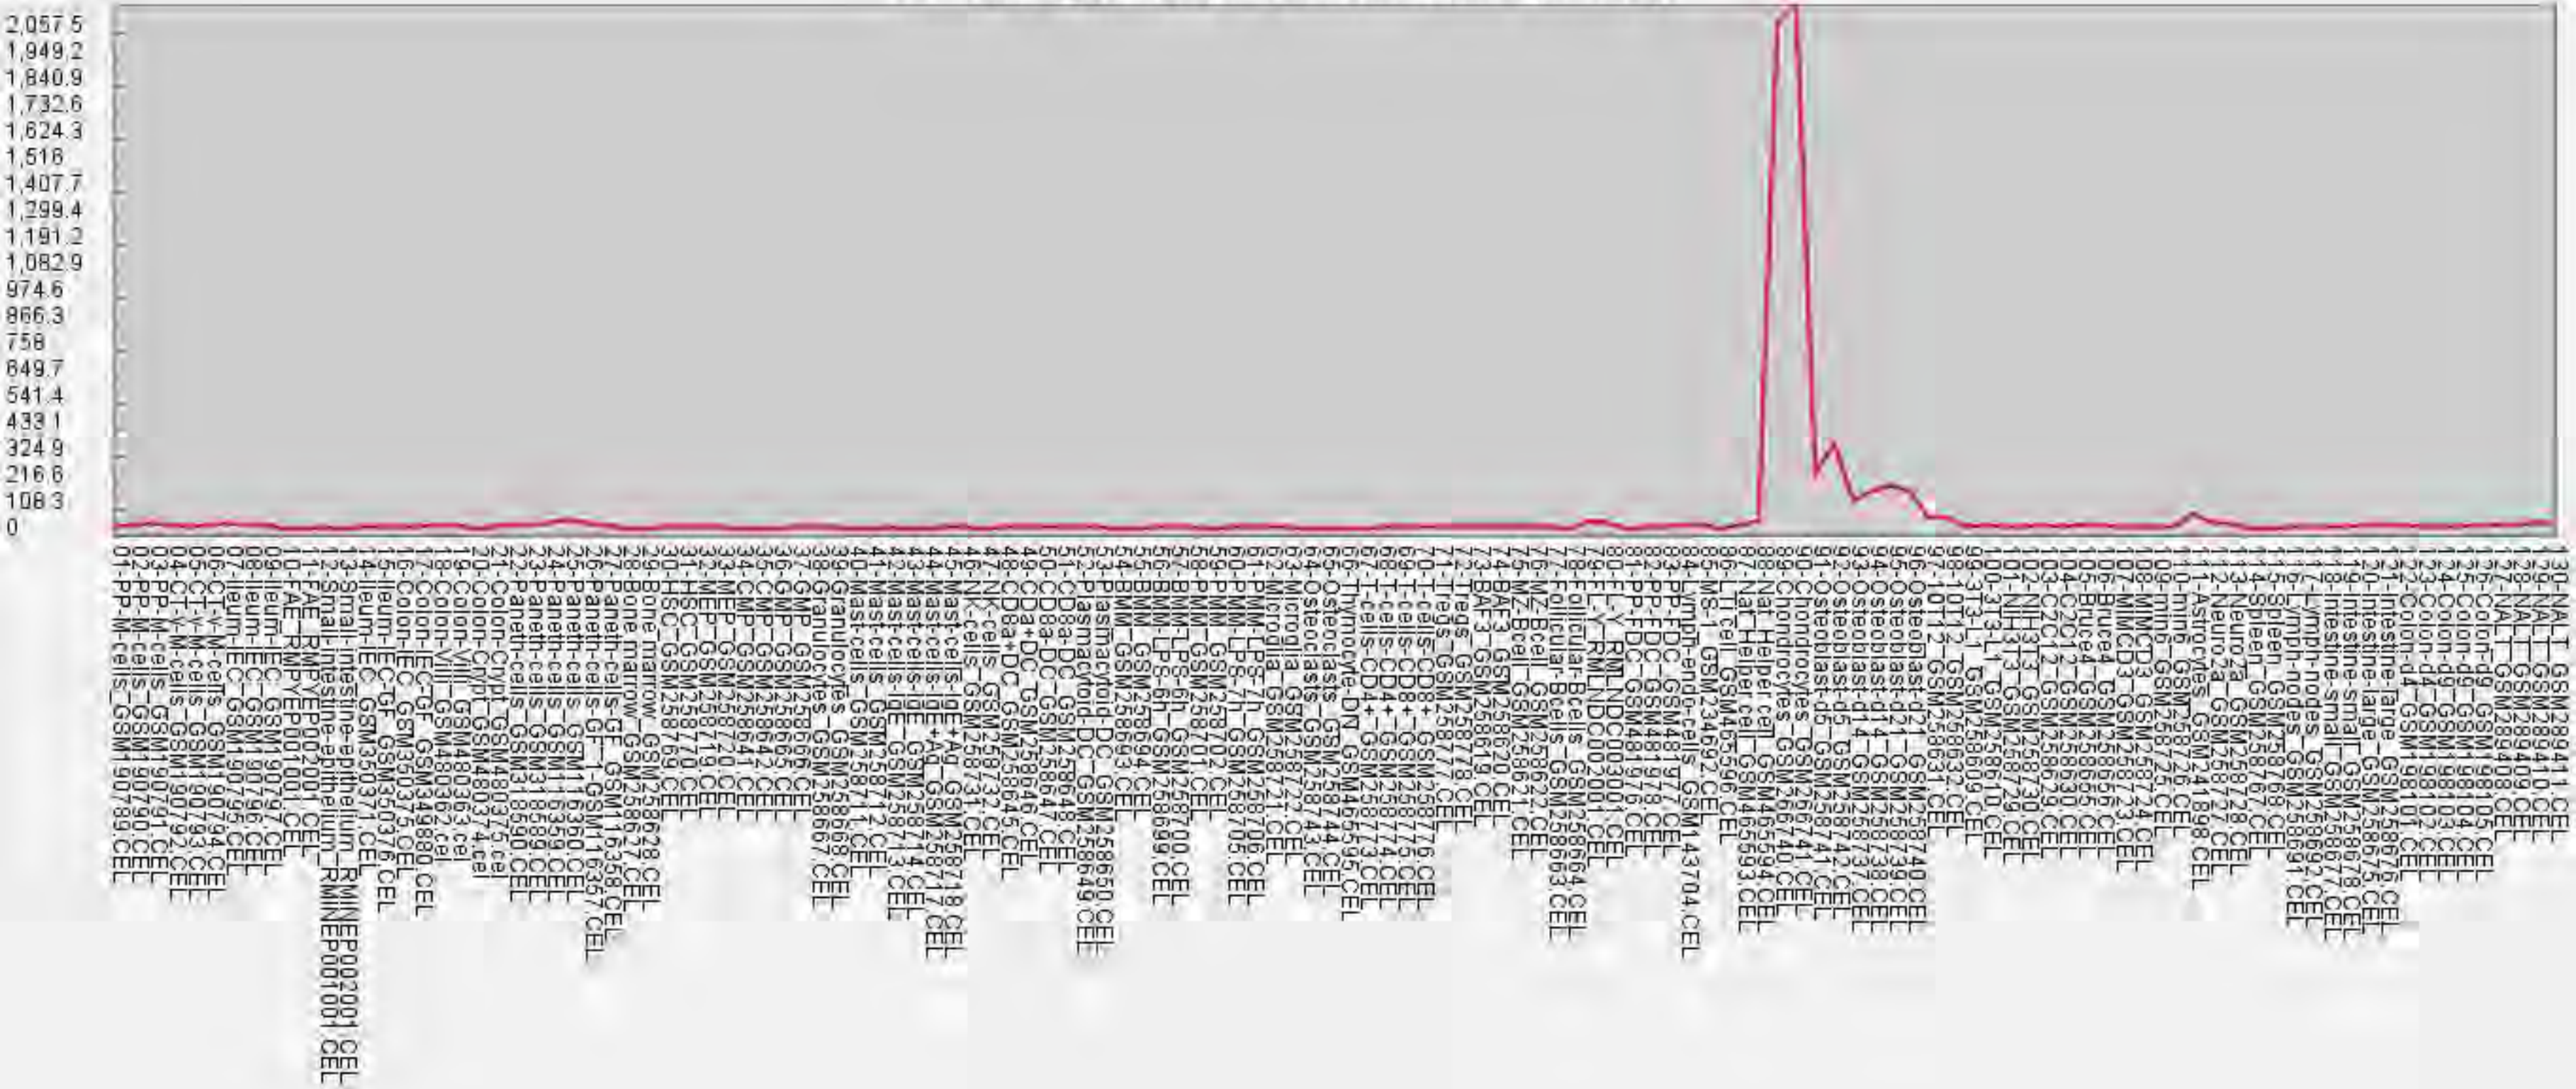



Cluster0047\_Low in many (52 nodes)

102.1  
96.7  
91.3  
85.9  
80.6  
75.2  
69.8  
64.5  
59.1  
53.7  
48.3  
43  
37.6  
32.2  
26.9  
21.5  
16.1  
10.7  
5.4  
0

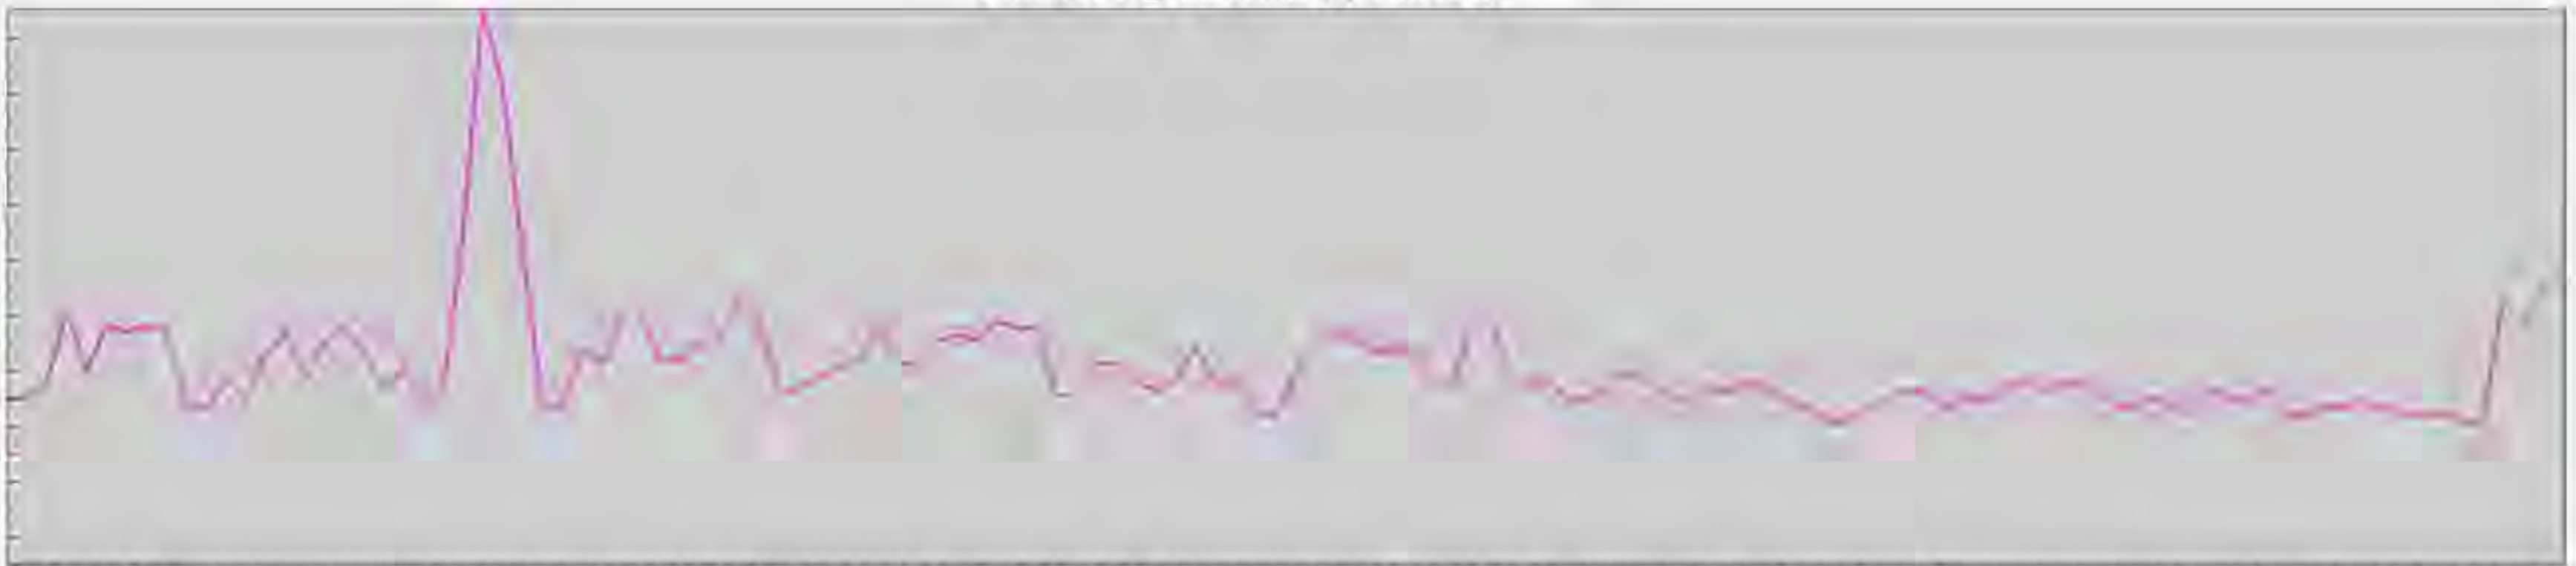

130-NALT GSM289411.CEL  
129-NALT GSM289410.CEL  
128-NALT GSM289409.CEL  
127-NALT GSM289408.CEL  
126-Colon-d9 GSM1988105.CEL  
125-Colon-d9 GSM1988104.CEL  
124-Colon-d9 GSM1988103.CEL  
123-Colon-d4 GSM1988102.CEL  
122-Colon-d4 GSM1988101.CEL  
121-Intestine-large GSM258676.CEL  
120-Intestine-large GSM258675.CEL  
119-Intestine-small GSM258678.CEL  
118-Intestine-small GSM258677.CEL  
117-Lymph-nodes GSM258691.CEL  
116-Lymph-nodes GSM258676.CEL  
115-Spleen GSM258676.CEL  
114-Spleen GSM258676.CEL  
113-Neuro2a GSM258728.CEL  
112-Neuro2a GSM258727.CEL  
111-Astrocytes GSM241898.CEL  
110-mim6 GSM258726.CEL  
109-mim6 GSM258725.CEL  
108-MIMCD3 GSM258724.CEL  
107-MIMCD3 GSM258723.CEL  
106-Bruce4 GSM258656.CEL  
105-Bruce4 GSM258656.CEL  
104-C2C12 GSM258690.CEL  
103-C2C12 GSM258629.CEL  
102-NH3T3 GSM258739.CEL  
101-NH3T3 GSM258739.CEL  
100-3T3-L1 GSM258610.CEL  
99-3T3-L1 GSM258609.CEL  
98-10T12 GSM258632.CEL  
97-10T12 GSM258631.CEL  
96-Osteoblast-d21 GSM258740.CEL  
95-Osteoblast-d21 GSM258739.CEL  
94-Osteoblast-d14 GSM258738.CEL  
93-Osteoblast-d14 GSM258737.CEL  
92-Osteoblast-d5 GSM258742.CEL  
91-Osteoblast-d5 GSM258741.CEL  
90-Chondrocytes GSM266741.CEL  
89-Chondrocytes GSM266740.CEL  
88-Nat Helper cell GSM465594.CEL  
87-Nat Helper cell GSM465593.CEL  
86-TT cell GSM465596.CEL  
85-MS-1 GSM234692.CEL  
84-Lymph-endo-cells GSM143704.CEL  
83-PP-FDC GSM481977.CEL  
82-PP-FDC GSM481978.CEL  
81-PP-FDC GSM481976.CEL  
80-LY-RMLND C002001.CEL  
79-LY-RMLND C002001.CEL  
78-Follicular-Bcells GSM258664.CEL  
77-Follicular-Bcells GSM258663.CEL  
76-MZ-Bcell GSM258622.CEL  
75-MZ-Bcell GSM258621.CEL  
74-BAF3 GSM258620.CEL  
73-BAF3 GSM258619.CEL  
72-Tregs GSM258778.CEL  
71-Tregs GSM258777.CEL  
70-T-cells-CD8+ GSM258776.CEL  
69-T-cells-CD8+ GSM258774.CEL  
68-T-cells-CD4+ GSM258773.CEL  
67-T-cells-CD4+ GSM258773.CEL  
66-Thymocyte-DN GSM465595.CEL  
65-Osteoclasts GSM258743.CEL  
64-Microglia GSM258721.CEL  
63-Microglia GSM258721.CEL  
62-MM-LPS-7h GSM258706.CEL  
61-MM-LPS-7h GSM258706.CEL  
60-MM-LPS-7h GSM258705.CEL  
59-MM-LPS-6h GSM258702.CEL  
58-MM-LPS-6h GSM258702.CEL  
57-MM-LPS-6h GSM258699.CEL  
56-MM-LPS-6h GSM258699.CEL  
55-BM258694.CEL  
54-BM258694.CEL  
53-Plasmacytoid-DC GSM258650.CEL  
52-Plasmacytoid-DC GSM258649.CEL  
51-CD8a-DC GSM258648.CEL  
50-CD8a-DC GSM258647.CEL  
49-CD8a+DC GSM258646.CEL  
48-CD8a+DC GSM258646.CEL  
47-NK-cells GSM258732.CEL  
46-NK-cells GSM258731.CEL  
45-Mast-cells-IgE+Ad GSM258718.CEL  
44-Mast-cells-IgE+Ad GSM258717.CEL  
43-Mast-cells-IgE GSM258714.CEL  
42-Mast-cells-IgE GSM258713.CEL  
41-Mast-cells GSM258712.CEL  
40-Granulocytes GSM258711.CEL  
39-Granulocytes GSM258668.CEL  
38-Granulocytes GSM258667.CEL  
37-GMP GSM258666.CEL  
36-GMP GSM258666.CEL  
35-GMP GSM258642.CEL  
34-GMP GSM258642.CEL  
33-MEP GSM258720.CEL  
32-MEP GSM258719.CEL  
31-HESC GSM258770.CEL  
30-HESC GSM258770.CEL  
29-Bone marrow GSM258628.CEL  
28-Bone marrow GSM258627.CEL  
27-Paneth-cells-GE GSM116358.CEL  
26-Paneth-cells-GE GSM116357.CEL  
25-Paneth-cells GSM116350.CEL  
24-Paneth-cells GSM116350.CEL  
23-Paneth-cells GSM318589.CEL  
22-Paneth-cells GSM318589.CEL  
21-Colon-Crypt GSM480375.CEL  
20-Colon-Crypt GSM480374.CEL  
19-Colon-Vill GSM480363.CEL  
18-Colon-Vill GSM480362.CEL  
17-Colon-IEC-GE GSM349880.CEL  
16-Colon-IEC-GE GSM350375.CEL  
15-Ileum-IEC-TGF GSM350376.CEL  
14-Ileum-IEC GSM350371.CEL  
13-Small-intestine-epithelium RMINEP002001.CEL  
12-Small-intestine-epithelium RMINEP001001.CEL  
11-FAE-RMPYEP002001.CEL  
10-FAE-RMPYEP001001.CEL  
09-Ileum-IEC GSM190797.CEL  
08-Ileum-IEC GSM190796.CEL  
07-Ileum-IEC GSM190795.CEL  
06-CT-v-M-cells GSM190794.CEL  
05-CT-v-M-cells GSM190793.CEL  
04-CT-v-M-cells GSM190792.CEL  
03-PP-M-cells GSM190791.CEL  
02-PP-M-cells GSM190790.CEL  
01-PP-M-cells GSM190789.CEL



Cluster0048\_Thymocyte-related (49 nodes)

1,041.8  
987  
832.2  
877.3  
822.5  
767.7  
712.8  
658  
603.2  
548.3  
493.5  
438.7  
383.8  
329  
274.2  
219.3  
164.5  
109.7  
54.8  
0

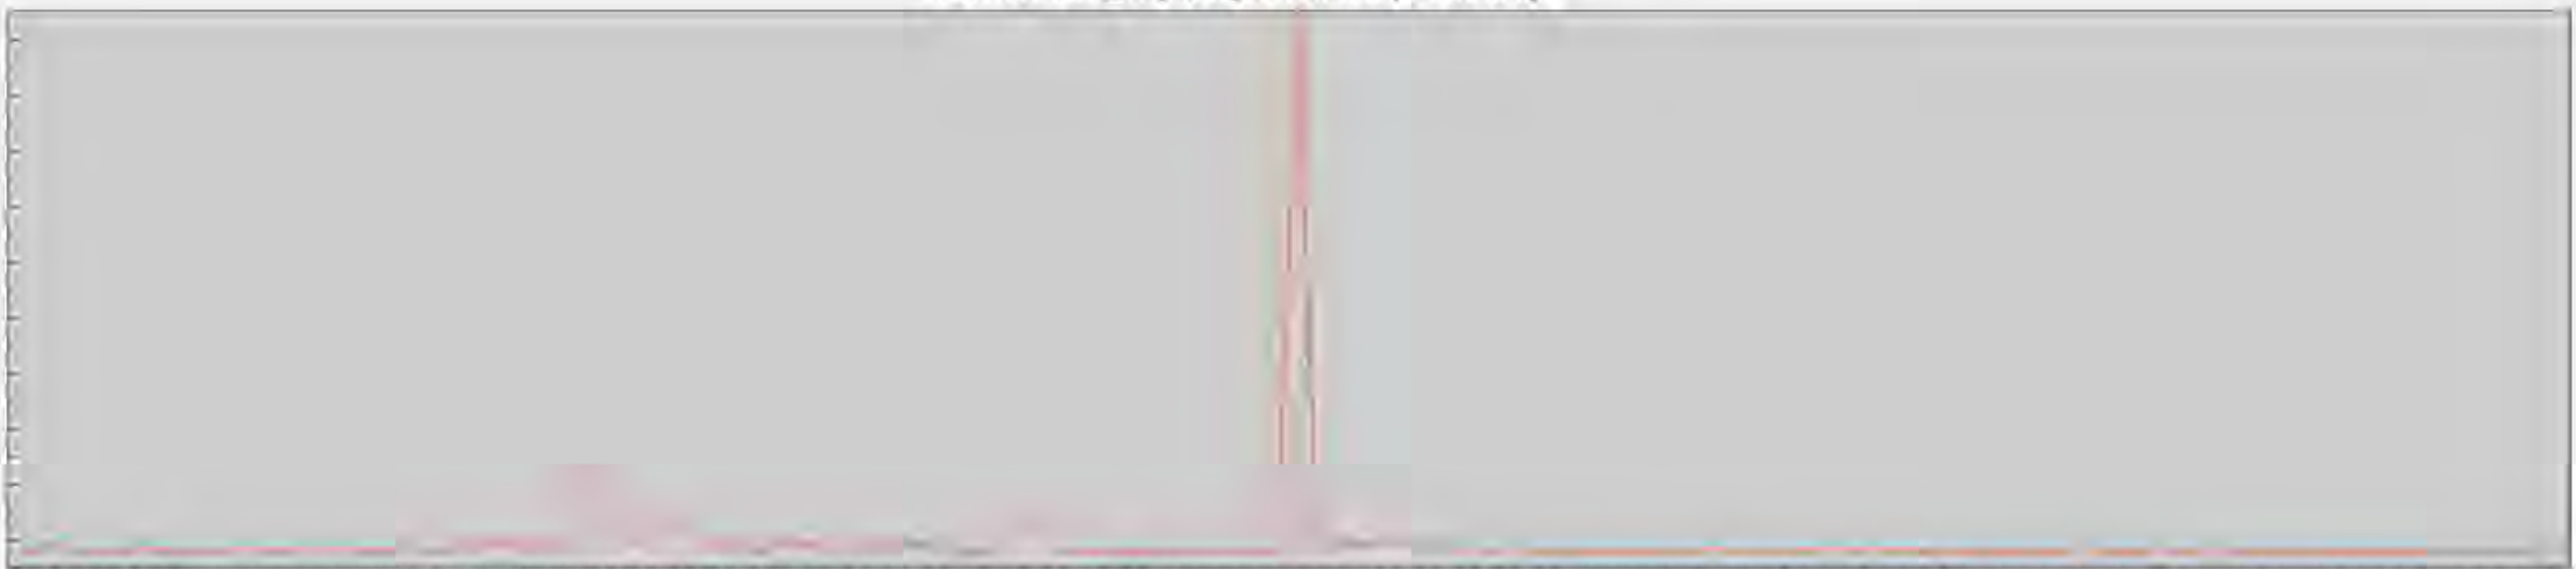

30-NALT GSM289411 CELL  
 129-NALT GSM289410 CELL  
 128-NALT GSM289409 CELL  
 127-NALT GSM289408 CELL  
 126-Color-d9 GSM1988105 CELL  
 125-Color-d9 GSM1988104 CELL  
 124-Color-d9 GSM1988103 CELL  
 123-Color-d4 GSM1988102 CELL  
 122-Color-d4 GSM1988101 CELL  
 121-Intestine-large GSM258676 CELL  
 120-Intestine-large GSM258675 CELL  
 119-Intestine-small GSM258674 CELL  
 118-Intestine-small GSM258673 CELL  
 117-Lymph-nodes GSM258672 CELL  
 116-Spleen GSM258671 CELL  
 115-Spleen GSM258670 CELL  
 114-Spleen GSM258669 CELL  
 113-Neuro2a GSM241898 CELL  
 112-Neuro2a GSM241897 CELL  
 111-Astrocytes GSM241896 CELL  
 110-mimb GSM258726 CELL  
 109-mimb GSM258725 CELL  
 108-MIMCD3 GSM258724 CELL  
 107-MIMCD3 GSM258723 CELL  
 106-Bruce4 GSM258665 CELL  
 105-Bruce4 GSM258664 CELL  
 104-C2C12 GSM258663 CELL  
 103-C2C12 GSM258662 CELL  
 102-NH3T3 GSM258730 CELL  
 101-NH3T3 GSM258729 CELL  
 100-3T3-L1 GSM258610 CELL  
 99-3T3-L1 GSM258609 CELL  
 98-10T12 GSM258632 CELL  
 97-10T12 GSM258631 CELL  
 96-Osteoblast-d21 GSM258740 CELL  
 95-Osteoblast-d21 GSM258739 CELL  
 94-Osteoblast-d14 GSM258738 CELL  
 93-Osteoblast-d14 GSM258737 CELL  
 92-Osteoblast-d5 GSM258742 CELL  
 91-Osteoblast-d5 GSM258741 CELL  
 90-Chondrocytes GSM266741 CELL  
 89-Chondrocytes GSM266740 CELL  
 88-Nat Helper cell GSM465594 CELL  
 87-Nat Helper cell GSM465593 CELL  
 86-TT cell GSM465596 CELL  
 85-MS-1 GSM234692 CELL  
 84-Lymph-endo-cells GSM143704 CELL  
 83-P-FDC GSM481977 CELL  
 82-P-FDC GSM481978 CELL  
 81-P-FDC GSM481976 CELL  
 80-L-Y RMLNDCC003001 CELL  
 79-L-Y RMLNDCC003001 CELL  
 78-Follicular-Bcells GSM258664 CELL  
 77-Follicular-Bcells GSM258663 CELL  
 76-MZ-Bcell GSM258627 CELL  
 75-MZ-Bcell GSM258627 CELL  
 74-BAF3 GSM258620 CELL  
 73-BAF3 GSM258619 CELL  
 72-Tregs GSM258778 CELL  
 71-Tregs GSM258777 CELL  
 70-T-cells-CD8+ GSM258776 CELL  
 69-T-cells-CD8+ GSM258774 CELL  
 68-T-cells-CD4+ GSM258773 CELL  
 67-T-cells-CD4+ GSM258773 CELL  
 66-Thymocyte-DN GSM465595 CELL  
 65-Osteoclasts GSM258744 CELL  
 64-Microglia GSM258721 CELL  
 63-Microglia GSM258721 CELL  
 62-MM-LPS-7h GSM268706 CELL  
 61-MM-LPS-7h GSM268706 CELL  
 60-MM-LPS-7h GSM268705 CELL  
 59-MM-LPS-6h GSM258702 CELL  
 58-MM-LPS-6h GSM258702 CELL  
 57-MM-LPS-6h GSM258699 CELL  
 56-MM-LPS-6h GSM258699 CELL  
 55-MM-LPS-6h GSM258694 CELL  
 54-MM-LPS-6h GSM258694 CELL  
 53-Ismacryoid-DC GSM258650 CELL  
 52-Ismacryoid-DC GSM258649 CELL  
 51-CD8a-DC GSM258648 CELL  
 50-CD8a-DC GSM258647 CELL  
 49-CD8a+DC GSM258646 CELL  
 48-CD8a+DC GSM258646 CELL  
 47-NK-cells GSM258732 CELL  
 46-NK-cells GSM258731 CELL  
 45-Mast-cells-IgE+Ad GSM258718 CELL  
 44-Mast-cells-IgE+Ad GSM258717 CELL  
 43-Mast-cells-IgE GSM258714 CELL  
 42-Mast-cells-IgE GSM258713 CELL  
 41-Mast-cells GSM258712 CELL  
 40-Granulocytes GSM258668 CELL  
 39-Granulocytes GSM258667 CELL  
 38-GMP GSM258666 CELL  
 37-GMP GSM258665 CELL  
 36-GMP GSM258664 CELL  
 35-CMP GSM258642 CELL  
 34-MIEP GSM258770 CELL  
 33-MIEP GSM258770 CELL  
 32-HESC GSM258770 CELL  
 31-HESC GSM258770 CELL  
 29-Bone marrow GSM258628 CELL  
 28-Bone marrow GSM258627 CELL  
 27-paneth-cells-GE GSM116358 CELL  
 26-paneth-cells-GE GSM116357 CELL  
 25-paneth-cells GSM116350 CELL  
 24-paneth-cells GSM116359 CELL  
 23-paneth-cells GSM318589 CELL  
 22-paneth-cells GSM318590 CELL  
 21-paneth-cells GSM480375 CELL  
 20-Colon-Crypt GSM480374 CELL  
 19-Colon-Vill GSM480363 CELL  
 18-Colon-Vill GSM480362 CELL  
 17-Colon-IEC-GE GSM349880 CELL  
 16-Colon-IEC-GE GSM350375 CELL  
 15-Ileum-IEC-TGF GSM350376 CELL  
 14-Ileum-IEC GSM350371 CELL  
 13-Small-intestine-epithelium RMINEP002901 CELL  
 12-Small-intestine-epithelium RMINEP001001 CELL  
 11-FAE-RMPYEP001001 CELL  
 10-FAE-RMPYEP001001 CELL  
 9-Ileum-IEC GSM190797 CELL  
 8-Ileum-IEC GSM190796 CELL  
 7-Ileum-IEC GSM190795 CELL  
 6-CT-w-M-cells GSM190794 CELL  
 5-CT-y-M-cells GSM190793 CELL  
 4-CT-y-M-cells GSM190792 CELL  
 03-PP-M-cells GSM190791 CELL  
 02-PP-M-cells GSM190790 CELL  
 01-PP-M-cells GSM190789 CELL



Cluster0049\_intestine-related (48 nodes)

2,347.5  
2,224  
2,100.4  
1,978.9  
1,853.3  
1,729.8  
1,606.2  
1,482.7  
1,359.1  
1,235.5  
1,112  
988.4  
864.9  
741.3  
617.8  
494.2  
370.7  
247.1  
123.6  
0

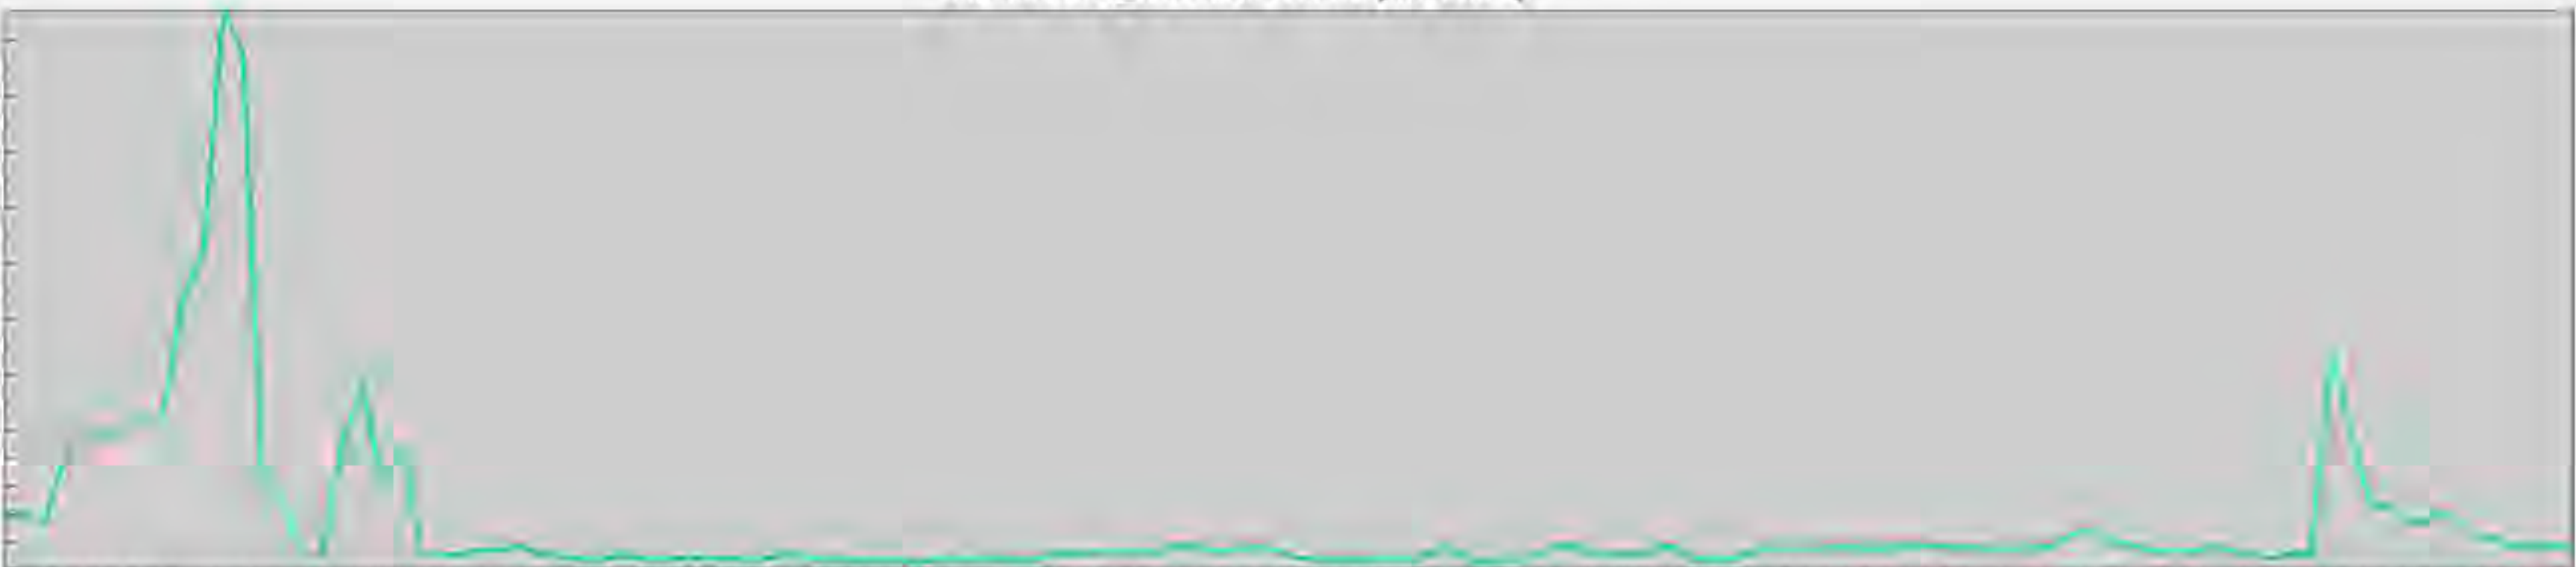

01-PP-M-cells\_GSM190789.CEL  
 02-PP-M-cells\_GSM190790.CEL  
 03-PP-M-cells\_GSM190791.CEL  
 04-CT-V-M-cells\_GSM190792.CEL  
 05-CT-V-M-cells\_GSM190793.CEL  
 06-CT-V-M-cells\_GSM190794.CEL  
 07-Ileum-IEC\_GSM190795.CEL  
 08-Ileum-IEC\_GSM190796.CEL  
 09-Ileum-IEC\_GSM190797.CEL  
 10-FAE-RMP-EP001001.CEL  
 11-FAE-RMP-EP002001.CEL  
 12-Small-intestine-epithelium\_RMINEP001001.CEL  
 13-Small-intestine-epithelium\_RMINEP002001.CEL  
 14-Ileum-IEC-GF\_GSM350371.CEL  
 15-Ileum-IEC-GF\_GSM350375.CEL  
 16-Colon-IEC-GF\_GSM349880.CEL  
 17-Colon-VIII-GSM480362.CEL  
 18-Colon-VIII-GSM480363.CEL  
 19-Colon-VIII-GSM480364.CEL  
 20-Colon-Crypt-GSM480374.CEL  
 21-Colon-Crypt-GSM480375.CEL  
 22-Paneth-cells-GSM318589.CEL  
 23-Paneth-cells-GSM318590.CEL  
 24-Paneth-cells-GSM116359.CEL  
 25-Paneth-cells-GSM116359.CEL  
 26-Paneth-cells-GF-1-GSM116357.CEL  
 27-Paneth-cells-GF-1-GSM116357.CEL  
 28-Bone marrow\_GSM258627.CEL  
 29-Bone marrow\_GSM258627.CEL  
 30-HSC-GSM258770.CEL  
 31-HSC-GSM258770.CEL  
 32-MEP-GSM258771.CEL  
 33-MEP-GSM258771.CEL  
 34-MEP-GSM258864.CEL  
 35-MEP-GSM258864.CEL  
 36-MEP-GSM258864.CEL  
 37-MEP-GSM258864.CEL  
 38-MEP-GSM258864.CEL  
 39-Granulocytes\_GSM258867.CEL  
 40-Granulocytes\_GSM258867.CEL  
 41-Mast-cells-GSM258712.CEL  
 42-Mast-cells-GSM258712.CEL  
 43-Mast-cells-IdU+Ad-GSM258714.CEL  
 44-Mast-cells-IdU+Ad-GSM258714.CEL  
 45-Mast-cells-IdU+Ad-GSM258719.CEL  
 46-NK-cells\_GSM258732.CEL  
 47-NK-cells\_GSM258732.CEL  
 48-CD8a+DC\_GSM258646.CEL  
 49-CD8a+DC\_GSM258646.CEL  
 50-CD8a-DC\_GSM258647.CEL  
 51-CD8a-DC\_GSM258647.CEL  
 52-Plasmacytoid-DC\_GSM258649.CEL  
 53-Plasmacytoid-DC\_GSM258649.CEL  
 54-BMM-GSM258694.CEL  
 55-BMM-GSM258694.CEL  
 56-BMM-LPS-6h-GSM258700.CEL  
 57-BMM-LPS-6h-GSM258700.CEL  
 58-BMM-LPS-7h-GSM258705.CEL  
 59-BMM-LPS-7h-GSM258705.CEL  
 60-Microglia\_GSM258721.CEL  
 61-Microglia\_GSM258721.CEL  
 62-Microglia\_GSM258721.CEL  
 63-Osteoclasts\_GSM258743.CEL  
 64-Osteoclasts\_GSM258743.CEL  
 65-Thymocyte-DN\_GSM465595.CEL  
 66-Thymocyte-DN\_GSM465595.CEL  
 67-T-cells-CD4+GSM258773.CEL  
 68-T-cells-CD4+GSM258773.CEL  
 69-T-cells-CD8+GSM258775.CEL  
 70-T-cells-CD8+GSM258775.CEL  
 71-Tregs\_GSM258778.CEL  
 72-Tregs\_GSM258778.CEL  
 73-Tregs\_GSM258819.CEL  
 74-BAF3\_GSM258820.CEL  
 75-BAF3\_GSM258820.CEL  
 76-MZ-Bcell\_GSM258822.CEL  
 77-Follicular-Bcells\_GSM258853.CEL  
 78-Follicular-Bcells\_GSM258853.CEL  
 79-Follicular-Bcells\_GSM258853.CEL  
 80-L-Y-RMLNDC002001.CEL  
 81-L-Y-RMLNDC003001.CEL  
 82-L-Y-RMLNDC003001.CEL  
 83-L-Y-RMLNDC003001.CEL  
 84-Lymph-endo-cells\_GSM143704.CEL  
 85-Lymph-endo-cells\_GSM143704.CEL  
 86-Lymph-endo-cells\_GSM143704.CEL  
 87-Nat Helper cell\_GSM465593.CEL  
 88-Nat Helper cell\_GSM465593.CEL  
 89-Nat Helper cell\_GSM465593.CEL  
 90-Chondrocytes\_GSM258741.CEL  
 91-Chondrocytes\_GSM258741.CEL  
 92-Osteoblast-d5\_GSM258742.CEL  
 93-Osteoblast-d5\_GSM258742.CEL  
 94-Osteoblast-d14\_GSM258737.CEL  
 95-Osteoblast-d21\_GSM258738.CEL  
 96-Osteoblast-d21\_GSM258738.CEL  
 97-Osteoblast-d21\_GSM258631.CEL  
 98-Osteoblast-d21\_GSM258631.CEL  
 99-3T3-L1\_GSM258609.CEL  
 100-3T3-L1\_GSM258610.CEL  
 101-NH3T3\_GSM258739.CEL  
 102-NH3T3\_GSM258739.CEL  
 103-C2C12\_GSM258829.CEL  
 104-C2C12\_GSM258829.CEL  
 105-Bruce4\_GSM258866.CEL  
 106-Bruce4\_GSM258866.CEL  
 107-MIMCD3\_GSM258723.CEL  
 108-MIMCD3\_GSM258723.CEL  
 109-mim6\_GSM258725.CEL  
 110-mim6\_GSM258725.CEL  
 111-Astrocytes\_GSM241898.CEL  
 112-Astrocytes\_GSM241898.CEL  
 113-Spleen\_GSM258767.CEL  
 114-Spleen\_GSM258767.CEL  
 115-Spleen\_GSM258767.CEL  
 116-Lymph-nodes\_GSM258691.CEL  
 117-Lymph-nodes\_GSM258691.CEL  
 118-Intestine-small\_GSM258677.CEL  
 119-Intestine-small\_GSM258677.CEL  
 120-Intestine-large\_GSM258677.CEL  
 121-Intestine-large\_GSM258677.CEL  
 122-Intestine-large\_GSM258677.CEL  
 123-Colon-d4-GSM198810.CEL  
 124-Colon-d4-GSM198810.CEL  
 125-Colon-d9-GSM198810.CEL  
 126-Colon-d9-GSM198810.CEL  
 127-NALT\_GSM289408.CEL  
 128-NALT\_GSM289408.CEL  
 129-NALT\_GSM289410.CEL  
 130-NALT\_GSM289411.CEL



Cluster0050\_House keeping-mitochondrion (46 nodes)

4,308.2  
4,081.4  
3,854.7  
3,627.9  
3,401.2  
3,174.4  
2,947.7  
2,720.9  
2,494.2  
2,267.4  
2,040.7  
1,814  
1,587.2  
1,360.5  
1,133.7  
907  
680.2  
453.5  
228.7  
0

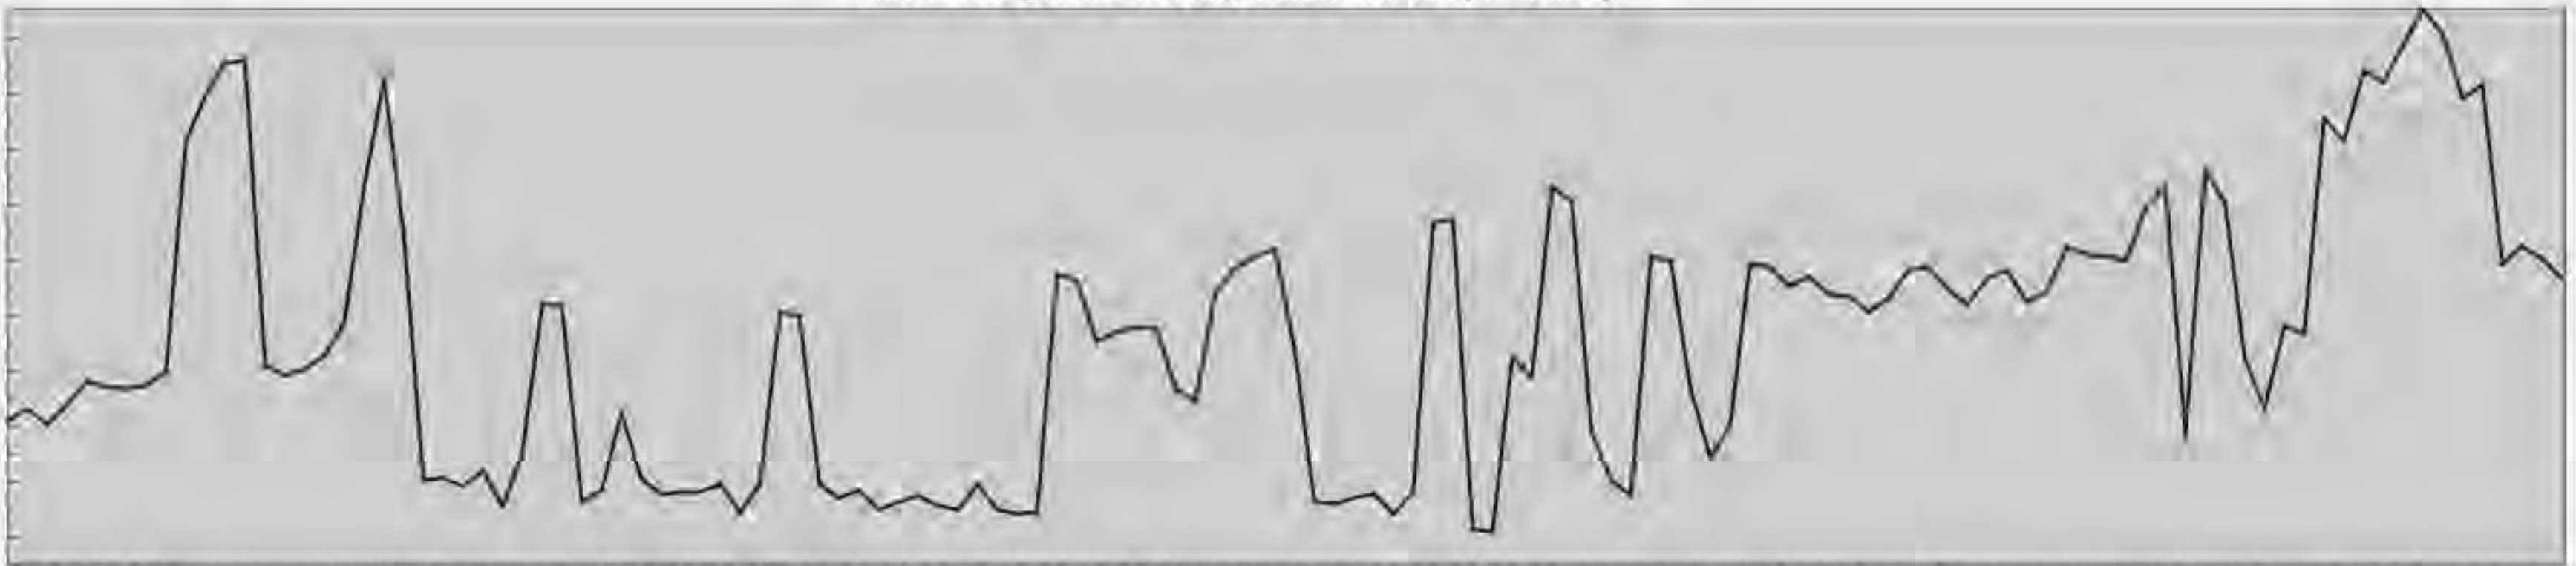

130- NALT GSM289411.CEL  
129- NALT GSM289410.CEL  
128- NALT GSM289409.CEL  
127- NALT GSM289408.CEL  
126- Colon-d9 GSM1988105.CEL  
125- Colon-d9 GSM1988104.CEL  
124- Colon-d9 GSM1988103.CEL  
123- Colon-d4 GSM1988102.CEL  
122- Colon-d4 GSM1988101.CEL  
121- Intestine-large GSM258676.CEL  
120- Intestine-large GSM258675.CEL  
119- Intestine-small GSM258678.CEL  
118- Intestine-small GSM258692.CEL  
117- Lymph-nodes GSM258691.CEL  
116- Lymph-nodes GSM258726.CEL  
115- Spleen GSM258768.CEL  
114- Spleen GSM258767.CEL  
113- Neuro2a GSM258728.CEL  
112- Neuro2a GSM258727.CEL  
111- Astrocytes GSM241898.CEL  
110- mimg GSM258726.CEL  
109- mimg GSM258725.CEL  
108- MIMCD3 GSM258724.CEL  
107- MIMCD3 GSM258723.CEL  
106- Bruce4 GSM258656.CEL  
105- Bruce4 GSM258655.CEL  
104- C2C12 GSM258690.CEL  
103- C2C12 GSM258689.CEL  
102- NIH3T3 GSM258730.CEL  
101- NIH3T3 GSM258729.CEL  
99- 3T3-L1 GSM258610.CEL  
98- 3T3-L1 GSM258609.CEL  
97- 10T12 GSM258632.CEL  
96- Osteoblast-d21 GSM258740.CEL  
95- Osteoblast-d21 GSM258739.CEL  
94- Osteoblast-d14 GSM258738.CEL  
93- Osteoblast-d14 GSM258737.CEL  
92- Osteoblast-d5 GSM258742.CEL  
91- Osteoblast-d5 GSM258741.CEL  
90- Chondrocytes GSM266741.CEL  
89- Chondrocytes GSM266740.CEL  
88- Nat Helper cell GSM465594.CEL  
87- Nat Helper cell GSM465593.CEL  
86- Tt cell GSM465596.CEL  
85- MS-1 GSM234692.CEL  
84- Lymph-endo-cells GSM143704.CEL  
83- PP-FDC GSM481977.CEL  
82- PP-FDC GSM481978.CEL  
81- PP-FDC GSM481976.CEL  
80- FLY RMLNDCC003001.CEL  
79- FLY RMLNDCC003001.CEL  
78- Follicular-Bcells GSM258664.CEL  
77- MZ-Bcell GSM258627.CEL  
76- MZ-Bcell GSM258627.CEL  
75- BAF3 GSM258620.CEL  
74- BAF3 GSM258619.CEL  
73- Tregs GSM258778.CEL  
72- Tregs GSM258777.CEL  
71- T-cells-CD8+ GSM258776.CEL  
70- T-cells-CD8+ GSM258775.CEL  
69- T-cells-CD4+ GSM258774.CEL  
68- T-cells-CD4+ GSM258773.CEL  
67- Thymocyte-DN GSM465595.CEL  
66- Osteoclasts GSM258744.CEL  
65- Osteoclasts GSM258743.CEL  
64- Microglia GSM258721.CEL  
63- Microglia GSM258721.CEL  
62- PMS-7h GSM268706.CEL  
61- PMS-7h GSM268705.CEL  
60- PMS-6h GSM258702.CEL  
59- PMS-6h GSM258701.CEL  
58- BMM-LPS-6h GSM258699.CEL  
57- BMM-LPS-6h GSM258699.CEL  
56- BMM-LPS-6h GSM258699.CEL  
55- BMM-LPS-6h GSM258699.CEL  
54- BMM-LPS-6h GSM258699.CEL  
53- BMM-LPS-6h GSM258699.CEL  
52- BMM-LPS-6h GSM258699.CEL  
51- BMM-LPS-6h GSM258699.CEL  
50- CD8a-DC GSM258647.CEL  
49- CD8a-DC GSM258647.CEL  
48- CD8a+DC GSM258646.CEL  
47- NK-cells GSM258732.CEL  
46- NK-cells GSM258731.CEL  
45- Mast-cells-IgE+Ad GSM258718.CEL  
44- Mast-cells-IgE+Ad GSM258717.CEL  
43- Mast-cells-IgE GSM258714.CEL  
42- Mast-cells-IgE GSM258713.CEL  
41- Mast-cells GSM258712.CEL  
40- Mast-cells GSM258711.CEL  
39- Granulocytes GSM258668.CEL  
38- Granulocytes GSM258667.CEL  
37- GMP GSM258666.CEL  
36- GMP GSM258665.CEL  
35- GMP GSM258664.CEL  
34- GMP GSM258664.CEL  
33- MIEP GSM258720.CEL  
32- MIEP GSM258719.CEL  
31- H9C GSM258770.CEL  
30- H9C GSM258769.CEL  
29- Bone marrow GSM258628.CEL  
28- Bone marrow GSM258627.CEL  
27- paneth-cells-GE GSM116358.CEL  
26- paneth-cells-GE GSM116357.CEL  
25- paneth-cells GSM116350.CEL  
24- paneth-cells GSM116359.CEL  
23- paneth-cells GSM318589.CEL  
22- paneth-cells GSM318590.CEL  
21- Colon-Crypt GSM480375.CEL  
20- Colon-Crypt GSM480374.CEL  
19- Colon-Vill GSM480363.CEL  
18- Colon-Vill GSM480362.CEL  
17- Colon-IEC-GE GSM349880.CEL  
16- Colon-IEC-GE GSM350375.CEL  
15- Ileum-IEC GSM350376.CEL  
14- Ileum-IEC GSM350371.CEL  
13- Small-intestine-epithelium RMINEP002001.CEL  
12- Small-intestine-epithelium RMINEP001001.CEL  
11- FAE RMPYEP002001.CEL  
10- FAE RMPYEP001001.CEL  
09- Ileum-IEC GSM190797.CEL  
08- Ileum-IEC GSM190796.CEL  
07- Ileum-IEC GSM190795.CEL  
06- CT-v-M-cells GSM190794.CEL  
05- CT-v-M-cells GSM190793.CEL  
04- CT-v-M-cells GSM190792.CEL  
03- PP-M-cells GSM190791.CEL  
02- PP-M-cells GSM190790.CEL  
01- PP-M-cells GSM190789.CEL



Cluster0051\_Extracellular matrix-related (42 nodes)

1,709.4  
1,619.5  
1,529.5  
1,439.5  
1,349.6  
1,259.6  
1,169.6  
1,079.7  
989.7  
899.7  
809.7  
719.8  
629.8  
539.8  
449.9  
359.9  
269.9  
179.9  
90  
0

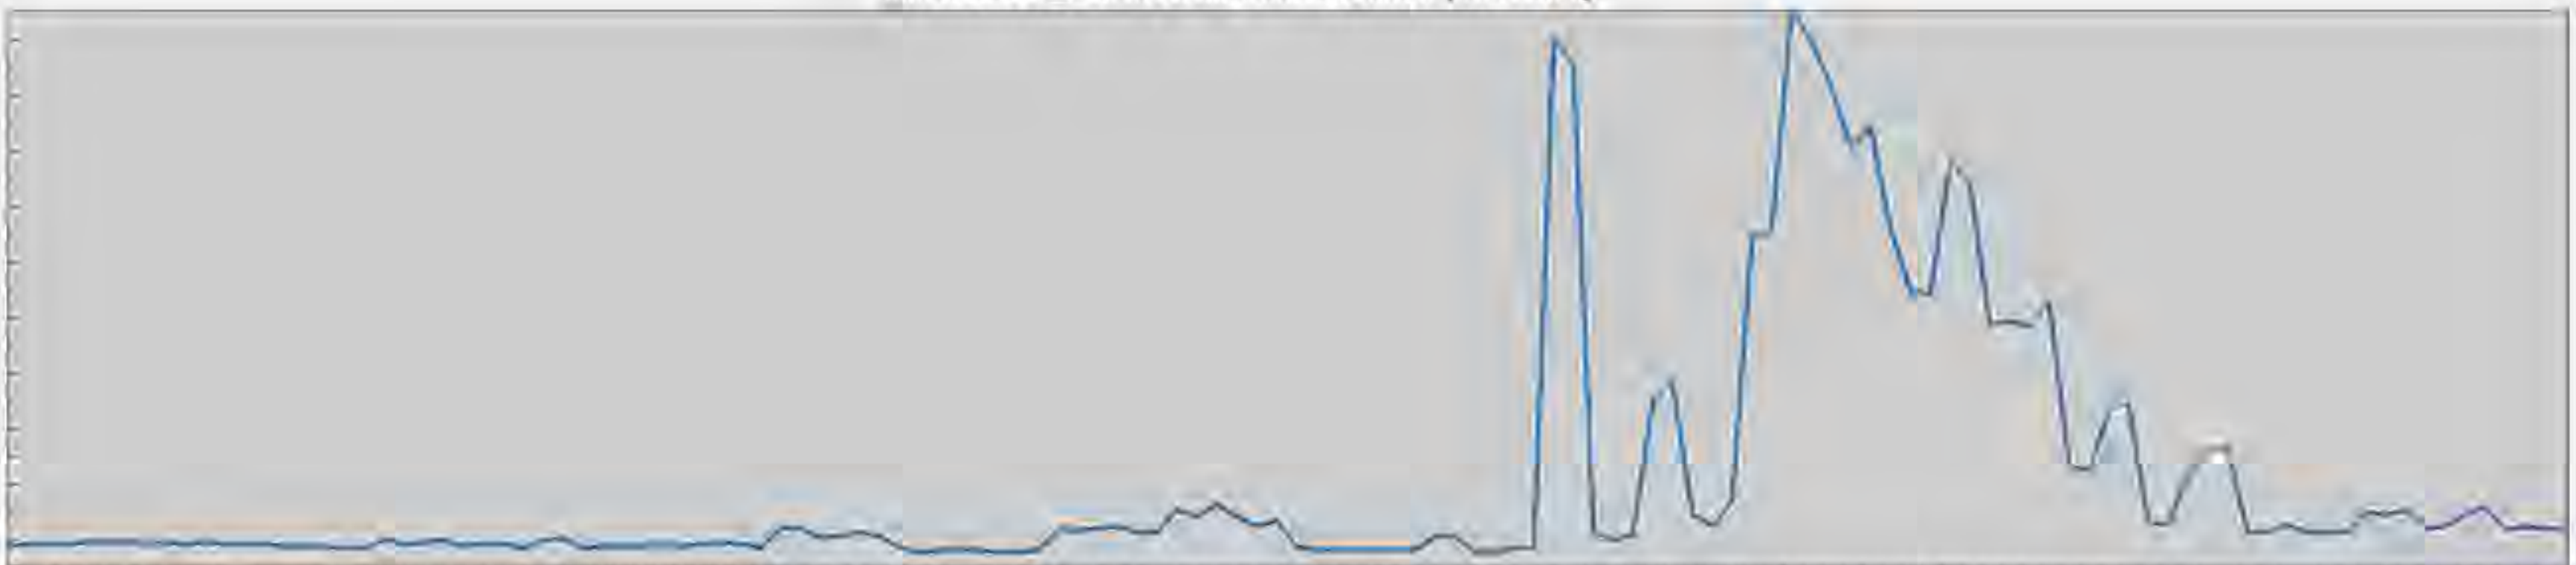

130-NALT GSM289411.CEL  
129-NALT GSM289410.CEL  
128-NALT GSM289409.CEL  
127-NALT GSM289408.CEL  
126-Colon-d9 GSM1988105.CEL  
125-Colon-d9 GSM1988104.CEL  
124-Colon-d9 GSM1988103.CEL  
123-Colon-d4 GSM1988102.CEL  
122-Colon-d4 GSM1988101.CEL  
121-Intestine-large GSM258676.CEL  
120-Intestine-large GSM258675.CEL  
119-Intestine-small GSM258678.CEL  
118-Intestine-small GSM258692.CEL  
117-Lymph-nodes GSM258691.CEL  
116-Lymph-nodes GSM258726.CEL  
115-Spleen GSM258767.CEL  
114-Spleen GSM258767.CEL  
113-Neuro2a GSM258727.CEL  
112-Neuro2a GSM241898.CEL  
111-Astrocytes GSM241898.CEL  
110-mim6 GSM258725.CEL  
109-mim6 GSM258725.CEL  
108-MIMCD3 GSM258724.CEL  
107-MIMCD3 GSM258723.CEL  
106-Bruce4 GSM258656.CEL  
105-Bruce4 GSM258656.CEL  
104-C2C12 GSM258690.CEL  
103-C2C12 GSM258629.CEL  
102-NH3T3 GSM258739.CEL  
101-NH3T3 GSM258739.CEL  
100-3T3-L1 GSM258610.CEL  
99-3T3-L1 GSM258609.CEL  
98-10T12 GSM258632.CEL  
97-10T12 GSM258631.CEL  
96-Osteoblast-d21 GSM258740.CEL  
95-Osteoblast-d21 GSM258739.CEL  
94-Osteoblast-d14 GSM258738.CEL  
93-Osteoblast-d14 GSM258737.CEL  
92-Osteoblast-d5 GSM258742.CEL  
91-Osteoblast-d5 GSM258741.CEL  
90-Chondrocytes GSM266741.CEL  
89-Chondrocytes GSM266740.CEL  
88-Nat Helper cell GSM465594.CEL  
87-Nat Helper cell GSM465593.CEL  
86-TT cell GSM465596.CEL  
85-MS-1 GSM234692.CEL  
84-Lymph-endo-cells GSM143704.CEL  
83-PP-FDC GSM481977.CEL  
82-PP-FDC GSM481978.CEL  
81-PP-FDC GSM481976.CEL  
80-L Y RMLNDCC003001.CEL  
79-L Y RMLNDCC003001.CEL  
78-Follicular-Bcells GSM258664.CEL  
77-Follicular-Bcells GSM258665.CEL  
76-MZ-Bcell GSM258627.CEL  
75-MZ-Bcell GSM258627.CEL  
74-BAF3 GSM258620.CEL  
73-BAF3 GSM258619.CEL  
72-Tregs GSM258778.CEL  
71-Tregs GSM258777.CEL  
70-T-cells-CD8+ GSM258776.CEL  
69-T-cells-CD8+ GSM258774.CEL  
68-T-cells-CD4+ GSM258773.CEL  
67-T-cells-CD4+ GSM258773.CEL  
66-Thymocyte-DN GSM465595.CEL  
65-Osteoclasts GSM258743.CEL  
64-Osteoclasts GSM258743.CEL  
63-Microglia GSM258721.CEL  
62-Microglia GSM258721.CEL  
61-PM-M-PS-7h GSM258706.CEL  
60-PM-M-PS-7h GSM258705.CEL  
59-PM-M-PS-7h GSM258702.CEL  
58-PM-M-PS-6h GSM258700.CEL  
57-PM-M-PS-6h GSM258699.CEL  
56-PM-M-PS-6h GSM258699.CEL  
55-PM-M-PS-6h GSM258699.CEL  
54-PM-M-PS-6h GSM258699.CEL  
53-PM-M-PS-6h GSM258699.CEL  
52-PM-M-PS-6h GSM258699.CEL  
51-PM-M-PS-6h GSM258699.CEL  
50-PM-M-PS-6h GSM258699.CEL  
49-PM-M-PS-6h GSM258699.CEL  
48-PM-M-PS-6h GSM258699.CEL  
47-NK-cells GSM258732.CEL  
46-NK-cells GSM258732.CEL  
45-Mast-cells-IgE+Ad GSM258718.CEL  
44-Mast-cells-IgE+Ad GSM258717.CEL  
43-Mast-cells-IgE GSM258714.CEL  
42-Mast-cells-IgE GSM258713.CEL  
41-Mast-cells GSM258712.CEL  
40-Mast-cells GSM258711.CEL  
39-Granulocytes GSM258668.CEL  
38-Granulocytes GSM258667.CEL  
37-GMP GSM258666.CEL  
36-GMP GSM258666.CEL  
35-GMP GSM258666.CEL  
34-GMP GSM258666.CEL  
33-MEP GSM258720.CEL  
32-MEP GSM258720.CEL  
31-MEP GSM258720.CEL  
30-HSC GSM258770.CEL  
29-Bone marrow GSM258628.CEL  
28-Bone marrow GSM258627.CEL  
27-paneth-cells-GE GSM116358.CEL  
26-paneth-cells-GE GSM116357.CEL  
25-paneth-cells GSM116350.CEL  
24-paneth-cells GSM116359.CEL  
23-paneth-cells GSM318589.CEL  
22-paneth-cells GSM318590.CEL  
21-Colon-Crypt GSM480375.CEL  
20-Colon-Crypt GSM480374.CEL  
19-Colon-Vill GSM480363.CEL  
18-Colon-Vill GSM480362.CEL  
17-Colon-IEC-GE GSM349880.CEL  
16-Colon-IEC-GE GSM350375.CEL  
15-Ileum-IEC-TGF GSM350376.CEL  
14-Ileum-IEC GSM350371.CEL  
13-Small-intestine-epithelium RMINEP002001.CEL  
12-Small-intestine-epithelium RMINEP001001.CEL  
11-FAE-RMPYEP002001.CEL  
10-FAE-RMPYEP001001.CEL  
09-Ileum-IEC GSM190797.CEL  
08-Ileum-IEC GSM190796.CEL  
07-Ileum-IEC GSM190795.CEL  
06-CT-v-M-cells GSM190794.CEL  
05-CT-v-M-cells GSM190793.CEL  
04-CT-v-M-cells GSM190792.CEL  
03-PP-M-cells GSM190791.CEL  
02-PP-M-cells GSM190790.CEL  
01-PP-M-cells GSM190789.CEL



Cluster0052\_Uncertain (42 nodes)

100.5  
95.2  
89.9  
84.6  
79.3  
74  
68.7  
63.5  
58.2  
52.9  
47.6  
42.3  
37  
31.7  
26.4  
21.2  
15.9  
10.6  
5.3  
0

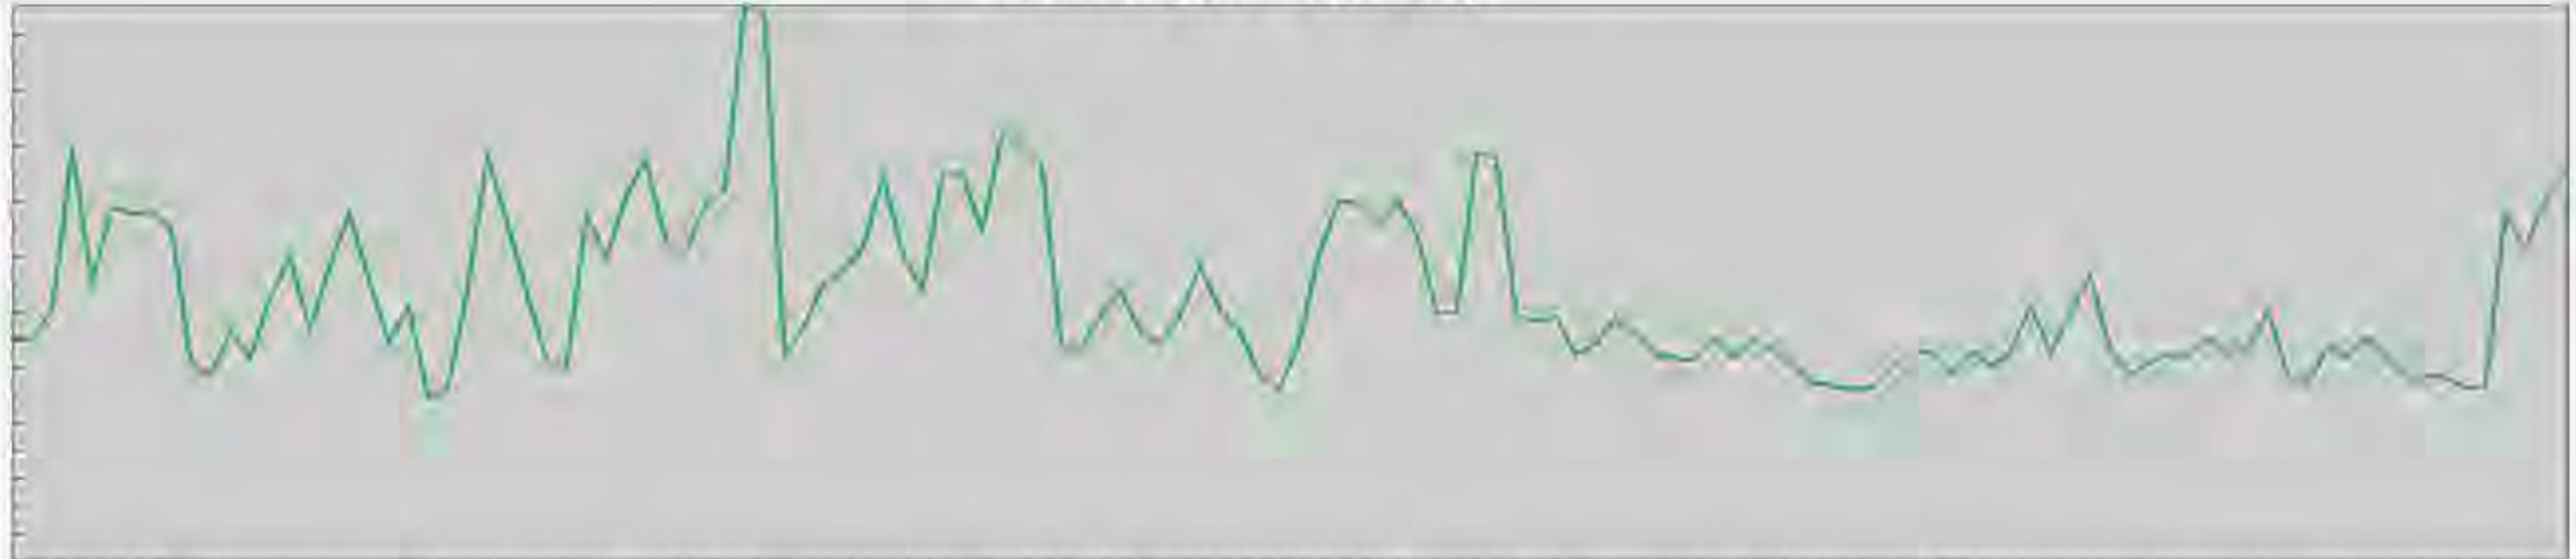

130-NALT GSM289411.CEL  
129-NALT GSM289410.CEL  
128-NALT GSM289409.CEL  
127-NALT GSM289408.CEL  
126-Column-d9 GSM1988105.CEL  
125-Column-d9 GSM1988104.CEL  
124-Column-d9 GSM1988103.CEL  
123-Column-d4 GSM1988102.CEL  
122-Column-d4 GSM1988101.CEL  
121-Intestine-large GSM258676.CEL  
120-Intestine-large GSM258675.CEL  
119-Intestine-small GSM258678.CEL  
118-Intestine-small GSM258677.CEL  
117-Lymph-nodes GSM258691.CEL  
116-Lymph-nodes GSM258692.CEL  
115-Spleen GSM258767.CEL  
114-Spleen GSM258768.CEL  
113-Neuro2a GSM258728.CEL  
112-Neuro2a GSM258727.CEL  
111-Astrocytes GSM241898.CEL  
110-mim6 GSM258726.CEL  
109-mim6 GSM258725.CEL  
108-MIMCD3 GSM258724.CEL  
107-MIMCD3 GSM258723.CEL  
106-Bruce4 GSM258656.CEL  
105-Bruce4 GSM258655.CEL  
104-C2C12 GSM258690.CEL  
103-C2C12 GSM258689.CEL  
102-NH3T3 GSM258739.CEL  
101-NH3T3 GSM258738.CEL  
100-3T3-L1 GSM258610.CEL  
99-3T3-L1 GSM258609.CEL  
98-10T12 GSM258631.CEL  
97-10T12 GSM258632.CEL  
96-Osteoblast-d21 GSM258740.CEL  
95-Osteoblast-d21 GSM258739.CEL  
94-Osteoblast-d14 GSM258738.CEL  
93-Osteoblast-d14 GSM258737.CEL  
92-Osteoblast-d5 GSM258742.CEL  
91-Osteoblast-d5 GSM258741.CEL  
90-Chondrocytes GSM266741.CEL  
89-Chondrocytes GSM266740.CEL  
88-Nat Helper cell GSM465594.CEL  
87-Nat Helper cell GSM465593.CEL  
86-LT cell GSM465596.CEL  
85-MS-1 GSM234692.CEL  
84-Lymph-endo-cells GSM143704.CEL  
83-PP-FDC GSM481977.CEL  
82-PP-FDC GSM481978.CEL  
81-PP-FDC GSM481976.CEL  
80-F-LY RMLNDCC003001.CEL  
79-F-LY RMLNDCC003001.CEL  
78-Follicular-Bcells GSM258664.CEL  
77-Follicular-Bcells GSM258665.CEL  
76-MZ-Bcell GSM258622.CEL  
75-MZ-Bcell GSM258621.CEL  
74-BAF3 GSM258620.CEL  
73-BAF3 GSM258619.CEL  
72-Tregs GSM258778.CEL  
71-Tregs GSM258777.CEL  
70-T-cells CD8+ GSM258776.CEL  
69-T-cells CD8+ GSM258775.CEL  
68-T-cells CD4+ GSM258774.CEL  
67-T-cells CD4+ GSM258773.CEL  
66-Thymocyte-DN GSM465595.CEL  
65-Osteoclasts GSM258744.CEL  
64-Microglia GSM258721.CEL  
63-Microglia GSM258721.CEL  
62-MM-LPS-7h GSM258706.CEL  
61-MM-LPS-7h GSM258705.CEL  
60-MM-LPS-6h GSM258702.CEL  
59-MM-LPS-6h GSM258701.CEL  
58-MM-LPS-6h GSM258699.CEL  
57-MM-LPS-6h GSM258699.CEL  
56-MM-LPS-6h GSM258694.CEL  
55-MM-LPS-6h GSM258694.CEL  
54-Plasmacytoid-DC GSM258650.CEL  
53-Plasmacytoid-DC GSM258649.CEL  
52-CD8a-DC GSM258647.CEL  
51-CD8a-DC GSM258647.CEL  
50-CD8a+DC GSM258646.CEL  
49-CD8a+DC GSM258645.CEL  
48-NK-cells GSM258732.CEL  
47-NK-cells GSM258731.CEL  
46-NK-cells GSM258731.CEL  
45-Mast-cells-IgE+Ad GSM258718.CEL  
44-Mast-cells-IgE+Ad GSM258717.CEL  
43-Mast-cells-IgE GSM258714.CEL  
42-Mast-cells-IgE GSM258713.CEL  
41-Mast-cells GSM258712.CEL  
40-Granulocytes GSM258667.CEL  
39-Granulocytes GSM258667.CEL  
38-GMP GSM258666.CEL  
37-GMP GSM258666.CEL  
36-GMP GSM258665.CEL  
35-GMP GSM258664.CEL  
34-MEP GSM258720.CEL  
33-MEP GSM258719.CEL  
32-MEP GSM258719.CEL  
31-HSC GSM258770.CEL  
30-HSC GSM258769.CEL  
29-Bone marrow GSM258628.CEL  
28-Bone marrow GSM258627.CEL  
27-Paneth-cells-GF-1 GSM116357.CEL  
26-Paneth-cells-GF-1 GSM116350.CEL  
25-Paneth-cells GSM116350.CEL  
24-Paneth-cells GSM116359.CEL  
23-Paneth-cells GSM318589.CEL  
22-Paneth-cells GSM318590.CEL  
21-Column-Crypt GSM480375.CEL  
20-Column-Crypt GSM480374.CEL  
19-Column-Vill GSM480363.CEL  
18-Column-Vill GSM480362.CEL  
17-Column-IEC-GF GSM349880.CEL  
16-Column-IEC-GF GSM350375.CEL  
15-Ileum-IEC-GF GSM350376.CEL  
14-Ileum-IEC GSM350371.CEL  
13-Small-intestine-epithelium RMINEP002001.CEL  
12-Small-intestine-epithelium RMINEP001001.CEL  
11-FAE-RMPYEP002001.CEL  
10-FAE-RMPYEP001001.CEL  
09-Ileum-IEC GSM190797.CEL  
08-Ileum-IEC GSM190796.CEL  
07-Ileum-IEC GSM190795.CEL  
06-CT-v-M-cells GSM190794.CEL  
05-CT-v-M-cells GSM190793.CEL  
04-PP-M-cells GSM190792.CEL  
03-PP-M-cells GSM190791.CEL  
02-PP-M-cells GSM190790.CEL  
01-PP-M-cells GSM190789.CEL



Cluster0053\_Uncertain (42 nodes)

111.2  
105.3  
99.5  
93.6  
87.8  
81.9  
76.1  
70.2  
64.4  
58.5  
52.7  
46.8  
41  
35.1  
29.3  
23.4  
17.6  
11.7  
5.9  
0

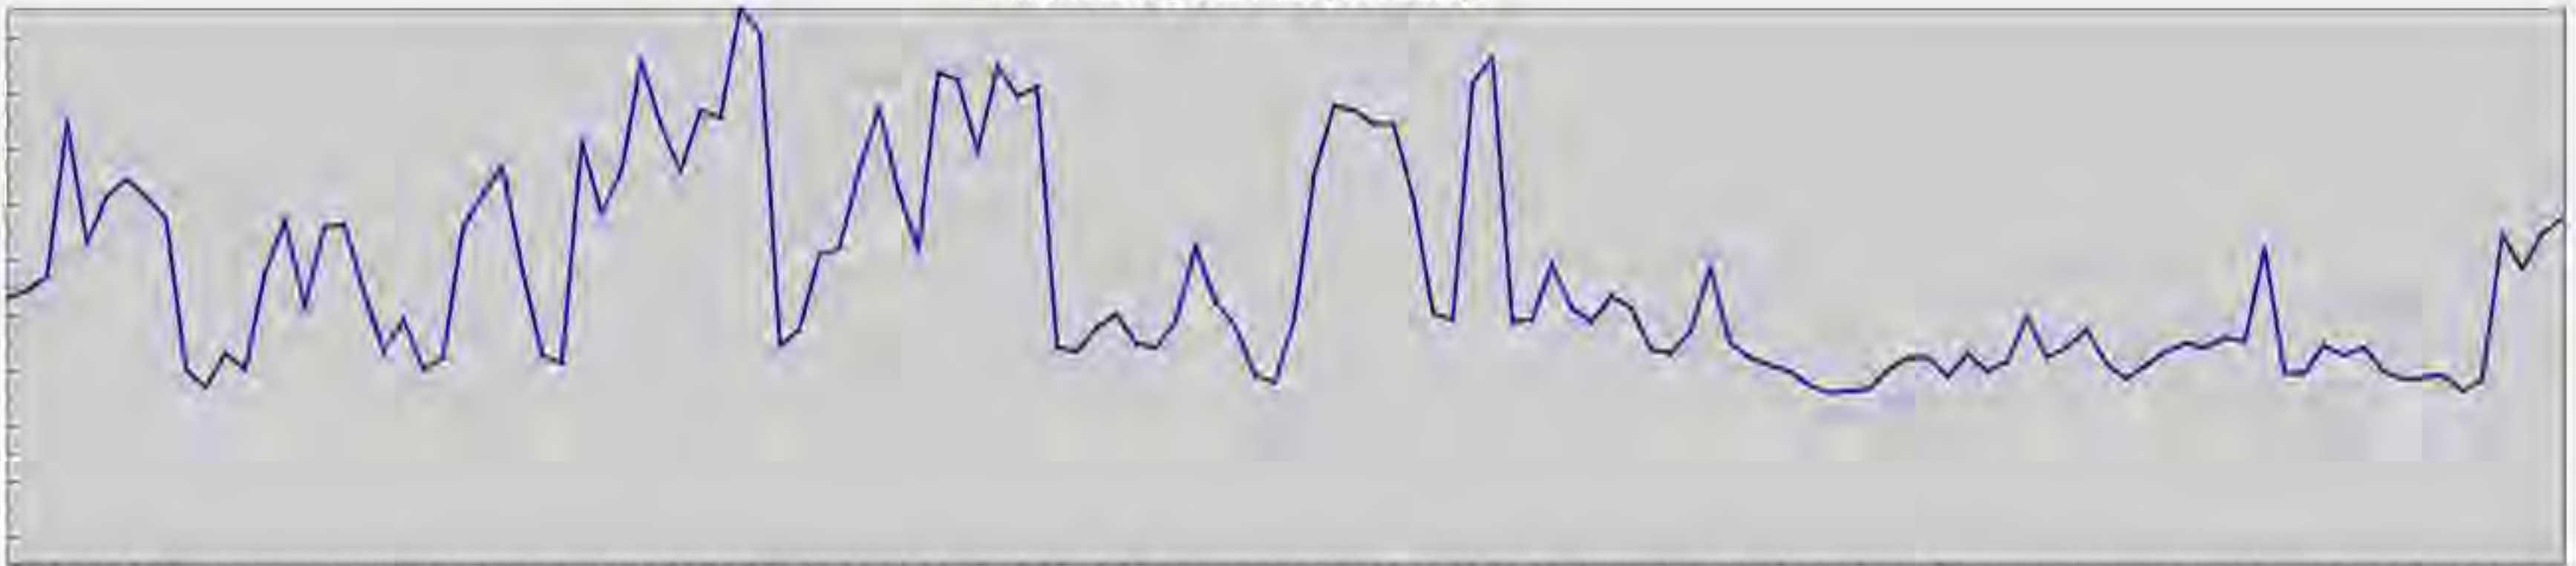

130-NALT GSM289411.CEL  
129-NALT GSM289410.CEL  
128-NALT GSM289409.CEL  
127-NALT GSM289408.CEL  
126-Colon-d9 GSM1988105.CEL  
125-Colon-d9 GSM1988104.CEL  
124-Colon-d9 GSM1988103.CEL  
123-Colon-d4 GSM1988102.CEL  
122-Colon-d4 GSM1988101.CEL  
121-Intestine-large GSM258676.CEL  
120-Intestine-large GSM258675.CEL  
119-Intestine-small GSM258678.CEL  
118-Intestine-small GSM258677.CEL  
117-Lymph-nodes GSM258691.CEL  
116-Lymph-nodes GSM258692.CEL  
115-Spleen GSM258767.CEL  
114-Spleen GSM258767.CEL  
113-Neuro2a GSM258728.CEL  
112-Neuro2a GSM258727.CEL  
111-Astrocytes GSM241898.CEL  
110-ming GSM258726.CEL  
109-ming GSM258725.CEL  
108-MIMCD3 GSM258724.CEL  
107-MIMCD3 GSM258723.CEL  
106-Bruce4 GSM258656.CEL  
105-Bruce4 GSM258656.CEL  
104-C2C12 GSM258690.CEL  
103-C2C12 GSM258629.CEL  
102-NH3T3 GSM258739.CEL  
101-NH3T3 GSM258739.CEL  
100-3T3-L1 GSM258610.CEL  
99-3T3-L1 GSM258609.CEL  
99-10T12 GSM258631.CEL  
98-10T12 GSM258631.CEL  
97-Osteoblast-d21 GSM258740.CEL  
96-Osteoblast-d21 GSM258739.CEL  
95-Osteoblast-d14 GSM258738.CEL  
94-Osteoblast-d14 GSM258737.CEL  
93-Osteoblast-d5 GSM258742.CEL  
92-Osteoblast-d5 GSM258741.CEL  
91-Chondrocytes GSM266741.CEL  
90-Chondrocytes GSM266740.CEL  
89-Nat Helper cell GSM465594.CEL  
88-Nat Helper cell GSM465593.CEL  
87-LT cell GSM465596.CEL  
86-LT cell GSM465596.CEL  
85-MS-1 GSM234692.CEL  
84-Lymph-endo-cells GSM143704.CEL  
83-PP-FDC GSM481977.CEL  
82-PP-FDC GSM481978.CEL  
81-PP-FDC GSM481976.CEL  
80-F-LY RMLNDCC003001.CEL  
79-F-LY RMLNDCC003001.CEL  
78-Follicular-Bcells GSM258664.CEL  
77-Follicular-Bcells GSM258627.CEL  
76-MZ-Bcell GSM258627.CEL  
75-MZ-Bcell GSM258627.CEL  
74-BAF3 GSM258620.CEL  
73-BAF3 GSM258619.CEL  
72-Tregs GSM258778.CEL  
71-Tregs GSM258777.CEL  
70-T-cells-CD8+ GSM258776.CEL  
69-T-cells-CD8+ GSM258774.CEL  
68-T-cells-CD4+ GSM258773.CEL  
67-T-cells-CD4+ GSM258773.CEL  
66-Thymocyte-DN GSM465595.CEL  
65-Osteoclasts GSM258743.CEL  
64-Osteoclasts GSM258743.CEL  
63-Microglia GSM258721.CEL  
62-Microglia GSM258721.CEL  
61-PM-M-PS-7h GSM258706.CEL  
60-PM-M-PS-7h GSM258705.CEL  
59-PM-M-PS-7h GSM258702.CEL  
58-PM-M-PS-6h GSM258700.CEL  
57-PM-M-PS-6h GSM258699.CEL  
56-PM-M-PS-6h GSM258699.CEL  
55-BMM GSM258694.CEL  
54-BMM GSM258694.CEL  
53-Plasmacytoid-DC GSM258650.CEL  
52-Plasmacytoid-DC GSM258649.CEL  
51-CD8a-DC GSM258647.CEL  
50-CD8a-DC GSM258647.CEL  
49-CD8a+DC GSM258646.CEL  
48-CD8a+DC GSM258646.CEL  
47-NK-cells GSM258732.CEL  
46-NK-cells GSM258731.CEL  
45-Mast-cells-IgE+Ad GSM258718.CEL  
44-Mast-cells-IgE+Ad GSM258717.CEL  
43-Mast-cells-IgE GSM258714.CEL  
42-Mast-cells-IgE GSM258713.CEL  
41-Mast-cells GSM258712.CEL  
40-Granulocytes GSM258711.CEL  
39-Granulocytes GSM258667.CEL  
38-GMP GSM258666.CEL  
37-GMP GSM258666.CEL  
36-GMP GSM258666.CEL  
35-CMP GSM258642.CEL  
34-CMP GSM258642.CEL  
33-MEP GSM258720.CEL  
32-MEP GSM258719.CEL  
31-HESC GSM258770.CEL  
30-HESC GSM258770.CEL  
29-Bone marrow GSM258628.CEL  
28-Bone marrow GSM258627.CEL  
27-paneth-cells-GE GSM116358.CEL  
26-paneth-cells-GE GSM116357.CEL  
25-paneth-cells GSM116350.CEL  
24-paneth-cells GSM116359.CEL  
23-paneth-cells GSM318589.CEL  
22-paneth-cells GSM318590.CEL  
21-Colon-Crypt GSM480375.CEL  
20-Colon-Crypt GSM480374.CEL  
19-Colon-Vill GSM480363.CEL  
18-Colon-Vill GSM480362.CEL  
17-Colon-IEC-GE GSM349880.CEL  
16-Colon-IEC-GE GSM350375.CEL  
15-Ileum-IEC-TGF GSM350376.CEL  
14-Ileum-IEC GSM350371.CEL  
13-Small-intestine-epithelium RMINEP002001.CEL  
12-Small-intestine-epithelium RMINEP001001.CEL  
11-FAE-RMPYEP002001.CEL  
10-FAE-RMPYEP001001.CEL  
09-Ileum-IEC GSM190797.CEL  
08-Ileum-IEC GSM190796.CEL  
07-Ileum-IEC GSM190795.CEL  
06-CT-v-M-cells GSM190794.CEL  
05-CT-v-M-cells GSM190793.CEL  
04-PP-M-cells GSM190792.CEL  
03-PP-M-cells GSM190791.CEL  
02-PP-M-cells GSM190790.CEL  
01-PP-M-cells GSM190789.CEL



Cluster0054\_House keeping-nucleus (40 nodes)

1,315.9  
1,246.6  
1,177.4  
1,108.1  
1,038.9  
969.6  
900.3  
831.1  
761.8  
692.6  
623.3  
554.1  
484.8  
415.5  
346.3  
277  
207.8  
138.5  
69.3  
0

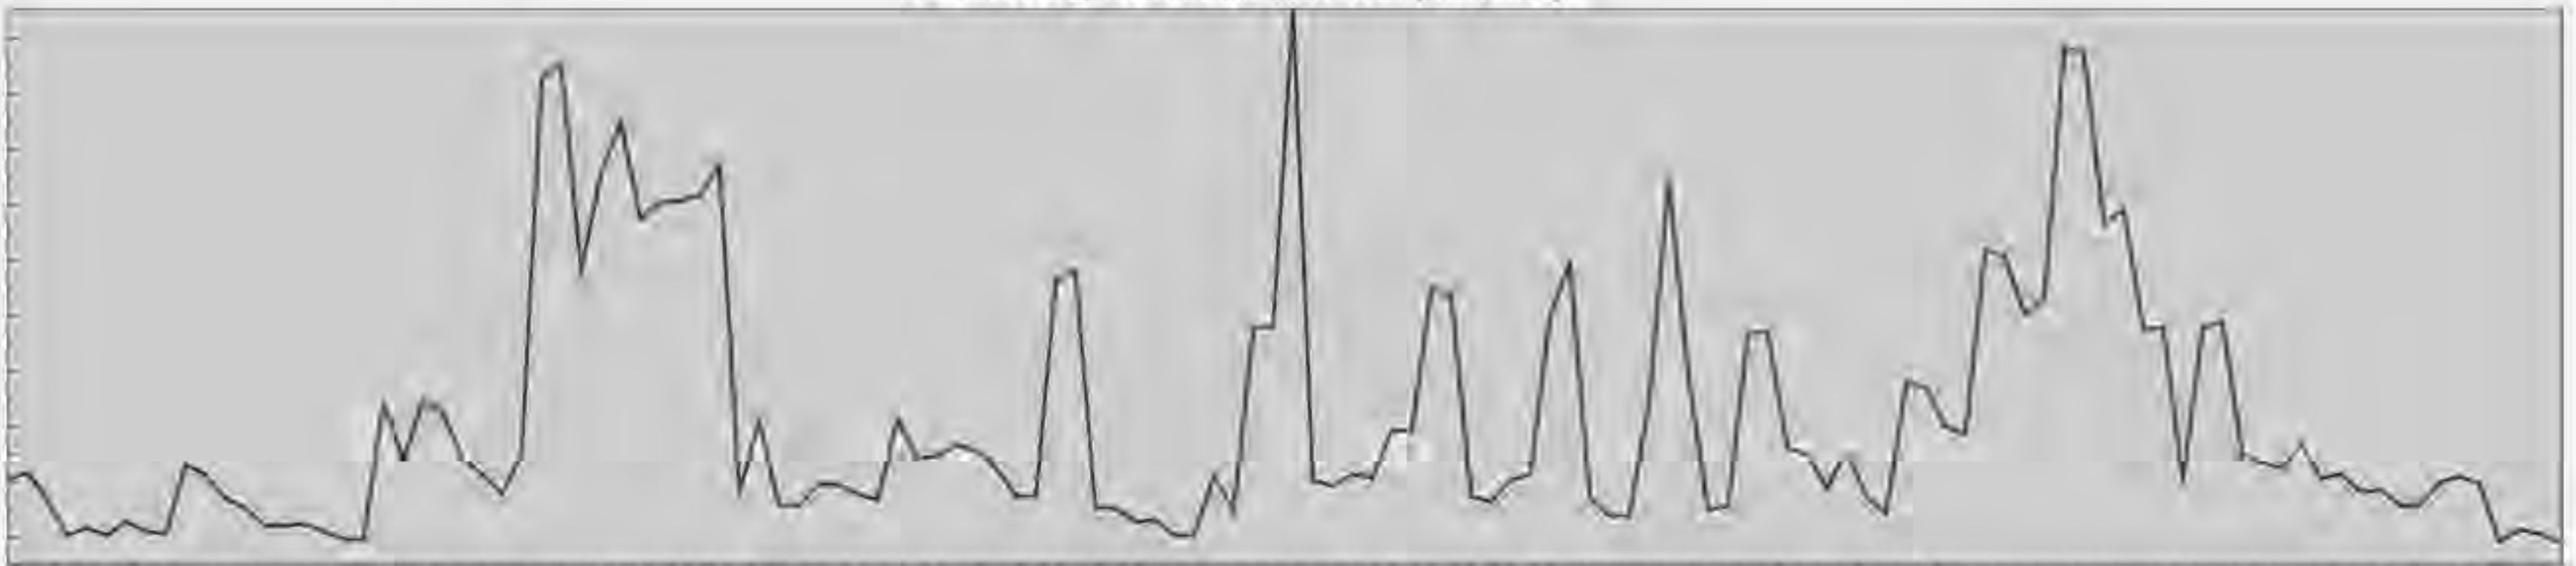

0 PP-M-cells GSM190789.CEL  
1 PP-M-cells GSM190790.CEL  
2 PP-M-cells GSM190791.CEL  
3 PP-M-cells GSM190792.CEL  
4 CT-V-M-cells GSM190793.CEL  
5 CT-V-M-cells GSM190794.CEL  
6 CT-V-M-cells GSM190795.CEL  
7 Ileum-IEC GSM190796.CEL  
8 Ileum-IEC GSM190797.CEL  
9 Ileum-IEC GSM190798.CEL  
10 FAE-RMPYEP001001.CEL  
11 FAE-RMPYEP002001.CEL  
12 SmallIntestine-epithelium\_RMINEP001001.CEL  
13 SmallIntestine-epithelium\_RMINEP002001.CEL  
14 Ileum-IEC GSM350371.CEL  
15 Colon-IEC-Gf GSM350375.CEL  
16 Colon-VIII GSM480362.CEL  
17 Colon-VIII GSM480363.CEL  
18 Colon-VIII GSM480364.CEL  
19 Colon-Crypt GSM480374.CEL  
20 Colon-Crypt GSM480375.CEL  
21 Paneth-cells GSM480376.CEL  
22 Paneth-cells GSM318589.CEL  
23 Paneth-cells GSM318590.CEL  
24 Paneth-cells GSM116350.CEL  
25 Paneth-cells GSM116351.CEL  
26 Paneth-cells-Gf GSM116357.CEL  
27 Paneth-cells-Gf GSM116358.CEL  
28 Bone marrow GSM258627.CEL  
29 Bone marrow GSM258628.CEL  
30 HSC GSM258770.CEL  
31 HSC GSM258771.CEL  
32 MIEP GSM258772.CEL  
33 MIEP GSM258773.CEL  
34 MIEP GSM258774.CEL  
35 MIEP GSM258775.CEL  
36 MIEP GSM258776.CEL  
37 MIEP GSM258777.CEL  
38 Granulocytes GSM258667.CEL  
39 Granulocytes GSM258668.CEL  
40 Mast-cells GSM258712.CEL  
41 Mast-cells GSM258713.CEL  
42 Mast-cells-Gf GSM258714.CEL  
43 Mast-cells-Gf GSM258715.CEL  
44 Mast-cells-IgE+Ad GSM258719.CEL  
45 Mast-cells-IgE+Ad GSM258720.CEL  
46 NK-cells GSM258731.CEL  
47 NK-cells GSM258732.CEL  
48 CD8a+DC GSM258646.CEL  
49 CD8a+DC GSM258647.CEL  
50 CD8a-DC GSM258647.CEL  
51 CD8a-DC GSM258647.CEL  
52 Plasmacytoid-DC GSM258649.CEL  
53 Plasmacytoid-DC GSM258649.CEL  
54 BMM-GSM258694.CEL  
55 BMM-GSM258694.CEL  
56 BMM-LPS-Gf GSM258700.CEL  
57 BMM-LPS-Gf GSM258700.CEL  
58 P-MM-LPS-7h GSM258702.CEL  
59 P-MM-LPS-7h GSM258702.CEL  
60 P-MM-LPS-7h GSM258706.CEL  
61 P-MM-LPS-7h GSM258706.CEL  
62 Microglia GSM258721.CEL  
63 Microglia GSM258721.CEL  
64 Osteoclasts GSM258743.CEL  
65 Osteoclasts GSM258744.CEL  
66 Thymocyte-DN GSM465595.CEL  
67 T-cells-CD4+ GSM258773.CEL  
68 T-cells-CD4+ GSM258773.CEL  
69 T-cells-CD8+ GSM258774.CEL  
70 T-cells-CD8+ GSM258774.CEL  
71 Tregs GSM258778.CEL  
72 Tregs GSM258778.CEL  
73 BAF3 GSM258619.CEL  
74 BAF3 GSM258620.CEL  
75 MZ-Bcell GSM258621.CEL  
76 MZ-Bcell GSM258621.CEL  
77 Follicular-Bcells GSM258664.CEL  
78 Follicular-Bcells GSM258664.CEL  
79 E-L-Y-RMLNDC002001.CEL  
80 E-L-Y-RMLNDC003001.CEL  
81 PP-FDC GSM481976.CEL  
82 PP-FDC GSM481978.CEL  
83 PP-FDC GSM481977.CEL  
84 Lymph-endo-cells GSM143704.CEL  
85 MS-1 GSM234692.CEL  
86 Tt cell GSM465596.CEL  
87 Nat Helper cell GSM465593.CEL  
88 Nat Helper cell GSM465594.CEL  
89 Chondrocytes GSM266741.CEL  
90 Chondrocytes GSM266741.CEL  
91 Osteoblast-d5 GSM258741.CEL  
92 Osteoblast-d5 GSM258742.CEL  
93 Osteoblast-d14 GSM258737.CEL  
94 Osteoblast-d14 GSM258738.CEL  
95 Osteoblast-d21 GSM258740.CEL  
96 Osteoblast-d21 GSM258739.CEL  
97 OT12 GSM258631.CEL  
98 OT12 GSM258632.CEL  
99 T3-L1 GSM258609.CEL  
100 T3-L1 GSM258610.CEL  
101 NH3T3 GSM258729.CEL  
102 NH3T3 GSM258730.CEL  
103 C2C12 GSM258829.CEL  
104 C2C12 GSM258830.CEL  
105 Bruce4 GSM258866.CEL  
106 Bruce4 GSM258866.CEL  
107 MIMCD3 GSM258723.CEL  
108 MIMCD3 GSM258723.CEL  
109 mimb-GSM258725.CEL  
110 mimb-GSM258726.CEL  
111 Astrocytes GSM241898.CEL  
112 Astrocytes GSM241898.CEL  
113 Spleen GSM258767.CEL  
114 Spleen GSM258767.CEL  
115 Spleen GSM258768.CEL  
116 Spleen GSM258768.CEL  
117 Lymph-nodes GSM258691.CEL  
118 Lymph-nodes GSM258692.CEL  
119 Intestine-small GSM258677.CEL  
120 Intestine-large GSM258677.CEL  
121 Intestine-large GSM258676.CEL  
122 Intestine-large GSM258675.CEL  
123 Colon-d4 GSM198810.CEL  
124 Colon-d4 GSM198810.CEL  
125 Colon-d9 GSM198810.CEL  
126 Colon-d9 GSM198810.CEL  
127 NALT GSM289408.CEL  
128 NALT GSM289409.CEL  
129 NALT GSM289410.CEL  
130 NALT GSM289411.CEL



Cluster0055\_Intestinal chemosensory- and neuroendocrine cell-related (38 nodes)

1,206.2  
1,142.7  
1,079.2  
1,015.7  
952.2  
888.8  
826.3  
761.8  
698.3  
634.8  
571.3  
507.9  
444.4  
380.9  
317.4  
253.9  
190.4  
127  
63.5  
0

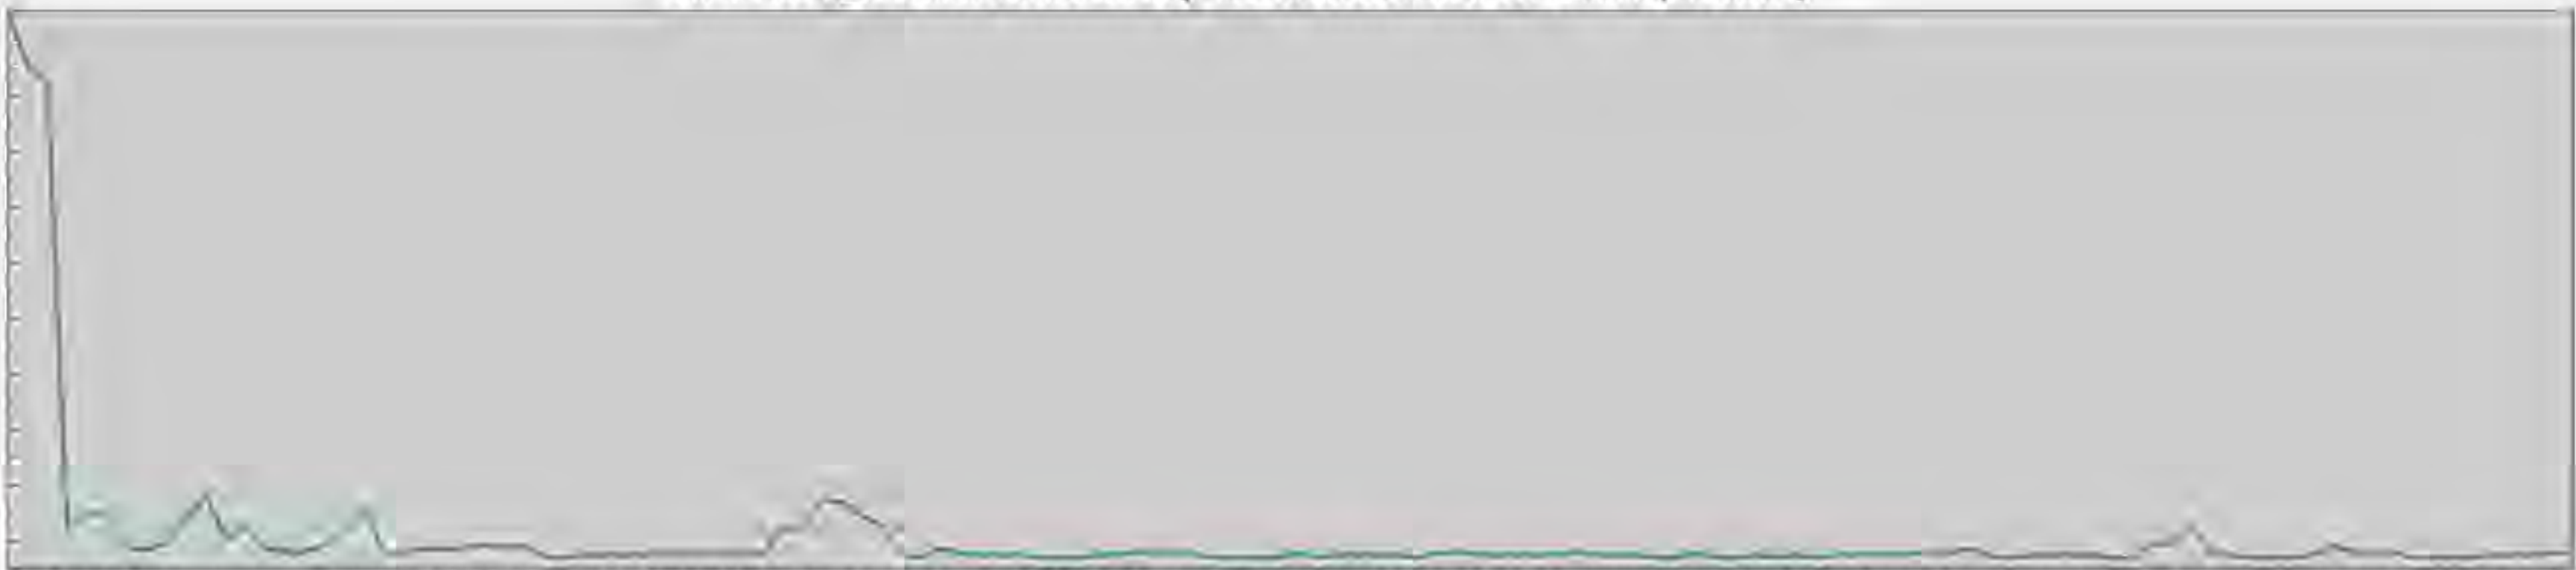

|     |                            |              |     |
|-----|----------------------------|--------------|-----|
| 01  | PP-M-cells                 | GSM190789    | CEL |
| 02  | PP-M-cells                 | GSM190790    | CEL |
| 03  | PP-M-cells                 | GSM190791    | CEL |
| 04  | CT-Y-M-cells               | GSM190792    | CEL |
| 05  | CT-Y-M-cells               | GSM190793    | CEL |
| 06  | CT-W-M-cells               | GSM190794    | CEL |
| 07  | Ileum-IEC                  | GSM190795    | CEL |
| 08  | Ileum-IEC                  | GSM190796    | CEL |
| 09  | Ileum-IEC                  | GSM190797    | CEL |
| 10  | FAE-RMP                    | GSM190798    | CEL |
| 11  | FAE-RMP                    | GSM190799    | CEL |
| 12  | Small-intestine-epithelium | RMINEP001001 | CEL |
| 13  | Small-intestine-epithelium | RMINEP002001 | CEL |
| 14  | Ileum-IEC                  | GSM350371    | CEL |
| 15  | Colon-IEC                  | GSM350375    | CEL |
| 16  | Colon-Vill                 | GSM480362    | cel |
| 17  | Colon-Vill                 | GSM480363    | cel |
| 18  | Colon-Vill                 | GSM480364    | cel |
| 19  | Colon-Crypt                | GSM480374    | cel |
| 20  | Colon-Crypt                | GSM480375    | cel |
| 21  | Colon-Crypt                | GSM480376    | cel |
| 22  | Paneth-cells               | GSM318589    | CEL |
| 23  | Paneth-cells               | GSM318590    | CEL |
| 24  | Paneth-cells               | GSM116359    | CEL |
| 25  | Paneth-cells               | GSM116359    | CEL |
| 26  | Paneth-cells               | GSM116357    | CEL |
| 27  | Paneth-cells               | GSM116358    | CEL |
| 28  | Bone marrow                | GSM258627    | CEL |
| 29  | Bone marrow                | GSM258628    | CEL |
| 30  | NALT                       | GSM289411    | CEL |
| 31  | NALT                       | GSM289410    | CEL |
| 32  | NALT                       | GSM289409    | CEL |
| 33  | NALT                       | GSM289408    | CEL |
| 34  | Colon-d9                   | GSM198810    | CEL |
| 35  | Colon-d9                   | GSM198810    | CEL |
| 36  | Colon-d9                   | GSM198810    | CEL |
| 37  | Colon-d4                   | GSM198810    | CEL |
| 38  | Colon-d4                   | GSM198810    | CEL |
| 39  | Intestine-large            | GSM258676    | CEL |
| 40  | Intestine-large            | GSM258677    | CEL |
| 41  | Intestine-small            | GSM258678    | CEL |
| 42  | Intestine-small            | GSM258679    | CEL |
| 43  | Lymph-nodes                | GSM258680    | CEL |
| 44  | Lymph-nodes                | GSM258681    | CEL |
| 45  | Spleen                     | GSM258682    | CEL |
| 46  | Spleen                     | GSM258683    | CEL |
| 47  | Neuro2a                    | GSM241898    | CEL |
| 48  | Neuro2a                    | GSM241898    | CEL |
| 49  | Astrocytes                 | GSM241898    | CEL |
| 50  | mim6                       | GSM258726    | CEL |
| 51  | mim6                       | GSM258727    | CEL |
| 52  | mim6                       | GSM258728    | CEL |
| 53  | MIMCD3                     | GSM258729    | CEL |
| 54  | MIMCD3                     | GSM258730    | CEL |
| 55  | MIMCD3                     | GSM258731    | CEL |
| 56  | MIMCD3                     | GSM258732    | CEL |
| 57  | MIMCD3                     | GSM258733    | CEL |
| 58  | MIMCD3                     | GSM258734    | CEL |
| 59  | MIMCD3                     | GSM258735    | CEL |
| 60  | MIMCD3                     | GSM258736    | CEL |
| 61  | MIMCD3                     | GSM258737    | CEL |
| 62  | MIMCD3                     | GSM258738    | CEL |
| 63  | MIMCD3                     | GSM258739    | CEL |
| 64  | MIMCD3                     | GSM258740    | CEL |
| 65  | MIMCD3                     | GSM258741    | CEL |
| 66  | MIMCD3                     | GSM258742    | CEL |
| 67  | MIMCD3                     | GSM258743    | CEL |
| 68  | MIMCD3                     | GSM258744    | CEL |
| 69  | MIMCD3                     | GSM258745    | CEL |
| 70  | MIMCD3                     | GSM258746    | CEL |
| 71  | MIMCD3                     | GSM258747    | CEL |
| 72  | MIMCD3                     | GSM258748    | CEL |
| 73  | MIMCD3                     | GSM258749    | CEL |
| 74  | MIMCD3                     | GSM258750    | CEL |
| 75  | MIMCD3                     | GSM258751    | CEL |
| 76  | MIMCD3                     | GSM258752    | CEL |
| 77  | MIMCD3                     | GSM258753    | CEL |
| 78  | MIMCD3                     | GSM258754    | CEL |
| 79  | MIMCD3                     | GSM258755    | CEL |
| 80  | MIMCD3                     | GSM258756    | CEL |
| 81  | MIMCD3                     | GSM258757    | CEL |
| 82  | MIMCD3                     | GSM258758    | CEL |
| 83  | MIMCD3                     | GSM258759    | CEL |
| 84  | MIMCD3                     | GSM258760    | CEL |
| 85  | MIMCD3                     | GSM258761    | CEL |
| 86  | MIMCD3                     | GSM258762    | CEL |
| 87  | MIMCD3                     | GSM258763    | CEL |
| 88  | MIMCD3                     | GSM258764    | CEL |
| 89  | MIMCD3                     | GSM258765    | CEL |
| 90  | MIMCD3                     | GSM258766    | CEL |
| 91  | MIMCD3                     | GSM258767    | CEL |
| 92  | MIMCD3                     | GSM258768    | CEL |
| 93  | MIMCD3                     | GSM258769    | CEL |
| 94  | MIMCD3                     | GSM258770    | CEL |
| 95  | MIMCD3                     | GSM258771    | CEL |
| 96  | MIMCD3                     | GSM258772    | CEL |
| 97  | MIMCD3                     | GSM258773    | CEL |
| 98  | MIMCD3                     | GSM258774    | CEL |
| 99  | MIMCD3                     | GSM258775    | CEL |
| 100 | MIMCD3                     | GSM258776    | CEL |
| 101 | MIMCD3                     | GSM258777    | CEL |
| 102 | MIMCD3                     | GSM258778    | CEL |
| 103 | MIMCD3                     | GSM258779    | CEL |
| 104 | MIMCD3                     | GSM258780    | CEL |
| 105 | MIMCD3                     | GSM258781    | CEL |
| 106 | MIMCD3                     | GSM258782    | CEL |
| 107 | MIMCD3                     | GSM258783    | CEL |
| 108 | MIMCD3                     | GSM258784    | CEL |
| 109 | MIMCD3                     | GSM258785    | CEL |
| 110 | MIMCD3                     | GSM258786    | CEL |
| 111 | MIMCD3                     | GSM258787    | CEL |
| 112 | MIMCD3                     | GSM258788    | CEL |
| 113 | MIMCD3                     | GSM258789    | CEL |
| 114 | MIMCD3                     | GSM258790    | CEL |
| 115 | MIMCD3                     | GSM258791    | CEL |
| 116 | MIMCD3                     | GSM258792    | CEL |
| 117 | MIMCD3                     | GSM258793    | CEL |
| 118 | MIMCD3                     | GSM258794    | CEL |
| 119 | MIMCD3                     | GSM258795    | CEL |
| 120 | MIMCD3                     | GSM258796    | CEL |
| 121 | MIMCD3                     | GSM258797    | CEL |
| 122 | MIMCD3                     | GSM258798    | CEL |
| 123 | MIMCD3                     | GSM258799    | CEL |
| 124 | MIMCD3                     | GSM258800    | CEL |
| 125 | MIMCD3                     | GSM258801    | CEL |
| 126 | MIMCD3                     | GSM258802    | CEL |
| 127 | MIMCD3                     | GSM258803    | CEL |
| 128 | MIMCD3                     | GSM258804    | CEL |
| 129 | MIMCD3                     | GSM258805    | CEL |
| 130 | MIMCD3                     | GSM258806    | CEL |



Cluster0056\_High in B cells (37 nodes)

345.5  
327.4  
309.2  
291  
272.8  
254.6  
236.4  
218.2  
200.1  
181.9  
163.7  
145.5  
127.3  
109.1  
90.9  
72.7  
54.6  
36.4  
18.2  
0

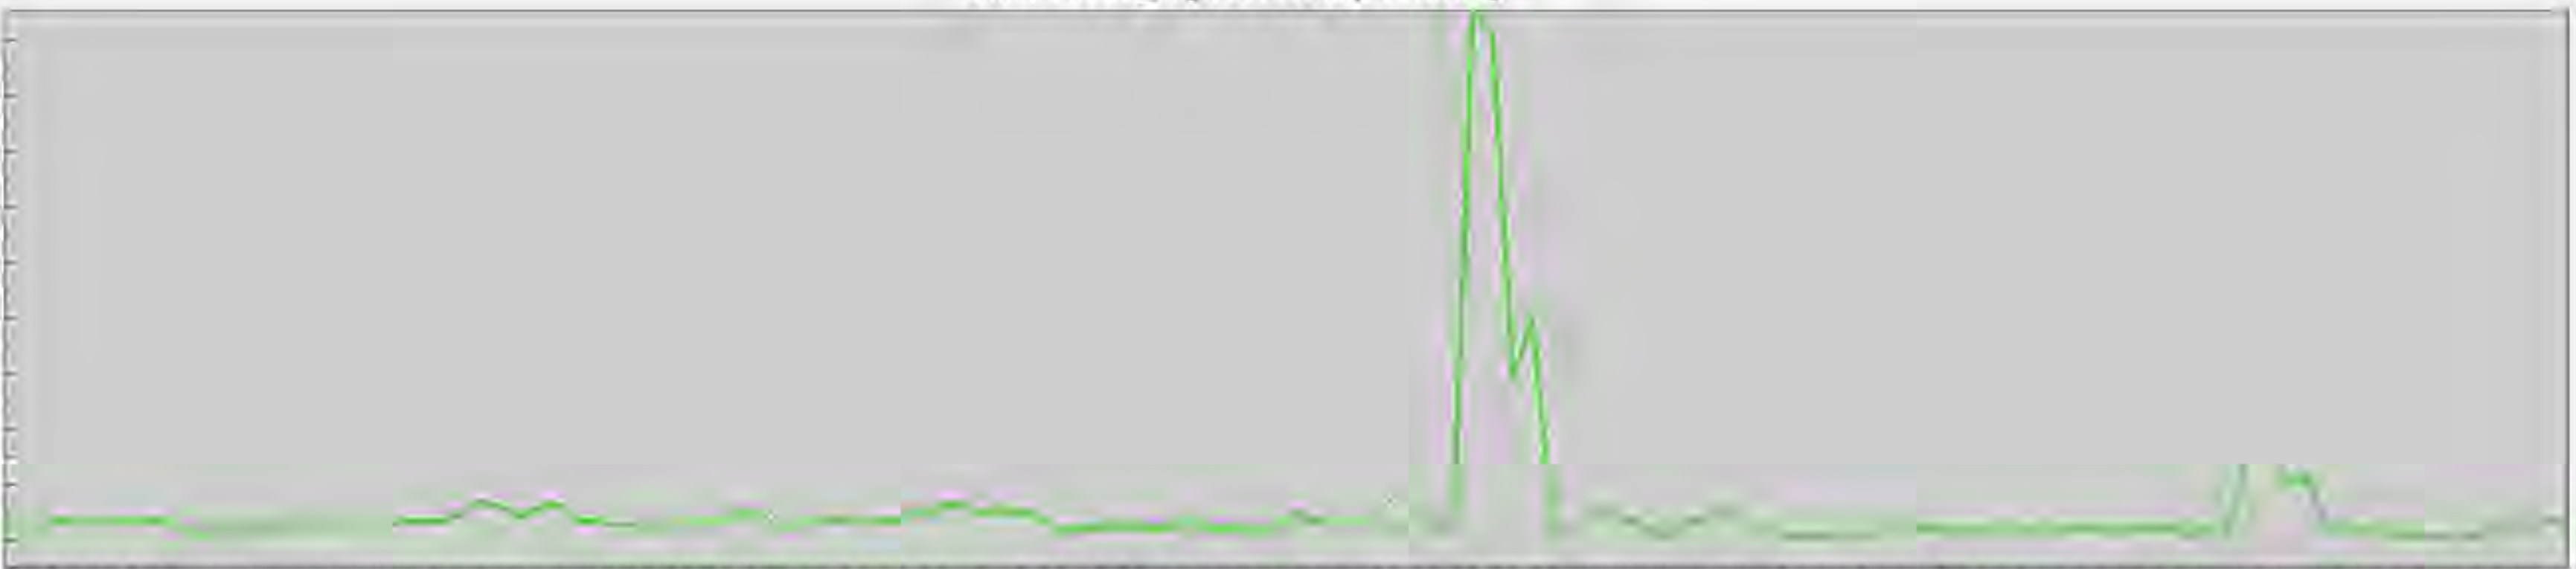

130-NALT GSM289411 CEL  
 129-NALT GSM289410 CEL  
 128-NALT GSM289409 CEL  
 127-NALT GSM289408 CEL  
 126-Colon-d9 GSM1988105 CEL  
 125-Colon-d9 GSM1988104 CEL  
 124-Colon-d9 GSM1988103 CEL  
 123-Colon-d4 GSM1988102 CEL  
 122-Colon-d4 GSM1988101 CEL  
 121-Intestine-large GSM258676 CEL  
 120-Intestine-large GSM258675 CEL  
 119-Intestine-small GSM258674 CEL  
 118-Intestine-small GSM258673 CEL  
 117-Lymph-nodes GSM258672 CEL  
 116-Lymph-nodes GSM258671 CEL  
 115-Spleen GSM258767 CEL  
 114-Spleen GSM258766 CEL  
 113-Neuro2a GSM258727 CEL  
 112-Neuro2a GSM258726 CEL  
 111-Astrocytes GSM241898 CEL  
 110-mim6 GSM258725 CEL  
 109-mim6 GSM258724 CEL  
 108-MIMCD3 GSM258723 CEL  
 107-MIMCD3 GSM258722 CEL  
 106-Bruce4 GSM258665 CEL  
 105-Bruce4 GSM258664 CEL  
 104-C2C12 GSM258690 CEL  
 103-C2C12 GSM258689 CEL  
 102-NH3T3 GSM258730 CEL  
 101-NH3T3 GSM258729 CEL  
 100-3T3-L1 GSM258610 CEL  
 99-3T3-L1 GSM258609 CEL  
 98-10T12 GSM258632 CEL  
 97-10T12 GSM258631 CEL  
 96-Osteoblast-d21 GSM258740 CEL  
 95-Osteoblast-d21 GSM258739 CEL  
 94-Osteoblast-d14 GSM258738 CEL  
 93-Osteoblast-d14 GSM258737 CEL  
 92-Osteoblast-d5 GSM258742 CEL  
 91-Osteoblast-d5 GSM258741 CEL  
 90-Chondrocytes GSM266741 CEL  
 89-Chondrocytes GSM266740 CEL  
 88-Nat Helper cell GSM465594 CEL  
 87-Nat Helper cell GSM465593 CEL  
 86-TT cell GSM465596 CEL  
 85-MS-1 GSM234692 CEL  
 84-Lymph-endo-cells GSM143704 CEL  
 83-PP-FDC GSM481977 CEL  
 82-PP-FDC GSM481978 CEL  
 81-PP-FDC GSM481976 CEL  
 80-D-F-L Y RMLNDCC003001 CEL  
 79-D-F-L Y RMLNDCC003001 CEL  
 78-Follicular-Bcells GSM258664 CEL  
 77-Follicular-Bcells GSM258663 CEL  
 76-MZ-Bcell GSM258622 CEL  
 75-MZ-Bcell GSM258621 CEL  
 74-BAF3 GSM258620 CEL  
 73-BAF3 GSM258619 CEL  
 72-Tregs GSM258778 CEL  
 71-Tregs GSM258777 CEL  
 70-T-cells-CD8+ GSM258776 CEL  
 69-T-cells-CD8+ GSM258774 CEL  
 68-T-cells-CD4+ GSM258773 CEL  
 67-T-cells-CD4+ GSM258773 CEL  
 66-Thymocyte-DN GSM465595 CEL  
 65-Osteoclasts GSM258743 CEL  
 64-Osteoclasts GSM258743 CEL  
 63-Microglia GSM258721 CEL  
 62-Microglia GSM258721 CEL  
 61-MM-LPS-7h GSM268706 CEL  
 60-MM-LPS-7h GSM268705 CEL  
 59-MM-LPS-6h GSM258702 CEL  
 58-MM-LPS-6h GSM258701 CEL  
 57-MM-LPS-6h GSM258699 CEL  
 56-MM-LPS-6h GSM258699 CEL  
 55-MM-LPS-6h GSM258694 CEL  
 54-MM-LPS-6h GSM258694 CEL  
 53-Plasmacytoid-DC GSM258650 CEL  
 52-Plasmacytoid-DC GSM258649 CEL  
 51-CD8a-DC GSM258647 CEL  
 50-CD8a-DC GSM258647 CEL  
 49-CD8a+DC GSM258646 CEL  
 48-CD8a+DC GSM258646 CEL  
 47-NK-cells GSM258732 CEL  
 46-NK-cells GSM258731 CEL  
 45-Mast-cells-IgE+Ad GSM258718 CEL  
 44-Mast-cells-IgE+Ad GSM258717 CEL  
 43-Mast-cells-IgE GSM258714 CEL  
 42-Mast-cells-IgE GSM258713 CEL  
 41-Mast-cells GSM258712 CEL  
 40-Granulocytes GSM258668 CEL  
 39-Granulocytes GSM258667 CEL  
 38-GMP GSM258666 CEL  
 37-GMP GSM258666 CEL  
 36-GMP GSM258666 CEL  
 35-GMP GSM258642 CEL  
 34-GMP GSM258642 CEL  
 33-MEP GSM258720 CEL  
 32-MEP GSM258719 CEL  
 31-HESC GSM258770 CEL  
 30-HESC GSM258769 CEL  
 29-Bone marrow GSM258628 CEL  
 28-Bone marrow GSM258627 CEL  
 27-paneth-cells-GE GSM116358 CEL  
 26-paneth-cells-GE GSM116357 CEL  
 25-paneth-cells GSM116350 CEL  
 24-paneth-cells GSM116359 CEL  
 23-paneth-cells GSM318589 CEL  
 22-paneth-cells GSM318590 CEL  
 21-Colon-Crypt GSM480375 cel  
 20-Colon-Crypt GSM480374 cel  
 19-Colon-Vill GSM480363 cel  
 18-Colon-Vill GSM480362 cel  
 17-Colon-IEC-GE GSM349880 CEL  
 16-Colon-IEC-GE GSM350375 CEL  
 15-Ileum-IEC-GE GSM350376 CEL  
 14-Ileum-IEC GSM350371 CEL  
 13-Small-intestine-epithelium RMINEP002001 CEL  
 12-Small-intestine-epithelium RMINEP001001 CEL  
 11-FAE-RMPYEP002001 CEL  
 10-FAE-RMPYEP001001 CEL  
 09-Ileum-IEC GSM190797 CEL  
 08-Ileum-IEC GSM190796 CEL  
 07-Ileum-IEC GSM190795 CEL  
 06-CT-v-M-cells GSM190794 CEL  
 05-CT-v-M-cells GSM190793 CEL  
 04-PP-M-cells GSM190792 CEL  
 03-PP-M-cells GSM190791 CEL  
 02-PP-M-cells GSM190790 CEL  
 01-PP-M-cells GSM190789 CEL



Cluster0057\_High in colonic villi (35 nodes)

1,672.5  
1,584.4  
1,496.4  
1,408.4  
1,320.4  
1,232.3  
1,144.3  
1,056.3  
968.3  
880.2  
792.2  
704.2  
616.2  
528.1  
440.1  
352.1  
264.1  
176  
88  
0

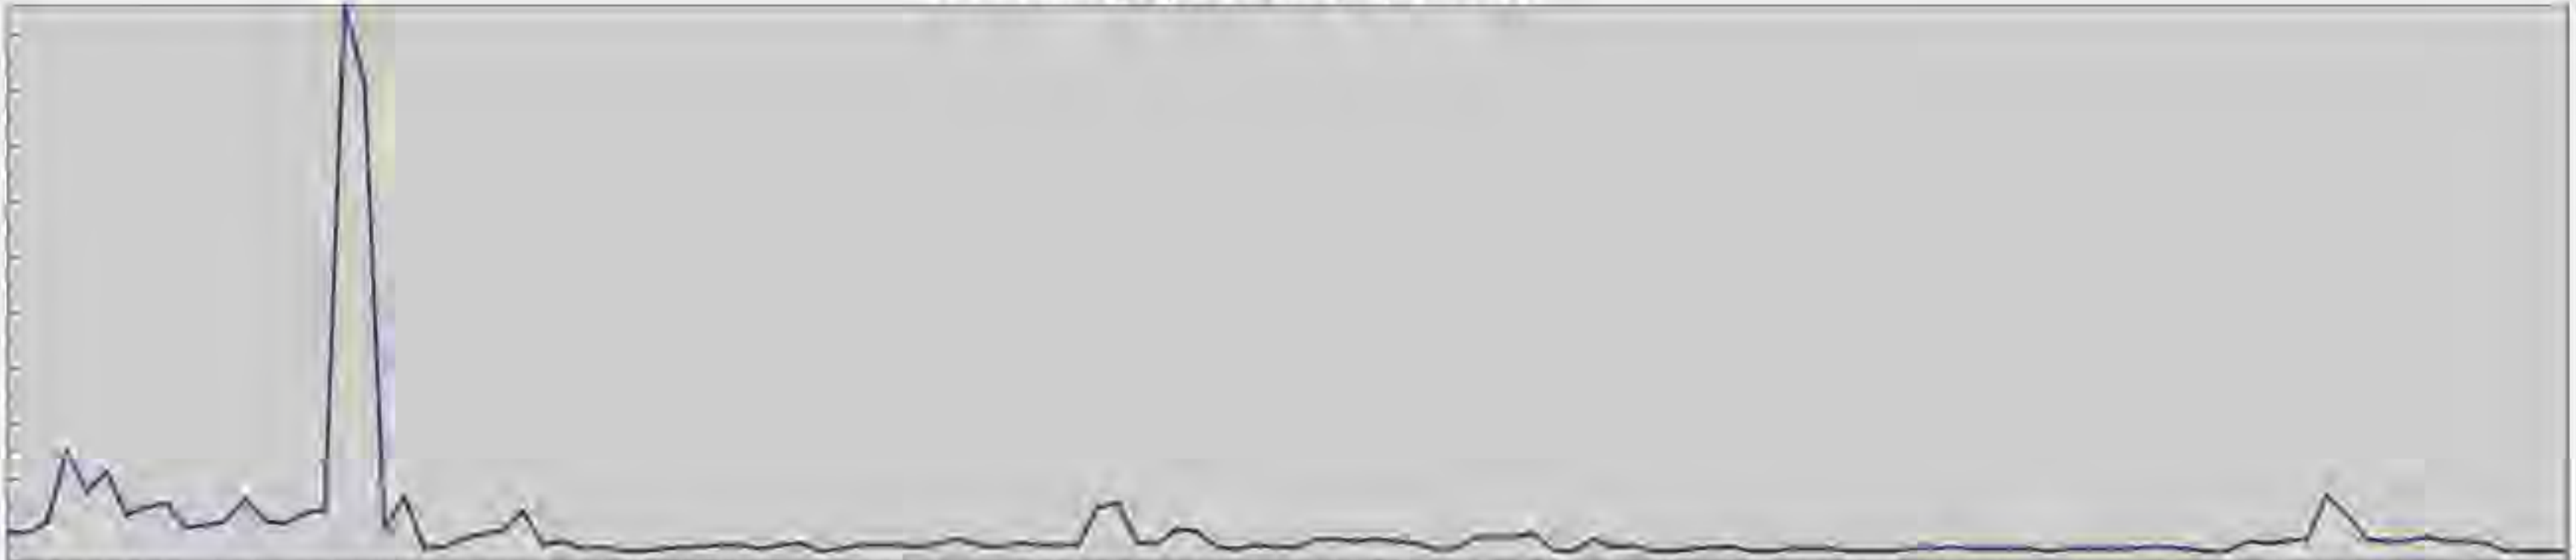

01-PP-M-cells\_GSM190789.CEL  
 02-PP-M-cells\_GSM190790.CEL  
 03-PP-M-cells\_GSM190791.CEL  
 04-CT-Y-M-cells\_GSM190792.CEL  
 05-CT-Y-M-cells\_GSM190793.CEL  
 06-CT-W-M-cells\_GSM190794.CEL  
 07-Ileum-IEC\_GSM190795.CEL  
 08-Ileum-IEC\_GSM190796.CEL  
 09-Ileum-IEC\_GSM190797.CEL  
 10-FAE-RMPYEP001001.CEL  
 11-FAE-RMPYEP002001.CEL  
 12-Small-intestine-epithelium\_RMINEP001001.CEL  
 13-Small-intestine-epithelium\_RMINEP002001.CEL  
 14-Ileum-IEC\_GSM350371.CEL  
 15-Ileum-IEC\_GSM350375.CEL  
 16-Color-Villi\_GSM480362.CEL  
 17-Color-Villi\_GSM480363.CEL  
 18-Color-Villi\_GSM480364.CEL  
 19-Color-Villi\_GSM480365.CEL  
 20-Color-Crypt\_GSM480374.CEL  
 21-Color-Crypt\_GSM480375.CEL  
 22-Paneth-cells\_GSM318589.CEL  
 23-Paneth-cells\_GSM318590.CEL  
 24-Paneth-cells\_GSM116359.CEL  
 25-Paneth-cells\_GSM116359.CEL  
 26-Paneth-cells\_GSM116359.CEL  
 27-Paneth-cells\_GSM116357.CEL  
 28-Paneth-cells\_GSM116357.CEL  
 29-Bone marrow\_GSM258627.CEL  
 30-HSC\_GSM258770.CEL  
 31-HSC\_GSM258770.CEL  
 32-MEP\_GSM258770.CEL  
 33-MEP\_GSM258770.CEL  
 34-MEP\_GSM258770.CEL  
 35-CMP\_GSM258642.CEL  
 36-CMP\_GSM258642.CEL  
 37-GMP\_GSM258665.CEL  
 38-GMP\_GSM258665.CEL  
 39-Granulocytes\_GSM258667.CEL  
 40-Granulocytes\_GSM258667.CEL  
 41-Mast-cells\_GSM258712.CEL  
 42-Mast-cells\_GSM258712.CEL  
 43-Mast-cells-IdU+Ad\_GSM258714.CEL  
 44-Mast-cells-IdU+Ad\_GSM258714.CEL  
 45-Mast-cells-IdU+Ad\_GSM258719.CEL  
 46-NK-cells\_GSM258732.CEL  
 47-NK-cells\_GSM258732.CEL  
 48-CD8a+DC\_GSM258646.CEL  
 49-CD8a+DC\_GSM258646.CEL  
 50-CD8a-DC\_GSM258647.CEL  
 51-CD8a-DC\_GSM258647.CEL  
 52-CD8a-DC\_GSM258647.CEL  
 53-Plasmacytoid-DC\_GSM258650.CEL  
 54-BM-M-PS-6h\_GSM258694.CEL  
 55-BM-M-PS-6h\_GSM258694.CEL  
 56-BM-M-PS-6h\_GSM258699.CEL  
 57-BM-M-PS-6h\_GSM258699.CEL  
 58-BM-M-PS-7h\_GSM258702.CEL  
 59-BM-M-PS-7h\_GSM258702.CEL  
 60-BM-M-PS-7h\_GSM258705.CEL  
 61-BM-M-PS-7h\_GSM258705.CEL  
 62-Microglia\_GSM258721.CEL  
 63-Microglia\_GSM258721.CEL  
 64-Osteoclasts\_GSM258743.CEL  
 65-Osteoclasts\_GSM258743.CEL  
 66-Thymocyte-DN\_GSM465595.CEL  
 67-T-cells-CD4+GSM258773.CEL  
 68-T-cells-CD4+GSM258773.CEL  
 69-T-cells-CD8+GSM258776.CEL  
 70-T-cells-CD8+GSM258776.CEL  
 71-Tregs\_GSM258778.CEL  
 72-Tregs\_GSM258778.CEL  
 73-BAF3\_GSM258620.CEL  
 74-BAF3\_GSM258620.CEL  
 75-MZ-Bcell\_GSM258622.CEL  
 76-MZ-Bcell\_GSM258622.CEL  
 77-Follicular-Bcells\_GSM258664.CEL  
 78-Follicular-Bcells\_GSM258664.CEL  
 79-E-L-Y-RMLNDC002001.CEL  
 80-E-L-Y-RMLNDC003001.CEL  
 81-PP-FDC\_GSM481976.CEL  
 82-PP-FDC\_GSM481976.CEL  
 83-PP-FDC\_GSM481978.CEL  
 84-Lymph-endo-cells\_GSM143704.CEL  
 85-MS-1\_GSM234692.CEL  
 86-Nat Helper cell\_GSM465593.CEL  
 87-Nat Helper cell\_GSM465593.CEL  
 88-Nat Helper cell\_GSM465594.CEL  
 89-Chondrocytes\_GSM266741.CEL  
 90-Chondrocytes\_GSM266741.CEL  
 91-Osteoblast-d5\_GSM258741.CEL  
 92-Osteoblast-d5\_GSM258741.CEL  
 93-Osteoblast-d14\_GSM258737.CEL  
 94-Osteoblast-d14\_GSM258737.CEL  
 95-Osteoblast-d21\_GSM258738.CEL  
 96-Osteoblast-d21\_GSM258738.CEL  
 97-10T12\_GSM258632.CEL  
 98-10T12\_GSM258632.CEL  
 99-3T3-L1\_GSM258610.CEL  
 100-3T3-L1\_GSM258610.CEL  
 101-NH3T3\_GSM258739.CEL  
 102-NH3T3\_GSM258739.CEL  
 103-C2C12\_GSM258629.CEL  
 104-C2C12\_GSM258629.CEL  
 105-Bruce4\_GSM258690.CEL  
 106-Bruce4\_GSM258690.CEL  
 107-MIMCD3\_GSM258723.CEL  
 108-MIMCD3\_GSM258723.CEL  
 109-mim6\_GSM258725.CEL  
 110-mim6\_GSM258725.CEL  
 111-Astrocytes\_GSM241898.CEL  
 112-Astrocytes\_GSM241898.CEL  
 113-Spleen\_GSM258767.CEL  
 114-Spleen\_GSM258767.CEL  
 115-Lymph-nodes\_GSM258691.CEL  
 116-Lymph-nodes\_GSM258691.CEL  
 117-Lymph-nodes\_GSM258691.CEL  
 118-Intestine-small\_GSM258677.CEL  
 119-Intestine-small\_GSM258677.CEL  
 120-Intestine-large\_GSM258675.CEL  
 121-Intestine-large\_GSM258675.CEL  
 122-Intestine-large\_GSM258675.CEL  
 123-Intestine-large\_GSM258675.CEL  
 124-Intestine-large\_GSM258675.CEL  
 125-Intestine-large\_GSM258675.CEL  
 126-Intestine-large\_GSM258675.CEL  
 127-NALT\_GSM289408.CEL  
 128-NALT\_GSM289408.CEL  
 129-NALT\_GSM289410.CEL  
 130-NALT\_GSM289411.CEL  
 131-Intestine-large\_GSM258675.CEL  
 132-Intestine-large\_GSM258675.CEL  
 133-Intestine-large\_GSM258675.CEL  
 134-Intestine-large\_GSM258675.CEL  
 135-Intestine-large\_GSM258675.CEL







Cluster0059\_Large intestine-related (34 nodes)

1,929.9  
1,828.3  
1,726.7  
1,625.1  
1,523.6  
1,422  
1,320.4  
1,218.9  
1,117.3  
1,015.7  
914.1  
812.6  
711  
609.4  
507.9  
406.3  
304.7  
203.1  
101.6  
0

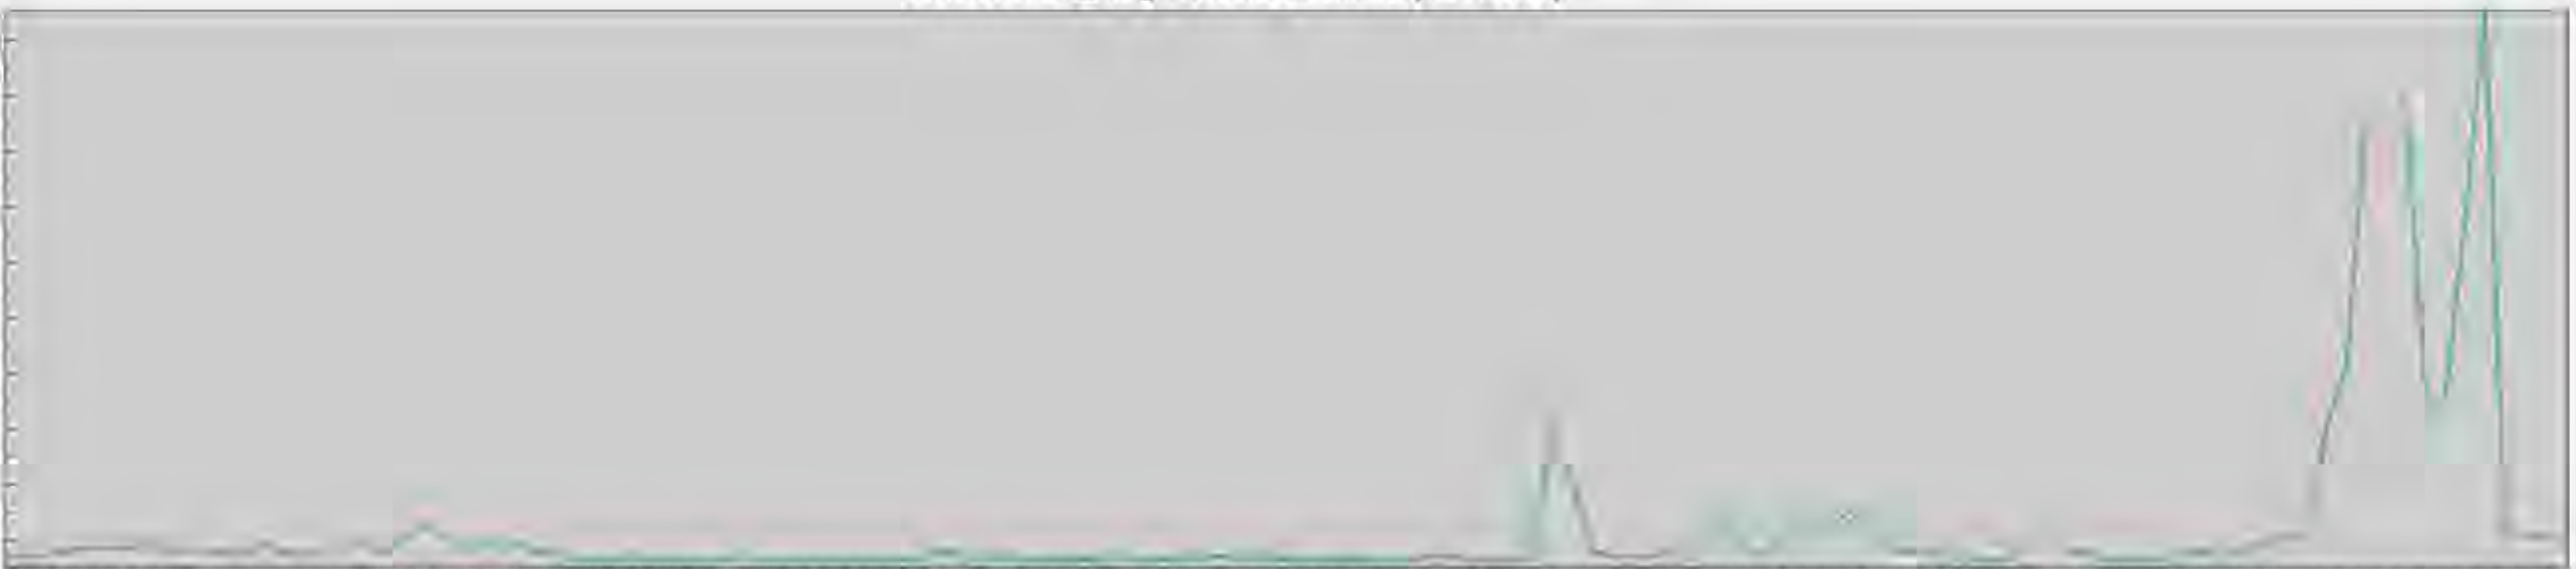

130-NALT GSM289411 CELL  
 129-NALT GSM289410 CELL  
 128-NALT GSM289409 CELL  
 127-NALT GSM289408 CELL  
 126-Color-d9 GSM1988105 CELL  
 125-Color-d9 GSM1988104 CELL  
 124-Color-d9 GSM1988103 CELL  
 123-Color-d4 GSM1988102 CELL  
 122-Color-d4 GSM1988101 CELL  
 121-Intestine-large GSM258676 CELL  
 120-Intestine-large GSM258675 CELL  
 119-Intestine-small GSM258677 CELL  
 118-Intestine-small GSM258692 CELL  
 117-Lymph-nodes GSM258691 CELL  
 116-Lymph-nodes GSM258726 CELL  
 115-Spleen GSM258766 CELL  
 114-Spleen GSM258767 CELL  
 113-Neuro2a GSM258728 CELL  
 112-Neuro2a GSM258727 CELL  
 111-Astrocytes GSM241898 CELL  
 110-mimb GSM258725 CELL  
 109-mimb GSM258724 CELL  
 108-MIMCD3 GSM258723 CELL  
 107-MIMCD3 GSM258722 CELL  
 106-Bruce4 GSM258656 CELL  
 105-Bruce4 GSM258655 CELL  
 104-C2C12 GSM258690 CELL  
 103-C2C12 GSM258689 CELL  
 102-NH3T3 GSM258730 CELL  
 101-NH3T3 GSM258729 CELL  
 100-3T3-L1 GSM258610 CELL  
 99-3T3-L1 GSM258609 CELL  
 98-10T12 GSM258632 CELL  
 97-10T12 GSM258631 CELL  
 96-Osteoblast-d21 GSM258740 CELL  
 95-Osteoblast-d21 GSM258739 CELL  
 94-Osteoblast-d14 GSM258738 CELL  
 93-Osteoblast-d14 GSM258737 CELL  
 92-Osteoblast-d5 GSM258742 CELL  
 91-Osteoblast-d5 GSM258741 CELL  
 90-Chondrocytes GSM266741 CELL  
 89-Chondrocytes GSM266740 CELL  
 88-Nat Helper cell GSM465594 CELL  
 87-Nat Helper cell GSM465593 CELL  
 86-TT cell GSM465596 CELL  
 85-MS-1 GSM234692 CELL  
 84-Lymph-endo-cells GSM143704 CELL  
 83-PP-FDC GSM481977 CELL  
 82-PP-FDC GSM481978 CELL  
 81-PP-FDC GSM481976 CELL  
 80-D-LY RMLNDCC003001 CELL  
 79-E-LY RMLNDCC003001 CELL  
 78-Follicular-Bcells GSM258664 CELL  
 77-Follicular-Bcells GSM258663 CELL  
 76-MZ-Bcell GSM258622 CELL  
 75-MZ-Bcell GSM258621 CELL  
 74-BAF3 GSM258620 CELL  
 73-BAF3 GSM258619 CELL  
 72-Tregs GSM258778 CELL  
 71-Tregs GSM258777 CELL  
 70-T-cells-CD8+ GSM258776 CELL  
 69-T-cells-CD8+ GSM258774 CELL  
 68-T-cells-CD4+ GSM258773 CELL  
 67-T-cells-CD4+ GSM258744 CELL  
 66-Thymocyte-DN GSM465595 CELL  
 65-Osteoclasts GSM258743 CELL  
 64-Microglia GSM258721 CELL  
 63-Microglia GSM258721 CELL  
 62-MM-LPS-7h GSM268706 CELL  
 61-MM-LPS-7h GSM268705 CELL  
 60-MM-LPS-6h GSM258702 CELL  
 59-MM-LPS-6h GSM258701 CELL  
 58-MM-LPS-6h GSM258699 CELL  
 57-MM-LPS-6h GSM258699 CELL  
 56-MM-LPS-6h GSM258694 CELL  
 55-MM-LPS-6h GSM258694 CELL  
 54-MM-LPS-6h GSM258694 CELL  
 53-Plasmacytoid-DC GSM258650 CELL  
 52-Plasmacytoid-DC GSM258649 CELL  
 51-CD8a-DC GSM258648 CELL  
 50-CD8a-DC GSM258647 CELL  
 49-CD8a+DC GSM258646 CELL  
 48-CD8a+DC GSM258645 CELL  
 47-NK-cells GSM258732 CELL  
 46-NK-cells GSM258731 CELL  
 45-Mast-cells-IgE+Ad GSM258718 CELL  
 44-Mast-cells-IgE+Ad GSM258717 CELL  
 43-Mast-cells-IgE GSM258714 CELL  
 42-Mast-cells-IgE GSM258713 CELL  
 41-Mast-cells GSM258712 CELL  
 40-Granulocytes GSM258668 CELL  
 39-Granulocytes GSM258667 CELL  
 38-GMP GSM258666 CELL  
 37-GMP GSM258665 CELL  
 36-GMP GSM258664 CELL  
 35-GMP GSM258642 CELL  
 34-MIEP GSM258641 CELL  
 33-MIEP GSM258641 CELL  
 32-MIEP GSM258720 CELL  
 31-HESC GSM258770 CELL  
 30-HESC GSM258769 CELL  
 29-Bone marrow GSM258628 CELL  
 28-Bone marrow GSM258627 CELL  
 27-paneth-cells-GE GSM116358 CELL  
 26-paneth-cells-GE GSM116357 CELL  
 25-paneth-cells GSM116350 CELL  
 24-paneth-cells GSM116359 CELL  
 23-paneth-cells GSM318589 CELL  
 22-paneth-cells GSM318590 CELL  
 21-paneth-cells GSM480375 CELL  
 20-Colon-Crypt GSM480374 CELL  
 19-Colon-Vill GSM480363 CELL  
 18-Colon-Vill GSM480362 CELL  
 17-Colon-IEC-Gf GSM349880 CELL  
 16-Colon-IEC-Gf GSM350375 CELL  
 15-Ileum-IEC-Gf GSM350376 CELL  
 14-Ileum-IEC GSM350371 CELL  
 13-Small-intestine-epithelium RMINEP002001 CELL  
 12-Small-intestine-epithelium RMINEP001001 CELL  
 11-FAE-RMPYEP002001 CELL  
 10-FAE-RMPYEP001001 CELL  
 9-Ileum-IEC GSM190797 CELL  
 8-Ileum-IEC GSM190796 CELL  
 7-Ileum-IEC GSM190795 CELL  
 6-CT-v-M-cells GSM190794 CELL  
 5-CT-v-M-cells GSM190793 CELL  
 4-CT-v-M-cells GSM190792 CELL  
 03-PP-M-cells GSM190791 CELL  
 02-PP-M-cells GSM190790 CELL  
 01-PP-M-cells GSM190789 CELL



Cluster0060\_High in NIH3T3 embronic fibroblasts & C2C12 myoblasts (34 nodes)

1,816.6  
1,721  
1,625.4  
1,529.8  
1,434.1  
1,338.5  
1,242.9  
1,147.3  
1,051.7  
956.1  
860.5  
764.9  
669.3  
573.7  
478  
382.4  
286.8  
191.2  
95.6  
0

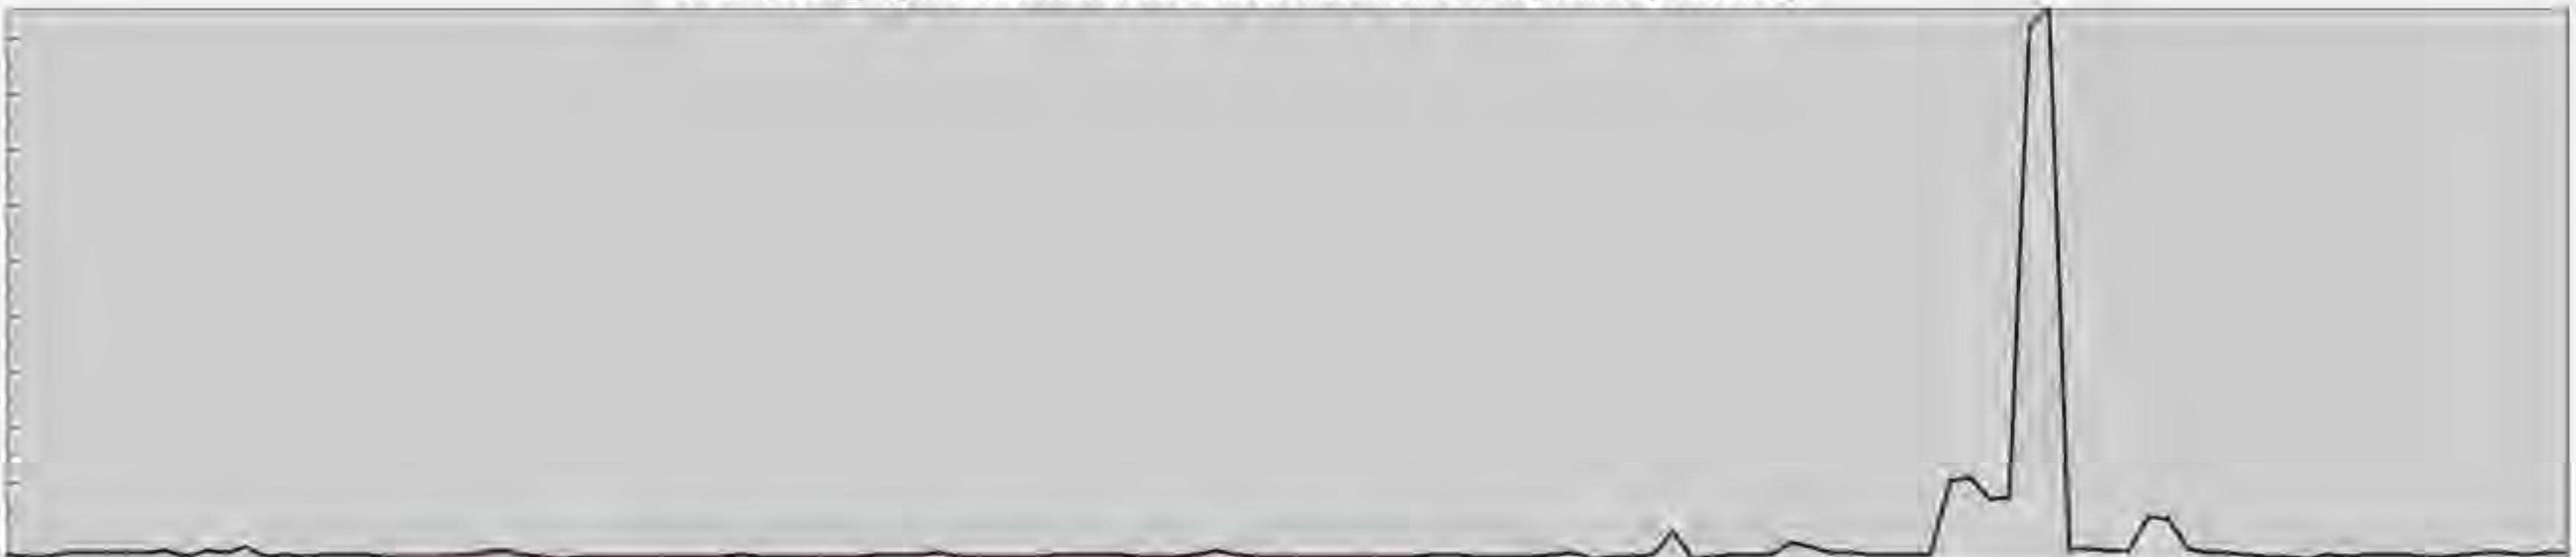

|     |                            |              |      |
|-----|----------------------------|--------------|------|
| 01  | PP-M-cells                 | GSM190789    | CEL  |
| 02  | PP-M-cells                 | GSM190790    | CEL  |
| 03  | PP-M-cells                 | GSM190791    | CEL  |
| 04  | CT-Y-M-cells               | GSM190792    | CEL  |
| 05  | CT-Y-M-cells               | GSM190793    | CEL  |
| 06  | CT-W-M-cells               | GSM190794    | CEL  |
| 07  | Ileum-IEC                  | GSM190795    | CEL  |
| 08  | Ileum-IEC                  | GSM190796    | CEL  |
| 09  | Ileum-IEC                  | GSM190797    | CEL  |
| 10  | FAE-RMP                    | GSM190798    | CEL  |
| 11  | FAE-RMP                    | GSM190799    | CEL  |
| 12  | Small intestine-epithelium | RMINEP001001 | CEL  |
| 13  | Small intestine-epithelium | RMINEP002001 | CEL  |
| 14  | Ileum-IEC                  | GSM350371    | CEL  |
| 15  | Ileum-IEC                  | GSM350375    | CEL  |
| 16  | Colon-VIII                 | GSM480362    | cel  |
| 17  | Colon-VIII                 | GSM480363    | cel  |
| 18  | Colon-VIII                 | GSM480364    | cel  |
| 19  | Colon-VIII                 | GSM480374    | cel  |
| 20  | Colon-Crypt                | GSM480375    | cel  |
| 21  | Colon-Crypt                | GSM480376    | cel  |
| 22  | Paneth-cells               | GSM318589    | CEL  |
| 23  | Paneth-cells               | GSM318590    | CEL  |
| 24  | Paneth-cells               | GSM116359    | CEL  |
| 25  | Paneth-cells               | GSM116360    | CEL  |
| 26  | Paneth-cells               | GSM116357    | CEL  |
| 27  | Paneth-cells               | GSM116358    | CEL  |
| 28  | Paneth-cells               | GSM116359    | CEL  |
| 29  | Bone marrow                | GSM258627    | CEL  |
| 30  | NALT                       | GSM289411    | CELL |
| 31  | NALT                       | GSM289410    | CELL |
| 32  | NALT                       | GSM289409    | CELL |
| 33  | NALT                       | GSM289408    | CELL |
| 34  | Colon-d9                   | GSM198810    | CELL |
| 35  | Colon-d9                   | GSM198811    | CELL |
| 36  | Colon-d9                   | GSM198812    | CELL |
| 37  | Colon-d4                   | GSM198813    | CELL |
| 38  | Colon-d4                   | GSM198814    | CELL |
| 39  | Colon-d4                   | GSM198815    | CELL |
| 40  | Intestine-large            | GSM258675    | CEL  |
| 41  | Intestine-large            | GSM258676    | CEL  |
| 42  | Intestine-small            | GSM258677    | CEL  |
| 43  | Intestine-small            | GSM258678    | CEL  |
| 44  | Spleen                     | GSM258679    | CEL  |
| 45  | Spleen                     | GSM258680    | CEL  |
| 46  | Spleen                     | GSM258681    | CEL  |
| 47  | Lymph-nodes                | GSM258682    | CEL  |
| 48  | Lymph-nodes                | GSM258683    | CEL  |
| 49  | Lymph-nodes                | GSM258684    | CEL  |
| 50  | min6                       | GSM258685    | CEL  |
| 51  | min6                       | GSM258686    | CEL  |
| 52  | min6                       | GSM258687    | CEL  |
| 53  | MIMCD3                     | GSM258688    | CEL  |
| 54  | MIMCD3                     | GSM258689    | CEL  |
| 55  | MIMCD3                     | GSM258690    | CEL  |
| 56  | Bruce4                     | GSM258691    | CEL  |
| 57  | Bruce4                     | GSM258692    | CEL  |
| 58  | Bruce4                     | GSM258693    | CEL  |
| 59  | Bruce4                     | GSM258694    | CEL  |
| 60  | C2C12                      | GSM258695    | CEL  |
| 61  | C2C12                      | GSM258696    | CEL  |
| 62  | C2C12                      | GSM258697    | CEL  |
| 63  | C2C12                      | GSM258698    | CEL  |
| 64  | C2C12                      | GSM258699    | CEL  |
| 65  | C2C12                      | GSM258700    | CEL  |
| 66  | C2C12                      | GSM258701    | CEL  |
| 67  | C2C12                      | GSM258702    | CEL  |
| 68  | C2C12                      | GSM258703    | CEL  |
| 69  | C2C12                      | GSM258704    | CEL  |
| 70  | C2C12                      | GSM258705    | CEL  |
| 71  | C2C12                      | GSM258706    | CEL  |
| 72  | C2C12                      | GSM258707    | CEL  |
| 73  | C2C12                      | GSM258708    | CEL  |
| 74  | C2C12                      | GSM258709    | CEL  |
| 75  | C2C12                      | GSM258710    | CEL  |
| 76  | C2C12                      | GSM258711    | CEL  |
| 77  | C2C12                      | GSM258712    | CEL  |
| 78  | C2C12                      | GSM258713    | CEL  |
| 79  | C2C12                      | GSM258714    | CEL  |
| 80  | C2C12                      | GSM258715    | CEL  |
| 81  | C2C12                      | GSM258716    | CEL  |
| 82  | C2C12                      | GSM258717    | CEL  |
| 83  | C2C12                      | GSM258718    | CEL  |
| 84  | C2C12                      | GSM258719    | CEL  |
| 85  | C2C12                      | GSM258720    | CEL  |
| 86  | C2C12                      | GSM258721    | CEL  |
| 87  | C2C12                      | GSM258722    | CEL  |
| 88  | C2C12                      | GSM258723    | CEL  |
| 89  | C2C12                      | GSM258724    | CEL  |
| 90  | C2C12                      | GSM258725    | CEL  |
| 91  | C2C12                      | GSM258726    | CEL  |
| 92  | C2C12                      | GSM258727    | CEL  |
| 93  | C2C12                      | GSM258728    | CEL  |
| 94  | C2C12                      | GSM258729    | CEL  |
| 95  | C2C12                      | GSM258730    | CEL  |
| 96  | C2C12                      | GSM258731    | CEL  |
| 97  | C2C12                      | GSM258732    | CEL  |
| 98  | C2C12                      | GSM258733    | CEL  |
| 99  | C2C12                      | GSM258734    | CEL  |
| 100 | C2C12                      | GSM258735    | CEL  |
| 101 | C2C12                      | GSM258736    | CEL  |
| 102 | C2C12                      | GSM258737    | CEL  |
| 103 | C2C12                      | GSM258738    | CEL  |
| 104 | C2C12                      | GSM258739    | CEL  |
| 105 | C2C12                      | GSM258740    | CEL  |
| 106 | C2C12                      | GSM258741    | CEL  |
| 107 | C2C12                      | GSM258742    | CEL  |
| 108 | C2C12                      | GSM258743    | CEL  |
| 109 | C2C12                      | GSM258744    | CEL  |
| 110 | C2C12                      | GSM258745    | CEL  |
| 111 | C2C12                      | GSM258746    | CEL  |
| 112 | C2C12                      | GSM258747    | CEL  |
| 113 | C2C12                      | GSM258748    | CEL  |
| 114 | C2C12                      | GSM258749    | CEL  |
| 115 | C2C12                      | GSM258750    | CEL  |
| 116 | C2C12                      | GSM258751    | CEL  |
| 117 | C2C12                      | GSM258752    | CEL  |
| 118 | C2C12                      | GSM258753    | CEL  |
| 119 | C2C12                      | GSM258754    | CEL  |
| 120 | C2C12                      | GSM258755    | CEL  |
| 121 | C2C12                      | GSM258756    | CEL  |
| 122 | C2C12                      | GSM258757    | CEL  |
| 123 | C2C12                      | GSM258758    | CEL  |
| 124 | C2C12                      | GSM258759    | CEL  |
| 125 | C2C12                      | GSM258760    | CEL  |
| 126 | C2C12                      | GSM258761    | CEL  |
| 127 | C2C12                      | GSM258762    | CEL  |
| 128 | C2C12                      | GSM258763    | CEL  |
| 129 | C2C12                      | GSM258764    | CEL  |
| 130 | C2C12                      | GSM258765    | CEL  |



Cluster0061\_High in CD8+ DC (31 nodes)

547.9  
519.1  
490.3  
461.4  
432.6  
403.7  
374.9  
346.1  
317.2  
288.4  
259.6  
230.7  
201.9  
173  
144.2  
115.4  
86.5  
57.7  
28.8  
0

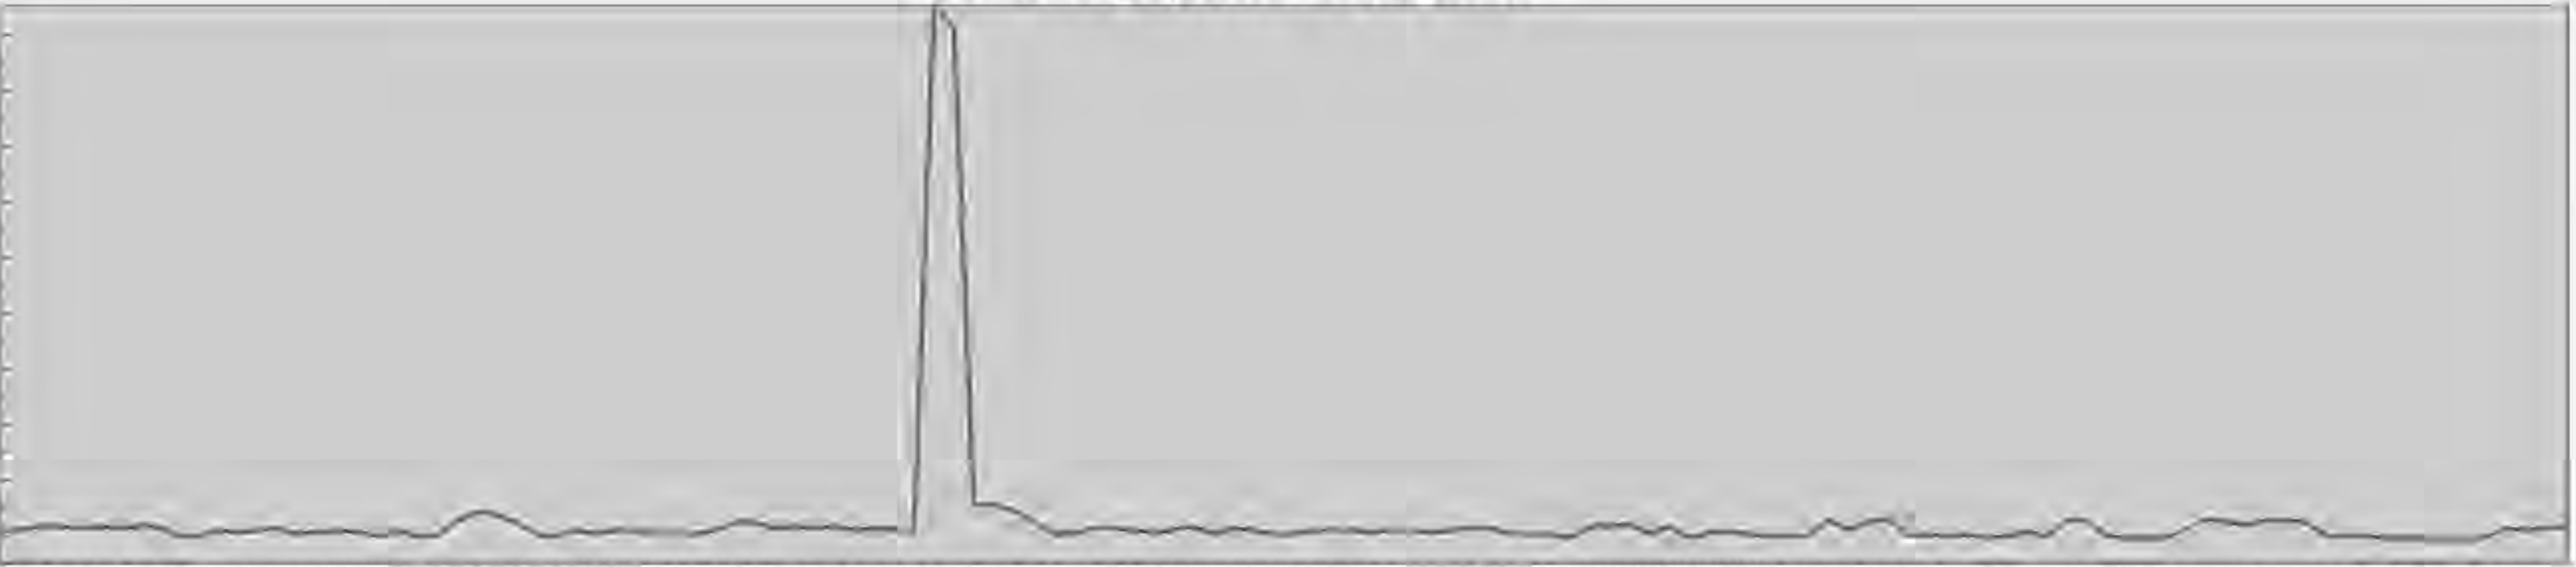

|     |                            |              |     |
|-----|----------------------------|--------------|-----|
| 30  | NALT                       | GSM289411    | CEL |
| 29  | NALT                       | GSM289410    | CEL |
| 28  | NALT                       | GSM289409    | CEL |
| 27  | NALT                       | GSM289408    | CEL |
| 26  | Color-d9                   | GSM1988104   | CEL |
| 25  | Color-d9                   | GSM1988103   | CEL |
| 24  | Color-d9                   | GSM1988102   | CEL |
| 23  | Color-d4                   | GSM1988101   | CEL |
| 22  | Color-d4                   | GSM1988100   | CEL |
| 21  | Intestine-large            | GSM258676    | CEL |
| 20  | Intestine-large            | GSM258675    | CEL |
| 19  | Intestine-small            | GSM258678    | CEL |
| 18  | Intestine-small            | GSM258677    | CEL |
| 17  | Lymph-nodes                | GSM258691    | CEL |
| 16  | Spleen                     | GSM258679    | CEL |
| 15  | Spleen                     | GSM258678    | CEL |
| 14  | Neuro2a                    | GSM241898    | CEL |
| 13  | Neuro2a                    | GSM241897    | CEL |
| 12  | Astrocytes                 | GSM241898    | CEL |
| 11  | ming                       | GSM258726    | CEL |
| 10  | ming                       | GSM258725    | CEL |
| 09  | ming                       | GSM258724    | CEL |
| 08  | MIMCD3                     | GSM258723    | CEL |
| 07  | MIMCD3                     | GSM258722    | CEL |
| 06  | Bruce4                     | GSM258656    | CEL |
| 05  | Bruce4                     | GSM258655    | CEL |
| 04  | C2C12                      | GSM258690    | CEL |
| 03  | C2C12                      | GSM258689    | CEL |
| 02  | NH3T3                      | GSM258730    | CEL |
| 01  | NH3T3                      | GSM258729    | CEL |
| 100 | 3T3-L1                     | GSM258610    | CEL |
| 99  | 3T3-L1                     | GSM258609    | CEL |
| 98  | 10T12                      | GSM258632    | CEL |
| 97  | 10T12                      | GSM258631    | CEL |
| 96  | Osteoblast-d21             | GSM258740    | CEL |
| 95  | Osteoblast-d21             | GSM258739    | CEL |
| 94  | Osteoblast-d14             | GSM258738    | CEL |
| 93  | Osteoblast-d14             | GSM258737    | CEL |
| 92  | Osteoblast-d5              | GSM258742    | CEL |
| 91  | Osteoblast-d5              | GSM258741    | CEL |
| 90  | Chondrocytes               | GSM266741    | CEL |
| 89  | Chondrocytes               | GSM266740    | CEL |
| 88  | Nat Helper cell            | GSM465594    | CEL |
| 87  | Nat Helper cell            | GSM465593    | CEL |
| 86  | Tt cell                    | GSM465596    | CEL |
| 85  | MS-1                       | GSM234692    | CEL |
| 84  | Lymph-endo-cells           | GSM143704    | CEL |
| 83  | PP-FDC                     | GSM481977    | CEL |
| 82  | PP-FDC                     | GSM481978    | CEL |
| 81  | PP-FDC                     | GSM481976    | CEL |
| 80  | E-LY                       | RMLNDC003001 | CEL |
| 79  | E-LY                       | RMLNDC003001 | CEL |
| 78  | Follicular-Bcells          | GSM258654    | CEL |
| 77  | Follicular-Bcells          | GSM258653    | CEL |
| 76  | MZ-Bcell                   | GSM258622    | CEL |
| 75  | MZ-Bcell                   | GSM258621    | CEL |
| 74  | BAF3                       | GSM258620    | CEL |
| 73  | BAF3                       | GSM258619    | CEL |
| 72  | Tregs                      | GSM258778    | CEL |
| 71  | Tregs                      | GSM258777    | CEL |
| 70  | T-cells-CD8+               | GSM258776    | CEL |
| 69  | T-cells-CD8+               | GSM258775    | CEL |
| 68  | T-cells-CD4+               | GSM258774    | CEL |
| 67  | T-cells-CD4+               | GSM258773    | CEL |
| 66  | Thymocyte-DN               | GSM465595    | CEL |
| 65  | Osteoclasts                | GSM258744    | CEL |
| 64  | Osteoclasts                | GSM258743    | CEL |
| 63  | Microglia                  | GSM258721    | CEL |
| 62  | Microglia                  | GSM258721    | CEL |
| 61  | MM-LPS-7h                  | GSM258706    | CEL |
| 60  | MM-LPS-7h                  | GSM258705    | CEL |
| 59  | MM-LPS-6h                  | GSM258702    | CEL |
| 58  | MM-LPS-6h                  | GSM258701    | CEL |
| 57  | MM-LPS-6h                  | GSM258700    | CEL |
| 56  | MM-LPS-6h                  | GSM258699    | CEL |
| 55  | MM-LPS-6h                  | GSM258694    | CEL |
| 54  | MM-LPS-6h                  | GSM258693    | CEL |
| 53  | Plasmacytoid-DC            | GSM258650    | CEL |
| 52  | CD8a-DC                    | GSM258649    | CEL |
| 51  | CD8a-DC                    | GSM258647    | CEL |
| 50  | CD8a+DC                    | GSM258646    | CEL |
| 49  | CD8a+DC                    | GSM258645    | CEL |
| 48  | NK-cells                   | GSM258732    | CEL |
| 47  | NK-cells                   | GSM258731    | CEL |
| 46  | Mast-cells-IgE+Ad          | GSM258718    | CEL |
| 45  | Mast-cells-IgE+Ad          | GSM258717    | CEL |
| 44  | Mast-cells-IgE             | GSM258714    | CEL |
| 43  | Mast-cells-IgE             | GSM258713    | CEL |
| 42  | Mast-cells                 | GSM258712    | CEL |
| 41  | Mast-cells                 | GSM258711    | CEL |
| 40  | Granulocytes               | GSM258668    | CEL |
| 39  | Granulocytes               | GSM258667    | CEL |
| 38  | GMP                        | GSM258666    | CEL |
| 37  | GMP                        | GSM258665    | CEL |
| 36  | GMP                        | GSM258664    | CEL |
| 35  | GMP                        | GSM258663    | CEL |
| 34  | GMP                        | GSM258662    | CEL |
| 33  | MIEP                       | GSM258672    | CEL |
| 32  | MIEP                       | GSM258671    | CEL |
| 31  | HESC                       | GSM258770    | CEL |
| 30  | HESC                       | GSM258769    | CEL |
| 29  | Bone marrow                | GSM258628    | CEL |
| 28  | Bone marrow                | GSM258627    | CEL |
| 27  | paneth-cells-GF            | GSM116358    | CEL |
| 26  | paneth-cells-GF            | GSM116357    | CEL |
| 25  | paneth-cells               | GSM116350    | CEL |
| 24  | paneth-cells               | GSM116349    | CEL |
| 23  | paneth-cells               | GSM318589    | CEL |
| 22  | paneth-cells               | GSM318590    | CEL |
| 21  | Colon-Crypt                | GSM480375    | CEL |
| 20  | Colon-Crypt                | GSM480374    | CEL |
| 19  | Colon-Vill                 | GSM480363    | CEL |
| 18  | Colon-Vill                 | GSM480362    | CEL |
| 17  | Colon-IEC-Gf               | GSM349880    | CEL |
| 16  | Colon-IEC-Gf               | GSM350375    | CEL |
| 15  | Ileum-IEC                  | GSM350376    | CEL |
| 14  | Ileum-IEC                  | GSM350371    | CEL |
| 13  | Small-intestine-epithelium | RMINEP002001 | CEL |
| 12  | Small-intestine-epithelium | RMINEP001001 | CEL |
| 11  | FAE                        | RMPYEP002001 | CEL |
| 10  | FAE                        | RMPYEP001001 | CEL |
| 09  | Ileum-IEC                  | GSM190797    | CEL |
| 08  | Ileum-IEC                  | GSM190796    | CEL |
| 07  | Ileum-IEC                  | GSM190795    | CEL |
| 06  | CT-w-M-cells               | GSM190794    | CEL |
| 05  | CT-w-M-cells               | GSM190793    | CEL |
| 04  | CT-y-M-cells               | GSM190792    | CEL |
| 03  | PP-M-cells                 | GSM190791    | CEL |
| 02  | PP-M-cells                 | GSM190790    | CEL |
| 01  | PP-M-cells                 | GSM190789    | CEL |



Cluster0062\_Low in some Paneth cells (31 nodes)

100.6  
95.3  
90  
84.7  
79.4  
74.1  
68.8  
63.5  
58.2  
52.9  
47.6  
42.3  
37.1  
31.8  
26.5  
21.2  
15.9  
10.6  
5.3  
0

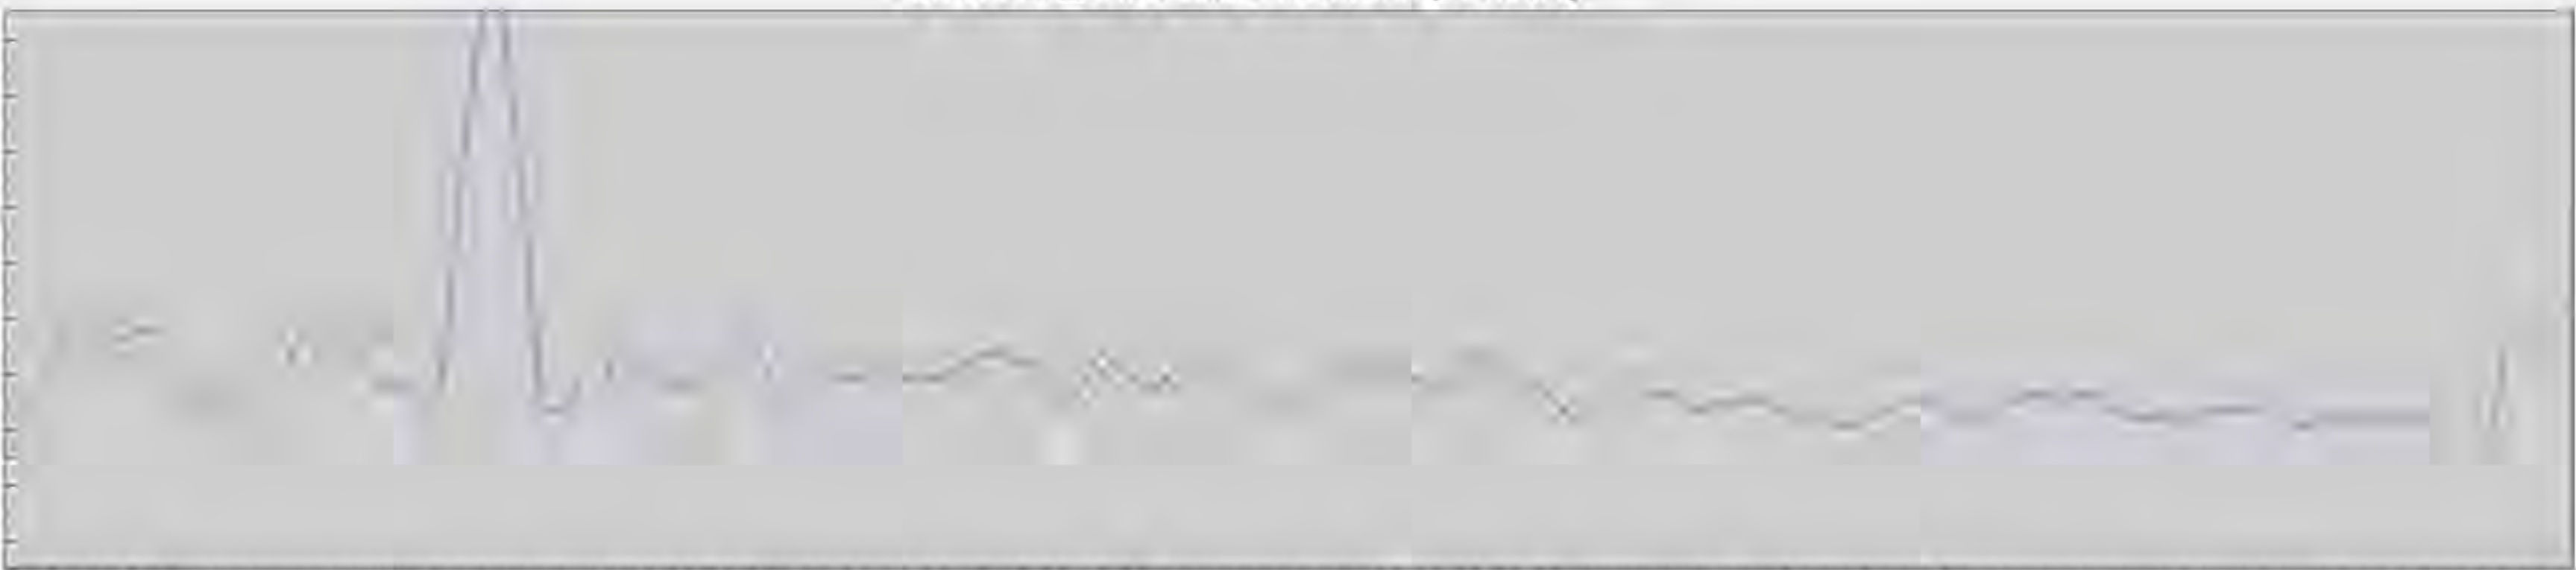

130-NALT GSM289411 CEL  
 129-NALT GSM289410 CEL  
 128-NALT GSM289409 CEL  
 127-NALT GSM289408 CEL  
 126-Column-d9 GSM1988105 CEL  
 125-Column-d9 GSM1988104 CEL  
 124-Column-d9 GSM1988103 CEL  
 123-Column-d4 GSM1988102 CEL  
 122-Column-d4 GSM1988101 CEL  
 121-Intestine-large GSM258676 CEL  
 120-Intestine-large GSM258675 CEL  
 119-Intestine-small GSM258678 CEL  
 118-Intestine-small GSM258677 CEL  
 117-Lymph-nodes GSM258691 CEL  
 116-Lymph-nodes GSM258690 CEL  
 115-Spleen GSM258728 CEL  
 114-Spleen GSM258727 CEL  
 113-Neuro2a GSM241898 CEL  
 112-Neuro2a GSM241897 CEL  
 111-Astrocytes GSM241898 CEL  
 110-mim6 GSM258726 CEL  
 109-mim6 GSM258725 CEL  
 108-MIMCD3 GSM258724 CEL  
 107-MIMCD3 GSM258723 CEL  
 106-Bruce4 GSM258656 CEL  
 105-Bruce4 GSM258655 CEL  
 104-C2C12 GSM258690 CEL  
 103-C2C12 GSM258689 CEL  
 102-NH3T3 GSM258730 CEL  
 101-NH3T3 GSM258729 CEL  
 100-3T3-L1 GSM258610 CEL  
 99-3T3-L1 GSM258609 CEL  
 98-10T12 GSM258632 CEL  
 97-10T12 GSM258631 CEL  
 96-Osteoblast-d21 GSM258740 CEL  
 95-Osteoblast-d21 GSM258739 CEL  
 94-Osteoblast-d14 GSM258738 CEL  
 93-Osteoblast-d14 GSM258737 CEL  
 92-Osteoblast-d5 GSM258742 CEL  
 91-Osteoblast-d5 GSM258741 CEL  
 90-Chondrocytes GSM266741 CEL  
 89-Chondrocytes GSM266740 CEL  
 88-Nat Helper cell GSM465594 CEL  
 87-Nat Helper cell GSM465593 CEL  
 86-TT cell GSM465596 CEL  
 85-MS-1 GSM234692 CEL  
 84-Lymph-endo-cells GSM143704 CEL  
 83-PP-FDC GSM481977 CEL  
 82-PP-FDC GSM481978 CEL  
 81-PP-FDC GSM481976 CEL  
 80-LY-RMLNDCC003001 CEL  
 79-LY-RMLNDCC003001 CEL  
 78-Follicular-Bcells GSM258664 CEL  
 77-Follicular-Bcells GSM258663 CEL  
 76-MZ-Bcell GSM258627 CEL  
 75-MZ-Bcell GSM258621 CEL  
 74-BAF3 GSM258620 CEL  
 73-BAF3 GSM258619 CEL  
 72-Tregs GSM258778 CEL  
 71-Tregs GSM258777 CEL  
 70-T-cells-CD8+ GSM258776 CEL  
 69-T-cells-CD8+ GSM258774 CEL  
 68-T-cells-CD4+ GSM258773 CEL  
 67-T-cells-CD4+ GSM258773 CEL  
 66-Thymocyte-DN GSM465595 CEL  
 65-Osteoclasts GSM258743 CEL  
 64-Microglia GSM258721 CEL  
 63-Microglia GSM258721 CEL  
 62-MM-LPS-7h GSM268706 CEL  
 61-MM-LPS-7h GSM268705 CEL  
 60-MM-LPS-6h GSM258702 CEL  
 59-MM-LPS-6h GSM258701 CEL  
 58-MM-LPS-6h GSM258699 CEL  
 57-MM-LPS-6h GSM258699 CEL  
 56-MM-LPS-6h GSM258694 CEL  
 55-Plasmacytoid-DC GSM258650 CEL  
 54-Plasmacytoid-DC GSM258649 CEL  
 53-CD8a-DC GSM258647 CEL  
 52-CD8a-DC GSM258647 CEL  
 51-CD8a-DC GSM258646 CEL  
 50-CD8a+DC GSM258646 CEL  
 49-CD8a+DC GSM258646 CEL  
 48-NK-cells GSM258732 CEL  
 47-NK-cells GSM258731 CEL  
 46-Mast-cells-IgE+Ad GSM258719 CEL  
 45-Mast-cells-IgE+Ad GSM258717 CEL  
 44-Mast-cells-IgE GSM258714 CEL  
 43-Mast-cells-IgE GSM258713 CEL  
 42-Mast-cells-IgE GSM258712 CEL  
 41-Mast-cells-IgE GSM258711 CEL  
 40-Granulocytes GSM258668 CEL  
 39-Granulocytes GSM258667 CEL  
 38-GMP GSM258666 CEL  
 37-GMP GSM258665 CEL  
 36-GMP GSM258664 CEL  
 35-GMP GSM258642 CEL  
 34-MEP GSM2588720 CEL  
 33-MEP GSM2588719 CEL  
 32-MEP GSM2588719 CEL  
 31-HESC GSM2588770 CEL  
 30-HESC GSM2588770 CEL  
 29-Bone marrow GSM258628 CEL  
 28-Bone marrow GSM258627 CEL  
 27-Paneth-cells-GF-1 GSM116357 CEL  
 26-Paneth-cells-GF-1 GSM116350 CEL  
 25-Paneth-cells-GF-1 GSM116350 CEL  
 24-Paneth-cells-GF-1 GSM116350 CEL  
 23-Paneth-cells-GF-1 GSM116350 CEL  
 22-Paneth-cells-GF-1 GSM116350 CEL  
 21-Column-Crypt GSM480375 cel  
 20-Column-Crypt GSM480374 cel  
 19-Column-Vill GSM480363 cel  
 18-Column-Vill GSM480362 cel  
 17-Column-IEC-GF GSM349880 CEL  
 16-Column-IEC-GF GSM350375 CEL  
 15-Column-IEC-GF GSM350375 CEL  
 14-Ileum-IEC GSM350371 CEL  
 13-Small-intestine-epithelium RMINEP002001 CEL  
 12-Small-intestine-epithelium RMINEP001001 CEL  
 11-FAE-RMPYEP002001 CEL  
 10-FAE-RMPYEP001001 CEL  
 09-Ileum-IEC GSM190797 CEL  
 08-Ileum-IEC GSM190796 CEL  
 07-Ileum-IEC GSM190795 CEL  
 06-CT-v-M-cells GSM190794 CEL  
 05-CT-v-M-cells GSM190793 CEL  
 04-CT-v-M-cells GSM190792 CEL  
 03-PP-M-cells GSM190791 CEL  
 02-PP-M-cells GSM190790 CEL  
 01-PP-M-cells GSM190789 CEL



Cluster0063\_Lymph node-related (30 nodes)

3,428.2  
3,247.8  
3,067.3  
2,886.9  
2,706.5  
2,526.1  
2,345.6  
2,165.2  
1,984.8  
1,804.3  
1,623.9  
1,443.5  
1,263  
1,082.6  
902.2  
721.7  
541.3  
360.9  
180.4  
0

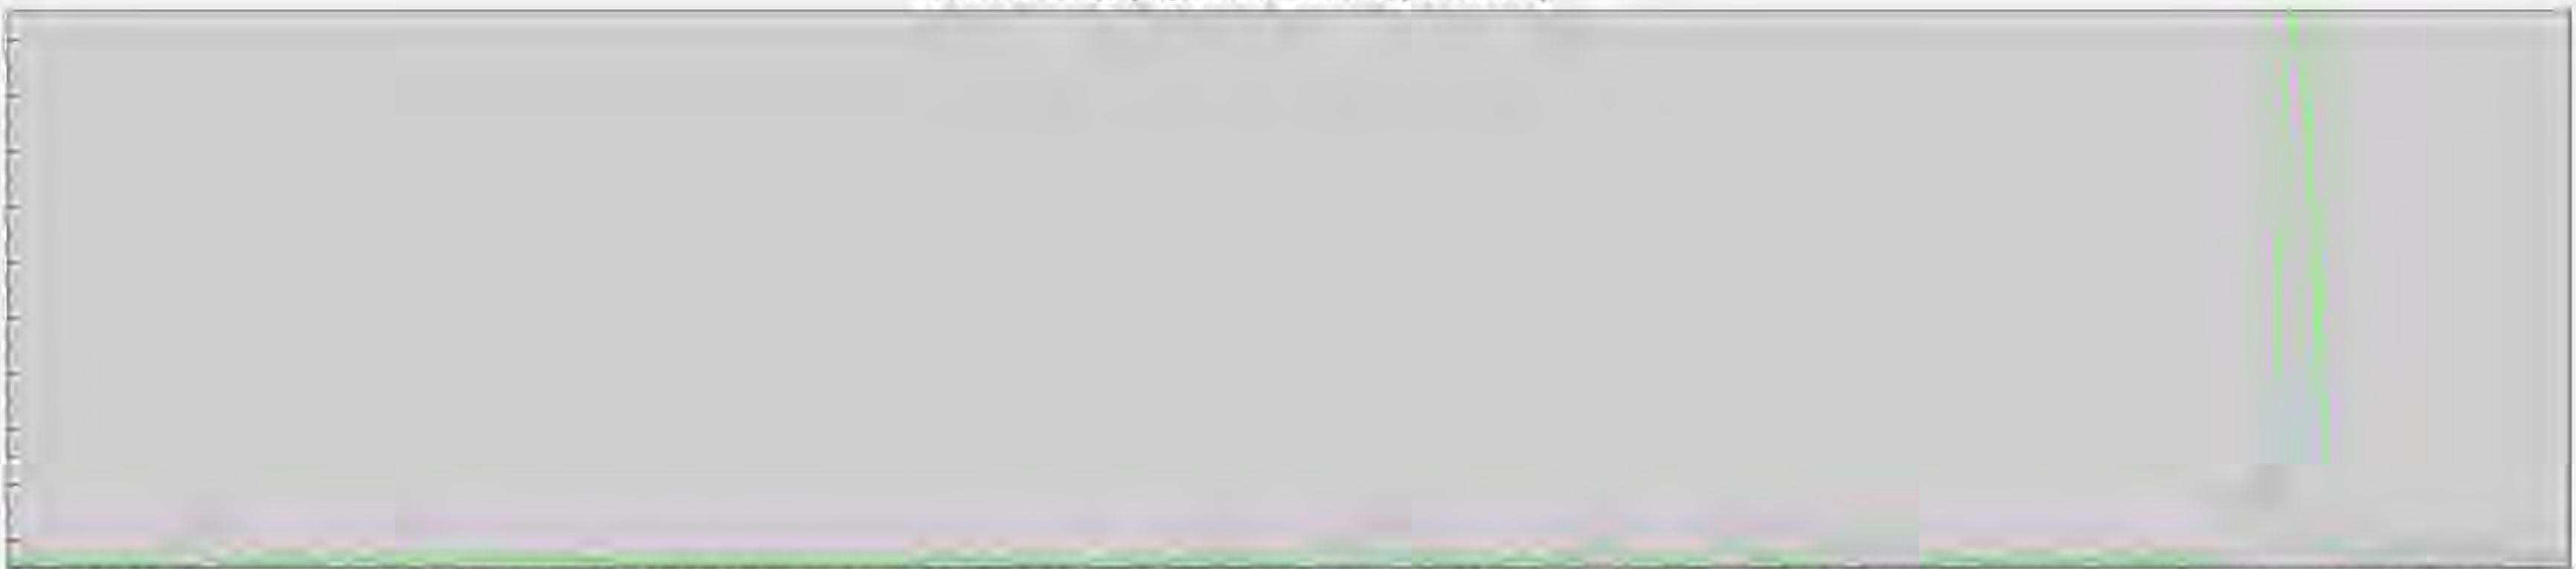

130-NALT GSM289411 CELL  
 129-NALT GSM289410 CELL  
 128-NALT GSM289409 CELL  
 127-NALT GSM289408 CELL  
 126-Color-d9 GSM1988105 CELL  
 125-Color-d9 GSM1988104 CELL  
 124-Color-d9 GSM1988103 CELL  
 123-Color-d4 GSM1988102 CELL  
 122-Color-d4 GSM1988101 CELL  
 121-Intestine-large GSM258676 CELL  
 120-Intestine-large GSM258675 CELL  
 119-Intestine-small GSM258674 CELL  
 118-Intestine-small GSM258673 CELL  
 117-Lymph-nodes GSM258672 CELL  
 116-Lymph-nodes GSM258671 CELL  
 115-Spleen GSM258767 CELL  
 114-Spleen GSM258766 CELL  
 113-Neuro2a GSM258727 CELL  
 112-Neuro2a GSM258726 CELL  
 111-Astrocytes GSM241898 CELL  
 110-mimb GSM258725 CELL  
 109-mimb GSM258724 CELL  
 108-MIMCD3 GSM258723 CELL  
 107-MIMCD3 GSM258722 CELL  
 106-Bruce4 GSM258656 CELL  
 105-Bruce4 GSM258655 CELL  
 104-C2C12 GSM258690 CELL  
 103-C2C12 GSM258689 CELL  
 102-NH3T3 GSM258739 CELL  
 101-NH3T3 GSM258738 CELL  
 100-3T3-L1 GSM258610 CELL  
 99-3T3-L1 GSM258609 CELL  
 98-10T12 GSM258632 CELL  
 97-10T12 GSM258631 CELL  
 96-Osteoblast-d21 GSM258740 CELL  
 95-Osteoblast-d21 GSM258739 CELL  
 94-Osteoblast-d14 GSM258738 CELL  
 93-Osteoblast-d14 GSM258737 CELL  
 92-Osteoblast-d5 GSM258742 CELL  
 91-Osteoblast-d5 GSM258741 CELL  
 90-Chondrocytes GSM266741 CELL  
 89-Chondrocytes GSM266740 CELL  
 88-Nat Helper cell GSM465594 CELL  
 87-Nat Helper cell GSM465593 CELL  
 86-TT cell GSM465596 CELL  
 85-MS-1 GSM234692 CELL  
 84-Lymph-endo-cells GSM143704 CELL  
 83-P-FDC GSM481977 CELL  
 82-P-FDC GSM481978 CELL  
 81-P-FDC GSM481976 CELL  
 80-D-LY RMLNDCC003001 CELL  
 79-E-LY RMLNDCC003001 CELL  
 78-Follicular-B-cells GSM258664 CELL  
 77-Follicular-B-cells GSM258663 CELL  
 76-MZ-Bcell GSM258627 CELL  
 75-MZ-Bcell GSM258627 CELL  
 74-BAF3 GSM258620 CELL  
 73-BAF3 GSM258619 CELL  
 72-Tregs GSM258778 CELL  
 71-Tregs GSM258777 CELL  
 70-T-cells-CD8+ GSM258776 CELL  
 69-T-cells-CD8+ GSM258774 CELL  
 68-T-cells-CD4+ GSM258773 CELL  
 67-T-cells-CD4+ GSM258744 CELL  
 66-Thymocyte-DN GSM465595 CELL  
 65-Osteoclasts GSM258743 CELL  
 64-Osteoclasts GSM258743 CELL  
 63-Microglia GSM258721 CELL  
 62-Microglia GSM258721 CELL  
 61-MM-LPS-7h GSM258706 CELL  
 60-MM-LPS-7h GSM258706 CELL  
 59-MM-LPS-6h GSM258702 CELL  
 58-MM-LPS-6h GSM258702 CELL  
 57-MM-LPS-6h GSM258699 CELL  
 56-MM-LPS-6h GSM258699 CELL  
 55-MM-LPS-6h GSM258694 CELL  
 54-MM-LPS-6h GSM258694 CELL  
 53-Plasmacytoid-DC GSM258650 CELL  
 52-Plasmacytoid-DC GSM258649 CELL  
 51-CD8a-DC GSM258647 CELL  
 50-CD8a-DC GSM258647 CELL  
 49-CD8a+DC GSM258646 CELL  
 48-CD8a+DC GSM258646 CELL  
 47-NK-cells GSM258732 CELL  
 46-NK-cells GSM258732 CELL  
 45-Mast-cells-IgE+Ad GSM258719 CELL  
 44-Mast-cells-IgE+Ad GSM258717 CELL  
 43-Mast-cells-IgE GSM258714 CELL  
 42-Mast-cells-IgE GSM258713 CELL  
 41-Mast-cells GSM258712 CELL  
 40-Granulocytes GSM258712 CELL  
 39-Granulocytes GSM258667 CELL  
 38-GMP GSM258666 CELL  
 37-GMP GSM258665 CELL  
 36-GMP GSM258665 CELL  
 35-CMP GSM258642 CELL  
 34-MEP GSM258642 CELL  
 33-MEP GSM258770 CELL  
 32-MEP GSM258770 CELL  
 31-HSC GSM258770 CELL  
 30-Bone marrow GSM258628 CELL  
 29-Bone marrow GSM258627 CELL  
 28-Paneth-cells-GE GSM116358 CELL  
 27-Paneth-cells-GE GSM116357 CELL  
 26-Paneth-cells GSM116350 CELL  
 25-Paneth-cells GSM116350 CELL  
 24-Paneth-cells GSM116359 CELL  
 23-Paneth-cells GSM318589 CELL  
 22-Paneth-cells GSM318590 CELL  
 21-Color-Crypt GSM480375 cel  
 20-Color-Crypt GSM480374 cel  
 19-Color-Vill GSM480363 cel  
 18-Color-Vill GSM480362 cel  
 17-Color-IEC-Gf GSM349880 CELL  
 16-Color-IEC-Gf GSM350375 CELL  
 15-Ileum-IEC-Gf GSM350376 CELL  
 14-Ileum-IEC GSM350371 CELL  
 13-Small-intestine-epithelium RMINEP002001 CELL  
 12-Small-intestine-epithelium RMINEP001001 CELL  
 11-FAE-RMPYEP001001 CELL  
 10-FAE-RMPYEP001001 CELL  
 9-Ileum-IEC GSM190797 CELL  
 8-Ileum-IEC GSM190796 CELL  
 7-Ileum-IEC GSM190795 CELL  
 6-CT-v-M-cells GSM190794 CELL  
 5-CT-v-M-cells GSM190793 CELL  
 4-CT-v-M-cells GSM190792 CELL  
 3-PP-M-cells GSM190791 CELL  
 2-PP-M-cells GSM190790 CELL  
 1-PP-M-cells GSM190789 CELL



Cluster0064\_ Extracellular matrix-related (30 nodes)

1,898.6  
1,798.7  
1,698.8  
1,598.8  
1,498.9  
1,399  
1,299.1  
1,199.1  
1,099.2  
999.3  
899.4  
799.4  
699.5  
599.6  
499.6  
399.7  
299.8  
199.9  
99.9  
0

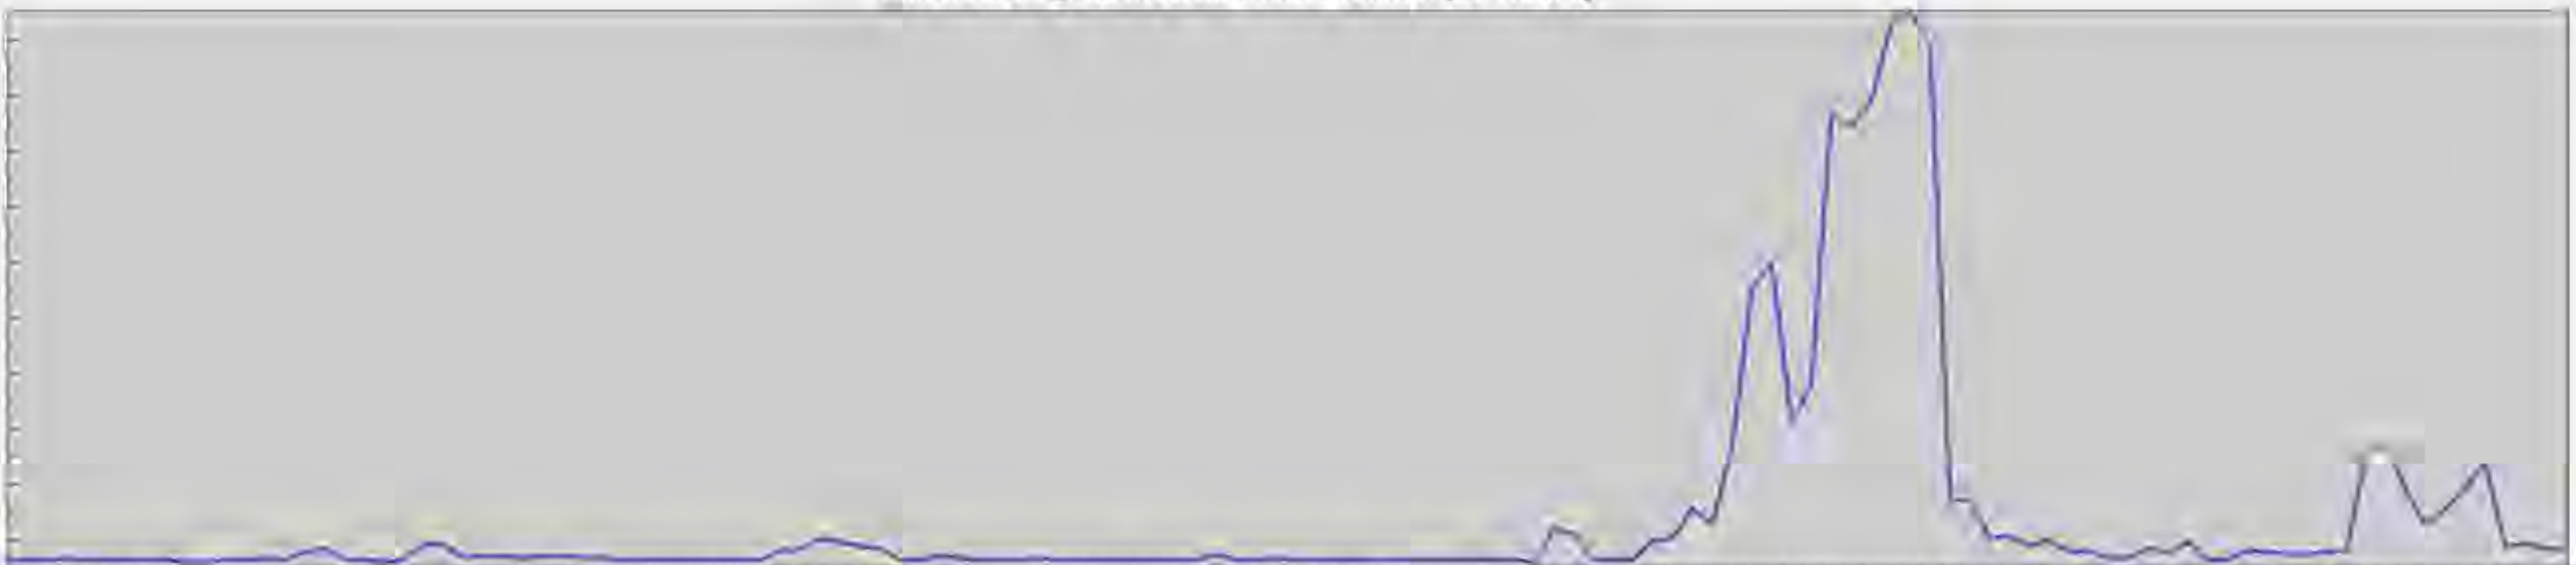

30-NALT GSM289411 CELL  
 29-NALT GSM289410 CELL  
 28-NALT GSM289409 CELL  
 27-NALT GSM289408 CELL  
 26-Color-d9 GSM1988105 CELL  
 25-Color-d9 GSM1988104 CELL  
 24-Color-d9 GSM1988103 CELL  
 23-Color-d4 GSM1988102 CELL  
 22-Color-d4 GSM1988101 CELL  
 21-Intestine-large GSM258676 CELL  
 20-Intestine-large GSM258675 CELL  
 19-Intestine-small GSM258674 CELL  
 18-Intestine-small GSM258673 CELL  
 17-Lymph-nodes GSM258672 CELL  
 16-Lymph-nodes GSM258671 CELL  
 15-Spleen GSM258767 CELL  
 14-Spleen GSM258766 CELL  
 13-Neuro2a GSM258728 CELL  
 12-Neuro2a GSM258727 CELL  
 11-Astrocytes GSM241898 CELL  
 10-mimb GSM258726 CELL  
 9-mimb GSM258725 CELL  
 8-MIMCD3 GSM258724 CELL  
 7-MIMCD3 GSM258723 CELL  
 6-Bruce4 GSM258656 CELL  
 5-Bruce4 GSM258655 CELL  
 4-C2C12 GSM258690 CELL  
 3-C2C12 GSM258689 CELL  
 2-NH3T3 GSM258739 CELL  
 1-NH3T3 GSM258738 CELL  
 100-3T3-L1 GSM258610 CELL  
 99-3T3-L1 GSM258609 CELL  
 98-10T12 GSM258632 CELL  
 97-10T12 GSM258631 CELL  
 96-Osteoblast-d21 GSM258740 CELL  
 95-Osteoblast-d14 GSM258739 CELL  
 94-Osteoblast-d14 GSM258738 CELL  
 93-Osteoblast-d14 GSM258737 CELL  
 92-Osteoblast-d5 GSM258742 CELL  
 91-Osteoblast-d5 GSM258741 CELL  
 90-Chondrocytes GSM266741 CELL  
 89-Chondrocytes GSM266740 CELL  
 88-Nat Helper cell GSM465594 CELL  
 87-Nat Helper cell GSM465593 CELL  
 86-TT cell GSM465596 CELL  
 85-MS-1 GSM234692 CELL  
 84-Lymph-endo-cells GSM143704 CELL  
 83-P-FDC GSM481977 CELL  
 82-P-FDC GSM481978 CELL  
 81-P-FDC GSM481976 CELL  
 80-L-Y RMLNDCC003001 CELL  
 79-L-Y RMLNDCC003001 CELL  
 78-Follicular-Bcells GSM258664 CELL  
 77-Follicular-Bcells GSM258663 CELL  
 76-MZ-Bcell GSM258627 CELL  
 75-MZ-Bcell GSM258627 CELL  
 74-BAF3 GSM258620 CELL  
 73-BAF3 GSM258619 CELL  
 72-Tregs GSM258778 CELL  
 71-Tregs GSM258777 CELL  
 70-T-cells-CD8+ GSM258776 CELL  
 69-T-cells-CD8+ GSM258774 CELL  
 68-T-cells-CD4+ GSM258773 CELL  
 67-T-cells-CD4+ GSM258744 CELL  
 66-Thymocyte-DN GSM465595 CELL  
 65-Osteoclasts GSM258743 CELL  
 64-Microglia GSM258721 CELL  
 63-Microglia GSM258721 CELL  
 62-MM-LPS-7h GSM258706 CELL  
 61-MM-LPS-7h GSM258706 CELL  
 60-MM-LPS-6h GSM258702 CELL  
 59-MM-LPS-6h GSM258702 CELL  
 58-MM-LPS-6h GSM258699 CELL  
 57-MM-LPS-6h GSM258699 CELL  
 56-MM-LPS-6h GSM258694 CELL  
 55-MM-LPS-6h GSM258694 CELL  
 54-Plasmacytoid-DC GSM258650 CELL  
 53-Plasmacytoid-DC GSM258649 CELL  
 52-CD8a-DC GSM258647 CELL  
 51-CD8a-DC GSM258647 CELL  
 50-CD8a+DC GSM258646 CELL  
 49-CD8a+DC GSM258646 CELL  
 48-NK-cells GSM258732 CELL  
 47-NK-cells GSM258731 CELL  
 46-Mast-cells-IgE+Ad GSM258719 CELL  
 45-Mast-cells-IgE+Ad GSM258717 CELL  
 44-Mast-cells-IgE GSM258714 CELL  
 43-Mast-cells-IgE GSM258713 CELL  
 42-Mast-cells-IgE GSM258712 CELL  
 41-Mast-cells-IgE GSM258712 CELL  
 40-Granulocytes GSM258667 CELL  
 39-Granulocytes GSM258667 CELL  
 38-GMP GSM258666 CELL  
 37-GMP GSM258666 CELL  
 36-GMP GSM258665 CELL  
 35-GMP GSM258665 CELL  
 34-MEP GSM258872 CELL  
 33-MEP GSM258871 CELL  
 32-MEP GSM258871 CELL  
 31-HESC GSM258770 CELL  
 30-HESC GSM258769 CELL  
 29-Bone marrow GSM258628 CELL  
 28-Bone marrow GSM258627 CELL  
 27-paneth-cells-GF-1 GSM116357 CELL  
 26-paneth-cells-GF-1 GSM116357 CELL  
 25-paneth-cells GSM116350 CELL  
 24-paneth-cells GSM116359 CELL  
 23-paneth-cells GSM318589 CELL  
 22-paneth-cells GSM318590 CELL  
 21-paneth-cells GSM480375 CELL  
 20-paneth-cells GSM480375 CELL  
 19-Color-Vill GSM480363 CELL  
 18-Color-Vill GSM480362 CELL  
 17-Color-IEC-GF GSM349880 CELL  
 16-Color-IEC-GF GSM350375 CELL  
 15-Color-IEC-GF GSM350375 CELL  
 14-Intestine-epithelium RMINEP002001 CELL  
 13-Intestine-epithelium RMINEP002001 CELL  
 12-Intestine-epithelium RMINEP001001 CELL  
 11-FAE-RMPYEP001001 CELL  
 10-FAE-RMPYEP001001 CELL  
 9-Ileum-IEC GSM190797 CELL  
 8-Ileum-IEC GSM190796 CELL  
 7-Ileum-IEC GSM190795 CELL  
 6-CT-v-M-cells GSM190794 CELL  
 5-CT-v-M-cells GSM190793 CELL  
 4-CT-v-M-cells GSM190792 CELL  
 3-PP-M-cells GSM190791 CELL  
 2-PP-M-cells GSM190790 CELL  
 1-PP-M-cells GSM190789 CELL



Cluster0065\_FAE and Peyer's patch M cell-related (29 nodes)

1,304.1  
1,235.5  
1,166.9  
1,098.2  
1,029.6  
960.9  
892.3  
823.7  
755  
686.4  
617.8  
549.1  
480.5  
411.8  
343.2  
274.8  
205.9  
137.3  
68.6  
0

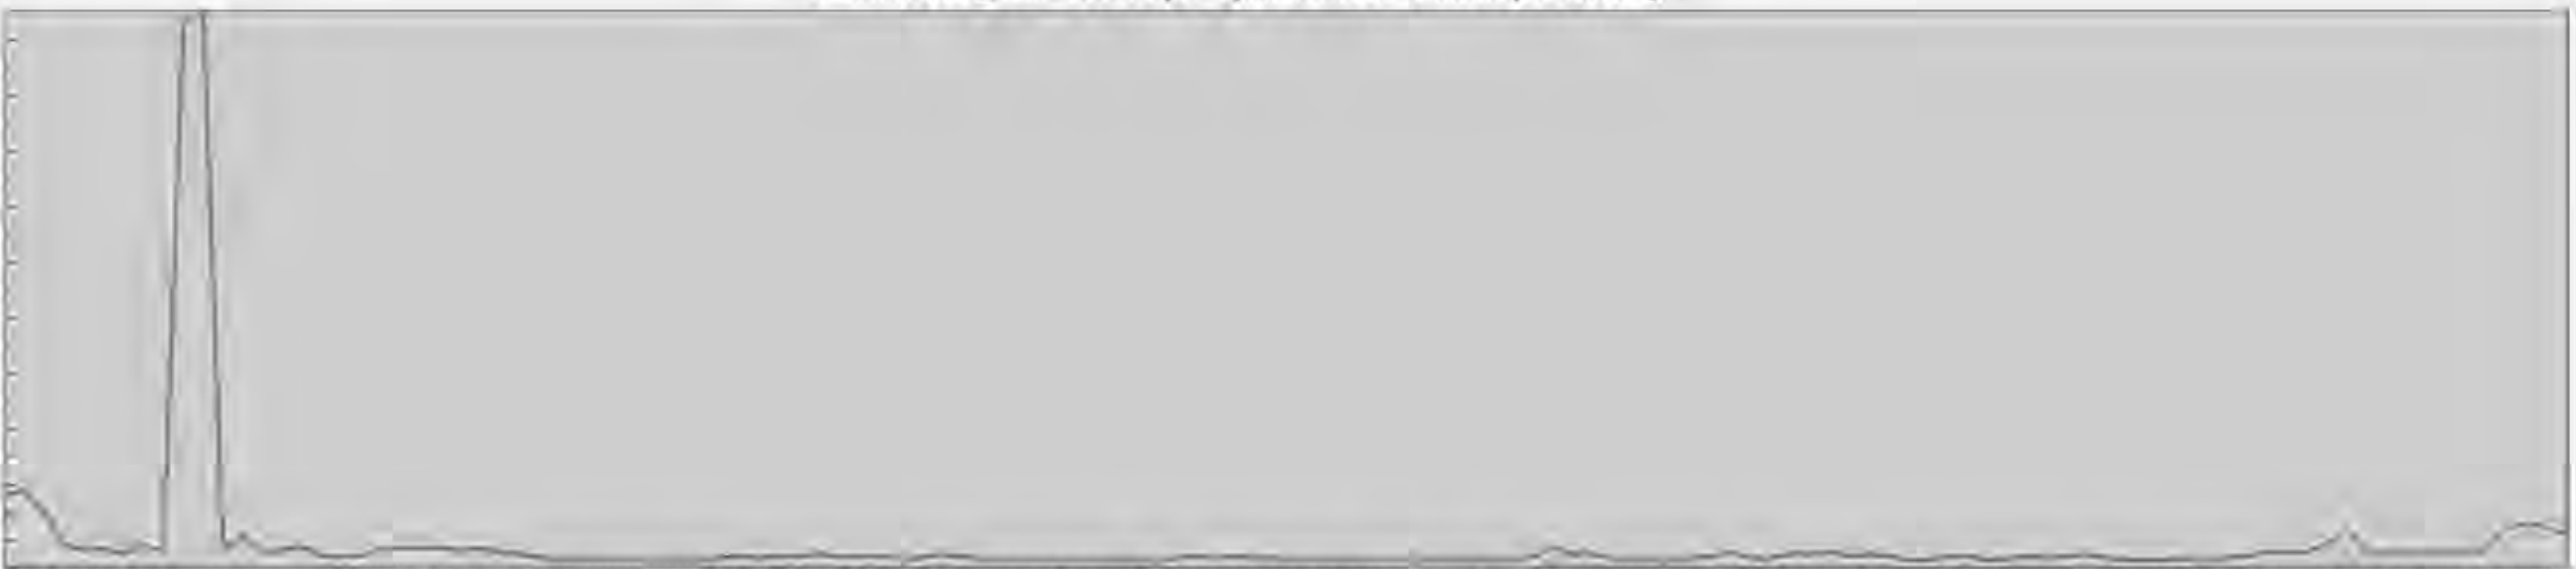

|     |                            |              |      |
|-----|----------------------------|--------------|------|
| 01  | PP-M-cells                 | GSM190789    | CEL  |
| 02  | PP-M-cells                 | GSM190790    | CEL  |
| 03  | PP-M-cells                 | GSM190791    | CEL  |
| 04  | CT-Y-M-cells               | GSM190792    | CEL  |
| 05  | CT-Y-M-cells               | GSM190793    | CEL  |
| 06  | CT-W-M-cells               | GSM190794    | CEL  |
| 07  | Ileum-IEC                  | GSM190795    | CEL  |
| 08  | Ileum-IEC                  | GSM190796    | CEL  |
| 09  | Ileum-IEC                  | GSM190797    | CEL  |
| 10  | FAE-RMP                    | GSM190798    | CEL  |
| 11  | FAE-RMP                    | GSM190799    | CEL  |
| 12  | Small-intestine-epithelium | RMINEP001001 | CEL  |
| 13  | Small-intestine-epithelium | RMINEP002001 | CEL  |
| 14  | Ileum-IEC                  | GSM350371    | CEL  |
| 15  | Ileum-IEC                  | GSM350375    | CEL  |
| 16  | Colon-Vill                 | GSM480362    | cel  |
| 17  | Colon-Vill                 | GSM480363    | cel  |
| 18  | Colon-Vill                 | GSM480364    | cel  |
| 19  | Colon-Crypt                | GSM480374    | cel  |
| 20  | Colon-Crypt                | GSM480375    | cel  |
| 21  | Colon-Crypt                | GSM480376    | cel  |
| 22  | Paneth-cells               | GSM318589    | CEL  |
| 23  | Paneth-cells               | GSM318590    | CEL  |
| 24  | Paneth-cells               | GSM116359    | CEL  |
| 25  | Paneth-cells               | GSM116360    | CEL  |
| 26  | Paneth-cells               | GSM116361    | CEL  |
| 27  | Paneth-cells               | GSM116362    | CEL  |
| 28  | Bone marrow                | GSM258677    | CEL  |
| 29  | Bone marrow                | GSM258678    | CEL  |
| 30  | NALT                       | GSM289411    | CELL |
| 31  | NALT                       | GSM289410    | CELL |
| 32  | NALT                       | GSM289409    | CELL |
| 33  | NALT                       | GSM289408    | CELL |
| 34  | Color-d9                   | GSM198810    | CELL |
| 35  | Color-d9                   | GSM198811    | CELL |
| 36  | Color-d9                   | GSM198812    | CELL |
| 37  | Color-d4                   | GSM198813    | CELL |
| 38  | Color-d4                   | GSM198814    | CELL |
| 39  | Color-d4                   | GSM198815    | CELL |
| 40  | Intestine-large            | GSM258675    | CEL  |
| 41  | Intestine-large            | GSM258676    | CEL  |
| 42  | Intestine-small            | GSM258677    | CEL  |
| 43  | Intestine-small            | GSM258678    | CEL  |
| 44  | Lymph-nodes                | GSM258679    | CEL  |
| 45  | Lymph-nodes                | GSM258680    | CEL  |
| 46  | Spleen                     | GSM258681    | CEL  |
| 47  | Spleen                     | GSM258682    | CEL  |
| 48  | Neuro2a                    | GSM241898    | CEL  |
| 49  | Neuro2a                    | GSM241899    | CEL  |
| 50  | Astrocytes                 | GSM241900    | CEL  |
| 51  | ming                       | GSM258683    | CEL  |
| 52  | ming                       | GSM258684    | CEL  |
| 53  | ming                       | GSM258685    | CEL  |
| 54  | MIMCD3                     | GSM258686    | CEL  |
| 55  | MIMCD3                     | GSM258687    | CEL  |
| 56  | MIMCD3                     | GSM258688    | CEL  |
| 57  | Bruce4                     | GSM258689    | CEL  |
| 58  | Bruce4                     | GSM258690    | CEL  |
| 59  | Bruce4                     | GSM258691    | CEL  |
| 60  | C2C12                      | GSM258692    | CEL  |
| 61  | C2C12                      | GSM258693    | CEL  |
| 62  | NH3T3                      | GSM258730    | CEL  |
| 63  | NH3T3                      | GSM258731    | CEL  |
| 64  | 3T3-L1                     | GSM258610    | CEL  |
| 65  | 3T3-L1                     | GSM258609    | CEL  |
| 66  | 10T12                      | GSM258632    | CEL  |
| 67  | 10T12                      | GSM258631    | CEL  |
| 68  | Osteoplast-d21             | GSM258740    | CEL  |
| 69  | Osteoplast-d21             | GSM258739    | CEL  |
| 70  | Osteoplast-d14             | GSM258738    | CEL  |
| 71  | Osteoplast-d14             | GSM258737    | CEL  |
| 72  | Osteoplast-d5              | GSM258742    | CEL  |
| 73  | Osteoplast-d5              | GSM258741    | CEL  |
| 74  | Chondrocytes               | GSM258674    | CEL  |
| 75  | Chondrocytes               | GSM258674    | CEL  |
| 76  | Nat Helper cell            | GSM465594    | CEL  |
| 77  | Nat Helper cell            | GSM465593    | CEL  |
| 78  | MS-1                       | GSM234692    | CEL  |
| 79  | Lymph-endo-cells           | GSM143704    | CEL  |
| 80  | FDC                        | GSM481977    | CEL  |
| 81  | FDC                        | GSM481978    | CEL  |
| 82  | FDC                        | GSM481979    | CEL  |
| 83  | FDC                        | GSM481976    | CEL  |
| 84  | FDC                        | GSM481977    | CEL  |
| 85  | FDC                        | GSM481978    | CEL  |
| 86  | FDC                        | GSM481979    | CEL  |
| 87  | FDC                        | GSM481976    | CEL  |
| 88  | FDC                        | GSM481977    | CEL  |
| 89  | FDC                        | GSM481978    | CEL  |
| 90  | FDC                        | GSM481979    | CEL  |
| 91  | FDC                        | GSM481976    | CEL  |
| 92  | FDC                        | GSM481977    | CEL  |
| 93  | FDC                        | GSM481978    | CEL  |
| 94  | FDC                        | GSM481979    | CEL  |
| 95  | FDC                        | GSM481976    | CEL  |
| 96  | FDC                        | GSM481977    | CEL  |
| 97  | FDC                        | GSM481978    | CEL  |
| 98  | FDC                        | GSM481979    | CEL  |
| 99  | FDC                        | GSM481976    | CEL  |
| 100 | FDC                        | GSM481977    | CEL  |
| 101 | FDC                        | GSM481978    | CEL  |
| 102 | FDC                        | GSM481979    | CEL  |
| 103 | FDC                        | GSM481976    | CEL  |
| 104 | FDC                        | GSM481977    | CEL  |
| 105 | FDC                        | GSM481978    | CEL  |
| 106 | FDC                        | GSM481979    | CEL  |
| 107 | FDC                        | GSM481976    | CEL  |
| 108 | FDC                        | GSM481977    | CEL  |
| 109 | FDC                        | GSM481978    | CEL  |
| 110 | FDC                        | GSM481979    | CEL  |
| 111 | FDC                        | GSM481976    | CEL  |
| 112 | FDC                        | GSM481977    | CEL  |
| 113 | FDC                        | GSM481978    | CEL  |
| 114 | FDC                        | GSM481979    | CEL  |
| 115 | FDC                        | GSM481976    | CEL  |
| 116 | FDC                        | GSM481977    | CEL  |
| 117 | FDC                        | GSM481978    | CEL  |
| 118 | FDC                        | GSM481979    | CEL  |
| 119 | FDC                        | GSM481976    | CEL  |
| 120 | FDC                        | GSM481977    | CEL  |
| 121 | FDC                        | GSM481978    | CEL  |
| 122 | FDC                        | GSM481979    | CEL  |
| 123 | FDC                        | GSM481976    | CEL  |
| 124 | FDC                        | GSM481977    | CEL  |
| 125 | FDC                        | GSM481978    | CEL  |
| 126 | FDC                        | GSM481979    | CEL  |
| 127 | FDC                        | GSM481976    | CEL  |
| 128 | FDC                        | GSM481977    | CEL  |
| 129 | FDC                        | GSM481978    | CEL  |
| 130 | FDC                        | GSM481979    | CEL  |



Cluster0066\_House keeping-cell cycle (29 nodes)

1,037  
982.4  
927.8  
873.2  
818.7  
764.1  
709.5  
654.9  
600.3  
545.8  
491.2  
436.6  
382  
327.5  
272.9  
218.3  
163.7  
109.2  
54.6  
0

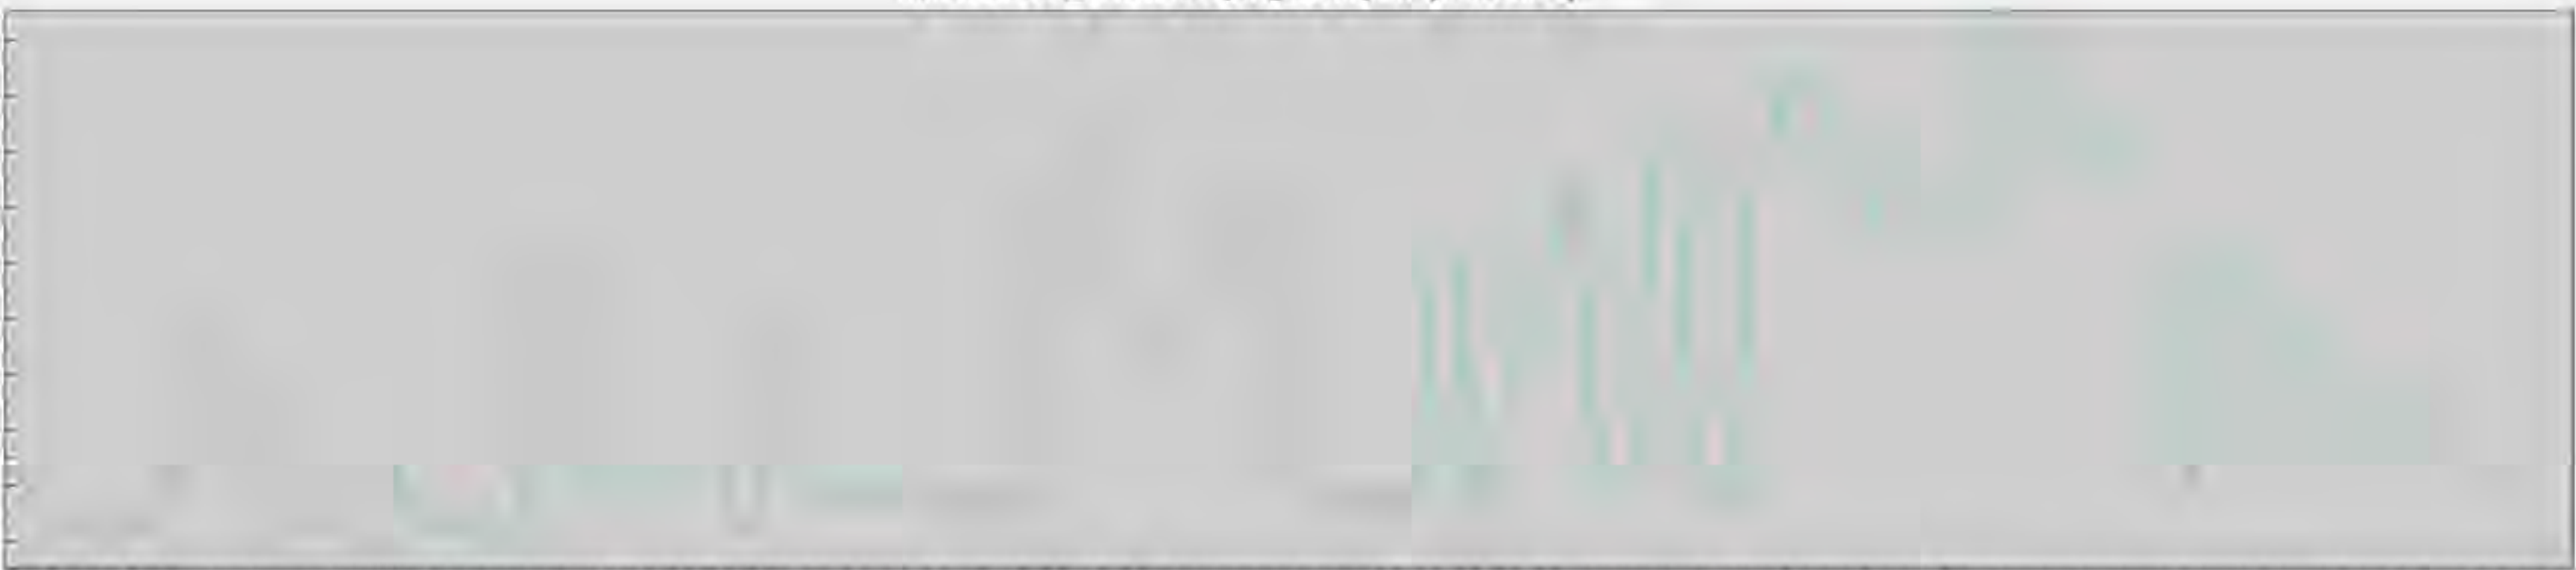

|                             |                             |                             |                               |                               |                               |                            |                            |                            |                          |                          |                                                |                                                |                            |                            |                               |                             |                             |                              |                              |                               |                               |                               |                               |                                    |                                    |                              |                              |                      |                      |                      |                      |                      |                      |                      |                      |                      |                               |                             |                             |                                |                                |                                   |                                   |                           |                           |                          |                          |                          |                          |                                  |                                  |                      |                      |                             |                             |                      |                      |                        |                        |                            |                            |                              |                              |                               |                              |                              |                              |                              |                        |                        |                       |                       |                           |                           |                                    |                                    |                           |                           |                         |                         |                         |                                   |                       |                         |                                  |                                  |                               |                               |                                |                                |                                 |                                 |                                 |                                 |                        |                        |                         |                          |                         |                         |                         |                         |                          |                          |                          |                        |                        |                              |                           |                          |                          |                               |                               |                               |                                   |                                   |                                   |                                   |                            |                            |                            |                            |                        |                        |                        |                        |
|-----------------------------|-----------------------------|-----------------------------|-------------------------------|-------------------------------|-------------------------------|----------------------------|----------------------------|----------------------------|--------------------------|--------------------------|------------------------------------------------|------------------------------------------------|----------------------------|----------------------------|-------------------------------|-----------------------------|-----------------------------|------------------------------|------------------------------|-------------------------------|-------------------------------|-------------------------------|-------------------------------|------------------------------------|------------------------------------|------------------------------|------------------------------|----------------------|----------------------|----------------------|----------------------|----------------------|----------------------|----------------------|----------------------|----------------------|-------------------------------|-----------------------------|-----------------------------|--------------------------------|--------------------------------|-----------------------------------|-----------------------------------|---------------------------|---------------------------|--------------------------|--------------------------|--------------------------|--------------------------|----------------------------------|----------------------------------|----------------------|----------------------|-----------------------------|-----------------------------|----------------------|----------------------|------------------------|------------------------|----------------------------|----------------------------|------------------------------|------------------------------|-------------------------------|------------------------------|------------------------------|------------------------------|------------------------------|------------------------|------------------------|-----------------------|-----------------------|---------------------------|---------------------------|------------------------------------|------------------------------------|---------------------------|---------------------------|-------------------------|-------------------------|-------------------------|-----------------------------------|-----------------------|-------------------------|----------------------------------|----------------------------------|-------------------------------|-------------------------------|--------------------------------|--------------------------------|---------------------------------|---------------------------------|---------------------------------|---------------------------------|------------------------|------------------------|-------------------------|--------------------------|-------------------------|-------------------------|-------------------------|-------------------------|--------------------------|--------------------------|--------------------------|------------------------|------------------------|------------------------------|---------------------------|--------------------------|--------------------------|-------------------------------|-------------------------------|-------------------------------|-----------------------------------|-----------------------------------|-----------------------------------|-----------------------------------|----------------------------|----------------------------|----------------------------|----------------------------|------------------------|------------------------|------------------------|------------------------|
| 01-PP-M-cells_GSM190789.CEL | 02-PP-M-cells_GSM190790.CEL | 03-PP-M-cells_GSM190791.CEL | 04-CT-v-M-cells_GSM190792.CEL | 05-CT-v-M-cells_GSM190793.CEL | 06-CT-v-M-cells_GSM190794.CEL | 07-Ileum-IEC_GSM190795.CEL | 08-Ileum-IEC_GSM190796.CEL | 09-Ileum-IEC_GSM190797.CEL | 10-FAE-RMPYE_P001001.CEL | 11-FAE-RMPYE_P002001.CEL | 12-Small-intestine-epithelium_RMINEP001001.CEL | 13-Small-intestine-epithelium_RMINEP002001.CEL | 14-Ileum-IEC_GSM350371.CEL | 15-Ileum-IEC_GSM350375.CEL | 16-Color-IEC-Gf_GSM349880.CEL | 18-Color-Vill-GSM480362.CEL | 19-Color-Vill-GSM480363.CEL | 20-Color-Crypt-GSM480374.CEL | 21-Color-Crypt-GSM480375.CEL | 22-Paneth-cells_GSM318590.CEL | 23-Paneth-cells_GSM318589.CEL | 24-Paneth-cells_GSM116359.CEL | 25-Paneth-cells_GSM116350.CEL | 26-Paneth-cells-Gf-1-GSM116357.CEL | 27-Paneth-cells-Gf-1-GSM116358.CEL | 28-Bone marrow_GSM258827.CEL | 29-Bone marrow_GSM258828.CEL | 30-HSC-GSM258770.CEL | 31-HSC-GSM258771.CEL | 32-MEP-GSM258772.CEL | 33-MEP-GSM258773.CEL | 34-MEP-GSM258774.CEL | 35-MEP-GSM258775.CEL | 36-MEP-GSM258776.CEL | 37-MEP-GSM258777.CEL | 38-MEP-GSM258778.CEL | 39-Granulocytes_GSM258667.CEL | 40-Mast-cells_GSM258712.CEL | 41-Mast-cells_GSM258711.CEL | 42-Mast-cells-Gf-GSM258714.CEL | 43-Mast-cells-Gf-GSM258713.CEL | 44-Mast-cells-Gf+Ad-GSM258718.CEL | 45-Mast-cells-Gf+Ad-GSM258717.CEL | 46-NK-cells_GSM258731.CEL | 47-NK-cells_GSM258732.CEL | 48-CD8a+DC_GSM258646.CEL | 49-CD8a+DC_GSM258645.CEL | 50-CD8a-DC-GSM258647.CEL | 51-CD8a-DC-GSM258647.CEL | 52-Plasmacytoid-DC-GSM258649.CEL | 53-Plasmacytoid-DC-GSM258650.CEL | 54-BMM-GSM258694.CEL | 55-BMM-GSM258694.CEL | 56-BMM-LPS-6h-GSM258699.CEL | 57-BMM-LPS-6h-GSM258699.CEL | 58-BMM-GSM258702.CEL | 59-BMM-GSM258701.CEL | 60-PP-7h-GSM258706.CEL | 61-PP-7h-GSM258705.CEL | 62-Microglia-GSM258721.CEL | 63-Microglia-GSM258721.CEL | 64-Osteoclasts-GSM258743.CEL | 65-Osteoclasts-GSM258744.CEL | 66-Thymocyte-DN-GSM465595.CEL | 67-T-cells-CD4+GSM258773.CEL | 68-T-cells-CD4+GSM258773.CEL | 69-T-cells-CD8+GSM258774.CEL | 70-T-cells-CD8+GSM258774.CEL | 71-Tregs-GSM258778.CEL | 72-Tregs-GSM258778.CEL | 73-BAF3-GSM258620.CEL | 74-BAF3-GSM258620.CEL | 75-MZ-Bcell-GSM258621.CEL | 76-MZ-Bcell-GSM258621.CEL | 77-Follicular-Bcells-GSM258664.CEL | 78-Follicular-Bcells-GSM258664.CEL | 79-E-L-Y-RMLNDC002001.CEL | 80-E-L-Y-RMLNDC003001.CEL | 81-PP-FDC-GSM481976.CEL | 82-PP-FDC-GSM481978.CEL | 83-PP-FDC-GSM481977.CEL | 84-Lymph-endo-cells_GSM143704.CEL | 85-MS-1_GSM234692.CEL | 86-LTcell_GSM465596.CEL | 87-Nat Helper cell_GSM465593.CEL | 88-Nat Helper cell_GSM465594.CEL | 89-Chondrocytes_GSM266741.CEL | 90-Chondrocytes_GSM266740.CEL | 91-Osteoblast-d5-GSM258741.CEL | 92-Osteoblast-d5-GSM258742.CEL | 93-Osteoblast-d14-GSM258737.CEL | 94-Osteoblast-d14-GSM258738.CEL | 95-Osteoblast-d21-GSM258740.CEL | 96-Osteoblast-d21-GSM258739.CEL | 97-10T12-GSM258631.CEL | 98-10T12-GSM258632.CEL | 99-3T3-L1-GSM258610.CEL | 100-3T3-L1-GSM258609.CEL | 101-NH3T3-GSM258739.CEL | 102-NH3T3-GSM258739.CEL | 103-C2C12-GSM258629.CEL | 104-C2C12-GSM258630.CEL | 106-Bruce4-GSM258666.CEL | 107-MIMCD3-GSM258723.CEL | 108-MIMCD3-GSM258724.CEL | 109-mim6-GSM258725.CEL | 110-mim6-GSM258726.CEL | 111-Astrocytes_GSM241898.CEL | 112-Neuro2a-GSM258727.CEL | 113-Spleen-GSM258767.CEL | 114-Spleen-GSM258767.CEL | 115-Lymph-nodes-GSM258691.CEL | 116-Lymph-nodes-GSM258691.CEL | 117-Lymph-nodes-GSM258676.CEL | 118-Intestine-small-GSM258677.CEL | 119-Intestine-small-GSM258678.CEL | 120-Intestine-large-GSM258675.CEL | 121-Intestine-large-GSM258676.CEL | 122-Color-d4-GSM198810.CEL | 123-Color-d4-GSM198810.CEL | 124-Color-d9-GSM198810.CEL | 125-Color-d9-GSM198810.CEL | 126-NALT-GSM289408.CEL | 127-NALT-GSM289409.CEL | 128-NALT-GSM289410.CEL | 129-NALT-GSM289411.CEL |
|-----------------------------|-----------------------------|-----------------------------|-------------------------------|-------------------------------|-------------------------------|----------------------------|----------------------------|----------------------------|--------------------------|--------------------------|------------------------------------------------|------------------------------------------------|----------------------------|----------------------------|-------------------------------|-----------------------------|-----------------------------|------------------------------|------------------------------|-------------------------------|-------------------------------|-------------------------------|-------------------------------|------------------------------------|------------------------------------|------------------------------|------------------------------|----------------------|----------------------|----------------------|----------------------|----------------------|----------------------|----------------------|----------------------|----------------------|-------------------------------|-----------------------------|-----------------------------|--------------------------------|--------------------------------|-----------------------------------|-----------------------------------|---------------------------|---------------------------|--------------------------|--------------------------|--------------------------|--------------------------|----------------------------------|----------------------------------|----------------------|----------------------|-----------------------------|-----------------------------|----------------------|----------------------|------------------------|------------------------|----------------------------|----------------------------|------------------------------|------------------------------|-------------------------------|------------------------------|------------------------------|------------------------------|------------------------------|------------------------|------------------------|-----------------------|-----------------------|---------------------------|---------------------------|------------------------------------|------------------------------------|---------------------------|---------------------------|-------------------------|-------------------------|-------------------------|-----------------------------------|-----------------------|-------------------------|----------------------------------|----------------------------------|-------------------------------|-------------------------------|--------------------------------|--------------------------------|---------------------------------|---------------------------------|---------------------------------|---------------------------------|------------------------|------------------------|-------------------------|--------------------------|-------------------------|-------------------------|-------------------------|-------------------------|--------------------------|--------------------------|--------------------------|------------------------|------------------------|------------------------------|---------------------------|--------------------------|--------------------------|-------------------------------|-------------------------------|-------------------------------|-----------------------------------|-----------------------------------|-----------------------------------|-----------------------------------|----------------------------|----------------------------|----------------------------|----------------------------|------------------------|------------------------|------------------------|------------------------|







Cluster0068\_High in NIH3T3 embryonic fibroblasts (29 nodes)

2,623.2  
2,390.4  
2,257.6  
2,124.8  
1,992  
1,859.2  
1,726.4  
1,593.6  
1,460.8  
1,328  
1,195.2  
1,062.4  
929.6  
796.8  
664  
531.2  
398.4  
265.6  
132.8  
0

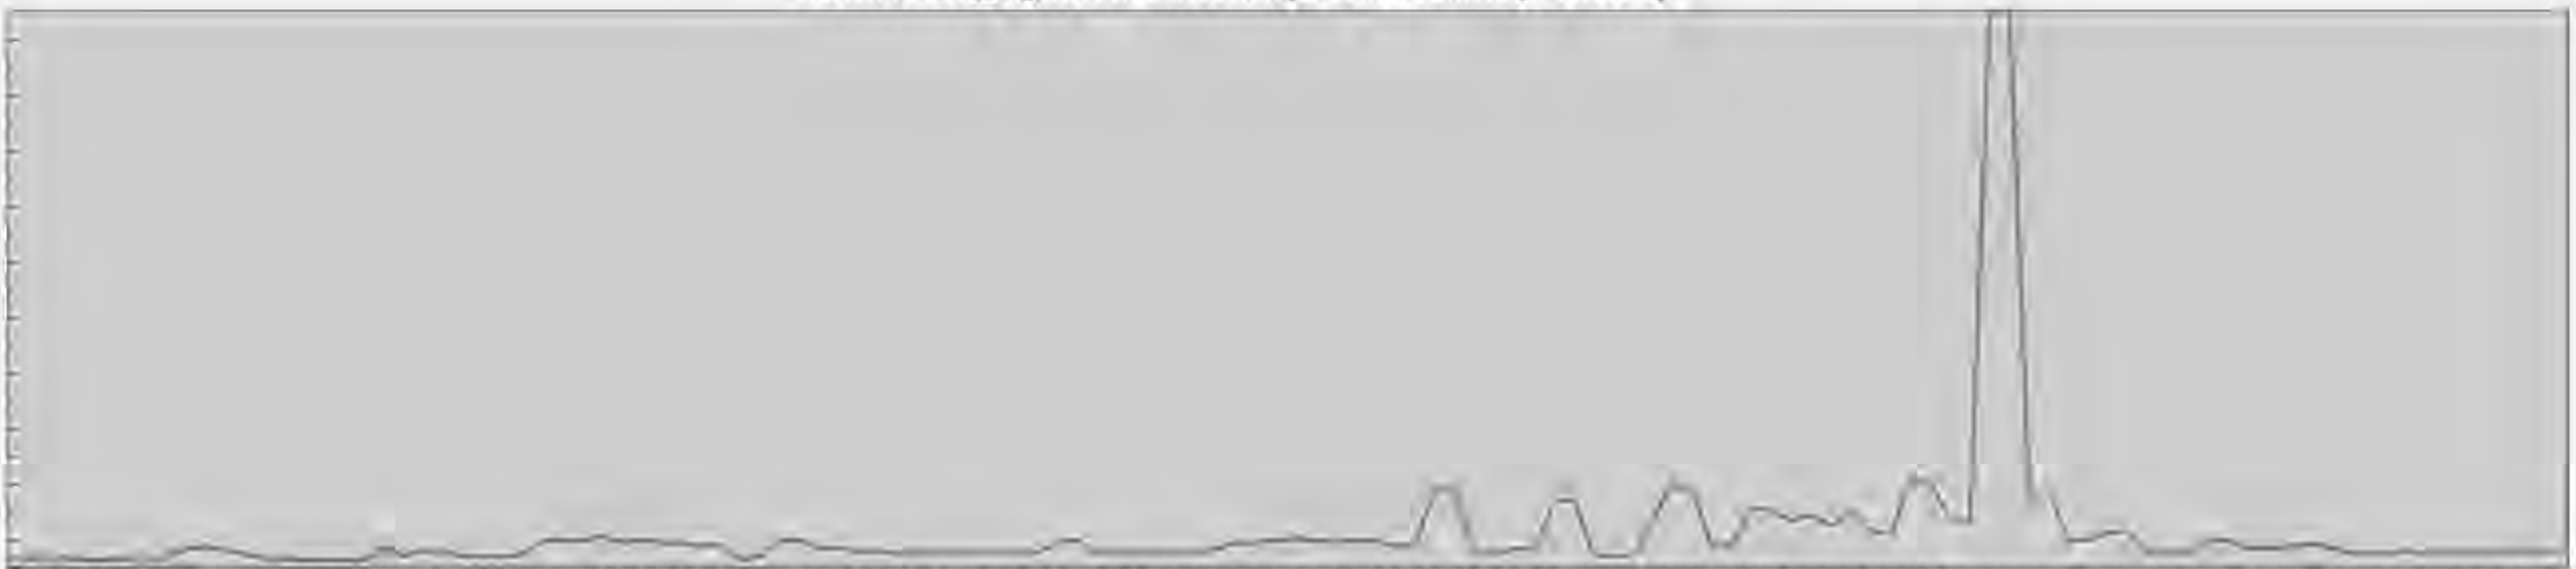

30-NALT GSM289411 CELL  
 129-NALT GSM289410 CELL  
 128-NALT GSM289409 CELL  
 127-NALT GSM289408 CELL  
 126-Color-d9 GSM1988105 CELL  
 125-Color-d9 GSM1988104 CELL  
 124-Color-d9 GSM1988103 CELL  
 123-Color-d4 GSM1988102 CELL  
 122-Color-d4 GSM1988101 CELL  
 121-Intestine-large GSM258676 CELL  
 120-Intestine-large GSM258675 CELL  
 119-Intestine-small GSM258678 CELL  
 118-Intestine-small GSM258679 CELL  
 117-Lymph-nodes GSM258691 CELL  
 116-Lymph-nodes GSM258726 CELL  
 115-Spleen GSM258767 CELL  
 114-Spleen GSM258767 CELL  
 113-Neuro2a GSM258728 CELL  
 112-Neuro2a GSM258727 CELL  
 111-Astrocytes GSM241898 CELL  
 110-mimb GSM258725 CELL  
 109-mimb GSM258725 CELL  
 108-MIMCD3 GSM258724 CELL  
 107-MIMCD3 GSM258723 CELL  
 106-Bruce4 GSM258656 CELL  
 105-Bruce4 GSM258656 CELL  
 104-C2C12 GSM258690 CELL  
 103-C2C12 GSM258689 CELL  
 102-NH3T3 GSM258730 CELL  
 101-NH3T3 GSM258729 CELL  
 100-3T3-L1 GSM258610 CELL  
 99-3T3-L1 GSM258609 CELL  
 98-10T12 GSM258632 CELL  
 97-10T12 GSM258631 CELL  
 96-Osteoblast-d21 GSM258740 CELL  
 95-Osteoblast-d21 GSM258739 CELL  
 94-Osteoblast-d14 GSM258738 CELL  
 93-Osteoblast-d14 GSM258737 CELL  
 92-Osteoblast-d5 GSM258742 CELL  
 91-Osteoblast-d5 GSM258741 CELL  
 90-Chondrocytes GSM266741 CELL  
 89-Chondrocytes GSM266740 CELL  
 88-Nat Helper cell GSM465594 CELL  
 87-Nat Helper cell GSM465593 CELL  
 86-T cell GSM465596 CELL  
 85-MS-1 GSM234692 CELL  
 84-Lymph-endo-cells GSM143704 CELL  
 83-P-FDC GSM481977 CELL  
 82-P-FDC GSM481978 CELL  
 81-P-FDC GSM481976 CELL  
 80-F-LY RMLNDCC003001 CELL  
 79-F-LY RMLNDCC003001 CELL  
 78-Follicular-Bcells GSM258664 CELL  
 77-Follicular-Bcells GSM258663 CELL  
 76-MZ-Bcell GSM258627 CELL  
 75-MZ-Bcell GSM258627 CELL  
 74-BAF3 GSM258620 CELL  
 73-BAF3 GSM258619 CELL  
 72-Tregs GSM258778 CELL  
 71-Tregs GSM258777 CELL  
 70-T-cells-CD8+ GSM258776 CELL  
 69-T-cells-CD8+ GSM258774 CELL  
 68-T-cells-CD4+ GSM258773 CELL  
 67-T-cells-CD4+ GSM258744 CELL  
 66-Thymocyte-DN GSM465595 CELL  
 65-Osteoclasts GSM258743 CELL  
 64-Osteoclasts GSM258743 CELL  
 63-Microglia GSM258721 CELL  
 62-Microglia GSM258721 CELL  
 61-MM-LPS-7h GSM258705 CELL  
 60-MM-LPS-7h GSM258705 CELL  
 59-MM-LPS-6h GSM258702 CELL  
 58-MM-LPS-6h GSM258702 CELL  
 57-MM-LPS-6h GSM258699 CELL  
 56-MM-LPS-6h GSM258699 CELL  
 55-MM-LPS-6h GSM258694 CELL  
 54-MM-LPS-6h GSM258694 CELL  
 53-Ismacryoid-DC GSM258650 CELL  
 52-Ismacryoid-DC GSM258649 CELL  
 51-CD8a-DC GSM258648 CELL  
 50-CD8a-DC GSM258647 CELL  
 49-CD8a+DC GSM258646 CELL  
 48-CD8a+DC GSM258646 CELL  
 47-NK-cells GSM258732 CELL  
 46-NK-cells GSM258731 CELL  
 45-Mast-cells-IgE+Ad GSM258718 CELL  
 44-Mast-cells-IgE+Ad GSM258717 CELL  
 43-Mast-cells-IgE GSM258714 CELL  
 42-Mast-cells-IgE GSM258713 CELL  
 41-Mast-cells GSM258712 CELL  
 40-Granulocytes GSM258668 CELL  
 39-Granulocytes GSM258667 CELL  
 38-GMP GSM258666 CELL  
 37-GMP GSM258665 CELL  
 36-GMP GSM258664 CELL  
 35-GMP GSM258642 CELL  
 34-MIEP GSM258642 CELL  
 33-MIEP GSM258641 CELL  
 32-MIEP GSM258641 CELL  
 31-HESC GSM258770 CELL  
 30-HESC GSM258770 CELL  
 29-Bone marrow GSM258628 CELL  
 28-Bone marrow GSM258627 CELL  
 27-paneth-cells-GE GSM116358 CELL  
 26-paneth-cells-GE GSM116357 CELL  
 25-paneth-cells GSM116350 CELL  
 24-paneth-cells GSM116359 CELL  
 23-paneth-cells GSM318589 CELL  
 22-paneth-cells GSM318590 CELL  
 21-paneth-cells GSM480375 CELL  
 20-Color-Crypt GSM480374 CELL  
 19-Color-Vill GSM480363 CELL  
 18-Color-Vill GSM480362 CELL  
 17-Color-IEC-Gf GSM349880 CELL  
 16-Color-IEC-Gf GSM350375 CELL  
 15-Ileum-IEC-Gf GSM350376 CELL  
 14-Ileum-IEC GSM350371 CELL  
 13-Small-intestine-epithelium RMINEP002901 CELL  
 12-Small-intestine-epithelium RMINEP001001 CELL  
 11-FAE-RMPYEP001001 CELL  
 10-FAE-RMPYEP001001 CELL  
 9-Ileum-IEC GSM190797 CELL  
 8-Ileum-IEC GSM190796 CELL  
 7-Ileum-IEC GSM190795 CELL  
 6-CT-w-M-cells GSM190794 CELL  
 5-CT-w-M-cells GSM190793 CELL  
 4-CT-y-M-cells GSM190792 CELL  
 03-PP-M-cells GSM190791 CELL  
 02-PP-M-cells GSM190790 CELL  
 01-PP-M-cells GSM190789 CELL



Cluster0069\_Osteoblast-related (29 nodes)

792.3  
750.8  
708.9  
667.0  
625.5  
583.8  
542.1  
500.4  
458.7  
417  
375.3  
333.6  
291.9  
250.2  
208.5  
166.8  
125.1  
83.4  
41.7  
0

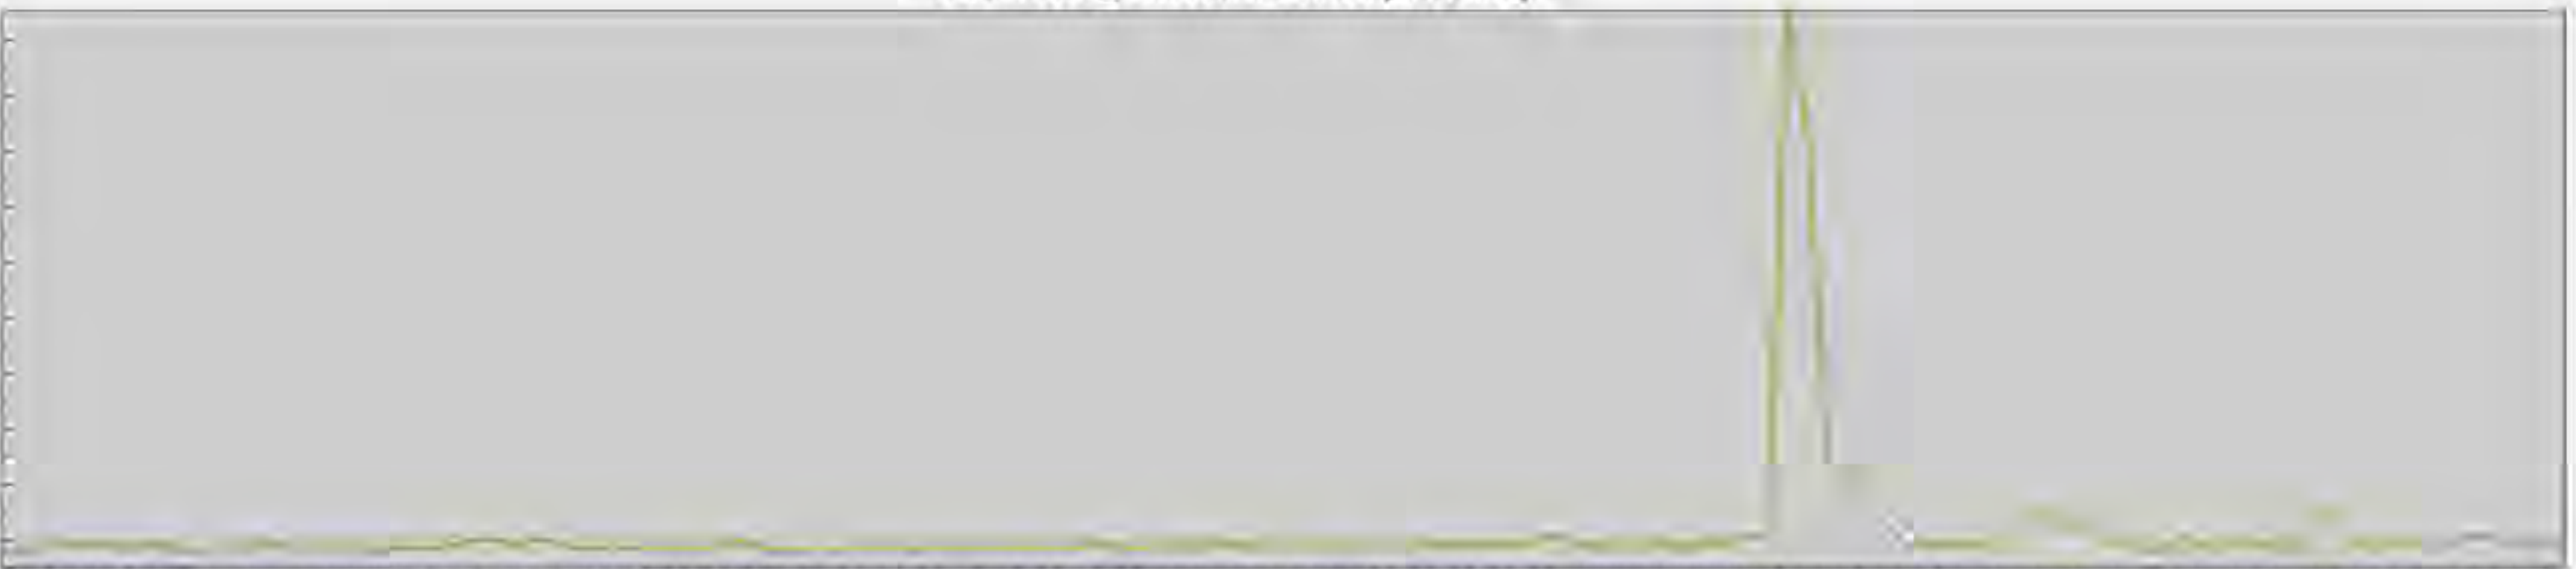

30-NAT GSM289411 CELL  
 129-NAT GSM289410 CELL  
 128-NAT GSM289409 CELL  
 127-NAT GSM289408 CELL  
 126-Color-d9 GSM1988105 CELL  
 125-Color-d9 GSM1988104 CELL  
 124-Color-d9 GSM1988103 CELL  
 123-Color-d4 GSM1988102 CELL  
 122-Color-d4 GSM1988101 CELL  
 121-Intestine-large GSM258676 CELL  
 120-Intestine-large GSM258675 CELL  
 119-Intestine-small GSM258674 CELL  
 118-Intestine-small GSM258673 CELL  
 117-Lymph-nodes GSM258672 CELL  
 116-Lymph-nodes GSM258671 CELL  
 115-Spleen GSM258767 CELL  
 114-Spleen GSM258766 CELL  
 113-Neuro2a GSM258728 CELL  
 112-Neuro2a GSM258727 CELL  
 111-Astrocytes GSM241898 CELL  
 110-mimb GSM258726 CELL  
 109-mimb GSM258725 CELL  
 108-MIMCD3 GSM258724 CELL  
 107-MIMCD3 GSM258723 CELL  
 106-Bruce4 GSM258656 CELL  
 105-Bruce4 GSM258655 CELL  
 104-C2C12 GSM258690 CELL  
 103-C2C12 GSM258689 CELL  
 102-NH3T3 GSM258730 CELL  
 101-NH3T3 GSM258729 CELL  
 100-3T3-L1 GSM258610 CELL  
 99-3T3-L1 GSM258609 CELL  
 98-10T1/2 GSM258632 CELL  
 97-10T1/2 GSM258631 CELL  
 96-Osteoblast-d21 GSM258740 CELL  
 95-Osteoblast-d21 GSM258739 CELL  
 94-Osteoblast-d14 GSM258738 CELL  
 93-Osteoblast-d14 GSM258737 CELL  
 92-Osteoblast-d5 GSM258742 CELL  
 91-Osteoblast-d5 GSM258741 CELL  
 90-Chondrocytes GSM266741 CELL  
 89-Chondrocytes GSM266740 CELL  
 88-Nat Helper cell GSM465594 CELL  
 87-Nat Helper cell GSM465593 CELL  
 86-TT cell GSM465596 CELL  
 85-MS-1 GSM234692 CELL  
 84-Lymph-endo-cells GSM143704 CELL  
 83-P-FDC GSM481977 CELL  
 82-P-FDC GSM481978 CELL  
 81-P-FDC GSM481976 CELL  
 80-L-Y RMLNDCC003001 CELL  
 79-L-Y RMLNDCC003001 CELL  
 78-Follicular-Bcells GSM258664 CELL  
 77-Follicular-Bcells GSM258663 CELL  
 76-MZ-Bcell GSM258627 CELL  
 75-MZ-Bcell GSM258627 CELL  
 74-BAF3 GSM258620 CELL  
 73-BAF3 GSM258619 CELL  
 72-Tregs GSM258778 CELL  
 71-Tregs GSM258777 CELL  
 70-T-cells-CD8+ GSM258776 CELL  
 69-T-cells-CD8+ GSM258774 CELL  
 68-T-cells-CD4+ GSM258773 CELL  
 67-T-cells-CD4+ GSM258773 CELL  
 66-Thymocyte-DN GSM465595 CELL  
 65-Osteoclasts GSM258743 CELL  
 64-Osteoclasts GSM258743 CELL  
 63-Microglia GSM258721 CELL  
 62-Microglia GSM258721 CELL  
 61-MM-LPS-7h GSM258705 CELL  
 60-MM-LPS-7h GSM258705 CELL  
 59-MM-LPS-6h GSM258702 CELL  
 58-MM-LPS-6h GSM258702 CELL  
 57-MM-LPS-6h GSM258699 CELL  
 56-MM-LPS-6h GSM258699 CELL  
 55-MM-LPS-6h GSM258694 CELL  
 54-MM-LPS-6h GSM258694 CELL  
 53-Ismacryoid-DC GSM258650 CELL  
 52-Ismacryoid-DC GSM258649 CELL  
 51-CD8a-DC GSM258648 CELL  
 50-CD8a-DC GSM258647 CELL  
 49-CD8a+DC GSM258646 CELL  
 48-CD8a+DC GSM258646 CELL  
 47-NK-cells GSM258732 CELL  
 46-NK-cells GSM258731 CELL  
 45-Mast-cells-IgE+Ad GSM258718 CELL  
 44-Mast-cells-IgE+Ad GSM258717 CELL  
 43-Mast-cells-IgE GSM258714 CELL  
 42-Mast-cells-IgE GSM258713 CELL  
 41-Mast-cells GSM258712 CELL  
 40-Granulocytes GSM258668 CELL  
 39-Granulocytes GSM258667 CELL  
 38-MP GSM258666 CELL  
 37-MP GSM258665 CELL  
 36-MP GSM258665 CELL  
 35-MP GSM258642 CELL  
 34-MEP GSM258642 CELL  
 33-MEP GSM258770 CELL  
 32-MEP GSM258770 CELL  
 31-HESC GSM258770 CELL  
 30-HESC GSM258769 CELL  
 29-Bone marrow GSM258628 CELL  
 28-Bone marrow GSM258627 CELL  
 27-paneth-cells-GE GSM116357 CELL  
 26-paneth-cells-GE GSM116357 CELL  
 25-paneth-cells GSM116350 CELL  
 24-paneth-cells GSM116359 CELL  
 23-paneth-cells GSM318589 CELL  
 22-paneth-cells GSM318590 CELL  
 21-paneth-cells GSM480375 CELL  
 20-Color-Crypt GSM480374 CELL  
 19-Color-Vill GSM480363 CELL  
 18-Color-Vill GSM480362 CELL  
 17-Color-IEC-GE GSM349880 CELL  
 16-Color-IEC-GE GSM350375 CELL  
 15-Ileum-IEC-TGF GSM350376 CELL  
 14-Ileum-IEC GSM350371 CELL  
 13-Small-intestine-epithelium RMINEP002001 CELL  
 12-Small-intestine-epithelium RMINEP001001 CELL  
 11-FAE-RMPYEP001001 CELL  
 10-FAE-RMPYEP001001 CELL  
 09-Ileum-IEC GSM190797 CELL  
 08-Ileum-IEC GSM190796 CELL  
 07-Ileum-IEC GSM190795 CELL  
 06-CT-w-M-cells GSM190794 CELL  
 05-CT-y-M-cells GSM190793 CELL  
 04-CT-y-M-cells GSM190792 CELL  
 03-PP-M-cells GSM190791 CELL  
 02-PP-M-cells GSM190790 CELL  
 01-PP-M-cells GSM190789 CELL



Cluster0070\_intestine-related (29 nodes)

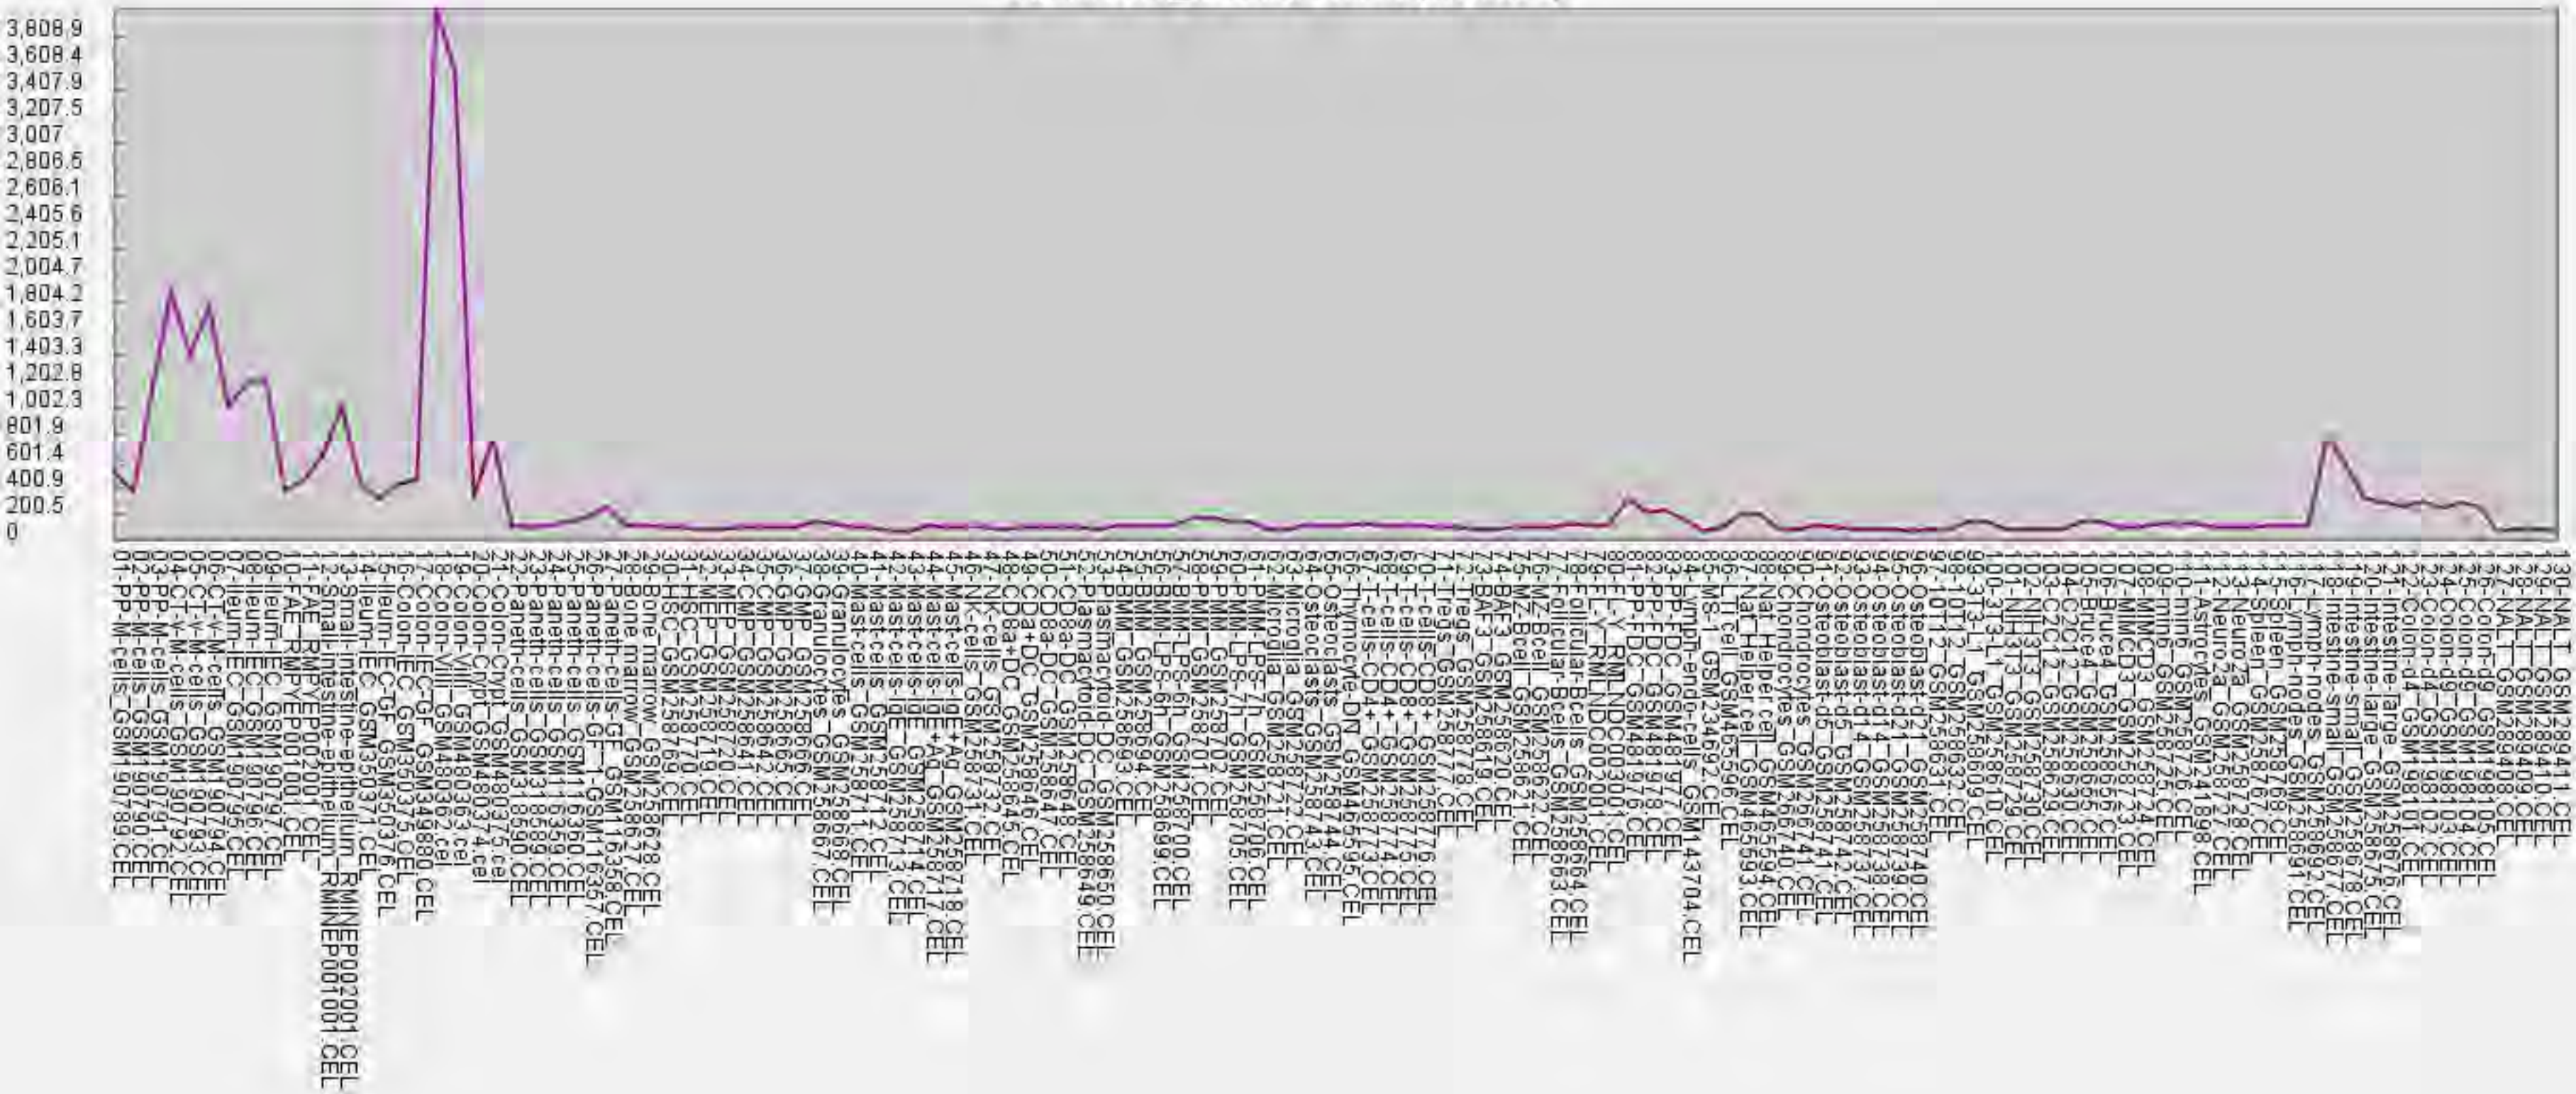



Cluster0071\_High in caecum (29 nodes)

452.8  
428.9  
405.1  
381.3  
357.4  
333.6  
309.8  
286  
262.1  
238.3  
214.5  
190.8  
166.8  
143  
119.1  
95.3  
71.5  
47.7  
23.8  
0

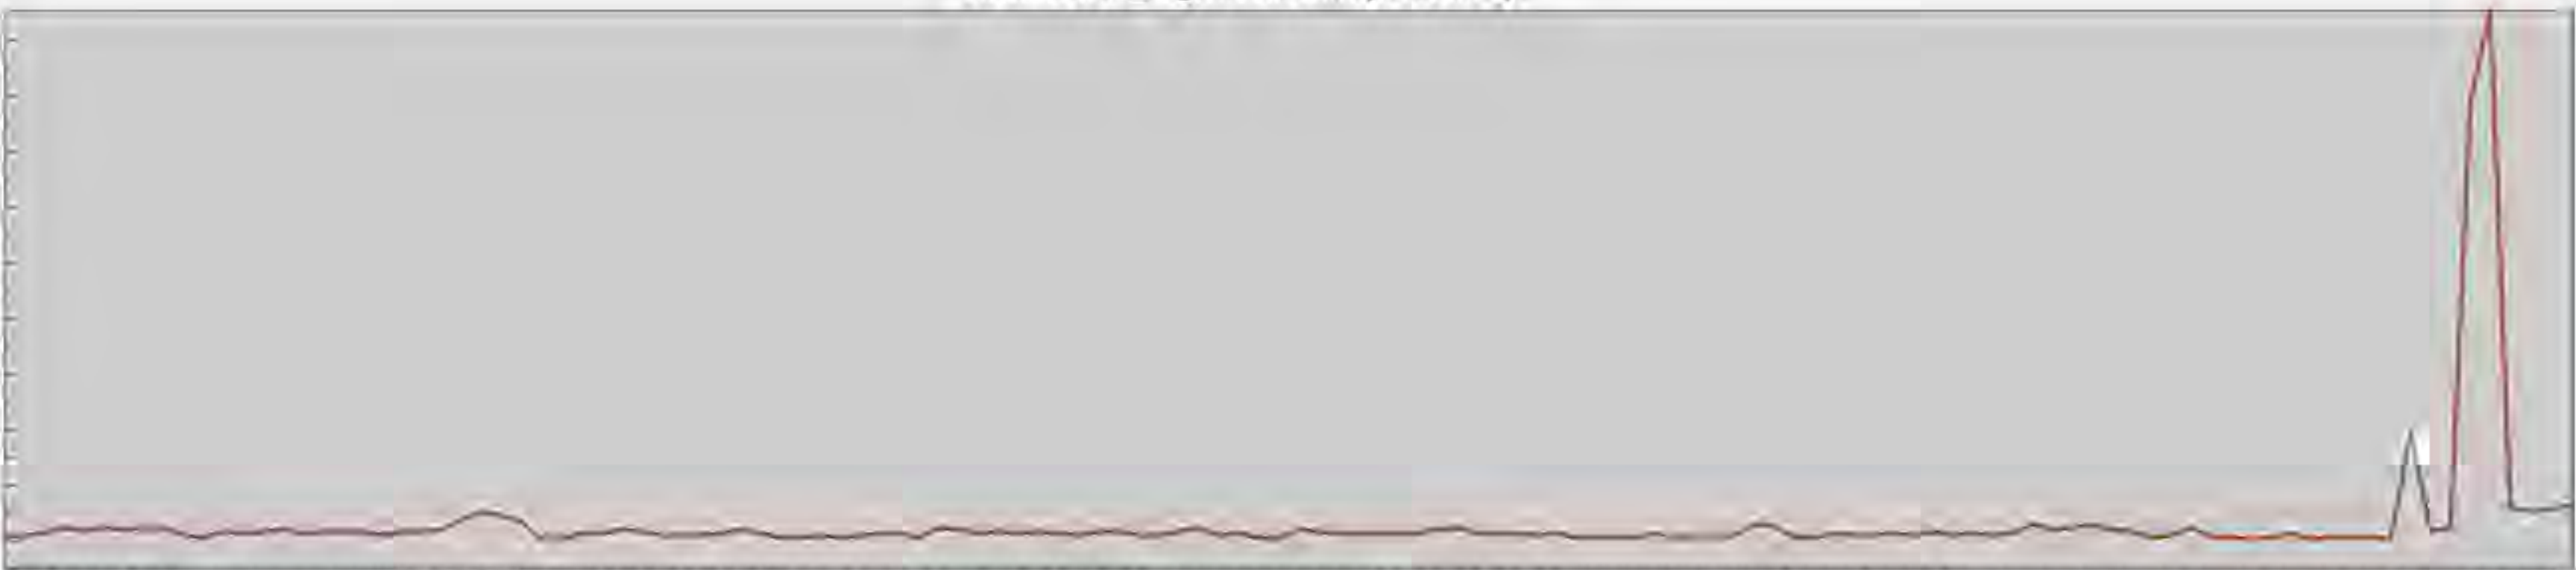

130-NALT GSM289411 CELL  
 129-NALT GSM289410 CELL  
 128-NALT GSM289409 CELL  
 127-NALT GSM289408 CELL  
 126-Color-d9 GSM1988105 CELL  
 125-Color-d9 GSM1988104 CELL  
 124-Color-d9 GSM1988103 CELL  
 123-Color-d4 GSM1988102 CELL  
 122-Color-d4 GSM1988101 CELL  
 121-Intestine-large GSM258676 CELL  
 120-Intestine-large GSM258675 CELL  
 119-Intestine-small GSM258674 CELL  
 118-Intestine-small GSM258673 CELL  
 117-Lymph-nodes GSM258672 CELL  
 116-Lymph-nodes GSM258671 CELL  
 115-Spleen GSM258767 CELL  
 114-Spleen GSM258766 CELL  
 113-Neuro2a GSM258728 CELL  
 112-Neuro2a GSM258727 CELL  
 111-Astrocytes GSM241898 CELL  
 110-mimb GSM258726 CELL  
 109-mimb GSM258725 CELL  
 108-MIMCD3 GSM258724 CELL  
 107-MIMCD3 GSM258723 CELL  
 106-Bruce4 GSM258656 CELL  
 105-Bruce4 GSM258655 CELL  
 104-C2C12 GSM258690 CELL  
 103-C2C12 GSM258689 CELL  
 102-NH3T3 GSM258730 CELL  
 101-NH3T3 GSM258729 CELL  
 100-3T3-L1 GSM258610 CELL  
 99-3T3-L1 GSM258609 CELL  
 98-10T12 GSM258632 CELL  
 97-10T12 GSM258631 CELL  
 96-Osteoblast-d21 GSM258740 CELL  
 95-Osteoblast-d21 GSM258739 CELL  
 94-Osteoblast-d14 GSM258738 CELL  
 93-Osteoblast-d14 GSM258737 CELL  
 92-Osteoblast-d5 GSM258742 CELL  
 91-Osteoblast-d5 GSM258741 CELL  
 90-Chondrocytes GSM266741 CELL  
 89-Chondrocytes GSM266740 CELL  
 88-Nat Helper cell GSM465594 CELL  
 87-Nat Helper cell GSM465593 CELL  
 86-T cell GSM465596 CELL  
 85-MS-1 GSM234692 CELL  
 84-Lymph-endo-cells GSM143704 CELL  
 83-P-FDC GSM481977 CELL  
 82-P-FDC GSM481978 CELL  
 81-P-FDC GSM481976 CELL  
 80-L Y RMLNDCC003001 CELL  
 79-L Y RMLNDCC003001 CELL  
 78-Follicular-Bcells GSM258664 CELL  
 77-Follicular-Bcells GSM258663 CELL  
 76-MZ-Bcell GSM258627 CELL  
 75-MZ-Bcell GSM258627 CELL  
 74-BAF3 GSM258620 CELL  
 73-BAF3 GSM258619 CELL  
 72-Tregs GSM258778 CELL  
 71-Tregs GSM258777 CELL  
 70-T-cells-CD8+ GSM258776 CELL  
 69-T-cells-CD8+ GSM258774 CELL  
 68-T-cells-CD4+ GSM258773 CELL  
 67-T-cells-CD4+ GSM258744 CELL  
 66-Thymocyte-DN GSM465595 CELL  
 65-Osteoclasts GSM258743 CELL  
 64-Osteoclasts GSM258743 CELL  
 63-Microglia GSM258721 CELL  
 62-Microglia GSM258721 CELL  
 61-MM-LPS-7h GSM268706 CELL  
 60-MM-LPS-7h GSM268706 CELL  
 59-MM-LPS-6h GSM258702 CELL  
 58-MM-LPS-6h GSM258702 CELL  
 57-MM-LPS-6h GSM258699 CELL  
 56-MM-LPS-6h GSM258699 CELL  
 55-MM-LPS-6h GSM258694 CELL  
 54-MM-LPS-6h GSM258694 CELL  
 53-Ismacryoid-DC GSM258650 CELL  
 52-Ismacryoid-DC GSM258649 CELL  
 51-CD8a-DC GSM258648 CELL  
 50-CD8a-DC GSM258647 CELL  
 49-CD8a+DC GSM258646 CELL  
 48-CD8a+DC GSM258646 CELL  
 47-NK-cells GSM258732 CELL  
 46-NK-cells GSM258731 CELL  
 45-Mast-cells-IgE+Ad GSM258718 CELL  
 44-Mast-cells-IgE+Ad GSM258717 CELL  
 43-Mast-cells-IgE GSM258714 CELL  
 42-Mast-cells-IgE GSM258713 CELL  
 41-Mast-cells GSM258712 CELL  
 40-Granulocytes GSM258667 CELL  
 39-Granulocytes GSM258667 CELL  
 38-GMP GSM258666 CELL  
 37-GMP GSM258665 CELL  
 36-GMP GSM258664 CELL  
 35-GMP GSM258642 CELL  
 34-MIEP GSM258720 CELL  
 33-MIEP GSM258719 CELL  
 32-MIEP GSM258719 CELL  
 31-HESC GSM258770 CELL  
 30-HESC GSM258769 CELL  
 29-Bone marrow GSM258628 CELL  
 28-Bone marrow GSM258627 CELL  
 27-paneth-cells-GE GSM116358 CELL  
 26-paneth-cells-GE GSM116357 CELL  
 25-paneth-cells GSM116350 CELL  
 24-paneth-cells GSM116359 CELL  
 23-paneth-cells GSM318589 CELL  
 22-paneth-cells GSM318590 CELL  
 21-paneth-cells GSM318590 CELL  
 20-Colon-Crypt GSM480375 cel  
 19-Colon-Vill GSM480363 cel  
 18-Colon-Vill GSM480362 cel  
 17-Colon-IEC-GE GSM349880 CELL  
 16-Colon-IEC-GE GSM350375 CELL  
 15-Ileum-IEC-GE GSM350376 CELL  
 14-Ileum-IEC GSM350371 CELL  
 13-Small-intestine-epithelium RMINEP002001 CELL  
 12-Small-intestine-epithelium RMINEP001001 CELL  
 11-FAE-RMPYEP001001 CELL  
 10-FAE-RMPYEP001001 CELL  
 09-Ileum-IEC GSM190797 CELL  
 08-Ileum-IEC GSM190796 CELL  
 07-Ileum-IEC GSM190795 CELL  
 06-CT-v-M-cells GSM190794 CELL  
 05-CT-v-M-cells GSM190793 CELL  
 04-CT-v-M-cells GSM190792 CELL  
 03-PP-M-cells GSM190791 CELL  
 02-PP-M-cells GSM190790 CELL  
 01-PP-M-cells GSM190789 CELL



Cluster0072\_Phagocyte-related/ antigen processing (28 nodes)

10,288.2  
9,748.7  
9,205.2  
8,663.8  
8,122.3  
7,580.8  
7,039.3  
6,497.8  
5,956.3  
5,414.9  
4,873.4  
4,331.9  
3,790.4  
3,248.9  
2,707.4  
2,165.9  
1,624.5  
1,083  
541.5  
0

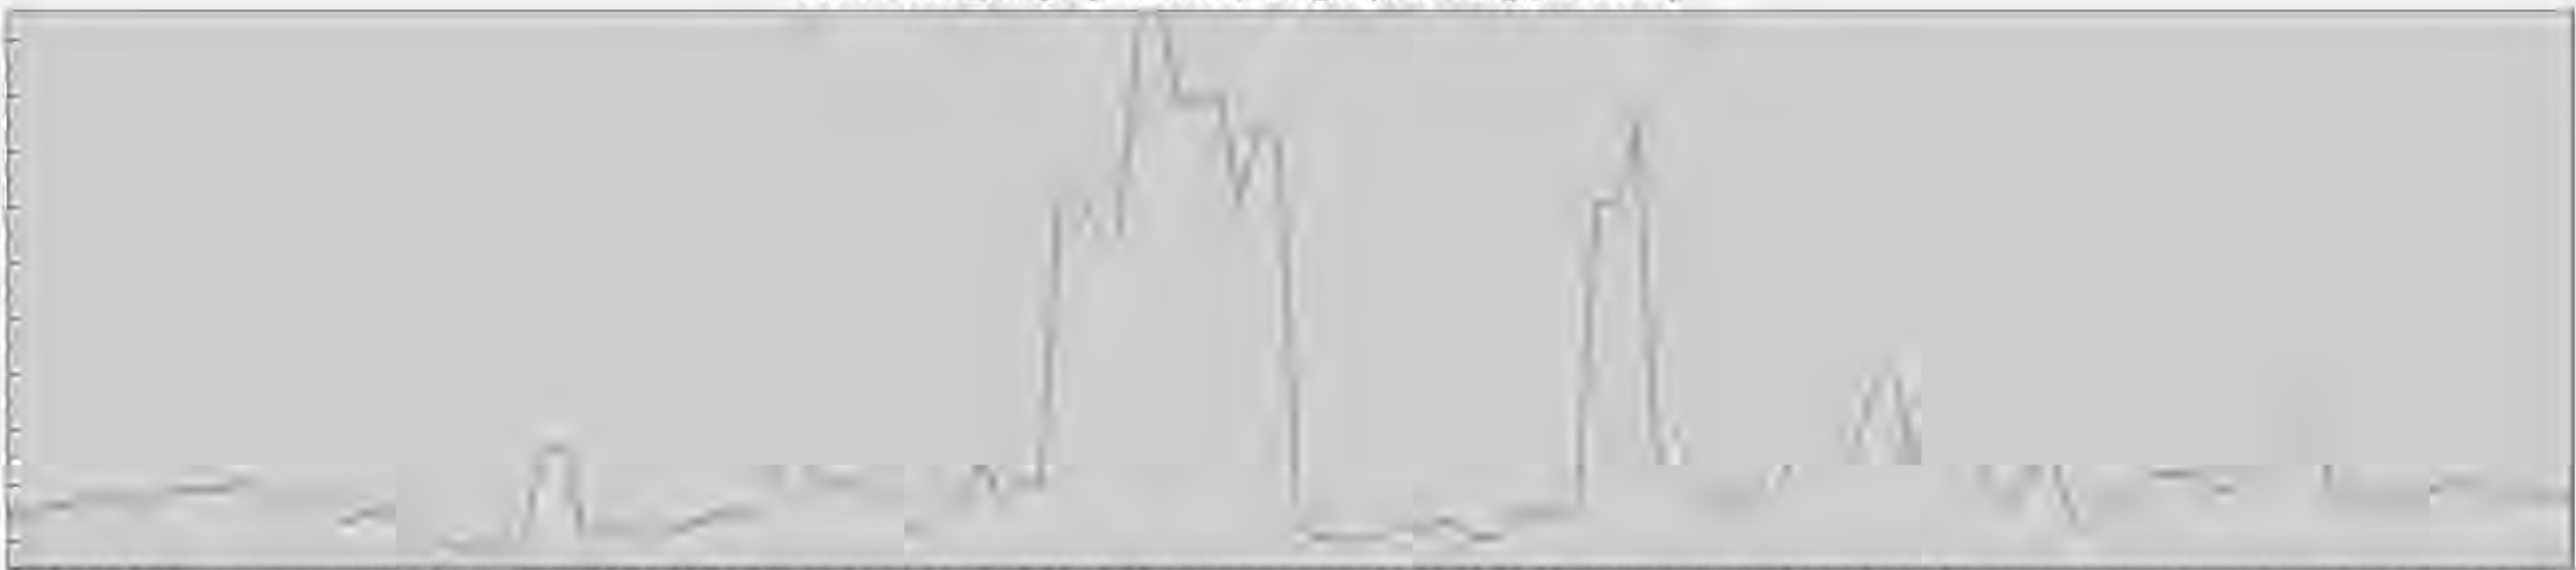

30-NALT GSM289411 CELL  
 29-NALT GSM289410 CELL  
 28-NALT GSM289409 CELL  
 27-NALT GSM289408 CELL  
 26-Color-d9 GSM1988105 CELL  
 25-Color-d9 GSM1988104 CELL  
 24-Color-d9 GSM1988103 CELL  
 23-Color-d4 GSM1988102 CELL  
 22-Color-d4 GSM1988101 CELL  
 21-Intestine-large GSM258676 CELL  
 20-Intestine-large GSM258675 CELL  
 19-Intestine-small GSM258674 CELL  
 18-Intestine-small GSM258673 CELL  
 17-Lymph-nodes GSM258672 CELL  
 16-Lymph-nodes GSM258671 CELL  
 15-Spleen GSM258767 CELL  
 14-Spleen GSM258766 CELL  
 13-Neuro2a GSM258728 CELL  
 12-Neuro2a GSM258727 CELL  
 11-Astrocytes GSM241898 CELL  
 10-mimb GSM258726 CELL  
 9-mimb GSM258725 CELL  
 8-MIMCD3 GSM258724 CELL  
 7-MIMCD3 GSM258723 CELL  
 6-Bruc4 GSM258665 CELL  
 5-Bruc4 GSM258664 CELL  
 4-C2C12 GSM258690 CELL  
 3-C2C12 GSM258689 CELL  
 2-NH3T3 GSM258739 CELL  
 1-NH3T3 GSM258738 CELL  
 99-3T3-L1 GSM258610 CELL  
 98-10T12 GSM258609 CELL  
 97-10T12 GSM258631 CELL  
 96-Osteoblast-d21 GSM258740 CELL  
 95-Osteoblast-d21 GSM258739 CELL  
 94-Osteoblast-d14 GSM258738 CELL  
 93-Osteoblast-d14 GSM258737 CELL  
 92-Osteoblast-d5 GSM258742 CELL  
 91-Osteoblast-d5 GSM258741 CELL  
 90-Chondrocytes GSM266741 CELL  
 89-Chondrocytes GSM266740 CELL  
 88-Nat Helper cell GSM465594 CELL  
 87-Nat Helper cell GSM465593 CELL  
 86-TT cell GSM465596 CELL  
 85-MS-1 GSM234692 CELL  
 84-Lymph-endo-cells GSM143704 CELL  
 83-P-FDC GSM481977 CELL  
 82-P-FDC GSM481976 CELL  
 81-P-FDC GSM481975 CELL  
 80-L-Y RMLNDCC003001 CELL  
 79-L-Y RMLNDCC003001 CELL  
 78-Follicular-B-cells GSM258664 CELL  
 77-Follicular-B-cells GSM258663 CELL  
 76-MZ-Bcell GSM258627 CELL  
 75-MZ-Bcell GSM258626 CELL  
 74-BAF3 GSM258620 CELL  
 73-BAF3 GSM258619 CELL  
 72-Tregs GSM258778 CELL  
 71-Tregs GSM258777 CELL  
 70-T-cells-CD8+ GSM258776 CELL  
 69-T-cells-CD8+ GSM258774 CELL  
 68-T-cells-CD4+ GSM258773 CELL  
 67-T-cells-CD4+ GSM258744 CELL  
 66-Thymocyte-DN GSM465595 CELL  
 65-Osteoclasts GSM258743 CELL  
 64-Microglia GSM258721 CELL  
 63-Microglia GSM258721 CELL  
 62-MM-LPS-7h GSM258706 CELL  
 61-MM-LPS-7h GSM258706 CELL  
 60-MM-LPS-6h GSM258702 CELL  
 59-MM-LPS-6h GSM258701 CELL  
 58-MM-LPS-6h GSM258699 CELL  
 57-MM-LPS-6h GSM258699 CELL  
 56-MM-LPS-6h GSM258694 CELL  
 55-MM-LPS-6h GSM258694 CELL  
 54-Ismacryoid-DC GSM258650 CELL  
 53-Ismacryoid-DC GSM258649 CELL  
 52-CD8a-DC GSM258647 CELL  
 51-CD8a-DC GSM258647 CELL  
 50-CD8a+DC GSM258646 CELL  
 49-CD8a+DC GSM258646 CELL  
 48-NK-cells GSM258731 CELL  
 47-NK-cells GSM258731 CELL  
 46-Mast-cells-IgE+Ad GSM258718 CELL  
 45-Mast-cells-IgE+Ad GSM258717 CELL  
 44-Mast-cells-IgE GSM258714 CELL  
 43-Mast-cells-IgE GSM258713 CELL  
 42-Mast-cells-IgE GSM258712 CELL  
 41-Mast-cells-IgE GSM258712 CELL  
 40-Granulocytes GSM258667 CELL  
 39-Granulocytes GSM258667 CELL  
 38-GMP GSM258666 CELL  
 37-GMP GSM258666 CELL  
 36-GMP GSM258665 CELL  
 35-CMP GSM258642 CELL  
 34-MEP GSM258770 CELL  
 33-MEP GSM258770 CELL  
 32-HESC GSM258770 CELL  
 31-HESC GSM258770 CELL  
 29-Bone marrow GSM258628 CELL  
 28-Bone marrow GSM258627 CELL  
 27-paneth-cells-GF-1 GSM116357 CELL  
 26-paneth-cells-GF-1 GSM116350 CELL  
 25-paneth-cells-GF-1 GSM116350 CELL  
 24-paneth-cells-GF-1 GSM116350 CELL  
 23-paneth-cells-GF-1 GSM116350 CELL  
 22-paneth-cells-GF-1 GSM116350 CELL  
 21-paneth-cells-GF-1 GSM116350 CELL  
 20-Colon-Crypt GSM480374 CELL  
 19-Colon-Vill GSM480363 CELL  
 18-Colon-Vill GSM480362 CELL  
 17-Colon-IEC-GF GSM349880 CELL  
 16-Colon-IEC-GF GSM350375 CELL  
 15-Ileum-IEC-GF GSM350376 CELL  
 14-Ileum-IEC GSM350371 CELL  
 13-Small-intestine-epithelium RMINEP002901 CELL  
 12-Small-intestine-epithelium RMINEP001001 CELL  
 11-FAE-RMPYEP001001 CELL  
 10-FAE-RMPYEP001001 CELL  
 9-Ileum-IEC GSM190797 CELL  
 8-Ileum-IEC GSM190796 CELL  
 7-Ileum-IEC GSM190795 CELL  
 6-CT-w-M-cells GSM190794 CELL  
 5-CT-w-M-cells GSM190793 CELL  
 4-CT-y-M-cells GSM190792 CELL  
 3-PP-M-cells GSM190791 CELL  
 2-PP-M-cells GSM190790 CELL  
 1-PP-M-cells GSM190789 CELL



### Cluster0073\_High in B and T cells (28 nodes)

578.6  
548.2  
517.7  
487.2  
456.8  
426.3  
395.9  
365.4  
335  
304.5  
274.1  
243.6  
213.2  
182.7  
152.3  
121.8  
91.4  
60.9  
30.5  
0

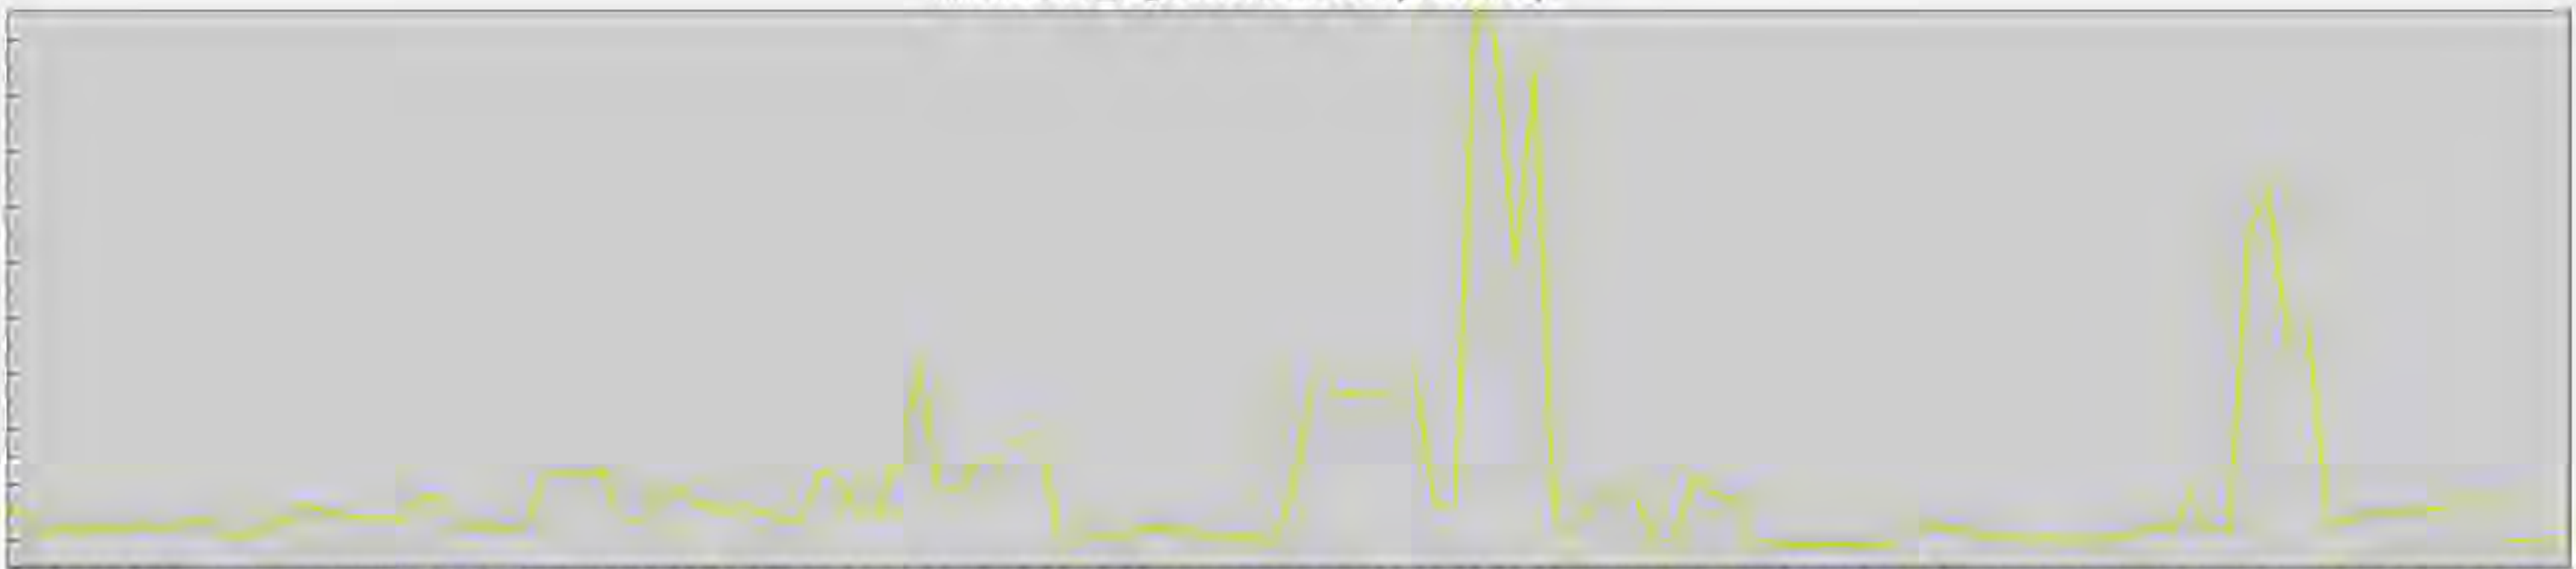

130-NALT GSM289411.CEL  
129-NALT GSM289410.CEL  
128-NALT GSM289409.CEL  
127-NALT GSM289408.CEL  
126-Colon-d9 GSM1988105.CEL  
125-Colon-d9 GSM1988104.CEL  
124-Colon-d9 GSM1988103.CEL  
123-Colon-d4 GSM1988102.CEL  
122-Colon-d4 GSM1988101.CEL  
121-Intestine-large GSM258676.CEL  
120-Intestine-large GSM258675.CEL  
119-Intestine-small GSM258674.CEL  
118-Intestine-small GSM258673.CEL  
117-Lymph-nodes GSM258672.CEL  
116-Spleen GSM258768.CEL  
115-Spleen GSM258767.CEL  
114-Spleen GSM258766.CEL  
113-Neuro2a GSM258729.CEL  
112-Neuro2a GSM258728.CEL  
111-Astrocytes GSM241898.CEL  
110-mimb GSM258726.CEL  
109-mimb GSM258725.CEL  
108-MIMCD3 GSM258724.CEL  
107-MIMCD3 GSM258723.CEL  
106-Bruce4 GSM258665.CEL  
105-Bruce4 GSM258664.CEL  
104-C2C12 GSM258690.CEL  
103-C2C12 GSM258689.CEL  
102-NH3T3 GSM258730.CEL  
101-NH3T3 GSM258729.CEL  
100-3T3-L1 GSM258610.CEL  
99-3T3-L1 GSM258609.CEL  
98-10T12 GSM258632.CEL  
97-10T12 GSM258631.CEL  
96-Osteoblast-d21 GSM258740.CEL  
95-Osteoblast-d21 GSM258739.CEL  
94-Osteoblast-d14 GSM258738.CEL  
93-Osteoblast-d14 GSM258737.CEL  
92-Osteoblast-d5 GSM258742.CEL  
91-Osteoblast-d5 GSM258741.CEL  
90-Chondrocytes GSM266741.CEL  
89-Chondrocytes GSM266740.CEL  
88-Nat Helper cell GSM465594.CEL  
87-Nat Helper cell GSM465593.CEL  
86-TT cell GSM465596.CEL  
85-MS-1 GSM234692.CEL  
84-Lymph-endo-cells GSM143704.CEL  
83-P-FDC GSM481977.CEL  
82-P-FDC GSM481978.CEL  
81-P-FDC GSM481976.CEL  
80-L-Y RMLNDC003001.CEL  
79-L-Y RMLNDC003001.CEL  
78-Follicular-Bcells GSM258664.CEL  
77-Follicular-Bcells GSM258663.CEL  
76-MZ-Bcell GSM258622.CEL  
75-MZ-Bcell GSM258621.CEL  
74-BAF3 GSM258620.CEL  
73-BAF3 GSM258619.CEL  
72-Tregs GSM258778.CEL  
71-Tregs GSM258777.CEL  
70-T-cells-CD8+ GSM258776.CEL  
69-T-cells-CD8+ GSM258774.CEL  
68-T-cells-CD4+ GSM258773.CEL  
67-T-cells-CD4+ GSM258773.CEL  
66-Thymocyte-DN GSM465595.CEL  
65-Osteoclasts GSM258744.CEL  
64-Osteoclasts GSM258743.CEL  
63-Microglia GSM258721.CEL  
62-Microglia GSM258721.CEL  
61-MM-LPS-7h GSM258706.CEL  
60-MM-LPS-7h GSM258706.CEL  
59-MM-LPS-6h GSM258702.CEL  
58-MM-LPS-6h GSM258701.CEL  
57-MM-LPS-6h GSM258699.CEL  
56-MM-LPS-6h GSM258699.CEL  
55-MM-LPS-6h GSM258694.CEL  
54-MM-LPS-6h GSM258694.CEL  
53-Iasmacryoid-DC GSM258650.CEL  
52-Iasmacryoid-DC GSM258649.CEL  
51-CD8a-DC GSM258648.CEL  
50-CD8a-DC GSM258647.CEL  
49-CD8a+DC GSM258646.CEL  
48-CD8a+DC GSM258646.CEL  
47-NK-cells GSM258732.CEL  
46-NK-cells GSM258731.CEL  
45-Mast-cells-IgE+Ad GSM258719.CEL  
44-Mast-cells-IgE+Ad GSM258717.CEL  
43-Mast-cells-IgE GSM258714.CEL  
42-Mast-cells-IgE GSM258713.CEL  
41-Mast-cells GSM258712.CEL  
40-Granulocytes GSM258668.CEL  
39-Granulocytes GSM258667.CEL  
38-GMP GSM258666.CEL  
37-GMP GSM258666.CEL  
36-GMP GSM258665.CEL  
35-CMP GSM258642.CEL  
34-CMP GSM258641.CEL  
33-MEP GSM258720.CEL  
32-MEP GSM258719.CEL  
31-HESC GSM258770.CEL  
30-HESC GSM258769.CEL  
29-Bone marrow GSM258628.CEL  
28-Bone marrow GSM258627.CEL  
27-paneth-cells-GF-1 GSM116357.CEL  
26-paneth-cells-GF-1 GSM116350.CEL  
25-paneth-cells GSM116350.CEL  
24-paneth-cells GSM116359.CEL  
23-paneth-cells GSM318589.CEL  
22-paneth-cells GSM318590.CEL  
21-paneth-cells GSM318590.CEL  
20-Colon-Crypt GSM480374.CEL  
19-Colon-Vill GSM480363.CEL  
18-Colon-Vill GSM480362.CEL  
17-Colon-IEC-GF GSM349880.CEL  
16-Colon-IEC-GF GSM350375.CEL  
15-Ileum-IEC-GF GSM350376.CEL  
14-Ileum-IEC GSM350371.CEL  
13-Small-intestine-epithelium RMINEP002001.CEL  
12-Small-intestine-epithelium RMINEP001001.CEL  
11-FAE-RMPYEP002001.CEL  
10-FAE-RMPYEP001001.CEL  
9-Ileum-IEC GSM190797.CEL  
8-Ileum-IEC GSM190796.CEL  
7-Ileum-IEC GSM190795.CEL  
6-CT-v-M-cells GSM190794.CEL  
5-CT-v-M-cells GSM190793.CEL  
4-CT-v-M-cells GSM190792.CEL  
3-PP-M-cells GSM190791.CEL  
2-PP-M-cells GSM190790.CEL  
1-PP-M-cells GSM190789.CEL



Cluster0074\_Large intestine-related (27 nodes)

3,780.8  
3,581.6  
3,382.7  
3,183.7  
2,984.7  
2,785.7  
2,586.7  
2,387.8  
2,188.8  
1,989.8  
1,790.8  
1,591.8  
1,392.9  
1,193.9  
994.9  
795.9  
596.9  
398  
199  
0

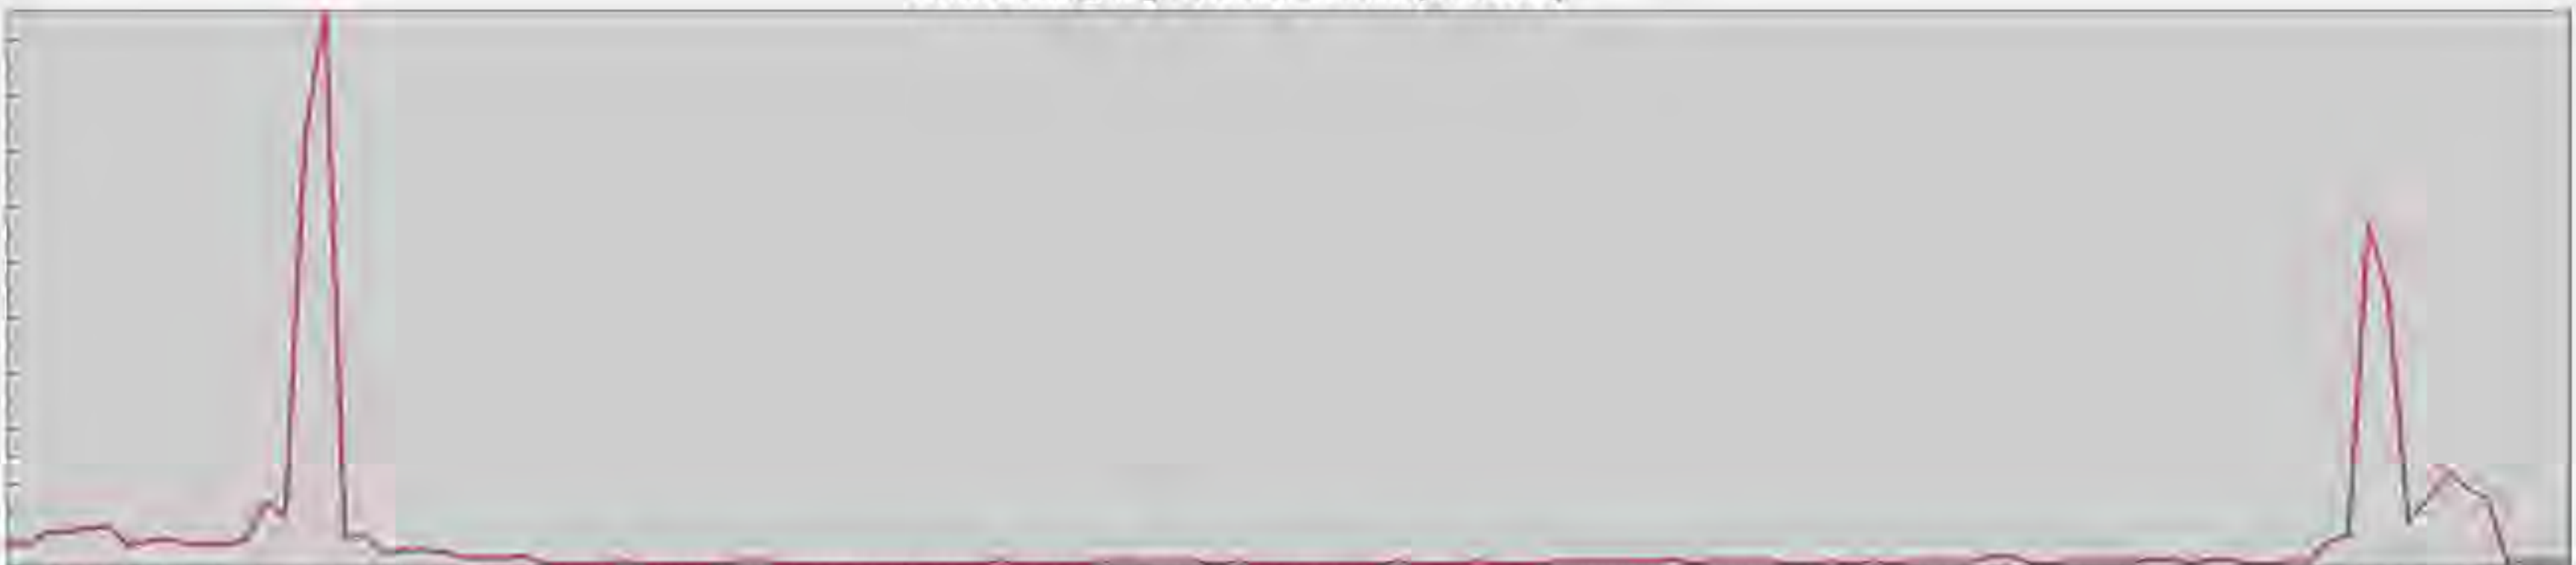

01- PP-M-cells\_GSM190789.CEL  
 02- PP-M-cells\_GSM190790.CEL  
 03- PP-M-cells\_GSM190791.CEL  
 04- CT-y-M-cells\_GSM190792.CEL  
 05- CT-y-M-cells\_GSM190793.CEL  
 06- CT-w-M-cells\_GSM190794.CEL  
 07- Ileum-EC\_GSM190795.CEL  
 08- Ileum-EC\_GSM190796.CEL  
 09- Ileum-EC\_GSM190797.CEL  
 10- FAE-RMPYEP001001.CEL  
 11- FAE-RMPYEP002001.CEL  
 12- Small intestine-epithelium\_RMINEP001001.CEL  
 13- Small intestine-epithelium\_RMINEP002001.CEL  
 14- Ileum-EC\_GSM350371.CEL  
 15- Ileum-EC\_GSM350375.CEL  
 16- Colon-IEC-Gf\_GSM349880.CEL  
 17- Colon-IEC-Gf\_GSM349880.CEL  
 18- Colon-Vill\_GSM480362.CEL  
 19- Colon-Vill\_GSM480363.CEL  
 20- Colon-Crypt\_GSM480374.CEL  
 21- Colon-Crypt\_GSM480375.CEL  
 22- Paneth-cells\_GSM318590.CEL  
 23- Paneth-cells\_GSM318589.CEL  
 24- Paneth-cells\_GSM116359.CEL  
 25- Paneth-cells\_GSM116350.CEL  
 26- Paneth-cells-Gf-1-GSM116357.CEL  
 27- Paneth-cells-Gf-1-GSM116357.CEL  
 28- Bone marrow\_GSM258627.CEL  
 29- Bone marrow\_GSM258627.CEL  
 30- NALT\_GSM289411.CEL  
 31- NALT\_GSM289410.CEL  
 32- NALT\_GSM289409.CEL  
 33- NALT\_GSM289408.CEL  
 34- Colon-d9\_GSM198810.CEL  
 35- Colon-d9\_GSM198810.CEL  
 36- Colon-d9\_GSM198810.CEL  
 37- Colon-d4\_GSM198810.CEL  
 38- Colon-d4\_GSM198810.CEL  
 39- Intestine-large\_GSM258676.CEL  
 40- Intestine-large\_GSM258675.CEL  
 41- Intestine-small\_GSM258677.CEL  
 42- Intestine-small\_GSM258692.CEL  
 43- Intestine-small\_GSM258691.CEL  
 44- Spleen\_GSM258767.CEL  
 45- Spleen\_GSM258767.CEL  
 46- Spleen\_GSM258767.CEL  
 47- Astrocytes\_GSM241898.CEL  
 48- Astrocytes\_GSM241898.CEL  
 49- mimb\_GSM258725.CEL  
 50- mimb\_GSM258725.CEL  
 51- mimb\_GSM258725.CEL  
 52- MIMCD3\_GSM258723.CEL  
 53- MIMCD3\_GSM258723.CEL  
 54- Bruce4\_GSM258690.CEL  
 55- Bruce4\_GSM258690.CEL  
 56- C2C12\_GSM258629.CEL  
 57- NH3T3\_GSM258739.CEL  
 58- NH3T3\_GSM258739.CEL  
 59- 3T3-L1\_GSM258610.CEL  
 60- 3T3-L1\_GSM258610.CEL  
 61- 3T3-L1\_GSM258609.CEL  
 62- OT12\_GSM258632.CEL  
 63- OT12\_GSM258632.CEL  
 64- Osteoblast-d21\_GSM258740.CEL  
 65- Osteoblast-d21\_GSM258739.CEL  
 66- Osteoblast-d14\_GSM258738.CEL  
 67- Osteoblast-d14\_GSM258737.CEL  
 68- Osteoblast-d5\_GSM258742.CEL  
 69- Osteoblast-d5\_GSM258741.CEL  
 70- Chondrocytes\_GSM266741.CEL  
 71- Chondrocytes\_GSM266740.CEL  
 72- Nat Helper cell\_GSM465594.CEL  
 73- Nat Helper cell\_GSM465593.CEL  
 74- T cell\_GSM465596.CEL  
 75- MS-1\_GSM234692.CEL  
 76- Lymph-endo-cells\_GSM143704.CEL  
 77- P-FDC\_GSM481977.CEL  
 78- P-FDC\_GSM481978.CEL  
 79- P-FDC\_GSM481976.CEL  
 80- FLY-RMLNDC002001.CEL  
 81- FLY-RMLNDC003001.CEL  
 82- FLY-RMLNDC002001.CEL  
 83- FLY-RMLNDC003001.CEL  
 84- Follicular-Bcells\_GSM258664.CEL  
 85- Follicular-Bcells\_GSM258663.CEL  
 86- MZ-Bcell\_GSM258622.CEL  
 87- MZ-Bcell\_GSM258621.CEL  
 88- BAF3\_GSM258620.CEL  
 89- BAF3\_GSM258619.CEL  
 90- Tregs\_GSM258778.CEL  
 91- Tregs\_GSM258777.CEL  
 92- T-cells-CD8+GSM258776.CEL  
 93- T-cells-CD8+GSM258775.CEL  
 94- T-cells-CD4+GSM258774.CEL  
 95- T-cells-CD4+GSM258773.CEL  
 96- Thymocyte-DN\_GSM465595.CEL  
 97- Osteoclasts\_GSM258743.CEL  
 98- Microglia\_GSM258721.CEL  
 99- Microglia\_GSM258721.CEL  
 100- P-MM-LPS-7h\_GSM268706.CEL  
 101- P-MM-LPS-7h\_GSM268706.CEL  
 102- P-MM-LPS-7h\_GSM268705.CEL  
 103- P-MM-LPS-6h\_GSM268700.CEL  
 104- P-MM-LPS-6h\_GSM268699.CEL  
 105- P-MM-LPS-6h\_GSM268699.CEL  
 106- P-MM-LPS-6h\_GSM268699.CEL  
 107- P-MM-LPS-6h\_GSM268699.CEL  
 108- P-MM-LPS-6h\_GSM268699.CEL  
 109- P-MM-LPS-6h\_GSM268699.CEL  
 110- P-MM-LPS-6h\_GSM268699.CEL  
 111- P-MM-LPS-6h\_GSM268699.CEL  
 112- P-MM-LPS-6h\_GSM268699.CEL  
 113- P-MM-LPS-6h\_GSM268699.CEL  
 114- P-MM-LPS-6h\_GSM268699.CEL  
 115- P-MM-LPS-6h\_GSM268699.CEL  
 116- P-MM-LPS-6h\_GSM268699.CEL  
 117- P-MM-LPS-6h\_GSM268699.CEL  
 118- P-MM-LPS-6h\_GSM268699.CEL  
 119- P-MM-LPS-6h\_GSM268699.CEL  
 120- P-MM-LPS-6h\_GSM268699.CEL  
 121- P-MM-LPS-6h\_GSM268699.CEL  
 122- P-MM-LPS-6h\_GSM268699.CEL  
 123- P-MM-LPS-6h\_GSM268699.CEL  
 124- P-MM-LPS-6h\_GSM268699.CEL  
 125- P-MM-LPS-6h\_GSM268699.CEL  
 126- P-MM-LPS-6h\_GSM268699.CEL  
 127- P-MM-LPS-6h\_GSM268699.CEL  
 128- P-MM-LPS-6h\_GSM268699.CEL  
 129- P-MM-LPS-6h\_GSM268699.CEL  
 130- P-MM-LPS-6h\_GSM268699.CEL  
 131- P-MM-LPS-6h\_GSM268699.CEL  
 132- P-MM-LPS-6h\_GSM268699.CEL  
 133- P-MM-LPS-6h\_GSM268699.CEL  
 134- P-MM-LPS-6h\_GSM268699.CEL  
 135- P-MM-LPS-6h\_GSM268699.CEL  
 136- P-MM-LPS-6h\_GSM268699.CEL  
 137- P-MM-LPS-6h\_GSM268699.CEL  
 138- P-MM-LPS-6h\_GSM268699.CEL  
 139- P-MM-LPS-6h\_GSM268699.CEL  
 140- P-MM-LPS-6h\_GSM268699.CEL  
 141- P-MM-LPS-6h\_GSM268699.CEL  
 142- P-MM-LPS-6h\_GSM268699.CEL  
 143- P-MM-LPS-6h\_GSM268699.CEL  
 144- P-MM-LPS-6h\_GSM268699.CEL  
 145- P-MM-LPS-6h\_GSM268699.CEL  
 146- P-MM-LPS-6h\_GSM268699.CEL  
 147- P-MM-LPS-6h\_GSM268699.CEL  
 148- P-MM-LPS-6h\_GSM268699.CEL  
 149- P-MM-LPS-6h\_GSM268699.CEL  
 150- P-MM-LPS-6h\_GSM268699.CEL  
 151- P-MM-LPS-6h\_GSM268699.CEL  
 152- P-MM-LPS-6h\_GSM268699.CEL  
 153- P-MM-LPS-6h\_GSM268699.CEL  
 154- P-MM-LPS-6h\_GSM268699.CEL  
 155- P-MM-LPS-6h\_GSM268699.CEL  
 156- P-MM-LPS-6h\_GSM268699.CEL  
 157- P-MM-LPS-6h\_GSM268699.CEL  
 158- P-MM-LPS-6h\_GSM268699.CEL  
 159- P-MM-LPS-6h\_GSM268699.CEL  
 160- P-MM-LPS-6h\_GSM268699.CEL  
 161- P-MM-LPS-6h\_GSM268699.CEL  
 162- P-MM-LPS-6h\_GSM268699.CEL  
 163- P-MM-LPS-6h\_GSM268699.CEL  
 164- P-MM-LPS-6h\_GSM268699.CEL  
 165- P-MM-LPS-6h\_GSM268699.CEL  
 166- P-MM-LPS-6h\_GSM268699.CEL  
 167- P-MM-LPS-6h\_GSM268699.CEL  
 168- P-MM-LPS-6h\_GSM268699.CEL  
 169- P-MM-LPS-6h\_GSM268699.CEL  
 170- P-MM-LPS-6h\_GSM268699.CEL  
 171- P-MM-LPS-6h\_GSM268699.CEL  
 172- P-MM-LPS-6h\_GSM268699.CEL  
 173- P-MM-LPS-6h\_GSM268699.CEL  
 174- P-MM-LPS-6h\_GSM268699.CEL  
 175- P-MM-LPS-6h\_GSM268699.CEL  
 176- P-MM-LPS-6h\_GSM268699.CEL  
 177- P-MM-LPS-6h\_GSM268699.CEL  
 178- P-MM-LPS-6h\_GSM268699.CEL  
 179- P-MM-LPS-6h\_GSM268699.CEL  
 180- P-MM-LPS-6h\_GSM268699.CEL  
 181- P-MM-LPS-6h\_GSM268699.CEL  
 182- P-MM-LPS-6h\_GSM268699.CEL  
 183- P-MM-LPS-6h\_GSM268699.CEL  
 184- P-MM-LPS-6h\_GSM268699.CEL  
 185- P-MM-LPS-6h\_GSM268699.CEL  
 186- P-MM-LPS-6h\_GSM268699.CEL  
 187- P-MM-LPS-6h\_GSM268699.CEL  
 188- P-MM-LPS-6h\_GSM268699.CEL  
 189- P-MM-LPS-6h\_GSM268699.CEL  
 190- P-MM-LPS-6h\_GSM268699.CEL  
 191- P-MM-LPS-6h\_GSM268699.CEL  
 192- P-MM-LPS-6h\_GSM268699.CEL  
 193- P-MM-LPS-6h\_GSM268699.CEL  
 194- P-MM-LPS-6h\_GSM268699.CEL  
 195- P-MM-LPS-6h\_GSM268699.CEL  
 196- P-MM-LPS-6h\_GSM268699.CEL  
 197- P-MM-LPS-6h\_GSM268699.CEL  
 198- P-MM-LPS-6h\_GSM268699.CEL  
 199- P-MM-LPS-6h\_GSM268699.CEL  
 200- P-MM-LPS-6h\_GSM268699.CEL  
 201- P-MM-LPS-6h\_GSM268699.CEL  
 202- P-MM-LPS-6h\_GSM268699.CEL  
 203- P-MM-LPS-6h\_GSM268699.CEL  
 204- P-MM-LPS-6h\_GSM268699.CEL  
 205- P-MM-LPS-6h\_GSM268699.CEL  
 206- P-MM-LPS-6h\_GSM268699.CEL  
 207- P-MM-LPS-6h\_GSM268699.CEL  
 208- P-MM-LPS-6h\_GSM268699.CEL  
 209- P-MM-LPS-6h\_GSM268699.CEL  
 210- P-MM-LPS-6h\_GSM268699.CEL  
 211- P-MM-LPS-6h\_GSM268699.CEL  
 212- P-MM-LPS-6h\_GSM268699.CEL  
 213- P-MM-LPS-6h\_GSM268699.CEL  
 214- P-MM-LPS-6h\_GSM268699.CEL  
 215- P-MM-LPS-6h\_GSM268699.CEL  
 216- P-MM-LPS-6h\_GSM268699.CEL  
 217- P-MM-LPS-6h\_GSM268699.CEL  
 218- P-MM-LPS-6h\_GSM268699.CEL  
 219- P-MM-LPS-6h\_GSM268699.CEL  
 220- P-MM-LPS-6h\_GSM268699.CEL  
 221- P-MM-LPS-6h\_GSM268699.CEL  
 222- P-MM-LPS-6h\_GSM268699.CEL  
 223- P-MM-LPS-6h\_GSM268699.CEL  
 224- P-MM-LPS-6h\_GSM268699.CEL  
 225- P-MM-LPS-6h\_GSM268699.CEL  
 226- P-MM-LPS-6h\_GSM268699.CEL  
 227- P-MM-LPS-6h\_GSM268699.CEL  
 228- P-MM-LPS-6h\_GSM268699.CEL  
 229- P-MM-LPS-6h\_GSM268699.CEL  
 230- P-MM-LPS-6h\_GSM268699.CEL  
 231- P-MM-LPS-6h\_GSM268699.CEL  
 232- P-MM-LPS-6h\_GSM268699.CEL  
 233- P-MM-LPS-6h\_GSM268699.CEL  
 234- P-MM-LPS-6h\_GSM268699.CEL  
 235- P-MM-LPS-6h\_GSM268699.CEL  
 236- P-MM-LPS-6h\_GSM268699.CEL  
 237- P-MM-LPS-6h\_GSM268699.CEL  
 238- P-MM-LPS-6h\_GSM268699.CEL  
 239- P-MM-LPS-6h\_GSM268699.CEL  
 240- P-MM-LPS-6h\_GSM268699.CEL  
 241- P-MM-LPS-6h\_GSM268699.CEL  
 242- P-MM-LPS-6h\_GSM268699.CEL  
 243- P-MM-LPS-6h\_GSM268699.CEL  
 244- P-MM-LPS-6h\_GSM268699.CEL  
 245- P-MM-LPS-6h\_GSM268699.CEL  
 246- P-MM-LPS-6h\_GSM268699.CEL  
 247- P-MM-LPS-6h\_GSM268699.CEL  
 248- P-MM-LPS-6h\_GSM268699.CEL  
 249- P-MM-LPS-6h\_GSM268699.CEL  
 250- P-MM-LPS-6h\_GSM268699.CEL  
 251- P-MM-LPS-6h\_GSM268699.CEL  
 252- P-MM-LPS-6h\_GSM268699.CEL  
 253- P-MM-LPS-6h\_GSM268699.CEL  
 254- P-MM-LPS-6h\_GSM268699.CEL  
 255- P-MM-LPS-6h\_GSM268699.CEL  
 256- P-MM-LPS-6h\_GSM268699.CEL  
 257- P-MM-LPS-6h\_GSM268699.CEL  
 258- P-MM-LPS-6h\_GSM268699.CEL  
 259- P-MM-LPS-6h\_GSM268699.CEL  
 260- P-MM-LPS-6h\_GSM268699.CEL  
 261- P-MM-LPS-6h\_GSM268699.CEL  
 262- P-MM-LPS-6h\_GSM268699.CEL  
 263- P-MM-LPS-6h\_GSM268699.CEL  
 264- P-MM-LPS-6h\_GSM268699.CEL  
 265- P-MM-LPS-6h\_GSM268699.CEL  
 266- P-MM-LPS-6h\_GSM268699.CEL  
 267- P-MM-LPS-6h\_GSM268699.CEL  
 268- P-MM-LPS-6h\_GSM268699.CEL  
 269- P-MM-LPS-6h\_GSM268699.CEL  
 270- P-MM-LPS-6h\_GSM268699.CEL  
 271- P-MM-LPS-6h\_GSM268699.CEL  
 272- P-MM-LPS-6h\_GSM268699.CEL  
 273- P-MM-LPS-6h\_GSM268699.CEL  
 274- P-MM-LPS-6h\_GSM268699.CEL  
 275- P-MM-LPS-6h\_GSM268699.CEL  
 276- P-MM-LPS-6h\_GSM268699.CEL  
 277- P-MM-LPS-6h\_GSM268699.CEL  
 278- P-MM-LPS-6h\_GSM268699.CEL  
 279- P-MM-LPS-6h\_GSM268699.CEL  
 280- P-MM-LPS-6h\_GSM268699.CEL  
 281- P-MM-LPS-6h\_GSM268699.CEL  
 282- P-MM-LPS-6h\_GSM268699.CEL  
 283- P-MM-LPS-6h\_GSM268699.CEL  
 284- P-MM-LPS-6h\_GSM268699.CEL  
 285- P-MM-LPS-6h\_GSM268699.CEL  
 286- P-MM-LPS-6h\_GSM268699.CEL  
 287- P-MM-LPS-6h\_GSM268699.CEL  
 288- P-MM-LPS-6h\_GSM268699.CEL  
 289- P-MM-LPS-6h\_GSM268699.CEL  
 290- P-MM-LPS-6h\_GSM268699.CEL  
 291- P-MM-LPS-6h\_GSM268699.CEL  
 292- P-MM-LPS-6h\_GSM268699.CEL  
 293- P-MM-LPS-6h\_GSM268699.CEL  
 294- P-MM-LPS-6h\_GSM268699.CEL  
 295- P-MM-LPS-6h\_GSM268699.CEL  
 296- P-MM-LPS-6h\_GSM268699.CEL  
 297- P-MM-LPS-6h\_GSM268699.CEL  
 298- P-MM-LPS-6h\_GSM268699.CEL  
 299- P-MM-LPS-6h\_GSM268699.CEL  
 300- P-MM-LPS-6h\_GSM268699.CEL



Cluster0075\_High inhaematopoietic cells (27 nodes)

2,326.9  
2,204.4  
2,082  
1,959.5  
1,837  
1,714.6  
1,592.1  
1,469.6  
1,347.2  
1,224.7  
1,102.2  
979.8  
857.3  
734.8  
612.3  
489.9  
367.4  
244.9  
122.5  
0

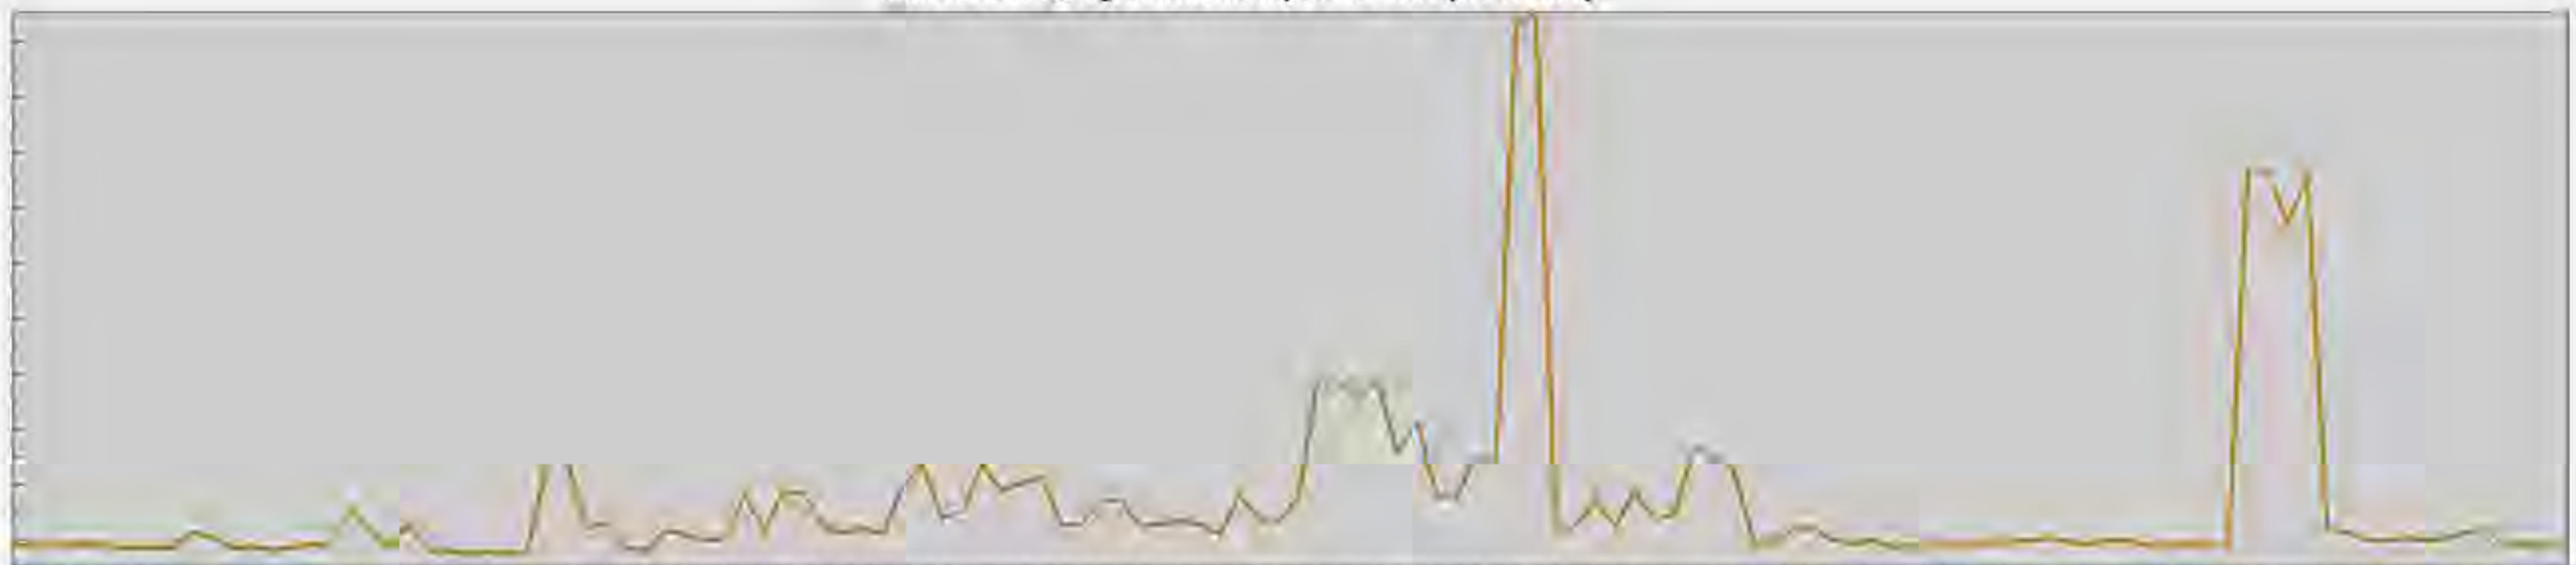

130-NALT GSM289411.CEL  
 129-NALT GSM289410.CEL  
 128-NALT GSM289409.CEL  
 127-NALT GSM289408.CEL  
 126-Colon-d9 GSM1988105.CEL  
 125-Colon-d9 GSM1988104.CEL  
 124-Colon-d9 GSM1988103.CEL  
 123-Colon-d4 GSM1988102.CEL  
 122-Colon-d4 GSM1988101.CEL  
 121-Intestine-large GSM258676.CEL  
 120-Intestine-large GSM258675.CEL  
 119-Intestine-small GSM258674.CEL  
 118-Intestine-small GSM258673.CEL  
 117-Lymph-nodes GSM258672.CEL  
 116-Lymph-nodes GSM258671.CEL  
 115-Spleen GSM258768.CEL  
 114-Spleen GSM258767.CEL  
 113-Neuro2a GSM258728.CEL  
 112-Neuro2a GSM258727.CEL  
 111-Astrocytes GSM241898.CEL  
 110-mim6 GSM258726.CEL  
 109-mim6 GSM258725.CEL  
 108-MIMCD3 GSM258724.CEL  
 107-MIMCD3 GSM258723.CEL  
 106-Bruce4 GSM258666.CEL  
 105-Bruce4 GSM258665.CEL  
 104-C2C12 GSM258690.CEL  
 103-C2C12 GSM258689.CEL  
 102-NH3T3 GSM258739.CEL  
 101-NH3T3 GSM258738.CEL  
 100-3T3-L1 GSM258610.CEL  
 99-3T3-L1 GSM258609.CEL  
 98-10T12 GSM258631.CEL  
 97-10T12 GSM258630.CEL  
 96-Osteoblast-d21 GSM258740.CEL  
 95-Osteoblast-d21 GSM258739.CEL  
 94-Osteoblast-d14 GSM258738.CEL  
 93-Osteoblast-d14 GSM258737.CEL  
 92-Osteoblast-d5 GSM258742.CEL  
 91-Osteoblast-d5 GSM258741.CEL  
 90-Chondrocytes GSM266741.CEL  
 89-Chondrocytes GSM266740.CEL  
 88-Nat Helper cell GSM465594.CEL  
 87-Nat Helper cell GSM465593.CEL  
 86-Tt cell GSM465596.CEL  
 85-MS-1 GSM234692.CEL  
 84-Lymph-endo-cells GSM143704.CEL  
 83-P-FDC GSM481977.CEL  
 82-P-FDC GSM481978.CEL  
 81-P-FDC GSM481976.CEL  
 80-F-L-Y RMLNDC003001.CEL  
 79-F-L-Y RMLNDC003001.CEL  
 78-Follicular-B-cells GSM258664.CEL  
 77-Follicular-B-cells GSM258663.CEL  
 76-MZ-Bcell GSM258627.CEL  
 75-MZ-Bcell GSM258627.CEL  
 74-BAF3 GSM258620.CEL  
 73-BAF3 GSM258619.CEL  
 72-Tregs GSM258778.CEL  
 71-Tregs GSM258777.CEL  
 70-T-cells-CD8+ GSM258776.CEL  
 69-T-cells-CD8+ GSM258774.CEL  
 68-T-cells-CD4+ GSM258773.CEL  
 67-T-cells-CD4+ GSM258744.CEL  
 66-Thymocyte-DN GSM465595.CEL  
 65-Osteoclasts GSM258743.CEL  
 64-Microglia GSM258721.CEL  
 63-Microglia GSM258721.CEL  
 62-MM-LPS-7h GSM268706.CEL  
 61-MM-LPS-7h GSM268705.CEL  
 60-MM-LPS-6h GSM258702.CEL  
 59-MM-LPS-6h GSM258701.CEL  
 58-MM-LPS-6h GSM258699.CEL  
 57-MM-LPS-6h GSM258699.CEL  
 56-MM-LPS-6h GSM258694.CEL  
 55-MM-LPS-6h GSM258694.CEL  
 54-Plasmacytoid-DC GSM258650.CEL  
 53-Plasmacytoid-DC GSM258649.CEL  
 52-CD8a-DC GSM258647.CEL  
 51-CD8a-DC GSM258647.CEL  
 50-CD8a+DC GSM258646.CEL  
 49-CD8a+DC GSM258646.CEL  
 48-NK-cells GSM258732.CEL  
 47-NK-cells GSM258731.CEL  
 46-Mast-cells-IgE+Ad GSM258718.CEL  
 45-Mast-cells-IgE+Ad GSM258717.CEL  
 44-Mast-cells-IgE GSM258714.CEL  
 43-Mast-cells-IgE GSM258713.CEL  
 42-Mast-cells GSM258712.CEL  
 41-Mast-cells GSM258711.CEL  
 40-Granulocytes GSM258668.CEL  
 39-Granulocytes GSM258667.CEL  
 38-GMP GSM258666.CEL  
 37-GMP GSM258666.CEL  
 36-GMP GSM258664.CEL  
 35-GMP GSM258664.CEL  
 34-MEP GSM258720.CEL  
 33-MEP GSM258719.CEL  
 32-MEP GSM258719.CEL  
 31-HSC GSM258770.CEL  
 30-HSC GSM258769.CEL  
 29-Bone marrow GSM258628.CEL  
 28-Bone marrow GSM258627.CEL  
 27-paneth-cells-GF-1 GSM116357.CEL  
 26-paneth-cells-GF-1 GSM116350.CEL  
 25-paneth-cells GSM116359.CEL  
 24-paneth-cells GSM116359.CEL  
 23-paneth-cells GSM318589.CEL  
 22-paneth-cells GSM318590.CEL  
 21-Colon-Crypt GSM480375.CEL  
 20-Colon-Crypt GSM480374.CEL  
 19-Colon-Vill GSM480363.CEL  
 18-Colon-Vill GSM480362.CEL  
 17-Colon-IEC-GF GSM349880.CEL  
 16-Colon-IEC-GF GSM350375.CEL  
 15-Ileum-IEC-GF GSM350376.CEL  
 14-Ileum-IEC GSM350371.CEL  
 13-Small-intestine-epithelium RMINEP002001.CEL  
 12-Small-intestine-epithelium RMINEP001001.CEL  
 11-FAE RMPYEP002001.CEL  
 10-FAE RMPYEP001001.CEL  
 09-Ileum-IEC GSM190797.CEL  
 08-Ileum-IEC GSM190796.CEL  
 07-Ileum-IEC GSM190795.CEL  
 06-CT-v-M-cells GSM190794.CEL  
 05-CT-v-M-cells GSM190793.CEL  
 04-PP-M-cells GSM190792.CEL  
 03-PP-M-cells GSM190791.CEL  
 02-PP-M-cells GSM190790.CEL  
 01-PP-M-cells GSM190789.CEL



Cluster0076\_House keeping-cell cycle (27 nodes)

2,018.4  
1,912.1  
1,805.9  
1,699.7  
1,593.5  
1,487.2  
1,381  
1,274.8  
1,168.5  
1,062.3  
956.1  
849.8  
743.6  
637.4  
531.2  
424.9  
318.7  
212.5  
106.2  
0

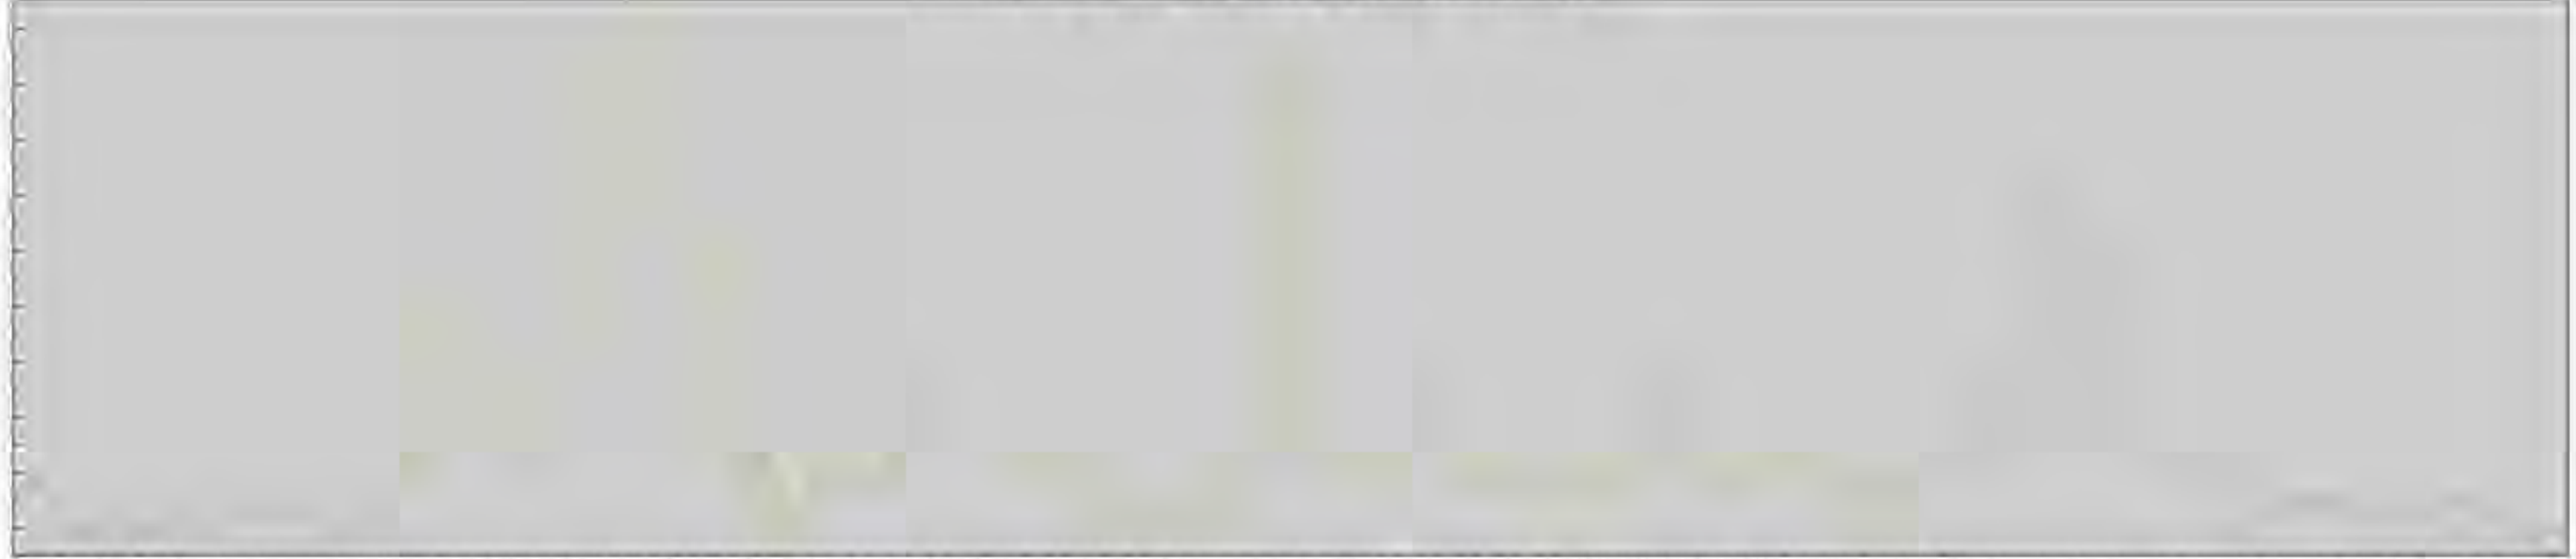

|     |                            |              |     |
|-----|----------------------------|--------------|-----|
| 130 | NALT                       | GSM289411    | CEL |
| 129 | NALT                       | GSM289410    | CEL |
| 128 | NALT                       | GSM289409    | CEL |
| 127 | NALT                       | GSM289408    | CEL |
| 126 | Colon-d9                   | GSM1988105   | CEL |
| 125 | Colon-d9                   | GSM1988104   | CEL |
| 124 | Colon-d9                   | GSM1988103   | CEL |
| 123 | Colon-d4                   | GSM1988102   | CEL |
| 122 | Colon-d4                   | GSM1988101   | CEL |
| 121 | Intestine-large            | GSM258676    | CEL |
| 120 | Intestine-large            | GSM258675    | CEL |
| 119 | Intestine-small            | GSM258678    | CEL |
| 118 | Intestine-small            | GSM258677    | CEL |
| 117 | Lymph-nodes                | GSM258691    | CEL |
| 116 | Lymph-nodes                | GSM258676    | CEL |
| 115 | Spleen                     | GSM258677    | CEL |
| 114 | Spleen                     | GSM258678    | CEL |
| 113 | Neuro2a                    | GSM258727    | CEL |
| 112 | Neuro2a                    | GSM258728    | CEL |
| 111 | Astrocytes                 | GSM2418998   | CEL |
| 110 | mim6                       | GSM258726    | CEL |
| 109 | mim6                       | GSM258725    | CEL |
| 108 | MIMCD3                     | GSM258724    | CEL |
| 107 | MIMCD3                     | GSM258723    | CEL |
| 106 | Bruce4                     | GSM258656    | CEL |
| 105 | Bruce4                     | GSM258655    | CEL |
| 104 | C2C12                      | GSM258690    | CEL |
| 103 | C2C12                      | GSM258689    | CEL |
| 102 | NH3T3                      | GSM258730    | CEL |
| 101 | NH3T3                      | GSM258729    | CEL |
| 100 | 3T3-L1                     | GSM258610    | CEL |
| 99  | 3T3-L1                     | GSM258609    | CEL |
| 98  | 10T12                      | GSM258632    | CEL |
| 97  | 10T12                      | GSM258631    | CEL |
| 96  | Osteoblast-d21             | GSM258740    | CEL |
| 95  | Osteoblast-d21             | GSM258739    | CEL |
| 94  | Osteoblast-d14             | GSM258738    | CEL |
| 93  | Osteoblast-d14             | GSM258737    | CEL |
| 92  | Osteoblast-d5              | GSM258742    | CEL |
| 91  | Osteoblast-d5              | GSM258741    | CEL |
| 90  | Chondrocytes               | GSM266741    | CEL |
| 89  | Chondrocytes               | GSM266740    | CEL |
| 88  | Nat Helper cell            | GSM465594    | CEL |
| 87  | Nat Helper cell            | GSM465593    | CEL |
| 86  | Tt cell                    | GSM465596    | CEL |
| 85  | MS-1                       | GSM234692    | CEL |
| 84  | Lymph-endo-cells           | GSM143704    | CEL |
| 83  | PP-FDC                     | GSM481977    | CEL |
| 82  | PP-FDC                     | GSM481978    | CEL |
| 81  | PP-FDC                     | GSM481976    | CEL |
| 80  | PP-FDC                     | GSM481975    | CEL |
| 79  | F-LY                       | RMLNDC002001 | CEL |
| 78  | Follicular-Bcells          | GSM258664    | CEL |
| 77  | Follicular-Bcells          | GSM258663    | CEL |
| 76  | MZ-Bcell                   | GSM258622    | CEL |
| 75  | MZ-Bcell                   | GSM258621    | CEL |
| 74  | BAF3                       | GSM258620    | CEL |
| 73  | BAF3                       | GSM258619    | CEL |
| 72  | Tregs                      | GSM258778    | CEL |
| 71  | Tregs                      | GSM258777    | CEL |
| 70  | T-cells-CD8+               | GSM258776    | CEL |
| 69  | T-cells-CD8+               | GSM258775    | CEL |
| 68  | T-cells-CD4+               | GSM258774    | CEL |
| 67  | T-cells-CD4+               | GSM258773    | CEL |
| 66  | Thymocyte-DN               | GSM465595    | CEL |
| 65  | Osteoclasts                | GSM258743    | CEL |
| 64  | Osteoclasts                | GSM258744    | CEL |
| 63  | Microglia                  | GSM258721    | CEL |
| 62  | Microglia                  | GSM258721    | CEL |
| 61  | PM-M-PS-7h                 | GSM268706    | CEL |
| 60  | PM-M-PS-7h                 | GSM268705    | CEL |
| 59  | PM-M-PS-6h                 | GSM258702    | CEL |
| 58  | PM-M-PS-6h                 | GSM258701    | CEL |
| 57  | PM-M-PS-6h                 | GSM258699    | CEL |
| 56  | PM-M-PS-6h                 | GSM258698    | CEL |
| 55  | PM-M-PS-6h                 | GSM258697    | CEL |
| 54  | PM-M-PS-6h                 | GSM258696    | CEL |
| 53  | Plasmacytoid-DC            | GSM258650    | CEL |
| 52  | Plasmacytoid-DC            | GSM258649    | CEL |
| 51  | CD8a-DC                    | GSM258648    | CEL |
| 50  | CD8a-DC                    | GSM258647    | CEL |
| 49  | CD8a+DC                    | GSM258646    | CEL |
| 48  | CD8a+DC                    | GSM258645    | CEL |
| 47  | NK-cells                   | GSM258732    | CEL |
| 46  | NK-cells                   | GSM258731    | CEL |
| 45  | Mast-cells-IgE+Ad          | GSM258718    | CEL |
| 44  | Mast-cells-IgE+Ad          | GSM258717    | CEL |
| 43  | Mast-cells-IgE             | GSM258714    | CEL |
| 42  | Mast-cells-IgE             | GSM258713    | CEL |
| 41  | Mast-cells                 | GSM258712    | CEL |
| 40  | Granulocytes               | GSM258668    | CEL |
| 39  | Granulocytes               | GSM258667    | CEL |
| 38  | GMP                        | GSM258666    | CEL |
| 37  | GMP                        | GSM258665    | CEL |
| 36  | GMP                        | GSM258664    | CEL |
| 35  | GMP                        | GSM258664    | CEL |
| 34  | GMP                        | GSM258664    | CEL |
| 33  | MIEP                       | GSM258720    | CEL |
| 32  | MIEP                       | GSM258719    | CEL |
| 31  | HESC                       | GSM258770    | CEL |
| 30  | HESC                       | GSM258770    | CEL |
| 29  | Bone marrow                | GSM258628    | CEL |
| 28  | Bone marrow                | GSM258627    | CEL |
| 27  | paneth-cells-GF            | GSM116358    | CEL |
| 26  | paneth-cells-GF            | GSM116357    | CEL |
| 25  | paneth-cells               | GSM116350    | CEL |
| 24  | paneth-cells               | GSM116359    | CEL |
| 23  | paneth-cells               | GSM318589    | CEL |
| 22  | paneth-cells               | GSM318590    | CEL |
| 21  | Colon-Crypt                | GSM480375    | CEL |
| 20  | Colon-Crypt                | GSM480374    | CEL |
| 19  | Colon-Vill                 | GSM480363    | CEL |
| 18  | Colon-Vill                 | GSM480362    | CEL |
| 17  | Colon-IEC-GF               | GSM349880    | CEL |
| 16  | Colon-IEC-GF               | GSM350375    | CEL |
| 15  | Ileum-IEC                  | GSM350376    | CEL |
| 14  | Ileum-IEC                  | GSM350371    | CEL |
| 13  | Small-intestine-epithelium | RMINEP002001 | CEL |
| 12  | Small-intestine-epithelium | RMINEP001001 | CEL |
| 11  | FAE-RMP                    | EP002001     | CEL |
| 10  | FAE-RMP                    | EP001001     | CEL |
| 09  | Ileum-IEC                  | GSM190797    | CEL |
| 08  | Ileum-IEC                  | GSM190796    | CEL |
| 07  | Ileum-IEC                  | GSM190795    | CEL |
| 06  | CT-v-M-cells               | GSM190794    | CEL |
| 05  | CT-v-M-cells               | GSM190793    | CEL |
| 04  | PP-M-cells                 | GSM190792    | CEL |
| 03  | PP-M-cells                 | GSM190791    | CEL |
| 02  | PP-M-cells                 | GSM190790    | CEL |
| 01  | PP-M-cells                 | GSM190789    | CEL |



Cluster0077\_House keeping-nucleus (27 nodes)

1,172.5  
1,110.8  
1,049.1  
987.4  
925.7  
864  
802.3  
740.5  
678.8  
617.1  
555.4  
493.7  
432  
370.3  
308.6  
246.8  
185.1  
123.4  
61.7  
0

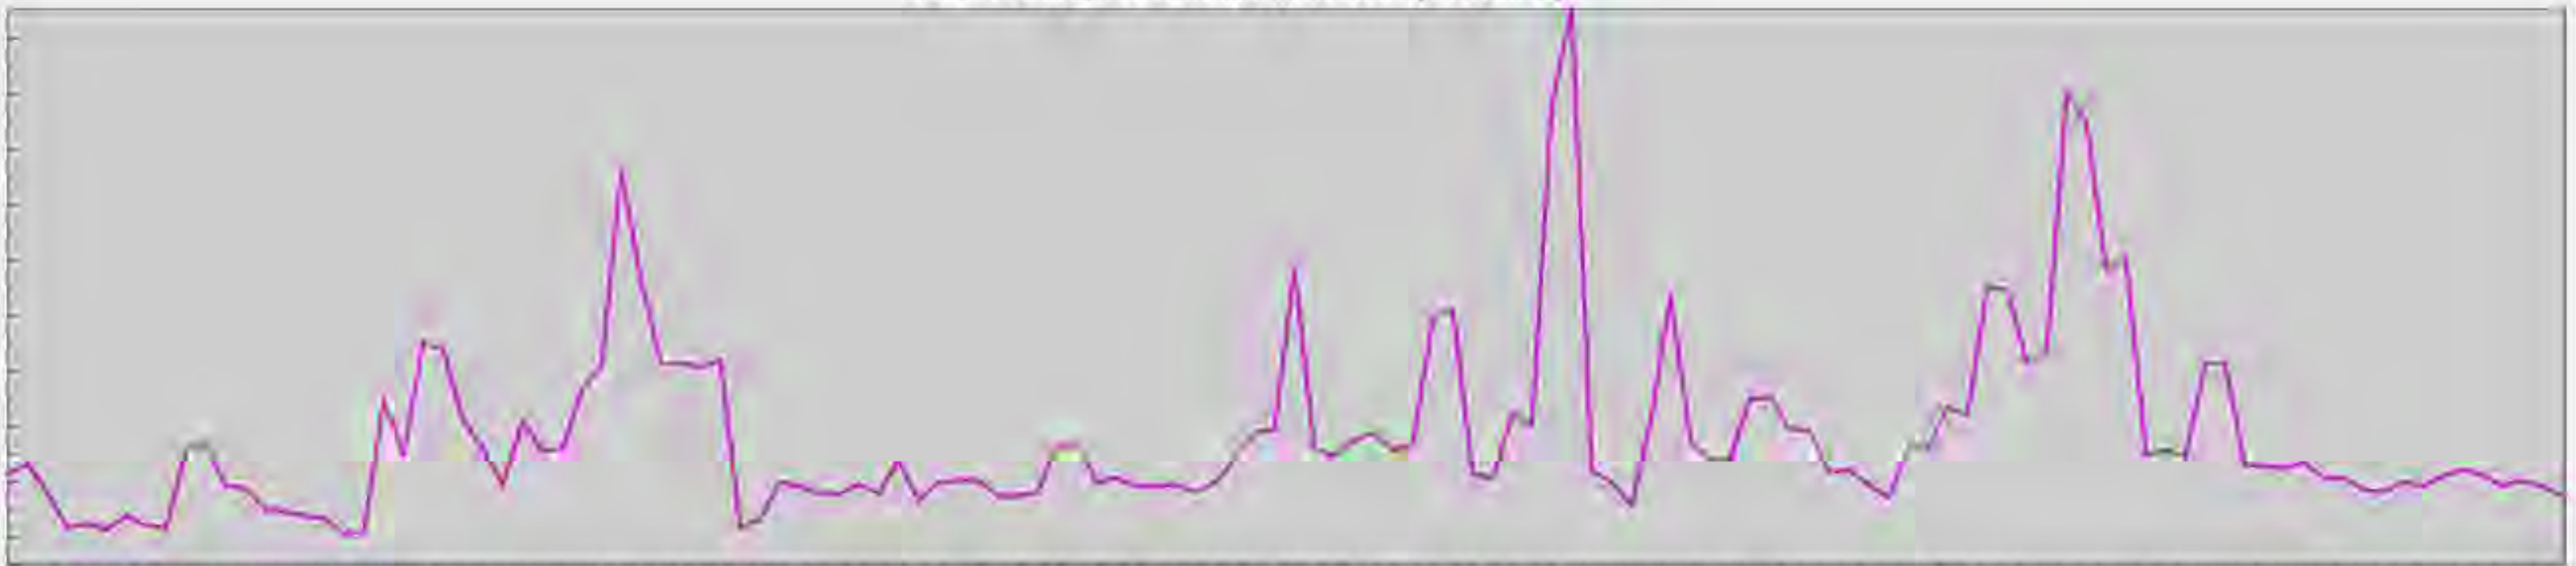

01-PP-M-cells\_GSM190789.CEL  
02-PP-M-cells\_GSM190790.CEL  
03-PP-M-cells\_GSM190791.CEL  
04-CT-v-M-cells\_GSM190792.CEL  
05-CT-v-M-cells\_GSM190793.CEL  
06-CT-v-M-cells\_GSM190794.CEL  
07-Ileum-IEC\_GSM190795.CEL  
08-Ileum-IEC\_GSM190796.CEL  
09-Ileum-IEC\_GSM190797.CEL  
10-FAE-RMPYEP001001.CEL  
11-FAE-RMPYEP002001.CEL  
12-Small-intestine-epithelium\_RMINEP001001.CEL  
13-Small-intestine-epithelium\_RMINEP002001.CEL  
14-Ileum-IEC\_GSM350371.CEL  
15-Ileum-IEC\_GSM350375.CEL  
16-Colon-IEC-Gf\_GSM349880.CEL  
17-Colon-Vill-GSM480362.CEL  
18-Colon-Vill-GSM480363.CEL  
19-Colon-Vill-GSM480364.CEL  
20-Colon-Crypt-GSM480374.CEL  
21-Colon-Crypt-GSM480375.CEL  
22-Paneth-cells-GSM318589.CEL  
23-Paneth-cells-GSM318590.CEL  
24-Paneth-cells-GSM116359.CEL  
25-Paneth-cells-GSM116359.CEL  
26-Paneth-cells-GSM116357.CEL  
27-Paneth-cells-GSM116357.CEL  
28-Bone marrow\_GSM258627.CEL  
29-Bone marrow\_GSM258627.CEL  
30-HSC-GSM258770.CEL  
31-HSC-GSM258770.CEL  
32-MEP-GSM258719.CEL  
33-MEP-GSM258720.CEL  
34-MEP-GSM258641.CEL  
35-MEP-GSM258642.CEL  
36-GMP-GSM258665.CEL  
37-GMP-GSM258666.CEL  
38-GMP-GSM258667.CEL  
39-Granulocytes\_GSM258668.CEL  
40-Mast-cells\_GSM258711.CEL  
41-Mast-cells\_GSM258712.CEL  
42-Mast-cells-GSM258713.CEL  
43-Mast-cells-GSM258714.CEL  
44-Mast-cells-IgE+Ad-GSM258718.CEL  
45-Mast-cells-IgE+Ad-GSM258718.CEL  
46-NK-cells\_GSM258731.CEL  
47-NK-cells\_GSM258732.CEL  
48-CD8a+DC\_GSM258645.CEL  
49-CD8a+DC\_GSM258646.CEL  
50-CD8a-DC\_GSM258647.CEL  
51-CD8a-DC\_GSM258647.CEL  
52-Plasmacytoid-DC\_GSM258649.CEL  
53-Plasmacytoid-DC\_GSM258649.CEL  
54-BMM-GSM258694.CEL  
55-BMM-GSM258694.CEL  
56-BMM-LPS-6h\_GSM258699.CEL  
57-BMM-LPS-6h\_GSM258699.CEL  
58-PMM-GSM258702.CEL  
59-PMM-GSM258702.CEL  
60-PMM-LPS-7h\_GSM258705.CEL  
61-PMM-LPS-7h\_GSM258705.CEL  
62-Microglia\_GSM258721.CEL  
63-Microglia\_GSM258721.CEL  
64-Osteoclasts\_GSM258743.CEL  
65-Osteoclasts\_GSM258744.CEL  
66-Thymocyte-DN\_GSM465595.CEL  
67-T-cells-CD4+\_GSM258773.CEL  
68-T-cells-CD4+\_GSM258774.CEL  
69-T-cells-CD8+\_GSM258775.CEL  
70-T-cells-CD8+\_GSM258776.CEL  
71-Tregs\_GSM258778.CEL  
72-Tregs\_GSM258778.CEL  
73-BAF3\_GSM258619.CEL  
74-BAF3\_GSM258620.CEL  
75-MZ-Bcell\_GSM258622.CEL  
76-MZ-Bcell\_GSM258622.CEL  
77-Follicular-Bcells\_GSM258664.CEL  
78-Follicular-Bcells\_GSM258664.CEL  
79-FLY-RMLNDC002001.CEL  
80-FLY-RMLNDC003001.CEL  
81-PP-FDC\_GSM481976.CEL  
82-PP-FDC\_GSM481978.CEL  
83-PP-FDC\_GSM481978.CEL  
84-Lymph-endo-cells\_GSM143704.CEL  
85-MS-1\_GSM234692.CEL  
86-LTcell\_GSM465596.CEL  
87-Nat Helper cell\_GSM465593.CEL  
88-Nat Helper cell\_GSM465593.CEL  
89-Chondrocytes\_GSM266741.CEL  
90-Chondrocytes\_GSM266741.CEL  
91-Osteoblast-d5\_GSM258741.CEL  
92-Osteoblast-d5\_GSM258742.CEL  
93-Osteoblast-d14\_GSM258737.CEL  
94-Osteoblast-d14\_GSM258738.CEL  
95-Osteoblast-d21\_GSM258739.CEL  
96-Osteoblast-d21\_GSM258739.CEL  
97-10T12\_GSM258631.CEL  
98-10T12\_GSM258631.CEL  
99-3T3-L1\_GSM258609.CEL  
100-3T3-L1\_GSM258610.CEL  
101-NH3T3\_GSM258739.CEL  
102-NH3T3\_GSM258739.CEL  
103-C2C12\_GSM258629.CEL  
104-C2C12\_GSM258630.CEL  
105-Bruce4\_GSM258656.CEL  
106-Bruce4\_GSM258656.CEL  
107-MIMCD3\_GSM258723.CEL  
108-MIMCD3\_GSM258723.CEL  
109-mim6\_GSM258725.CEL  
110-mim6\_GSM258725.CEL  
111-Astrocytes\_GSM241898.CEL  
112-Astrocytes\_GSM241898.CEL  
113-Spleen\_GSM258767.CEL  
114-Spleen\_GSM258767.CEL  
115-Lymph-nodes\_GSM258691.CEL  
116-Lymph-nodes\_GSM258691.CEL  
117-Lymph-nodes\_GSM258691.CEL  
118-Intestine-small\_GSM258677.CEL  
119-Intestine-small\_GSM258677.CEL  
120-Intestine-large\_GSM258678.CEL  
121-Intestine-large\_GSM258678.CEL  
122-Colon-d4\_GSM198101.CEL  
123-Colon-d4\_GSM198101.CEL  
124-Colon-d9\_GSM198103.CEL  
125-Colon-d9\_GSM198103.CEL  
126-Colon-d9\_GSM198104.CEL  
127-NALT\_GSM289408.CEL  
128-NALT\_GSM289409.CEL  
129-NALT\_GSM289410.CEL  
130-NALT\_GSM289411.CEL



Cluster0078\_Lymphoid tissue inducer cell-related (26 nodes)

1,114.5  
1,055.9  
897.2  
938.6  
879.9  
821.2  
762.6  
703.9  
645.3  
586.6  
527.9  
469.3  
410.6  
352  
293.3  
234.6  
176  
117.3  
58.7  
0

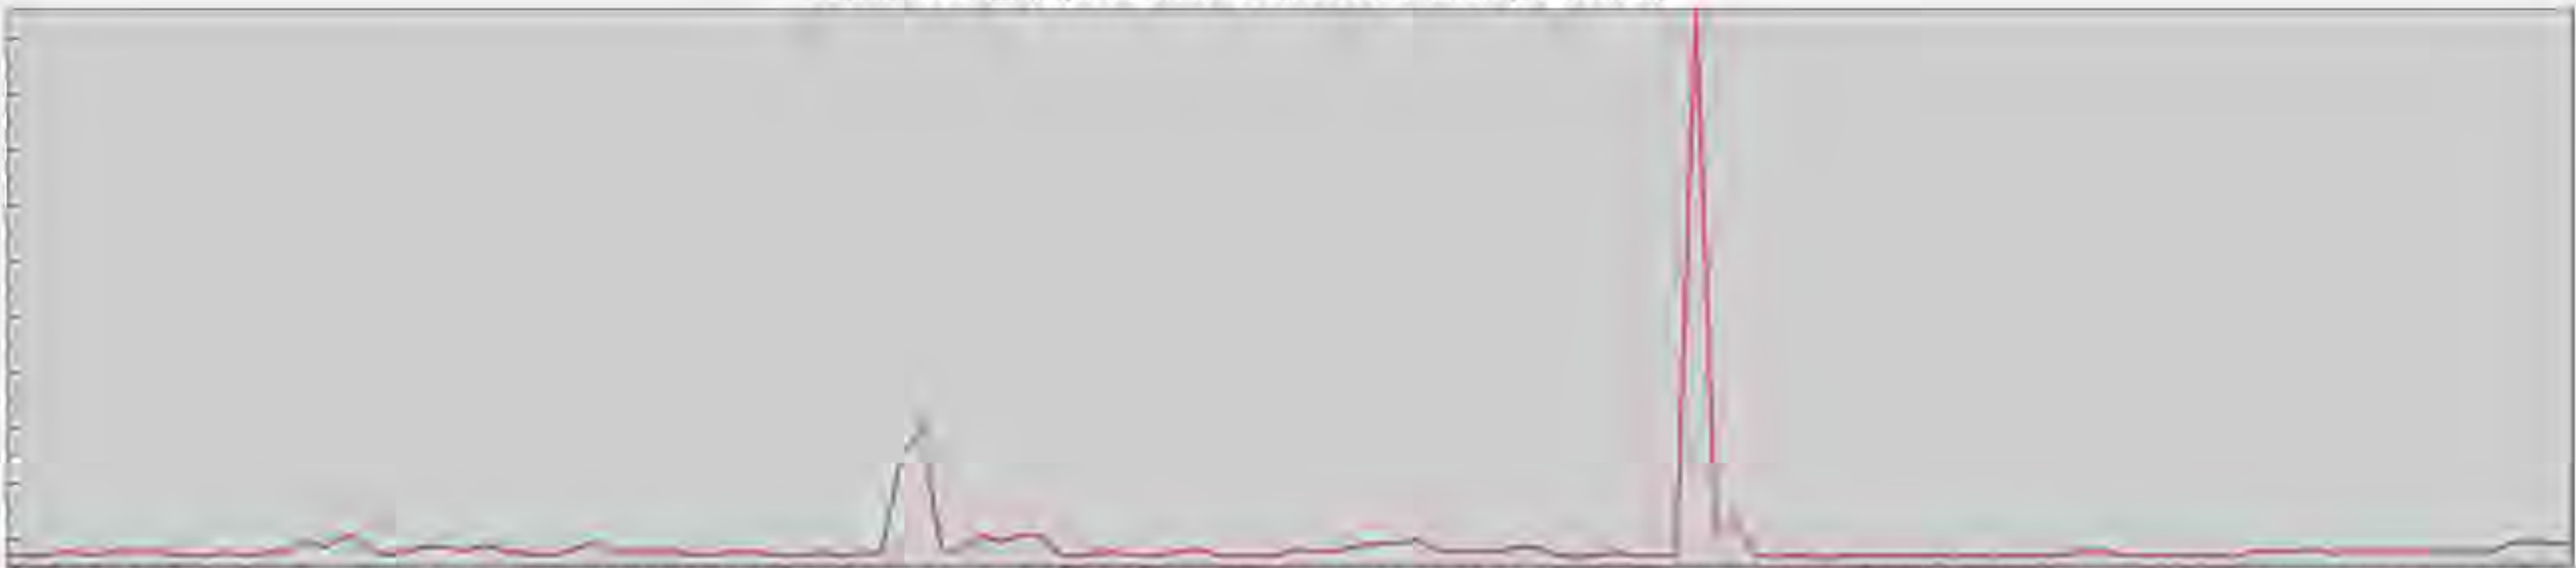

|     |                            |              |     |
|-----|----------------------------|--------------|-----|
| 01  | PP-M-cells                 | GSM190789    | CEL |
| 02  | PP-M-cells                 | GSM190790    | CEL |
| 03  | PP-M-cells                 | GSM190791    | CEL |
| 04  | CT-Y-M-cells               | GSM190792    | CEL |
| 05  | CT-Y-M-cells               | GSM190793    | CEL |
| 06  | CT-W-M-cells               | GSM190794    | CEL |
| 07  | Ileum-IEC                  | GSM190795    | CEL |
| 08  | Ileum-IEC                  | GSM190796    | CEL |
| 09  | Ileum-IEC                  | GSM190797    | CEL |
| 10  | FAE-RMP                    | GSM190798    | CEL |
| 11  | FAE-RMP                    | GSM190799    | CEL |
| 12  | Small intestine-epithelium | RMINEP001001 | CEL |
| 13  | Small intestine-epithelium | RMINEP002001 | CEL |
| 14  | Ileum-IEC                  | GSM350371    | CEL |
| 15  | Ileum-IEC                  | GSM350375    | CEL |
| 16  | Colon-VIII                 | GSM480362    | CEL |
| 17  | Colon-VIII                 | GSM480363    | CEL |
| 18  | Colon-VIII                 | GSM480364    | CEL |
| 19  | Colon-VIII                 | GSM480365    | CEL |
| 20  | Colon-Crypt                | GSM480374    | CEL |
| 21  | Colon-Crypt                | GSM480375    | CEL |
| 22  | Paneth-cells               | GSM318589    | CEL |
| 23  | Paneth-cells               | GSM318590    | CEL |
| 24  | Paneth-cells               | GSM116359    | CEL |
| 25  | Paneth-cells               | GSM116359    | CEL |
| 26  | Paneth-cells               | GSM116357    | CEL |
| 27  | Paneth-cells               | GSM116358    | CEL |
| 28  | Paneth-cells               | GSM116357    | CEL |
| 29  | Bone marrow                | GSM258627    | CEL |
| 30  | NALT                       | GSM289411    | CEL |
| 31  | NALT                       | GSM289410    | CEL |
| 32  | NALT                       | GSM289409    | CEL |
| 33  | NALT                       | GSM289408    | CEL |
| 34  | Colon-d9                   | GSM198810    | CEL |
| 35  | Colon-d9                   | GSM198810    | CEL |
| 36  | Colon-d9                   | GSM198810    | CEL |
| 37  | Colon-d4                   | GSM198810    | CEL |
| 38  | Colon-d4                   | GSM198810    | CEL |
| 39  | Intestine-large            | GSM258676    | CEL |
| 40  | Intestine-large            | GSM258675    | CEL |
| 41  | Intestine-small            | GSM258678    | CEL |
| 42  | Intestine-small            | GSM258677    | CEL |
| 43  | Lymph-nodes                | GSM258691    | CEL |
| 44  | Lymph-nodes                | GSM258692    | CEL |
| 45  | Spleen                     | GSM258728    | CEL |
| 46  | Spleen                     | GSM258729    | CEL |
| 47  | Neuro2a                    | GSM241898    | CEL |
| 48  | Neuro2a                    | GSM241898    | CEL |
| 49  | Astrocytes                 | GSM241898    | CEL |
| 50  | ming                       | GSM258726    | CEL |
| 51  | ming                       | GSM258725    | CEL |
| 52  | ming                       | GSM258724    | CEL |
| 53  | MIMCD3                     | GSM258723    | CEL |
| 54  | MIMCD3                     | GSM258723    | CEL |
| 55  | Bruce4                     | GSM258690    | CEL |
| 56  | Bruce4                     | GSM258689    | CEL |
| 57  | C2C12                      | GSM258688    | CEL |
| 58  | C2C12                      | GSM258687    | CEL |
| 59  | NH3T3                      | GSM258730    | CEL |
| 60  | NH3T3                      | GSM258729    | CEL |
| 61  | 3T3-L1                     | GSM258610    | CEL |
| 62  | 3T3-L1                     | GSM258609    | CEL |
| 63  | 10T1/2                     | GSM258632    | CEL |
| 64  | 10T1/2                     | GSM258631    | CEL |
| 65  | Osteoblast-d21             | GSM258740    | CEL |
| 66  | Osteoblast-d21             | GSM258739    | CEL |
| 67  | Osteoblast-d14             | GSM258738    | CEL |
| 68  | Osteoblast-d14             | GSM258737    | CEL |
| 69  | Osteoblast-d5              | GSM258742    | CEL |
| 70  | Osteoblast-d5              | GSM258741    | CEL |
| 71  | Chondrocytes               | GSM266741    | CEL |
| 72  | Chondrocytes               | GSM266740    | CEL |
| 73  | Nat Helper cell            | GSM465594    | CEL |
| 74  | Nat Helper cell            | GSM465593    | CEL |
| 75  | Ms-1                       | GSM234692    | CEL |
| 76  | Lymph-endo-cells           | GSM143704    | CEL |
| 77  | FDC                        | GSM481977    | CEL |
| 78  | FDC                        | GSM481978    | CEL |
| 79  | FDC                        | GSM481976    | CEL |
| 80  | FDC                        | GSM481976    | CEL |
| 81  | RMLNDC002001               | CEL          |     |
| 82  | RMLNDC002001               | CEL          |     |
| 83  | RMLNDC002001               | CEL          |     |
| 84  | Follicular-B-cells         | GSM258664    | CEL |
| 85  | Follicular-B-cells         | GSM258663    | CEL |
| 86  | MZ-Bcell                   | GSM258622    | CEL |
| 87  | MZ-Bcell                   | GSM258621    | CEL |
| 88  | BAF3                       | GSM258620    | CEL |
| 89  | BAF3                       | GSM258619    | CEL |
| 90  | Tregs                      | GSM258778    | CEL |
| 91  | Tregs                      | GSM258777    | CEL |
| 92  | Tregs                      | GSM258776    | CEL |
| 93  | Tregs                      | GSM258775    | CEL |
| 94  | T-cells-CD8+               | GSM258774    | CEL |
| 95  | T-cells-CD8+               | GSM258773    | CEL |
| 96  | T-cells-CD4+               | GSM258744    | CEL |
| 97  | T-cells-CD4+               | GSM258743    | CEL |
| 98  | Osteoclasts                | GSM258743    | CEL |
| 99  | Osteoclasts                | GSM258743    | CEL |
| 100 | Microglia                  | GSM258721    | CEL |
| 101 | Microglia                  | GSM258721    | CEL |
| 102 | PS-7h                      | GSM258706    | CEL |
| 103 | PS-7h                      | GSM258705    | CEL |
| 104 | PS-6h                      | GSM258702    | CEL |
| 105 | PS-6h                      | GSM258701    | CEL |
| 106 | PS-6h                      | GSM258699    | CEL |
| 107 | PS-6h                      | GSM258694    | CEL |
| 108 | PS-6h                      | GSM258694    | CEL |
| 109 | PS-6h                      | GSM258694    | CEL |
| 110 | PS-6h                      | GSM258694    | CEL |
| 111 | PS-6h                      | GSM258694    | CEL |
| 112 | PS-6h                      | GSM258694    | CEL |
| 113 | PS-6h                      | GSM258694    | CEL |
| 114 | PS-6h                      | GSM258694    | CEL |
| 115 | PS-6h                      | GSM258694    | CEL |
| 116 | PS-6h                      | GSM258694    | CEL |
| 117 | PS-6h                      | GSM258694    | CEL |
| 118 | PS-6h                      | GSM258694    | CEL |
| 119 | PS-6h                      | GSM258694    | CEL |
| 120 | PS-6h                      | GSM258694    | CEL |
| 121 | PS-6h                      | GSM258694    | CEL |
| 122 | PS-6h                      | GSM258694    | CEL |
| 123 | PS-6h                      | GSM258694    | CEL |
| 124 | PS-6h                      | GSM258694    | CEL |
| 125 | PS-6h                      | GSM258694    | CEL |
| 126 | PS-6h                      | GSM258694    | CEL |
| 127 | PS-6h                      | GSM258694    | CEL |
| 128 | PS-6h                      | GSM258694    | CEL |
| 129 | PS-6h                      | GSM258694    | CEL |
| 130 | PS-6h                      | GSM258694    | CEL |
| 131 | PS-6h                      | GSM258694    | CEL |
| 132 | PS-6h                      | GSM258694    | CEL |
| 133 | PS-6h                      | GSM258694    | CEL |
| 134 | PS-6h                      | GSM258694    | CEL |
| 135 | PS-6h                      | GSM258694    | CEL |
| 136 | PS-6h                      | GSM258694    | CEL |
| 137 | PS-6h                      | GSM258694    | CEL |
| 138 | PS-6h                      | GSM258694    | CEL |
| 139 | PS-6h                      | GSM258694    | CEL |
| 140 | PS-6h                      | GSM258694    | CEL |
| 141 | PS-6h                      | GSM258694    | CEL |
| 142 | PS-6h                      | GSM258694    | CEL |
| 143 | PS-6h                      | GSM258694    | CEL |
| 144 | PS-6h                      | GSM258694    | CEL |
| 145 | PS-6h                      | GSM258694    | CEL |
| 146 | PS-6h                      | GSM258694    | CEL |
| 147 | PS-6h                      | GSM258694    | CEL |
| 148 | PS-6h                      | GSM258694    | CEL |
| 149 | PS-6h                      | GSM258694    | CEL |
| 150 | PS-6h                      | GSM258694    | CEL |
| 151 | PS-6h                      | GSM258694    | CEL |
| 152 | PS-6h                      | GSM258694    | CEL |
| 153 | PS-6h                      | GSM258694    | CEL |
| 154 | PS-6h                      | GSM258694    | CEL |
| 155 | PS-6h                      | GSM258694    | CEL |
| 156 | PS-6h                      | GSM258694    | CEL |
| 157 | PS-6h                      | GSM258694    | CEL |
| 158 | PS-6h                      | GSM258694    | CEL |
| 159 | PS-6h                      | GSM258694    | CEL |
| 160 | PS-6h                      | GSM258694    | CEL |
| 161 | PS-6h                      | GSM258694    | CEL |
| 162 | PS-6h                      | GSM258694    | CEL |
| 163 | PS-6h                      | GSM258694    | CEL |
| 164 | PS-6h                      | GSM258694    | CEL |
| 165 | PS-6h                      | GSM258694    | CEL |
| 166 | PS-6h                      | GSM258694    | CEL |
| 167 | PS-6h                      | GSM258694    | CEL |
| 168 | PS-6h                      | GSM258694    | CEL |
| 169 | PS-6h                      | GSM258694    | CEL |
| 170 | PS-6h                      | GSM258694    | CEL |
| 171 | PS-6h                      | GSM258694    | CEL |
| 172 | PS-6h                      | GSM258694    | CEL |
| 173 | PS-6h                      | GSM258694    | CEL |
| 174 | PS-6h                      | GSM258694    | CEL |
| 175 | PS-6h                      | GSM258694    | CEL |
| 176 | PS-6h                      | GSM258694    | CEL |
| 177 | PS-6h                      | GSM258694    | CEL |
| 178 | PS-6h                      | GSM258694    | CEL |
| 179 | PS-6h                      | GSM258694    | CEL |
| 180 | PS-6h                      | GSM258694    | CEL |
| 181 | PS-6h                      | GSM258694    | CEL |
| 182 | PS-6h                      | GSM258694    | CEL |
| 183 | PS-6h                      | GSM258694    | CEL |
| 184 | PS-6h                      | GSM258694    | CEL |
| 185 | PS-6h                      | GSM258694    | CEL |
| 186 | PS-6h                      | GSM258694    | CEL |
| 187 | PS-6h                      | GSM258694    | CEL |
| 188 | PS-6h                      | GSM258694    | CEL |
| 189 | PS-6h                      | GSM258694    | CEL |
| 190 | PS-6h                      | GSM258694    | CEL |
| 191 | PS-6h                      | GSM258694    | CEL |
| 192 | PS-6h                      | GSM258694    | CEL |
| 193 | PS-6h                      | GSM258694    | CEL |
| 194 | PS-6h                      | GSM258694    | CEL |
| 195 | PS-6h                      | GSM258694    | CEL |
| 196 | PS-6h                      | GSM258694    | CEL |
| 197 | PS-6h                      | GSM258694    | CEL |
| 198 | PS-6h                      | GSM258694    | CEL |
| 199 | PS-6h                      | GSM258694    | CEL |
| 200 | PS-6h                      | GSM258694    | CEL |



Cluster0079\_House keeping-mitochondrion (26 nodes)

6,900.6  
6,537.4  
6,174.2  
5,811  
5,447.8  
5,084.6  
4,721.5  
4,358.3  
3,995.1  
3,631.9  
3,268.7  
2,905.5  
2,542.3  
2,179.1  
1,815.9  
1,452.8  
1,089.6  
726.4  
363.2  
0

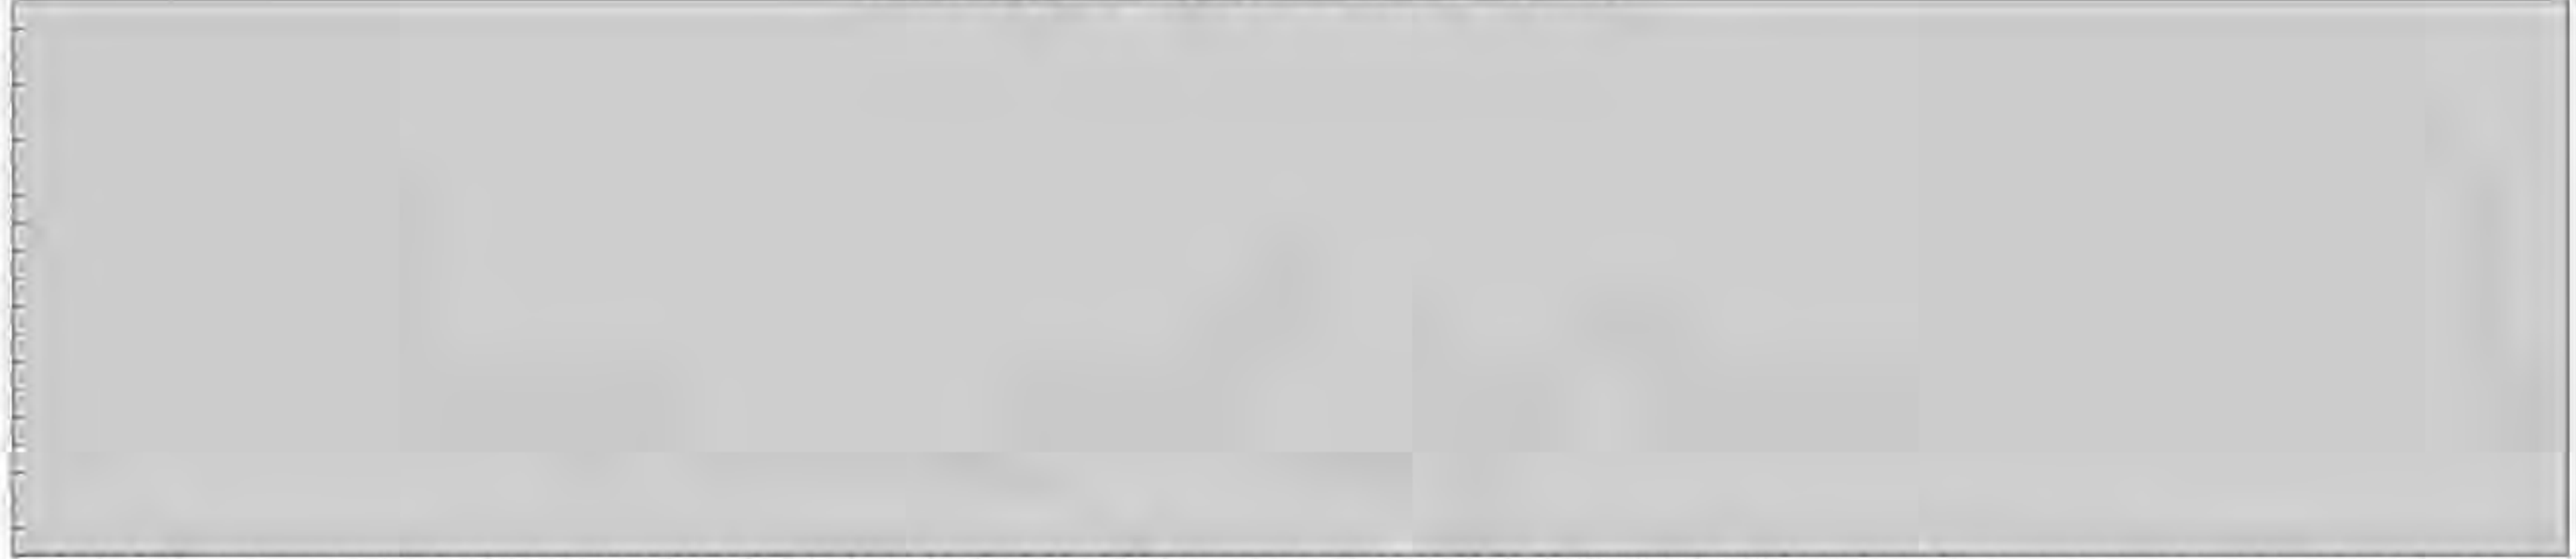

|     |                            |              |     |
|-----|----------------------------|--------------|-----|
| 01  | PP-M-cells                 | GSM190789    | CEL |
| 02  | PP-M-cells                 | GSM190790    | CEL |
| 03  | PP-M-cells                 | GSM190791    | CEL |
| 04  | CT-v-M-cells               | GSM190792    | CEL |
| 05  | CT-v-M-cells               | GSM190793    | CEL |
| 06  | CT-v-M-cells               | GSM190794    | CEL |
| 07  | Ileum-IEC                  | GSM190795    | CEL |
| 08  | Ileum-IEC                  | GSM190796    | CEL |
| 09  | Ileum-IEC                  | GSM190797    | CEL |
| 10  | FAE-RMP                    | GSM190798    | CEL |
| 11  | FAE-RMP                    | GSM190799    | CEL |
| 12  | Small-intestine-epithelium | RMINEP001001 | CEL |
| 13  | Small-intestine-epithelium | RMINEP002001 | CEL |
| 14  | Ileum-IEC                  | GSM350371    | CEL |
| 15  | Ileum-IEC                  | GSM350375    | CEL |
| 16  | Colon-VIII                 | GSM480362    | cel |
| 17  | Colon-VIII                 | GSM480363    | cel |
| 18  | Colon-VIII                 | GSM480364    | cel |
| 19  | Colon-Crypt                | GSM480374    | cel |
| 20  | Colon-Crypt                | GSM480375    | cel |
| 21  | Colon-Crypt                | GSM480376    | cel |
| 22  | Paneth-cells               | GSM318589    | CEL |
| 23  | Paneth-cells               | GSM318590    | CEL |
| 24  | Paneth-cells               | GSM116359    | CEL |
| 25  | Paneth-cells               | GSM116359    | CEL |
| 26  | Paneth-cells               | GSM116357    | CEL |
| 27  | Paneth-cells               | GSM116357    | CEL |
| 28  | Bone marrow                | GSM258627    | CEL |
| 29  | Bone marrow                | GSM258628    | CEL |
| 30  | HSC                        | GSM258770    | CEL |
| 31  | HSC                        | GSM258771    | CEL |
| 32  | MEP                        | GSM258772    | CEL |
| 33  | MEP                        | GSM258773    | CEL |
| 34  | MEP                        | GSM258774    | CEL |
| 35  | MEP                        | GSM258775    | CEL |
| 36  | GMP                        | GSM258665    | CEL |
| 37  | GMP                        | GSM258666    | CEL |
| 38  | GMP                        | GSM258667    | CEL |
| 39  | Granulocytes               | GSM258668    | CEL |
| 40  | Mast-cells                 | GSM258771    | CEL |
| 41  | Mast-cells                 | GSM258772    | CEL |
| 42  | Mast-cells                 | GSM258773    | CEL |
| 43  | Mast-cells                 | GSM258774    | CEL |
| 44  | Mast-cells                 | GSM258775    | CEL |
| 45  | Mast-cells                 | GSM258776    | CEL |
| 46  | NK-cells                   | GSM258777    | CEL |
| 47  | NK-cells                   | GSM258778    | CEL |
| 48  | CD8a+DC                    | GSM258646    | CEL |
| 49  | CD8a+DC                    | GSM258647    | CEL |
| 50  | CD8a+DC                    | GSM258648    | CEL |
| 51  | CD8a+DC                    | GSM258649    | CEL |
| 52  | CD8a+DC                    | GSM258650    | CEL |
| 53  | CD8a+DC                    | GSM258651    | CEL |
| 54  | CD8a+DC                    | GSM258652    | CEL |
| 55  | CD8a+DC                    | GSM258653    | CEL |
| 56  | CD8a+DC                    | GSM258654    | CEL |
| 57  | CD8a+DC                    | GSM258655    | CEL |
| 58  | CD8a+DC                    | GSM258656    | CEL |
| 59  | CD8a+DC                    | GSM258657    | CEL |
| 60  | CD8a+DC                    | GSM258658    | CEL |
| 61  | CD8a+DC                    | GSM258659    | CEL |
| 62  | Microglia                  | GSM258721    | CEL |
| 63  | Microglia                  | GSM258722    | CEL |
| 64  | Microglia                  | GSM258723    | CEL |
| 65  | Osteoclasts                | GSM258743    | CEL |
| 66  | Osteoclasts                | GSM258744    | CEL |
| 67  | Thymocyte-DN               | GSM465595    | CEL |
| 68  | Thymocyte-DN               | GSM465596    | CEL |
| 69  | T-cells-CD4+               | GSM258773    | CEL |
| 70  | T-cells-CD4+               | GSM258774    | CEL |
| 71  | T-cells-CD8+               | GSM258775    | CEL |
| 72  | T-cells-CD8+               | GSM258776    | CEL |
| 73  | Tregs                      | GSM258777    | CEL |
| 74  | Tregs                      | GSM258778    | CEL |
| 75  | BAF3                       | GSM258620    | CEL |
| 76  | MZ-Bcell                   | GSM258621    | CEL |
| 77  | Follicular-Bcells          | GSM258664    | CEL |
| 78  | Follicular-Bcells          | GSM258665    | CEL |
| 79  | Follicular-Bcells          | GSM258666    | CEL |
| 80  | Follicular-Bcells          | GSM258667    | CEL |
| 81  | PP-FDC                     | GSM481976    | CEL |
| 82  | PP-FDC                     | GSM481977    | CEL |
| 83  | PP-FDC                     | GSM481978    | CEL |
| 84  | Lymph-endo-cells           | GSM143704    | CEL |
| 85  | MS-1                       | GSM234692    | CEL |
| 86  | IT cell                    | GSM465596    | CEL |
| 87  | Nat Helper cell            | GSM465593    | CEL |
| 88  | Nat Helper cell            | GSM465594    | CEL |
| 89  | Chondrocytes               | GSM266741    | CEL |
| 90  | Chondrocytes               | GSM266742    | CEL |
| 91  | Osteoblast-d5              | GSM258741    | CEL |
| 92  | Osteoblast-d5              | GSM258742    | CEL |
| 93  | Osteoblast-d14             | GSM258737    | CEL |
| 94  | Osteoblast-d14             | GSM258738    | CEL |
| 95  | Osteoblast-d21             | GSM258740    | CEL |
| 96  | Osteoblast-d21             | GSM258739    | CEL |
| 97  | OT12                       | GSM258631    | CEL |
| 98  | OT12                       | GSM258632    | CEL |
| 99  | 3T3-L1                     | GSM258609    | CEL |
| 100 | 3T3-L1                     | GSM258610    | CEL |
| 101 | NH3T3                      | GSM258739    | CEL |
| 102 | NH3T3                      | GSM258739    | CEL |
| 103 | C2C12                      | GSM258629    | CEL |
| 104 | C2C12                      | GSM258630    | CEL |
| 105 | Bruce4                     | GSM258666    | CEL |
| 106 | Bruce4                     | GSM258666    | CEL |
| 107 | MIMCD3                     | GSM258723    | CEL |
| 108 | MIMCD3                     | GSM258724    | CEL |
| 109 | mim6                       | GSM258725    | CEL |
| 110 | mim6                       | GSM258726    | CEL |
| 111 | Astrocytes                 | GSM241898    | CEL |
| 112 | Spleen                     | GSM258767    | CEL |
| 113 | Spleen                     | GSM258768    | CEL |
| 114 | Lymph-nodes                | GSM258679    | CEL |
| 115 | Lymph-nodes                | GSM258680    | CEL |
| 116 | Lymph-nodes                | GSM258681    | CEL |
| 117 | Lymph-nodes                | GSM258682    | CEL |
| 118 | Intestine-small            | GSM258692    | CEL |
| 119 | Intestine-small            | GSM258693    | CEL |
| 120 | Intestine-large            | GSM258675    | CEL |
| 121 | Intestine-large            | GSM258676    | CEL |
| 122 | Intestine-large            | GSM258677    | CEL |
| 123 | Intestine-large            | GSM258678    | CEL |
| 124 | Colon-d4                   | GSM198810    | CEL |
| 125 | Colon-d4                   | GSM198811    | CEL |
| 126 | Colon-d9                   | GSM198812    | CEL |
| 127 | Colon-d9                   | GSM198813    | CEL |
| 128 | NALT                       | GSM289408    | CEL |
| 129 | NALT                       | GSM289409    | CEL |
| 130 | NALT                       | GSM289410    | CEL |
| 131 | NALT                       | GSM289411    | CEL |



Cluster0080\_Paneth cell-related (26 nodes)

907.3  
859.6  
811.8  
764  
716.3  
668.5  
620.8  
573  
525.3  
477.5  
429.8  
382  
334.3  
286.5  
238.8  
191  
143.3  
95.5  
47.8  
0

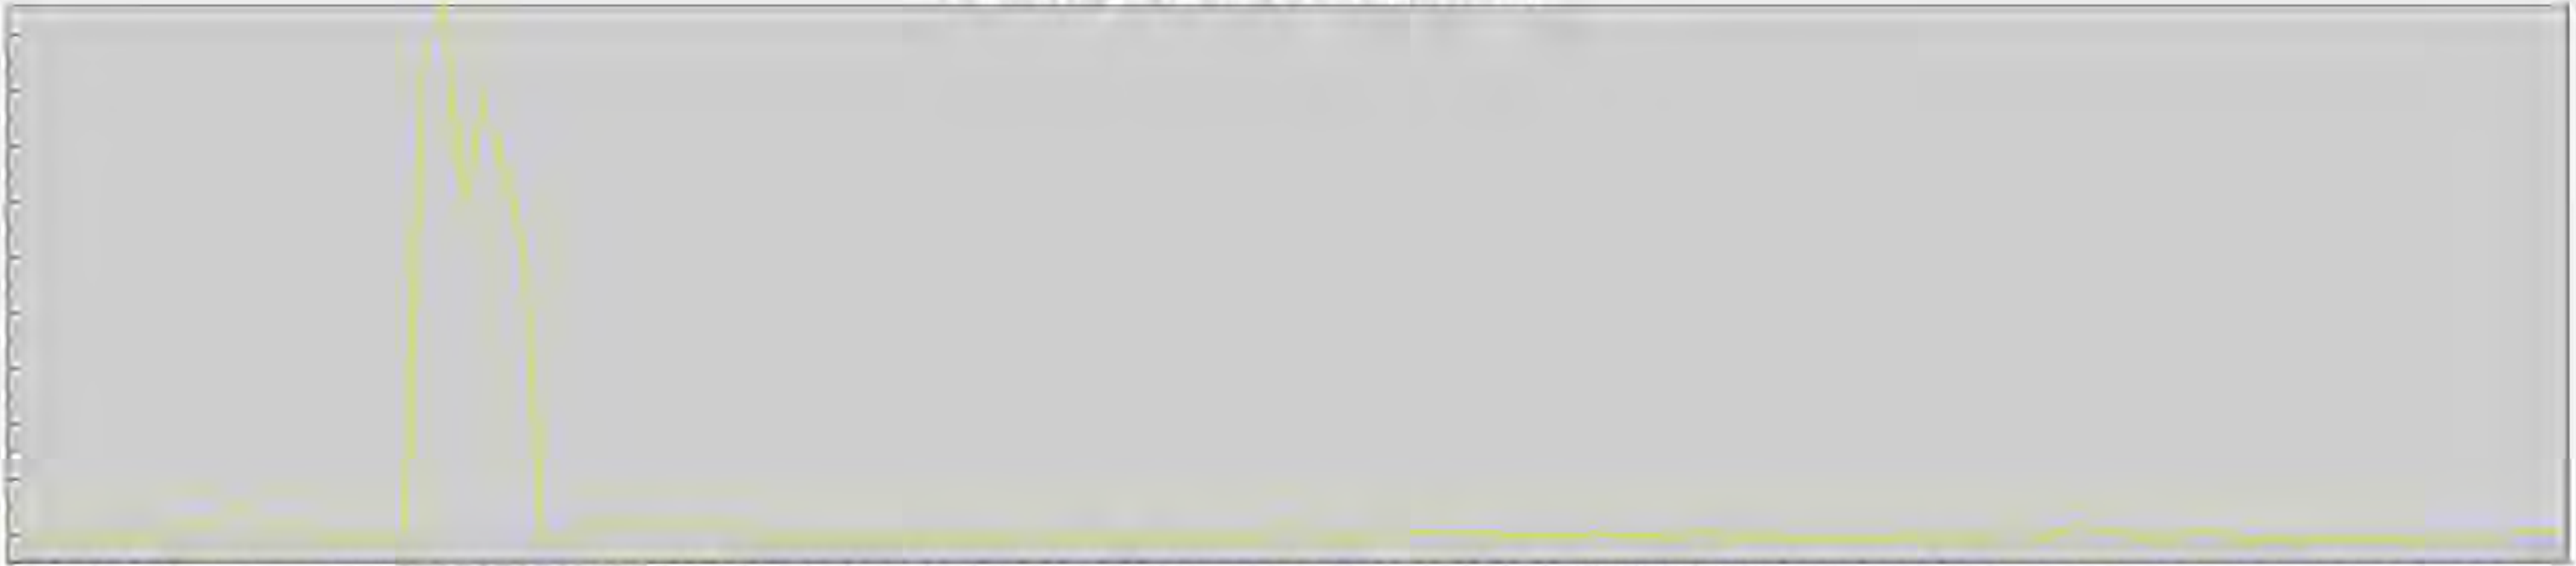

30-NALT GSM289411 CELL  
 29-NALT GSM289410 CELL  
 28-NALT GSM289409 CELL  
 27-NALT GSM289408 CELL  
 26-Color-d9 GSM1988105 CELL  
 25-Color-d9 GSM1988104 CELL  
 24-Color-d9 GSM1988103 CELL  
 23-Color-d4 GSM1988102 CELL  
 22-Color-d4 GSM1988101 CELL  
 21-Intestine-large GSM258676 CELL  
 20-Intestine-large GSM258675 CELL  
 19-Intestine-small GSM258674 CELL  
 18-Intestine-small GSM258673 CELL  
 17-Lymph-nodes GSM258672 CELL  
 16-Spleen GSM258671 CELL  
 15-Spleen GSM258670 CELL  
 14-Neuro2a GSM258669 CELL  
 13-Astrocytes GSM241898 CELL  
 12-mimb GSM258667 CELL  
 11-mimb GSM258666 CELL  
 10-MIMCD3 GSM258665 CELL  
 09-MIMCD3 GSM258664 CELL  
 08-MIMCD3 GSM258663 CELL  
 07-Bruce4 GSM258662 CELL  
 06-Bruce4 GSM258661 CELL  
 05-C2C12 GSM258660 CELL  
 04-NH3T3 GSM258659 CELL  
 03-NH3T3 GSM258658 CELL  
 02-3T3-L1 GSM258657 CELL  
 01-3T3-L1 GSM258656 CELL  
 99-10T1/2 GSM258655 CELL  
 98-10T1/2 GSM258654 CELL  
 97-Osteoblast-d21 GSM258653 CELL  
 96-Osteoblast-d21 GSM258652 CELL  
 95-Osteoblast-d14 GSM258651 CELL  
 94-Osteoblast-d14 GSM258650 CELL  
 93-Osteoblast-d5 GSM258649 CELL  
 92-Osteoblast-d5 GSM258648 CELL  
 91-Chondrocytes GSM258647 CELL  
 90-Chondrocytes GSM258646 CELL  
 89-Nat Helper cell GSM465594 CELL  
 88-Nat Helper cell GSM465593 CELL  
 87-LT cell GSM465592 CELL  
 86-MS-1 GSM234692 CELL  
 85-Lymph-endo-cells GSM143704 CELL  
 84-Lymph-endo-cells GSM481977 CELL  
 83-Lymph-endo-cells GSM481978 CELL  
 82-Lymph-endo-cells GSM481979 CELL  
 81-Lymph-endo-cells GSM481980 CELL  
 80-Lymph-endo-cells GSM481981 CELL  
 79-Lymph-endo-cells GSM481982 CELL  
 78-Lymph-endo-cells GSM481983 CELL  
 77-Lymph-endo-cells GSM481984 CELL  
 76-Lymph-endo-cells GSM481985 CELL  
 75-Lymph-endo-cells GSM481986 CELL  
 74-Lymph-endo-cells GSM481987 CELL  
 73-Lymph-endo-cells GSM481988 CELL  
 72-Lymph-endo-cells GSM481989 CELL  
 71-Lymph-endo-cells GSM481990 CELL  
 70-Lymph-endo-cells GSM481991 CELL  
 69-Lymph-endo-cells GSM481992 CELL  
 68-Lymph-endo-cells GSM481993 CELL  
 67-Lymph-endo-cells GSM481994 CELL  
 66-Lymph-endo-cells GSM481995 CELL  
 65-Lymph-endo-cells GSM481996 CELL  
 64-Lymph-endo-cells GSM481997 CELL  
 63-Lymph-endo-cells GSM481998 CELL  
 62-Lymph-endo-cells GSM481999 CELL  
 61-Lymph-endo-cells GSM482000 CELL  
 60-Lymph-endo-cells GSM482001 CELL  
 59-Lymph-endo-cells GSM482002 CELL  
 58-Lymph-endo-cells GSM482003 CELL  
 57-Lymph-endo-cells GSM482004 CELL  
 56-Lymph-endo-cells GSM482005 CELL  
 55-Lymph-endo-cells GSM482006 CELL  
 54-Lymph-endo-cells GSM482007 CELL  
 53-Lymph-endo-cells GSM482008 CELL  
 52-Lymph-endo-cells GSM482009 CELL  
 51-Lymph-endo-cells GSM482010 CELL  
 50-Lymph-endo-cells GSM482011 CELL  
 49-Lymph-endo-cells GSM482012 CELL  
 48-Lymph-endo-cells GSM482013 CELL  
 47-Lymph-endo-cells GSM482014 CELL  
 46-Lymph-endo-cells GSM482015 CELL  
 45-Lymph-endo-cells GSM482016 CELL  
 44-Lymph-endo-cells GSM482017 CELL  
 43-Lymph-endo-cells GSM482018 CELL  
 42-Lymph-endo-cells GSM482019 CELL  
 41-Lymph-endo-cells GSM482020 CELL  
 40-Lymph-endo-cells GSM482021 CELL  
 39-Lymph-endo-cells GSM482022 CELL  
 38-Lymph-endo-cells GSM482023 CELL  
 37-Lymph-endo-cells GSM482024 CELL  
 36-Lymph-endo-cells GSM482025 CELL  
 35-Lymph-endo-cells GSM482026 CELL  
 34-Lymph-endo-cells GSM482027 CELL  
 33-Lymph-endo-cells GSM482028 CELL  
 32-Lymph-endo-cells GSM482029 CELL  
 31-Lymph-endo-cells GSM482030 CELL  
 30-Lymph-endo-cells GSM482031 CELL  
 29-Lymph-endo-cells GSM482032 CELL  
 28-Lymph-endo-cells GSM482033 CELL  
 27-Lymph-endo-cells GSM482034 CELL  
 26-Lymph-endo-cells GSM482035 CELL  
 25-Lymph-endo-cells GSM482036 CELL  
 24-Lymph-endo-cells GSM482037 CELL  
 23-Lymph-endo-cells GSM482038 CELL  
 22-Lymph-endo-cells GSM482039 CELL  
 21-Lymph-endo-cells GSM482040 CELL  
 20-Lymph-endo-cells GSM482041 CELL  
 19-Lymph-endo-cells GSM482042 CELL  
 18-Lymph-endo-cells GSM482043 CELL  
 17-Lymph-endo-cells GSM482044 CELL  
 16-Lymph-endo-cells GSM482045 CELL  
 15-Lymph-endo-cells GSM482046 CELL  
 14-Lymph-endo-cells GSM482047 CELL  
 13-Lymph-endo-cells GSM482048 CELL  
 12-Lymph-endo-cells GSM482049 CELL  
 11-Lymph-endo-cells GSM482050 CELL  
 10-Lymph-endo-cells GSM482051 CELL  
 9-Lymph-endo-cells GSM482052 CELL  
 8-Lymph-endo-cells GSM482053 CELL  
 7-Lymph-endo-cells GSM482054 CELL  
 6-Lymph-endo-cells GSM482055 CELL  
 5-Lymph-endo-cells GSM482056 CELL  
 4-Lymph-endo-cells GSM482057 CELL  
 3-Lymph-endo-cells GSM482058 CELL  
 2-Lymph-endo-cells GSM482059 CELL  
 1-Lymph-endo-cells GSM482060 CELL



Cluster0081\_Phagocyte-related (26 nodes)

2,795.8  
2,648.6  
2,501.5  
2,354.3  
2,207.2  
2,060  
1,912.9  
1,765.7  
1,618.6  
1,471.5  
1,324.3  
1,177.2  
1,030  
882.9  
735.7  
588.6  
441.4  
294.3  
147.1  
0

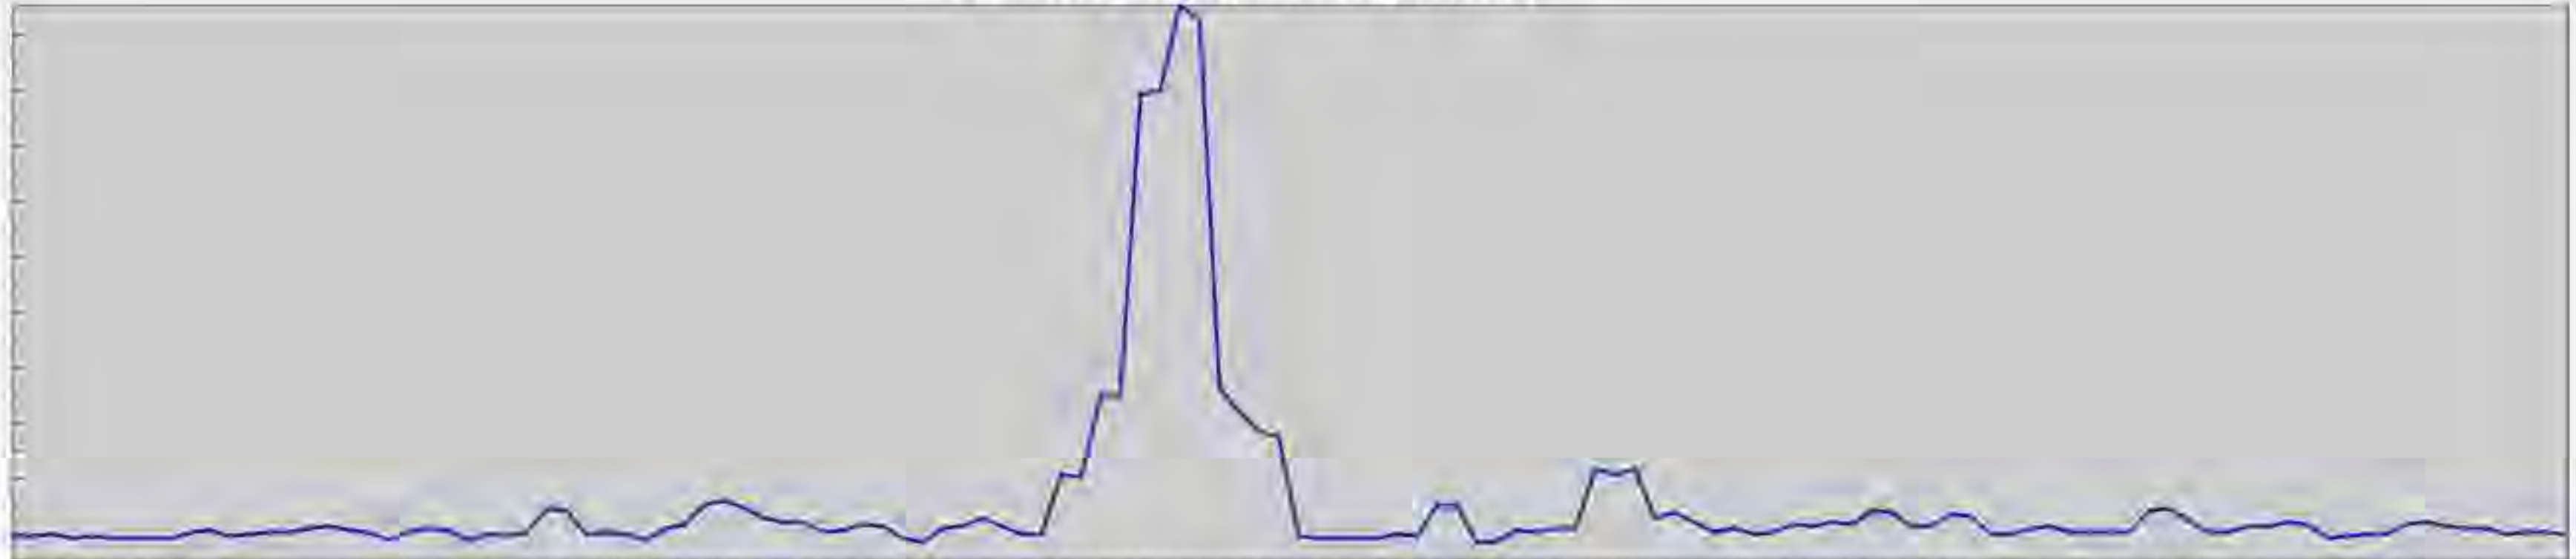

01-PP-M-cells\_GSM190789.CEL  
 02-PP-M-cells\_GSM190790.CEL  
 03-PP-M-cells\_GSM190791.CEL  
 04-CT-V-M-cells\_GSM190792.CEL  
 05-CT-V-M-cells\_GSM190793.CEL  
 06-CT-V-M-cells\_GSM190794.CEL  
 07-Ileum-IEC\_GSM190795.CEL  
 08-Ileum-IEC\_GSM190796.CEL  
 09-Ileum-IEC\_GSM190797.CEL  
 10-FAE-RMPYEP001001.CEL  
 11-FAE-RMPYEP002001.CEL  
 12-Small-intestine-epithelium\_RMINEP001001.CEL  
 13-Small-intestine-epithelium\_RMINEP002001.CEL  
 14-Ileum-IEC\_GSM350371.CEL  
 15-Ileum-IEC\_GSM350375.CEL  
 16-Colon-IEC-Gf\_GSM349880.CEL  
 17-Colon-VIII\_GSM480362.CEL  
 18-Colon-VIII\_GSM480363.CEL  
 19-Colon-VIII\_GSM480364.CEL  
 20-Colon-Crypt\_GSM480374.CEL  
 21-Colon-Crypt\_GSM480375.CEL  
 22-Paneth-cells\_GSM318589.CEL  
 23-Paneth-cells\_GSM318590.CEL  
 24-Paneth-cells\_GSM116359.CEL  
 25-Paneth-cells\_GSM116359.CEL  
 26-Paneth-cells-Gf-1-GSM116357.CEL  
 27-Paneth-cells-Gf-1-GSM116357.CEL  
 28-Paneth-cells-Gf-1-GSM116357.CEL  
 29-Bone marrow\_GSM258628.CEL  
 30-HSC\_GSM258770.CEL  
 31-MEP\_GSM258771.CEL  
 32-MEP\_GSM258772.CEL  
 33-MEP\_GSM258773.CEL  
 34-MEP\_GSM258774.CEL  
 35-MEP\_GSM258775.CEL  
 36-MEP\_GSM258776.CEL  
 37-MEP\_GSM258777.CEL  
 38-MEP\_GSM258778.CEL  
 39-Granulocytes\_GSM258667.CEL  
 40-Mast-cells\_GSM258712.CEL  
 41-Mast-cells-GM+Ad-GSM258718.CEL  
 42-Mast-cells-GM+Ad-GSM258714.CEL  
 43-Mast-cells-GM+Ad-GSM258713.CEL  
 44-Mast-cells-GM+Ad-GSM258714.CEL  
 45-Mast-cells-GM+Ad-GSM258718.CEL  
 46-NK-cells\_GSM258732.CEL  
 47-NK-cells\_GSM258731.CEL  
 48-CD8a+DC\_GSM258646.CEL  
 49-CD8a+DC\_GSM258646.CEL  
 50-CD8a+DC\_GSM258647.CEL  
 51-CD8a+DC\_GSM258647.CEL  
 52-CD8a+DC\_GSM258647.CEL  
 53-CD8a+DC\_GSM258647.CEL  
 54-CD8a+DC\_GSM258647.CEL  
 55-CD8a+DC\_GSM258647.CEL  
 56-CD8a+DC\_GSM258647.CEL  
 57-CD8a+DC\_GSM258647.CEL  
 58-CD8a+DC\_GSM258647.CEL  
 59-CD8a+DC\_GSM258647.CEL  
 60-CD8a+DC\_GSM258647.CEL  
 61-CD8a+DC\_GSM258647.CEL  
 62-Microglia\_GSM258721.CEL  
 63-Microglia\_GSM258721.CEL  
 64-Microglia\_GSM258721.CEL  
 65-Osteoclasts\_GSM258743.CEL  
 66-Thymocyte-DN\_GSM465595.CEL  
 67-T-cells-CD4+GSM258773.CEL  
 68-T-cells-CD4+GSM258774.CEL  
 69-T-cells-CD8+GSM258775.CEL  
 70-T-cells-CD8+GSM258776.CEL  
 71-Tregs\_GSM258777.CEL  
 72-Tregs\_GSM258778.CEL  
 73-Tregs\_GSM258778.CEL  
 74-BAF3\_GSM258620.CEL  
 75-MZ-Bcell\_GSM258621.CEL  
 76-MZ-Bcell\_GSM258621.CEL  
 77-Follicular-Bcells\_GSM258664.CEL  
 78-Follicular-Bcells\_GSM258664.CEL  
 79-Follicular-Bcells\_GSM258664.CEL  
 80-Follicular-Bcells\_GSM258664.CEL  
 81-Follicular-Bcells\_GSM258664.CEL  
 82-Follicular-Bcells\_GSM258664.CEL  
 83-Follicular-Bcells\_GSM258664.CEL  
 84-Lymph-endo-cells\_GSM143704.CEL  
 85-PP-FDC\_GSM481977.CEL  
 86-PP-FDC\_GSM481978.CEL  
 87-PP-FDC\_GSM481979.CEL  
 88-PP-FDC\_GSM481979.CEL  
 89-PP-FDC\_GSM481979.CEL  
 90-PP-FDC\_GSM481979.CEL  
 91-PP-FDC\_GSM481979.CEL  
 92-PP-FDC\_GSM481979.CEL  
 93-PP-FDC\_GSM481979.CEL  
 94-PP-FDC\_GSM481979.CEL  
 95-PP-FDC\_GSM481979.CEL  
 96-PP-FDC\_GSM481979.CEL  
 97-PP-FDC\_GSM481979.CEL  
 98-PP-FDC\_GSM481979.CEL  
 99-PP-FDC\_GSM481979.CEL  
 100-PP-FDC\_GSM481979.CEL  
 101-NH3T3\_GSM258739.CEL  
 102-NH3T3\_GSM258739.CEL  
 103-NH3T3\_GSM258739.CEL  
 104-NH3T3\_GSM258739.CEL  
 105-NH3T3\_GSM258739.CEL  
 106-NH3T3\_GSM258739.CEL  
 107-NH3T3\_GSM258739.CEL  
 108-NH3T3\_GSM258739.CEL  
 109-NH3T3\_GSM258739.CEL  
 110-NH3T3\_GSM258739.CEL  
 111-NH3T3\_GSM258739.CEL  
 112-NH3T3\_GSM258739.CEL  
 113-NH3T3\_GSM258739.CEL  
 114-NH3T3\_GSM258739.CEL  
 115-NH3T3\_GSM258739.CEL  
 116-NH3T3\_GSM258739.CEL  
 117-NH3T3\_GSM258739.CEL  
 118-NH3T3\_GSM258739.CEL  
 119-NH3T3\_GSM258739.CEL  
 120-NH3T3\_GSM258739.CEL  
 121-NH3T3\_GSM258739.CEL  
 122-NH3T3\_GSM258739.CEL  
 123-NH3T3\_GSM258739.CEL  
 124-NH3T3\_GSM258739.CEL  
 125-NH3T3\_GSM258739.CEL  
 126-NH3T3\_GSM258739.CEL  
 127-NH3T3\_GSM258739.CEL  
 128-NH3T3\_GSM258739.CEL  
 129-NH3T3\_GSM258739.CEL  
 130-NH3T3\_GSM258739.CEL



Cluster0082\_Proteolysis-related (25 nodes)

5,944.1  
5,631.2  
5,318.4  
5,005.5  
4,692.7  
4,379.9  
4,067  
3,754.2  
3,441.3  
3,128.5  
2,815.6  
2,502.8  
2,189.9  
1,877.1  
1,564.2  
1,251.4  
938.5  
825.7  
312.8  
0

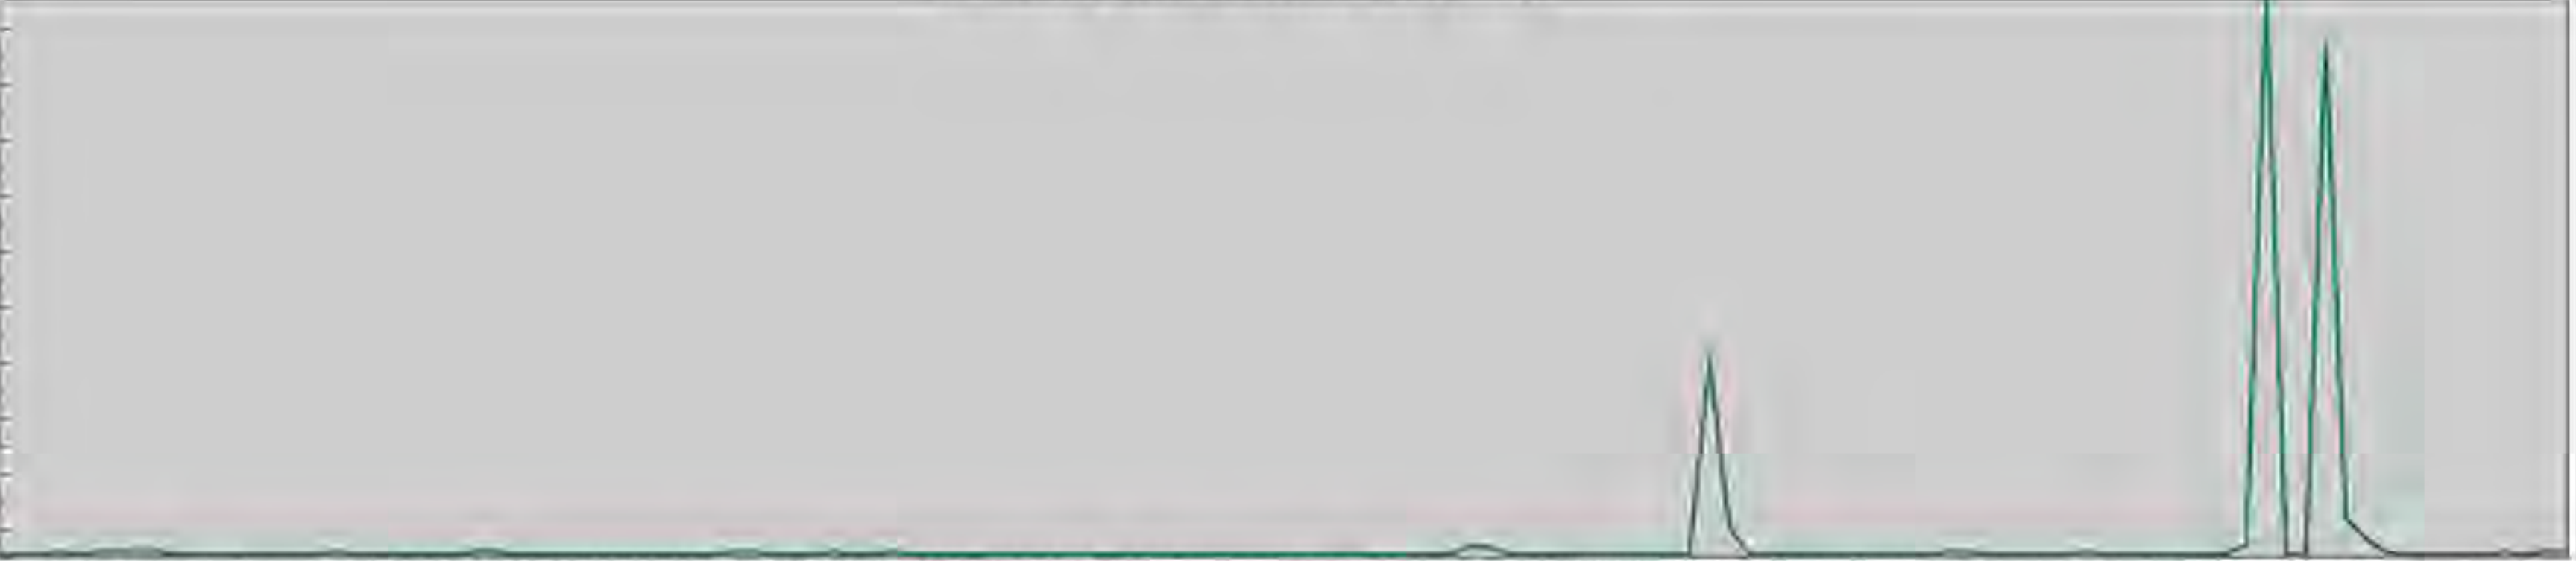

30- NALT GSM289411 CELL  
 129- NALT GSM289410 CELL  
 128- NALT GSM289409 CELL  
 127- NALT GSM289408 CELL  
 126- Colon-d9 GSM1988105 CELL  
 125- Colon-d9 GSM1988104 CELL  
 124- Colon-d9 GSM1988103 CELL  
 123- Colon-d4 GSM1988102 CELL  
 122- Colon-d4 GSM1988101 CELL  
 121- Intestine-large GSM258676 CELL  
 120- Intestine-large GSM258675 CELL  
 119- Intestine-small GSM258674 CELL  
 118- Intestine-small GSM258673 CELL  
 117- Lymph-nodes GSM258672 CELL  
 116- Spleen GSM258671 CELL  
 115- Spleen GSM258670 CELL  
 114- Neuro2a GSM258669 CELL  
 113- Neuro2a GSM258668 CELL  
 112- Astrocytes GSM241898 CELL  
 111- Astrocytes GSM241897 CELL  
 110- mimb GSM2586725 CELL  
 109- mimb GSM2586724 CELL  
 108- MIMCD3 GSM2586723 CELL  
 107- MIMCD3 GSM2586722 CELL  
 106- Bruce4 GSM2586721 CELL  
 105- Bruce4 GSM2586720 CELL  
 104- C2C12 GSM2586719 CELL  
 103- C2C12 GSM2586718 CELL  
 102- NIH3T3 GSM2586739 CELL  
 101- NIH3T3 GSM2586738 CELL  
 100- 3T3-L1 GSM2586737 CELL  
 99- 3T3-L1 GSM2586736 CELL  
 98- 10T1/2 GSM2586932 CELL  
 97- 10T1/2 GSM2586931 CELL  
 96- Osteoblast-d21 GSM258740 CELL  
 95- Osteoblast-d21 GSM258739 CELL  
 94- Osteoblast-d14 GSM258738 CELL  
 93- Osteoblast-d14 GSM258737 CELL  
 92- Osteoblast-d5 GSM258742 CELL  
 91- Osteoblast-d5 GSM258741 CELL  
 90- Chondrocytes GSM266741 CELL  
 89- Chondrocytes GSM266740 CELL  
 88- Nat Helper cell GSM465594 CELL  
 87- Nat Helper cell GSM465593 CELL  
 86- T cell GSM465596 CELL  
 85- MS-1 GSM234692 CELL  
 84- Lymph-endo-cells GSM143704 CELL  
 83- P-PDC GSM481977 CELL  
 82- P-PDC GSM481978 CELL  
 81- P-PDC GSM481976 CELL  
 80- FLY RMLNDCC003001 CELL  
 79- FLY RMLNDCC003001 CELL  
 78- Follicular-B-cells GSM258664 CELL  
 77- Follicular-B-cells GSM258663 CELL  
 76- MZ-Bcell GSM258627 CELL  
 75- MZ-Bcell GSM258627 CELL  
 74- BAF3 GSM258620 CELL  
 73- BAF3 GSM258619 CELL  
 72- Tregs GSM258778 CELL  
 71- Tregs GSM258777 CELL  
 70- T-cells-CD8+ GSM258776 CELL  
 69- T-cells-CD8+ GSM258774 CELL  
 68- T-cells-CD4+ GSM258773 CELL  
 67- T-cells-CD4+ GSM258744 CELL  
 66- Thymocyte-DN GSM465595 CELL  
 65- Osteoclasts GSM258743 CELL  
 64- Osteoclasts GSM258743 CELL  
 63- Microglia GSM258721 CELL  
 62- Microglia GSM258721 CELL  
 61- MM-LPS-7h GSM268706 CELL  
 60- MM-LPS-7h GSM268706 CELL  
 59- MM-LPS-6h GSM268700 CELL  
 58- MM-LPS-6h GSM268699 CELL  
 57- MM-LPS-6h GSM268699 CELL  
 56- MM-LPS-6h GSM268694 CELL  
 55- MM-LPS-6h GSM268694 CELL  
 54- BMM-LPS-6h GSM258694 CELL  
 53- BMM-LPS-6h GSM258694 CELL  
 52- BMM-LPS-6h GSM258694 CELL  
 51- BMM-LPS-6h GSM258694 CELL  
 50- CD8a-DC GSM258647 CELL  
 49- CD8a-DC GSM258647 CELL  
 48- CD8a+DC GSM258646 CELL  
 47- NK-cells GSM258732 CELL  
 46- NK-cells GSM258732 CELL  
 45- Mast-cells-IgE+Ad GSM258718 CELL  
 44- Mast-cells-IgE+Ad GSM258717 CELL  
 43- Mast-cells-IgE GSM258714 CELL  
 42- Mast-cells-IgE GSM258713 CELL  
 41- Mast-cells GSM258712 CELL  
 40- Mast-cells GSM258712 CELL  
 39- Granulocytes GSM258667 CELL  
 38- Granulocytes GSM258667 CELL  
 37- GMF GSM258666 CELL  
 36- GMF GSM258666 CELL  
 35- GMF GSM258666 CELL  
 34- GMF GSM258666 CELL  
 33- MUEP GSM2586720 CELL  
 32- MUEP GSM2586719 CELL  
 31- HSC GSM258770 CELL  
 30- HSC GSM258769 CELL  
 29- Bone marrow GSM258628 CELL  
 28- Bone marrow GSM258627 CELL  
 27- Paneth-cells-GF-1 GSM116357 CELL  
 26- Paneth-cells-GF-1 GSM116357 CELL  
 25- Paneth-cells GSM116350 CELL  
 24- Paneth-cells GSM116359 CELL  
 23- Paneth-cells GSM318589 CELL  
 22- Paneth-cells GSM318590 CELL  
 21- Colon-Crypt GSM480375 CELL  
 20- Colon-Crypt GSM480374 CELL  
 19- Colon-Vill GSM480363 CELL  
 18- Colon-Vill GSM480362 CELL  
 17- Colon-IEC-GF GSM349880 CELL  
 16- Colon-IEC-GF GSM350375 CELL  
 15- Ileum-IEC-GF GSM350376 CELL  
 14- Ileum-IEC GSM350371 CELL  
 13- Small-intestine-epithelium RMINEP002901 CELL  
 12- Small-intestine-epithelium RMINEP001001 CELL  
 11- FAE-RMPYEP001001 CELL  
 10- FAE-RMPYEP001001 CELL  
 09- Ileum-IEC GSM190797 CELL  
 08- Ileum-IEC GSM190796 CELL  
 07- Ileum-IEC GSM190795 CELL  
 06- CT-w-M-cells GSM190794 CELL  
 05- CT-y-M-cells GSM190793 CELL  
 04- CT-y-M-cells GSM190792 CELL  
 03- PP-M-cells GSM190791 CELL  
 02- PP-M-cells GSM190790 CELL  
 01- PP-M-cells GSM190789 CELL



Cluster0083\_High in NKcells, T cells and B cells (25 nodes)

2,371.9  
2,247.1  
2,122.2  
1,997.4  
1,872.6  
1,747.7  
1,622.9  
1,498.1  
1,373.2  
1,248.4  
1,123.5  
998.7  
873.9  
749  
624.2  
499.4  
374.5  
249.7  
124.8  
0

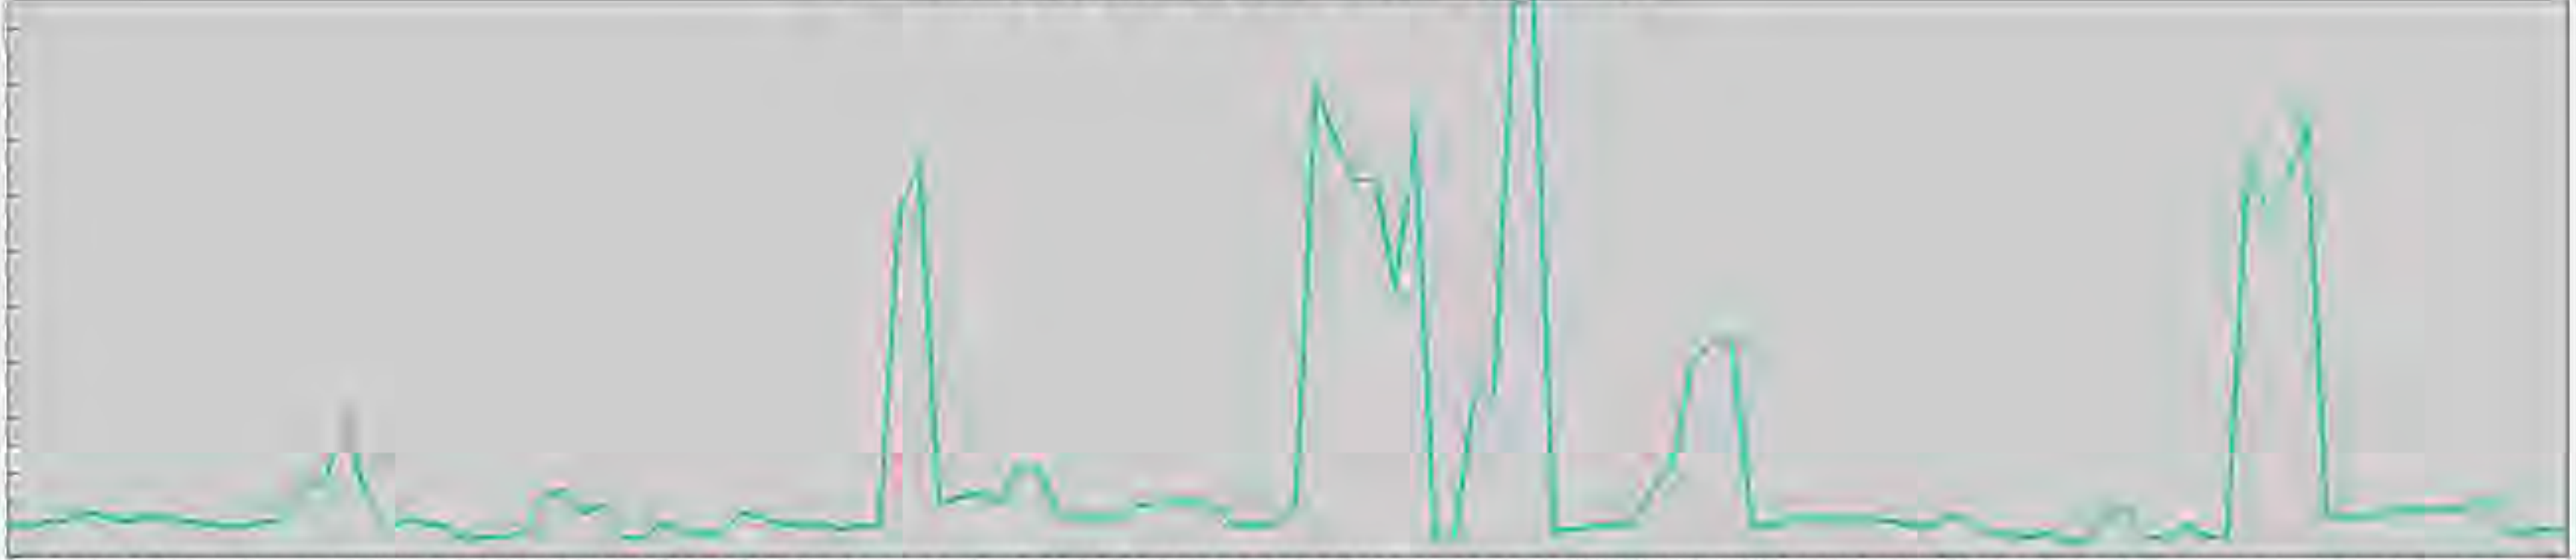

130-NALT GSM289411.CEL  
129-NALT GSM289410.CEL  
128-NALT GSM289409.CEL  
127-NALT GSM289408.CEL  
126-Colon-d9 GSM1988105.CEL  
125-Colon-d9 GSM1988104.CEL  
124-Colon-d9 GSM1988103.CEL  
123-Colon-d4 GSM1988102.CEL  
122-Colon-d4 GSM1988101.CEL  
121-Intestine-large GSM258676.CEL  
120-Intestine-large GSM258675.CEL  
119-Intestine-small GSM258678.CEL  
118-Intestine-small GSM258692.CEL  
117-Lymph-nodes GSM258691.CEL  
116-Lymph-nodes GSM258768.CEL  
115-Spleen GSM258767.CEL  
114-Spleen GSM258767.CEL  
113-Neuro2a GSM258727.CEL  
112-Neuro2a GSM241898.CEL  
111-Astrocytes GSM241898.CEL  
110-ming GSM258726.CEL  
109-ming GSM258725.CEL  
108-MIMCD3 GSM258724.CEL  
107-MIMCD3 GSM258723.CEL  
106-Bruce4 GSM258656.CEL  
105-Bruce4 GSM258656.CEL  
104-C2C12 GSM258690.CEL  
103-C2C12 GSM258629.CEL  
102-NH3T3 GSM258739.CEL  
101-NH3T3 GSM258739.CEL  
100-3T3-L1 GSM258610.CEL  
99-3T3-L1 GSM258609.CEL  
98-10T12 GSM258631.CEL  
97-10T12 GSM258631.CEL  
96-Osteoblast-d21 GSM258740.CEL  
95-Osteoblast-d21 GSM258739.CEL  
94-Osteoblast-d14 GSM258738.CEL  
93-Osteoblast-d14 GSM258737.CEL  
92-Osteoblast-d5 GSM258742.CEL  
91-Osteoblast-d5 GSM258741.CEL  
90-Chondrocytes GSM266741.CEL  
89-Chondrocytes GSM266740.CEL  
88-Nat Helper cell GSM465594.CEL  
87-Nat Helper cell GSM465593.CEL  
86-TT cell GSM465596.CEL  
85-MS-1 GSM234692.CEL  
84-Lymph-endo-cells GSM143704.CEL  
83-PP-FDC GSM481977.CEL  
82-PP-FDC GSM481978.CEL  
81-PP-FDC GSM481976.CEL  
80-F-LY RMLNDC003001.CEL  
79-F-LY RMLNDC003001.CEL  
78-Follicular-Bcells GSM258664.CEL  
77-Follicular-Bcells GSM258663.CEL  
76-MZ-Bcell GSM258627.CEL  
75-MZ-Bcell GSM258627.CEL  
74-BAF3 GSM258620.CEL  
73-BAF3 GSM258619.CEL  
72-Tregs GSM258778.CEL  
71-Tregs GSM258777.CEL  
70-T-cells-CD8+ GSM258776.CEL  
69-T-cells-CD8+ GSM258774.CEL  
68-T-cells-CD4+ GSM258773.CEL  
67-T-cells-CD4+ GSM258744.CEL  
66-Thymocyte-DN GSM465595.CEL  
65-Osteoclasts GSM258743.CEL  
64-Osteoclasts GSM258743.CEL  
63-Microglia GSM258721.CEL  
62-Microglia GSM258721.CEL  
61-PM-M-PS-7h GSM258706.CEL  
60-PM-M-PS-7h GSM258705.CEL  
59-PM-M-PS-7h GSM258702.CEL  
58-PM-M-PS-6h GSM258701.CEL  
57-PM-M-PS-6h GSM258699.CEL  
56-PM-M-PS-6h GSM258699.CEL  
55-BMM-LPS-6h GSM258699.CEL  
54-BMM-LPS-6h GSM258699.CEL  
53-Plasmacytoid-DC GSM258650.CEL  
52-CD8a-DC GSM258647.CEL  
51-CD8a-DC GSM258647.CEL  
50-CD8a-DC GSM258647.CEL  
49-CD8a+DC GSM258646.CEL  
48-CD8a+DC GSM258646.CEL  
47-NK-cells GSM258732.CEL  
46-NK-cells GSM258732.CEL  
45-Mast-cells-IgE+Ad GSM258718.CEL  
44-Mast-cells-IgE+Ad GSM258717.CEL  
43-Mast-cells-IgE GSM258714.CEL  
42-Mast-cells-IgE GSM258713.CEL  
41-Mast-cells GSM258712.CEL  
40-Granulocytes GSM258668.CEL  
39-Granulocytes GSM258667.CEL  
38-GMP GSM258666.CEL  
37-GMP GSM258666.CEL  
36-GMP GSM258666.CEL  
35-CMP GSM258642.CEL  
34-MEP GSM258641.CEL  
33-MEP GSM258720.CEL  
32-MEP GSM258719.CEL  
31-HSC GSM258770.CEL  
30-HSC GSM258770.CEL  
29-Bone marrow GSM258628.CEL  
28-Bone marrow GSM258627.CEL  
27-paneth-cells-GE GSM116358.CEL  
26-paneth-cells-GE GSM116357.CEL  
25-paneth-cells GSM116350.CEL  
24-paneth-cells GSM116359.CEL  
23-paneth-cells GSM318589.CEL  
22-paneth-cells GSM318590.CEL  
21-Colon-Crypt GSM480375.CEL  
20-Colon-Crypt GSM480374.CEL  
19-Colon-Vill GSM480363.CEL  
18-Colon-Vill GSM480362.CEL  
17-Colon-IEC-GE GSM349880.CEL  
16-Colon-IEC-GE GSM350375.CEL  
15-Ileum-IEC GSM350376.CEL  
14-Ileum-IEC GSM350371.CEL  
13-Small-intestine-epithelium RMINEP002901.CEL  
12-Small-intestine-epithelium RMINEP001001.CEL  
11-FAE RMPYEP002001.CEL  
10-FAE RMPYEP001001.CEL  
09-Ileum-IEC GSM190797.CEL  
08-Ileum-IEC GSM190796.CEL  
07-Ileum-IEC GSM190795.CEL  
06-CT-v-M-cells GSM190794.CEL  
05-CT-v-M-cells GSM190793.CEL  
04-PP-M-cells GSM190792.CEL  
03-PP-M-cells GSM190791.CEL  
02-PP-M-cells GSM190790.CEL  
01-PP-M-cells GSM190789.CEL



Cluster0084\_Intestine-related (25 nodes)

1,360.2  
1,288.6  
1,217  
1,145.4  
1,073.6  
1,002.9  
930.7  
859.1  
787.5  
715.9  
644.3  
572.7  
501.1  
429.5  
357.9  
286.4  
214.8  
143.2  
71.6  
0

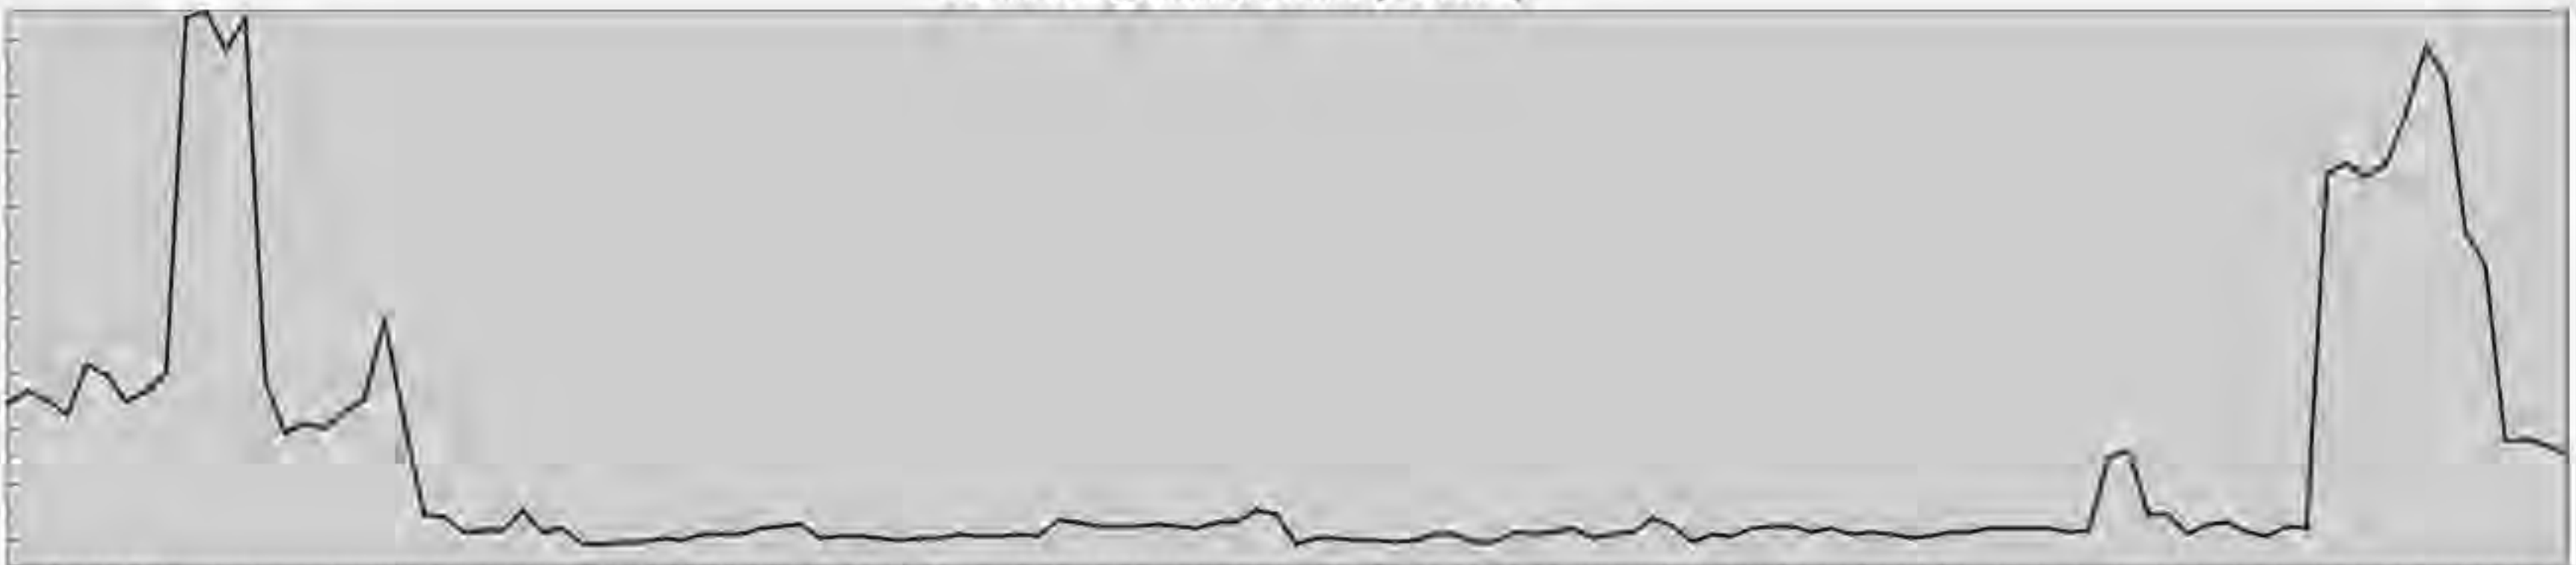

01-PP-M-cells\_GSM190789.CEL  
 02-PP-M-cells\_GSM190791.CEL  
 03-PP-M-cells\_GSM190792.CEL  
 04-CT-Y-M-cells\_GSM190793.CEL  
 05-CT-Y-M-cells\_GSM190794.CEL  
 06-CT-W-M-cells\_GSM190795.CEL  
 07-Ileum-IEC\_GSM190796.CEL  
 08-Ileum-IEC\_GSM190797.CEL  
 09-Ileum-IEC\_GSM190798.CEL  
 10-FAE-RMPYE001001.CEL  
 11-FAE-RMPYE001001.CEL  
 12-Small-intestine-epithelium\_RMINEP001001.CEL  
 13-Small-intestine-epithelium\_RMINEP002001.CEL  
 14-Ileum-IEC\_GSM350371.CEL  
 15-Ileum-IEC\_GSM350375.CEL  
 16-Color-VIII\_GSM480362.CEL  
 17-Color-VIII\_GSM480362.CEL  
 18-Color-VIII\_GSM480362.CEL  
 19-Color-VIII\_GSM480362.CEL  
 20-Color-Crypt\_GSM480374.CEL  
 21-Color-Crypt\_GSM480375.CEL  
 22-Paneth-cells\_GSM318589.CEL  
 23-Paneth-cells\_GSM318589.CEL  
 24-Paneth-cells\_GSM116359.CEL  
 25-Paneth-cells\_GSM116359.CEL  
 26-Paneth-cells-GF-1-GSM116357.CEL  
 27-Paneth-cells-GF-1-GSM116357.CEL  
 28-Bone marrow\_GSM258627.CEL  
 29-Bone marrow\_GSM258627.CEL  
 30-NALT\_GSM289411.CEL  
 31-NALT\_GSM289410.CEL  
 32-NALT\_GSM289409.CEL  
 33-NALT\_GSM289408.CEL  
 34-Color-d9-GSM198810.CEL  
 35-Color-d9-GSM198810.CEL  
 36-Color-d9-GSM198810.CEL  
 37-Color-d9-GSM198810.CEL  
 38-Color-d4-GSM198810.CEL  
 39-Color-d4-GSM198810.CEL  
 40-Intestine-large\_GSM258676.CEL  
 41-Intestine-large\_GSM258675.CEL  
 42-Intestine-small\_GSM258677.CEL  
 43-Intestine-small\_GSM258677.CEL  
 44-Spleen\_GSM258728.CEL  
 45-Spleen\_GSM258728.CEL  
 46-Neuro2a\_GSM241898.CEL  
 47-Neuro2a\_GSM241898.CEL  
 48-Astrocytes\_GSM241898.CEL  
 49-mimb\_GSM258725.CEL  
 50-mimb\_GSM258725.CEL  
 51-mimb\_GSM258725.CEL  
 52-MIMCD3\_GSM258723.CEL  
 53-MIMCD3\_GSM258723.CEL  
 54-Brice4\_GSM258690.CEL  
 55-Brice4\_GSM258690.CEL  
 56-Brice4\_GSM258690.CEL  
 57-NH3T3\_GSM258730.CEL  
 58-NH3T3\_GSM258730.CEL  
 59-3T3-L1\_GSM258610.CEL  
 60-3T3-L1\_GSM258610.CEL  
 61-3T3-L1\_GSM258610.CEL  
 62-10T12\_GSM258631.CEL  
 63-10T12\_GSM258631.CEL  
 64-10T12\_GSM258631.CEL  
 65-Osteoblast-d21\_GSM258740.CEL  
 66-Osteoblast-d21\_GSM258739.CEL  
 67-Osteoblast-d14\_GSM258738.CEL  
 68-Osteoblast-d14\_GSM258737.CEL  
 69-Osteoblast-d5\_GSM258742.CEL  
 70-Osteoblast-d5\_GSM258741.CEL  
 71-Chondrocytes\_GSM2586741.CEL  
 72-Chondrocytes\_GSM2586740.CEL  
 73-Nat Helper cell\_GSM465594.CEL  
 74-Nat Helper cell\_GSM465594.CEL  
 75-LT cell\_GSM465596.CEL  
 76-MS-1\_GSM234692.CEL  
 77-Lymph-endo-cells\_GSM143704.CEL  
 78-Lymph-endo-cells\_GSM143704.CEL  
 79-PP-FDC\_GSM481977.CEL  
 80-PP-FDC\_GSM481978.CEL  
 81-PP-FDC\_GSM481978.CEL  
 82-PP-FDC\_GSM481978.CEL  
 83-PP-FDC\_GSM481978.CEL  
 84-PP-FDC\_GSM481978.CEL  
 85-PP-FDC\_GSM481978.CEL  
 86-PP-FDC\_GSM481978.CEL  
 87-PP-FDC\_GSM481978.CEL  
 88-PP-FDC\_GSM481978.CEL  
 89-PP-FDC\_GSM481978.CEL  
 90-PP-FDC\_GSM481978.CEL  
 91-PP-FDC\_GSM481978.CEL  
 92-PP-FDC\_GSM481978.CEL  
 93-PP-FDC\_GSM481978.CEL  
 94-PP-FDC\_GSM481978.CEL  
 95-PP-FDC\_GSM481978.CEL  
 96-PP-FDC\_GSM481978.CEL  
 97-PP-FDC\_GSM481978.CEL  
 98-PP-FDC\_GSM481978.CEL  
 99-PP-FDC\_GSM481978.CEL  
 100-PP-FDC\_GSM481978.CEL  
 101-PP-FDC\_GSM481978.CEL  
 102-PP-FDC\_GSM481978.CEL  
 103-PP-FDC\_GSM481978.CEL  
 104-PP-FDC\_GSM481978.CEL  
 105-PP-FDC\_GSM481978.CEL  
 106-PP-FDC\_GSM481978.CEL  
 107-PP-FDC\_GSM481978.CEL  
 108-PP-FDC\_GSM481978.CEL  
 109-PP-FDC\_GSM481978.CEL  
 110-PP-FDC\_GSM481978.CEL  
 111-PP-FDC\_GSM481978.CEL  
 112-PP-FDC\_GSM481978.CEL  
 113-PP-FDC\_GSM481978.CEL  
 114-PP-FDC\_GSM481978.CEL  
 115-PP-FDC\_GSM481978.CEL  
 116-PP-FDC\_GSM481978.CEL  
 117-PP-FDC\_GSM481978.CEL  
 118-PP-FDC\_GSM481978.CEL  
 119-PP-FDC\_GSM481978.CEL  
 120-PP-FDC\_GSM481978.CEL  
 121-PP-FDC\_GSM481978.CEL  
 122-PP-FDC\_GSM481978.CEL  
 123-PP-FDC\_GSM481978.CEL  
 124-PP-FDC\_GSM481978.CEL  
 125-PP-FDC\_GSM481978.CEL  
 126-PP-FDC\_GSM481978.CEL  
 127-PP-FDC\_GSM481978.CEL  
 128-PP-FDC\_GSM481978.CEL  
 129-PP-FDC\_GSM481978.CEL  
 130-PP-FDC\_GSM481978.CEL



Cluster0085\_High in haematopoietic cells (25 nodes)

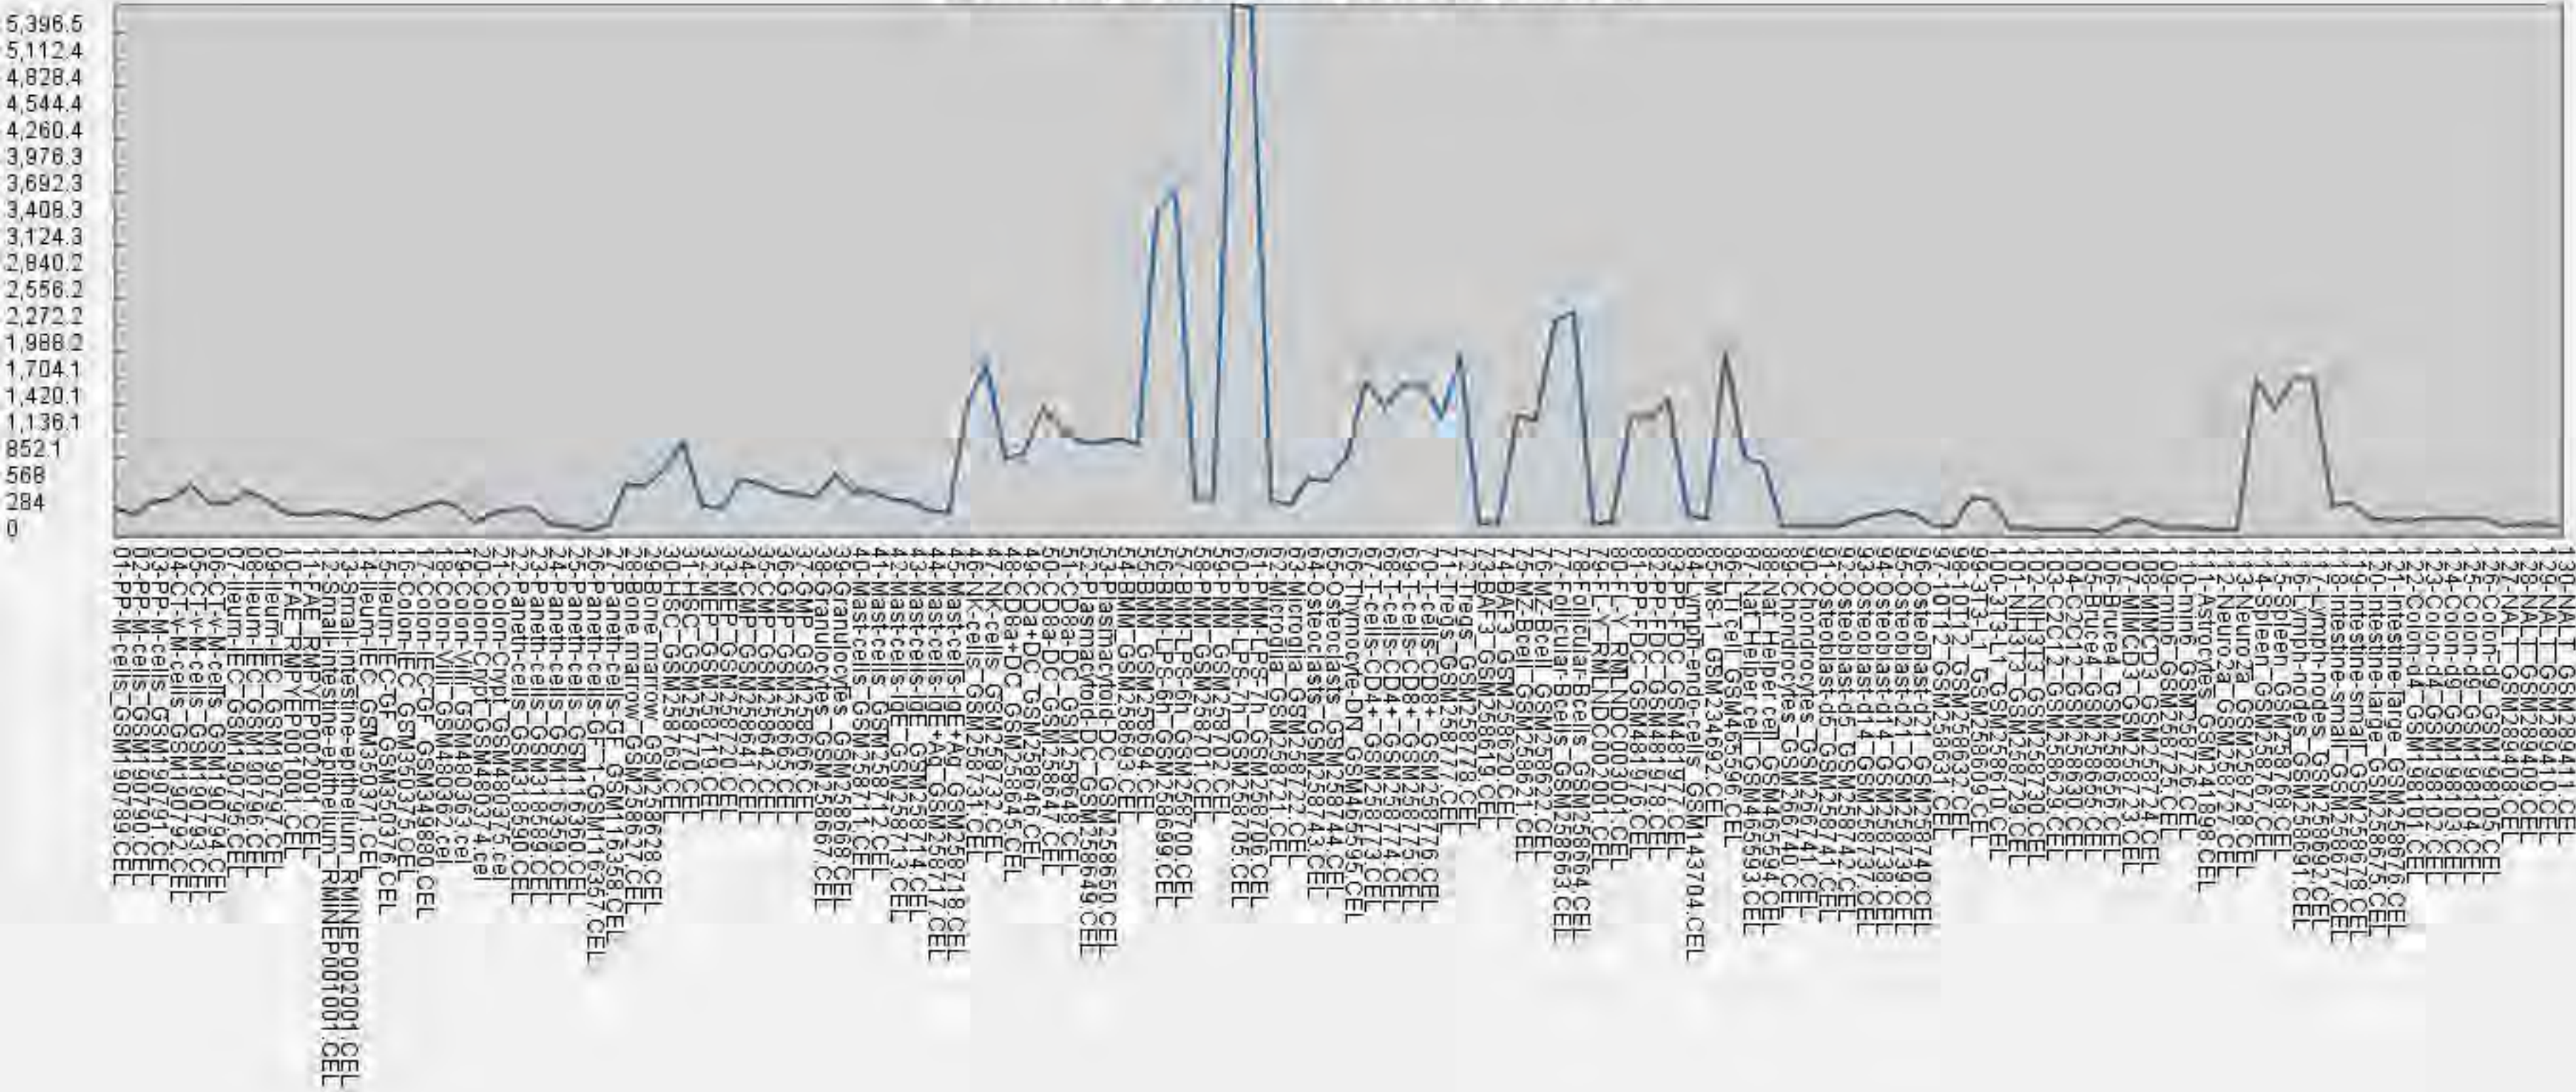



Cluster0086\_Affymetrix control probe sets (24 nodes)

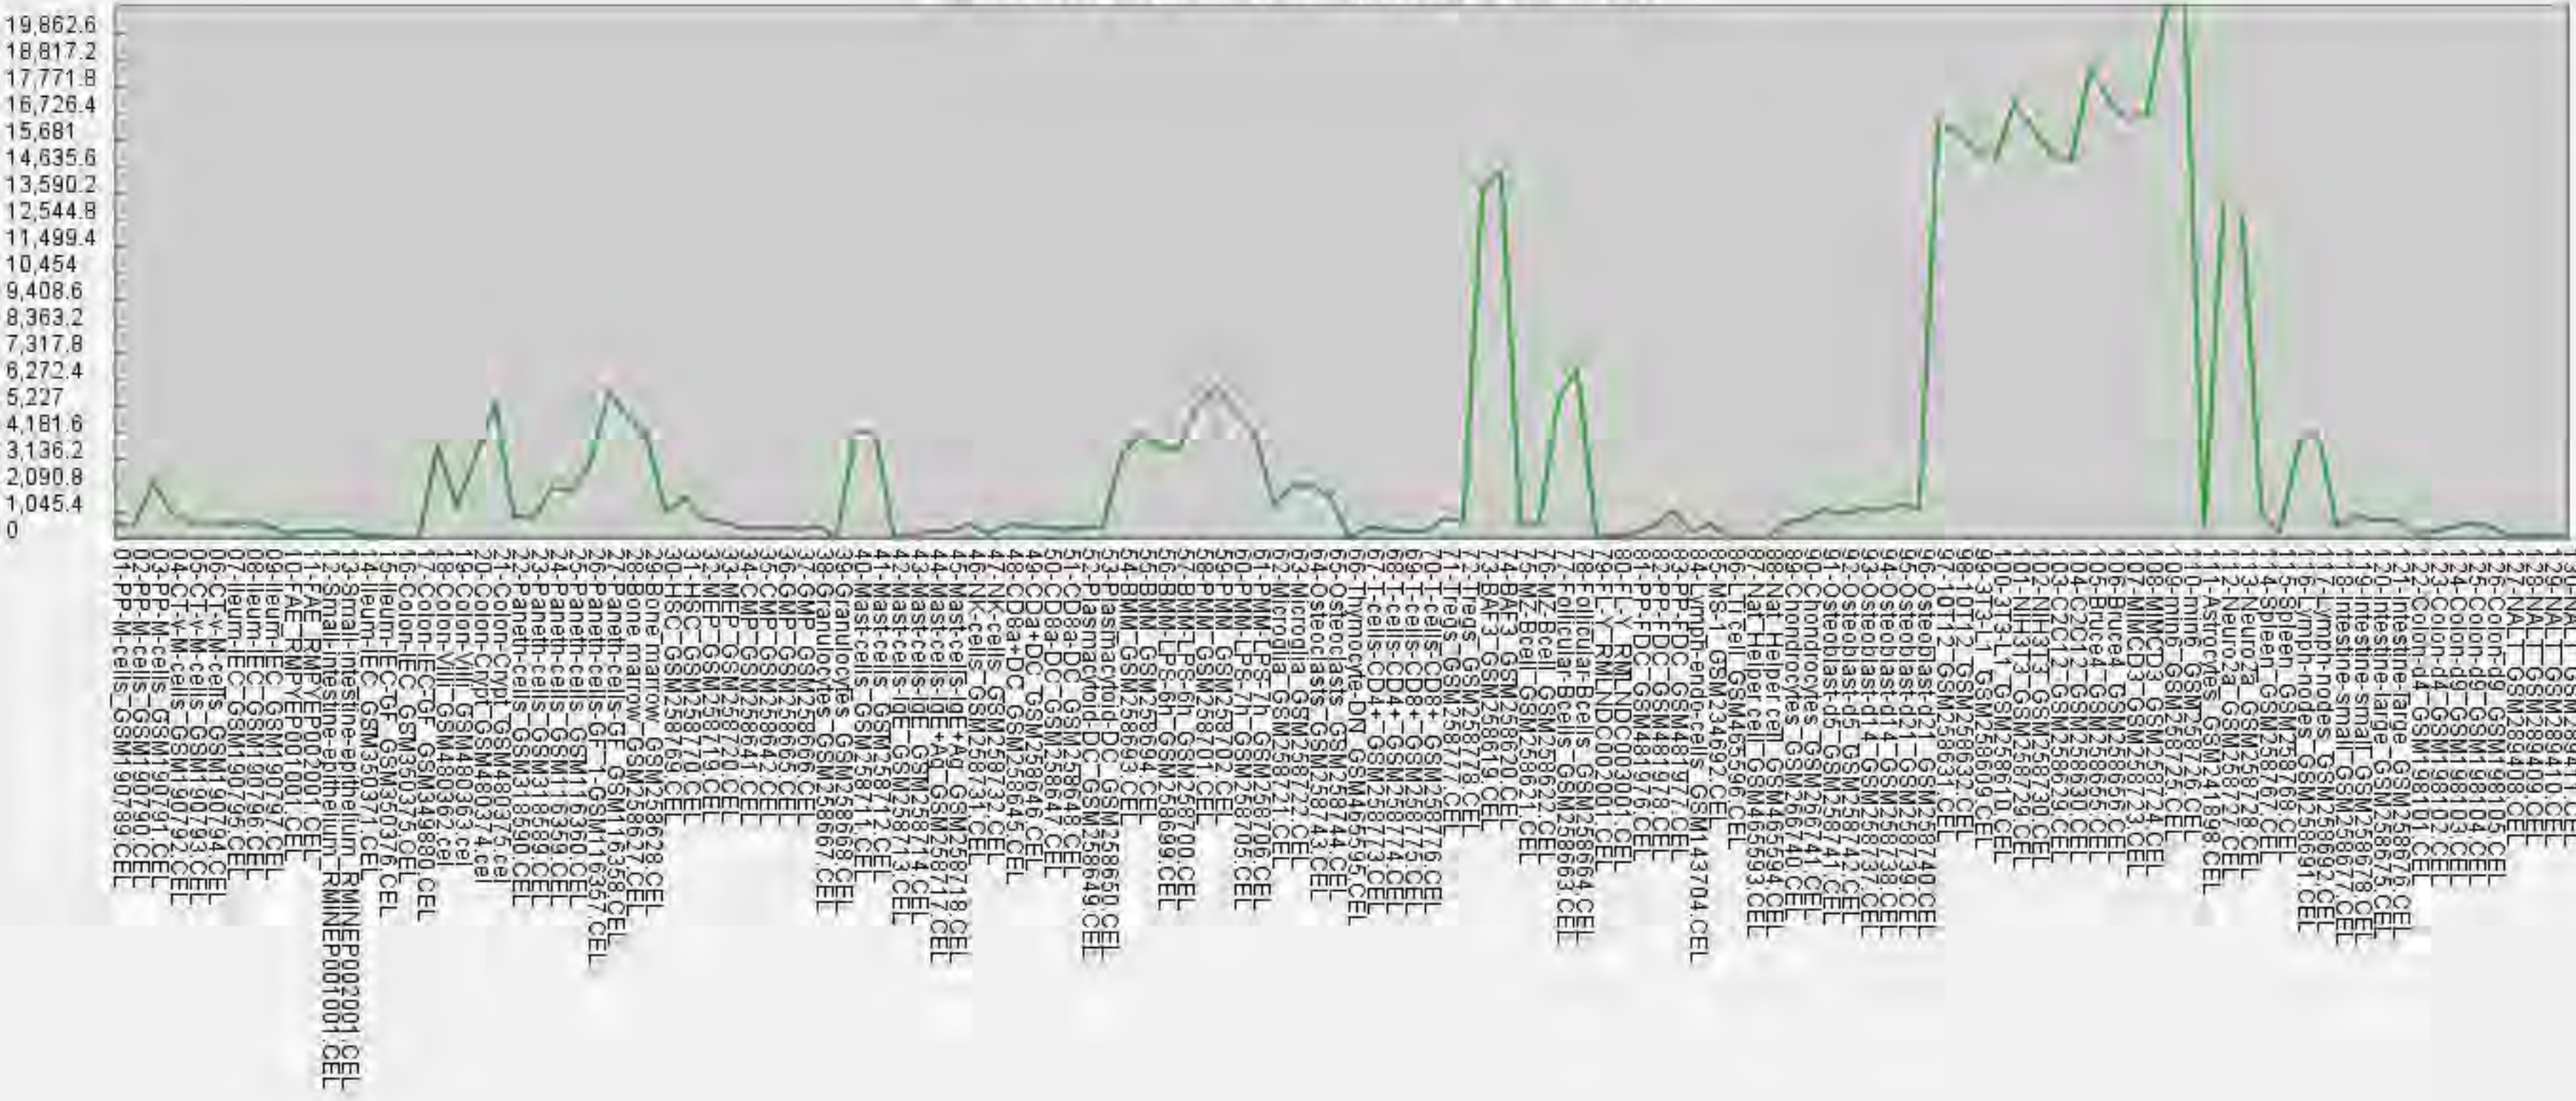



Cluster0087\_House keeping-cell cycle (24 nodes)

1,267.4  
1,200.7  
1,134  
1,067.3  
1,000.6  
933.9  
867.2  
800.5  
733.8  
667  
600.3  
533.6  
466.9  
400.2  
333.5  
266.8  
200.1  
133.4  
66.7  
0

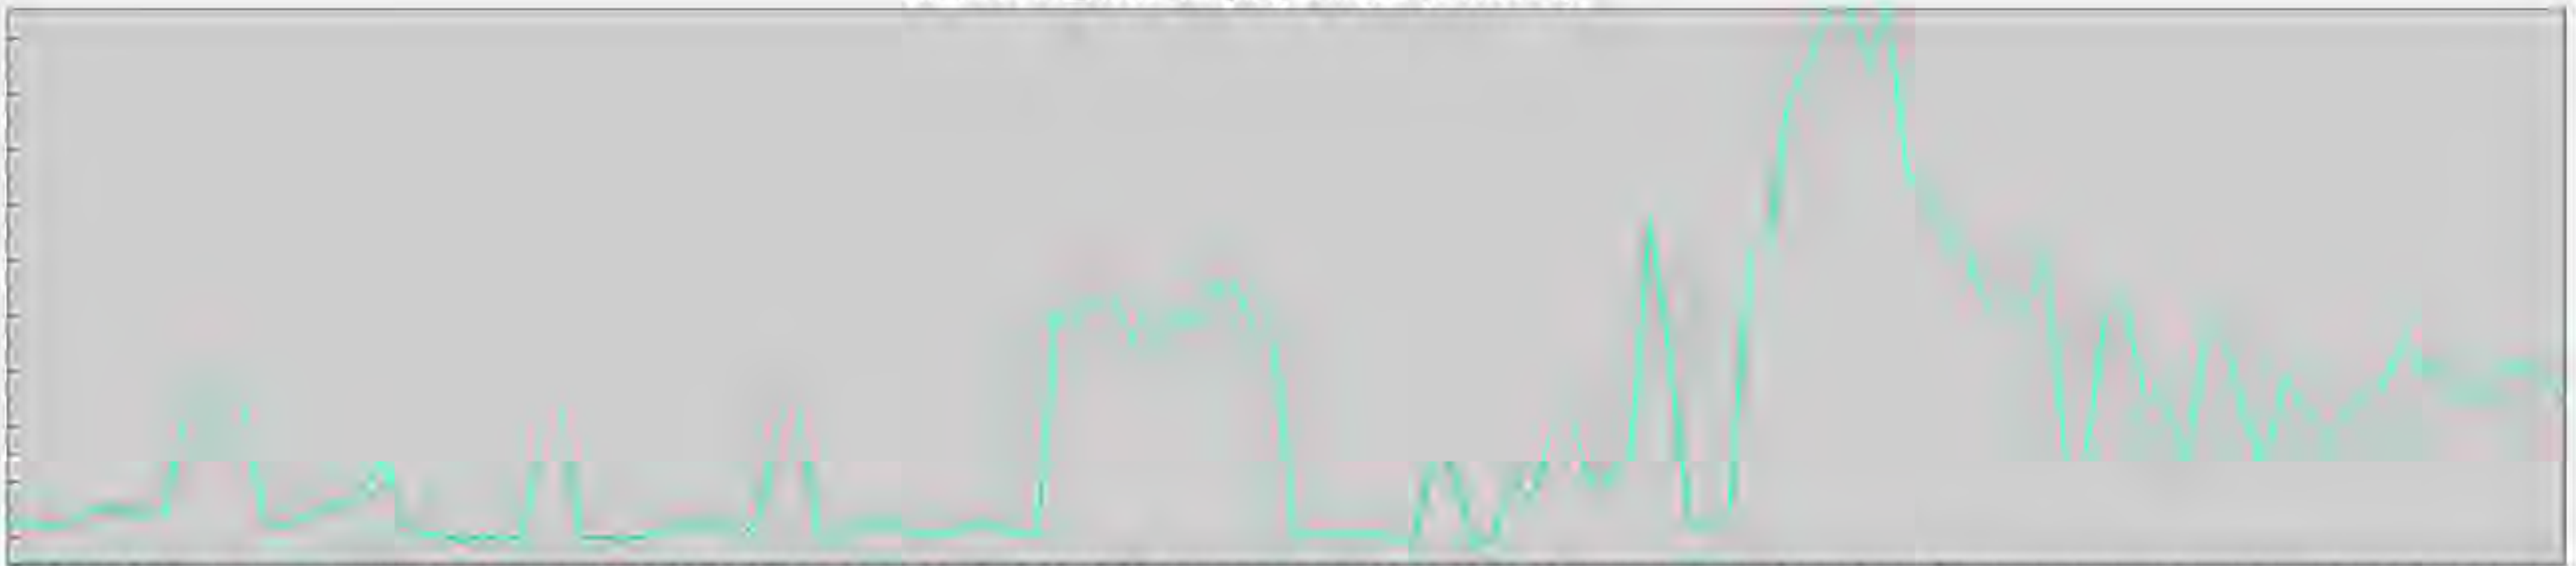

130-NALT GSM289411.CEL  
129-NALT GSM289410.CEL  
128-NALT GSM289409.CEL  
127-NALT GSM289408.CEL  
126-Colon-d9 GSM1988105.CEL  
125-Colon-d9 GSM1988104.CEL  
124-Colon-d9 GSM1988103.CEL  
123-Colon-d4 GSM1988102.CEL  
122-Colon-d4 GSM1988101.CEL  
121-Intestine-large GSM258676.CEL  
120-Intestine-large GSM258675.CEL  
119-Intestine-small GSM258678.CEL  
118-Intestine-small GSM258692.CEL  
117-Lymph-nodes GSM258691.CEL  
116-Lymph-nodes GSM258726.CEL  
115-Spleen GSM258768.CEL  
114-Spleen GSM258767.CEL  
113-Neuro2a GSM258728.CEL  
112-Neuro2a GSM258727.CEL  
111-Astrocytes GSM241898.CEL  
110-mim6 GSM258725.CEL  
109-mim6 GSM258724.CEL  
108-MIMCD3 GSM258723.CEL  
107-MIMCD3 GSM258722.CEL  
106-Bruce4 GSM258656.CEL  
105-Bruce4 GSM258655.CEL  
104-C2C12 GSM258690.CEL  
103-C2C12 GSM258689.CEL  
102-NH3T3 GSM258739.CEL  
101-NH3T3 GSM258738.CEL  
100-3T3-L1 GSM258610.CEL  
99-3T3-L1 GSM258609.CEL  
98-10T12 GSM258632.CEL  
97-10T12 GSM258631.CEL  
96-Osteoblast-d21 GSM258740.CEL  
95-Osteoblast-d21 GSM258739.CEL  
94-Osteoblast-d14 GSM258738.CEL  
93-Osteoblast-d14 GSM258737.CEL  
92-Osteoblast-d5 GSM258742.CEL  
91-Osteoblast-d5 GSM258741.CEL  
90-Chondrocytes GSM266741.CEL  
89-Chondrocytes GSM266740.CEL  
88-Nat Helper cell GSM465594.CEL  
87-Nat Helper cell GSM465593.CEL  
86-TT cell GSM465596.CEL  
85-MS-1 GSM234692.CEL  
84-Lymph-endo-cells GSM143704.CEL  
83-PP-FDC GSM481977.CEL  
82-PP-FDC GSM481978.CEL  
81-PP-FDC GSM481976.CEL  
80-L-Y RMLNDCC003001.CEL  
79-L-Y RMLNDCC003001.CEL  
78-Follicular-Bcells GSM258664.CEL  
77-Follicular-Bcells GSM258663.CEL  
76-MZ-Bcell GSM258622.CEL  
75-MZ-Bcell GSM258621.CEL  
74-BAF3 GSM258620.CEL  
73-BAF3 GSM258619.CEL  
72-Tregs GSM258778.CEL  
71-Tregs GSM258777.CEL  
70-T-cells-CD8+ GSM258776.CEL  
69-T-cells-CD8+ GSM258775.CEL  
68-T-cells-CD4+ GSM258774.CEL  
67-T-cells-CD4+ GSM258773.CEL  
66-Thymocyte-DN GSM465595.CEL  
65-Osteoclasts GSM258744.CEL  
64-Osteoclasts GSM258743.CEL  
63-Microglia GSM258721.CEL  
62-Microglia GSM258721.CEL  
61-PM-M-LPS-7h GSM258706.CEL  
60-PM-M-LPS-7h GSM258705.CEL  
59-PM-M-LPS-7h GSM258702.CEL  
58-PM-M-LPS-6h GSM258701.CEL  
57-PM-M-LPS-6h GSM258699.CEL  
56-PM-M-LPS-6h GSM258699.CEL  
55-BMM GSM258694.CEL  
54-BMM GSM258694.CEL  
53-Plasmacytoid-DC GSM258650.CEL  
52-Plasmacytoid-DC GSM258649.CEL  
51-CD8a-DC GSM258648.CEL  
50-CD8a-DC GSM258647.CEL  
49-CD8a+DC GSM258646.CEL  
48-CD8a+DC GSM258645.CEL  
47-NK-cells GSM258732.CEL  
46-NK-cells GSM258731.CEL  
45-Mast-cells-IgE+Ad GSM258718.CEL  
44-Mast-cells-IgE+Ad GSM258717.CEL  
43-Mast-cells-IgE GSM258714.CEL  
42-Mast-cells-IgE GSM258713.CEL  
41-Mast-cells GSM258712.CEL  
40-Granulocytes GSM258668.CEL  
39-Granulocytes GSM258667.CEL  
38-GMP GSM258666.CEL  
37-GMP GSM258665.CEL  
36-GMP GSM258664.CEL  
35-CMP GSM258642.CEL  
34-CMP GSM258641.CEL  
33-MEP GSM258720.CEL  
32-MEP GSM258719.CEL  
31-HSC GSM258770.CEL  
30-HSC GSM258769.CEL  
29-Bone marrow GSM258628.CEL  
28-Bone marrow GSM258627.CEL  
27-paneth-cells-GE GSM116358.CEL  
26-paneth-cells-GE GSM116357.CEL  
25-paneth-cells GSM116350.CEL  
24-paneth-cells GSM116359.CEL  
23-paneth-cells GSM318589.CEL  
22-paneth-cells GSM318590.CEL  
21-Colon-Crypt GSM480375.CEL  
20-Colon-Crypt GSM480374.CEL  
19-Colon-Vill GSM480363.CEL  
18-Colon-Vill GSM480362.CEL  
17-Colon-IEC-GE GSM349880.CEL  
16-Colon-IEC-GE GSM350375.CEL  
15-Ileum-IEC GSM350376.CEL  
14-Ileum-IEC GSM350371.CEL  
13-Small-intestine-epithelium RMINEP002001.CEL  
12-Small-intestine-epithelium RMINEP001001.CEL  
11-FAE RMPYEP002001.CEL  
10-FAE RMPYEP001001.CEL  
09-Ileum-IEC GSM190797.CEL  
08-Ileum-IEC GSM190796.CEL  
07-Ileum-IEC GSM190795.CEL  
06-CT-v-M-cells GSM190794.CEL  
05-CT-v-M-cells GSM190793.CEL  
04-CT-v-M-cells GSM190792.CEL  
03-PP-M-cells GSM190791.CEL  
02-PP-M-cells GSM190790.CEL  
01-PP-M-cells GSM190789.CEL



Cluster0088\_Low in some Paneth cells (23 nodes)

109.5  
103.7  
98  
92.2  
86.4  
80.7  
74.9  
69.1  
63.4  
57.6  
51.9  
46.1  
40.3  
34.6  
28.8  
23  
17.3  
11.5  
5.8  
0

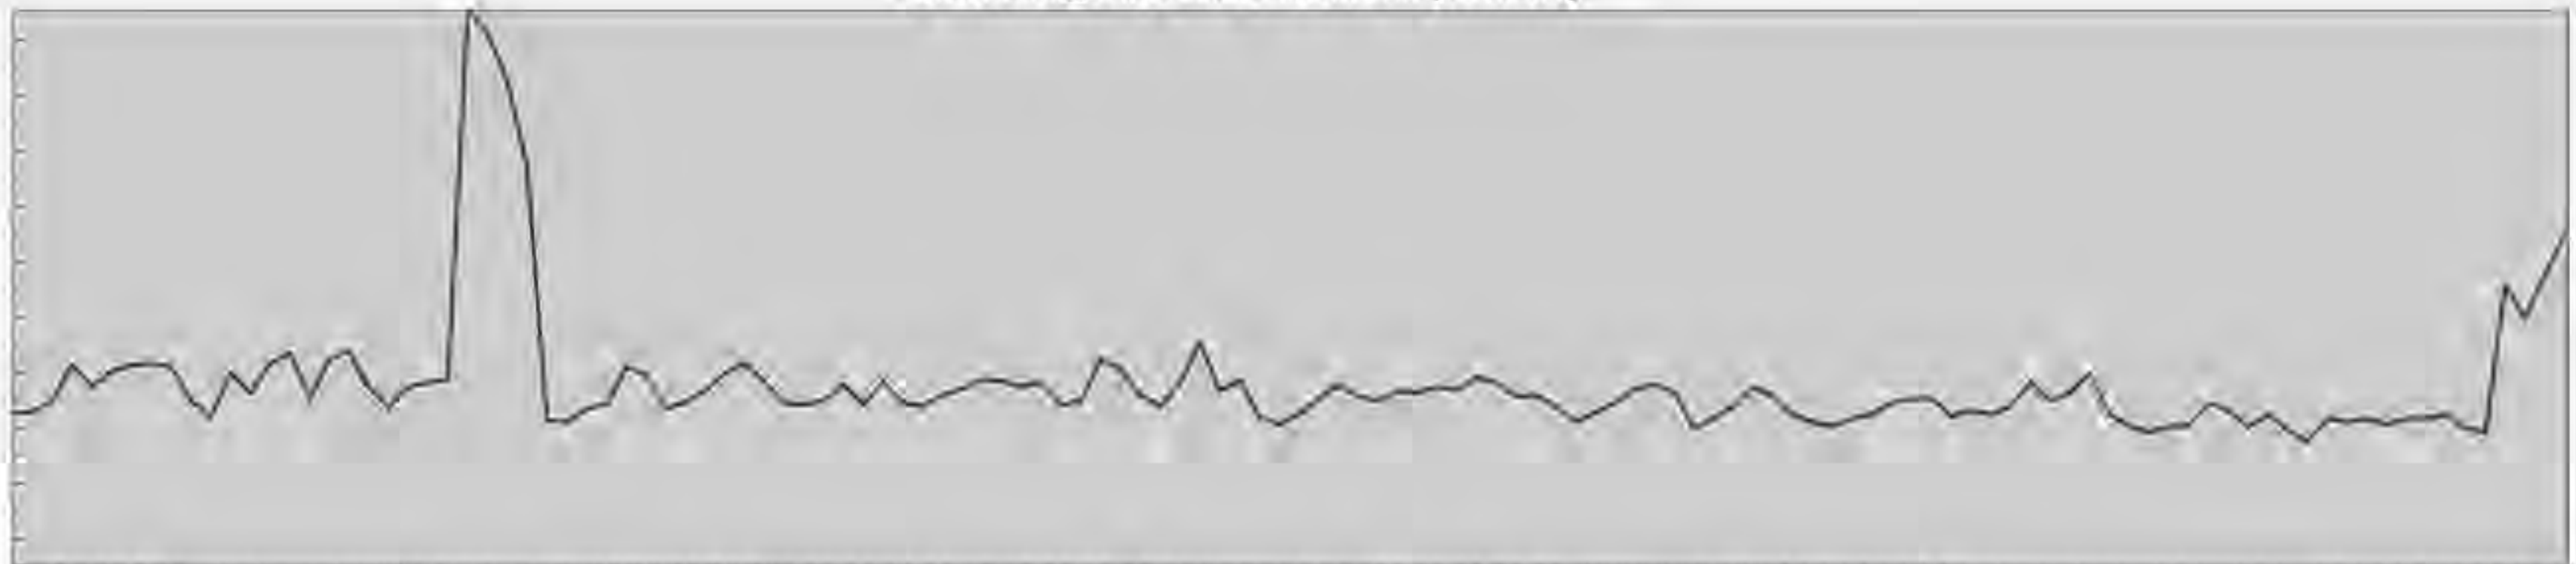

30-NALT GSM289411 CELL  
 128-NALT GSM289410 CELL  
 127-NALT GSM289409 CELL  
 126-Color-d9 GSM1988105 CELL  
 125-Color-d9 GSM1988103 CELL  
 124-Color-d9 GSM1988104 CELL  
 123-Color-d4 GSM1988102 CELL  
 122-Color-d4 GSM1988101 CELL  
 121-Intestine-large GSM258676 CELL  
 120-Intestine-large GSM258675 CELL  
 119-Intestine-small GSM258678 CELL  
 118-Intestine-small GSM258677 CELL  
 117-Lymph-nodes GSM258691 CELL  
 116-Spleen GSM258766 CELL  
 115-Spleen GSM258767 CELL  
 114-Spleen GSM258768 CELL  
 113-Neuro2a GSM241898 CELL  
 112-Neuro2a GSM241899 CELL  
 111-Astrocytes GSM241898 CELL  
 110-mimb GSM258726 CELL  
 109-mimb GSM258725 CELL  
 108-MIMCD3 GSM258724 CELL  
 107-MIMCD3 GSM258723 CELL  
 106-Bruce4 GSM258656 CELL  
 105-Bruce4 GSM258655 CELL  
 104-C2C12 GSM258690 CELL  
 103-C2C12 GSM258689 CELL  
 102-NH3T3 GSM258739 CELL  
 101-NH3T3 GSM258739 CELL  
 100-3T3-L1 GSM258610 CELL  
 99-3T3-L1 GSM258609 CELL  
 98-10T12 GSM258632 CELL  
 97-10T12 GSM258631 CELL  
 96-Osteoblast-d21 GSM258740 CELL  
 95-Osteoblast-d21 GSM258739 CELL  
 94-Osteoblast-d14 GSM258738 CELL  
 93-Osteoblast-d14 GSM258737 CELL  
 92-Osteoblast-d5 GSM258742 CELL  
 91-Osteoblast-d5 GSM258741 CELL  
 90-Chondrocytes GSM266741 CELL  
 89-Chondrocytes GSM266740 CELL  
 88-Nat Helper cell GSM465594 CELL  
 87-Nat Helper cell GSM465593 CELL  
 86-TT cell GSM465596 CELL  
 85-MS-1 GSM234692 CELL  
 84-Lymph-endo-cells GSM143704 CELL  
 83-P-FDC GSM481977 CELL  
 82-P-FDC GSM481978 CELL  
 81-P-FDC GSM481976 CELL  
 80-LY RMLNDCC003001 CELL  
 79-LY RMLNDCC003001 CELL  
 78-Follicular-Bcells GSM258664 CELL  
 77-Follicular-Bcells GSM258663 CELL  
 76-MZ-Bcell GSM258627 CELL  
 75-MZ-Bcell GSM258627 CELL  
 74-BAF3 GSM258620 CELL  
 73-BAF3 GSM258619 CELL  
 72-Tregs GSM258778 CELL  
 71-Tregs GSM258777 CELL  
 70-T-cells-CD8+ GSM258776 CELL  
 69-T-cells-CD8+ GSM258774 CELL  
 68-T-cells-CD4+ GSM258773 CELL  
 67-T-cells-CD4+ GSM258744 CELL  
 66-Thymocyte-DN GSM465595 CELL  
 65-Osteoclasts GSM258743 CELL  
 64-Microglia GSM258721 CELL  
 63-Microglia GSM258721 CELL  
 62-MM-LPS-7h GSM268705 CELL  
 61-MM-LPS-7h GSM268705 CELL  
 60-MM-LPS-6h GSM258702 CELL  
 59-MM-LPS-6h GSM258701 CELL  
 58-MM-LPS-6h GSM258699 CELL  
 57-MM-LPS-6h GSM258699 CELL  
 56-MM-LPS-6h GSM258694 CELL  
 55-MM-LPS-6h GSM258694 CELL  
 54-Ismacryoid-DC GSM258650 CELL  
 53-Ismacryoid-DC GSM258649 CELL  
 52-CD8a-DC GSM258647 CELL  
 51-CD8a-DC GSM258647 CELL  
 50-CD8a+DC GSM258646 CELL  
 49-CD8a+DC GSM258646 CELL  
 48-NK-cells GSM258732 CELL  
 47-NK-cells GSM258731 CELL  
 46-Mast-cells-IgE+Ad GSM258718 CELL  
 45-Mast-cells-IgE+Ad GSM258717 CELL  
 44-Mast-cells-IgE GSM258714 CELL  
 43-Mast-cells-IgE GSM258713 CELL  
 42-Mast-cells GSM258712 CELL  
 41-Mast-cells GSM258712 CELL  
 40-Granulocytes GSM258667 CELL  
 39-Granulocytes GSM258667 CELL  
 38-GMP GSM258666 CELL  
 37-GMP GSM258665 CELL  
 36-GMP GSM258664 CELL  
 35-GMP GSM258642 CELL  
 34-MUEP GSM258720 CELL  
 33-MUEP GSM258719 CELL  
 32-HESC GSM258770 CELL  
 31-HESC GSM258770 CELL  
 30-Bone marrow GSM258628 CELL  
 29-Bone marrow GSM258627 CELL  
 28-Paneth-cells-GE GSM116358 CELL  
 27-Paneth-cells-GE GSM116357 CELL  
 26-Paneth-cells GSM116350 CELL  
 25-Paneth-cells GSM116359 CELL  
 24-Paneth-cells GSM318589 CELL  
 23-Paneth-cells GSM318589 CELL  
 22-Color-Crypt GSM480375 CELL  
 21-Color-Crypt GSM480374 CELL  
 20-Color-Vill GSM480363 CELL  
 19-Color-Vill GSM480362 CELL  
 18-Color-Vill GSM480362 CELL  
 17-Color-IEC-Gf GSM349880 CELL  
 16-Color-IEC-Gf GSM350375 CELL  
 15-Ileum-IEC-Gf GSM350376 CELL  
 14-Ileum-IEC GSM350371 CELL  
 13-Small-intestine-epithelium RMINEP002901 CELL  
 12-Small-intestine-epithelium RMINEP001001 CELL  
 11-FAE-RMPYEP001001 CELL  
 10-FAE-RMPYEP001001 CELL  
 09-Ileum-IEC GSM190797 CELL  
 08-Ileum-IEC GSM190796 CELL  
 07-Ileum-IEC GSM190795 CELL  
 06-CT-w-M-cells GSM190794 CELL  
 05-CT-w-M-cells GSM190793 CELL  
 04-CT-y-M-cells GSM190792 CELL  
 03-PP-M-cells GSM190791 CELL  
 02-PP-M-cells GSM190790 CELL  
 01-PP-M-cells GSM190789 CELL



Cluster0089\_Low in some Paneth cells (22 nodes)

73.7  
69.8  
65.9  
62  
58.2  
54.3  
50.4  
46.5  
42.7  
38.8  
34.9  
31  
27.1  
23.3  
19.4  
15.5  
11.6  
7.8  
3.9  
0

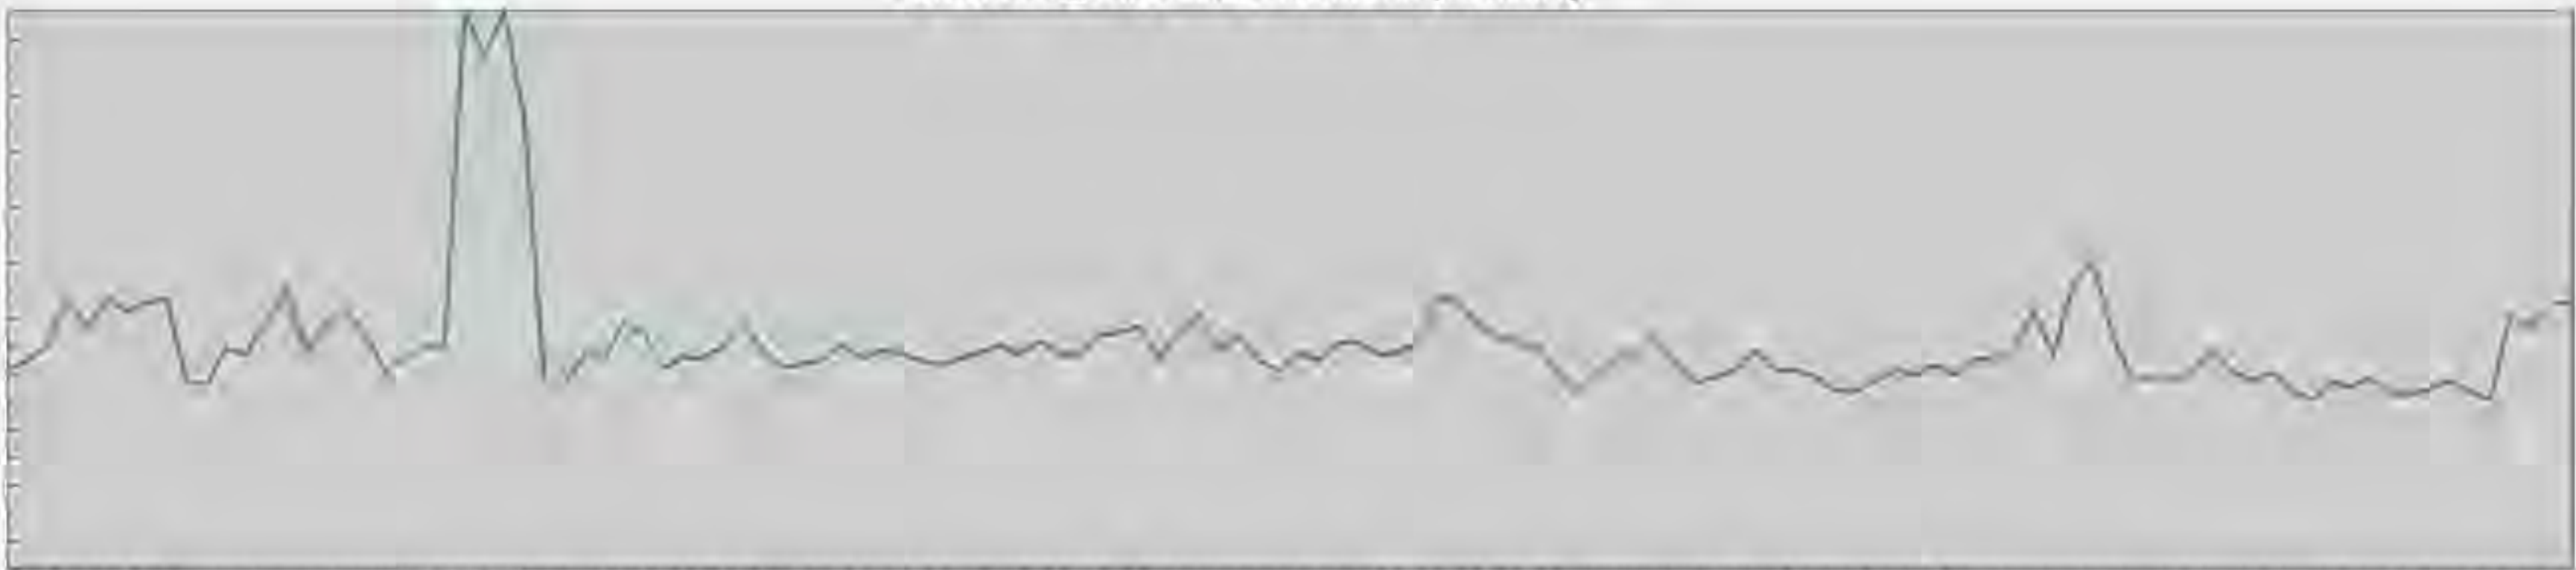

130-NALT GSM289411 CELL  
129-NALT GSM289410 CELL  
128-NALT GSM289409 CELL  
127-NALT GSM289408 CELL  
126-paneth-cells GSM1988105 CELL  
125-paneth-cells GSM1988104 CELL  
124-paneth-cells GSM1988103 CELL  
123-paneth-cells GSM1988102 CELL  
122-paneth-cells GSM318589 CELL  
121-paneth-cells GSM318590 CELL  
120-paneth-cells GSM480375 cel  
119-paneth-cells GSM480374 cel  
118-paneth-cells GSM480363 cel  
117-paneth-cells GSM480362 cel  
116-paneth-cells GSM349880 CELL  
115-paneth-cells GSM116350 CELL  
114-paneth-cells GSM116357 CELL  
113-paneth-cells GSM116359 CELL  
112-paneth-cells GSM318589 CELL  
111-paneth-cells GSM318590 CELL  
110-paneth-cells GSM480375 cel  
109-paneth-cells GSM480374 cel  
108-paneth-cells GSM480363 cel  
107-paneth-cells GSM480362 cel  
106-paneth-cells GSM349880 CELL  
105-paneth-cells GSM116350 CELL  
104-paneth-cells GSM116357 CELL  
103-paneth-cells GSM116359 CELL  
102-paneth-cells GSM318589 CELL  
101-paneth-cells GSM318590 CELL  
100-paneth-cells GSM480375 cel  
99-paneth-cells GSM480374 cel  
98-paneth-cells GSM480363 cel  
97-paneth-cells GSM480362 cel  
96-paneth-cells GSM349880 CELL  
95-paneth-cells GSM116350 CELL  
94-paneth-cells GSM116357 CELL  
93-paneth-cells GSM116359 CELL  
92-paneth-cells GSM318589 CELL  
91-paneth-cells GSM318590 CELL  
90-paneth-cells GSM480375 cel  
89-paneth-cells GSM480374 cel  
88-paneth-cells GSM480363 cel  
87-paneth-cells GSM480362 cel  
86-paneth-cells GSM349880 CELL  
85-paneth-cells GSM116350 CELL  
84-paneth-cells GSM116357 CELL  
83-paneth-cells GSM116359 CELL  
82-paneth-cells GSM318589 CELL  
81-paneth-cells GSM318590 CELL  
80-paneth-cells GSM480375 cel  
79-paneth-cells GSM480374 cel  
78-paneth-cells GSM480363 cel  
77-paneth-cells GSM480362 cel  
76-paneth-cells GSM349880 CELL  
75-paneth-cells GSM116350 CELL  
74-paneth-cells GSM116357 CELL  
73-paneth-cells GSM116359 CELL  
72-paneth-cells GSM318589 CELL  
71-paneth-cells GSM318590 CELL  
70-paneth-cells GSM480375 cel  
69-paneth-cells GSM480374 cel  
68-paneth-cells GSM480363 cel  
67-paneth-cells GSM480362 cel  
66-paneth-cells GSM349880 CELL  
65-paneth-cells GSM116350 CELL  
64-paneth-cells GSM116357 CELL  
63-paneth-cells GSM116359 CELL  
62-paneth-cells GSM318589 CELL  
61-paneth-cells GSM318590 CELL  
60-paneth-cells GSM480375 cel  
59-paneth-cells GSM480374 cel  
58-paneth-cells GSM480363 cel  
57-paneth-cells GSM480362 cel  
56-paneth-cells GSM349880 CELL  
55-paneth-cells GSM116350 CELL  
54-paneth-cells GSM116357 CELL  
53-paneth-cells GSM116359 CELL  
52-paneth-cells GSM318589 CELL  
51-paneth-cells GSM318590 CELL  
50-paneth-cells GSM480375 cel  
49-paneth-cells GSM480374 cel  
48-paneth-cells GSM480363 cel  
47-paneth-cells GSM480362 cel  
46-paneth-cells GSM349880 CELL  
45-paneth-cells GSM116350 CELL  
44-paneth-cells GSM116357 CELL  
43-paneth-cells GSM116359 CELL  
42-paneth-cells GSM318589 CELL  
41-paneth-cells GSM318590 CELL  
40-paneth-cells GSM480375 cel  
39-paneth-cells GSM480374 cel  
38-paneth-cells GSM480363 cel  
37-paneth-cells GSM480362 cel  
36-paneth-cells GSM349880 CELL  
35-paneth-cells GSM116350 CELL  
34-paneth-cells GSM116357 CELL  
33-paneth-cells GSM116359 CELL  
32-paneth-cells GSM318589 CELL  
31-paneth-cells GSM318590 CELL  
30-paneth-cells GSM480375 cel  
29-paneth-cells GSM480374 cel  
28-paneth-cells GSM480363 cel  
27-paneth-cells GSM480362 cel  
26-paneth-cells GSM349880 CELL  
25-paneth-cells GSM116350 CELL  
24-paneth-cells GSM116357 CELL  
23-paneth-cells GSM116359 CELL  
22-paneth-cells GSM318589 CELL  
21-paneth-cells GSM318590 CELL  
20-paneth-cells GSM480375 cel  
19-paneth-cells GSM480374 cel  
18-paneth-cells GSM480363 cel  
17-paneth-cells GSM480362 cel  
16-paneth-cells GSM349880 CELL  
15-paneth-cells GSM116350 CELL  
14-paneth-cells GSM116357 CELL  
13-paneth-cells GSM116359 CELL  
12-paneth-cells GSM318589 CELL  
11-paneth-cells GSM318590 CELL  
10-paneth-cells GSM480375 cel  
09-paneth-cells GSM480374 cel  
08-paneth-cells GSM480363 cel  
07-paneth-cells GSM480362 cel  
06-paneth-cells GSM349880 CELL  
05-paneth-cells GSM116350 CELL  
04-paneth-cells GSM116357 CELL  
03-paneth-cells GSM116359 CELL  
02-paneth-cells GSM318589 CELL  
01-paneth-cells GSM318590 CELL



Cluster0090\_Low in some Paneth cells (22 nodes)

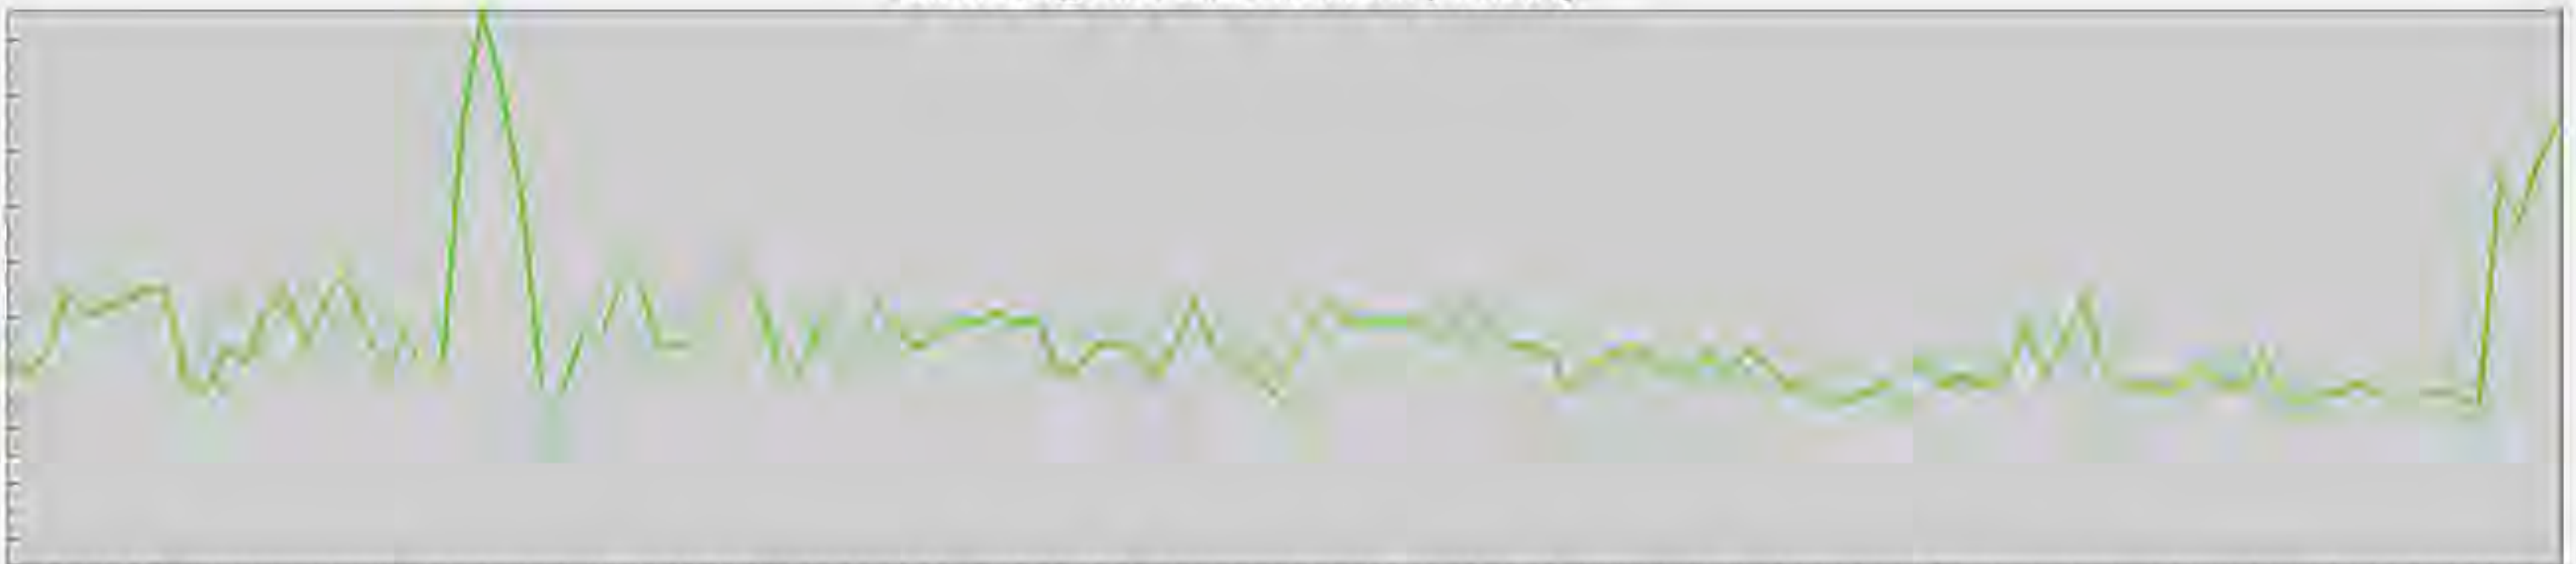

01-PP-M-cells\_GSM190789.CEL  
 02-PP-M-cells\_GSM190790.CEL  
 03-PP-M-cells\_GSM190791.CEL  
 04-CT-v-M-cells\_GSM190792.CEL  
 05-CT-v-M-cells\_GSM190793.CEL  
 06-CT-v-M-cells\_GSM190794.CEL  
 07-Ileum-IEC\_GSM190795.CEL  
 08-Ileum-IEC\_GSM190796.CEL  
 09-Ileum-IEC\_GSM190797.CEL  
 10-FAE-RMPYEP001001.CEL  
 11-FAE-RMPYEP002001.CEL  
 12-Small-intestine-epithelium\_RMINEP001001.CEL  
 13-Small-intestine-epithelium\_RMINEP002001.CEL  
 14-Ileum-IEC\_GSM350371.CEL  
 15-Ileum-IEC\_GSM350375.CEL  
 16-Colon-IEC-GF\_GSM349880.CEL  
 17-Colon-IEC-GF\_GSM350375.CEL  
 18-Colon-Vill\_GSM480362.CEL  
 19-Colon-Vill\_GSM480363.CEL  
 20-Colon-Crypt\_GSM480374.CEL  
 21-Colon-Crypt\_GSM480375.CEL  
 22-Paneth-cells\_GSM318589.CEL  
 23-Paneth-cells\_GSM318590.CEL  
 24-Paneth-cells\_GSM116359.CEL  
 25-Paneth-cells-GF-1\_GSM116357.CEL  
 26-Paneth-cells-GF-1\_GSM116357.CEL  
 27-Paneth-cells-GF-1\_GSM116357.CEL  
 28-Bone marrow\_GSM258627.CEL  
 29-Bone marrow\_GSM258627.CEL  
 30-HSC\_GSM258770.CEL  
 31-HSC\_GSM258770.CEL  
 32-MEP\_GSM258770.CEL  
 33-MEP\_GSM258770.CEL  
 34-MEP\_GSM258770.CEL  
 35-GMP\_GSM258665.CEL  
 36-GMP\_GSM258665.CEL  
 37-GMP\_GSM258665.CEL  
 38-Granulocytes\_GSM258667.CEL  
 39-Granulocytes\_GSM258667.CEL  
 40-Mast-cells\_GSM258711.CEL  
 41-Mast-cells\_GSM258711.CEL  
 42-Mast-cells-IgE\_GSM258713.CEL  
 43-Mast-cells-IgE\_GSM258714.CEL  
 44-Mast-cells-IgE+Ad\_GSM258718.CEL  
 45-Mast-cells-IgE+Ad\_GSM258718.CEL  
 46-NK-cells\_GSM258731.CEL  
 47-NK-cells\_GSM258731.CEL  
 48-CD8a+DC\_GSM258645.CEL  
 49-CD8a+DC\_GSM258645.CEL  
 50-CD8a-DC\_GSM258647.CEL  
 51-CD8a-DC\_GSM258647.CEL  
 52-Plasmacytoid-DC\_GSM258650.CEL  
 53-Plasmacytoid-DC\_GSM258650.CEL  
 54-BMM-GSM258694.CEL  
 55-BMM-GSM258694.CEL  
 56-BMM-LPS-6h\_GSM258699.CEL  
 57-BMM-LPS-6h\_GSM258699.CEL  
 58-PMM-GSM258702.CEL  
 59-PMM-GSM258702.CEL  
 60-PMM-LPS-7h\_GSM258705.CEL  
 61-PMM-LPS-7h\_GSM258705.CEL  
 62-Microglia\_GSM258721.CEL  
 63-Microglia\_GSM258721.CEL  
 64-Osteoclasts\_GSM258743.CEL  
 65-Osteoclasts\_GSM258744.CEL  
 66-Thymocyte-DN\_GSM465595.CEL  
 67-T-cells-CD4+\_GSM258773.CEL  
 68-T-cells-CD4+\_GSM258773.CEL  
 69-T-cells-CD8+\_GSM258774.CEL  
 70-T-cells-CD8+\_GSM258774.CEL  
 71-Tregs\_GSM258778.CEL  
 72-Tregs\_GSM258778.CEL  
 73-BAF3\_GSM258619.CEL  
 74-BAF3\_GSM258620.CEL  
 75-MZ-Bcell\_GSM258621.CEL  
 76-MZ-Bcell\_GSM258621.CEL  
 77-Follicular-Bcells\_GSM258664.CEL  
 78-Follicular-Bcells\_GSM258664.CEL  
 79-FLY-RMLNDC002001.CEL  
 80-FLY-RMLNDC003001.CEL  
 81-PP-FDC\_GSM481978.CEL  
 82-PP-FDC\_GSM481978.CEL  
 83-PP-FDC\_GSM481978.CEL  
 84-Lymph-endo-cells\_GSM143704.CEL  
 85-MS-1\_GSM234692.CEL  
 86-LTcell\_GSM465596.CEL  
 87-Nat Helper cell\_GSM465593.CEL  
 88-Nat Helper cell\_GSM465594.CEL  
 89-Chondrocytes\_GSM266740.CEL  
 90-Chondrocytes\_GSM266741.CEL  
 91-Osteoblast-d5\_GSM258741.CEL  
 92-Osteoblast-d5\_GSM258742.CEL  
 93-Osteoblast-d14\_GSM258737.CEL  
 94-Osteoblast-d14\_GSM258738.CEL  
 95-Osteoblast-d21\_GSM258739.CEL  
 96-Osteoblast-d21\_GSM258739.CEL  
 97-10T12\_GSM258631.CEL  
 98-10T12\_GSM258631.CEL  
 99-3T3-L1\_GSM258610.CEL  
 100-3T3-L1\_GSM258610.CEL  
 101-NH3T3\_GSM258729.CEL  
 102-NH3T3\_GSM258729.CEL  
 103-C2C12\_GSM258629.CEL  
 104-C2C12\_GSM258630.CEL  
 105-Bruce4\_GSM258656.CEL  
 106-Bruce4\_GSM258656.CEL  
 107-MIMCD3\_GSM258723.CEL  
 108-MIMCD3\_GSM258723.CEL  
 109-mim6\_GSM258725.CEL  
 110-mim6\_GSM258725.CEL  
 111-Astrocytes\_GSM241898.CEL  
 112-Astrocytes\_GSM241898.CEL  
 113-Spleen\_GSM258767.CEL  
 114-Spleen\_GSM258767.CEL  
 115-Lymph-nodes\_GSM258691.CEL  
 116-Lymph-nodes\_GSM258691.CEL  
 117-Lymph-nodes\_GSM258691.CEL  
 118-Intestine-small\_GSM258677.CEL  
 119-Intestine-small\_GSM258677.CEL  
 120-Intestine-large\_GSM258678.CEL  
 121-Intestine-large\_GSM258678.CEL  
 122-Colon-d4\_GSM198101.CEL  
 123-Colon-d4\_GSM198101.CEL  
 124-Colon-d9\_GSM198103.CEL  
 125-Colon-d9\_GSM198103.CEL  
 126-Colon-d9\_GSM198104.CEL  
 127-NALT\_GSM289408.CEL  
 128-NALT\_GSM289409.CEL  
 129-NALT\_GSM289410.CEL  
 130-NALT\_GSM289411.CEL



Cluster0091\_House keeping (22 nodes)

1,028.9  
974.8  
920.6  
866.5  
812.3  
758.2  
704  
649.8  
595.7  
541.5  
487.4  
433.2  
379.1  
324.9  
270.8  
216.6  
162.5  
108.3  
54.2  
0

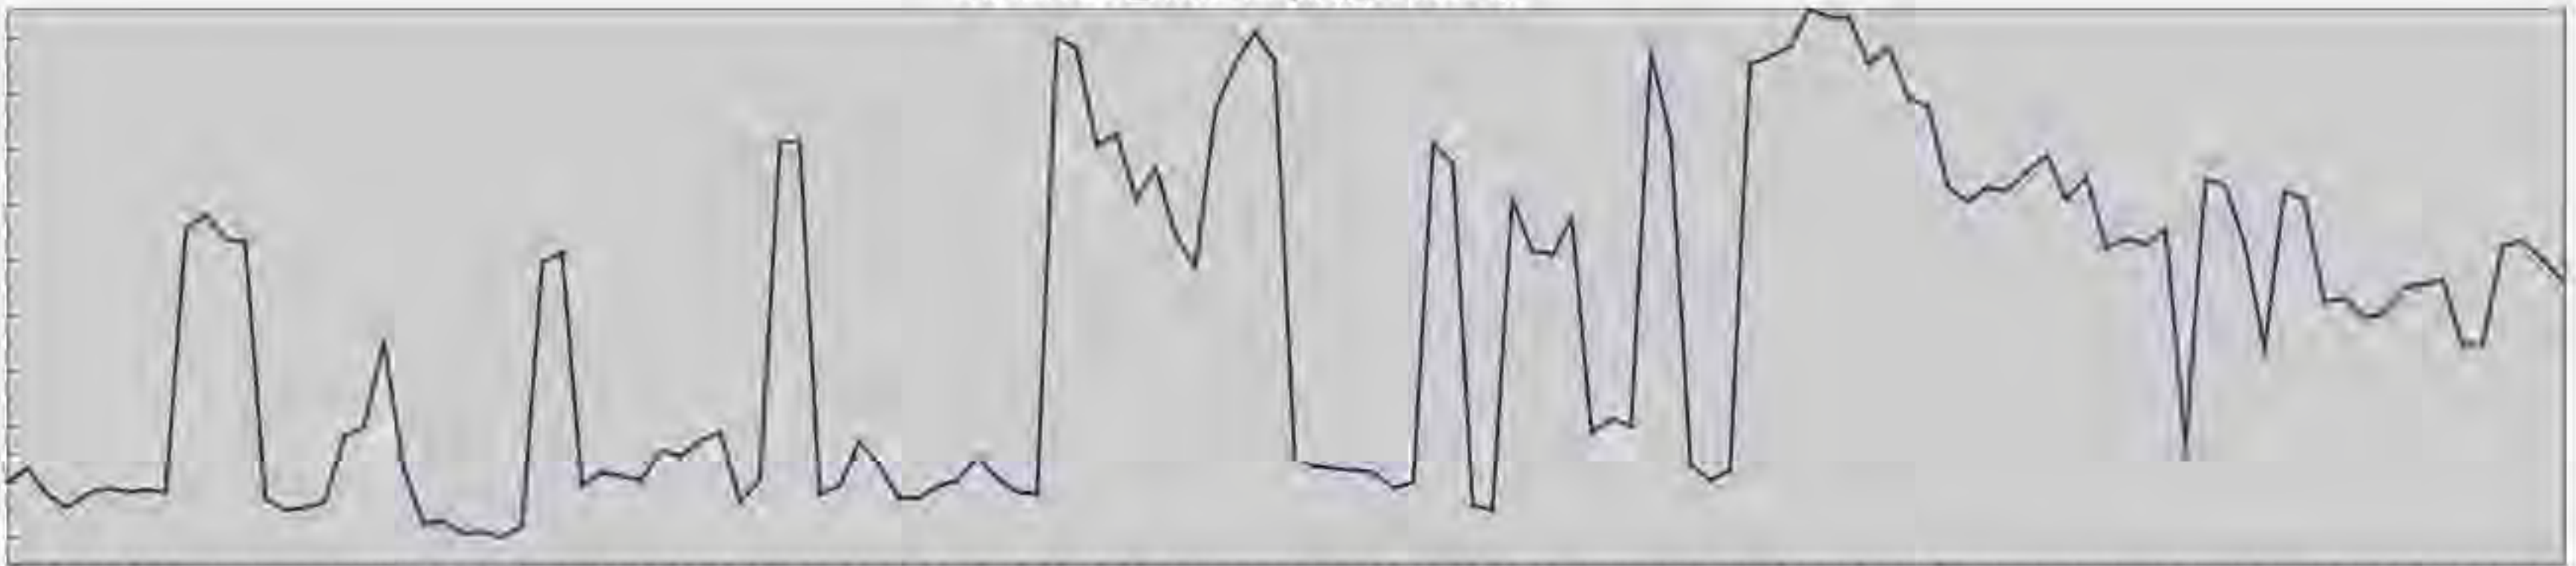

130-NALT GSM289411.CEL  
129-NALT GSM289410.CEL  
128-NALT GSM289409.CEL  
127-NALT GSM289408.CEL  
126-Colon-d9 GSM1988104.CEL  
125-Colon-d9 GSM1988103.CEL  
124-Colon-d9 GSM1988102.CEL  
123-Colon-d4 GSM1988101.CEL  
122-Colon-d4 GSM1988100.CEL  
121-Intestine-large GSM258676.CEL  
120-Intestine-large GSM258675.CEL  
119-Intestine-small GSM258678.CEL  
118-Intestine-small GSM258679.CEL  
117-Lymph-nodes GSM258691.CEL  
116-Lymph-nodes GSM258692.CEL  
115-Spleen GSM258767.CEL  
114-Spleen GSM258768.CEL  
113-Neuro2a GSM258727.CEL  
112-Neuro2a GSM241898.CEL  
111-Astrocytes GSM241899.CEL  
110-ming GSM258726.CEL  
109-ming GSM258725.CEL  
108-MIMCD3 GSM258724.CEL  
107-MIMCD3 GSM258723.CEL  
106-Bruce4 GSM258656.CEL  
105-Bruce4 GSM258655.CEL  
104-C2C12 GSM258690.CEL  
103-C2C12 GSM258689.CEL  
102-NH3T3 GSM258730.CEL  
101-NH3T3 GSM258729.CEL  
100-3T3-L1 GSM258610.CEL  
99-3T3-L1 GSM258609.CEL  
98-10T12 GSM258632.CEL  
97-10T12 GSM258631.CEL  
96-Osteoblast-d21 GSM258740.CEL  
95-Osteoblast-d21 GSM258739.CEL  
94-Osteoblast-d14 GSM258738.CEL  
93-Osteoblast-d14 GSM258737.CEL  
92-Osteoblast-d5 GSM258742.CEL  
91-Osteoblast-d5 GSM258741.CEL  
90-Chondrocytes GSM266741.CEL  
89-Chondrocytes GSM266740.CEL  
88-Nat Helper cell GSM465594.CEL  
87-Nat Helper cell GSM465593.CEL  
86-LT cell GSM465596.CEL  
85-MS-1 GSM234692.CEL  
84-Lymph-endg-cells GSM143704.CEL  
83-PP-FDC GSM481977.CEL  
82-PP-FDC GSM481978.CEL  
81-PP-FDC GSM481976.CEL  
80-LY-RMLND C003001.CEL  
79-LY-RMLND C003001.CEL  
78-Follicular-Bcells GSM258664.CEL  
77-Follicular-Bcells GSM258663.CEL  
76-MZ-Bcell GSM258627.CEL  
75-MZ-Bcell GSM258621.CEL  
74-BAF3 GSM258620.CEL  
73-BAF3 GSM258619.CEL  
72-Tregs GSM258778.CEL  
71-Tregs GSM258777.CEL  
70-T-cells-CD8+ GSM258776.CEL  
69-T-cells-CD8+ GSM258775.CEL  
68-T-cells-CD4+ GSM258774.CEL  
67-T-cells-CD4+ GSM258773.CEL  
66-Thymocyte-DN GSM465595.CEL  
65-Osteoclasts GSM258744.CEL  
64-Microglia GSM258721.CEL  
63-Microglia GSM258721.CEL  
62-MM-LPS-7h GSM258706.CEL  
61-MM-LPS-7h GSM258705.CEL  
60-MM-LPS-6h GSM258702.CEL  
59-MM-LPS-6h GSM258701.CEL  
58-MM-LPS-6h GSM258699.CEL  
57-MM-LPS-6h GSM258699.CEL  
56-MM-LPS-6h GSM258694.CEL  
55-MM-LPS-6h GSM258694.CEL  
54-Plasmacytoid-DC GSM258650.CEL  
53-Plasmacytoid-DC GSM258649.CEL  
52-CD8a-DC GSM258647.CEL  
51-CD8a-DC GSM258647.CEL  
50-CD8a+DC GSM258646.CEL  
49-CD8a+DC GSM258646.CEL  
48-NK-cells GSM258732.CEL  
47-NK-cells GSM258731.CEL  
46-NK-cells GSM258731.CEL  
45-Mast-cells-IgE+Ad GSM258718.CEL  
44-Mast-cells-IgE+Ad GSM258717.CEL  
43-Mast-cells-IgE GSM258714.CEL  
42-Mast-cells-IgE GSM258713.CEL  
41-Mast-cells GSM258712.CEL  
40-Granulocytes GSM258667.CEL  
39-Granulocytes GSM258667.CEL  
38-GMP GSM258666.CEL  
37-GMP GSM258666.CEL  
36-GMP GSM258665.CEL  
35-GMP GSM258642.CEL  
34-GMP GSM258642.CEL  
33-MEP GSM258720.CEL  
32-MEP GSM258719.CEL  
31-HESC GSM258770.CEL  
30-HESC GSM258769.CEL  
29-Bone marrow GSM258628.CEL  
28-Bone marrow GSM258627.CEL  
27-paneth-cells-GE GSM116358.CEL  
26-paneth-cells-GE GSM116357.CEL  
25-paneth-cells GSM116350.CEL  
24-paneth-cells GSM116359.CEL  
23-paneth-cells GSM318589.CEL  
22-paneth-cells GSM318590.CEL  
21-Colon-Crypt GSM480375.CEL  
20-Colon-Crypt GSM480374.CEL  
19-Colon-Vill GSM480363.CEL  
18-Colon-Vill GSM480362.CEL  
17-Colon-IEC-GE GSM349880.CEL  
16-Colon-IEC-GE GSM350375.CEL  
15-Ileum-IEC GSM350376.CEL  
14-Ileum-IEC GSM350371.CEL  
13-Small-intestine-epithelium RMINEP002001.CEL  
12-Small-intestine-epithelium RMINEP001001.CEL  
11-FAE-RMPYEP002001.CEL  
10-FAE-RMPYEP001001.CEL  
09-Ileum-IEC GSM190797.CEL  
08-Ileum-IEC GSM190796.CEL  
07-Ileum-IEC GSM190795.CEL  
06-CT-v-M-cells GSM190794.CEL  
05-CT-v-M-cells GSM190793.CEL  
04-CT-v-M-cells GSM190792.CEL  
03-PP-M-cells GSM190791.CEL  
02-PP-M-cells GSM190790.CEL  
01-PP-M-cells GSM190789.CEL



Cluster0092\_Mesenchyme-related (22 nodes)

1,924.8  
1,823.5  
1,722.2  
1,620.9  
1,519.6  
1,418.3  
1,316.9  
1,215.6  
1,114.3  
1,013  
911.7  
810.4  
709.1  
607.8  
506.5  
405.2  
303.9  
202.6  
101.3  
0

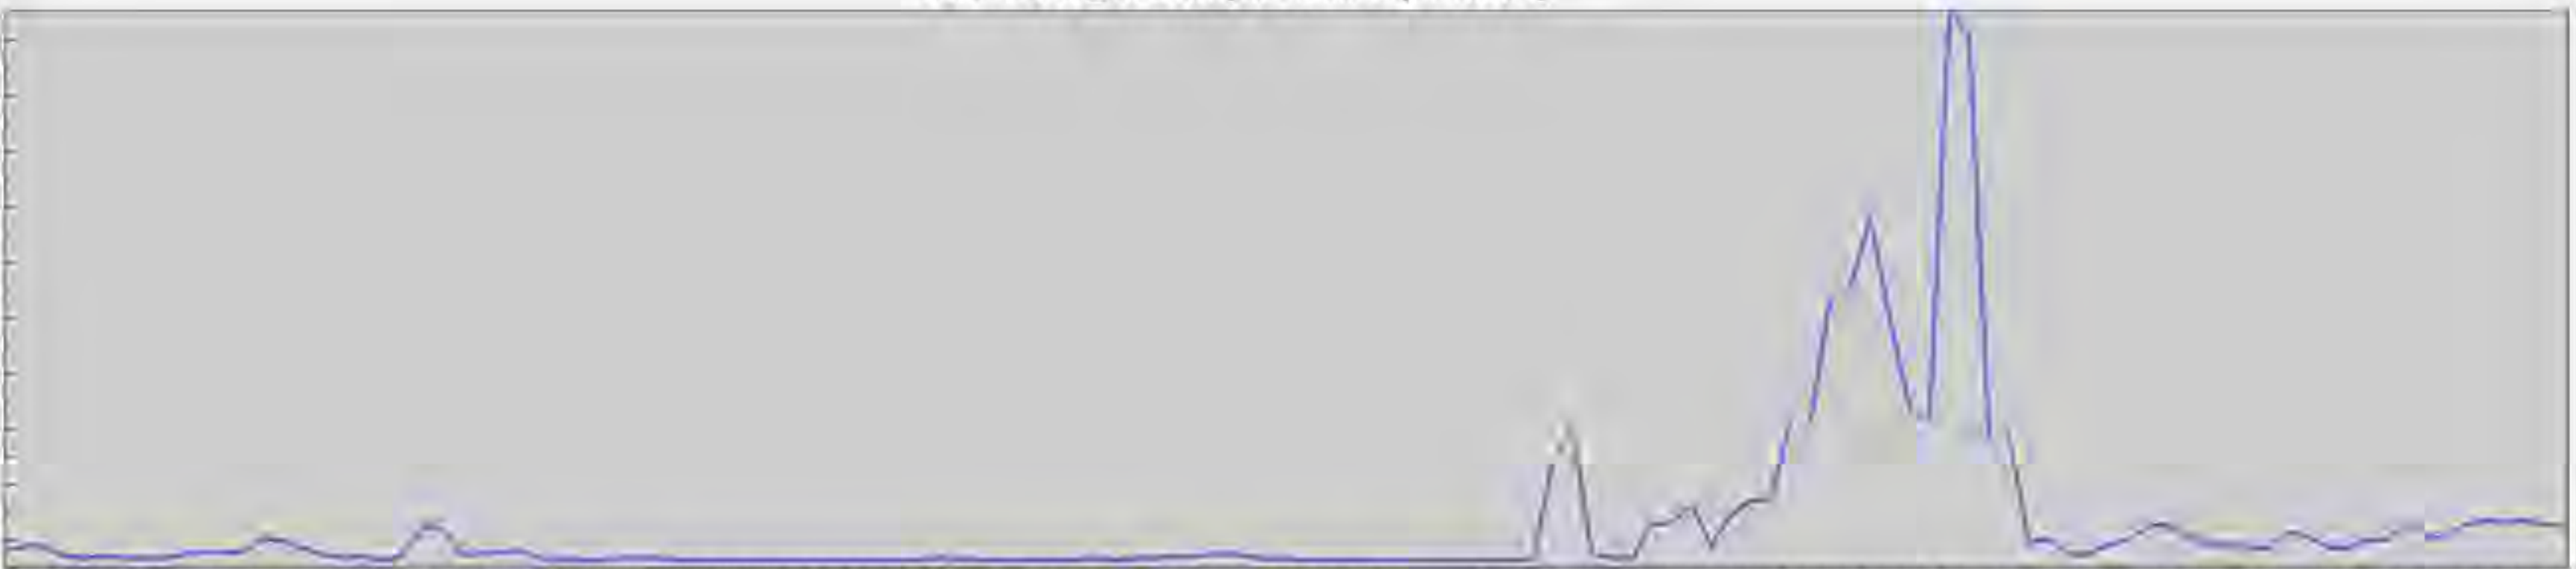

01-PP-M-cells\_GSM190789.CEL  
 02-PP-M-cells\_GSM190790.CEL  
 03-PP-M-cells\_GSM190791.CEL  
 04-CT-V-M-cells\_GSM190792.CEL  
 05-CT-V-M-cells\_GSM190793.CEL  
 06-CT-V-M-cells\_GSM190794.CEL  
 07-Ileum-IEC\_GSM190795.CEL  
 08-Ileum-IEC\_GSM190796.CEL  
 09-Ileum-IEC\_GSM190797.CEL  
 10-FAE-RMPYEP001001.CEL  
 11-FAE-RMPYEP002001.CEL  
 12-Small-intestine-epithelium\_RMINEP001001.CEL  
 13-Small-intestine-epithelium\_RMINEP002001.CEL  
 14-Ileum-IEC\_GSM350371.CEL  
 15-Ileum-IEC\_GSM350375.CEL  
 16-Colon-IEC-Gf\_GSM349880.CEL  
 17-Colon-IEC-Gf\_GSM350375.CEL  
 18-Colon-Vill-GSM480362.CEL  
 19-Colon-Vill-GSM480363.CEL  
 20-Colon-Crypt\_GSM480374.CEL  
 21-Colon-Crypt\_GSM480375.CEL  
 22-Paneth-cells\_GSM318590.CEL  
 23-Paneth-cells\_GSM318589.CEL  
 24-Paneth-cells\_GSM116359.CEL  
 25-Paneth-cells\_GSM116359.CEL  
 26-Paneth-cells-Gf-1-GSM116357.CEL  
 27-Paneth-cells-Gf-1-GSM116357.CEL  
 28-Paneth-cells-Gf-1-GSM116357.CEL  
 29-Bone marrow\_GSM258627.CEL  
 30-HSC\_GSM258770.CEL  
 31-MEP\_GSM258770.CEL  
 32-MEP\_GSM258770.CEL  
 33-MEP\_GSM258770.CEL  
 34-MEP\_GSM258770.CEL  
 35-MEP\_GSM258770.CEL  
 36-MEP\_GSM258770.CEL  
 37-MEP\_GSM258770.CEL  
 38-MEP\_GSM258770.CEL  
 39-Granulocytes\_GSM258667.CEL  
 40-Mast-cells\_GSM258771.CEL  
 41-Mast-cells\_GSM258771.CEL  
 42-Mast-cells-Gf-GSM258771.CEL  
 43-Mast-cells-Gf-GSM258771.CEL  
 44-Mast-cells-Gf-GSM258771.CEL  
 45-Mast-cells-Gf-GSM258771.CEL  
 46-NK-cells\_GSM258732.CEL  
 47-NK-cells\_GSM258732.CEL  
 48-CD8a+DC\_GSM258646.CEL  
 49-CD8a+DC\_GSM258646.CEL  
 50-CD8a+DC\_GSM258647.CEL  
 51-CD8a+DC\_GSM258647.CEL  
 52-CD8a+DC\_GSM258647.CEL  
 53-CD8a+DC\_GSM258647.CEL  
 54-CD8a+DC\_GSM258647.CEL  
 55-CD8a+DC\_GSM258647.CEL  
 56-CD8a+DC\_GSM258647.CEL  
 57-CD8a+DC\_GSM258647.CEL  
 58-CD8a+DC\_GSM258647.CEL  
 59-CD8a+DC\_GSM258647.CEL  
 60-CD8a+DC\_GSM258647.CEL  
 61-CD8a+DC\_GSM258647.CEL  
 62-Microglia\_GSM258721.CEL  
 63-Microglia\_GSM258721.CEL  
 64-Osteoclasts\_GSM258743.CEL  
 65-Osteoclasts\_GSM258743.CEL  
 66-Thymocyte-DN\_GSM465595.CEL  
 67-T-cells-CD4+\_GSM258773.CEL  
 68-T-cells-CD4+\_GSM258773.CEL  
 69-T-cells-CD8+\_GSM258775.CEL  
 70-T-cells-CD8+\_GSM258775.CEL  
 71-Tregs\_GSM258778.CEL  
 72-Tregs\_GSM258778.CEL  
 73-Tregs\_GSM258778.CEL  
 74-BAF3\_GSM258620.CEL  
 75-MZ-Bcell\_GSM258622.CEL  
 76-MZ-Bcell\_GSM258622.CEL  
 77-Follicular-Bcells\_GSM258653.CEL  
 78-Follicular-Bcells\_GSM258653.CEL  
 79-Follicular-Bcells\_GSM258653.CEL  
 80-LY-RMLNDC002001.CEL  
 81-LY-RMLNDC003001.CEL  
 82-LY-RMLNDC003001.CEL  
 83-LY-RMLNDC003001.CEL  
 84-LY-RMLNDC003001.CEL  
 85-LY-RMLNDC003001.CEL  
 86-LY-RMLNDC003001.CEL  
 87-Nat Helper cell\_GSM465593.CEL  
 88-Nat Helper cell\_GSM465593.CEL  
 89-Nat Helper cell\_GSM465593.CEL  
 90-Chondrocytes\_GSM258741.CEL  
 91-Chondrocytes\_GSM258741.CEL  
 92-Osteoblast-d5\_GSM258742.CEL  
 93-Osteoblast-d5\_GSM258742.CEL  
 94-Osteoblast-d14\_GSM258737.CEL  
 95-Osteoblast-d21\_GSM258738.CEL  
 96-Osteoblast-d21\_GSM258738.CEL  
 97-Osteoblast-d21\_GSM258631.CEL  
 98-Osteoblast-d21\_GSM258631.CEL  
 99-Osteoblast-d21\_GSM258631.CEL  
 100-3T3-L1\_GSM258610.CEL  
 101-3T3-L1\_GSM258610.CEL  
 102-NH3T3\_GSM258739.CEL  
 103-NH3T3\_GSM258739.CEL  
 104-C2C12\_GSM258629.CEL  
 105-C2C12\_GSM258629.CEL  
 106-Bruce4\_GSM258656.CEL  
 107-MIMCD3\_GSM258723.CEL  
 108-MIMCD3\_GSM258723.CEL  
 109-mim6\_GSM258725.CEL  
 110-mim6\_GSM258725.CEL  
 111-Astrocytes\_GSM241898.CEL  
 112-Astrocytes\_GSM241898.CEL  
 113-Spleen\_GSM258767.CEL  
 114-Spleen\_GSM258767.CEL  
 115-Spleen\_GSM258767.CEL  
 116-Lymph-nodes\_GSM258691.CEL  
 117-Lymph-nodes\_GSM258691.CEL  
 118-Intestine-small\_GSM258692.CEL  
 119-Intestine-small\_GSM258692.CEL  
 120-Intestine-large\_GSM258675.CEL  
 121-Intestine-large\_GSM258675.CEL  
 122-Intestine-large\_GSM258675.CEL  
 123-Colon-d4\_GSM198810.CEL  
 124-Colon-d4\_GSM198810.CEL  
 125-Colon-d9\_GSM198810.CEL  
 126-Colon-d9\_GSM198810.CEL  
 127-NALT\_GSM289408.CEL  
 128-NALT\_GSM289409.CEL  
 129-NALT\_GSM289410.CEL  
 130-NALT\_GSM289411.CEL



Cluster0093\_Uncertain (22 nodes)

82  
77.7  
73.4  
69.1  
64.8  
60.4  
56.1  
51.8  
47.5  
43.2  
38.9  
34.5  
30.2  
25.9  
21.6  
17.3  
13  
8.6  
4.3  
0

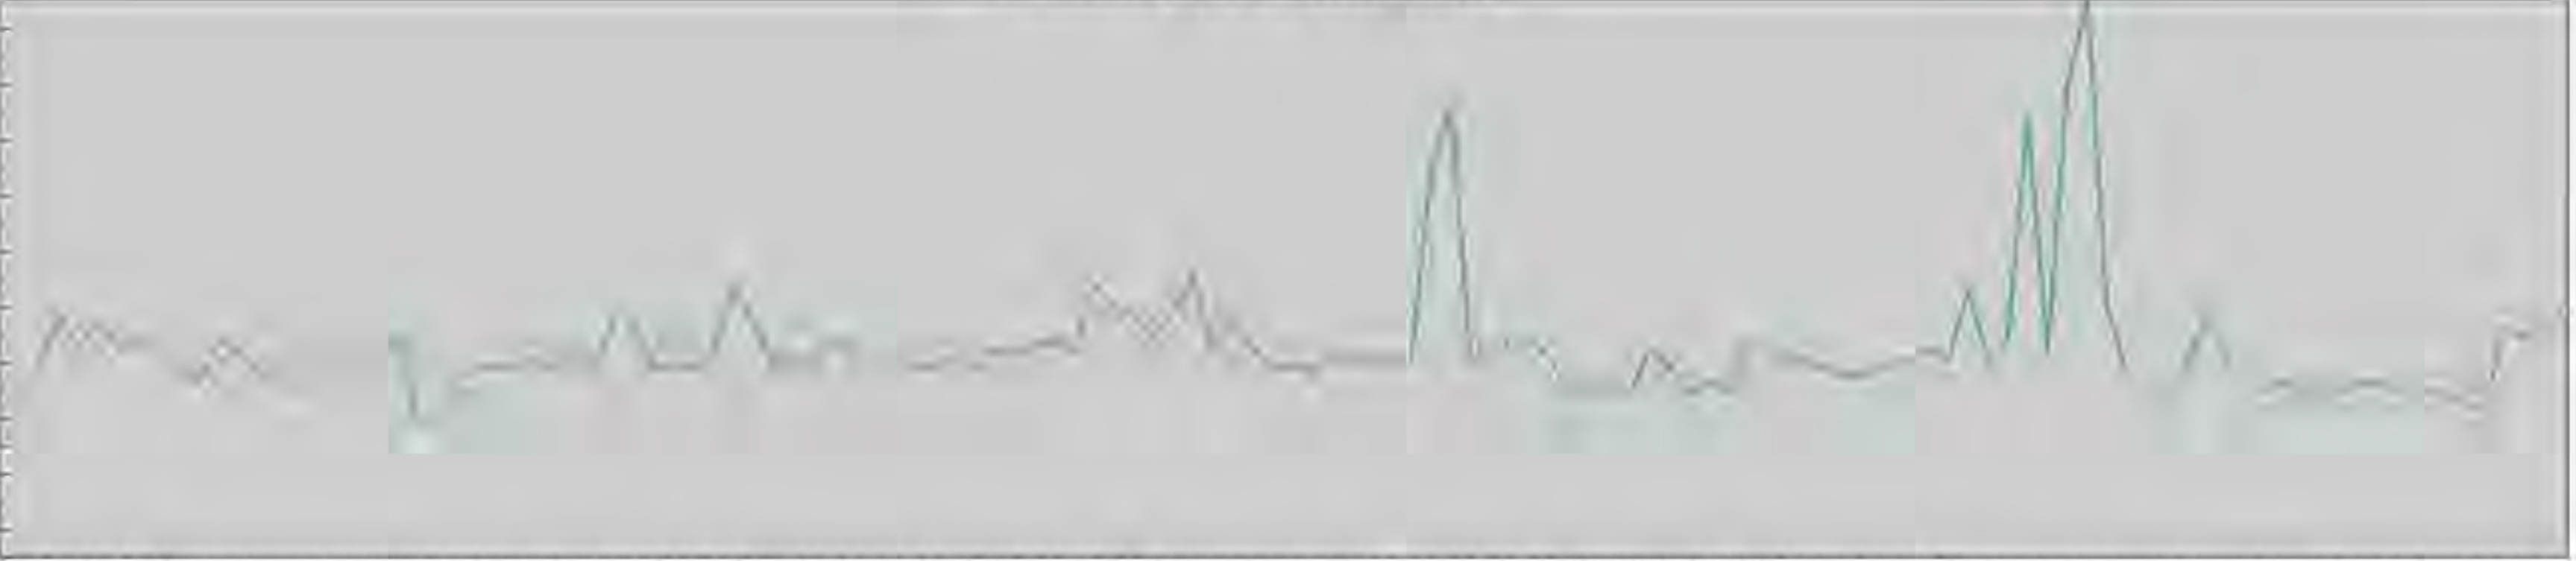

130- NALT GSM289411 CELL  
 129- NALT GSM289410 CELL  
 128- NALT GSM289409 CELL  
 127- NALT GSM289408 CELL  
 126- Colon-d9 GSM1988105 CELL  
 125- Colon-d9 GSM1988104 CELL  
 124- Colon-d9 GSM1988103 CELL  
 123- Colon-d4 GSM1988102 CELL  
 122- Colon-d4 GSM1988101 CELL  
 121- Intestine-large GSM258676 CELL  
 120- Intestine-large GSM258675 CELL  
 119- Intestine-small GSM258678 CELL  
 118- Intestine-small GSM258692 CELL  
 117- Lymph-nodes GSM258691 CELL  
 116- Lymph-nodes GSM258726 CELL  
 115- Spleen GSM258767 CELL  
 114- Spleen GSM258768 CELL  
 113- Neuro2a GSM258728 CELL  
 112- Neuro2a GSM258727 CELL  
 111- Astrocytes GSM241898 CELL  
 110- mimb GSM258726 CELL  
 109- mimb GSM258725 CELL  
 108- MIMCD3 GSM258724 CELL  
 107- MIMCD3 GSM258723 CELL  
 106- Bruce4 GSM258656 CELL  
 105- Bruce4 GSM258655 CELL  
 104- C2C12 GSM258690 CELL  
 103- C2C12 GSM258689 CELL  
 102- NIH3T3 GSM258739 CELL  
 101- NIH3T3 GSM258738 CELL  
 100- 3T3-L1 GSM258610 CELL  
 99- 3T3-L1 GSM258609 CELL  
 98- 10T12 GSM258632 CELL  
 97- 10T12 GSM258631 CELL  
 96- Osteoblast-d21 GSM258740 CELL  
 95- Osteoblast-d21 GSM258739 CELL  
 94- Osteoblast-d14 GSM258738 CELL  
 93- Osteoblast-d14 GSM258737 CELL  
 92- Osteoblast-d5 GSM258742 CELL  
 91- Osteoblast-d5 GSM258741 CELL  
 90- Chondrocytes GSM266741 CELL  
 89- Nat Helper cell GSM465594 CELL  
 88- Nat Helper cell GSM465593 CELL  
 87- T cell GSM465596 CELL  
 86- T cell GSM465595 CELL  
 85- MS-1 GSM234692 CELL  
 84- Lymph-endo-cells GSM143704 CELL  
 83- PP-FDC GSM481977 CELL  
 82- PP-FDC GSM481978 CELL  
 81- PP-FDC GSM481976 CELL  
 80- FLY RMLNDC002001 CELL  
 79- FLY RMLNDC002001 CELL  
 78- Follicular-Bcells GSM258664 CELL  
 77- Follicular-Bcells GSM258663 CELL  
 76- MZ-Bcell GSM258627 CELL  
 75- MZ-Bcell GSM258621 CELL  
 74- BAF3 GSM258620 CELL  
 73- BAF3 GSM258619 CELL  
 72- Tregs GSM258778 CELL  
 71- Tregs GSM258777 CELL  
 70- T-cells-CD8+ GSM258776 CELL  
 69- T-cells-CD8+ GSM258774 CELL  
 68- T-cells-CD4+ GSM258773 CELL  
 67- T-cells-CD4+ GSM258744 CELL  
 66- Thymocyte-DN GSM465595 CELL  
 65- Osteoclasts GSM258743 CELL  
 64- Microglia GSM258721 CELL  
 63- Microglia GSM258721 CELL  
 62- PMM-7h GSM268706 CELL  
 61- PMM-7h GSM268705 CELL  
 60- PMM-LPS-7h GSM268702 CELL  
 59- PMM-LPS-6h GSM258701 CELL  
 58- PMM-LPS-6h GSM258700 CELL  
 57- BMM-LPS-6h GSM268699 CELL  
 56- BMM-LPS-6h GSM268699 CELL  
 55- BMM GSM258694 CELL  
 54- BMM GSM258694 CELL  
 53- Plasmacytoid-DC GSM258650 CELL  
 52- CD8a-DC GSM258649 CELL  
 51- CD8a-DC GSM258647 CELL  
 50- CD8a-DC GSM258647 CELL  
 49- CD8a+DC GSM258646 CELL  
 48- CD8a+DC GSM258645 CELL  
 47- NK-cells GSM258732 CELL  
 46- NK-cells GSM258731 CELL  
 45- Mast-cells-IgE+Ad GSM258718 CELL  
 44- Mast-cells-IgE+Ad GSM258717 CELL  
 43- Mast-cells-IgE GSM258714 CELL  
 42- Mast-cells-IgE GSM258713 CELL  
 41- Mast-cells GSM258712 CELL  
 40- Mast-cells GSM258711 CELL  
 39- Granulocytes GSM258668 CELL  
 38- Granulocytes GSM258667 CELL  
 37- GMP GSM258666 CELL  
 36- GMP GSM258665 CELL  
 35- GMP GSM258642 CELL  
 34- GMP GSM258642 CELL  
 33- MIEP GSM258720 CELL  
 32- MIEP GSM258719 CELL  
 31- HESC GSM258770 CELL  
 30- HESC GSM258769 CELL  
 29- Bone marrow GSM258628 CELL  
 28- Bone marrow GSM258627 CELL  
 27- Paneth-cells-GF-1 GSM116357 CELL  
 26- Paneth-cells-GF-1 GSM116350 CELL  
 25- Paneth-cells GSM116350 CELL  
 24- Paneth-cells GSM116359 CELL  
 23- Paneth-cells GSM318589 CELL  
 22- Paneth-cells GSM318590 CELL  
 21- Colon-Crypt GSM480375 cel  
 20- Colon-Crypt GSM480374 cel  
 19- Colon-Vill GSM480363 cel  
 18- Colon-Vill GSM480362 cel  
 17- Colon-IEC-GF GSM349880 CELL  
 16- Colon-IEC-GF GSM350375 CELL  
 15- Ileum-IEC-GF GSM350376 CELL  
 14- Ileum-IEC GSM350371 CELL  
 13- Small-intestine-epithelium RMINEP002001 CELL  
 12- Small-intestine-epithelium RMINEP001001 CELL  
 11- FAE RMPYEP002001 CELL  
 10- FAE RMPYEP001001 CELL  
 09- Ileum-IEC GSM190797 CELL  
 08- Ileum-IEC GSM190796 CELL  
 07- Ileum-IEC GSM190795 CELL  
 06- CT-v-M-cells GSM190794 CELL  
 05- CT-v-M-cells GSM190793 CELL  
 04- CT-v-M-cells GSM190792 CELL  
 03- PP-M-cells GSM190791 CELL  
 02- PP-M-cells GSM190790 CELL  
 01- PP-M-cells GSM190789 CELL



### Cluster0094\_High in astrocytes & Neuro2A cells (22 nodes)

468.4  
443.8  
419.1  
394.5  
369.8  
345.2  
320.5  
295.9  
271.2  
246.5  
221.9  
197.2  
172.6  
147.9  
123.3  
98.6  
74  
49.3  
24.7  
0

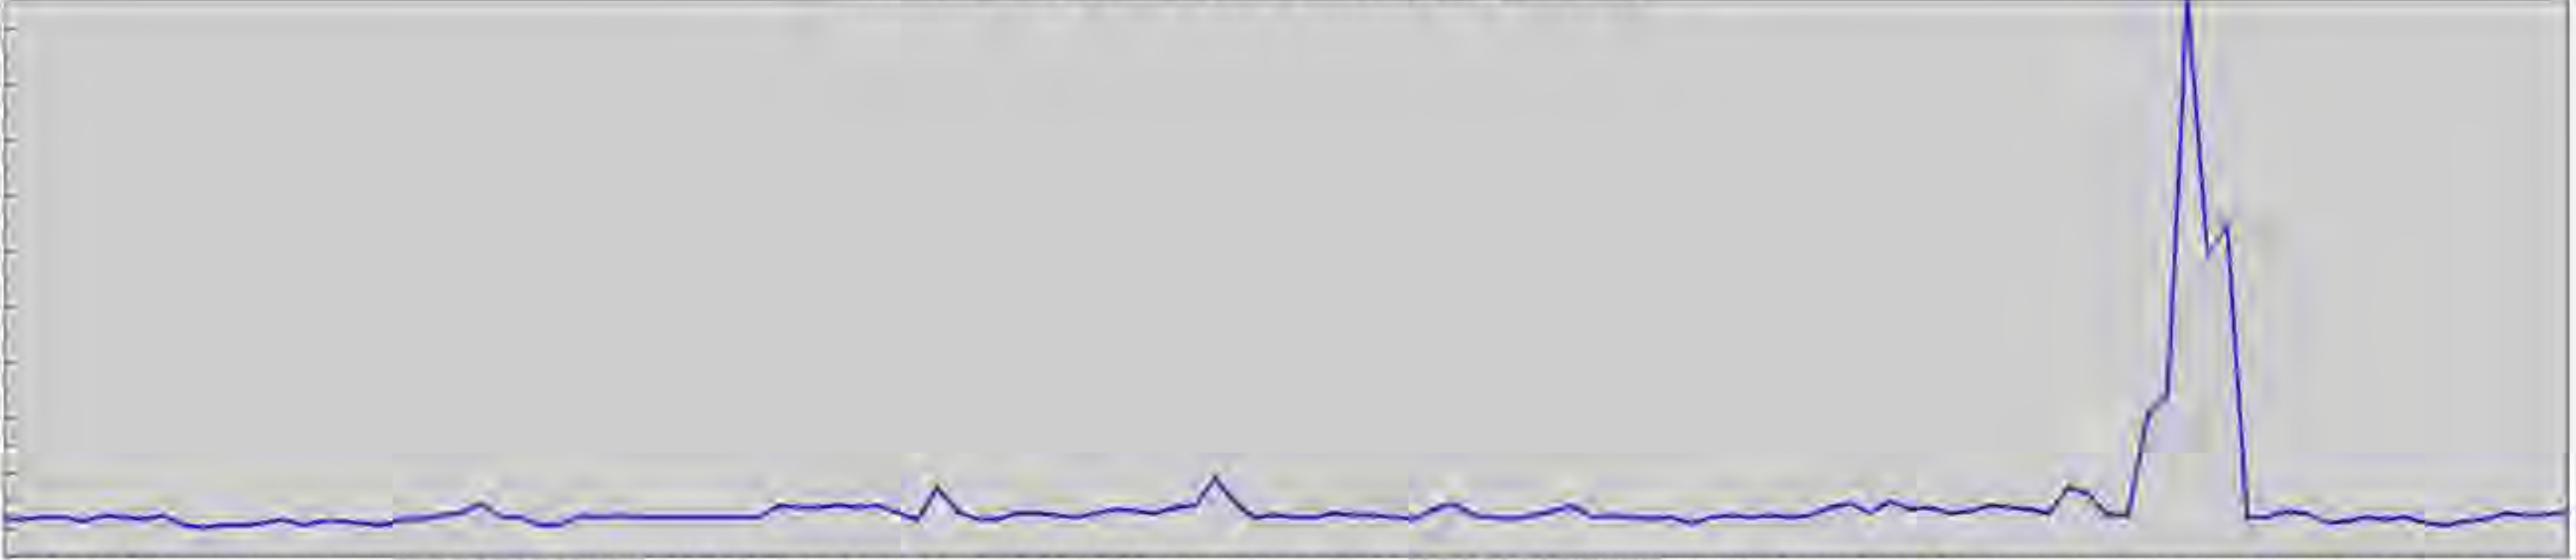

130-NALT GSM289411 CELL  
129-NALT GSM289410 CELL  
128-NALT GSM289409 CELL  
127-NALT GSM289408 CELL  
126- Colon-d9 GSM1988105 CELL  
125- Colon-d9 GSM1988104 CELL  
124- Colon-d9 GSM1988103 CELL  
123- Colon-d4 GSM1988102 CELL  
122- Colon-d4 GSM1988101 CELL  
121- Intestine-large GSM258676 CELL  
120- Intestine-large GSM258675 CELL  
119- Intestine-small GSM258678 CELL  
118- Intestine-small GSM258679 CELL  
117- Lymph-nodes GSM258691 CELL  
116- Lymph-nodes GSM258726 CELL  
115- Spleen GSM258767 CELL  
114- Spleen GSM258767 CELL  
113- Neuro2a GSM258728 CELL  
112- Neuro2a GSM258728 CELL  
111- Astrocytes GSM241898 CELL  
110- mimb GSM258726 CELL  
109- mimb GSM258725 CELL  
108- MIMCD3 GSM258724 CELL  
107- MIMCD3 GSM258723 CELL  
106- Bruce4 GSM258666 CELL  
105- Bruce4 GSM258666 CELL  
104- C2C12 GSM258690 CELL  
103- C2C12 GSM258629 CELL  
102- NIH3T3 GSM258739 CELL  
101- NIH3T3 GSM258739 CELL  
100- 3T3-L1 GSM258610 CELL  
99- 3T3-L1 GSM258609 CELL  
98- 10T1/2 GSM258632 CELL  
97- 10T1/2 GSM258631 CELL  
96- Osteoblast-d21 GSM258740 CELL  
95- Osteoblast-d21 GSM258739 CELL  
94- Osteoblast-d14 GSM258738 CELL  
93- Osteoblast-d14 GSM258737 CELL  
92- Osteoblast-d5 GSM258742 CELL  
91- Osteoblast-d5 GSM258741 CELL  
90- Chondrocytes GSM266741 CELL  
89- Chondrocytes GSM266740 CELL  
88- Nat Helper cell GSM465594 CELL  
87- Nat Helper cell GSM465593 CELL  
86- Tt cell GSM465596 CELL  
85- MS-1 GSM234692 CELL  
84- Lymph-endo-cells GSM143704 CELL  
83- P-FDC GSM481977 CELL  
82- P-FDC GSM481978 CELL  
81- P-FDC GSM481976 CELL  
80- F-L Y RMLNDCC003001 CELL  
79- F-L Y RMLNDCC003001 CELL  
78- Follicular-Bcells GSM258664 CELL  
77- Follicular-Bcells GSM258664 CELL  
76- MZ-Bcell GSM258622 CELL  
75- MZ-Bcell GSM258621 CELL  
74- BAF3 GSM258620 CELL  
73- BAF3 GSM258619 CELL  
72- Tregs GSM258778 CELL  
71- Tregs GSM258777 CELL  
70- T-cells-CD8+ GSM258776 CELL  
69- T-cells-CD8+ GSM258774 CELL  
68- T-cells-CD4+ GSM258773 CELL  
67- T-cells-CD4+ GSM258744 CELL  
66- Thymocyte-DN GSM465595 CELL  
65- Osteoclasts GSM258743 CELL  
64- Microglia GSM258721 CELL  
63- Microglia GSM258721 CELL  
62- P-MM-LPS-7h GSM268706 CELL  
61- P-MM-LPS-7h GSM268706 CELL  
60- P-MM-LPS-7h GSM268705 CELL  
59- P-MM-LPS-6h GSM258702 CELL  
58- P-MM-LPS-6h GSM258702 CELL  
57- BMM-LPS-6h GSM268699 CELL  
56- BMM-LPS-6h GSM268699 CELL  
55- BMM-LPS-6h GSM268699 CELL  
54- BMM-LPS-6h GSM268699 CELL  
53- Pasmacryloid-DC GSM258650 CELL  
52- Pasmacryloid-DC GSM258649 CELL  
51- CD8a-DC GSM258648 CELL  
50- CD8a-DC GSM258647 CELL  
49- CD8a+DC GSM258646 CELL  
48- CD8a+DC GSM258646 CELL  
47- NK-cells GSM258732 CELL  
46- NK-cells GSM258731 CELL  
45- Mast-cells-IgE+Ad GSM258719 CELL  
44- Mast-cells-IgE+Ad GSM258717 CELL  
43- Mast-cells-IgE GSM258714 CELL  
42- Mast-cells-IgE GSM258713 CELL  
41- Mast-cells GSM258712 CELL  
40- Mast-cells GSM258712 CELL  
39- Granulocytes GSM258668 CELL  
38- Granulocytes GSM258667 CELL  
37- GMP GSM258666 CELL  
36- GMP GSM258666 CELL  
35- CMP GSM258642 CELL  
34- CMP GSM258642 CELL  
33- MIEP GSM258720 CELL  
32- MIEP GSM258720 CELL  
31- HSC GSM258770 CELL  
30- HSC GSM258770 CELL  
29- Bone marrow GSM258628 CELL  
28- Bone marrow GSM258627 CELL  
27- Paneth-cells-GF-1 GSM116357 CELL  
26- Paneth-cells-GF-1 GSM116357 CELL  
25- Paneth-cells GSM116350 CELL  
24- Paneth-cells GSM116359 CELL  
23- Paneth-cells GSM318589 CELL  
22- Paneth-cells GSM318590 CELL  
21- Colon-Crypt GSM480375 CELL  
20- Colon-Crypt GSM480374 CELL  
19- Colon-Vill GSM480363 CELL  
18- Colon-Vill GSM480362 CELL  
17- Colon-IEC-GF GSM349880 CELL  
16- Colon-IEC-GF GSM350375 CELL  
15- Ileum-IEC-GF GSM350376 CELL  
14- Ileum-IEC GSM350371 CELL  
13- Small-intestine-epithelium RMINEP002001 CELL  
12- Small-intestine-epithelium RMINEP001001 CELL  
11- FAE-RMPYEP001001 CELL  
10- FAE-RMPYEP001001 CELL  
09- Ileum-IEC GSM190797 CELL  
08- Ileum-IEC GSM190796 CELL  
07- Ileum-IEC GSM190795 CELL  
06- CT-v-M-cells GSM190794 CELL  
05- CT-v-M-cells GSM190793 CELL  
04- CT-v-M-cells GSM190792 CELL  
03- PP-M-cells GSM190791 CELL  
02- PP-M-cells GSM190790 CELL  
01- PP-M-cells GSM190789 CELL



Cluster0095\_Intestine-related (21 nodes)

10,486.7  
9,936.7  
9,384.7  
8,832.6  
8,280.6  
7,728.5  
7,176.5  
6,624.5  
6,072.4  
5,520.4  
4,968.4  
4,416.3  
3,864.3  
3,312.2  
2,760.2  
2,208.2  
1,656.1  
1,104.1  
552  
0

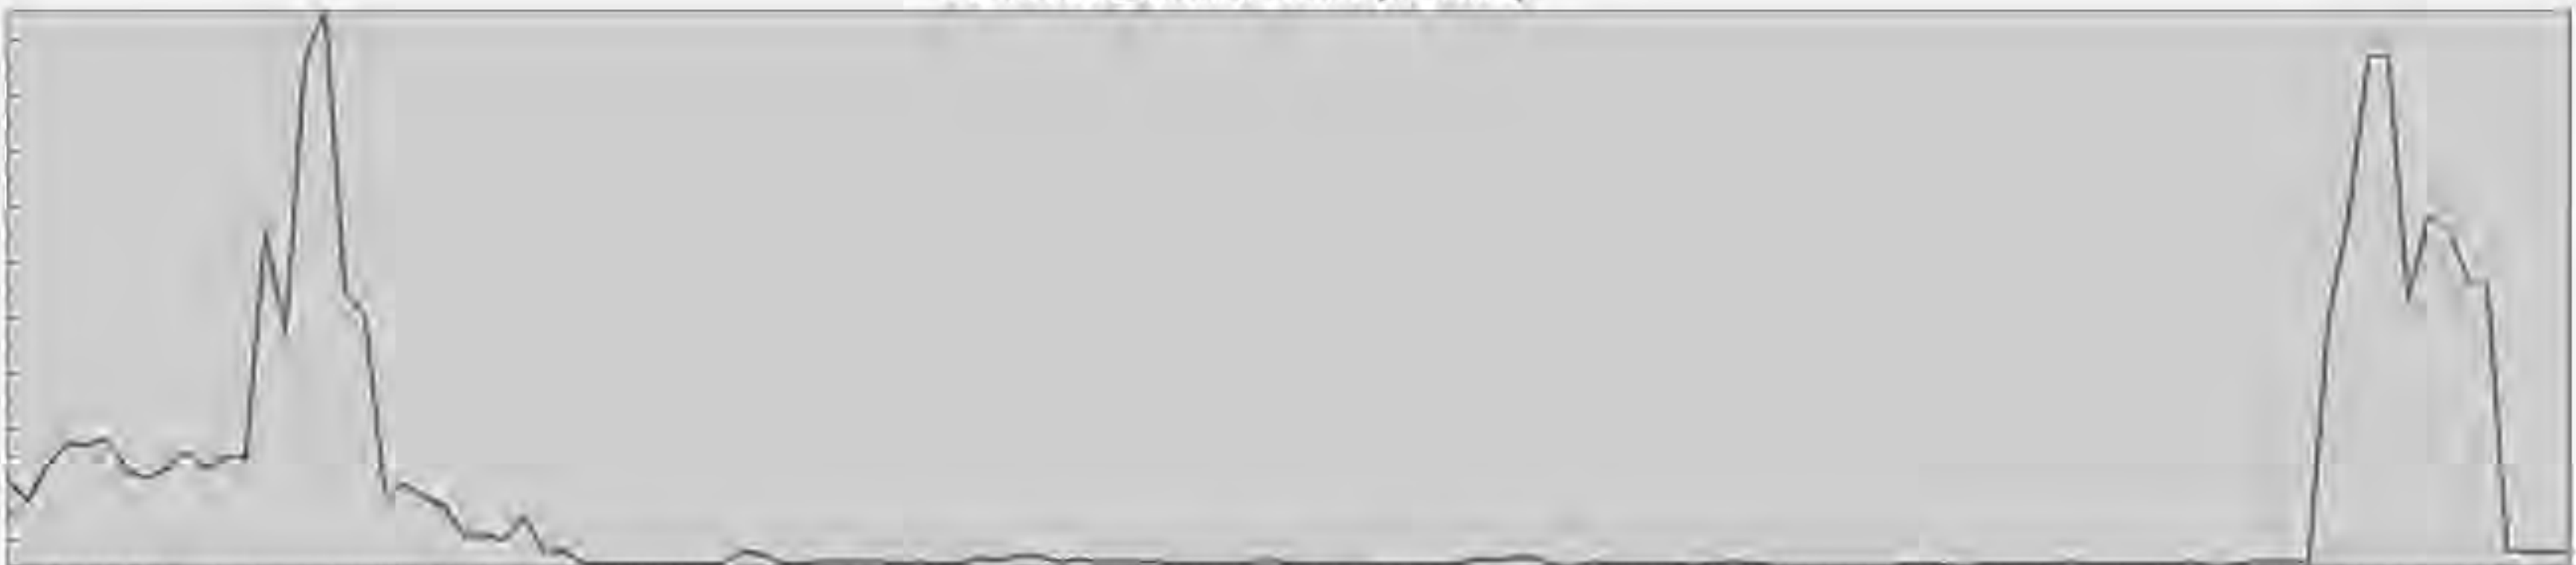

01-PP-M-cells\_GSM190789.CEL  
 02-PP-M-cells\_GSM190791.CEL  
 03-PP-M-cells\_GSM190792.CEL  
 04-CT-Y-M-cells\_GSM190793.CEL  
 05-CT-Y-M-cells\_GSM190794.CEL  
 06-CT-W-M-cells\_GSM190795.CEL  
 07-Ileum-IEC\_GSM190796.CEL  
 08-Ileum-IEC\_GSM190797.CEL  
 09-Ileum-IEC\_GSM190798.CEL  
 10-FAE-RMPYEP001001.CEL  
 11-FAE-RMPYEP002001.CEL  
 12-Small-intestine-epithelium\_RMINEP001001.CEL  
 13-Small-intestine-epithelium\_RMINEP002001.CEL  
 14-Ileum-IEC\_GSM350371.CEL  
 15-Ileum-IEC\_GSM350375.CEL  
 16-Colon-IEC-Gf\_GSM350376.CEL  
 17-Colon-IEC-Gf\_GSM349880.CEL  
 18-Colon-Vill-GSM480362.CEL  
 19-Colon-Vill-GSM480363.CEL  
 20-Colon-Crypt\_GSM480374.CEL  
 21-Colon-Crypt\_GSM480375.CEL  
 22-Paneth-cells\_GSM318589.CEL  
 23-Paneth-cells\_GSM318590.CEL  
 24-Paneth-cells\_GSM116359.CEL  
 25-Paneth-cells\_GSM116359.CEL  
 26-Paneth-cells-Gf-1-GSM116357.CEL  
 27-Paneth-cells-Gf-1-GSM116357.CEL  
 28-Bone marrow\_GSM258627.CEL  
 29-Bone marrow\_GSM258627.CEL  
 30-NALT\_GSM289411.CEL  
 31-NALT\_GSM289410.CEL  
 32-NALT\_GSM289409.CEL  
 33-NALT\_GSM289408.CEL  
 34-Colon-d9-GSM198810.CEL  
 35-Colon-d9-GSM198810.CEL  
 36-Colon-d4-GSM198810.CEL  
 37-Colon-d4-GSM198810.CEL  
 38-Colon-d4-GSM198810.CEL  
 39-Colon-d4-GSM198810.CEL  
 40-Colon-d4-GSM198810.CEL  
 41-Intestine-large\_GSM258676.CEL  
 42-Intestine-large\_GSM258677.CEL  
 43-Intestine-small\_GSM258677.CEL  
 44-Intestine-small\_GSM258691.CEL  
 45-Lymph-nodes\_GSM258691.CEL  
 46-Spleen\_GSM258766.CEL  
 47-Spleen\_GSM258767.CEL  
 48-Neuro2a\_GSM258728.CEL  
 49-Neuro2a\_GSM258728.CEL  
 50-Astrocytes\_GSM241898.CEL  
 51-ming\_GSM258726.CEL  
 52-ming\_GSM258726.CEL  
 53-mim6\_GSM258725.CEL  
 54-MIMCD3\_GSM258724.CEL  
 55-MIMCD3\_GSM258724.CEL  
 56-Bruce4\_GSM258690.CEL  
 57-Bruce4\_GSM258690.CEL  
 58-C2C12\_GSM258690.CEL  
 59-NH3T3\_GSM258739.CEL  
 60-NH3T3\_GSM258739.CEL  
 61-3T3-L1\_GSM258610.CEL  
 62-3T3-L1\_GSM258609.CEL  
 63-10T12\_GSM258632.CEL  
 64-10T12\_GSM258631.CEL  
 65-Osteoblast-d21\_GSM258740.CEL  
 66-Osteoblast-d21\_GSM258739.CEL  
 67-Osteoblast-d14\_GSM258738.CEL  
 68-Osteoblast-d14\_GSM258737.CEL  
 69-Osteoblast-d5\_GSM258742.CEL  
 70-Osteoblast-d5\_GSM258741.CEL  
 71-Chondrocytes\_GSM266741.CEL  
 72-Chondrocytes\_GSM266740.CEL  
 73-Nat Helper cell\_GSM465594.CEL  
 74-Nat Helper cell\_GSM465593.CEL  
 75-T cell\_GSM465596.CEL  
 76-MS-1\_GSM234692.CEL  
 77-Lymph-endo-cells\_GSM143704.CEL  
 78-Lymph-endo-cells\_GSM481977.CEL  
 79-P-FDC\_GSM481978.CEL  
 80-P-FDC\_GSM481978.CEL  
 81-P-FDC\_GSM481978.CEL  
 82-P-FDC\_GSM481978.CEL  
 83-L-Y-RMLNDC002001.CEL  
 84-L-Y-RMLNDC002001.CEL  
 85-Follicular-B-cells\_GSM258664.CEL  
 86-Follicular-B-cells\_GSM258663.CEL  
 87-MZ-Bcell\_GSM258622.CEL  
 88-MZ-Bcell\_GSM258621.CEL  
 89-BAF3\_GSM258620.CEL  
 90-BAF3\_GSM258619.CEL  
 91-Tregs\_GSM258778.CEL  
 92-Tregs\_GSM258777.CEL  
 93-T-cells-CD8+GSM258776.CEL  
 94-T-cells-CD8+GSM258775.CEL  
 95-T-cells-CD4+GSM258774.CEL  
 96-T-cells-CD4+GSM258773.CEL  
 97-Thymocyte-DN\_GSM465595.CEL  
 98-Osteoclasts\_GSM258743.CEL  
 99-Microglia\_GSM258721.CEL  
 100-MM-LPS-7h\_GSM258705.CEL  
 101-MM-LPS-7h\_GSM258705.CEL  
 102-MM-LPS-6h\_GSM258702.CEL  
 103-MM-LPS-6h\_GSM258702.CEL  
 104-MM-LPS-6h\_GSM258699.CEL  
 105-MM-LPS-6h\_GSM258699.CEL  
 106-MM-LPS-6h\_GSM258694.CEL  
 107-MM-LPS-6h\_GSM258694.CEL  
 108-MM-LPS-6h\_GSM258694.CEL  
 109-MM-LPS-6h\_GSM258694.CEL  
 110-MM-LPS-6h\_GSM258694.CEL  
 111-MM-LPS-6h\_GSM258694.CEL  
 112-MM-LPS-6h\_GSM258694.CEL  
 113-MM-LPS-6h\_GSM258694.CEL  
 114-MM-LPS-6h\_GSM258694.CEL  
 115-MM-LPS-6h\_GSM258694.CEL  
 116-MM-LPS-6h\_GSM258694.CEL  
 117-MM-LPS-6h\_GSM258694.CEL  
 118-MM-LPS-6h\_GSM258694.CEL  
 119-MM-LPS-6h\_GSM258694.CEL  
 120-MM-LPS-6h\_GSM258694.CEL  
 121-MM-LPS-6h\_GSM258694.CEL  
 122-MM-LPS-6h\_GSM258694.CEL  
 123-MM-LPS-6h\_GSM258694.CEL  
 124-MM-LPS-6h\_GSM258694.CEL  
 125-MM-LPS-6h\_GSM258694.CEL  
 126-MM-LPS-6h\_GSM258694.CEL  
 127-MM-LPS-6h\_GSM258694.CEL  
 128-MM-LPS-6h\_GSM258694.CEL  
 129-MM-LPS-6h\_GSM258694.CEL  
 130-MM-LPS-6h\_GSM258694.CEL



Cluster0096\_High in NALT (21 nodes)

989.8  
937.7  
885.6  
833.5  
781.4  
729.3  
677.2  
625.1  
573  
520.9  
468.8  
416.7  
364.6  
312.6  
260.5  
208.4  
156.3  
104.2  
52.1  
0

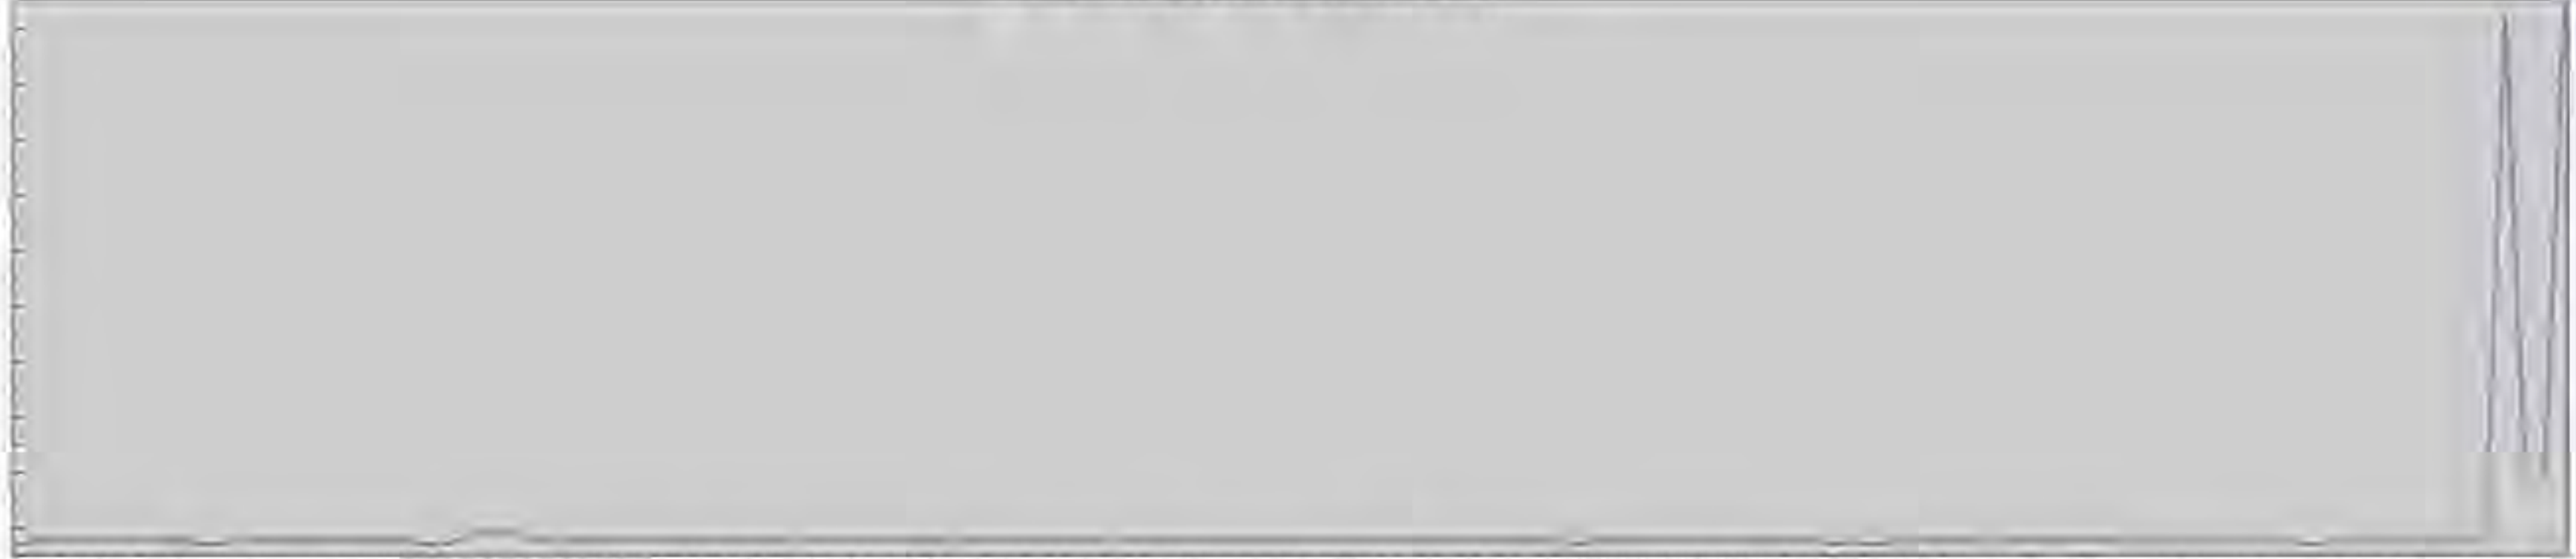

|     |                            |              |     |
|-----|----------------------------|--------------|-----|
| 30  | NALT                       | GSM289411    | CEL |
| 129 | NALT                       | GSM289410    | CEL |
| 128 | NALT                       | GSM289409    | CEL |
| 127 | NALT                       | GSM289408    | CEL |
| 126 | Colon-d9                   | GSM1988105   | CEL |
| 125 | Colon-d9                   | GSM1988104   | CEL |
| 124 | Colon-d9                   | GSM1988103   | CEL |
| 123 | Colon-d4                   | GSM1988102   | CEL |
| 122 | Colon-d4                   | GSM1988101   | CEL |
| 121 | Intestine-large            | GSM258676    | CEL |
| 120 | Intestine-large            | GSM258675    | CEL |
| 119 | Intestine-small            | GSM258674    | CEL |
| 118 | Intestine-small            | GSM258673    | CEL |
| 117 | Lymph-nodes                | GSM258672    | CEL |
| 116 | Spleen                     | GSM258671    | CEL |
| 115 | Spleen                     | GSM258670    | CEL |
| 114 | Neuro2a                    | GSM258669    | CEL |
| 113 | Neuro2a                    | GSM258668    | CEL |
| 112 | Astrocytes                 | GSM241898    | CEL |
| 111 | ming                       | GSM258667    | CEL |
| 110 | ming                       | GSM258666    | CEL |
| 109 | ming                       | GSM258665    | CEL |
| 108 | MIMCD3                     | GSM258664    | CEL |
| 107 | MIMCD3                     | GSM258663    | CEL |
| 106 | Bruce4                     | GSM258662    | CEL |
| 105 | Bruce4                     | GSM258661    | CEL |
| 104 | C2C12                      | GSM258660    | CEL |
| 103 | C2C12                      | GSM258659    | CEL |
| 102 | NH3T3                      | GSM258658    | CEL |
| 101 | NH3T3                      | GSM258657    | CEL |
| 100 | 3T3-L1                     | GSM258656    | CEL |
| 99  | 3T3-L1                     | GSM258655    | CEL |
| 98  | 10T12                      | GSM258654    | CEL |
| 97  | 10T12                      | GSM258653    | CEL |
| 96  | Osteoblast-d21             | GSM258652    | CEL |
| 95  | Osteoblast-d14             | GSM258651    | CEL |
| 94  | Osteoblast-d14             | GSM258650    | CEL |
| 93  | Osteoblast-d14             | GSM258649    | CEL |
| 92  | Osteoblast-d5              | GSM258648    | CEL |
| 91  | Osteoblast-d5              | GSM258647    | CEL |
| 90  | Chondrocytes               | GSM258646    | CEL |
| 89  | Chondrocytes               | GSM258645    | CEL |
| 88  | Nat Helper cell            | GSM465594    | CEL |
| 87  | Nat Helper cell            | GSM465593    | CEL |
| 86  | Tt cell                    | GSM465592    | CEL |
| 85  | MS-1                       | GSM234692    | CEL |
| 84  | Lymph-endo-cells           | GSM143704    | CEL |
| 83  | PP-FDC                     | GSM481977    | CEL |
| 82  | PP-FDC                     | GSM481978    | CEL |
| 81  | PP-FDC                     | GSM481979    | CEL |
| 80  | E-LY                       | RMLNDC003001 | CEL |
| 79  | E-LY                       | RMLNDC003001 | CEL |
| 78  | Follicular-Bcells          | GSM258664    | CEL |
| 77  | Follicular-Bcells          | GSM258663    | CEL |
| 76  | MZ-Bcell                   | GSM258662    | CEL |
| 75  | MZ-Bcell                   | GSM258661    | CEL |
| 74  | BAF3                       | GSM258660    | CEL |
| 73  | BAF3                       | GSM258659    | CEL |
| 72  | Tregs                      | GSM258658    | CEL |
| 71  | T-cells-CD8+               | GSM258657    | CEL |
| 70  | T-cells-CD8+               | GSM258656    | CEL |
| 69  | T-cells-CD4+               | GSM258655    | CEL |
| 68  | T-cells-CD4+               | GSM258654    | CEL |
| 67  | T-cells-CD4+               | GSM258653    | CEL |
| 66  | Thymocyte-DN               | GSM465595    | CEL |
| 65  | Osteoclasts                | GSM258674    | CEL |
| 64  | Microglia                  | GSM258672    | CEL |
| 63  | Microglia                  | GSM258671    | CEL |
| 62  | MM-LPS-7h                  | GSM258670    | CEL |
| 61  | MM-LPS-7h                  | GSM258669    | CEL |
| 60  | MM-LPS-6h                  | GSM258668    | CEL |
| 59  | MM-LPS-6h                  | GSM258667    | CEL |
| 58  | MM-LPS-6h                  | GSM258666    | CEL |
| 57  | MM-LPS-6h                  | GSM258665    | CEL |
| 56  | MM-LPS-6h                  | GSM258664    | CEL |
| 55  | MM-LPS-6h                  | GSM258663    | CEL |
| 54  | MM-LPS-6h                  | GSM258662    | CEL |
| 53  | MM-LPS-6h                  | GSM258661    | CEL |
| 52  | MM-LPS-6h                  | GSM258660    | CEL |
| 51  | MM-LPS-6h                  | GSM258659    | CEL |
| 50  | CD8a-DC                    | GSM258647    | CEL |
| 49  | CD8a-DC                    | GSM258646    | CEL |
| 48  | CD8a+DC                    | GSM258645    | CEL |
| 47  | NK-cells                   | GSM258673    | CEL |
| 46  | NK-cells                   | GSM258672    | CEL |
| 45  | Mast-cells-IgE+Ad          | GSM258671    | CEL |
| 44  | Mast-cells-IgE+Ad          | GSM258670    | CEL |
| 43  | Mast-cells-IgE             | GSM258669    | CEL |
| 42  | Mast-cells-IgE             | GSM258668    | CEL |
| 41  | Mast-cells                 | GSM258667    | CEL |
| 40  | Granulocytes               | GSM258666    | CEL |
| 39  | Granulocytes               | GSM258665    | CEL |
| 38  | GMP                        | GSM258664    | CEL |
| 37  | GMP                        | GSM258663    | CEL |
| 36  | GMP                        | GSM258662    | CEL |
| 35  | GMP                        | GSM258661    | CEL |
| 34  | GMP                        | GSM258660    | CEL |
| 33  | GMP                        | GSM258659    | CEL |
| 32  | MIEP                       | GSM258658    | CEL |
| 31  | MIEP                       | GSM258657    | CEL |
| 30  | HESC                       | GSM258656    | CEL |
| 29  | Bone marrow                | GSM258655    | CEL |
| 28  | paneth-cells-GE            | GSM116358    | CEL |
| 27  | paneth-cells-GE            | GSM116357    | CEL |
| 26  | paneth-cells-GE            | GSM116356    | CEL |
| 25  | paneth-cells               | GSM116355    | CEL |
| 24  | paneth-cells               | GSM116354    | CEL |
| 23  | paneth-cells               | GSM318589    | CEL |
| 22  | paneth-cells               | GSM318590    | CEL |
| 21  | Colon-Crypt                | GSM480375    | CEL |
| 20  | Colon-Crypt                | GSM480374    | CEL |
| 19  | Colon-Vill                 | GSM480363    | CEL |
| 18  | Colon-Vill                 | GSM480362    | CEL |
| 17  | Colon-IEC-Gf               | GSM349880    | CEL |
| 16  | Colon-IEC-Gf               | GSM350375    | CEL |
| 15  | Ileum-IEC-TGF              | GSM350376    | CEL |
| 14  | Ileum-IEC                  | GSM350371    | CEL |
| 13  | Small-intestine-epithelium | RMINEP002001 | CEL |
| 12  | Small-intestine-epithelium | RMINEP001001 | CEL |
| 11  | FAE                        | RMPYEP002001 | CEL |
| 10  | FAE                        | RMPYEP001001 | CEL |
| 09  | Ileum-IEC                  | GSM190797    | CEL |
| 08  | Ileum-IEC                  | GSM190796    | CEL |
| 07  | Ileum-IEC                  | GSM190795    | CEL |
| 06  | CT-w-M-cells               | GSM190794    | CEL |
| 05  | CT-w-M-cells               | GSM190793    | CEL |
| 04  | CT-y-M-cells               | GSM190792    | CEL |
| 03  | PP-M-cells                 | GSM190791    | CEL |
| 02  | PP-M-cells                 | GSM190790    | CEL |
| 01  | PP-M-cells                 | GSM190789    | CEL |



Cluster0097\_House keeping-transcription (21 nodes)

2,519.5  
2,386.9  
2,254.2  
2,121.6  
1,989  
1,856.4  
1,723.8  
1,591.2  
1,458.6  
1,326  
1,193.4  
1,060.8  
928.2  
795.6  
663  
530.4  
397.8  
265.2  
132.6  
0

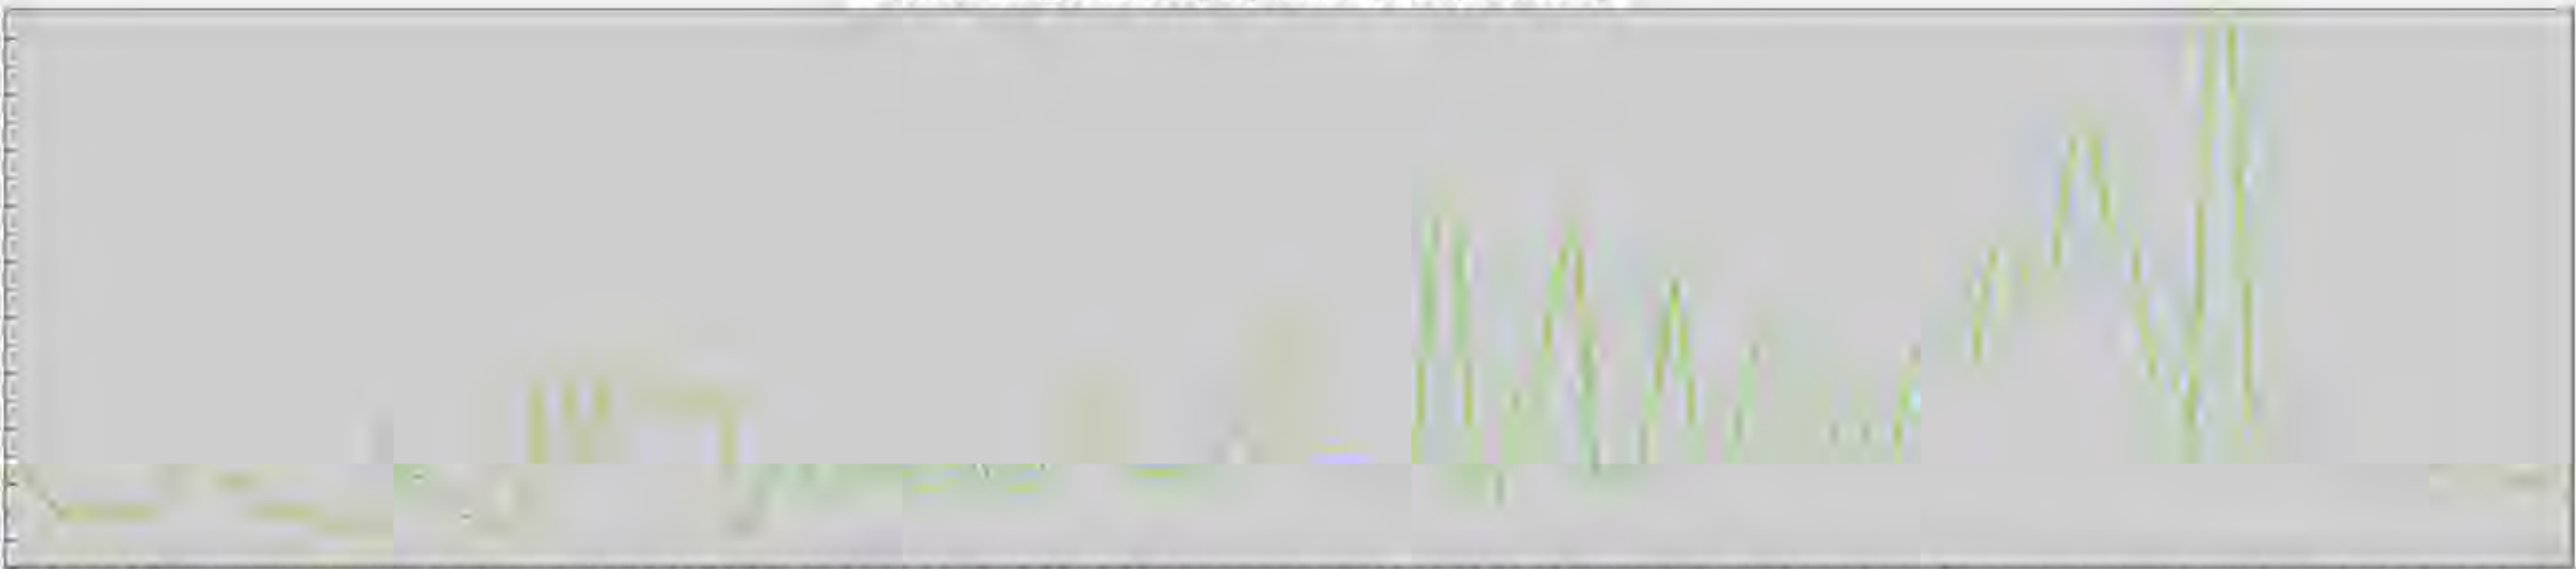

130-NALT GSM289411.CEL  
129-NALT GSM289410.CEL  
128-NALT GSM289409.CEL  
127-NALT GSM289408.CEL  
126-Colon-d9 GSM1988105.CEL  
125-Colon-d9 GSM1988104.CEL  
124-Colon-d9 GSM1988103.CEL  
123-Colon-d4 GSM1988102.CEL  
122-Colon-d4 GSM1988101.CEL  
121-Intestine-large GSM258676.CEL  
120-Intestine-large GSM258675.CEL  
119-Intestine-small GSM258678.CEL  
118-Intestine-small GSM258692.CEL  
117-Lymph-nodes GSM258691.CEL  
116-Lymph-nodes GSM258726.CEL  
115-Spleen GSM258768.CEL  
114-Spleen GSM258767.CEL  
113-Neuro2a GSM258728.CEL  
112-Neuro2a GSM258727.CEL  
111-Astrocytes GSM241898.CEL  
110-mim6 GSM258725.CEL  
109-mim6 GSM258724.CEL  
108-MIMCD3 GSM258723.CEL  
107-MIMCD3 GSM258722.CEL  
106-Bruce4 GSM258656.CEL  
105-Bruce4 GSM258655.CEL  
104-C2C12 GSM258690.CEL  
103-C2C12 GSM258629.CEL  
102-NH3T3 GSM258739.CEL  
101-NH3T3 GSM258738.CEL  
100-3T3-L1 GSM258610.CEL  
99-3T3-L1 GSM258609.CEL  
98-10T12 GSM258632.CEL  
97-10T12 GSM258631.CEL  
96-Osteoblast-d21 GSM258740.CEL  
95-Osteoblast-d21 GSM258739.CEL  
94-Osteoblast-d14 GSM258738.CEL  
93-Osteoblast-d14 GSM258737.CEL  
92-Osteoblast-d5 GSM258742.CEL  
91-Osteoblast-d5 GSM258741.CEL  
90-Chondrocytes GSM266741.CEL  
89-Chondrocytes GSM266740.CEL  
88-Nat Helper cell GSM465594.CEL  
87-Nat Helper cell GSM465593.CEL  
86-LT cell GSM465596.CEL  
85-MS-1 GSM234692.CEL  
84-Lymph-endo-cells GSM143704.CEL  
83-Lymph-endo-cells GSM481977.CEL  
82-Lymph-endo-cells GSM481978.CEL  
81-Lymph-endo-cells GSM481976.CEL  
80-Lymph-endo-cells GSM481977.CEL  
79-Lymph-endo-cells GSM481978.CEL  
78-Follicular-Bcells GSM258664.CEL  
77-Follicular-Bcells GSM258663.CEL  
76-MZ-Bcell GSM258622.CEL  
75-MZ-Bcell GSM258621.CEL  
74-BAF3 GSM258620.CEL  
73-BAF3 GSM258619.CEL  
72-Tregs GSM258778.CEL  
71-Tregs GSM258777.CEL  
70-T-cells-CD8+ GSM258776.CEL  
69-T-cells-CD8+ GSM258775.CEL  
68-T-cells-CD4+ GSM258774.CEL  
67-T-cells-CD4+ GSM258773.CEL  
66-Thymocyte-DN GSM465595.CEL  
65-Osteoclasts GSM258744.CEL  
64-Osteoclasts GSM258743.CEL  
63-Microglia GSM258721.CEL  
62-Microglia GSM258721.CEL  
61-PM-M-PS-7h GSM258706.CEL  
60-PM-M-PS-7h GSM258705.CEL  
59-PM-M-PS-7h GSM258702.CEL  
58-PM-M-PS-6h GSM258700.CEL  
57-PM-M-PS-6h GSM258699.CEL  
56-PM-M-PS-6h GSM258694.CEL  
55-PM-M-PS-6h GSM258694.CEL  
54-PM-M-PS-6h GSM258694.CEL  
53-PM-M-PS-6h GSM258694.CEL  
52-PM-M-PS-6h GSM258694.CEL  
51-PM-M-PS-6h GSM258694.CEL  
50-PM-M-PS-6h GSM258694.CEL  
49-PM-M-PS-6h GSM258694.CEL  
48-PM-M-PS-6h GSM258694.CEL  
47-NK-cells GSM258732.CEL  
46-NK-cells GSM258731.CEL  
45-Mast-cells-IgE+Ad GSM258718.CEL  
44-Mast-cells-IgE+Ad GSM258717.CEL  
43-Mast-cells-IgE GSM258714.CEL  
42-Mast-cells-IgE GSM258713.CEL  
41-Mast-cells-IgE GSM258712.CEL  
40-Mast-cells-IgE GSM258711.CEL  
39-Granulocytes GSM258668.CEL  
38-Granulocytes GSM258667.CEL  
37-GMP GSM258666.CEL  
36-GMP GSM258665.CEL  
35-GMP GSM258664.CEL  
34-GMP GSM258642.CEL  
33-MEP GSM258720.CEL  
32-MEP GSM258719.CEL  
31-MEP GSM258719.CEL  
30-HSC GSM258770.CEL  
29-Bone marrow GSM258628.CEL  
28-Bone marrow GSM258627.CEL  
27-Paneth-cells-GF GSM116358.CEL  
26-Paneth-cells-GF GSM116357.CEL  
25-Paneth-cells GSM116350.CEL  
24-Paneth-cells GSM116359.CEL  
23-Paneth-cells GSM318589.CEL  
22-Paneth-cells GSM318590.CEL  
21-Colon-Crypt GSM480375.CEL  
20-Colon-Crypt GSM480374.CEL  
19-Colon-Vill GSM480363.CEL  
18-Colon-Vill GSM480362.CEL  
17-Colon-IEC-GF GSM349880.CEL  
16-Colon-IEC-GF GSM350375.CEL  
15-Ileum-IEC GSM350376.CEL  
14-Ileum-IEC GSM350371.CEL  
13-Small-intestine-epithelium RMINEP002901.CEL  
12-Small-intestine-epithelium RMINEP001001.CEL  
11-FAE-RMPYEP002001.CEL  
10-FAE-RMPYEP001001.CEL  
09-Ileum-IEC GSM190797.CEL  
08-Ileum-IEC GSM190796.CEL  
07-Ileum-IEC GSM190795.CEL  
06-CT-v-M-cells GSM190794.CEL  
05-CT-v-M-cells GSM190793.CEL  
04-CT-v-M-cells GSM190792.CEL  
03-PP-M-cells GSM190791.CEL  
02-PP-M-cells GSM190790.CEL  
01-PP-M-cells GSM190789.CEL







Cluster0099\_High in haematopoietic cells (20 nodes)

2,443.1  
2,314.6  
2,185.9  
2,057.4  
1,928.6  
1,800.2  
1,671.6  
1,543  
1,414.4  
1,285.8  
1,157.3  
1,028.7  
900.1  
771.5  
642.9  
514.3  
385.8  
257.2  
128.6  
0

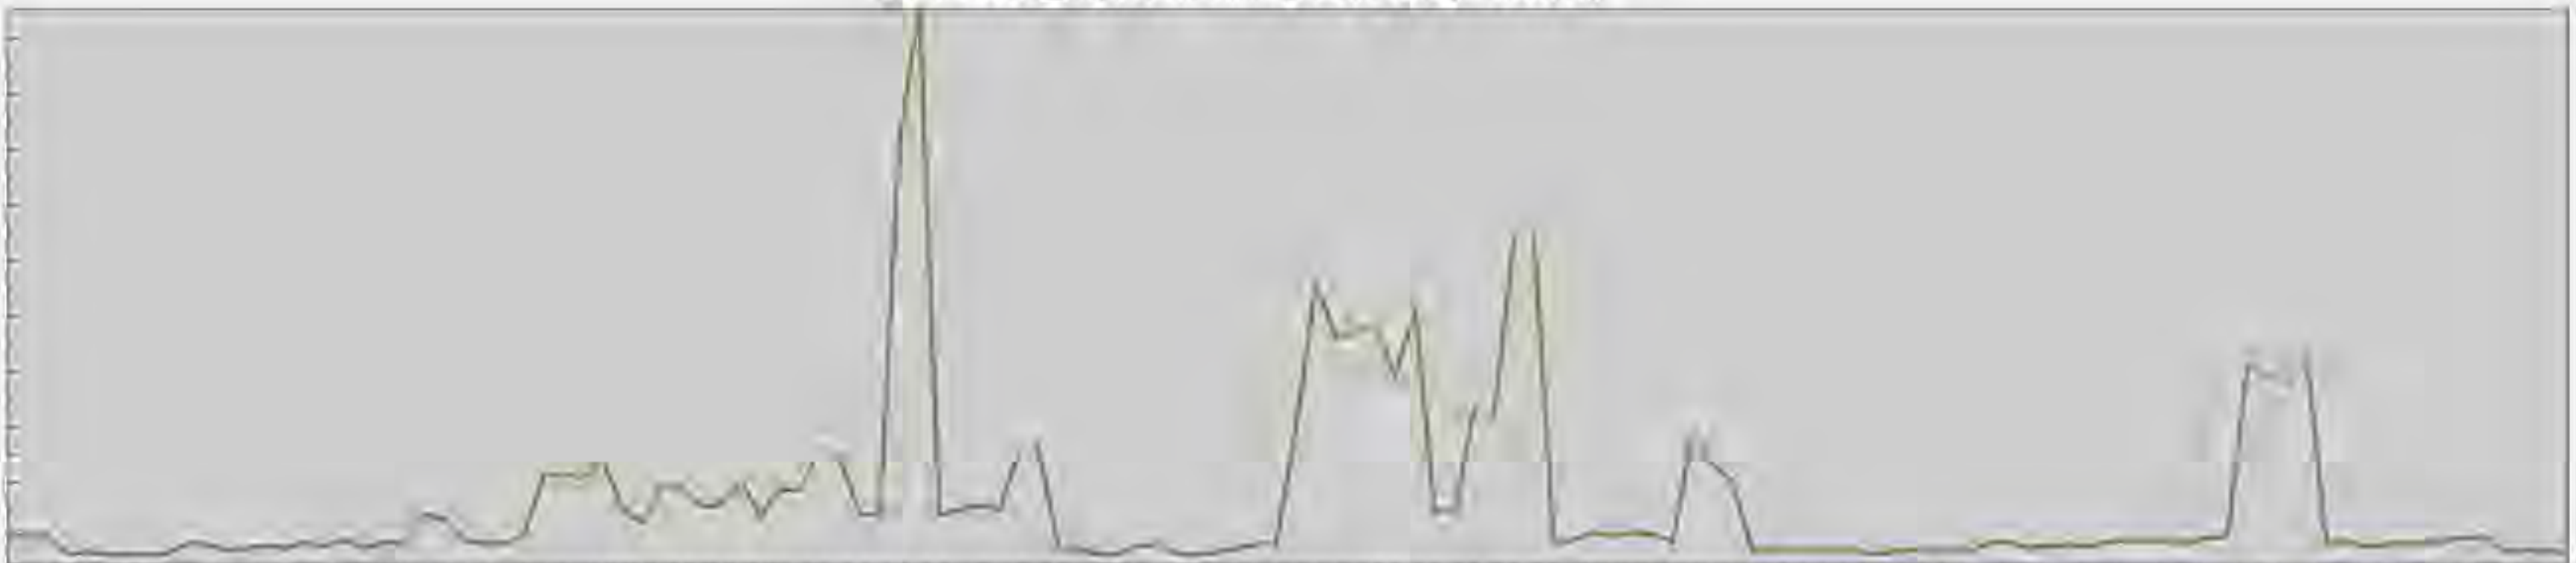

130-NALT GSM289411 CEL  
129-NALT GSM289410 CEL  
128-NALT GSM289409 CEL  
127-NALT GSM289408 CEL  
126-CD9 GSM1988105 CEL  
125-CD9 GSM1988104 CEL  
124-CD9 GSM1988103 CEL  
123-CD9 GSM1988102 CEL  
122-CD9 GSM1988101 CEL  
121-Intestine-large GSM258676 CEL  
120-Intestine-large GSM258675 CEL  
119-Intestine-small GSM258674 CEL  
118-Intestine-small GSM258673 CEL  
117-Lymph-nodes GSM258672 CEL  
116-Spleen GSM258766 CEL  
115-Spleen GSM258767 CEL  
114-Neuro2a GSM258728 CEL  
113-Neuro2a GSM258729 CEL  
112-Astrocytes GSM241898 CEL  
111-mim6 GSM258726 CEL  
110-mim6 GSM258725 CEL  
109-mim6 GSM258724 CEL  
108-MIMCD3 GSM258723 CEL  
107-MIMCD3 GSM258722 CEL  
106-Bruce4 GSM258665 CEL  
105-Bruce4 GSM258666 CEL  
104-C2C12 GSM258690 CEL  
103-C2C12 GSM258691 CEL  
102-NH3T3 GSM258730 CEL  
101-NH3T3 GSM258729 CEL  
100-3T3-L1 GSM258610 CEL  
99-3T3-L1 GSM258609 CEL  
98-10T12 GSM258632 CEL  
97-10T12 GSM258631 CEL  
96-Osteoblast-d21 GSM258740 CEL  
95-Osteoblast-d21 GSM258739 CEL  
94-Osteoblast-d14 GSM258738 CEL  
93-Osteoblast-d14 GSM258737 CEL  
92-Osteoblast-d5 GSM258742 CEL  
91-Osteoblast-d5 GSM258741 CEL  
90-Chondrocytes GSM266741 CEL  
89-Chondrocytes GSM266740 CEL  
88-Nat Helper cell GSM465594 CEL  
87-Nat Helper cell GSM465593 CEL  
86-LT cell GSM465596 CEL  
85-M8-1 GSM234692 CEL  
84-Lymph-endo-cells GSM143704 CEL  
83-P-FDC GSM481977 CEL  
82-P-FDC GSM481978 CEL  
81-P-FDC GSM481976 CEL  
80-LY RMLNDCC003001 CEL  
79-LY RMLNDCC003001 CEL  
78-Follicular-Bcells GSM258664 CEL  
77-Follicular-Bcells GSM258665 CEL  
76-MZ-Bcell GSM258622 CEL  
75-MZ-Bcell GSM258621 CEL  
74-BAF3 GSM258620 CEL  
73-BAF3 GSM258619 CEL  
72-Tregs GSM258778 CEL  
71-Tregs GSM258777 CEL  
70-T-cells-CD8+ GSM258776 CEL  
69-T-cells-CD8+ GSM258774 CEL  
68-T-cells-CD4+ GSM258773 CEL  
67-T-cells-CD4+ GSM258744 CEL  
66-Thymocyte-DN GSM465595 CEL  
65-Osteoclasts GSM258743 CEL  
64-Microglia GSM258721 CEL  
63-Microglia GSM258721 CEL  
62-MM-LPS-7h GSM268706 CEL  
61-MM-LPS-7h GSM268705 CEL  
60-MM-LPS-6h GSM258702 CEL  
59-MM-LPS-6h GSM258701 CEL  
58-MM-LPS-6h GSM258699 CEL  
57-MM-LPS-6h GSM258699 CEL  
56-BM-LPS-6h GSM258694 CEL  
55-BM-LPS-6h GSM258694 CEL  
54-BM-LPS-6h GSM258694 CEL  
53-Ismacryoid-DC GSM258650 CEL  
52-Ismacryoid-DC GSM258649 CEL  
51-CD8a-DC GSM258648 CEL  
50-CD8a-DC GSM258647 CEL  
49-CD8a+DC GSM258646 CEL  
48-CD8a+DC GSM258645 CEL  
47-NK-cells GSM258732 CEL  
46-NK-cells GSM258731 CEL  
45-Mast-cells-IgE+Ad GSM258718 CEL  
44-Mast-cells-IgE+Ad GSM258717 CEL  
43-Mast-cells-IgE GSM258714 CEL  
42-Mast-cells-IgE GSM258713 CEL  
41-Mast-cells GSM258712 CEL  
40-Granulocytes GSM258667 CEL  
39-Granulocytes GSM258667 CEL  
38-GMP GSM258666 CEL  
37-GMP GSM258665 CEL  
36-GMP GSM258665 CEL  
35-GMP GSM258642 CEL  
34-GMP GSM258642 CEL  
33-MEP GSM258720 CEL  
32-MEP GSM258719 CEL  
31-HSC GSM258770 CEL  
30-HSC GSM258769 CEL  
29-Bone marrow GSM258628 CEL  
28-Bone marrow GSM258627 CEL  
27-paneth-cells-GE GSM116358 CEL  
26-paneth-cells-GE GSM116357 CEL  
25-paneth-cells GSM116350 CEL  
24-paneth-cells GSM116359 CEL  
23-paneth-cells GSM318589 CEL  
22-paneth-cells GSM318590 CEL  
21-CD9 GSM480375 cel  
20-CD9 GSM480374 cel  
19-CD9 GSM480363 cel  
18-CD9 GSM480362 cel  
17-CD9 GSM349880 CEL  
16-CD9 GSM350375 CEL  
15-CD9 GSM350376 CEL  
14-Intestine-epithelium RMINEP002901 CEL  
13-Intestine-epithelium RMINEP001001 CEL  
12-Intestine-epithelium RMINEP001001 CEL  
11-FAE RMPYEP002001 CEL  
10-FAE RMPYEP001001 CEL  
09-Ileum-IEC GSM190797 CEL  
08-Ileum-IEC GSM190796 CEL  
07-Ileum-IEC GSM190795 CEL  
06-CT-v-M-cells GSM190794 CEL  
05-CT-v-M-cells GSM190793 CEL  
04-CT-v-M-cells GSM190792 CEL  
03-PP-M-cells GSM190790 CEL  
02-PP-M-cells GSM190789 CEL  
01-PP-M-cells GSM190789 CEL



Cluster0100\_High in astrocytes & NALT (20 nodes)

1,035.1  
980.6  
926.1  
871.7  
817.2  
762.7  
708.2  
653.7  
599.3  
544.8  
490.3  
435.8  
381.4  
326.9  
272.4  
217.9  
163.4  
109  
54.5  
0

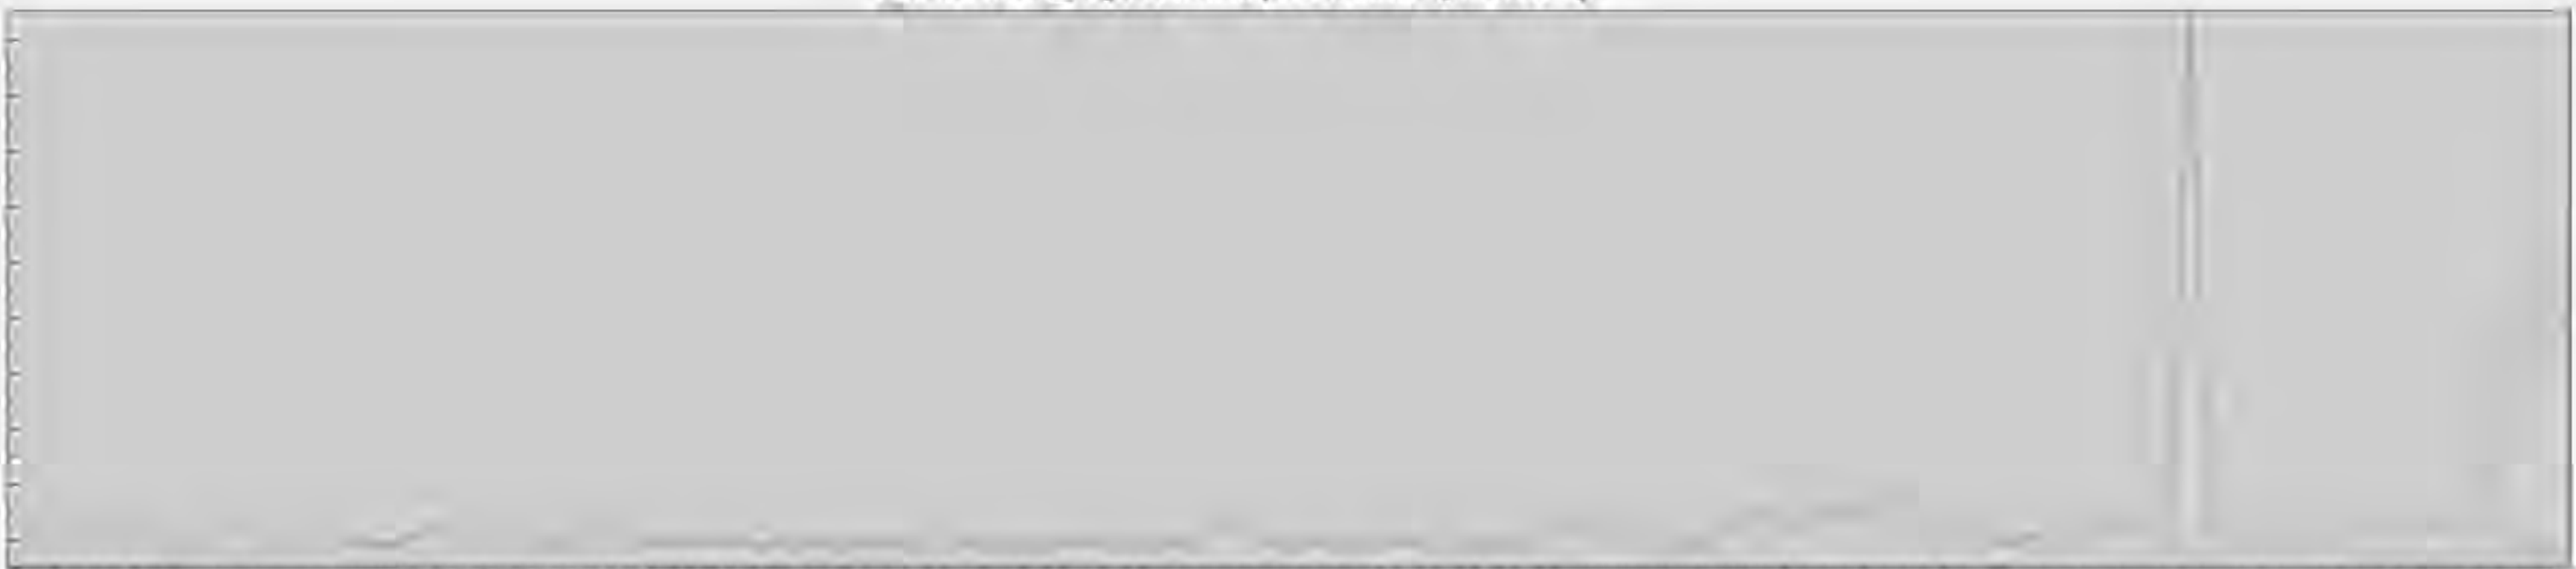

|     |                            |              |     |
|-----|----------------------------|--------------|-----|
| 30  | NALT                       | GSM2899411   | CEL |
| 129 | NALT                       | GSM2899410   | CEL |
| 128 | NALT                       | GSM2899409   | CEL |
| 127 | NALT                       | GSM2899408   | CEL |
| 126 | Colon-d9                   | GSM1988104   | CEL |
| 125 | Colon-d9                   | GSM1988103   | CEL |
| 124 | Colon-d9                   | GSM1988102   | CEL |
| 123 | Colon-d4                   | GSM1988101   | CEL |
| 122 | Colon-d4                   | GSM1988100   | CEL |
| 121 | Intestine-large            | GSM258676    | CEL |
| 120 | Intestine-large            | GSM258675    | CEL |
| 119 | Intestine-small            | GSM258674    | CEL |
| 118 | Intestine-small            | GSM258673    | CEL |
| 117 | Lymph-nodes                | GSM258672    | CEL |
| 116 | Spleen                     | GSM258671    | CEL |
| 115 | Spleen                     | GSM258670    | CEL |
| 114 | Neuro2a                    | GSM258669    | CEL |
| 113 | Neuro2a                    | GSM258668    | CEL |
| 112 | Astrocytes                 | GSM2418998   | CEL |
| 111 | ming                       | GSM258726    | CEL |
| 110 | ming                       | GSM258725    | CEL |
| 109 | ming                       | GSM258724    | CEL |
| 108 | MIMCD3                     | GSM258723    | CEL |
| 107 | MIMCD3                     | GSM258722    | CEL |
| 106 | Bruce4                     | GSM258665    | CEL |
| 105 | Bruce4                     | GSM258664    | CEL |
| 104 | C2C12                      | GSM258663    | CEL |
| 103 | C2C12                      | GSM258662    | CEL |
| 102 | NH3T3                      | GSM258730    | CEL |
| 101 | NH3T3                      | GSM258729    | CEL |
| 100 | 3T3-L1                     | GSM258610    | CEL |
| 99  | 3T3-L1                     | GSM258609    | CEL |
| 98  | 10T12                      | GSM258632    | CEL |
| 97  | 10T12                      | GSM258631    | CEL |
| 96  | Osteoblast-d21             | GSM258740    | CEL |
| 95  | Osteoblast-d14             | GSM258738    | CEL |
| 94  | Osteoblast-d14             | GSM258737    | CEL |
| 93  | Osteoblast-d5              | GSM258742    | CEL |
| 92  | Osteoblast-d5              | GSM258741    | CEL |
| 91  | Chondrocytes               | GSM258674    | CEL |
| 90  | Chondrocytes               | GSM258674    | CEL |
| 89  | Nat Helper cell            | GSM465594    | CEL |
| 88  | Nat Helper cell            | GSM465593    | CEL |
| 87  | Nat Helper cell            | GSM465593    | CEL |
| 86  | T cell                     | GSM465596    | CEL |
| 85  | MS-1                       | GSM234692    | CEL |
| 84  | Lymph-endc-cells           | GSM143704    | CEL |
| 83  | PP-FDC                     | GSM481977    | CEL |
| 82  | PP-FDC                     | GSM481978    | CEL |
| 81  | PP-FDC                     | GSM481976    | CEL |
| 80  | E-LY                       | RMLNDC003001 | CEL |
| 79  | E-LY                       | RMLNDC003001 | CEL |
| 78  | Follicular-Bcells          | GSM258664    | CEL |
| 77  | Follicular-Bcells          | GSM258663    | CEL |
| 76  | MZ-Bcell                   | GSM258622    | CEL |
| 75  | MZ-Bcell                   | GSM258621    | CEL |
| 74  | BAF3                       | GSM258620    | CEL |
| 73  | BAF3                       | GSM258619    | CEL |
| 72  | Tregs                      | GSM258778    | CEL |
| 71  | T-cells-CD8+               | GSM258777    | CEL |
| 70  | T-cells-CD8+               | GSM258776    | CEL |
| 69  | T-cells-CD4+               | GSM258774    | CEL |
| 68  | T-cells-CD4+               | GSM258773    | CEL |
| 67  | T-cells-CD4+               | GSM258744    | CEL |
| 66  | Thymocyte-DN               | GSM465595    | CEL |
| 65  | Osteoclasts                | GSM258743    | CEL |
| 64  | Microglia                  | GSM258721    | CEL |
| 63  | Microglia                  | GSM258721    | CEL |
| 62  | MM-LPS-7h                  | GSM258706    | CEL |
| 61  | MM-LPS-7h                  | GSM258705    | CEL |
| 60  | MM-LPS-6h                  | GSM258702    | CEL |
| 59  | MM-LPS-6h                  | GSM258702    | CEL |
| 58  | MM-LPS-6h                  | GSM258699    | CEL |
| 57  | MM-LPS-6h                  | GSM258699    | CEL |
| 56  | MM-LPS-6h                  | GSM258694    | CEL |
| 55  | MM-LPS-6h                  | GSM258694    | CEL |
| 54  | MM-LPS-6h                  | GSM258694    | CEL |
| 53  | MM-LPS-6h                  | GSM258694    | CEL |
| 52  | MM-LPS-6h                  | GSM258694    | CEL |
| 51  | MM-LPS-6h                  | GSM258694    | CEL |
| 50  | CD8a-DC                    | GSM258647    | CEL |
| 49  | CD8a-DC                    | GSM258647    | CEL |
| 48  | CD8a+DC                    | GSM258646    | CEL |
| 47  | NK-cells                   | GSM258732    | CEL |
| 46  | NK-cells                   | GSM258731    | CEL |
| 45  | Mast-cells-IgE+Ad          | GSM258718    | CEL |
| 44  | Mast-cells-IgE+Ad          | GSM258717    | CEL |
| 43  | Mast-cells-IgE             | GSM258714    | CEL |
| 42  | Mast-cells-IgE             | GSM258713    | CEL |
| 41  | Mast-cells                 | GSM258712    | CEL |
| 40  | Granulocytes               | GSM258667    | CEL |
| 39  | Granulocytes               | GSM258667    | CEL |
| 38  | GMP                        | GSM258665    | CEL |
| 37  | GMP                        | GSM258665    | CEL |
| 36  | GMP                        | GSM258664    | CEL |
| 35  | GMP                        | GSM258664    | CEL |
| 34  | GMP                        | GSM258664    | CEL |
| 33  | MIEP                       | GSM258720    | CEL |
| 32  | MIEP                       | GSM258719    | CEL |
| 31  | HESC                       | GSM258770    | CEL |
| 30  | HESC                       | GSM258769    | CEL |
| 29  | Bone marrow                | GSM258628    | CEL |
| 28  | Bone marrow                | GSM258627    | CEL |
| 27  | paneth-cells-GF-1          | GSM116358    | CEL |
| 26  | paneth-cells-GF-1          | GSM116357    | CEL |
| 25  | paneth-cells               | GSM116350    | CEL |
| 24  | paneth-cells               | GSM116359    | CEL |
| 23  | paneth-cells               | GSM318589    | CEL |
| 22  | paneth-cells               | GSM318590    | CEL |
| 21  | Colon-Crypt                | GSM480375    | CEL |
| 20  | Colon-Crypt                | GSM480374    | CEL |
| 19  | Colon-Vill                 | GSM480363    | CEL |
| 18  | Colon-Vill                 | GSM480362    | CEL |
| 17  | Colon-IEC-Gf               | GSM349880    | CEL |
| 16  | Colon-IEC-Gf               | GSM350375    | CEL |
| 15  | Ileum-IEC                  | GSM350376    | CEL |
| 14  | Ileum-IEC                  | GSM350371    | CEL |
| 13  | Small-intestine-epithelium | RMINEP002001 | CEL |
| 12  | Small-intestine-epithelium | RMINEP001001 | CEL |
| 11  | FAE                        | RMPYEP001001 | CEL |
| 10  | FAE                        | RMPYEP001001 | CEL |
| 09  | Ileum-IEC                  | GSM190797    | CEL |
| 08  | Ileum-IEC                  | GSM190796    | CEL |
| 07  | Ileum-IEC                  | GSM190795    | CEL |
| 06  | CT-v-M-cells               | GSM190794    | CEL |
| 05  | CT-v-M-cells               | GSM190793    | CEL |
| 04  | CT-y-M-cells               | GSM190792    | CEL |
| 03  | PP-M-cells                 | GSM190791    | CEL |
| 02  | PP-M-cells                 | GSM190790    | CEL |
| 01  | PP-M-cells                 | GSM190789    | CEL |







Cluster0102\_Uncertain (18 nodes)

2,524.5  
2,391.7  
2,258.8  
2,125.9  
1,993.1  
1,860.2  
1,727.3  
1,594.4  
1,461.6  
1,328.7  
1,195.8  
1,063  
930.1  
797.2  
664.4  
531.5  
398.6  
265.7  
132.9  
0

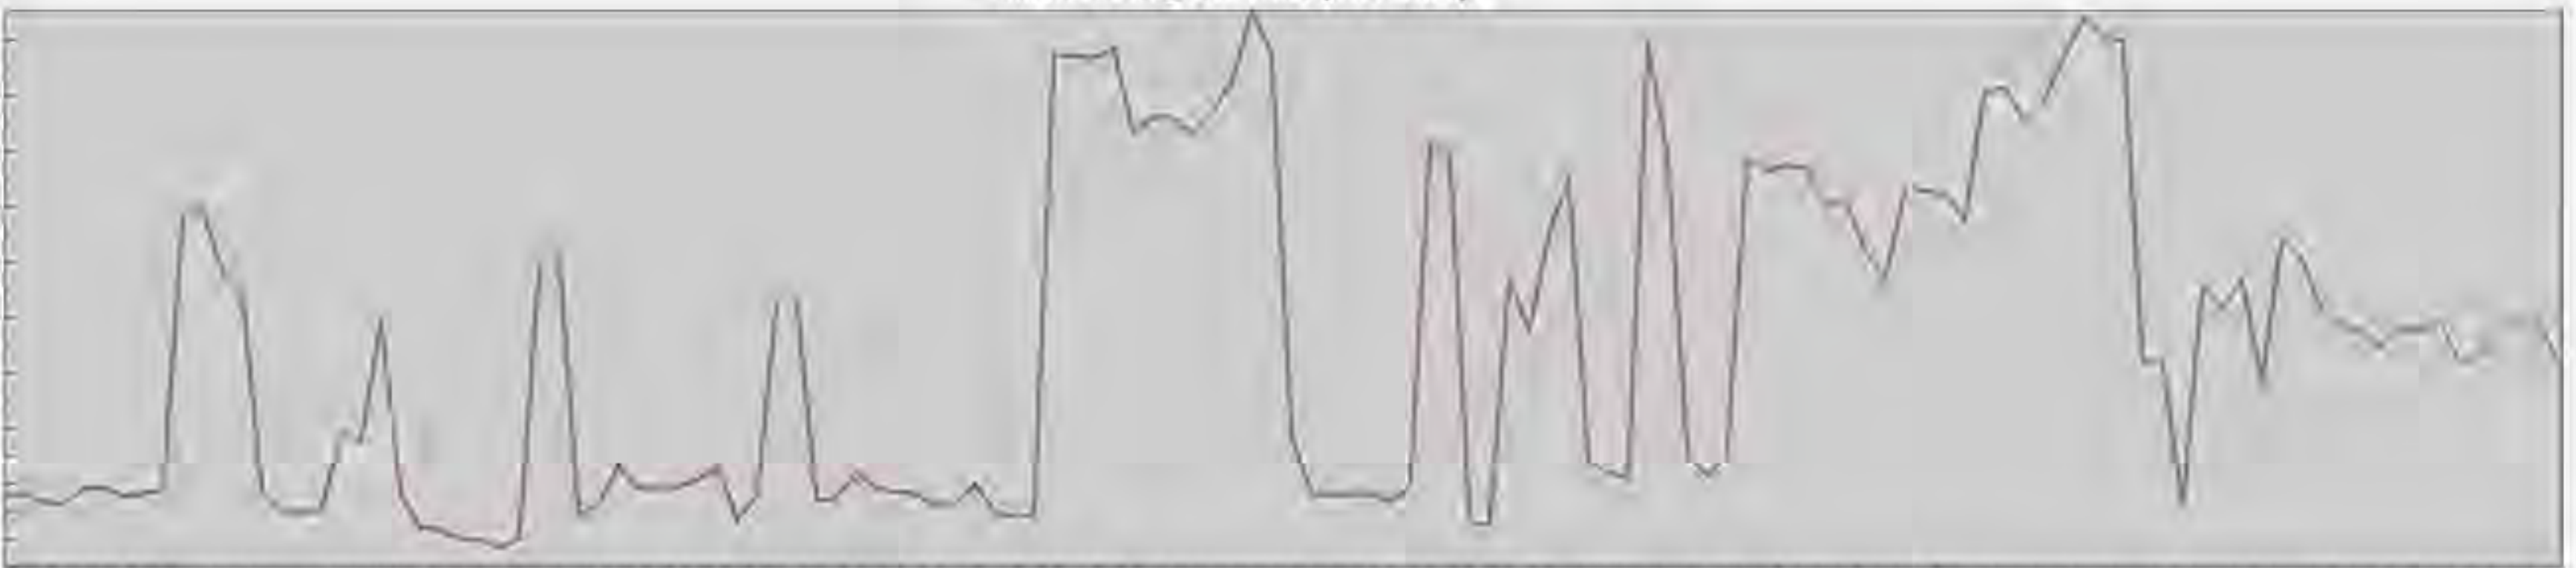

130-NALT GSM2894110.CEL  
129-NALT GSM289410.CEL  
128-NALT GSM289409.CEL  
127-NALT GSM289408.CEL  
126-Column-d9 GSM1988105.CEL  
125-Column-d9 GSM1988104.CEL  
124-Column-d9 GSM1988103.CEL  
123-Column-d4 GSM1988102.CEL  
122-Column-d4 GSM1988101.CEL  
121-Intestine-large GSM258676.CEL  
120-Intestine-large GSM258675.CEL  
119-Intestine-small GSM258678.CEL  
118-Intestine-small GSM258679.CEL  
117-Lymph-nodes GSM258691.CEL  
116-Lymph-nodes GSM258692.CEL  
115-Spleen GSM258767.CEL  
114-Spleen GSM258768.CEL  
113-Neuro2a GSM258728.CEL  
112-Neuro2a GSM258729.CEL  
111-Astrocytes GSM241898.CEL  
110-ming GSM258726.CEL  
109-ming GSM258725.CEL  
108-MIMCD3 GSM258724.CEL  
107-MIMCD3 GSM258723.CEL  
106-Bruce4 GSM258656.CEL  
105-Bruce4 GSM258655.CEL  
104-C2C12 GSM258690.CEL  
103-C2C12 GSM258689.CEL  
102-NH3T3 GSM258739.CEL  
101-NH3T3 GSM258738.CEL  
100-3T3-L1 GSM258610.CEL  
99-3T3-L1 GSM258609.CEL  
98-10T12 GSM258632.CEL  
97-10T12 GSM258631.CEL  
96-Osteoblast-d21 GSM258740.CEL  
95-Osteoblast-d21 GSM258739.CEL  
94-Osteoblast-d14 GSM258738.CEL  
93-Osteoblast-d14 GSM258737.CEL  
92-Osteoblast-d5 GSM258742.CEL  
91-Osteoblast-d5 GSM258741.CEL  
90-Chondrocytes GSM266741.CEL  
89-Chondrocytes GSM266740.CEL  
88-Nat Helper cell GSM465594.CEL  
87-Nat Helper cell GSM465593.CEL  
86-LT cell GSM465596.CEL  
85-MS-1 GSM234692.CEL  
84-Lymph-endc-cells GSM143704.CEL  
83-PP-FDC GSM481977.CEL  
82-PP-FDC GSM481978.CEL  
81-PP-FDC GSM481976.CEL  
80-L-Y RMLNDCC003001.CEL  
79-L-Y RMLNDCC003001.CEL  
78-Follicular-Bcells GSM258664.CEL  
77-Follicular-Bcells GSM258663.CEL  
76-MZ-Bcell GSM258622.CEL  
75-MZ-Bcell GSM258621.CEL  
74-BAF3 GSM258620.CEL  
73-BAF3 GSM258619.CEL  
72-Tregs GSM258778.CEL  
71-Tregs GSM258777.CEL  
70-T-cells-CD8+ GSM258776.CEL  
69-T-cells-CD8+ GSM258775.CEL  
68-T-cells-CD4+ GSM258774.CEL  
67-T-cells-CD4+ GSM258773.CEL  
66-Thymocyte-DN GSM465595.CEL  
65-Osteoclasts GSM258744.CEL  
64-Osteoclasts GSM258743.CEL  
63-Microglia GSM258721.CEL  
62-Microglia GSM258721.CEL  
61-PM-M-PS-7h GSM258706.CEL  
60-PM-M-PS-7h GSM258705.CEL  
59-PM-M-PS-7h GSM258702.CEL  
58-PM-M-PS-6h GSM258701.CEL  
57-PM-M-PS-6h GSM258699.CEL  
56-PM-M-PS-6h GSM258699.CEL  
55-BMM GSM258694.CEL  
54-BMM GSM258694.CEL  
53-Plasmacytoid-DC GSM258650.CEL  
52-Plasmacytoid-DC GSM258649.CEL  
51-CD8a-DC GSM258648.CEL  
50-CD8a-DC GSM258647.CEL  
49-CD8a+DC GSM258646.CEL  
48-CD8a+DC GSM258645.CEL  
47-NK-cells GSM258732.CEL  
46-NK-cells GSM258731.CEL  
45-Mast-cells-IgE+Ad GSM258718.CEL  
44-Mast-cells-IgE+Ad GSM258717.CEL  
43-Mast-cells-IgE GSM258714.CEL  
42-Mast-cells-IgE GSM258713.CEL  
41-Mast-cells GSM258712.CEL  
40-Granulocytes GSM258711.CEL  
39-Granulocytes GSM258668.CEL  
38-Granulocytes GSM258667.CEL  
37-GMP GSM258666.CEL  
36-GMP GSM258665.CEL  
35-GMP GSM258642.CEL  
34-GMP GSM258641.CEL  
33-MEP GSM258720.CEL  
32-MEP GSM258719.CEL  
31-HESC GSM258770.CEL  
30-HESC GSM258769.CEL  
29-Bone marrow GSM258628.CEL  
28-Bone marrow GSM258627.CEL  
27-Paneth-cells-GE GSM116358.CEL  
26-Paneth-cells-GE GSM116357.CEL  
25-Paneth-cells GSM116350.CEL  
24-Paneth-cells GSM116359.CEL  
23-Paneth-cells GSM318589.CEL  
22-Paneth-cells GSM318590.CEL  
21-Column-Crypt GSM480375.CEL  
20-Column-Crypt GSM480374.CEL  
19-Column-Vill GSM480363.CEL  
18-Column-Vill GSM480362.CEL  
17-Column-IEC-GE GSM349880.CEL  
16-Column-IEC-GE GSM350375.CEL  
15-Ileum-IEC GSM350376.CEL  
14-Ileum-IEC GSM350371.CEL  
13-Small-intestine-epithelium RMINEP002901.CEL  
12-Small-intestine-epithelium RMINEP001001.CEL  
11-FAE RMPYEP002001.CEL  
10-FAE RMPYEP001001.CEL  
09-Ileum-IEC GSM190797.CEL  
08-Ileum-IEC GSM190796.CEL  
07-Ileum-IEC GSM190795.CEL  
06-CT-v-M-cells GSM190794.CEL  
05-CT-v-M-cells GSM190793.CEL  
04-CT-v-M-cells GSM190792.CEL  
03-PP-M-cells GSM190791.CEL  
02-PP-M-cells GSM190790.CEL  
01-PP-M-cells GSM190789.CEL



Cluster0103\_Uncertain (18 nodes)

871.2  
825.4  
779.5  
733.6  
687.8  
641.9  
596.1  
550.2  
504.4  
458.5  
412.7  
366.8  
321  
275.1  
229.3  
183.4  
137.6  
91.7  
45.9  
0

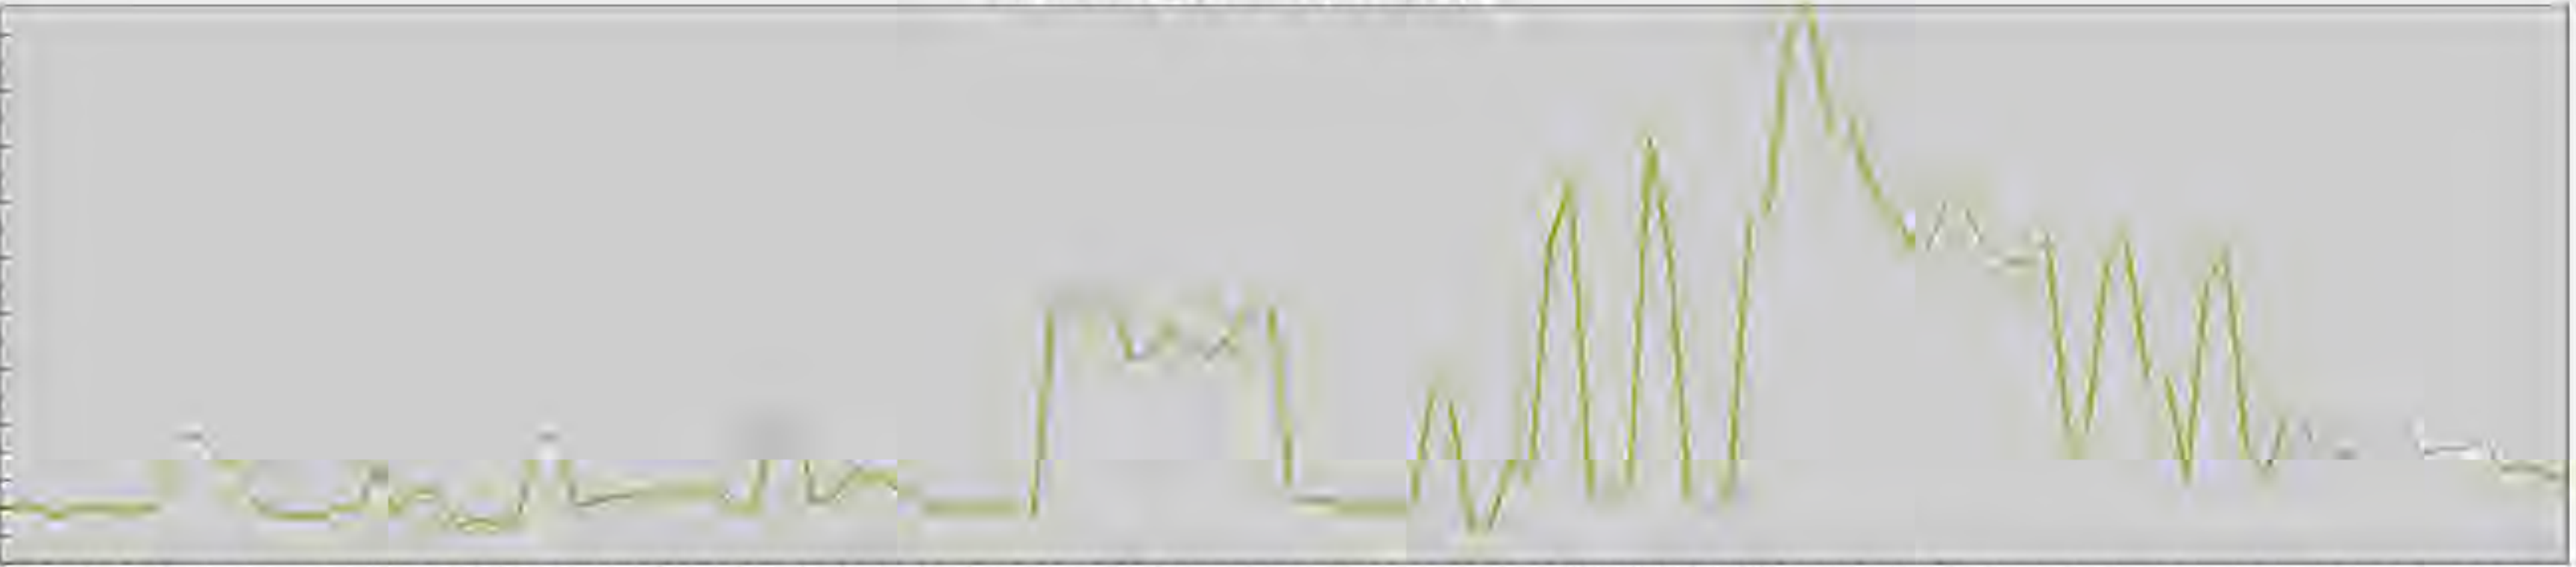

130-NALT GSM289411.CEL  
129-NALT GSM289410.CEL  
128-NALT GSM289409.CEL  
127-NALT GSM289408.CEL  
126-Column-d9 GSM1988105.CEL  
125-Column-d9 GSM1988104.CEL  
124-Column-d9 GSM1988103.CEL  
123-Column-d4 GSM1988102.CEL  
122-Column-d4 GSM1988101.CEL  
121-Intestine-large GSM258676.CEL  
120-Intestine-large GSM258675.CEL  
119-Intestine-small GSM258678.CEL  
118-Intestine-small GSM258677.CEL  
117-Lymph-nodes GSM258691.CEL  
116-Lymph-nodes GSM258726.CEL  
115-Spleen GSM258768.CEL  
114-Spleen GSM258767.CEL  
113-Neuro2a GSM258728.CEL  
112-Neuro2a GSM258727.CEL  
111-Astrocytes GSM241898.CEL  
110-mim6 GSM258725.CEL  
109-mim6 GSM258724.CEL  
108-MIMCD3 GSM258723.CEL  
107-MIMCD3 GSM258722.CEL  
106-Bruce4 GSM258656.CEL  
105-Bruce4 GSM258655.CEL  
104-C2C12 GSM258690.CEL  
103-C2C12 GSM258689.CEL  
102-NH3T3 GSM258730.CEL  
101-NH3T3 GSM258729.CEL  
100-3T3-L1 GSM258610.CEL  
99-3T3-L1 GSM258609.CEL  
98-10T12 GSM258631.CEL  
97-10T12 GSM258630.CEL  
96-Osteoblast-d21 GSM258740.CEL  
95-Osteoblast-d21 GSM258739.CEL  
94-Osteoblast-d14 GSM258738.CEL  
93-Osteoblast-d14 GSM258737.CEL  
92-Osteoblast-d5 GSM258742.CEL  
91-Osteoblast-d5 GSM258741.CEL  
90-Chondrocytes GSM266741.CEL  
89-Chondrocytes GSM266740.CEL  
88-Nat Helper cell GSM465594.CEL  
87-Nat Helper cell GSM465593.CEL  
86-TT cell GSM465596.CEL  
85-MS-1 GSM234692.CEL  
84-Lymph-endo-cells GSM143704.CEL  
83-PP-FDC GSM481977.CEL  
82-PP-FDC GSM481978.CEL  
81-PP-FDC GSM481976.CEL  
80-F-L-Y RMLNDCC003001.CEL  
79-F-L-Y RMLNDCC003001.CEL  
78-Follicular-Bcells GSM258664.CEL  
77-Follicular-Bcells GSM258663.CEL  
76-MZ-Bcell GSM258627.CEL  
75-MZ-Bcell GSM258621.CEL  
74-BAF3 GSM258620.CEL  
73-BAF3 GSM258619.CEL  
72-Tregs GSM258778.CEL  
71-Tregs GSM258777.CEL  
70-T-cells-CD8+ GSM258776.CEL  
69-T-cells-CD8+ GSM258774.CEL  
68-T-cells-CD4+ GSM258773.CEL  
67-T-cells-CD4+ GSM258773.CEL  
66-Thymocyte-DN GSM465595.CEL  
65-Osteoclasts GSM258743.CEL  
64-Osteoclasts GSM258744.CEL  
63-Microglia GSM258721.CEL  
62-Microglia GSM258721.CEL  
61-PM-M-LPS-7h GSM258706.CEL  
60-PM-M-LPS-7h GSM258705.CEL  
59-PM-M-LPS-7d GSM258702.CEL  
58-PM-M-LPS-6h GSM258701.CEL  
57-PM-M-LPS-6h GSM258699.CEL  
56-PM-M-LPS-6h GSM258699.CEL  
55-PM-M-LPS-6h GSM258699.CEL  
54-PM-M-LPS-6h GSM258699.CEL  
53-PM-M-LPS-6h GSM258699.CEL  
52-PM-M-LPS-6h GSM258699.CEL  
51-PM-M-LPS-6h GSM258699.CEL  
50-CD8a-DC GSM258647.CEL  
49-CD8a-DC GSM258646.CEL  
48-CD8a+DC GSM258646.CEL  
47-NK-cells GSM258732.CEL  
46-NK-cells GSM258731.CEL  
45-Mast-cells-IgE+Ad GSM258718.CEL  
44-Mast-cells-IgE+Ad GSM258717.CEL  
43-Mast-cells-IgE GSM258714.CEL  
42-Mast-cells-IgE GSM258713.CEL  
41-Mast-cells GSM258712.CEL  
40-Granulocytes GSM258668.CEL  
39-Granulocytes GSM258667.CEL  
38-GMP GSM258666.CEL  
37-GMP GSM258665.CEL  
36-GMP GSM258664.CEL  
35-GMP GSM258642.CEL  
34-GMP GSM258641.CEL  
33-MEP GSM258720.CEL  
32-MEP GSM258719.CEL  
31-HESC GSM258770.CEL  
30-HESC GSM258769.CEL  
29-Bone marrow GSM258628.CEL  
28-Bone marrow GSM258627.CEL  
27-paneth-cells-GF GSM116358.CEL  
26-paneth-cells-GF-1 GSM116357.CEL  
25-paneth-cells GSM116350.CEL  
24-paneth-cells GSM116359.CEL  
23-paneth-cells GSM318589.CEL  
22-paneth-cells GSM318590.CEL  
21-Column-Crypt GSM480375.CEL  
20-Column-Crypt GSM480374.CEL  
19-Column-Vill GSM480363.CEL  
18-Column-Vill GSM480362.CEL  
17-Column-IEC-GF GSM349880.CEL  
16-Column-IEC-GF GSM350375.CEL  
15-Ileum-IEC GSM350376.CEL  
14-Ileum-IEC GSM350371.CEL  
13-Small-intestine-epithelium RMINEP002001.CEL  
12-Small-intestine-epithelium RMINEP001001.CEL  
11-FAE RMPYEP002001.CEL  
10-FAE RMPYEP001001.CEL  
09-Ileum-IEC GSM190797.CEL  
08-Ileum-IEC GSM190796.CEL  
07-Ileum-IEC GSM190795.CEL  
06-CT-v-M-cells GSM190794.CEL  
05-CT-v-M-cells GSM190793.CEL  
04-PP-M-cells GSM190792.CEL  
03-PP-M-cells GSM190791.CEL  
02-PP-M-cells GSM190790.CEL  
01-PP-M-cells GSM190789.CEL



Cluster0104\_T cell-related (18 nodes)

4,642.7  
4,398.3  
4,154  
3,909.6  
3,665.3  
3,420.9  
3,176.6  
2,932.2  
2,687.9  
2,443.5  
2,199.2  
1,954.8  
1,710.5  
1,468.1  
1,221.8  
977.4  
733.1  
488.7  
244.4  
0

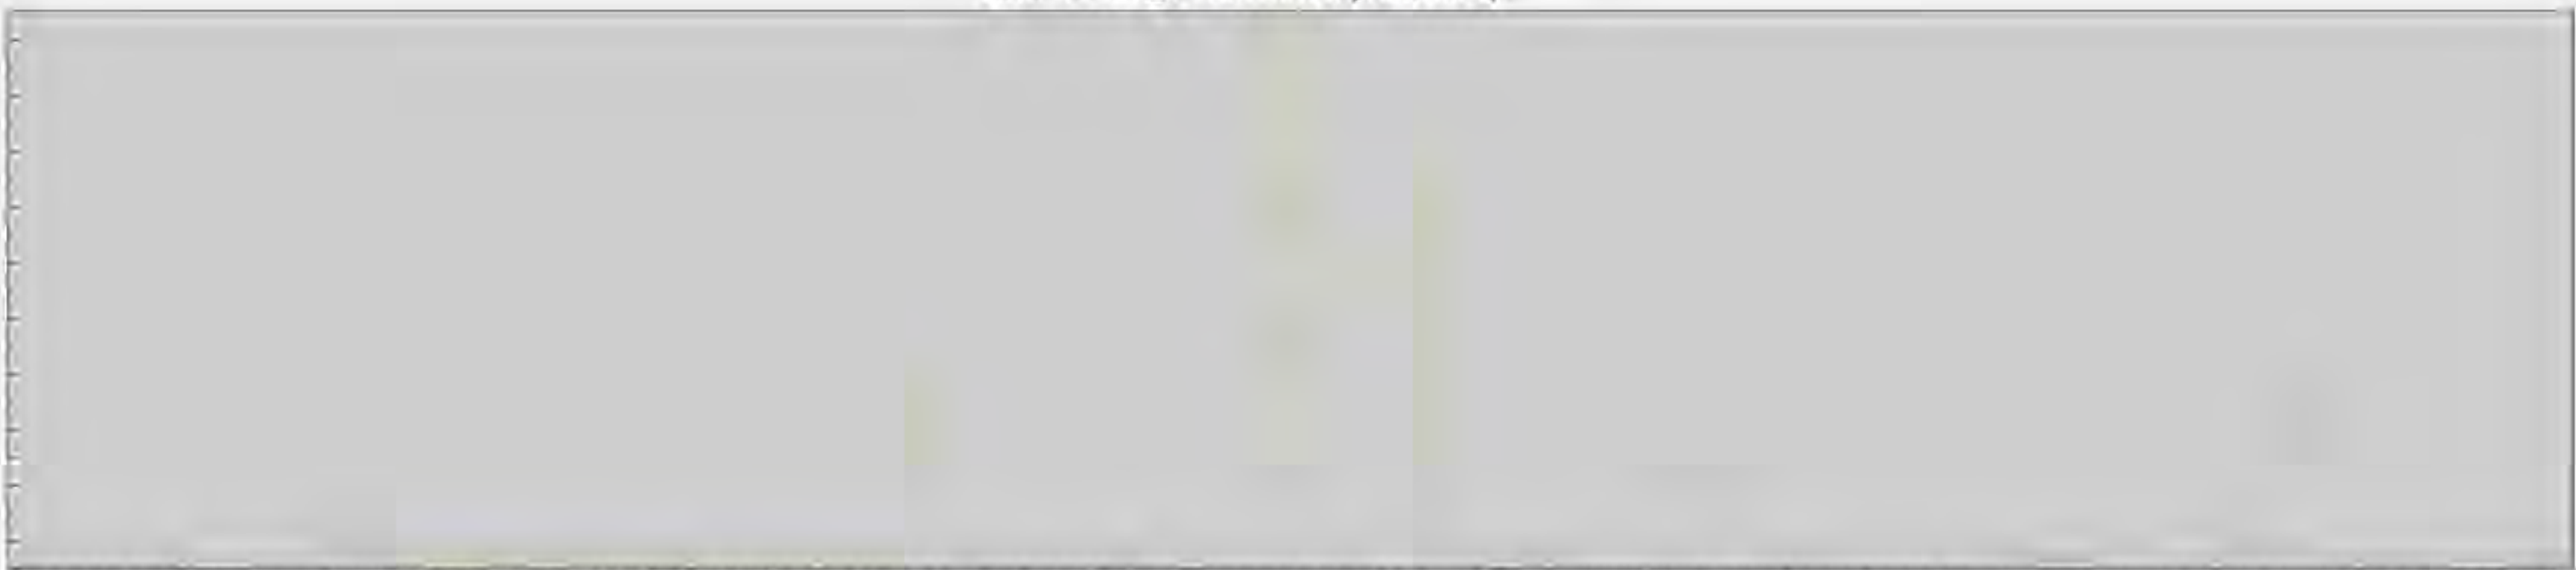

|     |                            |              |     |
|-----|----------------------------|--------------|-----|
| 01  | PP-M-cells                 | GSM190789    | CEL |
| 02  | PP-M-cells                 | GSM190790    | CEL |
| 03  | PP-M-cells                 | GSM190791    | CEL |
| 04  | CT-Y-M-cells               | GSM190792    | CEL |
| 05  | CT-Y-M-cells               | GSM190793    | CEL |
| 06  | CT-W-M-cells               | GSM190794    | CEL |
| 07  | Ileum-EC                   | GSM190795    | CEL |
| 08  | Ileum-EC                   | GSM190796    | CEL |
| 09  | Ileum-EC                   | GSM190797    | CEL |
| 10  | FAE-RMP                    | GSM190798    | CEL |
| 11  | FAE-RMP                    | GSM190799    | CEL |
| 12  | Small-intestine-epithelium | RMINEP001001 | CEL |
| 13  | Small-intestine-epithelium | RMINEP002001 | CEL |
| 14  | Ileum-EC                   | GSM350371    | CEL |
| 15  | Ileum-EC                   | GSM350375    | CEL |
| 16  | Colon-VIII                 | GSM480362    | cel |
| 17  | Colon-VIII                 | GSM480363    | cel |
| 18  | Colon-VIII                 | GSM480364    | cel |
| 19  | Colon-VIII                 | GSM480365    | cel |
| 20  | Colon-Crypt                | GSM480374    | cel |
| 21  | Colon-Crypt                | GSM480375    | cel |
| 22  | Paneth-cells               | GSM318589    | CEL |
| 23  | Paneth-cells               | GSM318590    | CEL |
| 24  | Paneth-cells               | GSM116359    | CEL |
| 25  | Paneth-cells               | GSM116359    | CEL |
| 26  | Paneth-cells               | GSM116359    | CEL |
| 27  | Paneth-cells               | GSM116357    | CEL |
| 28  | Paneth-cells               | GSM116358    | CEL |
| 29  | Bone marrow                | GSM258627    | CEL |
| 30  | HS                         | GSM258770    | CEL |
| 31  | HS                         | GSM258771    | CEL |
| 32  | MEP                        | GSM258772    | CEL |
| 33  | MEP                        | GSM258773    | CEL |
| 34  | MEP                        | GSM258774    | CEL |
| 35  | MEP                        | GSM258775    | CEL |
| 36  | GMP                        | GSM258665    | CEL |
| 37  | GMP                        | GSM258666    | CEL |
| 38  | GMP                        | GSM258667    | CEL |
| 39  | Granulocytes               | GSM258776    | CEL |
| 40  | Mast-cells                 | GSM258777    | CEL |
| 41  | Mast-cells                 | GSM258778    | CEL |
| 42  | Mast-cells                 | GSM258779    | CEL |
| 43  | Mast-cells                 | GSM258780    | CEL |
| 44  | Mast-cells                 | GSM258781    | CEL |
| 45  | Mast-cells                 | GSM258782    | CEL |
| 46  | NK-cells                   | GSM258783    | CEL |
| 47  | NK-cells                   | GSM258784    | CEL |
| 48  | CD8a+DC                    | GSM258646    | CEL |
| 49  | CD8a+DC                    | GSM258647    | CEL |
| 50  | CD8a+DC                    | GSM258648    | CEL |
| 51  | CD8a+DC                    | GSM258649    | CEL |
| 52  | CD8a+DC                    | GSM258650    | CEL |
| 53  | CD8a+DC                    | GSM258651    | CEL |
| 54  | CD8a+DC                    | GSM258652    | CEL |
| 55  | CD8a+DC                    | GSM258653    | CEL |
| 56  | CD8a+DC                    | GSM258654    | CEL |
| 57  | CD8a+DC                    | GSM258655    | CEL |
| 58  | CD8a+DC                    | GSM258656    | CEL |
| 59  | CD8a+DC                    | GSM258657    | CEL |
| 60  | CD8a+DC                    | GSM258658    | CEL |
| 61  | CD8a+DC                    | GSM258659    | CEL |
| 62  | Microglia                  | GSM258721    | CEL |
| 63  | Microglia                  | GSM258722    | CEL |
| 64  | Microglia                  | GSM258723    | CEL |
| 65  | Osteoclasts                | GSM258743    | CEL |
| 66  | Osteoclasts                | GSM258744    | CEL |
| 67  | T-cells-CD4+               | GSM258773    | CEL |
| 68  | T-cells-CD4+               | GSM258774    | CEL |
| 69  | T-cells-CD8+               | GSM258775    | CEL |
| 70  | T-cells-CD8+               | GSM258776    | CEL |
| 71  | Tregs                      | GSM258777    | CEL |
| 72  | Tregs                      | GSM258778    | CEL |
| 73  | Tregs                      | GSM258779    | CEL |
| 74  | BAF3                       | GSM258620    | CEL |
| 75  | MZ-Bcell                   | GSM258621    | CEL |
| 76  | MZ-Bcell                   | GSM258622    | CEL |
| 77  | Follicular-Bcells          | GSM258664    | CEL |
| 78  | Follicular-Bcells          | GSM258665    | CEL |
| 79  | F-LY                       | RMLNDC002001 | CEL |
| 80  | F-LY                       | RMLNDC003001 | CEL |
| 81  | PP-FDC                     | GSM481976    | CEL |
| 82  | PP-FDC                     | GSM481977    | CEL |
| 83  | PP-FDC                     | GSM481978    | CEL |
| 84  | Lymph-endo-cells           | GSM143704    | CEL |
| 85  | MS-1                       | GSM234692    | CEL |
| 86  | LT cell                    | GSM465596    | CEL |
| 87  | Nat Helper cell            | GSM465593    | CEL |
| 88  | Nat Helper cell            | GSM465594    | CEL |
| 89  | Chondrocytes               | GSM266741    | CEL |
| 90  | Osteoblast-d5              | GSM258741    | CEL |
| 91  | Osteoblast-d5              | GSM258742    | CEL |
| 92  | Osteoblast-d5              | GSM258743    | CEL |
| 93  | Osteoblast-d5              | GSM258744    | CEL |
| 94  | Osteoblast-d14             | GSM258737    | CEL |
| 95  | Osteoblast-d21             | GSM258738    | CEL |
| 96  | Osteoblast-d21             | GSM258739    | CEL |
| 97  | OT12                       | GSM258631    | CEL |
| 98  | OT12                       | GSM258632    | CEL |
| 99  | OT12                       | GSM258633    | CEL |
| 100 | 3T3-L1                     | GSM258610    | CEL |
| 101 | NH3T3                      | GSM258739    | CEL |
| 102 | NH3T3                      | GSM258739    | CEL |
| 103 | C2C12                      | GSM258629    | CEL |
| 104 | Bruce4                     | GSM258690    | CEL |
| 105 | Bruce4                     | GSM258691    | CEL |
| 106 | Bruce4                     | GSM258692    | CEL |
| 107 | MIMCD3                     | GSM258723    | CEL |
| 108 | MIMCD3                     | GSM258724    | CEL |
| 109 | mim6                       | GSM258725    | CEL |
| 110 | mim6                       | GSM258726    | CEL |
| 111 | Astrocytes                 | GSM241898    | CEL |
| 112 | Neuro2a                    | GSM258727    | CEL |
| 113 | Spleen                     | GSM258728    | CEL |
| 114 | Spleen                     | GSM258729    | CEL |
| 115 | Spleen                     | GSM258730    | CEL |
| 116 | Lymph-nodes                | GSM258691    | CEL |
| 117 | Lymph-nodes                | GSM258692    | CEL |
| 118 | Intestine-small            | GSM258677    | CEL |
| 119 | Intestine-large            | GSM258678    | CEL |
| 120 | Intestine-large            | GSM258679    | CEL |
| 121 | Intestine-large            | GSM258676    | CEL |
| 122 | Colon-d4                   | GSM198810    | CEL |
| 123 | Colon-d4                   | GSM198811    | CEL |
| 124 | Colon-d9                   | GSM198812    | CEL |
| 125 | Colon-d9                   | GSM198813    | CEL |
| 126 | NALT                       | GSM289408    | CEL |
| 127 | NALT                       | GSM289409    | CEL |
| 128 | NALT                       | GSM289410    | CEL |
| 129 | NALT                       | GSM289411    | CEL |



Cluster0105\_Low in Paneth cells (18 nodes)

142.2  
134.7  
127.2  
119.7  
112.2  
104.8  
97.3  
89.8  
82.3  
74.8  
67.3  
59.9  
52.4  
44.9  
37.4  
29.9  
22.4  
15  
7.5  
0

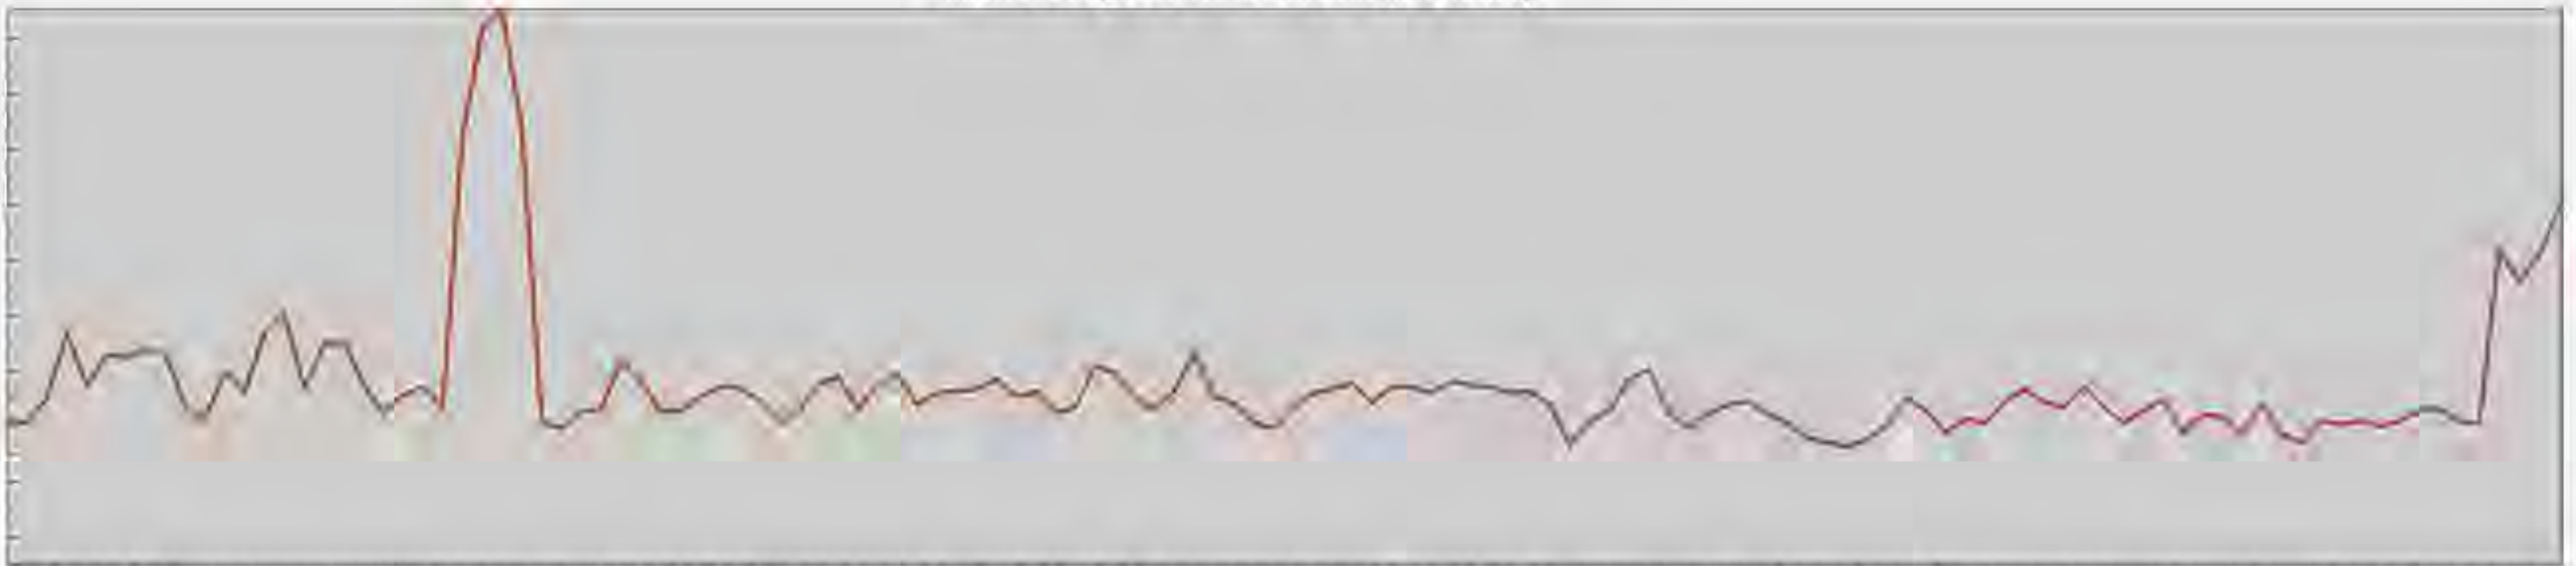

130-NALT GSM289411.CEL  
129-NALT GSM289410.CEL  
128-NALT GSM289409.CEL  
127-NALT GSM289408.CEL  
126-Column-d9 GSM1988105.CEL  
125-Column-d9 GSM1988104.CEL  
124-Column-d9 GSM1988103.CEL  
123-Column-d4 GSM1988102.CEL  
122-Column-d4 GSM1988101.CEL  
121-Intestine-large GSM258676.CEL  
120-Intestine-large GSM258675.CEL  
119-Intestine-small GSM258678.CEL  
118-Intestine-small GSM258692.CEL  
117-Lymph-nodes GSM258691.CEL  
116-Lymph-nodes GSM258726.CEL  
115-Spleen GSM258768.CEL  
114-Spleen GSM258767.CEL  
113-Neuro2a GSM258728.CEL  
112-Neuro2a GSM258727.CEL  
111-Astrocytes GSM241898.CEL  
110-mim6 GSM258725.CEL  
109-mim6 GSM258724.CEL  
108-MIMCD3 GSM258723.CEL  
107-MIMCD3 GSM258722.CEL  
106-Bruce4 GSM258656.CEL  
105-Bruce4 GSM258655.CEL  
104-C2C12 GSM258690.CEL  
103-C2C12 GSM258629.CEL  
102-NH3T3 GSM258739.CEL  
101-NH3T3 GSM258738.CEL  
100-3T3-L1 GSM258610.CEL  
99-3T3-L1 GSM258609.CEL  
98-10T12 GSM258632.CEL  
97-10T12 GSM258631.CEL  
96-Osteoblast-d21 GSM258740.CEL  
95-Osteoblast-d21 GSM258739.CEL  
94-Osteoblast-d14 GSM258738.CEL  
93-Osteoblast-d14 GSM258737.CEL  
92-Osteoblast-d5 GSM258742.CEL  
91-Osteoblast-d5 GSM258741.CEL  
90-Chondrocytes GSM266741.CEL  
89-Chondrocytes GSM266740.CEL  
88-Nat Helper cell GSM465594.CEL  
87-Nat Helper cell GSM465593.CEL  
86-TT cell GSM465596.CEL  
85-MS-1 GSM234692.CEL  
84-Lymph-endo-cells GSM143704.CEL  
83-PP-FDC GSM481977.CEL  
82-PP-FDC GSM481978.CEL  
81-PP-FDC GSM481976.CEL  
80-LY-RMLNDCC003001.CEL  
79-LY-RMLNDCC003001.CEL  
78-Follicular-Bcells GSM258664.CEL  
77-Follicular-Bcells GSM258663.CEL  
76-MZ-Bcell GSM258627.CEL  
75-MZ-Bcell GSM258621.CEL  
74-BAF3 GSM258620.CEL  
73-BAF3 GSM258619.CEL  
72-Tregs GSM258778.CEL  
71-Tregs GSM258777.CEL  
70-T-cells-CD8+ GSM258776.CEL  
69-T-cells-CD8+ GSM258775.CEL  
68-T-cells-CD4+ GSM258774.CEL  
67-T-cells-CD4+ GSM258773.CEL  
66-Thymocyte-DN GSM465595.CEL  
65-Osteoclasts GSM258744.CEL  
64-Osteoclasts GSM258743.CEL  
63-Microglia GSM258721.CEL  
62-Microglia GSM258721.CEL  
61-PM-M-PS-7h GSM258706.CEL  
60-PM-M-PS-7h GSM258705.CEL  
59-PM-M-PS-7d GSM258702.CEL  
58-PM-M-PS-6h GSM258701.CEL  
57-PM-M-PS-6h GSM258700.CEL  
56-PM-M-PS-6h GSM258699.CEL  
55-BMM-GSM258694.CEL  
54-BMM-GSM258693.CEL  
53-Plasmacytoid-DC GSM258650.CEL  
52-Plasmacytoid-DC GSM258649.CEL  
51-CD8a-DC GSM258648.CEL  
50-CD8a-DC GSM258647.CEL  
49-CD8a+DC GSM258646.CEL  
48-CD8a+DC GSM258645.CEL  
47-NK-cells GSM258732.CEL  
46-NK-cells GSM258731.CEL  
45-Mast-cells-IgE+Ad GSM258718.CEL  
44-Mast-cells-IgE+Ad GSM258717.CEL  
43-Mast-cells-IgE GSM258714.CEL  
42-Mast-cells-IgE GSM258713.CEL  
41-Mast-cells GSM258712.CEL  
40-Granulocytes GSM258668.CEL  
39-Granulocytes GSM258667.CEL  
38-GMP GSM258666.CEL  
37-GMP GSM258665.CEL  
36-GMP GSM258664.CEL  
35-CMP GSM258642.CEL  
34-CMP GSM258641.CEL  
33-MEP GSM258720.CEL  
32-MEP GSM258719.CEL  
31-HSC GSM258770.CEL  
30-HSC GSM258769.CEL  
29-Bone marrow GSM258628.CEL  
28-Bone marrow GSM258627.CEL  
27-Paneth-cells-GE GSM116358.CEL  
26-Paneth-cells-GE GSM116357.CEL  
25-Paneth-cells GSM116350.CEL  
24-Paneth-cells GSM116359.CEL  
23-Paneth-cells GSM318589.CEL  
22-Paneth-cells GSM318590.CEL  
21-Column-Crypt GSM480375.CEL  
20-Column-Crypt GSM480374.CEL  
19-Column-Vill GSM480363.CEL  
18-Column-Vill GSM480362.CEL  
17-Column-IEC-GE GSM349880.CEL  
16-Column-IEC-GE GSM350375.CEL  
15-Ileum-IEC-TGF GSM350376.CEL  
14-Ileum-IEC GSM350371.CEL  
13-Small-intestine-epithelium RMINEP002001.CEL  
12-Small-intestine-epithelium RMINEP001001.CEL  
11-FAE-RMPYEP002001.CEL  
10-FAE-RMPYEP001001.CEL  
09-Ileum-IEC GSM190797.CEL  
08-Ileum-IEC GSM190796.CEL  
07-Ileum-IEC GSM190795.CEL  
06-CT-v-M-cells GSM190794.CEL  
05-CT-v-M-cells GSM190793.CEL  
04-CT-v-M-cells GSM190792.CEL  
03-PP-M-cells GSM190791.CEL  
02-PP-M-cells GSM190790.CEL  
01-PP-M-cells GSM190789.CEL



Cluster0106\_Immunoglobulin-related (18 nodes)

2,642.2  
2,503.2  
2,364.1  
2,225  
2,086  
1,946.9  
1,807.8  
1,668.8  
1,529.7  
1,390.6  
1,251.6  
1,112.5  
973.5  
834.4  
695.3  
556.3  
417.2  
278.1  
139.1  
0

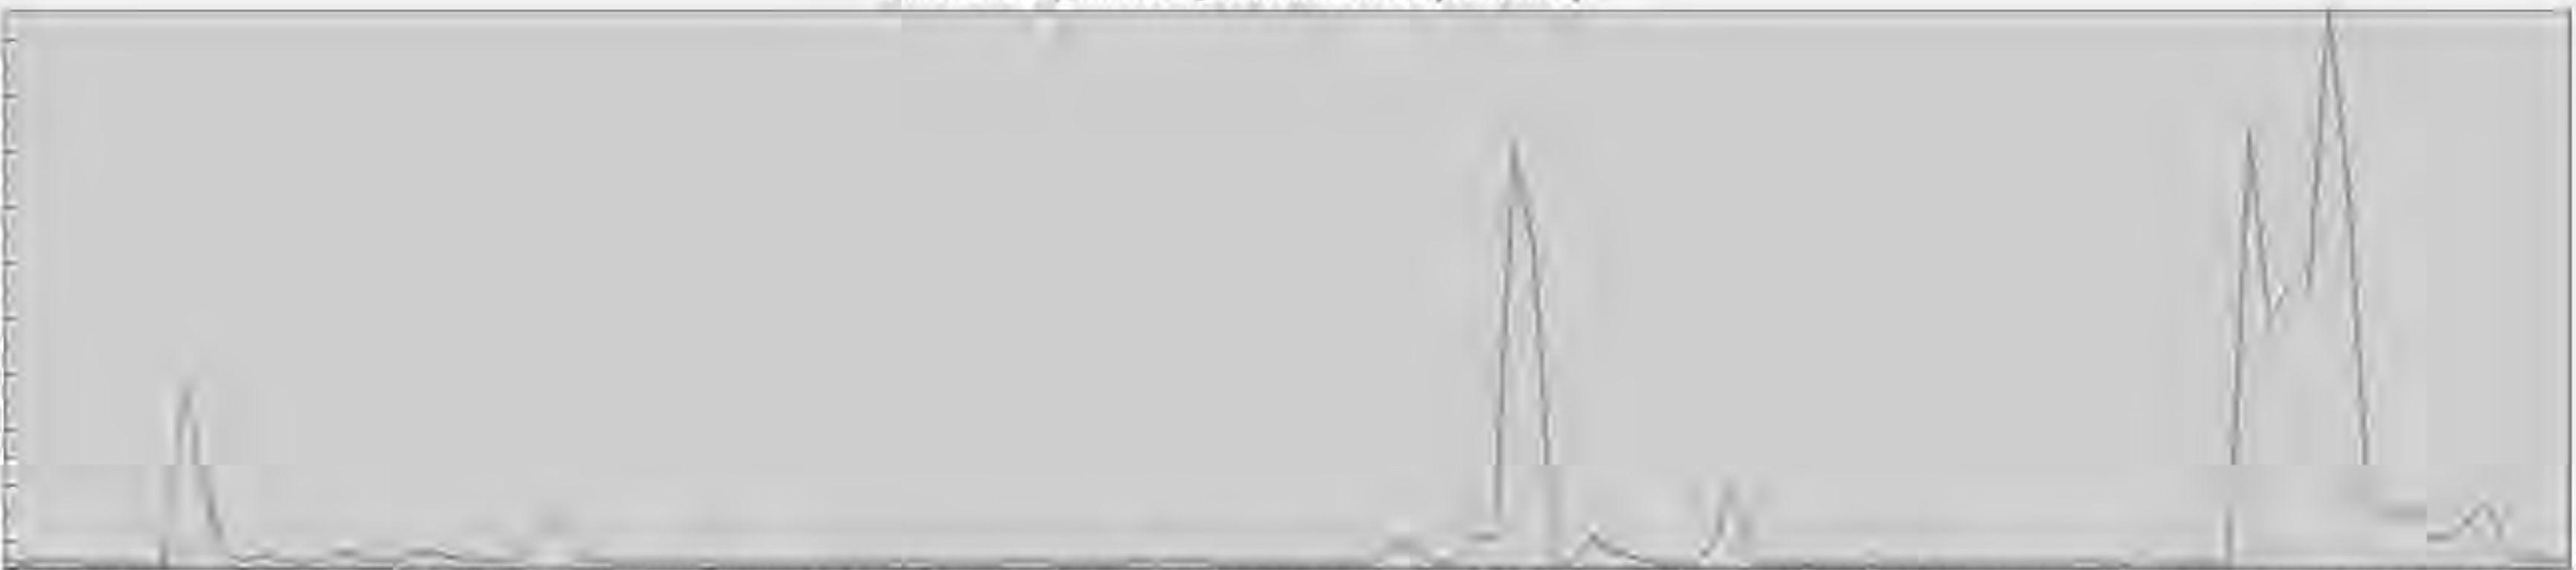

130-NALT GSM289411 CELL  
129-NALT GSM289410 CELL  
128-NALT GSM289409 CELL  
127-NALT GSM289408 CELL  
126-Color-d9 GSM1988105 CELL  
125-Color-d9 GSM1988104 CELL  
124-Color-d9 GSM1988103 CELL  
123-Color-d4 GSM1988102 CELL  
122-Color-d4 GSM1988101 CELL  
121-Intestine-large GSM258676 CELL  
120-Intestine-large GSM258675 CELL  
119-Intestine-small GSM258674 CELL  
118-Intestine-small GSM258673 CELL  
117-Lymph-nodes GSM258672 CELL  
116-Spleen GSM258768 CELL  
115-Spleen GSM258767 CELL  
114-Spleen GSM258766 CELL  
113-Neuro2a GSM258728 CELL  
112-Neuro2a GSM258727 CELL  
111-Astrocytes GSM241898 CELL  
110-mimb GSM258726 CELL  
109-mimb GSM258725 CELL  
108-MIMCD3 GSM258724 CELL  
107-MIMCD3 GSM258723 CELL  
106-Bruce4 GSM258656 CELL  
105-Bruce4 GSM258655 CELL  
104-C2C12 GSM258690 CELL  
103-C2C12 GSM258689 CELL  
102-NH3T3 GSM258739 CELL  
101-NH3T3 GSM258738 CELL  
100-3T3-L1 GSM258610 CELL  
99-3T3-L1 GSM258609 CELL  
98-10T1/2 GSM258632 CELL  
97-10T1/2 GSM258631 CELL  
96-Osteoblast-d21 GSM258740 CELL  
95-Osteoblast-d21 GSM258739 CELL  
94-Osteoblast-d14 GSM258738 CELL  
93-Osteoblast-d14 GSM258737 CELL  
92-Osteoblast-d5 GSM258742 CELL  
91-Osteoblast-d5 GSM258741 CELL  
90-Chondrocytes GSM266741 CELL  
89-Chondrocytes GSM266740 CELL  
88-Nat Helper cell GSM465594 CELL  
87-Nat Helper cell GSM465593 CELL  
86-T cell GSM465596 CELL  
85-MS-1 GSM234692 CELL  
84-Lymph-endo-cells GSM143704 CELL  
83-P-FDC GSM481977 CELL  
82-P-FDC GSM481978 CELL  
81-P-FDC GSM481976 CELL  
80-L-Y RMLNDCC003001 CELL  
79-L-Y RMLNDCC003001 CELL  
78-Follicular-Bcells GSM258664 CELL  
77-Follicular-Bcells GSM258663 CELL  
76-MZ-Bcell GSM258622 CELL  
75-MZ-Bcell GSM258621 CELL  
74-BAF3 GSM258620 CELL  
73-BAF3 GSM258619 CELL  
72-Tregs GSM258778 CELL  
71-Tregs GSM258777 CELL  
70-T-cells-CD8+ GSM258776 CELL  
69-T-cells-CD8+ GSM258774 CELL  
68-T-cells-CD4+ GSM258773 CELL  
67-T-cells-CD4+ GSM258773 CELL  
66-Thymocyte-DN GSM465595 CELL  
65-Osteoclasts GSM258743 CELL  
64-Osteoclasts GSM258743 CELL  
63-Microglia GSM258721 CELL  
62-Microglia GSM258721 CELL  
61-MM-LPS-7h GSM258706 CELL  
60-MM-LPS-7h GSM258706 CELL  
59-MM-LPS-6h GSM258702 CELL  
58-MM-LPS-6h GSM258702 CELL  
57-MM-LPS-6h GSM258699 CELL  
56-MM-LPS-6h GSM258699 CELL  
55-MM-LPS-6h GSM258694 CELL  
54-Plasmacytoid-DC GSM258650 CELL  
53-Plasmacytoid-DC GSM258649 CELL  
52-CD8a-DC GSM258648 CELL  
51-CD8a-DC GSM258647 CELL  
50-CD8a-DC GSM258647 CELL  
49-CD8a+DC GSM258646 CELL  
48-CD8a+DC GSM258646 CELL  
47-NK-cells GSM258732 CELL  
46-NK-cells GSM258731 CELL  
45-Mast-cells-IgE+Ad GSM258719 CELL  
44-Mast-cells-IgE+Ad GSM258717 CELL  
43-Mast-cells-IgE GSM258714 CELL  
42-Mast-cells-IgE GSM258713 CELL  
41-Mast-cells GSM258712 CELL  
40-Granulocytes GSM258668 CELL  
39-Granulocytes GSM258667 CELL  
38-GMP GSM258666 CELL  
37-GMP GSM258665 CELL  
36-GMP GSM258664 CELL  
35-CMP GSM258642 CELL  
34-MECP GSM258641 CELL  
33-MECP GSM258641 CELL  
32-MECP GSM258770 CELL  
31-HESC GSM258770 CELL  
30-Bone marrow GSM258628 CELL  
29-Bone marrow GSM258627 CELL  
28-Paneth-cells-GE GSM116358 CELL  
27-Paneth-cells-GE GSM116357 CELL  
26-Paneth-cells-GE GSM116350 CELL  
25-Paneth-cells GSM116359 CELL  
24-Paneth-cells GSM116359 CELL  
23-Paneth-cells GSM318589 CELL  
22-Paneth-cells GSM318590 CELL  
21-Color-Crypt GSM480375 CELL  
20-Color-Crypt GSM480374 CELL  
19-Color-Vill GSM480363 CELL  
18-Color-Vill GSM480362 CELL  
17-Color-IEC-GE GSM349880 CELL  
16-Color-IEC-GE GSM350375 CELL  
15-Ileum-IEC GSM350376 CELL  
14-Ileum-IEC GSM350371 CELL  
13-Small-intestine-epithelium RMINEP002901 CELL  
12-Small-intestine-epithelium RMINEP001001 CELL  
11-FAE-RMPYEP002001 CELL  
10-FAE-RMPYEP001001 CELL  
09-Ileum-IEC GSM190797 CELL  
08-Ileum-IEC GSM190796 CELL  
07-Ileum-IEC GSM190795 CELL  
06-CT-w-M-cells GSM190794 CELL  
05-CT-w-M-cells GSM190793 CELL  
04-CT-y-M-cells GSM190792 CELL  
03-PP-M-cells GSM190791 CELL  
02-PP-M-cells GSM190790 CELL  
01-PP-M-cells GSM190789 CELL



Cluster0107\_High in 3T3L1 cells (17 nodes)

1,821  
1,725.1  
1,629.3  
1,533.5  
1,437.6  
1,341.8  
1,245.9  
1,150.1  
1,054.3  
958.4  
862.6  
766.7  
670.9  
575  
479.2  
383.4  
287.5  
191.7  
95.8  
0

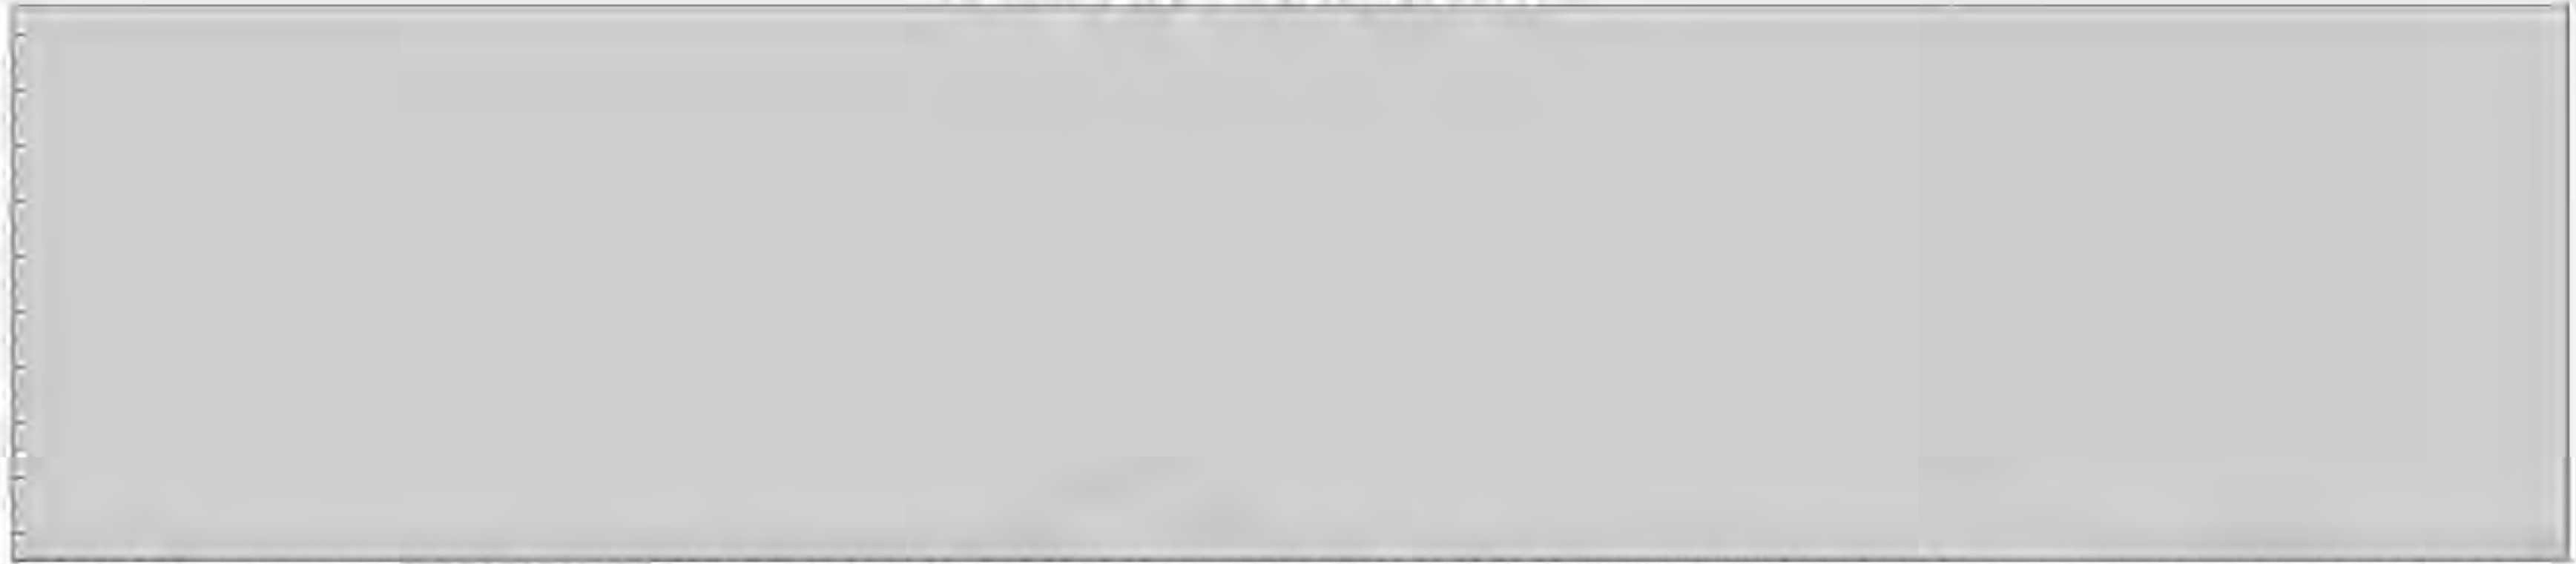

|    |                            |              |     |
|----|----------------------------|--------------|-----|
| 30 | NALT                       | GSM289411    | CEL |
| 29 | NALT                       | GSM289410    | CEL |
| 28 | NALT                       | GSM289409    | CEL |
| 27 | NALT                       | GSM289408    | CEL |
| 26 | Colon-d9                   | GSM1988104   | CEL |
| 25 | Colon-d9                   | GSM1988103   | CEL |
| 24 | Colon-d9                   | GSM1988102   | CEL |
| 23 | Colon-d4                   | GSM1988101   | CEL |
| 22 | Colon-d4                   | GSM1988100   | CEL |
| 21 | Intestine-large            | GSM258676    | CEL |
| 20 | Intestine-large            | GSM258675    | CEL |
| 19 | Intestine-small            | GSM258674    | CEL |
| 18 | Intestine-small            | GSM258673    | CEL |
| 17 | Lymph-nodes                | GSM258672    | CEL |
| 16 | Spleen                     | GSM258671    | CEL |
| 15 | Spleen                     | GSM258670    | CEL |
| 14 | Neuro2a                    | GSM241899    | CEL |
| 13 | Neuro2a                    | GSM241898    | CEL |
| 12 | Astrocytes                 | GSM241897    | CEL |
| 11 | Astrocytes                 | GSM241896    | CEL |
| 10 | ming                       | GSM258632    | CEL |
| 09 | ming                       | GSM258631    | CEL |
| 08 | MIMCD3                     | GSM258724    | CEL |
| 07 | MIMCD3                     | GSM258723    | CEL |
| 06 | Bruce4                     | GSM258656    | CEL |
| 05 | Bruce4                     | GSM258655    | CEL |
| 04 | C2C12                      | GSM258654    | CEL |
| 03 | C2C12                      | GSM258653    | CEL |
| 02 | NH3T3                      | GSM258739    | CEL |
| 01 | NH3T3                      | GSM258738    | CEL |
| 99 | 3T3-L1                     | GSM258610    | CEL |
| 98 | 3T3-L1                     | GSM258609    | CEL |
| 97 | 10T12                      | GSM258632    | CEL |
| 96 | Osteoblast-d21             | GSM258740    | CEL |
| 95 | Osteoblast-d14             | GSM258739    | CEL |
| 94 | Osteoblast-d14             | GSM258738    | CEL |
| 93 | Osteoblast-d5              | GSM258742    | CEL |
| 92 | Osteoblast-d5              | GSM258741    | CEL |
| 91 | Chondrocytes               | GSM266741    | CEL |
| 90 | Chondrocytes               | GSM266740    | CEL |
| 89 | Nat Helper cell            | GSM465594    | CEL |
| 88 | Nat Helper cell            | GSM465593    | CEL |
| 87 | IT cell                    | GSM465596    | CEL |
| 86 | MS-1                       | GSM234692    | CEL |
| 85 | MS-1                       | GSM234691    | CEL |
| 84 | Lymph-endo-cells           | GSM143704    | CEL |
| 83 | PP-FDC                     | GSM481977    | CEL |
| 82 | PP-FDC                     | GSM481978    | CEL |
| 81 | PP-FDC                     | GSM481979    | CEL |
| 80 | E-L                        | RMLNDC003001 | CEL |
| 79 | E-L                        | RMLNDC003001 | CEL |
| 78 | Follicular-B-cells         | GSM258654    | CEL |
| 77 | Follicular-B-cells         | GSM258653    | CEL |
| 76 | MZ-Bcell                   | GSM258622    | CEL |
| 75 | MZ-Bcell                   | GSM258621    | CEL |
| 74 | BAF3                       | GSM258620    | CEL |
| 73 | BAF3                       | GSM258619    | CEL |
| 72 | Tregs                      | GSM258778    | CEL |
| 71 | T-cells-CD8+               | GSM258777    | CEL |
| 70 | T-cells-CD8+               | GSM258776    | CEL |
| 69 | T-cells-CD4+               | GSM258774    | CEL |
| 68 | T-cells-CD4+               | GSM258773    | CEL |
| 67 | T-cells-CD4+               | GSM258744    | CEL |
| 66 | Thymocyte-DN               | GSM465595    | CEL |
| 65 | Osteoclasts                | GSM258743    | CEL |
| 64 | Microglia                  | GSM258721    | CEL |
| 63 | Microglia                  | GSM258721    | CEL |
| 62 | MM-LPS-7h                  | GSM258706    | CEL |
| 61 | MM-LPS-7h                  | GSM258705    | CEL |
| 60 | MM-LPS-6h                  | GSM258702    | CEL |
| 59 | MM-LPS-6h                  | GSM258701    | CEL |
| 58 | MM-LPS-6h                  | GSM258699    | CEL |
| 57 | MM-LPS-6h                  | GSM258699    | CEL |
| 56 | MM-LPS-6h                  | GSM258694    | CEL |
| 55 | MM-LPS-6h                  | GSM258694    | CEL |
| 54 | MM-LPS-6h                  | GSM258694    | CEL |
| 53 | MM-LPS-6h                  | GSM258694    | CEL |
| 52 | MM-LPS-6h                  | GSM258694    | CEL |
| 51 | MM-LPS-6h                  | GSM258694    | CEL |
| 50 | CD8a-DC                    | GSM258647    | CEL |
| 49 | CD8a-DC                    | GSM258647    | CEL |
| 48 | CD8a+DC                    | GSM258646    | CEL |
| 47 | NK-cells                   | GSM258732    | CEL |
| 46 | NK-cells                   | GSM258731    | CEL |
| 45 | Mast-cells-IgE+Ad          | GSM258718    | CEL |
| 44 | Mast-cells-IgE+Ad          | GSM258717    | CEL |
| 43 | Mast-cells-IgE             | GSM258714    | CEL |
| 42 | Mast-cells-IgE             | GSM258713    | CEL |
| 41 | Mast-cells                 | GSM258712    | CEL |
| 40 | Granulocytes               | GSM258667    | CEL |
| 39 | Granulocytes               | GSM258667    | CEL |
| 38 | GMP                        | GSM258666    | CEL |
| 37 | GMP                        | GSM258665    | CEL |
| 36 | GMP                        | GSM258664    | CEL |
| 35 | GMP                        | GSM258664    | CEL |
| 34 | GMP                        | GSM258642    | CEL |
| 33 | MIEP                       | GSM258672    | CEL |
| 32 | MIEP                       | GSM258671    | CEL |
| 31 | HESC                       | GSM258770    | CEL |
| 30 | HESC                       | GSM258770    | CEL |
| 29 | Bone marrow                | GSM258628    | CEL |
| 28 | Bone marrow                | GSM258627    | CEL |
| 27 | paneth-cells-GE            | GSM116358    | CEL |
| 26 | paneth-cells-GE            | GSM116357    | CEL |
| 25 | paneth-cells               | GSM116350    | CEL |
| 24 | paneth-cells               | GSM116359    | CEL |
| 23 | paneth-cells               | GSM318659    | CEL |
| 22 | paneth-cells               | GSM318690    | CEL |
| 21 | Colon-Crypt                | GSM480375    | CEL |
| 20 | Colon-Crypt                | GSM480374    | CEL |
| 19 | Colon-Vill                 | GSM480363    | CEL |
| 18 | Colon-Vill                 | GSM480362    | CEL |
| 17 | Colon-IEC-Gf               | GSM349880    | CEL |
| 16 | Colon-IEC-Gf               | GSM350375    | CEL |
| 15 | ileum-IEC                  | GSM350376    | CEL |
| 14 | ileum-IEC                  | GSM350371    | CEL |
| 13 | Small-intestine-epithelium | RMINEP002001 | CEL |
| 12 | Small-intestine-epithelium | RMINEP001001 | CEL |
| 11 | FAE                        | RMPYEP002001 | CEL |
| 10 | FAE                        | RMPYEP001001 | CEL |
| 09 | ileum-IEC                  | GSM190797    | CEL |
| 08 | ileum-IEC                  | GSM190796    | CEL |
| 07 | ileum-IEC                  | GSM190795    | CEL |
| 06 | CT-v-M-cells               | GSM190794    | CEL |
| 05 | CT-v-M-cells               | GSM190793    | CEL |
| 04 | CT-y-M-cells               | GSM190792    | CEL |
| 03 | PP-M-cells                 | GSM190791    | CEL |
| 02 | PP-M-cells                 | GSM190790    | CEL |
| 01 | PP-M-cells                 | GSM190789    | CEL |



Cluster0108\_High in NK cells (17 nodes)

393.4  
372.7  
352  
331.3  
310.6  
289.9  
269.2  
248.5  
227.8  
207.1  
186.4  
165.7  
144.9  
124.2  
103.5  
82.8  
62.1  
41.4  
20.7  
0

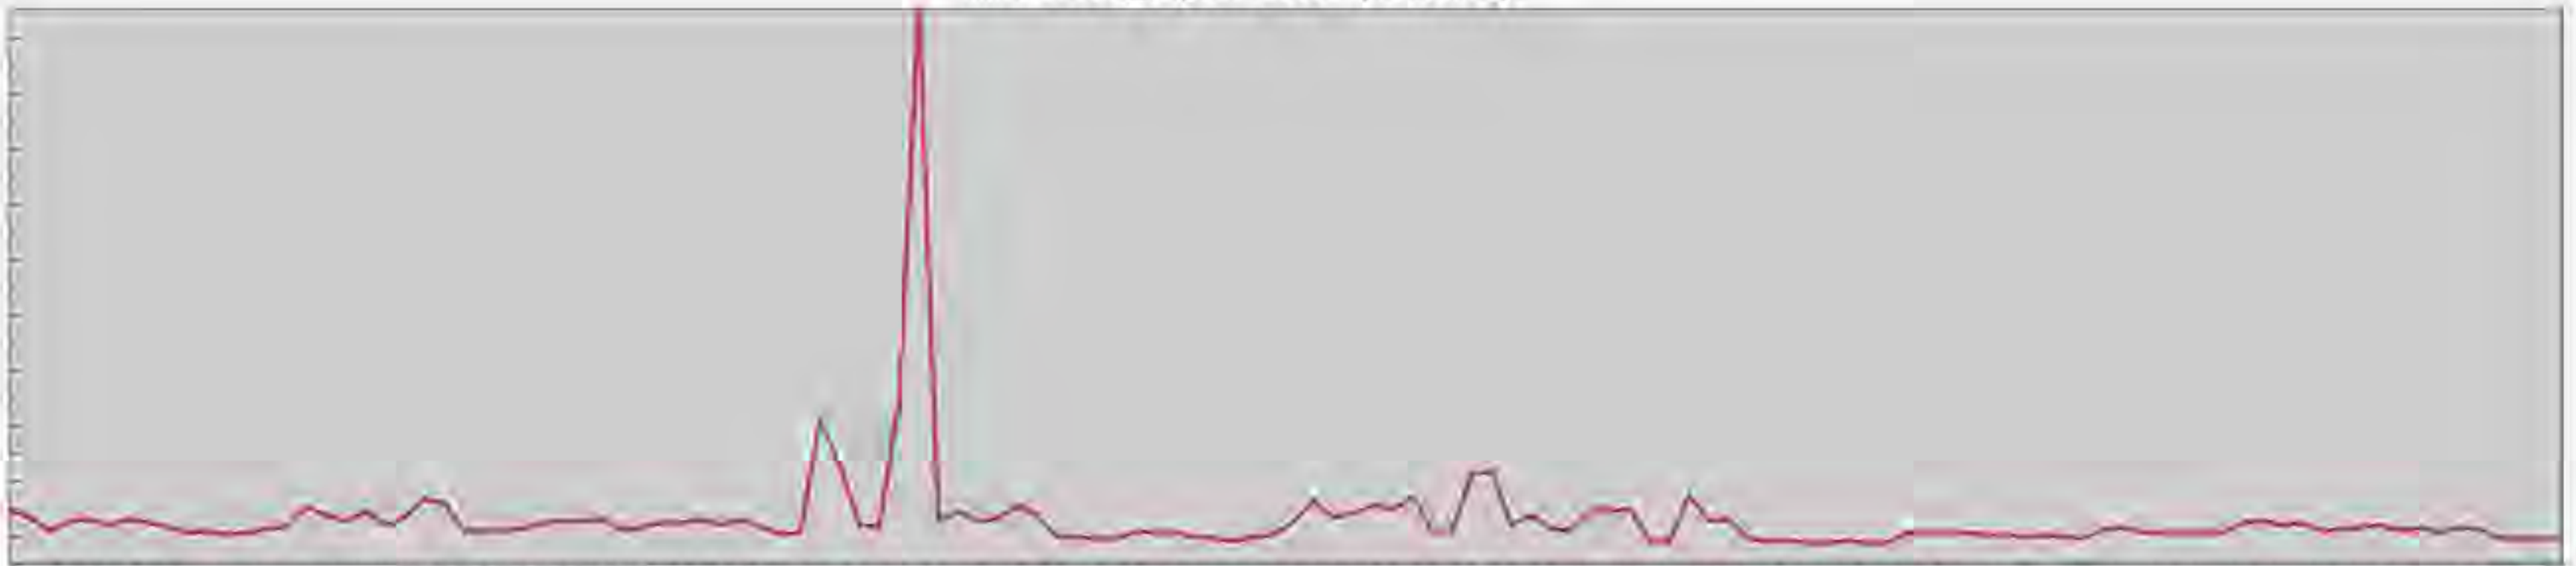

130-NALT GSM289411 CELL  
129-NALT GSM289410 CELL  
128-NALT GSM289409 CELL  
127-NALT GSM289408 CELL  
126-Colon-d9 GSM1988105 CELL  
125-Colon-d9 GSM1988103 CELL  
124-Colon-d9 GSM1988102 CELL  
123-Colon-d4 GSM1988101 CELL  
122-Colon-d4 GSM1988101 CELL  
121-Intestine-large GSM258676 CELL  
120-Intestine-large GSM258675 CELL  
119-Intestine-small GSM258678 CELL  
118-Intestine-small GSM258692 CELL  
117-Lymph-nodes GSM258691 CELL  
116-Lymph-nodes GSM258726 CELL  
115-Spleen GSM258767 CELL  
114-Spleen GSM258767 CELL  
113-Neuro2a GSM258728 CELL  
112-Neuro2a GSM258727 CELL  
111-Astrocytes GSM241898 CELL  
110-mimb GSM258726 CELL  
109-mimb GSM258725 CELL  
108-MIMCD3 GSM258724 CELL  
107-MIMCD3 GSM258723 CELL  
106-Bruce4 GSM258656 CELL  
105-Bruce4 GSM258656 CELL  
104-C2C12 GSM258690 CELL  
103-C2C12 GSM258629 CELL  
102-NH3T3 GSM258730 CELL  
101-NH3T3 GSM258729 CELL  
100-3T3-L1 GSM258610 CELL  
99-3T3-L1 GSM258609 CELL  
98-10T12 GSM258632 CELL  
97-10T12 GSM258631 CELL  
96-Osteoblast-d21 GSM258740 CELL  
95-Osteoblast-d21 GSM258739 CELL  
94-Osteoblast-d14 GSM258738 CELL  
93-Osteoblast-d14 GSM258737 CELL  
92-Osteoblast-d5 GSM258742 CELL  
91-Osteoblast-d5 GSM258741 CELL  
90-Chondrocytes GSM266741 CELL  
89-Chondrocytes GSM266740 CELL  
88-Nat Helper cell GSM465594 CELL  
87-Nat Helper cell GSM465593 CELL  
86-TT cell GSM465596 CELL  
85-MS-1 GSM234692 CELL  
84-Lymph-endo-cells GSM143704 CELL  
83-PP-FDC GSM481977 CELL  
82-PP-FDC GSM481978 CELL  
81-PP-FDC GSM481976 CELL  
80-F-LY RMLNDCC003001 CELL  
79-F-LY RMLNDCC003001 CELL  
78-Follicular-Bcells GSM258664 CELL  
77-Follicular-Bcells GSM258663 CELL  
76-MZ-Bcell GSM258622 CELL  
75-MZ-Bcell GSM258621 CELL  
74-BAF3 GSM258620 CELL  
73-BAF3 GSM258619 CELL  
72-Tregs GSM258778 CELL  
71-Tregs GSM258777 CELL  
70-T-cells-CD8+ GSM258776 CELL  
69-T-cells-CD8+ GSM258774 CELL  
68-T-cells-CD4+ GSM258773 CELL  
67-T-cells-CD4+ GSM258773 CELL  
66-Thymocyte-DN GSM465595 CELL  
65-Osteoclasts GSM258743 CELL  
64-Osteoclasts GSM258743 CELL  
63-Microglia GSM258721 CELL  
62-Microglia GSM258721 CELL  
61-MM-LPS-7h GSM258706 CELL  
60-MM-LPS-7h GSM258706 CELL  
59-MM-LPS-6h GSM258702 CELL  
58-MM-LPS-6h GSM258702 CELL  
57-MM-LPS-6h GSM258700 CELL  
56-MM-LPS-6h GSM258699 CELL  
55-MM-LPS-6h GSM258699 CELL  
54-BM258694 CELL  
53-BM258694 CELL  
52-Ismacryoid-DC GSM258650 CELL  
51-CD8a-DC GSM258649 CELL  
50-CD8a-DC GSM258647 CELL  
49-CD8a+DC GSM258646 CELL  
48-CD8a+DC GSM258646 CELL  
47-NK-cells GSM258732 CELL  
46-NK-cells GSM258732 CELL  
45-Mast-cells-IgE+Ad GSM258719 CELL  
44-Mast-cells-IgE+Ad GSM258717 CELL  
43-Mast-cells-IgE GSM258714 CELL  
42-Mast-cells-IgE GSM258713 CELL  
41-Mast-cells GSM258712 CELL  
40-Granulocytes GSM258668 CELL  
39-Granulocytes GSM258667 CELL  
38-GMP GSM258666 CELL  
37-GMP GSM258666 CELL  
36-GMP GSM258665 CELL  
35-CMP GSM258642 CELL  
34-CMP GSM258642 CELL  
33-MEP GSM258720 CELL  
32-MEP GSM258720 CELL  
31-HESC GSM258770 CELL  
30-HESC GSM258770 CELL  
29-Bone marrow GSM258628 CELL  
28-Bone marrow GSM258627 CELL  
27-paneth-cells-GE GSM116358 CELL  
26-paneth-cells-GE GSM116357 CELL  
25-paneth-cells GSM116350 CELL  
24-paneth-cells GSM116359 CELL  
23-paneth-cells GSM318589 CELL  
22-paneth-cells GSM318589 CELL  
21-paneth-cells GSM318589 CELL  
20-Colon-Crypt GSM480375 cel  
19-Colon-Vill GSM480363 cel  
18-Colon-Vill GSM480362 cel  
17-Colon-IEC-Gf GSM349880 CELL  
16-Colon-IEC-Gf GSM350375 CELL  
15-Ileum-IEC-Gf GSM350376 CELL  
14-Ileum-IEC GSM350371 CELL  
13-Small-intestine-epithelium RMINEP002901 CELL  
12-Small-intestine-epithelium RMINEP001001 CELL  
11-FAE-RMPYEP002001 CELL  
10-FAE-RMPYEP001001 CELL  
09-Ileum-IEC GSM190797 CELL  
08-Ileum-IEC GSM190796 CELL  
07-Ileum-IEC GSM190795 CELL  
06-CT-w-M-cells GSM190794 CELL  
05-CT-w-M-cells GSM190793 CELL  
04-CT-w-M-cells GSM190792 CELL  
03-PP-M-cells GSM190791 CELL  
02-PP-M-cells GSM190790 CELL  
01-PP-M-cells GSM190789 CELL



Cluster0109\_High in FL-Y cells (17 nodes)

402.9  
381.7  
360.5  
339.3  
318.1  
296.9  
275.7  
254.5  
233.3  
212.1  
190.8  
169.0  
148.4  
127.2  
106  
84.8  
63.6  
42.4  
21.2  
0

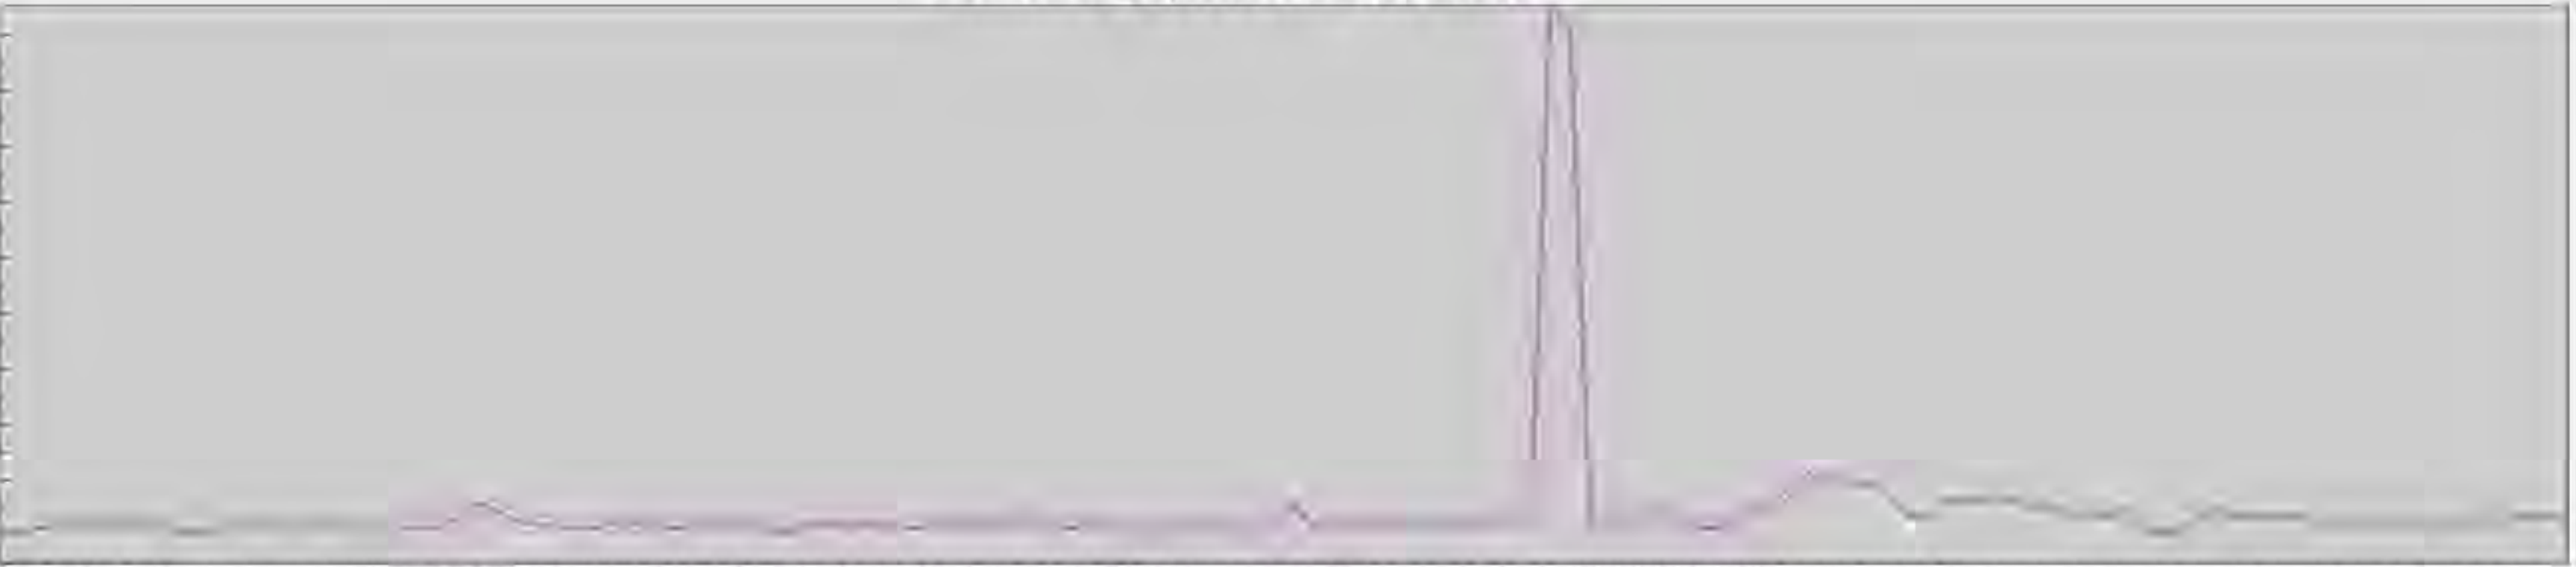

130-NALT GSM289411 CELL  
 129-NALT GSM289410 CELL  
 128-NALT GSM289409 CELL  
 127-NALT GSM289408 CELL  
 126-Color-d9 GSM1988105 CELL  
 125-Color-d9 GSM1988104 CELL  
 124-Color-d9 GSM1988103 CELL  
 123-Color-d4 GSM1988102 CELL  
 122-Color-d4 GSM1988101 CELL  
 121-Intestine-large GSM258676 CELL  
 120-Intestine-large GSM258675 CELL  
 119-Intestine-small GSM258674 CELL  
 118-Intestine-small GSM258673 CELL  
 117-Lymph-nodes GSM258672 CELL  
 116-Lymph-nodes GSM258671 CELL  
 115-Spleen GSM258767 CELL  
 114-Spleen GSM258766 CELL  
 113-Neuro2a GSM258728 CELL  
 112-Neuro2a GSM258727 CELL  
 111-Astrocytes GSM241898 CELL  
 110-mimb GSM258726 CELL  
 109-mimb GSM258725 CELL  
 108-MIMCD3 GSM258724 CELL  
 107-MIMCD3 GSM258723 CELL  
 106-Bruce4 GSM258656 CELL  
 105-Bruce4 GSM258655 CELL  
 104-C2C12 GSM258690 CELL  
 103-C2C12 GSM258689 CELL  
 102-NH3T3 GSM258739 CELL  
 101-NH3T3 GSM258738 CELL  
 100-3T3-L1 GSM258610 CELL  
 99-3T3-L1 GSM258609 CELL  
 98-10T12 GSM258632 CELL  
 97-10T12 GSM258631 CELL  
 96-Osteoblast-d21 GSM258740 CELL  
 95-Osteoblast-d21 GSM258739 CELL  
 94-Osteoblast-d14 GSM258738 CELL  
 93-Osteoblast-d14 GSM258737 CELL  
 92-Osteoblast-d5 GSM258742 CELL  
 91-Osteoblast-d5 GSM258741 CELL  
 90-Chondrocytes GSM266741 CELL  
 89-Chondrocytes GSM266740 CELL  
 88-Nat Helper cell GSM465594 CELL  
 87-Nat Helper cell GSM465593 CELL  
 86-TT cell GSM465596 CELL  
 85-MS-1 GSM234692 CELL  
 84-Lymph-endo-cells GSM143704 CELL  
 83-PP-FDC GSM481977 CELL  
 82-PP-FDC GSM481978 CELL  
 81-PP-FDC GSM481976 CELL  
 80-F-LY RMLNDCC003001 CELL  
 79-F-LY RMLNDCC003001 CELL  
 78-Follicular-Bcells GSM258664 CELL  
 77-Follicular-Bcells GSM258663 CELL  
 76-MZ-Bcell GSM258622 CELL  
 75-MZ-Bcell GSM258621 CELL  
 74-BAF3 GSM258620 CELL  
 73-BAF3 GSM258619 CELL  
 72-Tregs GSM258778 CELL  
 71-Tregs GSM258777 CELL  
 70-T-cells-CD8+ GSM258776 CELL  
 69-T-cells-CD8+ GSM258774 CELL  
 68-T-cells-CD4+ GSM258773 CELL  
 67-T-cells-CD4+ GSM258773 CELL  
 66-Thymocyte-DN GSM465595 CELL  
 65-Osteoclasts GSM258743 CELL  
 64-Osteoclasts GSM258743 CELL  
 63-Microglia GSM258721 CELL  
 62-Microglia GSM258721 CELL  
 61-MM-LPS-7h GSM258706 CELL  
 60-MM-LPS-7h GSM258706 CELL  
 59-MM-LPS-6h GSM258702 CELL  
 58-MM-LPS-6h GSM258702 CELL  
 57-MM-LPS-6h GSM258699 CELL  
 56-MM-LPS-6h GSM258699 CELL  
 55-MM-LPS-6h GSM258694 CELL  
 54-MM-LPS-6h GSM258694 CELL  
 53-Plasmacytoid-DC GSM258650 CELL  
 52-Plasmacytoid-DC GSM258649 CELL  
 51-CD8a-DC GSM258648 CELL  
 50-CD8a-DC GSM258647 CELL  
 49-CD8a+DC GSM258646 CELL  
 48-CD8a+DC GSM258646 CELL  
 47-NK-cells GSM258732 CELL  
 46-NK-cells GSM258731 CELL  
 45-Mast-cells-IgE+Ad GSM258718 CELL  
 44-Mast-cells-IgE+Ad GSM258717 CELL  
 43-Mast-cells-IgE GSM258714 CELL  
 42-Mast-cells-IgE GSM258713 CELL  
 41-Mast-cells GSM258712 CELL  
 40-Granulocytes GSM258668 CELL  
 39-Granulocytes GSM258667 CELL  
 38-GMP GSM258666 CELL  
 37-GMP GSM258665 CELL  
 36-GMP GSM258664 CELL  
 35-GMP GSM258642 CELL  
 34-MPEP GSM258641 CELL  
 33-MPEP GSM258641 CELL  
 32-MPEP GSM258770 CELL  
 31-HESC GSM258770 CELL  
 30-HESC GSM258769 CELL  
 29-Bone marrow GSM258628 CELL  
 28-Bone marrow GSM258627 CELL  
 27-paneth-cells-GE GSM116358 CELL  
 26-paneth-cells-GE GSM116357 CELL  
 25-paneth-cells GSM116350 CELL  
 24-paneth-cells GSM116359 CELL  
 23-paneth-cells GSM318589 CELL  
 22-paneth-cells GSM318590 CELL  
 21-paneth-cells GSM480375 CELL  
 20-paneth-cells GSM480374 CELL  
 19-paneth-cells GSM480363 CELL  
 18-paneth-cells GSM480362 CELL  
 17-paneth-cells GSM349880 CELL  
 16-paneth-cells GSM350375 CELL  
 15-paneth-cells GSM350376 CELL  
 14-paneth-cells GSM350371 CELL  
 13-paneth-cells GSM258679 CELL  
 12-paneth-cells GSM258678 CELL  
 11-paneth-cells GSM258677 CELL  
 10-paneth-cells GSM258677 CELL  
 9-paneth-cells GSM258677 CELL  
 8-paneth-cells GSM258677 CELL  
 7-paneth-cells GSM258677 CELL  
 6-paneth-cells GSM258677 CELL  
 5-paneth-cells GSM258677 CELL  
 4-paneth-cells GSM258677 CELL  
 3-paneth-cells GSM258677 CELL  
 2-paneth-cells GSM258677 CELL  
 1-paneth-cells GSM258677 CELL  
 0-paneth-cells GSM258677 CELL



Cluster0110\_High in NK cells and lymphocytes (17 nodes)

601.9  
570.2  
538.5  
506.9  
475.2  
443.5  
411.8  
380.1  
348.5  
316.8  
285.1  
253.4  
221.8  
190.1  
158.4  
126.7  
95  
63.4  
31.7  
0

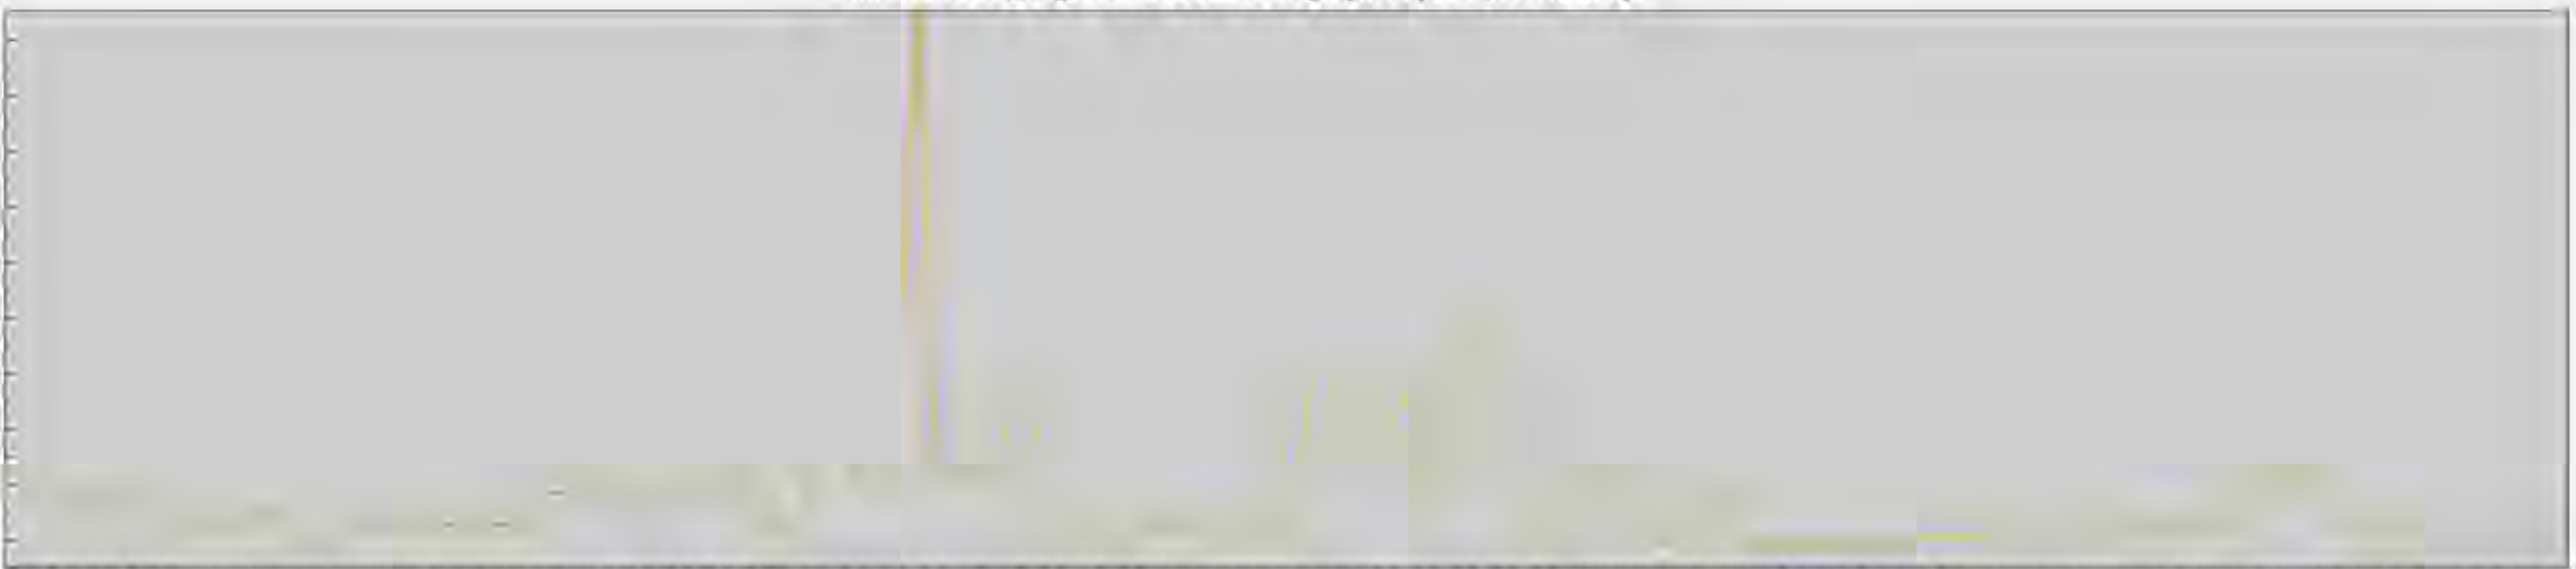

|                             |                             |                             |                             |                               |                               |                            |                            |                           |                         |                         |                                                |                                                |                            |                            |                               |                             |                             |                             |                              |                              |                               |                               |                               |                               |                                    |                                    |                              |                              |                      |                      |                      |                      |                      |                      |                      |                      |                      |                               |                             |                             |                                |                                |                                   |                                   |                           |                           |                          |                          |                          |                          |                                  |                                  |                      |                      |                             |                             |                             |                             |                        |                        |                            |                            |                              |                              |                               |                               |                               |                               |                               |                        |                        |                       |                       |                           |                           |                                    |                                    |                          |                          |                         |                         |                         |                                   |                       |                          |                                  |                                  |                               |                               |                                |                                |                                 |                                 |                                 |                                 |                         |                         |                         |                          |                         |                         |                         |                         |                          |                          |                          |                        |                        |                              |                              |                          |                          |                               |                               |                               |                                   |                                   |                                   |                                   |                                   |                            |                            |                            |                            |                        |                        |                        |                        |
|-----------------------------|-----------------------------|-----------------------------|-----------------------------|-------------------------------|-------------------------------|----------------------------|----------------------------|---------------------------|-------------------------|-------------------------|------------------------------------------------|------------------------------------------------|----------------------------|----------------------------|-------------------------------|-----------------------------|-----------------------------|-----------------------------|------------------------------|------------------------------|-------------------------------|-------------------------------|-------------------------------|-------------------------------|------------------------------------|------------------------------------|------------------------------|------------------------------|----------------------|----------------------|----------------------|----------------------|----------------------|----------------------|----------------------|----------------------|----------------------|-------------------------------|-----------------------------|-----------------------------|--------------------------------|--------------------------------|-----------------------------------|-----------------------------------|---------------------------|---------------------------|--------------------------|--------------------------|--------------------------|--------------------------|----------------------------------|----------------------------------|----------------------|----------------------|-----------------------------|-----------------------------|-----------------------------|-----------------------------|------------------------|------------------------|----------------------------|----------------------------|------------------------------|------------------------------|-------------------------------|-------------------------------|-------------------------------|-------------------------------|-------------------------------|------------------------|------------------------|-----------------------|-----------------------|---------------------------|---------------------------|------------------------------------|------------------------------------|--------------------------|--------------------------|-------------------------|-------------------------|-------------------------|-----------------------------------|-----------------------|--------------------------|----------------------------------|----------------------------------|-------------------------------|-------------------------------|--------------------------------|--------------------------------|---------------------------------|---------------------------------|---------------------------------|---------------------------------|-------------------------|-------------------------|-------------------------|--------------------------|-------------------------|-------------------------|-------------------------|-------------------------|--------------------------|--------------------------|--------------------------|------------------------|------------------------|------------------------------|------------------------------|--------------------------|--------------------------|-------------------------------|-------------------------------|-------------------------------|-----------------------------------|-----------------------------------|-----------------------------------|-----------------------------------|-----------------------------------|----------------------------|----------------------------|----------------------------|----------------------------|------------------------|------------------------|------------------------|------------------------|
| 01-PP-M-cells_GSM190789.CEL | 02-PP-M-cells_GSM190790.CEL | 03-PP-M-cells_GSM190791.CEL | 04-PP-M-cells_GSM190792.CEL | 05-CT-v-M-cells_GSM190793.CEL | 06-CT-v-M-cells_GSM190794.CEL | 07-Ileum-IEC_GSM190795.CEL | 08-Ileum-IEC_GSM190796.CEL | 09-Ileum-RMPYEP001001.CEL | 10-FAE-RMPYEP001001.CEL | 11-FAE-RMPYEP002001.CEL | 12-Small-intestine-epithelium_RMINEP001001.CEL | 13-Small-intestine-epithelium_RMINEP002001.CEL | 14-Ileum-IEC_GSM350371.CEL | 15-Ileum-IEC_GSM350375.CEL | 16-Colon-IEC-Gf_GSM349880.CEL | 17-Colon-VIII_GSM480362.CEL | 18-Colon-VIII_GSM480363.CEL | 19-Colon-VIII_GSM480364.CEL | 20-Colon-Crypt_GSM480374.CEL | 21-Colon-Crypt_GSM480375.CEL | 22-Paneth-cells_GSM318589.CEL | 23-Paneth-cells_GSM318590.CEL | 24-Paneth-cells_GSM116359.CEL | 25-Paneth-cells_GSM116359.CEL | 26-Paneth-cells-Gf-1_GSM116357.CEL | 27-Paneth-cells-Gf-1_GSM116357.CEL | 28-Bone-marrow_GSM258827.CEL | 29-Bone-marrow_GSM258827.CEL | 30-HSC_GSM258770.CEL | 31-HSC_GSM258770.CEL | 32-MEP_GSM258771.CEL | 33-MEP_GSM258771.CEL | 34-MEP_GSM258854.CEL | 35-MEP_GSM258854.CEL | 36-GMP_GSM258866.CEL | 37-GMP_GSM258866.CEL | 38-GMP_GSM258866.CEL | 39-Granulocytes_GSM258667.CEL | 40-Mast-cells_GSM258712.CEL | 41-Mast-cells_GSM258712.CEL | 42-Mast-cells-Gf_GSM258713.CEL | 43-Mast-cells-Gf_GSM258714.CEL | 44-Mast-cells-Gf+Ad_GSM258718.CEL | 45-Mast-cells-Gf+Ad_GSM258718.CEL | 46-NK-cells_GSM258731.CEL | 47-NK-cells_GSM258731.CEL | 48-CD8a+DC_GSM258646.CEL | 49-CD8a+DC_GSM258646.CEL | 50-CD8a-DC_GSM258647.CEL | 51-CD8a-DC_GSM258647.CEL | 52-Plasmacytoid-DC_GSM258649.CEL | 53-Plasmacytoid-DC_GSM258649.CEL | 54-BMM-GSM258694.CEL | 55-BMM-GSM258694.CEL | 56-BMM-LPS-6h_GSM258700.CEL | 57-BMM-LPS-6h_GSM258700.CEL | 58-BMM-LPS-7h_GSM258702.CEL | 59-BMM-LPS-7h_GSM258702.CEL | 60-PP-7h_GSM258706.CEL | 61-PP-7h_GSM258706.CEL | 62-Microglia_GSM258721.CEL | 63-Microglia_GSM258721.CEL | 64-Osteoclasts_GSM258743.CEL | 65-Osteoclasts_GSM258743.CEL | 66-Thymocyte-DN_GSM465595.CEL | 67-T-cells-CD4+_GSM258773.CEL | 68-T-cells-CD4+_GSM258773.CEL | 69-T-cells-CD8+_GSM258776.CEL | 70-T-cells-CD8+_GSM258776.CEL | 71-Tregs_GSM258778.CEL | 72-Tregs_GSM258778.CEL | 73-BAF3_GSM258819.CEL | 74-BAF3_GSM258820.CEL | 75-MZ-Bcell_GSM258821.CEL | 76-MZ-Bcell_GSM258821.CEL | 77-Follicular-Bcells_GSM258864.CEL | 78-Follicular-Bcells_GSM258864.CEL | 79-F-LY-RMLNDC002001.CEL | 80-F-LY-RMLNDC003001.CEL | 81-PP-FDC_GSM481976.CEL | 82-PP-FDC_GSM481976.CEL | 83-PP-FDC_GSM481978.CEL | 84-Lymph-endo-cells_GSM143704.CEL | 85-MS-1_GSM234692.CEL | 86-LT-cell_GSM465596.CEL | 87-Nat-Helper-cell_GSM465593.CEL | 88-Nat-Helper-cell_GSM465594.CEL | 89-Chondrocytes_GSM266741.CEL | 90-Chondrocytes_GSM266741.CEL | 91-Osteoblast-d5_GSM258741.CEL | 92-Osteoblast-d5_GSM258742.CEL | 93-Osteoblast-d14_GSM258737.CEL | 94-Osteoblast-d14_GSM258738.CEL | 95-Osteoblast-d21_GSM258739.CEL | 96-Osteoblast-d21_GSM258739.CEL | 97-10T1/2_GSM258631.CEL | 98-10T1/2_GSM258631.CEL | 99-3T3-L1_GSM258610.CEL | 100-3T3-L1_GSM258610.CEL | 101-NH3T3_GSM258730.CEL | 102-NH3T3_GSM258730.CEL | 103-C2C12_GSM258829.CEL | 104-C2C12_GSM258829.CEL | 106-Bruce4_GSM258866.CEL | 107-MIMCD3_GSM258724.CEL | 108-MIMCD3_GSM258724.CEL | 109-mim6_GSM258725.CEL | 110-mim6_GSM258725.CEL | 111-Astrocytes_GSM241898.CEL | 112-Astrocytes_GSM241898.CEL | 113-Spleen_GSM258767.CEL | 114-Spleen_GSM258767.CEL | 115-Lymph-nodes_GSM258691.CEL | 116-Lymph-nodes_GSM258691.CEL | 117-Lymph-nodes_GSM258691.CEL | 118-Intestine-small_GSM258692.CEL | 119-Intestine-small_GSM258692.CEL | 120-Intestine-large_GSM258677.CEL | 121-Intestine-large_GSM258677.CEL | 122-Intestine-large_GSM258676.CEL | 123-Colon-d4_GSM198810.CEL | 124-Colon-d4_GSM198810.CEL | 125-Colon-d9_GSM198810.CEL | 126-Colon-d9_GSM198810.CEL | 127-NALT_GSM289408.CEL | 128-NALT_GSM289409.CEL | 129-NALT_GSM289410.CEL | 130-NALT_GSM289411.CEL |
|-----------------------------|-----------------------------|-----------------------------|-----------------------------|-------------------------------|-------------------------------|----------------------------|----------------------------|---------------------------|-------------------------|-------------------------|------------------------------------------------|------------------------------------------------|----------------------------|----------------------------|-------------------------------|-----------------------------|-----------------------------|-----------------------------|------------------------------|------------------------------|-------------------------------|-------------------------------|-------------------------------|-------------------------------|------------------------------------|------------------------------------|------------------------------|------------------------------|----------------------|----------------------|----------------------|----------------------|----------------------|----------------------|----------------------|----------------------|----------------------|-------------------------------|-----------------------------|-----------------------------|--------------------------------|--------------------------------|-----------------------------------|-----------------------------------|---------------------------|---------------------------|--------------------------|--------------------------|--------------------------|--------------------------|----------------------------------|----------------------------------|----------------------|----------------------|-----------------------------|-----------------------------|-----------------------------|-----------------------------|------------------------|------------------------|----------------------------|----------------------------|------------------------------|------------------------------|-------------------------------|-------------------------------|-------------------------------|-------------------------------|-------------------------------|------------------------|------------------------|-----------------------|-----------------------|---------------------------|---------------------------|------------------------------------|------------------------------------|--------------------------|--------------------------|-------------------------|-------------------------|-------------------------|-----------------------------------|-----------------------|--------------------------|----------------------------------|----------------------------------|-------------------------------|-------------------------------|--------------------------------|--------------------------------|---------------------------------|---------------------------------|---------------------------------|---------------------------------|-------------------------|-------------------------|-------------------------|--------------------------|-------------------------|-------------------------|-------------------------|-------------------------|--------------------------|--------------------------|--------------------------|------------------------|------------------------|------------------------------|------------------------------|--------------------------|--------------------------|-------------------------------|-------------------------------|-------------------------------|-----------------------------------|-----------------------------------|-----------------------------------|-----------------------------------|-----------------------------------|----------------------------|----------------------------|----------------------------|----------------------------|------------------------|------------------------|------------------------|------------------------|



Cluster0111\_Large intestine and NALT-related (17 nodes)

1,486  
1,407.8  
1,329.6  
1,251.4  
1,173.2  
1,095  
1,016.7  
938.5  
860.3  
782.1  
703.9  
625.7  
547.5  
469.3  
391.1  
312.8  
234.6  
156.4  
78.2  
0

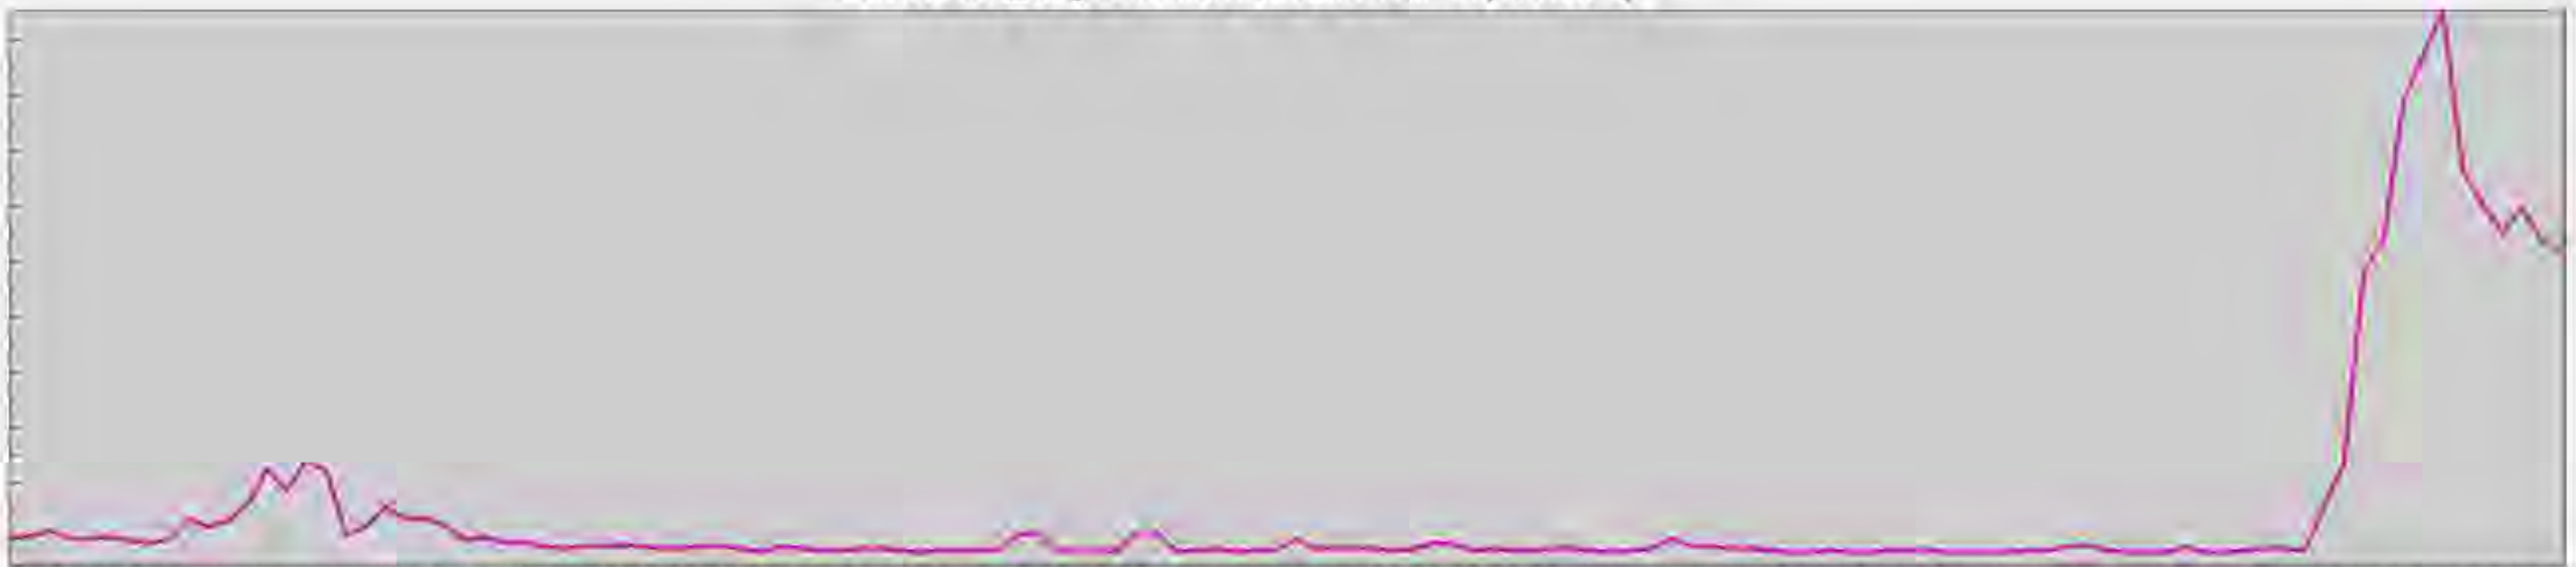

01-PP-M-cells\_GSM190789.CEL  
02-PP-M-cells\_GSM190790.CEL  
03-PP-M-cells\_GSM190791.CEL  
04-CT-V-M-cells\_GSM190792.CEL  
05-CT-V-M-cells\_GSM190793.CEL  
06-CT-V-M-cells\_GSM190794.CEL  
07-Ileum-IEC\_GSM190795.CEL  
08-Ileum-IEC\_GSM190796.CEL  
09-Ileum-IEC\_GSM190797.CEL  
10-FAE-RMPYE001001.CEL  
11-FAE-RMPYE002001.CEL  
12-Small-intestine-epithelium\_RMINEP001001.CEL  
13-Small-intestine-epithelium\_RMINEP002001.CEL  
14-Ileum-IEC\_GSM350371.CEL  
15-Ileum-IEC\_GSM350375.CEL  
16-Colon-IEC-Gf\_GSM349880.CEL  
17-Colon-VIII\_GSM480362.CEL  
18-Colon-VIII\_GSM480363.CEL  
19-Colon-VIII\_GSM480364.CEL  
20-Colon-Crypt\_GSM480374.CEL  
21-Colon-Crypt\_GSM480375.CEL  
22-Paneth-cells\_GSM318590.CEL  
23-Paneth-cells\_GSM318589.CEL  
24-Paneth-cells\_GSM116359.CEL  
25-Paneth-cells\_GSM116350.CEL  
26-Paneth-cells-Gf-1\_GSM116357.CEL  
27-Paneth-cells-Gf-1\_GSM116358.CEL  
28-Bone-marrow\_GSM258627.CEL  
29-Bone-marrow\_GSM258627.CEL  
30-HSC\_GSM258770.CEL  
31-HSC\_GSM258770.CEL  
32-MEP\_GSM258770.CEL  
33-MEP\_GSM258770.CEL  
34-MEP\_GSM258770.CEL  
35-GMP\_GSM258642.CEL  
36-GMP\_GSM258642.CEL  
37-GMP\_GSM258642.CEL  
38-GMP\_GSM258642.CEL  
39-Granulocytes\_GSM258667.CEL  
40-Mast-cells\_GSM258712.CEL  
41-Mast-cells\_GSM258712.CEL  
42-Mast-cells-IdU-GSM258713.CEL  
43-Mast-cells-IdU-GSM258713.CEL  
44-Mast-cells-IdU+Ad-GSM258719.CEL  
45-Mast-cells-IdU+Ad-GSM258719.CEL  
46-NK-cells\_GSM258732.CEL  
47-NK-cells\_GSM258732.CEL  
48-CD8a+DC\_GSM258646.CEL  
49-CD8a+DC\_GSM258646.CEL  
50-CD8a-DC\_GSM258647.CEL  
51-CD8a-DC\_GSM258647.CEL  
52-Plasmacytoid-DC\_GSM258650.CEL  
53-Plasmacytoid-DC\_GSM258649.CEL  
54-BMM-GSM258694.CEL  
55-BMM-GSM258694.CEL  
56-BMM-LPS-6h\_GSM258700.CEL  
57-BMM-LPS-6h\_GSM258700.CEL  
58-BMM-LPS-7h\_GSM258705.CEL  
59-BMM-LPS-7h\_GSM258705.CEL  
60-Microglia\_GSM258721.CEL  
61-Microglia\_GSM258721.CEL  
62-Osteoclasts\_GSM258743.CEL  
63-Osteoclasts\_GSM258743.CEL  
64-Thymocyte-DN\_GSM465595.CEL  
65-Thymocyte-DN\_GSM465595.CEL  
66-T-cells-CD4+\_GSM258773.CEL  
67-T-cells-CD4+\_GSM258773.CEL  
68-T-cells-CD8+\_GSM258774.CEL  
69-T-cells-CD8+\_GSM258774.CEL  
70-T-regs\_GSM258777.CEL  
71-T-regs\_GSM258777.CEL  
72-Tregs\_GSM258778.CEL  
73-Tregs\_GSM258778.CEL  
74-BAF3\_GSM258620.CEL  
75-BAF3\_GSM258620.CEL  
76-MZ-Bcell\_GSM258622.CEL  
77-Follicular-Bcells\_GSM258653.CEL  
78-Follicular-Bcells\_GSM258653.CEL  
79-E-L-Y-RMLNDC002001.CEL  
80-E-L-Y-RMLNDC003001.CEL  
81-PP-FDC\_GSM481976.CEL  
82-PP-FDC\_GSM481976.CEL  
83-PP-FDC\_GSM481977.CEL  
84-Lymph-endo-cells\_GSM143704.CEL  
85-MS-1\_GSM234692.CEL  
86-LT-cell\_GSM465596.CEL  
87-Nat-Helper-cell\_GSM465593.CEL  
88-Nat-Helper-cell\_GSM465593.CEL  
89-Chondrocytes\_GSM266741.CEL  
90-Chondrocytes\_GSM266741.CEL  
91-Osteoblast-d5\_GSM258741.CEL  
92-Osteoblast-d5\_GSM258741.CEL  
93-Osteoblast-d14\_GSM258737.CEL  
94-Osteoblast-d14\_GSM258737.CEL  
95-Osteoblast-d21\_GSM258739.CEL  
96-Osteoblast-d21\_GSM258739.CEL  
97-10T1/2\_GSM258631.CEL  
98-10T1/2\_GSM258631.CEL  
99-3T3-L1\_GSM258610.CEL  
100-3T3-L1\_GSM258610.CEL  
101-NH3T3\_GSM258739.CEL  
102-NH3T3\_GSM258739.CEL  
103-C2C12\_GSM258629.CEL  
104-C2C12\_GSM258629.CEL  
105-Bruce4\_GSM258690.CEL  
106-Bruce4\_GSM258690.CEL  
107-MIMCD3\_GSM258723.CEL  
108-MIMCD3\_GSM258723.CEL  
109-mim6\_GSM258725.CEL  
110-mim6\_GSM258725.CEL  
111-Astrocytes\_GSM241898.CEL  
112-Astrocytes\_GSM241898.CEL  
113-Spleen\_GSM258767.CEL  
114-Spleen\_GSM258767.CEL  
115-Lymph-nodes\_GSM258691.CEL  
116-Lymph-nodes\_GSM258691.CEL  
117-Lymph-nodes\_GSM258691.CEL  
118-Intestine-small\_GSM258677.CEL  
119-Intestine-small\_GSM258677.CEL  
120-Intestine-large\_GSM258676.CEL  
121-Intestine-large\_GSM258676.CEL  
122-Colon-d4\_GSM198810.CEL  
123-Colon-d4\_GSM198810.CEL  
124-Colon-d9\_GSM198810.CEL  
125-Colon-d9\_GSM198810.CEL  
126-NALT\_GSM289408.CEL  
127-NALT\_GSM289408.CEL  
128-NALT\_GSM289410.CEL  
129-NALT\_GSM289410.CEL  
130-NALT\_GSM289411.CEL



Cluster0112\_High in NALT (17 nodes)

358.9  
340  
321.1  
302.2  
283.3  
264.4  
245.5  
226.6  
207.8  
188.9  
170  
151.1  
132.2  
113.3  
94.4  
75.5  
56.7  
37.8  
18.9  
0

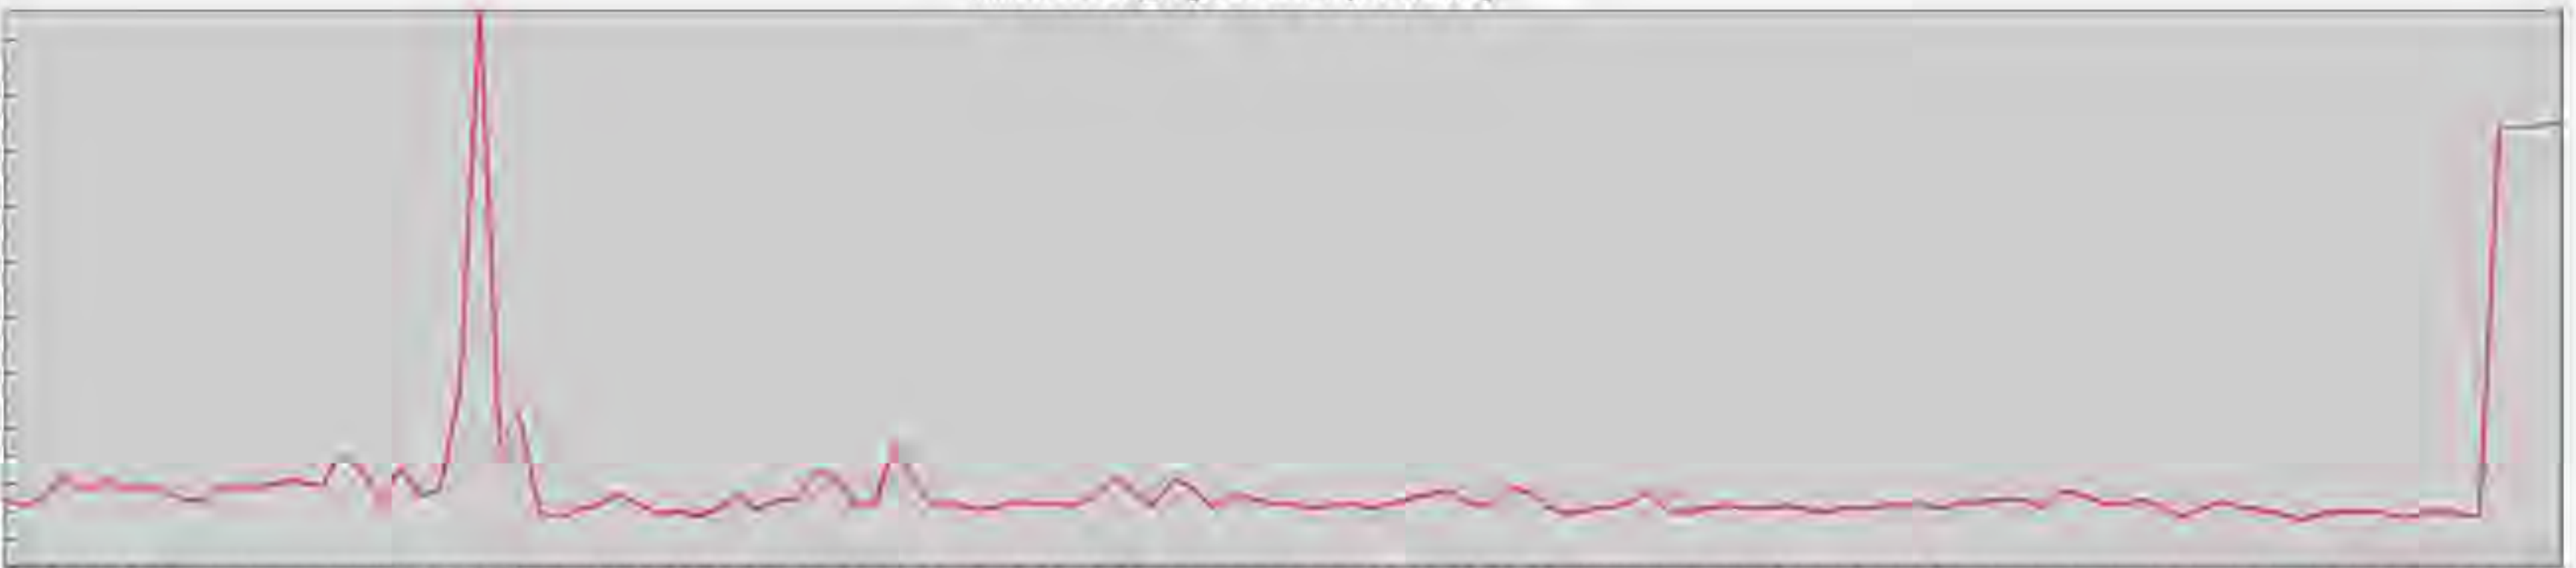

01-PP-M-cells\_GSM190789.CEL  
02-PP-M-cells\_GSM190790.CEL  
03-PP-M-cells\_GSM190791.CEL  
04-CT-V-M-cells\_GSM190792.CEL  
05-CT-V-M-cells\_GSM190793.CEL  
06-CT-V-M-cells\_GSM190794.CEL  
07-Ileum-IEC\_GSM190795.CEL  
08-Ileum-IEC\_GSM190796.CEL  
09-Ileum-IEC\_GSM190797.CEL  
10-FAE-RMPYE\_P001001.CEL  
11-FAE-RMPYE\_P002001.CEL  
12-Small-intestine-epithelium\_RMINEP001001.CEL  
13-Small-intestine-epithelium\_RMINEP002001.CEL  
14-Ileum-IEC\_GSM350371.CEL  
15-Ileum-IEC\_GSM350375.CEL  
16-Colon-IEC-Gf\_GSM349880.CEL  
17-Colon-IEC-Gf\_GSM350375.CEL  
18-Colon-Vill-GSM480362.CEL  
19-Colon-Vill-GSM480363.CEL  
20-Colon-Crypt\_GSM480374.CEL  
21-Colon-Crypt\_GSM480375.CEL  
22-Paneth-cells\_GSM318590.CEL  
23-Paneth-cells\_GSM318589.CEL  
24-Paneth-cells\_GSM116359.CEL  
25-Paneth-cells\_GSM116350.CEL  
26-Paneth-cells-Gf-GSM116357.CEL  
27-Paneth-cells-Gf-GSM116357.CEL  
28-Bone marrow\_GSM258627.CEL  
29-Bone marrow\_GSM258627.CEL  
30-HSC\_GSM258770.CEL  
31-HSC\_GSM258770.CEL  
32-MEP\_GSM258770.CEL  
33-MEP\_GSM258770.CEL  
34-MEP\_GSM258770.CEL  
35-MEP\_GSM258770.CEL  
36-MEP\_GSM258770.CEL  
37-MEP\_GSM258770.CEL  
38-Granulocytes\_GSM258667.CEL  
39-Granulocytes\_GSM258667.CEL  
40-Mast-cells\_GSM258712.CEL  
41-Mast-cells\_GSM258712.CEL  
42-Mast-cells-Gf-GSM258712.CEL  
43-Mast-cells-Gf-GSM258712.CEL  
44-Mast-cells-Gf-GSM258712.CEL  
45-Mast-cells-Gf-GSM258712.CEL  
46-NK-cells\_GSM258731.CEL  
47-NK-cells\_GSM258731.CEL  
48-CD8a+DC\_GSM258646.CEL  
49-CD8a+DC\_GSM258646.CEL  
50-CD8a+DC\_GSM258647.CEL  
51-CD8a+DC\_GSM258647.CEL  
52-CD8a+DC\_GSM258647.CEL  
53-CD8a+DC\_GSM258647.CEL  
54-CD8a+DC\_GSM258647.CEL  
55-CD8a+DC\_GSM258647.CEL  
56-CD8a+DC\_GSM258647.CEL  
57-CD8a+DC\_GSM258647.CEL  
58-CD8a+DC\_GSM258647.CEL  
59-CD8a+DC\_GSM258647.CEL  
60-CD8a+DC\_GSM258647.CEL  
61-CD8a+DC\_GSM258647.CEL  
62-Microglia\_GSM258721.CEL  
63-Microglia\_GSM258721.CEL  
64-Microglia\_GSM258721.CEL  
65-Osteoclasts\_GSM258743.CEL  
66-Osteoclasts\_GSM258743.CEL  
67-Thymocyte-DN\_GSM465595.CEL  
68-Thymocyte-DN\_GSM465595.CEL  
69-T-cells-CD4+\_GSM258773.CEL  
70-T-cells-CD4+\_GSM258773.CEL  
71-T-cells-CD4+\_GSM258773.CEL  
72-T-cells-CD4+\_GSM258773.CEL  
73-Tregs\_GSM258778.CEL  
74-Tregs\_GSM258778.CEL  
75-Tregs\_GSM258778.CEL  
76-Tregs\_GSM258778.CEL  
77-Tregs\_GSM258778.CEL  
78-Tregs\_GSM258778.CEL  
79-Follicular-B-cells\_GSM258664.CEL  
80-Follicular-B-cells\_GSM258664.CEL  
81-Follicular-B-cells\_GSM258664.CEL  
82-Follicular-B-cells\_GSM258664.CEL  
83-Follicular-B-cells\_GSM258664.CEL  
84-Lymph-endo-cells\_GSM143704.CEL  
85-Lymph-endo-cells\_GSM143704.CEL  
86-Lymph-endo-cells\_GSM143704.CEL  
87-Nat Helper cell\_GSM465593.CEL  
88-Nat Helper cell\_GSM465593.CEL  
89-Nat Helper cell\_GSM465593.CEL  
90-Chondrocytes\_GSM258741.CEL  
91-Chondrocytes\_GSM258741.CEL  
92-Osteoblast-d5\_GSM258741.CEL  
93-Osteoblast-d5\_GSM258741.CEL  
94-Osteoblast-d14\_GSM258737.CEL  
95-Osteoblast-d21\_GSM258738.CEL  
96-Osteoblast-d21\_GSM258738.CEL  
97-Osteoblast-d21\_GSM258738.CEL  
98-Osteoblast-d21\_GSM258738.CEL  
99-3T3-L1\_GSM258610.CEL  
100-3T3-L1\_GSM258610.CEL  
101-NH3T3\_GSM258730.CEL  
102-NH3T3\_GSM258730.CEL  
103-NH3T3\_GSM258730.CEL  
104-Bruce4\_GSM258690.CEL  
105-Bruce4\_GSM258690.CEL  
106-Bruce4\_GSM258690.CEL  
107-MIMCD3\_GSM258723.CEL  
108-MIMCD3\_GSM258723.CEL  
109-mim6\_GSM258725.CEL  
110-mim6\_GSM258725.CEL  
111-Astrocytes\_GSM241898.CEL  
112-Astrocytes\_GSM241898.CEL  
113-Spleen\_GSM258767.CEL  
114-Spleen\_GSM258767.CEL  
115-Spleen\_GSM258767.CEL  
116-Lymph-nodes\_GSM258691.CEL  
117-Lymph-nodes\_GSM258691.CEL  
118-Intestine-small\_GSM258692.CEL  
119-Intestine-small\_GSM258692.CEL  
120-Intestine-large\_GSM258675.CEL  
121-Intestine-large\_GSM258675.CEL  
122-Intestine-large\_GSM258675.CEL  
123-Colon-d4\_GSM198101.CEL  
124-Colon-d4\_GSM198101.CEL  
125-Colon-d9\_GSM198103.CEL  
126-Colon-d9\_GSM198103.CEL  
127-NALT\_GSM289408.CEL  
128-NALT\_GSM289409.CEL  
129-NALT\_GSM289410.CEL  
130-NALT\_GSM289411.CEL



Cluster0113\_Uncertain (16 nodes)

104.2  
98.7  
93.2  
87.7  
82.2  
76.7  
71.3  
65.8  
60.3  
54.8  
49.3  
43.9  
38.4  
32.9  
27.4  
21.9  
16.4  
11  
5.5  
0

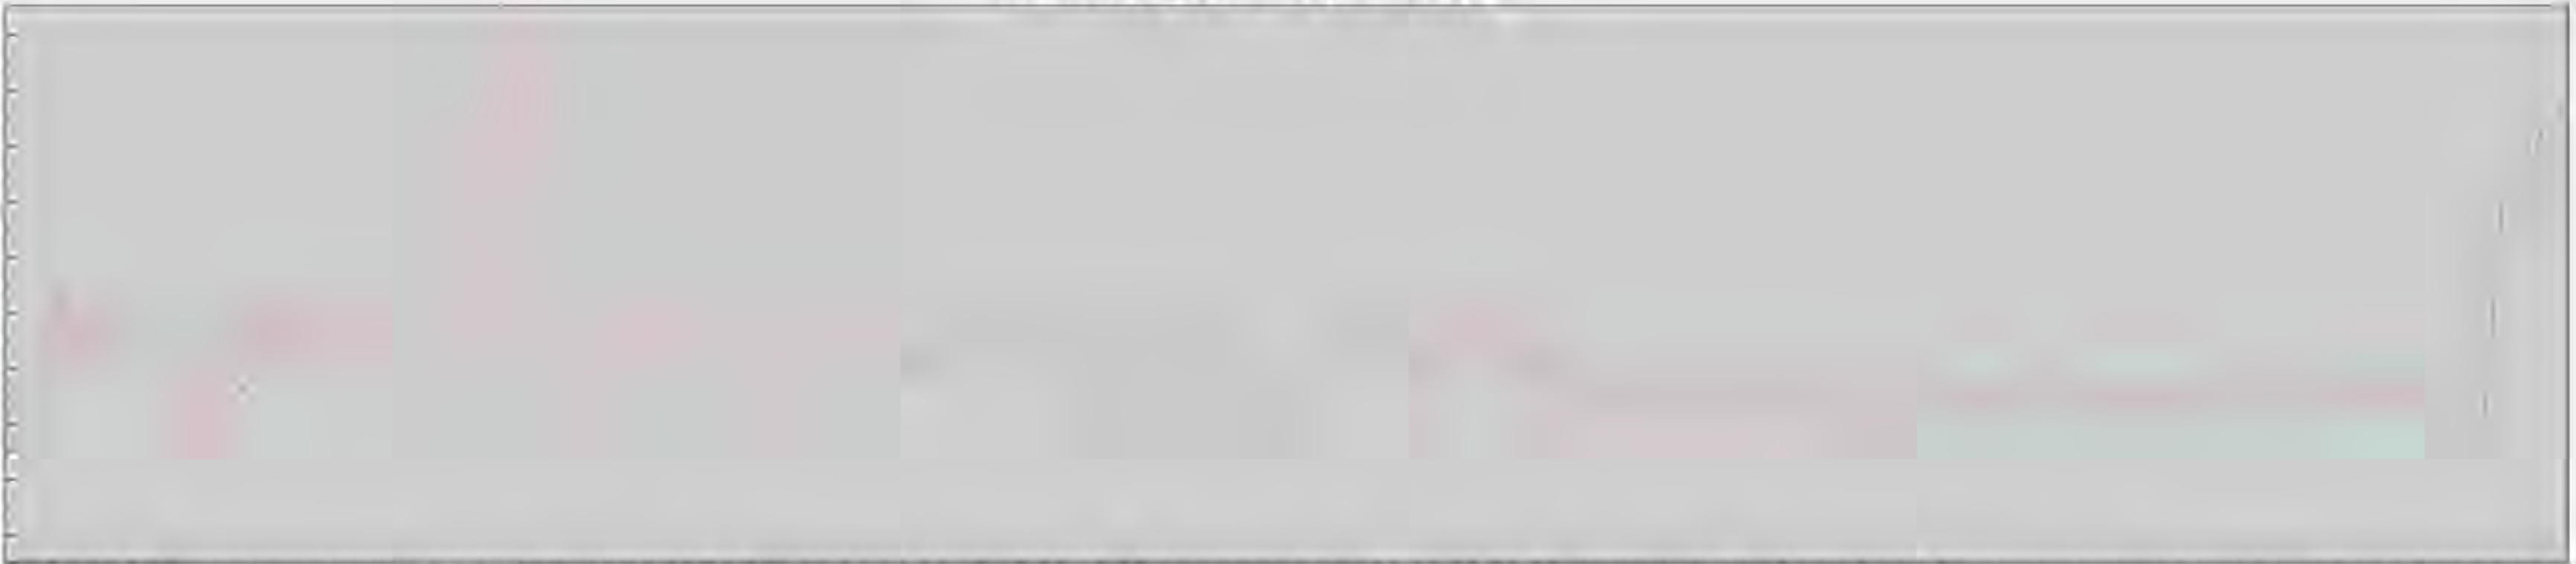

|     |                            |              |     |
|-----|----------------------------|--------------|-----|
| 01  | PP-M-cells                 | GSM190789    | CEL |
| 02  | PP-M-cells                 | GSM190790    | CEL |
| 03  | PP-M-cells                 | GSM190791    | CEL |
| 04  | CT-v-M-cells               | GSM190792    | CEL |
| 05  | CT-v-M-cells               | GSM190793    | CEL |
| 06  | CT-v-M-cells               | GSM190794    | CEL |
| 07  | Ileum-IEC                  | GSM190795    | CEL |
| 08  | Ileum-IEC                  | GSM190796    | CEL |
| 09  | Ileum-IEC                  | GSM190797    | CEL |
| 10  | FAE-RMP                    | GSM190798    | CEL |
| 11  | FAE-RMP                    | GSM190799    | CEL |
| 12  | Small-intestine-epithelium | RMINEP001001 | CEL |
| 13  | Small-intestine-epithelium | RMINEP002001 | CEL |
| 14  | Ileum-IEC                  | GSM350371    | CEL |
| 15  | Ileum-IEC                  | GSM350375    | CEL |
| 16  | Colon-VIII                 | GSM480362    | cel |
| 17  | Colon-VIII                 | GSM480363    | cel |
| 18  | Colon-VIII                 | GSM480364    | cel |
| 19  | Colon-VIII                 | GSM480365    | cel |
| 20  | Colon-Crypt                | GSM480374    | cel |
| 21  | Colon-Crypt                | GSM480375    | cel |
| 22  | Paneth-cells               | GSM318589    | CEL |
| 23  | Paneth-cells               | GSM318590    | CEL |
| 24  | Paneth-cells               | GSM116359    | CEL |
| 25  | Paneth-cells               | GSM116359    | CEL |
| 26  | Paneth-cells               | GSM116357    | CEL |
| 27  | Paneth-cells               | GSM116358    | CEL |
| 28  | Bone marrow                | GSM258667    | CEL |
| 29  | Bone marrow                | GSM258668    | CEL |
| 30  | HSC                        | GSM258770    | CEL |
| 31  | HSC                        | GSM258771    | CEL |
| 32  | MEP                        | GSM258772    | CEL |
| 33  | MEP                        | GSM258773    | CEL |
| 34  | MEP                        | GSM258774    | CEL |
| 35  | MEP                        | GSM258775    | CEL |
| 36  | GMP                        | GSM258666    | CEL |
| 37  | GMP                        | GSM258666    | CEL |
| 38  | GMP                        | GSM258666    | CEL |
| 39  | Granulocytes               | GSM258667    | CEL |
| 40  | Mast-cells                 | GSM258771    | CEL |
| 41  | Mast-cells                 | GSM258772    | CEL |
| 42  | Mast-cells                 | GSM258773    | CEL |
| 43  | Mast-cells                 | GSM258774    | CEL |
| 44  | Mast-cells                 | GSM258775    | CEL |
| 45  | Mast-cells                 | GSM258776    | CEL |
| 46  | NK-cells                   | GSM258777    | CEL |
| 47  | NK-cells                   | GSM258778    | CEL |
| 48  | CD8a+DC                    | GSM258646    | CEL |
| 49  | CD8a+DC                    | GSM258647    | CEL |
| 50  | CD8a+DC                    | GSM258647    | CEL |
| 51  | CD8a+DC                    | GSM258647    | CEL |
| 52  | CD8a+DC                    | GSM258647    | CEL |
| 53  | CD8a+DC                    | GSM258647    | CEL |
| 54  | CD8a+DC                    | GSM258647    | CEL |
| 55  | CD8a+DC                    | GSM258647    | CEL |
| 56  | CD8a+DC                    | GSM258647    | CEL |
| 57  | CD8a+DC                    | GSM258647    | CEL |
| 58  | CD8a+DC                    | GSM258647    | CEL |
| 59  | CD8a+DC                    | GSM258647    | CEL |
| 60  | CD8a+DC                    | GSM258647    | CEL |
| 61  | CD8a+DC                    | GSM258647    | CEL |
| 62  | Microglia                  | GSM258721    | CEL |
| 63  | Microglia                  | GSM258721    | CEL |
| 64  | Osteoclasts                | GSM258743    | CEL |
| 65  | Osteoclasts                | GSM258744    | CEL |
| 66  | Thymocyte-DN               | GSM465595    | CEL |
| 67  | T-cells-CD4+               | GSM258773    | CEL |
| 68  | T-cells-CD4+               | GSM258773    | CEL |
| 69  | T-cells-CD8+               | GSM258774    | CEL |
| 70  | T-cells-CD8+               | GSM258774    | CEL |
| 71  | Tregs                      | GSM258778    | CEL |
| 72  | Tregs                      | GSM258778    | CEL |
| 73  | BAF3                       | GSM258620    | CEL |
| 74  | BAF3                       | GSM258620    | CEL |
| 75  | MZ-Bcell                   | GSM258621    | CEL |
| 76  | MZ-Bcell                   | GSM258621    | CEL |
| 77  | Follicular-Bcells          | GSM258664    | CEL |
| 78  | Follicular-Bcells          | GSM258664    | CEL |
| 79  | F-LY-RMLNDC                | GSM258664    | CEL |
| 80  | F-LY-RMLNDC                | GSM258664    | CEL |
| 81  | PP-FDC                     | GSM481976    | CEL |
| 82  | PP-FDC                     | GSM481976    | CEL |
| 83  | PP-FDC                     | GSM481977    | CEL |
| 84  | Lymph-endo-cells           | GSM143704    | CEL |
| 85  | MS-1                       | GSM234692    | CEL |
| 86  | TI cell                    | GSM465596    | CEL |
| 87  | Nat Helper cell            | GSM465593    | CEL |
| 88  | Nat Helper cell            | GSM465594    | CEL |
| 89  | Chondrocytes               | GSM258741    | CEL |
| 90  | Chondrocytes               | GSM258741    | CEL |
| 91  | Osteoblast-d5              | GSM258742    | CEL |
| 92  | Osteoblast-d5              | GSM258742    | CEL |
| 93  | Osteoblast-d14             | GSM258737    | CEL |
| 94  | Osteoblast-d14             | GSM258737    | CEL |
| 95  | Osteoblast-d21             | GSM258738    | CEL |
| 96  | Osteoblast-d21             | GSM258738    | CEL |
| 97  | OT12                       | GSM258631    | CEL |
| 98  | OT12                       | GSM258631    | CEL |
| 99  | 3T3-L1                     | GSM258609    | CEL |
| 100 | 3T3-L1                     | GSM258610    | CEL |
| 101 | NH3T3                      | GSM258739    | CEL |
| 102 | NH3T3                      | GSM258739    | CEL |
| 103 | C2C12                      | GSM258629    | CEL |
| 104 | C2C12                      | GSM258629    | CEL |
| 105 | Bruce4                     | GSM258666    | CEL |
| 106 | Bruce4                     | GSM258666    | CEL |
| 107 | MIMCD3                     | GSM258723    | CEL |
| 108 | MIMCD3                     | GSM258723    | CEL |
| 109 | mim6                       | GSM258725    | CEL |
| 110 | mim6                       | GSM258725    | CEL |
| 111 | Astrocytes                 | GSM241898    | CEL |
| 112 | Neuro2a                    | GSM258728    | CEL |
| 113 | Spleen                     | GSM258767    | CEL |
| 114 | Spleen                     | GSM258767    | CEL |
| 115 | Lymph-nodes                | GSM258691    | CEL |
| 116 | Lymph-nodes                | GSM258691    | CEL |
| 117 | Lymph-nodes                | GSM258691    | CEL |
| 118 | Intestine-small            | GSM258677    | CEL |
| 119 | Intestine-small            | GSM258677    | CEL |
| 120 | Intestine-large            | GSM258675    | CEL |
| 121 | Intestine-large            | GSM258675    | CEL |
| 122 | Colon-d4                   | GSM198810    | CEL |
| 123 | Colon-d4                   | GSM198810    | CEL |
| 124 | Colon-d9                   | GSM198810    | CEL |
| 125 | Colon-d9                   | GSM198810    | CEL |
| 126 | Colon-d9                   | GSM198810    | CEL |
| 127 | NALT                       | GSM289408    | CEL |
| 128 | NALT                       | GSM289409    | CEL |
| 129 | NALT                       | GSM289410    | CEL |
| 130 | NALT                       | GSM289411    | CEL |



Cluster0114\_Uncertain (16 nodes)

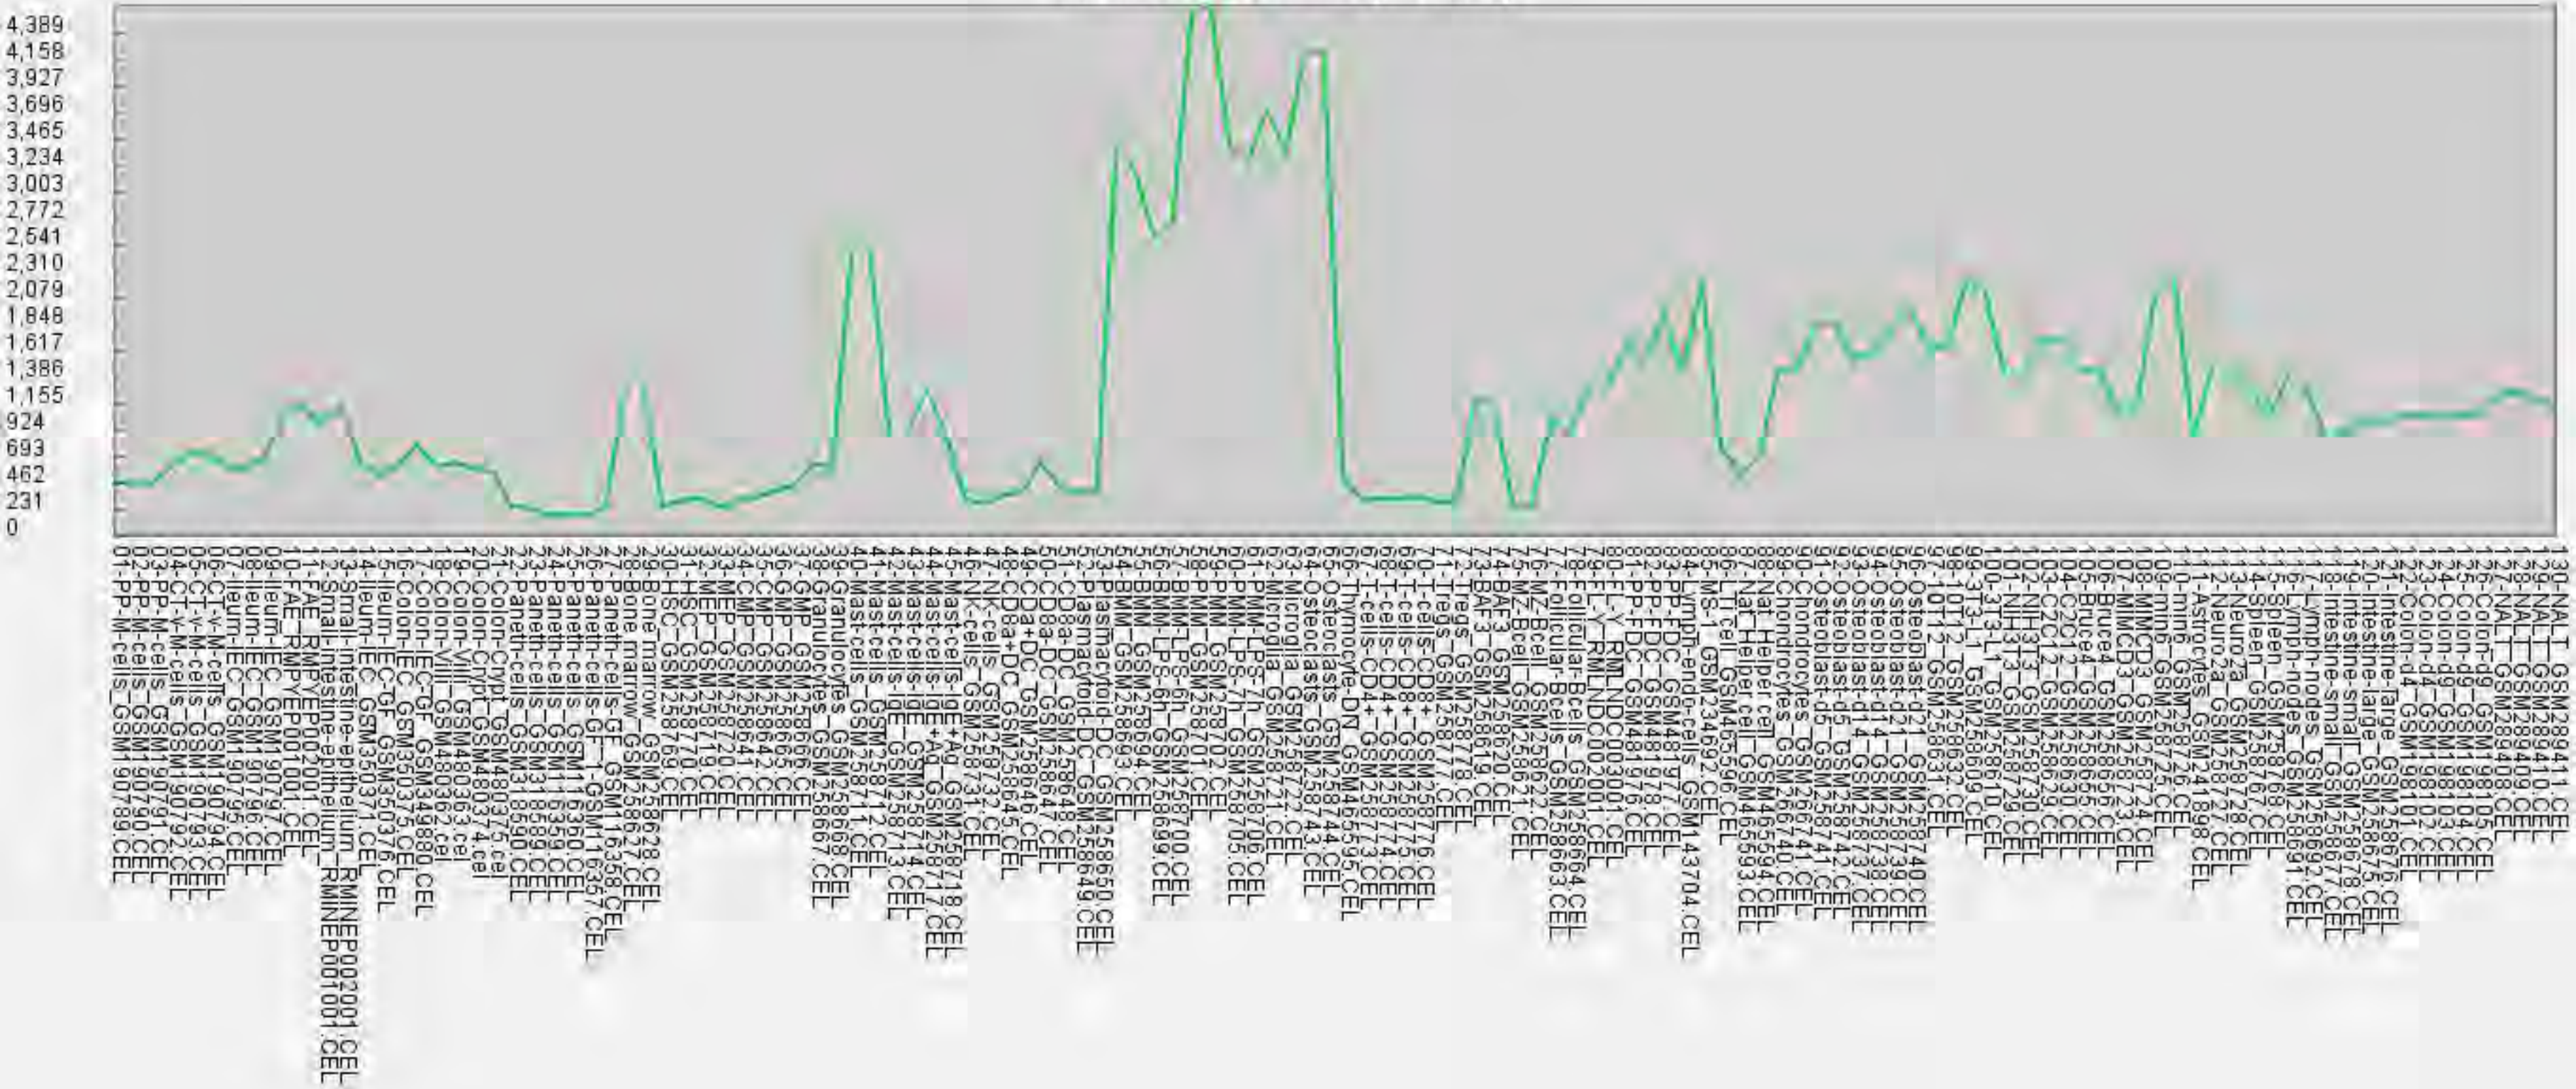



Cluster0115\_House keeping-cell cycle (16 nodes)

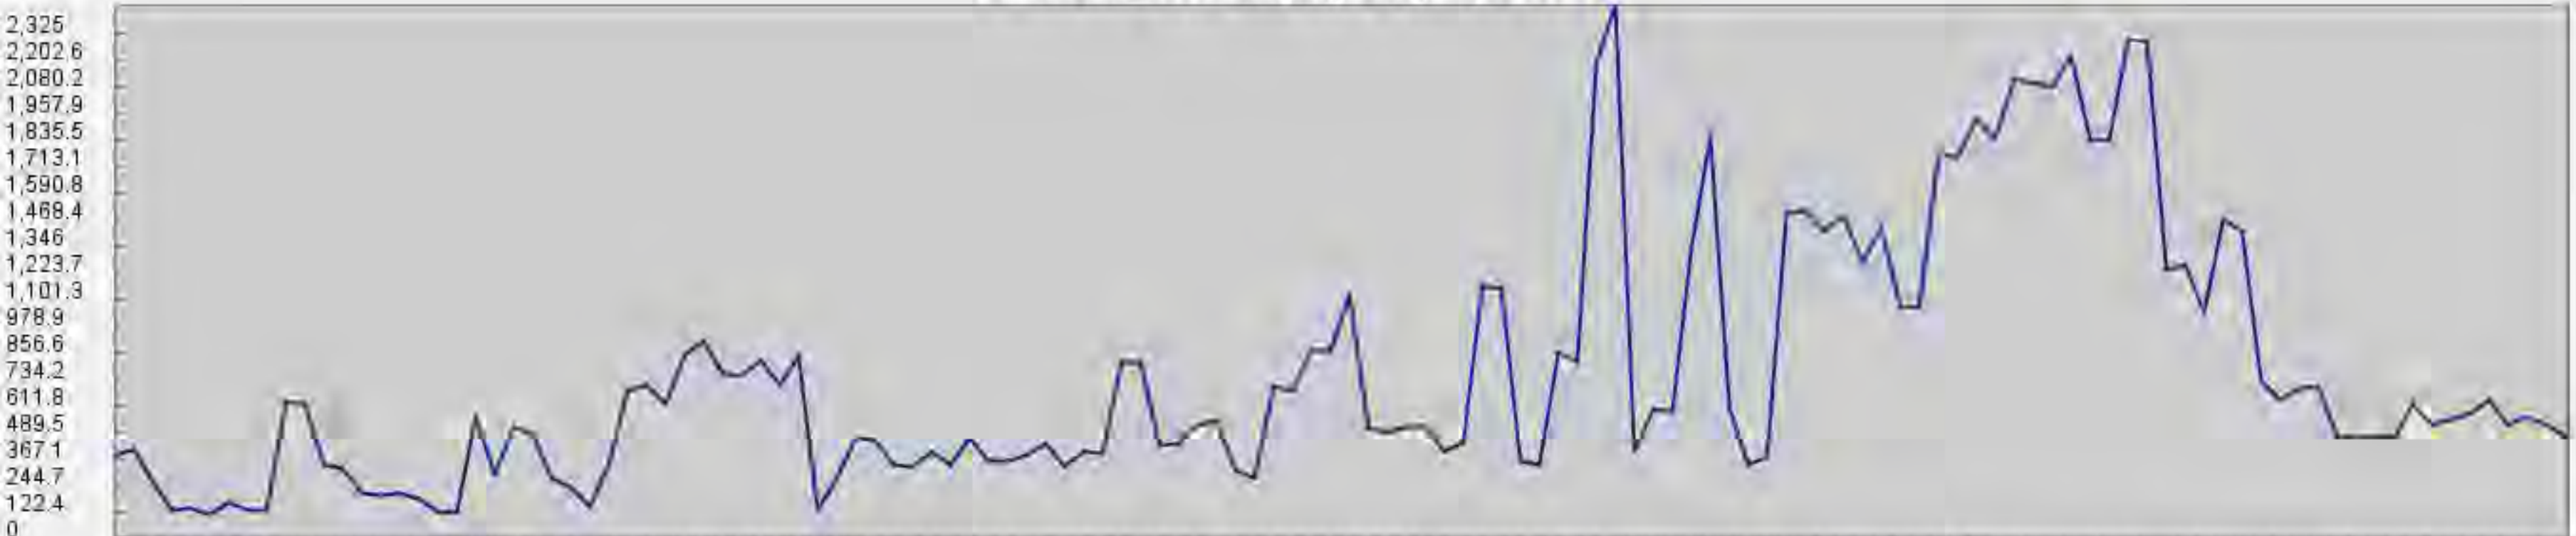







Cluster0117\_High in some Paneth cells (16 nodes)

331.3  
313.8  
296.4  
279  
261.5  
244.1  
226.7  
209.2  
191.8  
174.4  
156.9  
139.5  
122  
104.6  
87.2  
69.7  
52.3  
34.9  
17.4  
0

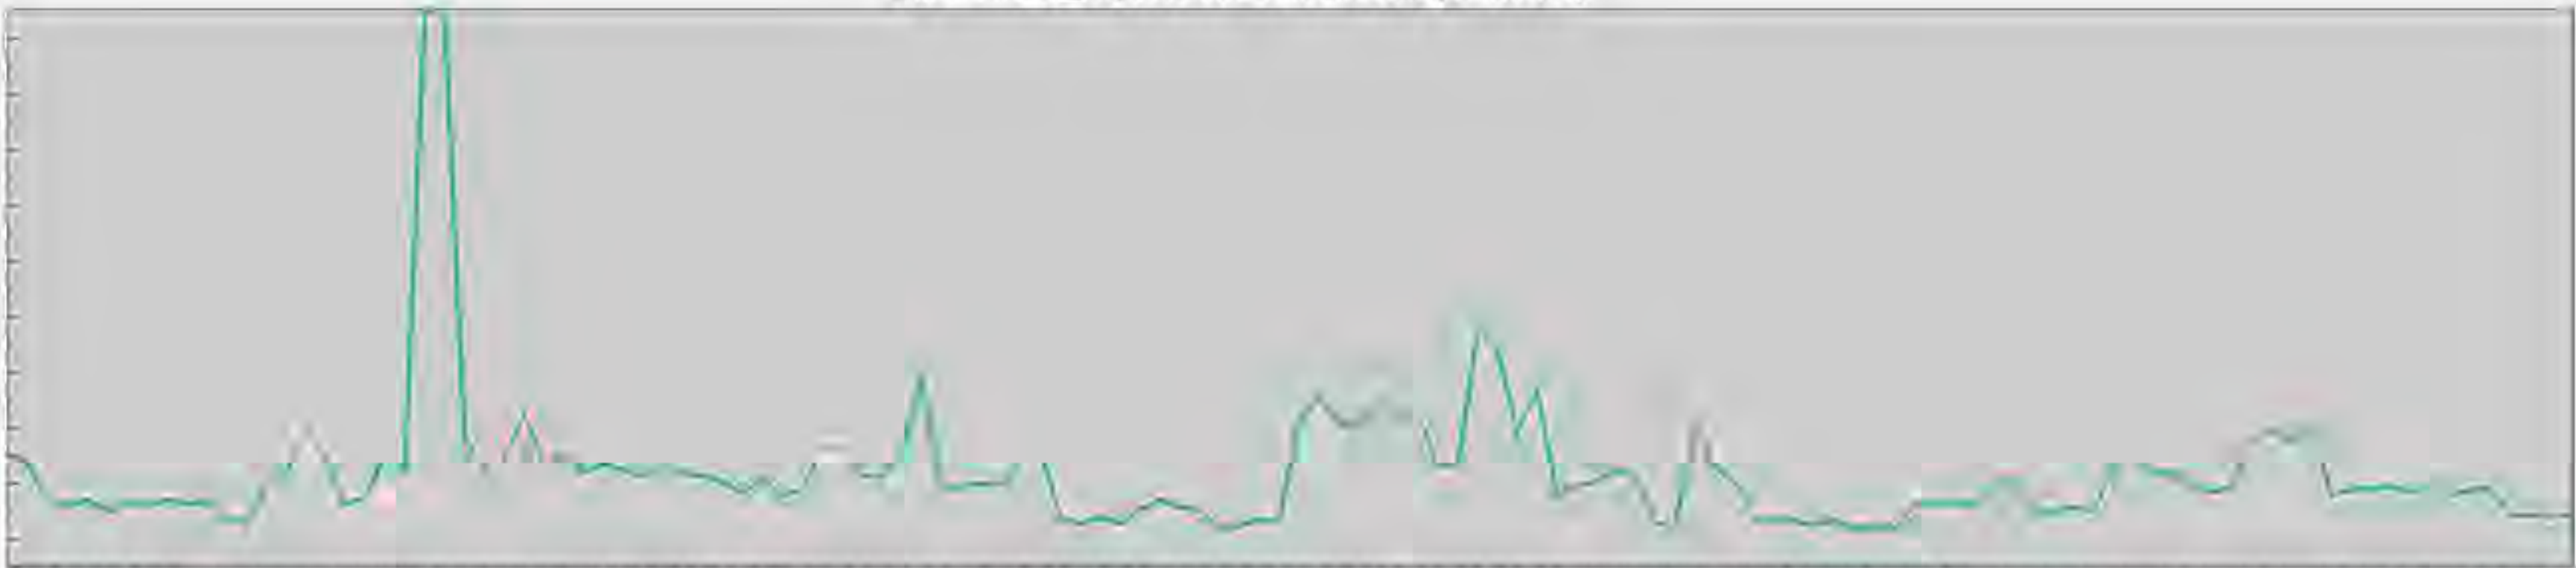

130-NALT GSM289411 CELL  
 129-NALT GSM289410 CELL  
 128-NALT GSM289409 CELL  
 127-NALT GSM289408 CELL  
 126- Colon-d9 GSM1988105 CELL  
 125- Colon-d9 GSM1988104 CELL  
 124- Colon-d9 GSM1988103 CELL  
 123- Colon-d4 GSM1988102 CELL  
 122- Colon-d4 GSM1988101 CELL  
 121- Intestine-large GSM258676 CELL  
 120- Intestine-large GSM258675 CELL  
 119- Intestine-small GSM258674 CELL  
 118- Intestine-small GSM258673 CELL  
 117- Lymph-nodes GSM258672 CELL  
 116- Lymph-nodes GSM258671 CELL  
 115- Spleen GSM258767 CELL  
 114- Spleen GSM258766 CELL  
 113- Neuro2a GSM258728 CELL  
 112- Neuro2a GSM258727 CELL  
 111- Astrocytes GSM241898 CELL  
 110- mimb GSM258726 CELL  
 109- mimb GSM258725 CELL  
 108- MIMCD3 GSM258724 CELL  
 107- MIMCD3 GSM258723 CELL  
 106- Bruce4 GSM258665 CELL  
 105- Bruce4 GSM258664 CELL  
 104- C2C12 GSM258690 CELL  
 103- C2C12 GSM258689 CELL  
 102- NIH3T3 GSM258730 CELL  
 101- NIH3T3 GSM258729 CELL  
 100- 3T3-L1 GSM258610 CELL  
 99- 3T3-L1 GSM258609 CELL  
 98- 10T1/2 GSM258632 CELL  
 97- 10T1/2 GSM258631 CELL  
 96- Osteoblast-d21 GSM258740 CELL  
 95- Osteoblast-d21 GSM258739 CELL  
 94- Osteoblast-d14 GSM258738 CELL  
 93- Osteoblast-d14 GSM258737 CELL  
 92- Osteoblast-d5 GSM258742 CELL  
 91- Osteoblast-d5 GSM258741 CELL  
 90- Chondrocytes GSM266741 CELL  
 89- Chondrocytes GSM266740 CELL  
 88- Nat Helper cell GSM465594 CELL  
 87- Nat Helper cell GSM465593 CELL  
 86- Tt cell GSM465596 CELL  
 85- MS-1 GSM234692 CELL  
 84- Lymph-endo-cells GSM143704 CELL  
 83- PP-FDC GSM481977 CELL  
 82- PP-FDC GSM481978 CELL  
 81- PP-FDC GSM481976 CELL  
 80- D-L Y RMLNDCC003001 CELL  
 79- E-L Y RMLNDCC003001 CELL  
 78- Follicular-Bcells GSM258664 CELL  
 77- Follicular-Bcells GSM258663 CELL  
 76- MZ-Bcell GSM258622 CELL  
 75- MZ-Bcell GSM258621 CELL  
 74- BAF3 GSM258620 CELL  
 73- BAF3 GSM258619 CELL  
 72- Tregs GSM258778 CELL  
 71- Tregs GSM258777 CELL  
 70- T-cells-CD8+ GSM258776 CELL  
 69- T-cells-CD8+ GSM258774 CELL  
 68- T-cells-CD4+ GSM258773 CELL  
 67- T-cells-CD4+ GSM258744 CELL  
 66- Thymocyte-DN GSM465595 CELL  
 65- Osteoclasts GSM258743 CELL  
 64- Microglia GSM258721 CELL  
 63- Microglia GSM258721 CELL  
 62- MM-LPS-7h GSM268706 CELL  
 61- MM-LPS-7h GSM268705 CELL  
 60- MM-LPS-6h GSM258702 CELL  
 59- MM-LPS-6h GSM258701 CELL  
 58- MM-LPS-6h GSM258699 CELL  
 57- MM-LPS-6h GSM258699 CELL  
 56- MM-LPS-6h GSM258694 CELL  
 55- BMM GSM258693 CELL  
 54- BMM GSM258693 CELL  
 53- Plasmacytoid-DC GSM258649 CELL  
 52- CD8a-DC GSM258647 CELL  
 51- CD8a-DC GSM258647 CELL  
 50- CD8a+DC GSM258646 CELL  
 49- CD8a+DC GSM258646 CELL  
 48- NK-cells GSM258732 CELL  
 47- NK-cells GSM258731 CELL  
 46- Mast-cells-IgE+Ad GSM258718 CELL  
 45- Mast-cells-IgE+Ad GSM258717 CELL  
 44- Mast-cells-IgE GSM258714 CELL  
 43- Mast-cells-IgE GSM258713 CELL  
 42- Mast-cells GSM258712 CELL  
 41- Mast-cells GSM258711 CELL  
 40- Granulocytes GSM258667 CELL  
 39- Granulocytes GSM258667 CELL  
 38- GMP GSM258666 CELL  
 37- GMP GSM258666 CELL  
 36- GMP GSM258665 CELL  
 35- CMP GSM258642 CELL  
 34- CMP GSM258641 CELL  
 33- MIEP GSM258720 CELL  
 32- MIEP GSM258719 CELL  
 31- HSC GSM258770 CELL  
 30- HSC GSM258769 CELL  
 29- Bone marrow GSM258628 CELL  
 28- Bone marrow GSM258627 CELL  
 27- Paneth-cells-GF GSM116358 CELL  
 26- Paneth-cells-GF GSM116357 CELL  
 25- Paneth-cells GSM116350 CELL  
 24- Paneth-cells GSM116350 CELL  
 23- Paneth-cells GSM318589 CELL  
 22- Paneth-cells GSM318590 CELL  
 21- Colon-Crypt GSM480375 CELL  
 20- Colon-Crypt GSM480374 CELL  
 19- Colon-Vill GSM480363 CELL  
 18- Colon-Vill GSM480362 CELL  
 17- Colon-IEC-GF GSM349880 CELL  
 16- Colon-IEC-GF GSM350375 CELL  
 15- Ileum-IEC-GF GSM350376 CELL  
 14- Ileum-IEC GSM350371 CELL  
 13- Small-intestine-epithelium RMINEP002901 CELL  
 12- Small-intestine-epithelium RMINEP001001 CELL  
 11- FAE-RMPYEP002001 CELL  
 10- FAE-RMPYEP001001 CELL  
 09- Ileum-IEC GSM190797 CELL  
 08- Ileum-IEC GSM190796 CELL  
 07- Ileum-IEC GSM190795 CELL  
 06- CT-v-M-cells GSM190794 CELL  
 05- CT-v-M-cells GSM190793 CELL  
 04- PP-M-cells GSM190792 CELL  
 03- PP-M-cells GSM190791 CELL  
 02- PP-M-cells GSM190790 CELL  
 01- PP-M-cells GSM190789 CELL



Cluster0118\_Paneth cell-related (16 nodes)

2,851 2  
2,701 1  
2,551 1  
2,401  
2,250.9  
2,100.9  
1,950.8  
1,800.8  
1,650.7  
1,500.6  
1,350.6  
1,200.5  
1,050.4  
900.4  
750.3  
600.3  
450.2  
300.1  
150.1  
0

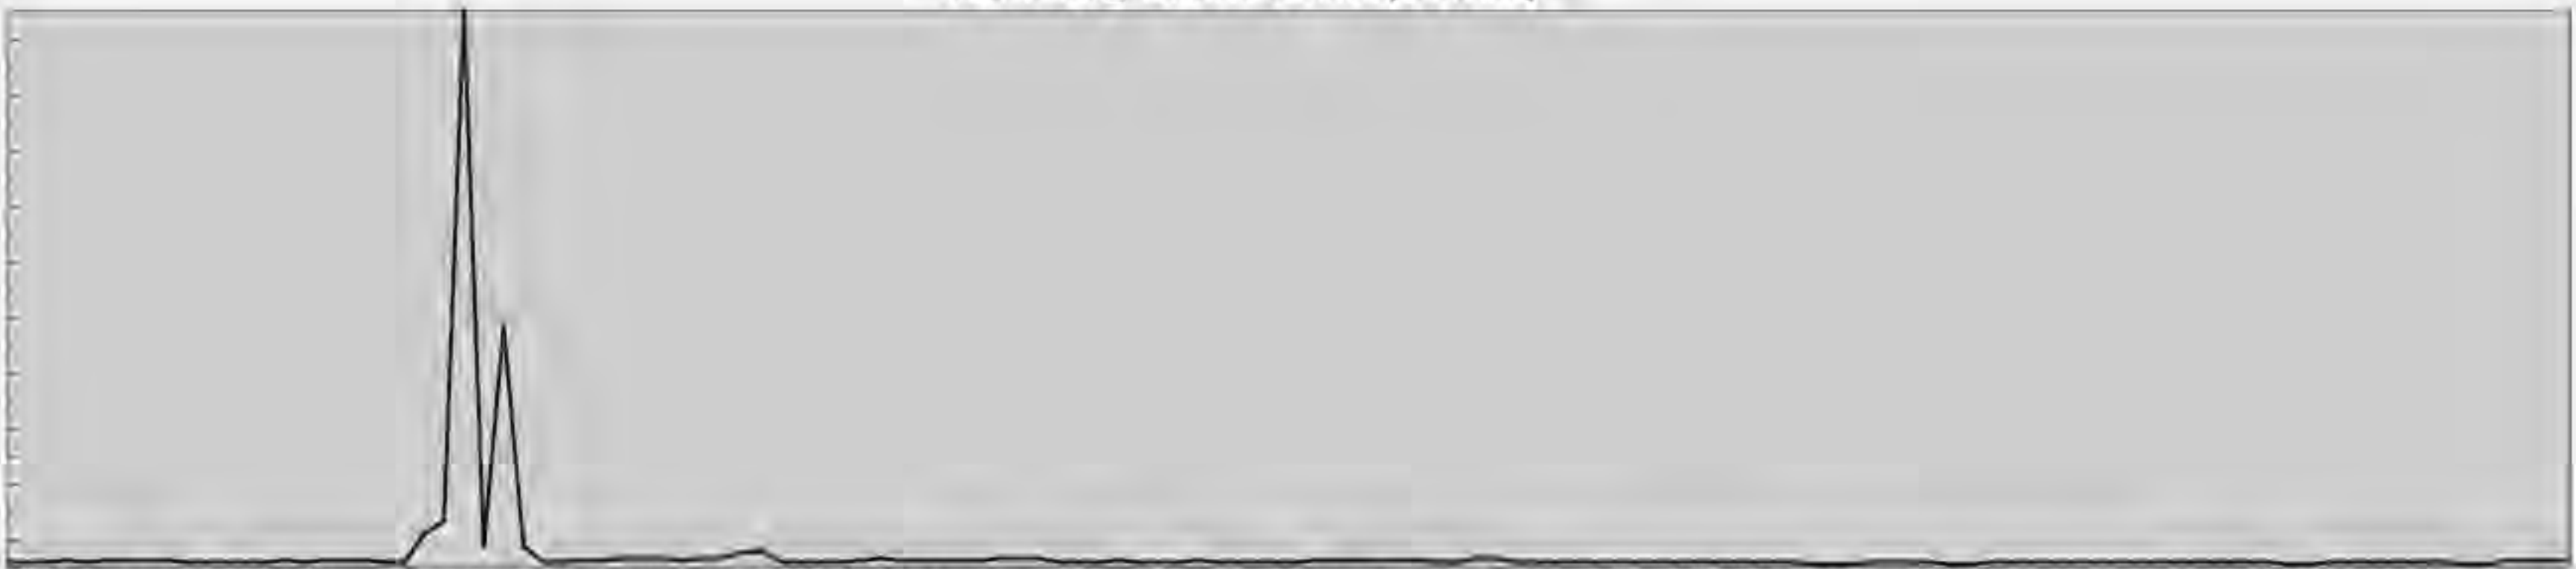

30-NALT GSM289411 CELL  
29-NALT GSM289410 CELL  
28-NALT GSM289409 CELL  
27-NALT GSM289408 CELL  
26-Color-d9 GSM1988105 CELL  
25-Color-d9 GSM1988104 CELL  
24-Color-d9 GSM1988103 CELL  
23-Color-d4 GSM1988102 CELL  
22-Color-d4 GSM1988101 CELL  
21-Intestine-large GSM258676 CELL  
20-Intestine-large GSM258675 CELL  
19-Intestine-small GSM258674 CELL  
18-Intestine-small GSM258673 CELL  
17-Lymph-nodes GSM258672 CELL  
16-Spleen GSM258671 CELL  
15-Spleen GSM258670 CELL  
14-Neuro2a GSM258669 CELL  
13-Astrocytes GSM241898 CELL  
12-ming GSM258667 CELL  
11-ming GSM258666 CELL  
10-MIMCD3 GSM258665 CELL  
09-MIMCD3 GSM258664 CELL  
08-Bruc4 GSM258663 CELL  
07-Bruc4 GSM258662 CELL  
06-Bruc4 GSM258661 CELL  
05-Osteoblast-d5 GSM258660 CELL  
04-Osteoblast-d5 GSM258659 CELL  
03-Osteoblast-d5 GSM258658 CELL  
02-Chondrocytes GSM258657 CELL  
01-Nat\_Helper cell GSM465594 CELL  
87-Nat\_Helper cell GSM465593 CELL  
86-LT cell GSM465592 CELL  
85-MS-1 GSM234692 CELL  
84-Lymph-endc-cells GSM143704 CELL  
83-P-FDC GSM481977 CELL  
82-P-FDC GSM481976 CELL  
81-P-FDC GSM481975 CELL  
80-LY RMLNDCC003001 CELL  
79-LY RMLNDCC003001 CELL  
78-Follicular-Bcells GSM258654 CELL  
77-Follicular-Bcells GSM258653 CELL  
76-MZ-Bcell GSM258652 CELL  
75-MZ-Bcell GSM258651 CELL  
74-BAF3 GSM258650 CELL  
73-BAF3 GSM258649 CELL  
72-Tregs GSM258648 CELL  
71-Tregs GSM258647 CELL  
70-T-cells-CD8+ GSM258646 CELL  
69-T-cells-CD8+ GSM258645 CELL  
68-T-cells-CD4+ GSM258644 CELL  
67-T-cells-CD4+ GSM258643 CELL  
66-Thymocyte-DN GSM465595 CELL  
65-Osteoclasts GSM258642 CELL  
64-Osteoclasts GSM258641 CELL  
63-Microglia GSM258640 CELL  
62-Microglia GSM258639 CELL  
61-MM-LPS-7h GSM258638 CELL  
60-MM-LPS-7h GSM258637 CELL  
59-MM-LPS-6h GSM258636 CELL  
58-MM-LPS-6h GSM258635 CELL  
57-MM-LPS-6h GSM258634 CELL  
56-MM-LPS-6h GSM258633 CELL  
55-MM-LPS-6h GSM258632 CELL  
54-MM-LPS-6h GSM258631 CELL  
53-MM-LPS-6h GSM258630 CELL  
52-MM-LPS-6h GSM258629 CELL  
51-MM-LPS-6h GSM258628 CELL  
50-CD8a-DC GSM258627 CELL  
49-CD8a-DC GSM258626 CELL  
48-CD8a+DC GSM258625 CELL  
47-NK-cells GSM258624 CELL  
46-NK-cells GSM258623 CELL  
45-Mast-cells-IgE+Ad GSM258622 CELL  
44-Mast-cells-IgE+Ad GSM258621 CELL  
43-Mast-cells-IgE GSM258620 CELL  
42-Mast-cells-IgE GSM258619 CELL  
41-Mast-cells-IgE GSM258618 CELL  
40-Granulocytes GSM258617 CELL  
39-Granulocytes GSM258616 CELL  
38-MP GSM258615 CELL  
37-MP GSM258614 CELL  
36-MP GSM258613 CELL  
35-MP GSM258612 CELL  
34-MP GSM258611 CELL  
33-MP GSM258610 CELL  
32-MP GSM258609 CELL  
31-MP GSM258608 CELL  
30-HSC GSM258607 CELL  
29-Bone marrow GSM258606 CELL  
28-Paneth-cells-GE GSM116357 CELL  
27-Paneth-cells-GE GSM116356 CELL  
26-Paneth-cells GSM116355 CELL  
25-Paneth-cells GSM116354 CELL  
24-Paneth-cells GSM116353 CELL  
23-Paneth-cells GSM116352 CELL  
22-Color-d9 GSM1988105 CELL  
21-Color-d9 GSM1988104 CELL  
20-Color-d9 GSM1988103 CELL  
19-Color-d9 GSM1988102 CELL  
18-Color-d9 GSM1988101 CELL  
17-Color-Vill GSM480362 CELL  
16-Color-Vill GSM480361 CELL  
15-Color-Vill GSM480360 CELL  
14-Color-Vill GSM480359 CELL  
13-Color-Vill GSM480358 CELL  
12-Color-Vill GSM480357 CELL  
11-Color-Vill GSM480356 CELL  
10-Color-Vill GSM480355 CELL  
09-Color-Vill GSM480354 CELL  
08-Color-Vill GSM480353 CELL  
07-Color-Vill GSM480352 CELL  
06-Color-Vill GSM480351 CELL  
05-Color-Vill GSM480350 CELL  
04-Color-Vill GSM480349 CELL  
03-Color-Vill GSM480348 CELL  
02-Color-Vill GSM480347 CELL  
01-Color-Vill GSM480346 CELL  
13-Small-intestine-epithelium RMINEP002001 CELL  
12-Small-intestine-epithelium RMINEP001001 CELL  
11-FAE RMPYEP002001 CELL  
10-FAE RMPYEP001001 CELL  
09-Ileum-IEC GSM190797 CELL  
08-Ileum-IEC GSM190796 CELL  
07-Ileum-IEC GSM190795 CELL  
06-Ileum-IEC GSM190794 CELL  
05-CT-w-M-cells GSM190793 CELL  
04-CT-w-M-cells GSM190792 CELL  
03-PP-M-cells GSM190791 CELL  
02-PP-M-cells GSM190790 CELL  
01-PP-M-cells GSM190789 CELL







Cluster0120\_Phagocyte-related (15 nodes)

4,746.4  
4,496.6  
4,246.8  
3,997  
3,747.2  
3,497.4  
3,247.6  
2,997.7  
2,747.9  
2,498.1  
2,248.3  
1,998.5  
1,748.7  
1,498.9  
1,249.1  
999.2  
749.4  
499.6  
249.8  
0

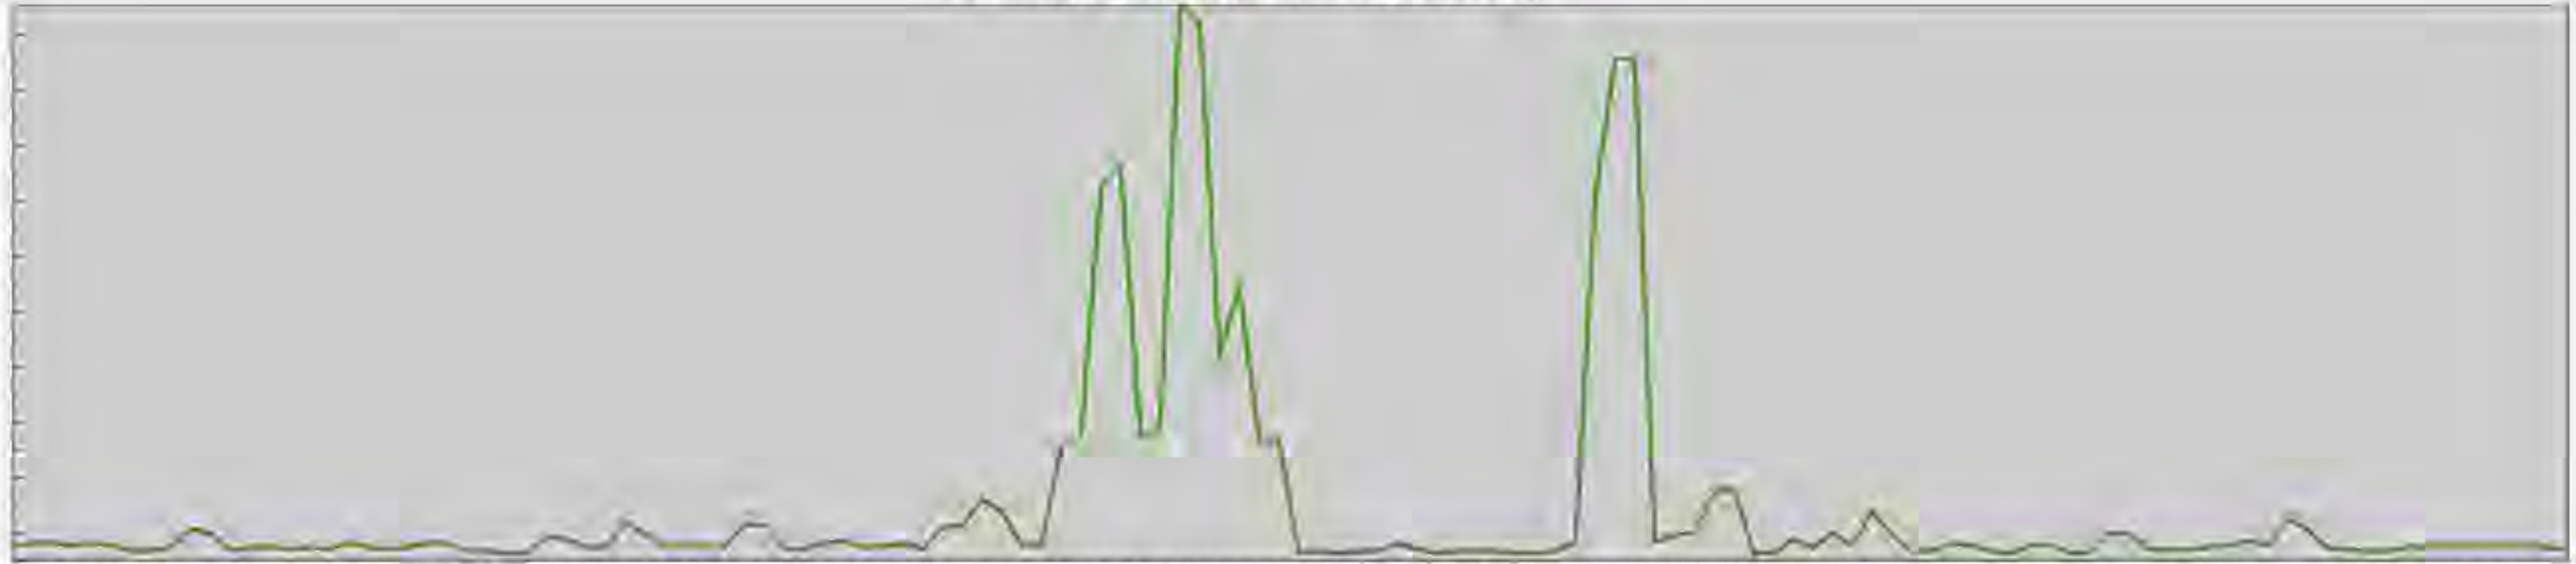

30- NALT GSM289411.CEL  
31- NALT GSM289410.CEL  
32- NALT GSM289409.CEL  
33- NALT GSM289408.CEL  
34- Colon-d9 GSM1988105.CEL  
35- Colon-d9 GSM1988104.CEL  
36- Colon-d9 GSM1988103.CEL  
37- Colon-d4 GSM1988102.CEL  
38- Colon-d4 GSM1988101.CEL  
39- Intestine-large GSM258675.CEL  
40- Intestine-large GSM258674.CEL  
41- Intestine-small GSM258673.CEL  
42- Intestine-small GSM258672.CEL  
43- Spleen GSM258767.CEL  
44- Neuro2a GSM258728.CEL  
45- Astrocytes GSM241898.CEL  
46- Lymph-nodes GSM258691.CEL  
47- Lymph-nodes GSM258690.CEL  
48- Lymph-nodes GSM258689.CEL  
49- mimb GSM258725.CEL  
50- mimb GSM258724.CEL  
51- MIMCD3 GSM258723.CEL  
52- MIMCD3 GSM258722.CEL  
53- Bruce4 GSM258656.CEL  
54- Bruce4 GSM258655.CEL  
55- C2C12 GSM258690.CEL  
56- C2C12 GSM258689.CEL  
57- NH3T3 GSM258739.CEL  
58- NH3T3 GSM258738.CEL  
59- 3T3-L1 GSM258610.CEL  
60- 3T3-L1 GSM258609.CEL  
61- OT12 GSM258632.CEL  
62- OT12 GSM258631.CEL  
63- Osteoblast-d21 GSM258740.CEL  
64- Osteoblast-d21 GSM258739.CEL  
65- Osteoblast-d14 GSM258738.CEL  
66- Osteoblast-d14 GSM258737.CEL  
67- Osteoblast-d5 GSM258742.CEL  
68- Osteoblast-d5 GSM258741.CEL  
69- Chondrocytes GSM266741.CEL  
70- Chondrocytes GSM266740.CEL  
71- Nat Helper cell GSM465594.CEL  
72- Nat Helper cell GSM465593.CEL  
73- L1 cell GSM465596.CEL  
74- MS-1 GSM234692.CEL  
75- MS-1 GSM143704.CEL  
76- Lymph-endo-cells GSM481977.CEL  
77- Lymph-endo-cells GSM481976.CEL  
78- PP-FDC GSM481978.CEL  
79- PP-FDC GSM481977.CEL  
80- PP-FDC GSM481976.CEL  
81- PP-FDC GSM481975.CEL  
82- FLY RMLNDCC002001.CEL  
83- FLY RMLNDCC002001.CEL  
84- FLY RMLNDCC002001.CEL  
85- FLY RMLNDCC002001.CEL  
86- Follicular-Bcells GSM258664.CEL  
87- Follicular-Bcells GSM258663.CEL  
88- MZ-Bcell GSM258627.CEL  
89- MZ-Bcell GSM258626.CEL  
90- BAF3 GSM258620.CEL  
91- BAF3 GSM258619.CEL  
92- Tregs GSM258778.CEL  
93- Tregs GSM258777.CEL  
94- Tregs GSM258776.CEL  
95- Tregs GSM258775.CEL  
96- Tregs GSM258774.CEL  
97- Tregs GSM258773.CEL  
98- T-cells-CD8+ GSM258744.CEL  
99- T-cells-CD8+ GSM258743.CEL  
100- T-cells-CD4+ GSM258745.CEL  
101- Thymocyte-DN GSM465595.CEL  
102- Osteoclasts GSM258743.CEL  
103- Osteoclasts GSM258742.CEL  
104- Microglia GSM258721.CEL  
105- Microglia GSM258720.CEL  
106- PMM-7h GSM258706.CEL  
107- PMM-7h GSM258705.CEL  
108- PMM-LPS-7h GSM258699.CEL  
109- PMM-LPS-7h GSM258698.CEL  
110- PMM-LPS-7h GSM258697.CEL  
111- PMM-LPS-7h GSM258696.CEL  
112- PMM-LPS-7h GSM258695.CEL  
113- PMM-LPS-7h GSM258694.CEL  
114- PMM-LPS-7h GSM258693.CEL  
115- PMM-LPS-7h GSM258692.CEL  
116- PMM-LPS-7h GSM258691.CEL  
117- PMM-LPS-7h GSM258690.CEL  
118- PMM-LPS-7h GSM258689.CEL  
119- PMM-LPS-7h GSM258688.CEL  
120- PMM-LPS-7h GSM258687.CEL  
121- PMM-LPS-7h GSM258686.CEL  
122- PMM-LPS-7h GSM258685.CEL  
123- PMM-LPS-7h GSM258684.CEL  
124- PMM-LPS-7h GSM258683.CEL  
125- PMM-LPS-7h GSM258682.CEL  
126- PMM-LPS-7h GSM258681.CEL  
127- PMM-LPS-7h GSM258680.CEL  
128- PMM-LPS-7h GSM258679.CEL  
129- PMM-LPS-7h GSM258678.CEL  
130- PMM-LPS-7h GSM258677.CEL  
131- PMM-LPS-7h GSM258676.CEL  
132- PMM-LPS-7h GSM258675.CEL  
133- PMM-LPS-7h GSM258674.CEL  
134- PMM-LPS-7h GSM258673.CEL  
135- PMM-LPS-7h GSM258672.CEL  
136- PMM-LPS-7h GSM258671.CEL  
137- PMM-LPS-7h GSM258670.CEL  
138- PMM-LPS-7h GSM258669.CEL  
139- PMM-LPS-7h GSM258668.CEL  
140- PMM-LPS-7h GSM258667.CEL  
141- PMM-LPS-7h GSM258666.CEL  
142- PMM-LPS-7h GSM258665.CEL  
143- PMM-LPS-7h GSM258664.CEL  
144- PMM-LPS-7h GSM258663.CEL  
145- PMM-LPS-7h GSM258662.CEL  
146- PMM-LPS-7h GSM258661.CEL  
147- PMM-LPS-7h GSM258660.CEL  
148- PMM-LPS-7h GSM258659.CEL  
149- PMM-LPS-7h GSM258658.CEL  
150- PMM-LPS-7h GSM258657.CEL



Cluster0121\_Large intestine-related (15 nodes)

1,045.7  
990.6  
935.6  
880.6  
825.5  
770.5  
715.5  
660.4  
605.4  
550.3  
495.3  
440.3  
385.2  
330.2  
275.2  
220.1  
165.1  
110.1  
55  
0

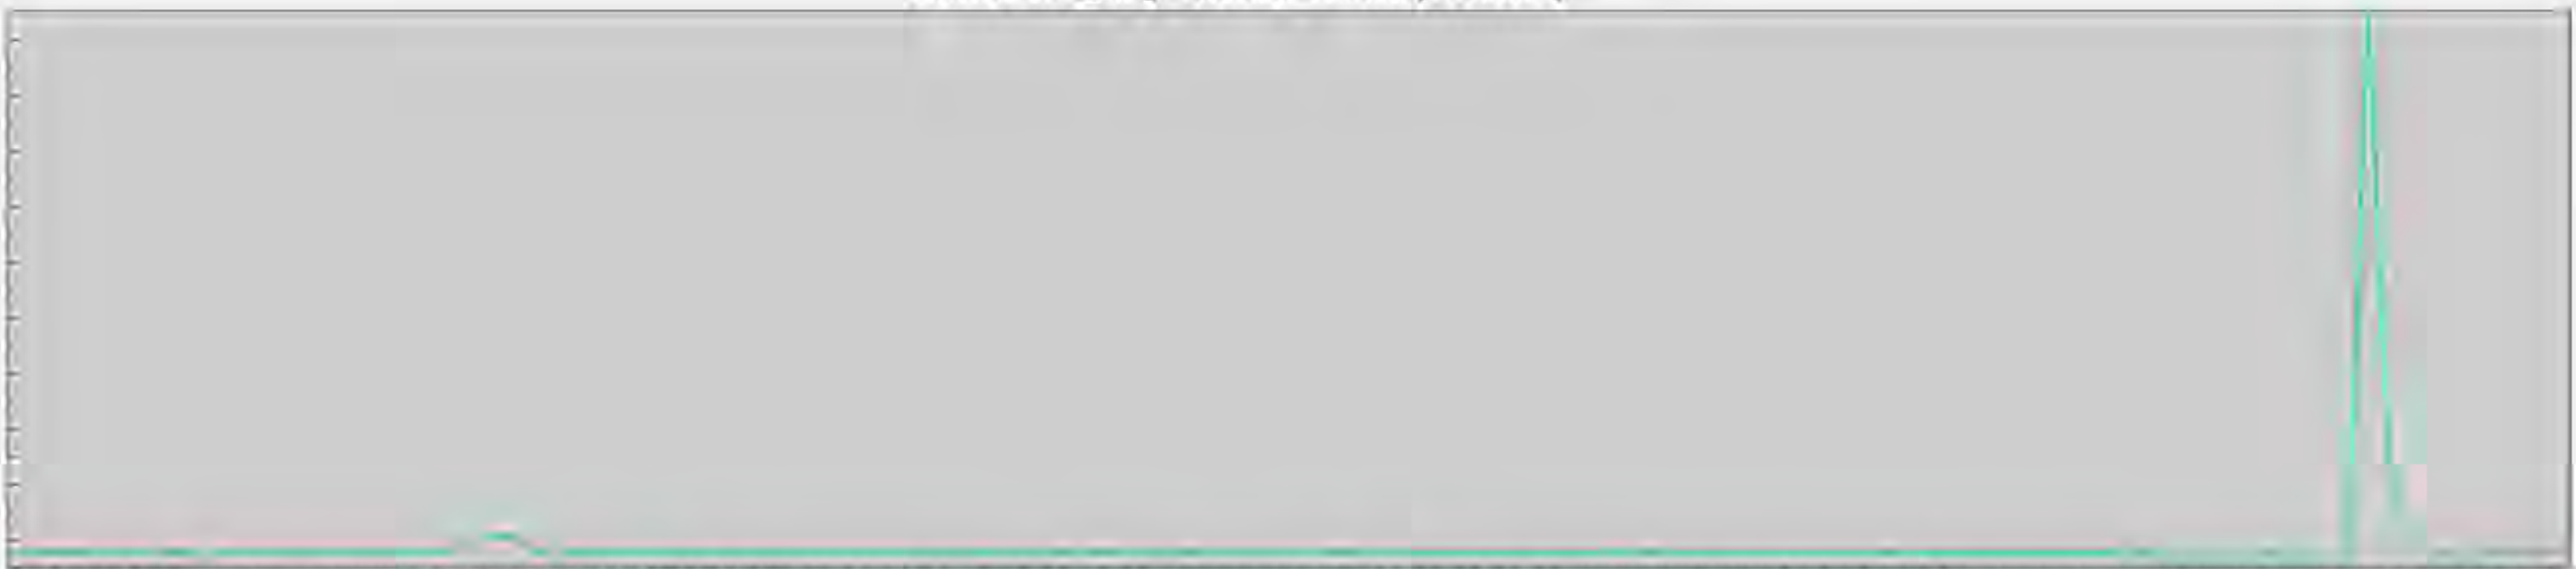

|     |                            |              |     |
|-----|----------------------------|--------------|-----|
| 01  | PP-M-cells                 | GSM190789    | CEL |
| 02  | PP-M-cells                 | GSM190790    | CEL |
| 03  | PP-M-cells                 | GSM190791    | CEL |
| 04  | CT-y-M-cells               | GSM190792    | CEL |
| 05  | CT-y-M-cells               | GSM190793    | CEL |
| 06  | CT-w-M-cells               | GSM190794    | CEL |
| 07  | Ileum-IEC                  | GSM190795    | CEL |
| 08  | Ileum-IEC                  | GSM190796    | CEL |
| 09  | Ileum-IEC                  | GSM190797    | CEL |
| 10  | FAE-RMP                    | GSM190798    | CEL |
| 11  | FAE-RMP                    | GSM190799    | CEL |
| 12  | Small-intestine-epithelium | RMINEP001001 | CEL |
| 13  | Small-intestine-epithelium | RMINEP002001 | CEL |
| 14  | Ileum-IEC                  | GSM350371    | CEL |
| 15  | Ileum-IEC                  | GSM350375    | CEL |
| 16  | Colon-IEC                  | GSM349880    | CEL |
| 17  | Colon-IEC                  | GSM349880    | CEL |
| 18  | Colon-Vill                 | GSM480362    | cel |
| 19  | Colon-Vill                 | GSM480363    | cel |
| 20  | Colon-Crypt                | GSM480374    | cel |
| 21  | Colon-Crypt                | GSM480375    | cel |
| 22  | Paneth-cells               | GSM318590    | CEL |
| 23  | Paneth-cells               | GSM318589    | CEL |
| 24  | Paneth-cells               | GSM116359    | CEL |
| 25  | Paneth-cells               | GSM116359    | CEL |
| 26  | Paneth-cells               | GSM116357    | CEL |
| 27  | Paneth-cells               | GSM116357    | CEL |
| 28  | Bone marrow                | GSM258627    | CEL |
| 29  | Bone marrow                | GSM258627    | CEL |
| 30  | NALT                       | GSM289411    | CEL |
| 31  | NALT                       | GSM289410    | CEL |
| 32  | NALT                       | GSM289409    | CEL |
| 33  | NALT                       | GSM289408    | CEL |
| 34  | Colon-d9                   | GSM198810    | CEL |
| 35  | Colon-d9                   | GSM198810    | CEL |
| 36  | Colon-d9                   | GSM198810    | CEL |
| 37  | Colon-d4                   | GSM198810    | CEL |
| 38  | Colon-d4                   | GSM198810    | CEL |
| 39  | Intestine-large            | GSM258675    | CEL |
| 40  | Intestine-large            | GSM258677    | CEL |
| 41  | Intestine-small            | GSM258691    | CEL |
| 42  | Intestine-small            | GSM258692    | CEL |
| 43  | Lymph-nodes                | GSM258691    | CEL |
| 44  | Spleen                     | GSM258678    | CEL |
| 45  | Spleen                     | GSM258679    | CEL |
| 46  | Neuro2a                    | GSM241898    | CEL |
| 47  | Neuro2a                    | GSM241898    | CEL |
| 48  | Astrocytes                 | GSM241898    | CEL |
| 49  | ming                       | GSM258726    | CEL |
| 50  | ming                       | GSM258725    | CEL |
| 51  | MIMCD3                     | GSM258724    | CEL |
| 52  | MIMCD3                     | GSM258723    | CEL |
| 53  | MIMCD3                     | GSM258723    | CEL |
| 54  | Brice4                     | GSM258690    | CEL |
| 55  | Brice4                     | GSM258690    | CEL |
| 56  | Brice4                     | GSM258690    | CEL |
| 57  | C2C12                      | GSM258730    | CEL |
| 58  | NH3T3                      | GSM258729    | CEL |
| 59  | NH3T3                      | GSM258729    | CEL |
| 60  | 3T3-L1                     | GSM258610    | CEL |
| 61  | 3T3-L1                     | GSM258609    | CEL |
| 62  | DT12                       | GSM258632    | CEL |
| 63  | DT12                       | GSM258631    | CEL |
| 64  | Osteoblast-d21             | GSM258740    | CEL |
| 65  | Osteoblast-d21             | GSM258739    | CEL |
| 66  | Osteoblast-d14             | GSM258738    | CEL |
| 67  | Osteoblast-d14             | GSM258737    | CEL |
| 68  | Osteoblast-d5              | GSM258742    | CEL |
| 69  | Osteoblast-d5              | GSM258741    | CEL |
| 70  | Chondrocytes               | GSM258674    | CEL |
| 71  | Chondrocytes               | GSM258674    | CEL |
| 72  | Nat Helper cell            | GSM465594    | CEL |
| 73  | Nat Helper cell            | GSM465593    | CEL |
| 74  | MS-1                       | GSM234692    | CEL |
| 75  | Lymph-endo-cells           | GSM143704    | CEL |
| 76  | FDC                        | GSM481977    | CEL |
| 77  | FDC                        | GSM481978    | CEL |
| 78  | FDC                        | GSM481978    | CEL |
| 79  | FDC                        | GSM481978    | CEL |
| 80  | FDC                        | GSM481978    | CEL |
| 81  | FDC                        | GSM481978    | CEL |
| 82  | FDC                        | GSM481978    | CEL |
| 83  | FDC                        | GSM481978    | CEL |
| 84  | FDC                        | GSM481978    | CEL |
| 85  | FDC                        | GSM481978    | CEL |
| 86  | FDC                        | GSM481978    | CEL |
| 87  | FDC                        | GSM481978    | CEL |
| 88  | FDC                        | GSM481978    | CEL |
| 89  | FDC                        | GSM481978    | CEL |
| 90  | FDC                        | GSM481978    | CEL |
| 91  | FDC                        | GSM481978    | CEL |
| 92  | FDC                        | GSM481978    | CEL |
| 93  | FDC                        | GSM481978    | CEL |
| 94  | FDC                        | GSM481978    | CEL |
| 95  | FDC                        | GSM481978    | CEL |
| 96  | FDC                        | GSM481978    | CEL |
| 97  | FDC                        | GSM481978    | CEL |
| 98  | FDC                        | GSM481978    | CEL |
| 99  | FDC                        | GSM481978    | CEL |
| 100 | FDC                        | GSM481978    | CEL |
| 101 | FDC                        | GSM481978    | CEL |
| 102 | FDC                        | GSM481978    | CEL |
| 103 | FDC                        | GSM481978    | CEL |
| 104 | FDC                        | GSM481978    | CEL |
| 105 | FDC                        | GSM481978    | CEL |
| 106 | FDC                        | GSM481978    | CEL |
| 107 | FDC                        | GSM481978    | CEL |
| 108 | FDC                        | GSM481978    | CEL |
| 109 | FDC                        | GSM481978    | CEL |
| 110 | FDC                        | GSM481978    | CEL |
| 111 | FDC                        | GSM481978    | CEL |
| 112 | FDC                        | GSM481978    | CEL |
| 113 | FDC                        | GSM481978    | CEL |
| 114 | FDC                        | GSM481978    | CEL |
| 115 | FDC                        | GSM481978    | CEL |
| 116 | FDC                        | GSM481978    | CEL |
| 117 | FDC                        | GSM481978    | CEL |
| 118 | FDC                        | GSM481978    | CEL |
| 119 | FDC                        | GSM481978    | CEL |
| 120 | FDC                        | GSM481978    | CEL |
| 121 | FDC                        | GSM481978    | CEL |
| 122 | FDC                        | GSM481978    | CEL |
| 123 | FDC                        | GSM481978    | CEL |
| 124 | FDC                        | GSM481978    | CEL |
| 125 | FDC                        | GSM481978    | CEL |
| 126 | FDC                        | GSM481978    | CEL |
| 127 | FDC                        | GSM481978    | CEL |
| 128 | FDC                        | GSM481978    | CEL |
| 129 | FDC                        | GSM481978    | CEL |
| 130 | FDC                        | GSM481978    | CEL |
| 131 | FDC                        | GSM481978    | CEL |
| 132 | FDC                        | GSM481978    | CEL |
| 133 | FDC                        | GSM481978    | CEL |
| 134 | FDC                        | GSM481978    | CEL |
| 135 | FDC                        | GSM481978    | CEL |
| 136 | FDC                        | GSM481978    | CEL |
| 137 | FDC                        | GSM481978    | CEL |
| 138 | FDC                        | GSM481978    | CEL |
| 139 | FDC                        | GSM481978    | CEL |
| 140 | FDC                        | GSM481978    | CEL |
| 141 | FDC                        | GSM481978    | CEL |
| 142 | FDC                        | GSM481978    | CEL |
| 143 | FDC                        | GSM481978    | CEL |
| 144 | FDC                        | GSM481978    | CEL |
| 145 | FDC                        | GSM481978    | CEL |
| 146 | FDC                        | GSM481978    | CEL |
| 147 | FDC                        | GSM481978    | CEL |
| 148 | FDC                        | GSM481978    | CEL |
| 149 | FDC                        | GSM481978    | CEL |
| 150 | FDC                        | GSM481978    | CEL |
| 151 | FDC                        | GSM481978    | CEL |
| 152 | FDC                        | GSM481978    | CEL |
| 153 | FDC                        | GSM481978    | CEL |
| 154 | FDC                        | GSM481978    | CEL |
| 155 | FDC                        | GSM481978    | CEL |
| 156 | FDC                        | GSM481978    | CEL |
| 157 | FDC                        | GSM481978    | CEL |
| 158 | FDC                        | GSM481978    | CEL |
| 159 | FDC                        | GSM481978    | CEL |
| 160 | FDC                        | GSM481978    | CEL |
| 161 | FDC                        | GSM481978    | CEL |
| 162 | FDC                        | GSM481978    | CEL |
| 163 | FDC                        | GSM481978    | CEL |
| 164 | FDC                        | GSM481978    | CEL |
| 165 | FDC                        | GSM481978    | CEL |
| 166 | FDC                        | GSM481978    | CEL |
| 167 | FDC                        | GSM481978    | CEL |
| 168 | FDC                        | GSM481978    | CEL |
| 169 | FDC                        | GSM481978    | CEL |
| 170 | FDC                        | GSM481978    | CEL |
| 171 | FDC                        | GSM481978    | CEL |
| 172 | FDC                        | GSM481978    | CEL |
| 173 | FDC                        | GSM481978    | CEL |
| 174 | FDC                        | GSM481978    | CEL |
| 175 | FDC                        | GSM481978    | CEL |
| 176 | FDC                        | GSM481978    | CEL |
| 177 | FDC                        | GSM481978    | CEL |
| 178 | FDC                        | GSM481978    | CEL |
| 179 | FDC                        | GSM481978    | CEL |
| 180 | FDC                        | GSM481978    | CEL |
| 181 | FDC                        | GSM481978    | CEL |
| 182 | FDC                        | GSM481978    | CEL |
| 183 | FDC                        | GSM481978    | CEL |
| 184 | FDC                        | GSM481978    | CEL |
| 185 | FDC                        | GSM481978    | CEL |
| 186 | FDC                        | GSM481978    | CEL |
| 187 | FDC                        | GSM481978    | CEL |
| 188 | FDC                        | GSM481978    | CEL |
| 189 | FDC                        | GSM481978    | CEL |
| 190 | FDC                        | GSM481978    | CEL |
| 191 | FDC                        | GSM481978    | CEL |
| 192 | FDC                        | GSM481978    | CEL |
| 193 | FDC                        | GSM481978    | CEL |
| 194 | FDC                        | GSM481978    | CEL |
| 195 | FDC                        | GSM481978    | CEL |
| 196 | FDC                        | GSM481978    | CEL |
| 197 | FDC                        | GSM481978    | CEL |
| 198 | FDC                        | GSM481978    | CEL |
| 199 | FDC                        | GSM481978    | CEL |
| 200 | FDC                        | GSM481978    | CEL |



Cluster0122\_High in astrocytes and osteoblasts (15 nodes)

1,683.2  
1,594.6  
1,506  
1,417.4  
1,328.6  
1,240.3  
1,151.7  
1,063.1  
974.5  
885.9  
797.3  
708.7  
620.1  
531.5  
442.9  
354.4  
265.8  
177.2  
88.6  
0

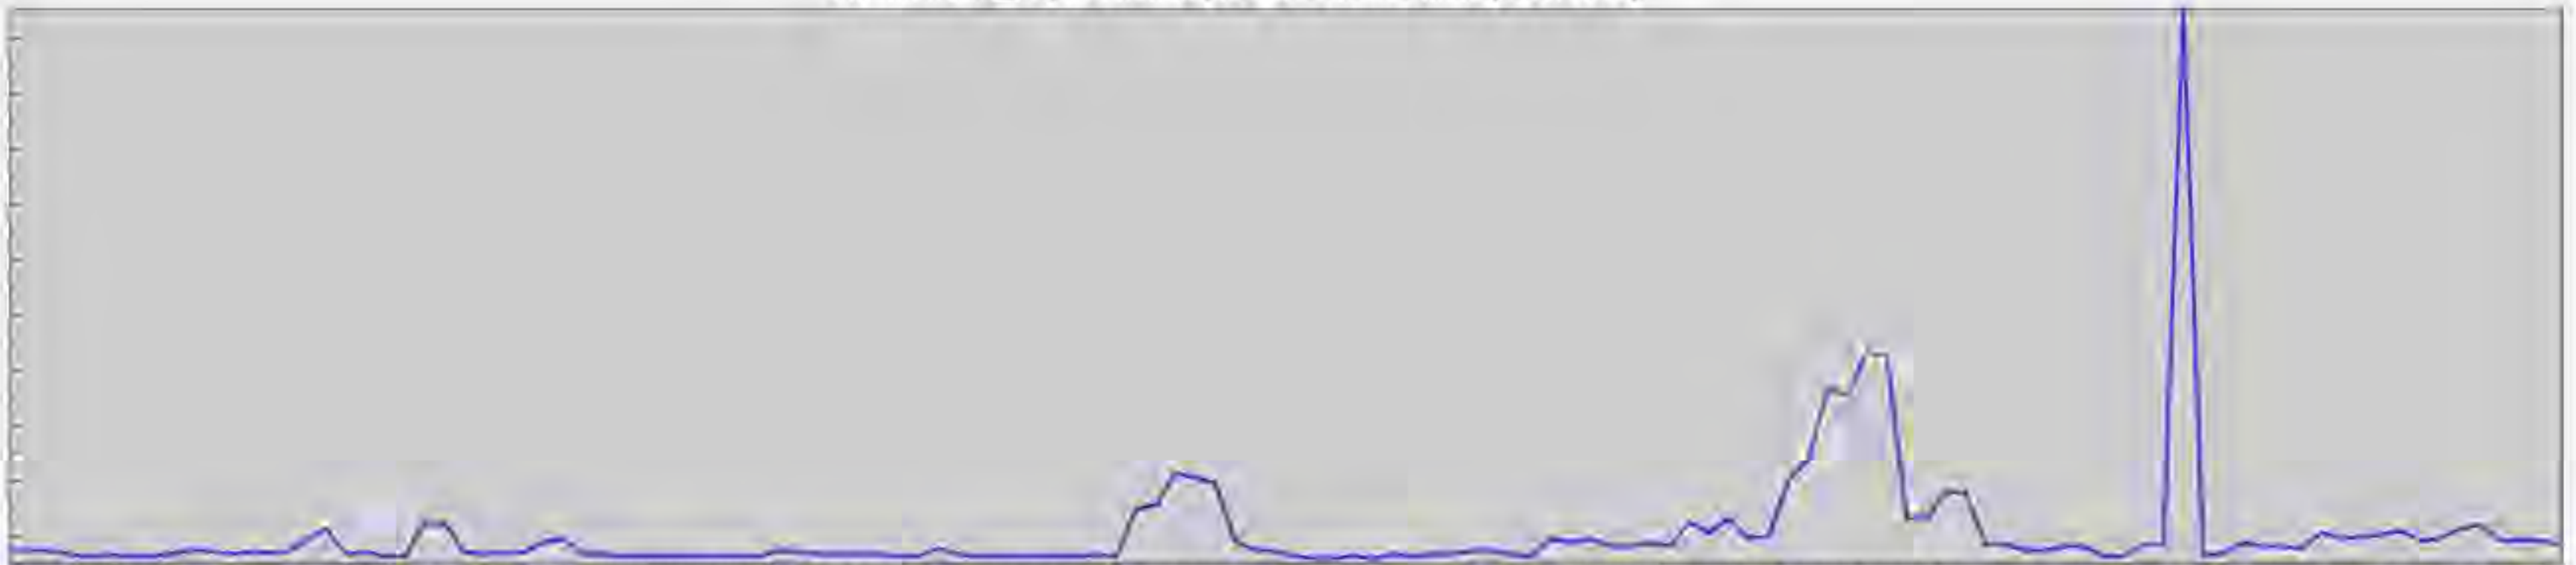

01-PP-M-cells\_GSM190789.CEL  
02-PP-M-cells\_GSM190790.CEL  
03-PP-M-cells\_GSM190791.CEL  
04-PP-M-cells\_GSM190792.CEL  
05-CT-v-M-cells\_GSM190793.CEL  
06-CT-v-M-cells\_GSM190794.CEL  
07-Ileum-IEC\_GSM190795.CEL  
08-Ileum-IEC\_GSM190796.CEL  
09-Ileum-IEC\_GSM190797.CEL  
10-FAE-RMPYEP001001.CEL  
11-FAE-RMPYEP002001.CEL  
12-Small-intestine-epithelium\_RMINEP001001.CEL  
13-Small-intestine-epithelium\_RMINEP002001.CEL  
14-Ileum-IEC\_GSM350371.CEL  
15-Ileum-IEC\_GSM350375.CEL  
16-Colon-IEC-Gf\_GSM349880.CEL  
17-Colon-IEC-Gf\_GSM350375.CEL  
18-Colon-Vill-GSM480362.CEL  
19-Colon-Vill-GSM480363.CEL  
20-Colon-Crypt-GSM480374.CEL  
21-Colon-Crypt-GSM480375.CEL  
22-Paneth-cells\_GSM318590.CEL  
23-Paneth-cells\_GSM318591.CEL  
24-Paneth-cells\_GSM116359.CEL  
25-Paneth-cells\_GSM116359.CEL  
26-Paneth-cells-Gf-1-GSM116357.CEL  
27-Paneth-cells-Gf-1-GSM116357.CEL  
28-Paneth-cells-Gf-1-GSM116358.CEL  
29-Bone marrow\_GSM258627.CEL  
30-HSC\_GSM258770.CEL  
31-HSC\_GSM258770.CEL  
32-MEP\_GSM258770.CEL  
33-MEP\_GSM258770.CEL  
34-MEP\_GSM258770.CEL  
35-CMP\_GSM258642.CEL  
36-CMP\_GSM258642.CEL  
37-GMP\_GSM258665.CEL  
38-GMP\_GSM258665.CEL  
39-Granulocytes\_GSM258667.CEL  
40-Granulocytes\_GSM258667.CEL  
41-Mast-cells\_GSM258712.CEL  
42-Mast-cells-Gf\_GSM258712.CEL  
43-Mast-cells-Gf\_GSM258712.CEL  
44-Mast-cells-Gf-Ad-GSM258719.CEL  
45-Mast-cells-Gf-Ad-GSM258719.CEL  
46-NK-cells\_GSM258732.CEL  
47-NK-cells\_GSM258732.CEL  
48-CD8a+DC\_GSM258646.CEL  
49-CD8a+DC\_GSM258646.CEL  
50-CD8a-DC\_GSM258647.CEL  
51-CD8a-DC\_GSM258647.CEL  
52-Plasmacytoid-DC\_GSM258650.CEL  
53-Plasmacytoid-DC\_GSM258650.CEL  
54-BMM-GSM258694.CEL  
55-BMM-GSM258694.CEL  
56-BMM-LPS-6h-GSM258700.CEL  
57-BMM-LPS-6h-GSM258700.CEL  
58-BMM-LPS-7h-GSM258702.CEL  
59-BMM-LPS-7h-GSM258702.CEL  
60-Microglia\_GSM258721.CEL  
61-Microglia\_GSM258721.CEL  
62-Osteoclasts\_GSM258743.CEL  
63-Osteoclasts\_GSM258743.CEL  
64-Thymocyte-DN\_GSM465595.CEL  
65-Thymocyte-DN\_GSM465595.CEL  
66-T-cells-CD4+\_GSM258773.CEL  
67-T-cells-CD4+\_GSM258773.CEL  
68-T-cells-CD8+\_GSM258774.CEL  
69-T-cells-CD8+\_GSM258774.CEL  
70-T-cells-CD8+\_GSM258776.CEL  
71-T-cells-CD8+\_GSM258776.CEL  
72-Tregs\_GSM258778.CEL  
73-Tregs\_GSM258778.CEL  
74-BAF3\_GSM258620.CEL  
75-BAF3\_GSM258620.CEL  
76-MZ-Bcell\_GSM258622.CEL  
77-MZ-Bcell\_GSM258622.CEL  
78-Follicular-Bcells\_GSM258664.CEL  
79-Follicular-Bcells\_GSM258664.CEL  
80-L-Y-RMLNDC002001.CEL  
81-L-Y-RMLNDC003001.CEL  
82-L-Y-RMLNDC003001.CEL  
83-PP-FDC\_GSM481978.CEL  
84-PP-FDC\_GSM481978.CEL  
85-PP-FDC\_GSM481978.CEL  
86-MS-1\_GSM234692.CEL  
87-Nat Helper cell\_GSM465593.CEL  
88-Nat Helper cell\_GSM465593.CEL  
89-LT cell\_GSM465596.CEL  
89-LT cell\_GSM465596.CEL  
90-Chondrocytes\_GSM258741.CEL  
91-Chondrocytes\_GSM258741.CEL  
92-Osteoblast-d5\_GSM258742.CEL  
93-Osteoblast-d5\_GSM258742.CEL  
94-Osteoblast-d14\_GSM258738.CEL  
95-Osteoblast-d14\_GSM258738.CEL  
96-Osteoblast-d21\_GSM258740.CEL  
97-Osteoblast-d21\_GSM258740.CEL  
98-10T1/2-GSM258631.CEL  
99-10T1/2-GSM258631.CEL  
99-3T3-L1\_GSM258610.CEL  
100-3T3-L1\_GSM258610.CEL  
101-NH3T3-GSM258739.CEL  
102-NH3T3-GSM258739.CEL  
103-C2C12-GSM258629.CEL  
104-C2C12-GSM258629.CEL  
106-Bruce4-GSM258690.CEL  
107-MIMCD3-GSM258723.CEL  
108-MIMCD3-GSM258723.CEL  
109-mim6-GSM258725.CEL  
110-mim6-GSM258725.CEL  
111-Astrocytes\_GSM241898.CEL  
112-Astrocytes\_GSM241898.CEL  
113-Spleen\_GSM258768.CEL  
114-Spleen\_GSM258768.CEL  
115-Lymph-nodes\_GSM258679.CEL  
116-Lymph-nodes\_GSM258679.CEL  
117-Lymph-nodes\_GSM258691.CEL  
118-Lymph-nodes\_GSM258691.CEL  
119-Intestine-small\_GSM258677.CEL  
120-Intestine-large\_GSM258677.CEL  
121-Intestine-large\_GSM258676.CEL  
122-Intestine-large\_GSM258675.CEL  
123-Colon-d4-GSM198810.CEL  
124-Colon-d4-GSM198810.CEL  
125-Colon-d9-GSM198810.CEL  
126-Colon-d9-GSM198810.CEL  
127-NALT\_GSM289408.CEL  
128-NALT\_GSM289408.CEL  
129-NALT\_GSM289410.CEL  
130-NALT\_GSM289411.CEL







Cluster0124\_intestine-related (15 nodes)

4,161.4  
3,942.4  
3,723.4  
3,504.3  
3,285.3  
3,068.3  
2,847.3  
2,628.3  
2,409.2  
2,190.2  
1,971.2  
1,752.2  
1,533.2  
1,314.1  
1,095.1  
876.1  
657.1  
438  
219  
0

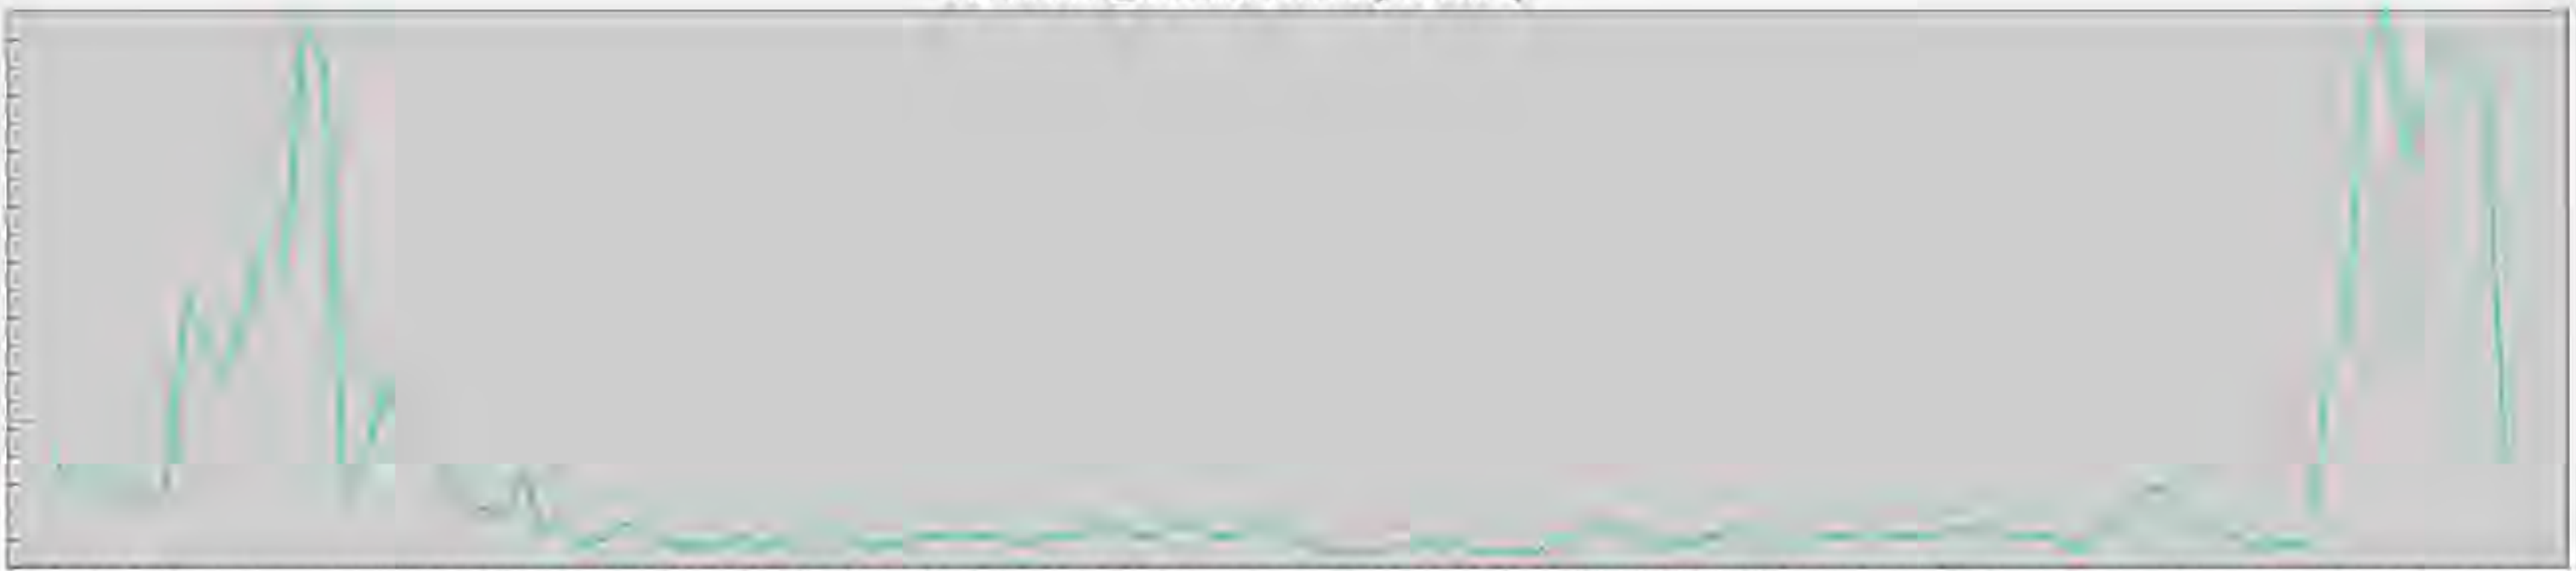

130-NALT GSM289411.CEL  
129-NALT GSM289410.CEL  
128-NALT GSM289409.CEL  
127-NALT GSM289408.CEL  
126-Colon-d9 GSM1988105.CEL  
125-Colon-d9 GSM1988104.CEL  
124-Colon-d9 GSM1988103.CEL  
123-Colon-d4 GSM1988102.CEL  
122-Colon-d4 GSM1988101.CEL  
121-Intestine-large GSM258676.CEL  
120-Intestine-large GSM258675.CEL  
119-Intestine-small GSM258677.CEL  
118-Intestine-small GSM258692.CEL  
117-Lymph-nodes GSM258691.CEL  
116-Lymph-nodes GSM258726.CEL  
115-Spleen GSM258767.CEL  
114-Spleen GSM258767.CEL  
113-Neuro2a GSM258728.CEL  
112-Neuro2a GSM258727.CEL  
111-Astrocytes GSM2418998.CEL  
110-mim6 GSM258726.CEL  
109-mim6 GSM258725.CEL  
108-MIMCD3 GSM258724.CEL  
107-MIMCD3 GSM258723.CEL  
106-Bruce4 GSM258665.CEL  
105-Bruce4 GSM258665.CEL  
104-C2C12 GSM258690.CEL  
103-C2C12 GSM258629.CEL  
102-NH3T3 GSM258730.CEL  
101-NH3T3 GSM258729.CEL  
100-3T3-L1 GSM258610.CEL  
99-3T3-L1 GSM258609.CEL  
98-10T12 GSM258632.CEL  
97-10T12 GSM258631.CEL  
96-Osteoblast-d21 GSM258740.CEL  
95-Osteoblast-d21 GSM258739.CEL  
94-Osteoblast-d14 GSM258738.CEL  
93-Osteoblast-d14 GSM258737.CEL  
92-Osteoblast-d5 GSM258742.CEL  
91-Osteoblast-d5 GSM258741.CEL  
90-Chondrocytes GSM266741.CEL  
89-Chondrocytes GSM266740.CEL  
88-Nat Helper cell GSM465594.CEL  
87-Nat Helper cell GSM465593.CEL  
86-LT cell GSM465596.CEL  
85-MS-1 GSM234692.CEL  
84-Lymph-endo-cells GSM143704.CEL  
83-PP-FDC GSM481977.CEL  
82-PP-FDC GSM481978.CEL  
81-PP-FDC GSM481976.CEL  
80-L-Y RMLNDCC003001.CEL  
79-L-Y RMLNDCC003001.CEL  
78-Follicular-Bcells GSM258664.CEL  
77-Follicular-Bcells GSM258663.CEL  
76-MZ-Bcell GSM258627.CEL  
75-MZ-Bcell GSM258627.CEL  
74-BAF3 GSM258620.CEL  
73-BAF3 GSM258619.CEL  
72-Tregs GSM258778.CEL  
71-Tregs GSM258777.CEL  
70-T-cells-CD8+ GSM258776.CEL  
69-T-cells-CD8+ GSM258774.CEL  
68-T-cells-CD4+ GSM258773.CEL  
67-T-cells-CD4+ GSM258773.CEL  
66-Thymocyte-DN GSM465595.CEL  
65-Osteoclasts GSM258743.CEL  
64-Osteoclasts GSM258743.CEL  
63-Microglia GSM258721.CEL  
62-Microglia GSM258721.CEL  
61-PM-M-PS-7h GSM268706.CEL  
60-PM-M-PS-7h GSM268706.CEL  
59-PM-M-PS-7h GSM268705.CEL  
58-PM-M-PS-6h GSM258702.CEL  
57-PM-M-PS-6h GSM258702.CEL  
56-PM-M-PS-6h GSM258699.CEL  
55-PM-M-PS-6h GSM258699.CEL  
54-PM-M-PS-6h GSM258694.CEL  
53-PM-M-PS-6h GSM258694.CEL  
52-PM-M-PS-6h GSM258694.CEL  
51-PM-M-PS-6h GSM258694.CEL  
50-CD8a-DC GSM258647.CEL  
49-CD8a-DC GSM258647.CEL  
48-CD8a+DC GSM258646.CEL  
47-NK-cells GSM258732.CEL  
46-NK-cells GSM258732.CEL  
45-Mast-cells-IgE+Ad GSM258718.CEL  
44-Mast-cells-IgE+Ad GSM258717.CEL  
43-Mast-cells-IgE GSM258714.CEL  
42-Mast-cells-IgE GSM258713.CEL  
41-Mast-cells GSM258712.CEL  
40-Granulocytes GSM258668.CEL  
39-Granulocytes GSM258667.CEL  
38-GMP GSM258666.CEL  
37-GMP GSM258666.CEL  
36-GMP GSM258666.CEL  
35-CMP GSM258642.CEL  
34-CMP GSM258642.CEL  
33-MEP GSM258720.CEL  
32-MEP GSM258719.CEL  
31-HESC GSM258770.CEL  
30-HESC GSM258770.CEL  
29-Bone marrow GSM258628.CEL  
28-Bone marrow GSM258627.CEL  
27-paneth-cells-GE GSM116358.CEL  
26-paneth-cells-GE GSM116357.CEL  
25-paneth-cells GSM116350.CEL  
24-paneth-cells GSM116359.CEL  
23-paneth-cells GSM318589.CEL  
22-paneth-cells GSM318590.CEL  
21-paneth-cells GSM318590.CEL  
20-Colon-Crypt GSM480375.CEL  
19-Colon-Vill GSM480363.CEL  
18-Colon-Vill GSM480362.CEL  
17-Colon-IEC-GE GSM349880.CEL  
16-Colon-IEC-GE GSM350375.CEL  
15-Ileum-IEC-TGF GSM350376.CEL  
14-Ileum-IEC GSM350371.CEL  
13-Small-intestine-epithelium RMINEP002001.CEL  
12-Small-intestine-epithelium RMINEP001001.CEL  
11-FAE-RMPYEP002001.CEL  
10-FAE-RMPYEP001001.CEL  
09-Ileum-IEC GSM190797.CEL  
08-Ileum-IEC GSM190796.CEL  
07-Ileum-IEC GSM190795.CEL  
06-CT-v-M-cells GSM190794.CEL  
05-CT-v-M-cells GSM190793.CEL  
04-PP-M-cells GSM190792.CEL  
03-PP-M-cells GSM190791.CEL  
02-PP-M-cells GSM190790.CEL  
01-PP-M-cells GSM190789.CEL







Cluster0126\_High in osteoclasts (15 nodes)

3,454.9  
3,273.1  
3,091.3  
2,909.4  
2,727.6  
2,545.7  
2,363.9  
2,182.1  
2,000.2  
1,818.4  
1,636.6  
1,454.7  
1,272.9  
1,091  
909.2  
727.4  
545.5  
363.7  
181.8  
0

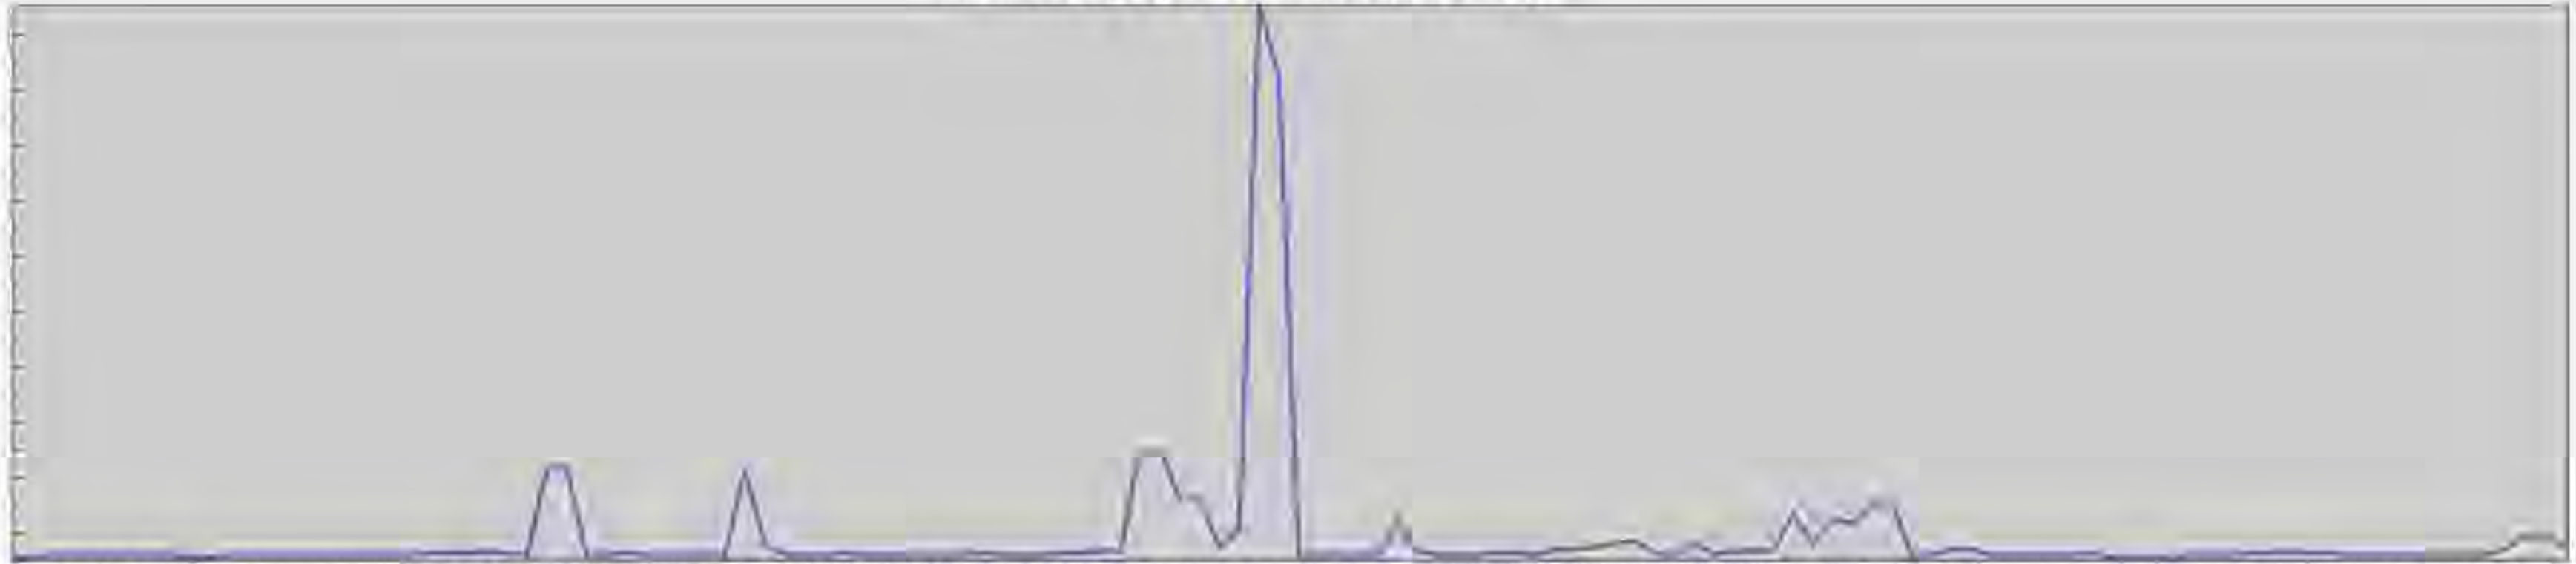

130-NALT GSM289411 CELL  
129-NALT GSM289410 CELL  
128-NALT GSM289409 CELL  
127-NALT GSM289408 CELL  
126-Color-d9 GSM1988105 CELL  
125-Color-d9 GSM1988103 CELL  
124-Color-d9 GSM1988102 CELL  
123-Color-d4 GSM1988101 CELL  
122-Color-d4 GSM1988101 CELL  
121-Intestine-large GSM258676 CELL  
120-Intestine-large GSM258675 CELL  
119-Intestine-small GSM258678 CELL  
118-Intestine-small GSM258692 CELL  
117-Lymph-nodes GSM258691 CELL  
116-Spleen GSM258766 CELL  
115-Spleen GSM258767 CELL  
114-Spleen GSM258768 CELL  
113-Neuro2a GSM258728 CELL  
112-Neuro2a GSM258727 CELL  
111-Astrocytes GSM241898 CELL  
110-mimb GSM258726 CELL  
109-mimb GSM258725 CELL  
108-MIMCD3 GSM258724 CELL  
107-MIMCD3 GSM258723 CELL  
106-Bruce4 GSM258656 CELL  
105-Bruce4 GSM258655 CELL  
104-C2C12 GSM258690 CELL  
103-C2C12 GSM258689 CELL  
102-NH3T3 GSM258730 CELL  
101-NH3T3 GSM258729 CELL  
100-3T3-L1 GSM258610 CELL  
99-3T3-L1 GSM258609 CELL  
98-10T12 GSM258632 CELL  
97-10T12 GSM258631 CELL  
96-Osteoblast-d21 GSM258740 CELL  
95-Osteoblast-d21 GSM258739 CELL  
94-Osteoblast-d14 GSM258738 CELL  
93-Osteoblast-d14 GSM258737 CELL  
92-Osteoblast-d5 GSM258742 CELL  
91-Osteoblast-d5 GSM258741 CELL  
90-Chondrocytes GSM266741 CELL  
89-Chondrocytes GSM266740 CELL  
88-Nat Helper cell GSM465594 CELL  
87-Nat Helper cell GSM465593 CELL  
86-T cell GSM465596 CELL  
85-MS-1 GSM234692 CELL  
84-Lymph-endo-cells GSM143704 CELL  
83-P-FDC GSM481977 CELL  
82-P-FDC GSM481978 CELL  
81-P-FDC GSM481976 CELL  
80-L-Y RMLNDCC003001 CELL  
79-L-Y RMLNDCC003001 CELL  
78-Follicular-Bcells GSM258664 CELL  
77-Follicular-Bcells GSM258663 CELL  
76-MZ-Bcell GSM258622 CELL  
75-MZ-Bcell GSM258621 CELL  
74-BAF3 GSM258620 CELL  
73-BAF3 GSM258619 CELL  
72-Tregs GSM258778 CELL  
71-Tregs GSM258777 CELL  
70-T-cells-CD8+ GSM258776 CELL  
69-T-cells-CD8+ GSM258774 CELL  
68-T-cells-CD4+ GSM258773 CELL  
67-T-cells-CD4+ GSM258744 CELL  
66-Thymocyte-DN GSM465595 CELL  
65-Osteoclasts GSM258743 CELL  
64-Microglia GSM258721 CELL  
63-Microglia GSM258721 CELL  
62-MM-LPS-7h GSM258706 CELL  
61-MM-LPS-7h GSM258706 CELL  
60-MM-LPS-6h GSM258702 CELL  
59-MM-LPS-6h GSM258701 CELL  
58-MM-LPS-6h GSM258699 CELL  
57-MM-LPS-6h GSM258699 CELL  
56-MM-LPS-6h GSM258694 CELL  
55-Ismacryoid-DC GSM258650 CELL  
54-Ismacryoid-DC GSM258649 CELL  
53-CD8a-DC GSM258648 CELL  
52-CD8a-DC GSM258647 CELL  
51-CD8a-DC GSM258647 CELL  
50-CD8a+DC GSM258646 CELL  
49-CD8a+DC GSM258646 CELL  
48-NK-cells GSM258732 CELL  
47-NK-cells GSM258731 CELL  
46-Mast-cells-IgE+Ad GSM258719 CELL  
45-Mast-cells-IgE+Ad GSM258718 CELL  
44-Mast-cells-IgE GSM258714 CELL  
43-Mast-cells-IgE GSM258713 CELL  
42-Mast-cells-IgE GSM258712 CELL  
41-Mast-cells GSM258712 CELL  
40-Granulocytes GSM258667 CELL  
39-Granulocytes GSM258666 CELL  
38-GMP GSM258665 CELL  
37-GMP GSM258665 CELL  
36-GMP GSM258664 CELL  
35-GMP GSM258642 CELL  
34-MPEP GSM258641 CELL  
33-MPEP GSM258641 CELL  
32-MPEP GSM258770 CELL  
31-HSC GSM258770 CELL  
30-Bone marrow GSM258628 CELL  
29-Bone marrow GSM258627 CELL  
28-Paneth-cells-GE GSM116358 CELL  
27-Paneth-cells-GE GSM116357 CELL  
26-Paneth-cells-GE GSM116350 CELL  
25-Paneth-cells GSM116359 CELL  
24-Paneth-cells GSM116359 CELL  
23-Paneth-cells GSM318589 CELL  
22-Paneth-cells GSM318590 CELL  
21-Color-Crypt GSM480375 cel  
20-Color-Crypt GSM480374 cel  
19-Color-Vill GSM480363 cel  
18-Color-Vill GSM480362 cel  
17-Color-IEC-Gf GSM349880 CELL  
16-Color-IEC-Gf GSM350375 CELL  
15-Ileum-IEC-Gf GSM350376 CELL  
14-Ileum-IEC GSM350371 CELL  
13-Small-intestine-epithelium RMINEP002901 CELL  
12-Small-intestine-epithelium RMINEP001001 CELL  
11-FAE-RMPYEP002001 CELL  
10-FAE-RMPYEP001001 CELL  
09-Ileum-IEC GSM190797 CELL  
08-Ileum-IEC GSM190796 CELL  
07-Ileum-IEC GSM190795 CELL  
06-CT-w-M-cells GSM190794 CELL  
05-CT-y-M-cells GSM190793 CELL  
04-PP-M-cells GSM190792 CELL  
03-PP-M-cells GSM190791 CELL  
02-PP-M-cells GSM190790 CELL  
01-PP-M-cells GSM190789 CELL



Cluster0127\_High in bone marrow progenitors (15 nodes)

1,142.9  
1,082.7  
1,022.6  
962.4  
802.3  
842.1  
782  
721.8  
661.7  
601.5  
541.4  
481.2  
421.1  
360.9  
300.8  
240.6  
180.5  
120.3  
60.2  
0

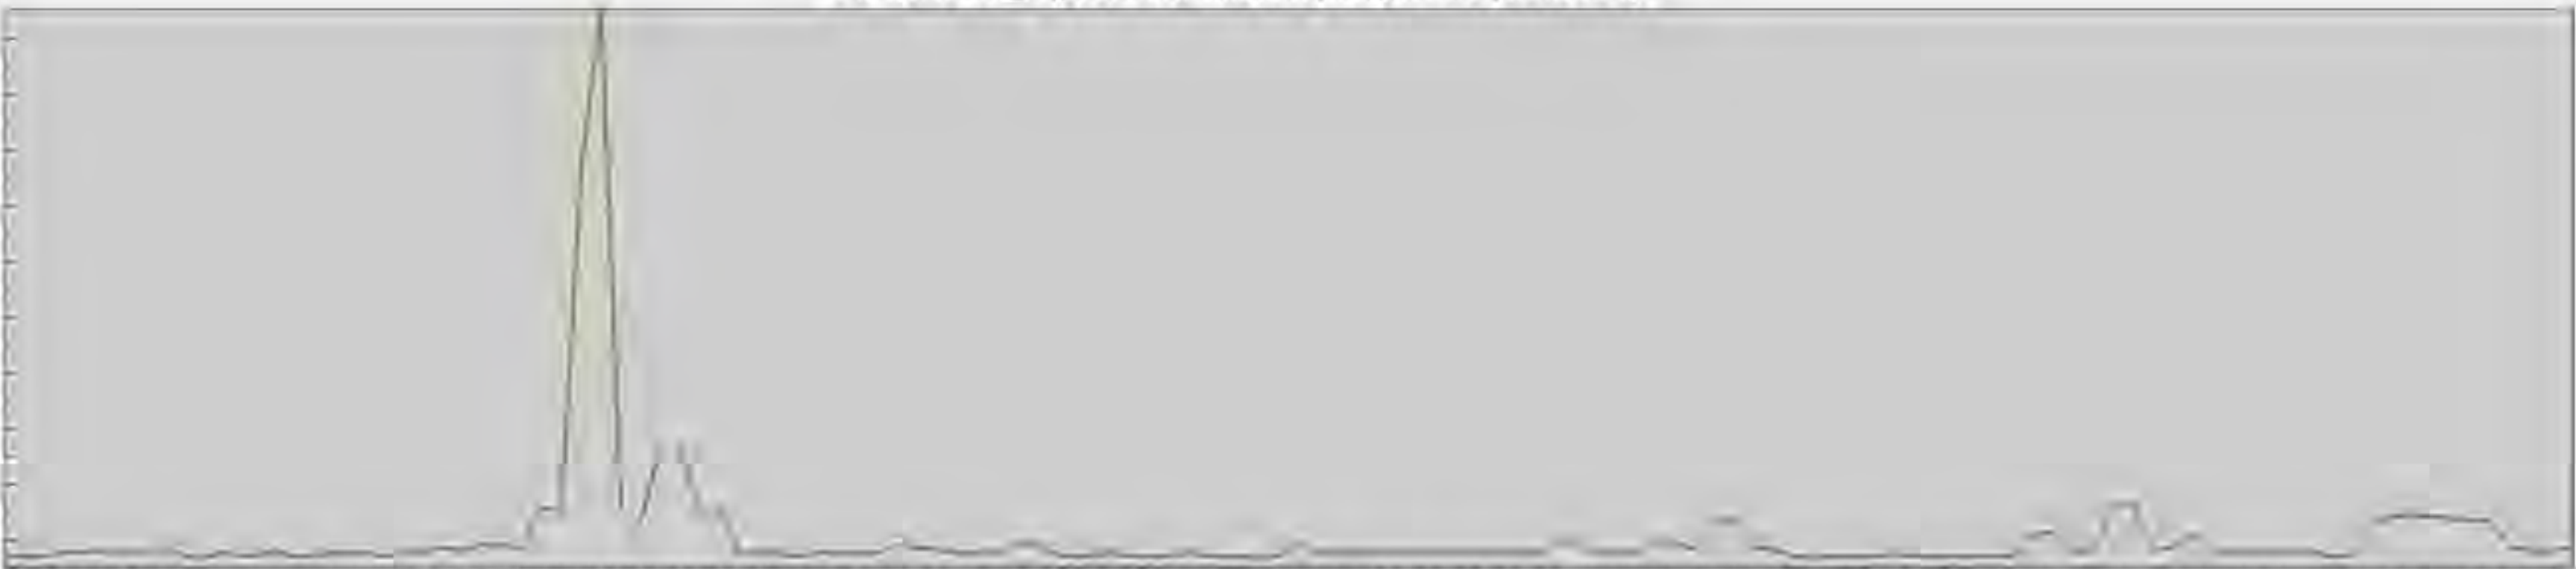

|                                            |     |        |
|--------------------------------------------|-----|--------|
| 01-PP-M-cells_GSM190789                    | CEL | 258650 |
| 02-PP-M-cells_GSM190790                    | CEL | 258649 |
| 03-PP-M-cells_GSM190791                    | CEL | 258648 |
| 04-CT-Y-M-cells_GSM190792                  | CEL | 258647 |
| 05-CT-Y-M-cells_GSM190793                  | CEL | 258646 |
| 06-CT-W-M-cells_GSM190794                  | CEL | 258645 |
| 07-Ileum-EC_GSM190795                      | CEL | 258644 |
| 08-Ileum-EC_GSM190796                      | CEL | 258643 |
| 09-Ileum-EC_GSM190797                      | CEL | 258642 |
| 10-FAE-RMPYEP001001                        | CEL | 258641 |
| 11-FAE-RMPYEP002001                        | CEL | 258640 |
| 12-Small-intestine-epithelium_RMINEP001001 | CEL | 258639 |
| 13-Small-intestine-epithelium_RMINEP002001 | CEL | 258638 |
| 14-Ileum-EC_GSM350371                      | CEL | 258637 |
| 15-Ileum-EC_GSM350375                      | CEL | 258636 |
| 16-Colon-VIII_GSM480362                    | cel | 258635 |
| 17-Colon-VIII_GSM480363                    | cel | 258634 |
| 18-Colon-VIII_GSM480364                    | cel | 258633 |
| 19-Colon-VIII_GSM480365                    | cel | 258632 |
| 20-Colon-Crypt_GSM480374                   | cel | 258631 |
| 21-Colon-Crypt_GSM480375                   | cel | 258630 |
| 22-Paneth-cells_GSM318589                  | CEL | 258629 |
| 23-Paneth-cells_GSM318590                  | CEL | 258628 |
| 24-Paneth-cells_GSM116359                  | CEL | 258627 |
| 25-Paneth-cells_GSM116360                  | CEL | 258626 |
| 26-Paneth-cells-GF-1-GSM116357             | CEL | 258625 |
| 27-Paneth-cells-GF-1-GSM116358             | CEL | 258624 |
| 28-Bone marrow_GSM258627                   | CEL | 258623 |
| 29-Bone marrow_GSM258628                   | CEL | 258622 |
| 30-HSC_GSM258629                           | CEL | 258621 |
| 31-HSC_GSM258630                           | CEL | 258620 |
| 32-MEP_GSM258631                           | CEL | 258619 |
| 33-MEP_GSM258632                           | CEL | 258618 |
| 34-MEP_GSM258633                           | CEL | 258617 |
| 35-CMP_GSM258634                           | CEL | 258616 |
| 36-CMP_GSM258635                           | CEL | 258615 |
| 37-GMP_GSM258636                           | CEL | 258614 |
| 38-GMP_GSM258637                           | CEL | 258613 |
| 39-Granulocytes_GSM258638                  | CEL | 258612 |
| 40-Granulocytes_GSM258639                  | CEL | 258611 |
| 41-Mast-cells_GSM258640                    | CEL | 258610 |
| 42-Mast-cells-GM-1-GSM258641               | CEL | 258609 |
| 43-Mast-cells-GM-1-GSM258642               | CEL | 258608 |
| 44-Mast-cells-GM-1-GSM258643               | CEL | 258607 |
| 45-Mast-cells-GM-1-GSM258644               | CEL | 258606 |
| 46-NK-cells_GSM258645                      | CEL | 258605 |
| 47-NK-cells_GSM258646                      | CEL | 258604 |
| 48-CD8a+DC_GSM258647                       | CEL | 258603 |
| 49-CD8a+DC_GSM258648                       | CEL | 258602 |
| 50-CD8a+DC_GSM258649                       | CEL | 258601 |
| 51-CD8a+DC_GSM258650                       | CEL | 258600 |
| 52-CD8a+DC_GSM258651                       | CEL | 258599 |
| 53-CD8a+DC_GSM258652                       | CEL | 258598 |
| 54-CD8a+DC_GSM258653                       | CEL | 258597 |
| 55-CD8a+DC_GSM258654                       | CEL | 258596 |
| 56-CD8a+DC_GSM258655                       | CEL | 258595 |
| 57-CD8a+DC_GSM258656                       | CEL | 258594 |
| 58-CD8a+DC_GSM258657                       | CEL | 258593 |
| 59-CD8a+DC_GSM258658                       | CEL | 258592 |
| 60-CD8a+DC_GSM258659                       | CEL | 258591 |
| 61-CD8a+DC_GSM258660                       | CEL | 258590 |
| 62-CD8a+DC_GSM258661                       | CEL | 258589 |
| 63-CD8a+DC_GSM258662                       | CEL | 258588 |
| 64-CD8a+DC_GSM258663                       | CEL | 258587 |
| 65-CD8a+DC_GSM258664                       | CEL | 258586 |
| 66-CD8a+DC_GSM258665                       | CEL | 258585 |
| 67-CD8a+DC_GSM258666                       | CEL | 258584 |
| 68-CD8a+DC_GSM258667                       | CEL | 258583 |
| 69-CD8a+DC_GSM258668                       | CEL | 258582 |
| 70-CD8a+DC_GSM258669                       | CEL | 258581 |
| 71-CD8a+DC_GSM258670                       | CEL | 258580 |
| 72-CD8a+DC_GSM258671                       | CEL | 258579 |
| 73-CD8a+DC_GSM258672                       | CEL | 258578 |
| 74-CD8a+DC_GSM258673                       | CEL | 258577 |
| 75-CD8a+DC_GSM258674                       | CEL | 258576 |
| 76-CD8a+DC_GSM258675                       | CEL | 258575 |
| 77-CD8a+DC_GSM258676                       | CEL | 258574 |
| 78-CD8a+DC_GSM258677                       | CEL | 258573 |
| 79-CD8a+DC_GSM258678                       | CEL | 258572 |
| 80-CD8a+DC_GSM258679                       | CEL | 258571 |
| 81-CD8a+DC_GSM258680                       | CEL | 258570 |
| 82-CD8a+DC_GSM258681                       | CEL | 258569 |
| 83-CD8a+DC_GSM258682                       | CEL | 258568 |
| 84-CD8a+DC_GSM258683                       | CEL | 258567 |
| 85-CD8a+DC_GSM258684                       | CEL | 258566 |
| 86-CD8a+DC_GSM258685                       | CEL | 258565 |
| 87-CD8a+DC_GSM258686                       | CEL | 258564 |
| 88-CD8a+DC_GSM258687                       | CEL | 258563 |
| 89-CD8a+DC_GSM258688                       | CEL | 258562 |
| 90-CD8a+DC_GSM258689                       | CEL | 258561 |
| 91-CD8a+DC_GSM258690                       | CEL | 258560 |
| 92-CD8a+DC_GSM258691                       | CEL | 258559 |
| 93-CD8a+DC_GSM258692                       | CEL | 258558 |
| 94-CD8a+DC_GSM258693                       | CEL | 258557 |
| 95-CD8a+DC_GSM258694                       | CEL | 258556 |
| 96-CD8a+DC_GSM258695                       | CEL | 258555 |
| 97-CD8a+DC_GSM258696                       | CEL | 258554 |
| 98-CD8a+DC_GSM258697                       | CEL | 258553 |
| 99-CD8a+DC_GSM258698                       | CEL | 258552 |
| 100-CD8a+DC_GSM258699                      | CEL | 258551 |
| 101-CD8a+DC_GSM258700                      | CEL | 258550 |
| 102-CD8a+DC_GSM258701                      | CEL | 258549 |
| 103-CD8a+DC_GSM258702                      | CEL | 258548 |
| 104-CD8a+DC_GSM258703                      | CEL | 258547 |
| 105-CD8a+DC_GSM258704                      | CEL | 258546 |
| 106-CD8a+DC_GSM258705                      | CEL | 258545 |
| 107-CD8a+DC_GSM258706                      | CEL | 258544 |
| 108-CD8a+DC_GSM258707                      | CEL | 258543 |
| 109-CD8a+DC_GSM258708                      | CEL | 258542 |
| 110-CD8a+DC_GSM258709                      | CEL | 258541 |
| 111-CD8a+DC_GSM258710                      | CEL | 258540 |
| 112-CD8a+DC_GSM258711                      | CEL | 258539 |
| 113-CD8a+DC_GSM258712                      | CEL | 258538 |
| 114-CD8a+DC_GSM258713                      | CEL | 258537 |
| 115-CD8a+DC_GSM258714                      | CEL | 258536 |
| 116-CD8a+DC_GSM258715                      | CEL | 258535 |
| 117-CD8a+DC_GSM258716                      | CEL | 258534 |
| 118-CD8a+DC_GSM258717                      | CEL | 258533 |
| 119-CD8a+DC_GSM258718                      | CEL | 258532 |
| 120-CD8a+DC_GSM258719                      | CEL | 258531 |
| 121-CD8a+DC_GSM258720                      | CEL | 258530 |
| 122-CD8a+DC_GSM258721                      | CEL | 258529 |
| 123-CD8a+DC_GSM258722                      | CEL | 258528 |
| 124-CD8a+DC_GSM258723                      | CEL | 258527 |
| 125-CD8a+DC_GSM258724                      | CEL | 258526 |
| 126-CD8a+DC_GSM258725                      | CEL | 258525 |
| 127-CD8a+DC_GSM258726                      | CEL | 258524 |
| 128-CD8a+DC_GSM258727                      | CEL | 258523 |
| 129-CD8a+DC_GSM258728                      | CEL | 258522 |
| 130-CD8a+DC_GSM258729                      | CEL | 258521 |



Cluster0128\_High in all haematopoietic cells (15 nodes)

2,838.5  
2,687.2  
2,638  
2,388.7  
2,238.4  
2,090.1  
1,940.8  
1,791.5  
1,642.2  
1,492.9  
1,343.6  
1,194.3  
1,045  
895.7  
746.5  
597.2  
447.9  
298.6  
149.3  
0

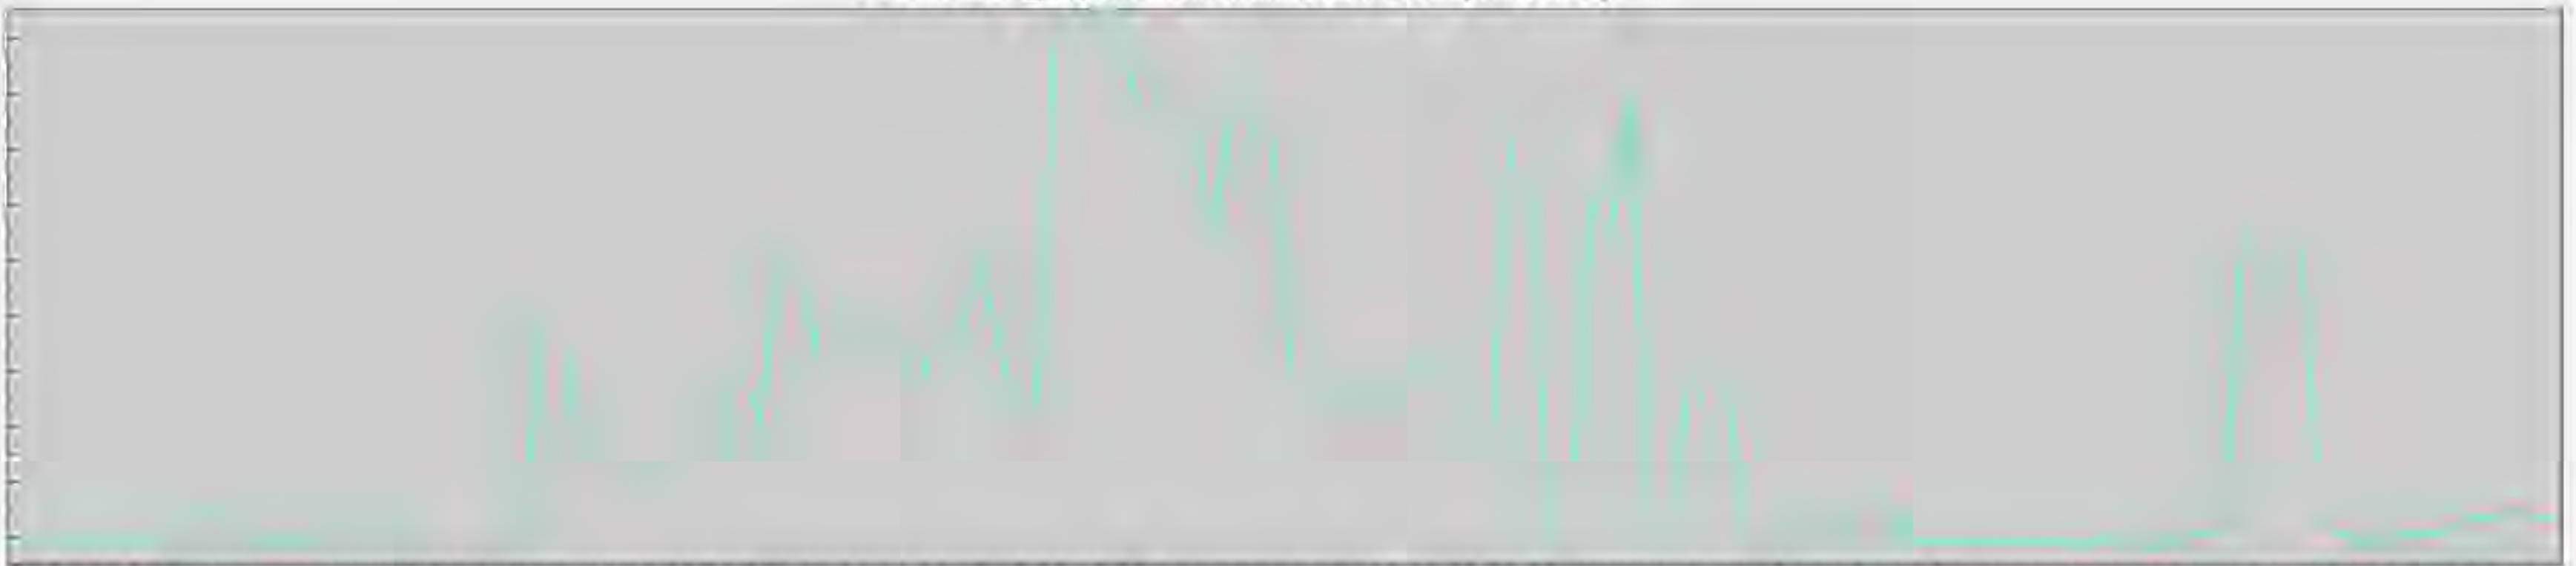

130-NALT GSM289411 CEL  
129-NALT GSM289410 CEL  
128-NALT GSM289409 CEL  
127-NALT GSM289408 CEL  
126-CD9 GSM1988105 CEL  
125-CD9 GSM1988104 CEL  
124-CD9 GSM1988103 CEL  
123-CD9 GSM1988102 CEL  
122-CD9 GSM1988101 CEL  
121-Intestine-large GSM258676 CEL  
120-Intestine-large GSM258675 CEL  
119-Intestine-small GSM258674 CEL  
118-Intestine-small GSM258673 CEL  
117-Lymph-nodes GSM258672 CEL  
116-Spleen GSM258768 CEL  
115-Spleen GSM258767 CEL  
114-Spleen GSM258766 CEL  
113-Neuro2a GSM258728 CEL  
112-Neuro2a GSM258727 CEL  
111-Astrocytes GSM241898 CEL  
110-mim6 GSM258726 CEL  
109-mim6 GSM258725 CEL  
108-MIMCD3 GSM258724 CEL  
107-MIMCD3 GSM258723 CEL  
106-Bruce4 GSM258665 CEL  
105-Bruce4 GSM258664 CEL  
104-C2C12 GSM258690 CEL  
103-C2C12 GSM258689 CEL  
102-NH3T3 GSM258730 CEL  
101-NH3T3 GSM258729 CEL  
100-3T3-L1 GSM258610 CEL  
99-3T3-L1 GSM258609 CEL  
98-10T12 GSM258632 CEL  
97-10T12 GSM258631 CEL  
96-Osteoblast-d21 GSM258740 CEL  
95-Osteoblast-d21 GSM258739 CEL  
94-Osteoblast-d14 GSM258738 CEL  
93-Osteoblast-d14 GSM258737 CEL  
92-Osteoblast-d5 GSM258742 CEL  
91-Osteoblast-d5 GSM258741 CEL  
90-Chondrocytes GSM266741 CEL  
89-Chondrocytes GSM266740 CEL  
88-Nat Helper cell GSM465594 CEL  
87-Nat Helper cell GSM465593 CEL  
86-TT cell GSM465596 CEL  
85-MS-1 GSM234692 CEL  
84-Lymph-endo-cells GSM143704 CEL  
83-PP-FDC GSM481977 CEL  
82-PP-FDC GSM481978 CEL  
81-PP-FDC GSM481976 CEL  
80-D-LY RMLNDCC003001 CEL  
79-D-LY RMLNDCC003001 CEL  
78-Follicular-Bcells GSM258664 CEL  
77-Follicular-Bcells GSM258663 CEL  
76-MZ-Bcell GSM258627 CEL  
75-MZ-Bcell GSM258627 CEL  
74-BAF3 GSM258620 CEL  
73-BAF3 GSM258619 CEL  
72-Tregs GSM258778 CEL  
71-Tregs GSM258777 CEL  
70-T-cells-CD8+ GSM258776 CEL  
69-T-cells-CD8+ GSM258774 CEL  
68-T-cells-CD4+ GSM258773 CEL  
67-T-cells-CD4+ GSM258744 CEL  
66-Thymocyte-DN GSM465595 CEL  
65-Osteoclasts GSM258743 CEL  
64-Osteoclasts GSM258743 CEL  
63-Microglia GSM258721 CEL  
62-Microglia GSM258721 CEL  
61-PM-M-PS-7h GSM258706 CEL  
60-PM-M-PS-7h GSM258706 CEL  
59-PM-M-PS-7h GSM258702 CEL  
58-PM-M-PS-6h GSM258700 CEL  
57-PM-M-PS-6h GSM258699 CEL  
56-PM-M-PS-6h GSM258699 CEL  
55-PM-M-PS-6h GSM258699 CEL  
54-PM-M-PS-6h GSM258699 CEL  
53-PM-M-PS-6h GSM258699 CEL  
52-PM-M-PS-6h GSM258699 CEL  
51-PM-M-PS-6h GSM258699 CEL  
50-PM-M-PS-6h GSM258699 CEL  
49-PM-M-PS-6h GSM258699 CEL  
48-PM-M-PS-6h GSM258699 CEL  
47-PM-M-PS-6h GSM258699 CEL  
46-NK-cells GSM258732 CEL  
45-NK-cells GSM258732 CEL  
44-Mast-cells-IgE+Ad GSM258718 CEL  
43-Mast-cells-IgE+Ad GSM258717 CEL  
42-Mast-cells-IgE GSM258714 CEL  
41-Mast-cells-IgE GSM258713 CEL  
40-Granulocytes GSM258712 CEL  
39-Granulocytes GSM258668 CEL  
38-Granulocytes GSM258667 CEL  
37-GMP GSM258666 CEL  
36-GMP GSM258666 CEL  
35-GMP GSM258666 CEL  
34-GMP GSM258666 CEL  
33-MEP GSM258720 CEL  
32-MEP GSM258720 CEL  
31-MEP GSM258720 CEL  
30-HSC GSM258770 CEL  
29-Bone marrow GSM258628 CEL  
28-Bone marrow GSM258627 CEL  
27-paneth-cells-GF-1 GSM116357 CEL  
26-paneth-cells-GF-1 GSM116350 CEL  
25-paneth-cells-GF-1 GSM116350 CEL  
24-paneth-cells-GSM116359 CEL  
23-paneth-cells-GSM116359 CEL  
22-paneth-cells-GSM318589 CEL  
21-paneth-cells-GSM318589 CEL  
20-paneth-cells-GSM318589 CEL  
19-Colon-Crypt GSM480375 cel  
18-Colon-Vill GSM480363 cel  
17-Colon-Vill GSM480362 cel  
16-Colon-IEC-GF GSM349880 CEL  
15-Colon-IEC-GF GSM350375 CEL  
14-Ileum-IEC GSM350376 CEL  
13-Ileum-IEC GSM350371 CEL  
12-Small-intestine-epithelium RMINEP002001 CEL  
11-Small-intestine-epithelium RMINEP001001 CEL  
10-FAE-RMPYEP001001 CEL  
9-Ileum-IEC GSM190797 CEL  
8-Ileum-IEC GSM190796 CEL  
7-Ileum-IEC GSM190795 CEL  
6-CT-v-M-cells GSM190794 CEL  
5-CT-v-M-cells GSM190793 CEL  
4-CT-v-M-cells GSM190792 CEL  
3-PP-M-cells GSM190791 CEL  
2-PP-M-cells GSM190790 CEL  
1-PP-M-cells GSM190789 CEL



Cluster0129\_Uncertain (15 nodes)

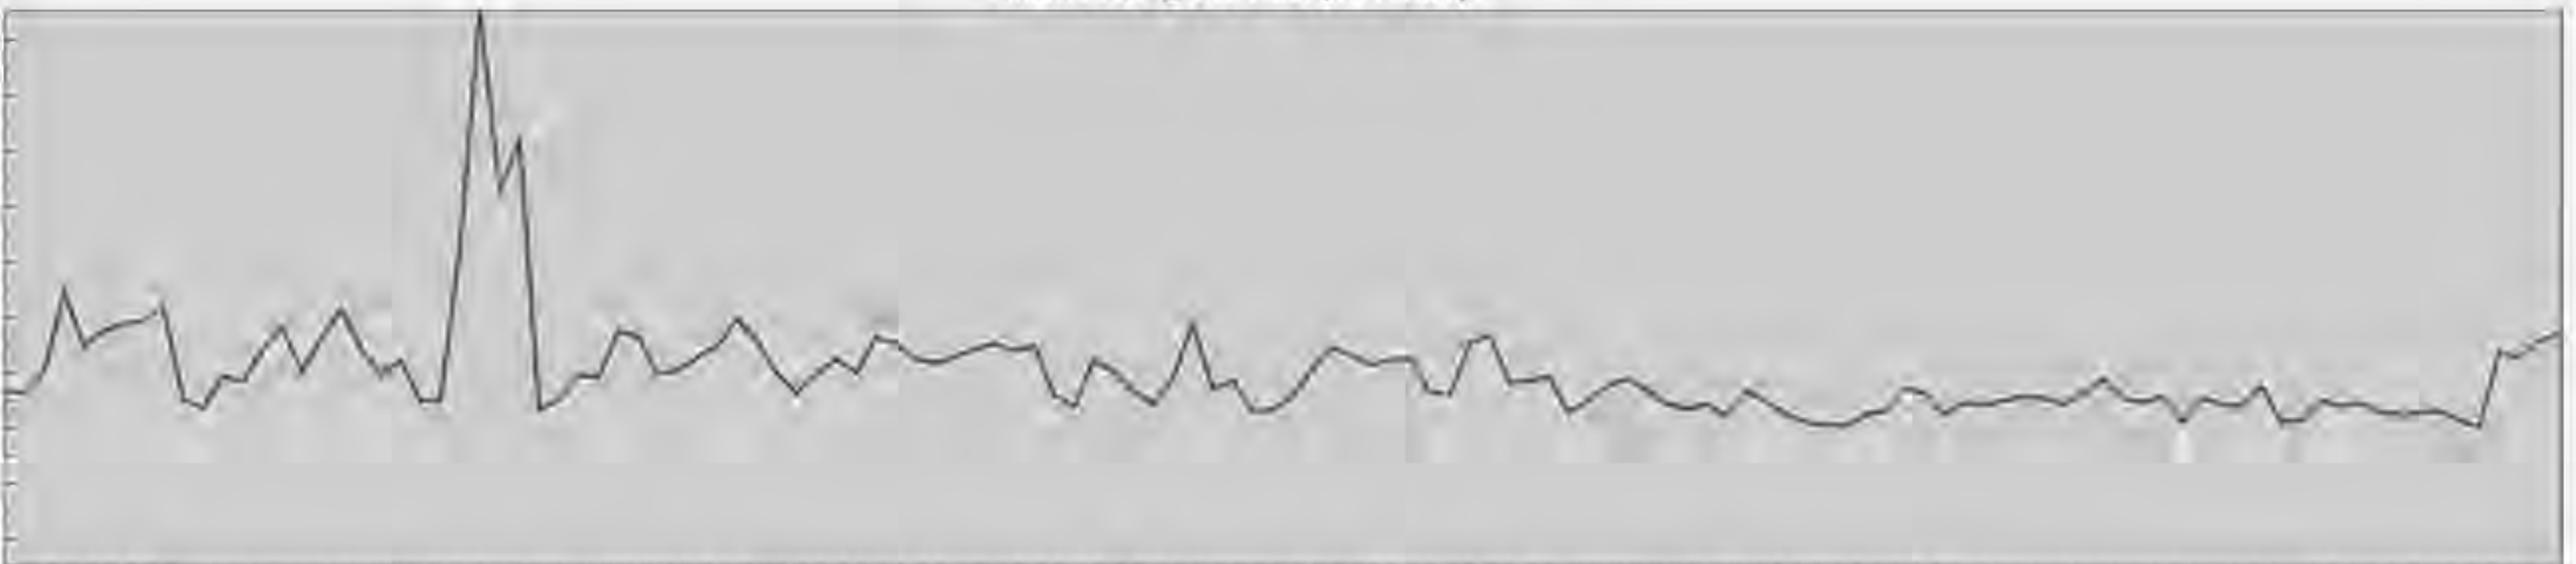

01-PP-M-cells\_GSM190789.CEL  
 02-PP-M-cells\_GSM190790.CEL  
 03-PP-M-cells\_GSM190791.CEL  
 04-CT-V-M-cells\_GSM190792.CEL  
 05-CT-V-M-cells\_GSM190793.CEL  
 06-CT-V-M-cells\_GSM190794.CEL  
 07-Ileum-IEC\_GSM190795.CEL  
 08-Ileum-IEC\_GSM190796.CEL  
 09-Ileum-IEC\_GSM190797.CEL  
 10-FAE-RMPYEP001001.CEL  
 11-FAE-RMPYEP002001.CEL  
 12-Small-intestine-epithelium\_RMINEP001001.CEL  
 13-Small-intestine-epithelium\_RMINEP002001.CEL  
 14-Ileum-IEC\_GSM350371.CEL  
 15-Ileum-IEC\_GSM350375.CEL  
 16-Colon-IEC-Gf\_GSM350375.CEL  
 17-Colon-IEC-Gf\_GSM349880.CEL  
 18-Colon-Vill-GSM480362.CEL  
 19-Colon-Vill-GSM480363.CEL  
 20-Colon-Crypt-GSM480374.CEL  
 21-Colon-Crypt-GSM480375.CEL  
 22-Paneth-cells\_GSM318589.CEL  
 23-Paneth-cells\_GSM318590.CEL  
 24-Paneth-cells\_GSM116350.CEL  
 25-Paneth-cells\_GSM116350.CEL  
 26-Paneth-cells-Gf-1-GSM116357.CEL  
 27-Paneth-cells-Gf-1-GSM116357.CEL  
 28-Bone marrow\_GSM258627.CEL  
 29-Bone marrow\_GSM258627.CEL  
 30-HSC\_GSM258770.CEL  
 31-HSC\_GSM258770.CEL  
 32-MEP-GSM258771.CEL  
 33-MEP-GSM258771.CEL  
 34-MEP-GSM258864.CEL  
 35-MEP-GSM258864.CEL  
 36-GMP-GSM258866.CEL  
 37-GMP-GSM258866.CEL  
 38-GMP-GSM258866.CEL  
 39-Granulocytes\_GSM258667.CEL  
 40-Mast-cells\_GSM258712.CEL  
 41-Mast-cells\_GSM258712.CEL  
 42-Mast-cells-IdU-GSM258713.CEL  
 43-Mast-cells-IdU-GSM258713.CEL  
 44-Mast-cells-IdU+Ad-GSM258719.CEL  
 45-Mast-cells-IdU+Ad-GSM258719.CEL  
 46-NK-cells\_GSM258732.CEL  
 47-NK-cells\_GSM258732.CEL  
 48-CD8a+DC\_GSM258646.CEL  
 49-CD8a+DC\_GSM258646.CEL  
 50-CD8a-DC\_GSM258647.CEL  
 51-CD8a-DC\_GSM258647.CEL  
 52-Plasmacytoid-DC\_GSM258650.CEL  
 53-Plasmacytoid-DC\_GSM258650.CEL  
 54-BMM-GSM258694.CEL  
 55-BMM-GSM258694.CEL  
 56-BMM-LPS-6h-GSM258700.CEL  
 57-BMM-LPS-6h-GSM258700.CEL  
 58-BMM-LPS-7h-GSM258702.CEL  
 59-BMM-LPS-7h-GSM258702.CEL  
 60-PP-7h-GSM258706.CEL  
 61-PP-7h-GSM258706.CEL  
 62-Microglia\_GSM258721.CEL  
 63-Microglia\_GSM258721.CEL  
 64-Osteoclasts\_GSM258743.CEL  
 65-Osteoclasts\_GSM258743.CEL  
 66-Thymocyte-DN\_GSM465595.CEL  
 67-T-cells-CD4+GSM258773.CEL  
 68-T-cells-CD4+GSM258773.CEL  
 69-T-cells-CD8+GSM258776.CEL  
 70-T-cells-CD8+GSM258776.CEL  
 71-Tregs\_GSM258778.CEL  
 72-Tregs\_GSM258778.CEL  
 73-BAF3\_GSM258819.CEL  
 74-BAF3\_GSM258820.CEL  
 75-MZ-Bcell\_GSM258822.CEL  
 76-MZ-Bcell\_GSM258822.CEL  
 77-Follicular-Bcells\_GSM258864.CEL  
 78-Follicular-Bcells\_GSM258864.CEL  
 79-E-L-Y-RMLNDC002001.CEL  
 80-E-L-Y-RMLNDC003001.CEL  
 81-PP-FDC\_GSM481976.CEL  
 82-PP-FDC\_GSM481976.CEL  
 83-PP-FDC\_GSM481977.CEL  
 84-Lymph-endo-cells\_GSM143704.CEL  
 85-MS-1\_GSM234692.CEL  
 86-LT-cell\_GSM465596.CEL  
 87-Nat Helper cell\_GSM465593.CEL  
 88-Nat Helper cell\_GSM465594.CEL  
 89-Chondrocytes\_GSM266741.CEL  
 90-Chondrocytes\_GSM266741.CEL  
 91-Osteoblast-d5\_GSM258742.CEL  
 92-Osteoblast-d5\_GSM258742.CEL  
 93-Osteoblast-d14\_GSM258737.CEL  
 94-Osteoblast-d14\_GSM258738.CEL  
 95-Osteoblast-d21\_GSM258740.CEL  
 96-Osteoblast-d21\_GSM258740.CEL  
 97-10T12\_GSM258632.CEL  
 98-10T12\_GSM258632.CEL  
 99-3T3-L1\_GSM258610.CEL  
 100-3T3-L1\_GSM258610.CEL  
 101-NH3T3\_GSM258739.CEL  
 102-NH3T3\_GSM258739.CEL  
 103-C2C12\_GSM258829.CEL  
 104-C2C12\_GSM258829.CEL  
 105-Bruce4\_GSM258869.CEL  
 106-Bruce4\_GSM258869.CEL  
 107-MIMCD3\_GSM258723.CEL  
 108-MIMCD3\_GSM258723.CEL  
 109-mim6\_GSM258725.CEL  
 110-mim6\_GSM258725.CEL  
 111-Astrocytes\_GSM241898.CEL  
 112-Astrocytes\_GSM241898.CEL  
 113-Spleen\_GSM258767.CEL  
 114-Spleen\_GSM258767.CEL  
 115-Spleen\_GSM258768.CEL  
 116-Lymph-nodes\_GSM258691.CEL  
 117-Lymph-nodes\_GSM258691.CEL  
 118-Intestine-small\_GSM258677.CEL  
 119-Intestine-small\_GSM258677.CEL  
 120-Intestine-large\_GSM258679.CEL  
 121-Intestine-large\_GSM258679.CEL  
 122-Intestine-large\_GSM258676.CEL  
 123-Intestine-large\_GSM258676.CEL  
 124-Colon-d4-GSM198810.CEL  
 125-Colon-d4-GSM198810.CEL  
 126-Colon-d9-GSM198810.CEL  
 127-Colon-d9-GSM198810.CEL  
 128-NALT\_GSM289410.CEL  
 129-NALT\_GSM289410.CEL  
 130-NALT\_GSM289411.CEL



Cluster0130\_Uncertain (14 nodes)

443.1  
419.8  
396.4  
373.1  
349.8  
326.5  
303.2  
279.8  
256.5  
233.2  
209.9  
186.6  
163.2  
139.9  
116.6  
93.3  
70  
46.6  
23.3  
0

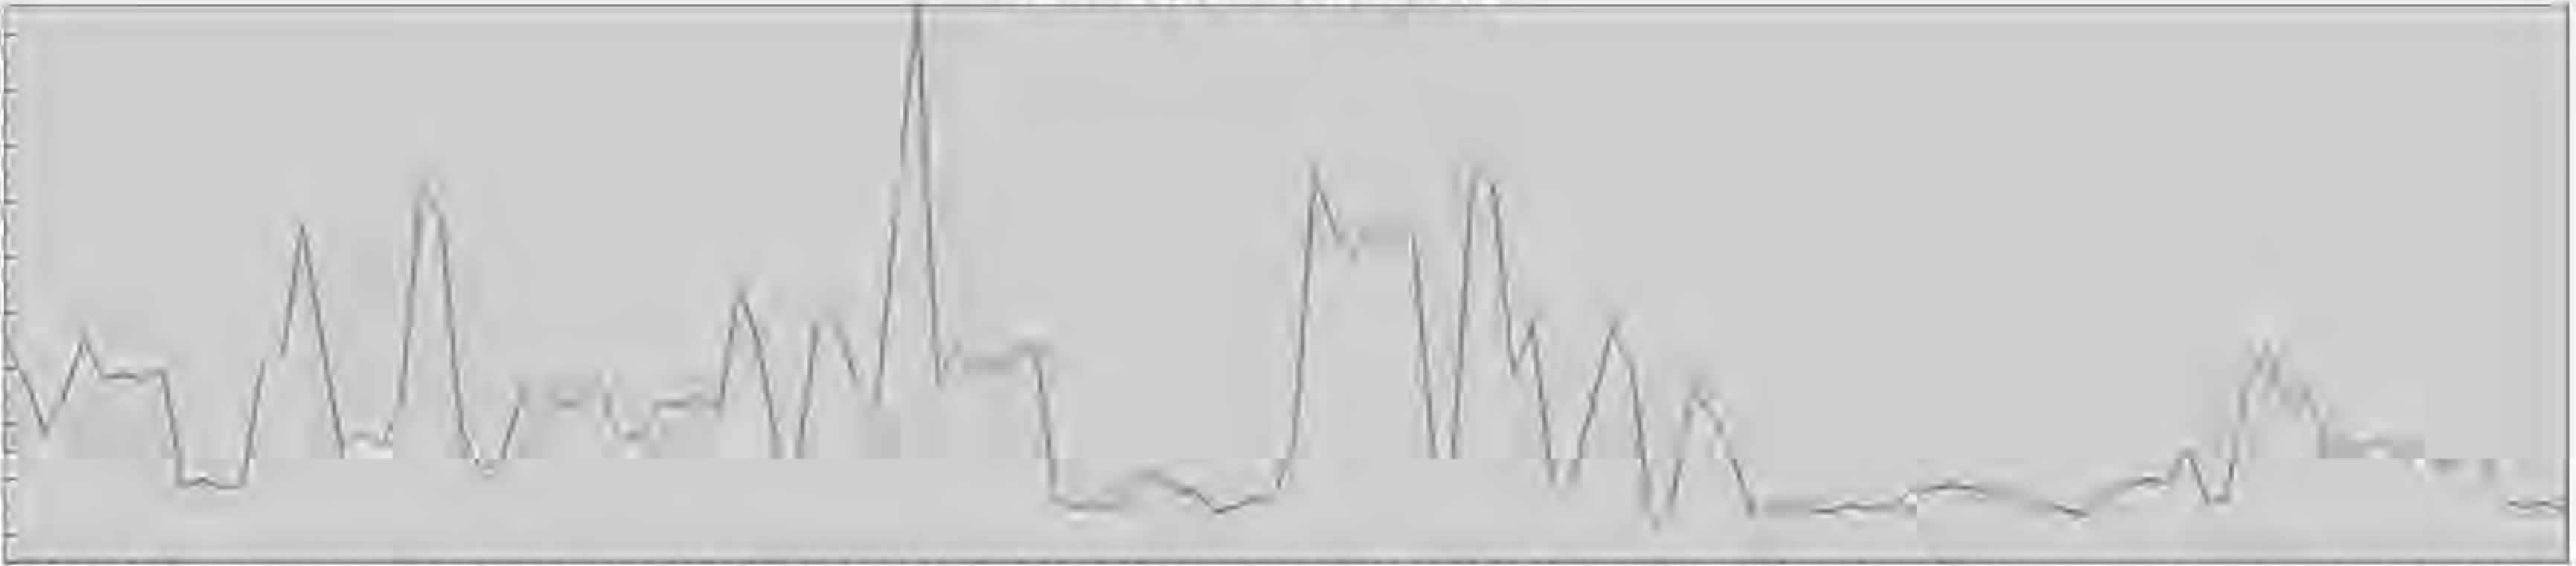

01-PP-M-cells\_GSM190789.CEL  
 02-PP-M-cells\_GSM190790.CEL  
 03-PP-M-cells\_GSM190791.CEL  
 04-CT-v-M-cells\_GSM190792.CEL  
 05-CT-v-M-cells\_GSM190793.CEL  
 06-CT-v-M-cells\_GSM190794.CEL  
 07-Ileum-IEC\_GSM190795.CEL  
 08-Ileum-IEC\_GSM190796.CEL  
 09-Ileum-IEC\_GSM190797.CEL  
 10-FAE-RMPYEP001001.CEL  
 11-FAE-RMPYEP002001.CEL  
 12-Small-intestine-epithelium\_RMINEP001001.CEL  
 13-Small-intestine-epithelium\_RMINEP002001.CEL  
 14-Ileum-IEC\_GSM350371.CEL  
 15-Ileum-IEC\_GSM350375.CEL  
 16-Colon-VIII\_GSM480362.CEL  
 17-Colon-VIII\_GSM480363.CEL  
 18-Colon-VIII\_GSM480364.CEL  
 19-Colon-Crypt\_GSM480374.CEL  
 20-Colon-Crypt\_GSM480375.CEL  
 21-Colon-Crypt\_GSM480376.CEL  
 22-Paneth-cells\_GSM318589.CEL  
 23-Paneth-cells\_GSM318590.CEL  
 24-Paneth-cells\_GSM116359.CEL  
 25-Paneth-cells\_GSM116360.CEL  
 26-Paneth-cells-GF-1\_GSM116357.CEL  
 27-Paneth-cells-GF-1\_GSM116358.CEL  
 28-Bone marrow\_GSM258627.CEL  
 29-Bone marrow\_GSM258628.CEL  
 30-HSC\_GSM258770.CEL  
 31-HSC\_GSM258771.CEL  
 32-MEP\_GSM258772.CEL  
 33-MEP\_GSM258773.CEL  
 34-MEP\_GSM258774.CEL  
 35-GMP\_GSM258864.CEL  
 36-GMP\_GSM258865.CEL  
 37-GMP\_GSM258866.CEL  
 38-GMP\_GSM258867.CEL  
 39-Granulocytes\_GSM258668.CEL  
 40-Mast-cells\_GSM258712.CEL  
 41-Mast-cells\_GSM258713.CEL  
 42-Mast-cells-IgE\_GSM258714.CEL  
 43-Mast-cells-IgE+Ad\_GSM258718.CEL  
 44-Mast-cells-IgE+Ad\_GSM258717.CEL  
 45-Mast-cells-IgE+Ad\_GSM258719.CEL  
 46-NK-cells\_GSM258732.CEL  
 47-NK-cells\_GSM258731.CEL  
 48-CD8a+DC\_GSM258646.CEL  
 49-CD8a+DC\_GSM258645.CEL  
 50-CD8a-DC\_GSM258647.CEL  
 51-CD8a-DC\_GSM258648.CEL  
 52-Plasmacytoid-DC\_GSM258649.CEL  
 53-Plasmacytoid-DC\_GSM258650.CEL  
 54-BMM-GSM258694.CEL  
 55-BMM-GSM258695.CEL  
 56-BMM-LPS-6h\_GSM258699.CEL  
 57-BMM-LPS-6h\_GSM258700.CEL  
 58-BMM-LPS-7h\_GSM258702.CEL  
 59-BMM-LPS-7h\_GSM258701.CEL  
 60-BMM-LPS-7h\_GSM258706.CEL  
 61-BMM-LPS-7h\_GSM258705.CEL  
 62-Microglia\_GSM258721.CEL  
 63-Microglia\_GSM258722.CEL  
 64-Osteoclasts\_GSM258743.CEL  
 65-Osteoclasts\_GSM258744.CEL  
 66-Thymocyte-DN\_GSM465595.CEL  
 67-T-cells-CD4+GSM258773.CEL  
 68-T-cells-CD4+GSM258774.CEL  
 69-T-cells-CD8+GSM258775.CEL  
 70-T-cells-CD8+GSM258776.CEL  
 71-Tregs\_GSM258778.CEL  
 72-Tregs\_GSM258777.CEL  
 73-BAF3\_GSM258819.CEL  
 74-BAF3\_GSM258820.CEL  
 75-MZ-Bcell\_GSM258821.CEL  
 76-MZ-Bcell\_GSM258822.CEL  
 77-Follicular-Bcells\_GSM258664.CEL  
 78-Follicular-Bcells\_GSM258665.CEL  
 79-E-L-Y-RMLNDC002001.CEL  
 80-E-L-Y-RMLNDC003001.CEL  
 81-PP-FDC\_GSM481976.CEL  
 82-PP-FDC\_GSM481978.CEL  
 83-PP-FDC\_GSM481977.CEL  
 84-Lymph-endo-cells\_GSM143704.CEL  
 85-MS-1\_GSM234692.CEL  
 86-LT-cell\_GSM465596.CEL  
 87-Nat Helper cell\_GSM465593.CEL  
 88-Nat Helper cell\_GSM465594.CEL  
 89-Chondrocytes\_GSM266741.CEL  
 90-Chondrocytes\_GSM266740.CEL  
 91-Osteoblast-d5\_GSM258741.CEL  
 92-Osteoblast-d5\_GSM258742.CEL  
 93-Osteoblast-d14\_GSM258737.CEL  
 94-Osteoblast-d21\_GSM258738.CEL  
 95-Osteoblast-d21\_GSM258739.CEL  
 96-Osteoblast-d21\_GSM258740.CEL  
 97-10T12\_GSM258632.CEL  
 98-10T12\_GSM258631.CEL  
 99-3T3-L1\_GSM258609.CEL  
 100-3T3-L1\_GSM258610.CEL  
 101-NH3T3\_GSM258739.CEL  
 102-NH3T3\_GSM258730.CEL  
 103-C2C12\_GSM258829.CEL  
 104-C2C12\_GSM258830.CEL  
 105-Bruce4\_GSM258866.CEL  
 106-Bruce4\_GSM258865.CEL  
 107-MIMCD3\_GSM258723.CEL  
 108-MIMCD3\_GSM258724.CEL  
 109-mim6\_GSM258725.CEL  
 110-mim6\_GSM258726.CEL  
 111-Astrocytes\_GSM241898.CEL  
 112-Astrocytes\_GSM241899.CEL  
 113-Spleen\_GSM258767.CEL  
 114-Spleen\_GSM258768.CEL  
 115-Spleen\_GSM258769.CEL  
 116-Lymph-nodes\_GSM258691.CEL  
 117-Lymph-nodes\_GSM258692.CEL  
 118-Intestine-small\_GSM258677.CEL  
 119-Intestine-small\_GSM258678.CEL  
 120-Intestine-large\_GSM258675.CEL  
 121-Intestine-large\_GSM258676.CEL  
 122-Colon-d4\_GSM198101.CEL  
 123-Colon-d4\_GSM198102.CEL  
 124-Colon-d9\_GSM198103.CEL  
 125-Colon-d9\_GSM198104.CEL  
 126-Colon-d9\_GSM198105.CEL  
 127-NALT\_GSM289408.CEL  
 128-NALT\_GSM289409.CEL  
 129-NALT\_GSM289410.CEL  
 130-NALT\_GSM289411.CEL



Cluster0131\_House keeping-transcription (14 nodes)

857.8  
812.7  
767.5  
722.4  
677.2  
632.1  
586.9  
541.8  
496.6  
451.5  
406.3  
361.2  
316  
270.9  
225.7  
180.6  
135.4  
90.3  
45.1  
0

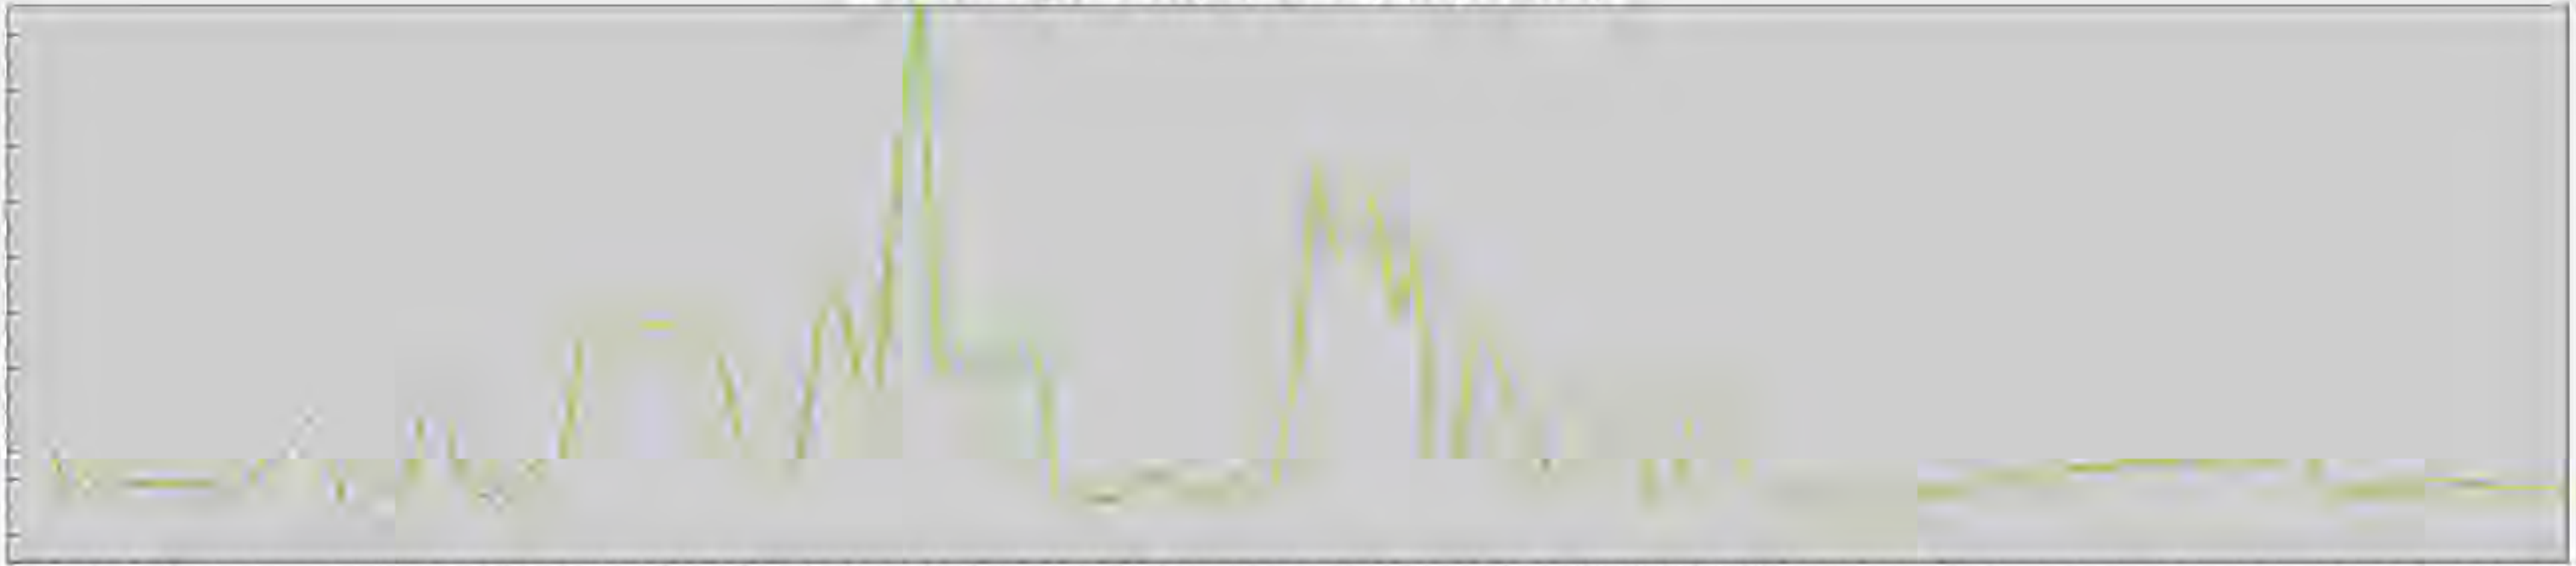

130- NALT GSM289411 CEL  
 129- NALT GSM289410 CEL  
 128- NALT GSM289409 CEL  
 127- NALT GSM289408 CEL  
 126- Colon-d9 GSM1988105 CEL  
 125- Colon-d9 GSM1988104 CEL  
 124- Colon-d9 GSM1988103 CEL  
 123- Colon-d4 GSM1988102 CEL  
 122- Colon-d4 GSM1988101 CEL  
 121- Intestine-large GSM258676 CEL  
 120- Intestine-large GSM258675 CEL  
 119- Intestine-small GSM258678 CEL  
 118- Intestine-small GSM258677 CEL  
 117- Lymph-nodes GSM258691 CEL  
 116- Lymph-nodes GSM258726 CEL  
 115- Spleen GSM258767 CEL  
 114- Spleen GSM258767 CEL  
 113- Neuro2a GSM258727 CEL  
 112- Neuro2a GSM241898 CEL  
 111- Astrocytes GSM241898 CEL  
 110- mimb GSM258726 CEL  
 109- mimb GSM258725 CEL  
 108- MIMCD3 GSM258724 CEL  
 107- MIMCD3 GSM258723 CEL  
 106- Bruce4 GSM258656 CEL  
 105- Bruce4 GSM258656 CEL  
 104- C2C12 GSM258690 CEL  
 103- C2C12 GSM258629 CEL  
 102- NIH3T3 GSM258730 CEL  
 101- NIH3T3 GSM258729 CEL  
 100- 3T3-L1 GSM258610 CEL  
 99- 3T3-L1 GSM258609 CEL  
 98- 10T12 GSM258632 CEL  
 97- 10T12 GSM258631 CEL  
 96- Osteoblast-d21 GSM258740 CEL  
 95- Osteoblast-d21 GSM258739 CEL  
 94- Osteoblast-d14 GSM258738 CEL  
 93- Osteoblast-d14 GSM258737 CEL  
 92- Osteoblast-d5 GSM258742 CEL  
 91- Osteoblast-d5 GSM258741 CEL  
 90- Chondrocytes GSM266741 CEL  
 89- Nat Helper cell GSM465594 CEL  
 88- Nat Helper cell GSM465593 CEL  
 87- T cell GSM465596 CEL  
 86- T cell GSM465596 CEL  
 85- MS-1 GSM234692 CEL  
 84- Lymph-endo-cells GSM143704 CEL  
 83- PP-FDC GSM481977 CEL  
 82- PP-FDC GSM481978 CEL  
 81- PP-FDC GSM481976 CEL  
 80- FLY RMLNDCC003001 CEL  
 79- FLY RMLNDCC003001 CEL  
 78- Follicular-Bcells GSM258664 CEL  
 77- Follicular-Bcells GSM258664 CEL  
 76- MZ-Bcell GSM258627 CEL  
 75- MZ-Bcell GSM258627 CEL  
 74- BAF3 GSM258620 CEL  
 73- BAF3 GSM258619 CEL  
 72- Tregs GSM258778 CEL  
 71- Tregs GSM258777 CEL  
 70- T-cells-CD8+ GSM258776 CEL  
 69- T-cells-CD8+ GSM258774 CEL  
 68- T-cells-CD4+ GSM258773 CEL  
 67- T-cells-CD4+ GSM258743 CEL  
 66- Thymocyte-DN GSM465595 CEL  
 65- Osteoclasts GSM258743 CEL  
 64- Microglia GSM258721 CEL  
 63- Microglia GSM258721 CEL  
 62- MM-PS-7h GSM258706 CEL  
 61- MM-PS-7h GSM258706 CEL  
 60- MM-PS-6h GSM258702 CEL  
 59- MM-PS-6h GSM258702 CEL  
 58- MM-PS-6h GSM258699 CEL  
 57- MM-PS-6h GSM258699 CEL  
 56- MM-PS-6h GSM258694 CEL  
 55- MM-PS-6h GSM258694 CEL  
 54- Plasmacytoid-DC GSM258650 CEL  
 53- Plasmacytoid-DC GSM258649 CEL  
 52- CD8a-DC GSM258647 CEL  
 51- CD8a-DC GSM258647 CEL  
 50- CD8a+DC GSM258646 CEL  
 49- CD8a+DC GSM258646 CEL  
 48- NK-cells GSM258732 CEL  
 47- NK-cells GSM258732 CEL  
 46- Mast-cells-IgE+Ad GSM258718 CEL  
 45- Mast-cells-IgE+Ad GSM258717 CEL  
 44- Mast-cells-IgE GSM258714 CEL  
 43- Mast-cells-IgE GSM258713 CEL  
 42- Mast-cells-IgE GSM258712 CEL  
 41- Mast-cells GSM258711 CEL  
 40- Granulocytes GSM258668 CEL  
 39- Granulocytes GSM258667 CEL  
 38- GMP GSM258666 CEL  
 37- GMP GSM258666 CEL  
 36- GMP GSM258665 CEL  
 35- GMP GSM258642 CEL  
 34- MEMP GSM258641 CEL  
 33- MEMP GSM258720 CEL  
 32- MEMP GSM258719 CEL  
 31- HSC GSM258770 CEL  
 30- HSC GSM258769 CEL  
 29- Bone marrow GSM258628 CEL  
 28- Bone marrow GSM258627 CEL  
 27- Paneth-cells-GF-1 GSM116357 CEL  
 26- Paneth-cells-GF-1 GSM116350 CEL  
 25- Paneth-cells GSM116359 CEL  
 24- Paneth-cells GSM318589 CEL  
 23- Paneth-cells GSM318590 CEL  
 22- Paneth-cells GSM480375 cel  
 21- Colon-Crypt GSM480374 cel  
 20- Colon-Crypt GSM480363 cel  
 19- Colon-Vill GSM480363 cel  
 18- Colon-Vill GSM480362 cel  
 17- Colon-IEC-GF GSM349880 CEL  
 16- Colon-IEC-GF GSM350375 CEL  
 15- Ileum-IEC-GF GSM350376 CEL  
 14- Ileum-IEC GSM350371 CEL  
 13- Small-intestine-epithelium RMINEP002001 CEL  
 12- Small-intestine-epithelium RMINEP001001 CEL  
 11- FAE RMPYEP002001 CEL  
 10- FAE RMPYEP001001 CEL  
 09- Ileum-IEC GSM190797 CEL  
 08- Ileum-IEC GSM190796 CEL  
 07- Ileum-IEC GSM190795 CEL  
 06- CT-v-M-cells GSM190794 CEL  
 05- CT-v-M-cells GSM190793 CEL  
 04- CT-v-M-cells GSM190792 CEL  
 03- PP-M-cells GSM190791 CEL  
 02- PP-M-cells GSM190790 CEL  
 01- PP-M-cells GSM190789 CEL



Cluster0132\_Phagocyte-related (14 nodes)

3,853.8  
3,651  
3,448.2  
3,245.3  
3,042.6  
2,839.7  
2,636.8  
2,434  
2,231.2  
2,028.3  
1,825.5  
1,622.7  
1,419.8  
1,217  
1,014.2  
811.3  
608.5  
405.7  
202.8  
0

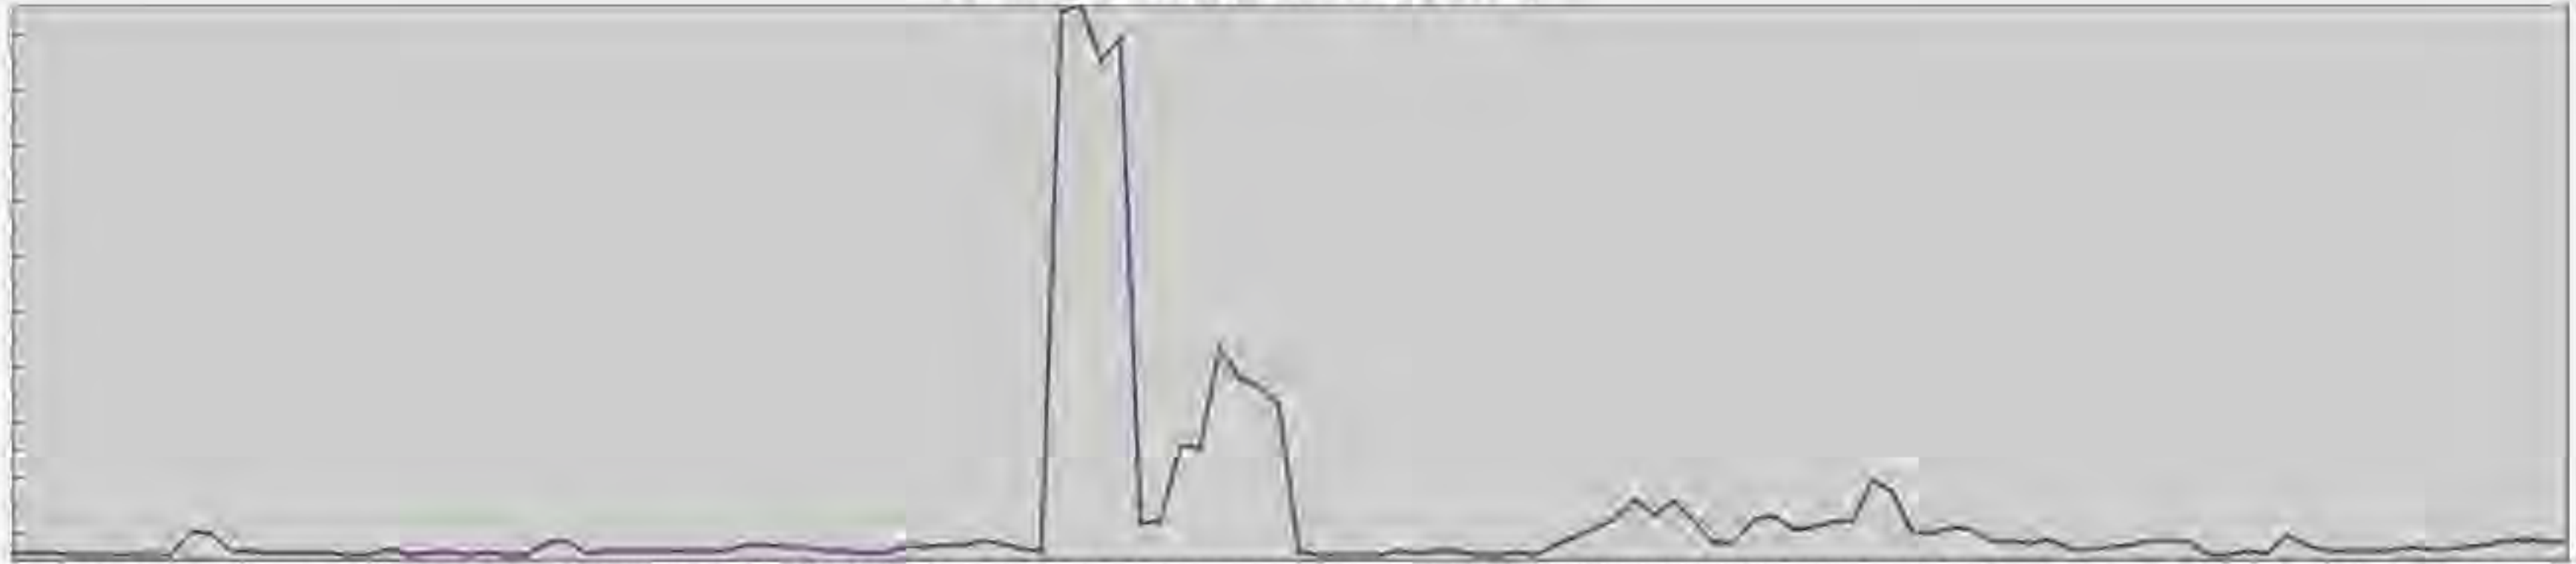

130-NALT GSM289411 CEL  
129-NALT GSM289410 CEL  
128-NALT GSM289409 CEL  
127-NALT GSM289408 CEL  
126-Color-d9 GSM1988105 CEL  
125-Color-d9 GSM1988104 CEL  
124-Color-d9 GSM1988103 CEL  
123-Color-d4 GSM1988102 CEL  
122-Color-d4 GSM1988101 CEL  
121-Intestine-large GSM258676 CEL  
120-Intestine-large GSM258675 CEL  
119-Intestine-small GSM258674 CEL  
118-Intestine-small GSM258673 CEL  
117-Lymph-nodes GSM258672 CEL  
116-Lymph-nodes GSM258671 CEL  
115-Spleen GSM258767 CEL  
114-Spleen GSM258766 CEL  
113-Neuro2a GSM258728 CEL  
112-Neuro2a GSM258727 CEL  
111-Astrocytes GSM241898 CEL  
110-mimb GSM258726 CEL  
109-mimb GSM258725 CEL  
108-MIMCD3 GSM258724 CEL  
107-MIMCD3 GSM258723 CEL  
106-Bruce4 GSM258656 CEL  
105-Bruce4 GSM258655 CEL  
104-C2C12 GSM258690 CEL  
103-C2C12 GSM258689 CEL  
102-NH3T3 GSM258739 CEL  
101-NH3T3 GSM258738 CEL  
100-3T3-L1 GSM258610 CEL  
99-3T3-L1 GSM258609 CEL  
98-10T12 GSM258632 CEL  
97-10T12 GSM258631 CEL  
96-Osteoblast-d21 GSM258740 CEL  
95-Osteoblast-d21 GSM258739 CEL  
94-Osteoblast-d14 GSM258738 CEL  
93-Osteoblast-d14 GSM258737 CEL  
92-Osteoblast-d5 GSM258742 CEL  
91-Osteoblast-d5 GSM258741 CEL  
90-Chondrocytes GSM266741 CEL  
89-Chondrocytes GSM266740 CEL  
88-Nat Helper cell GSM465594 CEL  
87-Nat Helper cell GSM465593 CEL  
86-LT cell GSM465596 CEL  
85-MS-1 GSM234692 CEL  
84-Lymph-endo-cells GSM143704 CEL  
83-P-FDC GSM481977 CEL  
82-P-FDC GSM481978 CEL  
81-P-FDC GSM481976 CEL  
80-L-Y RMLNDCC003001 CEL  
79-L-Y RMLNDCC003001 CEL  
78-Follicular-Bcells GSM258664 CEL  
77-Follicular-Bcells GSM258663 CEL  
76-MZ-Bcell GSM258622 CEL  
75-MZ-Bcell GSM258621 CEL  
74-BAF3 GSM258620 CEL  
73-BAF3 GSM258619 CEL  
72-Tregs GSM258778 CEL  
71-Tregs GSM258777 CEL  
70-T-cells-CD8+ GSM258776 CEL  
69-T-cells-CD8+ GSM258774 CEL  
68-T-cells-CD4+ GSM258773 CEL  
67-T-cells-CD4+ GSM258772 CEL  
66-Thymocyte-DN GSM465595 CEL  
65-Osteoclasts GSM258743 CEL  
64-Osteoclasts GSM258744 CEL  
63-Microglia GSM258721 CEL  
62-Microglia GSM258721 CEL  
61-MM-LPS-7h GSM258706 CEL  
60-MM-LPS-7h GSM258706 CEL  
59-MM-LPS-6h GSM258702 CEL  
58-MM-LPS-6h GSM258701 CEL  
57-MM-LPS-6h GSM258699 CEL  
56-MM-LPS-6h GSM258699 CEL  
55-MM-LPS-6h GSM258699 CEL  
54-MM-LPS-6h GSM258699 CEL  
53-Plasmacytoid-DC GSM258650 CEL  
52-Plasmacytoid-DC GSM258649 CEL  
51-CD8a-DC GSM258647 CEL  
50-CD8a-DC GSM258647 CEL  
49-CD8a+DC GSM258646 CEL  
48-CD8a+DC GSM258646 CEL  
47-NK-cells GSM258732 CEL  
46-NK-cells GSM258731 CEL  
45-Mast-cells-IgE+Ad GSM258719 CEL  
44-Mast-cells-IgE+Ad GSM258717 CEL  
43-Mast-cells-IgE GSM258714 CEL  
42-Mast-cells-IgE GSM258713 CEL  
41-Mast-cells GSM258712 CEL  
40-Granulocytes GSM258667 CEL  
39-Granulocytes GSM258667 CEL  
38-GMP GSM258666 CEL  
37-GMP GSM258666 CEL  
36-GMP GSM258665 CEL  
35-GMP GSM258664 CEL  
34-MPEP GSM2588720 CEL  
33-MPEP GSM2588719 CEL  
32-MPEP GSM2588719 CEL  
31-HESC GSM258770 CEL  
30-HESC GSM258769 CEL  
29-Bone marrow GSM258628 CEL  
28-Bone marrow GSM258627 CEL  
27-paneth-cells-GE GSM116358 CEL  
26-paneth-cells-GE GSM116357 CEL  
25-paneth-cells GSM116350 CEL  
24-paneth-cells GSM116359 CEL  
23-paneth-cells GSM318589 CEL  
22-paneth-cells GSM318590 CEL  
21-Color-Crypt GSM480375 cel  
20-Color-Crypt GSM480374 cel  
19-Color-Vill GSM480363 cel  
18-Color-Vill GSM480362 cel  
17-Color-IEC-GE GSM349880 CEL  
16-Color-IEC-GE GSM350375 CEL  
15-Ileum-IEC GSM350376 CEL  
14-Ileum-IEC GSM350371 CEL  
13-Small-intestine-epithelium RMINEP002001 CEL  
12-Small-intestine-epithelium RMINEP001001 CEL  
11-FAE RMPYEP002001 CEL  
10-FAE RMPYEP001001 CEL  
09-Ileum-IEC GSM190797 CEL  
08-Ileum-IEC GSM190796 CEL  
07-Ileum-IEC GSM190795 CEL  
06-CT-v-M-cells GSM190794 CEL  
05-CT-v-M-cells GSM190793 CEL  
04-PP-M-cells GSM190792 CEL  
03-PP-M-cells GSM190791 CEL  
02-PP-M-cells GSM190790 CEL  
01-PP-M-cells GSM190789 CEL



Cluster0133\_House keeping-transcription (14 nodes)

1,619.3  
1,534  
1,448.8  
1,363.6  
1,278.4  
1,193.1  
1,107.9  
1,022.7  
937.5  
852.2  
767  
681.8  
596.6  
511.3  
426.1  
340.9  
255.7  
170.4  
85.2  
0

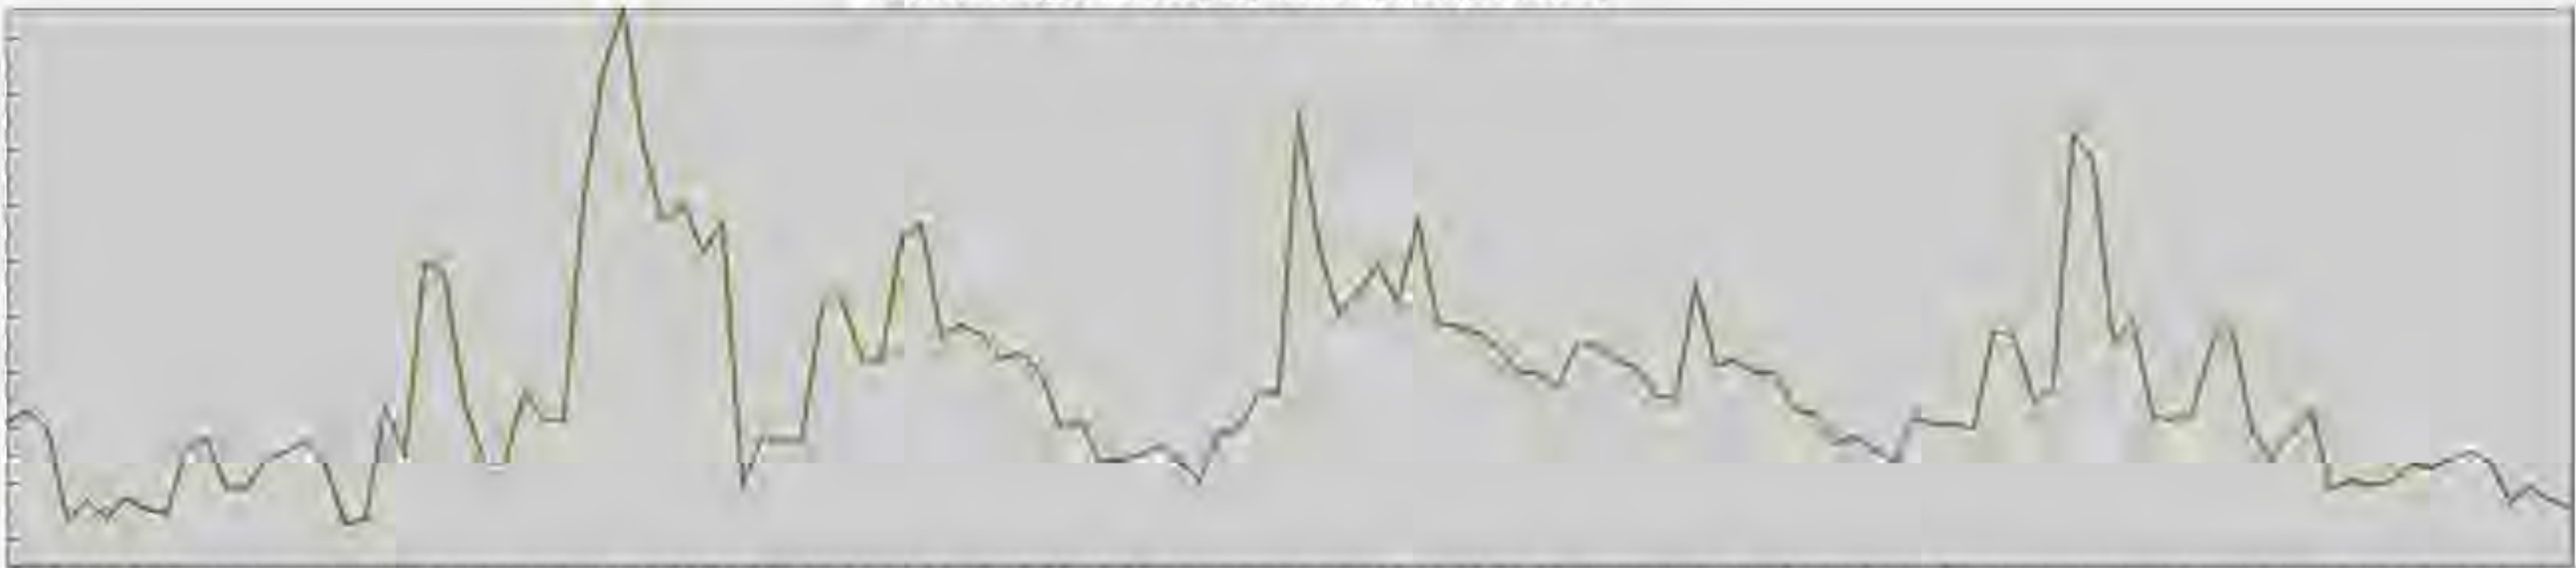

130-NALT GSM289411.CEL  
129-NALT GSM289410.CEL  
128-NALT GSM289409.CEL  
127-NALT GSM289408.CEL  
126-Column-d9 GSM1988105.CEL  
125-Column-d9 GSM1988103.CEL  
124-Column-d9 GSM1988102.CEL  
123-Column-d4 GSM1988101.CEL  
122-Column-d4 GSM1988101.CEL  
121-Intestine-large GSM258676.CEL  
120-Intestine-large GSM258675.CEL  
119-Intestine-small GSM258678.CEL  
118-Intestine-small GSM258692.CEL  
117-Lymph-nodes GSM258691.CEL  
116-Lymph-nodes GSM258726.CEL  
115-Spleen GSM258768.CEL  
114-Spleen GSM258767.CEL  
113-Neuro2a GSM258728.CEL  
112-Neuro2a GSM258727.CEL  
111-Astrocytes GSM241898.CEL  
110-mim6 GSM258725.CEL  
109-mim6 GSM258725.CEL  
108-MIMCD3 GSM258724.CEL  
107-MIMCD3 GSM258723.CEL  
106-Bruce4 GSM258656.CEL  
105-Bruce4 GSM258656.CEL  
104-C2C12 GSM258690.CEL  
103-C2C12 GSM258629.CEL  
102-NH3T3 GSM258739.CEL  
101-NH3T3 GSM258739.CEL  
100-3T3-L1 GSM258610.CEL  
99-3T3-L1 GSM258609.CEL  
98-10T12 GSM258632.CEL  
97-10T12 GSM258631.CEL  
96-Osteoblast-d21 GSM258740.CEL  
95-Osteoblast-d21 GSM258739.CEL  
94-Osteoblast-d14 GSM258738.CEL  
93-Osteoblast-d14 GSM258737.CEL  
92-Osteoblast-d5 GSM258742.CEL  
91-Osteoblast-d5 GSM258741.CEL  
90-Chondrocytes GSM266741.CEL  
89-Chondrocytes GSM266740.CEL  
88-Nat Helper cell GSM465594.CEL  
87-Nat Helper cell GSM465593.CEL  
86-LT cell GSM465596.CEL  
85-MS-1 GSM234692.CEL  
84-Lymph-endg-cells GSM143704.CEL  
83-PP-FDC GSM481977.CEL  
82-PP-FDC GSM481978.CEL  
81-PP-FDC GSM481976.CEL  
80-LY-RMLND002001.CEL  
79-LY-RMLND002001.CEL  
78-Follicular-Bcells GSM258664.CEL  
77-Follicular-Bcells GSM258663.CEL  
76-MZ-Bcell GSM258622.CEL  
75-MZ-Bcell GSM258621.CEL  
74-BAF3 GSM258620.CEL  
73-BAF3 GSM258619.CEL  
72-Tregs GSM258778.CEL  
71-Tregs GSM258777.CEL  
70-T-cells-CD8+ GSM258776.CEL  
69-T-cells-CD8+ GSM258774.CEL  
68-T-cells-CD4+ GSM258773.CEL  
67-T-cells-CD4+ GSM258773.CEL  
66-Thymocyte-DN GSM465595.CEL  
65-Osteoclasts GSM258743.CEL  
64-Microglia GSM258721.CEL  
63-Microglia GSM258721.CEL  
62-MM-LPS-7h GSM258706.CEL  
61-MM-LPS-7h GSM258706.CEL  
60-MM-LPS-7h GSM258705.CEL  
59-MM-LPS-6h GSM258702.CEL  
58-MM-LPS-6h GSM258702.CEL  
57-MM-LPS-6h GSM258699.CEL  
56-MM-LPS-6h GSM258699.CEL  
55-MM-LPS-6h GSM258699.CEL  
54-MM-LPS-6h GSM258699.CEL  
53-Plasmacytoid-DC GSM258650.CEL  
52-Plasmacytoid-DC GSM258649.CEL  
51-CD8a-DC GSM258648.CEL  
50-CD8a-DC GSM258647.CEL  
49-CD8a+DC GSM258646.CEL  
48-CD8a+DC GSM258646.CEL  
47-NK-cells GSM258732.CEL  
46-NK-cells GSM258731.CEL  
45-Mast-cells-IgE+Ad GSM258718.CEL  
44-Mast-cells-IgE+Ad GSM258717.CEL  
43-Mast-cells-IgE GSM258714.CEL  
42-Mast-cells-IgE GSM258713.CEL  
41-Mast-cells GSM258712.CEL  
40-Granulocytes GSM258711.CEL  
39-Granulocytes GSM258668.CEL  
38-Granulocytes GSM258667.CEL  
37-GMP GSM258666.CEL  
36-GMP GSM258666.CEL  
35-GMP GSM258642.CEL  
34-GMP GSM258642.CEL  
33-MEP GSM258720.CEL  
32-MEP GSM258719.CEL  
31-HESC GSM258770.CEL  
30-HESC GSM258769.CEL  
29-Bone marrow GSM258628.CEL  
28-Bone marrow GSM258627.CEL  
27-paneth-cells-GF GSM116358.CEL  
26-paneth-cells-GF GSM116357.CEL  
25-paneth-cells GSM116350.CEL  
24-paneth-cells GSM116359.CEL  
23-paneth-cells GSM318589.CEL  
22-paneth-cells GSM318590.CEL  
21-Column-crypt GSM480375.CEL  
20-Column-crypt GSM480374.CEL  
19-Column-Vill GSM480363.CEL  
18-Column-Vill GSM480362.CEL  
17-Column-IEC-GF GSM349880.CEL  
16-Column-IEC-GF GSM350375.CEL  
15-Ileum-IEC GSM350376.CEL  
14-Ileum-IEC GSM350371.CEL  
13-Small-intestine-epithelium RMINEP002001.CEL  
12-Small-intestine-epithelium RMINEP001001.CEL  
11-FAE-RMPYEP002001.CEL  
10-FAE-RMPYEP001001.CEL  
09-Ileum-IEC GSM190797.CEL  
08-Ileum-IEC GSM190796.CEL  
07-Ileum-IEC GSM190795.CEL  
06-CT-v-M-cells GSM190794.CEL  
05-CT-v-M-cells GSM190793.CEL  
04-CT-v-M-cells GSM190792.CEL  
03-PP-M-cells GSM190791.CEL  
02-PP-M-cells GSM190790.CEL  
01-PP-M-cells GSM190789.CEL



## Cluster0134\_intestine-related (14 nodes)

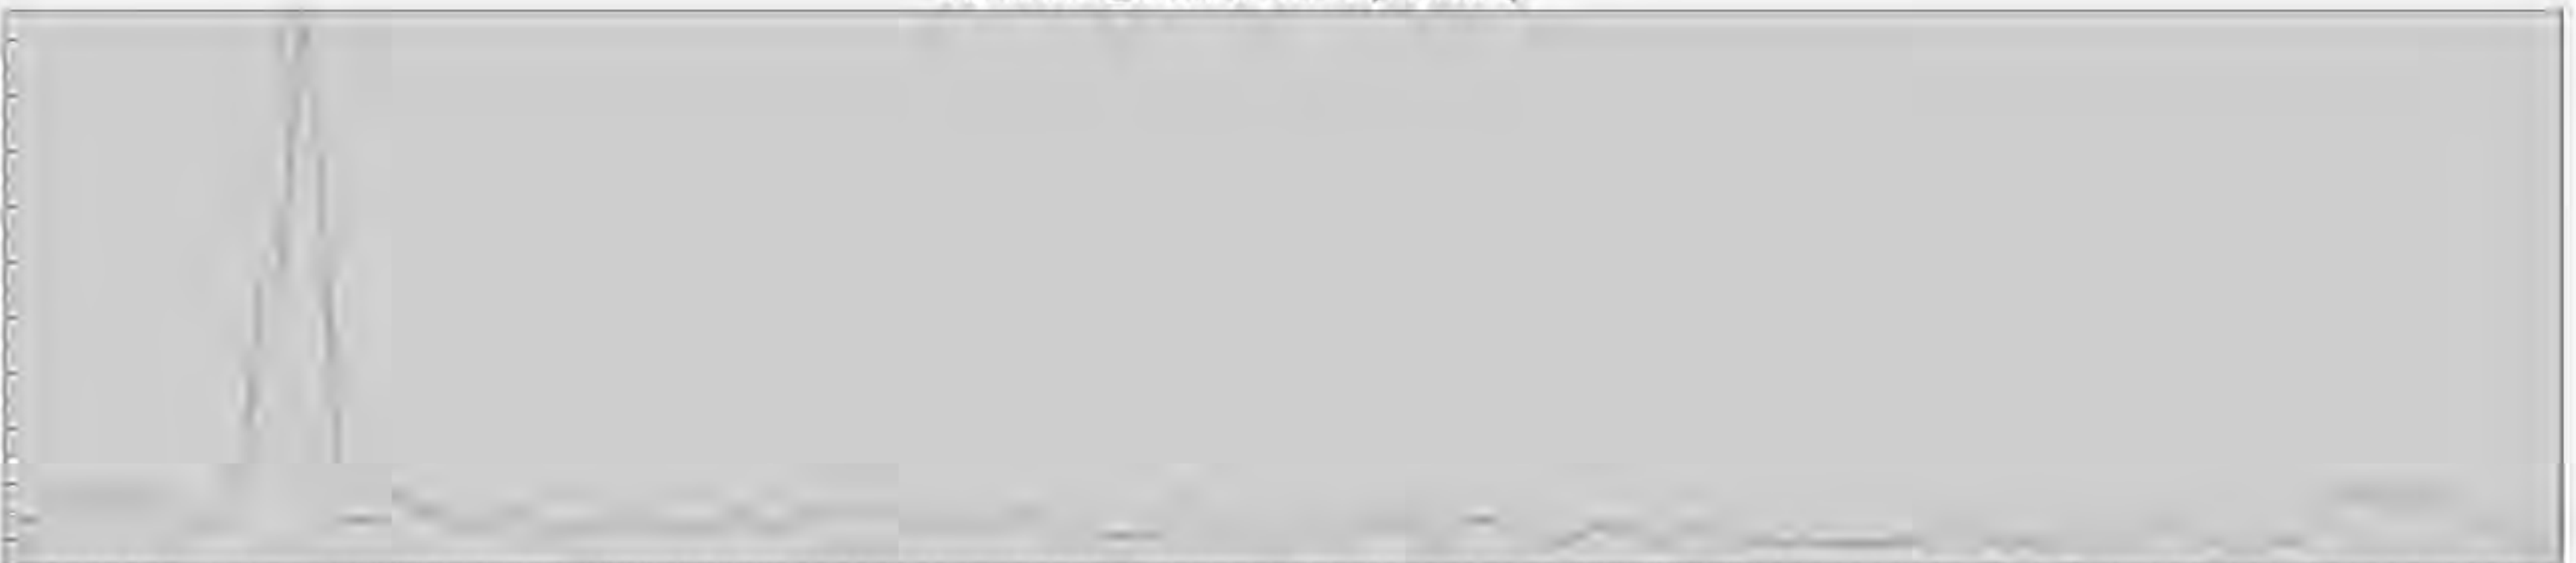

|     |                            |              |     |
|-----|----------------------------|--------------|-----|
| 01  | PP-M-cells                 | GSM190789    | CEL |
| 02  | PP-M-cells                 | GSM190790    | CEL |
| 03  | PP-M-cells                 | GSM190791    | CEL |
| 04  | CT-Y-M-cells               | GSM190792    | CEL |
| 05  | CT-Y-M-cells               | GSM190793    | CEL |
| 06  | CT-W-M-cells               | GSM190794    | CEL |
| 07  | Ileum-IEC                  | GSM190795    | CEL |
| 08  | Ileum-IEC                  | GSM190796    | CEL |
| 09  | Ileum-IEC                  | GSM190797    | CEL |
| 10  | FAE-RMPYEP001001           | CEL          |     |
| 11  | FAE-RMPYEP002001           | CEL          |     |
| 12  | Small-intestine-epithelium | RMINEP001001 | CEL |
| 13  | Small-intestine-epithelium | RMINEP002001 | CEL |
| 14  | Ileum-IEC                  | GSM350371    | CEL |
| 15  | Ileum-IEC                  | GSM350375    | CEL |
| 16  | Colon-Vill                 | GSM480362    | cel |
| 17  | Colon-Vill                 | GSM480363    | cel |
| 18  | Colon-Vill                 | GSM480364    | cel |
| 19  | Colon-Crypt                | GSM480374    | cel |
| 20  | Colon-Crypt                | GSM480375    | cel |
| 21  | Colon-Crypt                | GSM480376    | cel |
| 22  | Paneth-cells               | GSM318590    | CEL |
| 23  | Paneth-cells               | GSM318591    | CEL |
| 24  | Paneth-cells               | GSM116359    | CEL |
| 25  | Paneth-cells               | GSM116359    | CEL |
| 26  | Paneth-cells               | GSM116357    | CEL |
| 27  | Paneth-cells               | GSM116357    | CEL |
| 28  | Bone marrow                | GSM258627    | CEL |
| 29  | Bone marrow                | GSM258628    | CEL |
| 30  | HS                         | GSM258770    | CEL |
| 31  | HS                         | GSM258771    | CEL |
| 32  | MEP                        | GSM258772    | CEL |
| 33  | MEP                        | GSM258773    | CEL |
| 34  | MEP                        | GSM258774    | CEL |
| 35  | MEP                        | GSM258775    | CEL |
| 36  | GMP                        | GSM258665    | CEL |
| 37  | GMP                        | GSM258666    | CEL |
| 38  | GMP                        | GSM258667    | CEL |
| 39  | Granulocytes               | GSM258668    | CEL |
| 40  | Mast-cells                 | GSM258771    | CEL |
| 41  | Mast-cells                 | GSM258772    | CEL |
| 42  | Mast-cells                 | GSM258773    | CEL |
| 43  | Mast-cells                 | GSM258774    | CEL |
| 44  | Mast-cells                 | GSM258775    | CEL |
| 45  | Mast-cells                 | GSM258776    | CEL |
| 46  | NK-cells                   | GSM258777    | CEL |
| 47  | NK-cells                   | GSM258778    | CEL |
| 48  | CD8a+DC                    | GSM258646    | CEL |
| 49  | CD8a+DC                    | GSM258647    | CEL |
| 50  | CD8a-DC                    | GSM258647    | CEL |
| 51  | CD8a-DC                    | GSM258648    | CEL |
| 52  | CD8a-DC                    | GSM258649    | CEL |
| 53  | Ismacryoid-DC              | GSM258650    | CEL |
| 54  | MM                         | GSM258694    | CEL |
| 55  | MM                         | GSM258694    | CEL |
| 56  | MM                         | GSM258701    | CEL |
| 57  | MM                         | GSM258702    | CEL |
| 58  | MM                         | GSM258703    | CEL |
| 59  | MM                         | GSM258704    | CEL |
| 60  | MM                         | GSM258705    | CEL |
| 61  | MM                         | GSM258706    | CEL |
| 62  | Microglia                  | GSM258721    | CEL |
| 63  | Microglia                  | GSM258722    | CEL |
| 64  | Osteoclasts                | GSM258743    | CEL |
| 65  | Osteoclasts                | GSM258744    | CEL |
| 66  | Thymocyte-DN               | GSM465595    | CEL |
| 67  | T-cells-CD4+               | GSM258773    | CEL |
| 68  | T-cells-CD4+               | GSM258774    | CEL |
| 69  | T-cells-CD8+               | GSM258775    | CEL |
| 70  | T-cells-CD8+               | GSM258776    | CEL |
| 71  | Tregs                      | GSM258778    | CEL |
| 72  | Tregs                      | GSM258778    | CEL |
| 73  | BAF3                       | GSM258619    | CEL |
| 74  | BAF3                       | GSM258620    | CEL |
| 75  | MZ-Bcell                   | GSM258621    | CEL |
| 76  | MZ-Bcell                   | GSM258622    | CEL |
| 77  | Follicular-Bcells          | GSM258664    | CEL |
| 78  | Follicular-Bcells          | GSM258664    | CEL |
| 79  | F-LY-RMLNDC002001          | CEL          |     |
| 80  | F-LY-RMLNDC003001          | CEL          |     |
| 81  | PP-FDC                     | GSM481976    | CEL |
| 82  | PP-FDC                     | GSM481978    | CEL |
| 83  | PP-FDC                     | GSM481977    | CEL |
| 84  | Lymph-endo-cells           | GSM143704    | CEL |
| 85  | MS-1                       | GSM234692    | CEL |
| 86  | Nat Helper cell            | GSM465593    | CEL |
| 87  | Nat Helper cell            | GSM465594    | CEL |
| 88  | Chondrocytes               | GSM266741    | CEL |
| 89  | Chondrocytes               | GSM266740    | CEL |
| 90  | Osteoblast-d5              | GSM258741    | CEL |
| 91  | Osteoblast-d5              | GSM258742    | CEL |
| 92  | Osteoblast-d4              | GSM258737    | CEL |
| 93  | Osteoblast-d4              | GSM258737    | CEL |
| 94  | Osteoblast-d14             | GSM258738    | CEL |
| 95  | Osteoblast-d21             | GSM258739    | CEL |
| 96  | Osteoblast-d21             | GSM258739    | CEL |
| 97  | OT12                       | GSM258631    | CEL |
| 98  | OT12                       | GSM258632    | CEL |
| 99  | 3T3-L1                     | GSM258609    | CEL |
| 100 | 3T3-L1                     | GSM258610    | CEL |
| 101 | NH3T3                      | GSM258739    | CEL |
| 102 | NH3T3                      | GSM258739    | CEL |
| 103 | C2C12                      | GSM258629    | CEL |
| 104 | C2C12                      | GSM258630    | CEL |
| 105 | Bruce4                     | GSM258656    | CEL |
| 106 | Bruce4                     | GSM258656    | CEL |
| 107 | MIMCD3                     | GSM258723    | CEL |
| 108 | MIMCD3                     | GSM258724    | CEL |
| 109 | mim6                       | GSM258725    | CEL |
| 110 | mim6                       | GSM258726    | CEL |
| 111 | Astrocytes                 | GSM241898    | CEL |
| 112 | Neuro2a                    | GSM258727    | CEL |
| 113 | Spleen                     | GSM258767    | CEL |
| 114 | Spleen                     | GSM258767    | CEL |
| 115 | Lymph-nodes                | GSM258691    | CEL |
| 116 | Lymph-nodes                | GSM258691    | CEL |
| 117 | Intestine-small            | GSM258677    | CEL |
| 118 | Intestine-small            | GSM258677    | CEL |
| 119 | Intestine-large            | GSM258678    | CEL |
| 120 | Intestine-large            | GSM258678    | CEL |
| 121 | Intestine-large            | GSM258676    | CEL |
| 122 | Intestine-large            | GSM258675    | CEL |
| 123 | Colon-d4                   | GSM198810    | CEL |
| 124 | Colon-d4                   | GSM198810    | CEL |
| 125 | Colon-d9                   | GSM198810    | CEL |
| 126 | Colon-d9                   | GSM198810    | CEL |
| 127 | NALT                       | GSM289408    | CEL |
| 128 | NALT                       | GSM289409    | CEL |
| 129 | NALT                       | GSM289410    | CEL |
| 130 | NALT                       | GSM289411    | CEL |



Cluster0135\_Uncertain (14 nodes)

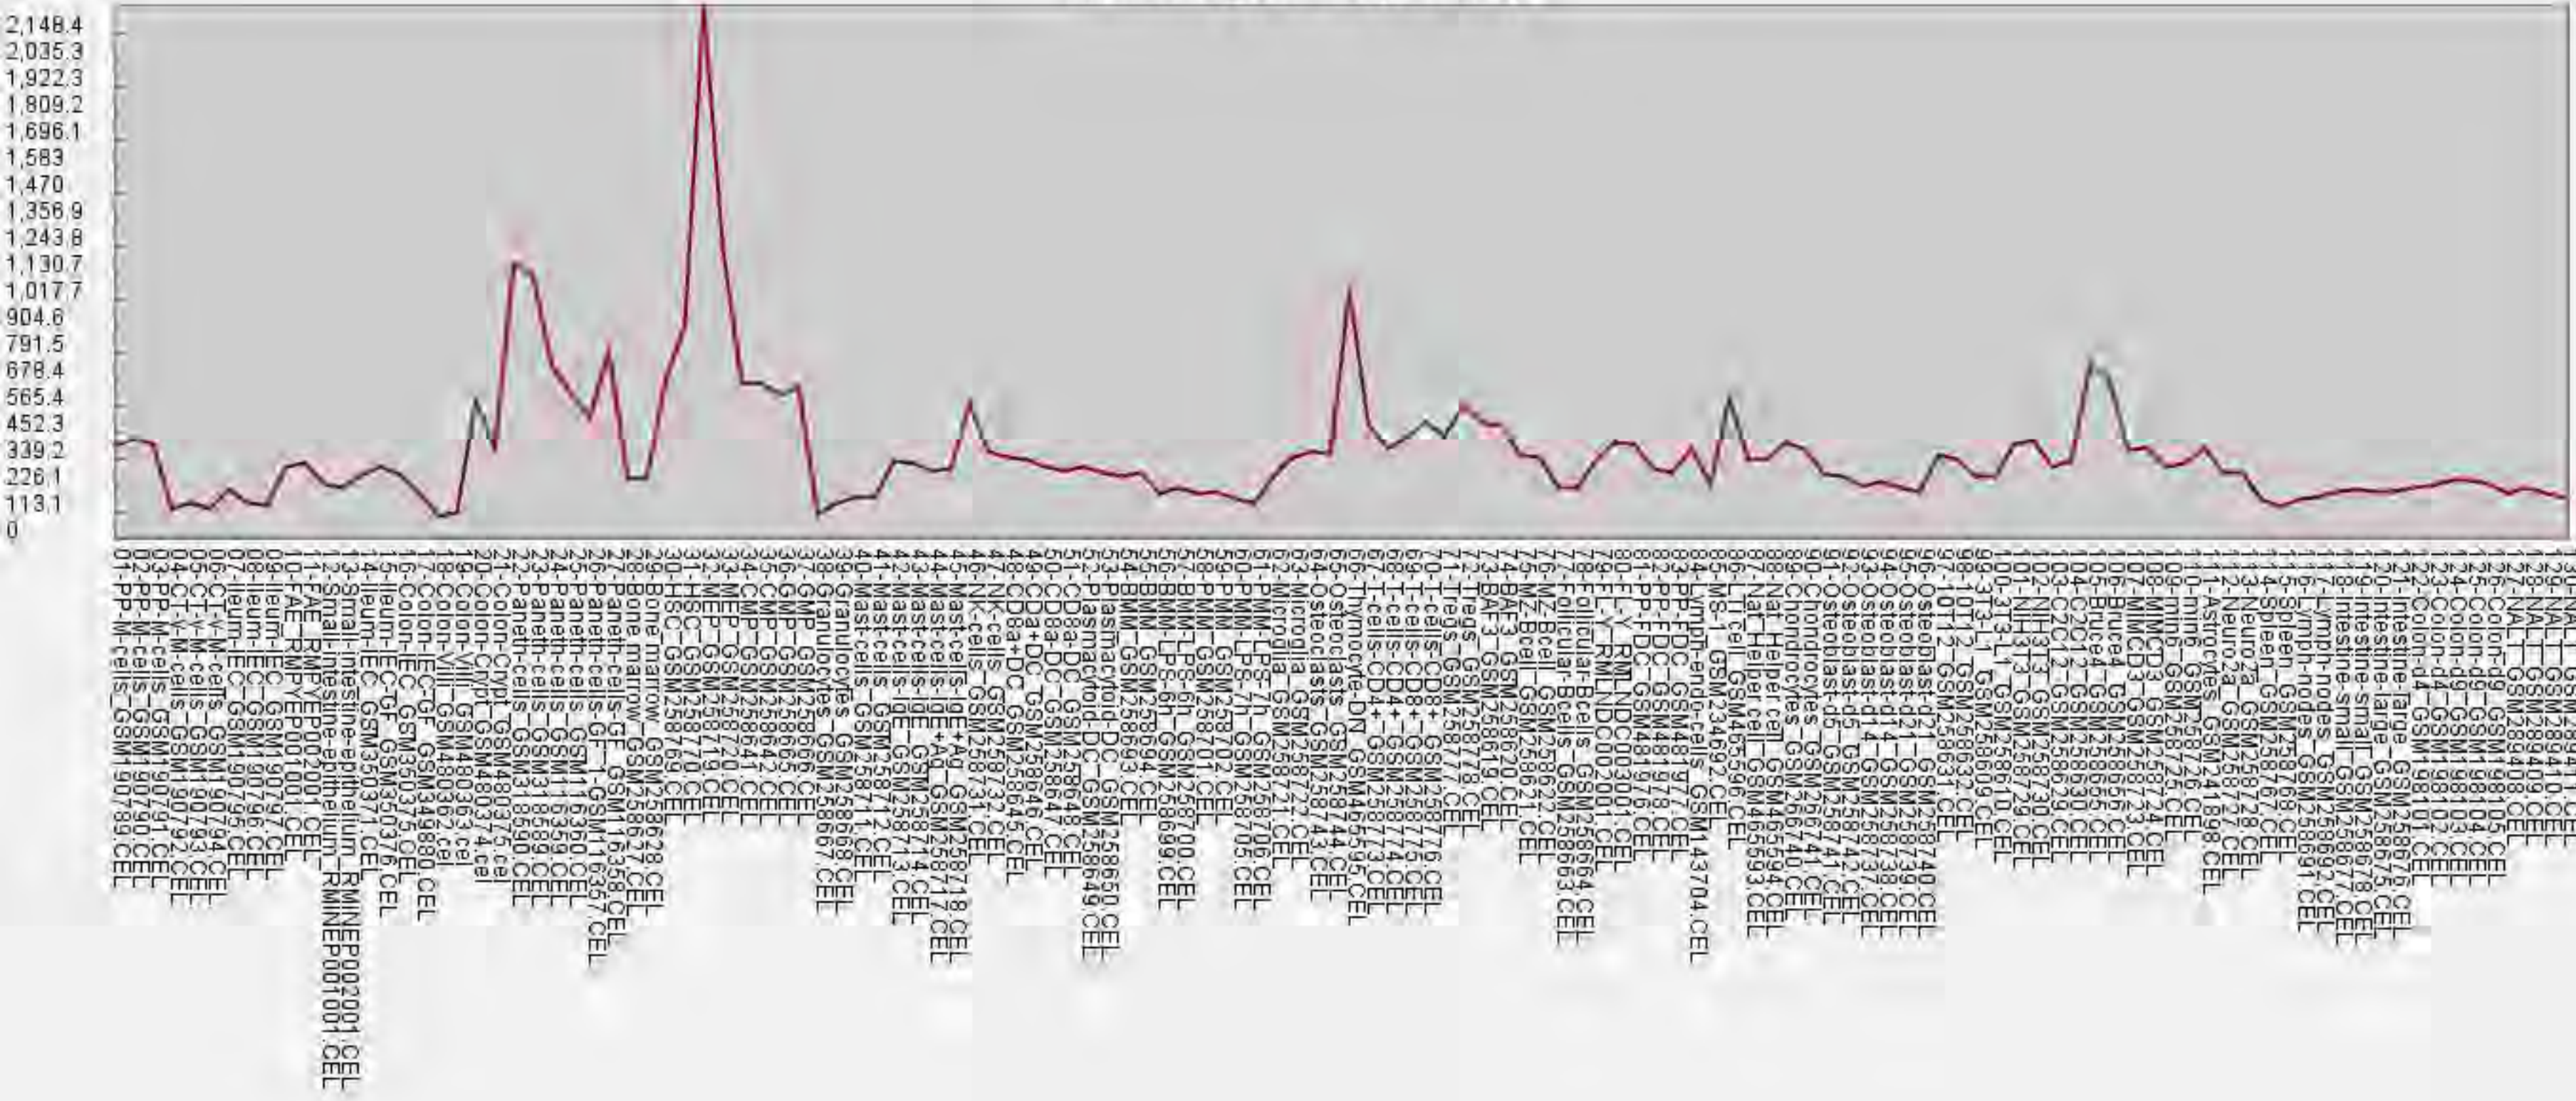







## Cluster0137\_Uncertain (14 nodes)

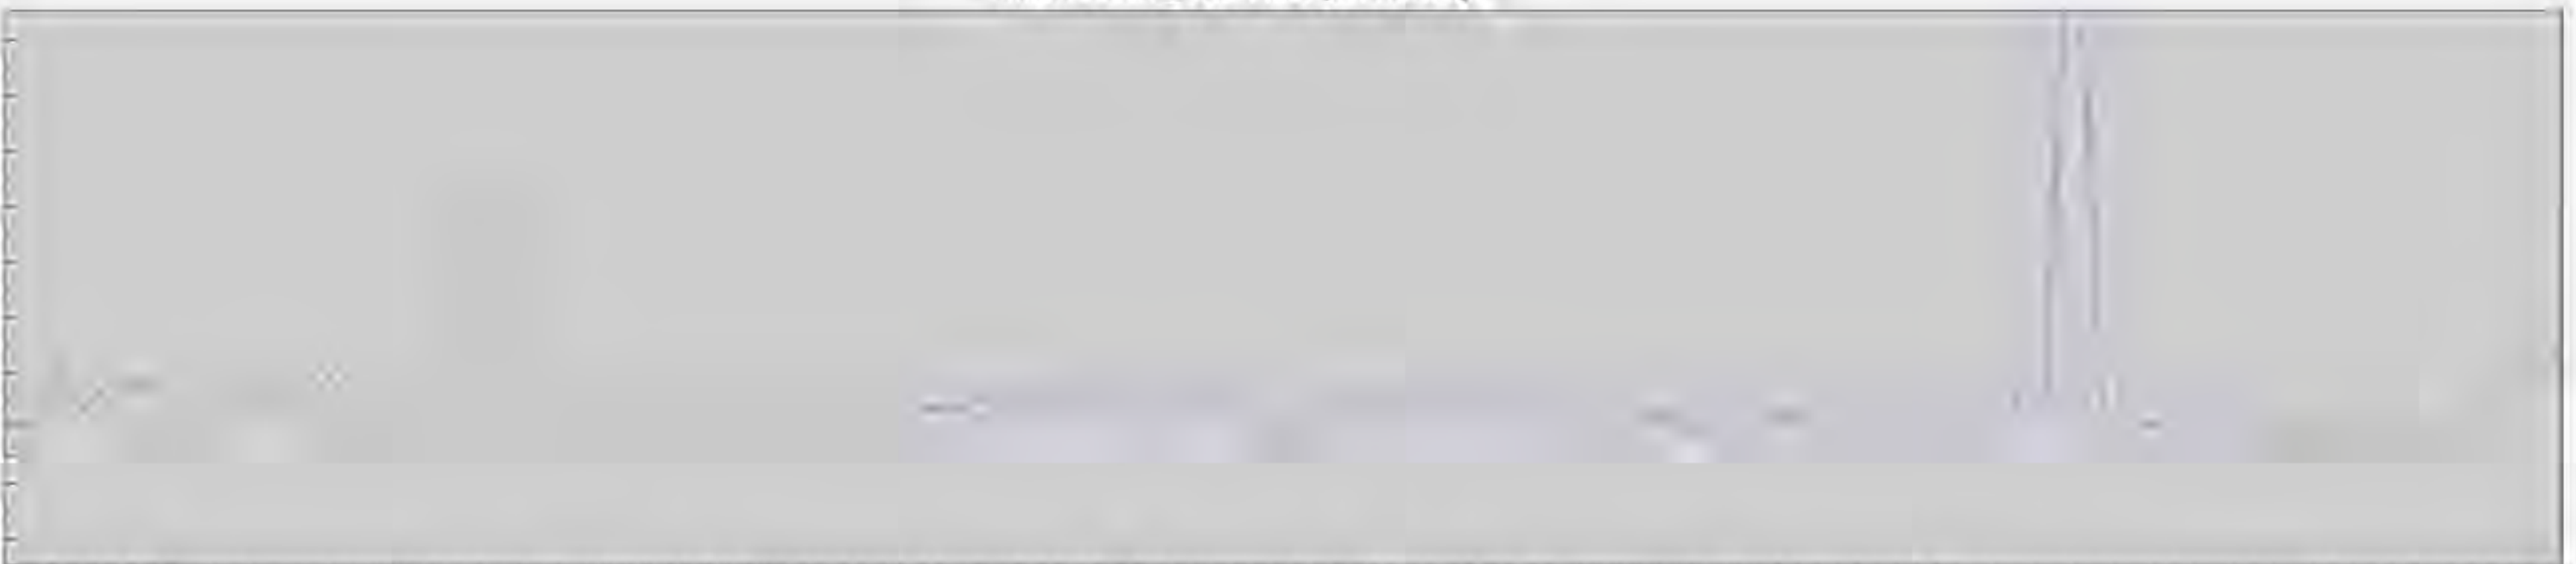

|       |                            |              |      |
|-------|----------------------------|--------------|------|
| 104.7 |                            |              |      |
| 99.2  |                            |              |      |
| 93.7  |                            |              |      |
| 88.2  |                            |              |      |
| 82.7  |                            |              |      |
| 77.2  |                            |              |      |
| 71.6  |                            |              |      |
| 66.1  |                            |              |      |
| 60.6  |                            |              |      |
| 55.1  |                            |              |      |
| 49.6  |                            |              |      |
| 44.1  |                            |              |      |
| 38.6  |                            |              |      |
| 33.1  |                            |              |      |
| 27.6  |                            |              |      |
| 22    |                            |              |      |
| 16.5  |                            |              |      |
| 11    |                            |              |      |
| 5.5   |                            |              |      |
| 0     |                            |              |      |
| 130   | NALT                       | GSM289411    | CELL |
| 129   | NALT                       | GSM289410    | CELL |
| 128   | NALT                       | GSM289409    | CELL |
| 127   | NALT                       | GSM289408    | CELL |
| 126   | Colon-d9                   | GSM1988104   | CELL |
| 125   | Colon-d9                   | GSM1988103   | CELL |
| 124   | Colon-d9                   | GSM1988102   | CELL |
| 123   | Colon-d4                   | GSM1988101   | CELL |
| 122   | Colon-d4                   | GSM1988100   | CELL |
| 121   | Intestine-large            | GSM258676    | CELL |
| 120   | Intestine-large            | GSM258675    | CELL |
| 119   | Intestine-small            | GSM258678    | CELL |
| 118   | Intestine-small            | GSM258677    | CELL |
| 117   | Lymph-nodes                | GSM258691    | CELL |
| 116   | Lymph-nodes                | GSM258690    | CELL |
| 115   | Spleen                     | GSM258707    | CELL |
| 114   | Spleen                     | GSM258708    | CELL |
| 113   | Neuro2a                    | GSM258727    | CELL |
| 112   | Neuro2a                    | GSM258728    | CELL |
| 111   | Astrocytes                 | GSM241899    | CELL |
| 110   | mim6                       | GSM258726    | CELL |
| 109   | mim6                       | GSM258725    | CELL |
| 108   | MIMCD3                     | GSM258724    | CELL |
| 107   | MIMCD3                     | GSM258723    | CELL |
| 106   | Bruce4                     | GSM258656    | CELL |
| 105   | Bruce4                     | GSM258655    | CELL |
| 104   | C2C12                      | GSM258690    | CELL |
| 103   | C2C12                      | GSM258689    | CELL |
| 102   | NH3T3                      | GSM258730    | CELL |
| 101   | NH3T3                      | GSM258729    | CELL |
| 100   | 3T3-L1                     | GSM258610    | CELL |
| 99    | 3T3-L1                     | GSM258609    | CELL |
| 98    | 10T12                      | GSM258632    | CELL |
| 97    | 10T12                      | GSM258631    | CELL |
| 96    | Osteoblast-d21             | GSM258740    | CELL |
| 95    | Osteoblast-d21             | GSM258739    | CELL |
| 94    | Osteoblast-d14             | GSM258738    | CELL |
| 93    | Osteoblast-d14             | GSM258737    | CELL |
| 92    | Osteoblast-d5              | GSM258742    | CELL |
| 91    | Osteoblast-d5              | GSM258741    | CELL |
| 90    | Chondrocytes               | GSM266741    | CELL |
| 89    | Chondrocytes               | GSM266740    | CELL |
| 88    | Nat Helper cell            | GSM465594    | CELL |
| 87    | Nat Helper cell            | GSM465593    | CELL |
| 86    | Tt cell                    | GSM465596    | CELL |
| 85    | MS-1                       | GSM234692    | CELL |
| 84    | Lymph-endo-cells           | GSM143704    | CELL |
| 83    | PP-FDC                     | GSM481977    | CELL |
| 82    | PP-FDC                     | GSM481978    | CELL |
| 81    | PP-FDC                     | GSM481976    | CELL |
| 80    | E-LY                       | RMLNDC003001 | CELL |
| 79    | E-LY                       | RMLNDC003001 | CELL |
| 78    | Follicular-Bcells          | GSM258664    | CELL |
| 77    | Follicular-Bcells          | GSM258663    | CELL |
| 76    | MZ-Bcell                   | GSM258622    | CELL |
| 75    | MZ-Bcell                   | GSM258621    | CELL |
| 74    | BAF3                       | GSM258620    | CELL |
| 73    | BAF3                       | GSM258619    | CELL |
| 72    | Tregs                      | GSM258778    | CELL |
| 71    | T-cells-CD8+               | GSM258777    | CELL |
| 70    | T-cells-CD8+               | GSM258776    | CELL |
| 69    | T-cells-CD4+               | GSM258774    | CELL |
| 68    | T-cells-CD4+               | GSM258773    | CELL |
| 67    | T-cells-CD4+               | GSM258744    | CELL |
| 66    | Thymocyte-DN               | GSM465595    | CELL |
| 65    | Osteoclasts                | GSM258743    | CELL |
| 64    | Microglia                  | GSM258721    | CELL |
| 63    | Microglia                  | GSM258721    | CELL |
| 62    | MM-LPS-7h                  | GSM258706    | CELL |
| 61    | MM-LPS-7h                  | GSM258706    | CELL |
| 60    | MM-LPS-6h                  | GSM258702    | CELL |
| 59    | MM-LPS-6h                  | GSM258702    | CELL |
| 58    | MM-LPS-6h                  | GSM258699    | CELL |
| 57    | MM-LPS-6h                  | GSM258699    | CELL |
| 56    | MM-LPS-6h                  | GSM258694    | CELL |
| 55    | MM-LPS-6h                  | GSM258694    | CELL |
| 54    | MM-LPS-6h                  | GSM258694    | CELL |
| 53    | MM-LPS-6h                  | GSM258694    | CELL |
| 52    | MM-LPS-6h                  | GSM258694    | CELL |
| 51    | MM-LPS-6h                  | GSM258694    | CELL |
| 50    | CD8a-DC                    | GSM258647    | CELL |
| 49    | CD8a-DC                    | GSM258647    | CELL |
| 48    | CD8a+DC                    | GSM258646    | CELL |
| 47    | NK-cells                   | GSM258732    | CELL |
| 46    | NK-cells                   | GSM258731    | CELL |
| 45    | Mast-cells-IgE+Ad          | GSM258719    | CELL |
| 44    | Mast-cells-IgE+Ad          | GSM258717    | CELL |
| 43    | Mast-cells-IgE             | GSM258714    | CELL |
| 42    | Mast-cells-IgE             | GSM258713    | CELL |
| 41    | Mast-cells                 | GSM258712    | CELL |
| 40    | Granulocytes               | GSM258668    | CELL |
| 39    | Granulocytes               | GSM258667    | CELL |
| 38    | GMP                        | GSM258666    | CELL |
| 37    | GMP                        | GSM258665    | CELL |
| 36    | GMP                        | GSM258665    | CELL |
| 35    | GMP                        | GSM258642    | CELL |
| 34    | GMP                        | GSM258642    | CELL |
| 33    | MIEP                       | GSM258720    | CELL |
| 32    | MIEP                       | GSM258719    | CELL |
| 31    | HESC                       | GSM258770    | CELL |
| 30    | HESC                       | GSM258770    | CELL |
| 29    | Bone marrow                | GSM258628    | CELL |
| 28    | Bone marrow                | GSM258627    | CELL |
| 27    | paneth-cells-GF            | GSM116358    | CELL |
| 26    | paneth-cells-GF            | GSM116357    | CELL |
| 25    | paneth-cells               | GSM116350    | CELL |
| 24    | paneth-cells               | GSM116359    | CELL |
| 23    | paneth-cells               | GSM318589    | CELL |
| 22    | paneth-cells               | GSM318590    | CELL |
| 21    | Colon-Crypt                | GSM480375    | cel  |
| 20    | Colon-Crypt                | GSM480374    | cel  |
| 19    | Colon-Vill                 | GSM480363    | cel  |
| 18    | Colon-Vill                 | GSM480362    | cel  |
| 17    | Colon-IEC-GF               | GSM349880    | CEL  |
| 16    | Colon-IEC-GF               | GSM350375    | CEL  |
| 15    | Ileum-IEC                  | GSM350376    | CEL  |
| 14    | Ileum-IEC                  | GSM350371    | CEL  |
| 13    | Small-intestine-epithelium | RMINEP002901 | CEL  |
| 12    | Small-intestine-epithelium | RMINEP001001 | CEL  |
| 11    | FAE-RMP                    | EP002001     | CEL  |
| 10    | FAE-RMP                    | EP001001     | CEL  |
| 09    | Ileum-IEC                  | GSM190797    | CELL |
| 08    | Ileum-IEC                  | GSM190796    | CELL |
| 07    | Ileum-IEC                  | GSM190795    | CELL |
| 06    | CT-w-M-cells               | GSM190794    | CELL |
| 05    | CT-w-M-cells               | GSM190793    | CELL |
| 04    | CT-y-M-cells               | GSM190792    | CELL |
| 03    | PP-M-cells                 | GSM190791    | CELL |
| 02    | PP-M-cells                 | GSM190790    | CELL |
| 01    | PP-M-cells                 | GSM190789    | CELL |



Cluster0138\_Phagocyte-related (14 nodes)

9,343  
8,851.2  
8,359.5  
7,867.7  
7,376  
6,884.3  
6,392.5  
5,900.8  
5,409.1  
4,917.3  
4,425.6  
3,933.9  
3,442.1  
2,950.4  
2,458.7  
1,966.9  
1,475.2  
983.5  
491.7  
0

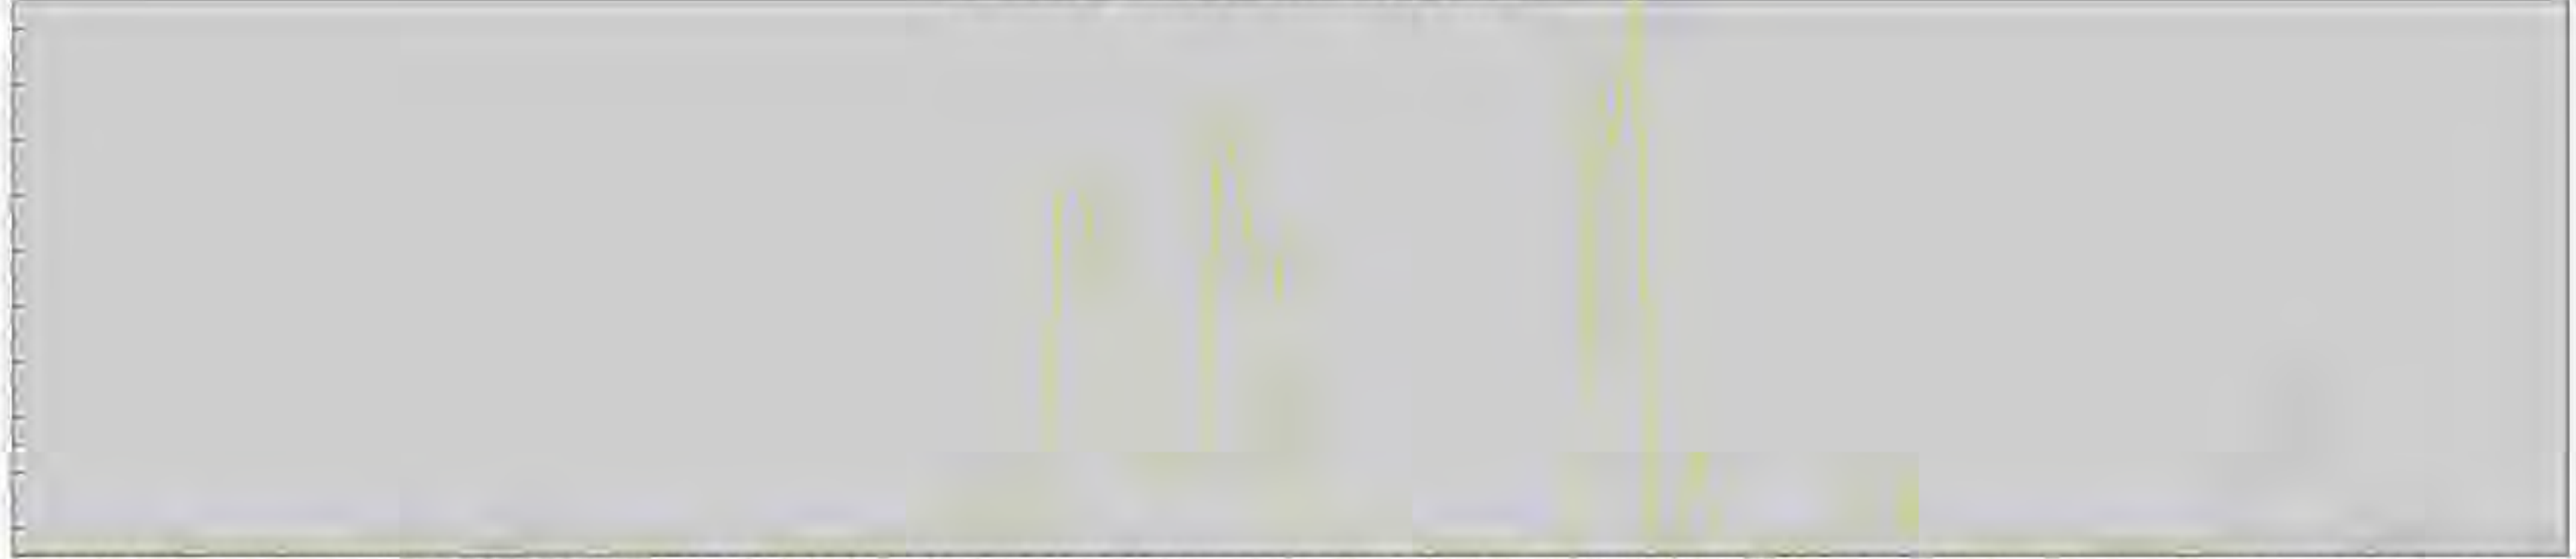

130-NALT GSM289411 CELL  
129-NALT GSM289410 CELL  
128-NALT GSM289409 CELL  
127-NALT GSM289408 CELL  
126-CD9 GSM1988105 CELL  
125-CD9 GSM1988104 CELL  
124-CD9 GSM1988103 CELL  
123-CD9 GSM1988102 CELL  
122-CD9 GSM1988101 CELL  
121-Intestine-large GSM258676 CELL  
120-Intestine-large GSM258675 CELL  
119-Intestine-small GSM258678 CELL  
118-Intestine-small GSM258679 CELL  
117-Lymph-nodes GSM258691 CELL  
116-Lymph-nodes GSM258726 CELL  
115-Spleen GSM258766 CELL  
114-Spleen GSM258767 CELL  
113-Neuro2a GSM258728 CELL  
112-Neuro2a GSM258727 CELL  
111-Astrocytes GSM241898 CELL  
110-mim6 GSM258725 CELL  
109-mim6 GSM258724 CELL  
108-MIMCD3 GSM258723 CELL  
107-MIMCD3 GSM258722 CELL  
106-Bruce4 GSM258656 CELL  
105-Bruce4 GSM258655 CELL  
104-C2C12 GSM258690 CELL  
103-C2C12 GSM258689 CELL  
102-NH3T3 GSM258730 CELL  
101-NH3T3 GSM258729 CELL  
100-3T3-L1 GSM258610 CELL  
99-3T3-L1 GSM258609 CELL  
98-10T12 GSM258632 CELL  
97-10T12 GSM258631 CELL  
96-Osteoblast-d21 GSM258740 CELL  
95-Osteoblast-d21 GSM258739 CELL  
94-Osteoblast-d14 GSM258738 CELL  
93-Osteoblast-d14 GSM258737 CELL  
92-Osteoblast-d5 GSM258742 CELL  
91-Osteoblast-d5 GSM258741 CELL  
90-Chondrocytes GSM266741 CELL  
89-Chondrocytes GSM266740 CELL  
88-Nat Helper cell GSM465594 CELL  
87-Nat Helper cell GSM465593 CELL  
86-LT cell GSM465596 CELL  
85-M8-1 GSM234692 CELL  
84-Lymph-endo-cells GSM143704 CELL  
83-P-FDC GSM481977 CELL  
82-P-FDC GSM481978 CELL  
81-P-FDC GSM481976 CELL  
80-L-Y RMLNDCC003001 CELL  
79-L-Y RMLNDCC003001 CELL  
78-Follicular-Bcells GSM258664 CELL  
77-Follicular-Bcells GSM258663 CELL  
76-MZ-Bcell GSM258627 CELL  
75-MZ-Bcell GSM258627 CELL  
74-BAF3 GSM258620 CELL  
73-BAF3 GSM258619 CELL  
72-Tregs GSM258778 CELL  
71-Tregs GSM258777 CELL  
70-T-cells-CD8+ GSM258776 CELL  
69-T-cells-CD8+ GSM258774 CELL  
68-T-cells-CD4+ GSM258773 CELL  
67-T-cells-CD4+ GSM258744 CELL  
66-Thymocyte-DN GSM465595 CELL  
65-Osteoclasts GSM258743 CELL  
64-Osteoclasts GSM258743 CELL  
63-Microglia GSM258721 CELL  
62-Microglia GSM258721 CELL  
61-MM-LPS-7h GSM258706 CELL  
60-MM-LPS-7h GSM258706 CELL  
59-MM-LPS-6h GSM258702 CELL  
58-MM-LPS-6h GSM258702 CELL  
57-MM-LPS-6h GSM258699 CELL  
56-MM-LPS-6h GSM258699 CELL  
55-MM-LPS-6h GSM258694 CELL  
54-MM-LPS-6h GSM258694 CELL  
53-Plasmacytoid-DC GSM258650 CELL  
52-Plasmacytoid-DC GSM258649 CELL  
51-CD8a-DC GSM258648 CELL  
50-CD8a-DC GSM258647 CELL  
49-CD8a+DC GSM258646 CELL  
48-CD8a+DC GSM258646 CELL  
47-NK-cells GSM258732 CELL  
46-NK-cells GSM258731 CELL  
45-Mast-cells-IgE+Ad GSM258719 CELL  
44-Mast-cells-IgE+Ad GSM258717 CELL  
43-Mast-cells-IgE GSM258714 CELL  
42-Mast-cells-IgE GSM258713 CELL  
41-Mast-cells GSM258712 CELL  
40-Granulocytes GSM258668 CELL  
39-Granulocytes GSM258667 CELL  
38-GMP GSM258666 CELL  
37-GMP GSM258665 CELL  
36-GMP GSM258664 CELL  
35-CMP GSM258642 CELL  
34-MEP GSM258641 CELL  
33-MEP GSM258720 CELL  
32-MEP GSM258719 CELL  
31-HSC GSM258770 CELL  
30-HSC GSM258769 CELL  
29-Bone marrow GSM258628 CELL  
28-Bone marrow GSM258627 CELL  
27-paneth-cells-GE GSM116358 CELL  
26-paneth-cells-GE GSM116357 CELL  
25-paneth-cells GSM116350 CELL  
24-paneth-cells GSM116359 CELL  
23-paneth-cells GSM318589 CELL  
22-paneth-cells GSM318590 CELL  
21-CD9 GSM480375 CELL  
20-CD9 GSM480374 CELL  
19-CD9 GSM480363 CELL  
18-CD9 GSM480362 CELL  
17-CD9 GSM349880 CELL  
16-CD9 GSM350375 CELL  
15-Intestine-epithelium RMINEP002001 CELL  
14-Intestine-epithelium RMINEP001001 CELL  
13-Small intestine-epithelium RMINEP002001 CELL  
12-Small intestine-epithelium RMINEP001001 CELL  
11-FAE RMPYEP002001 CELL  
10-FAE RMPYEP001001 CELL  
09-Ileum-IEC GSM190797 CELL  
08-Ileum-IEC GSM190796 CELL  
07-Ileum-IEC GSM190795 CELL  
06-CT-v-M-cells GSM190794 CELL  
05-CT-v-M-cells GSM190793 CELL  
04-CT-v-M-cells GSM190792 CELL  
03-PP-M-cells GSM190791 CELL  
02-PP-M-cells GSM190790 CELL  
01-PP-M-cells GSM190789 CELL



Cluster0139\_High in MEP (13 nodes)

557.5  
528.2  
498.8  
469.5  
440.1  
410.8  
381.4  
352.1  
322.8  
293.4  
264.1  
234.7  
205.4  
176.1  
146.7  
117.4  
88  
58.7  
29.3  
0

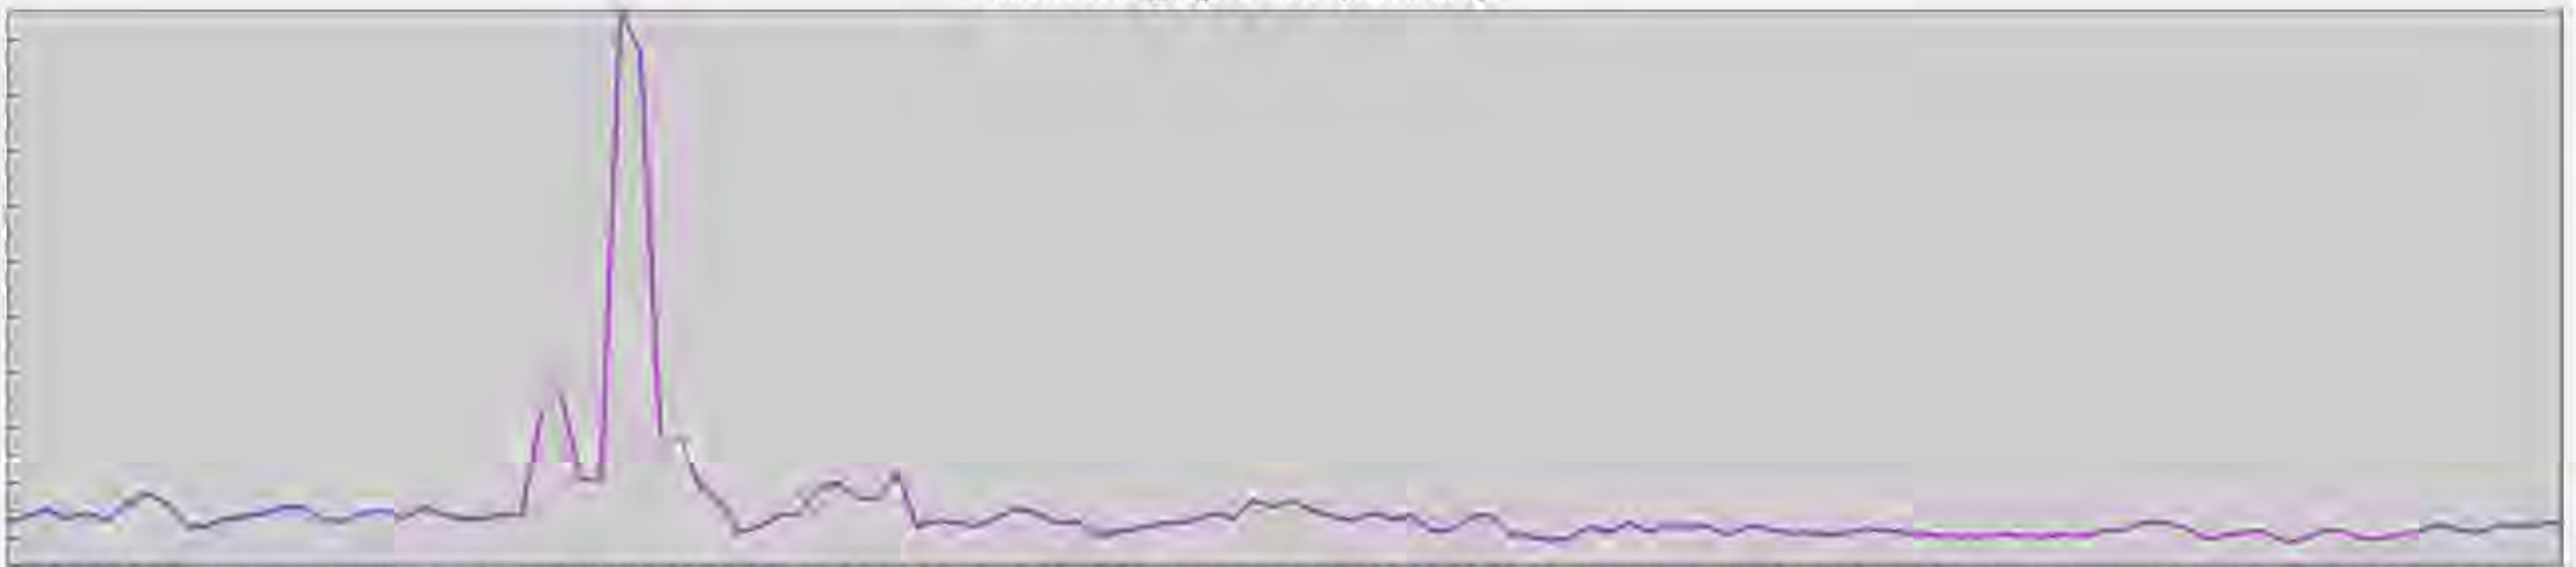

130-NALT GSM289411.CEL  
129-NALT GSM289410.CEL  
128-NALT GSM289409.CEL  
127-NALT GSM289408.CEL  
126-Colon-d9 GSM1988105.CEL  
125-Colon-d9 GSM1988104.CEL  
124-Colon-d9 GSM1988103.CEL  
123-Colon-d4 GSM1988102.CEL  
122-Colon-d4 GSM1988101.CEL  
121-Intestine-large GSM258676.CEL  
120-Intestine-large GSM258675.CEL  
119-Intestine-small GSM258678.CEL  
118-Intestine-small GSM258679.CEL  
117-Lymph-nodes GSM258691.CEL  
116-Lymph-nodes GSM258726.CEL  
115-Spleen GSM258767.CEL  
114-Spleen GSM258767.CEL  
113-Neuro2a GSM258728.CEL  
112-Neuro2a GSM258727.CEL  
111-Astrocytes GSM241898.CEL  
110-mimb GSM258726.CEL  
109-mimb GSM258725.CEL  
108-MIMCD3 GSM258724.CEL  
107-MIMCD3 GSM258723.CEL  
106-Bruce4 GSM258656.CEL  
105-Bruce4 GSM258656.CEL  
104-C2C12 GSM258690.CEL  
103-C2C12 GSM258629.CEL  
102-NH3T3 GSM258739.CEL  
101-NH3T3 GSM258739.CEL  
100-3T3-L1 GSM258610.CEL  
99-3T3-L1 GSM258609.CEL  
98-10T12 GSM258632.CEL  
97-10T12 GSM258631.CEL  
96-Osteoblast-d21 GSM258740.CEL  
95-Osteoblast-d21 GSM258739.CEL  
94-Osteoblast-d14 GSM258738.CEL  
93-Osteoblast-d14 GSM258737.CEL  
92-Osteoblast-d5 GSM258742.CEL  
91-Osteoblast-d5 GSM258741.CEL  
90-Chondrocytes GSM266741.CEL  
89-Nat Helper cell GSM465594.CEL  
88-Nat Helper cell GSM465593.CEL  
87-LT cell GSM465596.CEL  
86-LT cell GSM465596.CEL  
85-MS-1 GSM234692.CEL  
84-Lymph-endo-cells GSM143704.CEL  
83-PP-FDC GSM481977.CEL  
82-PP-FDC GSM481978.CEL  
81-PP-FDC GSM481976.CEL  
80-F-LY RMLNDCC003001.CEL  
79-F-LY RMLNDCC003001.CEL  
78-Follicular-Bcells GSM258664.CEL  
77-Follicular-Bcells GSM258664.CEL  
76-MZ-Bcell GSM258627.CEL  
75-MZ-Bcell GSM258627.CEL  
74-BAF3 GSM258620.CEL  
73-BAF3 GSM258619.CEL  
72-Tregs GSM258778.CEL  
71-Tregs GSM258777.CEL  
70-T-cells-CD8+ GSM258776.CEL  
69-T-cells-CD8+ GSM258774.CEL  
68-T-cells-CD4+ GSM258773.CEL  
67-T-cells-CD4+ GSM258744.CEL  
66-Thymocyte-DN GSM465595.CEL  
65-Osteoclasts GSM258743.CEL  
64-Osteoclasts GSM258743.CEL  
63-Microglia GSM258721.CEL  
62-Microglia GSM258721.CEL  
61-PM-M-PS-7h GSM268706.CEL  
60-PM-M-PS-7h GSM268706.CEL  
59-PM-M-PS-6h GSM258702.CEL  
58-PM-M-PS-6h GSM258702.CEL  
57-BMM-LPS-6h GSM268699.CEL  
56-BMM-LPS-6h GSM268699.CEL  
55-BMM-LPS-6h GSM268699.CEL  
54-BMM-LPS-6h GSM268699.CEL  
53-Iasmacryoid-DC GSM258650.CEL  
52-Iasmacryoid-DC GSM258649.CEL  
51-CD8a-DC GSM258648.CEL  
50-CD8a-DC GSM258647.CEL  
49-CD8a+DC GSM258646.CEL  
48-CD8a+DC GSM258646.CEL  
47-NK-cells GSM258732.CEL  
46-NK-cells GSM258731.CEL  
45-Mast-cells-IgE+Ad GSM258719.CEL  
44-Mast-cells-IgE+Ad GSM258717.CEL  
43-Mast-cells-IgE GSM258714.CEL  
42-Mast-cells-IgE GSM258713.CEL  
41-Mast-cells GSM258712.CEL  
40-Granulocytes GSM258668.CEL  
39-Granulocytes GSM258667.CEL  
38-GMP GSM258666.CEL  
37-GMP GSM258666.CEL  
36-GMP GSM258666.CEL  
35-CMP GSM258642.CEL  
34-CMP GSM258641.CEL  
33-MEP GSM258720.CEL  
32-MEP GSM258719.CEL  
31-HESC GSM258770.CEL  
30-HESC GSM258770.CEL  
29-Bone marrow GSM258628.CEL  
28-Bone marrow GSM258627.CEL  
27-paneth-cells-GE GSM116358.CEL  
26-paneth-cells-GE GSM116357.CEL  
25-paneth-cells GSM116350.CEL  
24-paneth-cells GSM116359.CEL  
23-paneth-cells GSM318589.CEL  
22-paneth-cells GSM318589.CEL  
21-paneth-cells GSM318589.CEL  
20-Colon-Crypt GSM480374.CEL  
19-Colon-Vill GSM480363.CEL  
18-Colon-Vill GSM480362.CEL  
17-Colon-IEC-GE GSM349880.CEL  
16-Colon-IEC-GE GSM350375.CEL  
15-Ileum-IEC GSM350376.CEL  
14-Ileum-IEC GSM350371.CEL  
13-Small-intestine-epithelium RMINEP002001.CEL  
12-Small-intestine-epithelium RMINEP001001.CEL  
11-FAE RMPYEP002001.CEL  
10-FAE RMPYEP001001.CEL  
09-Ileum-IEC GSM190797.CEL  
08-Ileum-IEC GSM190796.CEL  
07-Ileum-IEC GSM190795.CEL  
06-CT-v-M-cells GSM190794.CEL  
05-CT-v-M-cells GSM190793.CEL  
04-CT-v-M-cells GSM190792.CEL  
03-PP-M-cells GSM190790.CEL  
02-PP-M-cells GSM190790.CEL  
01-PP-M-cells GSM190789.CEL



Cluster0140\_intestine-related (13 nodes)

2,392  
2,268.1  
2,140.2  
2,014.4  
1,888.5  
1,762.6  
1,636.7  
1,510.8  
1,384.9  
1,259  
1,133.1  
1,007.2  
881.3  
755.4  
629.5  
503.6  
377.7  
251.8  
125.9  
0

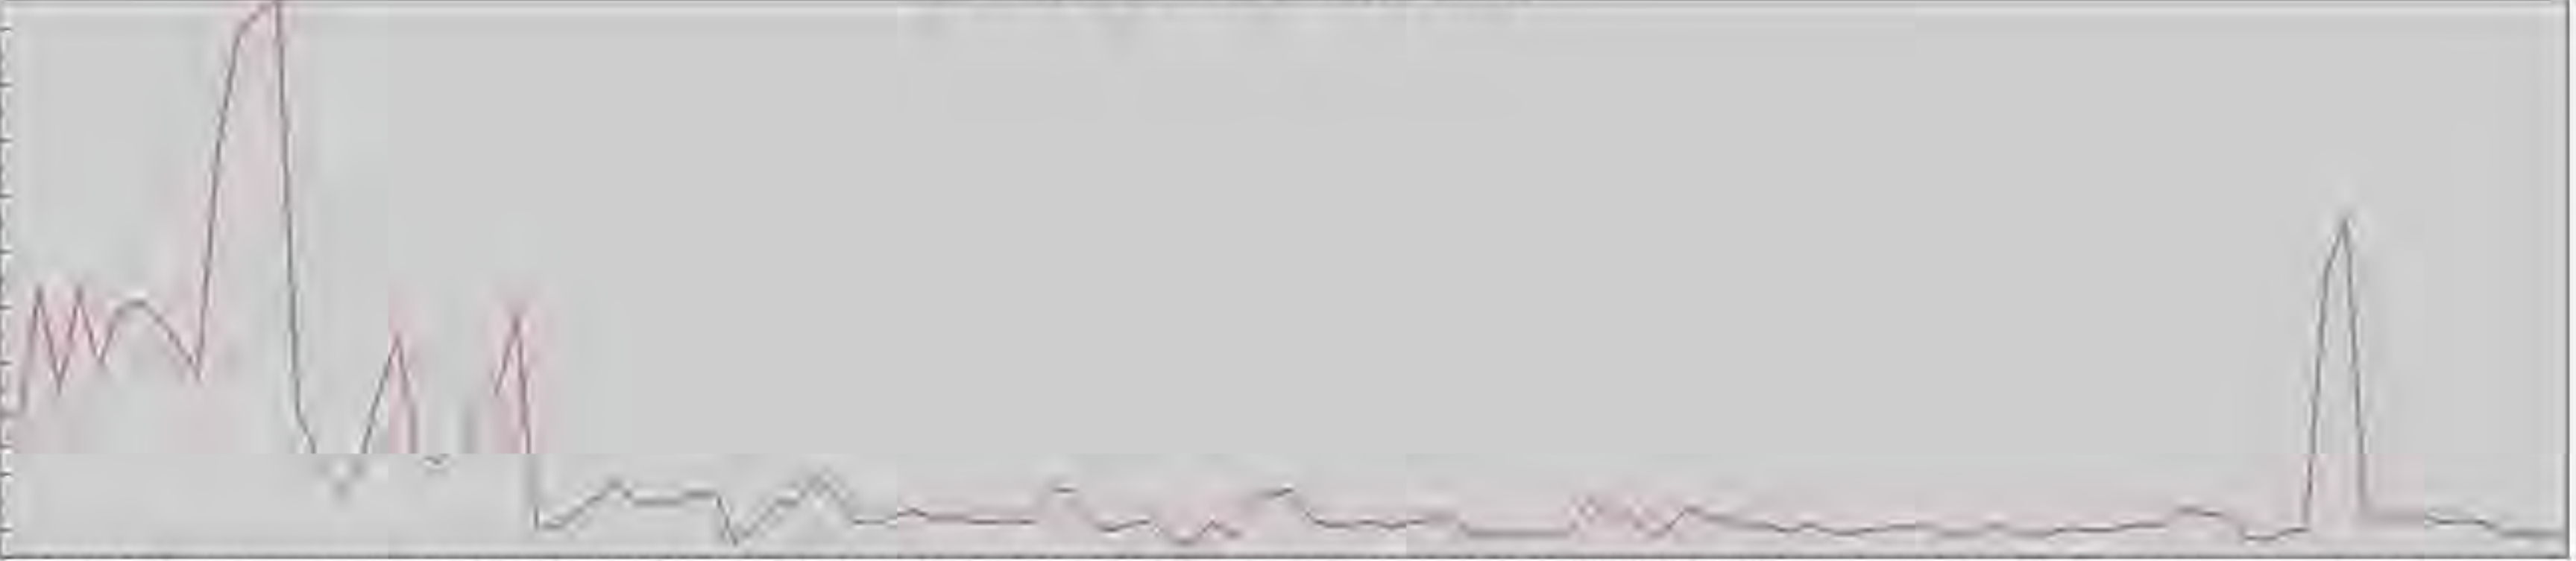

01-PP-M-cells\_GSM190789.CEL  
 02-PP-M-cells\_GSM190790.CEL  
 03-PP-M-cells\_GSM190791.CEL  
 04-CT-v-M-cells\_GSM190792.CEL  
 05-CT-v-M-cells\_GSM190793.CEL  
 06-CT-v-M-cells\_GSM190794.CEL  
 07-Ileum-IEC\_GSM190795.CEL  
 08-Ileum-IEC\_GSM190796.CEL  
 09-Ileum-IEC\_GSM190797.CEL  
 10-FAE-RMPYEP001001.CEL  
 11-FAE-RMPYEP002001.CEL  
 12-Small-intestine-epithelium\_RMINEP001001.CEL  
 13-Small-intestine-epithelium\_RMINEP002001.CEL  
 14-Ileum-IEC\_GSM350371.CEL  
 15-Ileum-IEC\_GSM350375.CEL  
 16-Colon-IEC-Gf\_GSM349880.CEL  
 17-Colon-VIII\_GSM480362.CEL  
 18-Colon-VIII\_GSM480363.CEL  
 19-Colon-VIII\_GSM480364.CEL  
 20-Colon-Crypt\_GSM480374.CEL  
 21-Colon-Crypt\_GSM480375.CEL  
 22-Paneth-cells\_GSM318590.CEL  
 23-Paneth-cells\_GSM318589.CEL  
 24-Paneth-cells\_GSM116359.CEL  
 25-Paneth-cells\_GSM116350.CEL  
 26-Paneth-cells-Gf-1\_GSM116357.CEL  
 27-Paneth-cells-Gf-1\_GSM116357.CEL  
 28-Bone marrow\_GSM258627.CEL  
 29-Bone marrow\_GSM116358.CEL  
 30-HSC\_GSM258770.CEL  
 31-HSC\_GSM258771.CEL  
 32-MEP\_GSM258772.CEL  
 33-MEP\_GSM258773.CEL  
 34-MEP\_GSM258774.CEL  
 35-MEP\_GSM258775.CEL  
 36-GMP\_GSM258665.CEL  
 37-GMP\_GSM258666.CEL  
 38-GMP\_GSM258667.CEL  
 39-Granulocytes\_GSM258668.CEL  
 40-Mast-cells\_GSM258771.CEL  
 41-Mast-cells\_GSM258772.CEL  
 42-Mast-cells-Gf\_GSM258773.CEL  
 43-Mast-cells-Gf+Ad\_GSM258774.CEL  
 44-Mast-cells-Gf+Ad\_GSM258775.CEL  
 45-Mast-cells-Gf+Ad\_GSM258776.CEL  
 46-NK-cells\_GSM258777.CEL  
 47-NK-cells\_GSM258778.CEL  
 48-CD8a+DC\_GSM258646.CEL  
 49-CD8a+DC\_GSM258647.CEL  
 50-CD8a-DC\_GSM258647.CEL  
 51-CD8a-DC\_GSM258647.CEL  
 52-Plasmacytoid-DC\_GSM258649.CEL  
 53-Plasmacytoid-DC\_GSM258649.CEL  
 54-BMM-GSM258694.CEL  
 55-BMM-GSM258694.CEL  
 56-BMM-LPS-6h\_GSM258699.CEL  
 57-BMM-LPS-6h\_GSM258699.CEL  
 58-PP-7h\_GSM268700.CEL  
 59-PP-7h\_GSM268700.CEL  
 60-PP-7h\_GSM268705.CEL  
 61-PP-7h\_GSM268705.CEL  
 62-Microglia\_GSM258721.CEL  
 63-Microglia\_GSM258721.CEL  
 64-Osteoclasts\_GSM258743.CEL  
 65-Osteoclasts\_GSM258743.CEL  
 66-Thymocyte-DN\_GSM465595.CEL  
 67-T-cells-CD4+\_GSM258773.CEL  
 68-T-cells-CD4+\_GSM258773.CEL  
 69-T-cells-CD8+\_GSM258774.CEL  
 70-T-cells-CD8+\_GSM258774.CEL  
 71-Tregs\_GSM258778.CEL  
 72-Tregs\_GSM258778.CEL  
 73-BAF3\_GSM258620.CEL  
 74-BAF3\_GSM258620.CEL  
 75-MZ-Bcell\_GSM258621.CEL  
 76-MZ-Bcell\_GSM258621.CEL  
 77-Follicular-Bcells\_GSM258664.CEL  
 78-Follicular-Bcells\_GSM258664.CEL  
 79-F-LY-RMLNDC002001.CEL  
 80-F-LY-RMLNDC003001.CEL  
 81-PP-FDC\_GSM481976.CEL  
 82-PP-FDC\_GSM481976.CEL  
 83-PP-FDC\_GSM481978.CEL  
 84-Lymph-endo-cells\_GSM143704.CEL  
 85-MS-1\_GSM234692.CEL  
 86-LTcell\_GSM465596.CEL  
 87-Nat Helper cell\_GSM465593.CEL  
 88-Nat Helper cell\_GSM465594.CEL  
 89-Chondrocytes\_GSM266741.CEL  
 90-Chondrocytes\_GSM266741.CEL  
 91-Osteoblast-d5\_GSM258741.CEL  
 92-Osteoblast-d5\_GSM258742.CEL  
 93-Osteoblast-d14\_GSM258737.CEL  
 94-Osteoblast-d14\_GSM258738.CEL  
 95-Osteoblast-d21\_GSM258739.CEL  
 96-Osteoblast-d21\_GSM258739.CEL  
 97-10T12\_GSM258631.CEL  
 98-10T12\_GSM258631.CEL  
 99-3T3-L1\_GSM258609.CEL  
 100-3T3-L1\_GSM258610.CEL  
 101-NH3T3\_GSM258739.CEL  
 102-NH3T3\_GSM258739.CEL  
 103-C2C12\_GSM258629.CEL  
 104-C2C12\_GSM258630.CEL  
 105-Bruce4\_GSM258690.CEL  
 106-Bruce4\_GSM258690.CEL  
 107-MIMCD3\_GSM258723.CEL  
 108-MIMCD3\_GSM258723.CEL  
 109-mim6\_GSM258725.CEL  
 110-mim6\_GSM258726.CEL  
 111-Astrocytes\_GSM241898.CEL  
 112-Astrocytes\_GSM241898.CEL  
 113-Spleen\_GSM258767.CEL  
 114-Spleen\_GSM258767.CEL  
 115-Spleen\_GSM258768.CEL  
 116-Lymph-nodes\_GSM258691.CEL  
 117-Lymph-nodes\_GSM258691.CEL  
 118-Intestine-small\_GSM258677.CEL  
 119-Intestine-small\_GSM258677.CEL  
 120-Intestine-large\_GSM258675.CEL  
 121-Intestine-large\_GSM258675.CEL  
 122-Colon-d4\_GSM198101.CEL  
 123-Colon-d4\_GSM198101.CEL  
 124-Colon-d9\_GSM198103.CEL  
 125-Colon-d9\_GSM198103.CEL  
 126-Colon-d9\_GSM198104.CEL  
 127-NALT\_GSM289408.CEL  
 128-NALT\_GSM289409.CEL  
 129-NALT\_GSM289410.CEL  
 130-NALT\_GSM289411.CEL



Cluster0141\_High in min6 cells and NALT (13 nodes)

498.8  
472.0  
446.3  
420.1  
393.8  
367.0  
341.3  
315  
288.8  
262.5  
236.3  
210  
183.8  
157.5  
131.3  
106  
78.8  
52.5  
26.3  
0

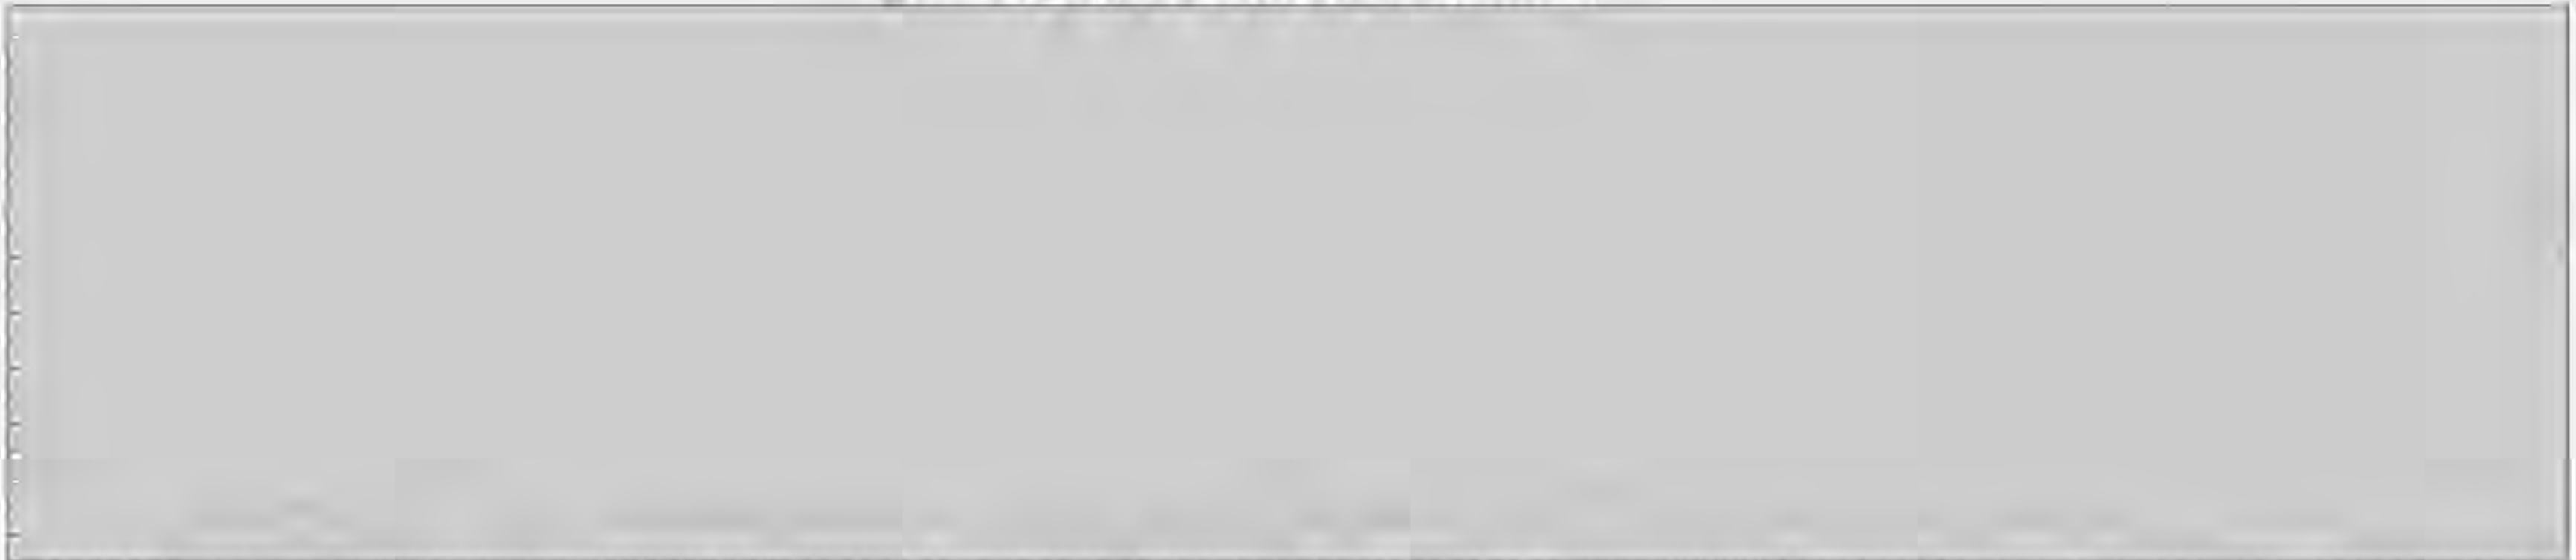

|     |                 |            |     |
|-----|-----------------|------------|-----|
| 30  | NALT            | GSM289411  | CEL |
| 31  | NALT            | GSM289410  | CEL |
| 32  | NALT            | GSM289409  | CEL |
| 33  | NALT            | GSM289408  | CEL |
| 34  | Colon-d9        | GSM1988104 | CEL |
| 35  | Colon-d9        | GSM1988103 | CEL |
| 36  | Colon-d4        | GSM1988102 | CEL |
| 37  | Colon-d4        | GSM1988101 | CEL |
| 38  | Colon-d4        | GSM1988100 | CEL |
| 39  | Colon-d4        | GSM1988099 | CEL |
| 40  | Intestine-large | GSM258676  | CEL |
| 41  | Intestine-large | GSM258675  | CEL |
| 42  | Intestine-small | GSM258678  | CEL |
| 43  | Intestine-small | GSM258677  | CEL |
| 44  | Lymph-nodes     | GSM258691  | CEL |
| 45  | Spleen          | GSM258707  | CEL |
| 46  | Spleen          | GSM258706  | CEL |
| 47  | Neuro2a         | GSM258728  | CEL |
| 48  | Neuro2a         | GSM258727  | CEL |
| 49  | Astrocytes      | GSM241898  | CEL |
| 50  | min6            | GSM258726  | CEL |
| 51  | min6            | GSM258725  | CEL |
| 52  | MIMCD3          | GSM258724  | CEL |
| 53  | MIMCD3          | GSM258723  | CEL |
| 54  | Bruc4           | GSM258690  | CEL |
| 55  | Bruc4           | GSM258689  | CEL |
| 56  | Bruc4           | GSM258688  | CEL |
| 57  | Bruc4           | GSM258687  | CEL |
| 58  | Bruc4           | GSM258686  | CEL |
| 59  | Bruc4           | GSM258685  | CEL |
| 60  | Bruc4           | GSM258684  | CEL |
| 61  | Bruc4           | GSM258683  | CEL |
| 62  | Bruc4           | GSM258682  | CEL |
| 63  | Bruc4           | GSM258681  | CEL |
| 64  | Bruc4           | GSM258680  | CEL |
| 65  | Bruc4           | GSM258679  | CEL |
| 66  | Bruc4           | GSM258678  | CEL |
| 67  | Bruc4           | GSM258677  | CEL |
| 68  | Bruc4           | GSM258676  | CEL |
| 69  | Bruc4           | GSM258675  | CEL |
| 70  | Bruc4           | GSM258674  | CEL |
| 71  | Bruc4           | GSM258673  | CEL |
| 72  | Bruc4           | GSM258672  | CEL |
| 73  | Bruc4           | GSM258671  | CEL |
| 74  | Bruc4           | GSM258670  | CEL |
| 75  | Bruc4           | GSM258669  | CEL |
| 76  | Bruc4           | GSM258668  | CEL |
| 77  | Bruc4           | GSM258667  | CEL |
| 78  | Bruc4           | GSM258666  | CEL |
| 79  | Bruc4           | GSM258665  | CEL |
| 80  | Bruc4           | GSM258664  | CEL |
| 81  | Bruc4           | GSM258663  | CEL |
| 82  | Bruc4           | GSM258662  | CEL |
| 83  | Bruc4           | GSM258661  | CEL |
| 84  | Bruc4           | GSM258660  | CEL |
| 85  | Bruc4           | GSM258659  | CEL |
| 86  | Bruc4           | GSM258658  | CEL |
| 87  | Bruc4           | GSM258657  | CEL |
| 88  | Bruc4           | GSM258656  | CEL |
| 89  | Bruc4           | GSM258655  | CEL |
| 90  | Bruc4           | GSM258654  | CEL |
| 91  | Bruc4           | GSM258653  | CEL |
| 92  | Bruc4           | GSM258652  | CEL |
| 93  | Bruc4           | GSM258651  | CEL |
| 94  | Bruc4           | GSM258650  | CEL |
| 95  | Bruc4           | GSM258649  | CEL |
| 96  | Bruc4           | GSM258648  | CEL |
| 97  | Bruc4           | GSM258647  | CEL |
| 98  | Bruc4           | GSM258646  | CEL |
| 99  | Bruc4           | GSM258645  | CEL |
| 100 | Bruc4           | GSM258644  | CEL |
| 101 | Bruc4           | GSM258643  | CEL |
| 102 | Bruc4           | GSM258642  | CEL |
| 103 | Bruc4           | GSM258641  | CEL |
| 104 | Bruc4           | GSM258640  | CEL |
| 105 | Bruc4           | GSM258639  | CEL |
| 106 | Bruc4           | GSM258638  | CEL |
| 107 | Bruc4           | GSM258637  | CEL |
| 108 | Bruc4           | GSM258636  | CEL |
| 109 | Bruc4           | GSM258635  | CEL |
| 110 | Bruc4           | GSM258634  | CEL |
| 111 | Bruc4           | GSM258633  | CEL |
| 112 | Bruc4           | GSM258632  | CEL |
| 113 | Bruc4           | GSM258631  | CEL |
| 114 | Bruc4           | GSM258630  | CEL |
| 115 | Bruc4           | GSM258629  | CEL |
| 116 | Bruc4           | GSM258628  | CEL |
| 117 | Bruc4           | GSM258627  | CEL |
| 118 | Bruc4           | GSM258626  | CEL |
| 119 | Bruc4           | GSM258625  | CEL |
| 120 | Bruc4           | GSM258624  | CEL |
| 121 | Bruc4           | GSM258623  | CEL |
| 122 | Bruc4           | GSM258622  | CEL |
| 123 | Bruc4           | GSM258621  | CEL |
| 124 | Bruc4           | GSM258620  | CEL |
| 125 | Bruc4           | GSM258619  | CEL |
| 126 | Bruc4           | GSM258618  | CEL |
| 127 | Bruc4           | GSM258617  | CEL |
| 128 | Bruc4           | GSM258616  | CEL |
| 129 | Bruc4           | GSM258615  | CEL |
| 130 | Bruc4           | GSM258614  | CEL |
| 131 | Bruc4           | GSM258613  | CEL |
| 132 | Bruc4           | GSM258612  | CEL |
| 133 | Bruc4           | GSM258611  | CEL |
| 134 | Bruc4           | GSM258610  | CEL |
| 135 | Bruc4           | GSM258609  | CEL |
| 136 | Bruc4           | GSM258608  | CEL |
| 137 | Bruc4           | GSM258607  | CEL |
| 138 | Bruc4           | GSM258606  | CEL |
| 139 | Bruc4           | GSM258605  | CEL |
| 140 | Bruc4           | GSM258604  | CEL |
| 141 | Bruc4           | GSM258603  | CEL |
| 142 | Bruc4           | GSM258602  | CEL |
| 143 | Bruc4           | GSM258601  | CEL |
| 144 | Bruc4           | GSM258600  | CEL |
| 145 | Bruc4           | GSM258599  | CEL |
| 146 | Bruc4           | GSM258598  | CEL |
| 147 | Bruc4           | GSM258597  | CEL |
| 148 | Bruc4           | GSM258596  | CEL |
| 149 | Bruc4           | GSM258595  | CEL |
| 150 | Bruc4           | GSM258594  | CEL |
| 151 | Bruc4           | GSM258593  | CEL |
| 152 | Bruc4           | GSM258592  | CEL |
| 153 | Bruc4           | GSM258591  | CEL |
| 154 | Bruc4           | GSM258590  | CEL |
| 155 | Bruc4           | GSM258589  | CEL |
| 156 | Bruc4           | GSM258588  | CEL |
| 157 | Bruc4           | GSM258587  | CEL |
| 158 | Bruc4           | GSM258586  | CEL |
| 159 | Bruc4           | GSM258585  | CEL |
| 160 | Bruc4           | GSM258584  | CEL |
| 161 | Bruc4           | GSM258583  | CEL |
| 162 | Bruc4           | GSM258582  | CEL |
| 163 | Bruc4           | GSM258581  | CEL |
| 164 | Bruc4           | GSM258580  | CEL |
| 165 | Bruc4           | GSM258579  | CEL |
| 166 | Bruc4           | GSM258578  | CEL |
| 167 | Bruc4           | GSM258577  | CEL |
| 168 | Bruc4           | GSM258576  | CEL |
| 169 | Bruc4           | GSM258575  | CEL |
| 170 | Bruc4           | GSM258574  | CEL |
| 171 | Bruc4           | GSM258573  | CEL |
| 172 | Bruc4           | GSM258572  | CEL |
| 173 | Bruc4           | GSM258571  | CEL |
| 174 | Bruc4           | GSM258570  | CEL |
| 175 | Bruc4           | GSM258569  | CEL |
| 176 | Bruc4           | GSM258568  | CEL |
| 177 | Bruc4           | GSM258567  | CEL |
| 178 | Bruc4           | GSM258566  | CEL |
| 179 | Bruc4           | GSM258565  | CEL |
| 180 | Bruc4           | GSM258564  | CEL |
| 181 | Bruc4           | GSM258563  | CEL |
| 182 | Bruc4           | GSM258562  | CEL |
| 183 | Bruc4           | GSM258561  | CEL |
| 184 | Bruc4           | GSM258560  | CEL |
| 185 | Bruc4           | GSM258559  | CEL |
| 186 | Bruc4           | GSM258558  | CEL |
| 187 | Bruc4           | GSM258557  | CEL |
| 188 | Bruc4           | GSM258556  | CEL |
| 189 | Bruc4           | GSM258555  | CEL |
| 190 | Bruc4           | GSM258554  | CEL |
| 191 | Bruc4           | GSM258553  | CEL |
| 192 | Bruc4           | GSM258552  | CEL |
| 193 | Bruc4           | GSM258551  | CEL |
| 194 | Bruc4           | GSM258550  | CEL |
| 195 | Bruc4           | GSM258549  | CEL |
| 196 | Bruc4           | GSM258548  | CEL |
| 197 | Bruc4           | GSM258547  | CEL |
| 198 | Bruc4           | GSM258546  | CEL |
| 199 | Bruc4           | GSM258545  | CEL |
| 200 | Bruc4           | GSM258544  | CEL |
| 201 | Bruc4           | GSM258543  | CEL |
| 202 | Bruc4           | GSM258542  | CEL |
| 203 | Bruc4           | GSM258541  | CEL |
| 204 | Bruc4           | GSM258540  | CEL |
| 205 | Bruc4           | GSM258539  | CEL |
| 206 | Bruc4           | GSM258538  | CEL |
| 207 | Bruc4           | GSM258537  | CEL |
| 208 | Bruc4           | GSM258536  | CEL |
| 209 | Bruc4           | GSM258535  | CEL |
| 210 | Bruc4           | GSM258534  | CEL |
| 211 | Bruc4           | GSM258533  | CEL |
| 212 | Bruc4           | GSM258532  | CEL |
| 213 | Bruc4           | GSM258531  | CEL |
| 214 | Bruc4           | GSM258530  | CEL |
| 215 | Bruc4           | GSM258529  | CEL |
| 216 | Bruc4           | GSM258528  | CEL |
| 217 | Bruc4           | GSM258527  | CEL |
| 218 | Bruc4           | GSM258526  | CEL |
| 219 | Bruc4           | GSM258525  | CEL |
| 220 | Bruc4           | GSM258524  | CEL |
| 221 | Bruc4           | GSM258523  | CEL |
| 222 | Bruc4           | GSM258522  | CEL |
| 223 | Bruc4           | GSM258521  | CEL |
| 224 | Bruc4           | GSM258520  | CEL |
| 225 | Bruc4           | GSM258519  | CEL |
| 226 | Bruc4           | GSM258518  | CEL |
| 227 | Bruc4           | GSM258517  | CEL |
| 228 | Bruc4           | GSM258516  | CEL |
| 229 | Bruc4           | GSM258515  | CEL |
| 230 | Bruc4           | GSM258514  | CEL |
| 231 | Bruc4           | GSM258513  | CEL |
| 232 | Bruc4           | GSM258512  | CEL |
| 233 | Bruc4           | GSM258511  | CEL |
| 234 | Bruc4           | GSM258510  | CEL |
| 235 | Bruc4           | GSM258509  | CEL |
| 236 | Bruc4           | GSM258508  | CEL |
| 237 | Bruc4           | GSM258507  | CEL |
| 238 | Bruc4           | GSM258506  | CEL |
| 239 | Bruc4           | GSM258505  | CEL |
| 240 | Bruc4           | GSM258504  | CEL |
| 241 | Bruc4           | GSM258503  | CEL |
| 242 | Bruc4           | GSM258502  | CEL |
| 243 | Bruc4           | GSM258501  | CEL |
| 244 | Bruc4           | GSM258500  | CEL |
| 245 | Bruc4           | GSM258499  | CEL |
| 246 | Bruc4           | GSM258498  | CEL |
| 247 | Bruc4           | GSM258497  | CEL |
| 248 | Bruc4           | GSM258496  | CEL |
| 249 | Bruc4           | GSM258495  | CEL |
| 250 | Bruc4           | GSM258494  | CEL |
| 251 | Bruc4           | GSM258493  | CEL |
| 252 | Bruc4           | GSM258492  | CEL |
| 253 | Bruc4           | GSM258491  | CEL |
| 254 | Bruc4           | GSM258490  | CEL |
| 255 | Bruc4           | GSM258489  | CEL |
| 256 | Bruc4           | GSM258488  | CEL |
| 257 | Bruc4           | GSM258487  | CEL |
| 258 | Bruc4           | GSM258486  | CEL |
| 259 | Bruc4           | GSM258485  | CEL |
| 260 | Bruc4           | GSM258484  | CEL |
| 261 | Bruc4           | GSM258483  | CEL |
| 262 | Bruc4           | GSM258482  | CEL |
| 263 | Bruc4           | GSM258481  | CEL |
| 264 | Bruc4           | GSM258480  | CEL |
| 265 | Bruc4           | GSM258479  | CEL |
| 266 | Bruc4           | GSM258478  | CEL |
| 267 | Bruc4           | GSM258477  | CEL |
| 268 | Bruc4           | GSM258476  | CEL |
| 269 | Bruc4           | GSM258475  | CEL |
| 270 | Bruc4           | GSM258474  | CEL |
| 271 | Bruc4           | GSM258473  | CEL |
| 272 | Bruc4           | GSM258472  | CEL |
| 273 | Bruc4           | GSM258471  | CEL |
| 274 | Bruc4           | GSM258470  | CEL |
| 275 | Bruc4           | GSM258469  | CEL |
| 276 | Bruc4           | GSM258468  | CEL |
| 277 | Bruc4           | GSM258467  | CEL |
| 278 | Bruc4           | GSM258466  | CEL |
| 279 | Bruc4           | GSM258465  | CEL |
| 280 | Bruc4           | GSM258464  | CEL |
| 281 | Bruc4           | GSM258463  | CEL |
| 282 | Bruc4           | GSM258462  | CEL |
| 283 | Bruc4           | GSM258461  | CEL |
| 284 | Bruc4           | GSM258460  | CEL |
| 285 | Bruc4           | GSM258459  | CEL |
| 286 | Bruc4           | GSM258458  | CEL |
| 287 | Bruc4           | GSM258457  | CEL |
| 288 | Bruc4           | GSM258456  | CEL |
| 289 | Bruc4           | GSM258455  | CEL |
| 290 | Bruc4           | GSM258454  | CEL |
| 291 | Bruc4           | GSM258453  | CEL |
| 292 | Bruc4           | GSM258452  | CEL |
| 293 | Bruc4           | GSM258451  | CEL |
| 294 | Bruc4           | GSM258450  | CEL |
| 295 | Bruc4           | GSM258449  | CEL |
| 296 | Bruc4           | GSM258448  | CEL |
| 297 | Bruc4           | GSM258447  | CEL |
| 298 | Bruc4           | GSM258446  | CEL |
| 299 | Bruc4           | GSM258445  | CEL |
| 300 | Bruc4           | GSM258444  | CEL |
| 301 | Bruc4           | GSM258443  | CEL |
| 302 | Bruc4           | GSM258442  | CEL |
| 303 | Bruc4           | GSM258441  | CEL |
| 304 | Bruc4           | GSM258440  | CEL |
| 305 | Bruc4           | GSM258439  | CEL |
| 306 | Bruc4           | GSM258438  | CEL |
| 307 | Bruc4           | GSM258437  | CEL |
| 308 | Bruc4           | GSM258436  | CEL |
| 309 | Bruc4           | GSM258435  | CEL |
| 310 | Bruc4           | GSM258434  | CEL |
| 311 | Bruc4           | GSM258433  | CEL |
| 312 | Bruc4           | GSM258432  | CEL |
| 313 | Bruc4           | GSM258431  | CEL |
| 314 | Bruc4           | GSM258430  | CEL |
| 315 | Bruc4           | GSM258429  | CEL |
| 316 | Bruc4           | GSM258428  | CEL |
| 317 | Bruc4           | GSM258427  | CEL |
| 318 | Bruc4           | GSM258426  | CEL |
| 319 | Bruc4           | GSM258425  | CEL |
| 320 | Bruc4           | GSM258424  | CEL |
| 321 | Bruc4           | GSM258423  | CEL |
| 322 | Bruc4           | GSM258422  | CEL |
| 323 | Bruc4           | GSM258421  | CEL |
| 324 | Bruc4           | GSM258420  | CEL |
| 325 | Bruc4           | GSM258419  | CEL |
| 326 | Bruc4           | GSM258418  | CEL |
| 327 | Bruc4           | GSM258417  | CEL |
| 328 | Bruc4           | GSM258416  | CEL |
| 329 | Bruc4           | GSM258415  | CEL |
| 330 | Bruc4           | GSM258414  | CEL |
| 331 | Bruc4           | GSM258413  | CEL |
| 332 | Bruc4           | GSM258412  | CEL |
| 333 | Bruc4           | GSM258411  | CEL |
| 334 | Bruc4           | GSM258410  | CEL |
| 335 | Bruc4           | GSM258409  | CEL |
| 336 | Bruc4           | GSM258408  | CEL |
| 337 | Bruc4           | GSM258407  | CEL |
| 338 | Bruc4           | GSM258406  | CEL |
| 339 | Bruc4           | GSM258405  | CEL |
| 340 | Bruc4           | GSM258404  | CEL |
| 341 | Bruc4           |            |     |



Cluster0142\_Low in many (13 nodes)

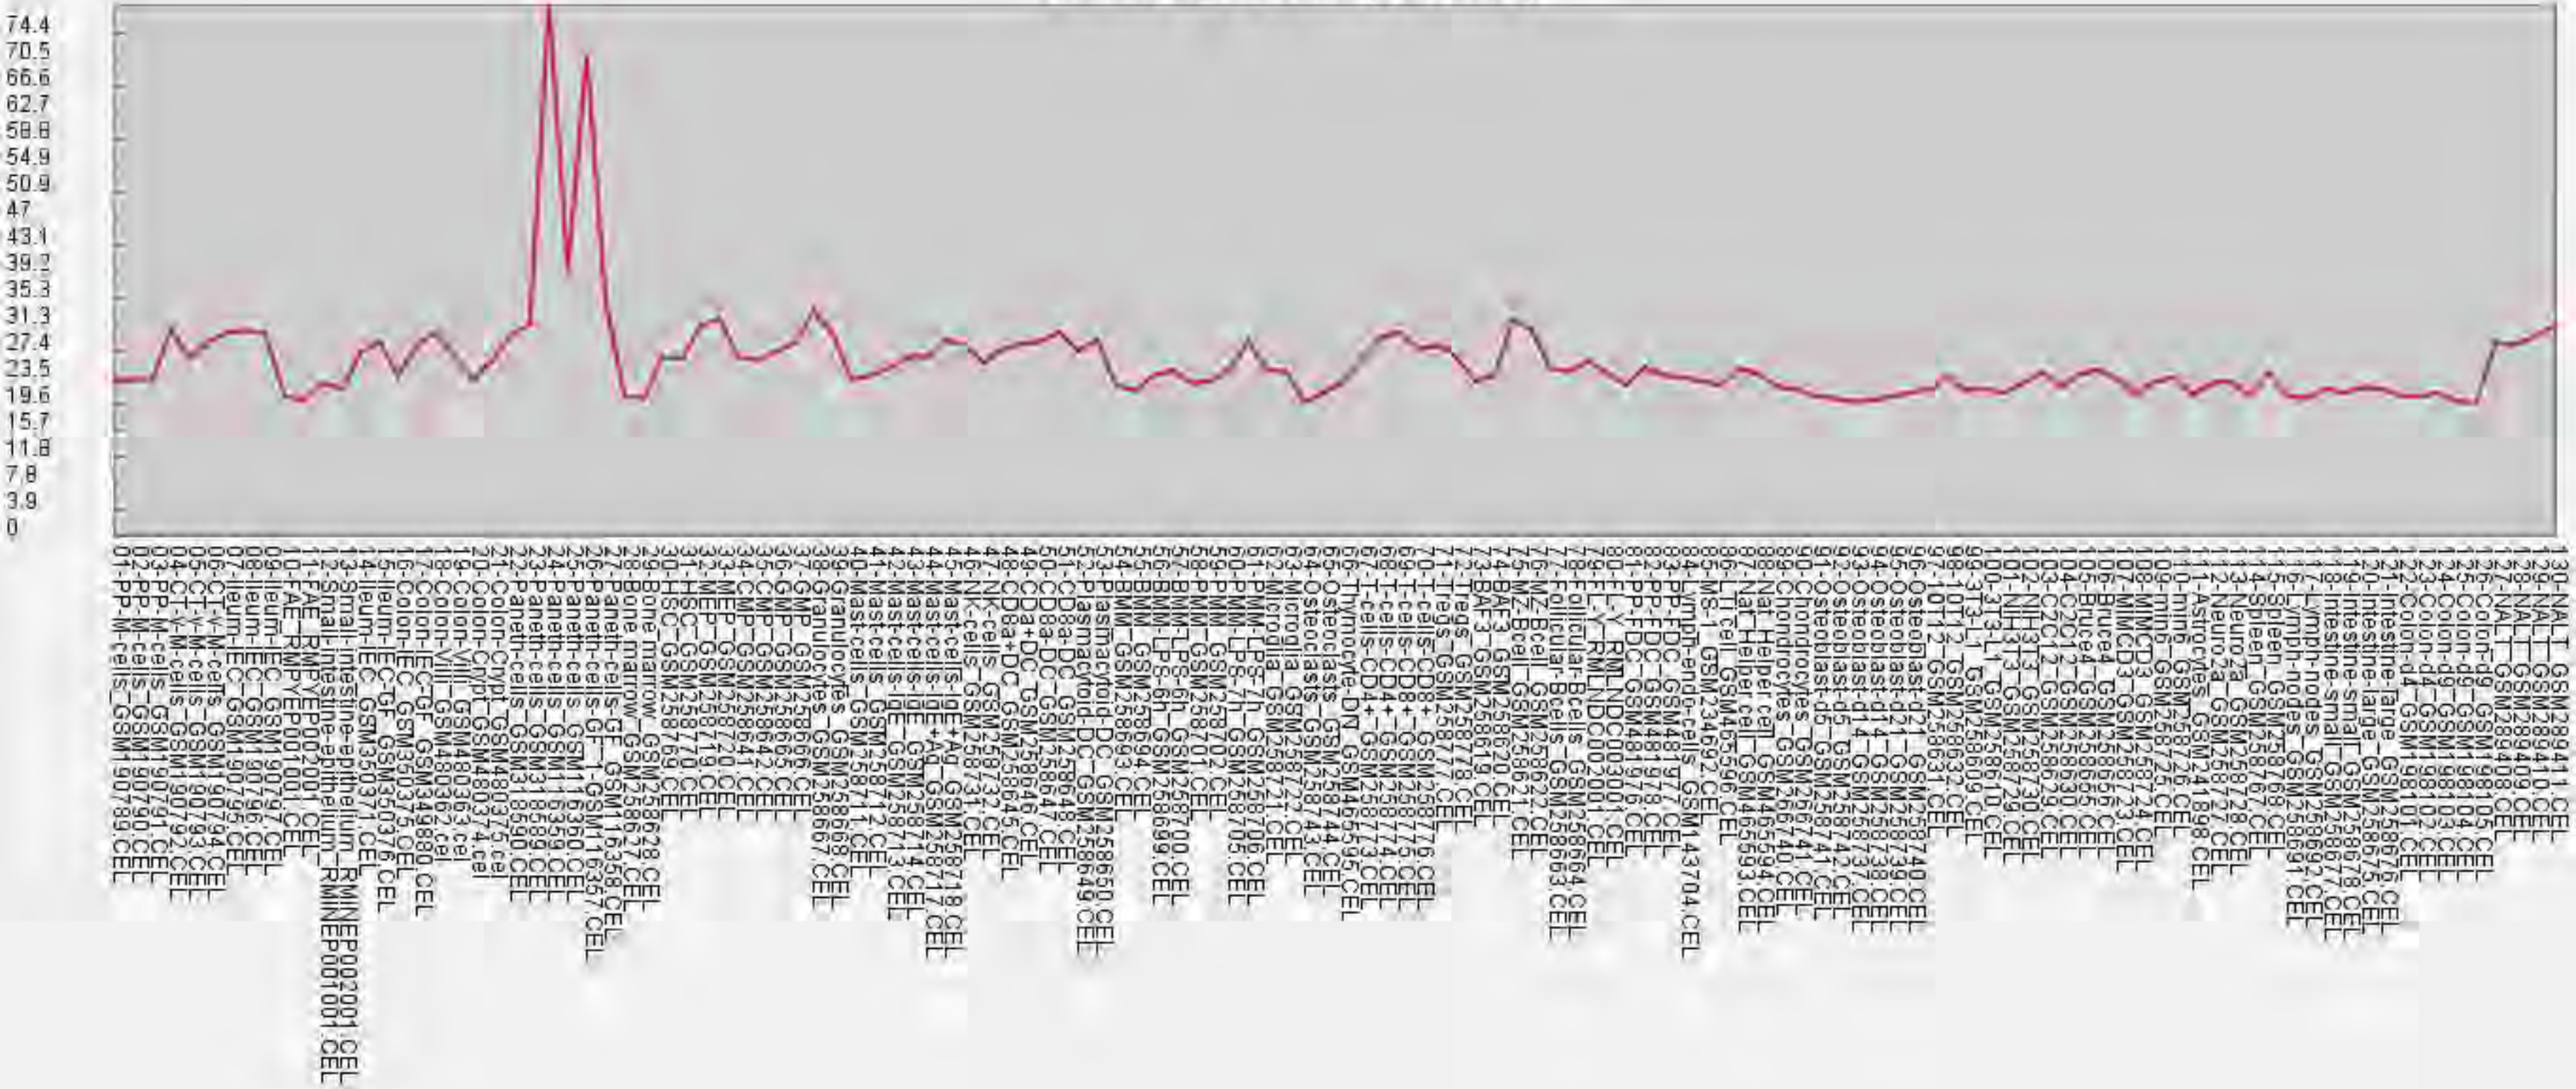



Cluster0143\_High in T cells and B cells (13 nodes)

211.8  
200.6  
189.5  
178.4  
167.2  
156.1  
144.9  
133.8  
122.6  
111.5  
100.3  
89.2  
78  
66.9  
55.7  
44.6  
33.4  
22.3  
11.1  
0

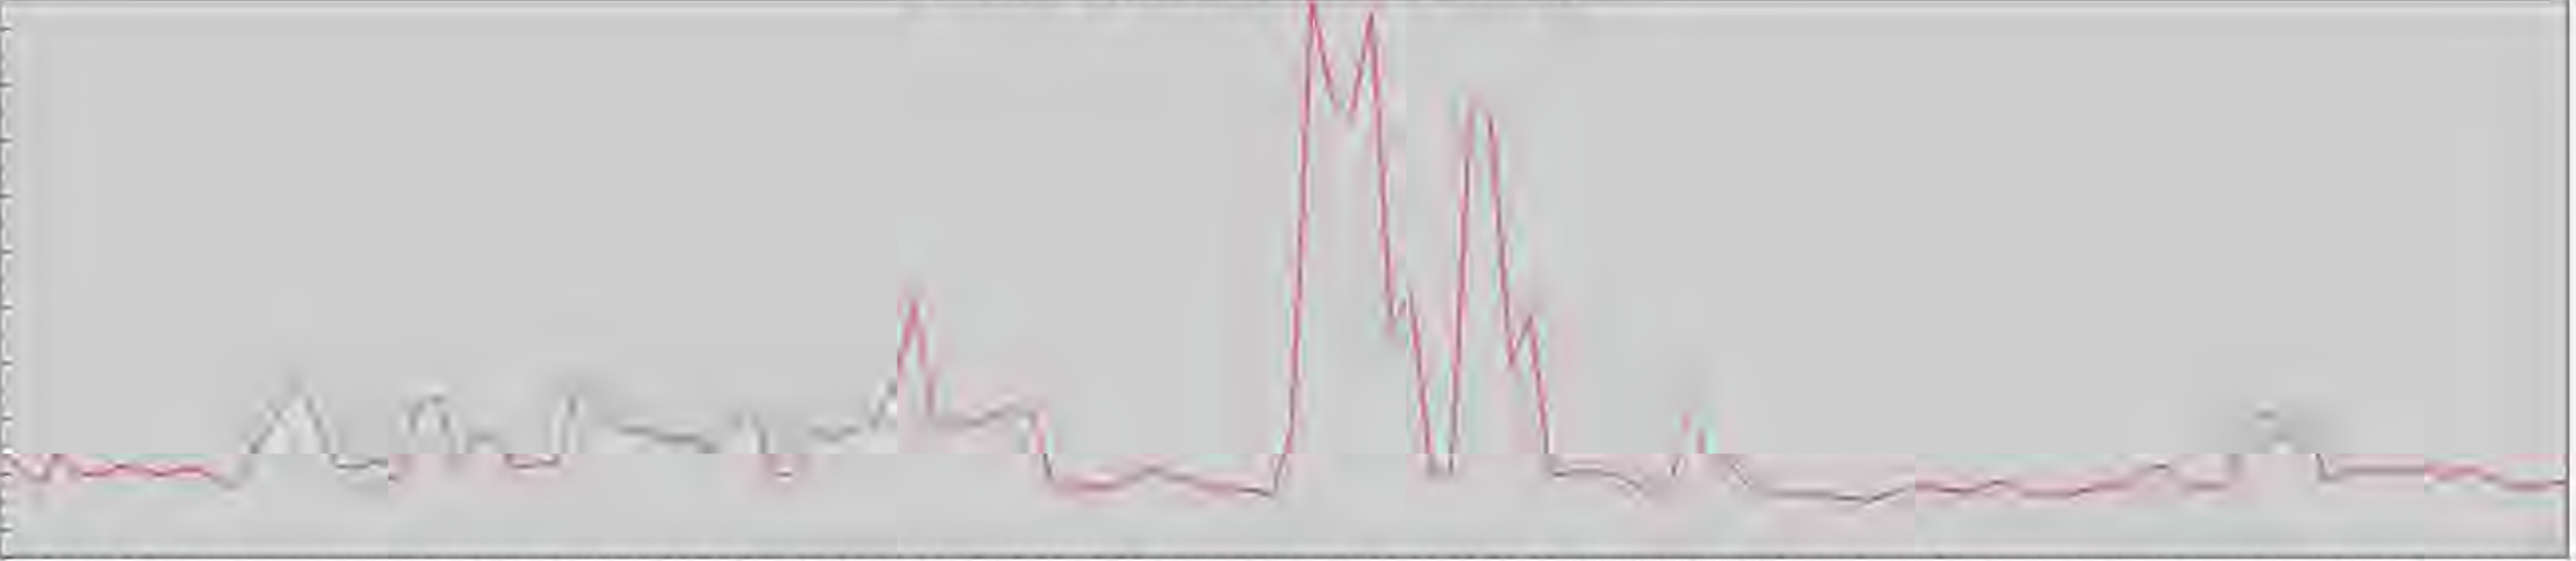

130-NALT GSM289411.CEL  
129-NALT GSM289410.CEL  
128-NALT GSM289409.CEL  
127-NALT GSM289408.CEL  
126-Colon-d9 GSM1988105.CEL  
125-Colon-d9 GSM1988104.CEL  
124-Colon-d9 GSM1988103.CEL  
123-Colon-d4 GSM1988102.CEL  
122-Colon-d4 GSM1988101.CEL  
121-Intestine-large GSM258676.CEL  
120-Intestine-large GSM258675.CEL  
119-Intestine-small GSM258678.CEL  
118-Intestine-small GSM258692.CEL  
117-Lymph-nodes GSM258691.CEL  
116-Lymph-nodes GSM258726.CEL  
115-Spleen GSM258767.CEL  
114-Spleen GSM258767.CEL  
113-Neuro2a GSM258728.CEL  
112-Neuro2a GSM258727.CEL  
111-Astrocytes GSM241898.CEL  
110-mim6 GSM258726.CEL  
109-mim6 GSM258725.CEL  
108-MIMCD3 GSM258724.CEL  
107-MIMCD3 GSM258723.CEL  
106-Bruce4 GSM258656.CEL  
105-Bruce4 GSM258656.CEL  
104-C2C12 GSM258690.CEL  
103-C2C12 GSM258629.CEL  
102-NH3T3 GSM258730.CEL  
101-NH3T3 GSM258729.CEL  
100-3T3-L1 GSM258610.CEL  
99-3T3-L1 GSM258609.CEL  
98-10T12 GSM258632.CEL  
97-10T12 GSM258631.CEL  
96-Osteoblast-d21 GSM258740.CEL  
95-Osteoblast-d21 GSM258739.CEL  
94-Osteoblast-d14 GSM258738.CEL  
93-Osteoblast-d14 GSM258737.CEL  
92-Osteoblast-d5 GSM258742.CEL  
91-Osteoblast-d5 GSM258741.CEL  
90-Chondrocytes GSM266741.CEL  
89-Chondrocytes GSM266740.CEL  
88-Nat Helper cell GSM465594.CEL  
87-Nat Helper cell GSM465593.CEL  
86-TT cell GSM465596.CEL  
85-MS-1 GSM234692.CEL  
84-Lymph-endo-cells GSM143704.CEL  
83-PP-FDC GSM481977.CEL  
82-PP-FDC GSM481978.CEL  
81-PP-FDC GSM481976.CEL  
80-F-LY RMLNDCC003001.CEL  
79-F-LY RMLNDCC003001.CEL  
78-Follicular-Bcells GSM258664.CEL  
77-Follicular-Bcells GSM258663.CEL  
76-MZ-Bcell GSM258627.CEL  
75-MZ-Bcell GSM258627.CEL  
74-BAF3 GSM258620.CEL  
73-BAF3 GSM258619.CEL  
72-Tregs GSM258778.CEL  
71-Tregs GSM258777.CEL  
70-T-cells-CD8+ GSM258776.CEL  
69-T-cells-CD8+ GSM258774.CEL  
68-T-cells-CD4+ GSM258773.CEL  
67-T-cells-CD4+ GSM258744.CEL  
66-Thymocyte-DN GSM465595.CEL  
65-Osteoclasts GSM258743.CEL  
64-Microglia GSM258721.CEL  
63-Microglia GSM258721.CEL  
62-MM-LPS-7h GSM268706.CEL  
61-MM-LPS-7h GSM268705.CEL  
60-MM-LPS-6h GSM258702.CEL  
59-MM-LPS-6h GSM258701.CEL  
58-MM-LPS-6h GSM258699.CEL  
57-MM-LPS-6h GSM258699.CEL  
56-MM-LPS-6h GSM258694.CEL  
55-Plasmacytoid-DC GSM258650.CEL  
54-Plasmacytoid-DC GSM258649.CEL  
53-CD8a-DC GSM258647.CEL  
52-CD8a-DC GSM258647.CEL  
51-CD8a+DC GSM258646.CEL  
50-CD8a+DC GSM258646.CEL  
49-NK-cells GSM258732.CEL  
48-NK-cells GSM258731.CEL  
47-NK-cells GSM258731.CEL  
46-Mast-cells-IgE+Ad GSM258718.CEL  
45-Mast-cells-IgE+Ad GSM258717.CEL  
44-Mast-cells-IgE GSM258714.CEL  
43-Mast-cells-IgE GSM258713.CEL  
42-Mast-cells GSM258712.CEL  
41-Mast-cells GSM258711.CEL  
40-Granulocytes GSM258668.CEL  
39-Granulocytes GSM258667.CEL  
38-GMP GSM258666.CEL  
37-GMP GSM258666.CEL  
36-GMP GSM258665.CEL  
35-GMP GSM258642.CEL  
34-MEP GSM258854.CEL  
33-MEP GSM258720.CEL  
32-MEP GSM258719.CEL  
31-HESC GSM258770.CEL  
30-HESC GSM258769.CEL  
29-Bone marrow GSM258628.CEL  
28-Bone marrow GSM258627.CEL  
27-paneth-cells-GE GSM116357.CEL  
26-paneth-cells-GE GSM116350.CEL  
25-paneth-cells GSM116359.CEL  
24-paneth-cells GSM116359.CEL  
23-paneth-cells GSM318589.CEL  
22-paneth-cells GSM318590.CEL  
21-paneth-cells GSM480375.CEL  
20-paneth-cells GSM480374.CEL  
19-paneth-cells GSM480363.CEL  
18-paneth-cells GSM480362.CEL  
17-paneth-cells GSM349880.CEL  
16-paneth-cells GSM350375.CEL  
15-paneth-cells GSM350376.CEL  
14-paneth-cells GSM350371.CEL  
13-paneth-cells GSM350371.CEL  
13-paneth-cells GSM350371.CEL  
12-paneth-cells GSM350371.CEL  
12-paneth-cells GSM350371.CEL  
11-paneth-cells GSM350371.CEL  
11-paneth-cells GSM350371.CEL  
10-paneth-cells GSM350371.CEL  
10-paneth-cells GSM350371.CEL  
9-paneth-cells GSM350371.CEL  
9-paneth-cells GSM350371.CEL  
8-paneth-cells GSM350371.CEL  
8-paneth-cells GSM350371.CEL  
7-paneth-cells GSM350371.CEL  
7-paneth-cells GSM350371.CEL  
6-paneth-cells GSM350371.CEL  
6-paneth-cells GSM350371.CEL  
5-paneth-cells GSM350371.CEL  
5-paneth-cells GSM350371.CEL  
4-paneth-cells GSM350371.CEL  
4-paneth-cells GSM350371.CEL  
3-paneth-cells GSM350371.CEL  
3-paneth-cells GSM350371.CEL  
2-paneth-cells GSM350371.CEL  
2-paneth-cells GSM350371.CEL  
1-paneth-cells GSM350371.CEL  
1-paneth-cells GSM350371.CEL



Cluster0144\_MHC calss II (13 nodes)

9,365.4  
8,872.5  
8,379.6  
7,886.6  
7,393.7  
6,900.8  
6,407.9  
5,915  
5,422.1  
4,929.1  
4,436.2  
3,943.3  
3,450.4  
2,957.5  
2,464.6  
1,971.7  
1,478.7  
985.8  
492.9  
0

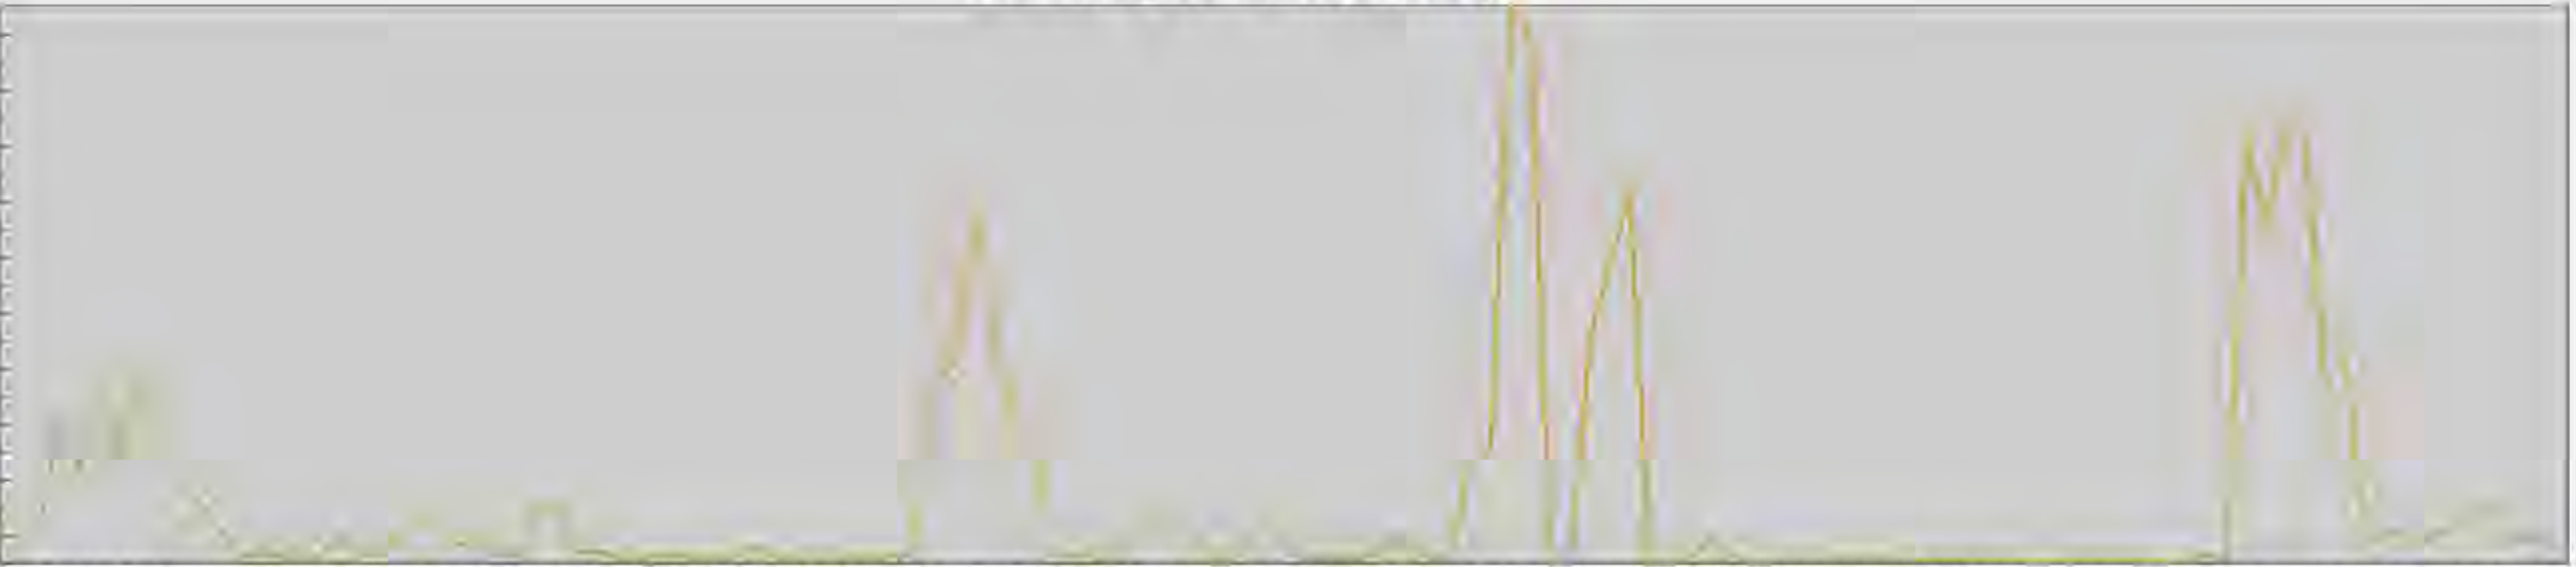

130-NALT GSM289411.CEL  
129-NALT GSM289410.CEL  
128-NALT GSM289409.CEL  
127-NALT GSM289408.CEL  
126-Colon-d9 GSM1988105.CEL  
125-Colon-d9 GSM1988104.CEL  
124-Colon-d9 GSM1988103.CEL  
123-Colon-d4 GSM1988102.CEL  
122-Colon-d4 GSM1988101.CEL  
121-Intestine-large GSM258676.CEL  
120-Intestine-large GSM258675.CEL  
119-Intestine-small GSM258678.CEL  
118-Intestine-small GSM258677.CEL  
117-Lymph-nodes GSM258691.CEL  
116-Lymph-nodes GSM258726.CEL  
115-Spleen GSM258768.CEL  
114-Spleen GSM258767.CEL  
113-Neuro2a GSM258728.CEL  
112-Neuro2a GSM258727.CEL  
111-Astrocytes GSM241898.CEL  
110-mim6 GSM258726.CEL  
109-mim6 GSM258725.CEL  
108-MIMCD3 GSM258724.CEL  
107-MIMCD3 GSM258723.CEL  
106-Bruce4 GSM258656.CEL  
105-Bruce4 GSM258655.CEL  
104-C2C12 GSM258690.CEL  
103-C2C12 GSM258689.CEL  
102-NH3T3 GSM258739.CEL  
101-NH3T3 GSM258738.CEL  
100-3T3-L1 GSM258610.CEL  
99-3T3-L1 GSM258609.CEL  
98-10T12 GSM258632.CEL  
97-10T12 GSM258631.CEL  
96-Osteoblast-d21 GSM258740.CEL  
95-Osteoblast-d21 GSM258739.CEL  
94-Osteoblast-d14 GSM258738.CEL  
93-Osteoblast-d14 GSM258737.CEL  
92-Osteoblast-d5 GSM258742.CEL  
91-Osteoblast-d5 GSM258741.CEL  
90-Chondrocytes GSM266741.CEL  
89-Chondrocytes GSM266740.CEL  
88-Nat Helper cell GSM465594.CEL  
87-Nat Helper cell GSM465593.CEL  
86-TT cell GSM465596.CEL  
85-MS-1 GSM234692.CEL  
84-Lymph-endc-cells GSM143704.CEL  
83-PP-FDC GSM481977.CEL  
82-PP-FDC GSM481978.CEL  
81-PP-FDC GSM481976.CEL  
80-F-LY RMLNDC003001.CEL  
79-F-LY RMLNDC003001.CEL  
78-Follicular-Bcells GSM258664.CEL  
77-Follicular-Bcells GSM258663.CEL  
76-MZ-Bcell GSM258622.CEL  
75-MZ-Bcell GSM258621.CEL  
74-BAF3 GSM258620.CEL  
73-BAF3 GSM258619.CEL  
72-Tregs GSM258778.CEL  
71-Tregs GSM258777.CEL  
70-T-cells-CD8+ GSM258776.CEL  
69-T-cells-CD8+ GSM258775.CEL  
68-T-cells-CD4+ GSM258774.CEL  
67-T-cells-CD4+ GSM258773.CEL  
66-Thymocyte-DN GSM465595.CEL  
65-Osteoclasts GSM258743.CEL  
64-Microglia GSM258721.CEL  
63-Microglia GSM258721.CEL  
62-MM-PS-7h GSM258706.CEL  
61-MM-PS-7h GSM258705.CEL  
60-MM-PS-6h GSM258702.CEL  
59-MM-PS-6h GSM258701.CEL  
58-MM-LPS-6h GSM258699.CEL  
57-MM-LPS-6h GSM258699.CEL  
56-MM-LPS-6h GSM258699.CEL  
55-MM-LPS-6h GSM258699.CEL  
54-MM-LPS-6h GSM258699.CEL  
53-Plasmacytoid-DC GSM258650.CEL  
52-Plasmacytoid-DC GSM258649.CEL  
51-CD8a-DC GSM258648.CEL  
50-CD8a-DC GSM258647.CEL  
49-CD8a+DC GSM258646.CEL  
48-CD8a+DC GSM258645.CEL  
47-NK-cells GSM258732.CEL  
46-NK-cells GSM258731.CEL  
45-Mast-cells-IgE+Ad GSM258718.CEL  
44-Mast-cells-IgE+Ad GSM258717.CEL  
43-Mast-cells-IgE GSM258714.CEL  
42-Mast-cells-IgE GSM258713.CEL  
41-Mast-cells GSM258712.CEL  
40-Granulocytes GSM258668.CEL  
39-Granulocytes GSM258667.CEL  
38-GMP GSM258666.CEL  
37-GMP GSM258665.CEL  
36-GMP GSM258664.CEL  
35-CMP GSM258642.CEL  
34-CMP GSM258641.CEL  
33-MEP GSM258720.CEL  
32-MEP GSM258719.CEL  
31-HSC GSM258770.CEL  
30-HSC GSM258769.CEL  
29-Bone marrow GSM258628.CEL  
28-Bone marrow GSM258627.CEL  
27-Paneth-cells-GF-1 GSM116357.CEL  
26-Paneth-cells-GF-1 GSM116350.CEL  
25-Paneth-cells GSM116359.CEL  
24-Paneth-cells GSM116359.CEL  
23-Paneth-cells GSM318589.CEL  
22-Paneth-cells GSM318590.CEL  
21-Colon-Crypt GSM480375.CEL  
20-Colon-Crypt GSM480374.CEL  
19-Colon-Vill GSM480363.CEL  
18-Colon-Vill GSM480362.CEL  
17-Colon-IEC-GF GSM349880.CEL  
16-Colon-IEC-GF GSM350375.CEL  
15-Ileum-IEC-GF GSM350376.CEL  
14-Ileum-IEC GSM350371.CEL  
13-Small-intestine-epithelium RMINEP002001.CEL  
12-Small-intestine-epithelium RMINEP001001.CEL  
11-FAE-RMPYEP002001.CEL  
10-FAE-RMPYEP001001.CEL  
09-Ileum-IEC GSM190797.CEL  
08-Ileum-IEC GSM190796.CEL  
07-Ileum-IEC GSM190795.CEL  
06-CT-v-M-cells GSM190794.CEL  
05-CT-v-M-cells GSM190793.CEL  
04-CT-v-M-cells GSM190792.CEL  
03-PP-M-cells GSM190791.CEL  
02-PP-M-cells GSM190790.CEL  
01-PP-M-cells GSM190789.CEL



Cluster0145\_intestine-related (13 nodes)

567.7  
537.8  
507.9  
478  
448.2  
418.3  
388.4  
358.5  
328.6  
298.8  
268.9  
239  
209.1  
179.3  
149.4  
119.5  
89.6  
59.8  
29.9  
0

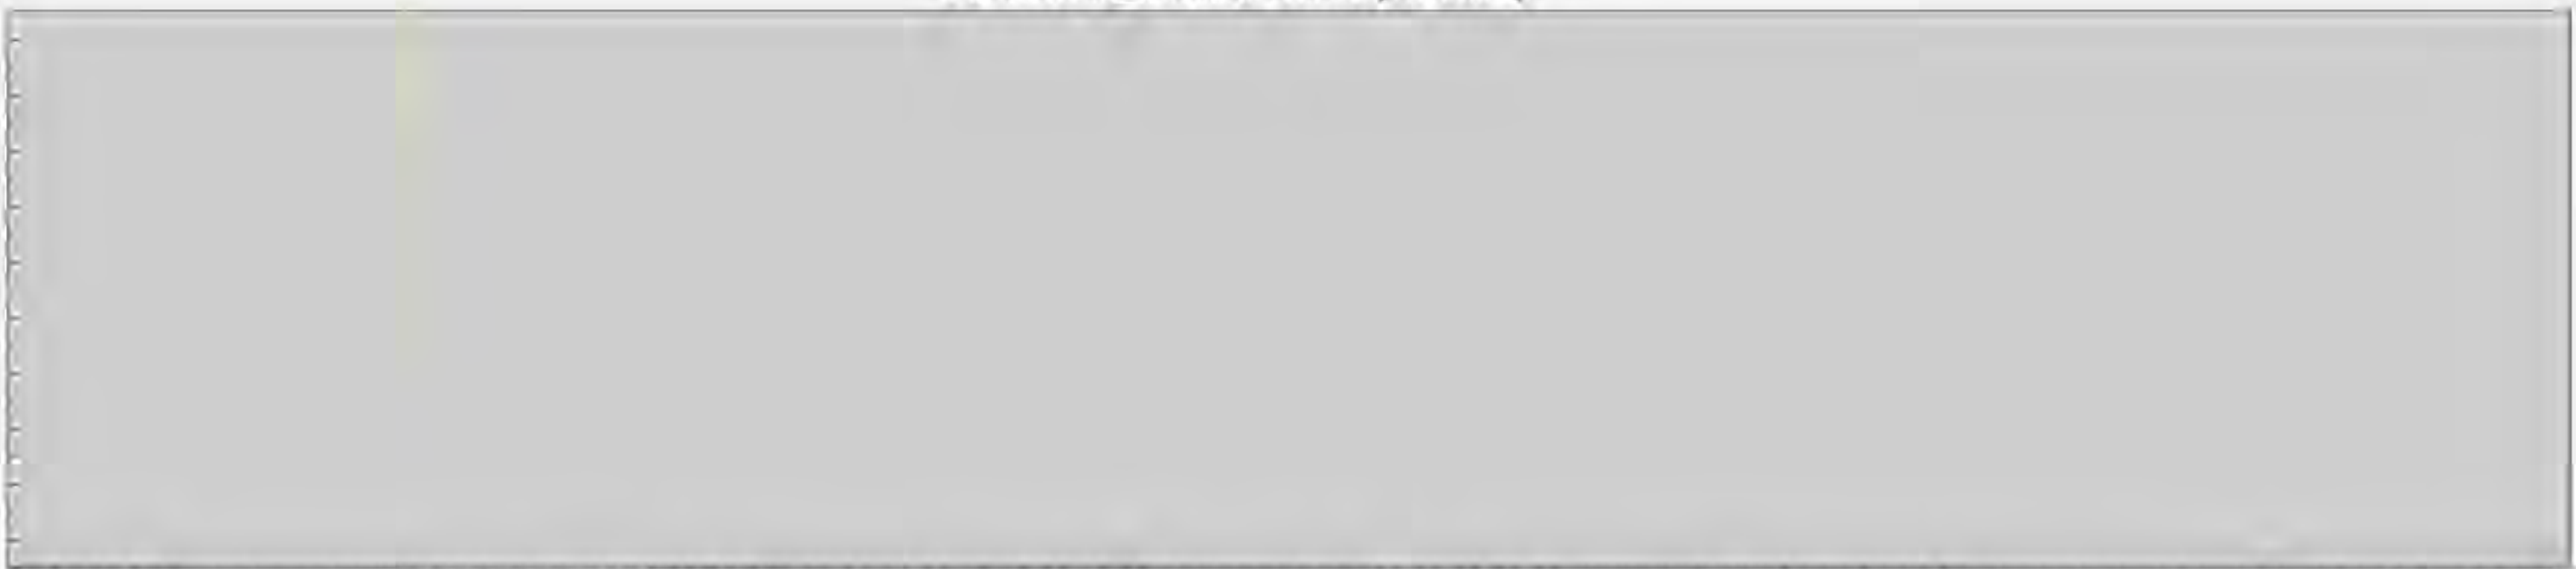

|     |                            |              |      |
|-----|----------------------------|--------------|------|
| 30  | NALT                       | GSM2899411   | CELL |
| 129 | NALT                       | GSM2899410   | CELL |
| 128 | NALT                       | GSM2899409   | CELL |
| 127 | NALT                       | GSM2899408   | CELL |
| 126 | Colon-d9                   | GSM1988104   | CELL |
| 125 | Colon-d9                   | GSM1988103   | CELL |
| 124 | Colon-d9                   | GSM1988102   | CELL |
| 123 | Colon-d4                   | GSM1988101   | CELL |
| 122 | Colon-d4                   | GSM1988100   | CELL |
| 121 | Intestine-large            | GSM258676    | CELL |
| 120 | Intestine-large            | GSM258675    | CELL |
| 119 | Intestine-small            | GSM258674    | CELL |
| 118 | Intestine-small            | GSM258673    | CELL |
| 117 | Lymph-nodes                | GSM258672    | CELL |
| 116 | Spleen                     | GSM258671    | CELL |
| 115 | Spleen                     | GSM258670    | CELL |
| 114 | Neuro2a                    | GSM258669    | CELL |
| 113 | Neuro2a                    | GSM258668    | CELL |
| 112 | Astrocytes                 | GSM2418998   | CELL |
| 111 | ming                       | GSM258667    | CELL |
| 110 | ming                       | GSM258666    | CELL |
| 109 | ming                       | GSM258665    | CELL |
| 108 | MIMCD3                     | GSM258664    | CELL |
| 107 | MIMCD3                     | GSM258663    | CELL |
| 106 | Bruce4                     | GSM258662    | CELL |
| 105 | Bruce4                     | GSM258661    | CELL |
| 104 | C2C12                      | GSM258660    | CELL |
| 103 | C2C12                      | GSM258659    | CELL |
| 102 | NH3T3                      | GSM258658    | CELL |
| 101 | NH3T3                      | GSM258657    | CELL |
| 100 | 3T3-L1                     | GSM258656    | CELL |
| 99  | 3T3-L1                     | GSM258655    | CELL |
| 98  | 10T12                      | GSM258654    | CELL |
| 97  | 10T12                      | GSM258653    | CELL |
| 96  | Osteoblast-d21             | GSM258652    | CELL |
| 95  | Osteoblast-d14             | GSM258651    | CELL |
| 94  | Osteoblast-d14             | GSM258650    | CELL |
| 93  | Osteoblast-d5              | GSM258649    | CELL |
| 92  | Osteoblast-d5              | GSM258648    | CELL |
| 91  | Chondrocytes               | GSM258647    | CELL |
| 90  | Chondrocytes               | GSM258646    | CELL |
| 89  | Nat Helper cell            | GSM465594    | CELL |
| 88  | Nat Helper cell            | GSM465593    | CELL |
| 87  | T cell                     | GSM465592    | CELL |
| 86  | MS-1                       | GSM234692    | CELL |
| 85  | Lymph-endc-cells           | GSM143704    | CELL |
| 84  | PP-FDC                     | GSM481977    | CELL |
| 83  | PP-FDC                     | GSM481978    | CELL |
| 82  | PP-FDC                     | GSM481979    | CELL |
| 81  | PP-FDC                     | GSM481976    | CELL |
| 80  | E-L                        | RMLNDC003001 | CELL |
| 79  | E-L                        | RMLNDC003001 | CELL |
| 78  | Follicular-Bcells          | GSM258664    | CELL |
| 77  | Follicular-Bcells          | GSM258663    | CELL |
| 76  | MZ-Bcell                   | GSM258662    | CELL |
| 75  | MZ-Bcell                   | GSM258661    | CELL |
| 74  | BAF3                       | GSM258660    | CELL |
| 73  | BAF3                       | GSM258659    | CELL |
| 72  | Tregs                      | GSM258658    | CELL |
| 71  | T-cells-CD8+               | GSM258657    | CELL |
| 70  | T-cells-CD8+               | GSM258656    | CELL |
| 69  | T-cells-CD4+               | GSM258655    | CELL |
| 68  | T-cells-CD4+               | GSM258654    | CELL |
| 67  | T-cells-CD4+               | GSM258653    | CELL |
| 66  | Thymocyte-DN               | GSM465595    | CELL |
| 65  | Osteoclasts                | GSM258652    | CELL |
| 64  | Microglia                  | GSM258651    | CELL |
| 63  | Microglia                  | GSM258650    | CELL |
| 62  | MM-LPS-7h                  | GSM258649    | CELL |
| 61  | MM-LPS-7h                  | GSM258648    | CELL |
| 60  | MM-LPS-6h                  | GSM258647    | CELL |
| 59  | MM-LPS-6h                  | GSM258646    | CELL |
| 58  | MM-LPS-6h                  | GSM258645    | CELL |
| 57  | MM-LPS-6h                  | GSM258644    | CELL |
| 56  | MM-LPS-6h                  | GSM258643    | CELL |
| 55  | MM-LPS-6h                  | GSM258642    | CELL |
| 54  | MM-LPS-6h                  | GSM258641    | CELL |
| 53  | MM-LPS-6h                  | GSM258640    | CELL |
| 52  | MM-LPS-6h                  | GSM258639    | CELL |
| 51  | MM-LPS-6h                  | GSM258638    | CELL |
| 50  | CD8a-DC                    | GSM258647    | CELL |
| 49  | CD8a-DC                    | GSM258646    | CELL |
| 48  | CD8a+DC                    | GSM258645    | CELL |
| 47  | NK-cells                   | GSM258644    | CELL |
| 46  | NK-cells                   | GSM258643    | CELL |
| 45  | Mast-cells-IgE+Ad          | GSM258642    | CELL |
| 44  | Mast-cells-IgE+Ad          | GSM258641    | CELL |
| 43  | Mast-cells-IgE             | GSM258640    | CELL |
| 42  | Mast-cells-IgE             | GSM258639    | CELL |
| 41  | Mast-cells                 | GSM258638    | CELL |
| 40  | Granulocytes               | GSM258637    | CELL |
| 39  | Granulocytes               | GSM258636    | CELL |
| 38  | GMP                        | GSM258635    | CELL |
| 37  | GMP                        | GSM258634    | CELL |
| 36  | GMP                        | GSM258633    | CELL |
| 35  | GMP                        | GSM258632    | CELL |
| 34  | GMP                        | GSM258631    | CELL |
| 33  | GMP                        | GSM258630    | CELL |
| 32  | GMP                        | GSM258629    | CELL |
| 31  | MEP                        | GSM258628    | CELL |
| 30  | MEP                        | GSM258627    | CELL |
| 29  | HS-C                       | GSM258626    | CELL |
| 28  | Bone marrow                | GSM258625    | CELL |
| 27  | paneth-cells-GF            | GSM116357    | CELL |
| 26  | paneth-cells-GF            | GSM116356    | CELL |
| 25  | paneth-cells               | GSM116355    | CELL |
| 24  | paneth-cells               | GSM116354    | CELL |
| 23  | paneth-cells               | GSM116353    | CELL |
| 22  | paneth-cells               | GSM116352    | CELL |
| 21  | Colon-Crypt                | GSM480375    | CELL |
| 20  | Colon-Crypt                | GSM480374    | CELL |
| 19  | Colon-Vill                 | GSM480363    | CELL |
| 18  | Colon-Vill                 | GSM480362    | CELL |
| 17  | Colon-IEC-Gf               | GSM349880    | CELL |
| 16  | Colon-IEC-Gf               | GSM350375    | CELL |
| 15  | Ileum-IEC                  | GSM350376    | CELL |
| 14  | Ileum-IEC                  | GSM350377    | CELL |
| 13  | Small-intestine-epithelium | RMINEP002001 | CELL |
| 12  | Small-intestine-epithelium | RMINEP001001 | CELL |
| 11  | FAE                        | RMPYEP001001 | CELL |
| 10  | FAE                        | RMPYEP001001 | CELL |
| 09  | Ileum-IEC                  | GSM190797    | CELL |
| 08  | Ileum-IEC                  | GSM190796    | CELL |
| 07  | Ileum-IEC                  | GSM190795    | CELL |
| 06  | CT-v-M-cells               | GSM190794    | CELL |
| 05  | CT-v-M-cells               | GSM190793    | CELL |
| 04  | CT-y-M-cells               | GSM190792    | CELL |
| 03  | PP-M-cells                 | GSM190791    | CELL |
| 02  | PP-M-cells                 | GSM190790    | CELL |
| 01  | PP-M-cells                 | GSM190789    | CELL |



Cluster0146\_High in colonic IEC (12 nodes)

755.1  
715.4  
675.6  
635.9  
596.1  
556.4  
516.7  
476.9  
437.2  
397.4  
357.7  
317.9  
278.2  
238.5  
198.7  
159  
119.2  
79.5  
39.7  
0

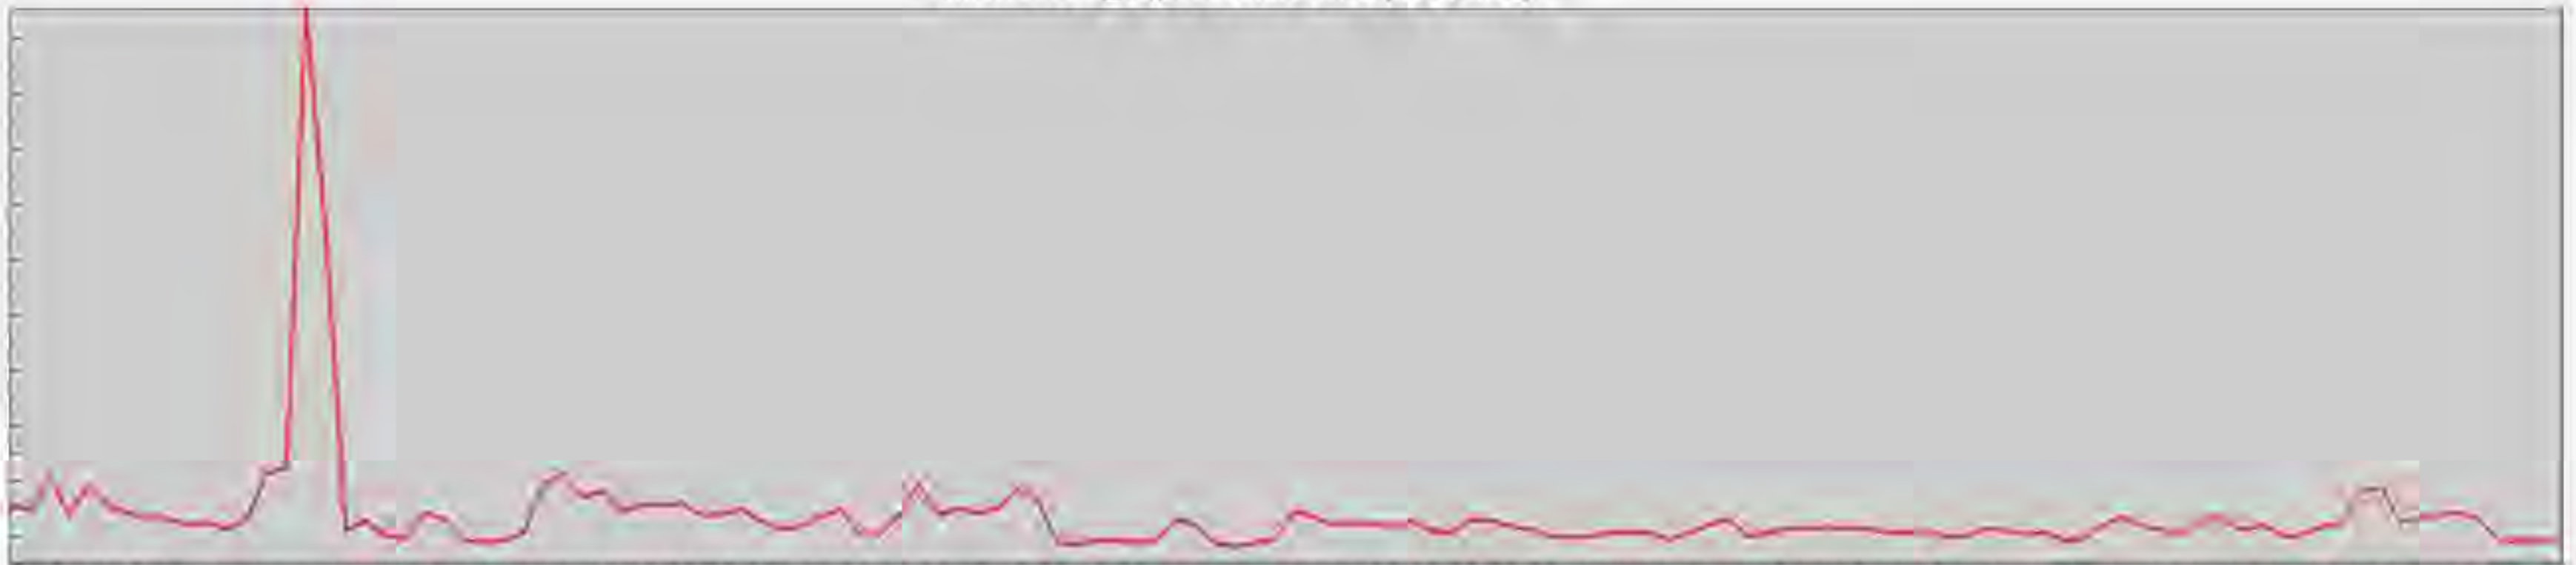

01-PP-M-cells\_GSM190789.CEL  
 02-PP-M-cells\_GSM190790.CEL  
 03-PP-M-cells\_GSM190791.CEL  
 04-CT-v-M-cells\_GSM190792.CEL  
 05-CT-v-M-cells\_GSM190793.CEL  
 06-CT-v-M-cells\_GSM190794.CEL  
 07-Ileum-IEC\_GSM190795.CEL  
 08-Ileum-IEC\_GSM190796.CEL  
 09-Ileum-IEC\_GSM190797.CEL  
 10-FAE-RMPYEP001001.CEL  
 11-FAE-RMPYEP002001.CEL  
 12-Small-intestine-epithelium\_RMINEP001001.CEL  
 13-Small-intestine-epithelium\_RMINEP002001.CEL  
 14-Ileum-IEC\_GSM350371.CEL  
 15-Ileum-IEC\_GSM350375.CEL  
 16-Colon-IEC-Gf\_GSM349880.CEL  
 17-Colon-IEC-Gf\_GSM349880.CEL  
 18-Colon-Vill-GSM480362.CEL  
 19-Colon-Vill-GSM480363.CEL  
 20-Colon-Crypt-GSM480374.CEL  
 21-Colon-Crypt-GSM480375.CEL  
 22-Paneth-cells-GSM318590.CEL  
 23-Paneth-cells-GSM318590.CEL  
 24-Paneth-cells-GSM116359.CEL  
 25-Paneth-cells-GSM116359.CEL  
 26-Paneth-cells-Gf-1-GSM116357.CEL  
 27-Paneth-cells-Gf-1-GSM116357.CEL  
 28-Bone marrow\_GSM258627.CEL  
 29-Bone marrow\_GSM258627.CEL  
 30-HSC-GSM258770.CEL  
 31-HSC-GSM258770.CEL  
 32-MEP-GSM258770.CEL  
 33-MEP-GSM258770.CEL  
 34-MEP-GSM258770.CEL  
 35-MEP-GSM258770.CEL  
 36-MEP-GSM258770.CEL  
 37-MEP-GSM258770.CEL  
 38-Granulocytes\_GSM258667.CEL  
 39-Granulocytes\_GSM258667.CEL  
 40-Mast-cells\_GSM258712.CEL  
 41-Mast-cells\_GSM258712.CEL  
 42-Mast-cells-IdG-GSM258714.CEL  
 43-Mast-cells-IdG-GSM258714.CEL  
 44-Mast-cells-IdG+Ad-GSM258719.CEL  
 45-Mast-cells-IdG+Ad-GSM258719.CEL  
 46-NK-cells\_GSM258731.CEL  
 47-NK-cells\_GSM258731.CEL  
 48-CD8a+DC\_GSM258646.CEL  
 49-CD8a+DC\_GSM258646.CEL  
 50-CD8a-DC-GSM258647.CEL  
 51-CD8a-DC-GSM258647.CEL  
 52-Plasmacytoid-DC-GSM258649.CEL  
 53-Plasmacytoid-DC-GSM258649.CEL  
 54-BMM-GSM258694.CEL  
 55-BMM-GSM258694.CEL  
 56-BMM-LPS-6h-GSM258700.CEL  
 57-BMM-LPS-6h-GSM258700.CEL  
 58-PPM-LPS-7h-GSM268706.CEL  
 59-PPM-LPS-7h-GSM268706.CEL  
 60-PPM-LPS-7h-GSM268706.CEL  
 61-PPM-LPS-7h-GSM268706.CEL  
 62-Microglia-GSM258721.CEL  
 63-Microglia-GSM258721.CEL  
 64-Osteoclasts-GSM258743.CEL  
 65-Osteoclasts-GSM258743.CEL  
 66-Thymocyte-DN\_GSM465595.CEL  
 67-T-cells-CD4+GSM258773.CEL  
 68-T-cells-CD4+GSM258773.CEL  
 69-T-cells-CD8+GSM258776.CEL  
 70-T-cells-CD8+GSM258776.CEL  
 71-Tregs-GSM258778.CEL  
 72-Tregs-GSM258778.CEL  
 73-BAF3-GSM258620.CEL  
 74-BAF3-GSM258620.CEL  
 75-MZ-Bcell-GSM258621.CEL  
 76-MZ-Bcell-GSM258621.CEL  
 77-Follicular-Bcells-GSM258664.CEL  
 78-Follicular-Bcells-GSM258664.CEL  
 79-E-L-Y-RMLNDC002001.CEL  
 80-E-L-Y-RMLNDC003001.CEL  
 81-PP-FDC-GSM481978.CEL  
 82-PP-FDC-GSM481978.CEL  
 83-PP-FDC-GSM481978.CEL  
 84-Lymph-endo-cells\_GSM143704.CEL  
 85-MS-1\_GSM234692.CEL  
 86-LTcell\_GSM465596.CEL  
 87-Nat Helper cell\_GSM465593.CEL  
 88-Nat Helper cell\_GSM465593.CEL  
 89-Chondrocytes\_GSM266741.CEL  
 90-Chondrocytes\_GSM266741.CEL  
 91-Osteoblast-d5-GSM258741.CEL  
 92-Osteoblast-d5-GSM258741.CEL  
 93-Osteoblast-d14-GSM258737.CEL  
 94-Osteoblast-d14-GSM258737.CEL  
 95-Osteoblast-d21-GSM258739.CEL  
 96-Osteoblast-d21-GSM258739.CEL  
 97-10T12-GSM258631.CEL  
 98-10T12-GSM258631.CEL  
 99-3T3-L1\_GSM258610.CEL  
 100-3T3-L1\_GSM258610.CEL  
 101-NH3T3-GSM258739.CEL  
 102-NH3T3-GSM258739.CEL  
 103-C2C12-GSM258629.CEL  
 104-C2C12-GSM258629.CEL  
 105-Bruce4-GSM258666.CEL  
 106-Bruce4-GSM258666.CEL  
 107-MIMCD3-GSM258724.CEL  
 108-MIMCD3-GSM258724.CEL  
 109-mim6-GSM258725.CEL  
 110-mim6-GSM258725.CEL  
 111-Astrocytes\_GSM241898.CEL  
 112-Astrocytes\_GSM241898.CEL  
 113-Spleen\_GSM258767.CEL  
 114-Spleen\_GSM258767.CEL  
 115-Spleen\_GSM258767.CEL  
 116-Lymph-nodes\_GSM258691.CEL  
 117-Lymph-nodes\_GSM258691.CEL  
 118-Intestine-small\_GSM258692.CEL  
 119-Intestine-small\_GSM258692.CEL  
 120-Intestine-large\_GSM258675.CEL  
 121-Intestine-large\_GSM258675.CEL  
 122-Intestine-large\_GSM258675.CEL  
 123-Colon-d4-GSM198810.CEL  
 124-Colon-d4-GSM198810.CEL  
 125-Colon-d9-GSM198810.CEL  
 126-Colon-d9-GSM198810.CEL  
 127-NALT\_GSM289408.CEL  
 128-NALT\_GSM289409.CEL  
 129-NALT\_GSM289410.CEL  
 130-NALT\_GSM289411.CEL



Cluster0147\_House keeping (12 nodes)

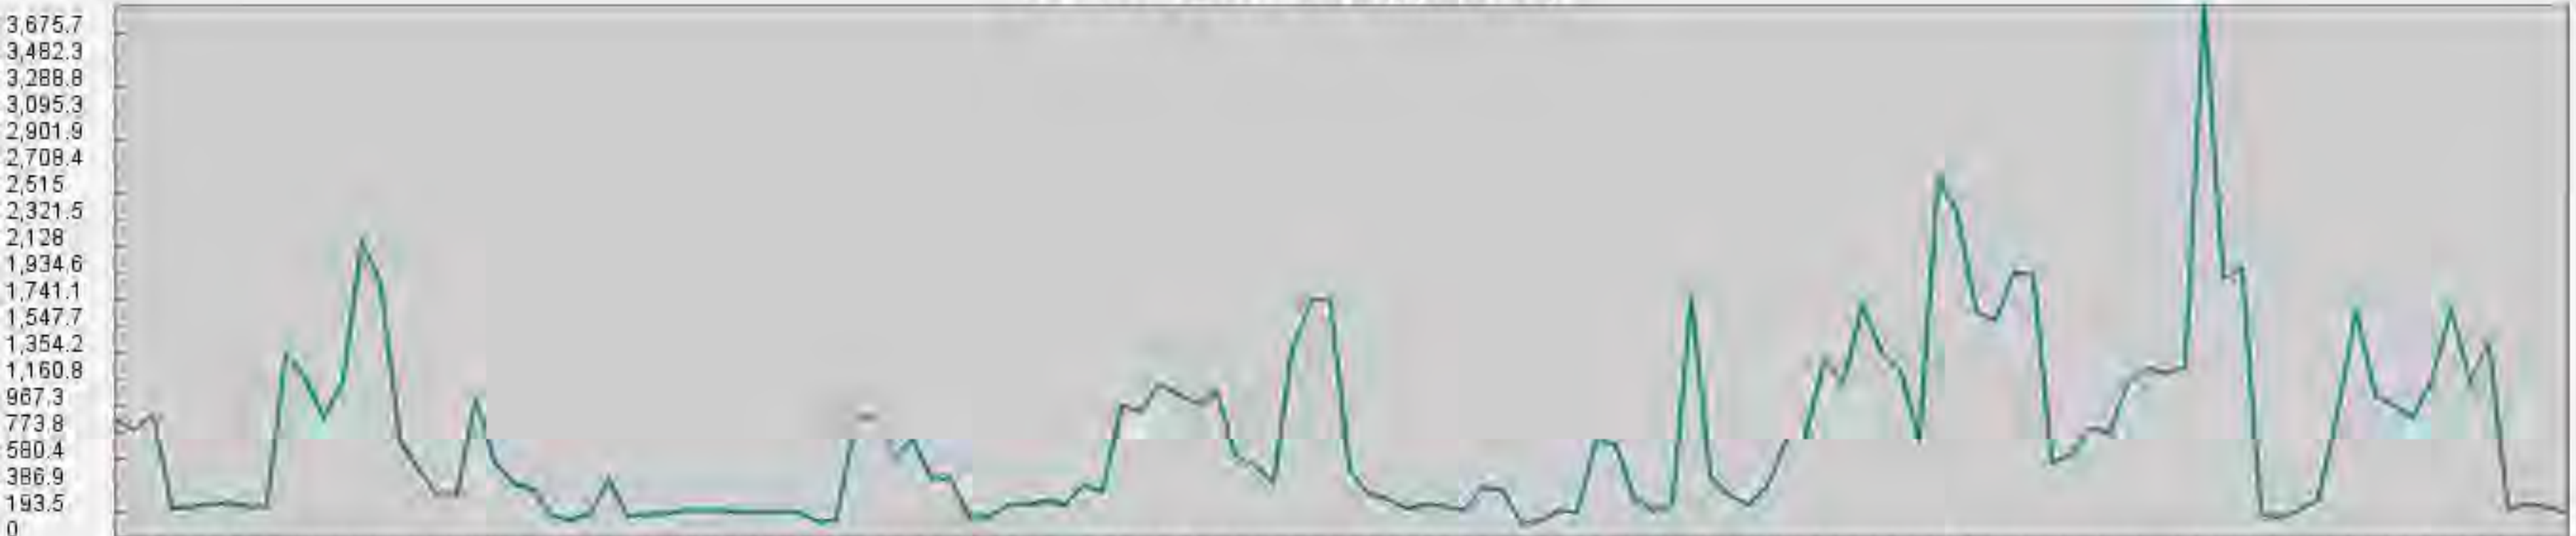

130-NALT GSM289411 CEL  
129-NALT GSM289410 CEL  
128-NALT GSM289409 CEL  
127-NALT GSM289408 CEL  
126-Colon-d9 GSM1988105 CEL  
125-Colon-d9 GSM1988104 CEL  
124-Colon-d9 GSM1988103 CEL  
123-Colon-d4 GSM1988102 CEL  
122-Colon-d4 GSM1988101 CEL  
121-Intestine-large GSM258676 CEL  
120-Intestine-large GSM258675 CEL  
119-Intestine-small GSM258678 CEL  
118-Intestine-small GSM258677 CEL  
117-Lymph-nodes GSM258691 CEL  
116-Lymph-nodes GSM258692 CEL  
115-Spleen GSM258766 CEL  
114-Spleen GSM258767 CEL  
113-Neuro2a GSM258728 CEL  
112-Neuro2a GSM258727 CEL  
111-Astrocytes GSM241898 CEL  
110-mim6 GSM258726 CEL  
109-mim6 GSM258725 CEL  
108-MIMCD3 GSM258724 CEL  
107-MIMCD3 GSM258723 CEL  
106-Bruce4 GSM258656 CEL  
105-Bruce4 GSM258655 CEL  
104-C2C12 GSM258690 CEL  
103-C2C12 GSM258689 CEL  
102-NH3T3 GSM258739 CEL  
101-NH3T3 GSM258738 CEL  
100-3T3-L1 GSM258610 CEL  
99-3T3-L1 GSM258609 CEL  
98-10T12 GSM258632 CEL  
97-10T12 GSM258631 CEL  
96-Osteoblast-d21 GSM258740 CEL  
95-Osteoblast-d21 GSM258739 CEL  
94-Osteoblast-d14 GSM258738 CEL  
93-Osteoblast-d14 GSM258737 CEL  
92-Osteoblast-d5 GSM258742 CEL  
91-Osteoblast-d5 GSM258741 CEL  
90-Chondrocytes GSM266741 CEL  
89-Chondrocytes GSM266740 CEL  
88-Nat Helper cell GSM465594 CEL  
87-Nat Helper cell GSM465593 CEL  
86-TT cell GSM465596 CEL  
85-MS-1 GSM234692 CEL  
84-Lymph-endg-cells GSM143704 CEL  
83-Lymph-FDC GSM481977 CEL  
82-Lymph-FDC GSM481978 CEL  
81-Lymph-FDC GSM481976 CEL  
80-Lymph-FDC GSM481975 CEL  
79-LY RMLNDCC003001 CEL  
78-LY RMLNDCC003001 CEL  
77-Follicular-Bcells GSM258664 CEL  
76-Follicular-Bcells GSM258663 CEL  
75-MZ-Bcell GSM258622 CEL  
74-MZ-Bcell GSM258621 CEL  
73-BAF3 GSM258620 CEL  
72-BAF3 GSM258619 CEL  
71-Tregs GSM258778 CEL  
70-Tregs GSM258777 CEL  
69-T-cells-CD8+ GSM258776 CEL  
68-T-cells-CD8+ GSM258775 CEL  
67-T-cells-CD4+ GSM258774 CEL  
66-T-cells-CD4+ GSM258773 CEL  
65-Thymocyte-DN GSM465595 CEL  
64-Osteoclasts GSM258744 CEL  
63-Microglia GSM258721 CEL  
62-Microglia GSM258721 CEL  
61-PM-M-PS-7h GSM258706 CEL  
60-PM-M-PS-7h GSM258705 CEL  
59-PM-M-PS-7h GSM258702 CEL  
58-PM-M-PS-6h GSM258701 CEL  
57-BMM-LPS-6h GSM258699 CEL  
56-BMM-LPS-6h GSM258699 CEL  
55-BMM-LPS-6h GSM258699 CEL  
54-BMM-LPS-6h GSM258699 CEL  
53-Plasmacytoid-DC GSM258650 CEL  
52-Plasmacytoid-DC GSM258649 CEL  
51-CD8a-DC GSM258647 CEL  
50-CD8a-DC GSM258647 CEL  
49-CD8a+DC GSM258646 CEL  
48-CD8a+DC GSM258645 CEL  
47-NK-cells GSM258732 CEL  
46-NK-cells GSM258731 CEL  
45-Mast-cells-IgE+Ad GSM258718 CEL  
44-Mast-cells-IgE+Ad GSM258717 CEL  
43-Mast-cells-IgE GSM258714 CEL  
42-Mast-cells-IgE GSM258713 CEL  
41-Mast-cells GSM258712 CEL  
40-Granulocytes GSM258668 CEL  
39-Granulocytes GSM258667 CEL  
38-GMP GSM258666 CEL  
37-GMP GSM258666 CEL  
36-GMP GSM258666 CEL  
35-GMP GSM258642 CEL  
34-GMP GSM258641 CEL  
33-MEP GSM258720 CEL  
32-MEP GSM258719 CEL  
31-HSC GSM258770 CEL  
30-HSC GSM258769 CEL  
29-Bone marrow GSM258628 CEL  
28-Bone marrow GSM258627 CEL  
27-Paneth-cells-GF-1 GSM116357 CEL  
26-Paneth-cells-GF-1 GSM116350 CEL  
25-Paneth-cells GSM116350 CEL  
24-Paneth-cells GSM116359 CEL  
23-Paneth-cells GSM318589 CEL  
22-Paneth-cells GSM318590 CEL  
21-Colon-Crypt GSM480375 cel  
20-Colon-Crypt GSM480374 cel  
19-Colon-Vill GSM480363 cel  
18-Colon-Vill GSM480362 cel  
17-Colon-IEC-GF GSM349880 CEL  
16-Colon-IEC-GF GSM350375 CEL  
15-Ileum-IEC-GF GSM350376 CEL  
14-Ileum-IEC GSM350371 CEL  
13-Small-intestine-epithelium RMINEP002901 CEL  
12-Small-intestine-epithelium RMINEP001001 CEL  
11-FAE-RMPYEP002001 CEL  
10-FAE-RMPYEP001001 CEL  
09-Ileum-IEC GSM190797 CEL  
08-Ileum-IEC GSM190796 CEL  
07-Ileum-IEC GSM190795 CEL  
06-CT-v-M-cells GSM190794 CEL  
05-CT-v-M-cells GSM190793 CEL  
04-CT-v-M-cells GSM190792 CEL  
03-PP-M-cells GSM190791 CEL  
02-PP-M-cells GSM190790 CEL  
01-PP-M-cells GSM190789 CEL



Cluster0148\_intestine-related (12 nodes)

1,022.6  
968.8  
915  
861.1  
807.3  
753.5  
699.7  
645.9  
592  
538.2  
484.4  
430.6  
376.7  
322.9  
269.1  
215.3  
161.5  
107.6  
53.8  
0

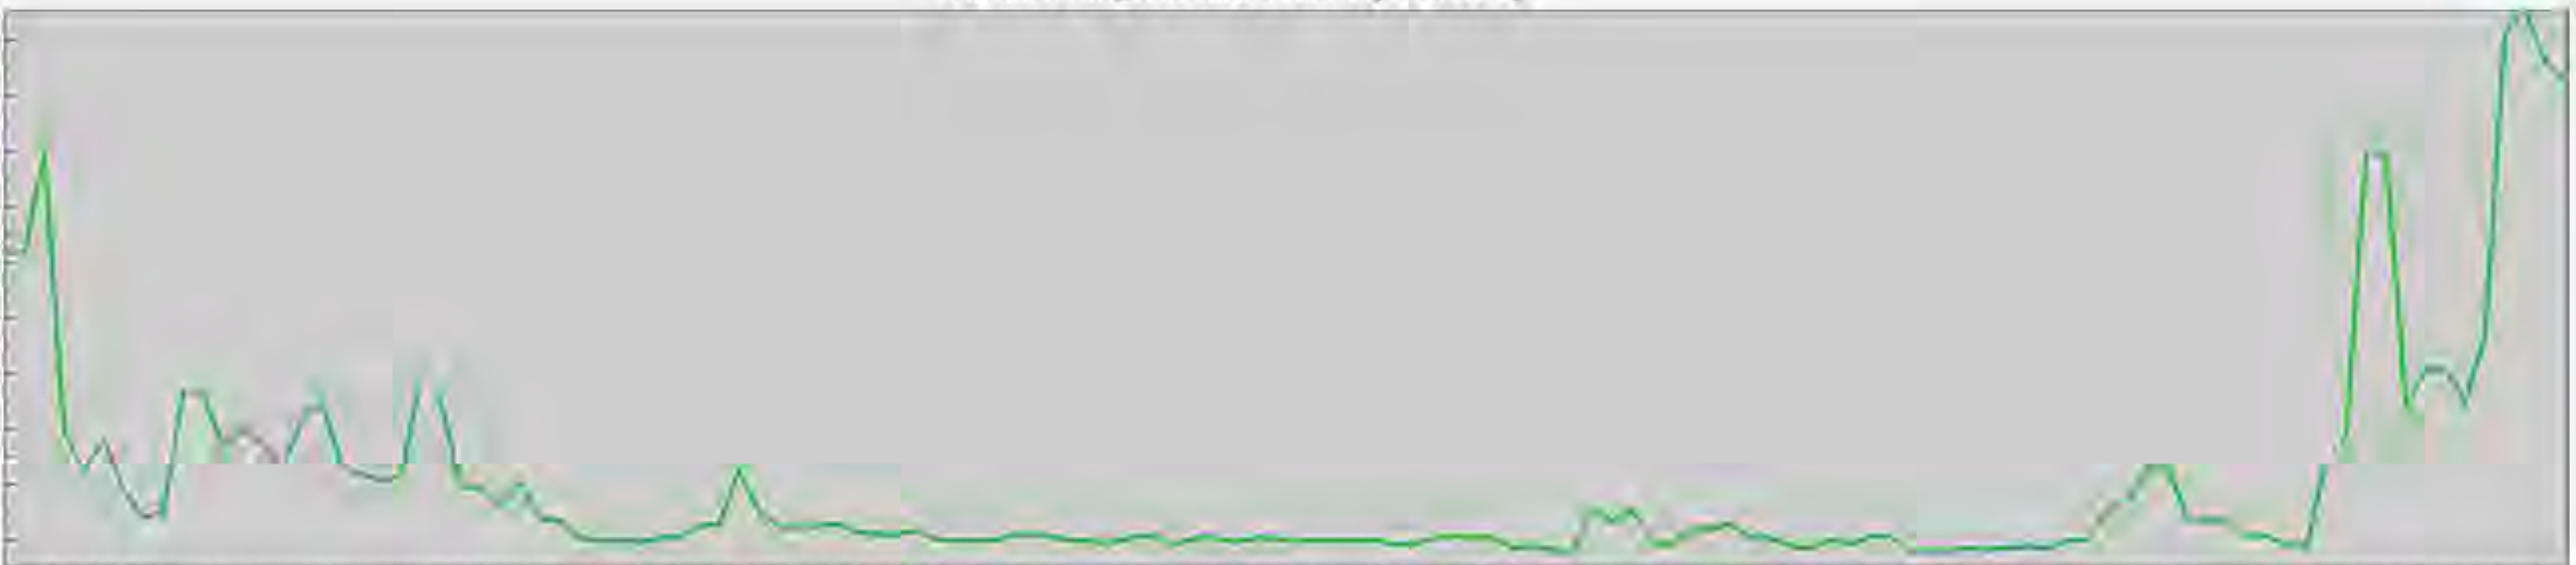

130-NALT GSM289411.CEL  
 129-NALT GSM289410.CEL  
 128-NALT GSM289409.CEL  
 127-NALT GSM289408.CEL  
 126-Colon-d9 GSM1988105.CEL  
 125-Colon-d9 GSM1988104.CEL  
 124-Colon-d9 GSM1988103.CEL  
 123-Colon-d4 GSM1988102.CEL  
 122-Colon-d4 GSM1988101.CEL  
 121-Intestine-large GSM258676.CEL  
 120-Intestine-large GSM258675.CEL  
 119-Intestine-small GSM258678.CEL  
 118-Intestine-small GSM258677.CEL  
 117-Lymph-nodes GSM258691.CEL  
 116-Lymph-nodes GSM258692.CEL  
 115-Spleen GSM258766.CEL  
 114-Spleen GSM258767.CEL  
 113-Neuro2a GSM258728.CEL  
 112-Neuro2a GSM258727.CEL  
 111-Astrocytes GSM241898.CEL  
 110-mim6 GSM258726.CEL  
 109-mim6 GSM258725.CEL  
 108-MIMCD3 GSM258724.CEL  
 107-MIMCD3 GSM258723.CEL  
 106-Bruce4 GSM258656.CEL  
 105-Bruce4 GSM258655.CEL  
 104-C2C12 GSM258690.CEL  
 103-C2C12 GSM258689.CEL  
 102-NH3T3 GSM258730.CEL  
 101-NH3T3 GSM258729.CEL  
 100-3T3-L1 GSM258610.CEL  
 99-3T3-L1 GSM258609.CEL  
 98-10T12 GSM258632.CEL  
 97-10T12 GSM258631.CEL  
 96-Osteoblast-d21 GSM258740.CEL  
 95-Osteoblast-d21 GSM258739.CEL  
 94-Osteoblast-d14 GSM258738.CEL  
 93-Osteoblast-d14 GSM258737.CEL  
 92-Osteoblast-d5 GSM258742.CEL  
 91-Osteoblast-d5 GSM258741.CEL  
 90-Chondrocytes GSM266741.CEL  
 89-Chondrocytes GSM266740.CEL  
 88-Nat Helper cell GSM465594.CEL  
 87-Nat Helper cell GSM465593.CEL  
 86-TT cell GSM465596.CEL  
 85-MS-1 GSM234692.CEL  
 84-Lymph-endo-cells GSM143704.CEL  
 83-P-FDC GSM481977.CEL  
 82-P-FDC GSM481978.CEL  
 81-P-FDC GSM481976.CEL  
 80-F-L-Y RMLNDCC003001.CEL  
 79-F-L-Y RMLNDCC003001.CEL  
 78-Follicular-Bcells GSM258664.CEL  
 77-Follicular-Bcells GSM258663.CEL  
 76-MZ-Bcell GSM258627.CEL  
 75-MZ-Bcell GSM258621.CEL  
 74-BAF3 GSM258620.CEL  
 73-BAF3 GSM258619.CEL  
 72-Tregs GSM258778.CEL  
 71-Tregs GSM258777.CEL  
 70-T-cells-CD8+ GSM258776.CEL  
 69-T-cells-CD8+ GSM258775.CEL  
 68-T-cells-CD4+ GSM258774.CEL  
 67-T-cells-CD4+ GSM258773.CEL  
 66-Thymocyte-DN GSM465595.CEL  
 65-Osteoclasts GSM258743.CEL  
 64-Osteoclasts GSM258744.CEL  
 63-Microglia GSM258721.CEL  
 62-Microglia GSM258721.CEL  
 61-MM-LPS-7h GSM258706.CEL  
 60-MM-LPS-7h GSM258705.CEL  
 59-MM-LPS-6h GSM258702.CEL  
 58-MM-LPS-6h GSM258701.CEL  
 57-MM-LPS-6h GSM258700.CEL  
 56-MM-LPS-6h GSM258699.CEL  
 55-MM-LPS-6h GSM258699.CEL  
 54-MM-LPS-6h GSM258699.CEL  
 53-Plasmacytoid-DC GSM258650.CEL  
 52-Plasmacytoid-DC GSM258649.CEL  
 51-CD8a-DC GSM258647.CEL  
 50-CD8a-DC GSM258647.CEL  
 49-CD8a+DC GSM258646.CEL  
 48-CD8a+DC GSM258645.CEL  
 47-NK-cells GSM258732.CEL  
 46-NK-cells GSM258731.CEL  
 45-Mast-cells-IgE+Ad GSM258718.CEL  
 44-Mast-cells-IgE+Ad GSM258717.CEL  
 43-Mast-cells-IgE GSM258714.CEL  
 42-Mast-cells-IgE GSM258713.CEL  
 41-Mast-cells GSM258712.CEL  
 40-Granulocytes GSM258667.CEL  
 39-Granulocytes GSM258667.CEL  
 38-GMP GSM258666.CEL  
 37-GMP GSM258666.CEL  
 36-GMP GSM258665.CEL  
 35-CMP GSM258642.CEL  
 34-CMP GSM258642.CEL  
 33-MEP GSM258720.CEL  
 32-MEP GSM258719.CEL  
 31-HESC GSM258770.CEL  
 30-HESC GSM258769.CEL  
 29-Bone marrow GSM258628.CEL  
 28-Bone marrow GSM258627.CEL  
 27-paneth-cells-GE GSM116357.CEL  
 26-paneth-cells-GE GSM116357.CEL  
 25-paneth-cells GSM116350.CEL  
 24-paneth-cells GSM116359.CEL  
 23-paneth-cells GSM318589.CEL  
 22-paneth-cells GSM318590.CEL  
 21-Colon-Crypt GSM480375.CEL  
 20-Colon-Crypt GSM480374.CEL  
 19-Colon-Vill GSM480363.CEL  
 18-Colon-Vill GSM480362.CEL  
 17-Colon-IEC-GE GSM349880.CEL  
 16-Colon-IEC-GE GSM350375.CEL  
 15-Ileum-IEC-TGF GSM350376.CEL  
 14-Ileum-IEC GSM350371.CEL  
 13-Small-intestine-epithelium RMINEP002001.CEL  
 12-Small-intestine-epithelium RMINEP001001.CEL  
 11-FAE RMPYEP002001.CEL  
 10-FAE RMPYEP001001.CEL  
 09-Ileum-IEC GSM190797.CEL  
 08-Ileum-IEC GSM190796.CEL  
 07-Ileum-IEC GSM190795.CEL  
 06-CT-v-M-cells GSM190794.CEL  
 05-CT-v-M-cells GSM190793.CEL  
 04-PP-M-cells GSM190792.CEL  
 03-PP-M-cells GSM190791.CEL  
 02-PP-M-cells GSM190790.CEL  
 01-PP-M-cells GSM190789.CEL



Cluster0149\_High in NK cells, cDC, T cells, B cells and NH cells (12 nodes)

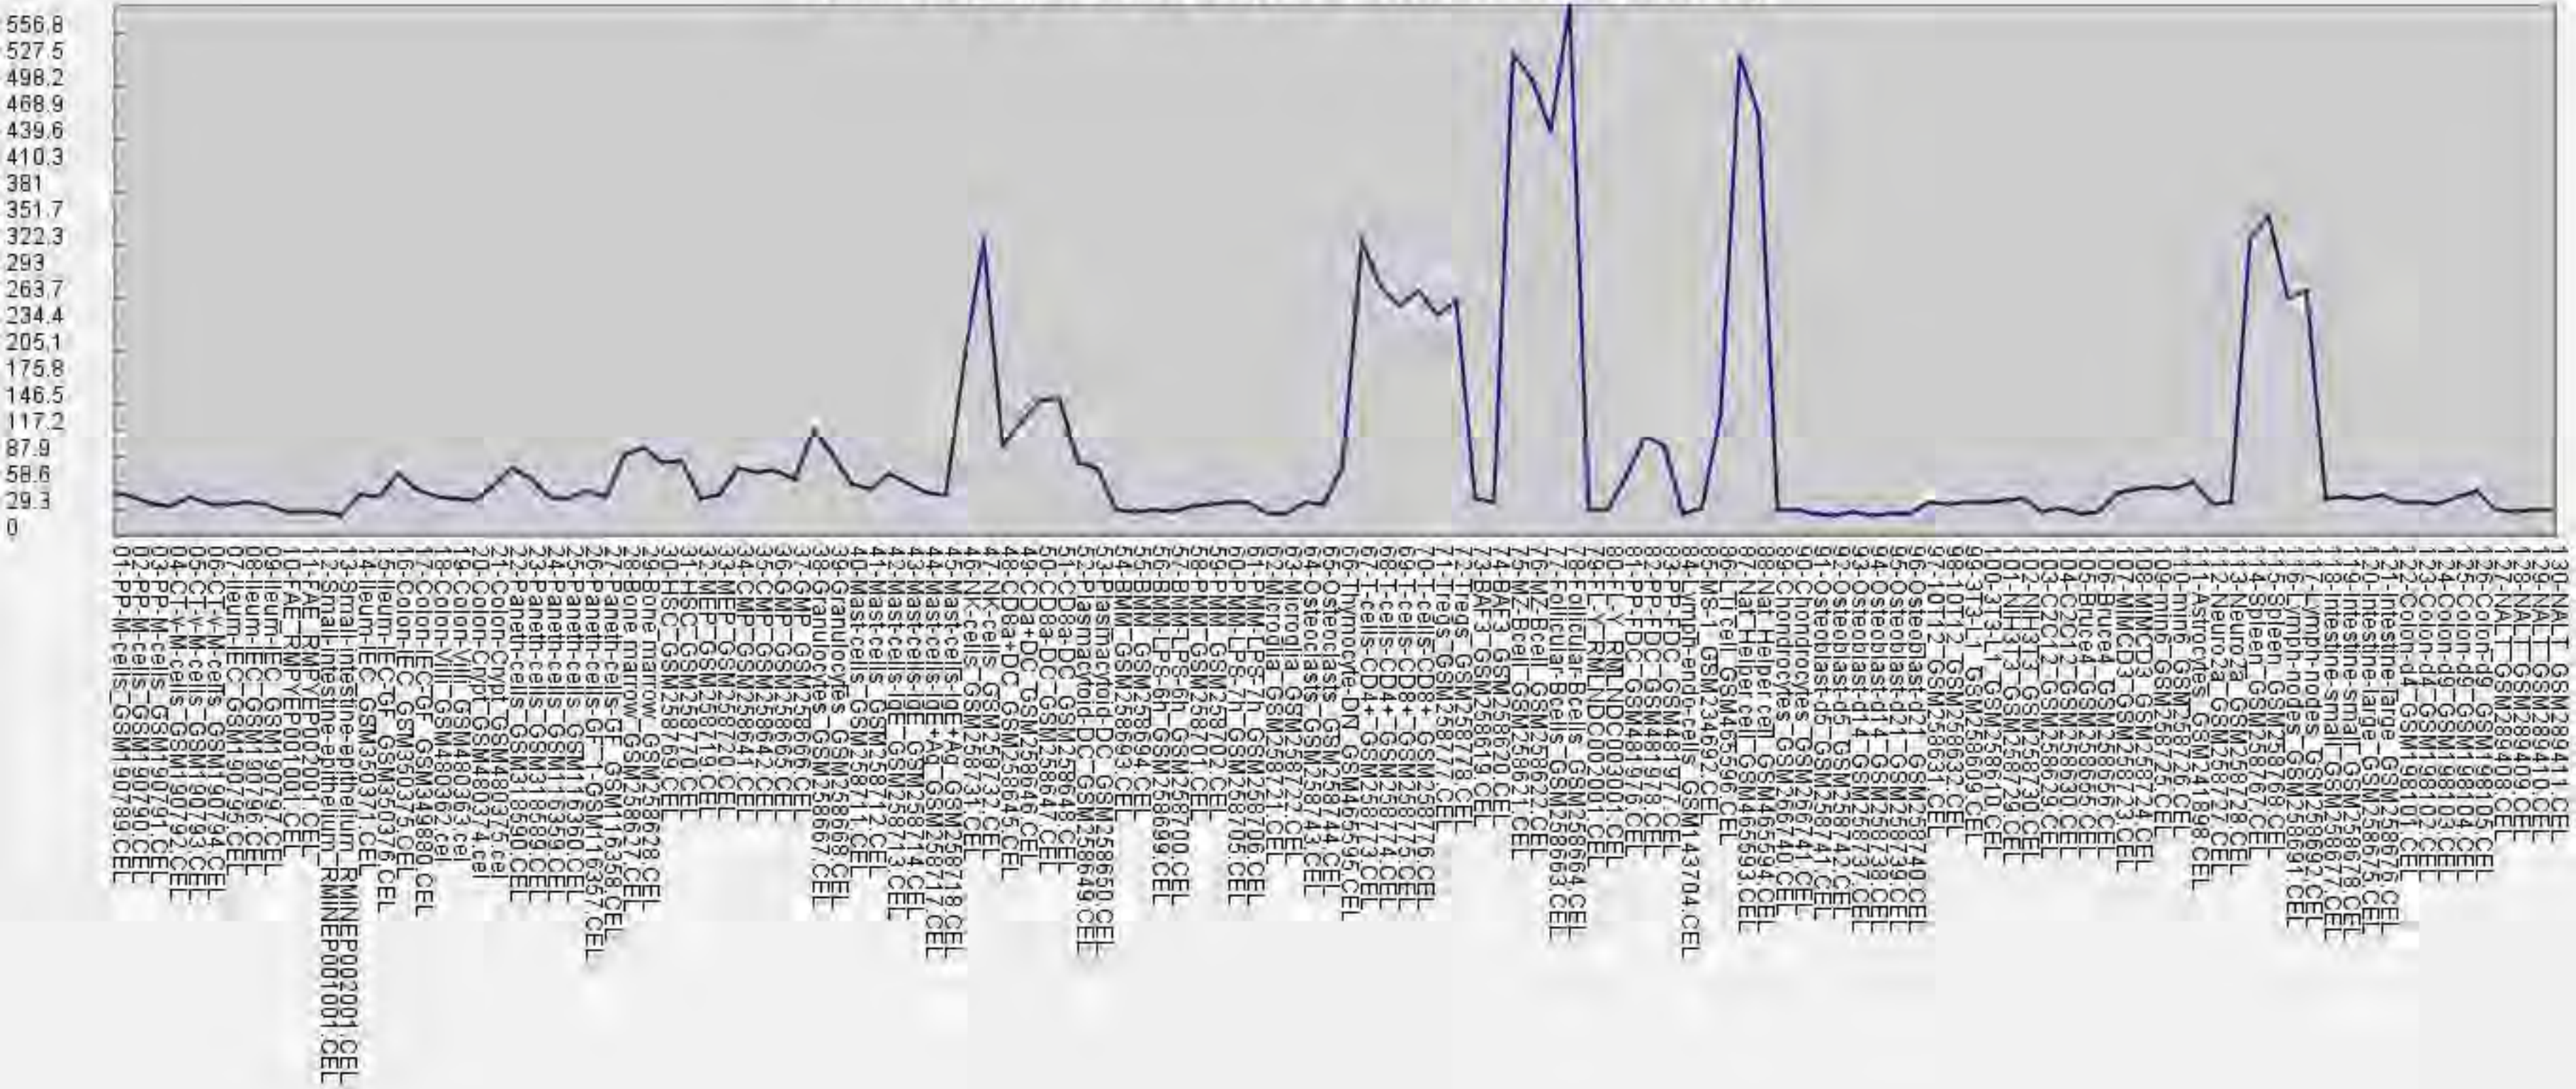



Cluster0150\_Low in Paneth cells (12 nodes)

228.6  
216.5  
204.5  
192.5  
180.5  
168.4  
156.4  
144.4  
132.3  
120.3  
108.3  
96.2  
84.2  
72.2  
60.2  
48.1  
36.1  
24.1  
12  
0

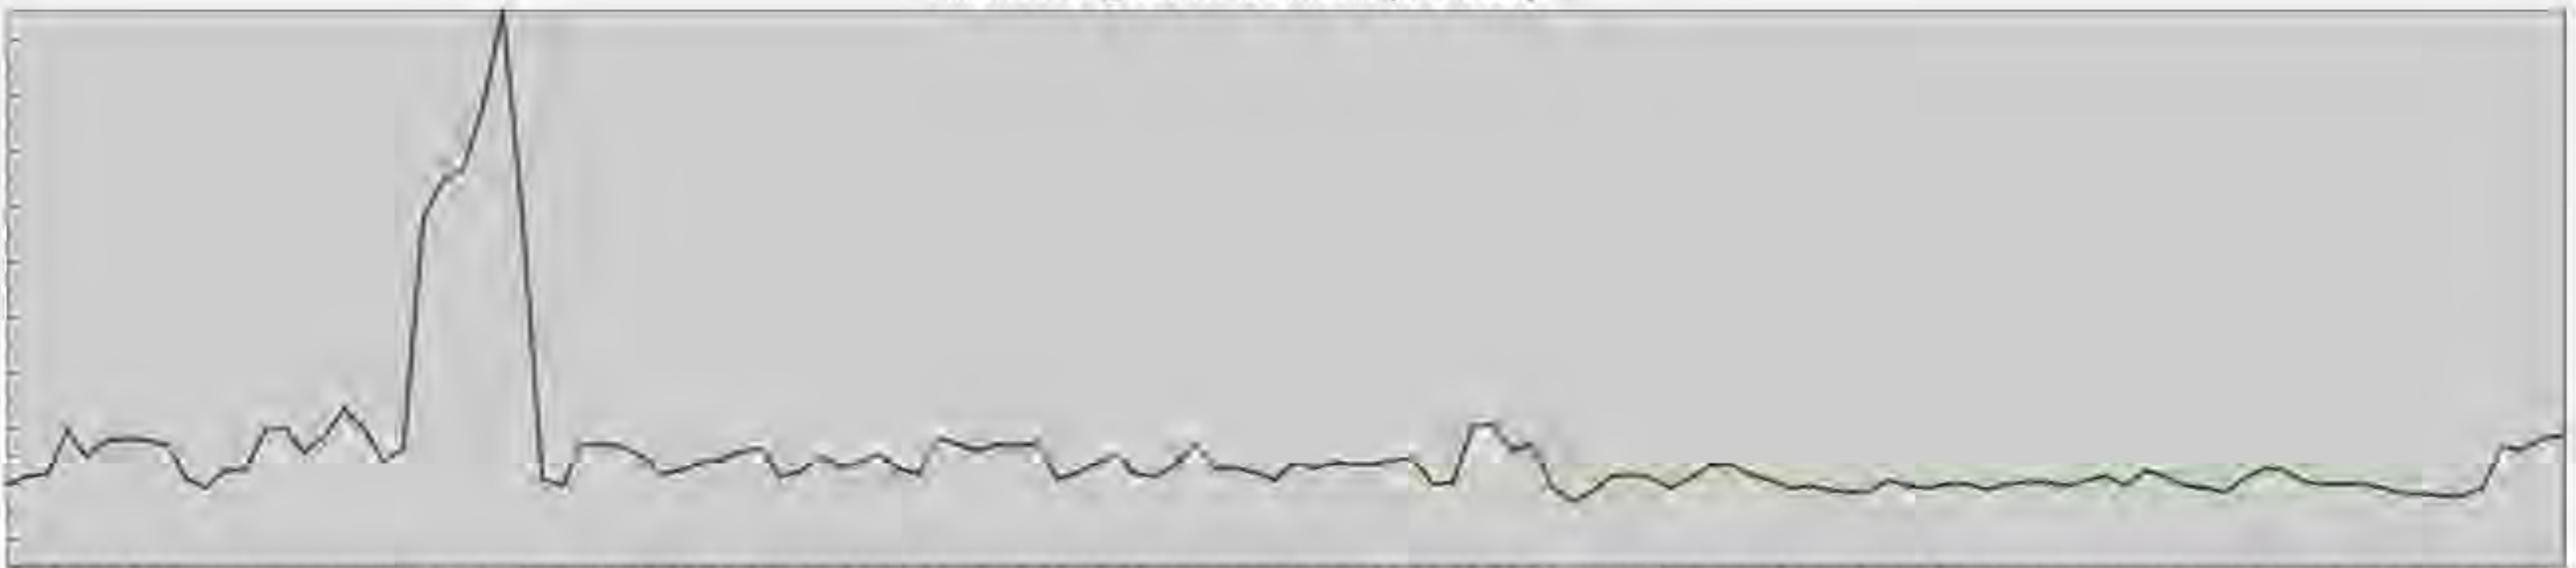

130-NALT GSM289411 CEL  
129-NALT GSM2889410 CEL  
128-NALT GSM2894408 CEL  
127-NALT GSM2894408 CEL  
126-paneth-cells-GF-1 GSM116357 CEL  
125-paneth-cells GSM116350 CEL  
124-paneth-cells GSM116359 CEL  
123-paneth-cells GSM318589 CEL  
122-paneth-cells GSM318590 CEL  
121-paneth-cells GSM480375 cel  
120-paneth-cells GSM480374 cel  
119-paneth-cells-GF-1 GSM116357 CEL  
118-paneth-cells-GF-1 GSM116358 CEL  
117-paneth-cells-GF-1 GSM116357 CEL  
116-paneth-cells-GF-1 GSM116358 CEL  
115-Spleen GSM258766 CEL  
114-Spleen GSM258767 CEL  
113-Neuro2a GSM258728 CEL  
112-Neuro2a GSM258727 CEL  
111-Astrocytes GSM241898 CEL  
110-mimb GSM258726 CEL  
109-mimb GSM258725 CEL  
108-MIMCD3 GSM258724 CEL  
107-MIMCD3 GSM258723 CEL  
106-Bruce4 GSM258656 CEL  
105-Bruce4 GSM258655 CEL  
104-C2C12 GSM258690 CEL  
103-C2C12 GSM258689 CEL  
102-NH3T3 GSM258730 CEL  
101-NH3T3 GSM258729 CEL  
100-3T3-L1 GSM258610 CEL  
99-3T3-L1 GSM258609 CEL  
98-10T12 GSM258632 CEL  
97-10T12 GSM258631 CEL  
96-Osteoblast-d21 GSM258740 CEL  
95-Osteoblast-d21 GSM258739 CEL  
94-Osteoblast-d14 GSM258738 CEL  
93-Osteoblast-d14 GSM258737 CEL  
92-Osteoblast-d5 GSM258742 CEL  
91-Osteoblast-d5 GSM258741 CEL  
90-Chondrocytes GSM266741 CEL  
89-Chondrocytes GSM266740 CEL  
88-Nat Helper cell GSM465594 CEL  
87-Nat Helper cell GSM465593 CEL  
86-TT cell GSM465596 CEL  
85-MS-1 GSM234692 CEL  
84-Lymph-endo-cells GSM143704 CEL  
83-PP-FDC GSM481977 CEL  
82-PP-FDC GSM481978 CEL  
81-PP-FDC GSM481976 CEL  
80-L-Y-RMLNDCC003001 CEL  
79-L-Y-RMLNDCC003001 CEL  
78-Follicular-Bcells GSM258664 CEL  
77-Follicular-Bcells GSM258663 CEL  
76-MZ-Bcell GSM258627 CEL  
75-MZ-Bcell GSM258627 CEL  
74-BAF3 GSM258620 CEL  
73-BAF3 GSM258619 CEL  
72-Tregs GSM258778 CEL  
71-Tregs GSM258777 CEL  
70-T-cells-CD8+ GSM258776 CEL  
69-T-cells-CD8+ GSM258774 CEL  
68-T-cells-CD4+ GSM258773 CEL  
67-T-cells-CD4+ GSM258773 CEL  
66-Thymocyte-DN GSM465595 CEL  
65-Osteoclasts GSM258743 CEL  
64-Osteoclasts GSM258743 CEL  
63-Microglia GSM258721 CEL  
62-Microglia GSM258721 CEL  
61-MM-LPS-7h GSM258706 CEL  
60-MM-LPS-7h GSM258706 CEL  
59-MM-LPS-6h GSM258702 CEL  
58-MM-LPS-6h GSM258702 CEL  
57-MM-LPS-6h GSM258699 CEL  
56-MM-LPS-6h GSM258699 CEL  
55-MM-LPS-6h GSM258694 CEL  
54-MM-LPS-6h GSM258694 CEL  
53-Ismacryoid-DC GSM258650 CEL  
52-Ismacryoid-DC GSM258649 CEL  
51-CD8a-DC GSM258648 CEL  
50-CD8a-DC GSM258647 CEL  
49-CD8a+DC GSM258646 CEL  
48-CD8a+DC GSM258646 CEL  
47-NK-cells GSM258732 CEL  
46-NK-cells GSM258731 CEL  
45-Mast-cells-IgE+Ad GSM258718 CEL  
44-Mast-cells-IgE+Ad GSM258717 CEL  
43-Mast-cells-IgE GSM258714 CEL  
42-Mast-cells-IgE GSM258713 CEL  
41-Mast-cells GSM258712 CEL  
40-Granulocytes GSM258667 CEL  
39-Granulocytes GSM258667 CEL  
38-GMP GSM258666 CEL  
37-GMP GSM258666 CEL  
36-GMP GSM258665 CEL  
35-GMP GSM258664 CEL  
34-MPEP GSM258642 CEL  
33-MPEP GSM258641 CEL  
32-MPEP GSM258641 CEL  
31-HESC GSM258770 CEL  
30-HESC GSM258770 CEL  
29-Bone marrow GSM258628 CEL  
28-Bone marrow GSM258627 CEL  
27-paneth-cells-GF-1 GSM116357 CEL  
26-paneth-cells-GF-1 GSM116358 CEL  
25-paneth-cells GSM116350 CEL  
24-paneth-cells GSM116359 CEL  
23-paneth-cells GSM318589 CEL  
22-paneth-cells GSM318590 CEL  
21-paneth-cells GSM480375 cel  
20-paneth-cells GSM480374 cel  
19-paneth-cells GSM480373 cel  
18-paneth-cells GSM480373 cel  
17-paneth-cells GSM480373 cel  
16-paneth-cells GSM480373 cel  
15-paneth-cells GSM349880 CEL  
14-paneth-cells GSM350376 CEL  
13-paneth-cells GSM350375 CEL  
13-paneth-cells GSM350375 CEL  
12-paneth-cells GSM350375 CEL  
12-paneth-cells GSM350375 CEL  
11-paneth-cells GSM350375 CEL  
11-paneth-cells GSM350375 CEL  
10-paneth-cells GSM350375 CEL  
10-paneth-cells GSM350375 CEL  
9-paneth-cells GSM350375 CEL  
9-paneth-cells GSM350375 CEL  
8-paneth-cells GSM350375 CEL  
8-paneth-cells GSM350375 CEL  
7-paneth-cells GSM350375 CEL  
7-paneth-cells GSM350375 CEL  
6-paneth-cells GSM350375 CEL  
6-paneth-cells GSM350375 CEL  
5-paneth-cells GSM350375 CEL  
5-paneth-cells GSM350375 CEL  
4-paneth-cells GSM350375 CEL  
4-paneth-cells GSM350375 CEL  
3-paneth-cells GSM350375 CEL  
3-paneth-cells GSM350375 CEL  
2-paneth-cells GSM350375 CEL  
2-paneth-cells GSM350375 CEL  
1-paneth-cells GSM350375 CEL  
1-paneth-cells GSM350375 CEL  
0-paneth-cells GSM350375 CEL  
0-paneth-cells GSM350375 CEL



Cluster0151-Intestine-related (12 nodes)

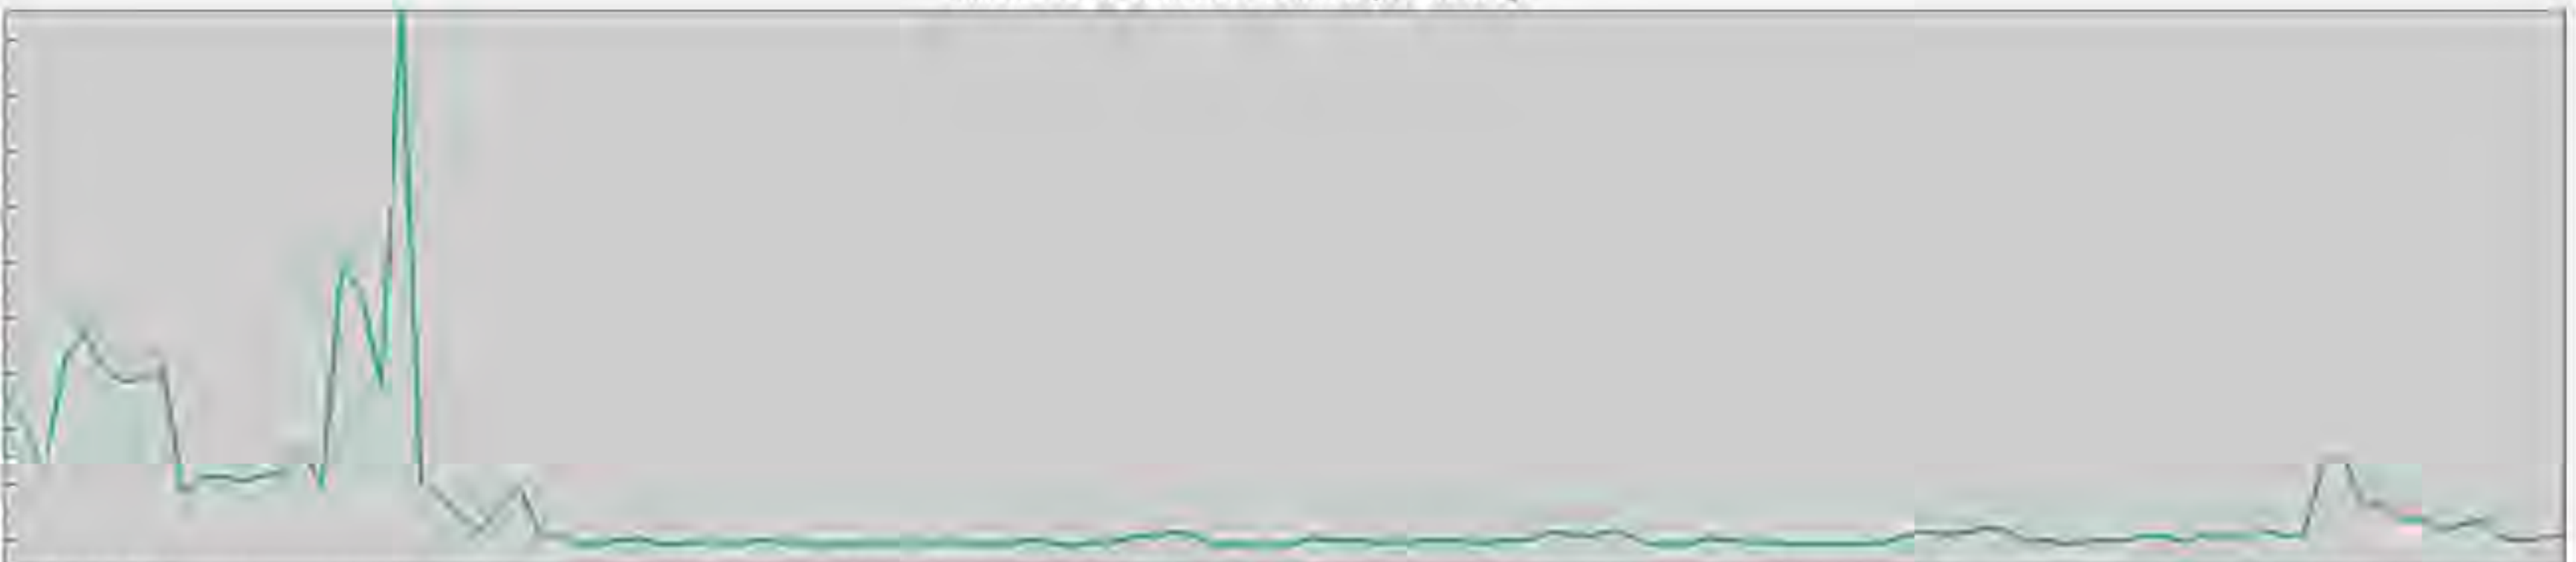

|                               |              |      |
|-------------------------------|--------------|------|
| 01-PP-M-cells                 | GSM190789    | CEL  |
| 02-PP-M-cells                 | GSM190790    | CEL  |
| 03-PP-M-cells                 | GSM190791    | CEL  |
| 04-CT-y-M-cells               | GSM190792    | CEL  |
| 05-CT-y-M-cells               | GSM190793    | CEL  |
| 06-CT-w-M-cells               | GSM190794    | CEL  |
| 07-Ileum-EC                   | GSM190795    | CEL  |
| 08-Ileum-EC                   | GSM190796    | CEL  |
| 09-Ileum-EC                   | GSM190797    | CEL  |
| 10-FAE-RMP                    | GSM190798    | CEL  |
| 11-FAE-RMP                    | GSM190799    | CEL  |
| 12-Small-intestine-epithelium | RMINEP001001 | CEL  |
| 13-Small-intestine-epithelium | RMINEP002001 | CEL  |
| 14-Ileum-EC                   | GSM350371    | CEL  |
| 15-Ileum-EC                   | GSM350375    | CEL  |
| 16-Colon-EC                   | GSM349880    | CEL  |
| 17-Colon-Vill                 | GSM480362    | cel  |
| 18-Colon-Vill                 | GSM480363    | cel  |
| 19-Colon-Crypt                | GSM480374    | cel  |
| 20-Colon-Crypt                | GSM480375    | cel  |
| 21-Colon-Crypt                | GSM480375    | cel  |
| 22-Paneth-cells               | GSM318590    | CEL  |
| 23-Paneth-cells               | GSM318591    | CEL  |
| 24-Paneth-cells               | GSM116350    | CEL  |
| 25-Paneth-cells               | GSM116359    | CEL  |
| 26-Paneth-cells               | GSM116359    | CEL  |
| 27-Paneth-cells               | GSM116357    | CEL  |
| 28-Bone marrow                | GSM258627    | CEL  |
| 29-Bone marrow                | GSM258628    | CEL  |
| 30-NALT                       | GSM289411    | CELL |
| 31-NALT                       | GSM289410    | CELL |
| 32-NALT                       | GSM289409    | CELL |
| 33-NALT                       | GSM289408    | CELL |
| 34-Colon-d9                   | GSM198810    | CELL |
| 35-Colon-d9                   | GSM198810    | CELL |
| 36-Colon-d4                   | GSM198810    | CELL |
| 37-Colon-d4                   | GSM198810    | CELL |
| 38-Colon-d4                   | GSM198810    | CELL |
| 39-Colon-d4                   | GSM198810    | CELL |
| 40-Intestine-large            | GSM258675    | CEL  |
| 41-Intestine-large            | GSM258677    | CEL  |
| 42-Intestine-small            | GSM258677    | CEL  |
| 43-Intestine-small            | GSM258691    | CEL  |
| 44-Lymph-nodes                | GSM258676    | CEL  |
| 45-Spleen                     | GSM258676    | CEL  |
| 46-Spleen                     | GSM258676    | CEL  |
| 47-Neuro2a                    | GSM241898    | CEL  |
| 48-Neuro2a                    | GSM241898    | CEL  |
| 49-Astrocytes                 | GSM241898    | CEL  |
| 50-mimb                       | GSM258725    | CEL  |
| 51-mimb                       | GSM258725    | CEL  |
| 52-MIMCD3                     | GSM258723    | CEL  |
| 53-MIMCD3                     | GSM258723    | CEL  |
| 54-Bruce4                     | GSM258690    | CEL  |
| 55-Bruce4                     | GSM258690    | CEL  |
| 56-C2C12                      | GSM258629    | CEL  |
| 57-NH3T3                      | GSM258730    | CEL  |
| 58-NH3T3                      | GSM258729    | CEL  |
| 59-3T3-L1                     | GSM258610    | CEL  |
| 60-3T3-L1                     | GSM258609    | CEL  |
| 61-10T12                      | GSM258631    | CEL  |
| 62-10T12                      | GSM258631    | CEL  |
| 63-Osteoblast-d21             | GSM258740    | CEL  |
| 64-Osteoblast-d21             | GSM258739    | CEL  |
| 65-Osteoblast-d14             | GSM258738    | CEL  |
| 66-Osteoblast-d14             | GSM258737    | CEL  |
| 67-Osteoblast-d5              | GSM258742    | CEL  |
| 68-Osteoblast-d5              | GSM258741    | CEL  |
| 69-Chondrocytes               | GSM266741    | CEL  |
| 70-Chondrocytes               | GSM266740    | CEL  |
| 71-Nat Helper cell            | GSM465594    | CEL  |
| 72-Nat Helper cell            | GSM465593    | CEL  |
| 73-LT cell                    | GSM465596    | CEL  |
| 74-MS-1                       | GSM234692    | CEL  |
| 75-Lymph-endo-cells           | GSM143704    | CEL  |
| 76-Lymph-endo-cells           | GSM481977    | CEL  |
| 77-Lymph-endo-cells           | GSM481978    | CEL  |
| 78-Lymph-endo-cells           | GSM481978    | CEL  |
| 79-Follicular-B-cells         | GSM258622    | CEL  |
| 80-Follicular-B-cells         | GSM258622    | CEL  |
| 81-MZ-Bcell                   | GSM258621    | CEL  |
| 82-MZ-Bcell                   | GSM258621    | CEL  |
| 83-BAF3                       | GSM258620    | CEL  |
| 84-BAF3                       | GSM258619    | CEL  |
| 85-Tregs                      | GSM258778    | CEL  |
| 86-Tregs                      | GSM258778    | CEL  |
| 87-T-cells-CD8+               | GSM258777    | CEL  |
| 88-T-cells-CD8+               | GSM258776    | CEL  |
| 89-T-cells-CD4+               | GSM258774    | CEL  |
| 90-T-cells-CD4+               | GSM258773    | CEL  |
| 91-Thymocyte-DN               | GSM465595    | CEL  |
| 92-Osteoclasts                | GSM258743    | CEL  |
| 93-Osteoclasts                | GSM258743    | CEL  |
| 94-Microglia                  | GSM258721    | CEL  |
| 95-Microglia                  | GSM258721    | CEL  |
| 96-MM-LPS-7h                  | GSM258706    | CEL  |
| 97-MM-LPS-7h                  | GSM258706    | CEL  |
| 98-MM-LPS-6h                  | GSM258702    | CEL  |
| 99-MM-LPS-6h                  | GSM258702    | CEL  |
| 100-MM-LPS-6h                 | GSM258699    | CEL  |
| 101-MM-LPS-6h                 | GSM258699    | CEL  |
| 102-MM-LPS-6h                 | GSM258694    | CEL  |
| 103-MM-LPS-6h                 | GSM258694    | CEL  |
| 104-MM-LPS-6h                 | GSM258694    | CEL  |
| 105-MM-LPS-6h                 | GSM258694    | CEL  |
| 106-MM-LPS-6h                 | GSM258694    | CEL  |
| 107-MM-LPS-6h                 | GSM258694    | CEL  |
| 108-MM-LPS-6h                 | GSM258694    | CEL  |
| 109-MM-LPS-6h                 | GSM258694    | CEL  |
| 110-MM-LPS-6h                 | GSM258694    | CEL  |
| 111-MM-LPS-6h                 | GSM258694    | CEL  |
| 112-MM-LPS-6h                 | GSM258694    | CEL  |
| 113-MM-LPS-6h                 | GSM258694    | CEL  |
| 114-MM-LPS-6h                 | GSM258694    | CEL  |
| 115-MM-LPS-6h                 | GSM258694    | CEL  |
| 116-MM-LPS-6h                 | GSM258694    | CEL  |
| 117-MM-LPS-6h                 | GSM258694    | CEL  |
| 118-MM-LPS-6h                 | GSM258694    | CEL  |
| 119-MM-LPS-6h                 | GSM258694    | CEL  |
| 120-MM-LPS-6h                 | GSM258694    | CEL  |
| 121-MM-LPS-6h                 | GSM258694    | CEL  |
| 122-MM-LPS-6h                 | GSM258694    | CEL  |
| 123-MM-LPS-6h                 | GSM258694    | CEL  |
| 124-MM-LPS-6h                 | GSM258694    | CEL  |
| 125-MM-LPS-6h                 | GSM258694    | CEL  |
| 126-MM-LPS-6h                 | GSM258694    | CEL  |
| 127-MM-LPS-6h                 | GSM258694    | CEL  |
| 128-MM-LPS-6h                 | GSM258694    | CEL  |
| 129-MM-LPS-6h                 | GSM258694    | CEL  |
| 130-MM-LPS-6h                 | GSM258694    | CEL  |







Cluster0153\_High in Peyer's patches FDC (12 nodes)

1,274.9  
1,207.8  
1,140.7  
1,073.6  
1,006.5  
939.4  
872.3  
805.2  
738.1  
671  
603.9  
536.8  
469.7  
402.6  
335.5  
268.4  
201.3  
134.2  
67.1  
0

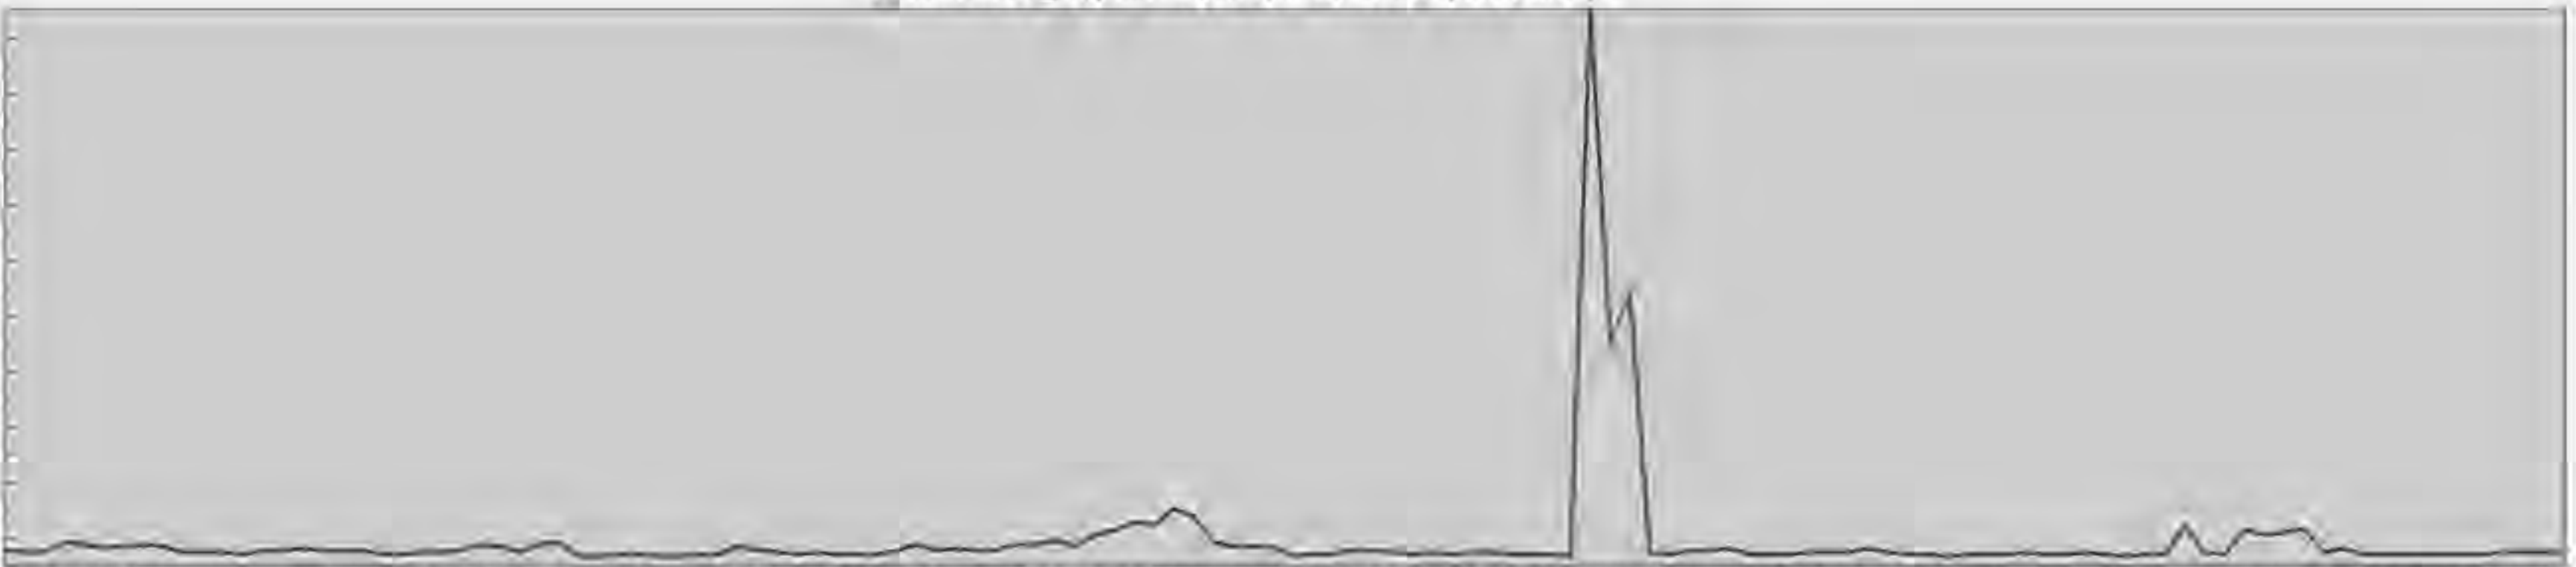

|                               |              |     |
|-------------------------------|--------------|-----|
| 01-PP-M-cells                 | GSM190789    | CEL |
| 02-PP-M-cells                 | GSM190790    | CEL |
| 03-PP-M-cells                 | GSM190791    | CEL |
| 04-CT-Y-M-cells               | GSM190792    | CEL |
| 05-CT-Y-M-cells               | GSM190793    | CEL |
| 06-CT-W-M-cells               | GSM190794    | CEL |
| 07-Ileum-IEC                  | GSM190795    | CEL |
| 08-Ileum-IEC                  | GSM190796    | CEL |
| 09-Ileum-IEC                  | GSM190797    | CEL |
| 10-FAE-RMP                    | GSM190798    | CEL |
| 11-FAE-RMP                    | GSM190799    | CEL |
| 12-Small-intestine-epithelium | RMINEP001001 | CEL |
| 13-Small-intestine-epithelium | RMINEP002001 | CEL |
| 14-Ileum-IEC                  | GSM350371    | CEL |
| 15-Ileum-IEC                  | GSM350375    | CEL |
| 16-Colon-IEC                  | GSM349880    | CEL |
| 17-Colon-Vill                 | GSM480362    | cel |
| 18-Colon-Vill                 | GSM480363    | cel |
| 19-Colon-Crypt                | GSM480374    | cel |
| 20-Colon-Crypt                | GSM480375    | cel |
| 21-Colon-Crypt                | GSM480375    | cel |
| 22-Paneth-cells               | GSM318589    | CEL |
| 23-Paneth-cells               | GSM318590    | CEL |
| 24-Paneth-cells               | GSM116350    | CEL |
| 25-Paneth-cells               | GSM116359    | CEL |
| 26-Paneth-cells               | GSM116359    | CEL |
| 27-Paneth-cells               | GSM116357    | CEL |
| 28-Bone marrow                | GSM258627    | CEL |
| 29-Bone marrow                | GSM258627    | CEL |
| 30-NALT                       | GSM289411    | CEL |
| 31-NALT                       | GSM289410    | CEL |
| 32-NALT                       | GSM289409    | CEL |
| 33-NALT                       | GSM289408    | CEL |
| 34-Color-d9                   | GSM198810    | CEL |
| 35-Color-d9                   | GSM198810    | CEL |
| 36-Color-d4                   | GSM198810    | CEL |
| 37-Color-d4                   | GSM198810    | CEL |
| 38-Color-d4                   | GSM198810    | CEL |
| 39-Color-d4                   | GSM198810    | CEL |
| 40-Intestine-large            | GSM258675    | CEL |
| 41-Intestine-large            | GSM258675    | CEL |
| 42-Intestine-small            | GSM258677    | CEL |
| 43-Intestine-small            | GSM258679    | CEL |
| 44-Lymph-nodes                | GSM258691    | CEL |
| 45-Spleen                     | GSM258766    | CEL |
| 46-Spleen                     | GSM258767    | CEL |
| 47-Neuro2a                    | GSM258728    | CEL |
| 48-Neuro2a                    | GSM258728    | CEL |
| 49-Astrocytes                 | GSM241898    | CEL |
| 50-mimb                       | GSM258726    | CEL |
| 51-mimb                       | GSM258725    | CEL |
| 52-MIMCD3                     | GSM258724    | CEL |
| 53-MIMCD3                     | GSM258723    | CEL |
| 54-Bruce4                     | GSM258656    | CEL |
| 55-Bruce4                     | GSM258656    | CEL |
| 56-C2C12                      | GSM258690    | CEL |
| 57-C2C12                      | GSM258689    | CEL |
| 58-NH3T3                      | GSM258730    | CEL |
| 59-NH3T3                      | GSM258729    | CEL |
| 60-3T3-L1                     | GSM258610    | CEL |
| 61-3T3-L1                     | GSM258609    | CEL |
| 62-10T12                      | GSM258632    | CEL |
| 63-10T12                      | GSM258631    | CEL |
| 64-Osteoblast-d21             | GSM258740    | CEL |
| 65-Osteoblast-d21             | GSM258739    | CEL |
| 66-Osteoblast-d14             | GSM258738    | CEL |
| 67-Osteoblast-d14             | GSM258737    | CEL |
| 68-Osteoblast-d5              | GSM258742    | CEL |
| 69-Osteoblast-d5              | GSM258741    | CEL |
| 70-Chondrocytes               | GSM266741    | CEL |
| 71-Chondrocytes               | GSM266740    | CEL |
| 72-Nat Helper cell            | GSM465594    | CEL |
| 73-Nat Helper cell            | GSM465593    | CEL |
| 74-LT cell                    | GSM465596    | CEL |
| 75-MS-1                       | GSM234692    | CEL |
| 76-Lymph-endc-cells           | GSM143704    | CEL |
| 77-PP-FDC                     | GSM481977    | CEL |
| 78-PP-FDC                     | GSM481978    | CEL |
| 79-PP-FDC                     | GSM481976    | CEL |
| 80-LY-RMLNDC002001            | CEL          |     |
| 81-LY-RMLNDC003001            | CEL          |     |
| 82-LY-RMLNDC002001            | CEL          |     |
| 83-Tregs                      | GSM258778    | CEL |
| 84-Tregs                      | GSM258777    | CEL |
| 85-T-cells-CD8+               | GSM258776    | CEL |
| 86-T-cells-CD8+               | GSM258775    | CEL |
| 87-T-cells-CD4+               | GSM258774    | CEL |
| 88-T-cells-CD4+               | GSM258773    | CEL |
| 89-Thymocyte-DN               | GSM465595    | CEL |
| 90-Osteoclasts                | GSM258743    | CEL |
| 91-Microglia                  | GSM258721    | CEL |
| 92-Microglia                  | GSM258721    | CEL |
| 93-MM-PS-7h                   | GSM258705    | CEL |
| 94-MM-PS-7h                   | GSM258705    | CEL |
| 95-MM-PS-6h                   | GSM258702    | CEL |
| 96-MM-PS-6h                   | GSM258702    | CEL |
| 97-MM-LPS-6h                  | GSM258699    | CEL |
| 98-MM-LPS-6h                  | GSM258699    | CEL |
| 99-MM-LPS-6h                  | GSM258694    | CEL |
| 100-MM-LPS-6h                 | GSM258694    | CEL |
| 101-Ismacryoid-DC             | GSM258650    | CEL |
| 102-Ismacryoid-DC             | GSM258649    | CEL |
| 103-CD8a-DC                   | GSM258647    | CEL |
| 104-CD8a-DC                   | GSM258647    | CEL |
| 105-CD8a+DC                   | GSM258646    | CEL |
| 106-CD8a+DC                   | GSM258646    | CEL |
| 107-NK-cells                  | GSM258732    | CEL |
| 108-NK-cells                  | GSM258731    | CEL |
| 109-Mast-cells-IgE+Ad         | GSM258718    | CEL |
| 110-Mast-cells-IgE+Ad         | GSM258717    | CEL |
| 111-Mast-cells-IgE            | GSM258714    | CEL |
| 112-Mast-cells-IgE            | GSM258713    | CEL |
| 113-Granulocytes              | GSM258667    | CEL |
| 114-Granulocytes              | GSM258667    | CEL |
| 115-GMP                       | GSM258665    | CEL |
| 116-GMP                       | GSM258665    | CEL |
| 117-GMP                       | GSM258642    | CEL |
| 118-GMP                       | GSM258642    | CEL |
| 119-MPEP                      | GSM258720    | CEL |
| 120-MPEP                      | GSM258719    | CEL |
| 121-HESC                      | GSM258770    | CEL |
| 122-HESC                      | GSM258770    | CEL |
| 123-Bone marrow               | GSM258628    | CEL |
| 124-Bone marrow               | GSM258627    | CEL |
| 125-Paneth-cells              | GSM116358    | CEL |
| 126-Paneth-cells              | GSM116357    | CEL |
| 127-Paneth-cells              | GSM116350    | CEL |
| 128-Paneth-cells              | GSM116359    | CEL |
| 129-Paneth-cells              | GSM318589    | CEL |
| 130-Paneth-cells              | GSM318590    | CEL |



Cluster0154\_Phagocyte-related (12 nodes)

2,380.3  
2,255  
2,129.7  
2,004.4  
1,879.2  
1,753.9  
1,628.6  
1,503.3  
1,378.1  
1,252.8  
1,127.5  
1,002.2  
876.9  
751.7  
626.4  
501.1  
375.8  
250.6  
125.3  
0

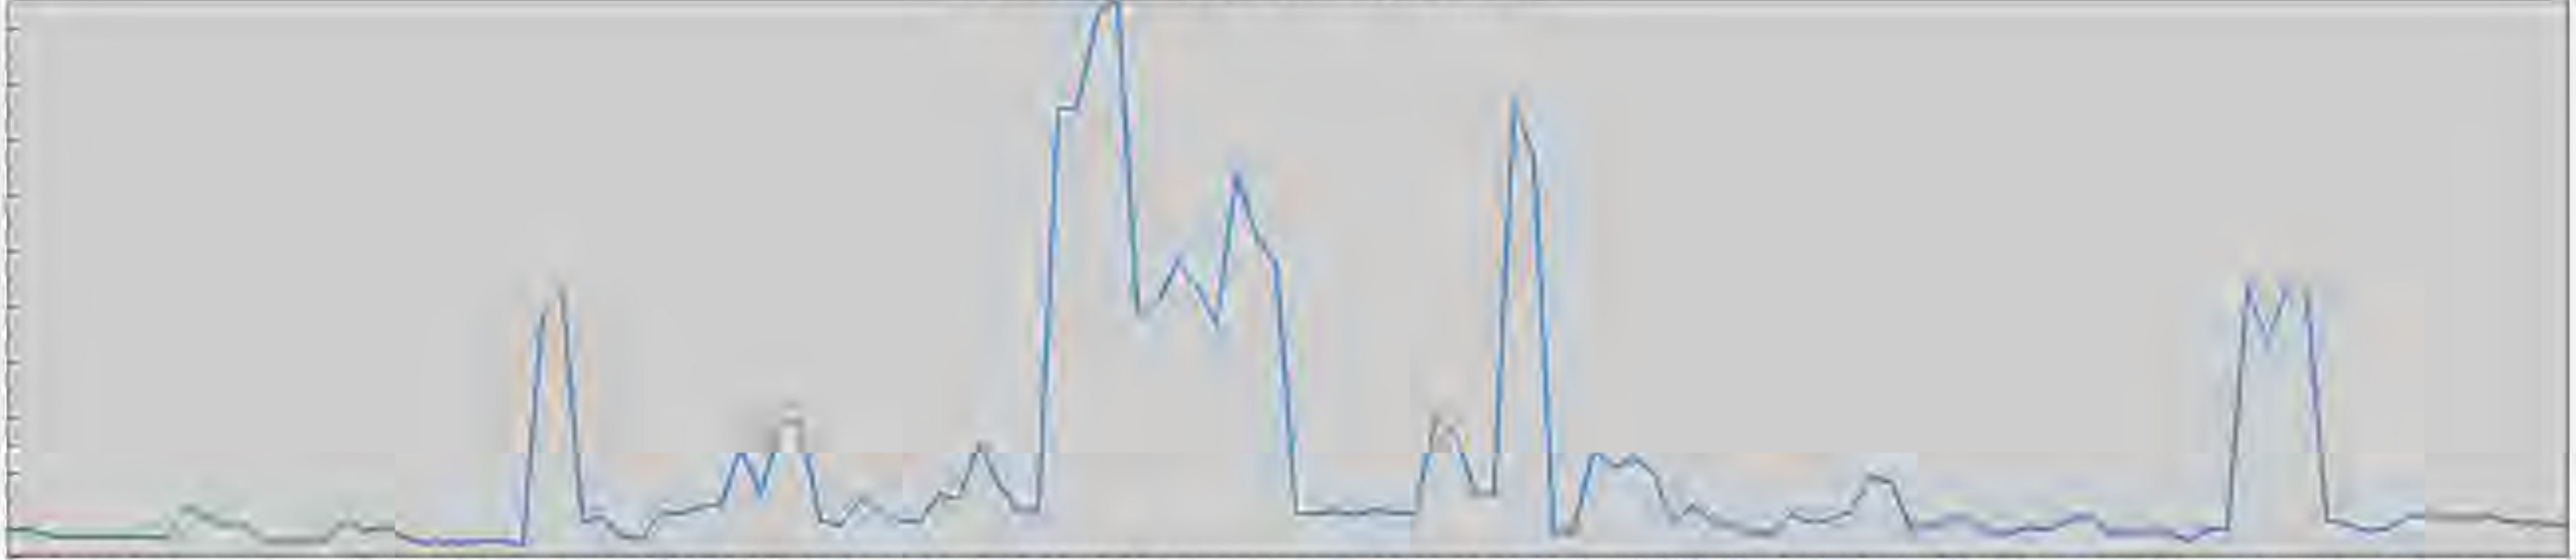

130-NALT GSM289411.CEL  
129-NALT GSM289410.CEL  
128-NALT GSM289409.CEL  
127-NALT GSM289408.CEL  
126-CD9 GSM1988105.CEL  
125-CD9 GSM1988104.CEL  
124-CD9 GSM1988103.CEL  
123-CD9 GSM1988102.CEL  
122-CD9 GSM1988101.CEL  
121-Intestine-large GSM258676.CEL  
120-Intestine-large GSM258675.CEL  
119-Intestine-small GSM258678.CEL  
118-Intestine-small GSM258692.CEL  
117-Lymph-nodes GSM258691.CEL  
116-Lymph-nodes GSM258726.CEL  
115-Spleen GSM258768.CEL  
114-Spleen GSM258767.CEL  
113-Neuro2a GSM258728.CEL  
112-Neuro2a GSM258727.CEL  
111-Astrocytes GSM241898.CEL  
110-ming GSM258725.CEL  
109-ming GSM258724.CEL  
108-MIMCD3 GSM258723.CEL  
107-MIMCD3 GSM258722.CEL  
106-Bruce4 GSM258656.CEL  
105-Bruce4 GSM258655.CEL  
104-C2C12 GSM258690.CEL  
103-C2C12 GSM258629.CEL  
102-NH3T3 GSM258739.CEL  
101-NH3T3 GSM258738.CEL  
100-3T3-L1 GSM258610.CEL  
99-3T3-L1 GSM258609.CEL  
98-10T12 GSM258632.CEL  
97-10T12 GSM258631.CEL  
96-Osteoblast-d21 GSM258740.CEL  
95-Osteoblast-d21 GSM258739.CEL  
94-Osteoblast-d14 GSM258738.CEL  
93-Osteoblast-d14 GSM258737.CEL  
92-Osteoblast-d5 GSM258742.CEL  
91-Osteoblast-d5 GSM258741.CEL  
90-Chondrocytes GSM266741.CEL  
89-Chondrocytes GSM266740.CEL  
88-Nat Helper cell GSM465594.CEL  
87-Nat Helper cell GSM465593.CEL  
86-TT cell GSM465596.CEL  
85-MS-1 GSM234692.CEL  
84-Lymph-endc-cells GSM143704.CEL  
83-PP-FDC GSM481977.CEL  
82-PP-FDC GSM481978.CEL  
81-PP-FDC GSM481976.CEL  
80-D-LY RMLNDCC003001.CEL  
79-E-LY RMLNDCC003001.CEL  
78-Follicular-Bcells GSM258664.CEL  
77-Follicular-Bcells GSM258622.CEL  
76-MZ-Bcell GSM258621.CEL  
75-MZ-Bcell GSM258621.CEL  
74-BAF3 GSM258620.CEL  
73-BAF3 GSM258619.CEL  
72-Tregs GSM258778.CEL  
71-Tregs GSM258777.CEL  
70-T-cells-CD8+ GSM258776.CEL  
69-T-cells-CD8+ GSM258775.CEL  
68-T-cells-CD4+ GSM258774.CEL  
67-T-cells-CD4+ GSM258773.CEL  
66-Thymocyte-DN GSM465595.CEL  
65-Osteoclasts GSM258744.CEL  
64-Osteoclasts GSM258743.CEL  
63-Microglia GSM258721.CEL  
62-Microglia GSM258721.CEL  
61-PM-M-PS-7h GSM258706.CEL  
60-PM-M-PS-7h GSM258705.CEL  
59-PM-M-PS-6h GSM258702.CEL  
58-PM-M-PS-6h GSM258701.CEL  
57-BMM-LPS-6h GSM258699.CEL  
56-BMM-LPS-6h GSM258699.CEL  
55-BMM-LPS-6h GSM258699.CEL  
54-BMM-LPS-6h GSM258699.CEL  
53-Plasmacytoid-DC GSM258650.CEL  
52-Plasmacytoid-DC GSM258649.CEL  
51-CD8a-DC GSM258648.CEL  
50-CD8a-DC GSM258647.CEL  
49-CD8a+DC GSM258646.CEL  
48-CD8a+DC GSM258645.CEL  
47-NK-cells GSM258732.CEL  
46-NK-cells GSM258731.CEL  
45-Mast-cells-IgE+Ad GSM258718.CEL  
44-Mast-cells-IgE+Ad GSM258717.CEL  
43-Mast-cells-IgE GSM258714.CEL  
42-Mast-cells-IgE GSM258713.CEL  
41-Mast-cells GSM258712.CEL  
40-Granulocytes GSM258668.CEL  
39-Granulocytes GSM258667.CEL  
38-GMP GSM258666.CEL  
37-GMP GSM258665.CEL  
36-GMP GSM258664.CEL  
35-CMP GSM258642.CEL  
34-CMP GSM258641.CEL  
33-MEP GSM258720.CEL  
32-MEP GSM258719.CEL  
31-HSC GSM258770.CEL  
30-HSC GSM258769.CEL  
29-Bone marrow GSM258628.CEL  
28-Bone marrow GSM258627.CEL  
27-paneth-cells-GE GSM116358.CEL  
26-paneth-cells-GE GSM116357.CEL  
25-paneth-cells GSM116350.CEL  
24-paneth-cells GSM116359.CEL  
23-paneth-cells GSM318589.CEL  
22-paneth-cells GSM318590.CEL  
21-CD9 GSM480375.CEL  
20-CD9 GSM480374.CEL  
19-CD9 GSM480363.CEL  
18-CD9 GSM480362.CEL  
17-CD9 GSM349880.CEL  
16-CD9 GSM350375.CEL  
15-CD9 GSM350376.CEL  
14-Intestine-epithelium RMINEP002901.CEL  
13-Intestine-epithelium RMINEP002901.CEL  
12-Intestine-epithelium RMINEP001001.CEL  
11-FAE RMPYEP002001.CEL  
10-FAE RMPYEP001001.CEL  
09-Ileum-IEC GSM190797.CEL  
08-Ileum-IEC GSM190796.CEL  
07-Ileum-IEC GSM190795.CEL  
06-CT-v-M-cells GSM190794.CEL  
05-CT-v-M-cells GSM190793.CEL  
04-PP-M-cells GSM190792.CEL  
03-PP-M-cells GSM190791.CEL  
02-PP-M-cells GSM190790.CEL  
01-PP-M-cells GSM190789.CEL



Cluster0155\_Mesenchyme-related/extracellular matrix (12 nodes)

565.2  
535.5  
505.7  
476  
446.2  
416.5  
386.7  
357  
327.2  
297.5  
267.7  
238  
208.2  
178.5  
148.7  
119  
89.2  
59.5  
29.7  
0

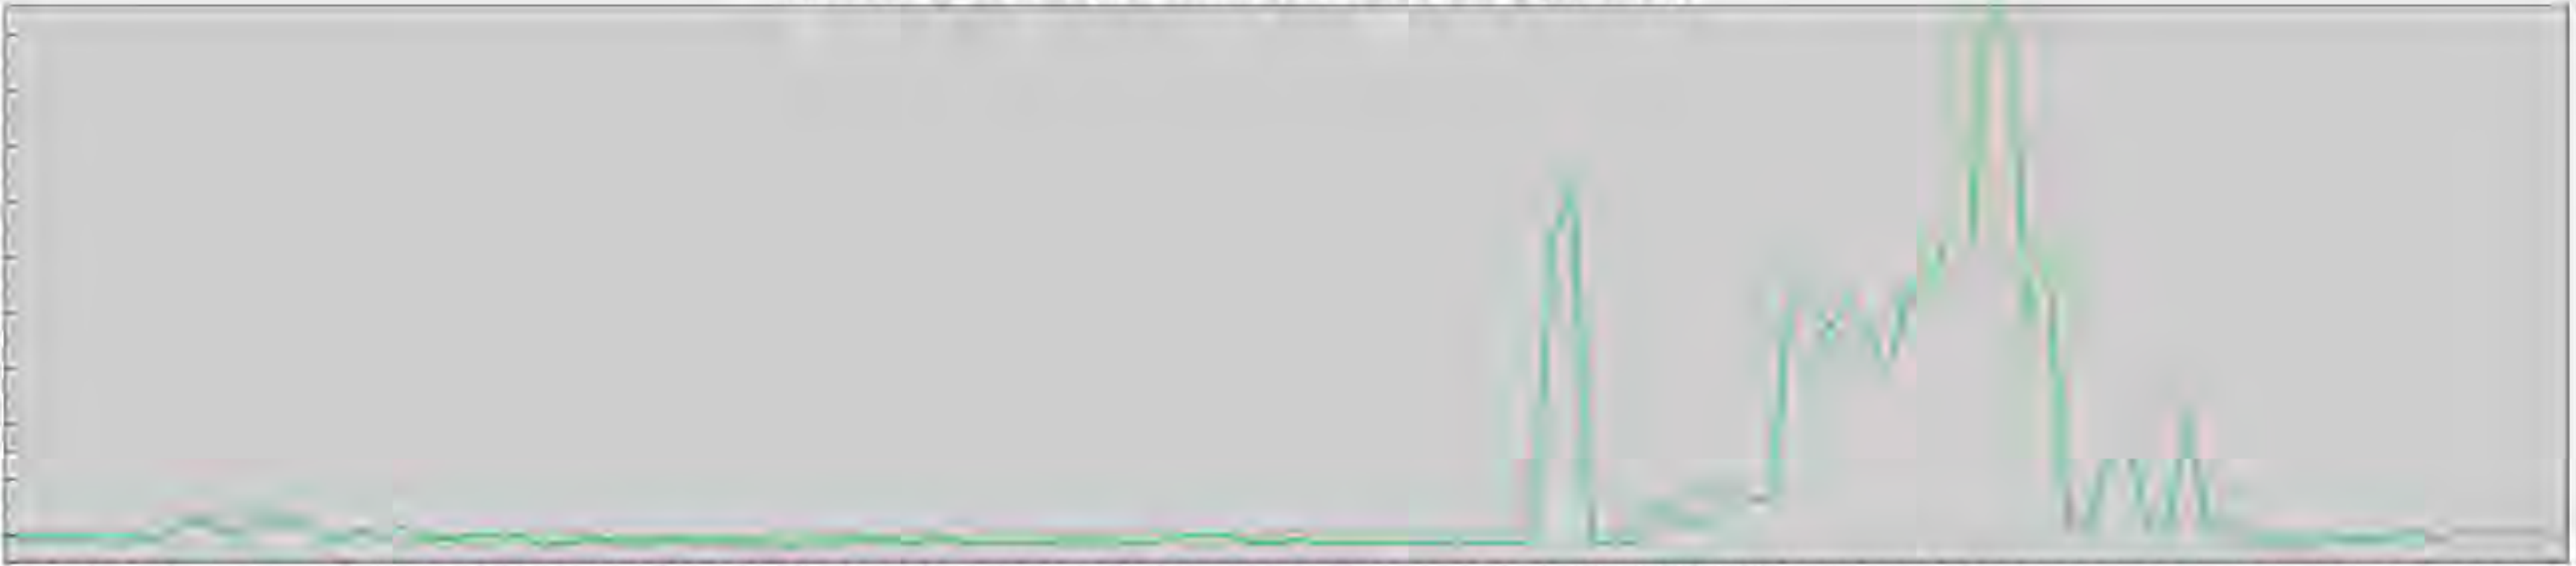

130- NALT GSM289411 CELL  
129- NALT GSM289410 CELL  
128- NALT GSM289409 CELL  
127- NALT GSM289408 CELL  
126- Colon-d9 GSM1988105 CELL  
125- Colon-d9 GSM1988104 CELL  
124- Colon-d9 GSM1988103 CELL  
123- Colon-d4 GSM1988102 CELL  
122- Colon-d4 GSM1988101 CELL  
121- Intestine-large GSM258676 CELL  
120- Intestine-large GSM258675 CELL  
119- Intestine-small GSM258678 CELL  
118- Intestine-small GSM258679 CELL  
117- Lymph-nodes GSM258691 CELL  
116- Lymph-nodes GSM258726 CELL  
115- Spleen GSM258767 CELL  
114- Spleen GSM258767 CELL  
113- Neuro2a GSM258728 CELL  
112- Neuro2a GSM258727 CELL  
111- Astrocytes GSM241898 CELL  
110- mimg GSM258726 CELL  
109- mimg GSM258725 CELL  
108- MIMCD3 GSM258724 CELL  
107- MIMCD3 GSM258723 CELL  
106- Bruce4 GSM258665 CELL  
105- Bruce4 GSM258665 CELL  
104- C2C12 GSM258690 CELL  
103- C2C12 GSM258689 CELL  
102- NIH3T3 GSM258730 CELL  
101- NIH3T3 GSM258729 CELL  
100- 3T3-L1 GSM258610 CELL  
99- 3T3-L1 GSM258609 CELL  
98- 10T1/2 GSM258632 CELL  
97- 10T1/2 GSM258631 CELL  
96- Osteoblast-d21 GSM258740 CELL  
95- Osteoblast-d21 GSM258739 CELL  
94- Osteoblast-d14 GSM258738 CELL  
93- Osteoblast-d14 GSM258737 CELL  
92- Osteoblast-d5 GSM258742 CELL  
91- Osteoblast-d5 GSM258741 CELL  
90- Chondrocytes GSM266741 CELL  
89- Chondrocytes GSM266740 CELL  
88- Nat Helper cell GSM465594 CELL  
87- Nat Helper cell GSM465593 CELL  
86- Tt cell GSM465596 CELL  
85- MS-1 GSM234692 CELL  
84- Lymph-endo-cells GSM143704 CELL  
83- P-FDC GSM481977 CELL  
82- P-FDC GSM481978 CELL  
81- P-FDC GSM481976 CELL  
80- FLY RMLNDCC003001 CELL  
79- FLY RMLNDCC003001 CELL  
78- Follicular-Bcells GSM258664 CELL  
77- Follicular-Bcells GSM258664 CELL  
76- MZ-Bcell GSM258627 CELL  
75- MZ-Bcell GSM258627 CELL  
74- BAF3 GSM258620 CELL  
73- BAF3 GSM258619 CELL  
72- Tregs GSM258778 CELL  
71- Tregs GSM258777 CELL  
70- T-cells CD8+ GSM258776 CELL  
69- T-cells CD8+ GSM258774 CELL  
68- T-cells CD4+ GSM258773 CELL  
67- T-cells CD4+ GSM258744 CELL  
66- Thymocyte-DN GSM465595 CELL  
65- Osteoclasts GSM258743 CELL  
64- Microglia GSM258721 CELL  
63- Microglia GSM258721 CELL  
62- PMM-LPS-7h GSM268706 CELL  
61- PMM-LPS-7h GSM268706 CELL  
60- PMM-LPS-7h GSM268705 CELL  
59- PMM-LPS-6h GSM258702 CELL  
58- PMM-LPS-6h GSM258702 CELL  
57- BMM-LPS-6h GSM258699 CELL  
56- BMM-LPS-6h GSM258699 CELL  
55- BMM-LPS-6h GSM258699 CELL  
54- BMM-LPS-6h GSM258699 CELL  
53- Plasmacytoid-DC GSM258650 CELL  
52- Plasmacytoid-DC GSM258649 CELL  
51- CD8a-DC GSM258647 CELL  
50- CD8a-DC GSM258647 CELL  
49- CD8a+DC GSM258646 CELL  
48- CD8a+DC GSM258646 CELL  
47- NK-cells GSM258732 CELL  
46- NK-cells GSM258731 CELL  
45- Mast-cells-IgE+Ad GSM258719 CELL  
44- Mast-cells-IgE+Ad GSM258717 CELL  
43- Mast-cells-IgE GSM258714 CELL  
42- Mast-cells-IgE GSM258713 CELL  
41- Mast-cells GSM258712 CELL  
40- Granulocytes GSM258668 CELL  
39- Granulocytes GSM258667 CELL  
38- GMP GSM258666 CELL  
37- GMP GSM258666 CELL  
36- GMP GSM258666 CELL  
35- CMP GSM258642 CELL  
34- CMP GSM258642 CELL  
33- MIEP GSM258720 CELL  
32- MIEP GSM258719 CELL  
31- HSC GSM258770 CELL  
30- HSC GSM258769 CELL  
29- Bone marrow GSM258628 CELL  
28- Bone marrow GSM258627 CELL  
27- Paneth-cells-GF-1 GSM116358 CELL  
26- Paneth-cells-GF-1 GSM116357 CELL  
25- Paneth-cells GSM116350 CELL  
24- Paneth-cells GSM116359 CELL  
23- Paneth-cells GSM318589 CELL  
22- Paneth-cells GSM318590 CELL  
21- Colon-Crypt GSM480375 CELL  
20- Colon-Crypt GSM480374 CELL  
19- Colon-Vill GSM480363 CELL  
18- Colon-Vill GSM480362 CELL  
17- Colon-IEC-GF GSM349880 CELL  
16- Colon-IEC-GF GSM350375 CELL  
15- Ileum-IEC-GF GSM350376 CELL  
14- Ileum-IEC GSM350371 CELL  
13- Small-intestine-epithelium RMINEP002001 CELL  
12- Small-intestine-epithelium RMINEP001001 CELL  
11- FAE-RMPYEP002001 CELL  
10- FAE-RMPYEP001001 CELL  
09- Ileum-IEC GSM190797 CELL  
08- Ileum-IEC GSM190796 CELL  
07- Ileum-IEC GSM190795 CELL  
06- CT-v-M-cells GSM190794 CELL  
05- CT-v-M-cells GSM190793 CELL  
04- PP-M-cells GSM190792 CELL  
03- PP-M-cells GSM190791 CELL  
02- PP-M-cells GSM190790 CELL  
01- PP-M-cells GSM190789 CELL



Cluster0156\_Low in Paneth cells (12 nodes)

104.3  
98.8  
93.3  
87.8  
82.3  
76.8  
71.3  
65.8  
60.4  
54.9  
49.4  
43.9  
38.4  
32.9  
27.4  
21.9  
16.5  
11  
5.5  
0

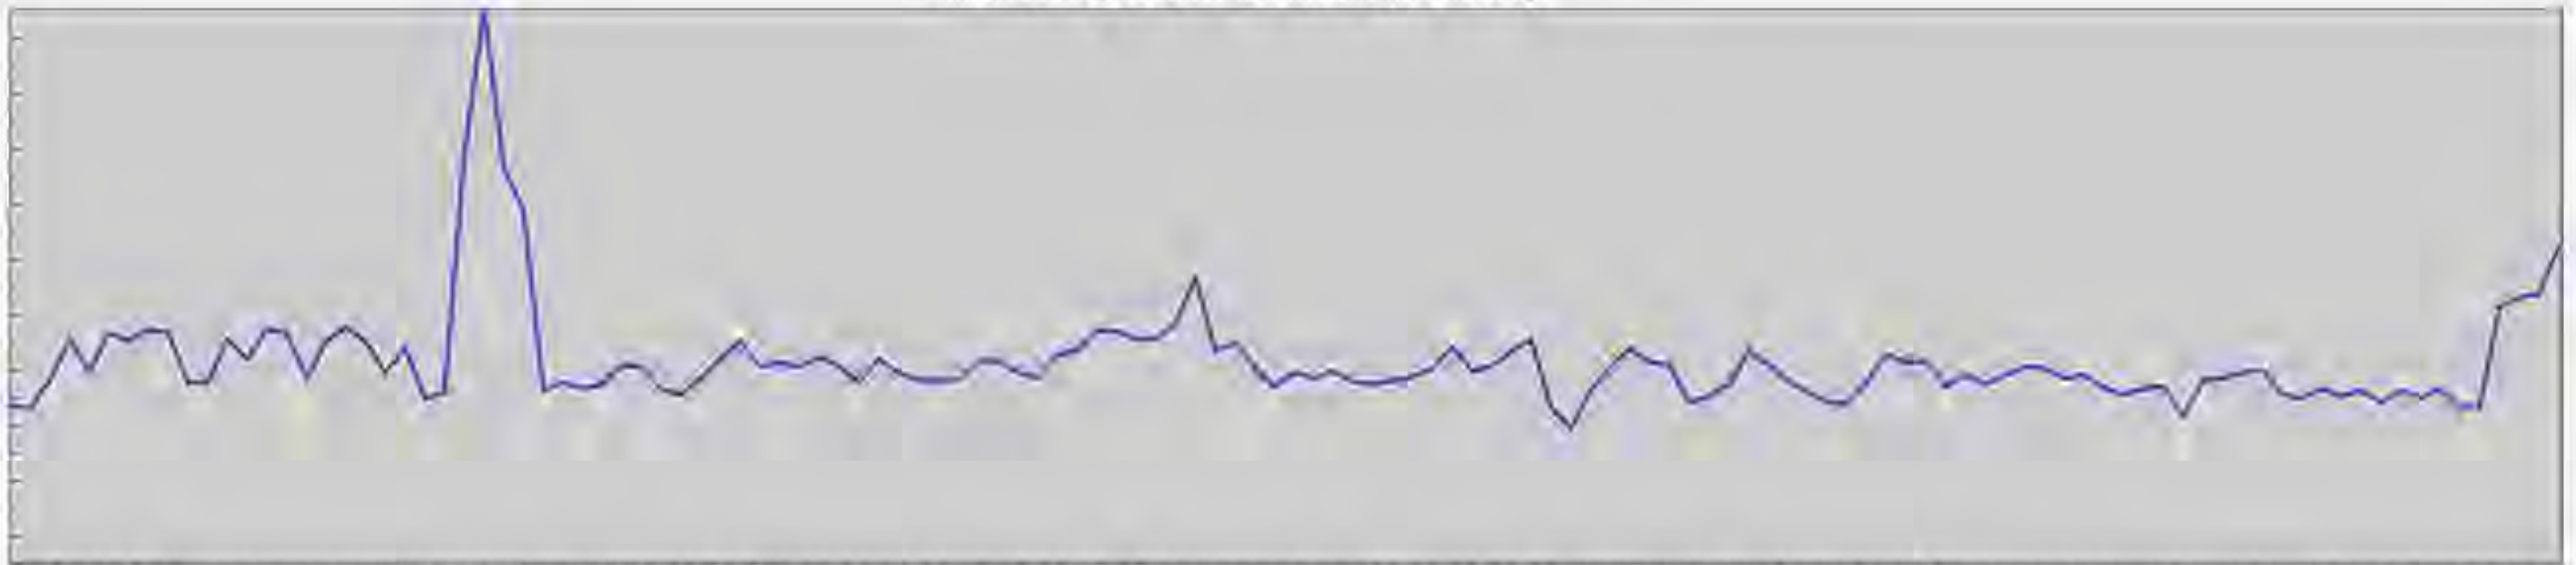

130-NALT GSM289411 CEL  
129-NALT GSM289410 CEL  
128-NALT GSM289409 CEL  
127-NALT GSM289408 CEL  
126-paneth-cells-GF-1 GSM116357 CEL  
125-paneth-cells GSM116350 CEL  
124-paneth-cells GSM116359 CEL  
123-paneth-cells GSM318589 CEL  
122-paneth-cells GSM318590 CEL  
121-paneth-cells GSM480375 cel  
120-paneth-cells GSM480374 cel  
119-paneth-cells-GF GSM116358 CEL  
118-paneth-cells-GF GSM116357 CEL  
117-paneth-cells-GF GSM116350 CEL  
116-paneth-cells-GF GSM116359 CEL  
115-paneth-cells-GF GSM318589 CEL  
114-paneth-cells-GF GSM318590 CEL  
113-paneth-cells-GF GSM480375 cel  
112-paneth-cells-GF GSM480374 cel  
111-paneth-cells-GF GSM116358 CEL  
110-paneth-cells-GF GSM116357 CEL  
109-paneth-cells-GF GSM116350 CEL  
108-paneth-cells-GF GSM116359 CEL  
107-paneth-cells-GF GSM318589 CEL  
106-paneth-cells-GF GSM318590 CEL  
105-paneth-cells-GF GSM480375 cel  
104-paneth-cells-GF GSM480374 cel  
103-paneth-cells-GF GSM116358 CEL  
102-paneth-cells-GF GSM116357 CEL  
101-paneth-cells-GF GSM116350 CEL  
100-paneth-cells-GF GSM116359 CEL  
99-paneth-cells-GF GSM318589 CEL  
98-paneth-cells-GF GSM318590 CEL  
97-paneth-cells-GF GSM480375 cel  
96-paneth-cells-GF GSM480374 cel  
95-paneth-cells-GF GSM116358 CEL  
94-paneth-cells-GF GSM116357 CEL  
93-paneth-cells-GF GSM116350 CEL  
92-paneth-cells-GF GSM116359 CEL  
91-paneth-cells-GF GSM318589 CEL  
90-paneth-cells-GF GSM318590 CEL  
89-paneth-cells-GF GSM480375 cel  
88-paneth-cells-GF GSM480374 cel  
87-paneth-cells-GF GSM116358 CEL  
86-paneth-cells-GF GSM116357 CEL  
85-paneth-cells-GF GSM116350 CEL  
84-paneth-cells-GF GSM116359 CEL  
83-paneth-cells-GF GSM318589 CEL  
82-paneth-cells-GF GSM318590 CEL  
81-paneth-cells-GF GSM480375 cel  
80-paneth-cells-GF GSM480374 cel  
79-paneth-cells-GF GSM116358 CEL  
78-paneth-cells-GF GSM116357 CEL  
77-paneth-cells-GF GSM116350 CEL  
76-paneth-cells-GF GSM116359 CEL  
75-paneth-cells-GF GSM318589 CEL  
74-paneth-cells-GF GSM318590 CEL  
73-paneth-cells-GF GSM480375 cel  
72-paneth-cells-GF GSM480374 cel  
71-paneth-cells-GF GSM116358 CEL  
70-paneth-cells-GF GSM116357 CEL  
69-paneth-cells-GF GSM116350 CEL  
68-paneth-cells-GF GSM116359 CEL  
67-paneth-cells-GF GSM318589 CEL  
66-paneth-cells-GF GSM318590 CEL  
65-paneth-cells-GF GSM480375 cel  
64-paneth-cells-GF GSM480374 cel  
63-paneth-cells-GF GSM116358 CEL  
62-paneth-cells-GF GSM116357 CEL  
61-paneth-cells-GF GSM116350 CEL  
60-paneth-cells-GF GSM116359 CEL  
59-paneth-cells-GF GSM318589 CEL  
58-paneth-cells-GF GSM318590 CEL  
57-paneth-cells-GF GSM480375 cel  
56-paneth-cells-GF GSM480374 cel  
55-paneth-cells-GF GSM116358 CEL  
54-paneth-cells-GF GSM116357 CEL  
53-paneth-cells-GF GSM116350 CEL  
52-paneth-cells-GF GSM116359 CEL  
51-paneth-cells-GF GSM318589 CEL  
50-paneth-cells-GF GSM318590 CEL  
49-paneth-cells-GF GSM480375 cel  
48-paneth-cells-GF GSM480374 cel  
47-paneth-cells-GF GSM116358 CEL  
46-paneth-cells-GF GSM116357 CEL  
45-paneth-cells-GF GSM116350 CEL  
44-paneth-cells-GF GSM116359 CEL  
43-paneth-cells-GF GSM318589 CEL  
42-paneth-cells-GF GSM318590 CEL  
41-paneth-cells-GF GSM480375 cel  
40-paneth-cells-GF GSM480374 cel  
39-paneth-cells-GF GSM116358 CEL  
38-paneth-cells-GF GSM116357 CEL  
37-paneth-cells-GF GSM116350 CEL  
36-paneth-cells-GF GSM116359 CEL  
35-paneth-cells-GF GSM318589 CEL  
34-paneth-cells-GF GSM318590 CEL  
33-paneth-cells-GF GSM480375 cel  
32-paneth-cells-GF GSM480374 cel  
31-paneth-cells-GF GSM116358 CEL  
30-paneth-cells-GF GSM116357 CEL  
29-paneth-cells-GF GSM116350 CEL  
28-paneth-cells-GF GSM116359 CEL  
27-paneth-cells-GF GSM318589 CEL  
26-paneth-cells-GF GSM318590 CEL  
25-paneth-cells-GF GSM480375 cel  
24-paneth-cells-GF GSM480374 cel  
23-paneth-cells-GF GSM116358 CEL  
22-paneth-cells-GF GSM116357 CEL  
21-paneth-cells-GF GSM116350 CEL  
20-paneth-cells-GF GSM116359 CEL  
19-paneth-cells-GF GSM318589 CEL  
18-paneth-cells-GF GSM318590 CEL  
17-paneth-cells-GF GSM480375 cel  
16-paneth-cells-GF GSM480374 cel  
15-paneth-cells-GF GSM116358 CEL  
14-paneth-cells-GF GSM116357 CEL  
13-paneth-cells-GF GSM116350 CEL  
12-paneth-cells-GF GSM116359 CEL  
11-paneth-cells-GF GSM318589 CEL  
10-paneth-cells-GF GSM318590 CEL  
09-paneth-cells-GF GSM480375 cel  
08-paneth-cells-GF GSM480374 cel  
07-paneth-cells-GF GSM116358 CEL  
06-paneth-cells-GF GSM116357 CEL  
05-paneth-cells-GF GSM116350 CEL  
04-paneth-cells-GF GSM116359 CEL  
03-paneth-cells-GF GSM318589 CEL  
02-paneth-cells-GF GSM318590 CEL  
01-paneth-cells-GF GSM480375 cel



Cluster0157\_House keeping-transcription (12 nodes)

9,772.3  
9,258  
8,743.7  
8,229.3  
7,715  
7,200.7  
6,686.3  
6,172  
5,657.7  
5,143.3  
4,629  
4,114.7  
3,600.3  
3,086  
2,571.7  
2,057.3  
1,543  
1,028.7  
514.3  
0

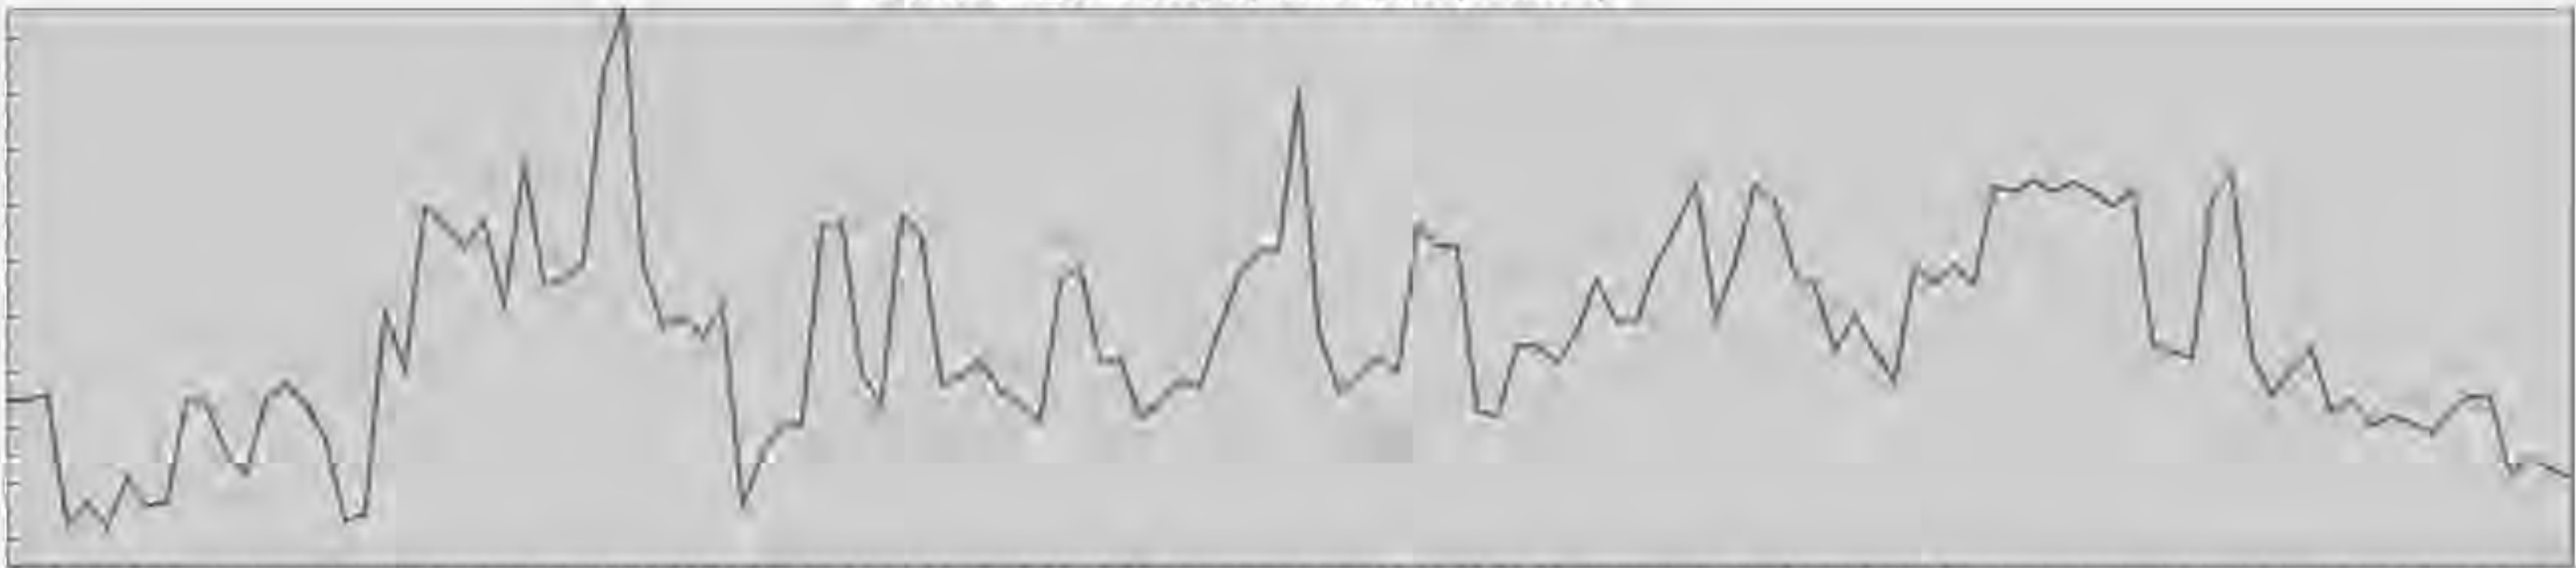

01-PP-M-cells\_GSM190789.CEL  
 02-PP-M-cells\_GSM190790.CEL  
 03-PP-M-cells\_GSM190791.CEL  
 04-CT-v-M-cells\_GSM190792.CEL  
 05-CT-v-M-cells\_GSM190793.CEL  
 06-CT-v-M-cells\_GSM190794.CEL  
 07-Ileum-IEC\_GSM190795.CEL  
 08-Ileum-IEC\_GSM190796.CEL  
 09-Ileum-IEC\_GSM190797.CEL  
 10-FAE-RMPYEP001001.CEL  
 11-FAE-RMPYEP002001.CEL  
 12-SmallIntestine-epithelium\_RMINEP001001.CEL  
 13-SmallIntestine-epithelium\_RMINEP002001.CEL  
 14-Ileum-IEC\_GSM350371.CEL  
 15-Ileum-IEC\_GSM350375.CEL  
 16-Color-IEC-Gf\_GSM350375.CEL  
 17-Color-IEC-Gf\_GSM349880.CEL  
 18-Color-Vill-GSM480362.CEL  
 19-Color-Vill-GSM480363.CEL  
 20-Color-Crypt-GSM480374.CEL  
 21-Color-Crypt-GSM480375.CEL  
 22-Paneth-cells\_GSM318589.CEL  
 23-Paneth-cells\_GSM318590.CEL  
 24-Paneth-cells\_GSM116359.CEL  
 25-Paneth-cells\_GSM116359.CEL  
 26-Paneth-cells-Gf-GSM116357.CEL  
 27-Paneth-cells-Gf-GSM116357.CEL  
 28-Bone marrow\_GSM258627.CEL  
 29-Bone marrow\_GSM258627.CEL  
 30-HSC\_GSM258770.CEL  
 31-MEP-GSM258770.CEL  
 32-MEP-GSM258770.CEL  
 33-MEP-GSM258770.CEL  
 34-MEP-GSM258770.CEL  
 35-MEP-GSM258770.CEL  
 36-MEP-GSM258770.CEL  
 37-MEP-GSM258770.CEL  
 38-MEP-GSM258770.CEL  
 39-Granulocytes\_GSM258771.CEL  
 40-Mast-cells\_GSM258771.CEL  
 41-Mast-cells-Gf-GSM258771.CEL  
 42-Mast-cells-Gf-GSM258771.CEL  
 43-Mast-cells-Gf-GSM258771.CEL  
 44-Mast-cells-Gf-GSM258771.CEL  
 45-Mast-cells-Gf-GSM258771.CEL  
 46-NK-cells\_GSM258771.CEL  
 47-NK-cells\_GSM258771.CEL  
 48-CD8a+DC\_GSM258646.CEL  
 49-CD8a+DC\_GSM258646.CEL  
 50-CD8a+DC\_GSM258647.CEL  
 51-CD8a+DC\_GSM258647.CEL  
 52-CD8a+DC\_GSM258647.CEL  
 53-CD8a+DC\_GSM258647.CEL  
 54-CD8a+DC\_GSM258647.CEL  
 55-CD8a+DC\_GSM258647.CEL  
 56-CD8a+DC\_GSM258647.CEL  
 57-CD8a+DC\_GSM258647.CEL  
 58-CD8a+DC\_GSM258647.CEL  
 59-CD8a+DC\_GSM258647.CEL  
 60-CD8a+DC\_GSM258647.CEL  
 61-CD8a+DC\_GSM258647.CEL  
 62-Microglia\_GSM258721.CEL  
 63-Microglia\_GSM258721.CEL  
 64-Microglia\_GSM258721.CEL  
 65-Osteoclasts\_GSM258743.CEL  
 66-Osteoclasts\_GSM258743.CEL  
 67-Thymocyte-DN\_GSM465595.CEL  
 68-Thymocyte-DN\_GSM465595.CEL  
 69-T-cells-CD4+\_GSM258773.CEL  
 70-T-cells-CD4+\_GSM258773.CEL  
 71-T-cells-CD8+\_GSM258776.CEL  
 72-T-cells-CD8+\_GSM258776.CEL  
 73-Tregs\_GSM258778.CEL  
 74-Tregs\_GSM258778.CEL  
 75-Tregs\_GSM258778.CEL  
 76-Tregs\_GSM258778.CEL  
 77-Tregs\_GSM258778.CEL  
 78-Tregs\_GSM258778.CEL  
 79-Tregs\_GSM258778.CEL  
 80-Tregs\_GSM258778.CEL  
 81-Tregs\_GSM258778.CEL  
 82-Tregs\_GSM258778.CEL  
 83-Tregs\_GSM258778.CEL  
 84-Tregs\_GSM258778.CEL  
 85-Tregs\_GSM258778.CEL  
 86-Tregs\_GSM258778.CEL  
 87-Tregs\_GSM258778.CEL  
 88-Tregs\_GSM258778.CEL  
 89-Tregs\_GSM258778.CEL  
 90-Tregs\_GSM258778.CEL  
 91-Tregs\_GSM258778.CEL  
 92-Tregs\_GSM258778.CEL  
 93-Tregs\_GSM258778.CEL  
 94-Tregs\_GSM258778.CEL  
 95-Tregs\_GSM258778.CEL  
 96-Tregs\_GSM258778.CEL  
 97-Tregs\_GSM258778.CEL  
 98-Tregs\_GSM258778.CEL  
 99-Tregs\_GSM258778.CEL  
 100-Tregs\_GSM258778.CEL  
 101-Tregs\_GSM258778.CEL  
 102-Tregs\_GSM258778.CEL  
 103-Tregs\_GSM258778.CEL  
 104-Tregs\_GSM258778.CEL  
 105-Tregs\_GSM258778.CEL  
 106-Tregs\_GSM258778.CEL  
 107-Tregs\_GSM258778.CEL  
 108-Tregs\_GSM258778.CEL  
 109-Tregs\_GSM258778.CEL  
 110-Tregs\_GSM258778.CEL  
 111-Tregs\_GSM258778.CEL  
 112-Tregs\_GSM258778.CEL  
 113-Tregs\_GSM258778.CEL  
 114-Tregs\_GSM258778.CEL  
 115-Tregs\_GSM258778.CEL  
 116-Tregs\_GSM258778.CEL  
 117-Tregs\_GSM258778.CEL  
 118-Tregs\_GSM258778.CEL  
 119-Tregs\_GSM258778.CEL  
 120-Tregs\_GSM258778.CEL  
 121-Tregs\_GSM258778.CEL  
 122-Tregs\_GSM258778.CEL  
 123-Tregs\_GSM258778.CEL  
 124-Tregs\_GSM258778.CEL  
 125-Tregs\_GSM258778.CEL  
 126-Tregs\_GSM258778.CEL  
 127-Tregs\_GSM258778.CEL  
 128-Tregs\_GSM258778.CEL  
 129-Tregs\_GSM258778.CEL  
 130-Tregs\_GSM258778.CEL



Cluster0158\_High in 10T12 cells (12 nodes)

1,344.4  
1,273.6  
1,202.9  
1,132.1  
1,061.3  
990.8  
919.8  
849.1  
778.3  
707.8  
636.8  
566  
495.3  
424.5  
353.8  
283  
212.3  
141.5  
70.8  
0

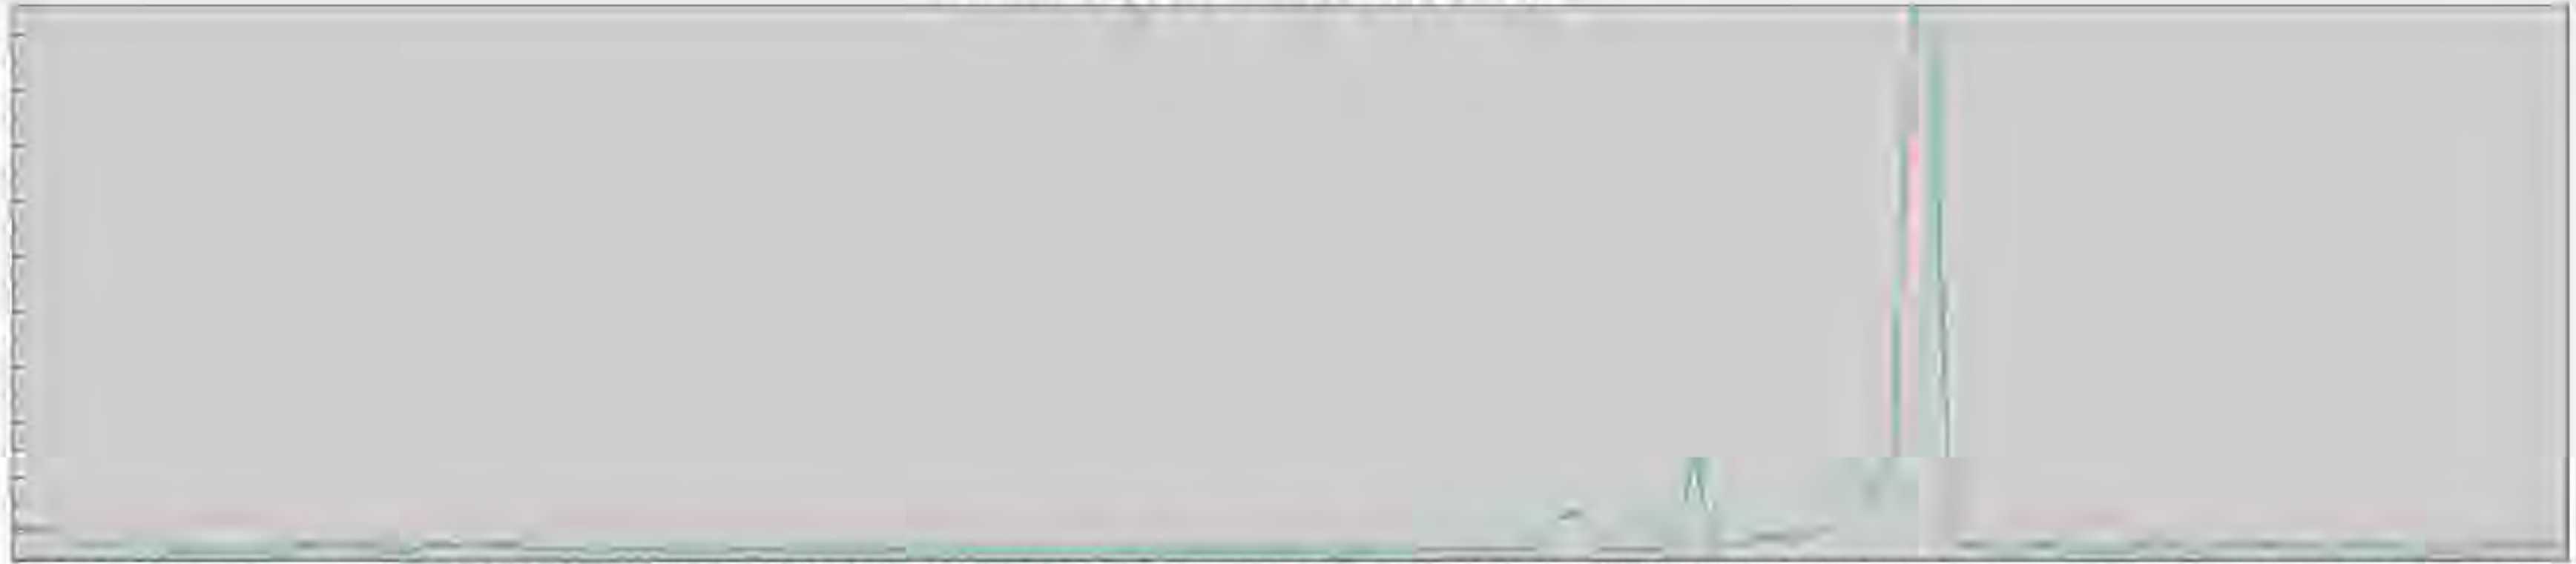

30- NALT GSM289411 CELL  
 129- NALT GSM289410 CELL  
 128- NALT GSM289409 CELL  
 127- NALT GSM289408 CELL  
 126- Colon-d9 GSM1988105 CELL  
 125- Colon-d9 GSM1988104 CELL  
 124- Colon-d9 GSM1988103 CELL  
 123- Colon-d4 GSM1988102 CELL  
 122- Colon-d4 GSM1988101 CELL  
 121- Intestine-large GSM258676 CELL  
 120- Intestine-large GSM258675 CELL  
 119- Intestine-small GSM258674 CELL  
 118- Intestine-small GSM258673 CELL  
 117- Lymph-nodes GSM258672 CELL  
 116- Spleen GSM258671 CELL  
 115- Spleen GSM258670 CELL  
 114- Neuro2a GSM258669 CELL  
 113- Neuro2a GSM258668 CELL  
 112- Astrocytes GSM241898 CELL  
 111- Astrocytes GSM241897 CELL  
 110- mimb GSM2586725 CELL  
 109- mimb GSM2586724 CELL  
 108- MIMCD3 GSM2586723 CELL  
 107- MIMCD3 GSM2586722 CELL  
 106- Bruce4 GSM2586721 CELL  
 105- Bruce4 GSM2586720 CELL  
 104- C2C12 GSM2586719 CELL  
 103- C2C12 GSM2586718 CELL  
 102- NH3T3 GSM2586730 CELL  
 101- NH3T3 GSM2586729 CELL  
 100- 3T3-L1 GSM2586710 CELL  
 99- 3T3-L1 GSM2586609 CELL  
 98- 10T12 GSM2586632 CELL  
 97- 10T12 GSM2586631 CELL  
 96- Osteoblast-d21 GSM2586740 CELL  
 95- Osteoblast-d14 GSM2586738 CELL  
 94- Osteoblast-d14 GSM2586737 CELL  
 93- Osteoblast-d14 GSM2586742 CELL  
 92- Osteoblast-d5 GSM2586741 CELL  
 91- Osteoblast-d5 GSM2586741 CELL  
 90- Chondrocytes GSM266740 CELL  
 89- Nat Helper cell GSM465594 CELL  
 88- Nat Helper cell GSM465593 CELL  
 87- T cell GSM465596 CELL  
 86- T cell GSM465596 CELL  
 85- MS-1 GSM234692 CELL  
 84- Lymph-endo-cells GSM143704 CELL  
 83- P-FDC GSM481977 CELL  
 82- P-FDC GSM481978 CELL  
 81- P-FDC GSM481976 CELL  
 80- F-LY RMLNDCC003001 CELL  
 79- F-LY RMLNDCC003001 CELL  
 78- Follicular-B-cells GSM258664 CELL  
 77- Follicular-B-cells GSM258663 CELL  
 76- MZ-Bcell GSM258627 CELL  
 75- MZ-Bcell GSM258627 CELL  
 74- BAF3 GSM258620 CELL  
 73- BAF3 GSM258619 CELL  
 72- Tregs GSM2586778 CELL  
 71- Tregs GSM2586777 CELL  
 70- T-cells-CD8+ GSM2586776 CELL  
 69- T-cells-CD8+ GSM2586774 CELL  
 68- T-cells-CD4+ GSM2586773 CELL  
 67- T-cells-CD4+ GSM2586744 CELL  
 66- Thymocyte-DN GSM465595 CELL  
 65- Osteoclasts GSM2586743 CELL  
 64- Microglia GSM2586721 CELL  
 63- Microglia GSM2586721 CELL  
 62- MM-LPS-7h GSM2586705 CELL  
 61- MM-LPS-7h GSM2586705 CELL  
 60- MM-LPS-6h GSM2586702 CELL  
 59- MM-LPS-6h GSM2586702 CELL  
 58- MM-LPS-6h GSM2586699 CELL  
 57- MM-LPS-6h GSM2586699 CELL  
 56- MM-LPS-6h GSM2586694 CELL  
 55- MM-LPS-6h GSM2586694 CELL  
 54- MM-LPS-6h GSM2586694 CELL  
 53- MM-LPS-6h GSM2586694 CELL  
 52- MM-LPS-6h GSM2586694 CELL  
 51- MM-LPS-6h GSM2586694 CELL  
 50- CD8a-DC GSM2586647 CELL  
 49- CD8a-DC GSM2586646 CELL  
 48- CD8a+DC GSM2586646 CELL  
 47- NK-cells GSM2586732 CELL  
 46- NK-cells GSM2586731 CELL  
 45- Mast-cells-IgE+Ad GSM2586718 CELL  
 44- Mast-cells-IgE+Ad GSM2586717 CELL  
 43- Mast-cells-IgE GSM2586714 CELL  
 42- Mast-cells-IgE GSM2586713 CELL  
 41- Mast-cells GSM2586712 CELL  
 40- Mast-cells GSM2586712 CELL  
 39- Granulocytes GSM2586667 CELL  
 38- Granulocytes GSM2586667 CELL  
 37- GMP GSM2586666 CELL  
 36- GMP GSM2586665 CELL  
 35- GMP GSM2586642 CELL  
 34- MIEP GSM2586720 CELL  
 33- MIEP GSM2586719 CELL  
 32- MIEP GSM2586719 CELL  
 31- HSC GSM2586770 CELL  
 30- HSC GSM2586769 CELL  
 29- Bone marrow GSM258628 CELL  
 28- Bone marrow GSM258627 CELL  
 27- Paneth-cells-GF-1 GSM116357 CELL  
 26- Paneth-cells-GF-1 GSM116357 CELL  
 25- Paneth-cells GSM116350 CELL  
 24- Paneth-cells GSM116359 CELL  
 23- Paneth-cells GSM318589 CELL  
 22- Paneth-cells GSM318590 CELL  
 21- Colon-Crypt GSM480375 CELL  
 20- Colon-Crypt GSM480374 CELL  
 19- Colon-Vill GSM480363 CELL  
 18- Colon-Vill GSM480362 CELL  
 17- Colon-IEC-GF GSM349880 CELL  
 16- Colon-IEC-GF GSM350375 CELL  
 15- Ileum-IEC-GF GSM350376 CELL  
 14- Ileum-IEC GSM350371 CELL  
 13- Small-intestine-epithelium RMINEP002901 CELL  
 12- Small-intestine-epithelium RMINEP001001 CELL  
 11- FAE-RMPYEP001001 CELL  
 10- FAE-RMPYEP001001 CELL  
 09- Ileum-IEC GSM190797 CELL  
 08- Ileum-IEC GSM190796 CELL  
 07- Ileum-IEC GSM190795 CELL  
 06- CT-w-M-cells GSM190794 CELL  
 05- CT-y-M-cells GSM190793 CELL  
 04- CT-y-M-cells GSM190792 CELL  
 03- PP-M-cells GSM190791 CELL  
 02- PP-M-cells GSM190790 CELL  
 01- PP-M-cells GSM190789 CELL



Cluster0159\_High in Peyer's patches (12 nodes)

2,792.1  
2,645.1  
2,498.2  
2,351.2  
2,204.3  
2,057.3  
1,910.4  
1,763.4  
1,616.5  
1,469.5  
1,322.6  
1,175.6  
1,028.7  
881.7  
734.8  
587.8  
440.9  
293.9  
147  
0

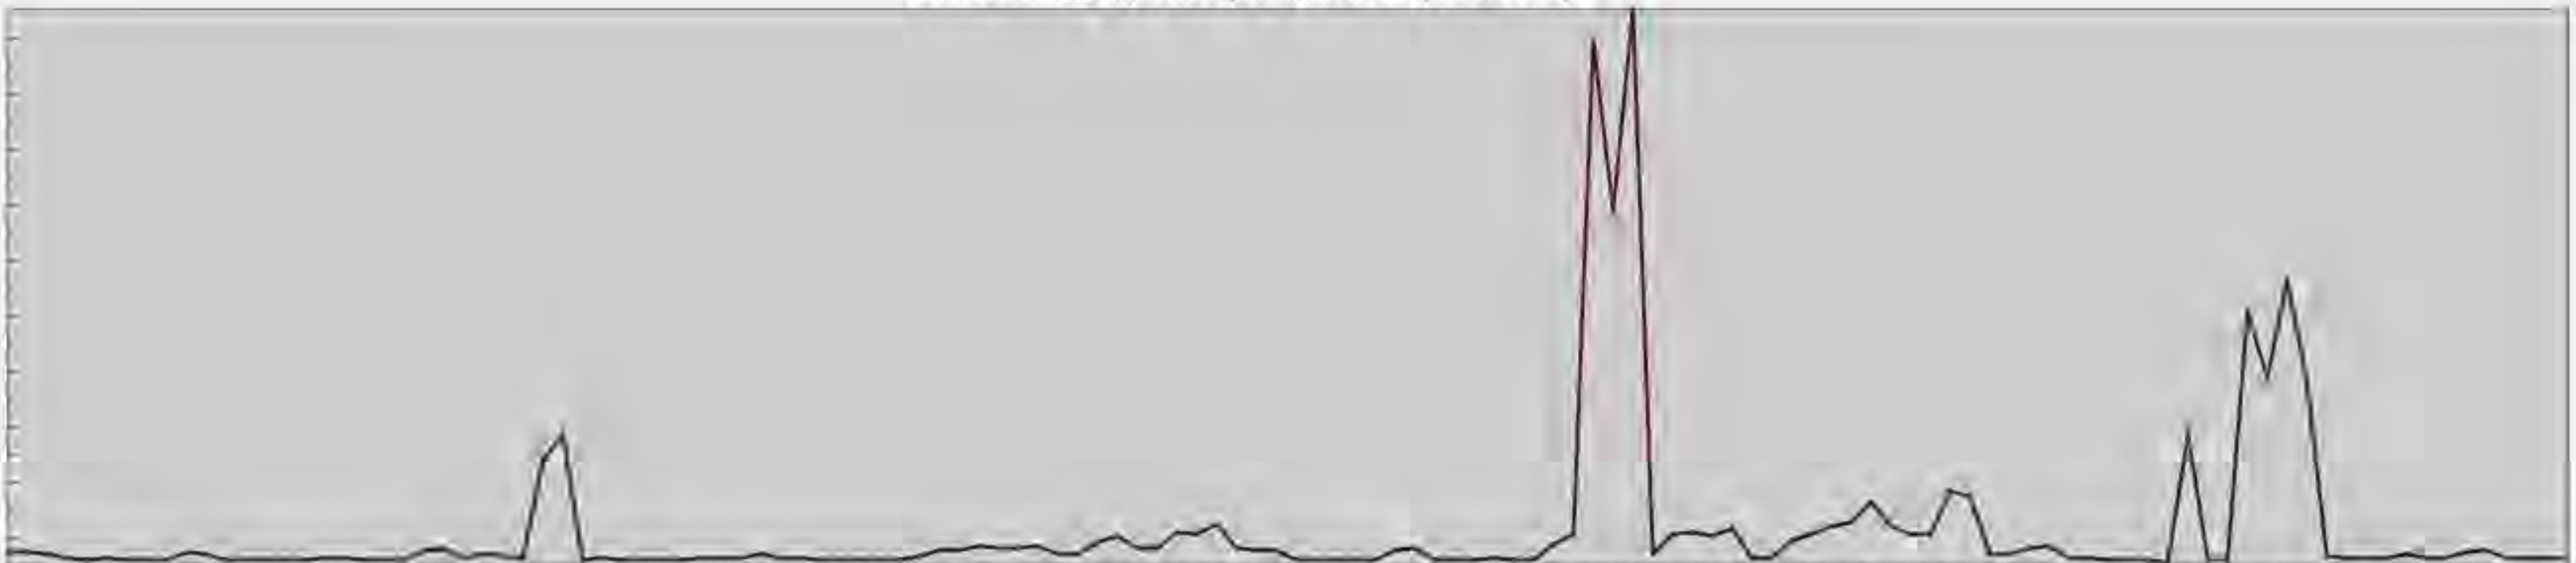

130-NALT GSM289411 CEL  
129-NALT GSM289410 CEL  
128-NALT GSM289409 CEL  
127-NALT GSM289408 CEL  
126-Color-d9 GSM1988105 CEL  
125-Color-d9 GSM1988103 CEL  
124-Color-d9 GSM1988102 CEL  
123-Color-d4 GSM1988101 CEL  
122-Color-d4 GSM1988101 CEL  
121-Intestine-large GSM258676 CEL  
120-Intestine-large GSM258675 CEL  
119-Intestine-small GSM258677 CEL  
118-Intestine-small GSM258692 CEL  
117-Lymph-nodes GSM258691 CEL  
116-Lymph-nodes GSM258768 CEL  
115-Spleen GSM258767 CEL  
114-Spleen GSM258767 CEL  
113-Neuro2a GSM241898 CEL  
112-Neuro2a GSM241898 CEL  
111-Astrocytes GSM241898 CEL  
110-mimb GSM258726 CEL  
109-mimb GSM258725 CEL  
108-MIMCD3 GSM258724 CEL  
107-MIMCD3 GSM258723 CEL  
106-Bruce4 GSM258656 CEL  
105-Bruce4 GSM258656 CEL  
104-C2C12 GSM258690 CEL  
103-C2C12 GSM258629 CEL  
102-NH3T3 GSM258739 CEL  
101-NH3T3 GSM258739 CEL  
100-3T3-L1 GSM258610 CEL  
99-3T3-L1 GSM258609 CEL  
98-10T12 GSM258632 CEL  
97-10T12 GSM258631 CEL  
96-Osteoblast-d21 GSM258740 CEL  
95-Osteoblast-d21 GSM258739 CEL  
94-Osteoblast-d14 GSM258738 CEL  
93-Osteoblast-d14 GSM258737 CEL  
92-Osteoblast-d5 GSM258742 CEL  
91-Osteoblast-d5 GSM258741 CEL  
90-Chondrocytes GSM266741 CEL  
89-Chondrocytes GSM266740 CEL  
88-Nat Helper cell GSM465594 CEL  
87-Nat Helper cell GSM465593 CEL  
86-LT cell GSM465596 CEL  
85-MS-1 GSM234692 CEL  
84-Lymph-endo-cells GSM143704 CEL  
83-PP-FDC GSM481977 CEL  
82-PP-FDC GSM481976 CEL  
81-PP-FDC GSM481976 CEL  
80-LY-RMLNDCC002001 CEL  
79-LY-RMLNDCC002001 CEL  
78-Follicular-Bcells GSM258664 CEL  
77-Follicular-Bcells GSM258663 CEL  
76-MZ-Bcell GSM258622 CEL  
75-MZ-Bcell GSM258621 CEL  
74-BAF3 GSM258620 CEL  
73-BAF3 GSM258619 CEL  
72-Tregs GSM258778 CEL  
71-Tregs GSM258777 CEL  
70-T-cells-CD8+ GSM258776 CEL  
69-T-cells-CD8+ GSM258774 CEL  
68-T-cells-CD4+ GSM258773 CEL  
67-T-cells-CD4+ GSM258773 CEL  
66-Thymocyte-DN GSM465595 CEL  
65-Osteoclasts GSM258743 CEL  
64-Osteoclasts GSM258743 CEL  
63-Microglia GSM258721 CEL  
62-Microglia GSM258721 CEL  
61-MM-LPS-7h GSM258706 CEL  
60-MM-LPS-7h GSM258706 CEL  
59-MM-LPS-6h GSM258702 CEL  
58-MM-LPS-6h GSM258702 CEL  
57-MM-LPS-6h GSM258699 CEL  
56-MM-LPS-6h GSM258699 CEL  
55-MM-LPS-6h GSM258694 CEL  
54-MM-LPS-6h GSM258694 CEL  
53-Iasmacryoid-DC GSM258650 CEL  
52-Iasmacryoid-DC GSM258649 CEL  
51-CD8a-DC GSM258648 CEL  
50-CD8a-DC GSM258647 CEL  
49-CD8a+DC GSM258646 CEL  
48-CD8a+DC GSM258646 CEL  
47-NK-cells GSM258732 CEL  
46-NK-cells GSM258731 CEL  
45-Mast-cells-IgE+Ad GSM258719 CEL  
44-Mast-cells-IgE+Ad GSM258717 CEL  
43-Mast-cells-IgE GSM258714 CEL  
42-Mast-cells-IgE GSM258713 CEL  
41-Mast-cells GSM258712 CEL  
40-Granulocytes GSM258668 CEL  
39-Granulocytes GSM258667 CEL  
38-GMP GSM258666 CEL  
37-GMP GSM258665 CEL  
36-GMP GSM258665 CEL  
35-CMP GSM258642 CEL  
34-CMP GSM258642 CEL  
33-MIEP GSM258720 CEL  
32-MIEP GSM258719 CEL  
31-HSC GSM258770 CEL  
30-HSC GSM258769 CEL  
29-Bone marrow GSM258628 CEL  
28-Bone marrow GSM258627 CEL  
27-paneth-cells-GE GSM116358 CEL  
26-paneth-cells-GE GSM116357 CEL  
25-paneth-cells GSM116350 CEL  
24-paneth-cells GSM116359 CEL  
23-paneth-cells GSM318589 CEL  
22-paneth-cells GSM318590 CEL  
21-Color-Crypt GSM480375 cel  
20-Color-Crypt GSM480374 cel  
19-Color-Vill GSM480363 cel  
18-Color-Vill GSM480362 cel  
17-Color-IEC-GE GSM349880 CEL  
16-Color-IEC-GE GSM350375 CEL  
15-Ileum-IEC-GE GSM350376 CEL  
14-Ileum-IEC GSM350371 CEL  
13-Small-intestine-epithelium RMINEP002901 CEL  
12-Small-intestine-epithelium RMINEP001001 CEL  
11-FAE-RMPYEP002001 CEL  
10-FAE-RMPYEP001001 CEL  
09-Ileum-IEC GSM190797 CEL  
08-Ileum-IEC GSM190796 CEL  
07-Ileum-IEC GSM190795 CEL  
06-CT-w-M-cells GSM190794 CEL  
05-CT-w-M-cells GSM190793 CEL  
04-CT-w-M-cells GSM190792 CEL  
03-PP-M-cells GSM190791 CEL  
02-PP-M-cells GSM190790 CEL  
01-PP-M-cells GSM190789 CEL



Cluster0160\_Phagocyte-related (11 nodes)

6,981.1  
6,613.7  
6,246.3  
5,878.8  
5,511.4  
5,144  
4,776.6  
4,409.1  
4,041.7  
3,674.3  
3,306.6  
2,939.4  
2,572  
2,204.6  
1,837.1  
1,469.7  
1,102.3  
734.9  
367.4  
0

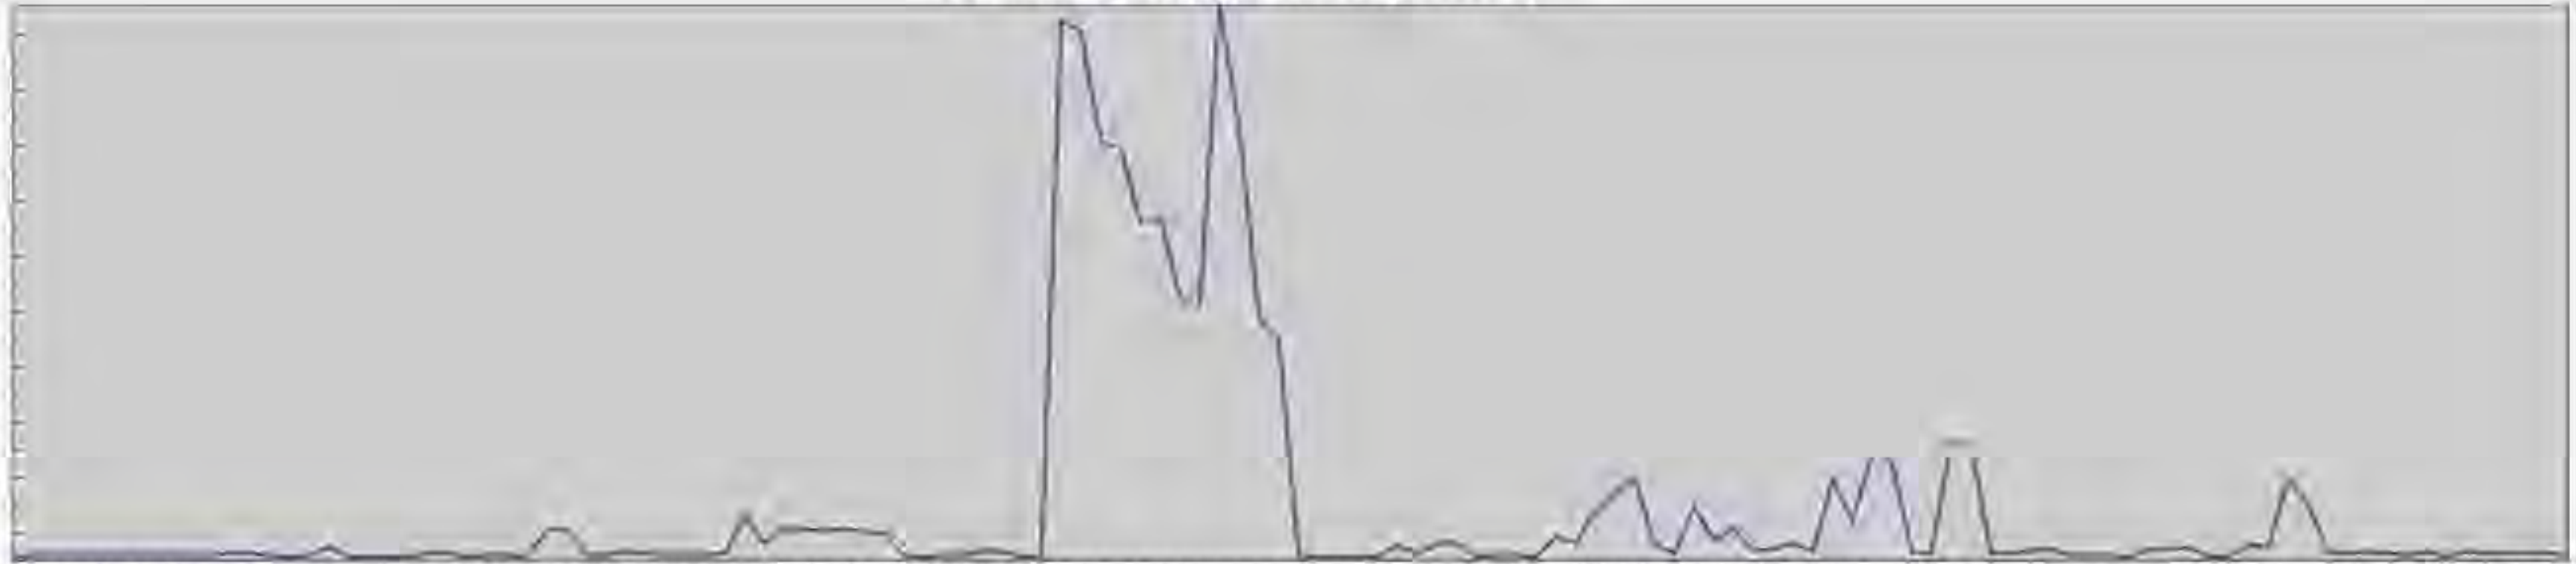

130-NALT GSM289411 CELL  
129-NALT GSM289410 CELL  
128-NALT GSM289409 CELL  
127-NALT GSM289408 CELL  
126-Color-d9 GSM1988105 CELL  
125-Color-d9 GSM1988103 CELL  
124-Color-d9 GSM1988102 CELL  
123-Color-d4 GSM1988101 CELL  
122-Color-d4 GSM1988100 CELL  
121-Intestine-large GSM258676 CELL  
120-Intestine-large GSM258675 CELL  
119-Intestine-small GSM258678 CELL  
118-Intestine-small GSM258692 CELL  
117-Lymph-nodes GSM258691 CELL  
116-Lymph-nodes GSM258766 CELL  
115-Spleen GSM258767 CELL  
114-Spleen GSM258768 CELL  
113-Neuro2a GSM258728 CELL  
112-Neuro2a GSM258729 CELL  
111-Astrocytes GSM241898 CELL  
110-mimb GSM258726 CELL  
109-mimb GSM258725 CELL  
108-MIMCD3 GSM258724 CELL  
107-MIMCD3 GSM258723 CELL  
106-Bruce4 GSM258656 CELL  
105-Bruce4 GSM258655 CELL  
104-C2C12 GSM258690 CELL  
103-C2C12 GSM258689 CELL  
102-NH3T3 GSM258730 CELL  
101-NH3T3 GSM258729 CELL  
100-3T3-L1 GSM258610 CELL  
99-3T3-L1 GSM258609 CELL  
98-10T12 GSM258632 CELL  
97-10T12 GSM258631 CELL  
96-Osteoblast-d21 GSM258740 CELL  
95-Osteoblast-d21 GSM258739 CELL  
94-Osteoblast-d14 GSM258738 CELL  
93-Osteoblast-d14 GSM258737 CELL  
92-Osteoblast-d5 GSM258742 CELL  
91-Osteoblast-d5 GSM258741 CELL  
90-Chondrocytes GSM266741 CELL  
89-Chondrocytes GSM266740 CELL  
88-Nat Helper cell GSM465594 CELL  
87-Nat Helper cell GSM465593 CELL  
86-TT cell GSM465596 CELL  
85-MS-1 GSM234692 CELL  
84-Lymph-endo-cells GSM143704 CELL  
83-PP-FDC GSM481977 CELL  
82-PP-FDC GSM481978 CELL  
81-PP-FDC GSM481976 CELL  
80-L-Y RMLNDCC003001 CELL  
79-L-Y RMLNDCC003001 CELL  
78-Follicular-Bcells GSM258664 CELL  
77-Follicular-Bcells GSM258663 CELL  
76-MZ-Bcell GSM258622 CELL  
75-MZ-Bcell GSM258621 CELL  
74-BAF3 GSM258620 CELL  
73-BAF3 GSM258619 CELL  
72-Tregs GSM258778 CELL  
71-Tregs GSM258777 CELL  
70-T-cells-CD8+ GSM258776 CELL  
69-T-cells-CD8+ GSM258774 CELL  
68-T-cells-CD4+ GSM258773 CELL  
67-T-cells-CD4+ GSM258744 CELL  
66-Thymocyte-DN GSM465595 CELL  
65-Osteoclasts GSM258743 CELL  
64-Osteoclasts GSM258743 CELL  
63-Microglia GSM258721 CELL  
62-Microglia GSM258721 CELL  
61-MM-LPS-7h GSM258706 CELL  
60-MM-LPS-7h GSM258706 CELL  
59-MM-LPS-6h GSM258702 CELL  
58-MM-LPS-6h GSM258701 CELL  
57-MM-LPS-6h GSM258700 CELL  
56-MM-LPS-6h GSM258699 CELL  
55-MM-LPS-6h GSM258699 CELL  
54-MM-LPS-6h GSM258694 CELL  
53-Plasmacytoid-DC GSM258650 CELL  
52-Plasmacytoid-DC GSM258649 CELL  
51-CD8a-DC GSM258648 CELL  
50-CD8a-DC GSM258647 CELL  
49-CD8a+DC GSM258646 CELL  
48-CD8a+DC GSM258646 CELL  
47-NK-cells GSM258732 CELL  
46-NK-cells GSM258731 CELL  
45-Mast-cells-IgE+Ad GSM258719 CELL  
44-Mast-cells-IgE+Ad GSM258717 CELL  
43-Mast-cells-IgE GSM258714 CELL  
42-Mast-cells-IgE GSM258713 CELL  
41-Mast-cells GSM258712 CELL  
40-Granulocytes GSM258668 CELL  
39-Granulocytes GSM258667 CELL  
38-GMP GSM258666 CELL  
37-GMP GSM258665 CELL  
36-GMP GSM258664 CELL  
35-GMP GSM258642 CELL  
34-MPEP GSM258641 CELL  
33-MPEP GSM258641 CELL  
32-MPEP GSM258770 CELL  
31-HESC GSM258770 CELL  
30-Bone marrow GSM258628 CELL  
29-Bone marrow GSM258627 CELL  
28-Paneth-cells-GE GSM116358 CELL  
27-Paneth-cells-GE GSM116357 CELL  
26-Paneth-cells-GE GSM116350 CELL  
25-Paneth-cells GSM116350 CELL  
24-Paneth-cells GSM116359 CELL  
23-Paneth-cells GSM318589 CELL  
22-Paneth-cells GSM318590 CELL  
21-Color-Crypt GSM480375 CELL  
20-Color-Crypt GSM480374 CELL  
19-Color-Vill GSM480363 CELL  
18-Color-Vill GSM480362 CELL  
17-Color-IEC-Gf GSM349880 CELL  
16-Color-IEC-Gf GSM350375 CELL  
15-Ileum-IEC-Gf GSM350376 CELL  
14-Ileum-IEC GSM350371 CELL  
13-Small-intestine-epithelium RMINEP002901 CELL  
12-Small-intestine-epithelium RMINEP001001 CELL  
11-FAE-RMPYEP002001 CELL  
10-FAE-RMPYEP001001 CELL  
09-Ileum-IEC GSM190797 CELL  
08-Ileum-IEC GSM190796 CELL  
07-Ileum-IEC GSM190795 CELL  
06-CT-w-M-cells GSM190794 CELL  
05-CT-w-M-cells GSM190793 CELL  
04-CT-y-M-cells GSM190792 CELL  
03-PP-M-cells GSM190791 CELL  
02-PP-M-cells GSM190790 CELL  
01-PP-M-cells GSM190789 CELL



Cluster0161\_High in haematopoietic cells (11 nodes)

445.5  
422.1  
398.6  
375.2  
351.7  
328.3  
304.8  
281.4  
257.9  
234.5  
211  
187.6  
164.1  
140.7  
117.2  
93.8  
70.3  
46.9  
23.4  
0

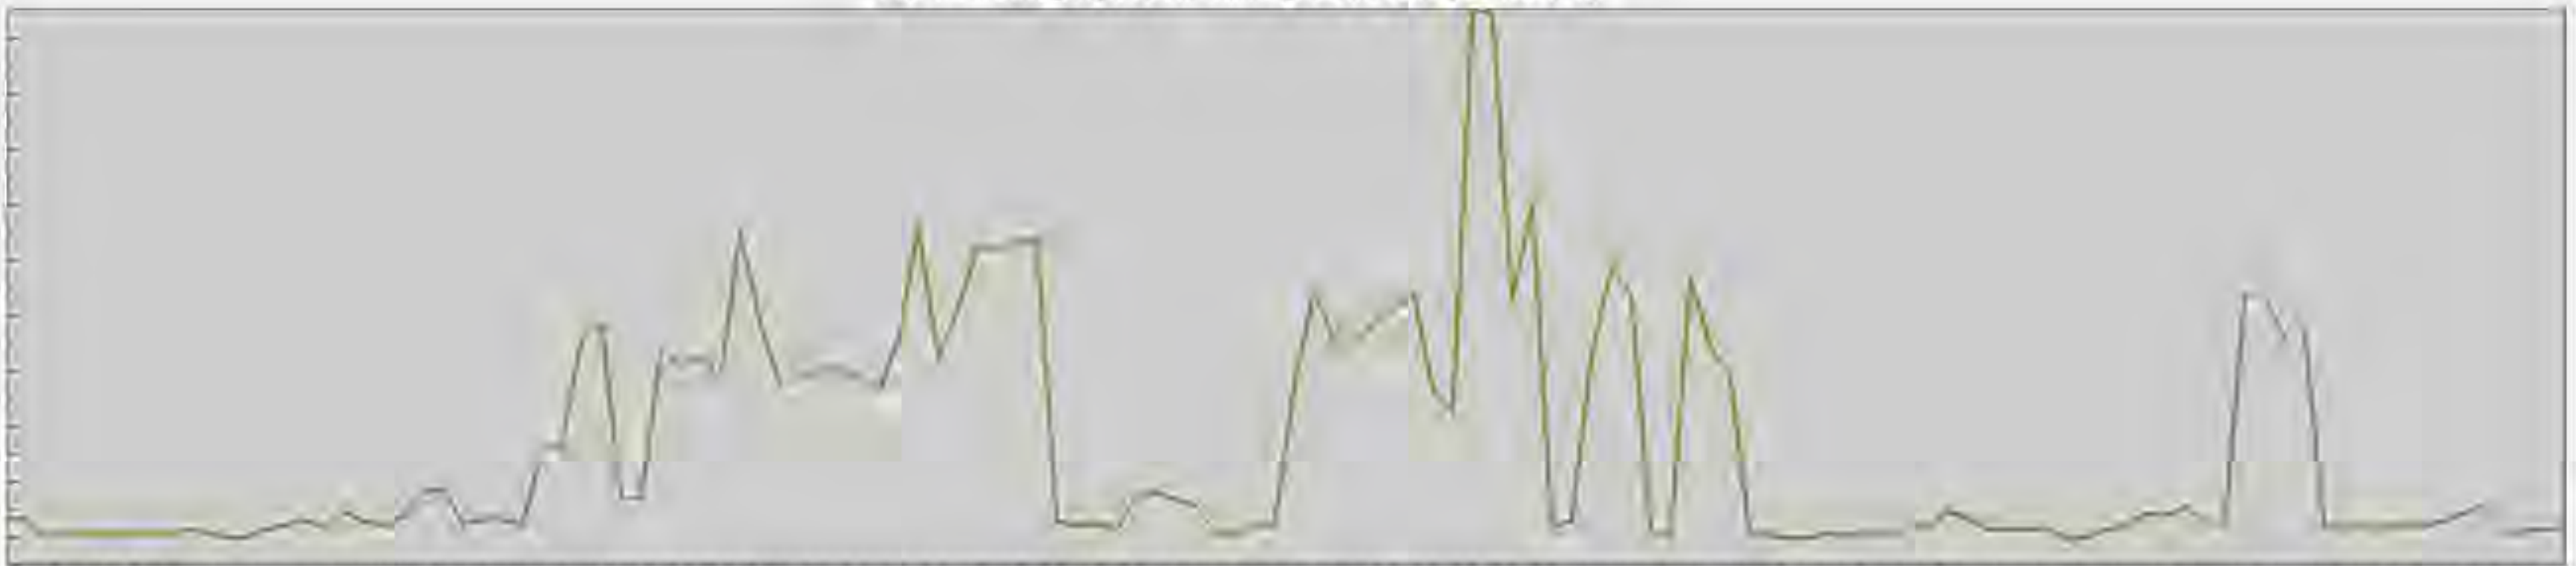

130-NALT GSM289411.CEL  
129-NALT GSM289410.CEL  
128-NALT GSM289409.CEL  
127-NALT GSM289408.CEL  
126-CD9 GSM1988105.CEL  
125-CD9 GSM1988104.CEL  
124-CD9 GSM1988103.CEL  
123-CD9 GSM1988102.CEL  
122-CD9 GSM1988101.CEL  
121-Intestine-large GSM258676.CEL  
120-Intestine-large GSM258675.CEL  
119-Intestine-small GSM258678.CEL  
118-Intestine-small GSM258692.CEL  
117-Lymph-nodes GSM258691.CEL  
116-Lymph-nodes GSM258726.CEL  
115-Spleen GSM258768.CEL  
114-Spleen GSM258767.CEL  
113-Neuro2a GSM258728.CEL  
112-Neuro2a GSM241898.CEL  
111-Astrocytes GSM241898.CEL  
110-mim6 GSM258726.CEL  
109-mim6 GSM258725.CEL  
108-MIMCD3 GSM258724.CEL  
107-MIMCD3 GSM258723.CEL  
106-Bruce4 GSM258656.CEL  
105-Bruce4 GSM258655.CEL  
104-C2C12 GSM258690.CEL  
103-C2C12 GSM258629.CEL  
102-NH3T3 GSM258739.CEL  
101-NH3T3 GSM258739.CEL  
100-3T3-L1 GSM258610.CEL  
99-3T3-L1 GSM258609.CEL  
98-10T12 GSM258632.CEL  
97-10T12 GSM258631.CEL  
96-Osteoblast-d21 GSM258740.CEL  
95-Osteoblast-d21 GSM258739.CEL  
94-Osteoblast-d14 GSM258738.CEL  
93-Osteoblast-d14 GSM258737.CEL  
92-Osteoblast-d5 GSM258742.CEL  
91-Osteoblast-d5 GSM258741.CEL  
90-Chondrocytes GSM266741.CEL  
89-Chondrocytes GSM266740.CEL  
88-Nat Helper cell GSM465594.CEL  
87-Nat Helper cell GSM465593.CEL  
86-LT cell GSM465596.CEL  
85-MS-1 GSM234692.CEL  
84-Lymph-endo-cells GSM143704.CEL  
83-PP-FDC GSM481977.CEL  
82-PP-FDC GSM481978.CEL  
81-PP-FDC GSM481976.CEL  
80-LY-RMLNDCC003001.CEL  
79-LY-RMLNDCC003001.CEL  
78-Follicular-Bcells GSM258664.CEL  
77-Follicular-Bcells GSM258663.CEL  
76-MZ-Bcell GSM258627.CEL  
75-MZ-Bcell GSM258627.CEL  
74-BAF3 GSM258620.CEL  
73-BAF3 GSM258619.CEL  
72-Tregs GSM258778.CEL  
71-Tregs GSM258777.CEL  
70-T-cells-CD8+ GSM258776.CEL  
69-T-cells-CD8+ GSM258774.CEL  
68-T-cells-CD4+ GSM258773.CEL  
67-T-cells-CD4+ GSM258744.CEL  
66-Thymocyte-DN GSM465595.CEL  
65-Osteoclasts GSM258743.CEL  
64-Microglia GSM258721.CEL  
63-Microglia GSM258721.CEL  
62-MM-LPS-7h GSM258706.CEL  
61-MM-LPS-7h GSM258706.CEL  
60-MM-LPS-6h GSM258702.CEL  
59-MM-LPS-6h GSM258702.CEL  
58-MM-LPS-6h GSM258699.CEL  
57-MM-LPS-6h GSM258699.CEL  
56-MM-LPS-6h GSM258694.CEL  
55-Plasmacytoid-DC GSM258650.CEL  
54-Plasmacytoid-DC GSM258649.CEL  
53-CD8a-DC GSM258647.CEL  
52-CD8a-DC GSM258647.CEL  
51-CD8a-DC GSM258647.CEL  
50-CD8a+DC GSM258646.CEL  
49-CD8a+DC GSM258646.CEL  
48-NK-cells GSM258732.CEL  
47-NK-cells GSM258732.CEL  
46-Mast-cells-IgE+Ad GSM258718.CEL  
45-Mast-cells-IgE+Ad GSM258718.CEL  
44-Mast-cells-IgE GSM258714.CEL  
43-Mast-cells-IgE GSM258714.CEL  
42-Mast-cells-IgE GSM258713.CEL  
41-Mast-cells GSM258712.CEL  
40-Granulocytes GSM258668.CEL  
39-Granulocytes GSM258667.CEL  
38-GMP GSM258666.CEL  
37-GMP GSM258666.CEL  
36-GMP GSM258666.CEL  
35-GMP GSM258642.CEL  
34-MEP GSM2588720.CEL  
33-MEP GSM2588720.CEL  
32-MEP GSM2588720.CEL  
31-HESC GSM2588770.CEL  
30-HESC GSM2588770.CEL  
29-Bone marrow GSM2588628.CEL  
28-Bone marrow GSM2588627.CEL  
27-paneth-cells-GF GSM116357.CEL  
26-paneth-cells-GF GSM116350.CEL  
25-paneth-cells GSM116350.CEL  
24-paneth-cells GSM116359.CEL  
23-paneth-cells GSM318589.CEL  
22-paneth-cells GSM318589.CEL  
21-CD9 GSM480375.CEL  
20-CD9 GSM480374.CEL  
19-CD9 GSM480363.CEL  
18-CD9 GSM480362.CEL  
17-CD9 GSM349880.CEL  
16-CD9 GSM350375.CEL  
15-CD9 GSM350376.CEL  
14-Intestine-epithelium RMINEP002001.CEL  
13-Intestine-epithelium RMINEP001001.CEL  
12-Intestine-epithelium RMINEP001001.CEL  
11-FAE-RMPYEP001001.CEL  
10-FAE-RMPYEP001001.CEL  
09-Ileum-IEC GSM190797.CEL  
08-Ileum-IEC GSM190796.CEL  
07-Ileum-IEC GSM190795.CEL  
06-CT-v-M-cells GSM190794.CEL  
05-CT-v-M-cells GSM190793.CEL  
04-CT-v-M-cells GSM190792.CEL  
03-PP-M-cells GSM190790.CEL  
02-PP-M-cells GSM190790.CEL  
01-PP-M-cells GSM190789.CEL



## Cluster0162\_Uncertain (11 nodes)

110.6  
104.7  
98.9  
93.1  
87.3  
81.5  
75.6  
69.8  
64  
58.2  
52.4  
46.6  
40.7  
34.9  
29.1  
23.3  
17.5  
11.6  
5.8  
0

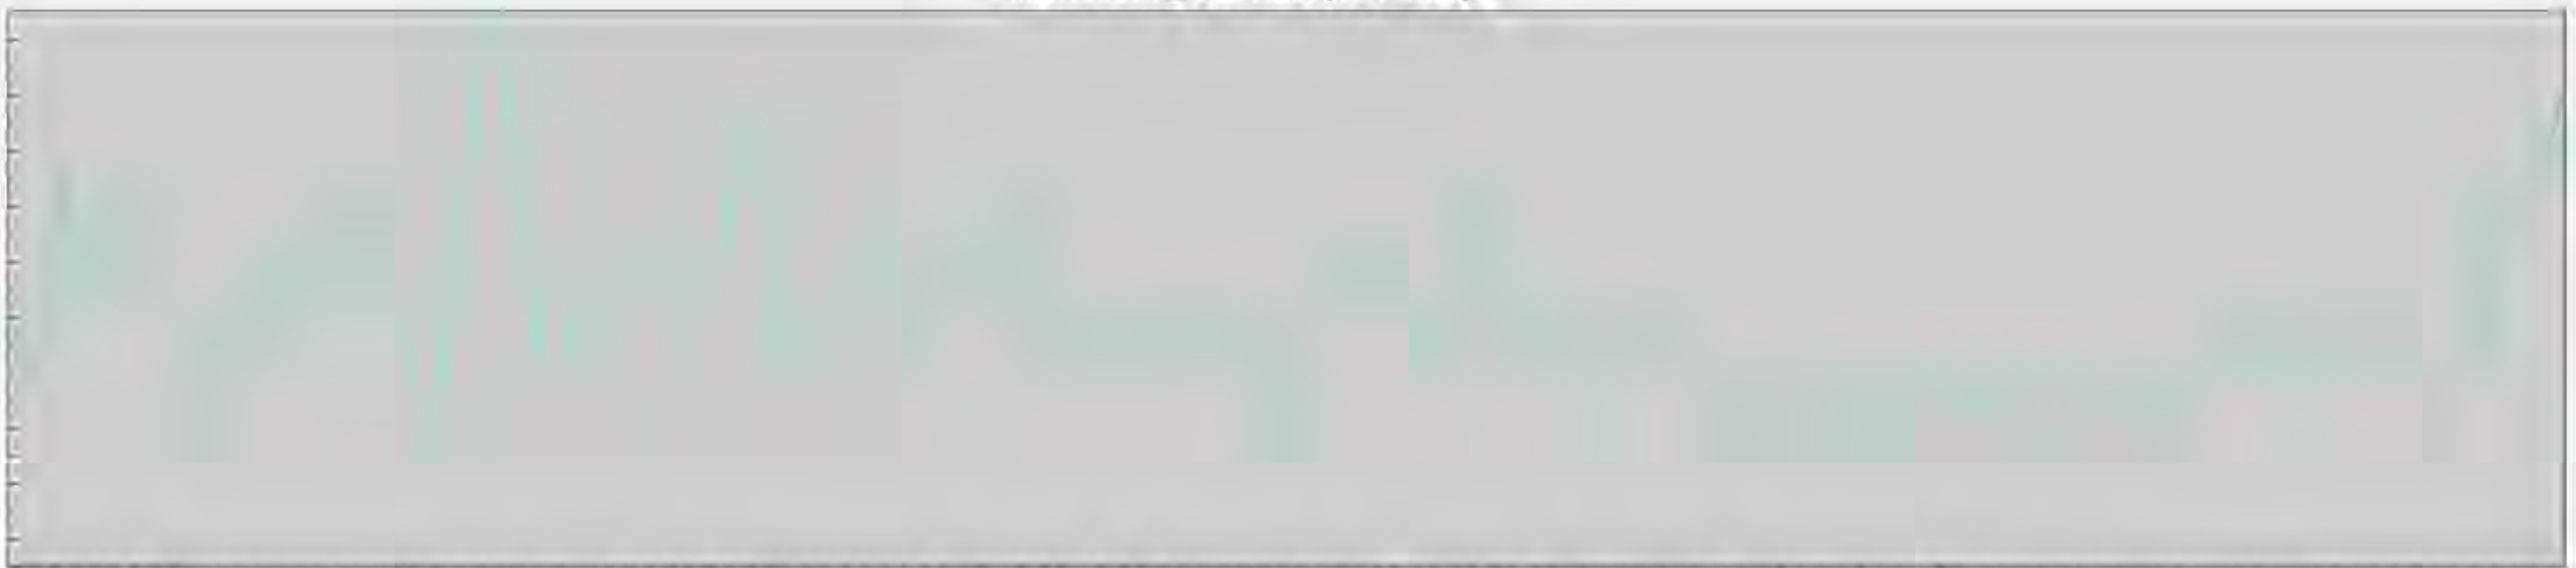

130-NALT GSM289411.CELL  
129-NALT GSM289410.CELL  
128-NALT GSM289409.CELL  
127-NALT GSM289408.CELL  
126-Column-d9 GSM1988105.CELL  
125-Column-d9 GSM1988104.CELL  
124-Column-d9 GSM1988103.CELL  
123-Column-d4 GSM1988102.CELL  
122-Column-d4 GSM1988101.CELL  
121-Intestine-large GSM258676.CELL  
120-Intestine-large GSM258675.CELL  
119-Intestine-small GSM258678.CELL  
118-Intestine-small GSM258692.CELL  
117-Lymph-nodes GSM258691.CELL  
116-Lymph-nodes GSM258726.CELL  
115-Spleen GSM258767.CELL  
114-Spleen GSM258767.CELL  
113-Neuro2a GSM258728.CELL  
112-Neuro2a GSM258727.CELL  
111-Astrocytes GSM241898.CELL  
110-mim6 GSM258726.CELL  
109-mim6 GSM258725.CELL  
108-MIMCD3 GSM258724.CELL  
107-MIMCD3 GSM258723.CELL  
106-Bruce4 GSM258656.CELL  
105-Bruce4 GSM258656.CELL  
104-C2C12 GSM258690.CELL  
103-C2C12 GSM258629.CELL  
102-NH3T3 GSM258730.CELL  
101-NH3T3 GSM258729.CELL  
100-3T3-L1 GSM258610.CELL  
99-3T3-L1 GSM258609.CELL  
98-10T12 GSM258632.CELL  
97-10T12 GSM258631.CELL  
96-Osteoblast-d21 GSM258740.CELL  
95-Osteoblast-d21 GSM258739.CELL  
94-Osteoblast-d14 GSM258738.CELL  
93-Osteoblast-d14 GSM258737.CELL  
92-Osteoblast-d5 GSM258742.CELL  
91-Osteoblast-d5 GSM258741.CELL  
90-Chondrocytes GSM266741.CELL  
89-Chondrocytes GSM266740.CELL  
88-Nat Helper cell GSM465594.CELL  
87-Nat Helper cell GSM465593.CELL  
86-TT cell GSM465596.CELL  
85-MS-1 GSM234692.CELL  
84-Lymph-endo-cells GSM143704.CELL  
83-PP-FDC GSM481977.CELL  
82-PP-FDC GSM481978.CELL  
81-PP-FDC GSM481976.CELL  
80-F-LY RMLNDCC003001.CELL  
79-F-LY RMLNDCC003001.CELL  
78-Follicular-Bcells GSM258664.CELL  
77-Follicular-Bcells GSM258663.CELL  
76-MZ-Bcell GSM258627.CELL  
75-MZ-Bcell GSM258627.CELL  
74-BAF3 GSM258620.CELL  
73-BAF3 GSM258619.CELL  
72-Tregs GSM258778.CELL  
71-Tregs GSM258777.CELL  
70-T-cells-CD8+ GSM258776.CELL  
69-T-cells-CD8+ GSM258774.CELL  
68-T-cells-CD4+ GSM258773.CELL  
67-T-cells-CD4+ GSM258773.CELL  
66-Thymocyte-DN GSM465595.CELL  
65-Osteoclasts GSM258743.CELL  
64-Osteoclasts GSM258743.CELL  
63-Microglia GSM258721.CELL  
62-Microglia GSM258721.CELL  
61-PM-M-PS-7h GSM258706.CELL  
60-PM-M-PS-7h GSM258705.CELL  
59-PM-M-PS-6h GSM258702.CELL  
58-PM-M-PS-6h GSM258701.CELL  
57-BMM-LPS-6h GSM258699.CELL  
56-BMM-LPS-6h GSM258699.CELL  
55-BMM-LPS-6h GSM258699.CELL  
54-BMM-LPS-6h GSM258699.CELL  
53-Plasmacytoid-DC GSM258650.CELL  
52-Plasmacytoid-DC GSM258649.CELL  
51-CD8a-DC GSM258648.CELL  
50-CD8a-DC GSM258647.CELL  
49-CD8a+DC GSM258646.CELL  
48-CD8a+DC GSM258646.CELL  
47-NK-cells GSM258732.CELL  
46-NK-cells GSM258731.CELL  
45-Mast-cells-IgE+Ad GSM258718.CELL  
44-Mast-cells-IgE+Ad GSM258717.CELL  
43-Mast-cells-IgE GSM258714.CELL  
42-Mast-cells-IgE GSM258713.CELL  
41-Mast-cells GSM258712.CELL  
40-Granulocytes GSM258668.CELL  
39-Granulocytes GSM258667.CELL  
38-GMP GSM258666.CELL  
37-GMP GSM258666.CELL  
36-GMP GSM258666.CELL  
35-GMP GSM258642.CELL  
34-GMP GSM258641.CELL  
33-MEP GSM258720.CELL  
32-MEP GSM258719.CELL  
31-HESC GSM258770.CELL  
30-HESC GSM258770.CELL  
29-Bone marrow GSM258628.CELL  
28-Bone marrow GSM258627.CELL  
27-paneth-cells-GF GSM116357.CELL  
26-paneth-cells-GF GSM116350.CELL  
25-paneth-cells GSM116350.CELL  
24-paneth-cells GSM116359.CELL  
23-paneth-cells GSM318589.CELL  
22-paneth-cells GSM318590.CELL  
21-Column-Crypt GSM480375.CELL  
20-Column-Crypt GSM480374.CELL  
19-Column-Vill GSM480363.CELL  
18-Column-Vill GSM480362.CELL  
17-Column-IEC-GF GSM349880.CELL  
16-Column-IEC-GF GSM350375.CELL  
15-Ileum-IEC-GF GSM350376.CELL  
14-Ileum-IEC GSM350371.CELL  
13-Small-intestine-epithelium RMINEP002001.CELL  
12-Small-intestine-epithelium RMINEP001001.CELL  
11-FAE-RMPYEP002001.CELL  
10-FAE-RMPYEP001001.CELL  
09-Ileum-IEC GSM190797.CELL  
08-Ileum-IEC GSM190796.CELL  
07-Ileum-IEC GSM190795.CELL  
06-CT-v-M-cells GSM190794.CELL  
05-CT-v-M-cells GSM190793.CELL  
04-CT-v-M-cells GSM190792.CELL  
03-PP-M-cells GSM190791.CELL  
02-PP-M-cells GSM190790.CELL  
01-PP-M-cells GSM190789.CELL







### Cluster0164\_House keeping-nucleus (11 nodes)

1,775.6  
1,682.1  
1,588.6  
1,495.2  
1,401.7  
1,308.3  
1,214.8  
1,121.4  
1,027.9  
934.5  
841  
747.8  
654.1  
560.7  
467.2  
373.8  
280.3  
186.9  
93.4  
0

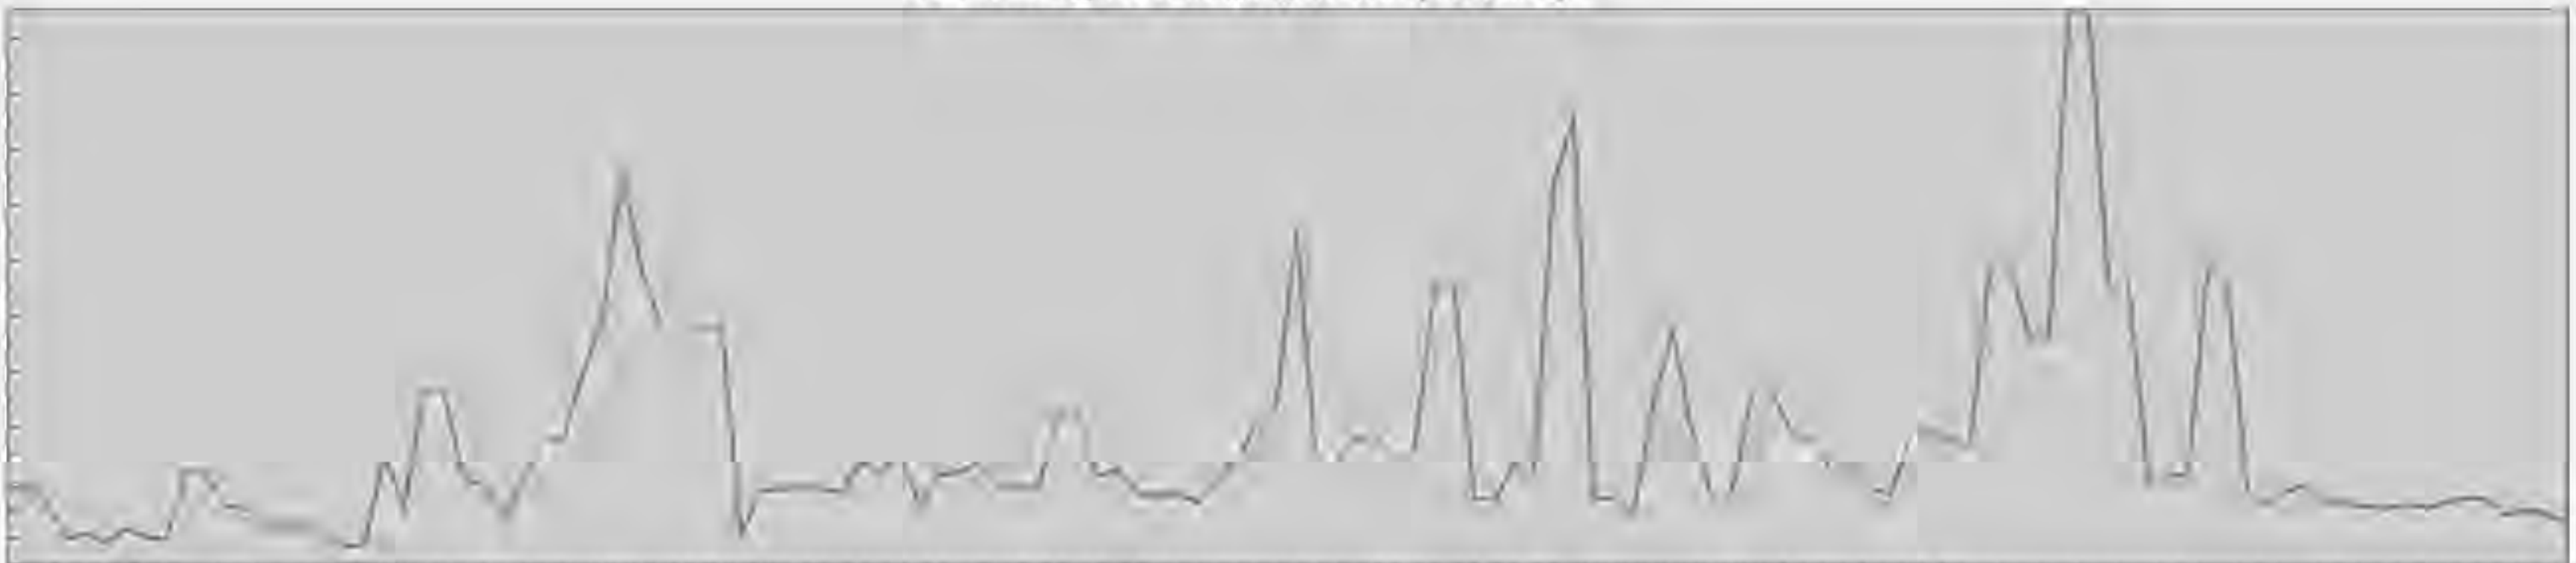

01-PP-M-cells\_GSM190789.CEL  
 02-PP-M-cells\_GSM190790.CEL  
 03-PP-M-cells\_GSM190791.CEL  
 04-CT-Y-M-cells\_GSM190792.CEL  
 05-CT-Y-M-cells\_GSM190793.CEL  
 06-CT-W-M-cells\_GSM190794.CEL  
 07-Ileum-IEC\_GSM190795.CEL  
 08-Ileum-IEC\_GSM190796.CEL  
 09-Ileum-IEC\_GSM190797.CEL  
 10-FAE-RMPYE001001.CEL  
 11-FAE-RMPYE002001.CEL  
 12-Small-intestine-epithelium\_RMINEP001001.CEL  
 13-Small-intestine-epithelium\_RMINEP002001.CEL  
 14-Ileum-IEC\_GSM350371.CEL  
 15-Colon-IEC-Gf\_GSM350375.CEL  
 16-Colon-VIII\_GSM480362.CEL  
 17-Colon-VIII\_GSM480363.CEL  
 18-Colon-VIII\_GSM480364.CEL  
 19-Colon-VIII\_GSM480365.CEL  
 20-Colon-Crypt\_GSM480374.CEL  
 21-Colon-Crypt\_GSM480375.CEL  
 22-Paneth-cells\_GSM318590.CEL  
 23-Paneth-cells\_GSM318589.CEL  
 24-Paneth-cells\_GSM116359.CEL  
 25-Paneth-cells\_GSM116350.CEL  
 26-Paneth-cells-Gf-1\_GSM116357.CEL  
 27-Paneth-cells-Gf-1\_GSM116358.CEL  
 28-Paneth-cells-Gf-1\_GSM116359.CEL  
 29-Bone marrow\_GSM258627.CEL  
 30-Granulocytes\_GSM258667.CEL  
 31-MMP-GSM258665.CEL  
 32-MMP-GSM258666.CEL  
 33-MMP-GSM258667.CEL  
 34-MMP-GSM258668.CEL  
 35-MMP-GSM258669.CEL  
 36-MMP-GSM258670.CEL  
 37-MMP-GSM258671.CEL  
 38-MMP-GSM258672.CEL  
 39-MMP-GSM258673.CEL  
 40-Mast-cells\_GSM258712.CEL  
 41-Mast-cells-Gf-GSM258713.CEL  
 42-Mast-cells-Gf-GSM258714.CEL  
 43-Mast-cells-Gf-GSM258715.CEL  
 44-Mast-cells-Gf-GSM258716.CEL  
 45-Mast-cells-Gf-GSM258717.CEL  
 46-NK-cells\_GSM258731.CEL  
 47-NK-cells-GSM258732.CEL  
 48-CD8a+DC\_GSM258646.CEL  
 49-CD8a+DC\_GSM258647.CEL  
 50-CD8a+DC\_GSM258648.CEL  
 51-CD8a+DC\_GSM258649.CEL  
 52-CD8a+DC\_GSM258650.CEL  
 53-CD8a+DC\_GSM258651.CEL  
 54-CD8a+DC\_GSM258652.CEL  
 55-CD8a+DC\_GSM258653.CEL  
 56-CD8a+DC\_GSM258654.CEL  
 57-CD8a+DC\_GSM258655.CEL  
 58-CD8a+DC\_GSM258656.CEL  
 59-CD8a+DC\_GSM258657.CEL  
 60-CD8a+DC\_GSM258658.CEL  
 61-CD8a+DC\_GSM258659.CEL  
 62-CD8a+DC\_GSM258660.CEL  
 63-CD8a+DC\_GSM258661.CEL  
 64-CD8a+DC\_GSM258662.CEL  
 65-CD8a+DC\_GSM258663.CEL  
 66-CD8a+DC\_GSM258664.CEL  
 67-CD8a+DC\_GSM258665.CEL  
 68-CD8a+DC\_GSM258666.CEL  
 69-CD8a+DC\_GSM258667.CEL  
 70-CD8a+DC\_GSM258668.CEL  
 71-CD8a+DC\_GSM258669.CEL  
 72-CD8a+DC\_GSM258670.CEL  
 73-CD8a+DC\_GSM258671.CEL  
 74-CD8a+DC\_GSM258672.CEL  
 75-CD8a+DC\_GSM258673.CEL  
 76-CD8a+DC\_GSM258674.CEL  
 77-CD8a+DC\_GSM258675.CEL  
 78-CD8a+DC\_GSM258676.CEL  
 79-CD8a+DC\_GSM258677.CEL  
 80-CD8a+DC\_GSM258678.CEL  
 81-CD8a+DC\_GSM258679.CEL  
 82-CD8a+DC\_GSM258680.CEL  
 83-CD8a+DC\_GSM258681.CEL  
 84-CD8a+DC\_GSM258682.CEL  
 85-CD8a+DC\_GSM258683.CEL  
 86-CD8a+DC\_GSM258684.CEL  
 87-CD8a+DC\_GSM258685.CEL  
 88-CD8a+DC\_GSM258686.CEL  
 89-CD8a+DC\_GSM258687.CEL  
 90-CD8a+DC\_GSM258688.CEL  
 91-CD8a+DC\_GSM258689.CEL  
 92-CD8a+DC\_GSM258690.CEL  
 93-CD8a+DC\_GSM258691.CEL  
 94-CD8a+DC\_GSM258692.CEL  
 95-CD8a+DC\_GSM258693.CEL  
 96-CD8a+DC\_GSM258694.CEL  
 97-CD8a+DC\_GSM258695.CEL  
 98-CD8a+DC\_GSM258696.CEL  
 99-CD8a+DC\_GSM258697.CEL  
 100-CD8a+DC\_GSM258698.CEL  
 101-CD8a+DC\_GSM258699.CEL  
 102-CD8a+DC\_GSM258700.CEL  
 103-CD8a+DC\_GSM258701.CEL  
 104-CD8a+DC\_GSM258702.CEL  
 105-CD8a+DC\_GSM258703.CEL  
 106-CD8a+DC\_GSM258704.CEL  
 107-CD8a+DC\_GSM258705.CEL  
 108-CD8a+DC\_GSM258706.CEL  
 109-CD8a+DC\_GSM258707.CEL  
 110-CD8a+DC\_GSM258708.CEL  
 111-CD8a+DC\_GSM258709.CEL  
 112-CD8a+DC\_GSM258710.CEL  
 113-CD8a+DC\_GSM258711.CEL  
 114-CD8a+DC\_GSM258712.CEL  
 115-CD8a+DC\_GSM258713.CEL  
 116-CD8a+DC\_GSM258714.CEL  
 117-CD8a+DC\_GSM258715.CEL  
 118-CD8a+DC\_GSM258716.CEL  
 119-CD8a+DC\_GSM258717.CEL  
 120-CD8a+DC\_GSM258718.CEL  
 121-CD8a+DC\_GSM258719.CEL  
 122-CD8a+DC\_GSM258720.CEL  
 123-CD8a+DC\_GSM258721.CEL  
 124-CD8a+DC\_GSM258722.CEL  
 125-CD8a+DC\_GSM258723.CEL  
 126-CD8a+DC\_GSM258724.CEL  
 127-CD8a+DC\_GSM258725.CEL  
 128-CD8a+DC\_GSM258726.CEL  
 129-CD8a+DC\_GSM258727.CEL  
 130-CD8a+DC\_GSM258728.CEL  
 131-CD8a+DC\_GSM258729.CEL  
 132-CD8a+DC\_GSM258730.CEL  
 133-CD8a+DC\_GSM258731.CEL  
 134-CD8a+DC\_GSM258732.CEL  
 135-CD8a+DC\_GSM258733.CEL  
 136-CD8a+DC\_GSM258734.CEL  
 137-CD8a+DC\_GSM258735.CEL  
 138-CD8a+DC\_GSM258736.CEL  
 139-CD8a+DC\_GSM258737.CEL  
 140-CD8a+DC\_GSM258738.CEL  
 141-CD8a+DC\_GSM258739.CEL  
 142-CD8a+DC\_GSM258740.CEL  
 143-CD8a+DC\_GSM258741.CEL  
 144-CD8a+DC\_GSM258742.CEL  
 145-CD8a+DC\_GSM258743.CEL  
 146-CD8a+DC\_GSM258744.CEL  
 147-CD8a+DC\_GSM258745.CEL  
 148-CD8a+DC\_GSM258746.CEL  
 149-CD8a+DC\_GSM258747.CEL  
 150-CD8a+DC\_GSM258748.CEL  
 151-CD8a+DC\_GSM258749.CEL  
 152-CD8a+DC\_GSM258750.CEL  
 153-CD8a+DC\_GSM258751.CEL  
 154-CD8a+DC\_GSM258752.CEL  
 155-CD8a+DC\_GSM258753.CEL  
 156-CD8a+DC\_GSM258754.CEL  
 157-CD8a+DC\_GSM258755.CEL  
 158-CD8a+DC\_GSM258756.CEL  
 159-CD8a+DC\_GSM258757.CEL  
 160-CD8a+DC\_GSM258758.CEL  
 161-CD8a+DC\_GSM258759.CEL  
 162-CD8a+DC\_GSM258760.CEL  
 163-CD8a+DC\_GSM258761.CEL  
 164-CD8a+DC\_GSM258762.CEL  
 165-CD8a+DC\_GSM258763.CEL  
 166-CD8a+DC\_GSM258764.CEL  
 167-CD8a+DC\_GSM258765.CEL  
 168-CD8a+DC\_GSM258766.CEL  
 169-CD8a+DC\_GSM258767.CEL  
 170-CD8a+DC\_GSM258768.CEL  
 171-CD8a+DC\_GSM258769.CEL  
 172-CD8a+DC\_GSM258770.CEL  
 173-CD8a+DC\_GSM258771.CEL  
 174-CD8a+DC\_GSM258772.CEL  
 175-CD8a+DC\_GSM258773.CEL  
 176-CD8a+DC\_GSM258774.CEL  
 177-CD8a+DC\_GSM258775.CEL  
 178-CD8a+DC\_GSM258776.CEL  
 179-CD8a+DC\_GSM258777.CEL  
 180-CD8a+DC\_GSM258778.CEL  
 181-CD8a+DC\_GSM258779.CEL  
 182-CD8a+DC\_GSM258780.CEL  
 183-CD8a+DC\_GSM258781.CEL  
 184-CD8a+DC\_GSM258782.CEL  
 185-CD8a+DC\_GSM258783.CEL  
 186-CD8a+DC\_GSM258784.CEL  
 187-CD8a+DC\_GSM258785.CEL  
 188-CD8a+DC\_GSM258786.CEL  
 189-CD8a+DC\_GSM258787.CEL  
 190-CD8a+DC\_GSM258788.CEL  
 191-CD8a+DC\_GSM258789.CEL  
 192-CD8a+DC\_GSM258790.CEL  
 193-CD8a+DC\_GSM258791.CEL  
 194-CD8a+DC\_GSM258792.CEL  
 195-CD8a+DC\_GSM258793.CEL  
 196-CD8a+DC\_GSM258794.CEL  
 197-CD8a+DC\_GSM258795.CEL  
 198-CD8a+DC\_GSM258796.CEL  
 199-CD8a+DC\_GSM258797.CEL  
 200-CD8a+DC\_GSM258798.CEL



## Cluster0165\_Mesenchyme-related/extracellular matrix (11 nodes)

909  
861.1  
813.3  
765.4  
717.6  
669.8  
621.9  
574.1  
526.2  
478.4  
430.6  
382.7  
334.9  
287  
239.2  
191.4  
143.5  
95.7  
47.8  
0

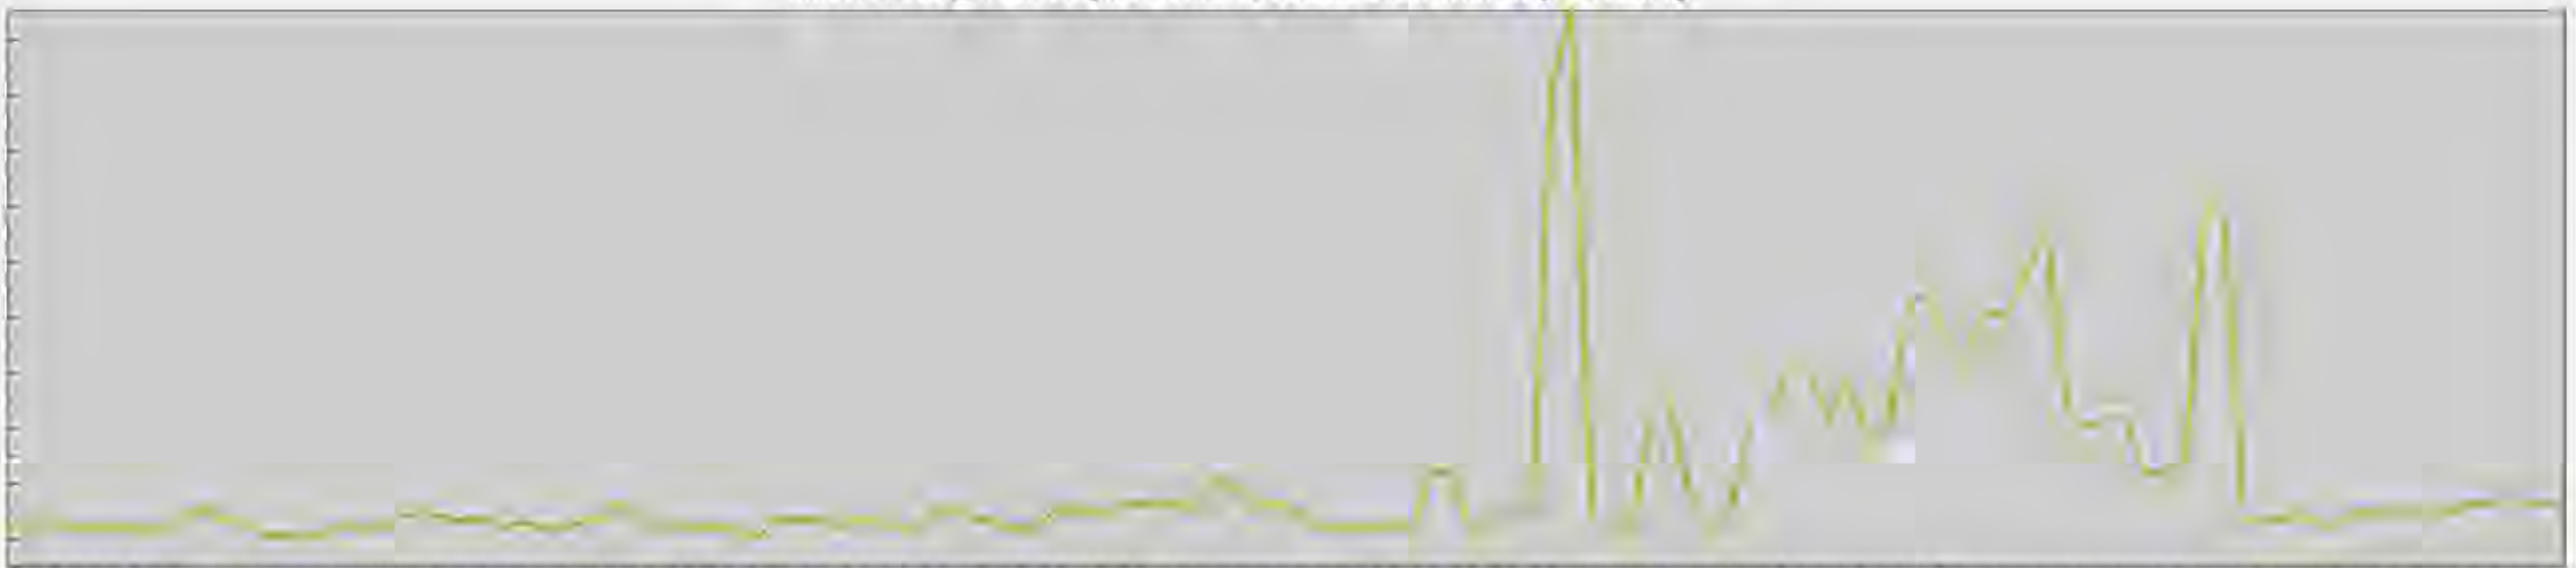

01-PP-M-cells\_GSM190789.CEL  
 02-PP-M-cells\_GSM190790.CEL  
 03-PP-M-cells\_GSM190791.CEL  
 04-CT-v-M-cells\_GSM190792.CEL  
 05-CT-v-M-cells\_GSM190793.CEL  
 06-CT-v-M-cells\_GSM190794.CEL  
 07-Ileum-IEC\_GSM190795.CEL  
 08-Ileum-IEC\_GSM190796.CEL  
 09-Ileum-IEC\_GSM190797.CEL  
 10-FAE-RMPYEP001001.CEL  
 11-FAE-RMPYEP002001.CEL  
 12-Small-intestine-epithelium\_RMINEP001001.CEL  
 13-Small-intestine-epithelium\_RMINEP002001.CEL  
 14-Ileum-IEC\_GSM350371.CEL  
 15-Ileum-IEC\_GSM350375.CEL  
 16-Colon-IEC-Gf\_GSM350376.CEL  
 17-Colon-IEC-Gf\_GSM349880.CEL  
 18-Colon-Vill-GSM480362.CEL  
 19-Colon-Vill-GSM480363.CEL  
 20-Colon-Crypt\_GSM480374.CEL  
 21-Colon-Crypt\_GSM480375.CEL  
 22-Paneth-cells\_GSM318590.CEL  
 23-Paneth-cells\_GSM318589.CEL  
 24-Paneth-cells\_GSM116359.CEL  
 25-Paneth-cells\_GSM116359.CEL  
 26-Paneth-cells-Gf-1-GSM116357.CEL  
 27-Paneth-cells-Gf-1-GSM116357.CEL  
 28-Bone marrow\_GSM258627.CEL  
 29-Bone marrow\_GSM258627.CEL  
 30-HSC\_GSM258770.CEL  
 31-HSC\_GSM258770.CEL  
 32-MEP\_GSM258771.CEL  
 33-MEP\_GSM258771.CEL  
 34-MEP\_GSM258771.CEL  
 35-MEP\_GSM258771.CEL  
 36-MEP\_GSM258771.CEL  
 37-MEP\_GSM258771.CEL  
 38-Granulocytes\_GSM258667.CEL  
 39-Granulocytes\_GSM258667.CEL  
 40-Mast-cells\_GSM258712.CEL  
 41-Mast-cells\_GSM258712.CEL  
 42-Mast-cells-Gf-GSM258713.CEL  
 43-Mast-cells-Gf-GSM258713.CEL  
 44-Mast-cells-Gf-GSM258713.CEL  
 45-Mast-cells-Gf-GSM258713.CEL  
 46-NK-cells\_GSM258732.CEL  
 47-NK-cells\_GSM258732.CEL  
 48-CD8a+DC\_GSM258646.CEL  
 49-CD8a+DC\_GSM258646.CEL  
 50-CD8a+DC\_GSM258647.CEL  
 51-CD8a+DC\_GSM258647.CEL  
 52-CD8a+DC\_GSM258647.CEL  
 53-CD8a+DC\_GSM258647.CEL  
 54-CD8a+DC\_GSM258647.CEL  
 55-CD8a+DC\_GSM258647.CEL  
 56-CD8a+DC\_GSM258647.CEL  
 57-CD8a+DC\_GSM258647.CEL  
 58-CD8a+DC\_GSM258647.CEL  
 59-CD8a+DC\_GSM258647.CEL  
 60-CD8a+DC\_GSM258647.CEL  
 61-CD8a+DC\_GSM258647.CEL  
 62-Microglia\_GSM258721.CEL  
 63-Microglia\_GSM258721.CEL  
 64-Microglia\_GSM258721.CEL  
 65-Osteoclasts\_GSM258743.CEL  
 66-Osteoclasts\_GSM258743.CEL  
 67-Thymocyte-DN\_GSM465595.CEL  
 68-Thymocyte-DN\_GSM465595.CEL  
 69-T-cells-CD4+\_GSM258773.CEL  
 70-T-cells-CD4+\_GSM258773.CEL  
 71-T-cells-CD8+\_GSM258776.CEL  
 72-T-cells-CD8+\_GSM258776.CEL  
 73-Tregs\_GSM258778.CEL  
 74-Tregs\_GSM258778.CEL  
 75-Tregs\_GSM258778.CEL  
 76-Tregs\_GSM258778.CEL  
 77-Tregs\_GSM258778.CEL  
 78-Tregs\_GSM258778.CEL  
 79-Tregs\_GSM258778.CEL  
 80-Tregs\_GSM258778.CEL  
 81-Tregs\_GSM258778.CEL  
 82-Tregs\_GSM258778.CEL  
 83-Tregs\_GSM258778.CEL  
 84-Tregs\_GSM258778.CEL  
 85-Tregs\_GSM258778.CEL  
 86-Tregs\_GSM258778.CEL  
 87-Tregs\_GSM258778.CEL  
 88-Tregs\_GSM258778.CEL  
 89-Tregs\_GSM258778.CEL  
 90-Tregs\_GSM258778.CEL  
 91-Tregs\_GSM258778.CEL  
 92-Tregs\_GSM258778.CEL  
 93-Tregs\_GSM258778.CEL  
 94-Tregs\_GSM258778.CEL  
 95-Tregs\_GSM258778.CEL  
 96-Tregs\_GSM258778.CEL  
 97-Tregs\_GSM258778.CEL  
 98-Tregs\_GSM258778.CEL  
 99-Tregs\_GSM258778.CEL  
 100-Tregs\_GSM258778.CEL  
 101-Tregs\_GSM258778.CEL  
 102-Tregs\_GSM258778.CEL  
 103-Tregs\_GSM258778.CEL  
 104-Tregs\_GSM258778.CEL  
 105-Tregs\_GSM258778.CEL  
 106-Tregs\_GSM258778.CEL  
 107-Tregs\_GSM258778.CEL  
 108-Tregs\_GSM258778.CEL  
 109-Tregs\_GSM258778.CEL  
 110-Tregs\_GSM258778.CEL  
 111-Tregs\_GSM258778.CEL  
 112-Tregs\_GSM258778.CEL  
 113-Tregs\_GSM258778.CEL  
 114-Tregs\_GSM258778.CEL  
 115-Tregs\_GSM258778.CEL  
 116-Tregs\_GSM258778.CEL  
 117-Tregs\_GSM258778.CEL  
 118-Tregs\_GSM258778.CEL  
 119-Tregs\_GSM258778.CEL  
 120-Tregs\_GSM258778.CEL  
 121-Tregs\_GSM258778.CEL  
 122-Tregs\_GSM258778.CEL  
 123-Tregs\_GSM258778.CEL  
 124-Tregs\_GSM258778.CEL  
 125-Tregs\_GSM258778.CEL  
 126-Tregs\_GSM258778.CEL  
 127-Tregs\_GSM258778.CEL  
 128-Tregs\_GSM258778.CEL  
 129-Tregs\_GSM258778.CEL  
 130-Tregs\_GSM258778.CEL



Cluster0166\_Large intestine-related (11 nodes)

1,425.8  
1,350.8  
1,275.7  
1,200.7  
1,125.6  
1,050.6  
975.6  
900.5  
825.5  
750.4  
675.4  
600.3  
525.3  
450.3  
375.2  
300.2  
225.1  
150.1  
75  
0

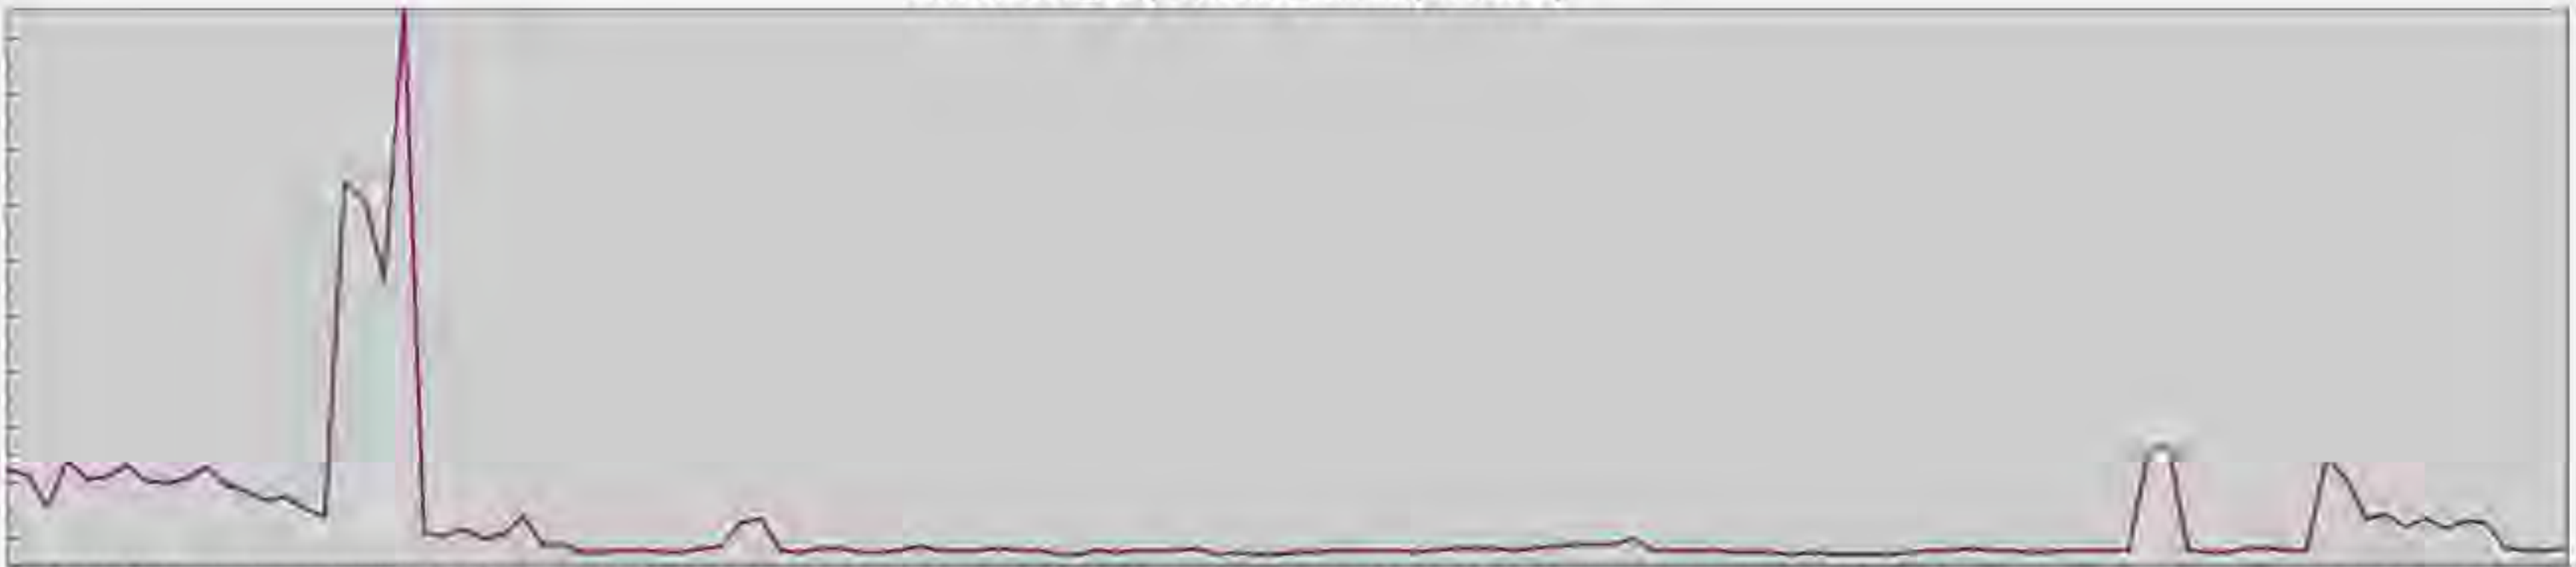

01-PP-M-cells\_GSM190789.CEL  
 02-PP-M-cells\_GSM190790.CEL  
 03-PP-M-cells\_GSM190791.CEL  
 04-CT-v-M-cells\_GSM190792.CEL  
 05-CT-v-M-cells\_GSM190793.CEL  
 06-CT-v-M-cells\_GSM190794.CEL  
 07-Ileum-EC\_GSM190795.CEL  
 08-Ileum-EC\_GSM190796.CEL  
 09-Ileum-EC\_GSM190797.CEL  
 10-FAE-RMPYEP001001.CEL  
 11-FAE-RMPYEP002001.CEL  
 12-Small-intestine-epithelium\_RMINEP001001.CEL  
 13-Small-intestine-epithelium\_RMINEP002001.CEL  
 14-Ileum-EC\_GSM350371.CEL  
 15-Ileum-EC\_GSM350375.CEL  
 16-Color-EC\_GSM350376.CEL  
 17-Color-EC\_GSM349880.CEL  
 18-Color-Vill\_GSM480362.CEL  
 19-Color-Vill\_GSM480363.CEL  
 20-Color-Crypt\_GSM480374.CEL  
 21-Color-Crypt\_GSM480375.CEL  
 22-Paneth-cells\_GSM318590.CEL  
 23-Paneth-cells\_GSM318591.CEL  
 24-Paneth-cells\_GSM116359.CEL  
 25-Paneth-cells\_GSM116359.CEL  
 26-Paneth-cells-GF-1-GSM116357.CEL  
 27-Paneth-cells-GF-1-GSM116358.CEL  
 28-Paneth-cells-GF-1-GSM116357.CEL  
 29-Bone marrow\_GSM258627.CEL  
 30-HSC\_GSM258770.CEL  
 31-HSC\_GSM258771.CEL  
 32-MEP\_GSM258772.CEL  
 33-MEP\_GSM258773.CEL  
 34-MEP\_GSM258774.CEL  
 35-MEP\_GSM258775.CEL  
 36-MEP\_GSM258776.CEL  
 37-MEP\_GSM258777.CEL  
 38-MEP\_GSM258778.CEL  
 39-Granulocytes\_GSM258667.CEL  
 40-Mast-cells\_GSM258712.CEL  
 41-Mast-cells\_GSM258713.CEL  
 42-Mast-cells-IdU+Ad-GSM258714.CEL  
 43-Mast-cells-IdU+Ad-GSM258714.CEL  
 44-Mast-cells-IdU+Ad-GSM258714.CEL  
 45-Mast-cells-IdU+Ad-GSM258718.CEL  
 46-NK-cells\_GSM258732.CEL  
 47-NK-cells\_GSM258732.CEL  
 48-CD8a+DC\_GSM258646.CEL  
 49-CD8a+DC\_GSM258646.CEL  
 50-CD8a-DC\_GSM258647.CEL  
 51-CD8a-DC\_GSM258647.CEL  
 52-Plasmacytoid-DC\_GSM258649.CEL  
 53-Plasmacytoid-DC\_GSM258649.CEL  
 54-BMM-GSM258694.CEL  
 55-BMM-GSM258694.CEL  
 56-BMM-LPS-6h-GSM258700.CEL  
 57-BMM-LPS-6h-GSM258700.CEL  
 58-BMM-LPS-7h-GSM258702.CEL  
 59-BMM-LPS-7h-GSM258702.CEL  
 60-PP-7h-GSM258706.CEL  
 61-PP-7h-GSM258706.CEL  
 62-Microglia\_GSM258721.CEL  
 63-Microglia\_GSM258721.CEL  
 64-Osteoclasts\_GSM258743.CEL  
 65-Osteoclasts\_GSM258743.CEL  
 66-Thymocyte-DN\_GSM465595.CEL  
 67-T-cells-CD4+GSM258773.CEL  
 68-T-cells-CD4+GSM258773.CEL  
 69-T-cells-CD8+GSM258775.CEL  
 70-T-cells-CD8+GSM258775.CEL  
 71-Tregs\_GSM258778.CEL  
 72-Tregs\_GSM258778.CEL  
 73-BAF3\_GSM258620.CEL  
 74-BAF3\_GSM258620.CEL  
 75-MZ-Bcell\_GSM258622.CEL  
 76-MZ-Bcell\_GSM258622.CEL  
 77-Follicular-Bcells\_GSM258664.CEL  
 78-Follicular-Bcells\_GSM258664.CEL  
 79-F-LY-RMLNDC002001.CEL  
 80-F-LY-RMLNDC003001.CEL  
 81-PP-FDC\_GSM481976.CEL  
 82-PP-FDC\_GSM481976.CEL  
 83-PP-FDC\_GSM481977.CEL  
 84-Lymph-endo-cells\_GSM143704.CEL  
 85-MS-1\_GSM234692.CEL  
 86-LTcell\_GSM465596.CEL  
 87-Nat Helper cell\_GSM465593.CEL  
 88-Nat Helper cell\_GSM465594.CEL  
 89-Chondrocytes\_GSM266741.CEL  
 90-Chondrocytes\_GSM266741.CEL  
 91-Osteoblast-d5\_GSM258741.CEL  
 92-Osteoblast-d5\_GSM258742.CEL  
 93-Osteoblast-d14\_GSM258737.CEL  
 94-Osteoblast-d14\_GSM258738.CEL  
 95-Osteoblast-d21\_GSM258739.CEL  
 96-Osteoblast-d21\_GSM258739.CEL  
 97-10T12\_GSM258631.CEL  
 98-10T12\_GSM258632.CEL  
 99-3T3-L1\_GSM258610.CEL  
 100-3T3-L1\_GSM258610.CEL  
 101-NH3T3\_GSM258739.CEL  
 102-NH3T3\_GSM258739.CEL  
 103-C2C12\_GSM258629.CEL  
 104-C2C12\_GSM258630.CEL  
 106-Bruce4\_GSM258690.CEL  
 107-MIMCD3\_GSM258724.CEL  
 108-MIMCD3\_GSM258724.CEL  
 109-mim6\_GSM258725.CEL  
 110-mim6\_GSM258725.CEL  
 111-Astrocytes\_GSM241898.CEL  
 112-Astrocytes\_GSM241898.CEL  
 113-Spleen\_GSM258767.CEL  
 114-Spleen\_GSM258767.CEL  
 115-Spleen\_GSM258768.CEL  
 116-Lymph-nodes\_GSM258691.CEL  
 117-Lymph-nodes\_GSM258691.CEL  
 118-Intestine-small\_GSM258677.CEL  
 119-Intestine-small\_GSM258677.CEL  
 120-Intestine-large\_GSM258675.CEL  
 121-Intestine-large\_GSM258675.CEL  
 122-Intestine-large\_GSM258676.CEL  
 123-Intestine-large\_GSM258676.CEL  
 124-Intestine-large\_GSM258677.CEL  
 125-Intestine-large\_GSM258677.CEL  
 126-Intestine-large\_GSM258678.CEL  
 127-Intestine-large\_GSM258678.CEL  
 128-NALT\_GSM289409.CEL  
 129-NALT\_GSM289410.CEL  
 130-NALT\_GSM289411.CEL  
 131-Intestine-large\_GSM258675.CEL  
 132-Intestine-large\_GSM258675.CEL  
 133-Intestine-large\_GSM258676.CEL  
 134-Intestine-large\_GSM258676.CEL  
 135-Intestine-large\_GSM258677.CEL  
 136-Intestine-large\_GSM258677.CEL  
 137-Intestine-large\_GSM258678.CEL  
 138-Intestine-large\_GSM258678.CEL  
 139-Intestine-large\_GSM258679.CEL  
 140-Intestine-large\_GSM258679.CEL  
 141-Intestine-large\_GSM258680.CEL  
 142-Intestine-large\_GSM258680.CEL  
 143-Intestine-large\_GSM258681.CEL  
 144-Intestine-large\_GSM258681.CEL  
 145-Intestine-large\_GSM258682.CEL  
 146-Intestine-large\_GSM258682.CEL  
 147-Intestine-large\_GSM258683.CEL  
 148-Intestine-large\_GSM258683.CEL  
 149-Intestine-large\_GSM258684.CEL  
 150-Intestine-large\_GSM258684.CEL  
 151-Intestine-large\_GSM258685.CEL  
 152-Intestine-large\_GSM258685.CEL  
 153-Intestine-large\_GSM258686.CEL  
 154-Intestine-large\_GSM258686.CEL  
 155-Intestine-large\_GSM258687.CEL  
 156-Intestine-large\_GSM258687.CEL  
 157-Intestine-large\_GSM258688.CEL  
 158-Intestine-large\_GSM258688.CEL  
 159-Intestine-large\_GSM258689.CEL  
 160-Intestine-large\_GSM258689.CEL  
 161-Intestine-large\_GSM258690.CEL  
 162-Intestine-large\_GSM258690.CEL  
 163-Intestine-large\_GSM258691.CEL  
 164-Intestine-large\_GSM258691.CEL  
 165-Intestine-large\_GSM258692.CEL  
 166-Intestine-large\_GSM258692.CEL  
 167-Intestine-large\_GSM258693.CEL  
 168-Intestine-large\_GSM258693.CEL  
 169-Intestine-large\_GSM258694.CEL  
 170-Intestine-large\_GSM258694.CEL  
 171-Intestine-large\_GSM258695.CEL  
 172-Intestine-large\_GSM258695.CEL  
 173-Intestine-large\_GSM258696.CEL  
 174-Intestine-large\_GSM258696.CEL  
 175-Intestine-large\_GSM258697.CEL  
 176-Intestine-large\_GSM258697.CEL  
 177-Intestine-large\_GSM258698.CEL  
 178-Intestine-large\_GSM258698.CEL  
 179-Intestine-large\_GSM258699.CEL  
 180-Intestine-large\_GSM258699.CEL  
 181-Intestine-large\_GSM258700.CEL  
 182-Intestine-large\_GSM258700.CEL  
 183-Intestine-large\_GSM258701.CEL  
 184-Intestine-large\_GSM258701.CEL  
 185-Intestine-large\_GSM258702.CEL  
 186-Intestine-large\_GSM258702.CEL  
 187-Intestine-large\_GSM258703.CEL  
 188-Intestine-large\_GSM258703.CEL  
 189-Intestine-large\_GSM258704.CEL  
 190-Intestine-large\_GSM258704.CEL  
 191-Intestine-large\_GSM258705.CEL  
 192-Intestine-large\_GSM258705.CEL  
 193-Intestine-large\_GSM258706.CEL  
 194-Intestine-large\_GSM258706.CEL  
 195-Intestine-large\_GSM258707.CEL  
 196-Intestine-large\_GSM258707.CEL  
 197-Intestine-large\_GSM258708.CEL  
 198-Intestine-large\_GSM258708.CEL  
 199-Intestine-large\_GSM258709.CEL  
 200-Intestine-large\_GSM258709.CEL



Cluster0167\_Uncertain (11 nodes)

1,036.2  
981.6  
927.1  
872.5  
818  
763.5  
708.9  
654.4  
599.9  
545.3  
490.8  
436.3  
381.7  
327.2  
272.7  
218.1  
163.6  
109.1  
54.5  
0

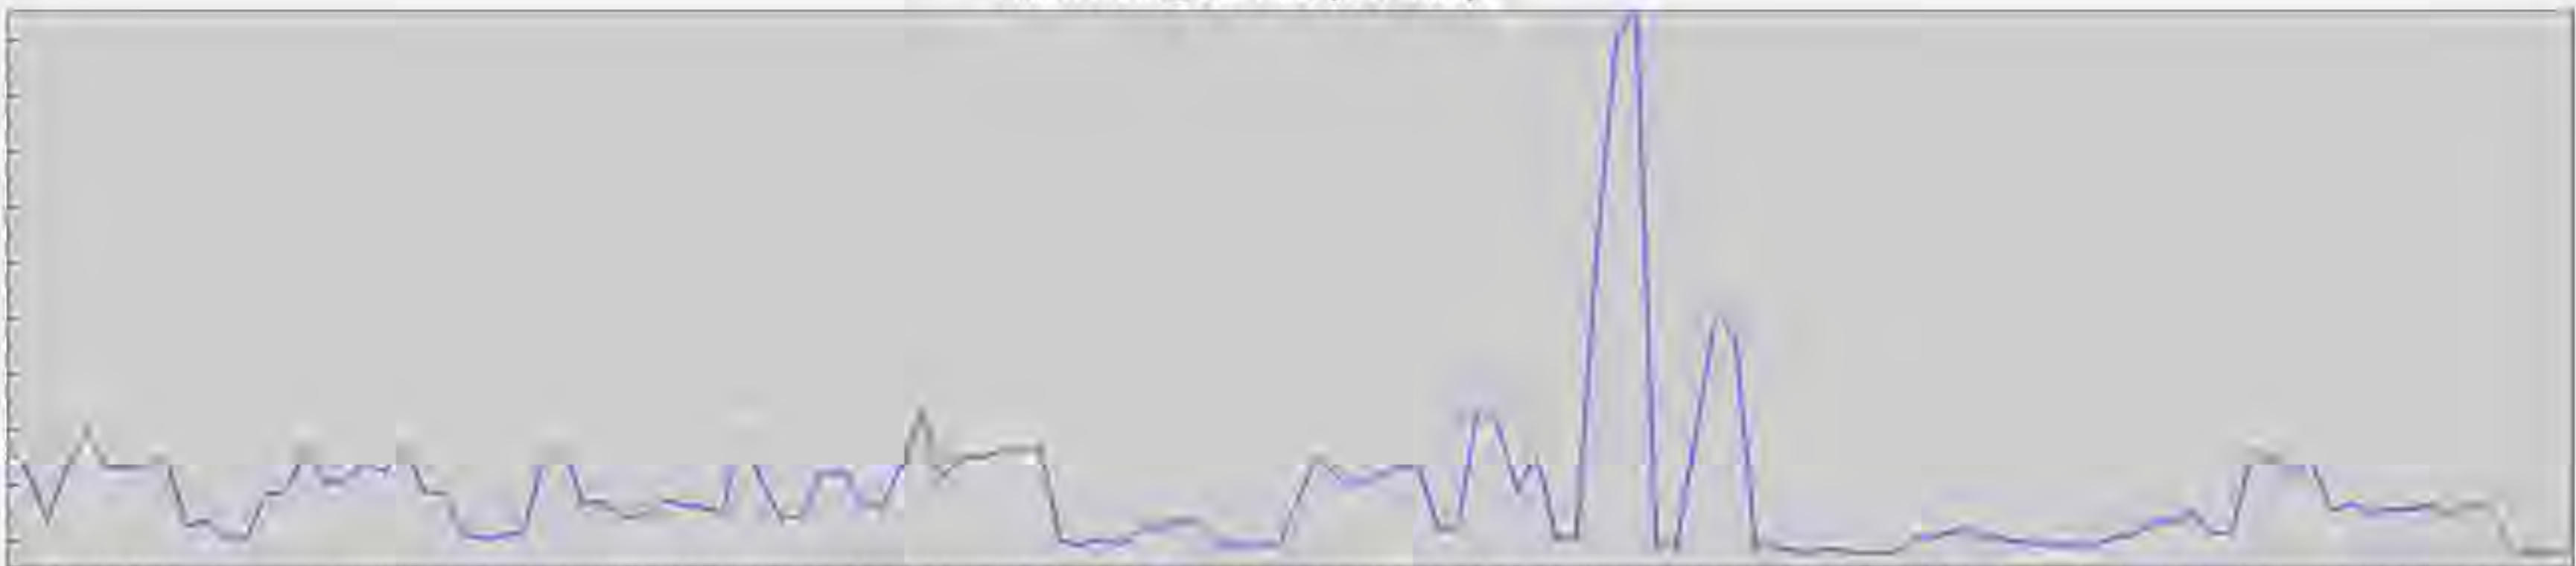

|                                                |                                     |
|------------------------------------------------|-------------------------------------|
| 01-PP-M-cells_GSM190789.CEL                    | 130-NALT_GSM289411.CEL              |
| 02-PP-M-cells_GSM190790.CEL                    | 129-NALT_GSM289410.CEL              |
| 03-PP-M-cells_GSM190791.CEL                    | 128-NALT_GSM289409.CEL              |
| 04-CT-v-M-cells_GSM190792.CEL                  | 127-NALT_GSM289408.CEL              |
| 05-CT-v-M-cells_GSM190793.CEL                  | 126-Colon-d9-GSM1988105.CEL         |
| 06-CT-v-M-cells_GSM190794.CEL                  | 125-Colon-d9-GSM1988104.CEL         |
| 07-Ileum-IEC_GSM190795.CEL                     | 124-Colon-d9-GSM1988103.CEL         |
| 08-Ileum-IEC_GSM190796.CEL                     | 123-Colon-d4-GSM1988102.CEL         |
| 09-Ileum-IEC_GSM190797.CEL                     | 122-Intestine-large_GSM258676.CEL   |
| 10-FAE-RMPYEP001001.CEL                        | 121-Intestine-large_GSM258675.CEL   |
| 11-FAE-RMPYEP002001.CEL                        | 120-Intestine-small_GSM258678.CEL   |
| 12-Small-intestine-epithelium_RMINEP001001.CEL | 119-Intestine-small_GSM258692.CEL   |
| 13-Small-intestine-epithelium_RMINEP002001.CEL | 118-Lymph-nodes_GSM258691.CEL       |
| 14-Ileum-IEC_GSM350371.CEL                     | 117-Lymph-nodes_GSM258726.CEL       |
| 15-Ileum-IEC_GSM350375.CEL                     | 116-Spleen_GSM258768.CEL            |
| 16-Intestine-IEC_GSM349880.CEL                 | 115-Spleen_GSM258767.CEL            |
| 17-Intestine-IEC_GSM350375.CEL                 | 114-Neuro2a_GSM258728.CEL           |
| 18-Intestine-IEC_GSM350375.CEL                 | 113-Neuro2a_GSM258727.CEL           |
| 19-Intestine-IEC_GSM350375.CEL                 | 112-Astrocytes_GSM241898.CEL        |
| 20-Intestine-IEC_GSM350375.CEL                 | 111-Astrocytes_GSM241898.CEL        |
| 21-Intestine-IEC_GSM350375.CEL                 | 110-mim6_GSM258725.CEL              |
| 22-Intestine-IEC_GSM350375.CEL                 | 109-mim6_GSM258725.CEL              |
| 23-Intestine-IEC_GSM350375.CEL                 | 108-MIMCD3_GSM258724.CEL            |
| 24-Intestine-IEC_GSM350375.CEL                 | 107-MIMCD3_GSM258723.CEL            |
| 25-Intestine-IEC_GSM350375.CEL                 | 106-Bruce4-GSM258656.CEL            |
| 26-Intestine-IEC_GSM350375.CEL                 | 105-Bruce4-GSM258655.CEL            |
| 27-Intestine-IEC_GSM350375.CEL                 | 104-C2C12-GSM258690.CEL             |
| 28-Intestine-IEC_GSM350375.CEL                 | 103-C2C12-GSM258689.CEL             |
| 29-Intestine-IEC_GSM350375.CEL                 | 102-NH3T3-GSM258739.CEL             |
| 30-Intestine-IEC_GSM350375.CEL                 | 101-NH3T3-GSM258739.CEL             |
| 31-Intestine-IEC_GSM350375.CEL                 | 100-3T3-L1_GSM258610.CEL            |
| 32-Intestine-IEC_GSM350375.CEL                 | 99-3T3-L1_GSM258609.CEL             |
| 33-Intestine-IEC_GSM350375.CEL                 | 98-10T12-GSM258632.CEL              |
| 34-Intestine-IEC_GSM350375.CEL                 | 97-10T12-GSM258631.CEL              |
| 35-Intestine-IEC_GSM350375.CEL                 | 96-Osteoblast-d21-GSM258740.CEL     |
| 36-Intestine-IEC_GSM350375.CEL                 | 95-Osteoblast-d21-GSM258739.CEL     |
| 37-Intestine-IEC_GSM350375.CEL                 | 94-Osteoblast-d14-GSM258738.CEL     |
| 38-Intestine-IEC_GSM350375.CEL                 | 93-Osteoblast-d14-GSM258737.CEL     |
| 39-Intestine-IEC_GSM350375.CEL                 | 92-Osteoblast-d5-GSM258742.CEL      |
| 40-Intestine-IEC_GSM350375.CEL                 | 91-Osteoblast-d5-GSM258741.CEL      |
| 41-Intestine-IEC_GSM350375.CEL                 | 90-Chondrocytes_GSM266741.CEL       |
| 42-Intestine-IEC_GSM350375.CEL                 | 89-Nat Helper cell_GSM465594.CEL    |
| 43-Intestine-IEC_GSM350375.CEL                 | 88-Nat Helper cell_GSM465593.CEL    |
| 44-Intestine-IEC_GSM350375.CEL                 | 87-LT cell_GSM465596.CEL            |
| 45-Intestine-IEC_GSM350375.CEL                 | 86-LT cell_GSM465596.CEL            |
| 46-Intestine-IEC_GSM350375.CEL                 | 85-MS-1_GSM234692.CEL               |
| 47-Intestine-IEC_GSM350375.CEL                 | 84-Lymph-endo-cells_GSM143704.CEL   |
| 48-Intestine-IEC_GSM350375.CEL                 | 83-PP-FDC_GSM481978.CEL             |
| 49-Intestine-IEC_GSM350375.CEL                 | 82-PP-FDC_GSM481978.CEL             |
| 50-Intestine-IEC_GSM350375.CEL                 | 81-PP-FDC_GSM481978.CEL             |
| 51-Intestine-IEC_GSM350375.CEL                 | 80-LY-RMLNDC002001.CEL              |
| 52-Intestine-IEC_GSM350375.CEL                 | 79-LY-RMLNDC002001.CEL              |
| 53-Intestine-IEC_GSM350375.CEL                 | 78-Follicular-B-cells_GSM258664.CEL |
| 54-Intestine-IEC_GSM350375.CEL                 | 77-Follicular-B-cells_GSM258664.CEL |
| 55-Intestine-IEC_GSM350375.CEL                 | 76-MZ-Bcell_GSM258622.CEL           |
| 56-Intestine-IEC_GSM350375.CEL                 | 75-MZ-Bcell_GSM258621.CEL           |
| 57-Intestine-IEC_GSM350375.CEL                 | 74-BAF3_GSM258620.CEL               |
| 58-Intestine-IEC_GSM350375.CEL                 | 73-BAF3_GSM258619.CEL               |
| 59-Intestine-IEC_GSM350375.CEL                 | 72-Tregs_GSM258778.CEL              |
| 60-Intestine-IEC_GSM350375.CEL                 | 71-Tregs_GSM258777.CEL              |
| 61-Intestine-IEC_GSM350375.CEL                 | 70-T-cells-CD8+GSM258776.CEL        |
| 62-Intestine-IEC_GSM350375.CEL                 | 69-T-cells-CD8+GSM258774.CEL        |
| 63-Intestine-IEC_GSM350375.CEL                 | 68-T-cells-CD4+GSM258773.CEL        |
| 64-Intestine-IEC_GSM350375.CEL                 | 67-T-cells-CD4+GSM258744.CEL        |
| 65-Intestine-IEC_GSM350375.CEL                 | 66-Thymocyte-DN_GSM465595.CEL       |
| 66-Intestine-IEC_GSM350375.CEL                 | 65-Osteoclasts_GSM258743.CEL        |
| 67-Intestine-IEC_GSM350375.CEL                 | 64-Microglia_GSM258721.CEL          |
| 68-Intestine-IEC_GSM350375.CEL                 | 63-Microglia_GSM258721.CEL          |
| 69-Intestine-IEC_GSM350375.CEL                 | 62-MM-PS-7h_GSM268706.CEL           |
| 70-Intestine-IEC_GSM350375.CEL                 | 61-MM-PS-7h_GSM268706.CEL           |
| 71-Intestine-IEC_GSM350375.CEL                 | 60-MM-PS-6h_GSM268700.CEL           |
| 72-Intestine-IEC_GSM350375.CEL                 | 59-MM-PS-6h_GSM268699.CEL           |
| 73-Intestine-IEC_GSM350375.CEL                 | 58-MM-LPS-6h_GSM268699.CEL          |
| 74-Intestine-IEC_GSM350375.CEL                 | 57-MM-LPS-6h_GSM268699.CEL          |
| 75-Intestine-IEC_GSM350375.CEL                 | 56-MM-LPS-6h_GSM268699.CEL          |
| 76-Intestine-IEC_GSM350375.CEL                 | 55-MM-LPS-6h_GSM268699.CEL          |
| 77-Intestine-IEC_GSM350375.CEL                 | 54-MM-LPS-6h_GSM268699.CEL          |
| 78-Intestine-IEC_GSM350375.CEL                 | 53-MM-LPS-6h_GSM268699.CEL          |
| 79-Intestine-IEC_GSM350375.CEL                 | 52-MM-LPS-6h_GSM268699.CEL          |
| 80-Intestine-IEC_GSM350375.CEL                 | 51-MM-LPS-6h_GSM268699.CEL          |
| 81-Intestine-IEC_GSM350375.CEL                 | 50-MM-LPS-6h_GSM268699.CEL          |
| 82-Intestine-IEC_GSM350375.CEL                 | 49-CD8a+DC_GSM258646.CEL            |
| 83-Intestine-IEC_GSM350375.CEL                 | 48-CD8a+DC_GSM258646.CEL            |
| 84-Intestine-IEC_GSM350375.CEL                 | 47-NK-cells_GSM258732.CEL           |
| 85-Intestine-IEC_GSM350375.CEL                 | 46-NK-cells_GSM258731.CEL           |
| 86-Intestine-IEC_GSM350375.CEL                 | 45-Mast-cells-IgE+Ad-GSM258719.CEL  |
| 87-Intestine-IEC_GSM350375.CEL                 | 44-Mast-cells-IgE+Ad-GSM258717.CEL  |
| 88-Intestine-IEC_GSM350375.CEL                 | 43-Mast-cells-IgE-GSM258714.CEL     |
| 89-Intestine-IEC_GSM350375.CEL                 | 42-Mast-cells-IgE-GSM258713.CEL     |
| 90-Intestine-IEC_GSM350375.CEL                 | 41-Mast-cells-GSM258712.CEL         |
| 91-Intestine-IEC_GSM350375.CEL                 | 40-Granulocytes_GSM258668.CEL       |
| 92-Intestine-IEC_GSM350375.CEL                 | 39-Granulocytes_GSM258667.CEL       |
| 93-Intestine-IEC_GSM350375.CEL                 | 38-GMP_GSM258666.CEL                |
| 94-Intestine-IEC_GSM350375.CEL                 | 37-GMP_GSM258666.CEL                |
| 95-Intestine-IEC_GSM350375.CEL                 | 36-GMP_GSM258666.CEL                |
| 96-Intestine-IEC_GSM350375.CEL                 | 35-GMP_GSM258666.CEL                |
| 97-Intestine-IEC_GSM350375.CEL                 | 34-MEP-GSM258642.CEL                |
| 98-Intestine-IEC_GSM350375.CEL                 | 33-MEP-GSM258642.CEL                |
| 99-Intestine-IEC_GSM350375.CEL                 | 32-MEP-GSM258642.CEL                |
| 100-Intestine-IEC_GSM350375.CEL                | 31-MEP-GSM258642.CEL                |
| 101-Intestine-IEC_GSM350375.CEL                | 30-HSC_GSM258770.CEL                |
| 102-Intestine-IEC_GSM350375.CEL                | 29-HSC_GSM258770.CEL                |
| 103-Intestine-IEC_GSM350375.CEL                | 28-Bone marrow_GSM258628.CEL        |
| 104-Intestine-IEC_GSM350375.CEL                | 27-Bone marrow_GSM258627.CEL        |
| 105-Intestine-IEC_GSM350375.CEL                | 26-Paneth-cells-GE-GSM116357.CEL    |
| 106-Intestine-IEC_GSM350375.CEL                | 25-Paneth-cells-GE-GSM116357.CEL    |
| 107-Intestine-IEC_GSM350375.CEL                | 24-Paneth-cells-GE-GSM116359.CEL    |
| 108-Intestine-IEC_GSM350375.CEL                | 23-Paneth-cells-GE-GSM116359.CEL    |
| 109-Intestine-IEC_GSM350375.CEL                | 22-Paneth-cells-GE-GSM116359.CEL    |
| 110-Intestine-IEC_GSM350375.CEL                | 21-Intestine-IEC_GSM480375.CEL      |
| 111-Intestine-IEC_GSM350375.CEL                | 20-Intestine-IEC_GSM480375.CEL      |
| 112-Intestine-IEC_GSM350375.CEL                | 19-Intestine-IEC_GSM480375.CEL      |
| 113-Intestine-IEC_GSM350375.CEL                | 18-Intestine-IEC_GSM480375.CEL      |
| 114-Intestine-IEC_GSM350375.CEL                | 17-Intestine-IEC_GSM480375.CEL      |
| 115-Intestine-IEC_GSM350375.CEL                | 16-Intestine-IEC_GSM480375.CEL      |
| 116-Intestine-IEC_GSM350375.CEL                | 15-Intestine-IEC_GSM480375.CEL      |
| 117-Intestine-IEC_GSM350375.CEL                | 14-Intestine-IEC_GSM480375.CEL      |
| 118-Intestine-IEC_GSM350375.CEL                | 13-Intestine-IEC_GSM480375.CEL      |
| 119-Intestine-IEC_GSM350375.CEL                | 12-Intestine-IEC_GSM480375.CEL      |
| 120-Intestine-IEC_GSM350375.CEL                | 11-Intestine-IEC_GSM480375.CEL      |
| 121-Intestine-IEC_GSM350375.CEL                | 10-Intestine-IEC_GSM480375.CEL      |
| 122-Intestine-IEC_GSM350375.CEL                | 9-Intestine-IEC_GSM480375.CEL       |
| 123-Intestine-IEC_GSM350375.CEL                | 8-Intestine-IEC_GSM480375.CEL       |
| 124-Intestine-IEC_GSM350375.CEL                | 7-Intestine-IEC_GSM480375.CEL       |
| 125-Intestine-IEC_GSM350375.CEL                | 6-Intestine-IEC_GSM480375.CEL       |
| 126-Intestine-IEC_GSM350375.CEL                | 5-Intestine-IEC_GSM480375.CEL       |
| 127-Intestine-IEC_GSM350375.CEL                | 4-Intestine-IEC_GSM480375.CEL       |
| 128-Intestine-IEC_GSM350375.CEL                | 3-Intestine-IEC_GSM480375.CEL       |
| 129-Intestine-IEC_GSM350375.CEL                | 2-Intestine-IEC_GSM480375.CEL       |
| 130-Intestine-IEC_GSM350375.CEL                | 1-Intestine-IEC_GSM480375.CEL       |



Cluster0168\_High in classical DC (11 nodes)

317.3  
300.6  
283.9  
267.2  
250.5  
233.8  
217.1  
200.4  
183.7  
167  
150.3  
133.6  
116.9  
100.2  
83.5  
66.8  
50.1  
33.4  
16.7  
0

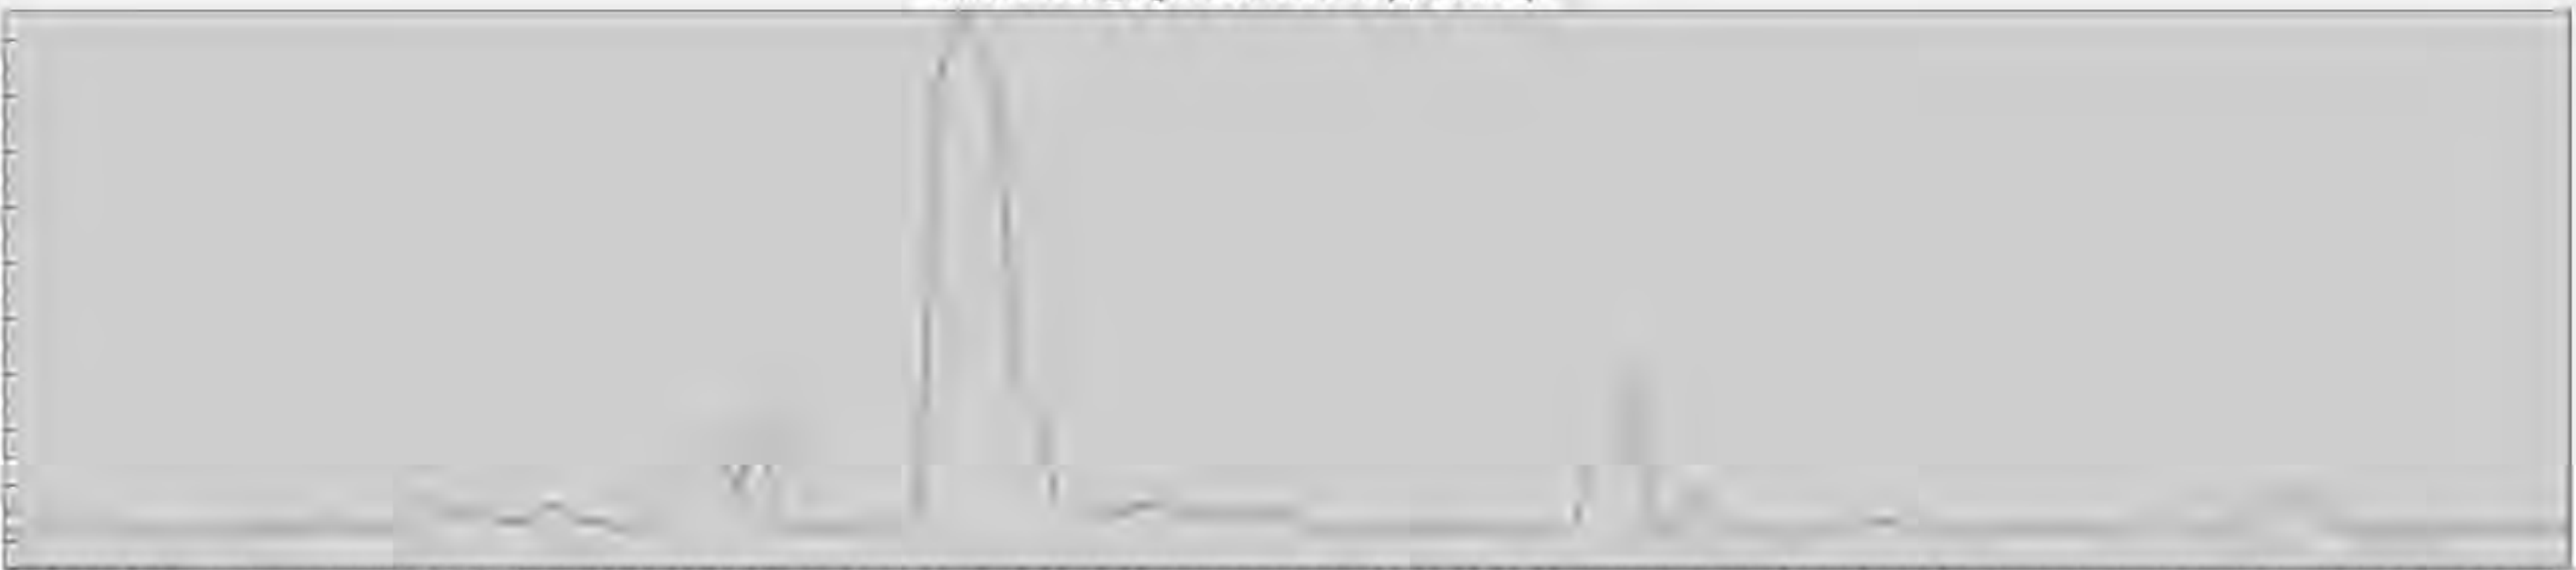

|     |                            |              |     |
|-----|----------------------------|--------------|-----|
| 30  | NALT                       | GSM289411    | CEL |
| 129 | NALT                       | GSM289410    | CEL |
| 128 | NALT                       | GSM289409    | CEL |
| 127 | NALT                       | GSM289408    | CEL |
| 126 | Colon-d9                   | GSM1988104   | CEL |
| 125 | Colon-d9                   | GSM1988103   | CEL |
| 124 | Colon-d9                   | GSM1988102   | CEL |
| 123 | Colon-d4                   | GSM1988101   | CEL |
| 122 | Colon-d4                   | GSM1988100   | CEL |
| 121 | Intestine-large            | GSM258676    | CEL |
| 120 | Intestine-large            | GSM258675    | CEL |
| 119 | Intestine-small            | GSM258674    | CEL |
| 118 | Intestine-small            | GSM258673    | CEL |
| 117 | Lymph-nodes                | GSM258672    | CEL |
| 116 | Spleen                     | GSM258671    | CEL |
| 115 | Spleen                     | GSM258670    | CEL |
| 114 | Neuro2a                    | GSM258669    | CEL |
| 113 | Neuro2a                    | GSM258668    | CEL |
| 112 | Astrocytes                 | GSM241898    | CEL |
| 111 | ming6                      | GSM258667    | CEL |
| 110 | ming6                      | GSM258666    | CEL |
| 109 | ming6                      | GSM258665    | CEL |
| 108 | MIMCD3                     | GSM258664    | CEL |
| 107 | MIMCD3                     | GSM258663    | CEL |
| 106 | Bruce4                     | GSM258662    | CEL |
| 105 | Bruce4                     | GSM258661    | CEL |
| 104 | C2C12                      | GSM258660    | CEL |
| 103 | C2C12                      | GSM258659    | CEL |
| 102 | NH3T3                      | GSM258739    | CEL |
| 101 | NH3T3                      | GSM258738    | CEL |
| 100 | 3T3-L1                     | GSM258610    | CEL |
| 99  | 3T3-L1                     | GSM258609    | CEL |
| 98  | 10T1/2                     | GSM258632    | CEL |
| 97  | 10T1/2                     | GSM258631    | CEL |
| 96  | Osteoblast-d21             | GSM258740    | CEL |
| 95  | Osteoblast-d21             | GSM258739    | CEL |
| 94  | Osteoblast-d14             | GSM258738    | CEL |
| 93  | Osteoblast-d14             | GSM258737    | CEL |
| 92  | Osteoblast-d5              | GSM258742    | CEL |
| 91  | Osteoblast-d5              | GSM258741    | CEL |
| 90  | Chondrocytes               | GSM266741    | CEL |
| 89  | Chondrocytes               | GSM266740    | CEL |
| 88  | Nat Helper cell            | GSM465594    | CEL |
| 87  | Nat Helper cell            | GSM465593    | CEL |
| 86  | Tt cell                    | GSM465596    | CEL |
| 85  | MS-1                       | GSM234692    | CEL |
| 84  | Lymph-endo-cells           | GSM143704    | CEL |
| 83  | PP-FDC                     | GSM481977    | CEL |
| 82  | PP-FDC                     | GSM481978    | CEL |
| 81  | PP-FDC                     | GSM481976    | CEL |
| 80  | E-LY                       | RMLNDC003001 | CEL |
| 79  | E-LY                       | RMLNDC003001 | CEL |
| 78  | Follicular-Bcells          | GSM258664    | CEL |
| 77  | Follicular-Bcells          | GSM258663    | CEL |
| 76  | MZ-Bcell                   | GSM258622    | CEL |
| 75  | MZ-Bcell                   | GSM258621    | CEL |
| 74  | BAF3                       | GSM258620    | CEL |
| 73  | BAF3                       | GSM258619    | CEL |
| 72  | Tregs                      | GSM258778    | CEL |
| 71  | T-cells-CD8+               | GSM258777    | CEL |
| 70  | T-cells-CD8+               | GSM258776    | CEL |
| 69  | T-cells-CD4+               | GSM258774    | CEL |
| 68  | T-cells-CD4+               | GSM258773    | CEL |
| 67  | T-cells-CD4+               | GSM258744    | CEL |
| 66  | Thymocyte-DN               | GSM465595    | CEL |
| 65  | Osteoclasts                | GSM258743    | CEL |
| 64  | Osteoclasts                | GSM258743    | CEL |
| 63  | Microglia                  | GSM258721    | CEL |
| 62  | Microglia                  | GSM258721    | CEL |
| 61  | PM-M-PS-7h                 | GSM258706    | CEL |
| 60  | PM-M-PS-7h                 | GSM258705    | CEL |
| 59  | PM-M-PS-6h                 | GSM258702    | CEL |
| 58  | PM-M-PS-6h                 | GSM258700    | CEL |
| 57  | PM-M-PS-6h                 | GSM258699    | CEL |
| 56  | PM-M-PS-6h                 | GSM258694    | CEL |
| 55  | PM-M-PS-6h                 | GSM258694    | CEL |
| 54  | PM-M-PS-6h                 | GSM258694    | CEL |
| 53  | PM-M-PS-6h                 | GSM258694    | CEL |
| 52  | PM-M-PS-6h                 | GSM258694    | CEL |
| 51  | PM-M-PS-6h                 | GSM258694    | CEL |
| 50  | CD8a-DC                    | GSM258647    | CEL |
| 49  | CD8a-DC                    | GSM258646    | CEL |
| 48  | CD8a+DC                    | GSM258646    | CEL |
| 47  | NK-cells                   | GSM258732    | CEL |
| 46  | NK-cells                   | GSM258731    | CEL |
| 45  | Mast-cells-IgE+Ad          | GSM258719    | CEL |
| 44  | Mast-cells-IgE+Ad          | GSM258717    | CEL |
| 43  | Mast-cells-IgE             | GSM258714    | CEL |
| 42  | Mast-cells-IgE             | GSM258713    | CEL |
| 41  | Mast-cells                 | GSM258712    | CEL |
| 40  | Granulocytes               | GSM258667    | CEL |
| 39  | Granulocytes               | GSM258667    | CEL |
| 38  | GMP                        | GSM258666    | CEL |
| 37  | GMP                        | GSM258665    | CEL |
| 36  | GMP                        | GSM258664    | CEL |
| 35  | GMP                        | GSM258642    | CEL |
| 34  | GMP                        | GSM258642    | CEL |
| 33  | MIEP                       | GSM258720    | CEL |
| 32  | MIEP                       | GSM258719    | CEL |
| 31  | HESC                       | GSM258770    | CEL |
| 30  | HESC                       | GSM258769    | CEL |
| 29  | Bone marrow                | GSM258628    | CEL |
| 28  | Bone marrow                | GSM258627    | CEL |
| 27  | paneth-cells-GE            | GSM116358    | CEL |
| 26  | paneth-cells-GE            | GSM116357    | CEL |
| 25  | paneth-cells               | GSM116360    | CEL |
| 24  | paneth-cells               | GSM116359    | CEL |
| 23  | paneth-cells               | GSM318689    | CEL |
| 22  | paneth-cells               | GSM318690    | CEL |
| 21  | Colon-Crypt                | GSM480375    | CEL |
| 20  | Colon-Crypt                | GSM480374    | CEL |
| 19  | Colon-Vill                 | GSM480363    | CEL |
| 18  | Colon-Vill                 | GSM480362    | CEL |
| 17  | Colon-IEC-Gf               | GSM349880    | CEL |
| 16  | Colon-IEC-Gf               | GSM350375    | CEL |
| 15  | Ileum-IEC                  | GSM350376    | CEL |
| 14  | Ileum-IEC                  | GSM350371    | CEL |
| 13  | Small-intestine-epithelium | RMINEP002901 | CEL |
| 12  | Small-intestine-epithelium | RMINEP001001 | CEL |
| 11  | FAE                        | RMPYEP002001 | CEL |
| 10  | FAE                        | RMPYEP001001 | CEL |
| 09  | Ileum-IEC                  | GSM190797    | CEL |
| 08  | Ileum-IEC                  | GSM190796    | CEL |
| 07  | Ileum-IEC                  | GSM190795    | CEL |
| 06  | CT-v-M-cells               | GSM190794    | CEL |
| 05  | CT-v-M-cells               | GSM190793    | CEL |
| 04  | CT-y-M-cells               | GSM190792    | CEL |
| 03  | PP-M-cells                 | GSM190791    | CEL |
| 02  | PP-M-cells                 | GSM190790    | CEL |
| 01  | PP-M-cells                 | GSM190789    | CEL |



Cluster0169\_High in NK cell, cDC, T cells and B cells (11 nodes)

374.5  
354.8  
335.1  
316.4  
295.7  
276  
256.3  
236.5  
216.8  
197.1  
177.4  
157.7  
138  
118.3  
98.6  
78.8  
59.1  
39.4  
19.7  
0

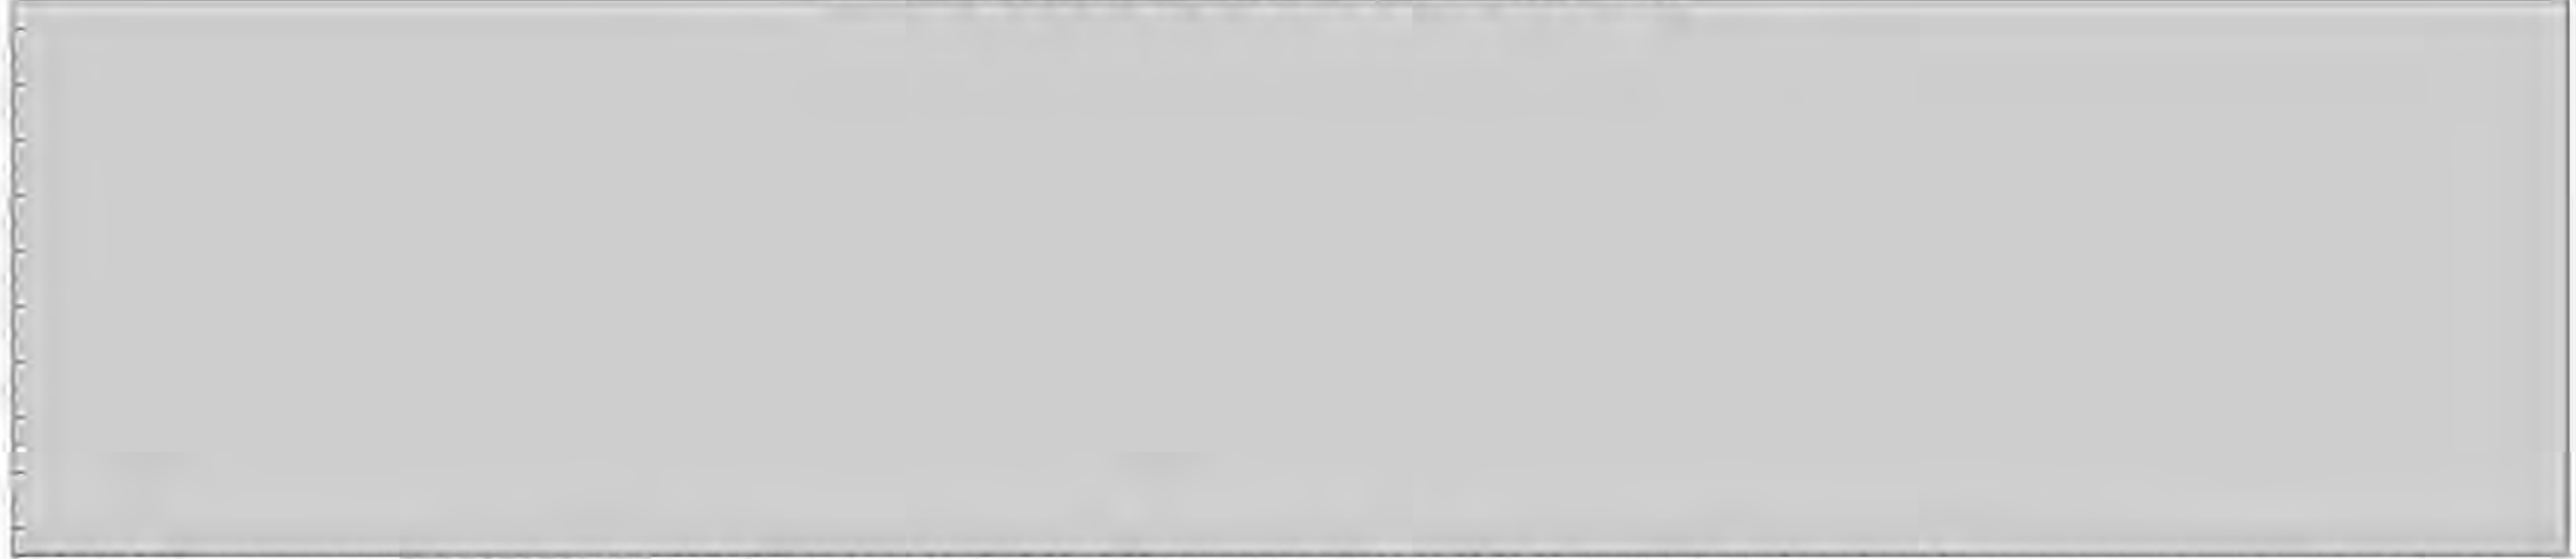

|     |                            |              |      |
|-----|----------------------------|--------------|------|
| 30  | NALT                       | GSM289411    | CELL |
| 129 | NALT                       | GSM289410    | CELL |
| 128 | NALT                       | GSM289409    | CELL |
| 127 | NALT                       | GSM289408    | CELL |
| 126 | Colon-d9                   | GSM198810    | CELL |
| 125 | Colon-d9                   | GSM198810    | CELL |
| 124 | Colon-d4                   | GSM198810    | CELL |
| 123 | Colon-d4                   | GSM198810    | CELL |
| 122 | Colon-d4                   | GSM198810    | CELL |
| 121 | Intestine-large            | GSM258676    | CELL |
| 120 | Intestine-large            | GSM258675    | CELL |
| 119 | Intestine-small            | GSM258678    | CELL |
| 118 | Intestine-small            | GSM258692    | CELL |
| 117 | Lymph-nodes                | GSM258691    | CELL |
| 116 | Spleen                     | GSM258676    | CELL |
| 115 | Spleen                     | GSM258677    | CELL |
| 114 | Neuro2a                    | GSM258728    | CELL |
| 113 | Neuro2a                    | GSM258729    | CELL |
| 112 | Astrocytes                 | GSM241898    | CELL |
| 111 | ming                       | GSM258726    | CELL |
| 110 | ming                       | GSM258725    | CELL |
| 109 | ming                       | GSM258724    | CELL |
| 108 | MIMCD3                     | GSM258723    | CELL |
| 107 | MIMCD3                     | GSM258723    | CELL |
| 106 | Bruce4                     | GSM258690    | CELL |
| 105 | Bruce4                     | GSM258690    | CELL |
| 104 | C2C12                      | GSM258690    | CELL |
| 103 | C2C12                      | GSM258690    | CELL |
| 102 | NH3T3                      | GSM258730    | CELL |
| 101 | NH3T3                      | GSM258729    | CELL |
| 100 | 3T3-L1                     | GSM258610    | CELL |
| 99  | 3T3-L1                     | GSM258609    | CELL |
| 98  | 10T12                      | GSM258692    | CELL |
| 97  | 10T12                      | GSM258692    | CELL |
| 96  | Osteoblast-d21             | GSM258740    | CELL |
| 95  | Osteoblast-d14             | GSM258738    | CELL |
| 94  | Osteoblast-d14             | GSM258737    | CELL |
| 93  | Osteoblast-d5              | GSM258742    | CELL |
| 92  | Osteoblast-d5              | GSM258741    | CELL |
| 91  | Chondrocytes               | GSM258674    | CELL |
| 90  | Chondrocytes               | GSM258674    | CELL |
| 89  | Nat Helper cell            | GSM465594    | CELL |
| 88  | Nat Helper cell            | GSM465593    | CELL |
| 87  | T cell                     | GSM465596    | CELL |
| 86  | MS-1                       | GSM234692    | CELL |
| 85  | Lymph-endc-cells           | GSM143704    | CELL |
| 84  | PP-FDC                     | GSM481977    | CELL |
| 83  | PP-FDC                     | GSM481978    | CELL |
| 82  | PP-FDC                     | GSM481976    | CELL |
| 81  | PP-FDC                     | GSM481976    | CELL |
| 80  | E-LY                       | RMLNDC002001 | CELL |
| 79  | E-LY                       | RMLNDC002001 | CELL |
| 78  | Follicular-Bcells          | GSM258664    | CELL |
| 77  | Follicular-Bcells          | GSM258663    | CELL |
| 76  | MZ-Bcell                   | GSM258622    | CELL |
| 75  | MZ-Bcell                   | GSM258621    | CELL |
| 74  | BAF3                       | GSM258620    | CELL |
| 73  | BAF3                       | GSM258619    | CELL |
| 72  | Tregs                      | GSM258778    | CELL |
| 71  | T-cells-CD8+               | GSM258777    | CELL |
| 70  | T-cells-CD8+               | GSM258776    | CELL |
| 69  | T-cells-CD4+               | GSM258774    | CELL |
| 68  | T-cells-CD4+               | GSM258773    | CELL |
| 67  | T-cells-CD4+               | GSM258744    | CELL |
| 66  | Thymocyte-DN               | GSM465595    | CELL |
| 65  | Osteoclasts                | GSM258743    | CELL |
| 64  | Microglia                  | GSM258721    | CELL |
| 63  | Microglia                  | GSM258721    | CELL |
| 62  | MM-LPS-7h                  | GSM258706    | CELL |
| 61  | MM-LPS-7h                  | GSM258705    | CELL |
| 60  | MM-LPS-6h                  | GSM258702    | CELL |
| 59  | MM-LPS-6h                  | GSM258700    | CELL |
| 58  | MM-LPS-6h                  | GSM258699    | CELL |
| 57  | MM-LPS-6h                  | GSM258699    | CELL |
| 56  | MM-LPS-6h                  | GSM258694    | CELL |
| 55  | MM-LPS-6h                  | GSM258694    | CELL |
| 54  | MM-LPS-6h                  | GSM258694    | CELL |
| 53  | MM-LPS-6h                  | GSM258694    | CELL |
| 52  | MM-LPS-6h                  | GSM258694    | CELL |
| 51  | MM-LPS-6h                  | GSM258694    | CELL |
| 50  | CD8a-DC                    | GSM258647    | CELL |
| 49  | CD8a-DC                    | GSM258647    | CELL |
| 48  | CD8a+DC                    | GSM258646    | CELL |
| 47  | NK-cells                   | GSM258732    | CELL |
| 46  | NK-cells                   | GSM258731    | CELL |
| 45  | Mast-cells-IgE+Ad          | GSM258718    | CELL |
| 44  | Mast-cells-IgE+Ad          | GSM258717    | CELL |
| 43  | Mast-cells-IgE             | GSM258714    | CELL |
| 42  | Mast-cells-IgE             | GSM258713    | CELL |
| 41  | Mast-cells                 | GSM258712    | CELL |
| 40  | Granulocytes               | GSM258668    | CELL |
| 39  | Granulocytes               | GSM258667    | CELL |
| 38  | GMP                        | GSM258666    | CELL |
| 37  | GMP                        | GSM258665    | CELL |
| 36  | GMP                        | GSM258664    | CELL |
| 35  | GMP                        | GSM258664    | CELL |
| 34  | GMP                        | GSM258664    | CELL |
| 33  | MIEP                       | GSM258720    | CELL |
| 32  | MIEP                       | GSM258719    | CELL |
| 31  | HS-C                       | GSM258770    | CELL |
| 30  | HS-C                       | GSM258769    | CELL |
| 29  | Bone marrow                | GSM258628    | CELL |
| 28  | bone marrow                | GSM258627    | CELL |
| 27  | paneth-cells-GF            | GSM116358    | CELL |
| 26  | paneth-cells-GF            | GSM116357    | CELL |
| 25  | paneth-cells               | GSM116350    | CELL |
| 24  | paneth-cells               | GSM116359    | CELL |
| 23  | paneth-cells               | GSM318589    | CELL |
| 22  | paneth-cells               | GSM318590    | CELL |
| 21  | Colon-Crypt                | GSM480375    | CELL |
| 20  | Colon-Crypt                | GSM480374    | CELL |
| 19  | Colon-Vill                 | GSM480363    | CELL |
| 18  | Colon-Vill                 | GSM480362    | CELL |
| 17  | Colon-IEC-Gf               | GSM349880    | CELL |
| 16  | Colon-IEC-Gf               | GSM350375    | CELL |
| 15  | Ileum-IEC                  | GSM350376    | CELL |
| 14  | Ileum-IEC                  | GSM350371    | CELL |
| 13  | Small-intestine-epithelium | RMINEP002001 | CELL |
| 12  | Small-intestine-epithelium | RMINEP001001 | CELL |
| 11  | FAE                        | RMPYEP001001 | CELL |
| 10  | FAE                        | RMPYEP001001 | CELL |
| 09  | Ileum-IEC                  | GSM190797    | CELL |
| 08  | Ileum-IEC                  | GSM190796    | CELL |
| 07  | Ileum-IEC                  | GSM190795    | CELL |
| 06  | CT-w-M-cells               | GSM190794    | CELL |
| 05  | CT-w-M-cells               | GSM190793    | CELL |
| 04  | CT-y-M-cells               | GSM190792    | CELL |
| 03  | PP-M-cells                 | GSM190791    | CELL |
| 02  | PP-M-cells                 | GSM190790    | CELL |
| 01  | PP-M-cells                 | GSM190789    | CELL |







Cluster0171\_High in 10T12 and 3T3L1 cells (11 nodes)

1,609.6  
1,524.8  
1,440.1  
1,355.4  
1,270.7  
1,186  
1,101.2  
1,016.5  
931.8  
847.1  
762.4  
677.7  
593  
508.3  
423.6  
338.8  
254.1  
169.4  
84.7  
0

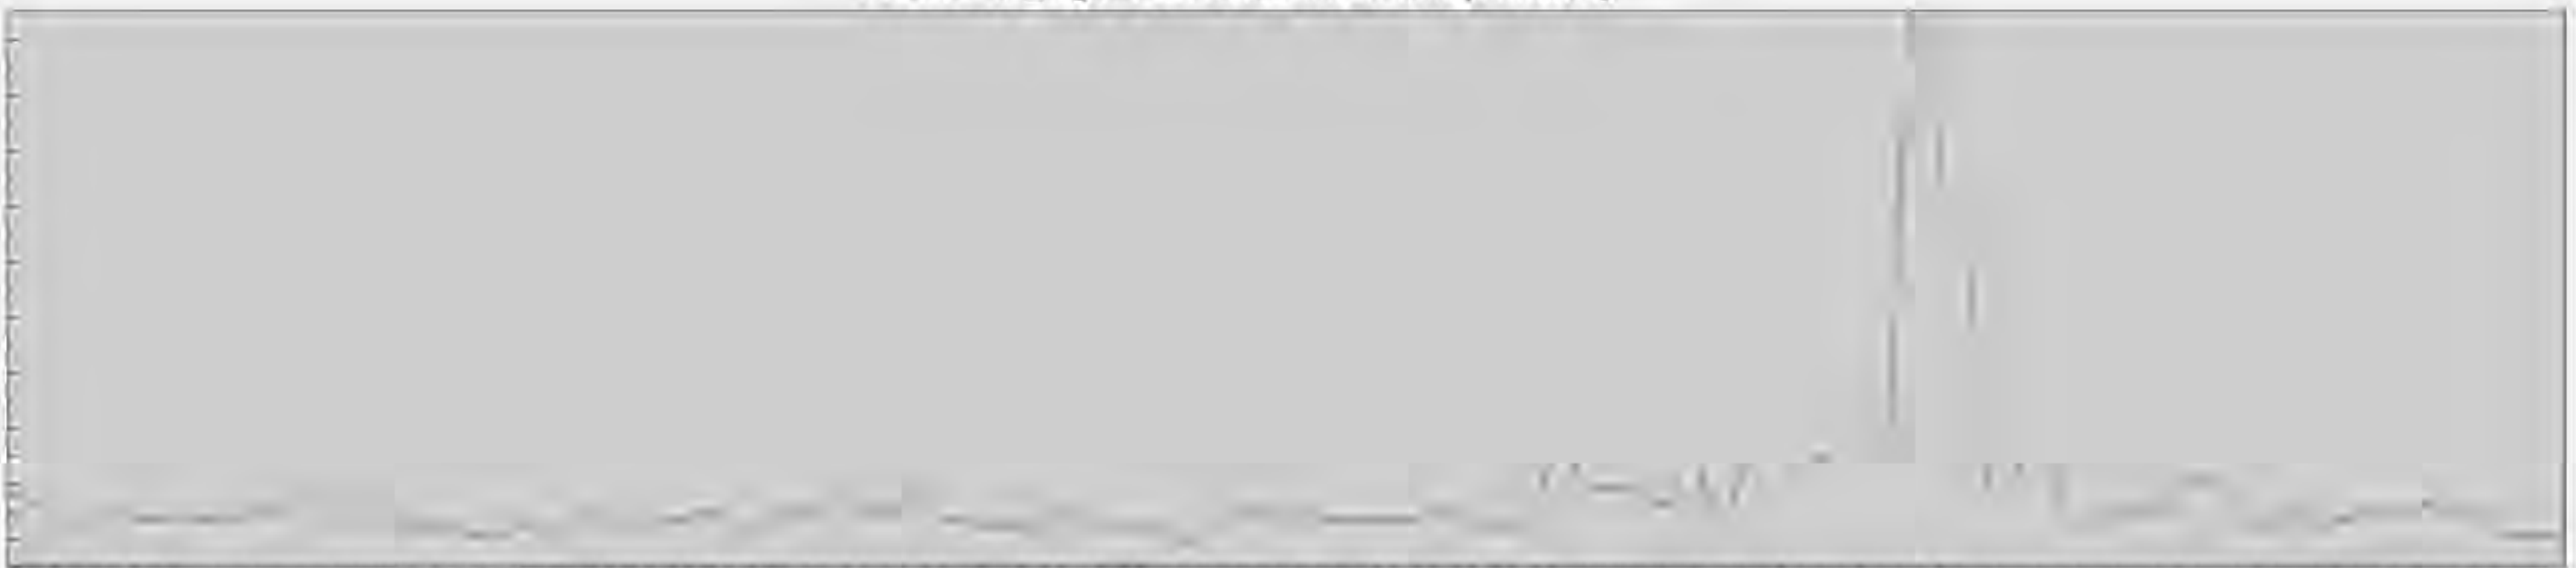

130-NAL1 GSM289411 CEL  
129-NAL1 GSM289410 CEL  
128-NAL1 GSM289409 CEL  
127-NAL1 GSM289408 CEL  
126-Color-d9 GSM1988105 CEL  
125-Color-d9 GSM1988103 CEL  
124-Color-d9 GSM1988102 CEL  
123-Color-d4 GSM1988101 CEL  
122-Color-d4 GSM1988101 CEL  
121-Intestine-large GSM258676 CEL  
120-Intestine-large GSM258675 CEL  
119-Intestine-small GSM258678 CEL  
118-Intestine-small GSM258692 CEL  
117-Lymph-nodes GSM258691 CEL  
116-Lymph-nodes GSM258726 CEL  
115-Spleen GSM258767 CEL  
114-Spleen GSM258767 CEL  
113-Neuro2a GSM258728 CEL  
112-Neuro2a GSM258727 CEL  
111-Astrocytes GSM241898 CEL  
110-mim6 GSM258726 CEL  
109-mim6 GSM258725 CEL  
108-MIMCD3 GSM258724 CEL  
107-MIMCD3 GSM258723 CEL  
106-Bruce4 GSM258656 CEL  
105-Bruce4 GSM258656 CEL  
104-C2C12 GSM258690 CEL  
103-C2C12 GSM258629 CEL  
102-NH3T3 GSM258739 CEL  
101-NH3T3 GSM258739 CEL  
100-3T3-L1 GSM258610 CEL  
99-3T3-L1 GSM258609 CEL  
98-10T12 GSM258632 CEL  
97-10T12 GSM258631 CEL  
96-Osteoblast-d21 GSM258740 CEL  
95-Osteoblast-d21 GSM258739 CEL  
94-Osteoblast-d14 GSM258738 CEL  
93-Osteoblast-d14 GSM258737 CEL  
92-Osteoblast-d5 GSM258742 CEL  
91-Osteoblast-d5 GSM258741 CEL  
90-Chondrocytes GSM266741 CEL  
89-Chondrocytes GSM266740 CEL  
88-Nat Helper cell GSM465594 CEL  
87-Nat Helper cell GSM465593 CEL  
86-LT cell GSM465596 CEL  
85-MS-1 GSM234692 CEL  
84-Lymph-endo-cells GSM143704 CEL  
83-P-FDC GSM481977 CEL  
82-P-FDC GSM481978 CEL  
81-P-FDC GSM481976 CEL  
80-L-Y RMLNDCC003001 CEL  
79-L-Y RMLNDCC003001 CEL  
78-Follicular-Bcells GSM258664 CEL  
77-Follicular-Bcells GSM258663 CEL  
76-MZ-Bcell GSM258622 CEL  
75-MZ-Bcell GSM258621 CEL  
74-BAF3 GSM258620 CEL  
73-BAF3 GSM258619 CEL  
72-Tregs GSM258778 CEL  
71-Tregs GSM258777 CEL  
70-T-cells-CD8+ GSM258776 CEL  
69-T-cells-CD8+ GSM258774 CEL  
68-T-cells-CD4+ GSM258773 CEL  
67-T-cells-CD4+ GSM258773 CEL  
66-Thymocyte-DN GSM465595 CEL  
65-Osteoclasts GSM258743 CEL  
64-Osteoclasts GSM258743 CEL  
63-Microglia GSM258721 CEL  
62-Microglia GSM258721 CEL  
61-MM-LPS-7h GSM258706 CEL  
60-MM-LPS-7h GSM258706 CEL  
59-MM-LPS-6h GSM258702 CEL  
58-MM-LPS-6h GSM258702 CEL  
57-MM-LPS-6h GSM258699 CEL  
56-MM-LPS-6h GSM258699 CEL  
55-MM-LPS-6h GSM258694 CEL  
54-MM-LPS-6h GSM258694 CEL  
53-Plasmacytoid-DC GSM258650 CEL  
52-Plasmacytoid-DC GSM258649 CEL  
51-CD8a-DC GSM258648 CEL  
50-CD8a-DC GSM258647 CEL  
49-CD8a+DC GSM258646 CEL  
48-CD8a+DC GSM258646 CEL  
47-NK-cells GSM258732 CEL  
46-NK-cells GSM258731 CEL  
45-Mast-cells-IgE+Ad GSM258719 CEL  
44-Mast-cells-IgE+Ad GSM258717 CEL  
43-Mast-cells-IgE GSM258714 CEL  
42-Mast-cells-IgE GSM258713 CEL  
41-Mast-cells GSM258712 CEL  
40-Granulocytes GSM258668 CEL  
39-Granulocytes GSM258667 CEL  
38-GMP GSM258666 CEL  
37-GMP GSM258666 CEL  
36-GMP GSM258665 CEL  
35-GMP GSM258664 CEL  
34-MPEP GSM258642 CEL  
33-MPEP GSM258642 CEL  
32-MPEP GSM258720 CEL  
31-HESC GSM258770 CEL  
30-HESC GSM258770 CEL  
29-Bone marrow GSM258628 CEL  
28-Bone marrow GSM258627 CEL  
27-paneth-cells-GE GSM116358 CEL  
26-paneth-cells-GE GSM116357 CEL  
25-paneth-cells GSM116350 CEL  
24-paneth-cells GSM116359 CEL  
23-paneth-cells GSM318589 CEL  
22-paneth-cells GSM318590 CEL  
21-paneth-cells GSM318590 CEL  
20-Color-Crypt GSM480375 cel  
19-Color-Vill GSM480363 cel  
18-Color-Vill GSM480362 cel  
17-Color-IEC-GE GSM349880 CEL  
16-Color-IEC-GE GSM350375 CEL  
15-Intestine-epithelium RMINEP002901 CEL  
14-Intestine-epithelium RMINEP001001 CEL  
13-Intestine-epithelium RMINEP002901 CEL  
12-Intestine-epithelium RMINEP001001 CEL  
11-FAE-RMPYEP002001 CEL  
10-FAE-RMPYEP001001 CEL  
09-Intestine-epithelium RMINEP002901 CEL  
08-Intestine-epithelium RMINEP001001 CEL  
07-Intestine-epithelium RMINEP002901 CEL  
06-Intestine-epithelium RMINEP001001 CEL  
05-Intestine-epithelium RMINEP002901 CEL  
04-Intestine-epithelium RMINEP001001 CEL  
03-Intestine-epithelium RMINEP002901 CEL  
02-Intestine-epithelium RMINEP001001 CEL  
01-Intestine-epithelium RMINEP002901 CEL







Cluster0173\_High in endothelial cells (11 nodes)

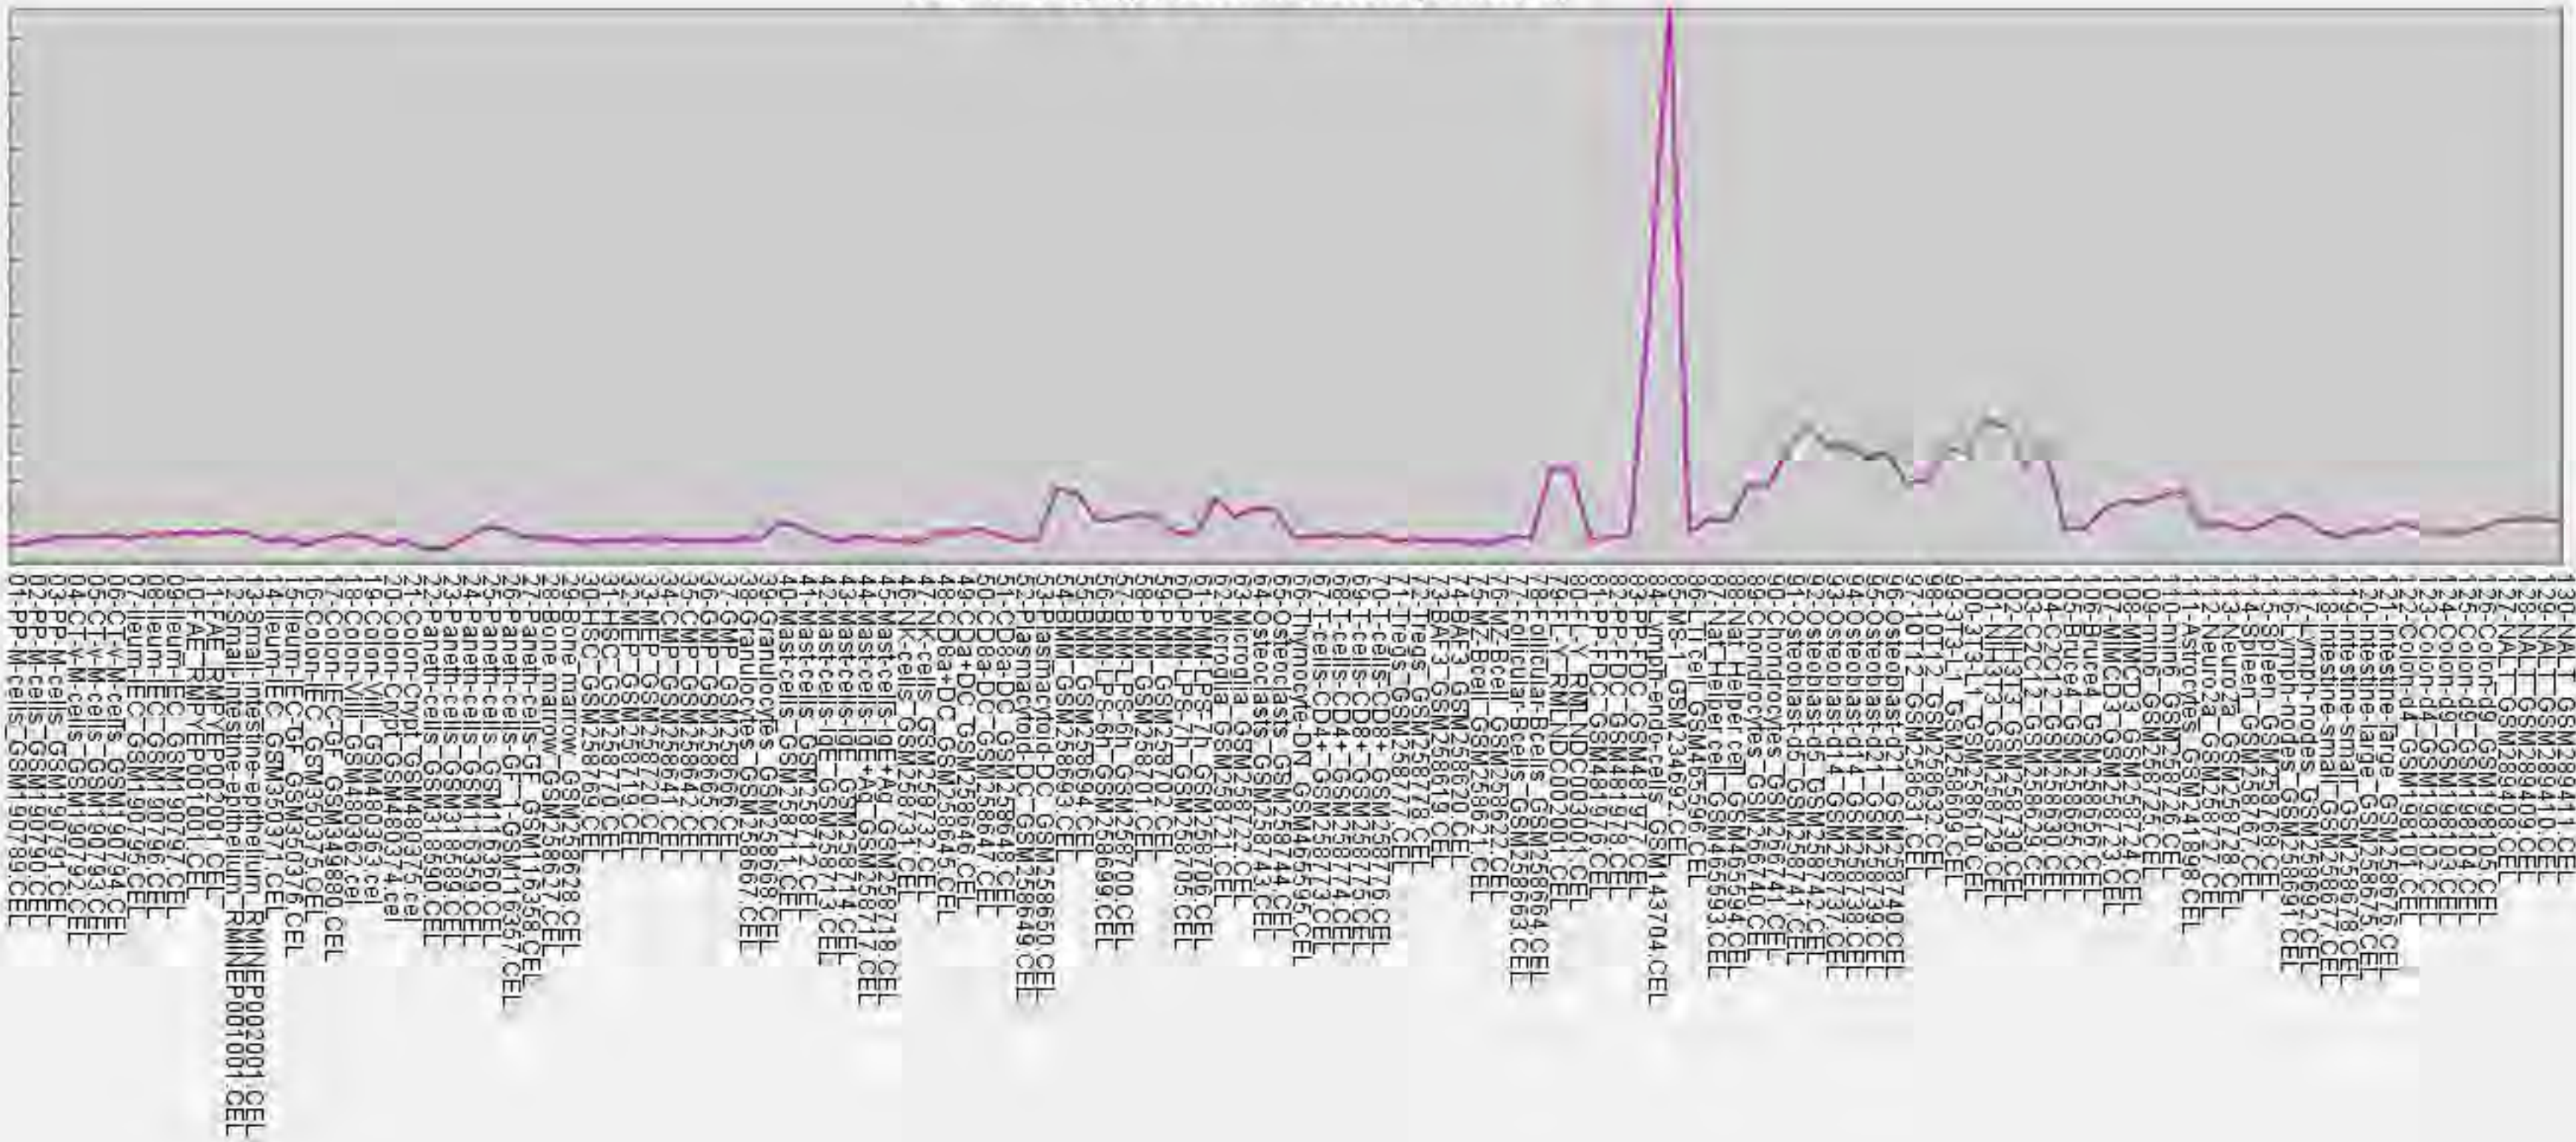



Cluster0174\_Uncertain-low in many (11 nodes)

93.3  
88.4  
83.5  
78.6  
73.7  
68.7  
63.8  
58.9  
54  
49.1  
44.2  
39.3  
34.4  
29.5  
24.6  
19.6  
14.7  
9.8  
4.9  
0

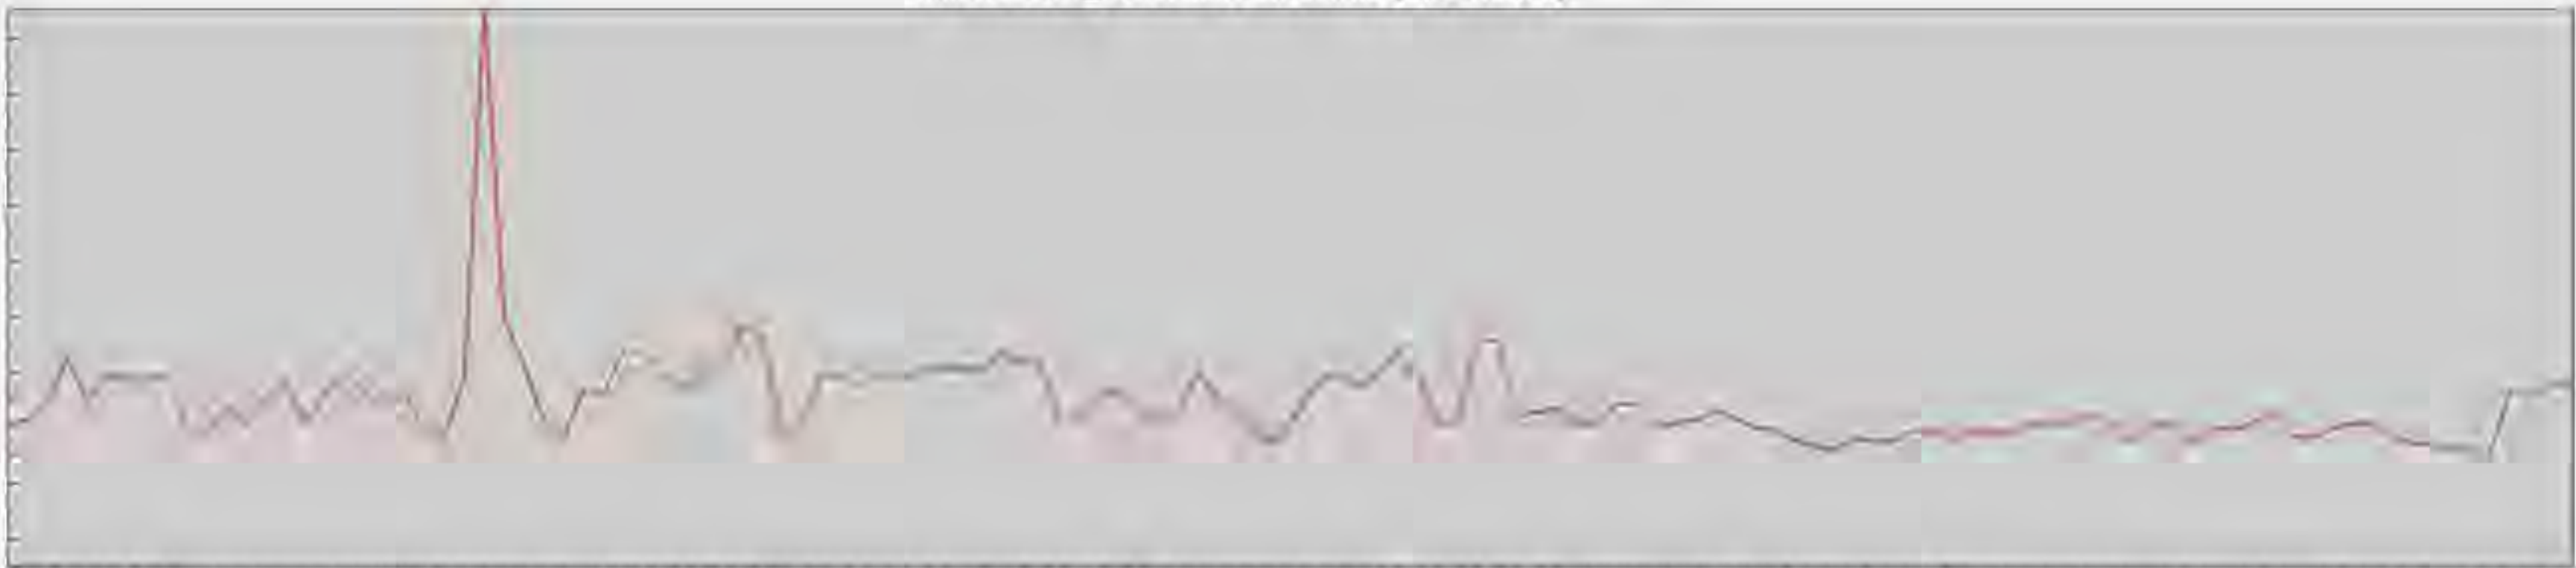

130-NALT GSM289411.CEL  
129-NALT GSM289410.CEL  
128-NALT GSM289409.CEL  
127-NALT GSM289408.CEL  
126-Colon-d9 GSM1988105.CEL  
125-Colon-d9 GSM1988104.CEL  
124-Colon-d9 GSM1988103.CEL  
123-Colon-d4 GSM1988102.CEL  
122-Colon-d4 GSM1988101.CEL  
121-Intestine-large GSM258676.CEL  
120-Intestine-large GSM258675.CEL  
119-Intestine-small GSM258678.CEL  
118-Intestine-small GSM258679.CEL  
117-Lymph-nodes GSM258691.CEL  
116-Lymph-nodes GSM258692.CEL  
115-Spleen GSM258767.CEL  
114-Spleen GSM258768.CEL  
113-Neuro2a GSM258728.CEL  
112-Neuro2a GSM258727.CEL  
111-Astrocytes GSM241898.CEL  
110-mim6 GSM258726.CEL  
109-mim6 GSM258725.CEL  
108-MIMCD3 GSM258724.CEL  
107-MIMCD3 GSM258723.CEL  
106-Bruce4 GSM258656.CEL  
105-Bruce4 GSM258655.CEL  
104-C2C12 GSM258690.CEL  
103-C2C12 GSM258689.CEL  
102-NH3T3 GSM258739.CEL  
101-NH3T3 GSM258738.CEL  
100-3T3-L1 GSM258610.CEL  
99-3T3-L1 GSM258609.CEL  
98-10T12 GSM258632.CEL  
97-10T12 GSM258631.CEL  
96-Osteoblast-d21 GSM258740.CEL  
95-Osteoblast-d21 GSM258739.CEL  
94-Osteoblast-d14 GSM258738.CEL  
93-Osteoblast-d14 GSM258737.CEL  
92-Osteoblast-d5 GSM258742.CEL  
91-Osteoblast-d5 GSM258741.CEL  
90-Chondrocytes GSM266741.CEL  
89-Chondrocytes GSM266740.CEL  
88-Nat Helper cell GSM465594.CEL  
87-Nat Helper cell GSM465593.CEL  
86-TT cell GSM465596.CEL  
85-MS-1 GSM234692.CEL  
84-Lymph-endo-cells GSM143704.CEL  
83-PP-FDC GSM481977.CEL  
82-PP-FDC GSM481978.CEL  
81-PP-FDC GSM481976.CEL  
80-LY-RMLNDCC003001.CEL  
79-LY-RMLNDCC003001.CEL  
78-Follicular-Bcells GSM258664.CEL  
77-Follicular-Bcells GSM258663.CEL  
76-MZ-Bcell GSM258627.CEL  
75-MZ-Bcell GSM258621.CEL  
74-BAF3 GSM258620.CEL  
73-BAF3 GSM258619.CEL  
72-Tregs GSM258778.CEL  
71-Tregs GSM258777.CEL  
70-T-cells-CD8+ GSM258776.CEL  
69-T-cells-CD8+ GSM258774.CEL  
68-T-cells-CD4+ GSM258773.CEL  
67-T-cells-CD4+ GSM258773.CEL  
66-Thymocyte-DN GSM465595.CEL  
65-Osteoclasts GSM258743.CEL  
64-Microglia GSM258721.CEL  
63-Microglia GSM258721.CEL  
62-MM-LPS-7h GSM268706.CEL  
61-MM-LPS-7h GSM268706.CEL  
60-MM-LPS-7h GSM268705.CEL  
59-MM-LPS-6h GSM258702.CEL  
58-MM-LPS-6h GSM258701.CEL  
57-MM-LPS-6h GSM258699.CEL  
56-MM-LPS-6h GSM258699.CEL  
55-MM-LPS-6h GSM258694.CEL  
54-Plasmacytoid-DC GSM258650.CEL  
53-Plasmacytoid-DC GSM258649.CEL  
52-CD8a-DC GSM258647.CEL  
51-CD8a-DC GSM258647.CEL  
50-CD8a+DC GSM258646.CEL  
49-CD8a+DC GSM258646.CEL  
48-NK-cells GSM258737.CEL  
47-NK-cells GSM258737.CEL  
46-Mast-cells-IgE+Ad GSM258718.CEL  
45-Mast-cells-IgE+Ad GSM258717.CEL  
44-Mast-cells-IgE GSM258714.CEL  
43-Mast-cells-IgE GSM258713.CEL  
42-Mast-cells-IgE GSM258712.CEL  
41-Mast-cells GSM258711.CEL  
40-Granulocytes GSM258668.CEL  
39-Granulocytes GSM258667.CEL  
38-GMP GSM258666.CEL  
37-GMP GSM258666.CEL  
36-GMP GSM258665.CEL  
35-CMP GSM258642.CEL  
34-CMP GSM258642.CEL  
33-MEP GSM258720.CEL  
32-MEP GSM258719.CEL  
31-HSC GSM258770.CEL  
30-HSC GSM258770.CEL  
29-Bone marrow GSM258628.CEL  
28-Bone marrow GSM258627.CEL  
27-Paneth-cells-GE GSM116357.CEL  
26-Paneth-cells-GE GSM116350.CEL  
25-Paneth-cells GSM116350.CEL  
24-Paneth-cells GSM116359.CEL  
23-Paneth-cells GSM318589.CEL  
22-Paneth-cells GSM318590.CEL  
21-Colon-Crypt GSM480375.CEL  
20-Colon-Crypt GSM480374.CEL  
19-Colon-Vill GSM480363.CEL  
18-Colon-Vill GSM480362.CEL  
17-Colon-IEC-Gf GSM349880.CEL  
16-Colon-IEC-Gf GSM350375.CEL  
15-Ileum-IEC-Gf GSM350376.CEL  
14-Ileum-IEC GSM350371.CEL  
13-Small-intestine-epithelium RMINEP002001.CEL  
12-Small-intestine-epithelium RMINEP001001.CEL  
11-FAE-RMPYEP002001.CEL  
10-FAE-RMPYEP001001.CEL  
09-Ileum-IEC GSM190797.CEL  
08-Ileum-IEC GSM190796.CEL  
07-Ileum-IEC GSM190795.CEL  
06-CT-v-M-cells GSM190794.CEL  
05-CT-v-M-cells GSM190793.CEL  
04-PP-M-cells GSM190792.CEL  
03-PP-M-cells GSM190791.CEL  
02-PP-M-cells GSM190790.CEL  
01-PP-M-cells GSM190789.CEL



Cluster0175\_Mast cells and phagocyte-related (11 nodes)

3,781.8  
3,582.8  
3,383.7  
3,184.7  
2,985.6  
2,786.6  
2,587.6  
2,388.5  
2,189.5  
1,990.4  
1,791.4  
1,592.3  
1,393.3  
1,194.3  
995.2  
796.2  
597.1  
398.1  
199  
0

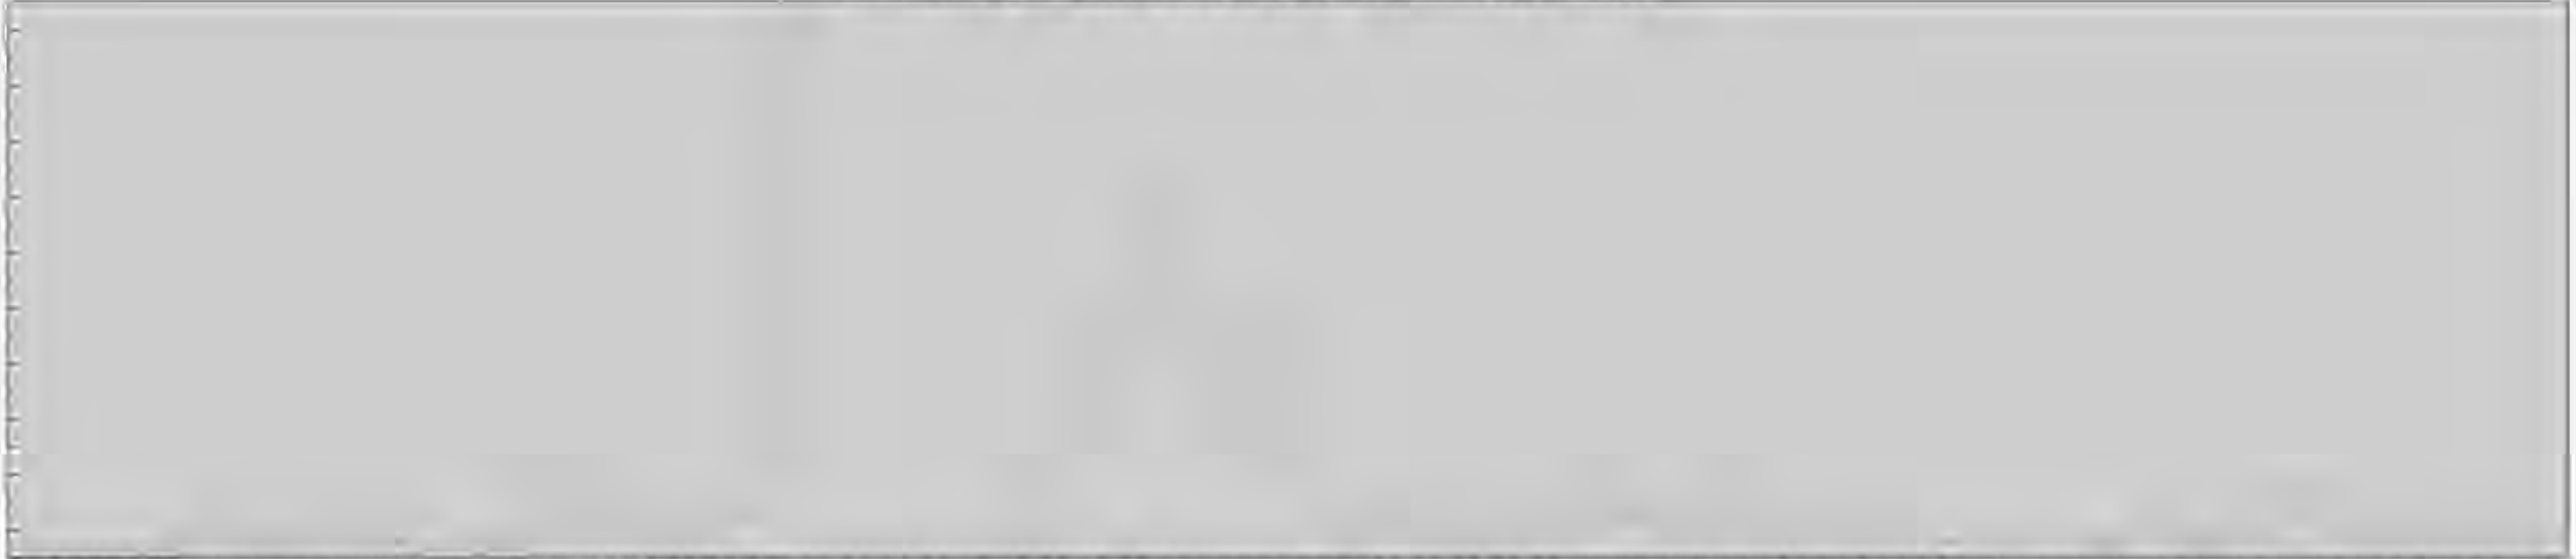

|     |                   |              |      |
|-----|-------------------|--------------|------|
| 30  | NALT              | GSM289411    | CELL |
| 129 | NALT              | GSM289410    | CELL |
| 128 | NALT              | GSM289409    | CELL |
| 127 | NALT              | GSM289408    | CELL |
| 126 | Colon-d9          | GSM1988104   | CELL |
| 125 | Colon-d9          | GSM1988103   | CELL |
| 124 | Colon-d9          | GSM1988102   | CELL |
| 123 | Colon-d4          | GSM1988101   | CELL |
| 122 | Colon-d4          | GSM1988100   | CELL |
| 121 | Intestine-large   | GSM258676    | CELL |
| 120 | Intestine-large   | GSM258675    | CELL |
| 119 | Intestine-small   | GSM258674    | CELL |
| 118 | Intestine-small   | GSM258673    | CELL |
| 117 | Lymph-nodes       | GSM258672    | CELL |
| 116 | Spleen            | GSM258671    | CELL |
| 115 | Spleen            | GSM258670    | CELL |
| 114 | Neuro2a           | GSM258669    | CELL |
| 113 | Neuro2a           | GSM258668    | CELL |
| 112 | Astrocytes        | GSM241898    | CELL |
| 111 | ming              | GSM258667    | CELL |
| 110 | ming              | GSM258666    | CELL |
| 109 | ming              | GSM258665    | CELL |
| 108 | MIMCD3            | GSM258664    | CELL |
| 107 | MIMCD3            | GSM258663    | CELL |
| 106 | Bruce4            | GSM258662    | CELL |
| 105 | Bruce4            | GSM258661    | CELL |
| 104 | C2C12             | GSM258660    | CELL |
| 103 | C2C12             | GSM258659    | CELL |
| 102 | NH3T3             | GSM258658    | CELL |
| 101 | NH3T3             | GSM258657    | CELL |
| 100 | 3T3-L1            | GSM258656    | CELL |
| 99  | 3T3-L1            | GSM258655    | CELL |
| 98  | 10T12             | GSM258654    | CELL |
| 97  | 10T12             | GSM258653    | CELL |
| 96  | Osteoblast-d21    | GSM258652    | CELL |
| 95  | Osteoblast-d14    | GSM258651    | CELL |
| 94  | Osteoblast-d14    | GSM258650    | CELL |
| 93  | Osteoblast-d5     | GSM258649    | CELL |
| 92  | Osteoblast-d5     | GSM258648    | CELL |
| 91  | Chondrocytes      | GSM266741    | CELL |
| 90  | Chondrocytes      | GSM266740    | CELL |
| 89  | Nat Helper cell   | GSM465594    | CELL |
| 88  | Nat Helper cell   | GSM465593    | CELL |
| 87  | LT cell           | GSM465592    | CELL |
| 86  | MS-1              | GSM234692    | CELL |
| 85  | Lymph-endo-cells  | GSM143704    | CELL |
| 84  | PP-FDC            | GSM481977    | CELL |
| 83  | PP-FDC            | GSM481978    | CELL |
| 82  | PP-FDC            | GSM481979    | CELL |
| 81  | PP-FDC            | GSM481976    | CELL |
| 80  | E-LY              | RMLNDC003001 | CELL |
| 79  | E-LY              | RMLNDC003001 | CELL |
| 78  | Follicular-Bcells | GSM258664    | CELL |
| 77  | Follicular-Bcells | GSM258663    | CELL |
| 76  | MZ-Bcell          | GSM258662    | CELL |
| 75  | MZ-Bcell          | GSM258661    | CELL |
| 74  | BAF3              | GSM258660    | CELL |
| 73  | BAF3              | GSM258659    | CELL |
| 72  | Tregs             | GSM258658    | CELL |
| 71  | T-cells-CD8+      | GSM258657    | CELL |
| 70  | T-cells-CD8+      | GSM258656    | CELL |
| 69  | T-cells-CD4+      | GSM258655    | CELL |
| 68  | T-cells-CD4+      | GSM258654    | CELL |
| 67  | Thymocyte-DN      | GSM465595    | CELL |
| 66  | Osteoclasts       | GSM258674    | CELL |
| 65  | Microglia         | GSM258673    | CELL |
| 64  | Microglia         | GSM258672    | CELL |
| 63  | Microglia         | GSM258671    | CELL |
| 62  | Microglia         | GSM258670    | CELL |
| 61  | PS-7h             | GSM258669    | CELL |
| 60  | PS-7h             | GSM258668    | CELL |
| 59  | PS-6h             | GSM258667    | CELL |
| 58  | PS-6h             | GSM258666    | CELL |
| 57  | PS-6h             | GSM258665    | CELL |
| 56  | PS-6h             | GSM258664    | CELL |
| 55  | PS-6h             | GSM258663    | CELL |
| 54  | PS-6h             | GSM258662    | CELL |
| 53  | PS-6h             | GSM258661    | CELL |
| 52  | PS-6h             | GSM258660    | CELL |
| 51  | PS-6h             | GSM258659    | CELL |
| 50  | PS-6h             | GSM258658    | CELL |
| 49  | PS-6h             | GSM258657    | CELL |
| 48  | PS-6h             | GSM258656    | CELL |
| 47  | PS-6h             | GSM258655    | CELL |
| 46  | PS-6h             | GSM258654    | CELL |
| 45  | PS-6h             | GSM258653    | CELL |
| 44  | PS-6h             | GSM258652    | CELL |
| 43  | PS-6h             | GSM258651    | CELL |
| 42  | PS-6h             | GSM258650    | CELL |
| 41  | PS-6h             | GSM258649    | CELL |
| 40  | PS-6h             | GSM258648    | CELL |
| 39  | PS-6h             | GSM258647    | CELL |
| 38  | PS-6h             | GSM258646    | CELL |
| 37  | PS-6h             | GSM258645    | CELL |
| 36  | PS-6h             | GSM258644    | CELL |
| 35  | PS-6h             | GSM258643    | CELL |
| 34  | PS-6h             | GSM258642    | CELL |
| 33  | PS-6h             | GSM258641    | CELL |
| 32  | PS-6h             | GSM258640    | CELL |
| 31  | PS-6h             | GSM258639    | CELL |
| 30  | PS-6h             | GSM258638    | CELL |
| 29  | PS-6h             | GSM258637    | CELL |
| 28  | PS-6h             | GSM258636    | CELL |
| 27  | PS-6h             | GSM258635    | CELL |
| 26  | PS-6h             | GSM258634    | CELL |
| 25  | PS-6h             | GSM258633    | CELL |
| 24  | PS-6h             | GSM258632    | CELL |
| 23  | PS-6h             | GSM258631    | CELL |
| 22  | PS-6h             | GSM258630    | CELL |
| 21  | PS-6h             | GSM258629    | CELL |
| 20  | PS-6h             | GSM258628    | CELL |
| 19  | PS-6h             | GSM258627    | CELL |
| 18  | PS-6h             | GSM258626    | CELL |
| 17  | PS-6h             | GSM258625    | CELL |
| 16  | PS-6h             | GSM258624    | CELL |
| 15  | PS-6h             | GSM258623    | CELL |
| 14  | PS-6h             | GSM258622    | CELL |
| 13  | PS-6h             | GSM258621    | CELL |
| 12  | PS-6h             | GSM258620    | CELL |
| 11  | PS-6h             | GSM258619    | CELL |
| 10  | PS-6h             | GSM258618    | CELL |
| 9   | PS-6h             | GSM258617    | CELL |
| 8   | PS-6h             | GSM258616    | CELL |
| 7   | PS-6h             | GSM258615    | CELL |
| 6   | PS-6h             | GSM258614    | CELL |
| 5   | PS-6h             | GSM258613    | CELL |
| 4   | PS-6h             | GSM258612    | CELL |
| 3   | PS-6h             | GSM258611    | CELL |
| 2   | PS-6h             | GSM258610    | CELL |
| 1   | PS-6h             | GSM258609    | CELL |



Cluster0176\_Uncertain-low in many (11 nodes)

150.6  
142.7  
134.7  
126.8  
118.9  
111  
103  
95.1  
87.2  
79.3  
71.3  
63.4  
55.5  
47.6  
39.6  
31.7  
23.8  
15.9  
7.9  
0

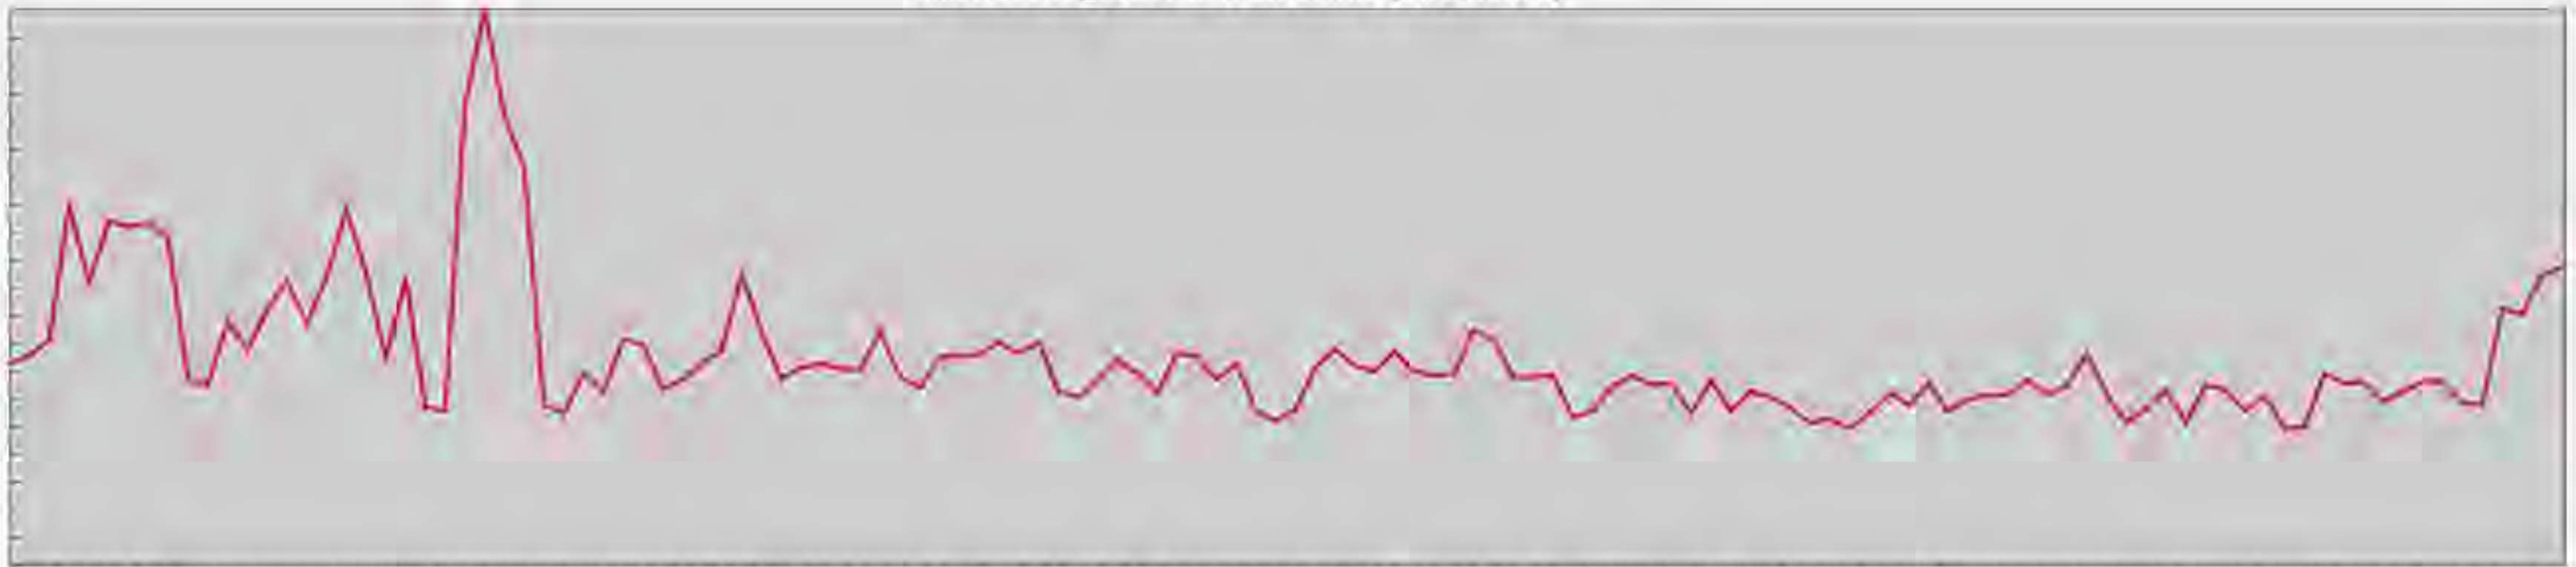

130-NALT GSM289411.CEL  
129-NALT GSM289410.CEL  
128-NALT GSM289409.CEL  
127-NALT GSM289408.CEL  
126-Colon-d9 GSM1988105.CEL  
125-Colon-d9 GSM1988104.CEL  
124-Colon-d9 GSM1988103.CEL  
123-Colon-d4 GSM1988102.CEL  
122-Colon-d4 GSM1988101.CEL  
121-Intestine-large GSM258676.CEL  
120-Intestine-large GSM258675.CEL  
119-Intestine-small GSM258678.CEL  
118-Intestine-small GSM258692.CEL  
117-Lymph-nodes GSM258691.CEL  
116-Lymph-nodes GSM258726.CEL  
115-Spleen GSM258768.CEL  
114-Spleen GSM258767.CEL  
113-Neuro2a GSM258728.CEL  
112-Neuro2a GSM258727.CEL  
111-Astrocytes GSM241898.CEL  
110-mim6 GSM258726.CEL  
109-mim6 GSM258725.CEL  
108-MIMCD3 GSM258724.CEL  
107-MIMCD3 GSM258723.CEL  
106-Bruce4 GSM258656.CEL  
105-Bruce4 GSM258655.CEL  
104-C2C12 GSM258690.CEL  
103-C2C12 GSM258629.CEL  
102-NH3T3 GSM258739.CEL  
101-NH3T3 GSM258739.CEL  
100-3T3-L1 GSM258610.CEL  
99-3T3-L1 GSM258609.CEL  
98-10T12 GSM258632.CEL  
97-10T12 GSM258631.CEL  
96-Osteoblast-d21 GSM258740.CEL  
95-Osteoblast-d21 GSM258739.CEL  
94-Osteoblast-d14 GSM258738.CEL  
93-Osteoblast-d14 GSM258737.CEL  
92-Osteoblast-d5 GSM258742.CEL  
91-Osteoblast-d5 GSM258741.CEL  
90-Chondrocytes GSM266741.CEL  
89-Chondrocytes GSM266740.CEL  
88-Nat Helper cell GSM465594.CEL  
87-Nat Helper cell GSM465593.CEL  
86-TT cell GSM465596.CEL  
85-MS-1 GSM234692.CEL  
84-Lymph-endo-cells GSM143704.CEL  
83-PP-FDC GSM481977.CEL  
82-PP-FDC GSM481978.CEL  
81-PP-FDC GSM481976.CEL  
80-LY-RMLNDCC003001.CEL  
79-LY-RMLNDCC003001.CEL  
78-Follicular-Bcells GSM258664.CEL  
77-Follicular-Bcells GSM258663.CEL  
76-MZ-Bcell GSM258627.CEL  
75-MZ-Bcell GSM258621.CEL  
74-BAF3 GSM258620.CEL  
73-BAF3 GSM258619.CEL  
72-Tregs GSM258778.CEL  
71-Tregs GSM258777.CEL  
70-T-cells-CD8+ GSM258776.CEL  
69-T-cells-CD8+ GSM258774.CEL  
68-T-cells-CD4+ GSM258773.CEL  
67-T-cells-CD4+ GSM258773.CEL  
66-Thymocyte-DN GSM465595.CEL  
65-Osteoclasts GSM258743.CEL  
64-Microglia GSM258721.CEL  
63-Microglia GSM258721.CEL  
62-MM-LPS-7h GSM258706.CEL  
61-MM-LPS-7h GSM258706.CEL  
60-MM-LPS-7h GSM258705.CEL  
59-MM-LPS-6h GSM258702.CEL  
58-MM-LPS-6h GSM258701.CEL  
57-MM-LPS-6h GSM258699.CEL  
56-MM-LPS-6h GSM258699.CEL  
55-BM258694.CEL  
54-BM258694.CEL  
53-Plasmacytoid-DC GSM258650.CEL  
52-Plasmacytoid-DC GSM258649.CEL  
51-CD8a-DC GSM258648.CEL  
50-CD8a-DC GSM258647.CEL  
49-CD8a+DC GSM258646.CEL  
48-CD8a+DC GSM258645.CEL  
47-NK-cells GSM258732.CEL  
46-NK-cells GSM258731.CEL  
45-Mast-cells-IgE+Ad GSM258718.CEL  
44-Mast-cells-IgE+Ad GSM258717.CEL  
43-Mast-cells-IgE GSM258714.CEL  
42-Mast-cells-IgE GSM258713.CEL  
41-Mast-cells GSM258712.CEL  
40-Granulocytes GSM258711.CEL  
39-Granulocytes GSM258668.CEL  
38-Granulocytes GSM258667.CEL  
37-GMP GSM258666.CEL  
36-GMP GSM258665.CEL  
35-GMP GSM258642.CEL  
34-GMP GSM258642.CEL  
33-MEP GSM258720.CEL  
32-MEP GSM258719.CEL  
31-HESC GSM258770.CEL  
30-HESC GSM258770.CEL  
29-Bone marrow GSM258628.CEL  
28-Bone marrow GSM258627.CEL  
27-paneth-cells-GE GSM116358.CEL  
26-paneth-cells-GE GSM116357.CEL  
25-paneth-cells GSM116350.CEL  
24-paneth-cells GSM116359.CEL  
23-paneth-cells GSM318589.CEL  
22-paneth-cells GSM318590.CEL  
21-Colon-Crypt GSM480375.CEL  
20-Colon-Crypt GSM480374.CEL  
19-Colon-Vill GSM480363.CEL  
18-Colon-Vill GSM480362.CEL  
17-Colon-IEC-GE GSM349880.CEL  
16-Colon-IEC-GE GSM350375.CEL  
15-Ileum-IEC GSM350376.CEL  
14-Ileum-IEC GSM350371.CEL  
13-Small-intestine-epithelium RMINEP002001.CEL  
12-Small-intestine-epithelium RMINEP001001.CEL  
11-FAE-RMPYEP002001.CEL  
10-FAE-RMPYEP001001.CEL  
09-Ileum-IEC GSM190797.CEL  
08-Ileum-IEC GSM190796.CEL  
07-Ileum-IEC GSM190795.CEL  
06-CT-w-M-cells GSM190794.CEL  
05-CT-w-M-cells GSM190793.CEL  
04-CT-w-M-cells GSM190792.CEL  
03-PP-M-cells GSM190791.CEL  
02-PP-M-cells GSM190790.CEL  
01-PP-M-cells GSM190789.CEL



Cluster0177\_House keeping (11 nodes)

1,351.6  
1,280.5  
1,209.3  
1,138.2  
1,067.1  
995.9  
924.8  
853.7  
782.5  
711.4  
640.2  
569.1  
498  
426.8  
355.7  
284.6  
213.4  
142.3  
71.1  
0

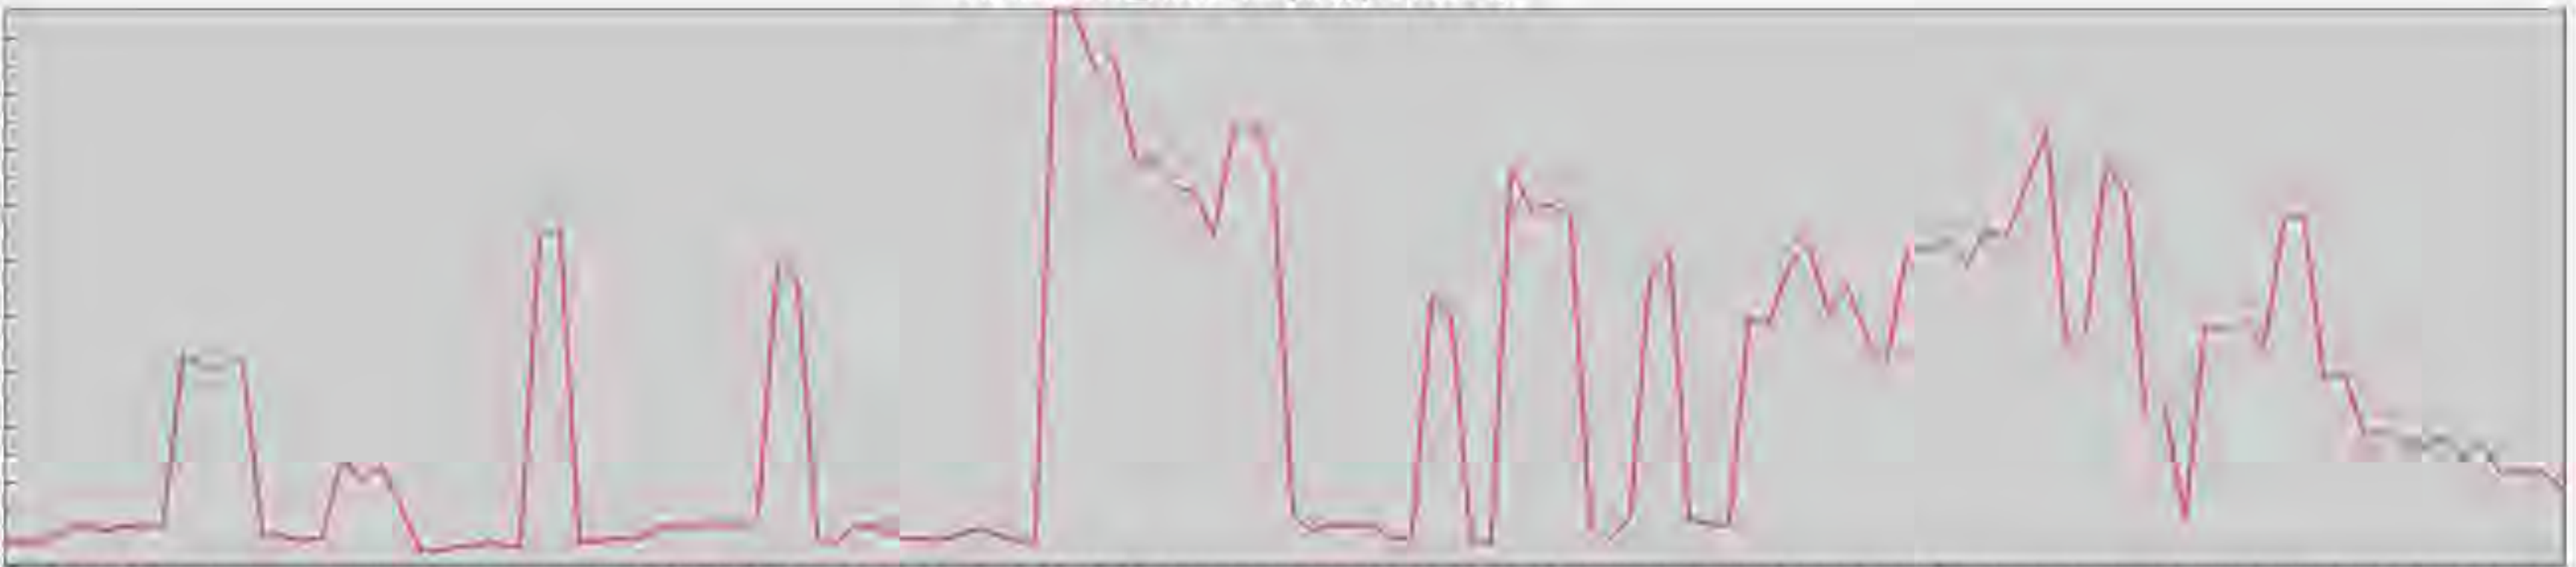

01-PP-M-cells\_GSM190789.CEL  
 02-PP-M-cells\_GSM190790.CEL  
 03-PP-M-cells\_GSM190791.CEL  
 04-CT-v-M-cells\_GSM190792.CEL  
 05-CT-v-M-cells\_GSM190793.CEL  
 06-CT-v-M-cells\_GSM190794.CEL  
 07-Ileum-IEC\_GSM190795.CEL  
 08-Ileum-IEC\_GSM190796.CEL  
 09-Ileum-IEC\_GSM190797.CEL  
 10-FAE-RMPYEP001001.CEL  
 11-FAE-RMPYEP002001.CEL  
 12-Small-intestine-epithelium\_RMINEP001001.CEL  
 13-Small-intestine-epithelium\_RMINEP002001.CEL  
 14-Ileum-IEC\_GSM350371.CEL  
 15-Ileum-IEC\_GSM350375.CEL  
 16-Colon-VIII\_GSM480362.CEL  
 17-Colon-VIII\_GSM480363.CEL  
 18-Colon-VIII\_GSM480364.CEL  
 19-Colon-VIII\_GSM480365.CEL  
 20-Colon-Crypt\_GSM480374.CEL  
 21-Colon-Crypt\_GSM480375.CEL  
 22-Paneth-cells\_GSM318589.CEL  
 23-Paneth-cells\_GSM318590.CEL  
 24-Paneth-cells\_GSM116350.CEL  
 25-Paneth-cells\_GSM116359.CEL  
 26-Paneth-cells\_GSM116357.CEL  
 27-Paneth-cells\_GSM116358.CEL  
 28-Bone marrow\_GSM258627.CEL  
 29-Bone marrow\_GSM258628.CEL  
 30-HSC\_GSM258770.CEL  
 31-MEP\_GSM258771.CEL  
 32-MEP\_GSM258772.CEL  
 33-MEP\_GSM258773.CEL  
 34-MEP\_GSM258774.CEL  
 35-CMP\_GSM258864.CEL  
 36-CMP\_GSM258865.CEL  
 37-CMP\_GSM258866.CEL  
 38-CMP\_GSM258867.CEL  
 39-Granulocytes\_GSM258668.CEL  
 40-Mast-cells\_GSM258711.CEL  
 41-Mast-cells\_GSM258712.CEL  
 42-Mast-cells\_GSM258713.CEL  
 43-Mast-cells-IdU+Ad\_GSM258714.CEL  
 44-Mast-cells-IdU+Ad\_GSM258718.CEL  
 45-Mast-cells-IdU+Ad\_GSM258717.CEL  
 46-NK-cells\_GSM258731.CEL  
 47-NK-cells\_GSM258732.CEL  
 48-CD8a+DC\_GSM258645.CEL  
 49-CD8a+DC\_GSM258646.CEL  
 50-CD8a+DC\_GSM258647.CEL  
 51-CD8a+DC\_GSM258648.CEL  
 52-Plasmacytoid-DC\_GSM258649.CEL  
 53-Plasmacytoid-DC\_GSM258650.CEL  
 54-BMM-GSM258693.CEL  
 55-BMM-GSM258694.CEL  
 56-BMM-LPS-6h\_GSM258700.CEL  
 57-BMM-LPS-6h\_GSM258701.CEL  
 58-BMM-LPS-7h\_GSM258702.CEL  
 59-BMM-LPS-7h\_GSM258705.CEL  
 60-PMN-LPS-7h\_GSM258706.CEL  
 61-PMN-LPS-7h\_GSM258705.CEL  
 62-Microglia\_GSM258721.CEL  
 63-Microglia\_GSM258722.CEL  
 64-Osteoclasts\_GSM258743.CEL  
 65-Osteoclasts\_GSM258744.CEL  
 66-Thymocyte-DN\_GSM465595.CEL  
 67-T-cells-CD4+\_GSM258773.CEL  
 68-T-cells-CD4+\_GSM258774.CEL  
 69-T-cells-CD8+\_GSM258775.CEL  
 70-T-cells-CD8+\_GSM258776.CEL  
 71-Tregs\_GSM258777.CEL  
 72-Tregs\_GSM258778.CEL  
 73-BAF3\_GSM258619.CEL  
 74-BAF3\_GSM258620.CEL  
 75-MZ-Bcell\_GSM258621.CEL  
 76-MZ-Bcell\_GSM258622.CEL  
 77-Follicular-Bcells\_GSM258664.CEL  
 78-Follicular-Bcells\_GSM258665.CEL  
 79-FLY-RMLNDC002001.CEL  
 80-FLY-RMLNDC003001.CEL  
 81-PP-FDC\_GSM481976.CEL  
 82-PP-FDC\_GSM481978.CEL  
 83-PP-FDC\_GSM481977.CEL  
 84-Lymph-endc-cells\_GSM143704.CEL  
 85-MS-1\_GSM234692.CEL  
 86-LTcell\_GSM465596.CEL  
 87-Nat Helper cell\_GSM465593.CEL  
 88-Nat Helper cell\_GSM465594.CEL  
 89-Chondrocytes\_GSM266741.CEL  
 90-Chondrocytes\_GSM266740.CEL  
 91-Osteoblast-d5\_GSM258741.CEL  
 92-Osteoblast-d5\_GSM258742.CEL  
 93-Osteoblast-d14\_GSM258737.CEL  
 94-Osteoblast-d14\_GSM258738.CEL  
 95-Osteoblast-d21\_GSM258740.CEL  
 96-Osteoblast-d21\_GSM258739.CEL  
 97-10T12\_GSM258631.CEL  
 98-10T12\_GSM258632.CEL  
 99-3T3-L1\_GSM258609.CEL  
 100-3T3-L1\_GSM258610.CEL  
 101-NH3T3\_GSM258729.CEL  
 102-NH3T3\_GSM258730.CEL  
 103-C2C12\_GSM258629.CEL  
 104-Bruce4\_GSM258690.CEL  
 105-Bruce4\_GSM258691.CEL  
 106-MIMCD3\_GSM258723.CEL  
 107-MIMCD3\_GSM258724.CEL  
 108-mim6\_GSM258725.CEL  
 109-mim6\_GSM258726.CEL  
 110-Astrocytes\_GSM241898.CEL  
 111-Astrocytes\_GSM241899.CEL  
 112-Spleen\_GSM258767.CEL  
 113-Spleen\_GSM258768.CEL  
 114-Lymph-nodes\_GSM258691.CEL  
 115-Lymph-nodes\_GSM258692.CEL  
 116-Lymph-nodes\_GSM258691.CEL  
 117-Lymph-nodes\_GSM258692.CEL  
 118-Intestine-small\_GSM258677.CEL  
 119-Intestine-small\_GSM258678.CEL  
 120-Intestine-large\_GSM258675.CEL  
 121-Intestine-large\_GSM258676.CEL  
 122-Colon-d4\_GSM198101.CEL  
 123-Colon-d4\_GSM198102.CEL  
 124-Colon-d9\_GSM198103.CEL  
 125-Colon-d9\_GSM198104.CEL  
 126-NALT\_GSM289408.CEL  
 127-NALT\_GSM289409.CEL  
 128-NALT\_GSM289410.CEL  
 129-NALT\_GSM289411.CEL



Cluster0178\_Uncertain-low in many (10 nodes)

262.7  
248.8  
235  
221.2  
207.4  
193.5  
179.7  
165.9  
152.1  
138.2  
124.4  
110.6  
96.8  
82.9  
69.1  
55.3  
41.5  
27.6  
13.8  
0

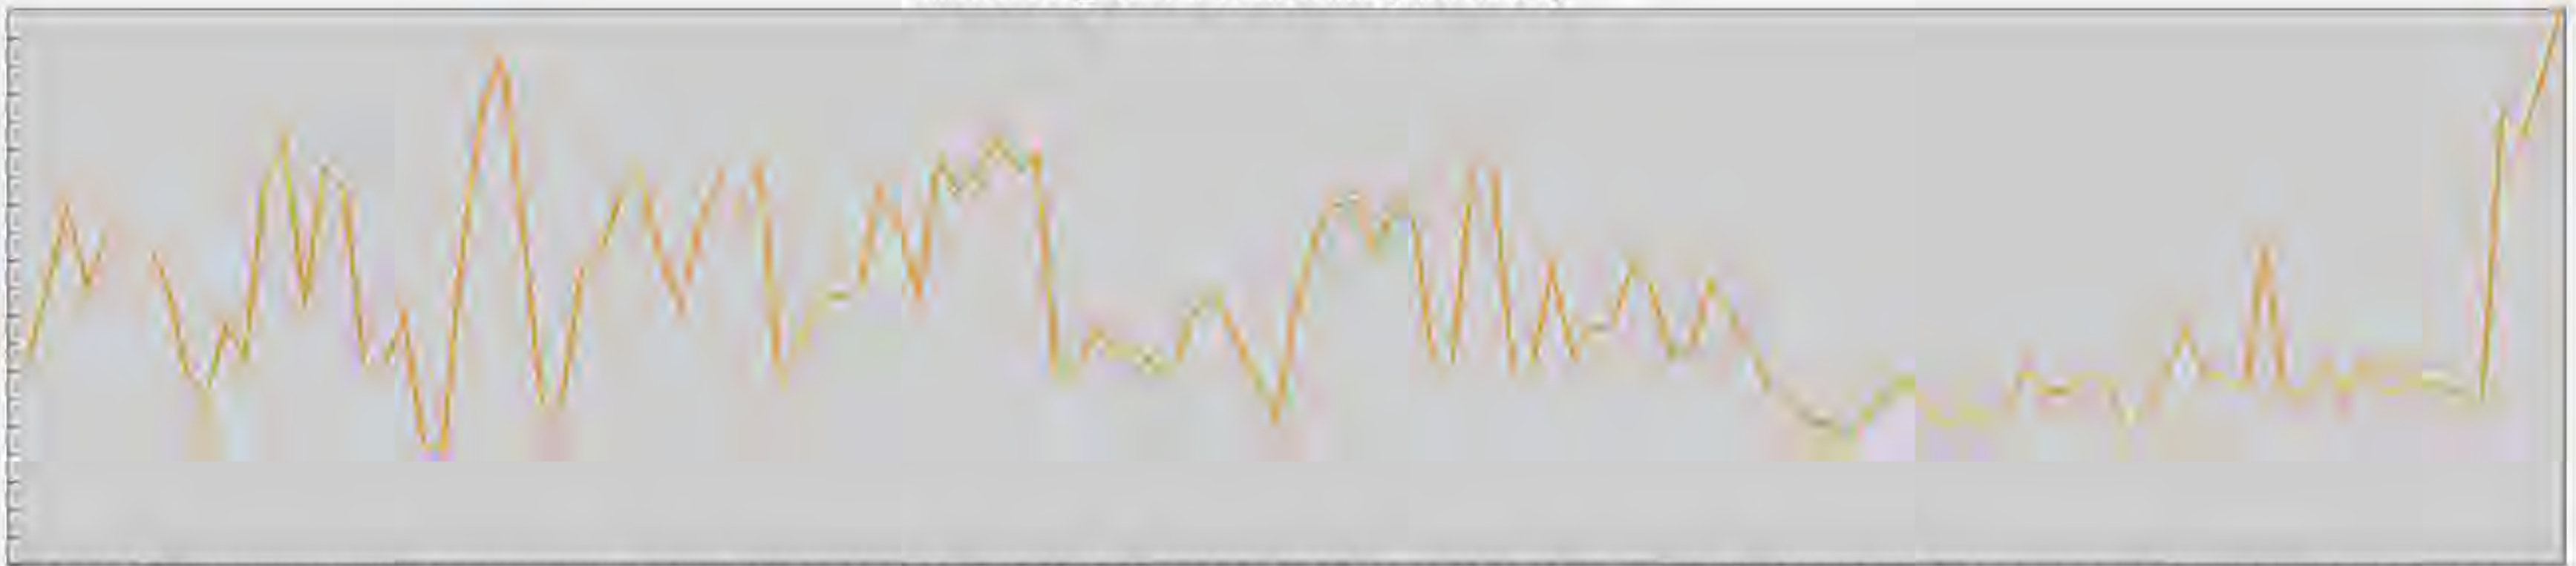

130-NALT GSM289411.CEL  
129-NALT GSM289410.CEL  
128-NALT GSM289409.CEL  
127-NALT GSM289408.CEL  
126-Column-d9 GSM1988105.CEL  
125-Column-d9 GSM1988104.CEL  
124-Column-d9 GSM1988103.CEL  
123-Column-d4 GSM1988102.CEL  
122-Column-d4 GSM1988101.CEL  
121-Intestine-large GSM258676.CEL  
120-Intestine-large GSM258675.CEL  
119-Intestine-small GSM258678.CEL  
118-Intestine-small GSM258677.CEL  
117-Lymph-nodes GSM258691.CEL  
116-Lymph-nodes GSM258676.CEL  
115-Spleen GSM258676.CEL  
114-Spleen GSM258676.CEL  
113-Neuro2a GSM258727.CEL  
112-Neuro2a GSM258727.CEL  
111-Astrocytes GSM241898.CEL  
110-ming GSM258726.CEL  
109-ming GSM258725.CEL  
108-MIMCD3 GSM258724.CEL  
107-MIMCD3 GSM258723.CEL  
106-Bruce4 GSM258656.CEL  
105-Bruce4 GSM258656.CEL  
104-C2C12 GSM258690.CEL  
103-C2C12 GSM258629.CEL  
102-NH3T3 GSM258739.CEL  
101-NH3T3 GSM258739.CEL  
100-3T3-L1 GSM258610.CEL  
99-3T3-L1 GSM258609.CEL  
98-10T12 GSM258631.CEL  
97-10T12 GSM258631.CEL  
96-Osteoblast-d21 GSM258740.CEL  
95-Osteoblast-d21 GSM258739.CEL  
94-Osteoblast-d14 GSM258738.CEL  
93-Osteoblast-d14 GSM258737.CEL  
92-Osteoblast-d5 GSM258742.CEL  
91-Osteoblast-d5 GSM258741.CEL  
90-Chondrocytes GSM266741.CEL  
89-Chondrocytes GSM266740.CEL  
88-Nat Helper cell GSM465594.CEL  
87-Nat Helper cell GSM465593.CEL  
86-LT cell GSM465596.CEL  
85-MS-1 GSM234692.CEL  
84-Lymph-endo-cells GSM143704.CEL  
83-PP-FDC GSM481977.CEL  
82-PP-FDC GSM481978.CEL  
81-PP-FDC GSM481976.CEL  
80-FLY RMLNDCC003001.CEL  
79-FLY RMLNDCC003001.CEL  
78-Follicular-Bcells GSM258664.CEL  
77-Follicular-Bcells GSM258622.CEL  
76-MZ-Bcell GSM258621.CEL  
75-MZ-Bcell GSM258621.CEL  
74-BAF3 GSM258620.CEL  
73-BAF3 GSM258619.CEL  
72-Tregs GSM258778.CEL  
71-Tregs GSM258777.CEL  
70-T-cells-CD8+ GSM258776.CEL  
69-T-cells-CD8+ GSM258775.CEL  
68-T-cells-CD4+ GSM258774.CEL  
67-T-cells-CD4+ GSM258773.CEL  
66-Thymocyte-DN GSM465595.CEL  
65-Osteoclasts GSM258744.CEL  
64-Osteoclasts GSM258743.CEL  
63-Microglia GSM258721.CEL  
62-Microglia GSM258721.CEL  
61-PMN-LPS-7h GSM258706.CEL  
60-PMN-LPS-7h GSM258705.CEL  
59-PMN-GSM258702.CEL  
58-PMN-GSM258701.CEL  
57-BMM-LPS-6h GSM258700.CEL  
56-BMM-LPS-6h GSM258699.CEL  
55-BMM-GSM258694.CEL  
54-BMM-GSM258693.CEL  
53-Plasmacytoid-DC GSM258650.CEL  
52-CD8a-DC GSM258649.CEL  
51-CD8a-DC GSM258647.CEL  
50-CD8a-DC GSM258647.CEL  
49-CD8a+DC GSM258646.CEL  
48-CD8a+DC GSM258645.CEL  
47-NK-cells GSM258732.CEL  
46-NK-cells GSM258731.CEL  
45-Mast-cells-IgE+Ad GSM258718.CEL  
44-Mast-cells-IgE+Ad GSM258717.CEL  
43-Mast-cells-IgE GSM258714.CEL  
42-Mast-cells-IgE GSM258713.CEL  
41-Mast-cells GSM258712.CEL  
40-Granulocytes GSM258668.CEL  
39-Granulocytes GSM258667.CEL  
38-GMP GSM258666.CEL  
37-GMP GSM258665.CEL  
36-GMP GSM258664.CEL  
35-GMP GSM258642.CEL  
34-MEP GSM258854.CEL  
33-MEP GSM258720.CEL  
32-MEP GSM258719.CEL  
31-H9C GSM258770.CEL  
30-H9C GSM258770.CEL  
29-Bone marrow GSM258628.CEL  
28-Bone marrow GSM258627.CEL  
27-Paneth-cells-GF-1 GSM116358.CEL  
26-Paneth-cells-GF-1 GSM116357.CEL  
25-Paneth-cells GSM116350.CEL  
24-Paneth-cells GSM116359.CEL  
23-Paneth-cells GSM318589.CEL  
22-Paneth-cells GSM318590.CEL  
21-Column-Crypt GSM480375.CEL  
20-Column-Crypt GSM480374.CEL  
19-Column-Vill GSM480363.CEL  
18-Column-Vill GSM480362.CEL  
17-Column-IEC-GF GSM349880.CEL  
16-Column-IEC-GF GSM350375.CEL  
15-Ileum-IEC-TGF GSM350376.CEL  
14-Ileum-IEC GSM350371.CEL  
13-Small-intestine-epithelium RMINEP002901.CEL  
12-Small-intestine-epithelium RMINEP001001.CEL  
11-FAE-RMPYEP002001.CEL  
10-FAE-RMPYEP001001.CEL  
09-Ileum-IEC GSM190797.CEL  
08-Ileum-IEC GSM190796.CEL  
07-Ileum-IEC GSM190795.CEL  
06-CT-v-M-cells GSM190794.CEL  
05-CT-v-M-cells GSM190793.CEL  
04-PP-M-cells GSM190792.CEL  
03-PP-M-cells GSM190790.CEL  
02-PP-M-cells GSM190790.CEL  
01-PP-M-cells GSM190789.CEL



Cluster0179\_Uncertain-low in many (10 nodes)

81.1  
76.9  
72.6  
68.3  
64.1  
59.8  
55.5  
51.2  
47  
42.7  
38.4  
34.2  
29.9  
25.6  
21.4  
17.1  
12.8  
8.5  
4.3  
0

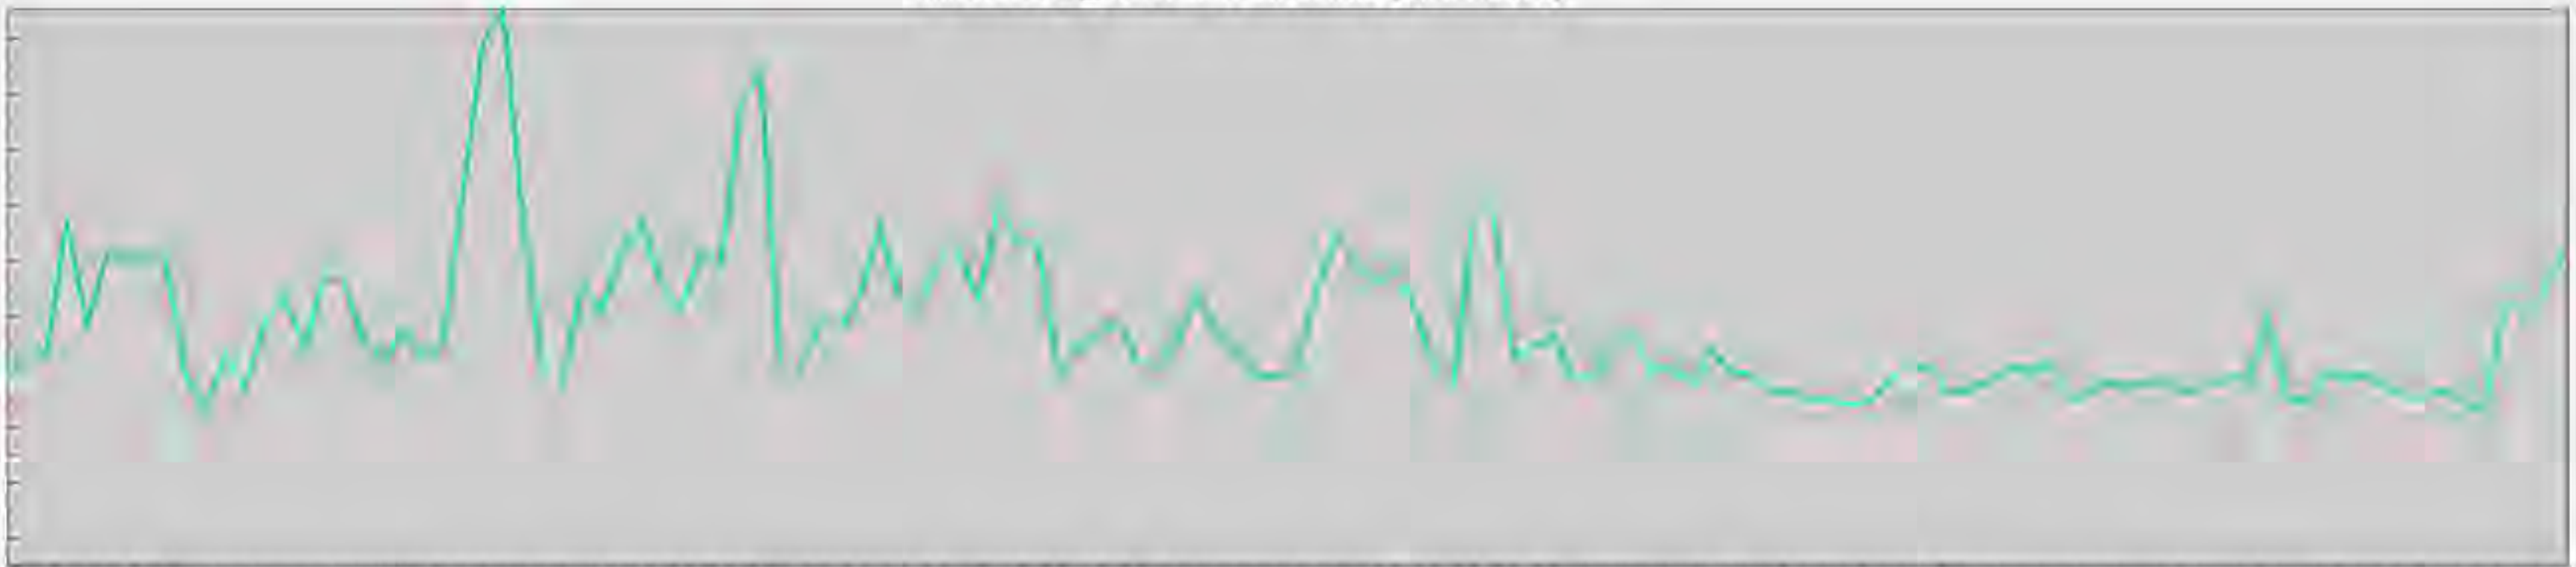

130-NALT GSM289411.CEL  
129-NALT GSM289410.CEL  
128-NALT GSM289409.CEL  
127-NALT GSM289408.CEL  
126-Colon-d9 GSM1988105.CEL  
125-Colon-d9 GSM1988104.CEL  
124-Colon-d9 GSM1988103.CEL  
123-Colon-d4 GSM1988102.CEL  
122-Colon-d4 GSM1988101.CEL  
121-Intestine-large GSM258676.CEL  
120-Intestine-large GSM258675.CEL  
119-Intestine-small GSM258678.CEL  
118-Intestine-small GSM258692.CEL  
117-Lymph-nodes GSM258691.CEL  
116-Lymph-nodes GSM258726.CEL  
115-Spleen GSM258767.CEL  
114-Spleen GSM258767.CEL  
113-Neuro2a GSM258728.CEL  
112-Neuro2a GSM258727.CEL  
111-Astrocytes GSM241898.CEL  
110-mim6 GSM258726.CEL  
109-mim6 GSM258725.CEL  
108-MIMCD3 GSM258724.CEL  
107-MIMCD3 GSM258723.CEL  
106-Bruce4 GSM258656.CEL  
105-Bruce4 GSM258656.CEL  
104-C2C12 GSM258690.CEL  
103-C2C12 GSM258629.CEL  
102-NH3T3 GSM258739.CEL  
101-NH3T3 GSM258739.CEL  
100-3T3-L1 GSM258610.CEL  
99-3T3-L1 GSM258609.CEL  
98-10T12 GSM258632.CEL  
97-10T12 GSM258631.CEL  
96-Osteoblast-d21 GSM258740.CEL  
95-Osteoblast-d21 GSM258739.CEL  
94-Osteoblast-d14 GSM258738.CEL  
93-Osteoblast-d14 GSM258737.CEL  
92-Osteoblast-d5 GSM258742.CEL  
91-Osteoblast-d5 GSM258741.CEL  
90-Chondrocytes GSM266741.CEL  
89-Chondrocytes GSM266740.CEL  
88-Nat Helper cell GSM465594.CEL  
87-Nat Helper cell GSM465593.CEL  
86-TT cell GSM465596.CEL  
85-MS-1 GSM234692.CEL  
84-Lymph-endc-cells GSM143704.CEL  
83-PP-FDC GSM481977.CEL  
82-PP-FDC GSM481978.CEL  
81-PP-FDC GSM481976.CEL  
80-LY-RMLNDCC003001.CEL  
79-LY-RMLNDCC003001.CEL  
78-Follicular-Bcells GSM258664.CEL  
77-Follicular-Bcells GSM258664.CEL  
76-MZ-Bcell GSM258627.CEL  
75-MZ-Bcell GSM258627.CEL  
74-BAF3 GSM258620.CEL  
73-BAF3 GSM258619.CEL  
72-Tregs GSM258778.CEL  
71-Tregs GSM258777.CEL  
70-T-cells-CD8+ GSM258776.CEL  
69-T-cells-CD8+ GSM258774.CEL  
68-T-cells-CD4+ GSM258773.CEL  
67-T-cells-CD4+ GSM258773.CEL  
66-Thymocyte-DN GSM465595.CEL  
65-Osteoclasts GSM258743.CEL  
64-Osteoclasts GSM258743.CEL  
63-Microglia GSM258721.CEL  
62-Microglia GSM258721.CEL  
61-PM-M-PS-7h GSM258706.CEL  
60-PM-M-PS-7h GSM258706.CEL  
59-PM-M-PS-6h GSM258702.CEL  
58-PM-M-PS-6h GSM258702.CEL  
57-BMM-LPS-6h GSM258699.CEL  
56-BMM-LPS-6h GSM258699.CEL  
55-BMM-LPS-6h GSM258699.CEL  
54-BMM-LPS-6h GSM258699.CEL  
53-Plasmacytoid-DC GSM258650.CEL  
52-Plasmacytoid-DC GSM258649.CEL  
51-CD8a-DC GSM258647.CEL  
50-CD8a-DC GSM258647.CEL  
49-CD8a+DC GSM258646.CEL  
48-CD8a+DC GSM258646.CEL  
47-NK-cells GSM258732.CEL  
46-NK-cells GSM258732.CEL  
45-Mast-cells-IgE+Ad GSM258718.CEL  
44-Mast-cells-IgE+Ad GSM258717.CEL  
43-Mast-cells-IgE GSM258714.CEL  
42-Mast-cells-IgE GSM258713.CEL  
41-Mast-cells GSM258712.CEL  
40-Granulocytes GSM258668.CEL  
39-Granulocytes GSM258667.CEL  
38-GMP GSM258666.CEL  
37-GMP GSM258666.CEL  
36-GMP GSM258666.CEL  
35-CMP GSM258642.CEL  
34-CMP GSM258642.CEL  
33-MEP GSM258720.CEL  
32-MEP GSM258719.CEL  
31-HSC GSM258770.CEL  
30-HSC GSM258770.CEL  
29-Bone marrow GSM258628.CEL  
28-Bone marrow GSM258627.CEL  
27-paneth-cells-GE GSM116358.CEL  
26-paneth-cells-GE GSM116357.CEL  
25-paneth-cells GSM116350.CEL  
24-paneth-cells GSM116359.CEL  
23-paneth-cells GSM318589.CEL  
22-paneth-cells GSM318590.CEL  
21-Colon-Crypt GSM480375.CEL  
20-Colon-Crypt GSM480374.CEL  
19-Colon-Vill GSM480363.CEL  
18-Colon-Vill GSM480362.CEL  
17-Colon-IEC-GE GSM349880.CEL  
16-Colon-IEC-GE GSM350375.CEL  
15-Ileum-IEC-TGF GSM350376.CEL  
14-Ileum-IEC GSM350371.CEL  
13-Small-intestine-epithelium RMINEP002001.CEL  
12-Small-intestine-epithelium RMINEP001001.CEL  
11-FAE-RMPYEP002001.CEL  
10-FAE-RMPYEP001001.CEL  
09-Ileum-IEC GSM190797.CEL  
08-Ileum-IEC GSM190796.CEL  
07-Ileum-IEC GSM190795.CEL  
06-CT-v-M-cells GSM190794.CEL  
05-CT-v-M-cells GSM190793.CEL  
04-PP-M-cells GSM190792.CEL  
03-PP-M-cells GSM190791.CEL  
02-PP-M-cells GSM190790.CEL  
01-PP-M-cells GSM190789.CEL



Cluster0180\_High in Bruce4 cells (10 nodes)

932.8  
883.7  
834.6  
785.5  
736.4  
687.3  
638.3  
589.2  
540.1  
491  
441.9  
392.8  
343.7  
294.6  
245.5  
196.4  
147.3  
98.2  
49.1  
0

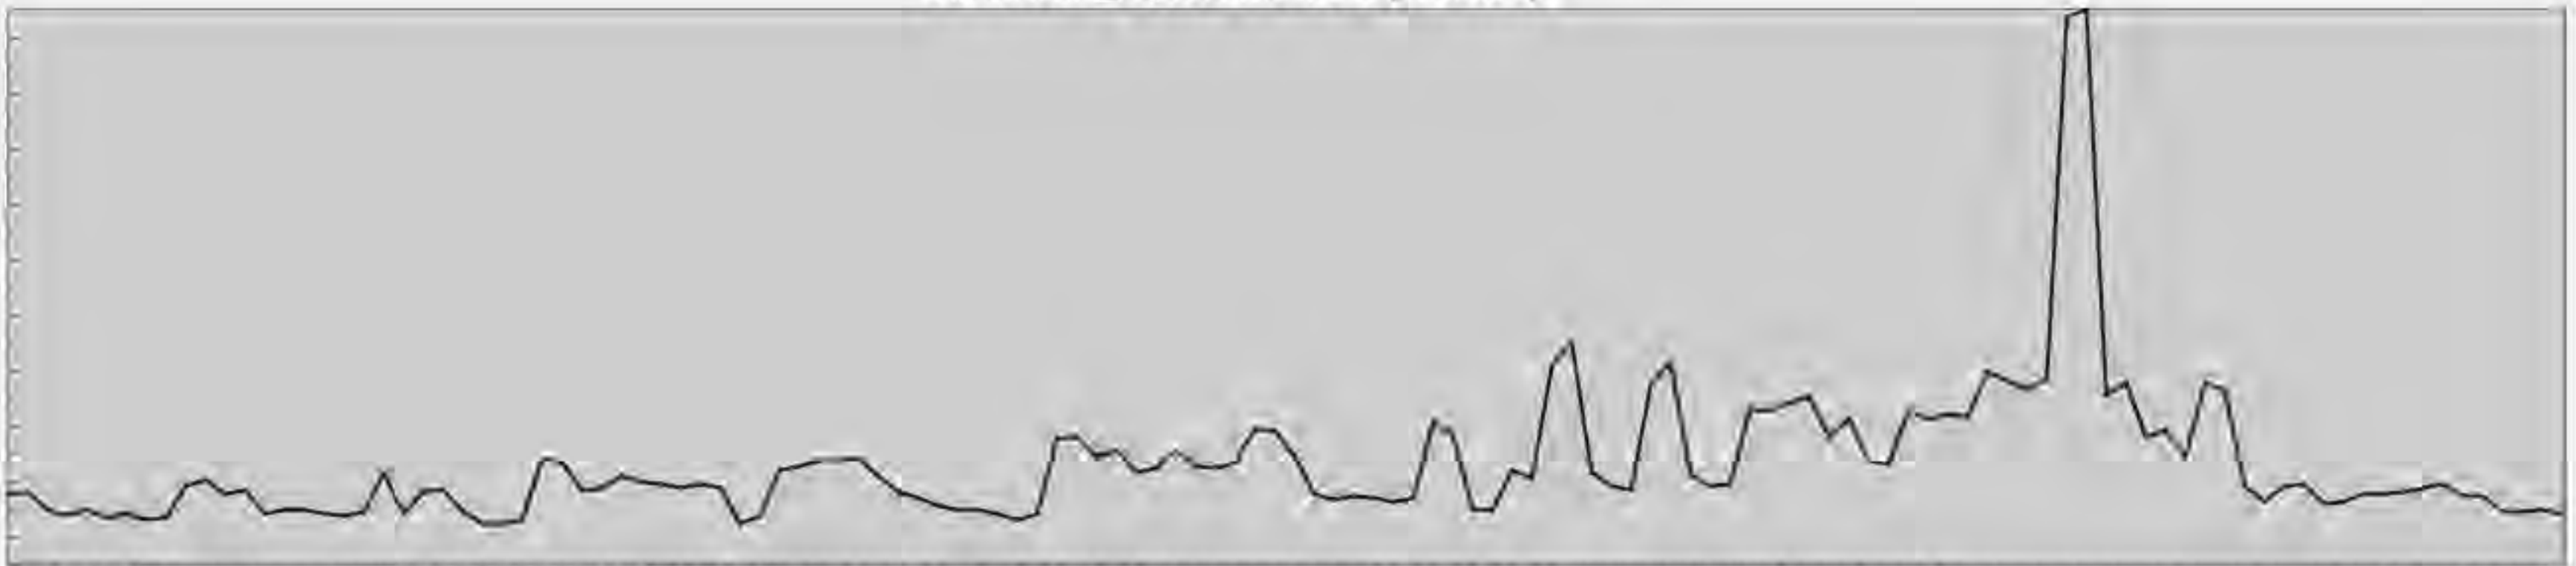

30-NALT GSM289411 CELL  
 129-NALT GSM289410 CELL  
 128-NALT GSM289409 CELL  
 127-NALT GSM289408 CELL  
 126-Color-d9 GSM1988105 CELL  
 125-Color-d9 GSM1988104 CELL  
 124-Color-d9 GSM1988103 CELL  
 123-Color-d4 GSM1988102 CELL  
 122-Color-d4 GSM1988101 CELL  
 121-Intestine-large GSM258676 CELL  
 120-Intestine-large GSM258675 CELL  
 119-Intestine-small GSM258674 CELL  
 118-Intestine-small GSM258673 CELL  
 117-Lymph-nodes GSM258672 CELL  
 116-Spleen GSM258671 CELL  
 115-Spleen GSM258670 CELL  
 114-Spleen GSM258669 CELL  
 113-Neuro2a GSM241898 CELL  
 112-Neuro2a GSM241897 CELL  
 111-Astrocytes GSM241896 CELL  
 110-mimb GSM258726 CELL  
 109-mimb GSM258725 CELL  
 108-mimb GSM258724 CELL  
 107-MIMCD3 GSM258723 CELL  
 106-MIMCD3 GSM258722 CELL  
 105-MIMCD3 GSM258721 CELL  
 104-Bruce4 GSM258720 CELL  
 103-C2C12 GSM258719 CELL  
 102-NH3T3 GSM258718 CELL  
 101-NH3T3 GSM258717 CELL  
 100-3T3-L1 GSM258610 CELL  
 99-3T3-L1 GSM258609 CELL  
 98-10T12 GSM258632 CELL  
 97-10T12 GSM258631 CELL  
 96-Osteoblast-d21 GSM258740 CELL  
 95-Osteoblast-d21 GSM258739 CELL  
 94-Osteoblast-d14 GSM258738 CELL  
 93-Osteoblast-d14 GSM258737 CELL  
 92-Osteoblast-d5 GSM258742 CELL  
 91-Osteoblast-d5 GSM258741 CELL  
 90-Chondrocytes GSM266741 CELL  
 89-Chondrocytes GSM266740 CELL  
 88-Nat Helper cell GSM465594 CELL  
 87-Nat Helper cell GSM465593 CELL  
 86-T cell GSM465596 CELL  
 85-MS-1 GSM234692 CELL  
 84-Lymph-endo-cells GSM143704 CELL  
 83-P-FDC GSM481977 CELL  
 82-P-FDC GSM481978 CELL  
 81-P-FDC GSM481976 CELL  
 80-LY RMLNDCC003001 CELL  
 79-LY RMLNDCC003001 CELL  
 78-Follicular-Bcells GSM258664 CELL  
 77-Follicular-Bcells GSM258663 CELL  
 76-MZ-Bcell GSM258627 CELL  
 75-MZ-Bcell GSM258621 CELL  
 74-BAF3 GSM258620 CELL  
 73-BAF3 GSM258619 CELL  
 72-Tregs GSM258778 CELL  
 71-Tregs GSM258777 CELL  
 70-T-cells-CD8+ GSM258776 CELL  
 69-T-cells-CD8+ GSM258774 CELL  
 68-T-cells-CD4+ GSM258773 CELL  
 67-T-cells-CD4+ GSM258744 CELL  
 66-Thymocyte-DN GSM465595 CELL  
 65-Osteoclasts GSM258743 CELL  
 64-Microglia GSM258721 CELL  
 63-Microglia GSM258721 CELL  
 62-MM-LPS-7h GSM268706 CELL  
 61-MM-LPS-7h GSM268705 CELL  
 60-MM-LPS-6h GSM258702 CELL  
 59-MM-LPS-6h GSM258701 CELL  
 58-MM-LPS-6h GSM258699 CELL  
 57-MM-LPS-6h GSM258699 CELL  
 56-MM-LPS-6h GSM258694 CELL  
 55-MM-LPS-6h GSM258694 CELL  
 54-Ismacryoid-DC GSM258650 CELL  
 53-Ismacryoid-DC GSM258649 CELL  
 52-CD8a-DC GSM258647 CELL  
 51-CD8a-DC GSM258647 CELL  
 50-CD8a+DC GSM258646 CELL  
 49-CD8a+DC GSM258646 CELL  
 48-NK-cells GSM258732 CELL  
 47-NK-cells GSM258731 CELL  
 46-Mast-cells-IgE+Ad GSM258718 CELL  
 45-Mast-cells-IgE+Ad GSM258717 CELL  
 44-Mast-cells-IgE GSM258714 CELL  
 43-Mast-cells-IgE GSM258713 CELL  
 42-Mast-cells-IgE GSM258712 CELL  
 41-Mast-cells-IgE GSM258712 CELL  
 40-Granulocytes GSM258667 CELL  
 39-Granulocytes GSM258667 CELL  
 38-GMP GSM258666 CELL  
 37-GMP GSM258666 CELL  
 36-GMP GSM258665 CELL  
 35-GMP GSM258665 CELL  
 34-MUEP GSM258874 CELL  
 33-MUEP GSM258874 CELL  
 32-MUEP GSM258874 CELL  
 31-HESC GSM258770 CELL  
 30-HESC GSM258770 CELL  
 29-Bone marrow GSM258628 CELL  
 28-Bone marrow GSM258627 CELL  
 27-paneth-cells-GF-1 GSM116357 CELL  
 26-paneth-cells-GF-1 GSM116357 CELL  
 25-paneth-cells GSM116350 CELL  
 24-paneth-cells GSM116359 CELL  
 23-paneth-cells GSM318589 CELL  
 22-paneth-cells GSM318590 CELL  
 21-paneth-cells GSM480375 CELL  
 20-Color-Crypt GSM480374 CELL  
 19-Color-Vill GSM480363 CELL  
 18-Color-Vill GSM480362 CELL  
 17-Color-IEC-GF GSM349880 CELL  
 16-Color-IEC-GF GSM350375 CELL  
 15-Ileum-IEC-GF GSM350376 CELL  
 14-Ileum-IEC GSM350371 CELL  
 13-Small-intestine-epithelium RMINEP002001 CELL  
 12-Small-intestine-epithelium RMINEP001001 CELL  
 11-FAE-RMPYEP001001 CELL  
 10-FAE-RMPYEP001001 CELL  
 09-Ileum-IEC GSM190797 CELL  
 08-Ileum-IEC GSM190796 CELL  
 07-Ileum-IEC GSM190795 CELL  
 06-CT-w-M-cells GSM190794 CELL  
 05-CT-w-M-cells GSM190793 CELL  
 04-CT-y-M-cells GSM190792 CELL  
 03-PP-M-cells GSM190791 CELL  
 02-PP-M-cells GSM190790 CELL  
 01-PP-M-cells GSM190789 CELL



Cluster0181\_Small intestine-related (10 nodes)

642.9  
809  
575.2  
541.4  
507.5  
473.7  
439.9  
406  
372.2  
338.3  
304.5  
270.7  
236.8  
203  
169.2  
135.3  
101.5  
67.7  
33.8  
0

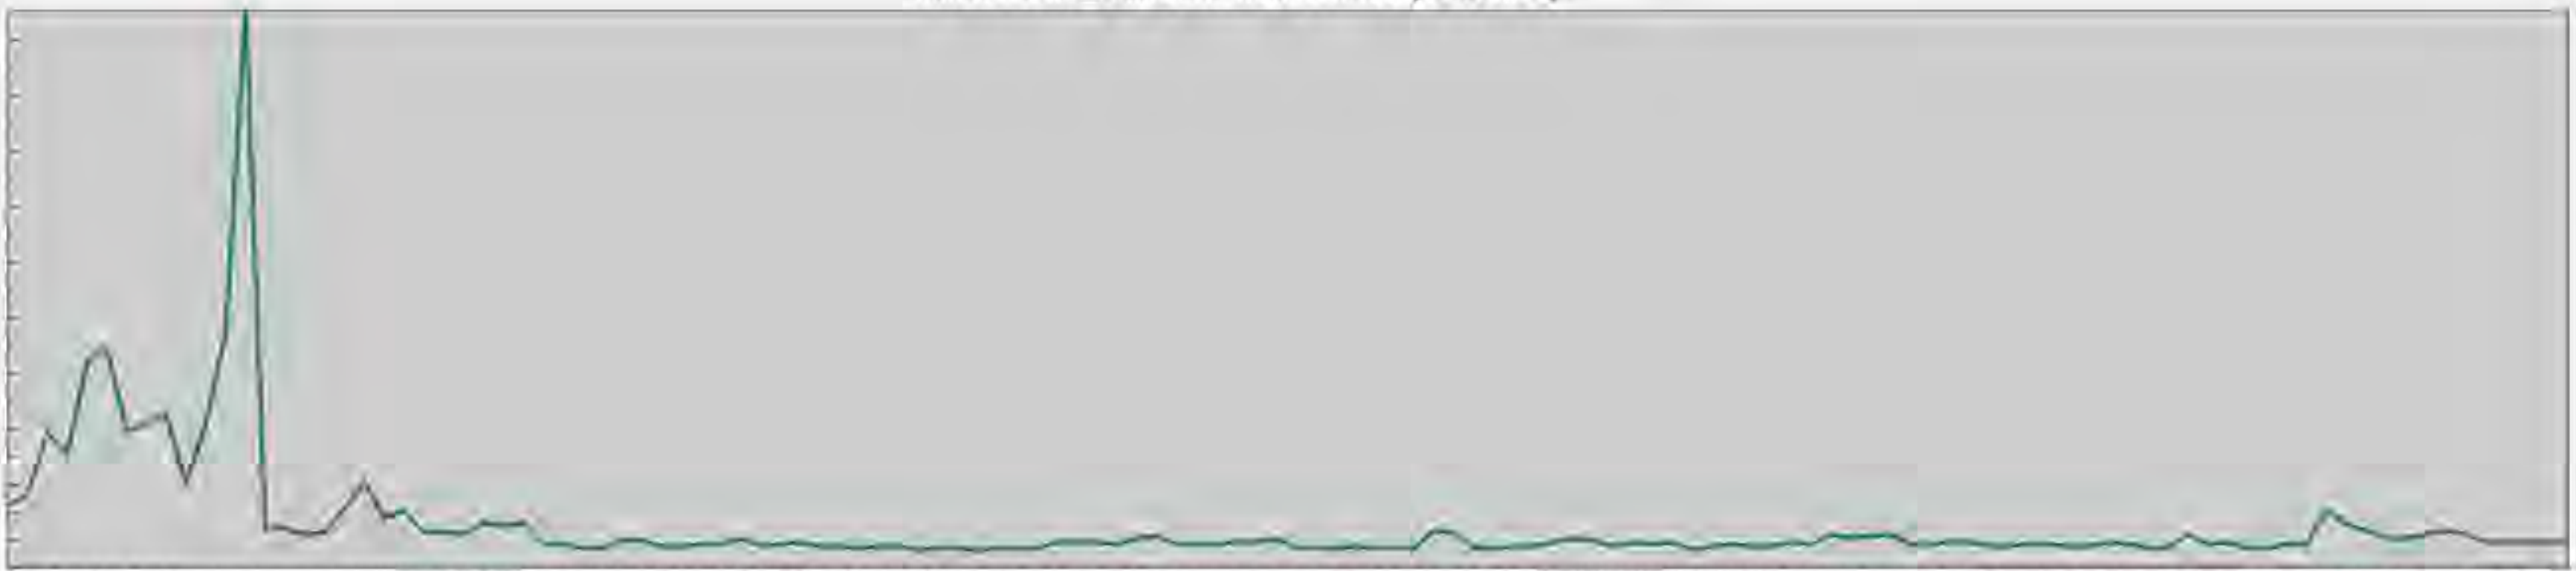

01-PP-M-cells\_GSM190789.CEL  
 02-PP-M-cells\_GSM190790.CEL  
 03-PP-M-cells\_GSM190791.CEL  
 04-CT-Y-M-cells\_GSM190792.CEL  
 05-CT-Y-M-cells\_GSM190793.CEL  
 06-CT-W-M-cells\_GSM190794.CEL  
 07-Ileum-IEC\_GSM190795.CEL  
 08-Ileum-IEC\_GSM190796.CEL  
 09-Ileum-IEC\_GSM190797.CEL  
 10-FAE-RMPYEP001001.CEL  
 11-FAE-RMPYEP002001.CEL  
 12-SmallIntestine-epithelium\_RMINEP001001.CEL  
 13-SmallIntestine-epithelium\_RMINEP002001.CEL  
 14-Ileum-IEC\_GSM350371.CEL  
 15-Ileum-IEC\_GSM350375.CEL  
 16-Colon-IEC-Gf\_GSM349880.CEL  
 17-Colon-VIII\_GSM480362.CEL  
 18-Colon-VIII\_GSM480363.CEL  
 19-Colon-VIII\_GSM480364.CEL  
 20-Colon-Crypt\_GSM480374.CEL  
 21-Colon-Crypt\_GSM480375.CEL  
 22-Paneth-cells\_GSM318590.CEL  
 23-Paneth-cells\_GSM318591.CEL  
 24-Paneth-cells\_GSM116359.CEL  
 25-Paneth-cells\_GSM116359.CEL  
 26-Paneth-cells-Gf-1\_GSM116357.CEL  
 27-Paneth-cells-Gf-1\_GSM116357.CEL  
 28-Bone marrow\_GSM258827.CEL  
 29-Bone marrow\_GSM258827.CEL  
 30-HSC\_GSM258770.CEL  
 31-MEP\_GSM258770.CEL  
 32-MEP\_GSM258770.CEL  
 33-MEP\_GSM258770.CEL  
 34-MEP\_GSM258770.CEL  
 35-MEP\_GSM258770.CEL  
 36-MEP\_GSM258770.CEL  
 37-MEP\_GSM258770.CEL  
 38-MEP\_GSM258770.CEL  
 39-Granulocytes\_GSM258770.CEL  
 40-Mast-cells\_GSM258770.CEL  
 41-Mast-cells-Gf\_GSM258770.CEL  
 42-Mast-cells-Gf\_GSM258770.CEL  
 43-Mast-cells-Gf\_GSM258770.CEL  
 44-Mast-cells-Gf\_GSM258770.CEL  
 45-Mast-cells-Gf\_GSM258770.CEL  
 46-NK-cells\_GSM258770.CEL  
 47-NK-cells\_GSM258770.CEL  
 48-CD8a+DC\_GSM258646.CEL  
 49-CD8a+DC\_GSM258646.CEL  
 50-CD8a+DC\_GSM258646.CEL  
 51-CD8a+DC\_GSM258646.CEL  
 52-CD8a+DC\_GSM258646.CEL  
 53-CD8a+DC\_GSM258646.CEL  
 54-CD8a+DC\_GSM258646.CEL  
 55-CD8a+DC\_GSM258646.CEL  
 56-CD8a+DC\_GSM258646.CEL  
 57-CD8a+DC\_GSM258646.CEL  
 58-CD8a+DC\_GSM258646.CEL  
 59-CD8a+DC\_GSM258646.CEL  
 60-CD8a+DC\_GSM258646.CEL  
 61-CD8a+DC\_GSM258646.CEL  
 62-Microglia\_GSM258721.CEL  
 63-Microglia\_GSM258721.CEL  
 64-Osteoclasts\_GSM258743.CEL  
 65-Osteoclasts\_GSM258743.CEL  
 66-Thymocyte-DN\_GSM465595.CEL  
 67-T-cells-CD4+\_GSM258773.CEL  
 68-T-cells-CD4+\_GSM258773.CEL  
 69-T-cells-CD8+\_GSM258776.CEL  
 70-T-cells-CD8+\_GSM258776.CEL  
 71-Tregs\_GSM258778.CEL  
 72-Tregs\_GSM258778.CEL  
 73-Tregs\_GSM258778.CEL  
 74-BAF3\_GSM258620.CEL  
 75-BAF3\_GSM258620.CEL  
 76-MZ-Bcell\_GSM258622.CEL  
 77-Follicular-Bcells\_GSM258653.CEL  
 78-Follicular-Bcells\_GSM258653.CEL  
 79-Follicular-Bcells\_GSM258653.CEL  
 80-LY-RMLNDC002001.CEL  
 81-LY-RMLNDC003001.CEL  
 82-LY-RMLNDC003001.CEL  
 83-LY-RMLNDC003001.CEL  
 84-LY-RMLNDC003001.CEL  
 85-LY-RMLNDC003001.CEL  
 86-LY-RMLNDC003001.CEL  
 87-NatHelperCell\_GSM465593.CEL  
 88-NatHelperCell\_GSM465593.CEL  
 89-NatHelperCell\_GSM465593.CEL  
 90-Chondrocytes\_GSM258741.CEL  
 91-Chondrocytes\_GSM258741.CEL  
 92-Osteoblast-d5\_GSM258742.CEL  
 93-Osteoblast-d5\_GSM258742.CEL  
 94-Osteoblast-d14\_GSM258737.CEL  
 95-Osteoblast-d21\_GSM258738.CEL  
 96-Osteoblast-d21\_GSM258738.CEL  
 97-Osteoblast-d21\_GSM258738.CEL  
 98-Osteoblast-d21\_GSM258738.CEL  
 99-Osteoblast-d21\_GSM258738.CEL  
 100-3T3-L1\_GSM258610.CEL  
 101-3T3-L1\_GSM258610.CEL  
 102-NH3T3\_GSM258739.CEL  
 103-NH3T3\_GSM258739.CEL  
 104-C2C12\_GSM258829.CEL  
 105-C2C12\_GSM258829.CEL  
 106-Bruce4\_GSM258869.CEL  
 107-Bruce4\_GSM258869.CEL  
 108-MIMCD3\_GSM258724.CEL  
 109-MIMCD3\_GSM258724.CEL  
 110-mim6\_GSM258725.CEL  
 111-mim6\_GSM258725.CEL  
 112-Astrocytes\_GSM241898.CEL  
 113-Astrocytes\_GSM241898.CEL  
 114-Spleen\_GSM258767.CEL  
 115-Spleen\_GSM258767.CEL  
 116-Spleen\_GSM258767.CEL  
 117-Lymph-nodes\_GSM258691.CEL  
 118-Lymph-nodes\_GSM258691.CEL  
 119-Intestine-small\_GSM258678.CEL  
 120-Intestine-small\_GSM258678.CEL  
 121-Intestine-large\_GSM258676.CEL  
 122-Intestine-large\_GSM258676.CEL  
 123-Intestine-large\_GSM258676.CEL  
 124-Intestine-large\_GSM258676.CEL  
 125-Intestine-large\_GSM258676.CEL  
 126-Intestine-large\_GSM258676.CEL  
 127-NALT\_GSM289408.CEL  
 128-NALT\_GSM289408.CEL  
 129-NALT\_GSM289410.CEL  
 130-NALT\_GSM289411.CEL











Cluster0184\_High in NK cells, T cells and B cells (10 nodes)

211.9  
200.8  
189.6  
178.4  
167.3  
156.1  
145  
133.8  
122.7  
111.5  
100.4  
89.2  
78.1  
66.9  
55.8  
44.6  
33.5  
22.3  
11.2  
0

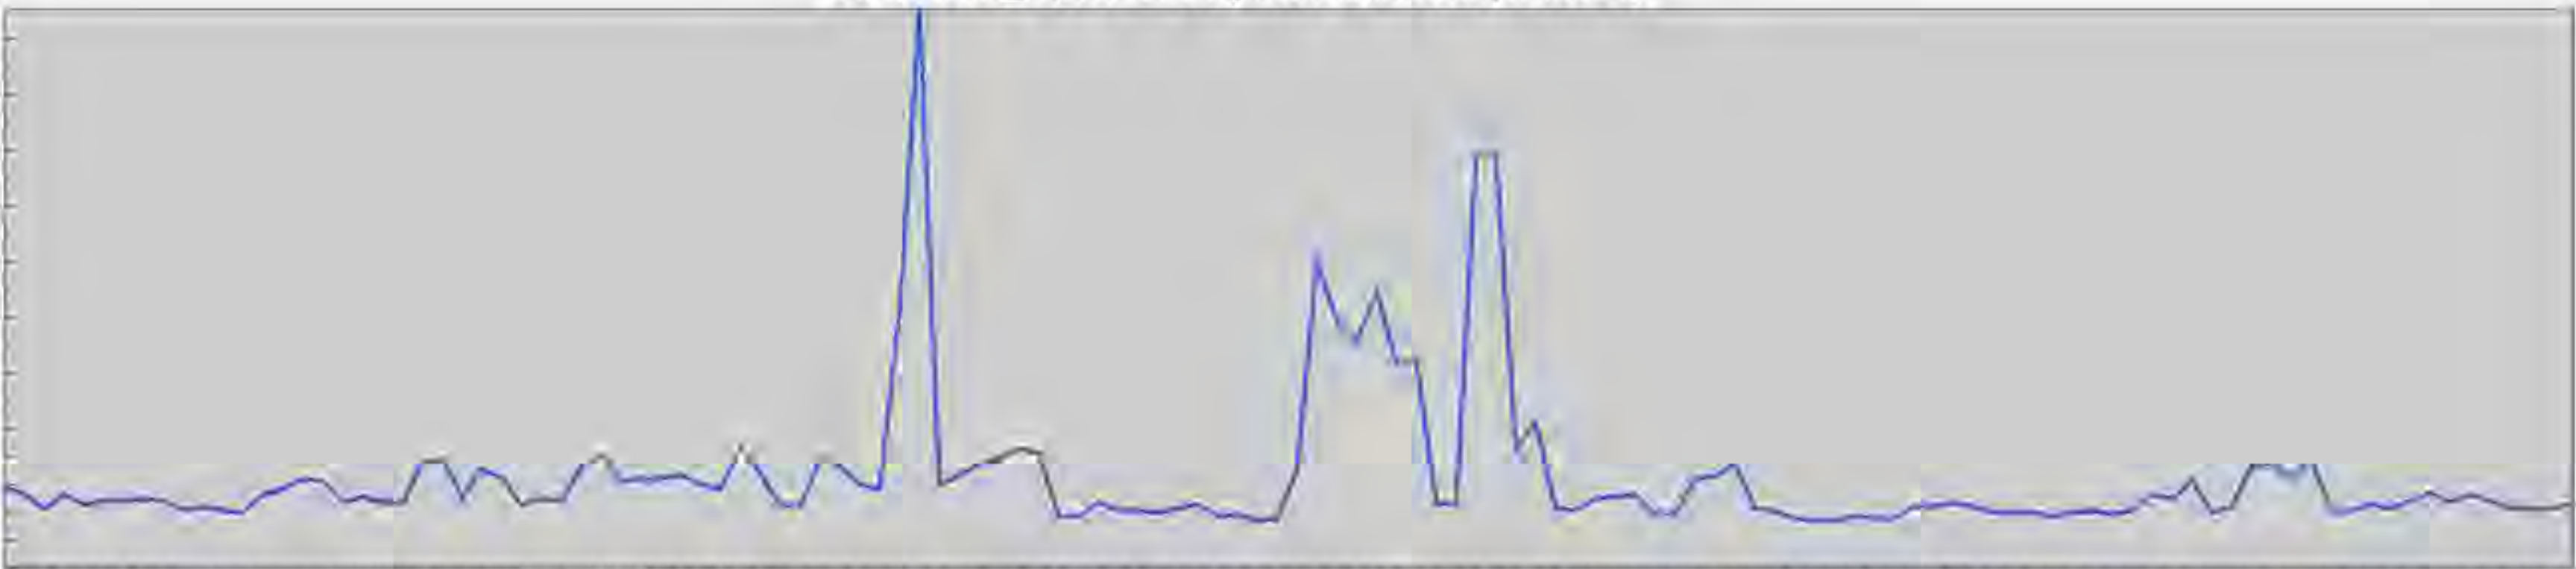

130-NALT GSM289411.CEL  
129-NALT GSM289410.CEL  
128-NALT GSM289409.CEL  
127-NALT GSM289408.CEL  
126-Colon-d9 GSM1988105.CEL  
125-Colon-d9 GSM1988104.CEL  
124-Colon-d9 GSM1988103.CEL  
123-Colon-d4 GSM1988102.CEL  
122-Colon-d4 GSM1988101.CEL  
121-Intestine-large GSM258676.CEL  
120-Intestine-large GSM258675.CEL  
119-Intestine-small GSM258678.CEL  
118-Intestine-small GSM258692.CEL  
117-Lymph-nodes GSM258691.CEL  
116-Lymph-nodes GSM258768.CEL  
115-Spleen GSM258767.CEL  
114-Spleen GSM258766.CEL  
113-Neuro2a GSM258728.CEL  
112-Neuro2a GSM258727.CEL  
111-Astrocytes GSM241898.CEL  
110-mim6 GSM258726.CEL  
109-mim6 GSM258725.CEL  
108-MIMCD3 GSM258724.CEL  
107-MIMCD3 GSM258723.CEL  
106-Bruce4 GSM258665.CEL  
105-Bruce4 GSM258666.CEL  
104-C2C12 GSM258690.CEL  
103-C2C12 GSM258689.CEL  
102-NH3T3 GSM258730.CEL  
101-NH3T3 GSM258729.CEL  
100-3T3-L1 GSM258610.CEL  
99-3T3-L1 GSM258609.CEL  
98-10T12 GSM258632.CEL  
97-10T12 GSM258631.CEL  
96-Osteoblast-d21 GSM258740.CEL  
95-Osteoblast-d21 GSM258739.CEL  
94-Osteoblast-d14 GSM258738.CEL  
93-Osteoblast-d14 GSM258737.CEL  
92-Osteoblast-d5 GSM258742.CEL  
91-Osteoblast-d5 GSM258741.CEL  
90-Chondrocytes GSM266741.CEL  
89-Chondrocytes GSM266740.CEL  
88-Nat Helper cell GSM465594.CEL  
87-Nat Helper cell GSM465593.CEL  
86-Tt cell GSM465596.CEL  
85-MS-1 GSM234692.CEL  
84-Lymph-endg-cells GSM143704.CEL  
83-P-FDC GSM481977.CEL  
82-P-FDC GSM481978.CEL  
81-P-FDC GSM481976.CEL  
80-F-LY RMLNDC003001.CEL  
79-F-LY RMLNDC003001.CEL  
78-Follicular-B-cells GSM258664.CEL  
77-Follicular-B-cells GSM258665.CEL  
76-MZ-Bcell GSM258627.CEL  
75-MZ-Bcell GSM258621.CEL  
74-BAF3 GSM258620.CEL  
73-BAF3 GSM258619.CEL  
72-Tregs GSM258778.CEL  
71-Tregs GSM258777.CEL  
70-T-cells-CD8+ GSM258776.CEL  
69-T-cells-CD8+ GSM258775.CEL  
68-T-cells-CD4+ GSM258774.CEL  
67-T-cells-CD4+ GSM258773.CEL  
66-Thymocyte-DN GSM465595.CEL  
65-Osteoclasts GSM258744.CEL  
64-Osteoclasts GSM258743.CEL  
63-Microglia GSM258721.CEL  
62-Microglia GSM258721.CEL  
61-P-MM-LPS-7h GSM258706.CEL  
60-P-MM-LPS-7h GSM258705.CEL  
59-P-MM-LPS-6h GSM258702.CEL  
58-P-MM-LPS-6h GSM258701.CEL  
57-BMM-LPS-6h GSM258699.CEL  
56-BMM-LPS-6h GSM258699.CEL  
55-BMM-LPS-6h GSM258699.CEL  
54-BMM-LPS-6h GSM258699.CEL  
53-Iasmacryoid-DC GSM258650.CEL  
52-Iasmacryoid-DC GSM258649.CEL  
51-CD8a-DC GSM258648.CEL  
50-CD8a-DC GSM258647.CEL  
49-CD8a+DC GSM258646.CEL  
48-CD8a+DC GSM258646.CEL  
47-NK-cells GSM258732.CEL  
46-NK-cells GSM258731.CEL  
45-Mast-cells-IgE+Ad GSM258718.CEL  
44-Mast-cells-IgE+Ad GSM258717.CEL  
43-Mast-cells-IgE GSM258714.CEL  
42-Mast-cells-IgE GSM258713.CEL  
41-Mast-cells GSM258712.CEL  
40-Granulocytes GSM258668.CEL  
39-Granulocytes GSM258667.CEL  
38-GMP GSM258666.CEL  
37-GMP GSM258666.CEL  
36-GMP GSM258666.CEL  
35-CMP GSM258642.CEL  
34-CMP GSM258641.CEL  
33-MEP GSM258720.CEL  
32-MEP GSM258719.CEL  
31-HSC GSM258770.CEL  
30-HSC GSM258769.CEL  
29-Bone marrow GSM258628.CEL  
28-Bone marrow GSM258627.CEL  
27-paneth-cells-GE GSM116357.CEL  
26-paneth-cells-GE GSM116350.CEL  
25-paneth-cells GSM116350.CEL  
24-paneth-cells GSM116359.CEL  
23-paneth-cells GSM318589.CEL  
22-paneth-cells GSM318590.CEL  
21-Colon-Crypt GSM480375.CEL  
20-Colon-Crypt GSM480374.CEL  
19-Colon-Vill GSM480363.CEL  
18-Colon-Vill GSM480362.CEL  
17-Colon-IEC-GE GSM349880.CEL  
16-Colon-IEC-GE GSM350375.CEL  
15-Ileum-IEC-TGF GSM350376.CEL  
14-Ileum-IEC GSM350371.CEL  
13-Small-intestine-epithelium RMINEP002001.CEL  
12-Small-intestine-epithelium RMINEP001001.CEL  
11-FAE-RMPYEP002001.CEL  
10-FAE-RMPYEP001001.CEL  
09-Ileum-IEC GSM190797.CEL  
08-Ileum-IEC GSM190796.CEL  
07-Ileum-IEC GSM190795.CEL  
06-CT-v-M-cells GSM190794.CEL  
05-CT-v-M-cells GSM190793.CEL  
04-PP-M-cells GSM190792.CEL  
03-PP-M-cells GSM190791.CEL  
02-PP-M-cells GSM190790.CEL  
01-PP-M-cells GSM190789.CEL



Cluster0185\_Phagocyte-related (10 nodes)

4,794.5  
4,542.2  
4,289.8  
4,037.5  
3,785.1  
3,532.8  
3,280.4  
3,028.1  
2,775.8  
2,523.4  
2,271.1  
2,018.7  
1,766.4  
1,514.1  
1,261.7  
1,009.4  
757  
504.7  
252.3  
0

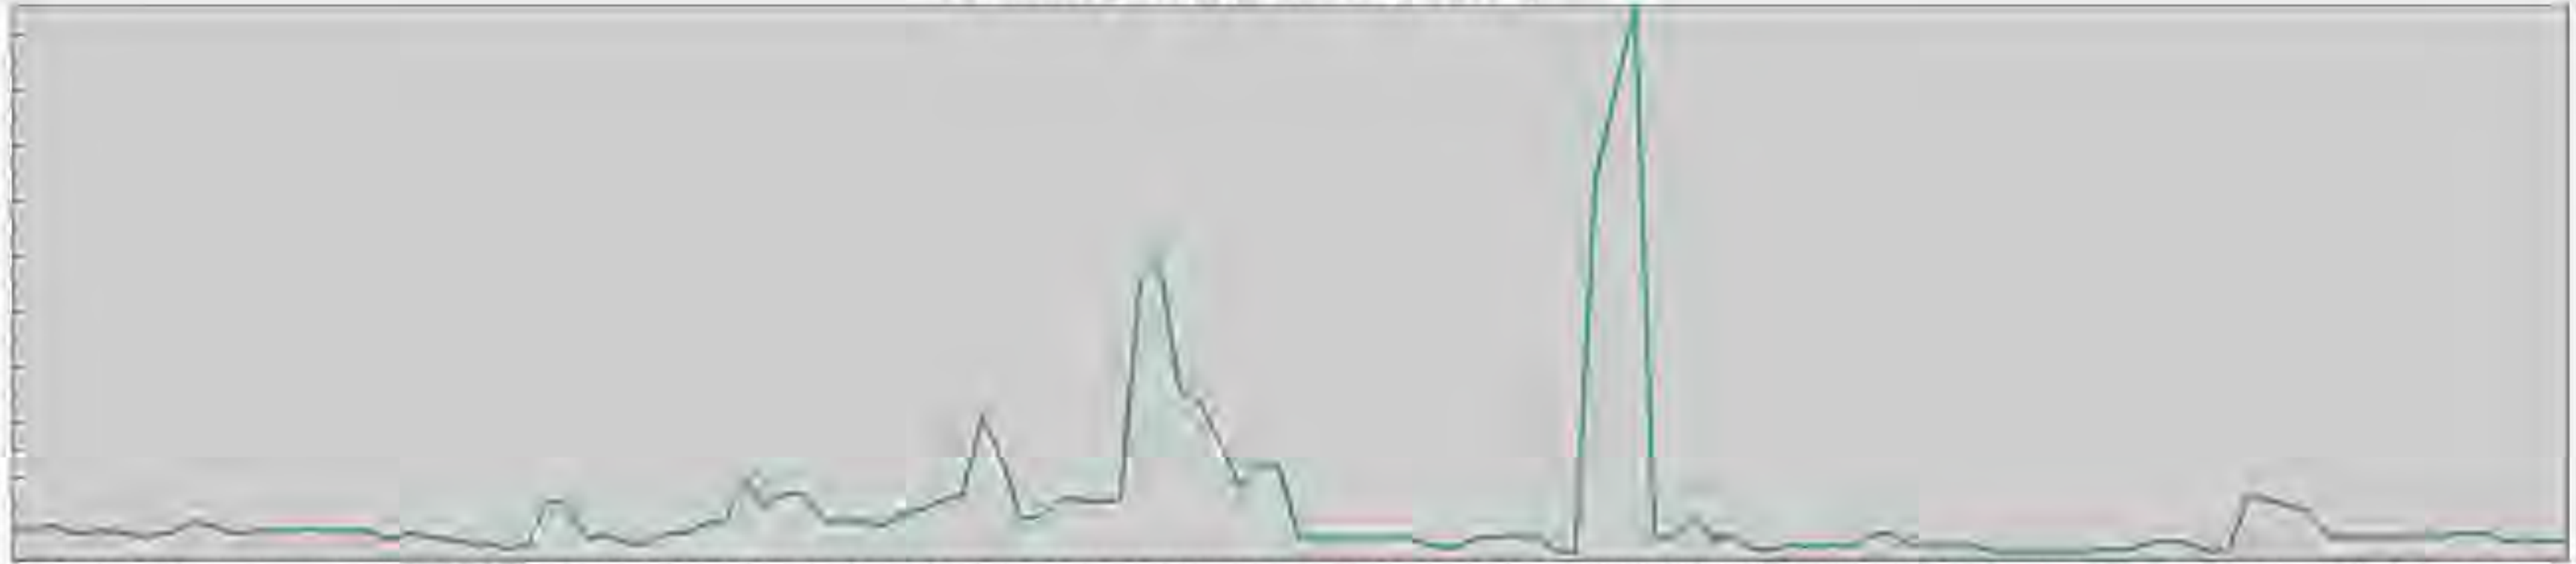

130-NALT GSM289411 CELL  
129-NALT GSM289410 CELL  
128-NALT GSM289409 CELL  
127-NALT GSM289408 CELL  
126-Color-d9 GSM1988105 CELL  
125-Color-d9 GSM1988104 CELL  
124-Color-d9 GSM1988103 CELL  
123-Color-d4 GSM1988102 CELL  
122-Color-d4 GSM1988101 CELL  
121-Intestine-large GSM258676 CELL  
120-Intestine-large GSM258675 CELL  
119-Intestine-small GSM258678 CELL  
118-Intestine-small GSM258679 CELL  
117-Lymph-nodes GSM258691 CELL  
116-Lymph-nodes GSM258726 CELL  
115-Spleen GSM258767 CELL  
114-Spleen GSM258767 CELL  
113-Neuro2a GSM258728 CELL  
112-Neuro2a GSM258728 CELL  
111-Astrocytes GSM241898 CELL  
110-mimb GSM258726 CELL  
109-mimb GSM258725 CELL  
108-MIMCD3 GSM258724 CELL  
107-MIMCD3 GSM258723 CELL  
106-Bruce4 GSM258656 CELL  
105-Bruce4 GSM258656 CELL  
104-C2C12 GSM258690 CELL  
103-C2C12 GSM258629 CELL  
102-NH3T3 GSM258739 CELL  
101-NH3T3 GSM258739 CELL  
100-3T3-L1 GSM258610 CELL  
99-3T3-L1 GSM258609 CELL  
98-10T12 GSM258632 CELL  
97-10T12 GSM258631 CELL  
96-Osteoblast-d21 GSM258740 CELL  
95-Osteoblast-d21 GSM258739 CELL  
94-Osteoblast-d14 GSM258738 CELL  
93-Osteoblast-d14 GSM258737 CELL  
92-Osteoblast-d5 GSM258742 CELL  
91-Osteoblast-d5 GSM258741 CELL  
90-Chondrocytes GSM266741 CELL  
89-Chondrocytes GSM266740 CELL  
88-Nat Helper cell GSM465594 CELL  
87-Nat Helper cell GSM465593 CELL  
86-T cell GSM465596 CELL  
85-MS-1 GSM234692 CELL  
84-Lymph-endo-cells GSM143704 CELL  
83-P-FDC GSM481977 CELL  
82-P-FDC GSM481978 CELL  
81-P-FDC GSM481976 CELL  
80-L-Y RMLNDCC003001 CELL  
79-L-Y RMLNDCC003001 CELL  
78-Follicular-Bcells GSM258664 CELL  
77-Follicular-Bcells GSM258663 CELL  
76-MZ-Bcell GSM258627 CELL  
75-MZ-Bcell GSM258627 CELL  
74-BAF3 GSM258620 CELL  
73-BAF3 GSM258619 CELL  
72-Tregs GSM258778 CELL  
71-Tregs GSM258777 CELL  
70-T-cells-CD8+ GSM258776 CELL  
69-T-cells-CD8+ GSM258774 CELL  
68-T-cells-CD4+ GSM258773 CELL  
67-T-cells-CD4+ GSM258773 CELL  
66-Thymocyte-DN GSM465595 CELL  
65-Osteoclasts GSM258743 CELL  
64-Osteoclasts GSM258743 CELL  
63-Microglia GSM258721 CELL  
62-Microglia GSM258721 CELL  
61-MM-LPS-7h GSM258706 CELL  
60-MM-LPS-7h GSM258706 CELL  
59-MM-LPS-6h GSM258702 CELL  
58-MM-LPS-6h GSM258702 CELL  
57-MM-LPS-6h GSM258700 CELL  
56-MM-LPS-6h GSM258699 CELL  
55-MM-LPS-6h GSM258699 CELL  
54-MM-LPS-6h GSM258694 CELL  
53-Ismacryoid-DC GSM258650 CELL  
52-Ismacryoid-DC GSM258649 CELL  
51-CD8a-DC GSM258648 CELL  
50-CD8a-DC GSM258647 CELL  
49-CD8a+DC GSM258646 CELL  
48-CD8a+DC GSM258646 CELL  
47-NK-cells GSM258732 CELL  
46-NK-cells GSM258732 CELL  
45-Mast-cells-IgE+Ad GSM258719 CELL  
44-Mast-cells-IgE+Ad GSM258719 CELL  
43-Mast-cells-IgE GSM258714 CELL  
42-Mast-cells-IgE GSM258713 CELL  
41-Mast-cells GSM258712 CELL  
40-Granulocytes GSM258667 CELL  
39-Granulocytes GSM258667 CELL  
38-GMP GSM258666 CELL  
37-GMP GSM258666 CELL  
36-GMP GSM258665 CELL  
35-GMP GSM258664 CELL  
34-MPEP GSM258872 CELL  
33-MPEP GSM258872 CELL  
32-MPEP GSM258872 CELL  
31-HESC GSM258770 CELL  
30-HESC GSM258770 CELL  
29-Bone marrow GSM258628 CELL  
28-Bone marrow GSM258627 CELL  
27-paneth-cells-GF-1 GSM116358 CELL  
26-paneth-cells-GF-1 GSM116357 CELL  
25-paneth-cells GSM116350 CELL  
24-paneth-cells GSM116359 CELL  
23-paneth-cells GSM318589 CELL  
22-paneth-cells GSM318590 CELL  
21-Color-Crypt GSM480375 cel  
20-Color-Crypt GSM480374 cel  
19-Color-Vill GSM480363 cel  
18-Color-Vill GSM480362 cel  
17-Color-IEC-GF GSM349880 CELL  
16-Color-IEC-GF GSM350375 CELL  
15-Ileum-IEC-GF GSM350376 CELL  
14-Ileum-IEC GSM350371 CELL  
13-Small-intestine-epithelium RMINEP002901 CELL  
12-Small-intestine-epithelium RMINEP001001 CELL  
11-FAE-RMPYEP002001 CELL  
10-FAE-RMPYEP001001 CELL  
09-Ileum-IEC GSM190797 CELL  
08-Ileum-IEC GSM190796 CELL  
07-Ileum-IEC GSM190795 CELL  
06-CT-v-M-cells GSM190794 CELL  
05-CT-v-M-cells GSM190793 CELL  
04-CT-v-M-cells GSM190792 CELL  
03-PP-M-cells GSM190791 CELL  
02-PP-M-cells GSM190790 CELL  
01-PP-M-cells GSM190789 CELL



Cluster0186\_High in classical DC and plasmacytoid DC (10 nodes)

669.7  
634.5  
599.2  
564  
528.7  
493.5  
458.2  
423  
387.7  
352.5  
317.2  
282  
246.7  
211.5  
178.2  
141  
105.7  
70.5  
35.2  
0

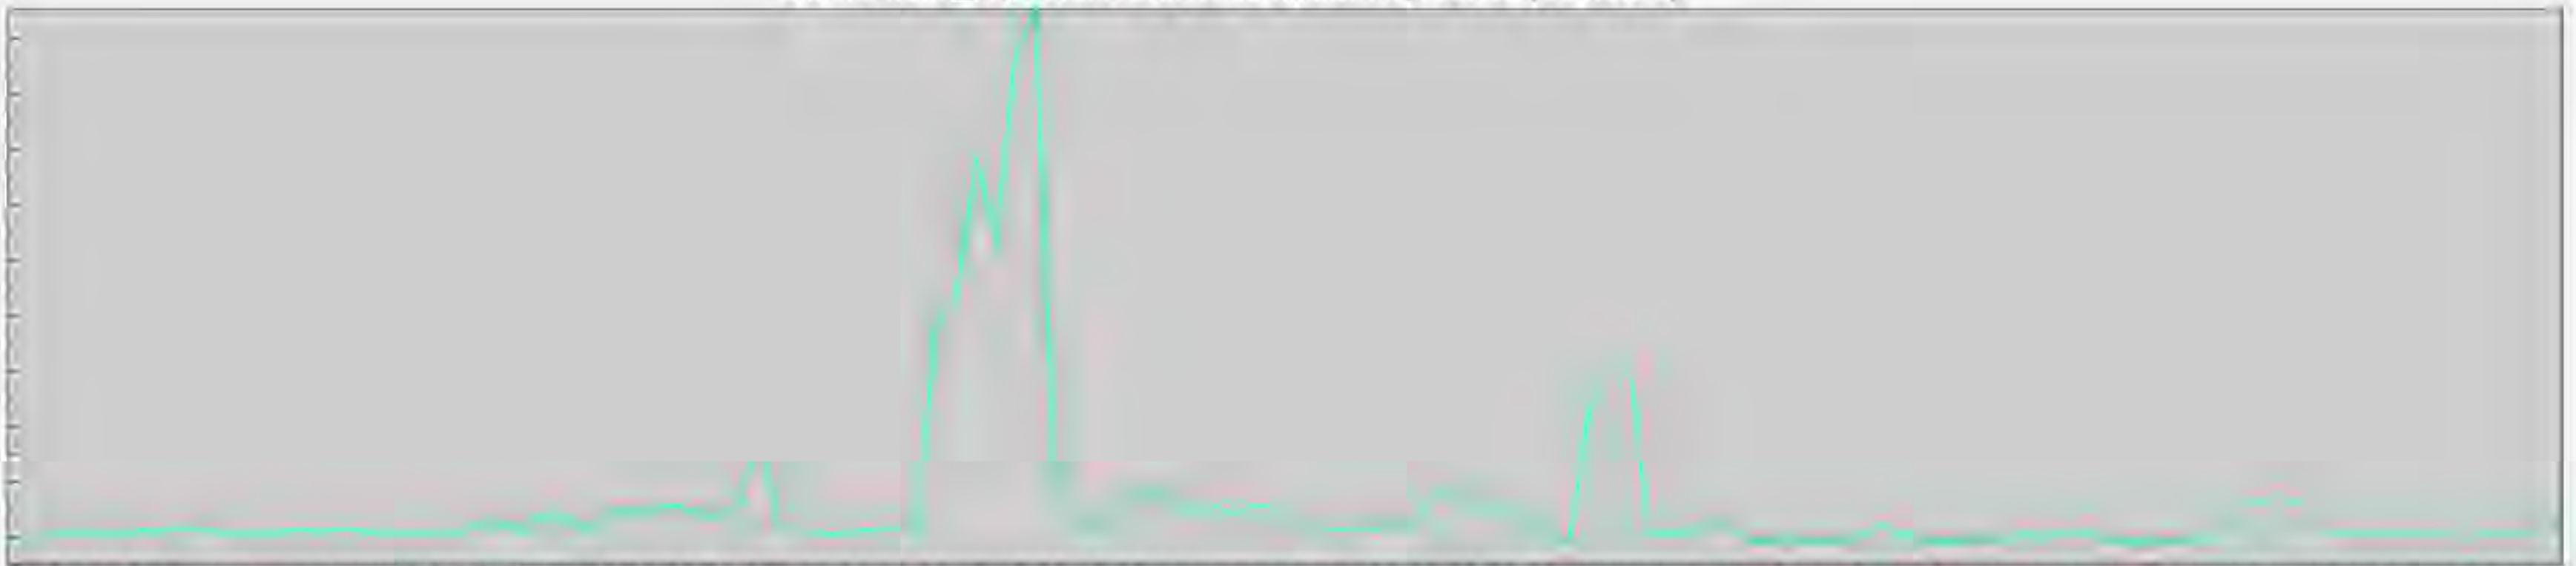

130-NALT GSM289411 CEL  
129-NALT GSM289410 CEL  
128-NALT GSM289409 CEL  
127-NALT GSM289408 CEL  
126-Colon-d9 GSM1988105 CEL  
125-Colon-d9 GSM1988104 CEL  
124-Colon-d9 GSM1988103 CEL  
123-Colon-d4 GSM1988102 CEL  
122-Colon-d4 GSM1988101 CEL  
121-Intestine-large GSM258676 CEL  
120-Intestine-large GSM258675 CEL  
119-Intestine-small GSM258678 CEL  
118-Intestine-small GSM258679 CEL  
117-Lymph-nodes GSM258691 CEL  
116-Lymph-nodes GSM258692 CEL  
115-Spleen GSM258767 CEL  
114-Spleen GSM258767 CEL  
113-Neuro2a GSM258728 CEL  
112-Neuro2a GSM258728 CEL  
111-Astrocytes GSM241898 CEL  
110-mimb GSM258726 CEL  
109-mimb GSM258725 CEL  
108-MIMCD3 GSM258724 CEL  
107-MIMCD3 GSM258723 CEL  
106-Bruce4 GSM258695 CEL  
105-Bruce4 GSM258695 CEL  
104-C2C12 GSM258690 CEL  
103-C2C12 GSM258689 CEL  
102-NH3T3 GSM258730 CEL  
101-NH3T3 GSM258729 CEL  
100-3T3-L1 GSM258610 CEL  
99-3T3-L1 GSM258609 CEL  
98-10T12 GSM258692 CEL  
97-10T12 GSM258691 CEL  
96-Osteoblast-d21 GSM258740 CEL  
95-Osteoblast-d21 GSM258739 CEL  
94-Osteoblast-d14 GSM258738 CEL  
93-Osteoblast-d14 GSM258737 CEL  
92-Osteoblast-d5 GSM258742 CEL  
91-Osteoblast-d5 GSM258741 CEL  
90-Chondrocytes GSM266741 CEL  
89-Chondrocytes GSM266740 CEL  
88-Nat Helper cell GSM465594 CEL  
87-Nat Helper cell GSM465593 CEL  
86-TT cell GSM465596 CEL  
85-MS-1 GSM234692 CEL  
84-Lymph-endo-cells GSM143704 CEL  
83-PP-FDC GSM481977 CEL  
82-PP-FDC GSM481978 CEL  
81-PP-FDC GSM481976 CEL  
80-LY-RMLNDCC003001 CEL  
79-LY-RMLNDCC003001 CEL  
78-Follicular-Bcells GSM258664 CEL  
77-Follicular-Bcells GSM258663 CEL  
76-MZ-Bcell GSM258627 CEL  
75-MZ-Bcell GSM258627 CEL  
74-BAF3 GSM258620 CEL  
73-BAF3 GSM258619 CEL  
72-Tregs GSM258778 CEL  
71-Tregs GSM258777 CEL  
70-T-cells-CD8+ GSM258776 CEL  
69-T-cells-CD8+ GSM258774 CEL  
68-T-cells-CD4+ GSM258773 CEL  
67-T-cells-CD4+ GSM258773 CEL  
66-Thymocyte-DN GSM465595 CEL  
65-Osteoclasts GSM258743 CEL  
64-Osteoclasts GSM258743 CEL  
63-Microglia GSM258721 CEL  
62-Microglia GSM258721 CEL  
61-MM-LPS-7h GSM258706 CEL  
60-MM-LPS-7h GSM258706 CEL  
59-MM-LPS-6h GSM258702 CEL  
58-MM-LPS-6h GSM258702 CEL  
57-MM-LPS-6h GSM258699 CEL  
56-MM-LPS-6h GSM258699 CEL  
55-MM-LPS-6h GSM258694 CEL  
54-MM-LPS-6h GSM258694 CEL  
53-Plasmacytoid-DC GSM258650 CEL  
52-Plasmacytoid-DC GSM258649 CEL  
51-CD8a-DC GSM258647 CEL  
50-CD8a-DC GSM258647 CEL  
49-CD8a+DC GSM258646 CEL  
48-CD8a+DC GSM258646 CEL  
47-NK-cells GSM258732 CEL  
46-NK-cells GSM258732 CEL  
45-Mast-cells-IgE+Ad GSM258719 CEL  
44-Mast-cells-IgE+Ad GSM258719 CEL  
43-Mast-cells-IgE GSM258714 CEL  
42-Mast-cells-IgE GSM258714 CEL  
41-Mast-cells GSM258712 CEL  
40-Granulocytes GSM258667 CEL  
39-Granulocytes GSM258667 CEL  
38-GMP GSM258666 CEL  
37-GMP GSM258666 CEL  
36-GMP GSM258665 CEL  
35-GMP GSM258665 CEL  
34-MPEP GSM258642 CEL  
33-MPEP GSM258642 CEL  
32-MPEP GSM258720 CEL  
31-MPEP GSM258720 CEL  
30-HESC GSM258770 CEL  
29-Bone marrow GSM258628 CEL  
28-Bone marrow GSM258627 CEL  
27-paneth-cells-GE GSM116358 CEL  
26-paneth-cells-GE GSM116357 CEL  
25-paneth-cells GSM116350 CEL  
24-paneth-cells GSM116359 CEL  
23-paneth-cells GSM318589 CEL  
22-paneth-cells GSM318590 CEL  
21-Colon-Crypt GSM480375 cel  
20-Colon-Crypt GSM480374 cel  
19-Colon-Vill GSM480363 cel  
18-Colon-Vill GSM480362 cel  
17-Colon-IEC-GE GSM349880 CEL  
16-Colon-IEC-GE GSM350375 CEL  
15-Ileum-IEC-TGF GSM350376 CEL  
14-Ileum-IEC GSM350371 CEL  
13-Small-intestine-epithelium RMINEP002001 CEL  
12-Small-intestine-epithelium RMINEP001001 CEL  
11-FAE-RMPYEP002001 CEL  
10-FAE-RMPYEP001001 CEL  
09-Ileum-IEC GSM190797 CEL  
08-Ileum-IEC GSM190796 CEL  
07-Ileum-IEC GSM190795 CEL  
06-CT-v-M-cells GSM190794 CEL  
05-CT-v-M-cells GSM190793 CEL  
04-PP-M-cells GSM190792 CEL  
03-PP-M-cells GSM190791 CEL  
02-PP-M-cells GSM190790 CEL  
01-PP-M-cells GSM190789 CEL



Cluster0187\_Intestine-related (10 nodes)

1,575.8  
1,492.9  
1,409.9  
1,327  
1,244  
1,161.1  
1,078.2  
995.2  
912.3  
829.4  
746.4  
663.5  
580.6  
497.6  
414.7  
331.7  
248.8  
165.9  
82.9  
0

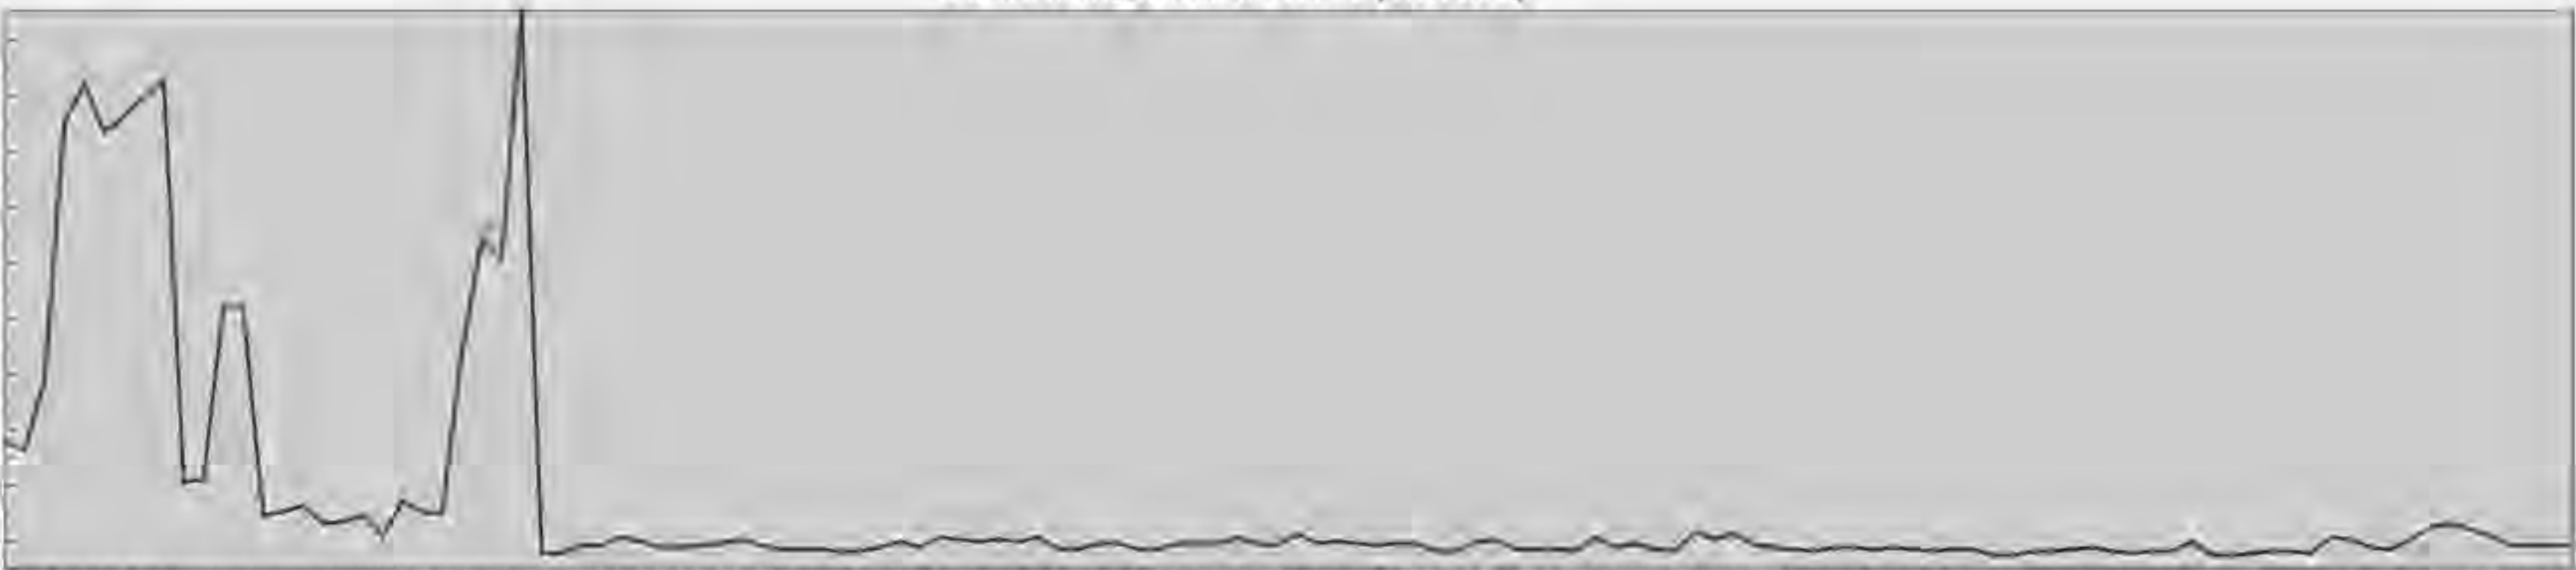

|                                            |      |
|--------------------------------------------|------|
| 01-PP-M-cells_GSM190789                    | CEL  |
| 02-PP-M-cells_GSM190790                    | CEL  |
| 03-PP-M-cells_GSM190791                    | CEL  |
| 04-CT-Y-M-cells_GSM190792                  | CEL  |
| 05-CT-Y-M-cells_GSM190793                  | CEL  |
| 06-CT-W-M-cells_GSM190794                  | CEL  |
| 07-Ileum-IEC_GSM190795                     | CEL  |
| 08-Ileum-IEC_GSM190796                     | CEL  |
| 09-Ileum-IEC_GSM190797                     | CEL  |
| 10-FAE-RMPYEP001001                        | CEL  |
| 11-FAE-RMPYEP002001                        | CEL  |
| 12-Small-intestine-epithelium_RMINEP001001 | CEL  |
| 13-Small-intestine-epithelium_RMINEP002001 | CEL  |
| 14-Ileum-IEC_GSM350371                     | CEL  |
| 15-Ileum-IEC_GSM350375                     | CEL  |
| 16-Colon-VIII_GSM480362                    | cel  |
| 17-Colon-VIII_GSM480363                    | cel  |
| 18-Colon-VIII_GSM480364                    | cel  |
| 19-Colon-VIII_GSM480365                    | cel  |
| 20-Colon-Crypt_GSM480374                   | cel  |
| 21-Colon-Crypt_GSM480375                   | cel  |
| 22-Paneth-cells_GSM318590                  | CEL  |
| 23-Paneth-cells_GSM318591                  | CEL  |
| 24-Paneth-cells_GSM116350                  | CEL  |
| 25-Paneth-cells_GSM116359                  | CEL  |
| 26-Paneth-cells_GSM116357                  | CEL  |
| 27-Paneth-cells-GE-1-GSM116357             | CEL  |
| 28-Bone marrow_GSM258627                   | CEL  |
| 29-Bone marrow_GSM258628                   | CEL  |
| 30-NALT_GSM289411                          | CELL |
| 31-NALT_GSM289410                          | CELL |
| 32-NALT_GSM289409                          | CELL |
| 33-NALT_GSM289408                          | CELL |
| 34-Color-d9_GSM198810                      | CELL |
| 35-Color-d9_GSM198810                      | CELL |
| 36-Color-d9_GSM198810                      | CELL |
| 37-Color-d9_GSM198810                      | CELL |
| 38-Color-d4_GSM198810                      | CELL |
| 39-Color-d4_GSM198810                      | CELL |
| 40-Color-d4_GSM198810                      | CELL |
| 41-Intestine-large_GSM258676               | CEL  |
| 42-Intestine-large_GSM258675               | CEL  |
| 43-Intestine-small_GSM258677               | CEL  |
| 44-Intestine-small_GSM258678               | CEL  |
| 45-Spleen_GSM258707                        | CEL  |
| 46-Spleen_GSM258708                        | CEL  |
| 47-Neuro2a_GSM241898                       | CEL  |
| 48-Neuro2a_GSM241898                       | CEL  |
| 49-Astrocytes_GSM241898                    | CEL  |
| 50-ming_GSM258726                          | CEL  |
| 51-ming_GSM258725                          | CEL  |
| 52-mim6_GSM258724                          | CEL  |
| 53-MIMCD3_GSM258723                        | CEL  |
| 54-MIMCD3_GSM258723                        | CEL  |
| 55-Bruce4_GSM258690                        | CEL  |
| 56-Bruce4_GSM258690                        | CEL  |
| 57-C2C12_GSM258729                         | CEL  |
| 58-NH3T3_GSM258730                         | CEL  |
| 59-NH3T3_GSM258729                         | CEL  |
| 60-3T3-L1_GSM258610                        | CEL  |
| 61-3T3-L1_GSM258609                        | CEL  |
| 62-10T12_GSM258632                         | CEL  |
| 63-10T12_GSM258631                         | CEL  |
| 64-Osteoblast-d21_GSM258740                | CEL  |
| 65-Osteoblast-d21_GSM258739                | CEL  |
| 66-Osteoblast-d14_GSM258738                | CEL  |
| 67-Osteoblast-d14_GSM258737                | CEL  |
| 68-Osteoblast-d5_GSM258742                 | CEL  |
| 69-Osteoblast-d5_GSM258741                 | CEL  |
| 70-Chondrocytes_GSM258674                  | CEL  |
| 71-Chondrocytes_GSM258674                  | CEL  |
| 72-Nat Helper cell_GSM465594               | CEL  |
| 73-Nat Helper cell_GSM465593               | CEL  |
| 74-LT cell_GSM465596                       | CEL  |
| 75-MS-1_GSM234692                          | CEL  |
| 76-Lymph-endo-cells_GSM143704              | CEL  |
| 77-Lymph-endo-cells_GSM481977              | CEL  |
| 78-Lymph-endo-cells_GSM481978              | CEL  |
| 79-Lymph-endo-cells_GSM481979              | CEL  |
| 80-Lymph-endo-cells_GSM481979              | CEL  |
| 81-Lymph-endo-cells_GSM481979              | CEL  |
| 82-Lymph-endo-cells_GSM481979              | CEL  |
| 83-Lymph-endo-cells_GSM481979              | CEL  |
| 84-Lymph-endo-cells_GSM481979              | CEL  |
| 85-Lymph-endo-cells_GSM481979              | CEL  |
| 86-Lymph-endo-cells_GSM481979              | CEL  |
| 87-Follicular-B-cells_GSM258622            | CEL  |
| 88-Follicular-B-cells_GSM258621            | CEL  |
| 89-Follicular-B-cells_GSM258621            | CEL  |
| 90-Follicular-B-cells_GSM258621            | CEL  |
| 91-Follicular-B-cells_GSM258621            | CEL  |
| 92-Follicular-B-cells_GSM258621            | CEL  |
| 93-Follicular-B-cells_GSM258621            | CEL  |
| 94-Follicular-B-cells_GSM258621            | CEL  |
| 95-Follicular-B-cells_GSM258621            | CEL  |
| 96-Follicular-B-cells_GSM258621            | CEL  |
| 97-Follicular-B-cells_GSM258621            | CEL  |
| 98-Follicular-B-cells_GSM258621            | CEL  |
| 99-Follicular-B-cells_GSM258621            | CEL  |
| 100-Follicular-B-cells_GSM258621           | CEL  |
| 101-Follicular-B-cells_GSM258621           | CEL  |
| 102-Follicular-B-cells_GSM258621           | CEL  |
| 103-Follicular-B-cells_GSM258621           | CEL  |
| 104-Follicular-B-cells_GSM258621           | CEL  |
| 105-Follicular-B-cells_GSM258621           | CEL  |
| 106-Follicular-B-cells_GSM258621           | CEL  |
| 107-Follicular-B-cells_GSM258621           | CEL  |
| 108-Follicular-B-cells_GSM258621           | CEL  |
| 109-Follicular-B-cells_GSM258621           | CEL  |
| 110-Follicular-B-cells_GSM258621           | CEL  |
| 111-Follicular-B-cells_GSM258621           | CEL  |
| 112-Follicular-B-cells_GSM258621           | CEL  |
| 113-Follicular-B-cells_GSM258621           | CEL  |
| 114-Follicular-B-cells_GSM258621           | CEL  |
| 115-Follicular-B-cells_GSM258621           | CEL  |
| 116-Follicular-B-cells_GSM258621           | CEL  |
| 117-Follicular-B-cells_GSM258621           | CEL  |
| 118-Follicular-B-cells_GSM258621           | CEL  |
| 119-Follicular-B-cells_GSM258621           | CEL  |
| 120-Follicular-B-cells_GSM258621           | CEL  |
| 121-Follicular-B-cells_GSM258621           | CEL  |
| 122-Follicular-B-cells_GSM258621           | CEL  |
| 123-Follicular-B-cells_GSM258621           | CEL  |
| 124-Follicular-B-cells_GSM258621           | CEL  |
| 125-Follicular-B-cells_GSM258621           | CEL  |
| 126-Follicular-B-cells_GSM258621           | CEL  |
| 127-Follicular-B-cells_GSM258621           | CEL  |
| 128-Follicular-B-cells_GSM258621           | CEL  |
| 129-Follicular-B-cells_GSM258621           | CEL  |
| 130-Follicular-B-cells_GSM258621           | CEL  |
| 131-Follicular-B-cells_GSM258621           | CEL  |
| 132-Follicular-B-cells_GSM258621           | CEL  |
| 133-Follicular-B-cells_GSM258621           | CEL  |
| 134-Follicular-B-cells_GSM258621           | CEL  |
| 135-Follicular-B-cells_GSM258621           | CEL  |
| 136-Follicular-B-cells_GSM258621           | CEL  |
| 137-Follicular-B-cells_GSM258621           | CEL  |
| 138-Follicular-B-cells_GSM258621           | CEL  |
| 139-Follicular-B-cells_GSM258621           | CEL  |
| 140-Follicular-B-cells_GSM258621           | CEL  |
| 141-Follicular-B-cells_GSM258621           | CEL  |
| 142-Follicular-B-cells_GSM258621           | CEL  |
| 143-Follicular-B-cells_GSM258621           | CEL  |
| 144-Follicular-B-cells_GSM258621           | CEL  |
| 145-Follicular-B-cells_GSM258621           | CEL  |
| 146-Follicular-B-cells_GSM258621           | CEL  |
| 147-Follicular-B-cells_GSM258621           | CEL  |
| 148-Follicular-B-cells_GSM258621           | CEL  |
| 149-Follicular-B-cells_GSM258621           | CEL  |
| 150-Follicular-B-cells_GSM258621           | CEL  |
| 151-Follicular-B-cells_GSM258621           | CEL  |
| 152-Follicular-B-cells_GSM258621           | CEL  |
| 153-Follicular-B-cells_GSM258621           | CEL  |
| 154-Follicular-B-cells_GSM258621           | CEL  |
| 155-Follicular-B-cells_GSM258621           | CEL  |
| 156-Follicular-B-cells_GSM258621           | CEL  |
| 157-Follicular-B-cells_GSM258621           | CEL  |
| 158-Follicular-B-cells_GSM258621           | CEL  |
| 159-Follicular-B-cells_GSM258621           | CEL  |
| 160-Follicular-B-cells_GSM258621           | CEL  |
| 161-Follicular-B-cells_GSM258621           | CEL  |
| 162-Follicular-B-cells_GSM258621           | CEL  |
| 163-Follicular-B-cells_GSM258621           | CEL  |
| 164-Follicular-B-cells_GSM258621           | CEL  |
| 165-Follicular-B-cells_GSM258621           | CEL  |
| 166-Follicular-B-cells_GSM258621           | CEL  |
| 167-Follicular-B-cells_GSM258621           | CEL  |
| 168-Follicular-B-cells_GSM258621           | CEL  |
| 169-Follicular-B-cells_GSM258621           | CEL  |
| 170-Follicular-B-cells_GSM258621           | CEL  |
| 171-Follicular-B-cells_GSM258621           | CEL  |
| 172-Follicular-B-cells_GSM258621           | CEL  |
| 173-Follicular-B-cells_GSM258621           | CEL  |
| 174-Follicular-B-cells_GSM258621           | CEL  |
| 175-Follicular-B-cells_GSM258621           | CEL  |
| 176-Follicular-B-cells_GSM258621           | CEL  |
| 177-Follicular-B-cells_GSM258621           | CEL  |
| 178-Follicular-B-cells_GSM258621           | CEL  |
| 179-Follicular-B-cells_GSM258621           | CEL  |
| 180-Follicular-B-cells_GSM258621           | CEL  |
| 181-Follicular-B-cells_GSM258621           | CEL  |
| 182-Follicular-B-cells_GSM258621           | CEL  |
| 183-Follicular-B-cells_GSM258621           | CEL  |
| 184-Follicular-B-cells_GSM258621           | CEL  |
| 185-Follicular-B-cells_GSM258621           | CEL  |
| 186-Follicular-B-cells_GSM258621           | CEL  |
| 187-Follicular-B-cells_GSM258621           | CEL  |
| 188-Follicular-B-cells_GSM258621           | CEL  |
| 189-Follicular-B-cells_GSM258621           | CEL  |
| 190-Follicular-B-cells_GSM258621           | CEL  |
| 191-Follicular-B-cells_GSM258621           | CEL  |
| 192-Follicular-B-cells_GSM258621           | CEL  |
| 193-Follicular-B-cells_GSM258621           | CEL  |
| 194-Follicular-B-cells_GSM258621           | CEL  |
| 195-Follicular-B-cells_GSM258621           | CEL  |
| 196-Follicular-B-cells_GSM258621           | CEL  |
| 197-Follicular-B-cells_GSM258621           | CEL  |
| 198-Follicular-B-cells_GSM258621           | CEL  |
| 199-Follicular-B-cells_GSM258621           | CEL  |
| 200-Follicular-B-cells_GSM258621           | CEL  |



Cluster0188\_House keeping (10 nodes)

286.4  
271.3  
256.2  
241.2  
226.1  
211  
195.9  
180.9  
165.8  
150.7  
135.6  
120.6  
105.5  
90.4  
75.4  
60.3  
45.2  
30.1  
15.1  
0

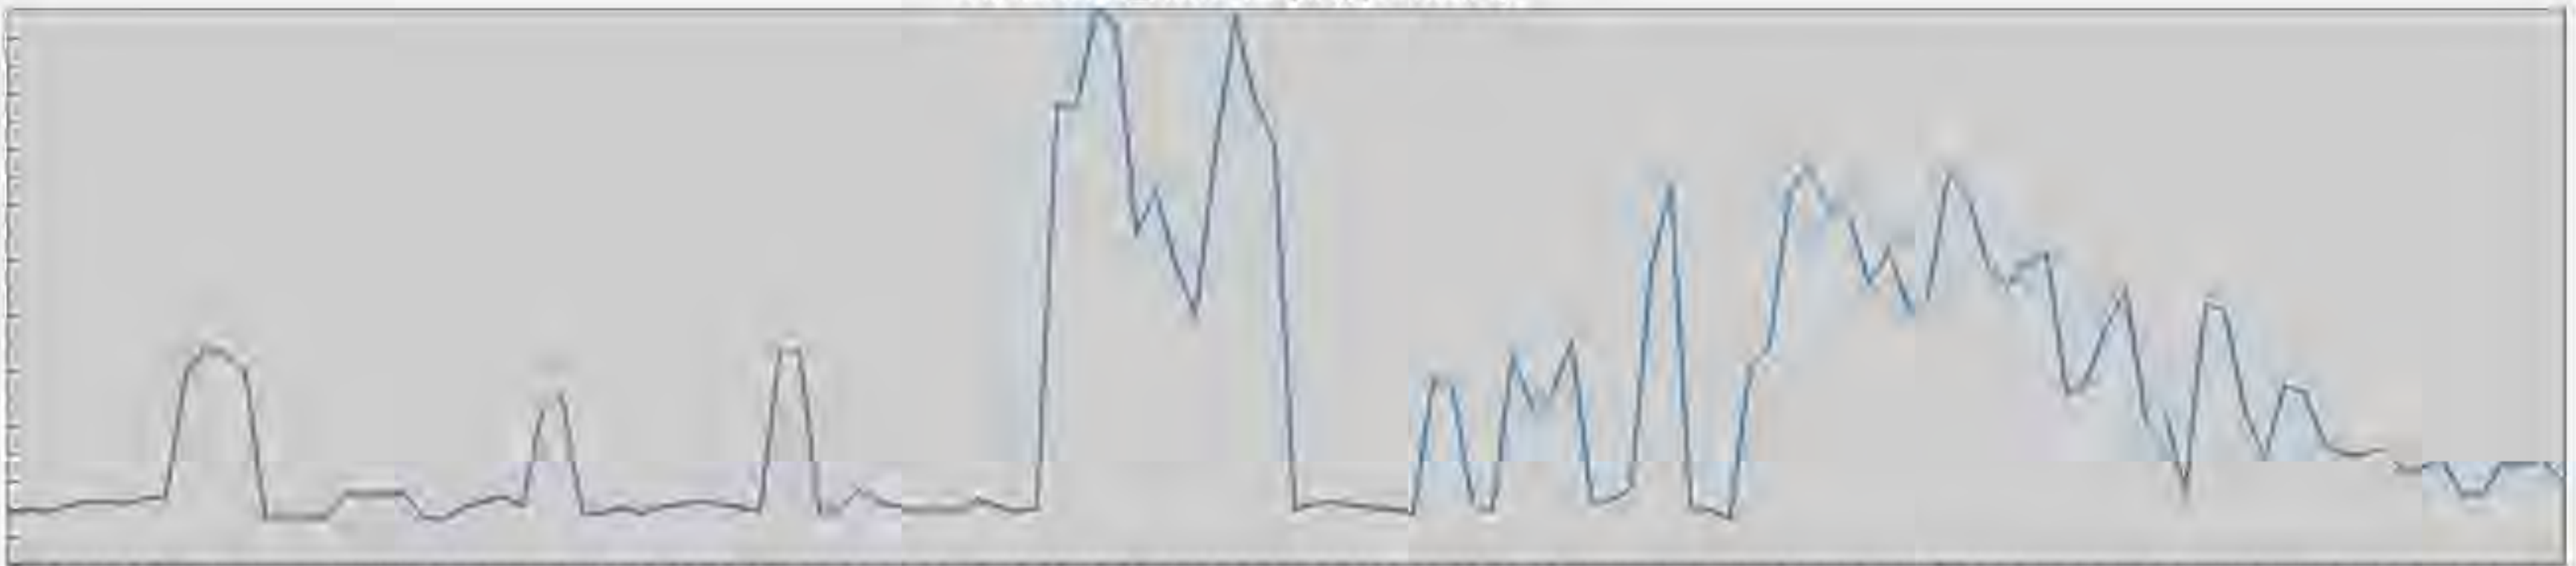

130-NALT GSM289411.CEL  
129-NALT GSM289410.CEL  
128-NALT GSM289409.CEL  
127-NALT GSM289408.CEL  
126-Column-d9 GSM1988105.CEL  
125-Column-d9 GSM1988104.CEL  
124-Column-d9 GSM1988103.CEL  
123-Column-d4 GSM1988102.CEL  
122-Column-d4 GSM1988101.CEL  
121-Intestine-large GSM258676.CEL  
120-Intestine-large GSM258675.CEL  
119-Intestine-small GSM258678.CEL  
118-Intestine-small GSM258692.CEL  
117-Lymph-nodes GSM258691.CEL  
116-Lymph-nodes GSM258726.CEL  
115-Spleen GSM258768.CEL  
114-Spleen GSM258767.CEL  
113-Neuro2a GSM258728.CEL  
112-Neuro2a GSM258727.CEL  
111-Astrocytes GSM241898.CEL  
110-mim6 GSM258725.CEL  
109-mim6 GSM258724.CEL  
108-MIMCD3 GSM258723.CEL  
107-MIMCD3 GSM258722.CEL  
106-Bruce4 GSM258656.CEL  
105-Bruce4 GSM258655.CEL  
104-C2C12 GSM258690.CEL  
103-C2C12 GSM258689.CEL  
102-NH3T3 GSM258730.CEL  
101-NH3T3 GSM258729.CEL  
100-3T3-L1 GSM258610.CEL  
99-3T3-L1 GSM258609.CEL  
98-10T12 GSM258632.CEL  
97-10T12 GSM258631.CEL  
96-Osteoblast-d21 GSM258740.CEL  
95-Osteoblast-d21 GSM258739.CEL  
94-Osteoblast-d14 GSM258738.CEL  
93-Osteoblast-d14 GSM258737.CEL  
92-Osteoblast-d5 GSM258742.CEL  
91-Osteoblast-d5 GSM258741.CEL  
90-Chondrocytes GSM266741.CEL  
89-Chondrocytes GSM266740.CEL  
88-Nat Helper cell GSM465594.CEL  
87-Nat Helper cell GSM465593.CEL  
86-LT cell GSM465596.CEL  
85-MS-1 GSM234692.CEL  
84-Lymph-endo-cells GSM143704.CEL  
83-PP-FDC GSM481977.CEL  
82-PP-FDC GSM481978.CEL  
81-PP-FDC GSM481976.CEL  
80-LY-RMLNDCC003001.CEL  
79-LY-RMLNDCC003001.CEL  
78-Follicular-Bcells GSM258664.CEL  
77-Follicular-Bcells GSM258663.CEL  
76-MZ-Bcell GSM258622.CEL  
75-MZ-Bcell GSM258621.CEL  
74-BAF3 GSM258620.CEL  
73-BAF3 GSM258619.CEL  
72-Tregs GSM258778.CEL  
71-Tregs GSM258777.CEL  
70-T-cells-CD8+ GSM258776.CEL  
69-T-cells-CD8+ GSM258775.CEL  
68-T-cells-CD4+ GSM258774.CEL  
67-T-cells-CD4+ GSM258773.CEL  
66-Thymocyte-DN GSM465595.CEL  
65-Osteoclasts GSM258744.CEL  
64-Microglia GSM258721.CEL  
63-Microglia GSM258721.CEL  
62-MM-LPS-7h GSM258706.CEL  
61-MM-LPS-7h GSM258705.CEL  
60-MM-LPS-6h GSM258702.CEL  
59-MM-LPS-6h GSM258701.CEL  
58-BMM-LPS-6h GSM258699.CEL  
57-BMM-LPS-6h GSM258699.CEL  
56-BMM-LPS-6h GSM258699.CEL  
55-BMM-LPS-6h GSM258699.CEL  
54-BMM-LPS-6h GSM258699.CEL  
53-Plasmacytoid-DC GSM258650.CEL  
52-Plasmacytoid-DC GSM258649.CEL  
51-CD8a-DC GSM258647.CEL  
50-CD8a-DC GSM258647.CEL  
49-CD8a+DC GSM258646.CEL  
48-CD8a+DC GSM258645.CEL  
47-NK-cells GSM258732.CEL  
46-NK-cells GSM258731.CEL  
45-Mast-cells-IgE+Ad GSM258718.CEL  
44-Mast-cells-IgE+Ad GSM258717.CEL  
43-Mast-cells-IgE GSM258714.CEL  
42-Mast-cells-IgE GSM258713.CEL  
41-Mast-cells GSM258712.CEL  
40-Granulocytes GSM258668.CEL  
39-Granulocytes GSM258667.CEL  
38-GMP GSM258666.CEL  
37-GMP GSM258665.CEL  
36-GMP GSM258664.CEL  
35-GMP GSM258642.CEL  
34-MEP GSM258720.CEL  
33-MEP GSM258719.CEL  
32-MEP GSM258719.CEL  
31-HSC GSM258770.CEL  
30-HSC GSM258769.CEL  
29-Bone marrow GSM258628.CEL  
28-Bone marrow GSM258627.CEL  
27-Paneth-cells-GF-1 GSM116357.CEL  
26-Paneth-cells-GF-1 GSM116357.CEL  
25-Paneth-cells GSM116350.CEL  
24-Paneth-cells GSM116359.CEL  
23-Paneth-cells GSM318589.CEL  
22-Paneth-cells GSM318590.CEL  
21-Column-Crypt GSM480375.CEL  
20-Column-Crypt GSM480374.CEL  
19-Column-Vill GSM480363.CEL  
18-Column-Vill GSM480362.CEL  
17-Column-IEC-GF GSM349880.CEL  
16-Column-IEC-GF GSM350375.CEL  
15-Ileum-IEC-GF GSM350376.CEL  
14-Ileum-IEC GSM350371.CEL  
13-Small-intestine-epithelium RMINEP002001.CEL  
12-Small-intestine-epithelium RMINEP001001.CEL  
11-FAE-RMPYEP002001.CEL  
10-FAE-RMPYEP001001.CEL  
09-Ileum-IEC GSM190797.CEL  
08-Ileum-IEC GSM190796.CEL  
07-Ileum-IEC GSM190795.CEL  
06-CT-v-M-cells GSM190794.CEL  
05-CT-v-M-cells GSM190793.CEL  
04-CT-v-M-cells GSM190792.CEL  
03-PP-M-cells GSM190791.CEL  
02-PP-M-cells GSM190790.CEL  
01-PP-M-cells GSM190789.CEL



Cluster0189\_Intestine-related (10 nodes)

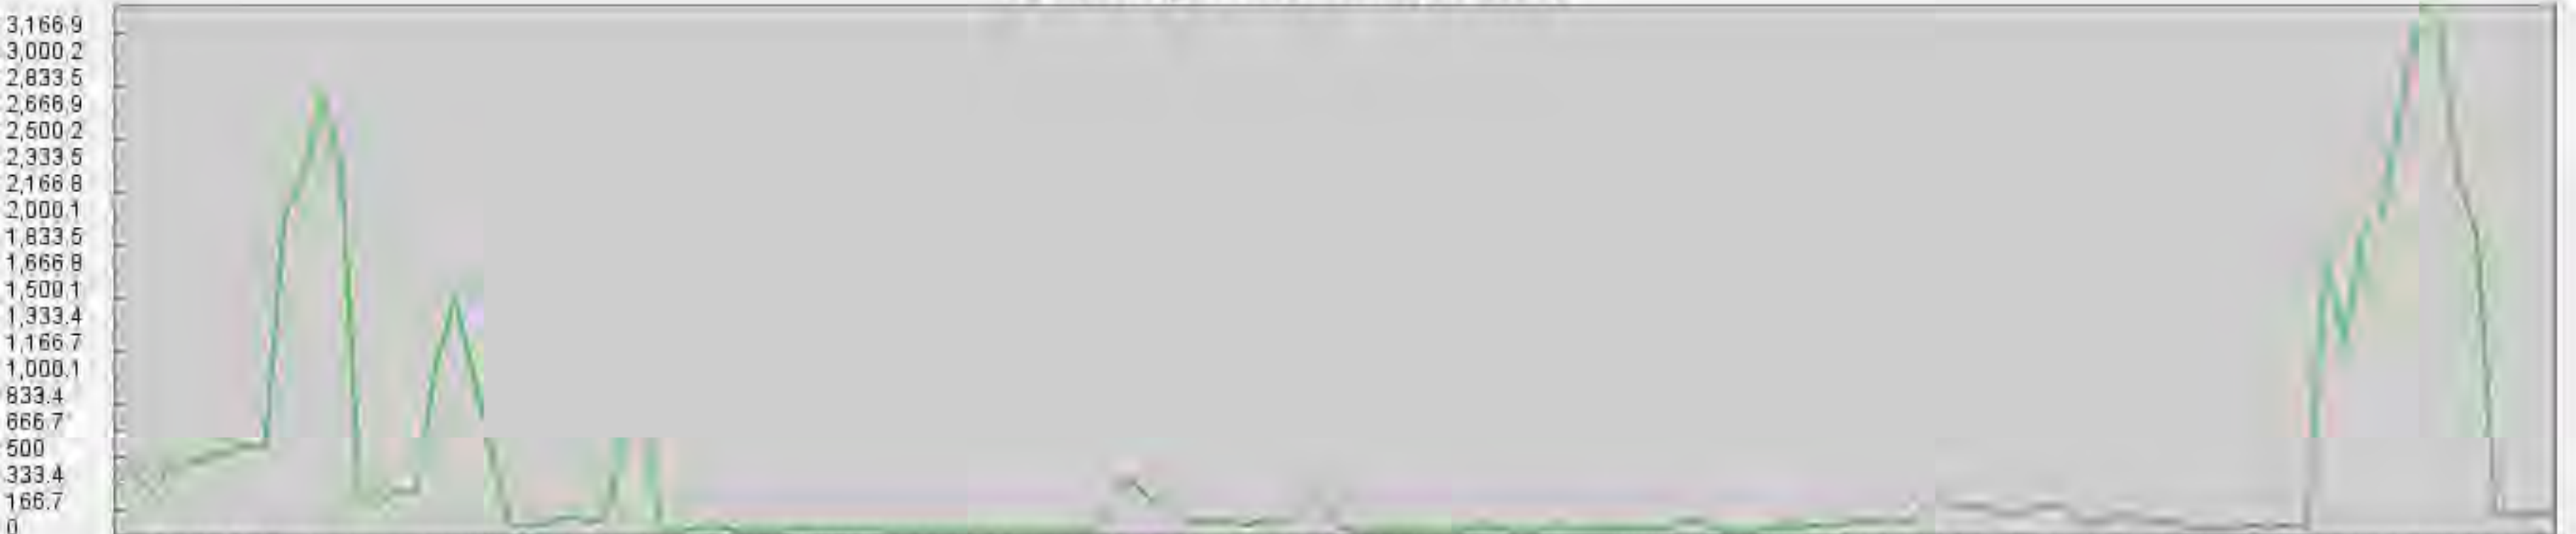

01-PP-M-cells\_GSM190789.CEL  
 02-PP-M-cells\_GSM190790.CEL  
 03-PP-M-cells\_GSM190791.CEL  
 04-CT-V-M-cells\_GSM190792.CEL  
 05-CT-V-M-cells\_GSM190793.CEL  
 06-CT-V-M-cells\_GSM190794.CEL  
 07-Ileum-IEC\_GSM190795.CEL  
 08-Ileum-IEC\_GSM190796.CEL  
 09-Ileum-IEC\_GSM190797.CEL  
 10-FAE-RMP-EP001001.CEL  
 11-FAE-RMP-EP002001.CEL  
 12-Small-intestine-epithelium\_RMINEP001001.CEL  
 13-Small-intestine-epithelium\_RMINEP002001.CEL  
 14-Ileum-IEC\_GSM350371.CEL  
 15-Ileum-IEC\_GSM350375.CEL  
 16-Colon-IEC-Gf\_GSM349880.CEL  
 17-Colon-VIII\_GSM480362.CEL  
 18-Colon-VIII\_GSM480363.CEL  
 19-Colon-VIII\_GSM480364.CEL  
 20-Colon-Crypt\_GSM480374.CEL  
 21-Colon-Crypt\_GSM480375.CEL  
 22-Paneth-cells\_GSM318589.CEL  
 23-Paneth-cells\_GSM318590.CEL  
 24-Paneth-cells\_GSM116359.CEL  
 25-Paneth-cells\_GSM116359.CEL  
 26-Paneth-cells-Gf-1\_GSM116357.CEL  
 27-Paneth-cells-Gf-1\_GSM116357.CEL  
 28-Bone marrow\_GSM258627.CEL  
 29-Bone marrow\_GSM258627.CEL  
 30-HSC\_GSM258770.CEL  
 31-HSC\_GSM258770.CEL  
 32-MEP\_GSM258771.CEL  
 33-MEP\_GSM258771.CEL  
 34-MEP\_GSM258854.CEL  
 35-MEP\_GSM258854.CEL  
 36-GMP\_GSM258866.CEL  
 37-GMP\_GSM258866.CEL  
 38-GMP\_GSM258866.CEL  
 39-Granulocytes\_GSM258667.CEL  
 40-Granulocytes\_GSM258712.CEL  
 41-Mast-cells\_GSM258712.CEL  
 42-Mast-cells-Gf\_GSM258714.CEL  
 43-Mast-cells-Gf\_GSM258714.CEL  
 44-Mast-cells-IgE+Ad\_GSM258718.CEL  
 45-Mast-cells-IgE+Ad\_GSM258718.CEL  
 46-NK-cells\_GSM258732.CEL  
 47-NK-cells\_GSM258732.CEL  
 48-CD8a+DC\_GSM258646.CEL  
 49-CD8a+DC\_GSM258646.CEL  
 50-CD8a-DC\_GSM258647.CEL  
 51-CD8a-DC\_GSM258647.CEL  
 52-Plasmacytoid-DC\_GSM258649.CEL  
 53-Plasmacytoid-DC\_GSM258649.CEL  
 54-BM-LPS-6h\_GSM258694.CEL  
 55-BM-LPS-6h\_GSM258694.CEL  
 56-BM-LPS-6h\_GSM258699.CEL  
 57-BM-LPS-6h\_GSM258699.CEL  
 58-MM-LPS-7h\_GSM258702.CEL  
 59-MM-LPS-7h\_GSM258702.CEL  
 60-MM-LPS-7h\_GSM258706.CEL  
 61-MM-LPS-7h\_GSM258706.CEL  
 62-Microglia\_GSM258721.CEL  
 63-Microglia\_GSM258721.CEL  
 64-Osteoclasts\_GSM258743.CEL  
 65-Osteoclasts\_GSM258743.CEL  
 66-Thymocyte-DN\_GSM465595.CEL  
 67-T-cells-CD4+\_GSM258773.CEL  
 68-T-cells-CD4+\_GSM258773.CEL  
 69-T-cells-CD8+\_GSM258774.CEL  
 70-T-cells-CD8+\_GSM258774.CEL  
 71-Tregs\_GSM258778.CEL  
 72-Tregs\_GSM258778.CEL  
 73-BAF3\_GSM258620.CEL  
 74-BAF3\_GSM258620.CEL  
 75-MZ-Bcell\_GSM258622.CEL  
 76-MZ-Bcell\_GSM258622.CEL  
 77-Follicular-Bcells\_GSM258664.CEL  
 78-Follicular-Bcells\_GSM258664.CEL  
 79-E-L-Y-RMLNDC002001.CEL  
 80-E-L-Y-RMLNDC003001.CEL  
 81-PP-FDC\_GSM481978.CEL  
 82-PP-FDC\_GSM481978.CEL  
 83-PP-FDC\_GSM481978.CEL  
 84-Lymph-endo-cells\_GSM143704.CEL  
 85-MS-1\_GSM234692.CEL  
 86-LTcell\_GSM465596.CEL  
 87-Nat Helper cell\_GSM465593.CEL  
 88-Nat Helper cell\_GSM465593.CEL  
 89-Chondrocytes\_GSM266741.CEL  
 90-Chondrocytes\_GSM266741.CEL  
 91-Osteoblast-d5\_GSM258741.CEL  
 92-Osteoblast-d5\_GSM258742.CEL  
 93-Osteoblast-d14\_GSM258737.CEL  
 94-Osteoblast-d14\_GSM258738.CEL  
 95-Osteoblast-d21\_GSM258739.CEL  
 96-Osteoblast-d21\_GSM258740.CEL  
 97-10T12\_GSM258632.CEL  
 98-10T12\_GSM258632.CEL  
 99-3T3-L1\_GSM258610.CEL  
 100-3T3-L1\_GSM258610.CEL  
 101-NH3T3\_GSM258739.CEL  
 102-NH3T3\_GSM258739.CEL  
 103-C2C12\_GSM258629.CEL  
 104-C2C12\_GSM258630.CEL  
 105-Bruce4\_GSM258656.CEL  
 106-Bruce4\_GSM258656.CEL  
 107-MIMCD3\_GSM258723.CEL  
 108-MIMCD3\_GSM258723.CEL  
 109-mim6\_GSM258725.CEL  
 110-mim6\_GSM258725.CEL  
 111-Astrocytes\_GSM241898.CEL  
 112-Astrocytes\_GSM241898.CEL  
 113-Spleen\_GSM258767.CEL  
 114-Spleen\_GSM258767.CEL  
 115-Lymph-nodes\_GSM258691.CEL  
 116-Lymph-nodes\_GSM258691.CEL  
 117-Lymph-nodes\_GSM258691.CEL  
 118-Intestine-small\_GSM258692.CEL  
 119-Intestine-small\_GSM258692.CEL  
 120-Intestine-large\_GSM258675.CEL  
 121-Intestine-large\_GSM258675.CEL  
 122-Colon-d4\_GSM198101.CEL  
 123-Colon-d4\_GSM198101.CEL  
 124-Colon-d9\_GSM198103.CEL  
 125-Colon-d9\_GSM198103.CEL  
 126-Colon-d9\_GSM198104.CEL  
 127-NALT\_GSM289408.CEL  
 128-NALT\_GSM289409.CEL  
 129-NALT\_GSM289410.CEL  
 130-NALT\_GSM289411.CEL



Cluster0190\_Uncertain-low in many (10 nodes)

231.8  
219.6  
207.4  
195.2  
183  
170.8  
158.6  
146.4  
134.2  
122  
109.8  
97.6  
85.4  
73.2  
61  
48.8  
36.6  
24.4  
12.2  
0

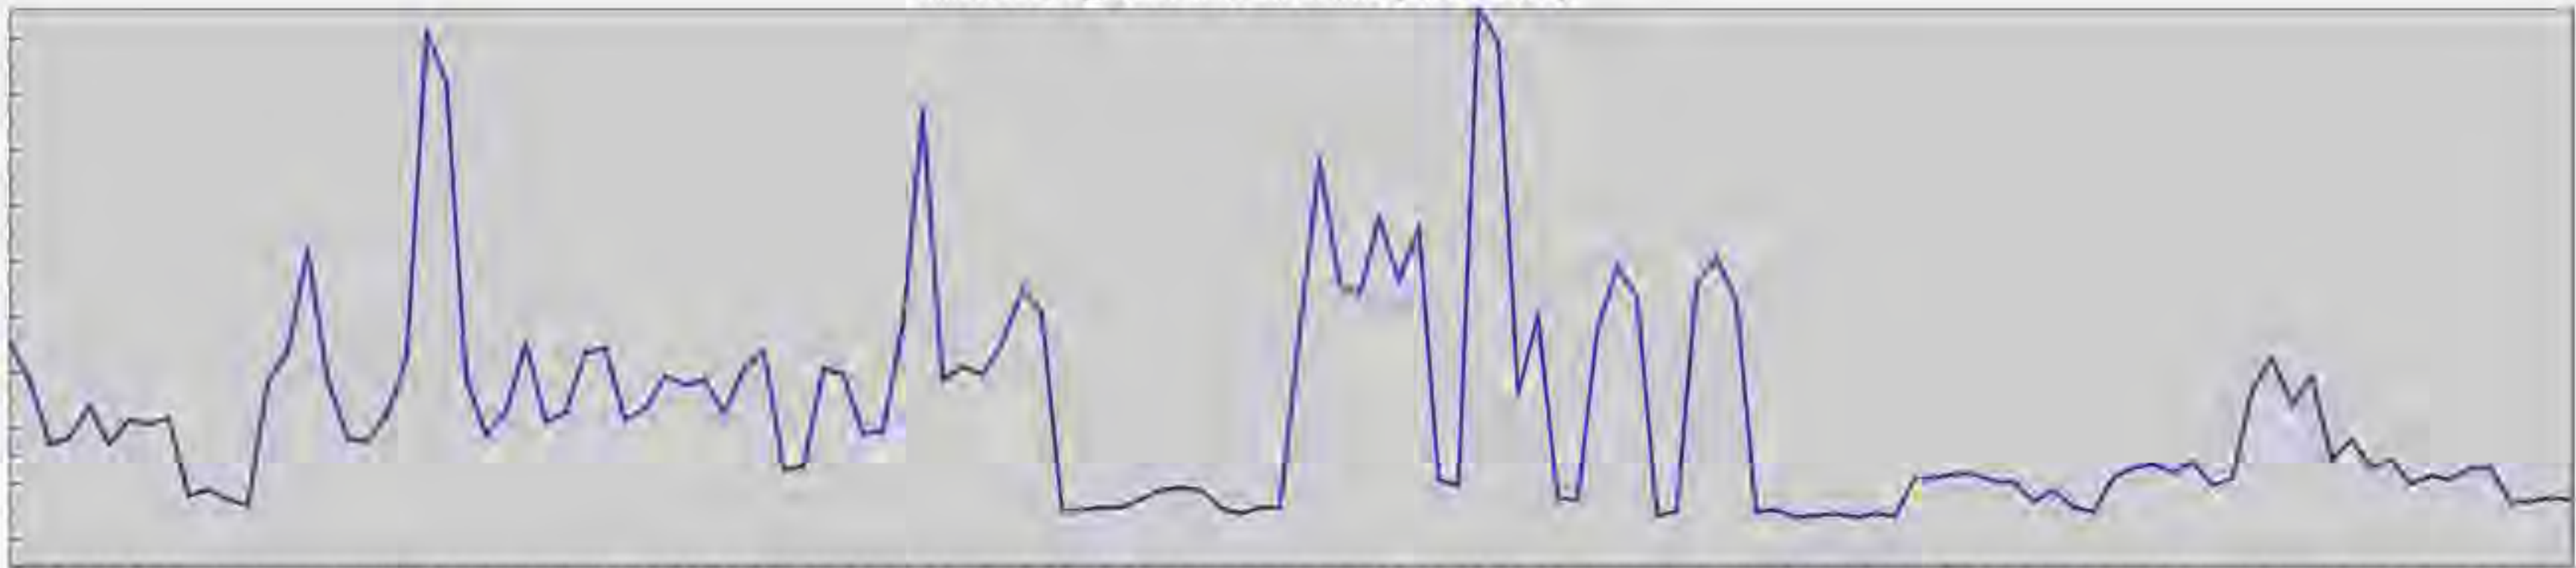

01-PP-M-cells\_GSM190789.CEL  
 02-PP-M-cells\_GSM190790.CEL  
 03-PP-M-cells\_GSM190791.CEL  
 04-CT-v-M-cells\_GSM190792.CEL  
 05-CT-v-M-cells\_GSM190793.CEL  
 06-CT-v-M-cells\_GSM190794.CEL  
 07-Ileum-IEC\_GSM190795.CEL  
 08-Ileum-IEC\_GSM190796.CEL  
 09-Ileum-IEC\_GSM190797.CEL  
 10-FAE-RMPYEP001001.CEL  
 11-FAE-RMPYEP002001.CEL  
 12-Small-intestine-epithelium\_RMINEP001001.CEL  
 13-Small-intestine-epithelium\_RMINEP002001.CEL  
 14-Ileum-IEC\_GSM350371.CEL  
 15-Ileum-IEC\_GSM350375.CEL  
 16-Colon-VIII\_GSM480362.CEL  
 17-Colon-VIII\_GSM480363.CEL  
 18-Colon-VIII\_GSM480364.CEL  
 19-Colon-VIII\_GSM480365.CEL  
 20-Colon-Crypt\_GSM480374.CEL  
 21-Colon-Crypt\_GSM480375.CEL  
 22-Paneth-cells\_GSM318590.CEL  
 23-Paneth-cells\_GSM318589.CEL  
 24-Paneth-cells\_GSM116359.CEL  
 25-Paneth-cells\_GSM116350.CEL  
 26-Paneth-cells-GF-1\_GSM116357.CEL  
 27-Paneth-cells-GF-1\_GSM116358.CEL  
 28-Paneth-cells-GF-1\_GSM116359.CEL  
 29-Bone marrow\_GSM258628.CEL  
 30-HSC\_GSM258770.CEL  
 31-HSC\_GSM258771.CEL  
 32-MEP\_GSM258772.CEL  
 33-MEP\_GSM258773.CEL  
 34-MEP\_GSM258774.CEL  
 35-MEP\_GSM258775.CEL  
 36-MEP\_GSM258776.CEL  
 37-MEP\_GSM258777.CEL  
 38-Granulocytes\_GSM258667.CEL  
 39-Granulocytes\_GSM258668.CEL  
 40-Mast-cells\_GSM258711.CEL  
 41-Mast-cells\_GSM258712.CEL  
 42-Mast-cells-GM-GM\_GSM258713.CEL  
 43-Mast-cells-GM-GM\_GSM258714.CEL  
 44-Mast-cells-GM-GM\_GSM258715.CEL  
 45-Mast-cells-GM-GM\_GSM258716.CEL  
 46-NK-cells\_GSM258732.CEL  
 47-NK-cells\_GSM258733.CEL  
 48-CD8a+DC\_GSM258645.CEL  
 49-CD8a+DC\_GSM258646.CEL  
 50-CD8a+DC\_GSM258647.CEL  
 51-CD8a+DC\_GSM258648.CEL  
 52-Plasmacytoid-DC\_GSM258649.CEL  
 53-Plasmacytoid-DC\_GSM258650.CEL  
 54-BMM-GSM258694.CEL  
 55-BMM-GSM258695.CEL  
 56-BMM-LPS-6h\_GSM258699.CEL  
 57-BMM-LPS-6h\_GSM258700.CEL  
 58-BMM-LPS-7h\_GSM258701.CEL  
 59-BMM-LPS-7h\_GSM258702.CEL  
 60-PP-7h\_GSM258705.CEL  
 61-PP-7h\_GSM258706.CEL  
 62-Microglia\_GSM258721.CEL  
 63-Microglia\_GSM258722.CEL  
 64-Osteoclasts\_GSM258743.CEL  
 65-Osteoclasts\_GSM258744.CEL  
 66-Thymocyte-DN\_GSM465595.CEL  
 67-T-cells-CD4+\_GSM258773.CEL  
 68-T-cells-CD4+\_GSM258774.CEL  
 69-T-cells-CD8+\_GSM258775.CEL  
 70-T-cells-CD8+\_GSM258776.CEL  
 71-Tregs\_GSM258778.CEL  
 72-Tregs\_GSM258779.CEL  
 73-BAF3\_GSM258620.CEL  
 74-BAF3\_GSM258621.CEL  
 75-MZ-Bcell\_GSM258622.CEL  
 76-MZ-Bcell\_GSM258623.CEL  
 77-Follicular-Bcells\_GSM258664.CEL  
 78-Follicular-Bcells\_GSM258665.CEL  
 79-FLY-RMLNDC002001.CEL  
 80-FLY-RMLNDC003001.CEL  
 81-PP-FDC\_GSM481976.CEL  
 82-PP-FDC\_GSM481977.CEL  
 83-PP-FDC\_GSM481978.CEL  
 84-Lymph-endo-cells\_GSM143704.CEL  
 85-MS-1\_GSM234692.CEL  
 86-LTcell\_GSM465596.CEL  
 87-Nat Helper cell\_GSM465593.CEL  
 88-Nat Helper cell\_GSM465594.CEL  
 89-Chondrocytes\_GSM266741.CEL  
 90-Chondrocytes\_GSM266740.CEL  
 91-Osteoblast-d5\_GSM258741.CEL  
 92-Osteoblast-d5\_GSM258742.CEL  
 93-Osteoblast-d14\_GSM258737.CEL  
 94-Osteoblast-d14\_GSM258738.CEL  
 95-Osteoblast-d21\_GSM258740.CEL  
 96-Osteoblast-d21\_GSM258739.CEL  
 97-10T12\_GSM258631.CEL  
 98-10T12\_GSM258632.CEL  
 99-3T3-L1\_GSM258609.CEL  
 100-3T3-L1\_GSM258610.CEL  
 101-NH3T3\_GSM258729.CEL  
 102-NH3T3\_GSM258730.CEL  
 103-C2C12\_GSM258629.CEL  
 104-C2C12\_GSM258630.CEL  
 105-Bruce4\_GSM258666.CEL  
 106-Bruce4\_GSM258665.CEL  
 107-MIMCD3\_GSM258723.CEL  
 108-MIMCD3\_GSM258724.CEL  
 109-mim6\_GSM258725.CEL  
 110-mim6\_GSM258726.CEL  
 111-Astrocytes\_GSM241898.CEL  
 112-Astrocytes\_GSM241899.CEL  
 113-Spleen\_GSM258767.CEL  
 114-Spleen\_GSM258768.CEL  
 115-Spleen\_GSM258769.CEL  
 116-Lymph-nodes\_GSM258691.CEL  
 117-Lymph-nodes\_GSM258692.CEL  
 118-Intestine-small\_GSM258677.CEL  
 119-Intestine-small\_GSM258678.CEL  
 120-Intestine-large\_GSM258675.CEL  
 121-Intestine-large\_GSM258676.CEL  
 122-Colon-d4\_GSM198101.CEL  
 123-Colon-d4\_GSM198102.CEL  
 124-Colon-d9\_GSM198103.CEL  
 125-Colon-d9\_GSM198104.CEL  
 126-Colon-d9\_GSM198105.CEL  
 127-NALT\_GSM289408.CEL  
 128-NALT\_GSM289409.CEL  
 129-NALT\_GSM289410.CEL  
 130-NALT\_GSM289411.CEL



Cluster0191\_High in Bruce4 and min6 cells (10 nodes)

345.1  
327  
308.8  
290.7  
272.5  
254.3  
236.2  
218  
199.8  
181.7  
163.5  
145.3  
127.2  
109  
90.8  
72.7  
54.5  
36.3  
18.2  
0

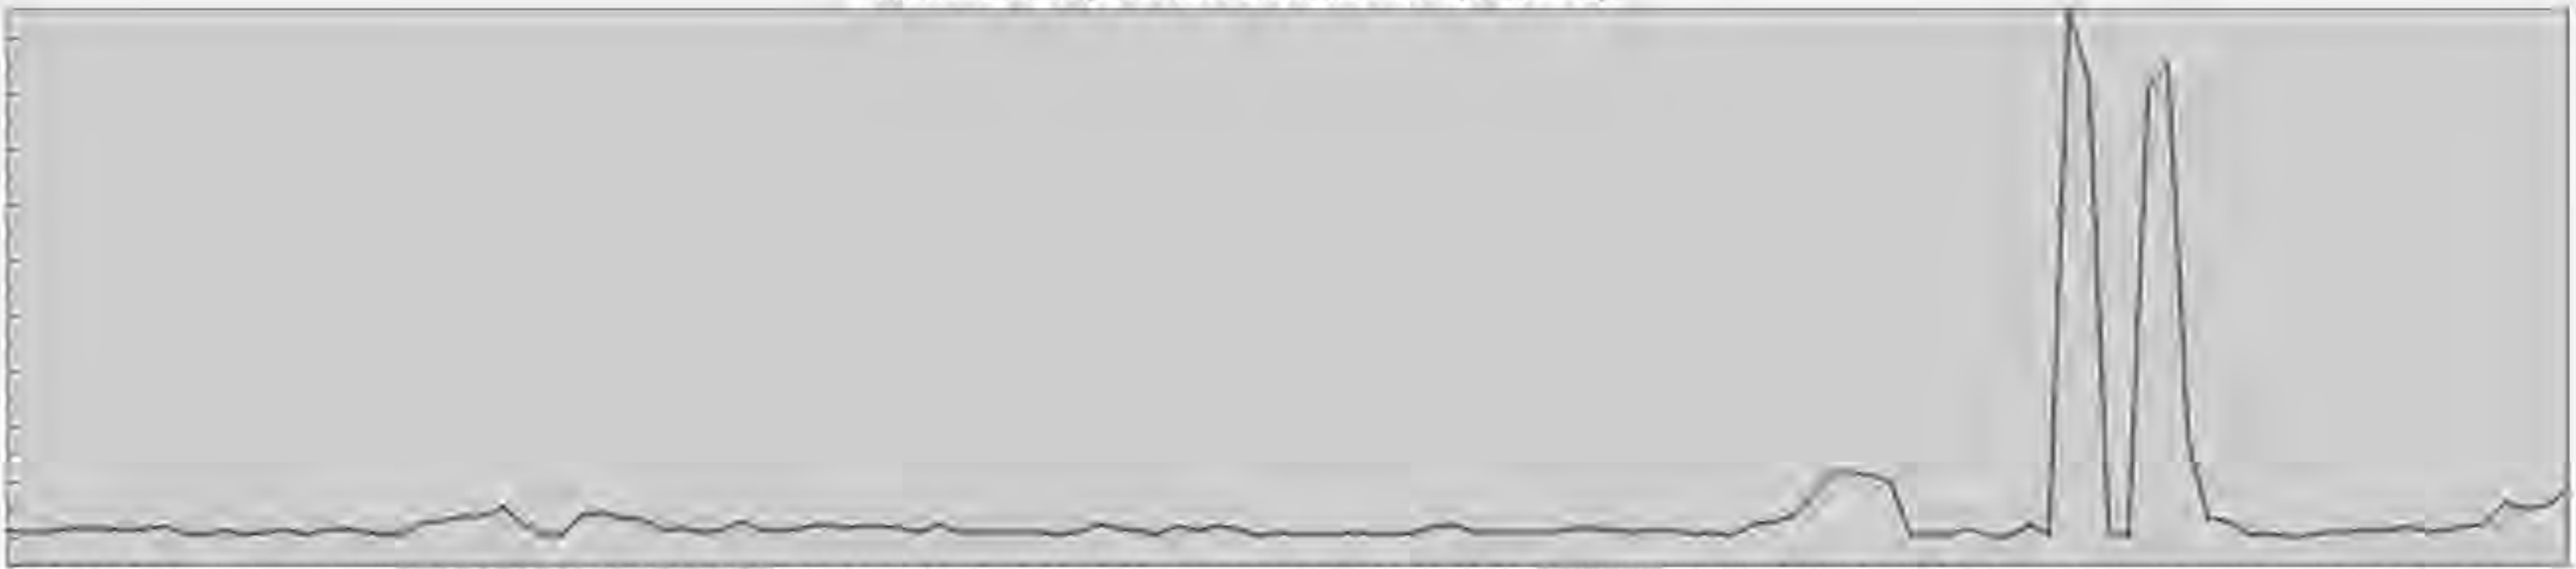

30-NALT GSM289411 CELL  
 139-NALT GSM289410 CELL  
 138-NALT GSM289409 CELL  
 137-NALT GSM289408 CELL  
 136-Color-d9 GSM1988105 CELL  
 135-Color-d9 GSM1988104 CELL  
 134-Color-d9 GSM1988103 CELL  
 133-Color-d4 GSM1988102 CELL  
 132-Color-d4 GSM1988101 CELL  
 131-Intestine-large GSM258676 CELL  
 130-Intestine-large GSM258675 CELL  
 129-Intestine-small GSM258674 CELL  
 118-Intestine-small GSM258673 CELL  
 117-Lymph-nodes GSM258672 CELL  
 116-Lymph-nodes GSM258671 CELL  
 115-Spleen GSM258767 CELL  
 114-Spleen GSM258766 CELL  
 113-Neuro2a GSM258729 CELL  
 112-Neuro2a GSM258728 CELL  
 111-Astrocytes GSM241898 CELL  
 110-min6 GSM258726 CELL  
 109-min6 GSM258725 CELL  
 108-MIMCD3 GSM258724 CELL  
 107-MIMCD3 GSM258723 CELL  
 106-Bruce4 GSM258656 CELL  
 105-Bruce4 GSM258655 CELL  
 104-C2C12 GSM258690 CELL  
 103-C2C12 GSM258689 CELL  
 102-NH3T3 GSM258739 CELL  
 101-NH3T3 GSM258738 CELL  
 100-3T3-L1 GSM258610 CELL  
 99-3T3-L1 GSM258609 CELL  
 98-10T12 GSM258632 CELL  
 97-10T12 GSM258631 CELL  
 96-Osteoblast-d21 GSM258740 CELL  
 95-Osteoblast-d21 GSM258739 CELL  
 94-Osteoblast-d14 GSM258738 CELL  
 93-Osteoblast-d14 GSM258737 CELL  
 92-Osteoblast-d5 GSM258742 CELL  
 91-Osteoblast-d5 GSM258741 CELL  
 90-Chondrocytes GSM266741 CELL  
 89-Chondrocytes GSM266740 CELL  
 88-Nat Helper cell GSM465594 CELL  
 87-Nat Helper cell GSM465593 CELL  
 86-T cell GSM465596 CELL  
 85-MS-1 GSM234692 CELL  
 84-Lymph-endo-cells GSM143704 CELL  
 83-P-FDC GSM481977 CELL  
 82-P-FDC GSM481978 CELL  
 81-P-FDC GSM481976 CELL  
 80-L-Y RMLNDCC003001 CELL  
 79-L-Y RMLNDCC003001 CELL  
 78-Follicular-B-cells GSM258664 CELL  
 77-Follicular-B-cells GSM258663 CELL  
 76-MZ-Bcell GSM258627 CELL  
 75-MZ-Bcell GSM258627 CELL  
 74-BAF3 GSM258620 CELL  
 73-BAF3 GSM258619 CELL  
 72-Tregs GSM258778 CELL  
 71-Tregs GSM258777 CELL  
 70-T-cells-CD8+ GSM258776 CELL  
 69-T-cells-CD8+ GSM258774 CELL  
 68-T-cells-CD4+ GSM258773 CELL  
 67-T-cells-CD4+ GSM258744 CELL  
 66-Thymocyte-DN GSM465595 CELL  
 65-Osteoclasts GSM258743 CELL  
 64-Osteoclasts GSM258743 CELL  
 63-Microglia GSM258721 CELL  
 62-Microglia GSM258721 CELL  
 61-MM-LPS-7h GSM258706 CELL  
 60-MM-LPS-7h GSM258706 CELL  
 59-MM-LPS-6h GSM258702 CELL  
 58-MM-LPS-6h GSM258702 CELL  
 57-MM-LPS-6h GSM258699 CELL  
 56-MM-LPS-6h GSM258699 CELL  
 55-MM-LPS-6h GSM258694 CELL  
 54-MM-LPS-6h GSM258694 CELL  
 53-Ismacryoid-DC GSM258650 CELL  
 52-Ismacryoid-DC GSM258649 CELL  
 51-CD8a-DC GSM258648 CELL  
 50-CD8a-DC GSM258647 CELL  
 49-CD8a+DC GSM258646 CELL  
 48-CD8a+DC GSM258646 CELL  
 47-NK-cells GSM258732 CELL  
 46-NK-cells GSM258732 CELL  
 45-Mast-cells-IgE+Ad GSM258718 CELL  
 44-Mast-cells-IgE+Ad GSM258717 CELL  
 43-Mast-cells-IgE GSM258714 CELL  
 42-Mast-cells-IgE GSM258713 CELL  
 41-Mast-cells GSM258712 CELL  
 40-Granulocytes GSM258668 CELL  
 39-Granulocytes GSM258667 CELL  
 38-GMP GSM258666 CELL  
 37-GMP GSM258665 CELL  
 36-GMP GSM258664 CELL  
 35-GMP GSM258642 CELL  
 34-MIEP GSM258720 CELL  
 33-MIEP GSM258720 CELL  
 32-MIEP GSM258719 CELL  
 31-HESC GSM258770 CELL  
 30-HESC GSM258769 CELL  
 29-Bone marrow GSM258628 CELL  
 28-Bone marrow GSM258627 CELL  
 27-paneth-cells-GE GSM116358 CELL  
 26-paneth-cells-GE GSM116357 CELL  
 25-paneth-cells GSM116350 CELL  
 24-paneth-cells GSM116359 CELL  
 23-paneth-cells GSM318589 CELL  
 22-paneth-cells GSM318590 CELL  
 21-paneth-cells GSM318590 CELL  
 20-Colon-Crypt GSM480375 cel  
 19-Colon-Vill GSM480363 cel  
 18-Colon-Vill GSM480362 cel  
 17-Colon-IEC-Gf GSM349880 CELL  
 16-Colon-IEC-Gf GSM350375 CELL  
 15-Ileum-IEC-Gf GSM350376 CELL  
 14-Ileum-IEC GSM350371 CELL  
 13-Small-intestine-epithelium RMINEP002001 CELL  
 12-Small-intestine-epithelium RMINEP001001 CELL  
 11-FAE RMPYEP002001 CELL  
 10-FAE RMPYEP001001 CELL  
 09-Ileum-IEC GSM190797 CELL  
 08-Ileum-IEC GSM190796 CELL  
 07-Ileum-IEC GSM190795 CELL  
 06-CT-w-M-cells GSM190794 CELL  
 05-CT-y-M-cells GSM190793 CELL  
 04-PP-M-cells GSM190792 CELL  
 03-PP-M-cells GSM190791 CELL  
 02-PP-M-cells GSM190790 CELL  
 01-PP-M-cells GSM190789 CELL



## Cluster0192\_Intestine-related (10 nodes)

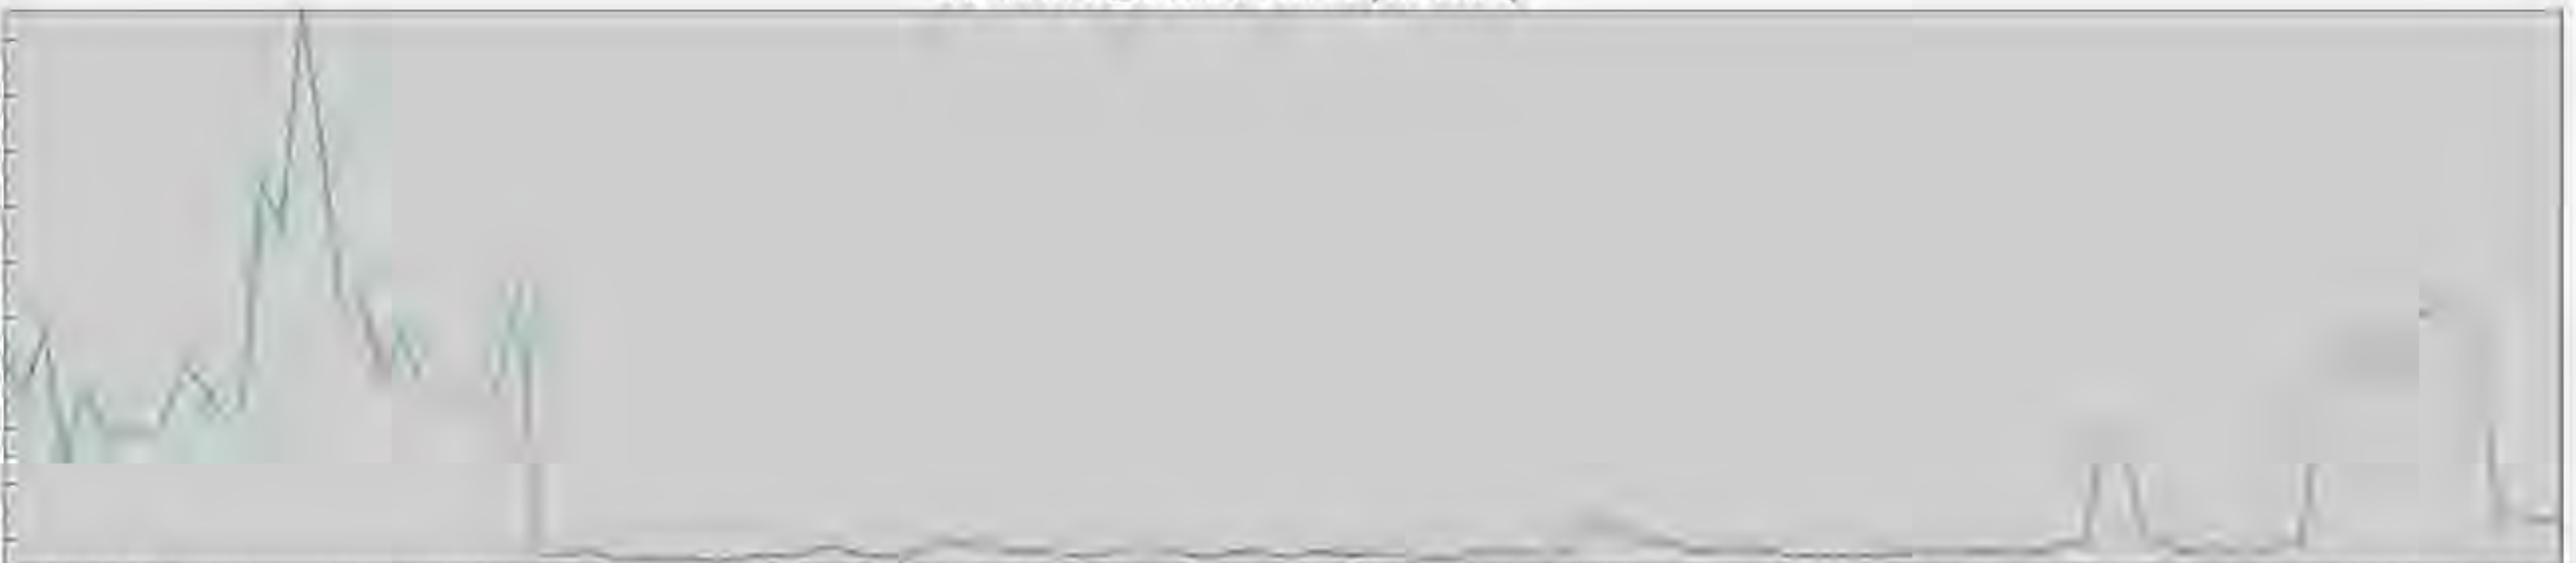

|     |                            |              |      |
|-----|----------------------------|--------------|------|
| 0   | PP-M-cells                 | GSM190789    | CEL  |
| 1   | PP-M-cells                 | GSM190790    | CEL  |
| 2   | PP-M-cells                 | GSM190791    | CEL  |
| 3   | PP-M-cells                 | GSM190792    | CEL  |
| 4   | CT-v-M-cells               | GSM190793    | CEL  |
| 5   | CT-v-M-cells               | GSM190794    | CEL  |
| 6   | CT-v-M-cells               | GSM190795    | CEL  |
| 7   | Ileum-IEC                  | GSM190796    | CEL  |
| 8   | Ileum-IEC                  | GSM190797    | CEL  |
| 9   | Ileum-IEC                  | GSM190798    | CEL  |
| 10  | FAE-RMP                    | GSM190799    | CEL  |
| 11  | FAE-RMP                    | GSM190800    | CEL  |
| 12  | Small-intestine-epithelium | RMINEP001001 | CEL  |
| 13  | Small-intestine-epithelium | RMINEP002001 | CEL  |
| 14  | Ileum-IEC                  | GSM350371    | CEL  |
| 15  | Colon-IEC                  | GSM350375    | CEL  |
| 16  | Colon-Vill                 | GSM480362    | cel  |
| 17  | Colon-Vill                 | GSM480363    | cel  |
| 18  | Colon-Vill                 | GSM480364    | cel  |
| 19  | Colon-Crypt                | GSM480374    | cel  |
| 20  | Colon-Crypt                | GSM480375    | cel  |
| 21  | Colon-Crypt                | GSM480376    | cel  |
| 22  | Paneth-cells               | GSM318589    | CEL  |
| 23  | Paneth-cells               | GSM318590    | CEL  |
| 24  | Paneth-cells               | GSM116359    | CEL  |
| 25  | Paneth-cells               | GSM116360    | CEL  |
| 26  | Paneth-cells               | GSM116361    | CEL  |
| 27  | Paneth-cells               | GSM116362    | CEL  |
| 28  | Bone marrow                | GSM258677    | CEL  |
| 29  | Bone marrow                | GSM258678    | CEL  |
| 30  | NALT                       | GSM289411    | CELL |
| 31  | NALT                       | GSM289410    | CELL |
| 32  | NALT                       | GSM289409    | CELL |
| 33  | NALT                       | GSM289408    | CELL |
| 34  | Colon-d9                   | GSM198810    | CELL |
| 35  | Colon-d9                   | GSM198811    | CELL |
| 36  | Colon-d9                   | GSM198812    | CELL |
| 37  | Colon-d4                   | GSM198813    | CELL |
| 38  | Colon-d4                   | GSM198814    | CELL |
| 39  | Colon-d4                   | GSM198815    | CELL |
| 40  | Intestine-large            | GSM258675    | CEL  |
| 41  | Intestine-large            | GSM258676    | CEL  |
| 42  | Intestine-small            | GSM258677    | CEL  |
| 43  | Intestine-small            | GSM258678    | CEL  |
| 44  | Spleen                     | GSM258679    | CEL  |
| 45  | Spleen                     | GSM258680    | CEL  |
| 46  | Neuro2a                    | GSM241898    | CEL  |
| 47  | Astrocytes                 | GSM241899    | CEL  |
| 48  | ming                       | GSM258726    | CEL  |
| 49  | ming                       | GSM258727    | CEL  |
| 50  | MIMCD3                     | GSM258728    | CEL  |
| 51  | MIMCD3                     | GSM258729    | CEL  |
| 52  | MIMCD3                     | GSM258730    | CEL  |
| 53  | Bruce4                     | GSM258731    | CEL  |
| 54  | Bruce4                     | GSM258732    | CEL  |
| 55  | C2C12                      | GSM258733    | CEL  |
| 56  | C2C12                      | GSM258734    | CEL  |
| 57  | NH3T3                      | GSM258735    | CEL  |
| 58  | NH3T3                      | GSM258736    | CEL  |
| 59  | 3T3-L1                     | GSM258609    | CEL  |
| 60  | 3T3-L1                     | GSM258610    | CEL  |
| 61  | 10T1/2                     | GSM258631    | CEL  |
| 62  | 10T1/2                     | GSM258632    | CEL  |
| 63  | Osteoblast-d21             | GSM258740    | CEL  |
| 64  | Osteoblast-d21             | GSM258739    | CEL  |
| 65  | Osteoblast-d14             | GSM258738    | CEL  |
| 66  | Osteoblast-d14             | GSM258737    | CEL  |
| 67  | Osteoblast-d5              | GSM258742    | CEL  |
| 68  | Osteoblast-d5              | GSM258741    | CEL  |
| 69  | Chondrocytes               | GSM258741    | CEL  |
| 70  | Chondrocytes               | GSM258740    | CEL  |
| 71  | Nat Helper cell            | GSM465594    | CEL  |
| 72  | Nat Helper cell            | GSM465593    | CEL  |
| 73  | LT cell                    | GSM465596    | CEL  |
| 74  | MS-1                       | GSM234692    | CEL  |
| 75  | Lymph-endo-cells           | GSM143704    | CEL  |
| 76  | FDC                        | GSM481977    | CEL  |
| 77  | FDC                        | GSM481978    | CEL  |
| 78  | FDC                        | GSM481979    | CEL  |
| 79  | FDC                        | GSM481976    | CEL  |
| 80  | PP-FDC                     | GSM481976    | CEL  |
| 81  | PP-FDC                     | GSM481976    | CEL  |
| 82  | Y-RMLNDC                   | GSM20001     | CEL  |
| 83  | Y-RMLNDC                   | GSM20001     | CEL  |
| 84  | Follicular-Bcells          | GSM258664    | CEL  |
| 85  | Follicular-Bcells          | GSM258663    | CEL  |
| 86  | MZ-Bcell                   | GSM258627    | CEL  |
| 87  | MZ-Bcell                   | GSM258627    | CEL  |
| 88  | BAF3                       | GSM258620    | CEL  |
| 89  | BAF3                       | GSM258619    | CEL  |
| 90  | Tregs                      | GSM258778    | CEL  |
| 91  | Tregs                      | GSM258777    | CEL  |
| 92  | Tregs                      | GSM258777    | CEL  |
| 93  | Tregs                      | GSM258777    | CEL  |
| 94  | Tregs                      | GSM258777    | CEL  |
| 95  | Tregs                      | GSM258777    | CEL  |
| 96  | Tregs                      | GSM258777    | CEL  |
| 97  | Tregs                      | GSM258777    | CEL  |
| 98  | Tregs                      | GSM258777    | CEL  |
| 99  | Tregs                      | GSM258777    | CEL  |
| 100 | Tregs                      | GSM258777    | CEL  |
| 101 | Tregs                      | GSM258777    | CEL  |
| 102 | Tregs                      | GSM258777    | CEL  |
| 103 | Tregs                      | GSM258777    | CEL  |
| 104 | Tregs                      | GSM258777    | CEL  |
| 105 | Tregs                      | GSM258777    | CEL  |
| 106 | Tregs                      | GSM258777    | CEL  |
| 107 | Tregs                      | GSM258777    | CEL  |
| 108 | Tregs                      | GSM258777    | CEL  |
| 109 | Tregs                      | GSM258777    | CEL  |
| 110 | Tregs                      | GSM258777    | CEL  |
| 111 | Tregs                      | GSM258777    | CEL  |
| 112 | Tregs                      | GSM258777    | CEL  |
| 113 | Tregs                      | GSM258777    | CEL  |
| 114 | Tregs                      | GSM258777    | CEL  |
| 115 | Tregs                      | GSM258777    | CEL  |
| 116 | Tregs                      | GSM258777    | CEL  |
| 117 | Tregs                      | GSM258777    | CEL  |
| 118 | Tregs                      | GSM258777    | CEL  |
| 119 | Tregs                      | GSM258777    | CEL  |
| 120 | Tregs                      | GSM258777    | CEL  |
| 121 | Tregs                      | GSM258777    | CEL  |
| 122 | Tregs                      | GSM258777    | CEL  |
| 123 | Tregs                      | GSM258777    | CEL  |
| 124 | Tregs                      | GSM258777    | CEL  |
| 125 | Tregs                      | GSM258777    | CEL  |
| 126 | Tregs                      | GSM258777    | CEL  |
| 127 | Tregs                      | GSM258777    | CEL  |
| 128 | Tregs                      | GSM258777    | CEL  |
| 129 | Tregs                      | GSM258777    | CEL  |
| 130 | Tregs                      | GSM258777    | CEL  |



Cluster0193\_Intestine-related (10 nodes)

2,718  
2,575  
2,431.9  
2,288.9  
2,145.8  
2,002.8  
1,859.7  
1,716.7  
1,573.6  
1,430.6  
1,287.5  
1,144.4  
1,001.4  
858.3  
715.3  
572.2  
429.2  
286.1  
143.1  
0

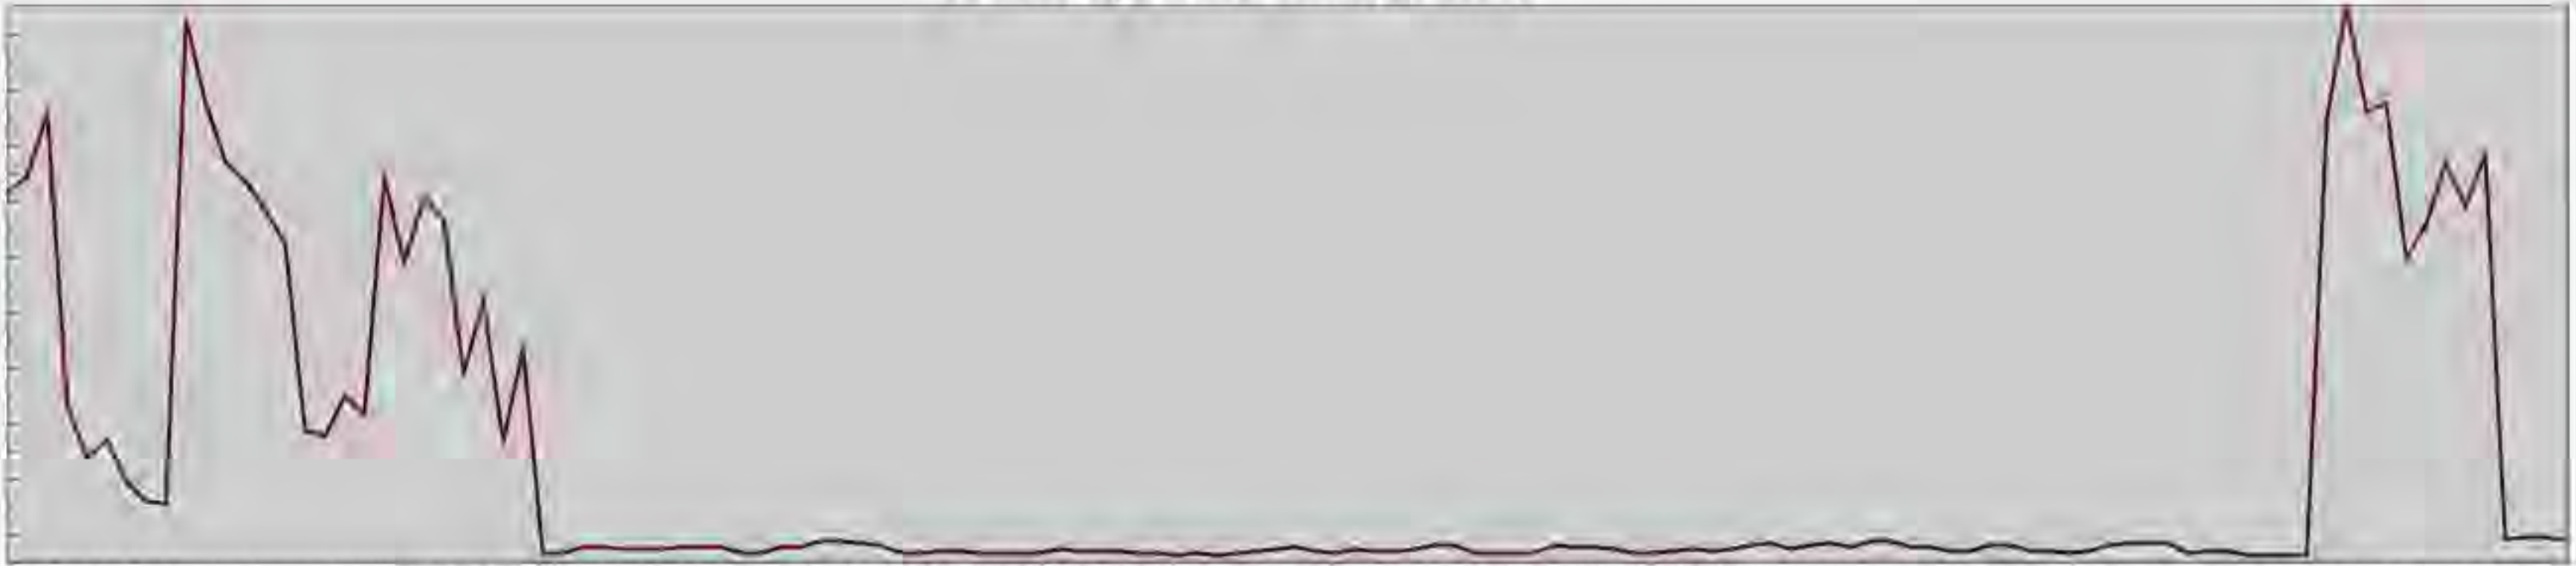

130-NALT GSM289411 CELL  
129-NALT GSM289410 CELL  
128-NALT GSM289409 CELL  
127-NALT GSM289408 CELL  
126-Color-d9 GSM1988105 CELL  
125-Color-d9 GSM1988104 CELL  
124-Color-d9 GSM1988103 CELL  
123-Color-d4 GSM1988102 CELL  
122-Color-d4 GSM1988101 CELL  
121-Intestine-large GSM258676 CELL  
120-Intestine-large GSM258675 CELL  
119-Intestine-small GSM258674 CELL  
118-Intestine-small GSM258673 CELL  
117-Lymph-nodes GSM258691 CELL  
116-Lymph-nodes GSM258692 CELL  
115-Spleen GSM258767 CELL  
114-Spleen GSM258768 CELL  
113-Neuro2a GSM241898 CELL  
112-Neuro2a GSM241899 CELL  
111-Astrocytes GSM241898 CELL  
110-mimb GSM258726 CELL  
109-mimb GSM258725 CELL  
108-MIMCD3 GSM258724 CELL  
107-MIMCD3 GSM258723 CELL  
106-Bruce4 GSM258656 CELL  
105-Bruce4 GSM258655 CELL  
104-C2C12 GSM258690 CELL  
103-C2C12 GSM258689 CELL  
102-NH3T3 GSM258739 CELL  
101-NH3T3 GSM258739 CELL  
100-3T3-L1 GSM258610 CELL  
99-3T3-L1 GSM258609 CELL  
98-10T12 GSM258632 CELL  
97-10T12 GSM258631 CELL  
96-Osteoblast-d21 GSM258740 CELL  
95-Osteoblast-d21 GSM258739 CELL  
94-Osteoblast-d14 GSM258738 CELL  
93-Osteoblast-d14 GSM258737 CELL  
92-Osteoblast-d5 GSM258742 CELL  
91-Osteoblast-d5 GSM258741 CELL  
90-Chondrocytes GSM266741 CELL  
89-Chondrocytes GSM266740 CELL  
88-Nat Helper cell GSM465594 CELL  
87-Nat Helper cell GSM465593 CELL  
86-TT cell GSM465596 CELL  
85-MS-1 GSM234692 CELL  
84-Lymph-endo-cells GSM143704 CELL  
83-PP-FDC GSM481977 CELL  
82-PP-FDC GSM481978 CELL  
81-PP-FDC GSM481976 CELL  
80-F-LY RMLNDCC003001 CELL  
79-F-LY RMLNDCC003001 CELL  
78-Follicular-Bcells GSM258664 CELL  
77-Follicular-Bcells GSM258663 CELL  
76-MZ-Bcell GSM258627 CELL  
75-MZ-Bcell GSM258627 CELL  
74-BAF3 GSM258620 CELL  
73-BAF3 GSM258619 CELL  
72-Tregs GSM258778 CELL  
71-Tregs GSM258777 CELL  
70-T-cells CD8+ GSM258776 CELL  
69-T-cells CD8+ GSM258774 CELL  
68-T-cells CD4+ GSM258773 CELL  
67-T-cells CD4+ GSM258773 CELL  
66-Thymocyte-DN GSM465595 CELL  
65-Osteoclasts GSM258743 CELL  
64-Osteoclasts GSM258743 CELL  
63-Microglia GSM258721 CELL  
62-Microglia GSM258721 CELL  
61-MM-LPS-7h GSM268706 CELL  
60-MM-LPS-7h GSM268706 CELL  
59-MM-LPS-6h GSM258702 CELL  
58-MM-LPS-6h GSM258702 CELL  
57-MM-LPS-6h GSM258699 CELL  
56-MM-LPS-6h GSM258699 CELL  
55-MM-LPS-6h GSM258694 CELL  
54-MM-LPS-6h GSM258694 CELL  
53-Ismacryoid-DC GSM258650 CELL  
52-Ismacryoid-DC GSM258649 CELL  
51-CD8a-DC GSM258648 CELL  
50-CD8a-DC GSM258647 CELL  
49-CD8a+DC GSM258646 CELL  
48-CD8a+DC GSM258646 CELL  
47-NK-cells GSM258732 CELL  
46-NK-cells GSM258731 CELL  
45-Mast-cells-IgE+Ad GSM258719 CELL  
44-Mast-cells-IgE+Ad GSM258717 CELL  
43-Mast-cells-IgE GSM258714 CELL  
42-Mast-cells-IgE GSM258713 CELL  
41-Mast-cells GSM258712 CELL  
40-Granulocytes GSM258712 CELL  
39-Granulocytes GSM258667 CELL  
38-GMP GSM258666 CELL  
37-GMP GSM258665 CELL  
36-GMP GSM258665 CELL  
35-CMP GSM258642 CELL  
34-CMP GSM258642 CELL  
33-MEP GSM258720 CELL  
32-MEP GSM258719 CELL  
31-HSC GSM258770 CELL  
30-HSC GSM258769 CELL  
29-Bone marrow GSM258628 CELL  
28-Bone marrow GSM258627 CELL  
27-paneth-cells-GE GSM116358 CELL  
26-paneth-cells-GE GSM116357 CELL  
25-paneth-cells GSM116350 CELL  
24-paneth-cells GSM116359 CELL  
23-paneth-cells GSM318589 CELL  
22-paneth-cells GSM318590 CELL  
21-paneth-cells GSM318590 CELL  
20-Color-Crypt GSM480375 cel  
19-Color-Vill GSM480363 cel  
18-Color-Vill GSM480362 cel  
17-Color-IEC-GE GSM349880 CELL  
16-Color-IEC-GE GSM350375 CELL  
15-Ileum-IEC GSM350376 CELL  
14-Ileum-IEC GSM350371 CELL  
13-Small-intestine-epithelium RMINEP002901 CELL  
12-Small-intestine-epithelium RMINEP001001 CELL  
11-FAE RMPYEP002001 CELL  
10-FAE RMPYEP001001 CELL  
09-Ileum-IEC GSM190797 CELL  
08-Ileum-IEC GSM190796 CELL  
07-Ileum-IEC GSM190795 CELL  
06-CT-v-M-cells GSM190794 CELL  
05-CT-v-M-cells GSM190793 CELL  
04-CT-v-M-cells GSM190792 CELL  
03-PP-M-cells GSM190791 CELL  
02-PP-M-cells GSM190790 CELL  
01-PP-M-cells GSM190789 CELL



Cluster0194\_High in plasmacytoid DC and B cells (10 nodes)

1,050.4  
995.1  
939.8  
884.6  
829.3  
774  
718.7  
663.4  
608.1  
552.8  
497.6  
442.3  
387  
331.7  
276.4  
221.1  
165.9  
110.6  
55.3  
0

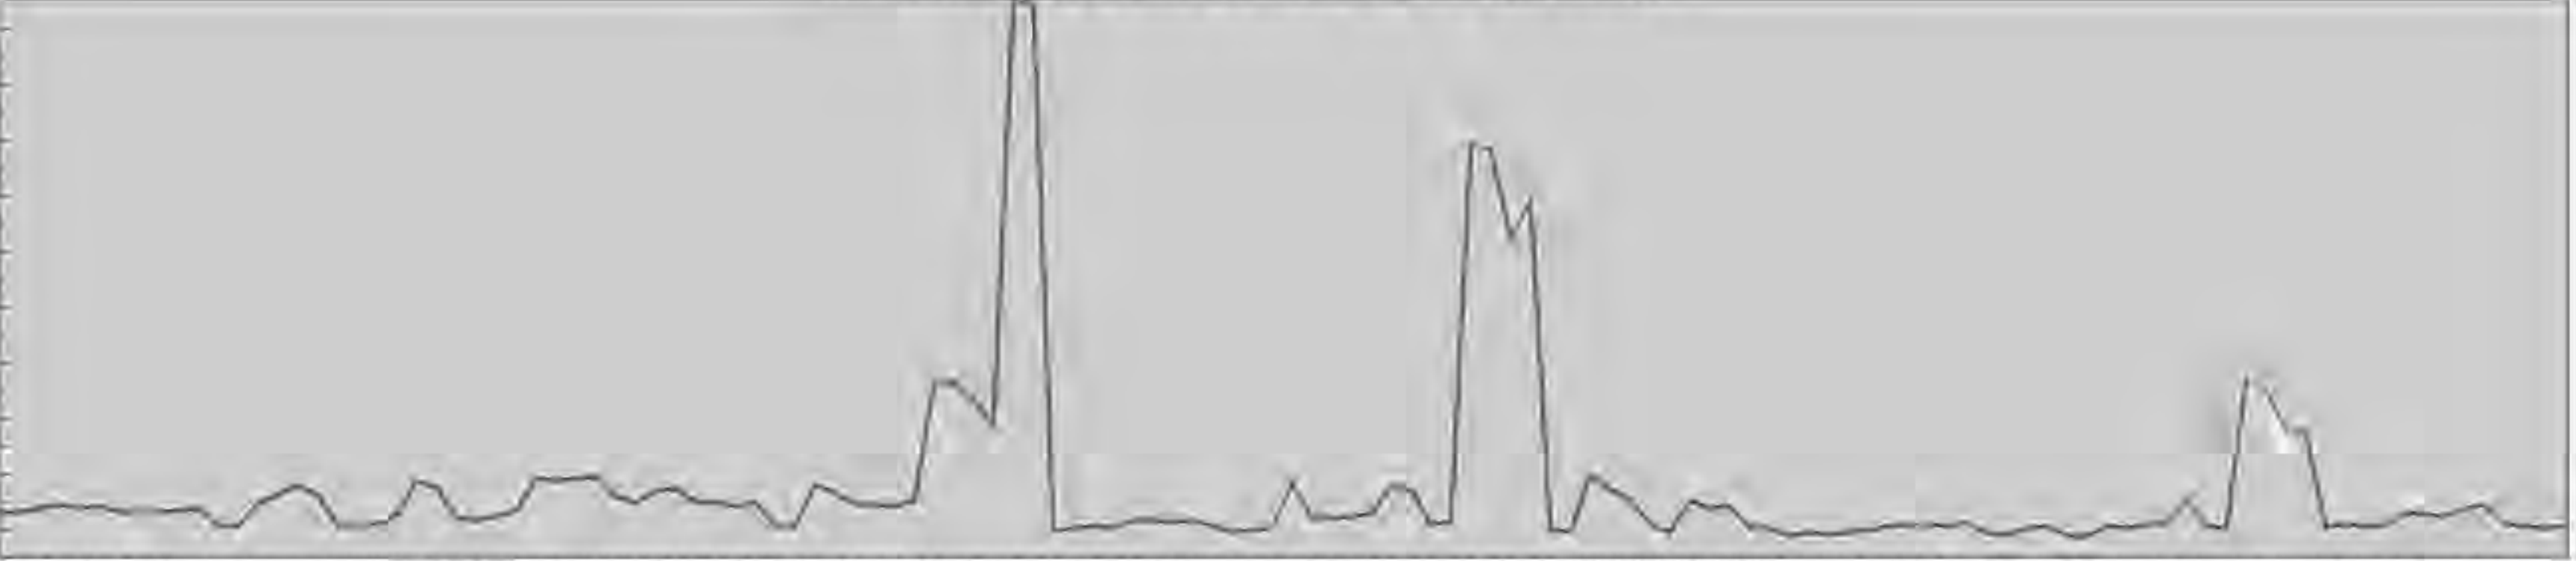

30-NALT GSM289411 CEL  
 29-NALT GSM289410 CEL  
 28-NALT GSM289409 CEL  
 27-NALT GSM289408 CEL  
 26-paneth-cells GSM1988105 CEL  
 25-paneth-cells GSM1988104 CEL  
 24-paneth-cells GSM1988103 CEL  
 23-paneth-cells GSM1988102 CEL  
 22-paneth-cells GSM3185890 CEL  
 21-Colon-Crypt GSM480375 cel  
 20-Colon-Crypt GSM480374 cel  
 19-Colon-Vill GSM480363 cel  
 18-Colon-Vill GSM480362 cel  
 17-Colon-IEC-Gf GSM349880 CEL  
 16-Colon-IEC-Gf GSM350375 CEL  
 15-Ileum-IEC-Gf GSM350376 CEL  
 14-Ileum-IEC GSM350371 CEL  
 13-Small-intestine-epithelium\_RMINEP002001 CEL  
 12-Small-intestine-epithelium\_RMINEP001001 CEL  
 11-FAE-RMPYEP002001 CEL  
 10-FAE-RMPYEP001001 CEL  
 09-Ileum-IEC GSM190797 CEL  
 08-Ileum-IEC GSM190796 CEL  
 07-Ileum-IEC GSM190795 CEL  
 06-CT-v-M-cells GSM190794 CEL  
 05-CT-v-M-cells GSM190793 CEL  
 04-CT-v-M-cells GSM190792 CEL  
 03-PP-M-cells GSM190791 CEL  
 02-PP-M-cells GSM190790 CEL  
 01-PP-M-cells GSM190789 CEL  
 101-PP-M-cells GSM190789 CEL  
 100-3T3-L1 GSM258610 CEL  
 99-3T3-L1 GSM258609 CEL  
 98-10T12 GSM258632 CEL  
 97-10T12 GSM258631 CEL  
 96-Osteoblast-d21 GSM258740 CEL  
 95-Osteoblast-d21 GSM258739 CEL  
 94-Osteoblast-d14 GSM258738 CEL  
 93-Osteoblast-d14 GSM258737 CEL  
 92-Osteoblast-d5 GSM258742 CEL  
 91-Osteoblast-d5 GSM258741 CEL  
 90-Chondrocytes GSM266741 CEL  
 89-Nat\_Helper cell GSM465594 CEL  
 88-Nat\_Helper cell GSM465593 CEL  
 87-LT cell GSM465596 CEL  
 86-MS-1 GSM234692 CEL  
 85-Lymph-endo-cells GSM143704 CEL  
 84-PP-FDC GSM481977 CEL  
 83-PP-FDC GSM481978 CEL  
 82-PP-FDC GSM481976 CEL  
 81-LY-RMLND C003001 CEL  
 80-LY-RMLND C003001 CEL  
 79-Follicular-B cells GSM258664 CEL  
 78-Follicular-B cells GSM258663 CEL  
 77-MZ-Bcell GSM258627 CEL  
 76-MZ-Bcell GSM258627 CEL  
 75-BAF3 GSM258620 CEL  
 74-BAF3 GSM258619 CEL  
 73-Tregs GSM258778 CEL  
 72-Tregs GSM258777 CEL  
 71-T-cells-CD8+ GSM258776 CEL  
 70-T-cells-CD8+ GSM258774 CEL  
 69-T-cells-CD4+ GSM258773 CEL  
 68-T-cells-CD4+ GSM258773 CEL  
 67-Thymocyte-DN GSM465595 CEL  
 66-Osteoclasts GSM258743 CEL  
 65-Microglia GSM258721 CEL  
 64-Microglia GSM258721 CEL  
 63-PP-7h GSM258706 CEL  
 62-PP-7h GSM258706 CEL  
 61-PP-7h GSM258705 CEL  
 60-MM-LPS-6h GSM258702 CEL  
 59-MM-LPS-6h GSM258702 CEL  
 58-MM-LPS-6h GSM258699 CEL  
 57-MM-LPS-6h GSM258699 CEL  
 56-MM-LPS-6h GSM258694 CEL  
 55-MM-LPS-6h GSM258694 CEL  
 54-Plasmacytoid-DC GSM258650 CEL  
 53-Plasmacytoid-DC GSM258649 CEL  
 52-CD8a-DC GSM258647 CEL  
 51-CD8a-DC GSM258647 CEL  
 50-CD8a+DC GSM258646 CEL  
 49-CD8a+DC GSM258646 CEL  
 48-NK-cells GSM258732 CEL  
 47-NK-cells GSM258731 CEL  
 46-Mast-cells-IgE+Ad GSM258719 CEL  
 45-Mast-cells-IgE+Ad GSM258714 CEL  
 44-Mast-cells-IgE GSM258713 CEL  
 43-Mast-cells-IgE GSM258713 CEL  
 42-Mast-cells-IgE GSM258712 CEL  
 41-Mast-cells-IgE GSM258712 CEL  
 40-Granulocytes GSM258667 CEL  
 39-Granulocytes GSM258667 CEL  
 38-GMP GSM258666 CEL  
 37-GMP GSM258666 CEL  
 36-GMP GSM258666 CEL  
 35-GMP GSM258666 CEL  
 34-MEP GSM258642 CEL  
 33-MEP GSM258642 CEL  
 32-MEP GSM258642 CEL  
 31-HSC GSM258770 CEL  
 30-HSC GSM258770 CEL  
 29-Bone marrow GSM258628 CEL  
 28-Bone marrow GSM258627 CEL  
 27-paneth-cells-Gf-1 GSM116357 CEL  
 26-paneth-cells-Gf-1 GSM116350 CEL  
 25-paneth-cells-Gf-1 GSM116350 CEL  
 24-paneth-cells-Gf-1 GSM116350 CEL  
 23-paneth-cells-Gf-1 GSM116350 CEL  
 22-paneth-cells-Gf-1 GSM116350 CEL  
 21-Colon-Crypt GSM480375 cel  
 20-Colon-Crypt GSM480374 cel  
 19-Colon-Vill GSM480363 cel  
 18-Colon-Vill GSM480362 cel  
 17-Colon-IEC-Gf GSM349880 CEL  
 16-Colon-IEC-Gf GSM350375 CEL  
 15-Ileum-IEC-Gf GSM350376 CEL  
 14-Ileum-IEC GSM350371 CEL  
 13-Small-intestine-epithelium\_RMINEP002001 CEL  
 12-Small-intestine-epithelium\_RMINEP001001 CEL  
 11-FAE-RMPYEP002001 CEL  
 10-FAE-RMPYEP001001 CEL  
 09-Ileum-IEC GSM190797 CEL  
 08-Ileum-IEC GSM190796 CEL  
 07-Ileum-IEC GSM190795 CEL  
 06-CT-v-M-cells GSM190794 CEL  
 05-CT-v-M-cells GSM190793 CEL  
 04-CT-v-M-cells GSM190792 CEL  
 03-PP-M-cells GSM190791 CEL  
 02-PP-M-cells GSM190790 CEL  
 01-PP-M-cells GSM190789 CEL



Cluster0195\_House keeping (10 nodes)

6,773.3  
6,416.8  
6,060.3  
5,703.8  
5,347.3  
4,990.8  
4,634.3  
4,277.8  
3,921.4  
3,564.9  
3,208.4  
2,851.9  
2,495.4  
2,138.9  
1,782.4  
1,425.9  
1,069.5  
713  
356.5  
0

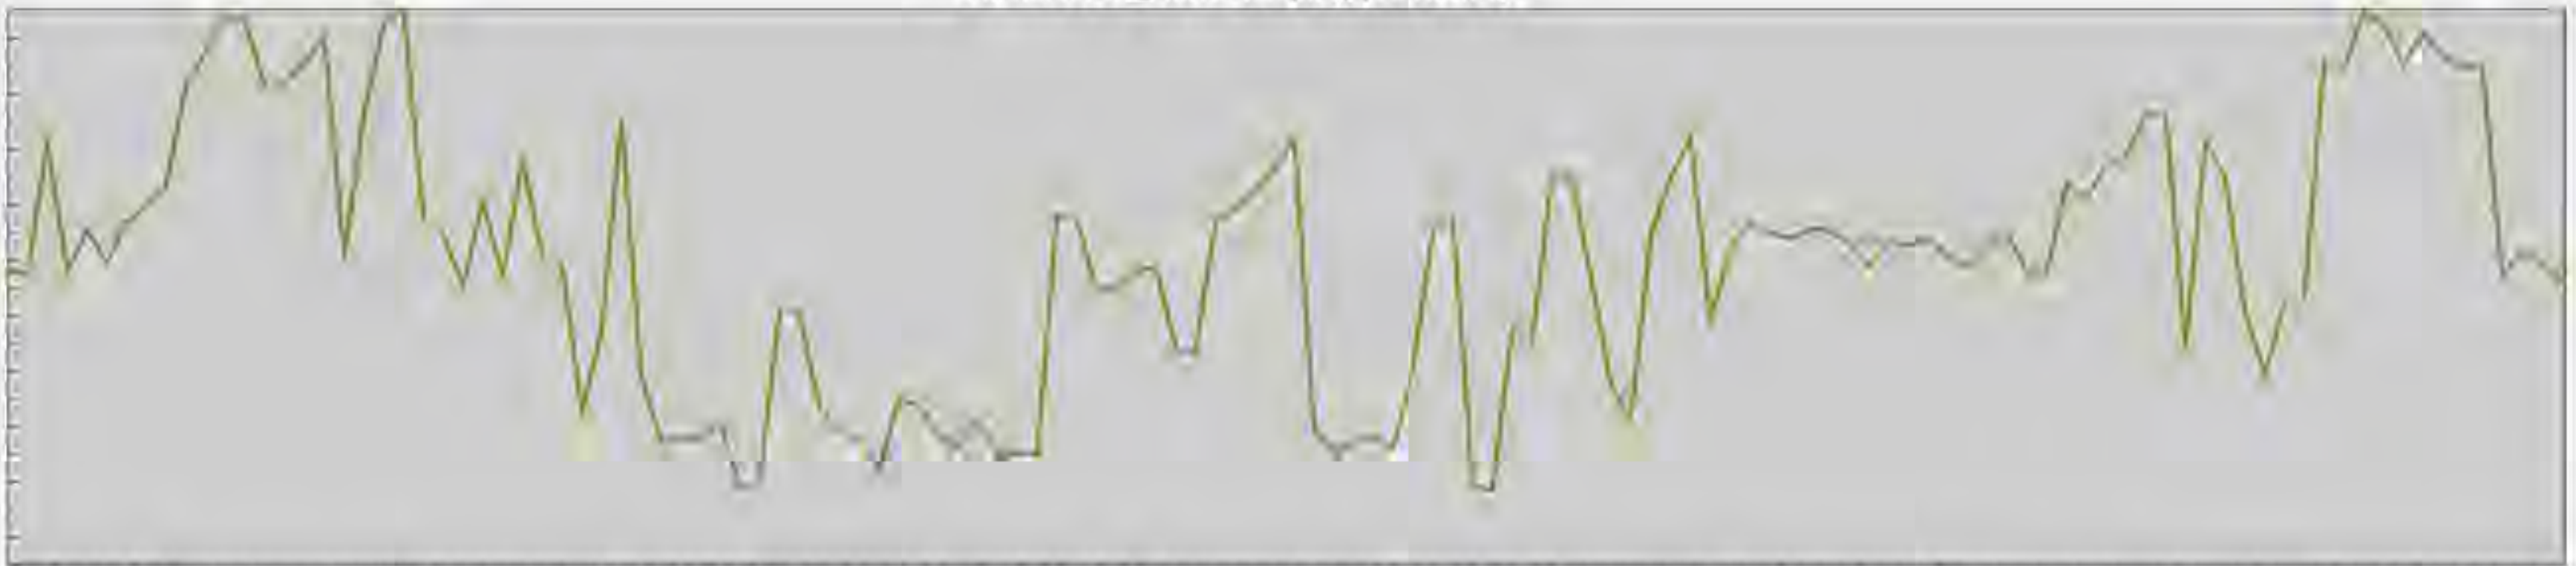

130- NALT GSM289411.CEL  
129- NALT GSM289410.CEL  
128- NALT GSM289409.CEL  
127- NALT GSM289408.CEL  
126- Colon-d9 GSM1988105.CEL  
125- Colon-d9 GSM1988104.CEL  
124- Colon-d9 GSM1988103.CEL  
123- Colon-d4 GSM1988102.CEL  
122- Colon-d4 GSM1988101.CEL  
121- Intestine-large GSM258676.CEL  
120- Intestine-large GSM258675.CEL  
119- Intestine-small GSM258678.CEL  
118- Intestine-small GSM258679.CEL  
117- Lymph-nodes GSM258691.CEL  
116- Lymph-nodes GSM258726.CEL  
115- Spleen GSM258767.CEL  
114- Spleen GSM258767.CEL  
113- Neuro2a GSM258728.CEL  
112- Neuro2a GSM258727.CEL  
111- Astrocytes GSM241898.CEL  
110- mimg GSM258726.CEL  
109- mimg GSM258725.CEL  
108- MIMCD3 GSM258724.CEL  
107- MIMCD3 GSM258723.CEL  
106- Bruce4 GSM258656.CEL  
105- Bruce4 GSM258656.CEL  
104- C2C12 GSM258690.CEL  
103- C2C12 GSM258629.CEL  
102- NIH3T3 GSM258739.CEL  
101- NIH3T3 GSM258739.CEL  
100- 3T3-L1 GSM258610.CEL  
99- 3T3-L1 GSM258609.CEL  
98- 10T12 GSM258632.CEL  
97- 10T12 GSM258631.CEL  
96- Osteoblast-d21 GSM258740.CEL  
95- Osteoblast-d21 GSM258739.CEL  
94- Osteoblast-d14 GSM258738.CEL  
93- Osteoblast-d14 GSM258737.CEL  
92- Osteoblast-d5 GSM258742.CEL  
91- Osteoblast-d5 GSM258741.CEL  
90- Chondrocytes GSM266741.CEL  
89- Chondrocytes GSM266740.CEL  
88- Nat Helper cell GSM465594.CEL  
87- Nat Helper cell GSM465593.CEL  
86- Tt cell GSM465596.CEL  
85- MS-1 GSM234692.CEL  
84- Lymph-endo-cells GSM143704.CEL  
83- PP-FDC GSM481977.CEL  
82- PP-FDC GSM481978.CEL  
81- PP-FDC GSM481976.CEL  
80- FLY RMLNDCC003001.CEL  
79- FLY RMLNDCC003001.CEL  
78- Follicular-Bcells GSM258664.CEL  
77- Follicular-Bcells GSM258664.CEL  
76- MZ-Bcell GSM258627.CEL  
75- MZ-Bcell GSM258627.CEL  
74- BAF3 GSM258620.CEL  
73- BAF3 GSM258619.CEL  
72- Tregs GSM258778.CEL  
71- Tregs GSM258777.CEL  
70- T-cells-CD8+ GSM258776.CEL  
69- T-cells-CD8+ GSM258775.CEL  
68- T-cells-CD4+ GSM258774.CEL  
67- T-cells-CD4+ GSM258773.CEL  
66- Thymocyte-DN GSM465595.CEL  
65- Osteoclasts GSM258743.CEL  
64- Microglia GSM258721.CEL  
63- Microglia GSM258721.CEL  
62- PMM-7h GSM258706.CEL  
61- PMM-7h GSM258706.CEL  
60- PMM-LPS-7h GSM268705.CEL  
59- PMM-LPS-6h GSM258702.CEL  
58- PMM-LPS-6h GSM258702.CEL  
57- BMM-LPS-6h GSM258699.CEL  
56- BMM-LPS-6h GSM258699.CEL  
55- BMM-LPS-6h GSM258699.CEL  
54- BMM-LPS-6h GSM258699.CEL  
53- BMM-LPS-6h GSM258699.CEL  
52- BMM-LPS-6h GSM258699.CEL  
51- BMM-LPS-6h GSM258699.CEL  
50- CD8a-DC GSM258647.CEL  
49- CD8a-DC GSM258647.CEL  
48- CD8a+DC GSM258646.CEL  
47- NK-cells GSM258732.CEL  
46- NK-cells GSM258732.CEL  
45- Mast-cells-IgE+Ad GSM258718.CEL  
44- Mast-cells-IgE+Ad GSM258717.CEL  
43- Mast-cells-IgE GSM258714.CEL  
42- Mast-cells-IgE GSM258713.CEL  
41- Mast-cells GSM258712.CEL  
40- Granulocytes GSM258668.CEL  
39- Granulocytes GSM258667.CEL  
38- GMP GSM258666.CEL  
37- GMP GSM258666.CEL  
36- GMP GSM258666.CEL  
35- CMP GSM258642.CEL  
34- CMP GSM258642.CEL  
33- MIEP GSM258720.CEL  
32- MIEP GSM258720.CEL  
31- HSC GSM258770.CEL  
30- HSC GSM258770.CEL  
29- Bone marrow GSM258628.CEL  
28- Bone marrow GSM258627.CEL  
27- Paneth-cells-GF-1 GSM116357.CEL  
26- Paneth-cells-GF-1 GSM116357.CEL  
25- Paneth-cells GSM116350.CEL  
24- Paneth-cells GSM116350.CEL  
23- Paneth-cells GSM318589.CEL  
22- Paneth-cells GSM318589.CEL  
21- Colon-Crypt GSM480375.CEL  
20- Colon-Crypt GSM480374.CEL  
19- Colon-Vill GSM480363.CEL  
18- Colon-Vill GSM480362.CEL  
17- Colon-IEC-GF GSM349880.CEL  
16- Colon-IEC-GF GSM350375.CEL  
15- Ileum-IEC-GF GSM350376.CEL  
14- Ileum-IEC GSM350371.CEL  
13- Small-intestine-epithelium RMINEP002901.CEL  
12- Small-intestine-epithelium RMINEP001001.CEL  
11- FAE RMPYEP002001.CEL  
10- FAE RMPYEP001001.CEL  
09- Ileum-IEC GSM190797.CEL  
08- Ileum-IEC GSM190796.CEL  
07- Ileum-IEC GSM190795.CEL  
06- CT-v-M-cells GSM190794.CEL  
05- CT-v-M-cells GSM190793.CEL  
04- CT-v-M-cells GSM190792.CEL  
03- PP-M-cells GSM190791.CEL  
02- PP-M-cells GSM190790.CEL  
01- PP-M-cells GSM190789.CEL



Cluster0196\_Mesenchyme-related/extracellular matrix (10 nodes)

4,787.7  
4,535.7  
4,283.7  
4,031.7  
3,779.7  
3,527.8  
3,275.8  
3,023.8  
2,771.8  
2,519.8  
2,267.8  
2,015.9  
1,763.9  
1,511.9  
1,259.9  
1,007.9  
755.9  
504  
252  
0

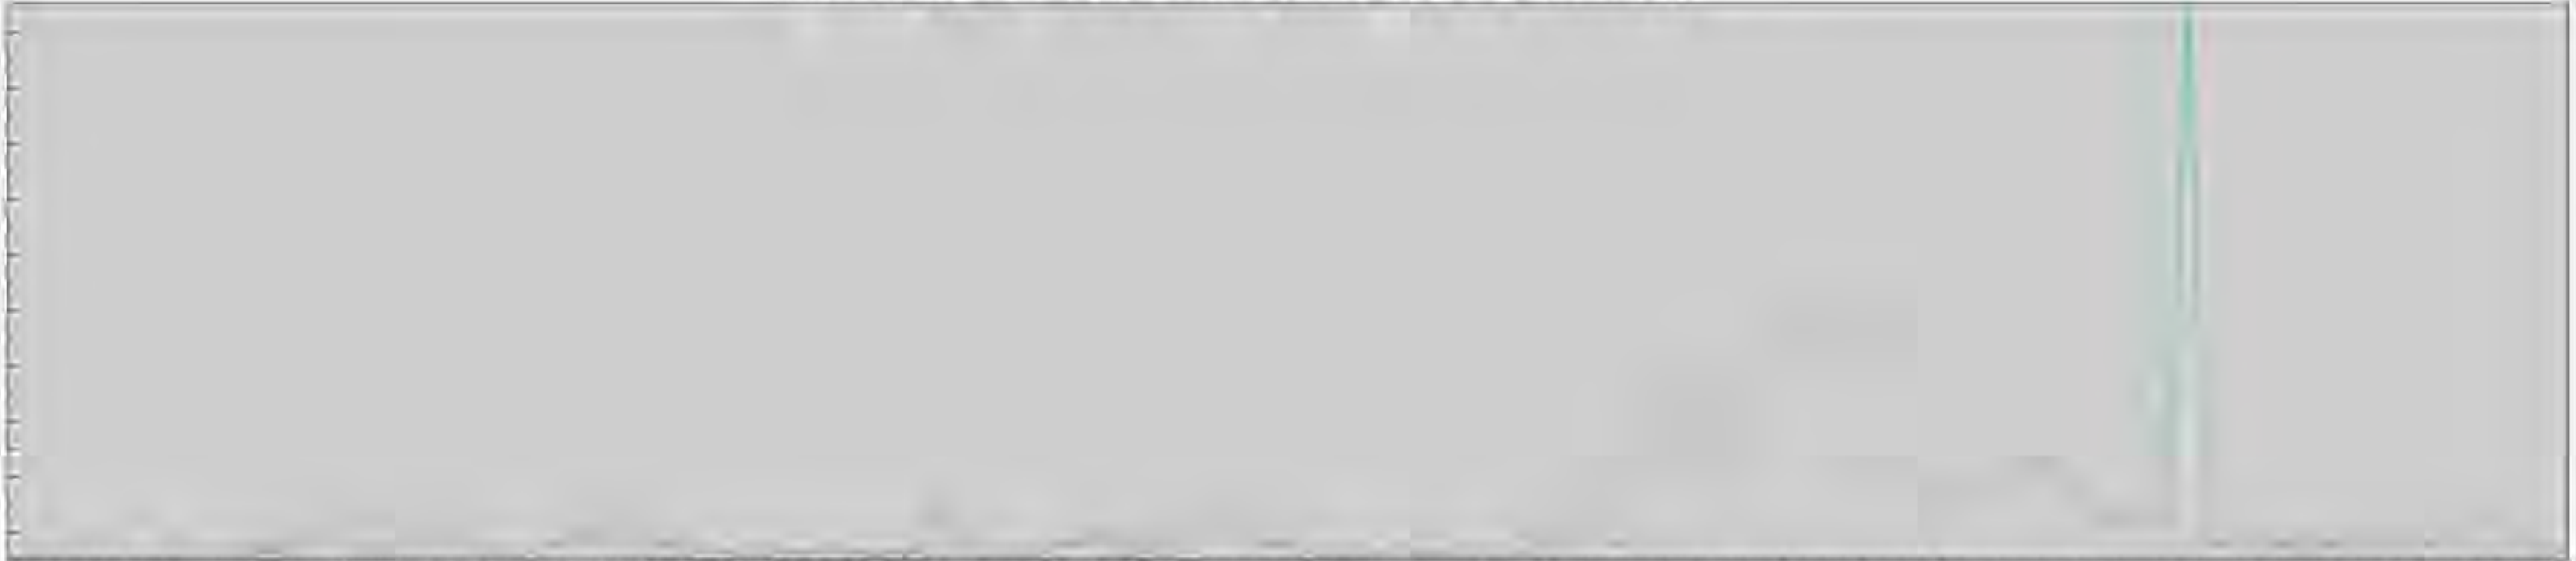

|     |                            |              |      |
|-----|----------------------------|--------------|------|
| 130 | NALT                       | GSM2899411   | CELL |
| 129 | NALT                       | GSM2899410   | CELL |
| 128 | NALT                       | GSM2899409   | CELL |
| 127 | NALT                       | GSM2899408   | CELL |
| 126 | Colon-d9                   | GSM1988105   | CELL |
| 125 | Colon-d9                   | GSM1988104   | CELL |
| 124 | Colon-d9                   | GSM1988103   | CELL |
| 123 | Colon-d4                   | GSM1988102   | CELL |
| 122 | Colon-d4                   | GSM1988101   | CELL |
| 121 | Intestine-large            | GSM258676    | CELL |
| 120 | Intestine-large            | GSM258675    | CELL |
| 119 | Intestine-small            | GSM258674    | CELL |
| 118 | Intestine-small            | GSM258673    | CELL |
| 117 | Lymph-nodes                | GSM258672    | CELL |
| 116 | Lymph-nodes                | GSM258671    | CELL |
| 115 | Spleen                     | GSM258670    | CELL |
| 114 | Spleen                     | GSM258669    | CELL |
| 113 | Neuro2a                    | GSM2418998   | CELL |
| 112 | Neuro2a                    | GSM2418997   | CELL |
| 111 | Astrocytes                 | GSM2418996   | CELL |
| 110 | mim6                       | GSM258726    | CELL |
| 109 | mim6                       | GSM258725    | CELL |
| 108 | MIMCD3                     | GSM258724    | CELL |
| 107 | MIMCD3                     | GSM258723    | CELL |
| 106 | Bruce4                     | GSM258666    | CELL |
| 105 | Bruce4                     | GSM258665    | CELL |
| 104 | C2C12                      | GSM258690    | CELL |
| 103 | C2C12                      | GSM258689    | CELL |
| 102 | NH3T3                      | GSM258730    | CELL |
| 101 | NH3T3                      | GSM258729    | CELL |
| 100 | 3T3-L1                     | GSM258610    | CELL |
| 99  | 3T3-L1                     | GSM258609    | CELL |
| 98  | 10T1/2                     | GSM258632    | CELL |
| 97  | 10T1/2                     | GSM258631    | CELL |
| 96  | Osteoblast-d21             | GSM258740    | CELL |
| 95  | Osteoblast-d21             | GSM258739    | CELL |
| 94  | Osteoblast-d14             | GSM258738    | CELL |
| 93  | Osteoblast-d14             | GSM258737    | CELL |
| 92  | Osteoblast-d5              | GSM258742    | CELL |
| 91  | Osteoblast-d5              | GSM258741    | CELL |
| 90  | Chondrocytes               | GSM266741    | CELL |
| 89  | Chondrocytes               | GSM266740    | CELL |
| 88  | Nat Helper cell            | GSM465594    | CELL |
| 87  | Nat Helper cell            | GSM465593    | CELL |
| 86  | Tt cell                    | GSM465596    | CELL |
| 85  | MS-1                       | GSM234692    | CELL |
| 84  | Lymph-endo-cells           | GSM143704    | CELL |
| 83  | PP-FDC                     | GSM481977    | CELL |
| 82  | PP-FDC                     | GSM481978    | CELL |
| 81  | PP-FDC                     | GSM481976    | CELL |
| 80  | E-L                        | RMLNDC003001 | CELL |
| 79  | E-L                        | RMLNDC003001 | CELL |
| 78  | Follicular-Bcells          | GSM258664    | CELL |
| 77  | Follicular-Bcells          | GSM258663    | CELL |
| 76  | MZ-Bcell                   | GSM258622    | CELL |
| 75  | MZ-Bcell                   | GSM258621    | CELL |
| 74  | BAF3                       | GSM258620    | CELL |
| 73  | BAF3                       | GSM258619    | CELL |
| 72  | Tregs                      | GSM258778    | CELL |
| 71  | Tregs                      | GSM258777    | CELL |
| 70  | T-cells-CD8+               | GSM258776    | CELL |
| 69  | T-cells-CD8+               | GSM258775    | CELL |
| 68  | T-cells-CD4+               | GSM258774    | CELL |
| 67  | T-cells-CD4+               | GSM258773    | CELL |
| 66  | Thymocyte-DN               | GSM465595    | CELL |
| 65  | Osteoclasts                | GSM258743    | CELL |
| 64  | Microglia                  | GSM258721    | CELL |
| 63  | Microglia                  | GSM258721    | CELL |
| 62  | MM-LPS-7h                  | GSM268706    | CELL |
| 61  | MM-LPS-7h                  | GSM268706    | CELL |
| 60  | MM-LPS-6h                  | GSM268700    | CELL |
| 59  | MM-LPS-6h                  | GSM268700    | CELL |
| 58  | MM-LPS-6h                  | GSM268699    | CELL |
| 57  | MM-LPS-6h                  | GSM268699    | CELL |
| 56  | MM-LPS-6h                  | GSM268699    | CELL |
| 55  | MM-LPS-6h                  | GSM268699    | CELL |
| 54  | MM-LPS-6h                  | GSM268699    | CELL |
| 53  | MM-LPS-6h                  | GSM268699    | CELL |
| 52  | MM-LPS-6h                  | GSM268699    | CELL |
| 51  | MM-LPS-6h                  | GSM268699    | CELL |
| 50  | CD8a-DC                    | GSM258647    | CELL |
| 49  | CD8a-DC                    | GSM258647    | CELL |
| 48  | CD8a+DC                    | GSM258646    | CELL |
| 47  | NK-cells                   | GSM258732    | CELL |
| 46  | NK-cells                   | GSM258731    | CELL |
| 45  | Mast-cells-IgE+Ad          | GSM258719    | CELL |
| 44  | Mast-cells-IgE+Ad          | GSM258719    | CELL |
| 43  | Mast-cells-IgE             | GSM258714    | CELL |
| 42  | Mast-cells-IgE             | GSM258713    | CELL |
| 41  | Mast-cells                 | GSM258712    | CELL |
| 40  | Granulocytes               | GSM258668    | CELL |
| 39  | Granulocytes               | GSM258667    | CELL |
| 38  | GMP                        | GSM258666    | CELL |
| 37  | GMP                        | GSM258665    | CELL |
| 36  | GMP                        | GSM258664    | CELL |
| 35  | GMP                        | GSM258642    | CELL |
| 34  | MPEP                       | GSM258720    | CELL |
| 33  | MPEP                       | GSM258719    | CELL |
| 32  | HESC                       | GSM258770    | CELL |
| 31  | HESC                       | GSM258770    | CELL |
| 30  | Bone marrow                | GSM258628    | CELL |
| 29  | Bone marrow                | GSM258627    | CELL |
| 28  | paneth-cells-GF            | GSM116358    | CELL |
| 27  | paneth-cells-GF            | GSM116357    | CELL |
| 26  | paneth-cells               | GSM116350    | CELL |
| 25  | paneth-cells               | GSM116350    | CELL |
| 24  | paneth-cells               | GSM116359    | CELL |
| 23  | paneth-cells               | GSM116359    | CELL |
| 22  | paneth-cells               | GSM116359    | CELL |
| 21  | Colon-Crypt                | GSM480375    | cel  |
| 20  | Colon-Crypt                | GSM480374    | cel  |
| 19  | Colon-Vill                 | GSM480363    | cel  |
| 18  | Colon-Vill                 | GSM480362    | cel  |
| 17  | Colon-IEC-Gf               | GSM349880    | CEL  |
| 16  | Colon-IEC-Gf               | GSM350375    | CEL  |
| 15  | ileum-IEC                  | GSM350376    | CEL  |
| 14  | ileum-IEC                  | GSM350371    | CEL  |
| 13  | Small-intestine-epithelium | RMINEP002901 | CEL  |
| 12  | Small-intestine-epithelium | RMINEP001001 | CEL  |
| 11  | FAE-RMP                    | P002001      | CEL  |
| 10  | FAE-RMP                    | P001001      | CEL  |
| 09  | ileum-IEC                  | GSM190797    | CELL |
| 08  | ileum-IEC                  | GSM190796    | CELL |
| 07  | ileum-IEC                  | GSM190795    | CELL |
| 06  | CT-v-M-cells               | GSM190794    | CELL |
| 05  | CT-v-M-cells               | GSM190793    | CELL |
| 04  | PP-M-cells                 | GSM190792    | CELL |
| 03  | PP-M-cells                 | GSM190791    | CELL |
| 02  | PP-M-cells                 | GSM190790    | CELL |
| 01  | PP-M-cells                 | GSM190789    | CELL |



Cluster0197\_Small intestine-related (10 nodes)

2,583.7  
2,447.7  
2,311.8  
2,175.8  
2,039.8  
1,903.8  
1,767.8  
1,631.8  
1,495.8  
1,359.9  
1,223.9  
1,087.9  
951.9  
815.9  
679.9  
543.9  
408  
272  
136  
0

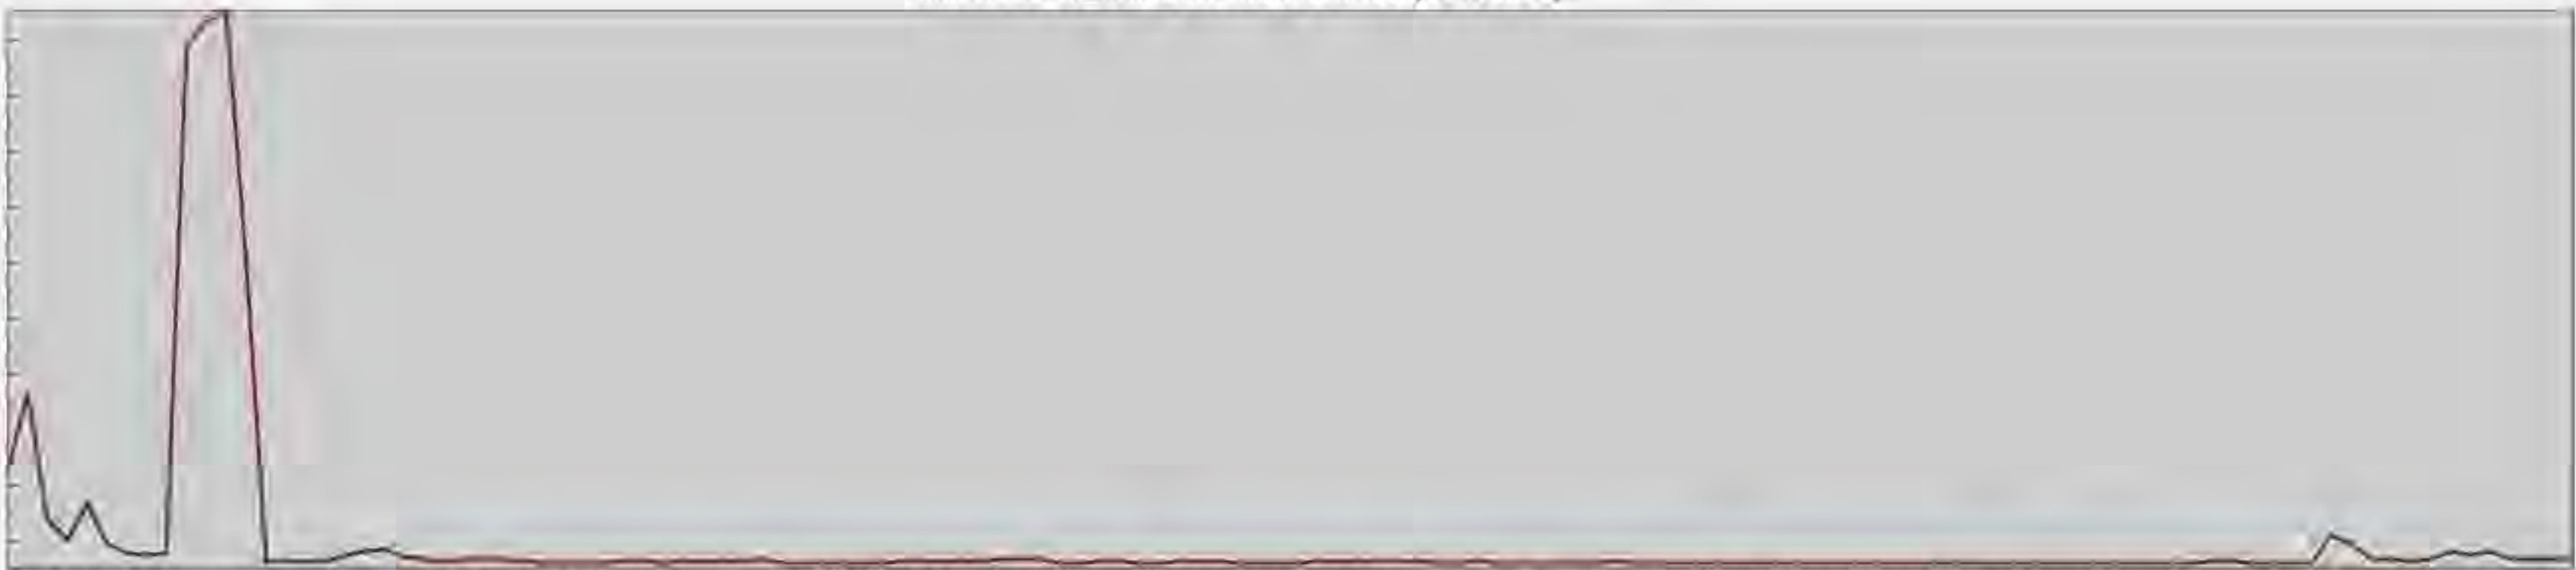

|                               |              |      |
|-------------------------------|--------------|------|
| 01-PP-M-cells                 | GSM190789    | CEL  |
| 02-PP-M-cells                 | GSM190790    | CEL  |
| 03-PP-M-cells                 | GSM190791    | CEL  |
| 04-CT-Y-M-cells               | GSM190792    | CEL  |
| 05-CT-Y-M-cells               | GSM190793    | CEL  |
| 06-CT-W-M-cells               | GSM190794    | CEL  |
| 07-Ileum-EC                   | GSM190795    | CEL  |
| 08-Ileum-EC                   | GSM190796    | CEL  |
| 09-Ileum-EC                   | GSM190797    | CEL  |
| 10-FAE-RMP                    | GSM190798    | CEL  |
| 11-FAE-RMP                    | GSM190799    | CEL  |
| 12-Small intestine-epithelium | RMINEP001001 | CEL  |
| 13-Small intestine-epithelium | RMINEP002001 | CEL  |
| 14-Ileum-EC                   | GSM350376    | CEL  |
| 15-Colon-EC                   | GSM350375    | CEL  |
| 16-Colon-VIII                 | GSM480362    | cel  |
| 17-Colon-VIII                 | GSM480363    | cel  |
| 18-Colon-VIII                 | GSM480364    | cel  |
| 19-Colon-Crypt                | GSM480374    | cel  |
| 20-Colon-Crypt                | GSM480375    | cel  |
| 21-Paneth-cells               | GSM318590    | CEL  |
| 22-Paneth-cells               | GSM318589    | CEL  |
| 23-Paneth-cells               | GSM318588    | CEL  |
| 24-Paneth-cells               | GSM116359    | CEL  |
| 25-Paneth-cells               | GSM116350    | CEL  |
| 26-Paneth-cells               | GSM116357    | CEL  |
| 27-Paneth-cells               | GSM116358    | CEL  |
| 28-Bone marrow                | GSM258627    | CEL  |
| 29-Bone marrow                | GSM258628    | CEL  |
| 30-NALT                       | GSM289411    | CELL |
| 31-NALT                       | GSM289410    | CELL |
| 32-NALT                       | GSM289409    | CELL |
| 33-NALT                       | GSM289408    | CELL |
| 34-Colon-d9                   | GSM198810    | CELL |
| 35-Colon-d9                   | GSM198811    | CELL |
| 36-Colon-d9                   | GSM198812    | CELL |
| 37-Colon-d4                   | GSM198813    | CELL |
| 38-Colon-d4                   | GSM198814    | CELL |
| 39-Colon-d4                   | GSM198815    | CELL |
| 40-Ileum-large                | GSM258675    | CEL  |
| 41-Ileum-large                | GSM258676    | CEL  |
| 42-Ileum-large                | GSM258677    | CEL  |
| 43-Ileum-small                | GSM258678    | CEL  |
| 44-Ileum-small                | GSM258679    | CEL  |
| 45-Lymph-nodes                | GSM258680    | CEL  |
| 46-Spleen                     | GSM258681    | CEL  |
| 47-Spleen                     | GSM258682    | CEL  |
| 48-Neuro2a                    | GSM241898    | CEL  |
| 49-Astrocytes                 | GSM241899    | CEL  |
| 50-mimb                       | GSM258725    | CELL |
| 51-mimb                       | GSM258726    | CELL |
| 52-mimb                       | GSM258727    | CELL |
| 53-MIMCD3                     | GSM258728    | CELL |
| 54-MIMCD3                     | GSM258729    | CELL |
| 55-MIMCD3                     | GSM258730    | CELL |
| 56-Bruce4                     | GSM258690    | CELL |
| 57-Bruce4                     | GSM258691    | CELL |
| 58-Bruce4                     | GSM258692    | CELL |
| 59-C2C12                      | GSM258693    | CELL |
| 60-C2C12                      | GSM258694    | CELL |
| 61-NH3T3                      | GSM258731    | CELL |
| 62-NH3T3                      | GSM258732    | CELL |
| 63-3T3-L1                     | GSM258610    | CELL |
| 64-3T3-L1                     | GSM258609    | CELL |
| 65-10T12                      | GSM258631    | CELL |
| 66-10T12                      | GSM258632    | CELL |
| 67-Osteoblast-d21             | GSM258740    | CELL |
| 68-Osteoblast-d21             | GSM258739    | CELL |
| 69-Osteoblast-d14             | GSM258738    | CELL |
| 70-Osteoblast-d14             | GSM258737    | CELL |
| 71-Osteoblast-d5              | GSM258742    | CELL |
| 72-Osteoblast-d5              | GSM258741    | CELL |
| 73-Chondrocytes               | GSM266741    | CELL |
| 74-Chondrocytes               | GSM266740    | CELL |
| 75-Nat Helper cell            | GSM465594    | CELL |
| 76-Nat Helper cell            | GSM465593    | CELL |
| 77-LT cell                    | GSM465596    | CELL |
| 78-MS-1                       | GSM234692    | CEL  |
| 79-Lymph-endo-cells           | GSM143704    | CEL  |
| 80-PP-FDC                     | GSM481977    | CEL  |
| 81-PP-FDC                     | GSM481978    | CEL  |
| 82-PP-FDC                     | GSM481979    | CEL  |
| 83-F-LY                       | RMLNDC002001 | CEL  |
| 84-F-LY                       | RMLNDC002001 | CEL  |
| 85-F-LY                       | RMLNDC002001 | CEL  |
| 86-Follicular-B-cells         | GSM258664    | CEL  |
| 87-Follicular-B-cells         | GSM258665    | CEL  |
| 88-MZ-Bcell                   | GSM258621    | CEL  |
| 89-MZ-Bcell                   | GSM258622    | CEL  |
| 90-BAF3                       | GSM258620    | CEL  |
| 91-BAF3                       | GSM258619    | CEL  |
| 92-Tregs                      | GSM258778    | CEL  |
| 93-Tregs                      | GSM258777    | CEL  |
| 94-T-cells-CD8+               | GSM258776    | CEL  |
| 95-T-cells-CD8+               | GSM258775    | CEL  |
| 96-T-cells-CD4+               | GSM258774    | CEL  |
| 97-T-cells-CD4+               | GSM258773    | CEL  |
| 98-Thymocyte-DN               | GSM465595    | CEL  |
| 99-Osteoclasts                | GSM258743    | CEL  |
| 100-Microglia                 | GSM258721    | CEL  |
| 101-PP-7h                     | GSM258706    | CEL  |
| 102-PP-7h                     | GSM258705    | CEL  |
| 103-PP-6h                     | GSM258702    | CEL  |
| 104-PP-6h                     | GSM258701    | CEL  |
| 105-BMM-LPS-6h                | GSM258699    | CEL  |
| 106-BMM-LPS-6h                | GSM258698    | CEL  |
| 107-BMM-LPS-6h                | GSM258697    | CEL  |
| 108-BMM-LPS-6h                | GSM258696    | CEL  |
| 109-BMM-LPS-6h                | GSM258695    | CEL  |
| 110-BMM-LPS-6h                | GSM258694    | CEL  |
| 111-Ismacryoid-DC             | GSM258650    | CEL  |
| 112-Ismacryoid-DC             | GSM258649    | CEL  |
| 113-CD8a-DC                   | GSM258647    | CEL  |
| 114-CD8a-DC                   | GSM258647    | CEL  |
| 115-CD8a+DC                   | GSM258646    | CEL  |
| 116-CD8a+DC                   | GSM258645    | CEL  |
| 117-NK-cells                  | GSM258732    | CEL  |
| 118-NK-cells                  | GSM258731    | CEL  |
| 119-Mast-cells-IgE+Ad         | GSM258719    | CEL  |
| 120-Mast-cells-IgE+Ad         | GSM258718    | CEL  |
| 121-Mast-cells-IgE            | GSM258714    | CEL  |
| 122-Mast-cells-IgE            | GSM258713    | CEL  |
| 123-Mast-cells-IgE            | GSM258712    | CEL  |
| 124-Mast-cells-IgE            | GSM258711    | CEL  |
| 125-Granulocytes              | GSM258667    | CEL  |
| 126-Granulocytes              | GSM258666    | CEL  |
| 127-GMP                       | GSM258665    | CEL  |
| 128-GMP                       | GSM258664    | CEL  |
| 129-GMP                       | GSM258642    | CEL  |
| 130-GMP                       | GSM258641    | CEL  |
| 131-MEP                       | GSM258720    | CEL  |
| 132-MEP                       | GSM258719    | CEL  |
| 133-HESC                      | GSM258770    | CEL  |
| 134-HESC                      | GSM258769    | CEL  |



Cluster0198\_Uncertain-low in many (10 nodes)

81.5  
77.2  
72.9  
68.7  
64.4  
60.1  
55.8  
51.5  
47.2  
42.9  
38.6  
34.3  
30  
25.7  
21.5  
17.2  
12.9  
8.6  
4.3  
0

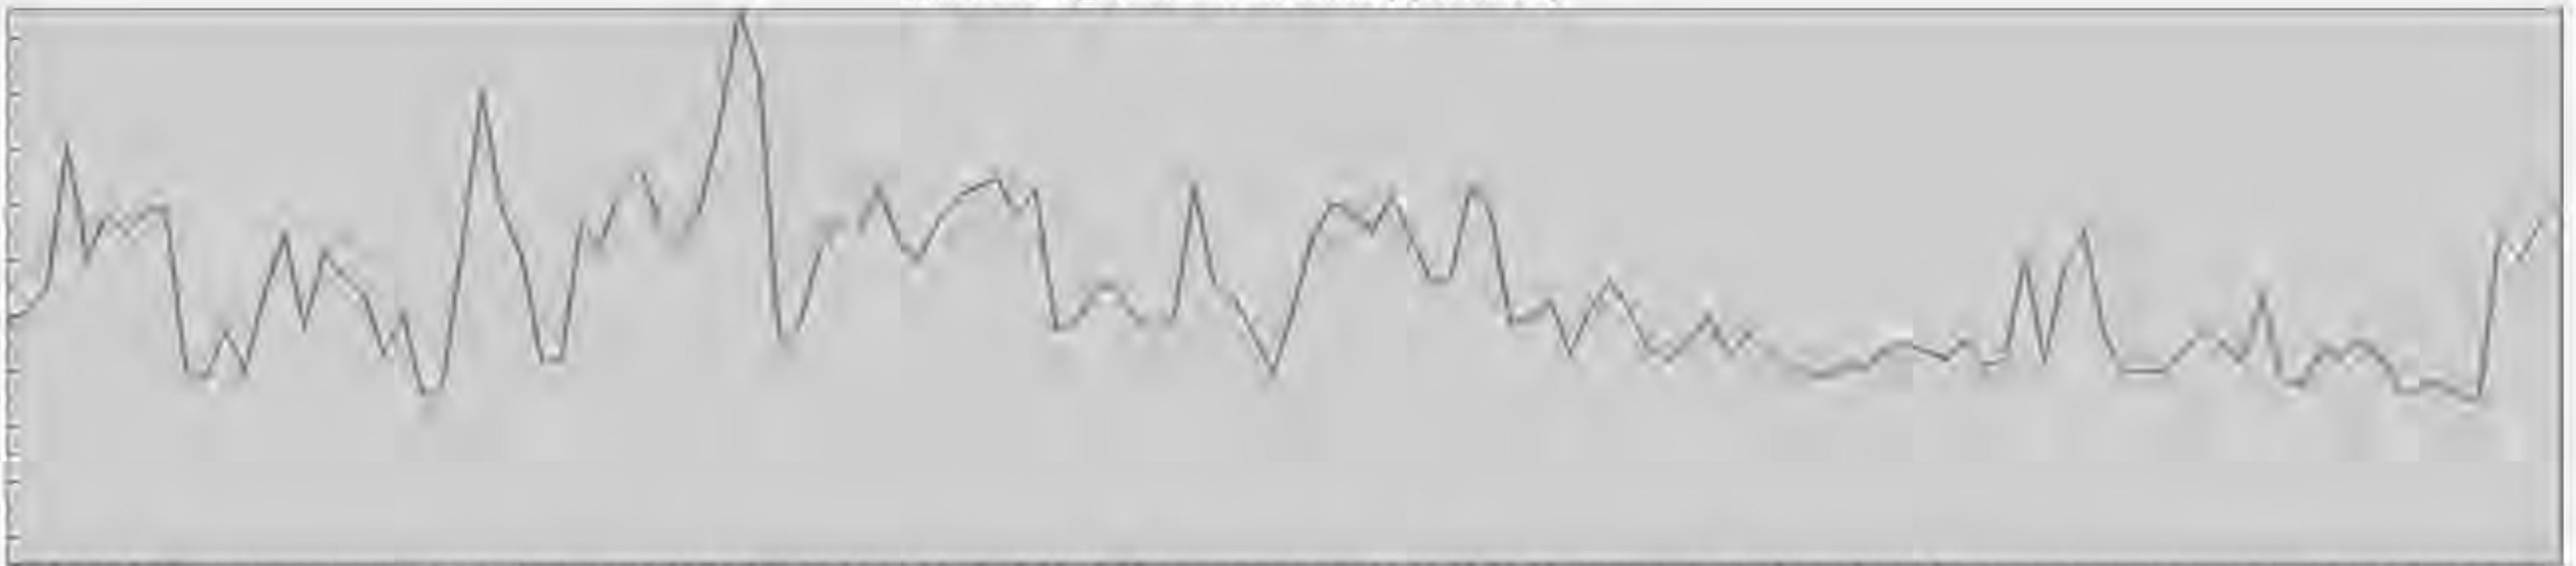

130- NALT GSM289411 CELL  
 129- NALT GSM289410 CELL  
 128- NALT GSM289409 CELL  
 127- NALT GSM289408 CELL  
 126- Colon-d9 GSM1988105 CELL  
 125- Colon-d9 GSM1988104 CELL  
 124- Colon-d9 GSM1988103 CELL  
 123- Colon-d4 GSM1988102 CELL  
 122- Colon-d4 GSM1988101 CELL  
 121- Intestine-large GSM258676 CELL  
 120- Intestine-large GSM258675 CELL  
 119- Intestine-small GSM258677 CELL  
 118- Intestine-small GSM258692 CELL  
 117- Lymph-nodes GSM258691 CELL  
 116- Lymph-nodes GSM258726 CELL  
 115- Spleen GSM258766 CELL  
 114- Spleen GSM258767 CELL  
 113- Neuro2a GSM258728 CELL  
 112- Neuro2a GSM241898 CELL  
 111- Astrocytes GSM241898 CELL  
 110- mimb GSM258725 CELL  
 109- mimb GSM258725 CELL  
 108- MIMCD3 GSM258723 CELL  
 107- MIMCD3 GSM258723 CELL  
 106- Bruce4 GSM258656 CELL  
 105- Bruce4 GSM258656 CELL  
 104- C2C12 GSM258690 CELL  
 103- C2C12 GSM258629 CELL  
 102- NH3T3 GSM258739 CELL  
 101- NH3T3 GSM258739 CELL  
 100- 3T3-L1 GSM258610 CELL  
 99- 3T3-L1 GSM258609 CELL  
 98- 10T12 GSM258632 CELL  
 97- 10T12 GSM258631 CELL  
 96- Osteoblast-d21 GSM258740 CELL  
 95- Osteoblast-d21 GSM258739 CELL  
 94- Osteoblast-d14 GSM258738 CELL  
 93- Osteoblast-d14 GSM258737 CELL  
 92- Osteoblast-d5 GSM258742 CELL  
 91- Osteoblast-d5 GSM258741 CELL  
 90- Chondrocytes GSM266741 CELL  
 89- Nat Helper cell GSM266740 CELL  
 88- Nat Helper cell GSM465594 CELL  
 87- Nat Helper cell GSM465593 CELL  
 86- Tt cell GSM465596 CELL  
 85- MS-1 GSM234692 CELL  
 84- Lymph-endo-cells GSM143704 CELL  
 83- PP-FDC GSM481977 CELL  
 82- PP-FDC GSM481978 CELL  
 81- PP-FDC GSM481976 CELL  
 80- E-L Y RMLNDCC003001 CELL  
 79- E-L Y RMLNDCC003001 CELL  
 78- Follicular-Bcells GSM258664 CELL  
 77- Follicular-Bcells GSM258664 CELL  
 76- MZ-Bcell GSM258627 CELL  
 75- MZ-Bcell GSM258627 CELL  
 74- BAF3 GSM258620 CELL  
 73- BAF3 GSM258619 CELL  
 72- Tregs GSM258778 CELL  
 71- Tregs GSM258778 CELL  
 70- T-cells-CD8+ GSM258776 CELL  
 69- T-cells-CD8+ GSM258774 CELL  
 68- T-cells-CD4+ GSM258773 CELL  
 67- T-cells-CD4+ GSM258743 CELL  
 66- Thymocyte-DN GSM465595 CELL  
 65- Osteoclasts GSM258743 CELL  
 64- Microglia GSM258721 CELL  
 63- Microglia GSM258721 CELL  
 62- MM-LPS-7h GSM258706 CELL  
 61- MM-LPS-7h GSM258706 CELL  
 60- MM-LPS-6h GSM258702 CELL  
 59- MM-LPS-6h GSM258702 CELL  
 58- MM-LPS-6h GSM258699 CELL  
 57- MM-LPS-6h GSM258699 CELL  
 56- MM-LPS-6h GSM258694 CELL  
 55- MM-LPS-6h GSM258694 CELL  
 54- Plasmacytoid-DC GSM258650 CELL  
 53- Plasmacytoid-DC GSM258649 CELL  
 52- CD8a-DC GSM258647 CELL  
 51- CD8a-DC GSM258647 CELL  
 50- CD8a+DC GSM258646 CELL  
 49- CD8a+DC GSM258646 CELL  
 48- NK-cells GSM258732 CELL  
 47- NK-cells GSM258732 CELL  
 46- Mast-cells-IgE+Ad GSM258719 CELL  
 45- Mast-cells-IgE+Ad GSM258719 CELL  
 44- Mast-cells-IgE GSM258714 CELL  
 43- Mast-cells-IgE GSM258713 CELL  
 42- Mast-cells-IgE GSM258712 CELL  
 41- Mast-cells GSM258712 CELL  
 40- Granulocytes GSM258667 CELL  
 39- Granulocytes GSM258667 CELL  
 38- GMP GSM258666 CELL  
 37- GMP GSM258666 CELL  
 36- GMP GSM258666 CELL  
 35- CMP GSM258642 CELL  
 34- CMP GSM258642 CELL  
 33- MIEP GSM258720 CELL  
 32- MIEP GSM258720 CELL  
 31- HSC GSM258770 CELL  
 30- HSC GSM258770 CELL  
 29- Bone marrow GSM258628 CELL  
 28- Bone marrow GSM258627 CELL  
 27- Paneth-cells-GF-1 GSM116357 CELL  
 26- Paneth-cells-GF-1 GSM116357 CELL  
 25- Paneth-cells GSM116350 CELL  
 24- Paneth-cells GSM116359 CELL  
 23- Paneth-cells GSM318589 CELL  
 22- Paneth-cells GSM318590 CELL  
 21- Colon-Crypt GSM480375 cel  
 20- Colon-Crypt GSM480374 cel  
 19- Colon-Vill GSM480363 cel  
 18- Colon-Vill GSM480362 cel  
 17- Colon-IEC-GF GSM349880 CELL  
 16- Colon-IEC-GF GSM350375 CELL  
 15- Ileum-IEC-GF GSM350376 CELL  
 14- Ileum-IEC GSM350371 CELL  
 13- Small-intestine-epithelium RMINEP002901 CELL  
 12- Small-intestine-epithelium RMINEP001001 CELL  
 11- FAE-RMPYEP002001 CELL  
 10- FAE-RMPYEP001001 CELL  
 09- Ileum-IEC GSM190797 CELL  
 08- Ileum-IEC GSM190796 CELL  
 07- Ileum-IEC GSM190795 CELL  
 06- CT-v-M-cells GSM190794 CELL  
 05- CT-v-M-cells GSM190793 CELL  
 04- CT-v-M-cells GSM190792 CELL  
 03- PP-M-cells GSM190791 CELL  
 02- PP-M-cells GSM190790 CELL  
 01- PP-M-cells GSM190789 CELL



## Cluster0199\_Uncertain (10 nodes)

2,090.4  
1,980.4  
1,870.4  
1,760.3  
1,650.3  
1,540.3  
1,430.3  
1,320.3  
1,210.2  
1,100.2  
990.2  
880.2  
770.1  
660.1  
550.1  
440.1  
330.1  
220  
110  
0

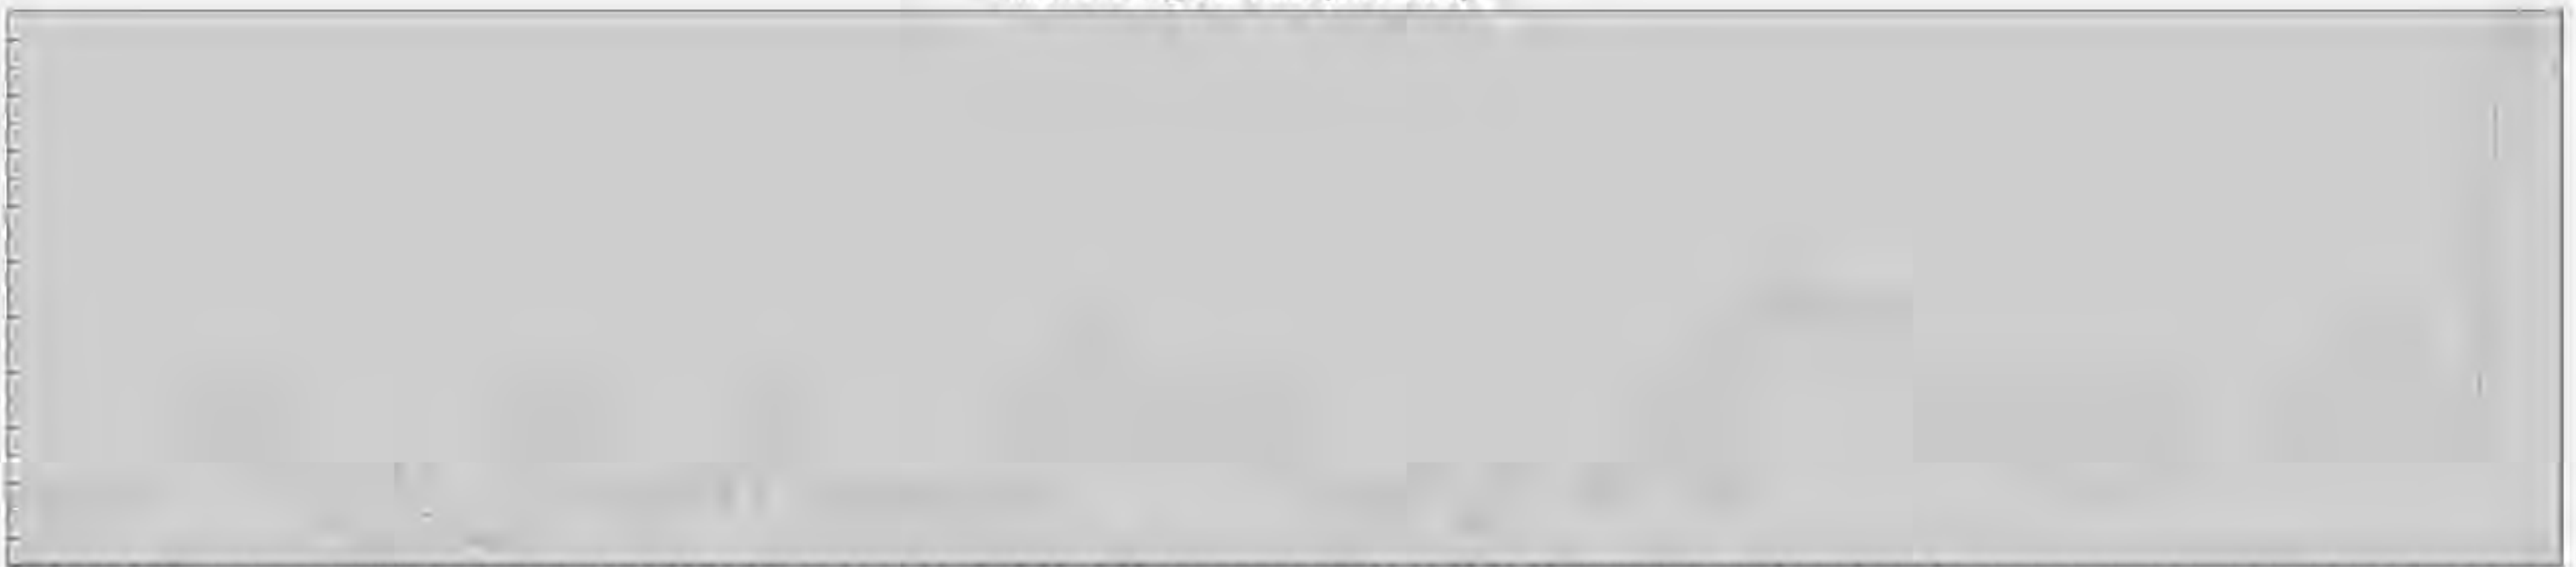

130-NALT GSM289411 CEL  
129-NALT GSM289410 CEL  
128-NALT GSM289409 CEL  
127-NALT GSM289408 CEL  
126-Colon-d9 GSM1988105 CEL  
125-Colon-d9 GSM1988104 CEL  
124-Colon-d9 GSM1988103 CEL  
123-Colon-d4 GSM1988102 CEL  
122-Colon-d4 GSM1988101 CEL  
121-Intestine-large GSM258676 CEL  
120-Intestine-large GSM258675 CEL  
119-Intestine-small GSM258678 CEL  
118-Intestine-small GSM258677 CEL  
117-Lymph-nodes GSM258691 CEL  
116-Lymph-nodes GSM258726 CEL  
115-Spleen GSM258767 CEL  
114-Spleen GSM258767 CEL  
113-Neuro2a GSM258728 CEL  
112-Neuro2a GSM258727 CEL  
111-Astrocytes GSM241898 CEL  
110-mimb GSM258726 CEL  
109-mimb GSM258725 CEL  
108-MIMCD3 GSM258724 CEL  
107-MIMCD3 GSM258723 CEL  
106-Bruce4 GSM258656 CEL  
105-Bruce4 GSM258655 CEL  
104-C2C12 GSM258690 CEL  
103-C2C12 GSM258689 CEL  
102-NH3T3 GSM258730 CEL  
101-NH3T3 GSM258729 CEL  
100-3T3-L1 GSM258610 CEL  
99-3T3-L1 GSM258609 CEL  
98-10T12 GSM258632 CEL  
97-10T12 GSM258631 CEL  
96-Osteoblast-d21 GSM258740 CEL  
95-Osteoblast-d21 GSM258739 CEL  
94-Osteoblast-d14 GSM258738 CEL  
93-Osteoblast-d14 GSM258737 CEL  
92-Osteoblast-d5 GSM258742 CEL  
91-Osteoblast-d5 GSM258741 CEL  
90-Chondrocytes GSM266741 CEL  
89-Chondrocytes GSM266740 CEL  
88-Nat Helper cell GSM465594 CEL  
87-Nat Helper cell GSM465593 CEL  
86-TT cell GSM465596 CEL  
85-MS-1 GSM234692 CEL  
84-Lymph-endo-cells GSM143704 CEL  
83-PP-FDC GSM481977 CEL  
82-PP-FDC GSM481978 CEL  
81-PP-FDC GSM481976 CEL  
80-F-LY RMLNDCC003001 CEL  
79-F-LY RMLNDCC003001 CEL  
78-Follicular-Bcells GSM258664 CEL  
77-Follicular-Bcells GSM258663 CEL  
76-MZ-Bcell GSM258627 CEL  
75-MZ-Bcell GSM258627 CEL  
74-BAF3 GSM258620 CEL  
73-BAF3 GSM258619 CEL  
72-Tregs GSM258778 CEL  
71-Tregs GSM258777 CEL  
70-T-cells-CD8+ GSM258776 CEL  
69-T-cells-CD8+ GSM258774 CEL  
68-T-cells-CD4+ GSM258773 CEL  
67-T-cells-CD4+ GSM258773 CEL  
66-Thymocyte-DN GSM465595 CEL  
65-Osteoclasts GSM258743 CEL  
64-Osteoclasts GSM258743 CEL  
63-Microglia GSM258721 CEL  
62-Microglia GSM258721 CEL  
61-PM-M-PS-7h GSM258706 CEL  
60-PM-M-PS-7h GSM258706 CEL  
59-PM-M-PS-6h GSM258702 CEL  
58-PM-M-PS-6h GSM258702 CEL  
57-BMM-LPS-6h GSM258699 CEL  
56-BMM-LPS-6h GSM258699 CEL  
55-BMM-LPS-6h GSM258699 CEL  
54-BMM-LPS-6h GSM258699 CEL  
53-Plasmacytoid-DC GSM258650 CEL  
52-Plasmacytoid-DC GSM258649 CEL  
51-CD8a-DC GSM258648 CEL  
50-CD8a-DC GSM258647 CEL  
49-CD8a+DC GSM258646 CEL  
48-CD8a+DC GSM258646 CEL  
47-NK-cells GSM258737 CEL  
46-NK-cells GSM258737 CEL  
45-Mast-cells-IgE+Ad GSM258719 CEL  
44-Mast-cells-IgE+Ad GSM258717 CEL  
43-Mast-cells-IgE GSM258714 CEL  
42-Mast-cells-IgE GSM258713 CEL  
41-Mast-cells GSM258712 CEL  
40-Granulocytes GSM258668 CEL  
39-Granulocytes GSM258667 CEL  
38-GMP GSM258666 CEL  
37-GMP GSM258666 CEL  
36-GMP GSM258666 CEL  
35-GMP GSM258642 CEL  
34-GMP GSM258642 CEL  
33-MEP GSM258720 CEL  
32-MEP GSM258719 CEL  
31-HESC GSM258770 CEL  
30-HESC GSM258770 CEL  
29-Bone marrow GSM258628 CEL  
28-Bone marrow GSM258627 CEL  
27-paneth-cells-GE GSM116358 CEL  
26-paneth-cells-GE GSM116357 CEL  
25-paneth-cells GSM116350 CEL  
24-paneth-cells GSM116359 CEL  
23-paneth-cells GSM318589 CEL  
22-paneth-cells GSM318590 CEL  
21-paneth-cells GSM480375 cel  
20-paneth-cells GSM480375 cel  
19-paneth-cells GSM480363 cel  
18-paneth-cells GSM480362 cel  
17-paneth-cells GSM349880 CEL  
16-paneth-cells GSM350375 CEL  
15-paneth-cells GSM350376 CEL  
14-paneth-cells GSM350371 CEL  
13-paneth-cells GSM350371 CEL  
13-paneth-cells GSM350371 CEL  
12-paneth-cells GSM350371 CEL  
11-paneth-cells GSM350371 CEL  
11-paneth-cells GSM350371 CEL  
10-paneth-cells GSM350371 CEL  
9-paneth-cells GSM350371 CEL  
8-paneth-cells GSM350371 CEL  
7-paneth-cells GSM350371 CEL  
6-paneth-cells GSM350371 CEL  
5-paneth-cells GSM350371 CEL  
4-paneth-cells GSM350371 CEL  
3-paneth-cells GSM350371 CEL  
2-paneth-cells GSM350371 CEL  
1-paneth-cells GSM350371 CEL



Cluster0200\_Uncertain (10 nodes)

704  
667  
629.9  
592.9  
555.8  
518.8  
481.7  
444.6  
407.6  
370.5  
333.5  
296.4  
259.4  
222.3  
185.3  
148.2  
111.2  
74.1  
37.1  
0

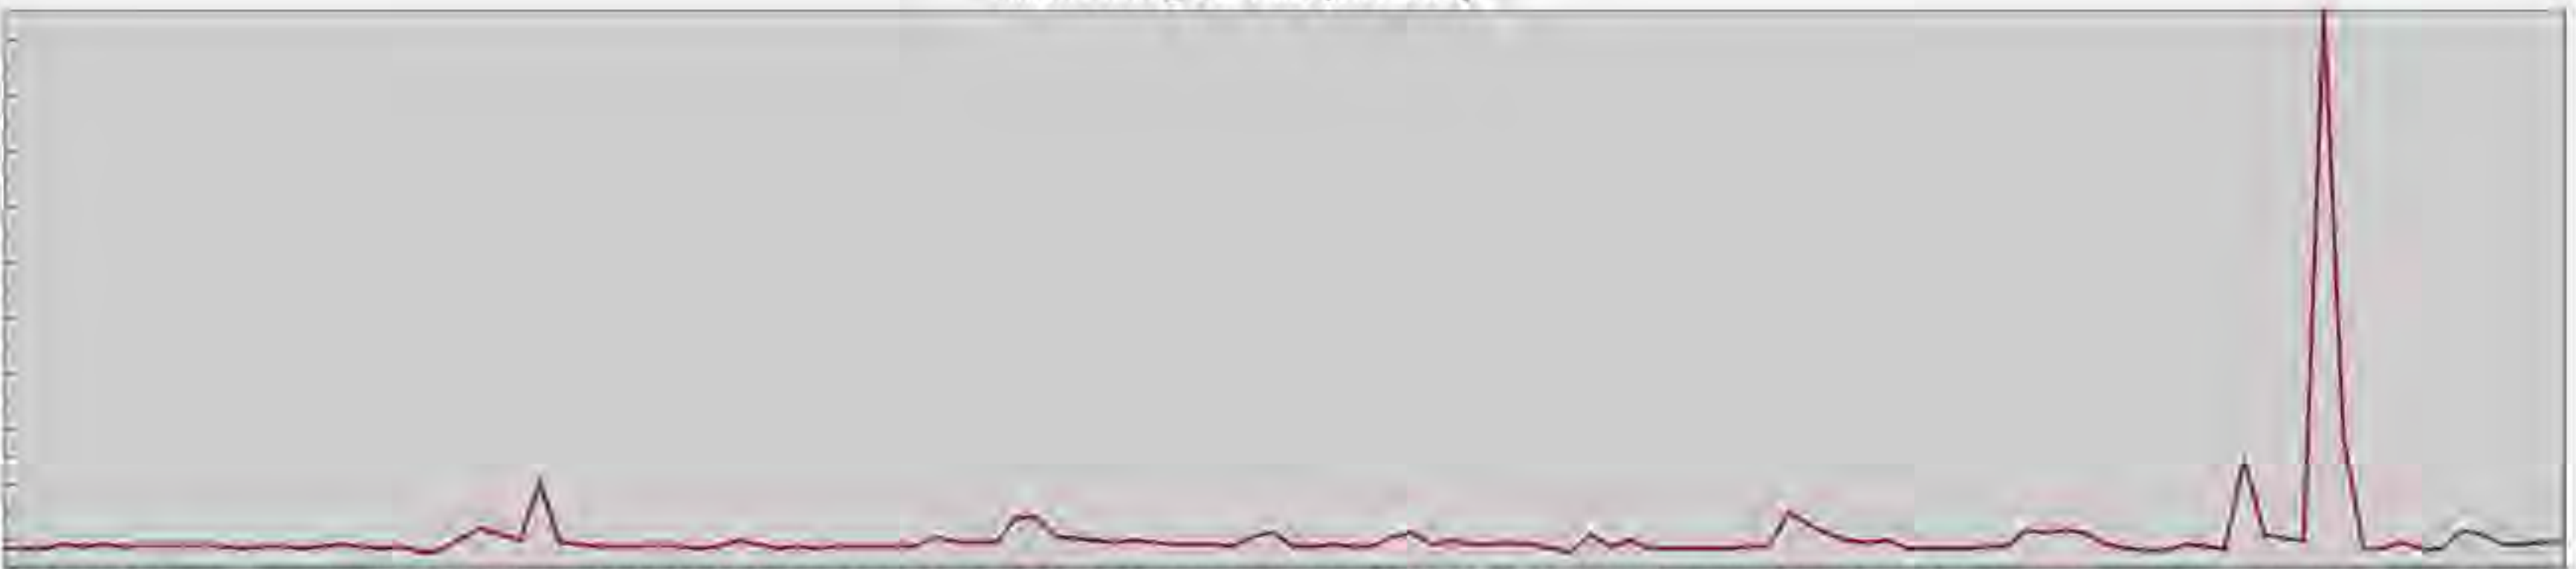

01-PP-M-cells\_GSM190789.CEL  
02-PP-M-cells\_GSM190790.CEL  
03-PP-M-cells\_GSM190791.CEL  
04-CT-Y-M-cells\_GSM190792.CEL  
05-CT-Y-M-cells\_GSM190793.CEL  
06-CT-W-M-cells\_GSM190794.CEL  
07-Ileum-IEC\_GSM190795.CEL  
08-Ileum-IEC\_GSM190796.CEL  
09-Ileum-IEC\_GSM190797.CEL  
10-FAE-RMPYEP001001.CEL  
11-FAE-RMPYEP002001.CEL  
12-Small-intestine-epithelium\_RMINEP001001.CEL  
13-Small-intestine-epithelium\_RMINEP002001.CEL  
14-Ileum-IEC\_GSM350371.CEL  
15-Ileum-IEC\_GSM350375.CEL  
16-Colon-IEC-Gf\_GSM349880.CEL  
17-Colon-VIII\_GSM480362.CEL  
18-Colon-VIII\_GSM480363.CEL  
19-Colon-VIII\_GSM480364.CEL  
20-Colon-Crypt\_GSM480374.CEL  
21-Colon-Crypt\_GSM480375.CEL  
22-Paneth-cells\_GSM318590.CEL  
23-Paneth-cells\_GSM318589.CEL  
24-Paneth-cells\_GSM116359.CEL  
25-Paneth-cells\_GSM116350.CEL  
26-Paneth-cells-Gf-1\_GSM116357.CEL  
27-Paneth-cells-Gf-1\_GSM116358.CEL  
28-Bone marrow\_GSM258627.CEL  
29-Bone marrow\_GSM258627.CEL  
30-NALT\_GSM289411.CEL  
31-NALT\_GSM289410.CEL  
32-NALT\_GSM289409.CEL  
33-NALT\_GSM289408.CEL  
34-Colon-d9\_GSM1988104.CEL  
35-Colon-d9\_GSM1988103.CEL  
36-Colon-d4\_GSM1988102.CEL  
37-Colon-d4\_GSM1988101.CEL  
38-Intestine-large\_GSM258676.CEL  
39-Intestine-large\_GSM258677.CEL  
40-Intestine-small\_GSM258692.CEL  
41-Intestine-small\_GSM258691.CEL  
42-Lymph-nodes\_GSM258725.CEL  
43-Spleen\_GSM258726.CEL  
44-Spleen\_GSM258727.CEL  
45-Neuro2a\_GSM241898.CEL  
46-Neuro2a\_GSM241899.CEL  
47-Astrocytes\_GSM241898.CEL  
48-mim6\_GSM258725.CEL  
49-mim6\_GSM258726.CEL  
50-mim6\_GSM258727.CEL  
51-MIMCD3\_GSM258723.CEL  
52-MIMCD3\_GSM258724.CEL  
53-Bruce4\_GSM258690.CEL  
54-Bruce4\_GSM258691.CEL  
55-C2C12\_GSM258629.CEL  
56-NH3T3\_GSM258730.CEL  
57-NH3T3\_GSM258731.CEL  
58-3T3-L1\_GSM258610.CEL  
59-3T3-L1\_GSM258609.CEL  
60-10T12\_GSM258632.CEL  
61-10T12\_GSM258631.CEL  
62-Osteoblast-d21\_GSM258740.CEL  
63-Osteoblast-d21\_GSM258739.CEL  
64-Osteoblast-d14\_GSM258738.CEL  
65-Osteoblast-d14\_GSM258737.CEL  
66-Osteoblast-d5\_GSM258742.CEL  
67-Osteoblast-d5\_GSM258741.CEL  
68-Chondrocytes\_GSM266741.CEL  
69-Chondrocytes\_GSM266740.CEL  
70-Nat Helper cell\_GSM465594.CEL  
71-Nat Helper cell\_GSM465593.CEL  
72-MS-1\_GSM234692.CEL  
73-Lymph-endo-cells\_GSM143704.CEL  
74-Lymph-endo-cells\_GSM481977.CEL  
75-Lymph-endo-cells\_GSM481978.CEL  
76-Lymph-endo-cells\_GSM481979.CEL  
77-Lymph-endo-cells\_GSM481976.CEL  
78-Lymph-endo-cells\_GSM481977.CEL  
79-Lymph-endo-cells\_GSM481978.CEL  
80-Lymph-endo-cells\_GSM481979.CEL  
81-Lymph-endo-cells\_GSM481976.CEL  
82-Lymph-endo-cells\_GSM481977.CEL  
83-Lymph-endo-cells\_GSM481978.CEL  
84-Lymph-endo-cells\_GSM481979.CEL  
85-Lymph-endo-cells\_GSM481976.CEL  
86-Lymph-endo-cells\_GSM481977.CEL  
87-Lymph-endo-cells\_GSM481978.CEL  
88-Lymph-endo-cells\_GSM481979.CEL  
89-Lymph-endo-cells\_GSM481976.CEL  
90-Lymph-endo-cells\_GSM481977.CEL  
91-Lymph-endo-cells\_GSM481978.CEL  
92-Lymph-endo-cells\_GSM481979.CEL  
93-Lymph-endo-cells\_GSM481976.CEL  
94-Lymph-endo-cells\_GSM481977.CEL  
95-Lymph-endo-cells\_GSM481978.CEL  
96-Lymph-endo-cells\_GSM481979.CEL  
97-Lymph-endo-cells\_GSM481976.CEL  
98-Lymph-endo-cells\_GSM481977.CEL  
99-Lymph-endo-cells\_GSM481978.CEL  
100-Lymph-endo-cells\_GSM481979.CEL  
101-Lymph-endo-cells\_GSM481976.CEL  
102-Lymph-endo-cells\_GSM481977.CEL  
103-Lymph-endo-cells\_GSM481978.CEL  
104-Lymph-endo-cells\_GSM481979.CEL  
105-Lymph-endo-cells\_GSM481976.CEL  
106-Lymph-endo-cells\_GSM481977.CEL  
107-Lymph-endo-cells\_GSM481978.CEL  
108-Lymph-endo-cells\_GSM481979.CEL  
109-Lymph-endo-cells\_GSM481976.CEL  
110-Lymph-endo-cells\_GSM481977.CEL  
111-Lymph-endo-cells\_GSM481978.CEL  
112-Lymph-endo-cells\_GSM481979.CEL  
113-Lymph-endo-cells\_GSM481976.CEL  
114-Lymph-endo-cells\_GSM481977.CEL  
115-Lymph-endo-cells\_GSM481978.CEL  
116-Lymph-endo-cells\_GSM481979.CEL  
117-Lymph-endo-cells\_GSM481976.CEL  
118-Lymph-endo-cells\_GSM481977.CEL  
119-Lymph-endo-cells\_GSM481978.CEL  
120-Lymph-endo-cells\_GSM481979.CEL  
121-Lymph-endo-cells\_GSM481976.CEL  
122-Lymph-endo-cells\_GSM481977.CEL  
123-Lymph-endo-cells\_GSM481978.CEL  
124-Lymph-endo-cells\_GSM481979.CEL  
125-Lymph-endo-cells\_GSM481976.CEL  
126-Lymph-endo-cells\_GSM481977.CEL  
127-Lymph-endo-cells\_GSM481978.CEL  
128-Lymph-endo-cells\_GSM481979.CEL  
129-Lymph-endo-cells\_GSM481976.CEL  
130-Lymph-endo-cells\_GSM481977.CEL  
131-Lymph-endo-cells\_GSM481978.CEL  
132-Lymph-endo-cells\_GSM481979.CEL  
133-Lymph-endo-cells\_GSM481976.CEL  
134-Lymph-endo-cells\_GSM481977.CEL  
135-Lymph-endo-cells\_GSM481978.CEL  
136-Lymph-endo-cells\_GSM481979.CEL  
137-Lymph-endo-cells\_GSM481976.CEL  
138-Lymph-endo-cells\_GSM481977.CEL  
139-Lymph-endo-cells\_GSM481978.CEL  
140-Lymph-endo-cells\_GSM481979.CEL  
141-Lymph-endo-cells\_GSM481976.CEL  
142-Lymph-endo-cells\_GSM481977.CEL  
143-Lymph-endo-cells\_GSM481978.CEL  
144-Lymph-endo-cells\_GSM481979.CEL  
145-Lymph-endo-cells\_GSM481976.CEL  
146-Lymph-endo-cells\_GSM481977.CEL  
147-Lymph-endo-cells\_GSM481978.CEL  
148-Lymph-endo-cells\_GSM481979.CEL  
149-Lymph-endo-cells\_GSM481976.CEL  
150-Lymph-endo-cells\_GSM481977.CEL  
151-Lymph-endo-cells\_GSM481978.CEL  
152-Lymph-endo-cells\_GSM481979.CEL  
153-Lymph-endo-cells\_GSM481976.CEL  
154-Lymph-endo-cells\_GSM481977.CEL  
155-Lymph-endo-cells\_GSM481978.CEL  
156-Lymph-endo-cells\_GSM481979.CEL  
157-Lymph-endo-cells\_GSM481976.CEL  
158-Lymph-endo-cells\_GSM481977.CEL  
159-Lymph-endo-cells\_GSM481978.CEL  
160-Lymph-endo-cells\_GSM481979.CEL  
161-Lymph-endo-cells\_GSM481976.CEL  
162-Lymph-endo-cells\_GSM481977.CEL  
163-Lymph-endo-cells\_GSM481978.CEL  
164-Lymph-endo-cells\_GSM481979.CEL  
165-Lymph-endo-cells\_GSM481976.CEL  
166-Lymph-endo-cells\_GSM481977.CEL  
167-Lymph-endo-cells\_GSM481978.CEL  
168-Lymph-endo-cells\_GSM481979.CEL  
169-Lymph-endo-cells\_GSM481976.CEL  
170-Lymph-endo-cells\_GSM481977.CEL  
171-Lymph-endo-cells\_GSM481978.CEL  
172-Lymph-endo-cells\_GSM481979.CEL  
173-Lymph-endo-cells\_GSM481976.CEL  
174-Lymph-endo-cells\_GSM481977.CEL  
175-Lymph-endo-cells\_GSM481978.CEL  
176-Lymph-endo-cells\_GSM481979.CEL  
177-Lymph-endo-cells\_GSM481976.CEL  
178-Lymph-endo-cells\_GSM481977.CEL  
179-Lymph-endo-cells\_GSM481978.CEL  
180-Lymph-endo-cells\_GSM481979.CEL  
181-Lymph-endo-cells\_GSM481976.CEL  
182-Lymph-endo-cells\_GSM481977.CEL  
183-Lymph-endo-cells\_GSM481978.CEL  
184-Lymph-endo-cells\_GSM481979.CEL  
185-Lymph-endo-cells\_GSM481976.CEL  
186-Lymph-endo-cells\_GSM481977.CEL  
187-Lymph-endo-cells\_GSM481978.CEL  
188-Lymph-endo-cells\_GSM481979.CEL  
189-Lymph-endo-cells\_GSM481976.CEL  
190-Lymph-endo-cells\_GSM481977.CEL  
191-Lymph-endo-cells\_GSM481978.CEL  
192-Lymph-endo-cells\_GSM481979.CEL  
193-Lymph-endo-cells\_GSM481976.CEL  
194-Lymph-endo-cells\_GSM481977.CEL  
195-Lymph-endo-cells\_GSM481978.CEL  
196-Lymph-endo-cells\_GSM481979.CEL  
197-Lymph-endo-cells\_GSM481976.CEL  
198-Lymph-endo-cells\_GSM481977.CEL  
199-Lymph-endo-cells\_GSM481978.CEL  
200-Lymph-endo-cells\_GSM481979.CEL



Cluster0201\_House keeping-nucleus (10 nodes)

2,620.8  
2,482.9  
2,344.9  
2,207  
2,069.1  
1,931.1  
1,793.2  
1,655.3  
1,517.3  
1,379.4  
1,241.4  
1,103.5  
965.6  
827.6  
689.7  
551.8  
413.8  
275.9  
137.9  
0

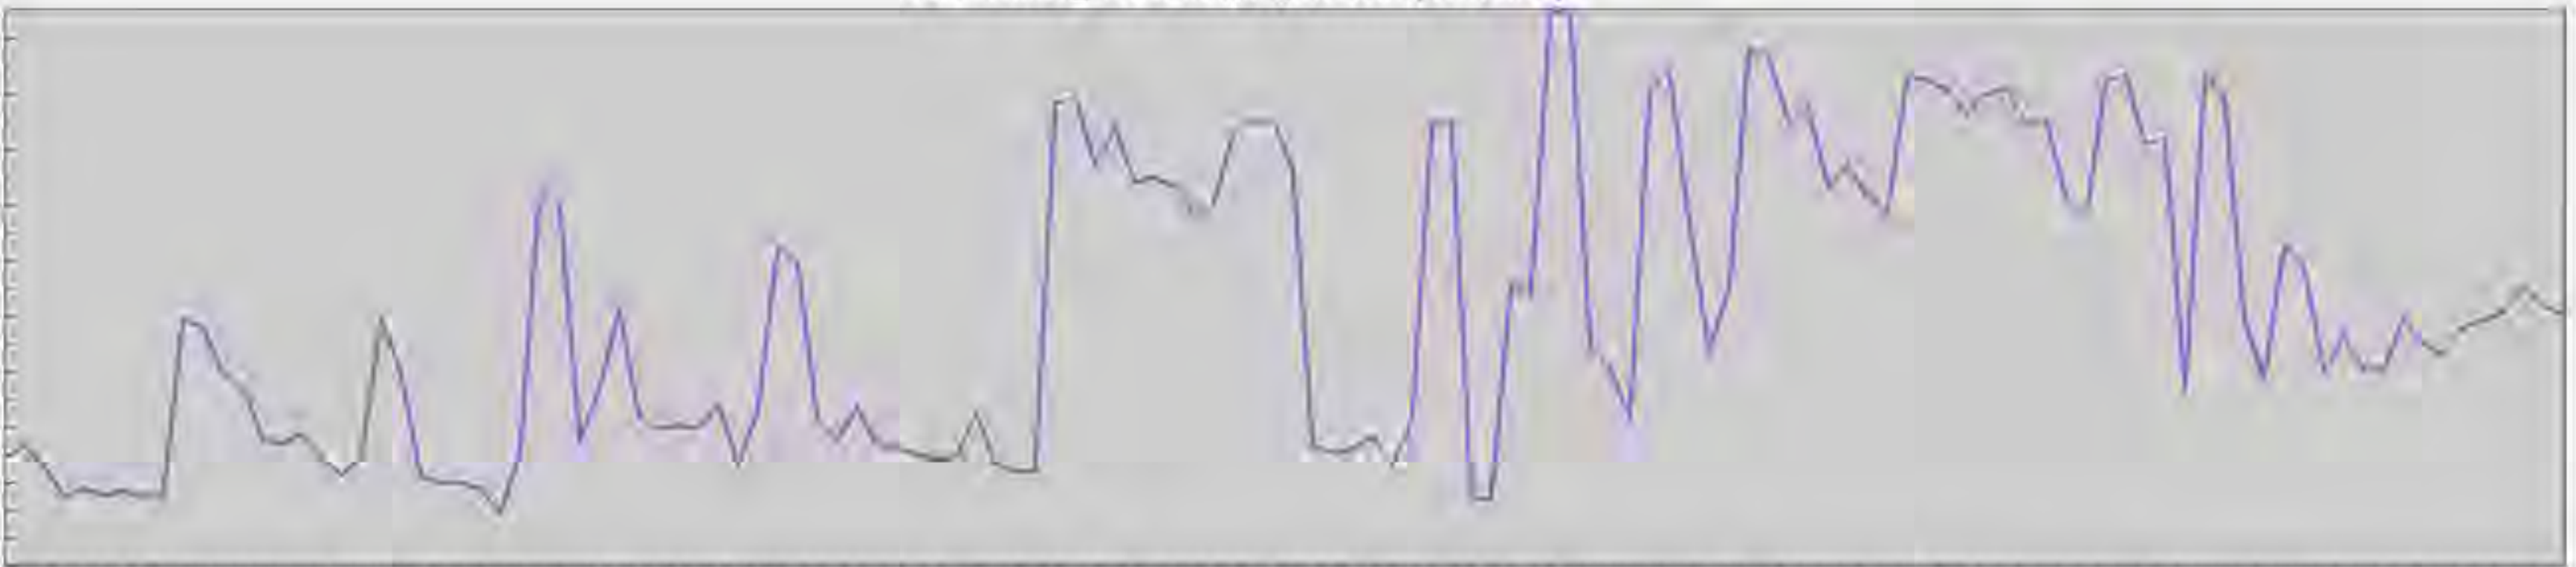

130-NALT GSM289411.CEL  
129-NALT GSM289410.CEL  
128-NALT GSM289409.CEL  
127-NALT GSM289408.CEL  
126-Column-d9 GSM1988105.CEL  
125-Column-d9 GSM1988104.CEL  
124-Column-d9 GSM1988103.CEL  
123-Column-d4 GSM1988102.CEL  
122-Column-d4 GSM1988101.CEL  
121-Intestine-large GSM258676.CEL  
120-Intestine-large GSM258675.CEL  
119-Intestine-small GSM258678.CEL  
118-Intestine-small GSM258677.CEL  
117-Lymph-nodes GSM258691.CEL  
116-Lymph-nodes GSM258692.CEL  
115-Spleen GSM258766.CEL  
114-Spleen GSM258767.CEL  
113-Neuro2a GSM258728.CEL  
112-Neuro2a GSM258727.CEL  
111-Astrocytes GSM241898.CEL  
110-mim6 GSM258726.CEL  
109-mim6 GSM258725.CEL  
108-MIMCD3 GSM258724.CEL  
107-MIMCD3 GSM258723.CEL  
106-Bruce4 GSM258656.CEL  
105-Bruce4 GSM258655.CEL  
104-C2C12 GSM258690.CEL  
103-C2C12 GSM258689.CEL  
102-NH3T3 GSM258739.CEL  
101-NH3T3 GSM258738.CEL  
100-3T3-L1 GSM258610.CEL  
99-3T3-L1 GSM258609.CEL  
98-10T12 GSM258632.CEL  
97-10T12 GSM258631.CEL  
96-Osteoblast-d21 GSM258740.CEL  
95-Osteoblast-d21 GSM258739.CEL  
94-Osteoblast-d14 GSM258738.CEL  
93-Osteoblast-d14 GSM258737.CEL  
92-Osteoblast-d5 GSM258742.CEL  
91-Osteoblast-d5 GSM258741.CEL  
90-Chondrocytes GSM266741.CEL  
89-Chondrocytes GSM266740.CEL  
88-Nat Helper cell GSM465594.CEL  
87-Nat Helper cell GSM465593.CEL  
86-LT cell GSM465596.CEL  
85-MS-1 GSM234692.CEL  
84-Lymph-endc-cells GSM143704.CEL  
83-PP-FDC GSM481977.CEL  
82-PP-FDC GSM481978.CEL  
81-PP-FDC GSM481976.CEL  
80-FLY RMLNDCC003001.CEL  
79-FLY RMLNDCC003001.CEL  
78-Follicular-Bcells GSM258664.CEL  
77-Follicular-Bcells GSM258663.CEL  
76-MZ-Bcell GSM258622.CEL  
75-MZ-Bcell GSM258621.CEL  
74-BAF3 GSM258620.CEL  
73-BAF3 GSM258619.CEL  
72-Tregs GSM258778.CEL  
71-Tregs GSM258777.CEL  
70-T-cells-CD8+ GSM258776.CEL  
69-T-cells-CD8+ GSM258775.CEL  
68-T-cells-CD4+ GSM258774.CEL  
67-T-cells-CD4+ GSM258773.CEL  
66-Thymocyte-DN GSM465595.CEL  
65-Osteoclasts GSM258744.CEL  
64-Osteoclasts GSM258743.CEL  
63-Microglia GSM258721.CEL  
62-Microglia GSM258721.CEL  
61-PM-M-LPS-7h GSM258706.CEL  
60-PM-M-LPS-7h GSM258705.CEL  
59-PM-M-LPS-7d GSM258702.CEL  
58-PM-M-LPS-6h GSM258701.CEL  
57-BMM-LPS-6h GSM258699.CEL  
56-BMM-LPS-6h GSM258699.CEL  
55-BMM-LPS-6h GSM258699.CEL  
54-BMM-LPS-6h GSM258699.CEL  
53-Plasmacytoid-DC GSM258650.CEL  
52-Plasmacytoid-DC GSM258649.CEL  
51-CD8a-DC GSM258648.CEL  
50-CD8a-DC GSM258647.CEL  
49-CD8a+DC GSM258646.CEL  
48-CD8a+DC GSM258645.CEL  
47-NK-cells GSM258732.CEL  
46-NK-cells GSM258731.CEL  
45-Mast-cells-IgE+Ad GSM258718.CEL  
44-Mast-cells-IgE+Ad GSM258717.CEL  
43-Mast-cells-IgE GSM258714.CEL  
42-Mast-cells-IgE GSM258713.CEL  
41-Mast-cells GSM258712.CEL  
40-Granulocytes GSM258668.CEL  
39-Granulocytes GSM258667.CEL  
38-GMP GSM258666.CEL  
37-GMP GSM258665.CEL  
36-GMP GSM258664.CEL  
35-CMP GSM258642.CEL  
34-CMP GSM258641.CEL  
33-MEP GSM258720.CEL  
32-MEP GSM258719.CEL  
31-HSC GSM258770.CEL  
30-HSC GSM258770.CEL  
29-Bone marrow GSM258628.CEL  
28-Bone marrow GSM258627.CEL  
27-Paneth-cells-GF GSM116357.CEL  
26-Paneth-cells-GF-1 GSM116357.CEL  
25-Paneth-cells GSM116350.CEL  
24-Paneth-cells GSM116359.CEL  
23-Paneth-cells GSM318589.CEL  
22-Paneth-cells GSM318590.CEL  
21-Column-Crypt GSM480375.CEL  
20-Column-Crypt GSM480374.CEL  
19-Column-Vill GSM480363.CEL  
18-Column-Vill GSM480362.CEL  
17-Column-IEC-GF GSM349880.CEL  
16-Column-IEC-GF GSM350375.CEL  
15-Ileum-IEC-GF GSM350376.CEL  
14-Ileum-IEC GSM350371.CEL  
13-Small-intestine-epithelium RMINEP002901.CEL  
12-Small-intestine-epithelium RMINEP001001.CEL  
11-FAE-RMPYEP002001.CEL  
10-FAE-RMPYEP001001.CEL  
09-Ileum-IEC GSM190797.CEL  
08-Ileum-IEC GSM190796.CEL  
07-Ileum-IEC GSM190795.CEL  
06-CT-v-M-cells GSM190794.CEL  
05-CT-v-M-cells GSM190793.CEL  
04-CT-v-M-cells GSM190792.CEL  
03-PP-M-cells GSM190791.CEL  
02-PP-M-cells GSM190790.CEL  
01-PP-M-cells GSM190789.CEL



Cluster0202\_House keeping (10 nodes)

5,961.8  
5,638.6  
5,325.3  
5,012.1  
4,698.8  
4,385.6  
4,072.3  
3,759  
3,445.8  
3,132.5  
2,819.3  
2,506  
2,192.8  
1,879.5  
1,566.3  
1,253  
939.8  
626.5  
313.3  
0

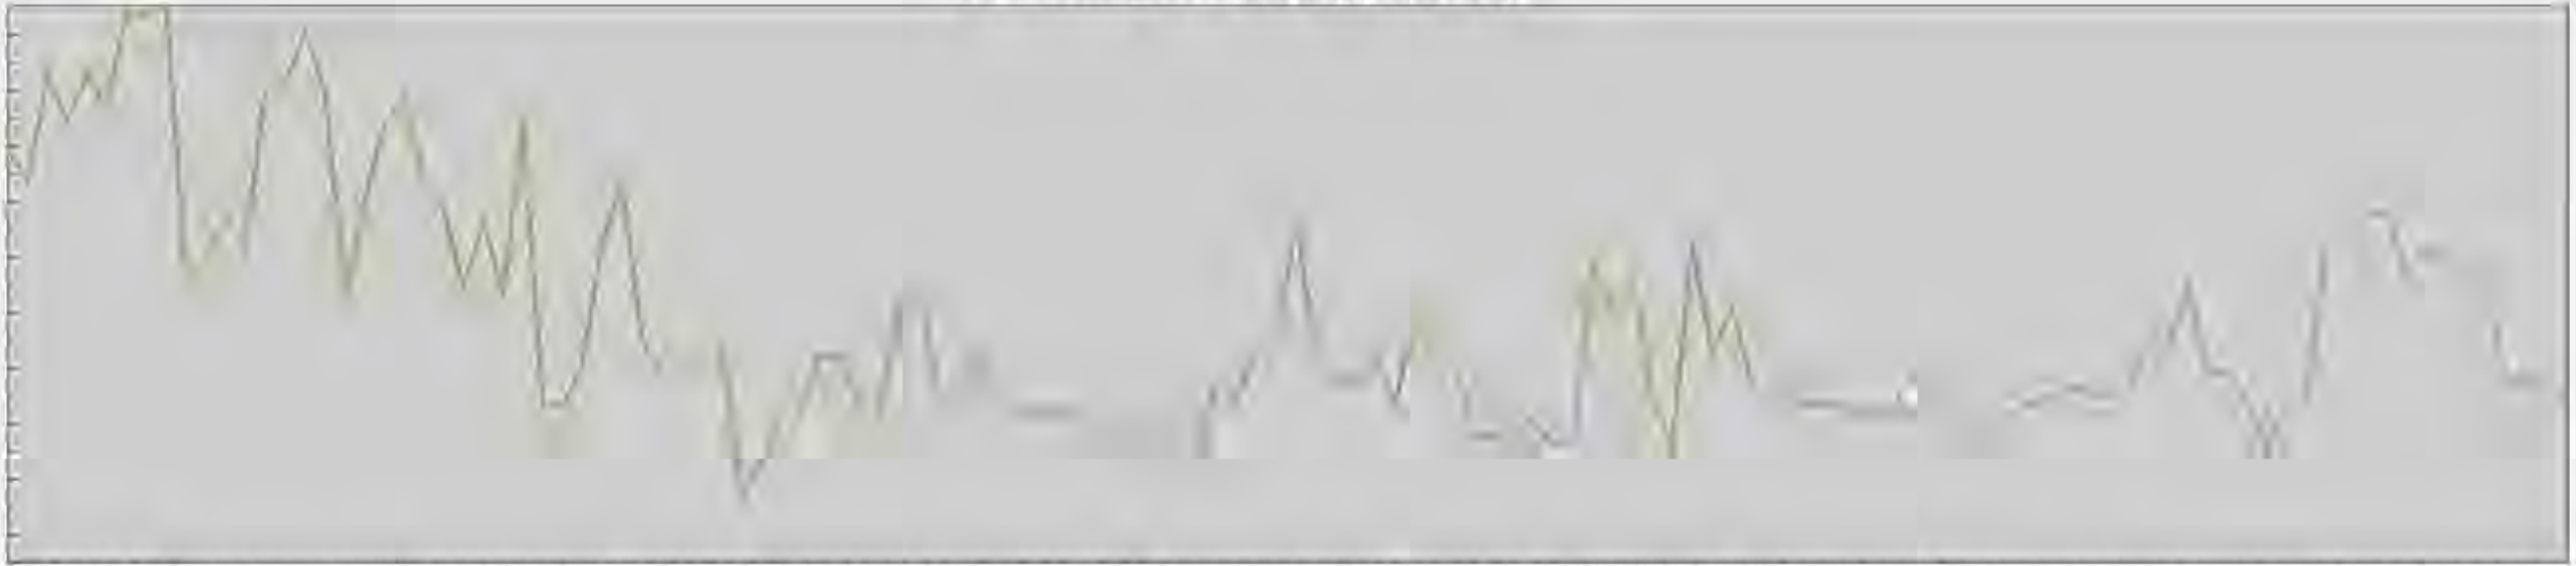

|     |                            |              |     |
|-----|----------------------------|--------------|-----|
| 130 | NALT                       | GSM289411    | CEL |
| 129 | NALT                       | GSM289410    | CEL |
| 128 | NALT                       | GSM289409    | CEL |
| 127 | NALT                       | GSM289408    | CEL |
| 126 | Colon-d9                   | GSM1988104   | CEL |
| 125 | Colon-d9                   | GSM1988103   | CEL |
| 124 | Colon-d9                   | GSM1988102   | CEL |
| 123 | Colon-d4                   | GSM1988101   | CEL |
| 122 | Colon-d4                   | GSM1988100   | CEL |
| 121 | Intestine-large            | GSM258676    | CEL |
| 120 | Intestine-large            | GSM258675    | CEL |
| 119 | Intestine-small            | GSM258678    | CEL |
| 118 | Intestine-small            | GSM258679    | CEL |
| 117 | Lymph-nodes                | GSM258691    | CEL |
| 116 | Lymph-nodes                | GSM258692    | CEL |
| 115 | Spleen                     | GSM258768    | CEL |
| 114 | Spleen                     | GSM258767    | CEL |
| 113 | Neuro2a                    | GSM258728    | CEL |
| 112 | Neuro2a                    | GSM258727    | CEL |
| 111 | Astrocytes                 | GSM241898    | CEL |
| 110 | ming                       | GSM258726    | CEL |
| 109 | ming                       | GSM258725    | CEL |
| 108 | MIMCD3                     | GSM258724    | CEL |
| 107 | MIMCD3                     | GSM258723    | CEL |
| 106 | Bruce4                     | GSM258656    | CEL |
| 105 | Bruce4                     | GSM258655    | CEL |
| 104 | C2C12                      | GSM258690    | CEL |
| 103 | C2C12                      | GSM258689    | CEL |
| 102 | NH3T3                      | GSM258739    | CEL |
| 101 | NH3T3                      | GSM258738    | CEL |
| 100 | 3T3-L1                     | GSM258610    | CEL |
| 99  | 3T3-L1                     | GSM258609    | CEL |
| 98  | 10T12                      | GSM258632    | CEL |
| 97  | 10T12                      | GSM258631    | CEL |
| 96  | Osteoblast-d21             | GSM258740    | CEL |
| 95  | Osteoblast-d21             | GSM258739    | CEL |
| 94  | Osteoblast-d14             | GSM258738    | CEL |
| 93  | Osteoblast-d14             | GSM258737    | CEL |
| 92  | Osteoblast-d5              | GSM258742    | CEL |
| 91  | Osteoblast-d5              | GSM258741    | CEL |
| 90  | Chondrocytes               | GSM266741    | CEL |
| 89  | Chondrocytes               | GSM266740    | CEL |
| 88  | Nat Helper cell            | GSM465594    | CEL |
| 87  | Nat Helper cell            | GSM465593    | CEL |
| 86  | Tt cell                    | GSM465596    | CEL |
| 85  | MS-1                       | GSM234692    | CEL |
| 84  | Lymph-endo-cells           | GSM143704    | CEL |
| 83  | PP-FDC                     | GSM481977    | CEL |
| 82  | PP-FDC                     | GSM481978    | CEL |
| 81  | PP-FDC                     | GSM481976    | CEL |
| 80  | E-LY                       | RMLNDC003001 | CEL |
| 79  | E-LY                       | RMLNDC003001 | CEL |
| 78  | Follicular-Bcells          | GSM258664    | CEL |
| 77  | Follicular-Bcells          | GSM258663    | CEL |
| 76  | MZ-Bcell                   | GSM258627    | CEL |
| 75  | MZ-Bcell                   | GSM258621    | CEL |
| 74  | BAF3                       | GSM258620    | CEL |
| 73  | BAF3                       | GSM258619    | CEL |
| 72  | Tregs                      | GSM258778    | CEL |
| 71  | T-cells-CD8+               | GSM258777    | CEL |
| 70  | T-cells-CD8+               | GSM258776    | CEL |
| 69  | T-cells-CD8+               | GSM258775    | CEL |
| 68  | T-cells-CD4+               | GSM258774    | CEL |
| 67  | T-cells-CD4+               | GSM258773    | CEL |
| 66  | Thymocyte-DN               | GSM465595    | CEL |
| 65  | Osteoclasts                | GSM258744    | CEL |
| 64  | Microglia                  | GSM258721    | CEL |
| 63  | Microglia                  | GSM258721    | CEL |
| 62  | PM-M-PS-7h                 | GSM258706    | CEL |
| 61  | PM-M-PS-7h                 | GSM258706    | CEL |
| 60  | PM-M-PS-7h                 | GSM258705    | CEL |
| 59  | PM-M-PS-7h                 | GSM258702    | CEL |
| 58  | PM-M-PS-6h                 | GSM258700    | CEL |
| 57  | PM-M-PS-6h                 | GSM258699    | CEL |
| 56  | PM-M-PS-6h                 | GSM258694    | CEL |
| 55  | PM-M-PS-6h                 | GSM258694    | CEL |
| 54  | PM-M-PS-6h                 | GSM258694    | CEL |
| 53  | Plasmacytoid-DC            | GSM258650    | CEL |
| 52  | Plasmacytoid-DC            | GSM258649    | CEL |
| 51  | CD8a-DC                    | GSM258648    | CEL |
| 50  | CD8a-DC                    | GSM258647    | CEL |
| 49  | CD8a+DC                    | GSM258646    | CEL |
| 48  | CD8a+DC                    | GSM258645    | CEL |
| 47  | NK-cells                   | GSM258732    | CEL |
| 46  | NK-cells                   | GSM258731    | CEL |
| 45  | Mast-cells-IgE+Ad          | GSM258718    | CEL |
| 44  | Mast-cells-IgE+Ad          | GSM258717    | CEL |
| 43  | Mast-cells-IgE             | GSM258714    | CEL |
| 42  | Mast-cells-IgE             | GSM258713    | CEL |
| 41  | Mast-cells                 | GSM258712    | CEL |
| 40  | Granulocytes               | GSM258668    | CEL |
| 39  | Granulocytes               | GSM258667    | CEL |
| 38  | GMP                        | GSM258666    | CEL |
| 37  | GMP                        | GSM258665    | CEL |
| 36  | GMP                        | GSM258664    | CEL |
| 35  | GMP                        | GSM258664    | CEL |
| 34  | GMP                        | GSM258642    | CEL |
| 33  | MIEP                       | GSM258720    | CEL |
| 32  | MIEP                       | GSM258719    | CEL |
| 31  | HSC                        | GSM258770    | CEL |
| 30  | HSC                        | GSM258769    | CEL |
| 29  | Bone marrow                | GSM258628    | CEL |
| 28  | Bone marrow                | GSM258627    | CEL |
| 27  | paneth-cells-GF            | GSM116358    | CEL |
| 26  | paneth-cells-GF            | GSM116357    | CEL |
| 25  | paneth-cells               | GSM116350    | CEL |
| 24  | paneth-cells               | GSM116359    | CEL |
| 23  | paneth-cells               | GSM318589    | CEL |
| 22  | paneth-cells               | GSM318590    | CEL |
| 21  | Colon-Crypt                | GSM480375    | cel |
| 20  | Colon-Crypt                | GSM480374    | cel |
| 19  | Colon-Vill                 | GSM480363    | cel |
| 18  | Colon-Vill                 | GSM480362    | cel |
| 17  | Colon-IEC-Gf               | GSM349880    | CEL |
| 16  | Colon-IEC-Gf               | GSM350375    | CEL |
| 15  | Ileum-IEC-TGF              | GSM350376    | CEL |
| 14  | Ileum-IEC-TGF              | GSM350371    | CEL |
| 13  | Small-intestine-epithelium | RMINEP002001 | CEL |
| 12  | Small-intestine-epithelium | RMINEP001001 | CEL |
| 11  | FAE-RMP                    | EP001001     | CEL |
| 10  | FAE-RMP                    | EP001001     | CEL |
| 09  | Ileum-IEC                  | GSM190797    | CEL |
| 08  | Ileum-IEC                  | GSM190796    | CEL |
| 07  | Ileum-IEC                  | GSM190795    | CEL |
| 06  | CT-v-M-cells               | GSM190794    | CEL |
| 05  | CT-v-M-cells               | GSM190793    | CEL |
| 04  | PP-M-cells                 | GSM190792    | CEL |
| 03  | PP-M-cells                 | GSM190791    | CEL |
| 02  | PP-M-cells                 | GSM190790    | CEL |
| 01  | PP-M-cells                 | GSM190789    | CEL |



Cluster0203\_Intestine-related (10 nodes)

4,452.8  
4,218.6  
3,984.1  
3,749.8  
3,515.4  
3,281  
3,046.7  
2,812.3  
2,578  
2,343.6  
2,109.2  
1,874.9  
1,640.6  
1,406.2  
1,171.8  
937.4  
703.1  
468.7  
234.4  
0

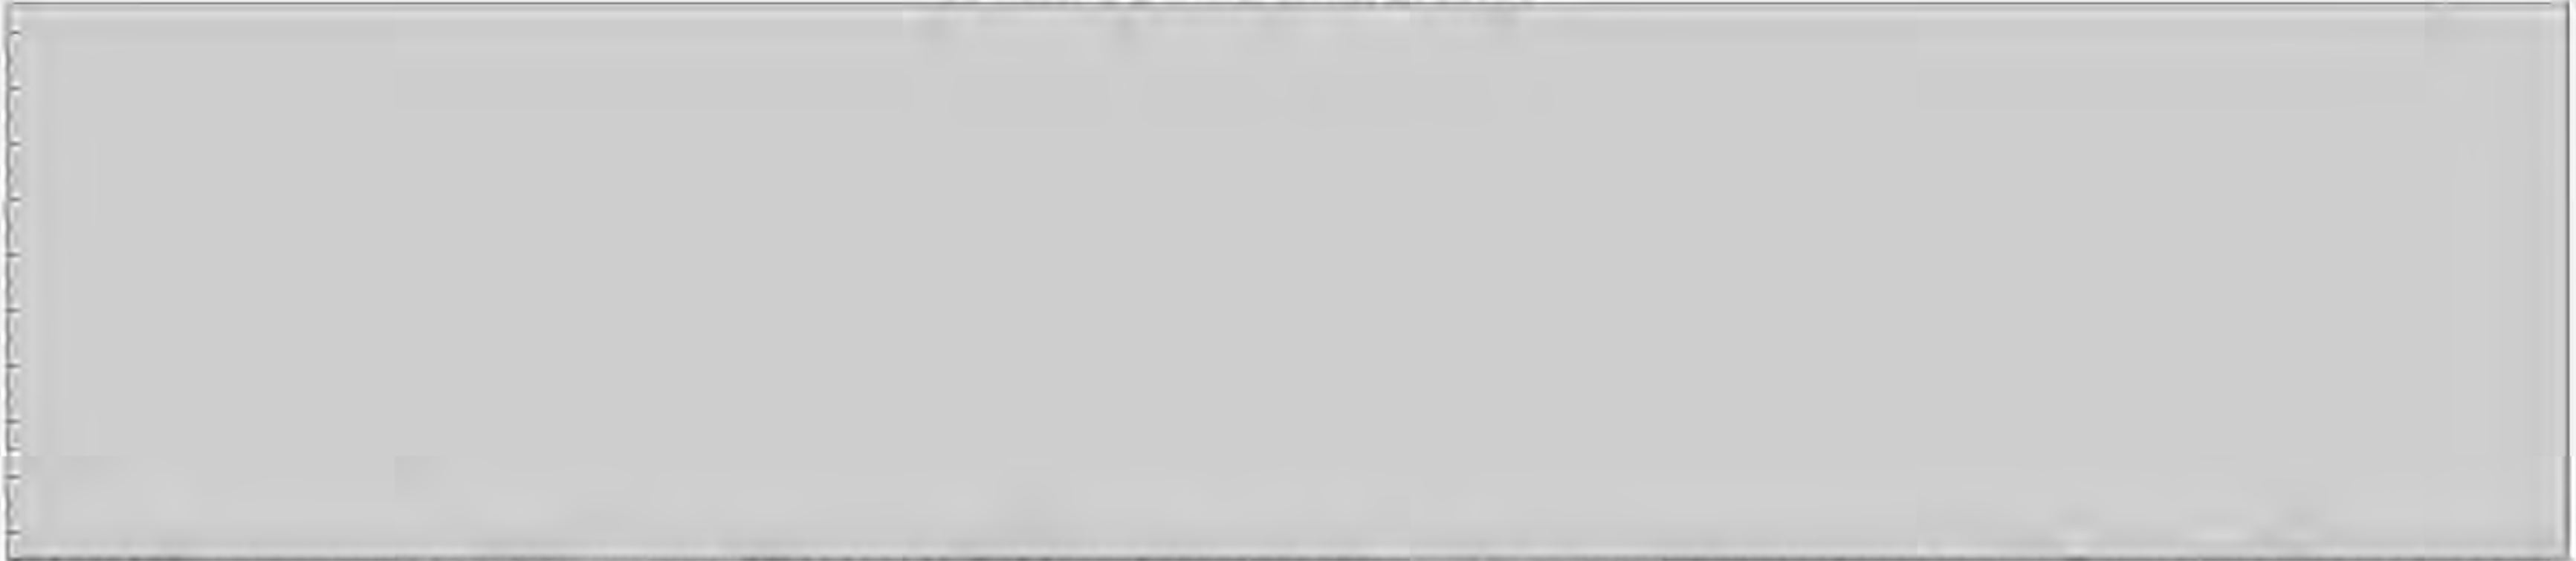

|     |                            |              |     |
|-----|----------------------------|--------------|-----|
| 30  | NALT                       | GSM2899411   | CEL |
| 29  | NALT                       | GSM2899410   | CEL |
| 28  | NALT                       | GSM2899409   | CEL |
| 27  | NALT                       | GSM2899408   | CEL |
| 26  | Colon-d9                   | GSM1988104   | CEL |
| 25  | Colon-d9                   | GSM1988103   | CEL |
| 24  | Colon-d9                   | GSM1988102   | CEL |
| 23  | Colon-d4                   | GSM1988101   | CEL |
| 22  | Colon-d4                   | GSM1988100   | CEL |
| 21  | Intestine-large            | GSM258676    | CEL |
| 20  | Intestine-large            | GSM258675    | CEL |
| 19  | Intestine-small            | GSM258674    | CEL |
| 18  | Intestine-small            | GSM258673    | CEL |
| 17  | Lymph-nodes                | GSM258672    | CEL |
| 16  | Spleen                     | GSM258671    | CEL |
| 15  | Spleen                     | GSM258670    | CEL |
| 14  | Neuro2a                    | GSM258669    | CEL |
| 13  | Neuro2a                    | GSM258668    | CEL |
| 12  | Astrocytes                 | GSM241898    | CEL |
| 11  | ming                       | GSM258667    | CEL |
| 10  | ming                       | GSM258666    | CEL |
| 09  | ming                       | GSM258665    | CEL |
| 08  | MIMCD3                     | GSM258664    | CEL |
| 07  | MIMCD3                     | GSM258663    | CEL |
| 06  | Bruce4                     | GSM258662    | CEL |
| 05  | Bruce4                     | GSM258661    | CEL |
| 04  | C2C12                      | GSM258660    | CEL |
| 03  | C2C12                      | GSM258659    | CEL |
| 02  | NH3T3                      | GSM258658    | CEL |
| 01  | NH3T3                      | GSM258657    | CEL |
| 100 | 3T3-L1                     | GSM258656    | CEL |
| 99  | 3T3-L1                     | GSM258655    | CEL |
| 98  | 10T1/2                     | GSM258654    | CEL |
| 97  | 10T1/2                     | GSM258653    | CEL |
| 96  | Osteoblast-d21             | GSM258652    | CEL |
| 95  | Osteoblast-d14             | GSM258651    | CEL |
| 94  | Osteoblast-d14             | GSM258650    | CEL |
| 93  | Osteoblast-d5              | GSM258649    | CEL |
| 92  | Osteoblast-d5              | GSM258648    | CEL |
| 91  | Chondrocytes               | GSM266741    | CEL |
| 90  | Chondrocytes               | GSM266740    | CEL |
| 89  | Nat Helper cell            | GSM465594    | CEL |
| 88  | Nat Helper cell            | GSM465593    | CEL |
| 87  | LT cell                    | GSM465592    | CEL |
| 86  | MS-1                       | GSM234692    | CEL |
| 85  | Lymph-endo-cells           | GSM143704    | CEL |
| 84  | PP-FDC                     | GSM481977    | CEL |
| 83  | PP-FDC                     | GSM481978    | CEL |
| 82  | PP-FDC                     | GSM481979    | CEL |
| 81  | PP-FDC                     | GSM481976    | CEL |
| 80  | E-L                        | RMLNDC003001 | CEL |
| 79  | E-L                        | RMLNDC003001 | CEL |
| 78  | Follicular-B-cells         | GSM258664    | CEL |
| 77  | Follicular-B-cells         | GSM258663    | CEL |
| 76  | MZ-Bcell                   | GSM258662    | CEL |
| 75  | MZ-Bcell                   | GSM258661    | CEL |
| 74  | BAF3                       | GSM258660    | CEL |
| 73  | BAF3                       | GSM258659    | CEL |
| 72  | Tregs                      | GSM258658    | CEL |
| 71  | T-cells-CD8+               | GSM258657    | CEL |
| 70  | T-cells-CD8+               | GSM258656    | CEL |
| 69  | T-cells-CD4+               | GSM258655    | CEL |
| 68  | T-cells-CD4+               | GSM258654    | CEL |
| 67  | T-cells-CD4+               | GSM258653    | CEL |
| 66  | Thymocyte-DN               | GSM465595    | CEL |
| 65  | Osteoclasts                | GSM258674    | CEL |
| 64  | Osteoclasts                | GSM258673    | CEL |
| 63  | Microglia                  | GSM258672    | CEL |
| 62  | Microglia                  | GSM258671    | CEL |
| 61  | MM-LPS-7h                  | GSM258670    | CEL |
| 60  | MM-LPS-7h                  | GSM258669    | CEL |
| 59  | MM-LPS-6h                  | GSM258668    | CEL |
| 58  | MM-LPS-6h                  | GSM258667    | CEL |
| 57  | MM-LPS-6h                  | GSM258666    | CEL |
| 56  | MM-LPS-6h                  | GSM258665    | CEL |
| 55  | MM-LPS-6h                  | GSM258664    | CEL |
| 54  | MM-LPS-6h                  | GSM258663    | CEL |
| 53  | MM-LPS-6h                  | GSM258662    | CEL |
| 52  | MM-LPS-6h                  | GSM258661    | CEL |
| 51  | MM-LPS-6h                  | GSM258660    | CEL |
| 50  | CD8a-DC                    | GSM258647    | CEL |
| 49  | CD8a-DC                    | GSM258646    | CEL |
| 48  | CD8a+DC                    | GSM258645    | CEL |
| 47  | NK-cells                   | GSM258644    | CEL |
| 46  | NK-cells                   | GSM258643    | CEL |
| 45  | Mast-cells-IgE+Ad          | GSM258642    | CEL |
| 44  | Mast-cells-IgE+Ad          | GSM258641    | CEL |
| 43  | Mast-cells-IgE             | GSM258640    | CEL |
| 42  | Mast-cells-IgE             | GSM258639    | CEL |
| 41  | Mast-cells                 | GSM258638    | CEL |
| 40  | Granulocytes               | GSM258637    | CEL |
| 39  | Granulocytes               | GSM258636    | CEL |
| 38  | GMP                        | GSM258635    | CEL |
| 37  | GMP                        | GSM258634    | CEL |
| 36  | GMP                        | GSM258633    | CEL |
| 35  | GMP                        | GSM258632    | CEL |
| 34  | GMP                        | GSM258631    | CEL |
| 33  | GMP                        | GSM258630    | CEL |
| 32  | MEP                        | GSM258629    | CEL |
| 31  | MEP                        | GSM258628    | CEL |
| 30  | HSC                        | GSM258627    | CEL |
| 29  | HSC                        | GSM258626    | CEL |
| 28  | Bone marrow                | GSM258625    | CEL |
| 27  | paneth-cells-GF            | GSM116357    | CEL |
| 26  | paneth-cells-GF            | GSM116356    | CEL |
| 25  | paneth-cells               | GSM116355    | CEL |
| 24  | paneth-cells               | GSM116354    | CEL |
| 23  | paneth-cells               | GSM318589    | CEL |
| 22  | paneth-cells               | GSM318590    | CEL |
| 21  | Colon-Crypt                | GSM480375    | CEL |
| 20  | Colon-Crypt                | GSM480374    | CEL |
| 19  | Colon-Vill                 | GSM480363    | CEL |
| 18  | Colon-Vill                 | GSM480362    | CEL |
| 17  | Colon-IEC-Gf               | GSM349880    | CEL |
| 16  | Colon-IEC-Gf               | GSM350375    | CEL |
| 15  | Ileum-IEC                  | GSM350376    | CEL |
| 14  | Ileum-IEC                  | GSM350371    | CEL |
| 13  | Small-intestine-epithelium | RMINEP002001 | CEL |
| 12  | Small-intestine-epithelium | RMINEP001001 | CEL |
| 11  | FAE                        | RMPYEP002001 | CEL |
| 10  | FAE                        | RMPYEP001001 | CEL |
| 09  | Ileum-IEC                  | GSM190797    | CEL |
| 08  | Ileum-IEC                  | GSM190796    | CEL |
| 07  | Ileum-IEC                  | GSM190795    | CEL |
| 06  | CT-v-M-cells               | GSM190794    | CEL |
| 05  | CT-v-M-cells               | GSM190793    | CEL |
| 04  | CT-y-M-cells               | GSM190792    | CEL |
| 03  | PP-M-cells                 | GSM190791    | CEL |
| 02  | PP-M-cells                 | GSM190790    | CEL |
| 01  | PP-M-cells                 | GSM190789    | CEL |



Cluster0204\_Low in Paneth cells (9 nodes)

163.7  
155.1  
146.5  
137.9  
129.3  
120.6  
112  
103.4  
94.8  
86.2  
77.6  
68.9  
60.3  
51.7  
43.1  
34.5  
25.9  
17.2  
8.6  
0

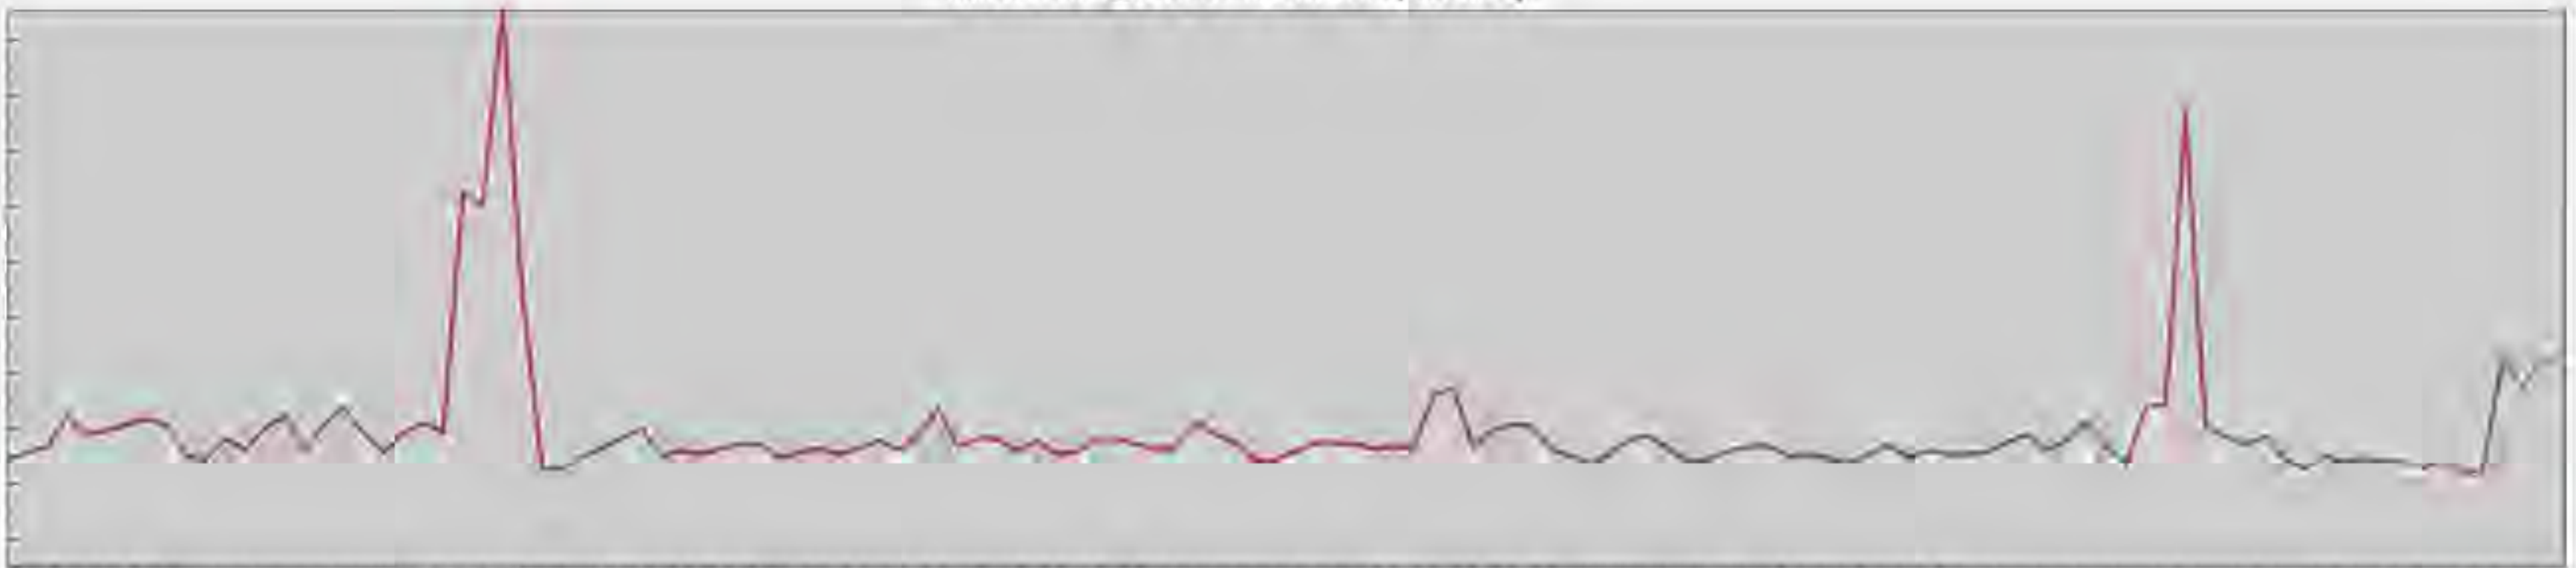

130- PP-M-cells\_GSM190789.CEL  
01- PP-M-cells\_GSM190790.CEL  
02- PP-M-cells\_GSM190791.CEL  
03- PP-M-cells\_GSM190792.CEL  
04- CT-v-M-cells\_GSM190793.CEL  
05- CT-v-M-cells\_GSM190794.CEL  
06- CT-v-M-cells\_GSM190795.CEL  
07- Ileum-IEC\_GSM190796.CEL  
08- Ileum-IEC\_GSM190797.CEL  
09- Ileum-IEC\_GSM190798.CEL  
10- FAE-RMPYE\_P001001.CEL  
11- FAE-RMPYE\_P002001.CEL  
12- Small-intestine-epithelium\_RMINEP001001.CEL  
13- Small-intestine-epithelium\_RMINEP002001.CEL  
14- Ileum-IEC\_GSM350371.CEL  
15- Ileum-IEC\_GSM350375.CEL  
16- Colon-IEC-Gf\_GSM349880.CEL  
17- Colon-IEC-Gf\_GSM350375.CEL  
18- Colon-Vill\_GSM480362.CEL  
19- Colon-Vill\_GSM480363.CEL  
20- Colon-Crypt\_GSM480374.CEL  
21- Colon-Crypt\_GSM480375.CEL  
22- Paneth-cells\_GSM318659.CEL  
23- Paneth-cells\_GSM318689.CEL  
24- Paneth-cells\_GSM116359.CEL  
25- Paneth-cells\_GSM116359.CEL  
26- Paneth-cells-Gf\_GSM116357.CEL  
27- Paneth-cells-Gf\_GSM116357.CEL  
28- Bone marrow\_GSM258627.CEL  
29- Bone marrow\_GSM258627.CEL  
30- HSC\_GSM258770.CEL  
31- HSC\_GSM258770.CEL  
32- MIEP\_GSM258770.CEL  
33- MIEP\_GSM258770.CEL  
34- CMP\_GSM258864.CEL  
35- CMP\_GSM258864.CEL  
36- GMP\_GSM258866.CEL  
37- GMP\_GSM258866.CEL  
38- GMP\_GSM258866.CEL  
39- Granulocytes\_GSM258667.CEL  
40- Mast-cells\_GSM258712.CEL  
41- Mast-cells\_GSM258712.CEL  
42- Mast-cells-IdE\_GSM258713.CEL  
43- Mast-cells-IdE+Ad\_GSM258714.CEL  
44- Mast-cells-IdE+Ad\_GSM258714.CEL  
45- Mast-cells-IdE+Ad\_GSM258718.CEL  
46- NK-cells\_GSM258731.CEL  
47- NK-cells\_GSM258731.CEL  
48- CD8a+DC\_GSM258646.CEL  
49- CD8a+DC\_GSM258646.CEL  
50- CD8a-DC\_GSM258647.CEL  
51- CD8a-DC\_GSM258647.CEL  
52- Plasmacytoid-DC\_GSM258649.CEL  
53- Plasmacytoid-DC\_GSM258649.CEL  
54- BMM-GSM258694.CEL  
55- BMM-GSM258694.CEL  
56- BMM-LPS-6h\_GSM258700.CEL  
57- BMM-LPS-6h\_GSM258700.CEL  
58- P-MM-LPS-7h\_GSM258702.CEL  
59- P-MM-LPS-7h\_GSM258702.CEL  
60- P-MM-LPS-7h\_GSM258706.CEL  
61- P-MM-LPS-7h\_GSM258706.CEL  
62- Microglia\_GSM258721.CEL  
63- Microglia\_GSM258721.CEL  
64- Osteoclasts\_GSM258743.CEL  
65- Osteoclasts\_GSM258743.CEL  
66- Thymocyte-DN\_GSM465595.CEL  
67- T-cells-CD4+GSM258773.CEL  
68- T-cells-CD4+GSM258773.CEL  
69- T-cells-CD8+GSM258774.CEL  
70- T-cells-CD8+GSM258774.CEL  
71- Tregs\_GSM258778.CEL  
72- Tregs\_GSM258778.CEL  
73- BAF3\_GSM258819.CEL  
74- BAF3\_GSM258820.CEL  
75- MZ-Bcell\_GSM258821.CEL  
76- MZ-Bcell\_GSM258821.CEL  
77- Follicular-Bcells\_GSM258864.CEL  
78- Follicular-Bcells\_GSM258864.CEL  
79- E-L-RMLNDC002001.CEL  
80- E-L-RMLNDC003001.CEL  
81- PP-FDC\_GSM481976.CEL  
82- PP-FDC\_GSM481976.CEL  
83- PP-FDC\_GSM481977.CEL  
84- Lymph-endo-cells\_GSM143704.CEL  
85- MS-1\_GSM234692.CEL  
86- Tt cell\_GSM465596.CEL  
87- Nat Helper cell\_GSM465593.CEL  
88- Nat Helper cell\_GSM465594.CEL  
89- Chondrocytes\_GSM266741.CEL  
90- Chondrocytes\_GSM266741.CEL  
91- Osteoblast-d5\_GSM258741.CEL  
92- Osteoblast-d5\_GSM258742.CEL  
93- Osteoblast-d14\_GSM258737.CEL  
94- Osteoblast-d14\_GSM258738.CEL  
95- Osteoblast-d21\_GSM258740.CEL  
96- Osteoblast-d21\_GSM258739.CEL  
97- OT12\_GSM258631.CEL  
98- OT12\_GSM258631.CEL  
99- 3T3-L1\_GSM258609.CEL  
100- 3T3-L1\_GSM258610.CEL  
101- NH3T3\_GSM258739.CEL  
102- NH3T3\_GSM258739.CEL  
103- C2C12\_GSM258829.CEL  
104- C2C12\_GSM258829.CEL  
105- Bruce4\_GSM258866.CEL  
106- Bruce4\_GSM258866.CEL  
107- MIMCD3\_GSM258723.CEL  
108- MIMCD3\_GSM258723.CEL  
109- mimb\_GSM258725.CEL  
110- mimb\_GSM258725.CEL  
111- Astrocytes\_GSM241898.CEL  
112- Astrocytes\_GSM241898.CEL  
113- Neuro2a\_GSM258728.CEL  
114- Spleen\_GSM258767.CEL  
115- Spleen\_GSM258767.CEL  
116- Lymph-nodes\_GSM258691.CEL  
117- Lymph-nodes\_GSM258691.CEL  
118- Intestine-small\_GSM258692.CEL  
119- Intestine-small\_GSM258692.CEL  
120- Intestine-large\_GSM258675.CEL  
121- Intestine-large\_GSM258675.CEL  
122- Colon-d4\_GSM198101.CEL  
123- Colon-d4\_GSM198101.CEL  
124- Colon-d9\_GSM198103.CEL  
125- Colon-d9\_GSM198103.CEL  
126- Colon-d9\_GSM198104.CEL  
127- NALT\_GSM289408.CEL  
128- NALT\_GSM289409.CEL  
129- NALT\_GSM289410.CEL  
130- NALT\_GSM289411.CEL



## Cluster0205\_Hiouse keeping-transcription (9 nodes)

2,102.2  
1,991.6  
1,880.9  
1,770.3  
1,659.6  
1,549  
1,438.4  
1,327.7  
1,217.1  
1,106.4  
995.8  
885.1  
774.5  
663.9  
553.2  
442.6  
331.9  
221.3  
110.6  
0

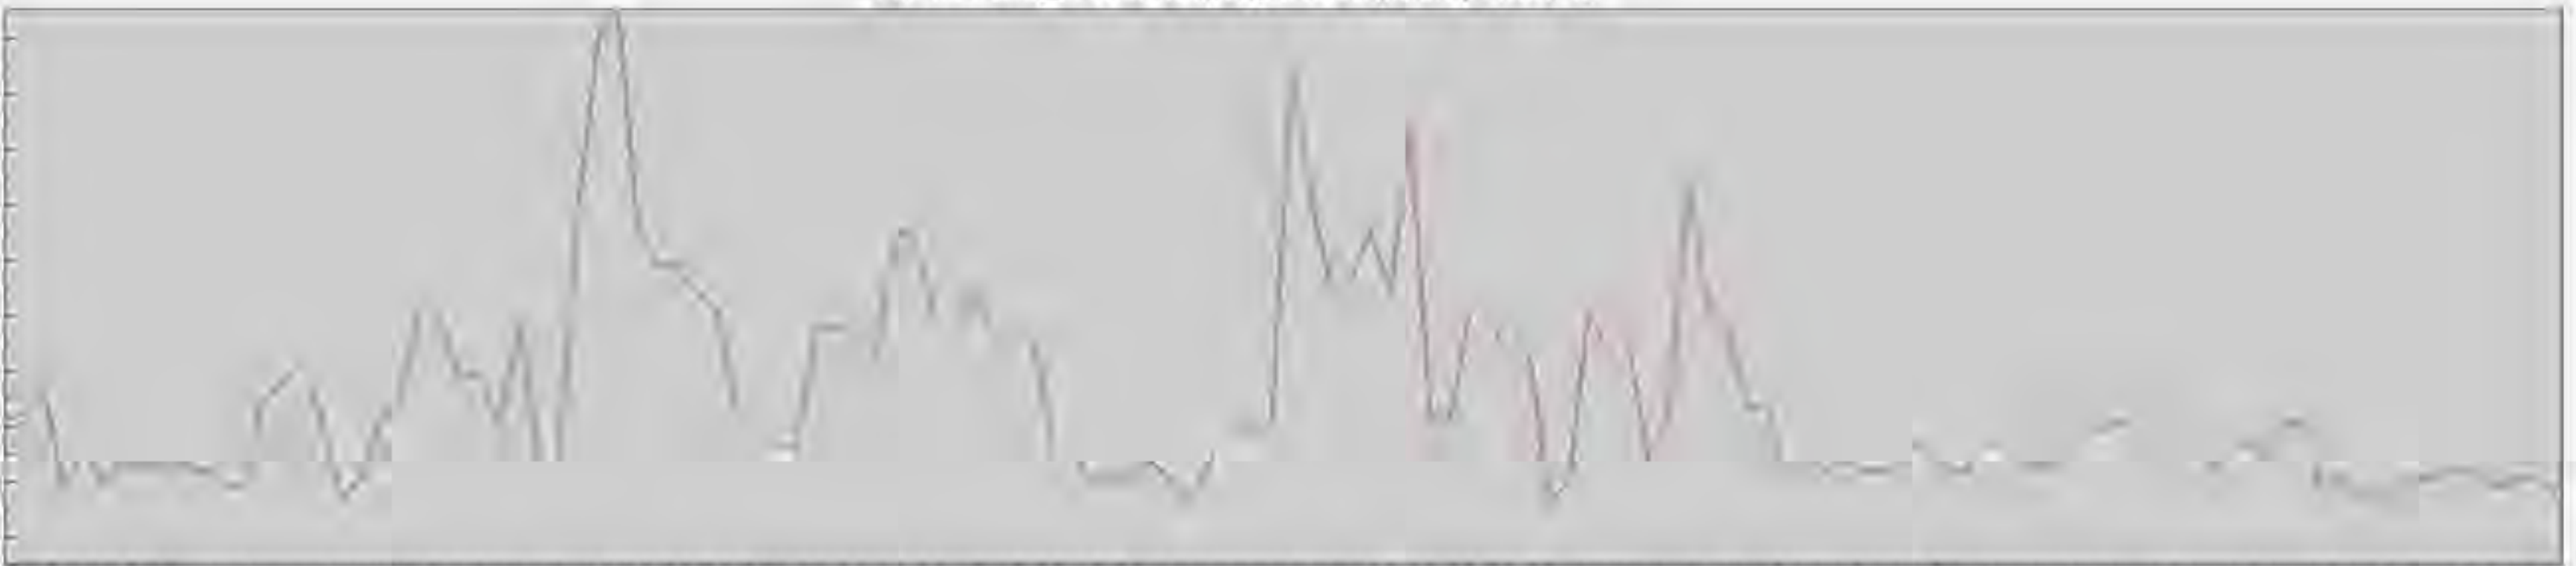

130-NALT GSM289411.CEL  
129-NALT GSM289410.CEL  
128-NALT GSM289409.CEL  
127-NALT GSM289408.CEL  
126-Colon-d9 GSM1988105.CEL  
125-Colon-d9 GSM1988104.CEL  
124-Colon-d9 GSM1988103.CEL  
123-Colon-d4 GSM1988102.CEL  
122-Colon-d4 GSM1988101.CEL  
121-Intestine-large GSM258676.CEL  
120-Intestine-large GSM258675.CEL  
119-Intestine-small GSM258678.CEL  
118-Intestine-small GSM258679.CEL  
117-Lymph-nodes GSM258691.CEL  
116-Lymph-nodes GSM258726.CEL  
115-Spleen GSM258767.CEL  
114-Spleen GSM258767.CEL  
113-Neuro2a GSM258727.CEL  
112-Neuro2a GSM2418998.CEL  
111-Astrocytes GSM2418998.CEL  
110-mim6 GSM258726.CEL  
109-mim6 GSM258725.CEL  
108-MIMCD3 GSM258724.CEL  
107-MIMCD3 GSM258723.CEL  
106-Bruce4 GSM258665.CEL  
105-Bruce4 GSM258665.CEL  
104-C2C12 GSM258690.CEL  
103-C2C12 GSM258629.CEL  
102-NH3T3 GSM258739.CEL  
101-NH3T3 GSM258739.CEL  
100-3T3-L1 GSM258610.CEL  
99-3T3-L1 GSM258609.CEL  
98-10T12 GSM258632.CEL  
97-10T12 GSM258631.CEL  
96-Osteoblast-d21 GSM258740.CEL  
95-Osteoblast-d21 GSM258739.CEL  
94-Osteoblast-d14 GSM258738.CEL  
93-Osteoblast-d14 GSM258737.CEL  
92-Osteoblast-d5 GSM258742.CEL  
91-Osteoblast-d5 GSM258741.CEL  
90-Chondrocytes GSM266741.CEL  
89-Chondrocytes GSM266740.CEL  
88-Nat Helper cell GSM465594.CEL  
87-Nat Helper cell GSM465593.CEL  
86-LT cell GSM465596.CEL  
85-MS-1 GSM234692.CEL  
84-Lymph-endo-cells GSM143704.CEL  
83-PP-FDC GSM481977.CEL  
82-PP-FDC GSM481978.CEL  
81-PP-FDC GSM481976.CEL  
80-LY-RMLNDCC003001.CEL  
79-LY-RMLNDCC003001.CEL  
78-Follicular-Bcells GSM258664.CEL  
77-Follicular-Bcells GSM258663.CEL  
76-MZ-Bcell GSM258627.CEL  
75-MZ-Bcell GSM258627.CEL  
74-BAF3 GSM258620.CEL  
73-BAF3 GSM258619.CEL  
72-Tregs GSM258778.CEL  
71-Tregs GSM258777.CEL  
70-T-cells-CD8+ GSM258776.CEL  
69-T-cells-CD8+ GSM258774.CEL  
68-T-cells-CD4+ GSM258773.CEL  
67-T-cells-CD4+ GSM258744.CEL  
66-Thymocyte-DN GSM465595.CEL  
65-Osteoclasts GSM258743.CEL  
64-Microglia GSM258721.CEL  
63-Microglia GSM258721.CEL  
62-MM-PS-7h GSM258706.CEL  
61-MM-PS-7h GSM258706.CEL  
60-MM-PS-7h GSM258705.CEL  
59-MM-PS-6h GSM258702.CEL  
58-MM-PS-6h GSM258702.CEL  
57-MM-LPS-6h GSM258699.CEL  
56-MM-LPS-6h GSM258699.CEL  
55-MM-LPS-6h GSM258699.CEL  
54-MM-LPS-6h GSM258699.CEL  
53-Plasmacytoid-DC GSM258650.CEL  
52-Plasmacytoid-DC GSM258649.CEL  
51-CD8a-DC GSM258648.CEL  
50-CD8a-DC GSM258647.CEL  
49-CD8a+DC GSM258646.CEL  
48-CD8a+DC GSM258646.CEL  
47-NK-cells GSM258732.CEL  
46-NK-cells GSM258732.CEL  
45-Mast-cells-IgE+Ad GSM258718.CEL  
44-Mast-cells-IgE+Ad GSM258717.CEL  
43-Mast-cells-IgE GSM258714.CEL  
42-Mast-cells-IgE GSM258713.CEL  
41-Mast-cells GSM258712.CEL  
40-Granulocytes GSM258668.CEL  
39-Granulocytes GSM258667.CEL  
38-GMP GSM258666.CEL  
37-GMP GSM258666.CEL  
36-GMP GSM258666.CEL  
35-GMP GSM258642.CEL  
34-MEP GSM258642.CEL  
33-MEP GSM258720.CEL  
32-MEP GSM258719.CEL  
31-HESC GSM258770.CEL  
30-HESC GSM258770.CEL  
29-Bone marrow GSM258628.CEL  
28-Bone marrow GSM258627.CEL  
27-paneth-cells-GE GSM116357.CEL  
26-paneth-cells-GE GSM116350.CEL  
25-paneth-cells GSM116350.CEL  
24-paneth-cells GSM116359.CEL  
23-paneth-cells GSM318589.CEL  
22-paneth-cells GSM318590.CEL  
21-paneth-cells GSM318590.CEL  
20-Colon-Crypt GSM480375.CEL  
19-Colon-Crypt GSM480374.CEL  
18-Colon-Vill GSM480363.CEL  
17-Colon-Vill GSM480362.CEL  
16-Colon-IEC-GE GSM349880.CEL  
15-ileum-IEC-GE GSM350375.CEL  
14-ileum-IEC-GE GSM350376.CEL  
13-Small-intestine-epithelium RMINEP002001.CEL  
12-Small-intestine-epithelium RMINEP001001.CEL  
11-FAE-RMPYEP002001.CEL  
10-FAE-RMPYEP001001.CEL  
09-ileum-IEC GSM190797.CEL  
08-ileum-IEC GSM190796.CEL  
07-ileum-IEC GSM190795.CEL  
06-CT-w-M-cells GSM190794.CEL  
05-CT-w-M-cells GSM190793.CEL  
04-CT-v-M-cells GSM190792.CEL  
03-PP-M-cells GSM190791.CEL  
02-PP-M-cells GSM190790.CEL  
01-PP-M-cells GSM190789.CEL



Cluster0206\_Uncertain-low in many (9 nodes)

217  
205.6  
194.1  
182.7  
171.3  
159.9  
148.5  
137  
125.6  
114.2  
102.8  
91.4  
79.9  
68.5  
57.1  
45.7  
34.3  
22.8  
11.4  
0

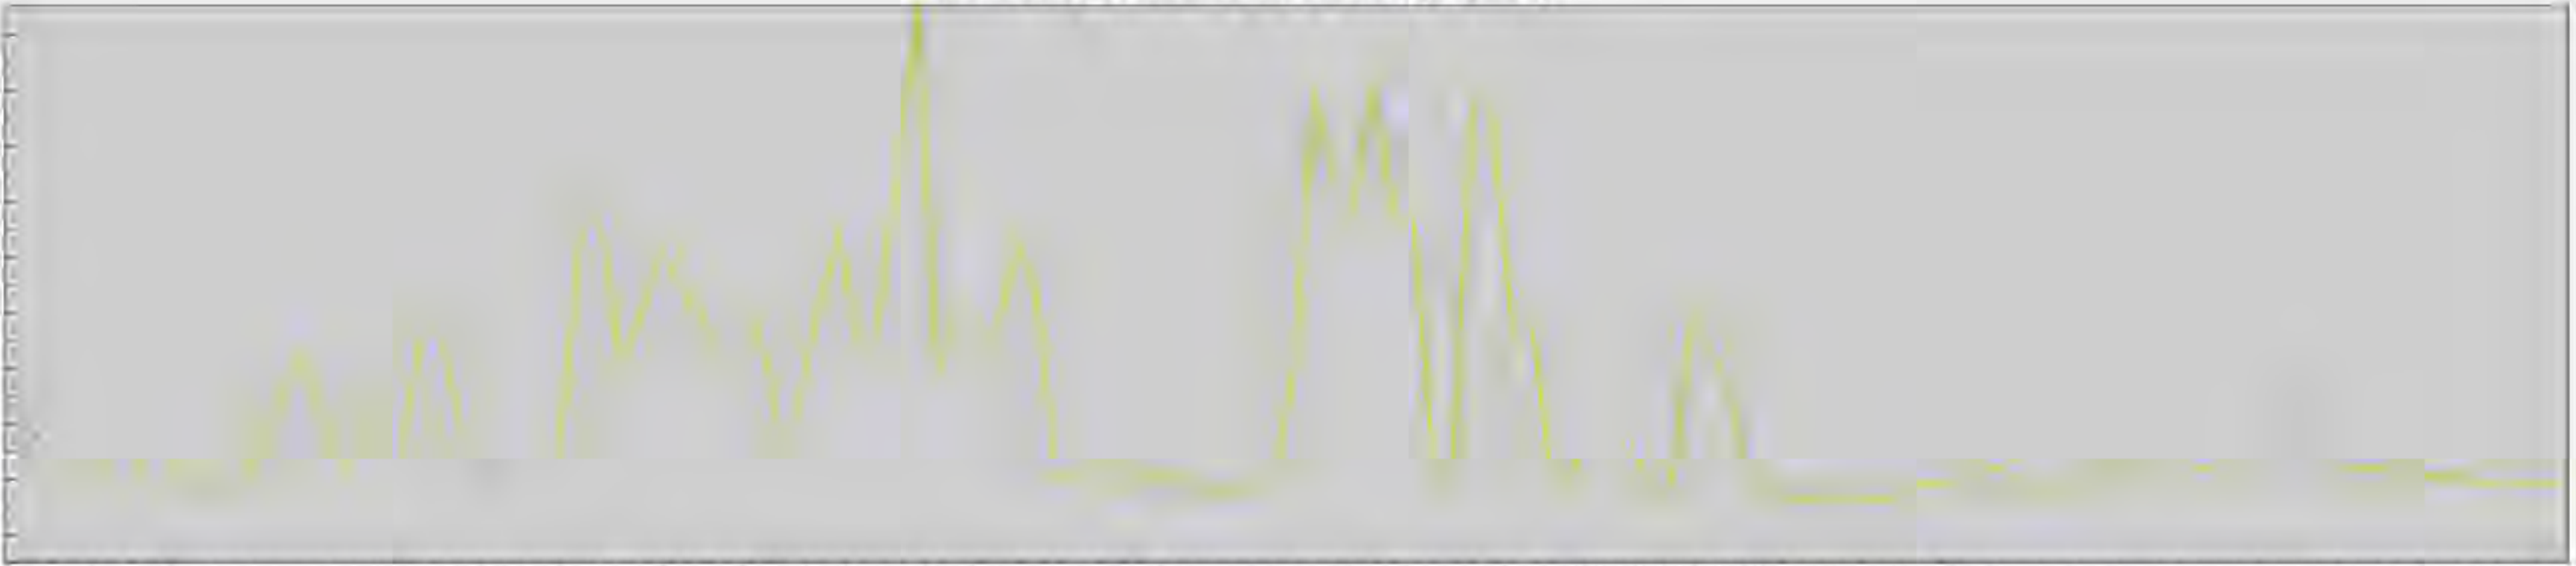

130-NALT GSM289411.CEL  
129-NALT GSM289410.CEL  
128-NALT GSM289409.CEL  
127-NALT GSM289408.CEL  
126-CD9 GSM1988105.CEL  
125-CD9 GSM1988104.CEL  
124-CD9 GSM1988103.CEL  
123-CD9 GSM1988102.CEL  
122-CD9 GSM1988101.CEL  
121-Intestine-large GSM258676.CEL  
120-Intestine-large GSM258675.CEL  
119-Intestine-small GSM258678.CEL  
118-Intestine-small GSM258677.CEL  
117-Lymph-nodes GSM258691.CEL  
116-Lymph-nodes GSM258690.CEL  
115-Spleen GSM258767.CEL  
114-Spleen GSM258768.CEL  
113-Neuro2a GSM258728.CEL  
112-Neuro2a GSM258727.CEL  
111-Astrocytes GSM241898.CEL  
110-mim6 GSM258726.CEL  
109-mim6 GSM258725.CEL  
108-MIMCD3 GSM258724.CEL  
107-MIMCD3 GSM258723.CEL  
106-Bruce4 GSM258656.CEL  
105-Bruce4 GSM258655.CEL  
104-C2C12 GSM258690.CEL  
103-C2C12 GSM258689.CEL  
102-NH3T3 GSM258730.CEL  
101-NH3T3 GSM258729.CEL  
100-3T3-L1 GSM258610.CEL  
99-3T3-L1 GSM258609.CEL  
98-10T12 GSM258632.CEL  
97-10T12 GSM258631.CEL  
96-Osteoblast-d21 GSM258740.CEL  
95-Osteoblast-d21 GSM258739.CEL  
94-Osteoblast-d14 GSM258738.CEL  
93-Osteoblast-d14 GSM258737.CEL  
92-Osteoblast-d5 GSM258742.CEL  
91-Osteoblast-d5 GSM258741.CEL  
90-Chondrocytes GSM266741.CEL  
89-Chondrocytes GSM266740.CEL  
88-Nat Helper cell GSM465594.CEL  
87-Nat Helper cell GSM465593.CEL  
86-LT cell GSM465596.CEL  
85-MS-1 GSM234692.CEL  
84-Lymph-endc-cells GSM143704.CEL  
83-PP-FDC GSM481977.CEL  
82-PP-FDC GSM481978.CEL  
81-PP-FDC GSM481976.CEL  
80-F-LY RMLNDCC003001.CEL  
79-F-LY RMLNDCC003001.CEL  
78-Follicular-Bcells GSM258664.CEL  
77-Follicular-Bcells GSM258663.CEL  
76-MZ-Bcell GSM258622.CEL  
75-MZ-Bcell GSM258621.CEL  
74-BAF3 GSM258620.CEL  
73-BAF3 GSM258619.CEL  
72-Tregs GSM258778.CEL  
71-Tregs GSM258777.CEL  
70-T-cells-CD8+ GSM258776.CEL  
69-T-cells-CD8+ GSM258775.CEL  
68-T-cells-CD4+ GSM258774.CEL  
67-T-cells-CD4+ GSM258773.CEL  
66-Thymocyte-DN GSM465595.CEL  
65-Osteoclasts GSM258744.CEL  
64-Osteoclasts GSM258743.CEL  
63-Microglia GSM258721.CEL  
62-Microglia GSM258721.CEL  
61-PM-M-PS-7h GSM258706.CEL  
60-PM-M-PS-7h GSM258705.CEL  
59-PM-M-PS-7h GSM258702.CEL  
58-PM-M-PS-6h GSM258701.CEL  
57-PM-M-PS-6h GSM258699.CEL  
56-PM-M-PS-6h GSM258699.CEL  
55-BMM GSM258694.CEL  
54-BMM GSM258694.CEL  
53-Plasmacytoid-DC GSM258650.CEL  
52-Plasmacytoid-DC GSM258649.CEL  
51-CD8a-DC GSM258648.CEL  
50-CD8a-DC GSM258647.CEL  
49-CD8a+DC GSM258646.CEL  
48-CD8a+DC GSM258645.CEL  
47-NK-cells GSM258732.CEL  
46-NK-cells GSM258731.CEL  
45-Mast-cells-IgE+Ad GSM258718.CEL  
44-Mast-cells-IgE+Ad GSM258717.CEL  
43-Mast-cells-IgE GSM258714.CEL  
42-Mast-cells-IgE GSM258713.CEL  
41-Mast-cells GSM258712.CEL  
40-Granulocytes GSM258711.CEL  
39-Granulocytes GSM258668.CEL  
38-Granulocytes GSM258667.CEL  
37-GMP GSM258666.CEL  
36-GMP GSM258665.CEL  
35-GMP GSM258642.CEL  
34-GMP GSM258641.CEL  
33-MEP GSM258720.CEL  
32-MEP GSM258719.CEL  
31-HSC GSM258770.CEL  
30-HSC GSM258769.CEL  
29-Bone marrow GSM258628.CEL  
28-Bone marrow GSM258627.CEL  
27-Paneth-cells-GF-1 GSM116357.CEL  
26-Paneth-cells-GF-1 GSM116350.CEL  
25-Paneth-cells GSM116350.CEL  
24-Paneth-cells GSM116359.CEL  
23-Paneth-cells GSM318589.CEL  
22-Paneth-cells GSM318590.CEL  
21-CD9 GSM480375.CEL  
20-CD9 GSM480374.CEL  
19-CD9 GSM480363.CEL  
18-CD9 GSM480362.CEL  
17-CD9 GSM349880.CEL  
16-CD9 GSM350375.CEL  
15-CD9 GSM350376.CEL  
14-Intestine-epithelium RMINEP002901.CEL  
13-Intestine-epithelium RMINEP002901.CEL  
12-Intestine-epithelium RMINEP001001.CEL  
11-FAE RMPYEP002001.CEL  
10-FAE RMPYEP001001.CEL  
09-Ileum-IEC GSM190797.CEL  
08-Ileum-IEC GSM190796.CEL  
07-Ileum-IEC GSM190795.CEL  
06-CT-v-M-cells GSM190794.CEL  
05-CT-v-M-cells GSM190793.CEL  
04-PP-M-cells GSM190792.CEL  
03-PP-M-cells GSM190791.CEL  
02-PP-M-cells GSM190790.CEL  
01-PP-M-cells GSM190789.CEL



Cluster0207\_Phagocyte-related (9 nodes)

3,481.8  
3,298.6  
3,115.3  
2,932.1  
2,748.8  
2,565.6  
2,382.3  
2,199.1  
2,015.8  
1,832.6  
1,648.3  
1,466  
1,282.8  
1,099.5  
916.3  
733  
549.8  
366.5  
183.3  
0

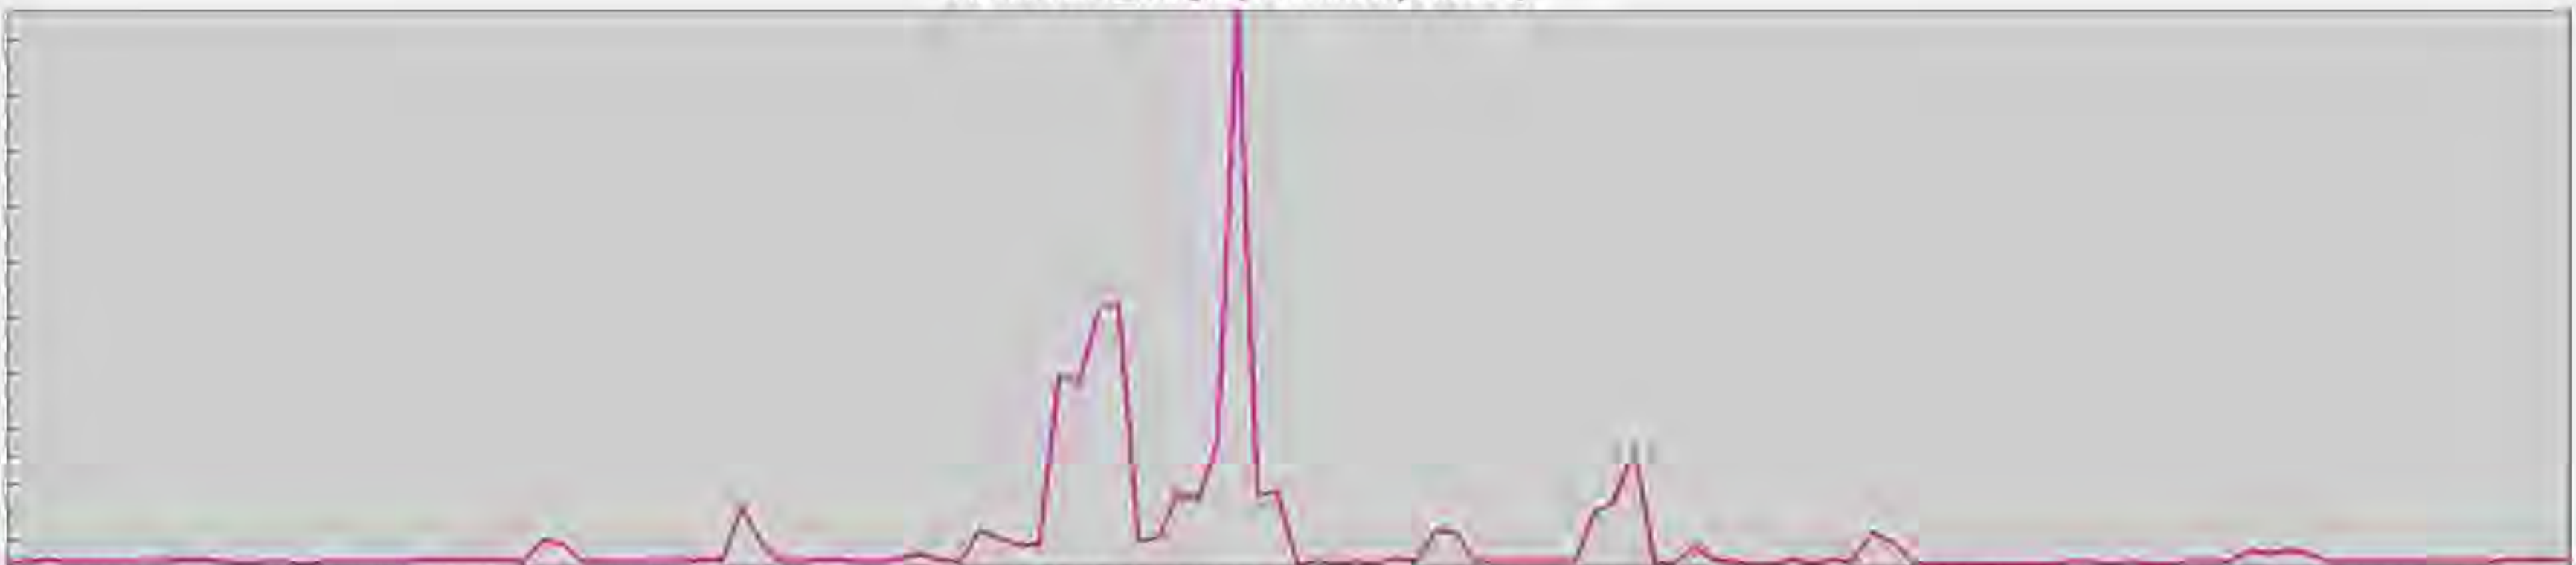

01- PP-M-cells GSM190789.CEL  
 02- PP-M-cells GSM190790.CEL  
 03- PP-M-cells GSM190791.CEL  
 04- PP-M-cells GSM190792.CEL  
 05- CT-v-M-cells GSM190793.CEL  
 06- CT-w-M-cells GSM190794.CEL  
 07- Ileum-IEC GSM190795.CEL  
 08- Ileum-IEC GSM190796.CEL  
 09- Ileum-IEC GSM190797.CEL  
 10- FAE-RMPYEP001001.CEL  
 11- FAE-RMPYEP002001.CEL  
 12- Small-intestine-epithelium\_RMINEP001001.CEL  
 13- Small-intestine-epithelium\_RMINEP002001.CEL  
 14- Ileum-IEC GSM350371.CEL  
 15- Ileum-IEC GSM350375.CEL  
 16- Colon-IEC-Gf GSM349880.CEL  
 17- Colon-IEC-Gf GSM350375.CEL  
 18- Colon-Vill GSM480362.CEL  
 19- Colon-Vill GSM480363.CEL  
 20- Colon-Crypt GSM480374.CEL  
 21- Colon-Crypt GSM480375.CEL  
 22- Paneth-cells GSM318590.CEL  
 23- Paneth-cells GSM318589.CEL  
 24- Paneth-cells GSM116359.CEL  
 25- Paneth-cells GSM116350.CEL  
 26- Paneth-cells-Gf GSM116357.CEL  
 27- Paneth-cells-Gf GSM116358.CEL  
 28- Bone marrow GSM258627.CEL  
 29- Bone marrow GSM258627.CEL  
 30- HSC GSM258770.CEL  
 31- HSC GSM258770.CEL  
 32- MIEP GSM258770.CEL  
 33- MIEP GSM258770.CEL  
 34- MIEP GSM258770.CEL  
 35- CMP GSM258642.CEL  
 36- CMP GSM258642.CEL  
 37- GMP GSM258666.CEL  
 38- GMP GSM258666.CEL  
 39- GMP GSM258666.CEL  
 40- Granulocytes GSM258667.CEL  
 41- Mast-cells GSM258712.CEL  
 42- Mast-cells GSM258712.CEL  
 43- Mast-cells-Gf GSM258714.CEL  
 44- Mast-cells-Gf GSM258714.CEL  
 45- Mast-cells-IdU+Ad GSM258718.CEL  
 46- NK-cells GSM258732.CEL  
 47- NK-cells GSM258732.CEL  
 48- CD8a+DC GSM258646.CEL  
 49- CD8a+DC GSM258646.CEL  
 50- CD8a-DC GSM258647.CEL  
 51- CD8a-DC GSM258647.CEL  
 52- Plasmacytoid-DC GSM258649.CEL  
 53- Plasmacytoid-DC GSM258649.CEL  
 54- BM-M-LPS-6h GSM258694.CEL  
 55- BM-M-LPS-6h GSM258694.CEL  
 56- BM-M-LPS-7h GSM258700.CEL  
 57- BM-M-LPS-7h GSM258700.CEL  
 58- BM-M-LPS-7h GSM258705.CEL  
 59- BM-M-LPS-7h GSM258705.CEL  
 60- Microglia GSM258721.CEL  
 61- Microglia GSM258721.CEL  
 62- Osteoclasts GSM258743.CEL  
 63- Osteoclasts GSM258743.CEL  
 64- Thymocyte-DN GSM465595.CEL  
 65- Thymocyte-DN GSM465595.CEL  
 66- T-cells-CD4+ GSM258773.CEL  
 67- T-cells-CD4+ GSM258773.CEL  
 68- T-cells-CD8+ GSM258774.CEL  
 69- T-cells-CD8+ GSM258774.CEL  
 70- T-cells-CD8+ GSM258775.CEL  
 71- T-cells-CD8+ GSM258775.CEL  
 72- Tregs GSM258778.CEL  
 73- Tregs GSM258778.CEL  
 74- BAF3 GSM258620.CEL  
 75- BAF3 GSM258620.CEL  
 76- MZ-Bcell GSM258622.CEL  
 77- MZ-Bcell GSM258622.CEL  
 78- Follicular-Bcells GSM258664.CEL  
 79- Follicular-Bcells GSM258664.CEL  
 80- F-LY-RMLNDC002001.CEL  
 81- F-LY-RMLNDC003001.CEL  
 82- P-P-FDC GSM481978.CEL  
 83- P-P-FDC GSM481978.CEL  
 84- P-P-FDC GSM481978.CEL  
 85- MS-1 GSM234692.CEL  
 86- L1 cell GSM465596.CEL  
 87- Nat Helper cell GSM465593.CEL  
 88- Nat Helper cell GSM465593.CEL  
 89- Chondrocytes GSM266741.CEL  
 90- Chondrocytes GSM266741.CEL  
 91- Osteoblast-d5 GSM258742.CEL  
 92- Osteoblast-d5 GSM258742.CEL  
 93- Osteoblast-d14 GSM258737.CEL  
 94- Osteoblast-d14 GSM258737.CEL  
 95- Osteoblast-d21 GSM258738.CEL  
 96- Osteoblast-d21 GSM258738.CEL  
 97- OT12 GSM258632.CEL  
 98- OT12 GSM258632.CEL  
 99- 3T3-L1 GSM258609.CEL  
 100- 3T3-L1 GSM258610.CEL  
 101- NH3T3 GSM258729.CEL  
 102- NH3T3 GSM258729.CEL  
 103- C2C12 GSM258629.CEL  
 104- C2C12 GSM258629.CEL  
 105- Bruce4 GSM258690.CEL  
 106- Bruce4 GSM258690.CEL  
 107- MIMCD3 GSM258723.CEL  
 108- MIMCD3 GSM258723.CEL  
 109- mimb GSM258725.CEL  
 110- mimb GSM258725.CEL  
 111- Astrocytes GSM241898.CEL  
 112- Astrocytes GSM241898.CEL  
 113- Spleen GSM258767.CEL  
 114- Spleen GSM258767.CEL  
 115- Lymph-nodes GSM258678.CEL  
 116- Lymph-nodes GSM258678.CEL  
 117- Lymph-nodes GSM258691.CEL  
 118- Intestine-small GSM258692.CEL  
 119- Intestine-small GSM258692.CEL  
 120- Intestine-large GSM258675.CEL  
 121- Intestine-large GSM258675.CEL  
 122- Colon-d4 GSM198101.CEL  
 123- Colon-d4 GSM198101.CEL  
 124- Colon-d9 GSM198103.CEL  
 125- Colon-d9 GSM198103.CEL  
 126- Colon-d9 GSM198104.CEL  
 127- NALT GSM289408.CEL  
 128- NALT GSM289409.CEL  
 129- NALT GSM289410.CEL  
 130- NALT GSM289411.CEL











Cluster0210\_Phagocyte-related (9 nodes)

3,071.4  
2,909.7  
2,748.1  
2,588.4  
2,424.8  
2,263.1  
2,101.5  
1,939.8  
1,778.2  
1,618.6  
1,454.9  
1,293.2  
1,131.6  
969.9  
808.3  
646.8  
485  
323.3  
161.7  
0

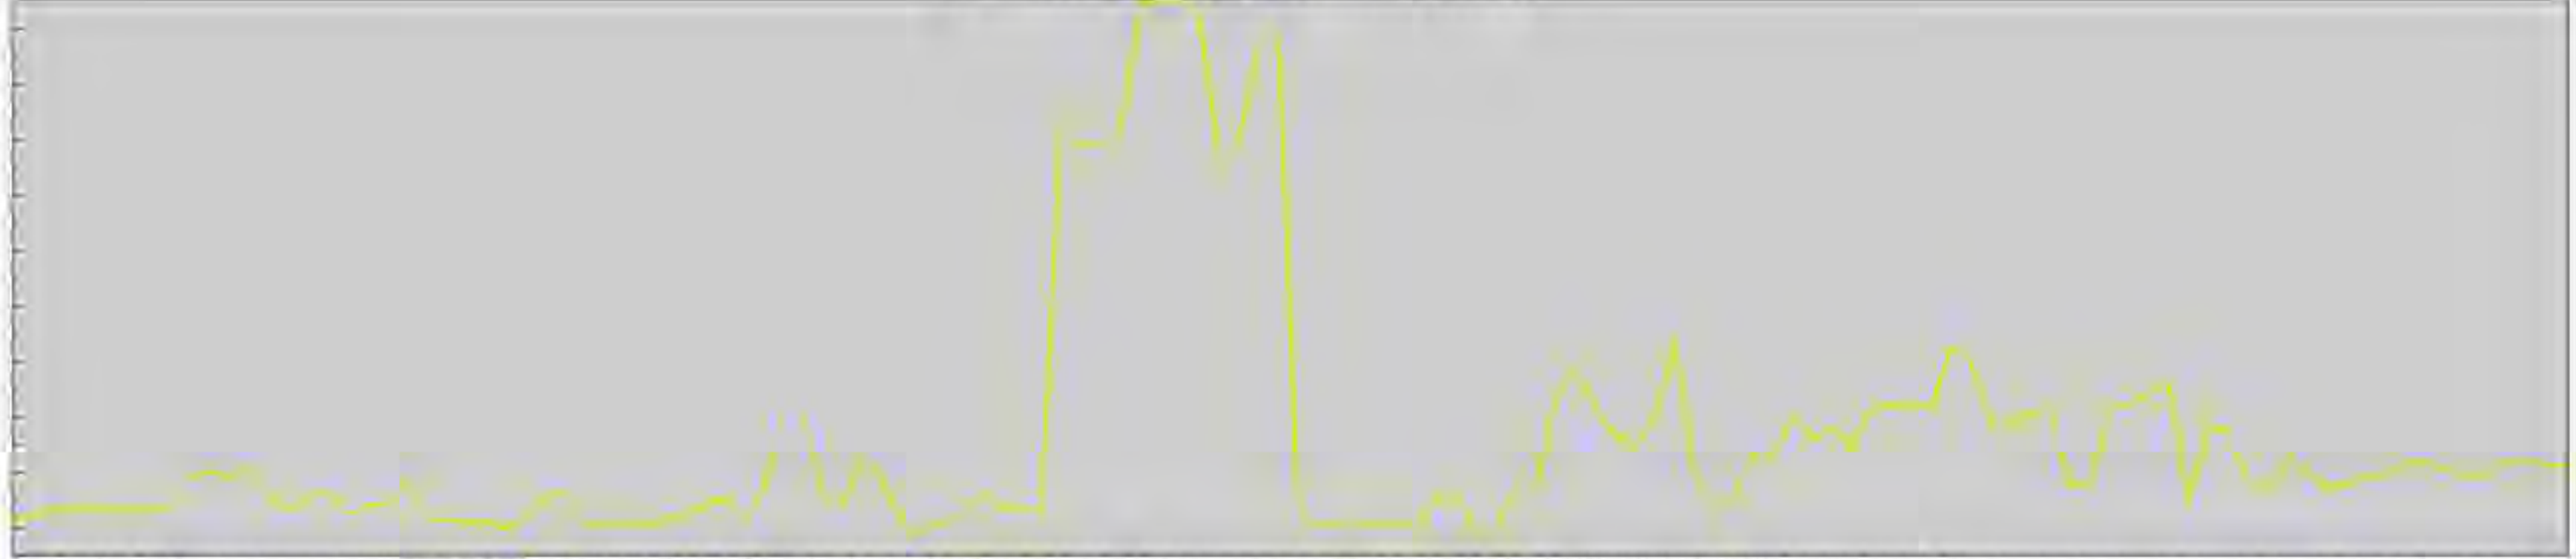

130-NALT GSM289411.CEL  
129-NALT GSM289410.CEL  
128-NALT GSM289409.CEL  
127-NALT GSM289408.CEL  
126-Colon-d9 GSM1988105.CEL  
125-Colon-d9 GSM1988104.CEL  
124-Colon-d9 GSM1988103.CEL  
123-Colon-d4 GSM1988102.CEL  
122-Colon-d4 GSM1988101.CEL  
121-Intestine-large GSM258676.CEL  
120-Intestine-large GSM258675.CEL  
119-Intestine-small GSM258674.CEL  
118-Intestine-small GSM258673.CEL  
117-Lymph-nodes GSM258672.CEL  
116-Lymph-nodes GSM258671.CEL  
115-Spleen GSM258767.CEL  
114-Spleen GSM258767.CEL  
113-Neuro2a GSM258728.CEL  
112-Neuro2a GSM258727.CEL  
111-Astrocytes GSM241898.CEL  
110-mimb GSM258726.CEL  
109-mimb GSM258725.CEL  
108-MIMCD3 GSM258724.CEL  
107-MIMCD3 GSM258723.CEL  
106-Bruce4 GSM258665.CEL  
105-Bruce4 GSM258665.CEL  
104-C2C12 GSM258690.CEL  
103-C2C12 GSM258689.CEL  
102-NH3T3 GSM258739.CEL  
101-NH3T3 GSM258739.CEL  
100-3T3-L1 GSM258610.CEL  
99-3T3-L1 GSM258609.CEL  
98-10T12 GSM258632.CEL  
97-10T12 GSM258631.CEL  
96-Osteoblast-d21 GSM258740.CEL  
95-Osteoblast-d21 GSM258739.CEL  
94-Osteoblast-d14 GSM258738.CEL  
93-Osteoblast-d14 GSM258737.CEL  
92-Osteoblast-d5 GSM258742.CEL  
91-Osteoblast-d5 GSM258741.CEL  
90-Chondrocytes GSM266741.CEL  
89-Chondrocytes GSM266740.CEL  
88-Nat Helper cell GSM465594.CEL  
87-Nat Helper cell GSM465593.CEL  
86-TT cell GSM465596.CEL  
85-MS-1 GSM234692.CEL  
84-Lymph-endo-cells GSM143704.CEL  
83-P-FDC GSM481977.CEL  
82-P-FDC GSM481978.CEL  
81-P-FDC GSM481976.CEL  
80-L-Y RMLNDCC003001.CEL  
79-L-Y RMLNDCC003001.CEL  
78-Follicular-Bcells GSM258664.CEL  
77-Follicular-Bcells GSM258663.CEL  
76-MZ-Bcell GSM258622.CEL  
75-MZ-Bcell GSM258621.CEL  
74-BAF3 GSM258620.CEL  
73-BAF3 GSM258619.CEL  
72-Tregs GSM258778.CEL  
71-Tregs GSM258777.CEL  
70-T-cells-CD8+ GSM258776.CEL  
69-T-cells-CD8+ GSM258774.CEL  
68-T-cells-CD4+ GSM258773.CEL  
67-T-cells-CD4+ GSM258744.CEL  
66-Thymocyte-DN GSM465595.CEL  
65-Osteoclasts GSM258743.CEL  
64-Microglia GSM258721.CEL  
63-Microglia GSM258721.CEL  
62-MM-LPS-7h GSM258706.CEL  
61-MM-LPS-7h GSM258706.CEL  
60-MM-LPS-6h GSM258702.CEL  
59-MM-LPS-6h GSM258702.CEL  
58-MM-LPS-6h GSM258699.CEL  
57-MM-LPS-6h GSM258699.CEL  
56-MM-LPS-6h GSM258694.CEL  
55-MM-LPS-6h GSM258694.CEL  
54-Plasmacytoid-DC GSM258650.CEL  
53-Plasmacytoid-DC GSM258649.CEL  
52-CD8a-DC GSM258647.CEL  
51-CD8a-DC GSM258647.CEL  
50-CD8a+DC GSM258646.CEL  
49-CD8a+DC GSM258646.CEL  
48-NK-cells GSM258732.CEL  
47-NK-cells GSM258731.CEL  
46-Mast-cells-IgE+Ad GSM258719.CEL  
45-Mast-cells-IgE+Ad GSM258717.CEL  
44-Mast-cells-IgE GSM258714.CEL  
43-Mast-cells-IgE GSM258713.CEL  
42-Mast-cells-IgE GSM258712.CEL  
41-Mast-cells-IgE GSM258712.CEL  
40-Granulocytes GSM258668.CEL  
39-Granulocytes GSM258667.CEL  
38-GMP GSM258666.CEL  
37-GMP GSM258665.CEL  
36-GMP GSM258664.CEL  
35-GMP GSM258642.CEL  
34-MEP GSM258872.CEL  
33-MEP GSM258871.CEL  
32-MEP GSM258871.CEL  
31-HESC GSM258770.CEL  
30-HESC GSM258770.CEL  
29-Bone marrow GSM258628.CEL  
28-Bone marrow GSM258627.CEL  
27-paneth-cells-GF-1 GSM116358.CEL  
26-paneth-cells-GF-1 GSM116357.CEL  
25-paneth-cells GSM116350.CEL  
24-paneth-cells GSM116359.CEL  
23-paneth-cells GSM318589.CEL  
22-paneth-cells GSM318590.CEL  
21-paneth-cells GSM318590.CEL  
20-Colon-Crypt GSM480375.CEL  
19-Colon-Vill GSM480363.CEL  
18-Colon-Vill GSM480362.CEL  
17-Colon-IEC-GF GSM349880.CEL  
16-Colon-IEC-GF GSM350375.CEL  
15-Ileum-IEC-GF GSM350376.CEL  
14-Ileum-IEC GSM350371.CEL  
13-Small-intestine-epithelium RMINEP002001.CEL  
12-Small-intestine-epithelium RMINEP001001.CEL  
11-FAE-RMPYEP002001.CEL  
10-FAE-RMPYEP001001.CEL  
9-Ileum-IEC GSM190797.CEL  
8-Ileum-IEC GSM190796.CEL  
7-Ileum-IEC GSM190795.CEL  
6-CT-v-M-cells GSM190794.CEL  
5-CT-v-M-cells GSM190793.CEL  
4-CT-v-M-cells GSM190792.CEL  
3-PP-M-cells GSM190791.CEL  
2-PP-M-cells GSM190790.CEL  
1-PP-M-cells GSM190789.CEL



Cluster0211\_intestine-related (9 nodes)

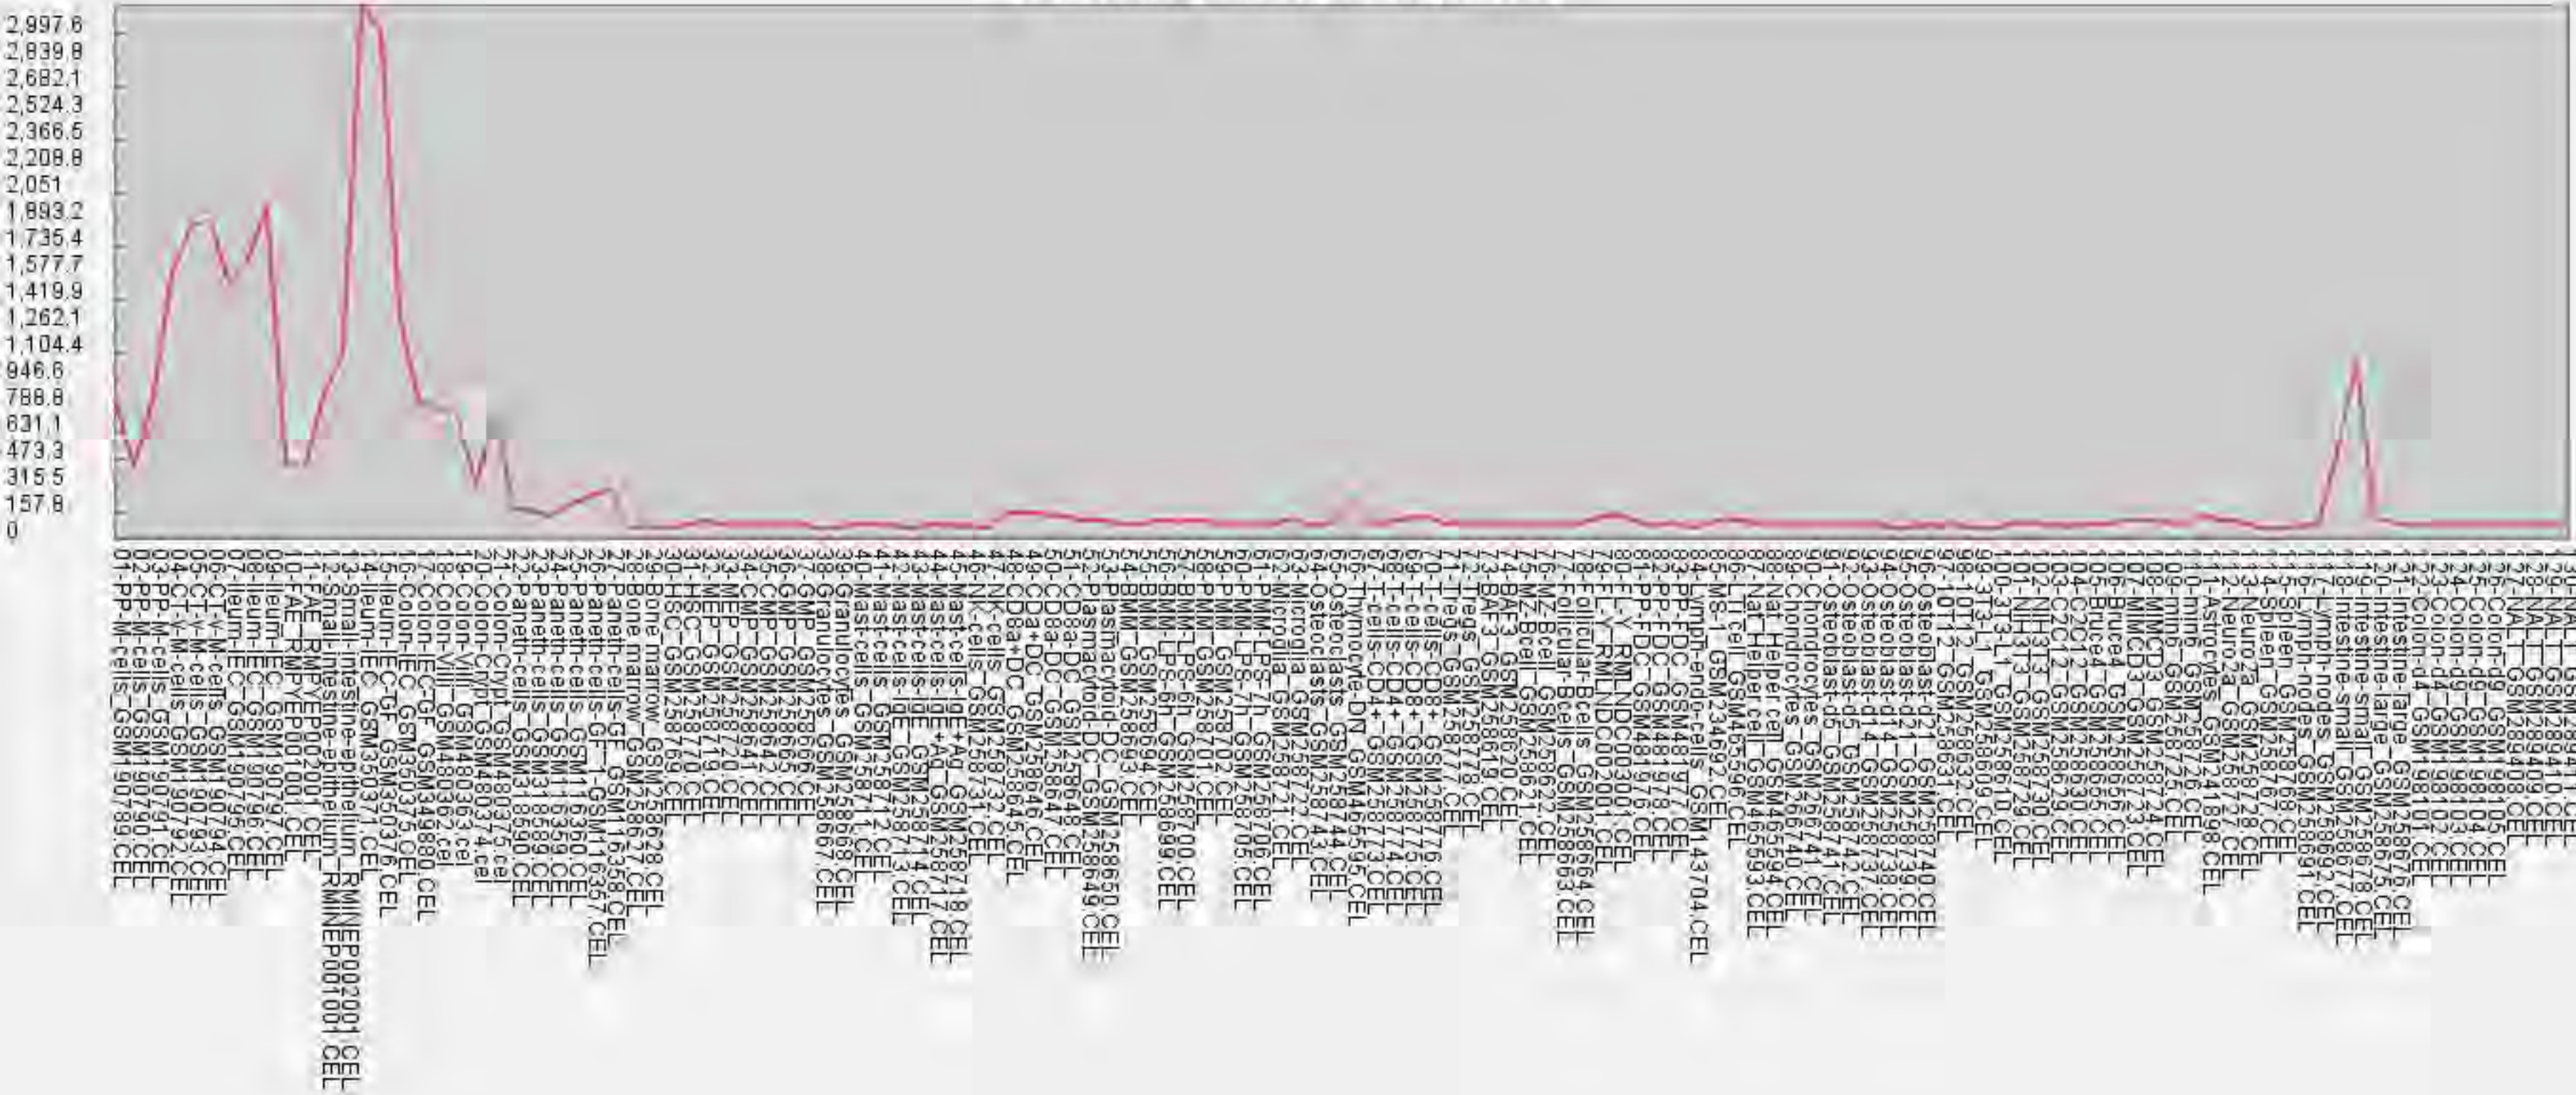



Cluster0212\_House keeping-cell cycle (9 nodes)

2,007.2  
1,901.6  
1,795.9  
1,690.3  
1,584.7  
1,479  
1,373.4  
1,267.7  
1,162.1  
1,056.4  
950.8  
845.2  
739.5  
633.9  
528.2  
422.6  
316.9  
211.3  
105.6  
0

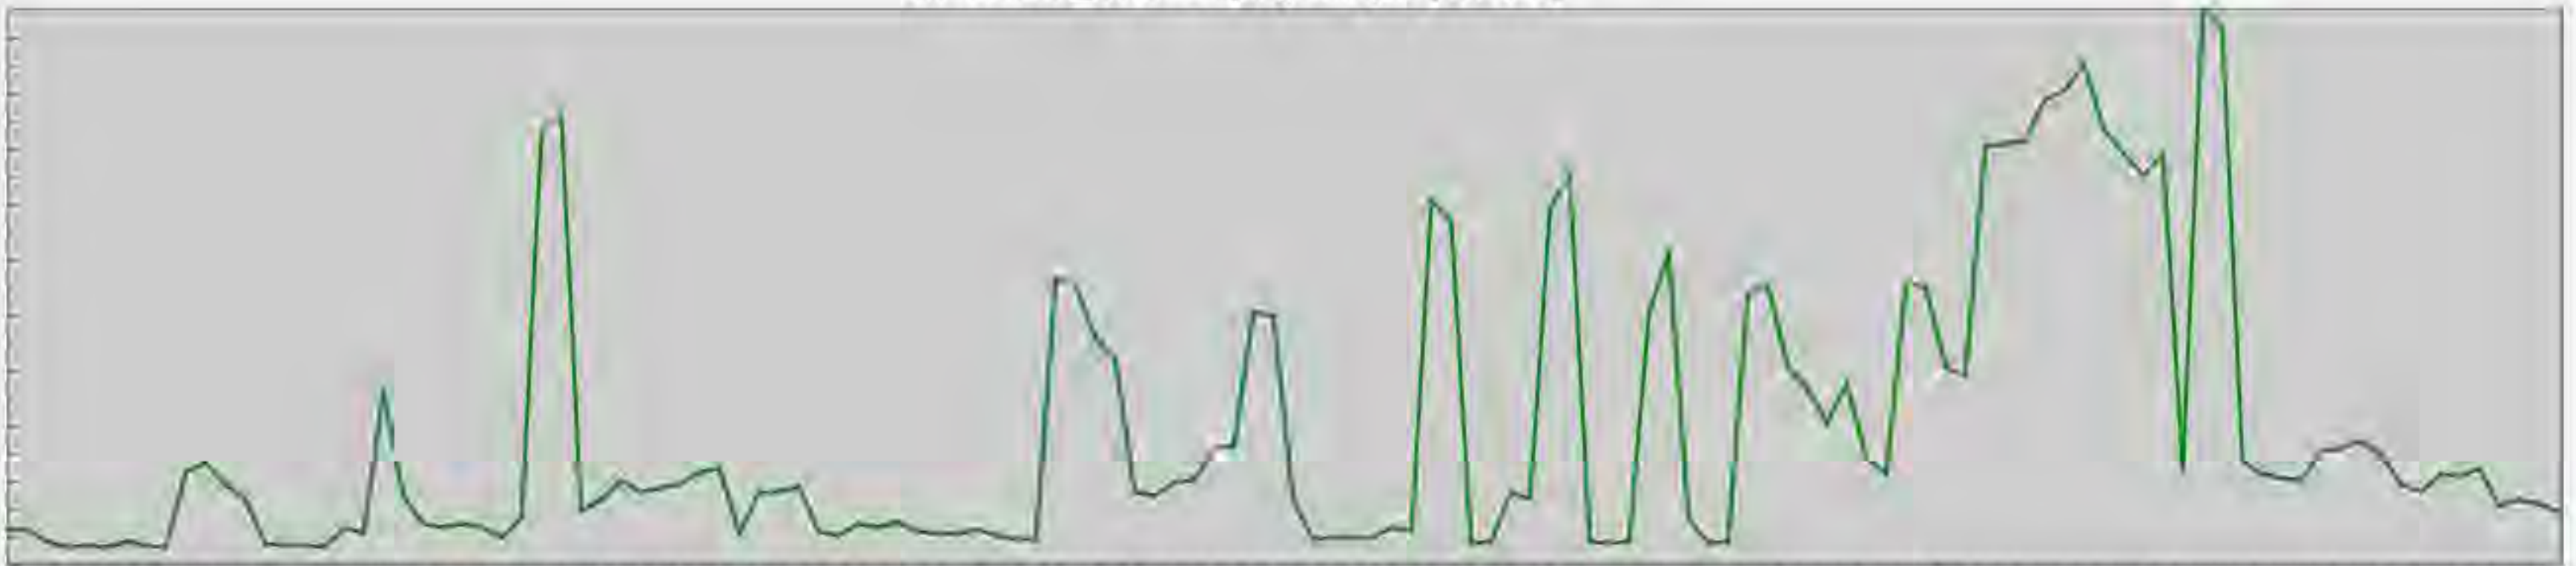

01-PP-M-cells\_GSM190789.CEL  
02-PP-M-cells\_GSM190790.CEL  
03-PP-M-cells\_GSM190791.CEL  
04-CT-v-M-cells\_GSM190792.CEL  
05-CT-v-M-cells\_GSM190793.CEL  
06-CT-v-M-cells\_GSM190794.CEL  
07-Ileum-IEC\_GSM190795.CEL  
08-Ileum-IEC\_GSM190796.CEL  
09-Ileum-IEC\_GSM190797.CEL  
10-FAE-RMPYE\_P002001.CEL  
11-FAE-RMPYE\_P002001.CEL  
12-Small-intestine-epithelium\_RMINEP001001.CEL  
13-Small-intestine-epithelium\_RMINEP002001.CEL  
14-Ileum-IEC\_GSM350371.CEL  
15-Colon-IEC-Gf\_GSM350375.CEL  
16-Colon-Vill\_GSM480362.CEL  
17-Colon-Vill\_GSM480363.CEL  
18-Colon-Vill\_GSM480364.CEL  
19-Colon-Crypt\_GSM480374.CEL  
20-Colon-Crypt\_GSM480375.CEL  
21-Paneth-cells\_GSM480375.CEL  
22-Paneth-cells\_GSM318589.CEL  
23-Paneth-cells\_GSM318590.CEL  
24-Paneth-cells\_GSM116350.CEL  
25-Paneth-cells\_GSM116359.CEL  
26-Paneth-cells-Gf-1-GSM116357.CEL  
27-Paneth-cells-Gf-1-GSM116358.CEL  
28-Bone marrow\_GSM258627.CEL  
29-Bone marrow\_GSM258627.CEL  
30-HSC\_GSM258770.CEL  
31-HSC\_GSM258770.CEL  
32-MEP\_GSM258770.CEL  
33-MEP\_GSM258770.CEL  
34-MEP\_GSM258770.CEL  
35-MEP\_GSM258770.CEL  
36-MEP\_GSM258770.CEL  
37-MEP\_GSM258770.CEL  
38-Granulocytes\_GSM258667.CEL  
39-Granulocytes\_GSM258667.CEL  
40-Mast-cells\_GSM258711.CEL  
41-Mast-cells\_GSM258711.CEL  
42-Mast-cells-Gf-GSM258713.CEL  
43-Mast-cells-Gf-GSM258714.CEL  
44-Mast-cells-Gf+Ad-GSM258718.CEL  
45-Mast-cells-Gf+Ad-GSM258718.CEL  
46-NK-cells\_GSM258731.CEL  
47-NK-cells\_GSM258731.CEL  
48-CD8a+DC\_GSM258645.CEL  
49-CD8a+DC\_GSM258645.CEL  
50-CD8a-DC\_GSM258647.CEL  
51-CD8a-DC\_GSM258647.CEL  
52-Plasmacytoid-DC\_GSM258650.CEL  
53-Plasmacytoid-DC\_GSM258650.CEL  
54-BMM-GSM258694.CEL  
55-BMM-GSM258694.CEL  
56-BMM-LPS-6h-GSM258700.CEL  
57-BMM-LPS-6h-GSM258700.CEL  
58-BMM-LPS-7h-GSM258702.CEL  
59-BMM-LPS-7h-GSM258702.CEL  
60-PM-Microglia\_GSM258721.CEL  
61-PM-Microglia\_GSM258721.CEL  
62-PM-Microglia\_GSM258721.CEL  
63-Osteoclasts\_GSM258743.CEL  
64-Osteoclasts\_GSM258744.CEL  
65-Thymocyte-DN\_GSM465595.CEL  
66-Thymocyte-DN\_GSM465595.CEL  
67-T-cells-CD4+\_GSM258773.CEL  
68-T-cells-CD4+\_GSM258773.CEL  
69-T-cells-CD8+\_GSM258774.CEL  
70-T-cells-CD8+\_GSM258774.CEL  
71-Tregs\_GSM258778.CEL  
72-Tregs\_GSM258778.CEL  
73-Tregs\_GSM258778.CEL  
74-BAF3\_GSM258620.CEL  
75-BAF3\_GSM258620.CEL  
76-MZ-Bcell\_GSM258622.CEL  
77-MZ-Bcell\_GSM258622.CEL  
78-Follicular-Bcells\_GSM258664.CEL  
79-Follicular-Bcells\_GSM258664.CEL  
80-FLY-RMLNDC002001.CEL  
81-PP-FDC\_GSM481976.CEL  
82-PP-FDC\_GSM481976.CEL  
83-PP-FDC\_GSM481977.CEL  
84-Lymph-endo-cells\_GSM143704.CEL  
85-MS-1\_GSM234692.CEL  
86-LTcell\_GSM465596.CEL  
87-Nat Helper cell\_GSM465593.CEL  
88-Nat Helper cell\_GSM465594.CEL  
89-Chondrocytes\_GSM266740.CEL  
90-Chondrocytes\_GSM266741.CEL  
91-Osteoblast-d5\_GSM258741.CEL  
92-Osteoblast-d5\_GSM258742.CEL  
93-Osteoblast-d14\_GSM258737.CEL  
94-Osteoblast-d14\_GSM258737.CEL  
95-Osteoblast-d21\_GSM258739.CEL  
96-Osteoblast-d21\_GSM258739.CEL  
97-10T12\_GSM258631.CEL  
98-10T12\_GSM258631.CEL  
99-3T3-L1\_GSM258609.CEL  
100-3T3-L1\_GSM258610.CEL  
101-NH3T3\_GSM258729.CEL  
102-NH3T3\_GSM258730.CEL  
103-C2C12\_GSM258629.CEL  
104-Bruce4\_GSM258690.CEL  
105-Bruce4\_GSM258690.CEL  
106-MIMCD3\_GSM258723.CEL  
107-MIMCD3\_GSM258723.CEL  
108-MIMCD3\_GSM258724.CEL  
109-mim6\_GSM258725.CEL  
110-mim6\_GSM258725.CEL  
111-Astrocytes\_GSM241898.CEL  
112-Astrocytes\_GSM241898.CEL  
113-Spleen\_GSM258767.CEL  
114-Spleen\_GSM258767.CEL  
115-Lymph-nodes\_GSM258691.CEL  
116-Lymph-nodes\_GSM258691.CEL  
117-Lymph-nodes\_GSM258691.CEL  
118-Intestine-small\_GSM258677.CEL  
119-Intestine-small\_GSM258677.CEL  
120-Intestine-large\_GSM258678.CEL  
121-Intestine-large\_GSM258678.CEL  
122-Colon-d4\_GSM198101.CEL  
123-Colon-d4\_GSM198101.CEL  
124-Colon-d9\_GSM198103.CEL  
125-Colon-d9\_GSM198103.CEL  
126-NALT\_GSM289408.CEL  
127-NALT\_GSM289408.CEL  
128-NALT\_GSM289409.CEL  
129-NALT\_GSM289410.CEL  
130-NALT\_GSM289411.CEL







Cluster0214\_Uncertain-low in many (9 nodes)

102.2  
96.8  
91.4  
86.1  
80.7  
75.3  
69.9  
64.5  
59.2  
53.8  
48.4  
43  
37.7  
32.3  
26.9  
21.5  
16.1  
10.8  
5.4  
0

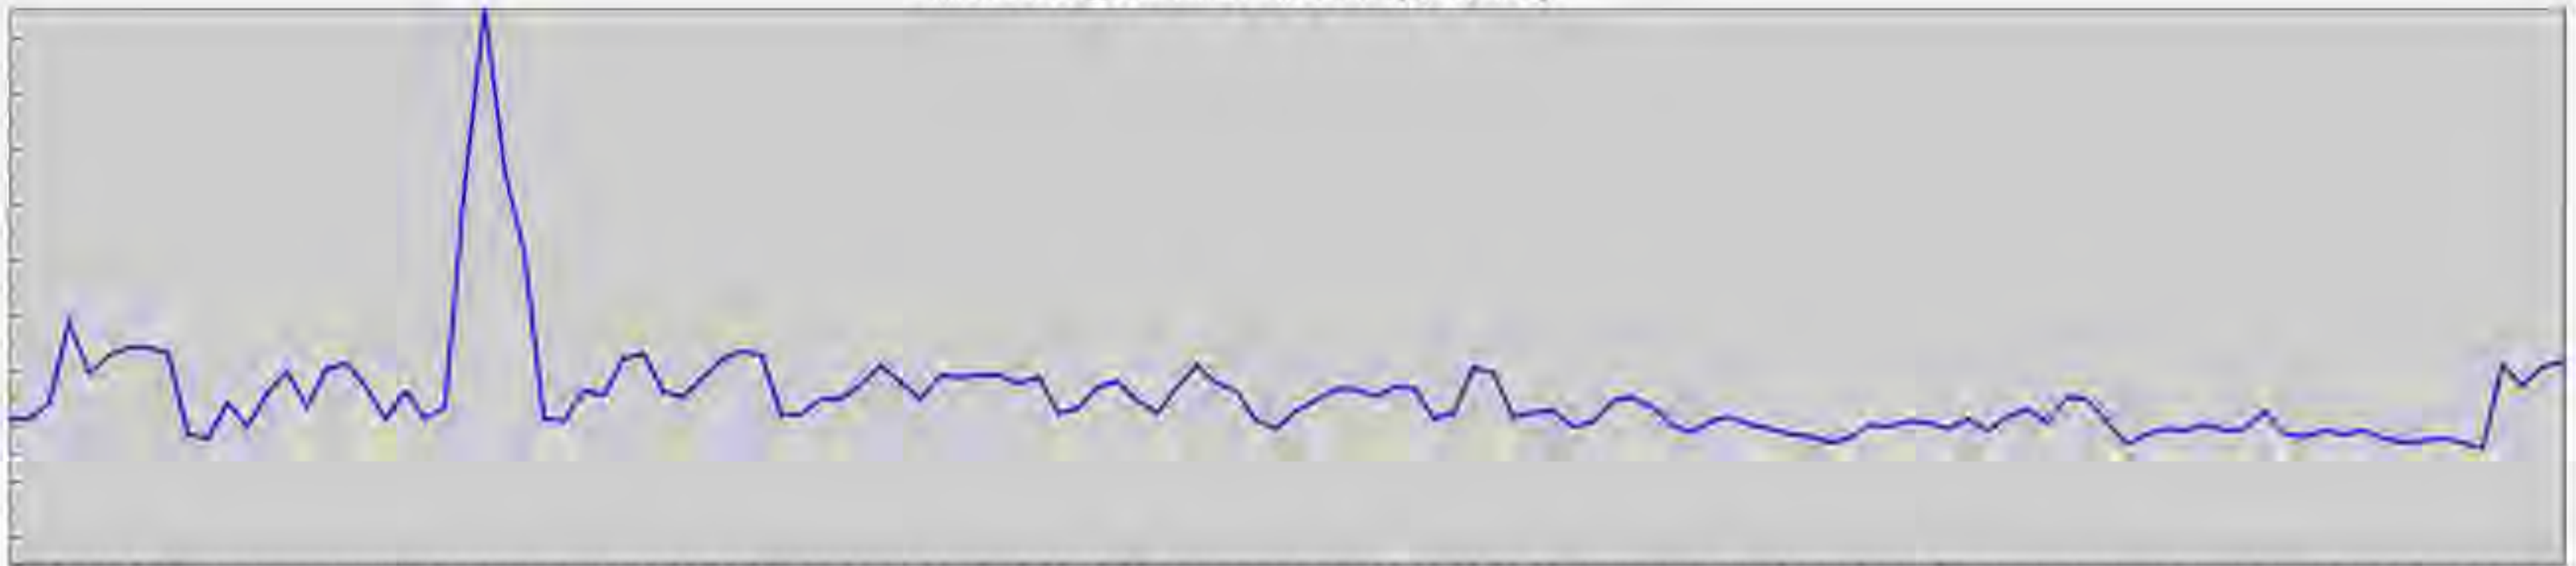

130-NALT GSM289411.CEL  
129-NALT GSM289410.CEL  
128-NALT GSM289409.CEL  
127-NALT GSM289408.CEL  
126-Column-d9 GSM1988105.CEL  
125-Column-d9 GSM1988104.CEL  
124-Column-d9 GSM1988103.CEL  
123-Column-d4 GSM1988102.CEL  
122-Column-d4 GSM1988101.CEL  
121-Intestine-large GSM258676.CEL  
120-Intestine-large GSM258675.CEL  
119-Intestine-small GSM258678.CEL  
118-Intestine-small GSM258692.CEL  
117-Lymph-nodes GSM258691.CEL  
116-Lymph-nodes GSM258726.CEL  
115-Spleen GSM258767.CEL  
114-Spleen GSM258767.CEL  
113-Neuro2a GSM258728.CEL  
112-Neuro2a GSM258727.CEL  
111-Astrocytes GSM241898.CEL  
110-mim6 GSM258726.CEL  
109-mim6 GSM258725.CEL  
108-MIMCD3 GSM258724.CEL  
107-MIMCD3 GSM258723.CEL  
106-Bruce4 GSM258656.CEL  
105-Bruce4 GSM258656.CEL  
104-C2C12 GSM258690.CEL  
103-C2C12 GSM258629.CEL  
102-NH3T3 GSM258739.CEL  
101-NH3T3 GSM258739.CEL  
100-3T3-L1 GSM258610.CEL  
99-3T3-L1 GSM258609.CEL  
98-10T12 GSM258632.CEL  
97-10T12 GSM258631.CEL  
96-Osteoblast-d21 GSM258740.CEL  
95-Osteoblast-d21 GSM258739.CEL  
94-Osteoblast-d14 GSM258738.CEL  
93-Osteoblast-d14 GSM258737.CEL  
92-Osteoblast-d5 GSM258742.CEL  
91-Osteoblast-d5 GSM258741.CEL  
90-Chondrocytes GSM266741.CEL  
89-Chondrocytes GSM266740.CEL  
88-Nat Helper cell GSM465594.CEL  
87-Nat Helper cell GSM465593.CEL  
86-TT cell GSM465596.CEL  
85-MS-1 GSM234692.CEL  
84-Lymph-endo-cells GSM143704.CEL  
83-PP-FDC GSM481977.CEL  
82-PP-FDC GSM481978.CEL  
81-PP-FDC GSM481976.CEL  
80-F-LY RMLNDCC003001.CEL  
79-F-LY RMLNDCC003001.CEL  
78-Follicular-Bcells GSM258664.CEL  
77-Follicular-Bcells GSM258663.CEL  
76-MZ-Bcell GSM258627.CEL  
75-MZ-Bcell GSM258627.CEL  
74-BAF3 GSM258620.CEL  
73-BAF3 GSM258619.CEL  
72-Tregs GSM258778.CEL  
71-Tregs GSM258777.CEL  
70-T-cells-CD8+ GSM258776.CEL  
69-T-cells-CD8+ GSM258774.CEL  
68-T-cells-CD4+ GSM258773.CEL  
67-T-cells-CD4+ GSM258773.CEL  
66-Thymocyte-DN GSM465595.CEL  
65-Osteoclasts GSM258743.CEL  
64-Microglia GSM258721.CEL  
62-Microglia GSM258721.CEL  
61-PM-M-PS-7h GSM268706.CEL  
60-PM-M-PS-7h GSM268705.CEL  
59-PM-M-PS-6h GSM258702.CEL  
58-PM-M-PS-6h GSM258702.CEL  
57-BMM-LPS-6h GSM258699.CEL  
56-BMM-LPS-6h GSM258699.CEL  
55-BMM-LPS-6h GSM258699.CEL  
54-BMM-LPS-6h GSM258699.CEL  
53-Iasmacryoid-DC GSM258650.CEL  
52-Iasmacryoid-DC GSM258649.CEL  
51-CD8a-DC GSM258647.CEL  
50-CD8a-DC GSM258647.CEL  
49-CD8a+DC GSM258646.CEL  
48-CD8a+DC GSM258646.CEL  
47-NK-cells GSM258737.CEL  
46-NK-cells GSM258737.CEL  
45-Mast-cells-IgE+Ad GSM258718.CEL  
44-Mast-cells-IgE+Ad GSM258717.CEL  
43-Mast-cells-IgE GSM258714.CEL  
42-Mast-cells-IgE GSM258713.CEL  
41-Mast-cells GSM258712.CEL  
40-Granulocytes GSM258668.CEL  
39-Granulocytes GSM258667.CEL  
38-GMP GSM258666.CEL  
37-GMP GSM258666.CEL  
36-GMP GSM258666.CEL  
35-GMP GSM258642.CEL  
34-GMP GSM258642.CEL  
33-MEP GSM258720.CEL  
32-MEP GSM258719.CEL  
31-HSC GSM258770.CEL  
30-HSC GSM258770.CEL  
29-Bone marrow GSM258628.CEL  
28-Bone marrow GSM258627.CEL  
27-paneth-cells-GF GSM116358.CEL  
26-paneth-cells-GF GSM116357.CEL  
25-paneth-cells GSM116350.CEL  
24-paneth-cells GSM116359.CEL  
23-paneth-cells GSM318589.CEL  
22-paneth-cells GSM318590.CEL  
21-Column-Crypt GSM480375.CEL  
20-Column-Crypt GSM480374.CEL  
19-Column-Vill GSM480363.CEL  
18-Column-Vill GSM480362.CEL  
17-Column-IEC-GF GSM349880.CEL  
16-Column-IEC-GF GSM350375.CEL  
15-Ileum-IEC-TGF GSM350376.CEL  
14-Ileum-IEC GSM350371.CEL  
13-Small-intestine-epithelium RMINEP002001.CEL  
12-Small-intestine-epithelium RMINEP001001.CEL  
11-FAE-RMPYEP002001.CEL  
10-FAE-RMPYEP001001.CEL  
09-Ileum-IEC GSM190797.CEL  
08-Ileum-IEC GSM190796.CEL  
07-Ileum-IEC GSM190795.CEL  
06-CT-v-M-cells GSM190794.CEL  
05-CT-v-M-cells GSM190793.CEL  
04-PP-M-cells GSM190792.CEL  
03-PP-M-cells GSM190791.CEL  
02-PP-M-cells GSM190790.CEL  
01-PP-M-cells GSM190789.CEL



Cluster0215\_Uncertain (9 nodes)

5,126.3  
4,856.5  
4,586.7  
4,316.9  
4,047.1  
3,777.3  
3,507.4  
3,237.6  
2,967.8  
2,698  
2,428.2  
2,158.4  
1,888.6  
1,618.8  
1,349  
1,079.2  
809.4  
539.6  
269.8  
0

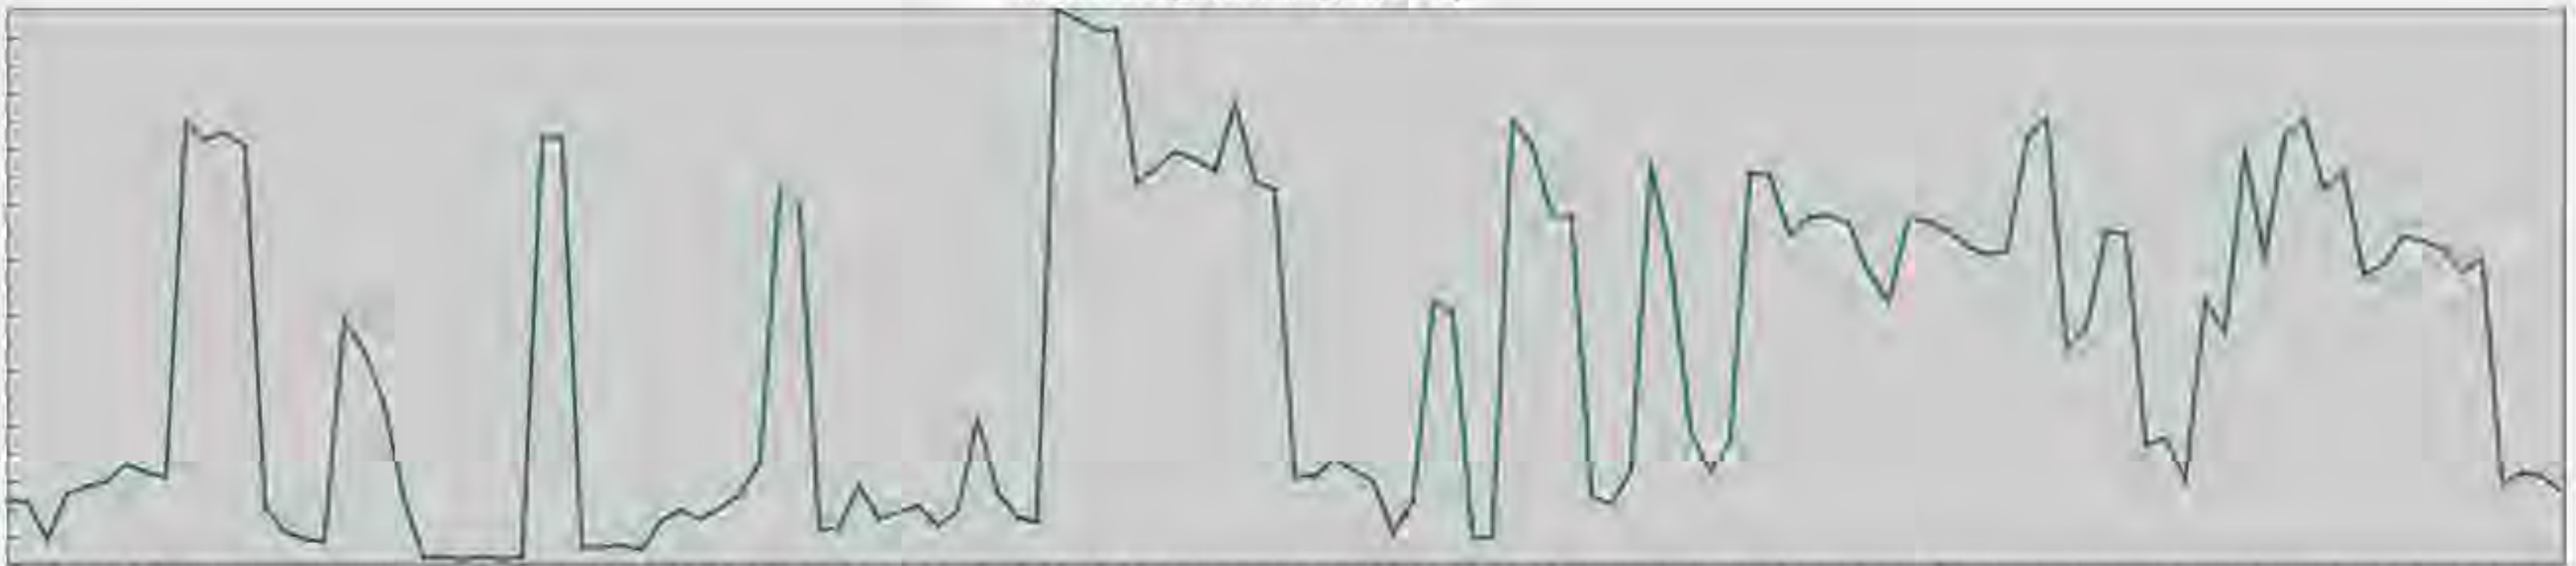

130-NALT GSM289411.CEL  
129-NALT GSM289410.CEL  
128-NALT GSM289409.CEL  
127-NALT GSM289408.CEL  
126- Colon-d9 GSM1988105.CEL  
125- Colon-d9 GSM1988104.CEL  
124- Colon-d9 GSM1988103.CEL  
123- Colon-d4 GSM1988102.CEL  
122- Colon-d4 GSM1988101.CEL  
121- Intestine-large GSM258676.CEL  
120- Intestine-large GSM258675.CEL  
119- Intestine-small GSM258678.CEL  
118- Intestine-small GSM258677.CEL  
117- Lymph-nodes GSM258691.CEL  
116- Lymph-nodes GSM258726.CEL  
115- Spleen GSM258766.CEL  
114- Spleen GSM258767.CEL  
113- Neuro2a GSM258728.CEL  
112- Neuro2a GSM258727.CEL  
111- Astrocytes GSM241898.CEL  
110- mimg GSM258725.CEL  
109- mimg GSM258724.CEL  
108- MIMCD3 GSM258723.CEL  
107- MIMCD3 GSM258722.CEL  
106- Bruce4 GSM258656.CEL  
105- Bruce4 GSM258655.CEL  
104- C2C12 GSM258690.CEL  
103- C2C12 GSM258689.CEL  
102- NIH3T3 GSM258739.CEL  
101- NIH3T3 GSM258738.CEL  
99- 3T3-L1 GSM258610.CEL  
98- 3T3-L1 GSM258609.CEL  
97- 10T12 GSM258631.CEL  
96- Osteoblast-d21 GSM258740.CEL  
95- Osteoblast-d21 GSM258739.CEL  
94- Osteoblast-d14 GSM258738.CEL  
93- Osteoblast-d14 GSM258737.CEL  
92- Osteoblast-d5 GSM258742.CEL  
91- Osteoblast-d5 GSM258741.CEL  
90- Chondrocytes GSM266741.CEL  
89- Chondrocytes GSM266740.CEL  
88- Nat Helper cell GSM465594.CEL  
87- Nat Helper cell GSM465593.CEL  
86- Tt cell GSM465596.CEL  
85- MS-1 GSM234692.CEL  
84- Lymph-endc-cells GSM143704.CEL  
83- PP-FDC GSM481977.CEL  
82- PP-FDC GSM481978.CEL  
81- PP-FDC GSM481976.CEL  
80- FLY RMLNDCC003001.CEL  
79- FLY RMLNDCC003001.CEL  
78- Follicular-Bcells GSM258664.CEL  
77- Follicular-Bcells GSM258663.CEL  
76- MZ-Bcell GSM258622.CEL  
75- MZ-Bcell GSM258621.CEL  
74- BAF3 GSM258620.CEL  
73- BAF3 GSM258619.CEL  
72- Tregs GSM258778.CEL  
71- Tregs GSM258777.CEL  
70- T-cells-CD8+ GSM258776.CEL  
69- T-cells-CD8+ GSM258775.CEL  
68- T-cells-CD4+ GSM258774.CEL  
67- T-cells-CD4+ GSM258773.CEL  
66- Thymocyte-DN GSM465595.CEL  
65- Osteoclasts GSM258744.CEL  
64- Osteoclasts GSM258743.CEL  
63- Microglia GSM258721.CEL  
62- Microglia GSM258721.CEL  
61- PMM-LPS-7h GSM258706.CEL  
60- PMM-LPS-7h GSM258705.CEL  
59- PMM-LPS-7d GSM258702.CEL  
58- PMM-LPS-6h GSM258701.CEL  
57- BMMLPS-6h GSM258699.CEL  
56- BMMLPS-6h GSM258699.CEL  
55- BMMLPS-6h GSM258699.CEL  
54- BMMLPS-6h GSM258699.CEL  
53- Plasmacytoid-DC GSM258650.CEL  
52- Plasmacytoid-DC GSM258649.CEL  
51- CD8a-DC GSM258647.CEL  
50- CD8a-DC GSM258647.CEL  
49- CD8a+DC GSM258646.CEL  
48- CD8a+DC GSM258645.CEL  
47- NK-cells GSM258732.CEL  
46- NK-cells GSM258731.CEL  
45- Mast-cells-IgE+Ad GSM258718.CEL  
44- Mast-cells-IgE+Ad GSM258717.CEL  
43- Mast-cells-IgE GSM258714.CEL  
42- Mast-cells-IgE GSM258713.CEL  
41- Mast-cells GSM258712.CEL  
40- Granulocytes GSM258668.CEL  
39- Granulocytes GSM258667.CEL  
38- Granulocytes GSM258666.CEL  
37- GMP GSM258665.CEL  
36- GMP GSM258664.CEL  
35- CMP GSM258642.CEL  
34- CMP GSM258641.CEL  
33- MIEP GSM258720.CEL  
32- MIEP GSM258719.CEL  
31- H9C GSM258770.CEL  
30- H9C GSM258770.CEL  
29- Bone marrow GSM258628.CEL  
28- Bone marrow GSM258627.CEL  
27- Paneth-cells-GF GSM116358.CEL  
26- Paneth-cells-GF GSM116357.CEL  
25- Paneth-cells GSM116350.CEL  
24- Paneth-cells GSM116359.CEL  
23- Paneth-cells GSM318589.CEL  
22- Paneth-cells GSM318590.CEL  
21- Colon-Crypt GSM480375.CEL  
20- Colon-Crypt GSM480374.CEL  
19- Colon-Vill GSM480363.CEL  
18- Colon-Vill GSM480362.CEL  
17- Colon-IEC-GF GSM349880.CEL  
16- Colon-IEC-GF GSM350375.CEL  
15- Ileum-IEC-GF GSM350376.CEL  
14- Ileum-IEC GSM350371.CEL  
13- Small-intestine-epithelium RMINEP002901.CEL  
12- Small-intestine-epithelium RMINEP001001.CEL  
11- FAE RMPYEP002001.CEL  
10- FAE RMPYEP001001.CEL  
09- Ileum-IEC GSM190797.CEL  
08- Ileum-IEC GSM190796.CEL  
07- Ileum-IEC GSM190795.CEL  
06- CT-v-M-cells GSM190794.CEL  
05- CT-v-M-cells GSM190793.CEL  
04- CT-v-M-cells GSM190792.CEL  
03- PP-M-cells GSM190791.CEL  
02- PP-M-cells GSM190790.CEL  
01- PP-M-cells GSM190789.CEL



Cluster0216\_House keeping-ribosomal (9 nodes)

12,884.9  
12,206.8  
11,528.6  
10,850.5  
10,172.3  
9,494.2  
8,816  
8,137.9  
7,459.7  
6,781.5  
6,103.4  
5,425.2  
4,747.1  
4,068.9  
3,390.8  
2,712.6  
2,034.5  
1,356.3  
678.2  
0

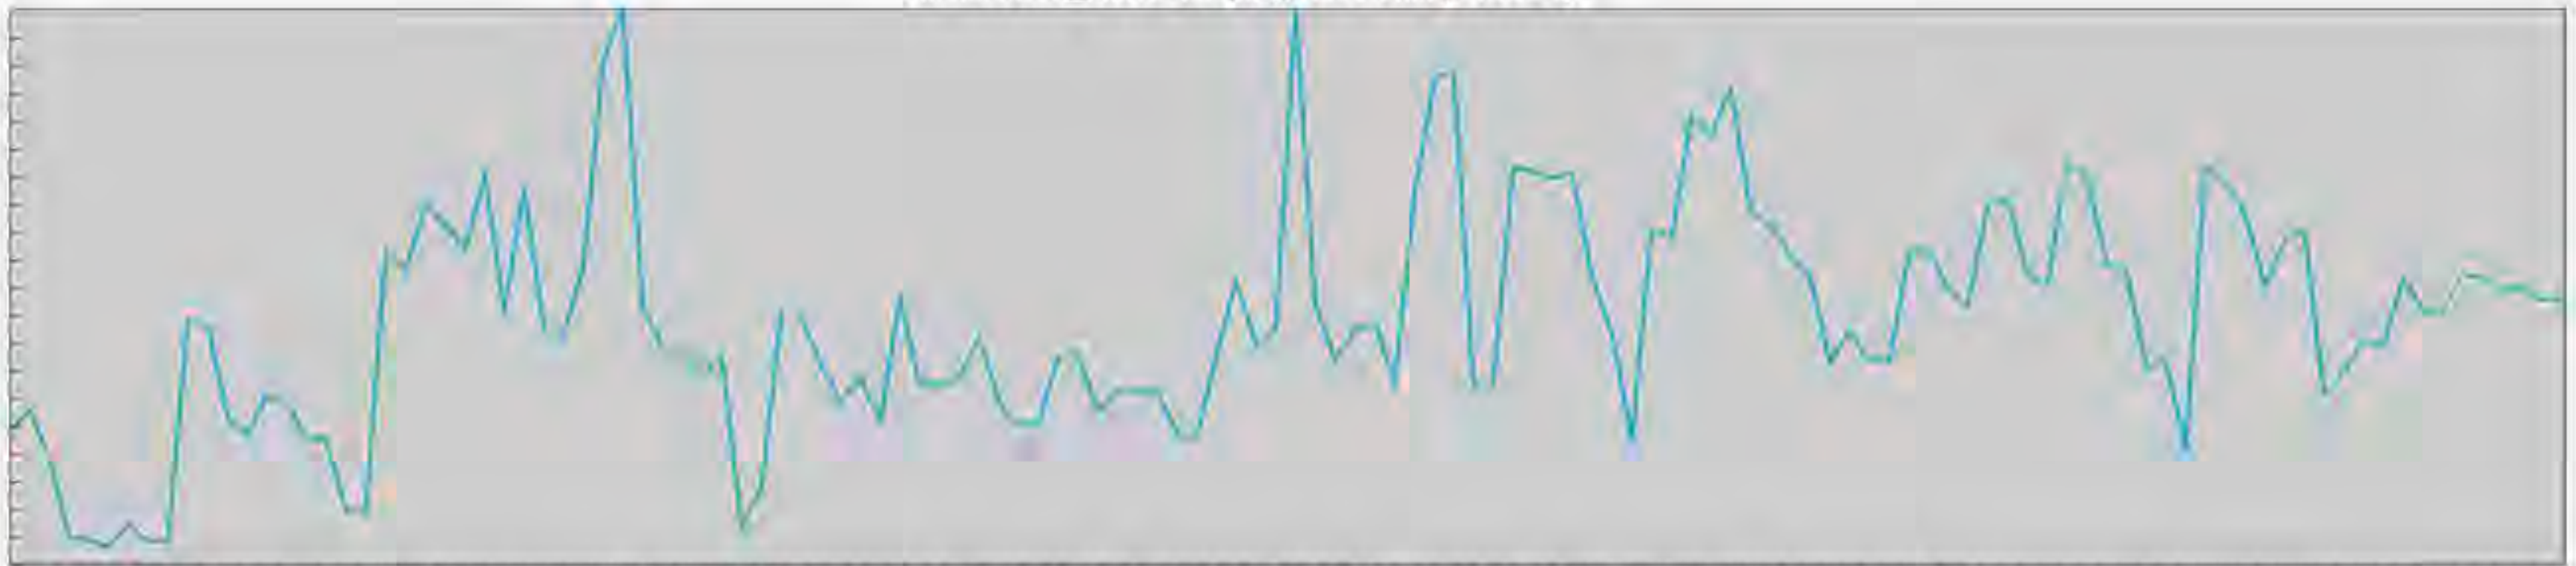

130-NALT GSM289411.CEL  
129-NALT GSM289410.CEL  
128-NALT GSM289409.CEL  
127-NALT GSM289408.CEL  
126-Colon-d9 GSM1988105.CEL  
125-Colon-d9 GSM1988104.CEL  
124-Colon-d9 GSM1988103.CEL  
123-Colon-d4 GSM1988102.CEL  
122-Colon-d4 GSM1988101.CEL  
121-Intestine-large GSM258676.CEL  
120-Intestine-large GSM258675.CEL  
119-Intestine-small GSM258678.CEL  
118-Intestine-small GSM258677.CEL  
117-Lymph-nodes GSM258691.CEL  
116-Lymph-nodes GSM258692.CEL  
115-Spleen GSM258766.CEL  
114-Spleen GSM258767.CEL  
113-Neuro2a GSM258728.CEL  
112-Neuro2a GSM258727.CEL  
111-Astrocytes GSM241898.CEL  
110-ming GSM258726.CEL  
109-ming GSM258725.CEL  
108-MIMCD3 GSM258724.CEL  
107-MIMCD3 GSM258723.CEL  
106-Bruce4 GSM258656.CEL  
105-Bruce4 GSM258655.CEL  
104-C2C12 GSM258690.CEL  
103-C2C12 GSM258689.CEL  
102-NH3T3 GSM258739.CEL  
101-NH3T3 GSM258738.CEL  
100-3T3-L1 GSM258610.CEL  
99-3T3-L1 GSM258609.CEL  
98-10T12 GSM258632.CEL  
97-10T12 GSM258631.CEL  
96-Osteoblast-d21 GSM258740.CEL  
95-Osteoblast-d21 GSM258739.CEL  
94-Osteoblast-d14 GSM258738.CEL  
93-Osteoblast-d14 GSM258737.CEL  
92-Osteoblast-d5 GSM258742.CEL  
91-Osteoblast-d5 GSM258741.CEL  
90-Chondrocytes GSM266741.CEL  
89-Chondrocytes GSM266740.CEL  
88-Nat Helper cell GSM465594.CEL  
87-Nat Helper cell GSM465593.CEL  
86-LT cell GSM465596.CEL  
85-MS-1 GSM234692.CEL  
84-Lymph-endo-cells GSM143704.CEL  
83-Lymph-endo-cells GSM481977.CEL  
82-Lymph-endo-cells GSM481978.CEL  
81-Lymph-endo-cells GSM481976.CEL  
80-Lymph-endo-cells GSM481977.CEL  
79-Lymph-endo-cells GSM481978.CEL  
78-Follicular-Bcells GSM258664.CEL  
77-Follicular-Bcells GSM258663.CEL  
76-MZ-Bcell GSM258622.CEL  
75-MZ-Bcell GSM258621.CEL  
74-BAF3 GSM258620.CEL  
73-BAF3 GSM258619.CEL  
72-Tregs GSM258778.CEL  
71-Tregs GSM258777.CEL  
70-T-cells-CD8+ GSM258776.CEL  
69-T-cells-CD8+ GSM258775.CEL  
68-T-cells-CD4+ GSM258774.CEL  
67-T-cells-CD4+ GSM258773.CEL  
66-Thymocyte-DN GSM465595.CEL  
65-Osteoclasts GSM258744.CEL  
64-Osteoclasts GSM258743.CEL  
63-Microglia GSM258721.CEL  
62-Microglia GSM258721.CEL  
61-PMN-LPS-7h GSM258706.CEL  
60-PMN-LPS-7h GSM258705.CEL  
59-PMN-LPS-7d GSM258702.CEL  
58-PMN-LPS-7d GSM258701.CEL  
57-BMM-LPS-6h GSM258700.CEL  
56-BMM-LPS-6h GSM258699.CEL  
55-BMM-LPS-6h GSM258699.CEL  
54-BMM-LPS-6h GSM258699.CEL  
53-Plasmacytoid-DC GSM258650.CEL  
52-Plasmacytoid-DC GSM258649.CEL  
51-CD8a-DC GSM258648.CEL  
50-CD8a-DC GSM258647.CEL  
49-CD8a+DC GSM258646.CEL  
48-CD8a+DC GSM258645.CEL  
47-NK-cells GSM258732.CEL  
46-NK-cells GSM258731.CEL  
45-Mast-cells-IgE+Ad GSM258718.CEL  
44-Mast-cells-IgE+Ad GSM258717.CEL  
43-Mast-cells-IgE GSM258714.CEL  
42-Mast-cells-IgE GSM258713.CEL  
41-Mast-cells GSM258712.CEL  
40-Granulocytes GSM258668.CEL  
39-Granulocytes GSM258667.CEL  
38-Granulocytes GSM258666.CEL  
37-GMP GSM258665.CEL  
36-GMP GSM258664.CEL  
35-GMP GSM258642.CEL  
34-GMP GSM258641.CEL  
33-MEP GSM258720.CEL  
32-MEP GSM258719.CEL  
31-HESC GSM258770.CEL  
30-HESC GSM258769.CEL  
29-Bone marrow GSM258628.CEL  
28-Bone marrow GSM258627.CEL  
27-Paneth-cells-GF GSM116357.CEL  
26-Paneth-cells-GF-1 GSM116357.CEL  
25-Paneth-cells GSM116350.CEL  
24-Paneth-cells GSM116359.CEL  
23-Paneth-cells GSM318589.CEL  
22-Paneth-cells GSM318590.CEL  
21-Colon-Crypt GSM480375.CEL  
20-Colon-Crypt GSM480374.CEL  
19-Colon-Vill GSM480363.CEL  
18-Colon-Vill GSM480362.CEL  
17-Colon-IEC-GF GSM349880.CEL  
16-Colon-IEC-GF GSM350375.CEL  
15-Ileum-IEC-GF GSM350376.CEL  
14-Ileum-IEC-GF GSM350371.CEL  
13-Small-intestine-epithelium RMINEP002901.CEL  
12-Small-intestine-epithelium RMINEP001001.CEL  
11-FAE-RMPYEP002001.CEL  
10-FAE-RMPYEP001001.CEL  
09-Ileum-IEC GSM190797.CEL  
08-Ileum-IEC GSM190796.CEL  
07-Ileum-IEC GSM190795.CEL  
06-CT-v-M-cells GSM190794.CEL  
05-CT-v-M-cells GSM190793.CEL  
04-CT-v-M-cells GSM190792.CEL  
03-PP-M-cells GSM190791.CEL  
02-PP-M-cells GSM190790.CEL  
01-PP-M-cells GSM190789.CEL



Cluster0217\_House keeping (9 nodes)

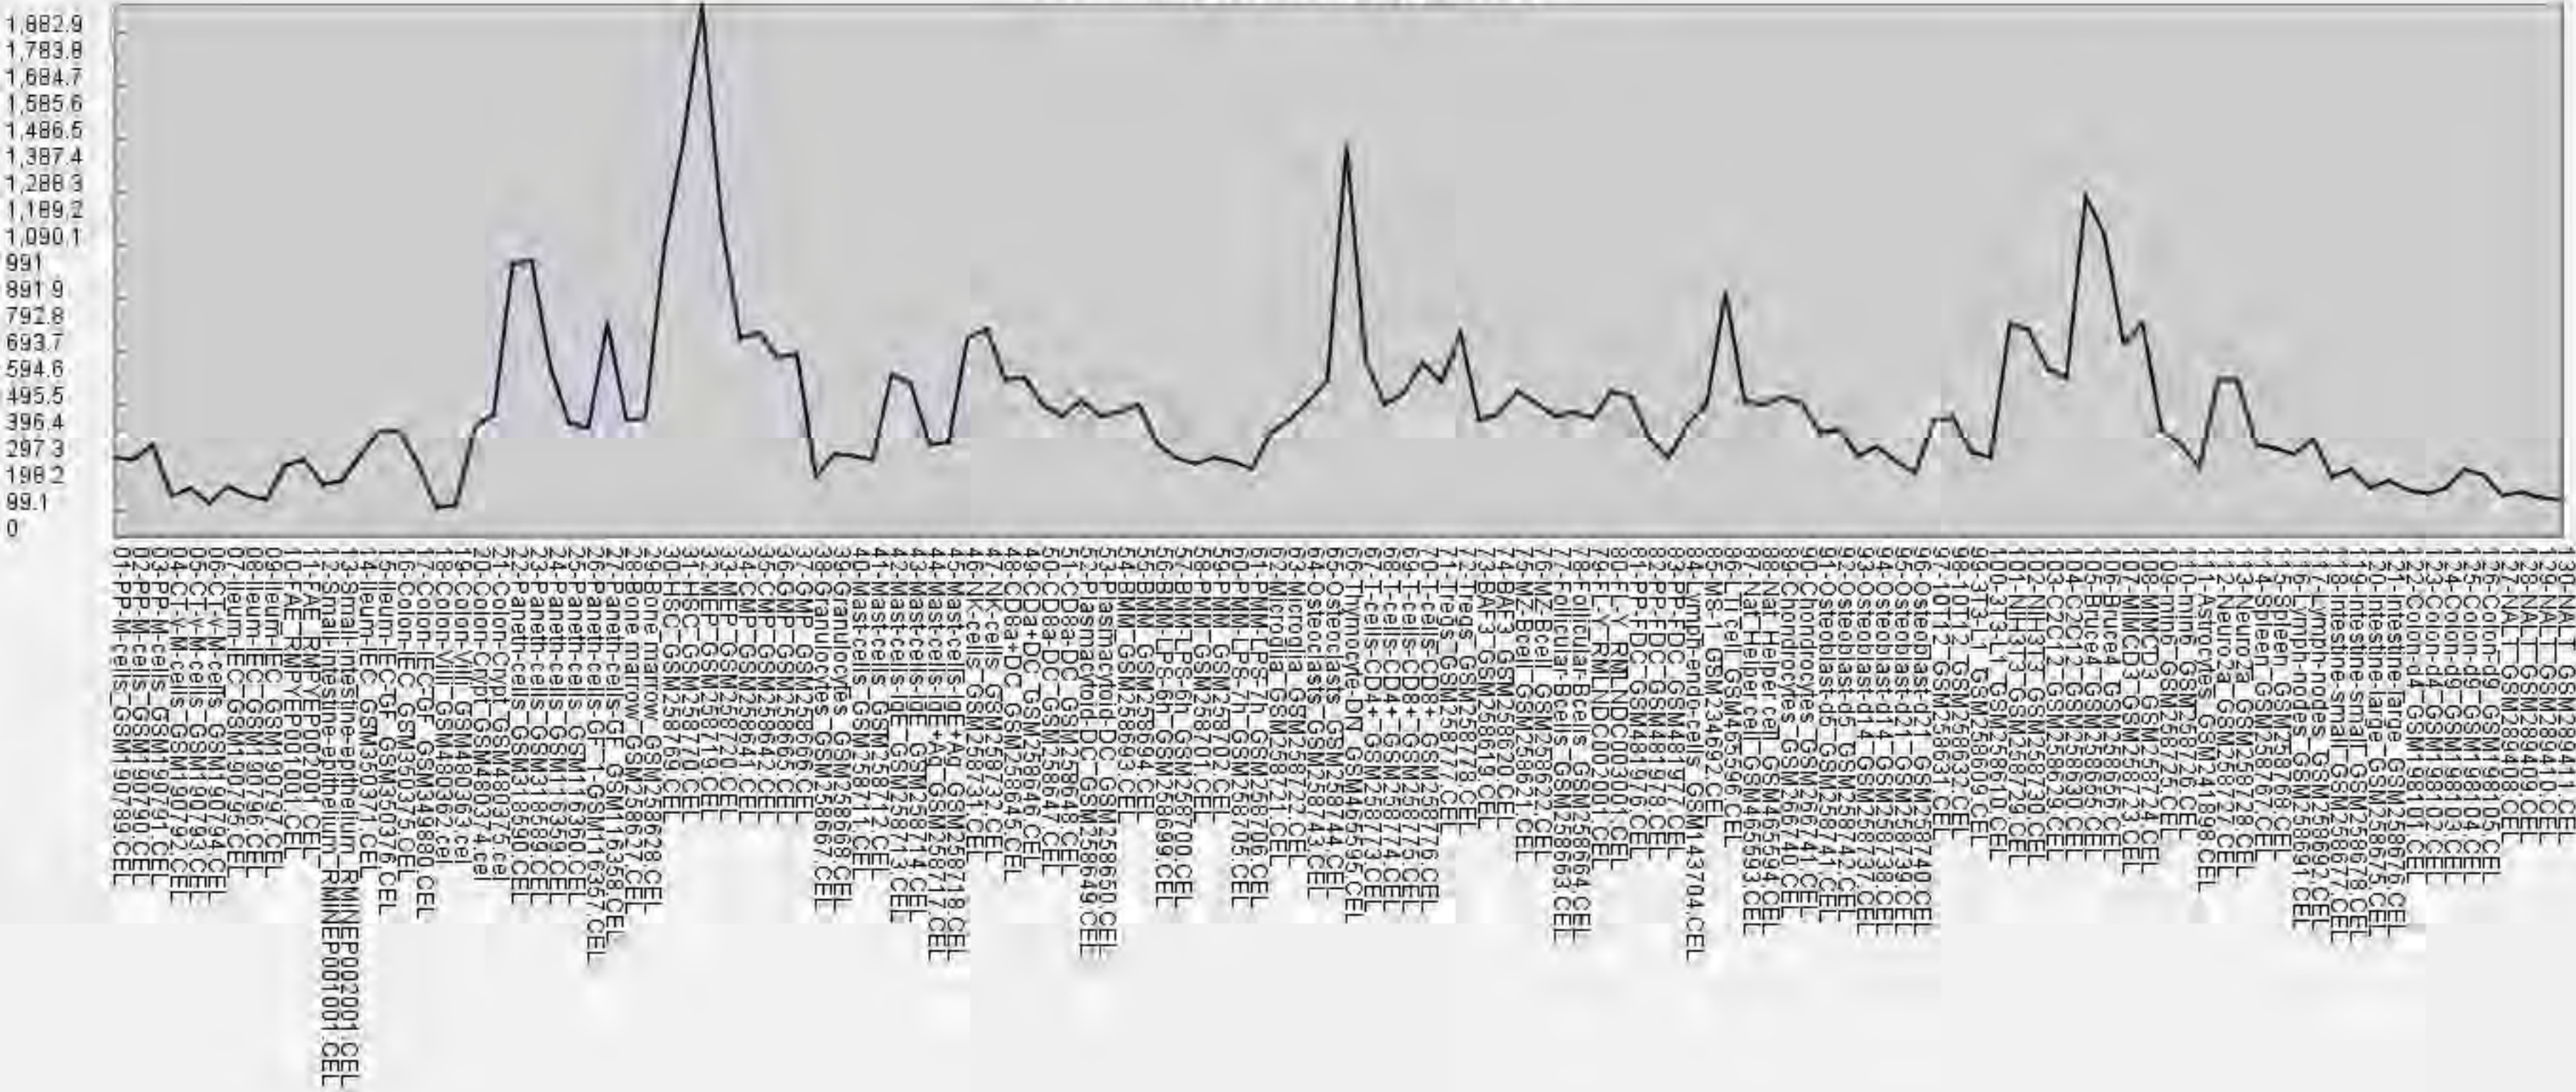



Cluster0218\_Uncertain (9 nodes)

1,984.9  
1,880.4  
1,776  
1,671.5  
1,567  
1,462.6  
1,358.1  
1,253.6  
1,149.2  
1,044.7  
940.2  
835.8  
731.3  
626.8  
522.3  
417.9  
313.4  
208.9  
104.5  
0

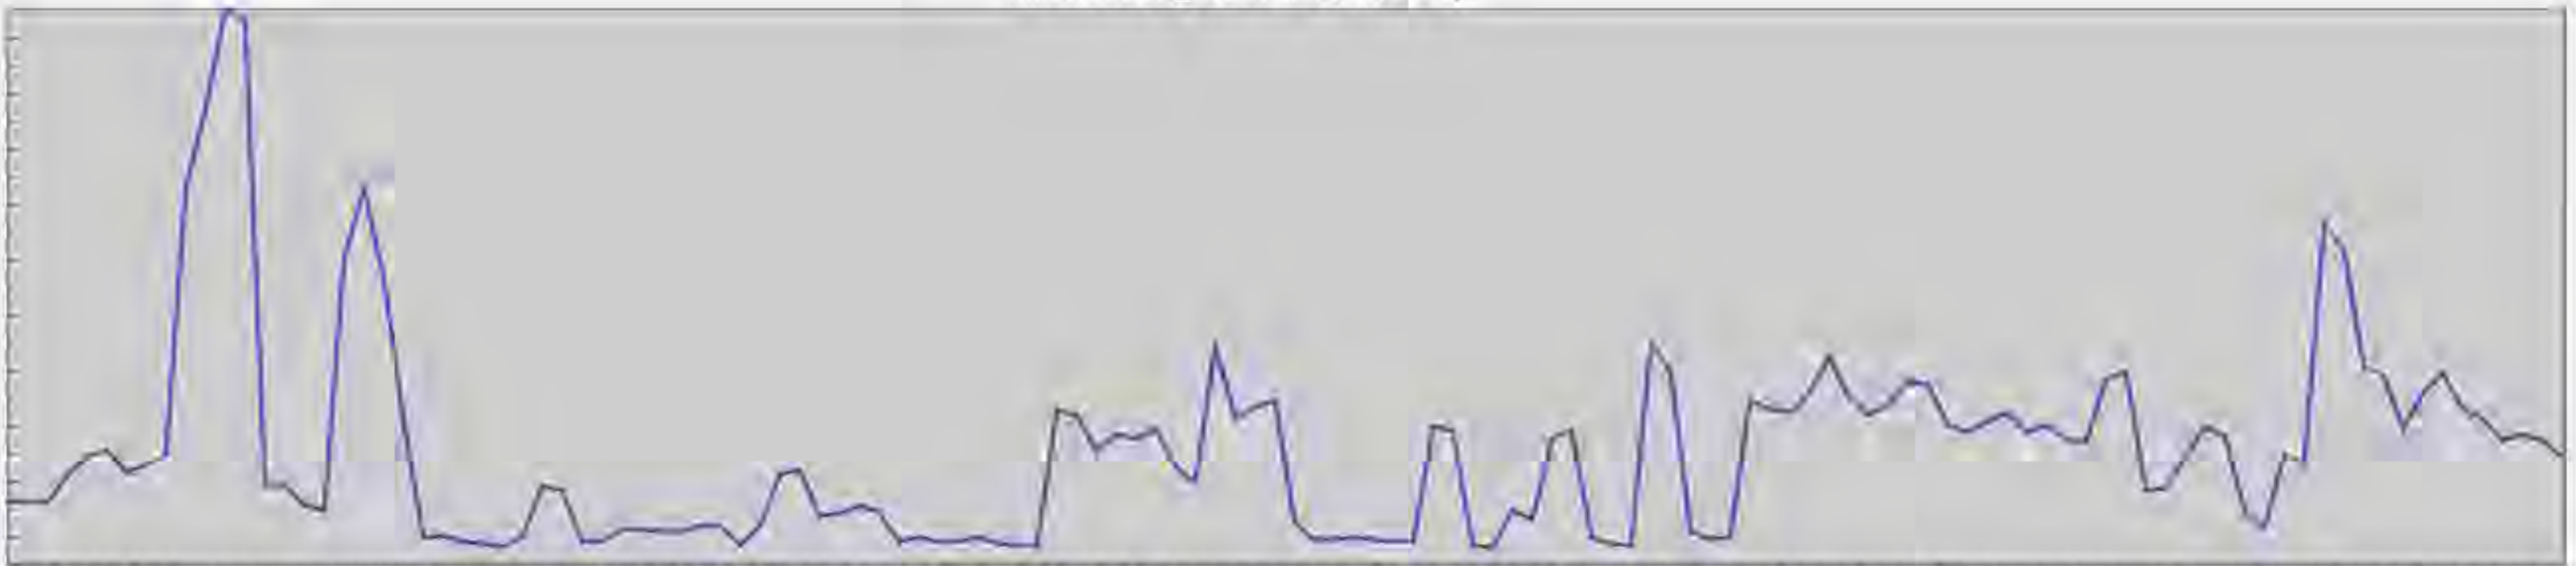

130-NALT GSM289411.CEL  
129-NALT GSM289410.CEL  
128-NALT GSM289409.CEL  
127-NALT GSM289408.CEL  
126-Colon-d9 GSM1988105.CEL  
125-Colon-d9 GSM1988104.CEL  
124-Colon-d9 GSM1988103.CEL  
123-Colon-d4 GSM1988102.CEL  
122-Colon-d4 GSM1988101.CEL  
121-Intestine-large GSM258676.CEL  
120-Intestine-large GSM258675.CEL  
119-Intestine-small GSM258674.CEL  
118-Intestine-small GSM258673.CEL  
117-Lymph-nodes GSM258672.CEL  
116-Lymph-nodes GSM258671.CEL  
115-Spleen GSM258767.CEL  
114-Spleen GSM258766.CEL  
113-Neuro2a GSM258728.CEL  
112-Neuro2a GSM258727.CEL  
111-Astrocytes GSM241898.CEL  
110-mim6 GSM258726.CEL  
109-mim6 GSM258725.CEL  
108-MIMCD3 GSM258724.CEL  
107-MIMCD3 GSM258723.CEL  
106-Bruce4 GSM258656.CEL  
105-Bruce4 GSM258655.CEL  
104-C2C12 GSM258690.CEL  
103-C2C12 GSM258689.CEL  
102-NH3T3 GSM258739.CEL  
101-NH3T3 GSM258738.CEL  
100-3T3-L1 GSM258610.CEL  
99-3T3-L1 GSM258609.CEL  
98-10T12 GSM258632.CEL  
97-10T12 GSM258631.CEL  
96-Osteoblast-d21 GSM258740.CEL  
95-Osteoblast-d21 GSM258739.CEL  
94-Osteoblast-d14 GSM258738.CEL  
93-Osteoblast-d14 GSM258737.CEL  
92-Osteoblast-d5 GSM258742.CEL  
91-Osteoblast-d5 GSM258741.CEL  
90-Chondrocytes GSM266741.CEL  
89-Chondrocytes GSM266740.CEL  
88-Nat Helper cell GSM465594.CEL  
87-Nat Helper cell GSM465593.CEL  
86-LT cell GSM465596.CEL  
85-MS-1 GSM234692.CEL  
84-Lymph-endo-cells GSM143704.CEL  
83-PP-FDC GSM481977.CEL  
82-PP-FDC GSM481976.CEL  
81-PP-FDC GSM481976.CEL  
80-F-LY RMLNDCC003001.CEL  
79-F-LY RMLNDCC003001.CEL  
78-Follicular-Bcells GSM258664.CEL  
77-Follicular-Bcells GSM258663.CEL  
76-MZ-Bcell GSM258622.CEL  
75-MZ-Bcell GSM258621.CEL  
74-BAF3 GSM258620.CEL  
73-BAF3 GSM258619.CEL  
72-Tregs GSM258778.CEL  
71-T-cells-CD8+ GSM258777.CEL  
70-T-cells-CD8+ GSM258776.CEL  
69-T-cells-CD8+ GSM258775.CEL  
68-T-cells-CD4+ GSM258774.CEL  
67-T-cells-CD4+ GSM258773.CEL  
66-Thymocyte-DN GSM465595.CEL  
65-Osteoclasts GSM258743.CEL  
64-Microglia GSM258721.CEL  
63-Microglia GSM258721.CEL  
62-MM-LPS-7h GSM258706.CEL  
61-MM-LPS-7h GSM258705.CEL  
60-MM-LPS-7h GSM258702.CEL  
59-MM-LPS-6h GSM258701.CEL  
58-MM-LPS-6h GSM258699.CEL  
57-MM-LPS-6h GSM258699.CEL  
56-MM-LPS-6h GSM258699.CEL  
55-MM-LPS-6h GSM258699.CEL  
54-MM-LPS-6h GSM258699.CEL  
53-Plasmacytoid-DC GSM258650.CEL  
52-Plasmacytoid-DC GSM258649.CEL  
51-CD8a-DC GSM258648.CEL  
50-CD8a-DC GSM258647.CEL  
49-CD8a+DC GSM258646.CEL  
48-CD8a+DC GSM258645.CEL  
47-NK-cells GSM258732.CEL  
46-NK-cells GSM258731.CEL  
45-Mast-cells-IgE+Ad GSM258718.CEL  
44-Mast-cells-IgE+Ad GSM258717.CEL  
43-Mast-cells-IgE GSM258714.CEL  
42-Mast-cells-IgE GSM258713.CEL  
41-Mast-cells GSM258712.CEL  
40-Granulocytes GSM258668.CEL  
39-Granulocytes GSM258667.CEL  
38-GMP GSM258666.CEL  
37-GMP GSM258665.CEL  
36-GMP GSM258664.CEL  
35-CMP GSM258642.CEL  
34-CMP GSM258641.CEL  
33-MEP GSM258720.CEL  
32-MEP GSM258719.CEL  
31-HSC GSM258770.CEL  
30-HSC GSM258769.CEL  
29-Bone marrow GSM258628.CEL  
28-Bone marrow GSM258627.CEL  
27-Paneth-cells-GE GSM116358.CEL  
26-Paneth-cells-GE GSM116357.CEL  
25-Paneth-cells GSM116350.CEL  
24-Paneth-cells GSM116359.CEL  
23-Paneth-cells GSM318589.CEL  
22-Paneth-cells GSM318590.CEL  
21-Colon-Crypt GSM480375.CEL  
20-Colon-Crypt GSM480374.CEL  
19-Colon-Vill GSM480363.CEL  
18-Colon-Vill GSM480362.CEL  
17-Colon-IEC-GE GSM349880.CEL  
16-Colon-IEC-GE GSM350375.CEL  
15-Ileum-IEC-TGF GSM350376.CEL  
14-Ileum-IEC GSM350371.CEL  
13-Small intestine-epithelium RMINEP002001.CEL  
12-Small intestine-epithelium RMINEP001001.CEL  
11-FAE-RMPYEP002001.CEL  
10-FAE-RMPYEP001001.CEL  
09-Ileum-IEC GSM190797.CEL  
08-Ileum-IEC GSM190796.CEL  
07-Ileum-IEC GSM190795.CEL  
06-CT-v-M-cells GSM190794.CEL  
05-CT-v-M-cells GSM190793.CEL  
04-PP-M-cells GSM190792.CEL  
03-PP-M-cells GSM190791.CEL  
02-PP-M-cells GSM190790.CEL  
01-PP-M-cells GSM190789.CEL



Cluster0219\_intestine-related (9 nodes)

5,922.1  
5,610.4  
5,298.7  
4,987  
4,675.3  
4,363.6  
4,062  
3,740.3  
3,428.6  
3,118.9  
2,805.2  
2,493.5  
2,181.8  
1,870.1  
1,558.4  
1,246.8  
935.1  
823.4  
311.7  
0

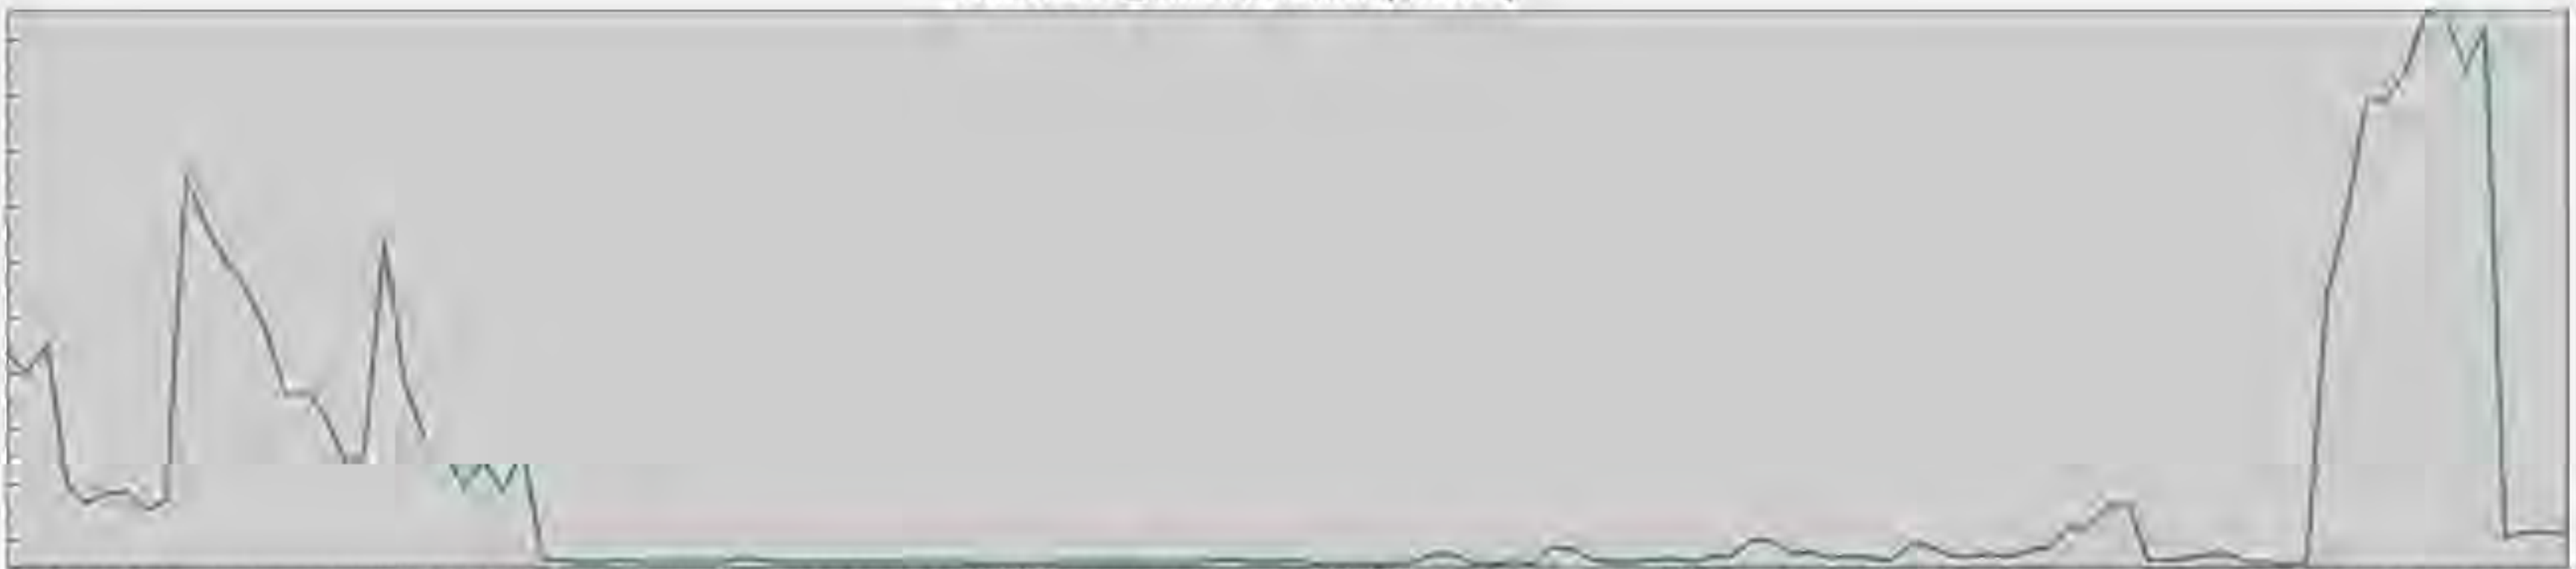

130-NALT GSM289411.CEL  
129-NALT GSM289410.CEL  
128-NALT GSM289409.CEL  
127-NALT GSM289408.CEL  
126-Colon-d9 GSM1988105.CEL  
125-Colon-d9 GSM1988104.CEL  
124-Colon-d9 GSM1988103.CEL  
123-Colon-d4 GSM1988102.CEL  
122-Colon-d4 GSM1988101.CEL  
121-Intestine-large GSM258676.CEL  
120-Intestine-large GSM258675.CEL  
119-Intestine-small GSM258674.CEL  
118-Intestine-small GSM258673.CEL  
117-Lymph-nodes GSM258672.CEL  
116-Lymph-nodes GSM258671.CEL  
115-Spleen GSM258767.CEL  
114-Spleen GSM258766.CEL  
113-Neuro2a GSM258728.CEL  
112-Neuro2a GSM258727.CEL  
111-Astrocytes GSM241898.CEL  
110-mimb GSM258726.CEL  
109-mimb GSM258725.CEL  
108-MIMCD3 GSM258724.CEL  
107-MIMCD3 GSM258723.CEL  
106-Bruce4 GSM258665.CEL  
105-Bruce4 GSM258664.CEL  
104-C2C12 GSM258690.CEL  
103-C2C12 GSM258689.CEL  
102-NH3T3 GSM258730.CEL  
101-NH3T3 GSM258729.CEL  
100-3T3-L1 GSM258610.CEL  
99-3T3-L1 GSM258609.CEL  
98-10T12 GSM258632.CEL  
97-10T12 GSM258631.CEL  
96-Osteoblast-d21 GSM258740.CEL  
95-Osteoblast-d21 GSM258739.CEL  
94-Osteoblast-d14 GSM258738.CEL  
93-Osteoblast-d14 GSM258737.CEL  
92-Osteoblast-d5 GSM258742.CEL  
91-Osteoblast-d5 GSM258741.CEL  
90-Chondrocytes GSM266741.CEL  
89-Chondrocytes GSM266740.CEL  
88-Nat Helper cell GSM465594.CEL  
87-Nat Helper cell GSM465593.CEL  
86-TT cell GSM465596.CEL  
85-MS-1 GSM234692.CEL  
84-Lymph-endo-cells GSM143704.CEL  
83-PP-FDC GSM481977.CEL  
82-PP-FDC GSM481978.CEL  
81-PP-FDC GSM481976.CEL  
80-D-LY RMLNDCC003001.CEL  
79-E-LY RMLNDCC003001.CEL  
78-Follicular-Bcells GSM258664.CEL  
77-Follicular-Bcells GSM258663.CEL  
76-MZ-Bcell GSM258622.CEL  
75-MZ-Bcell GSM258621.CEL  
74-BAF3 GSM258620.CEL  
73-BAF3 GSM258619.CEL  
72-Tregs GSM258778.CEL  
71-Tregs GSM258777.CEL  
70-T-cells-CD8+ GSM258776.CEL  
69-T-cells-CD8+ GSM258775.CEL  
68-T-cells-CD4+ GSM258774.CEL  
67-T-cells-CD4+ GSM258773.CEL  
66-Thymocyte-DN GSM465595.CEL  
65-Osteoclasts GSM258743.CEL  
64-Osteoclasts GSM258744.CEL  
63-Microglia GSM258721.CEL  
62-Microglia GSM258721.CEL  
61-MM-LPS-7h GSM258706.CEL  
60-MM-LPS-7h GSM258706.CEL  
59-MM-LPS-6h GSM258702.CEL  
58-MM-LPS-6h GSM258701.CEL  
57-MM-LPS-6h GSM258699.CEL  
56-MM-LPS-6h GSM258699.CEL  
55-MM-LPS-6h GSM258694.CEL  
54-MM-LPS-6h GSM258694.CEL  
53-Iasmacryoid-DC GSM258650.CEL  
52-Iasmacryoid-DC GSM258649.CEL  
51-CD8a-DC GSM258648.CEL  
50-CD8a-DC GSM258647.CEL  
49-CD8a+DC GSM258646.CEL  
48-CD8a+DC GSM258645.CEL  
47-NK-cells GSM258732.CEL  
46-NK-cells GSM258731.CEL  
45-Mast-cells-IgE+Ad GSM258719.CEL  
44-Mast-cells-IgE+Ad GSM258717.CEL  
43-Mast-cells-IgE GSM258714.CEL  
42-Mast-cells-IgE GSM258713.CEL  
41-Mast-cells GSM258712.CEL  
40-Granulocytes GSM258667.CEL  
39-Granulocytes GSM258666.CEL  
38-GMP GSM258665.CEL  
37-GMP GSM258665.CEL  
36-GMP GSM258664.CEL  
35-GMP GSM258664.CEL  
34-MEP GSM258872.CEL  
33-MEP GSM258871.CEL  
32-MEP GSM258871.CEL  
31-HSC GSM258870.CEL  
30-HSC GSM258870.CEL  
29-Bone marrow GSM258869.CEL  
28-Bone marrow GSM258868.CEL  
27-paneth-cells-GF-1 GSM116357.CEL  
26-paneth-cells-GF-1 GSM116350.CEL  
25-paneth-cells GSM116350.CEL  
24-paneth-cells GSM116359.CEL  
23-paneth-cells GSM318589.CEL  
22-paneth-cells GSM318590.CEL  
21-paneth-cells GSM480375.CEL  
20-paneth-cells GSM480374.CEL  
19-paneth-cells GSM480363.CEL  
18-paneth-cells GSM480362.CEL  
17-paneth-cells GSM349880.CEL  
16-paneth-cells GSM350375.CEL  
15-paneth-cells GSM350376.CEL  
14-paneth-cells GSM350371.CEL  
13-paneth-cells GSM258627.CEL  
12-paneth-cells GSM258627.CEL  
11-paneth-cells GSM116358.CEL  
10-paneth-cells GSM116357.CEL  
9-paneth-cells GSM116357.CEL  
8-paneth-cells GSM116357.CEL  
7-paneth-cells GSM116357.CEL  
6-paneth-cells GSM116357.CEL  
5-paneth-cells GSM116357.CEL  
4-paneth-cells GSM116357.CEL  
3-paneth-cells GSM116357.CEL  
2-paneth-cells GSM116357.CEL  
1-paneth-cells GSM116357.CEL



Cluster0220\_ Extracellular matrix (9 nodes)

12,231  
11,587.3  
10,943.5  
10,299.8  
9,656  
9,012.3  
8,368.6  
7,724.8  
7,081.1  
6,437.4  
5,793.6  
5,149.9  
4,506.2  
3,862.4  
3,218.7  
2,574.9  
1,931.2  
1,287.5  
643.7  
0

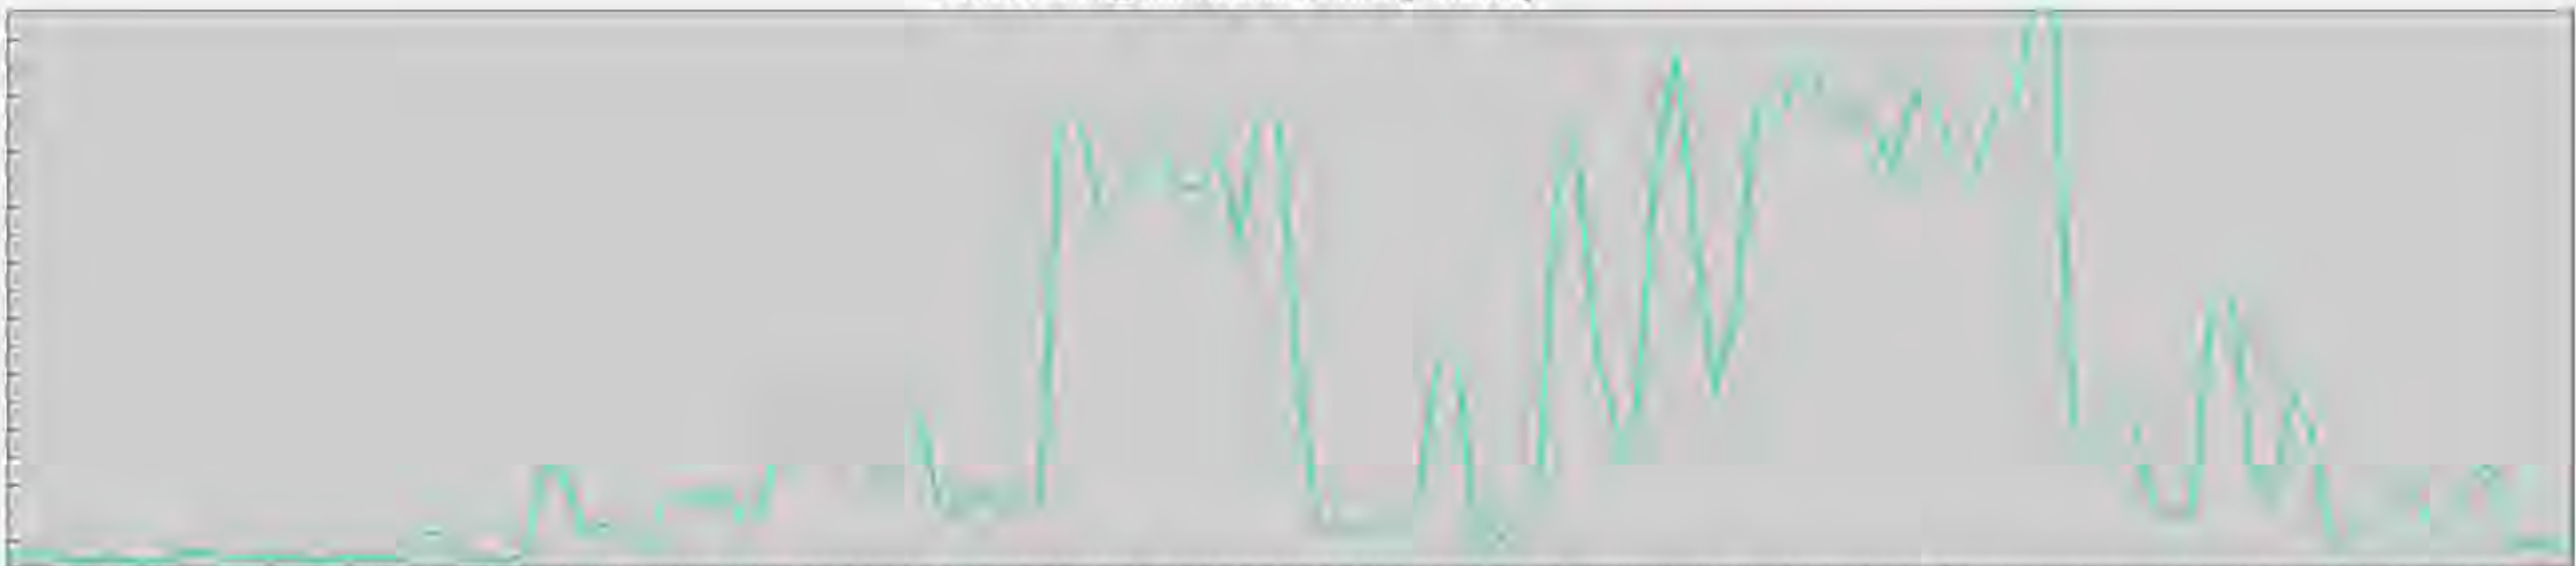

130- NALT GSM289411 CELL  
129- NALT GSM289410 CELL  
128- NALT GSM289409 CELL  
127- NALT GSM289408 CELL  
126- Colon-d9 GSM1988105 CELL  
125- Colon-d9 GSM1988104 CELL  
124- Colon-d9 GSM1988103 CELL  
123- Colon-d4 GSM1988102 CELL  
122- Colon-d4 GSM1988101 CELL  
121- Intestine-large GSM258676 CELL  
120- Intestine-large GSM258675 CELL  
119- Intestine-small GSM258674 CELL  
118- Intestine-small GSM258673 CELL  
117- Lymph-nodes GSM258672 CELL  
116- Lymph-nodes GSM258671 CELL  
115- Spleen GSM258768 CELL  
114- Spleen GSM258767 CELL  
113- Neuro2a GSM258728 CELL  
112- Neuro2a GSM258727 CELL  
111- Astrocytes GSM241898 CELL  
110- mimg GSM258726 CELL  
109- mimg GSM258725 CELL  
108- MIMCD3 GSM258724 CELL  
107- MIMCD3 GSM258723 CELL  
106- Bruce4 GSM258656 CELL  
105- Bruce4 GSM258655 CELL  
104- C2C12 GSM258690 CELL  
103- C2C12 GSM258689 CELL  
102- NIH3T3 GSM258739 CELL  
101- NIH3T3 GSM258738 CELL  
100- 3T3-L1 GSM258610 CELL  
99- 3T3-L1 GSM258609 CELL  
98- 10T1/2 GSM258632 CELL  
97- 10T1/2 GSM258631 CELL  
96- Osteoblast-d21 GSM258740 CELL  
95- Osteoblast-d21 GSM258739 CELL  
94- Osteoblast-d14 GSM258738 CELL  
93- Osteoblast-d14 GSM258737 CELL  
92- Osteoblast-d5 GSM258742 CELL  
91- Osteoblast-d5 GSM258741 CELL  
90- Chondrocytes GSM266741 CELL  
89- Chondrocytes GSM266740 CELL  
88- Nat Helper cell GSM465594 CELL  
87- Nat Helper cell GSM465593 CELL  
86- T cell GSM465596 CELL  
85- MS-1 GSM234692 CELL  
84- Lymph-endo-cells GSM143704 CELL  
83- PP-FDC GSM481977 CELL  
82- PP-FDC GSM481978 CELL  
81- PP-FDC GSM481976 CELL  
80- FLY RMLNDCC003001 CELL  
79- FLY RMLNDCC003001 CELL  
78- Follicular-Bcells GSM258664 CELL  
77- Follicular-Bcells GSM258663 CELL  
76- MZ-Bcell GSM258622 CELL  
75- MZ-Bcell GSM258621 CELL  
74- BAF3 GSM258620 CELL  
73- BAF3 GSM258619 CELL  
72- Tregs GSM258778 CELL  
71- Tregs GSM258777 CELL  
70- T-cells-CD8+ GSM258776 CELL  
69- T-cells-CD8+ GSM258775 CELL  
68- T-cells-CD4+ GSM258774 CELL  
67- T-cells-CD4+ GSM258773 CELL  
66- Thymocyte-DN GSM465595 CELL  
65- Osteoclasts GSM258744 CELL  
64- Osteoclasts GSM258743 CELL  
63- Microglia GSM258721 CELL  
62- Microglia GSM258721 CELL  
61- PMM-LPS-7h GSM258706 CELL  
60- PMM-LPS-7h GSM258705 CELL  
59- PMM-LPS-7d GSM258702 CELL  
58- PMM-LPS-6h GSM258701 CELL  
57- BMM-LPS-6h GSM258699 CELL  
56- BMM-LPS-6h GSM258699 CELL  
55- BMM-LPS-6h GSM258699 CELL  
54- BMM-LPS-6h GSM258699 CELL  
53- Plasmacytoid-DC GSM258650 CELL  
52- CD8a-DC GSM258648 CELL  
51- CD8a-DC GSM258647 CELL  
50- CD8a-DC GSM258647 CELL  
49- CD8a+DC GSM258646 CELL  
48- CD8a+DC GSM258646 CELL  
47- NK-cells GSM258732 CELL  
46- NK-cells GSM258731 CELL  
45- Mast-cells-IgE+Ad GSM258718 CELL  
44- Mast-cells-IgE+Ad GSM258717 CELL  
43- Mast-cells-IgE GSM258714 CELL  
42- Mast-cells-IgE GSM258713 CELL  
41- Mast-cells GSM258712 CELL  
40- Granulocytes GSM258668 CELL  
39- Granulocytes GSM258667 CELL  
38- GMP GSM258666 CELL  
37- GMP GSM258665 CELL  
36- GMP GSM258665 CELL  
35- CMP GSM258642 CELL  
34- CMP GSM258641 CELL  
33- MIEP GSM258720 CELL  
32- MIEP GSM258719 CELL  
31- HSC GSM258770 CELL  
30- HSC GSM258769 CELL  
29- Bone marrow GSM258628 CELL  
28- Bone marrow GSM258627 CELL  
27- Paneth-cells-GF-1 GSM116357 CELL  
26- Paneth-cells-GF-1 GSM116350 CELL  
25- Paneth-cells GSM116350 CELL  
24- Paneth-cells GSM116359 CELL  
23- Paneth-cells GSM318589 CELL  
22- Paneth-cells GSM318590 CELL  
21- Colon-Crypt GSM480375 CELL  
20- Colon-Crypt GSM480374 CELL  
19- Colon-Vill GSM480363 CELL  
18- Colon-Vill GSM480362 CELL  
17- Colon-IEC-GF GSM349880 CELL  
16- Colon-IEC-GF GSM350375 CELL  
15- Ileum-IEC-GF GSM350376 CELL  
14- Ileum-IEC GSM350371 CELL  
13- Small-intestine-epithelium RMINEP002901 CELL  
12- Small-intestine-epithelium RMINEP001001 CELL  
11- FAE RMPYEP002001 CELL  
10- FAE RMPYEP001001 CELL  
09- Ileum-IEC GSM190797 CELL  
08- Ileum-IEC GSM190796 CELL  
07- Ileum-IEC GSM190795 CELL  
06- CT-v-M-cells GSM190794 CELL  
05- CT-v-M-cells GSM190793 CELL  
04- CT-v-M-cells GSM190792 CELL  
03- PP-M-cells GSM190791 CELL  
02- PP-M-cells GSM190790 CELL  
01- PP-M-cells GSM190789 CELL



Cluster0221\_Uncertain (9 nodes)

1,312.4  
 1,243.9  
 1,174.2  
 1,105.2  
 1,036.1  
 967  
 897.9  
 828.9  
 759.8  
 690.7  
 621.6  
 552.6  
 483.5  
 414.4  
 345.4  
 276.3  
 207.2  
 138.1  
 69.1  
 0

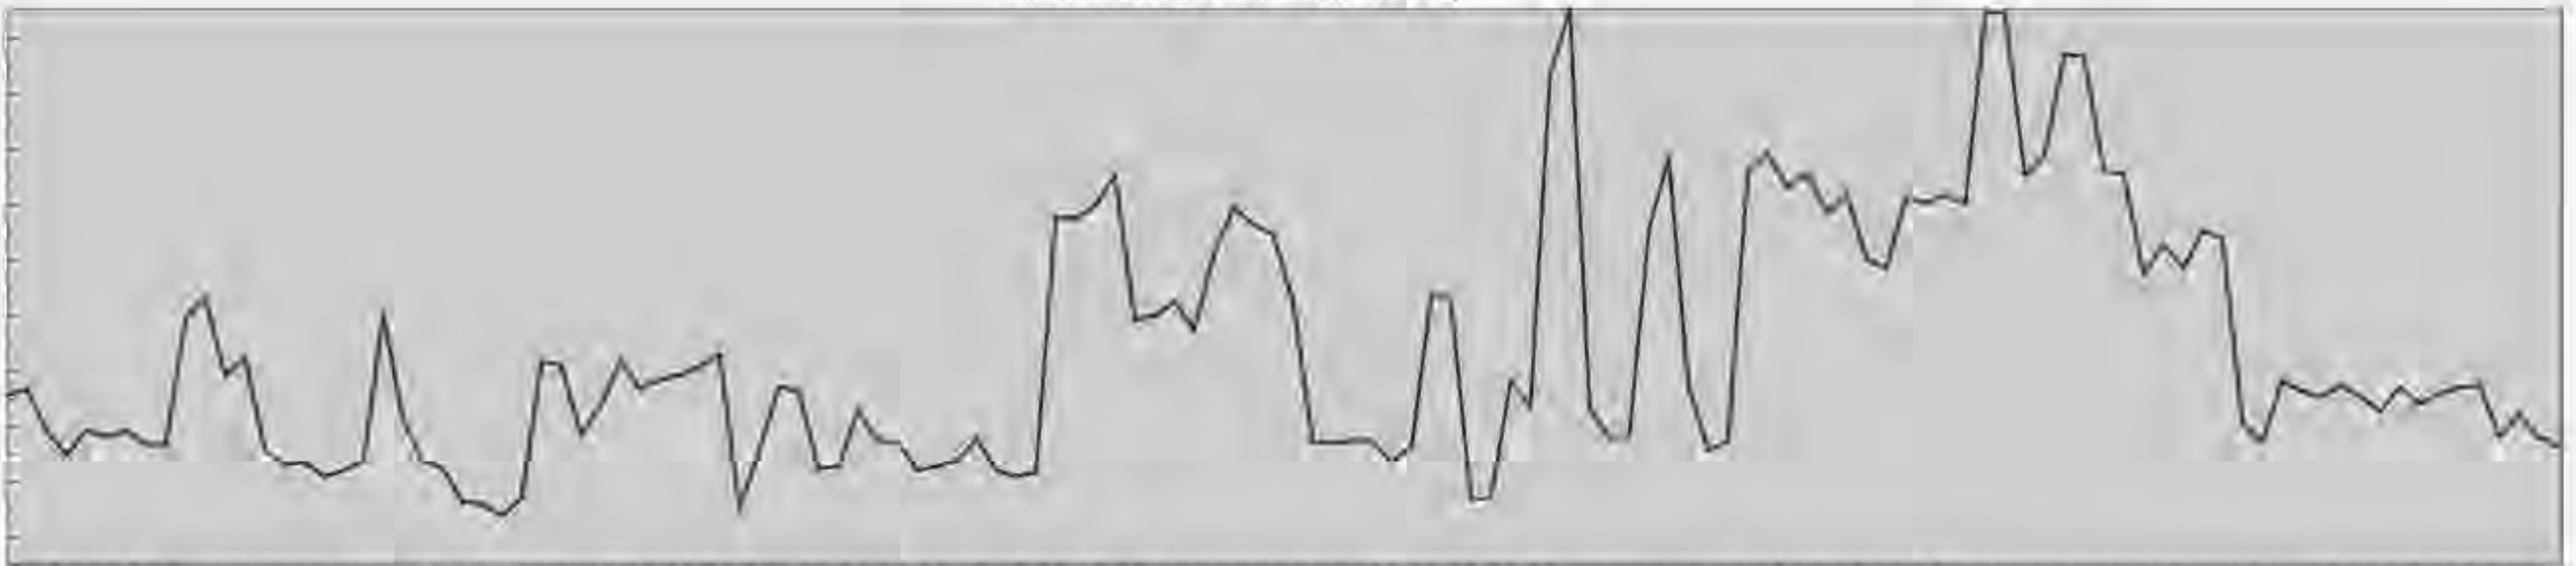

130-NALT GSM2899411.CEL  
 129-NALT GSM2899410.CEL  
 128-NALT GSM2899409.CEL  
 127-NALT GSM2899408.CEL  
 126-Color-d9 GSM1988105.CEL  
 125-Color-d9 GSM1988104.CEL  
 124-Color-d9 GSM1988103.CEL  
 123-Color-d4 GSM1988102.CEL  
 122-Color-d4 GSM1988101.CEL  
 121-Intestine-large GSM258676.CEL  
 120-Intestine-large GSM258675.CEL  
 119-Intestine-small GSM258674.CEL  
 118-Intestine-small GSM258673.CEL  
 117-Lymph-nodes GSM258672.CEL  
 116-Lymph-nodes GSM258671.CEL  
 115-Spleen GSM258767.CEL  
 114-Spleen GSM258766.CEL  
 113-Neuro2a GSM258729.CEL  
 112-Neuro2a GSM258728.CEL  
 111-Astrocytes GSM241898.CEL  
 110-mimb GSM258726.CEL  
 109-mimb GSM258725.CEL  
 108-MIMCD3 GSM258724.CEL  
 107-MIMCD3 GSM258723.CEL  
 106-Bruce4 GSM258656.CEL  
 105-Bruce4 GSM258655.CEL  
 104-C2C12 GSM258690.CEL  
 103-C2C12 GSM258689.CEL  
 102-NH3T3 GSM258739.CEL  
 101-NH3T3 GSM258738.CEL  
 100-3T3-L1 GSM258610.CEL  
 99-3T3-L1 GSM258609.CEL  
 98-10T12 GSM258632.CEL  
 97-10T12 GSM258631.CEL  
 96-Osteoblast-d21 GSM258740.CEL  
 95-Osteoblast-d14 GSM258739.CEL  
 94-Osteoblast-d14 GSM258738.CEL  
 93-Osteoblast-d14 GSM258737.CEL  
 92-Osteoblast-d5 GSM258742.CEL  
 91-Osteoblast-d5 GSM258741.CEL  
 90-Chondrocytes GSM266741.CEL  
 89-Chondrocytes GSM266740.CEL  
 88-Nat Helper cell GSM465594.CEL  
 87-Nat Helper cell GSM465593.CEL  
 86-TT cell GSM465596.CEL  
 85-MS-1 GSM234692.CEL  
 84-Lymph-endo-cells GSM143704.CEL  
 83-P.FDC GSM481977.CEL  
 82-P.FDC GSM481978.CEL  
 81-P.FDC GSM481976.CEL  
 80-L.Y.RMLND003001.CEL  
 79-L.Y.RMLND003001.CEL  
 78-Follicular-Bcells GSM258664.CEL  
 77-Follicular-Bcells GSM258663.CEL  
 76-MZ-Bcell GSM258627.CEL  
 75-MZ-Bcell GSM258627.CEL  
 74-BAF3 GSM258620.CEL  
 73-BAF3 GSM258619.CEL  
 72-Tregs GSM258778.CEL  
 71-Tregs GSM258777.CEL  
 70-T-cells-CD8+ GSM258776.CEL  
 69-T-cells-CD8+ GSM258774.CEL  
 68-T-cells-CD4+ GSM258773.CEL  
 67-T-cells-CD4+ GSM258744.CEL  
 66-Thymocyte-DN GSM465595.CEL  
 65-Osteoclasts GSM258743.CEL  
 64-Osteoclasts GSM258743.CEL  
 63-Microglia GSM258721.CEL  
 62-Microglia GSM258721.CEL  
 61-MM-LPS-7h GSM258706.CEL  
 60-MM-LPS-7h GSM258706.CEL  
 59-MM-LPS-6h GSM258702.CEL  
 58-MM-LPS-6h GSM258702.CEL  
 57-MM-LPS-6h GSM258699.CEL  
 56-MM-LPS-6h GSM258699.CEL  
 55-MM-LPS-6h GSM258699.CEL  
 54-MM-LPS-6h GSM258699.CEL  
 53-Ismacryoid-DC GSM258650.CEL  
 52-Ismacryoid-DC GSM258649.CEL  
 51-CD8a-DC GSM258647.CEL  
 50-CD8a-DC GSM258647.CEL  
 49-CD8a+DC GSM258646.CEL  
 48-CD8a+DC GSM258646.CEL  
 47-NK-cells GSM258732.CEL  
 46-NK-cells GSM258732.CEL  
 45-Mast-cells-IgE+Ad GSM258719.CEL  
 44-Mast-cells-IgE+Ad GSM258719.CEL  
 43-Mast-cells-IgE GSM258714.CEL  
 42-Mast-cells-IgE GSM258714.CEL  
 41-Mast-cells GSM258712.CEL  
 40-Granulocytes GSM258667.CEL  
 39-Granulocytes GSM258667.CEL  
 38-GMP GSM258666.CEL  
 37-GMP GSM258666.CEL  
 36-GMP GSM258666.CEL  
 35-GMP GSM258666.CEL  
 34-GMP GSM258666.CEL  
 33-MIEP GSM2588720.CEL  
 32-MIEP GSM2588720.CEL  
 31-HESC GSM258770.CEL  
 30-HESC GSM258770.CEL  
 29-Bone marrow GSM258628.CEL  
 28-Bone marrow GSM258627.CEL  
 27-paneth-cells-GE GSM116358.CEL  
 26-paneth-cells-GE GSM116357.CEL  
 25-paneth-cells GSM116350.CEL  
 24-paneth-cells GSM116359.CEL  
 23-paneth-cells GSM318589.CEL  
 22-paneth-cells GSM318590.CEL  
 21-paneth-cells GSM480375.CEL  
 20-paneth-cells GSM480374.CEL  
 19-Color-Vill GSM480363.CEL  
 18-Color-Vill GSM480362.CEL  
 17-Color-IEC-GE GSM349880.CEL  
 16-Color-IEC-GE GSM350375.CEL  
 15-Intestine-epithelium GSM350376.CEL  
 14-Intestine-epithelium GSM350376.CEL  
 13-Intestine-epithelium RMINEP002901.CEL  
 12-Intestine-epithelium RMINEP001001.CEL  
 11-FAE-RMPYEP002001.CEL  
 10-FAE-RMPYEP001001.CEL  
 09-Ileum-IEC GSM190797.CEL  
 08-Ileum-IEC GSM190796.CEL  
 07-Ileum-IEC GSM190795.CEL  
 06-CT-W-cells GSM190794.CEL  
 05-CT-W-cells GSM190793.CEL  
 04-CT-W-cells GSM190792.CEL  
 03-PP-M-cells GSM190791.CEL  
 02-PP-M-cells GSM190790.CEL  
 01-PP-M-cells GSM190789.CEL



Cluster0222\_House keeping-nucleus (9 nodes)

348  
329.7  
311.4  
293.1  
274.7  
256.4  
238.1  
219.8  
201.5  
183.2  
164.8  
146.5  
128.2  
109.9  
91.6  
73.3  
54.9  
36.6  
18.3  
0

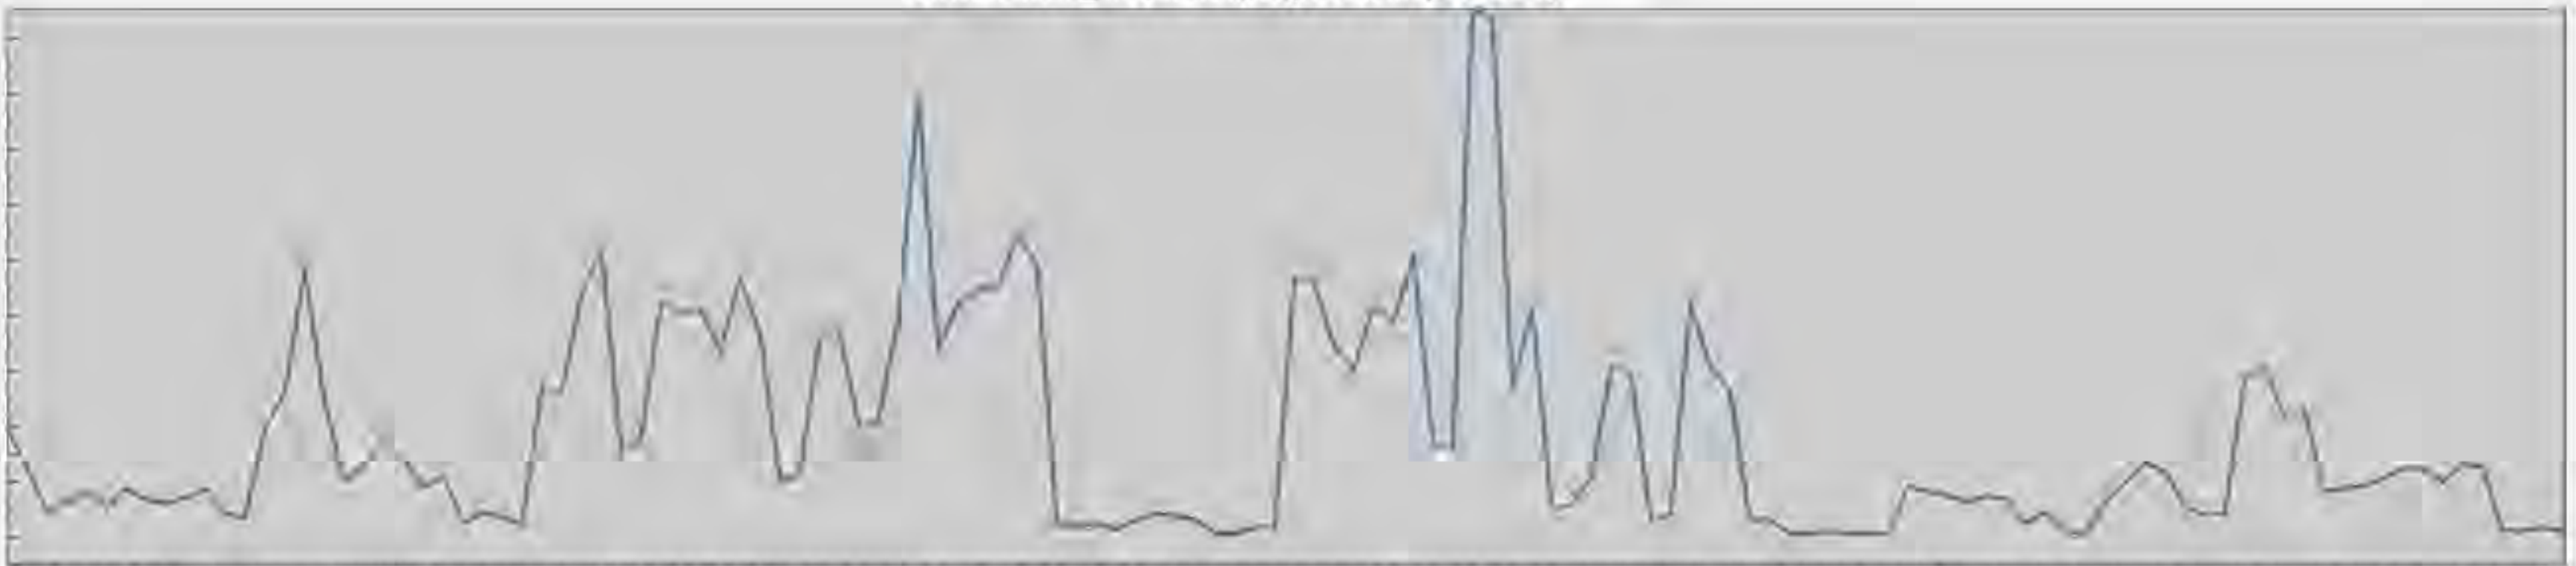

01-PP-M-cells\_GSM190789.CEL  
02-PP-M-cells\_GSM190790.CEL  
03-PP-M-cells\_GSM190791.CEL  
04-CT-v-M-cells\_GSM190792.CEL  
05-CT-v-M-cells\_GSM190793.CEL  
06-CT-w-M-cells\_GSM190794.CEL  
07-Ileum-IEC\_GSM190795.CEL  
08-Ileum-IEC\_GSM190796.CEL  
09-Ileum-IEC\_GSM190797.CEL  
10-FAE-RMPYEP001001.CEL  
11-FAE-RMPYEP002001.CEL  
12-Small-intestine-epithelium\_RMINEP001001.CEL  
13-Small-intestine-epithelium\_RMINEP002001.CEL  
14-Ileum-IEC\_GSM350371.CEL  
15-Ileum-IEC\_GSM350375.CEL  
16-Colon-IEC-GF\_GSM349880.CEL  
17-Colon-VIII\_GSM480362.CEL  
18-Colon-VIII\_GSM480363.CEL  
19-Colon-VIII\_GSM480364.CEL  
20-Colon-Crypt\_GSM480374.CEL  
21-Colon-Crypt\_GSM480375.CEL  
22-Paneth-cells\_GSM318590.CEL  
23-Paneth-cells\_GSM318589.CEL  
24-Paneth-cells\_GSM116359.CEL  
25-Paneth-cells\_GSM116359.CEL  
26-Paneth-cells-GF-1-GSM116357.CEL  
27-Paneth-cells-GF-1-GSM116357.CEL  
28-Paneth-cells-GF-1-GSM116357.CEL  
29-Bone marrow\_GSM258827.CEL  
30-HSC\_GSM258770.CEL  
31-HSC\_GSM258770.CEL  
32-MEP\_GSM258770.CEL  
33-MEP\_GSM258770.CEL  
34-MEP\_GSM258770.CEL  
35-MEP\_GSM258770.CEL  
36-MEP\_GSM258770.CEL  
37-MEP\_GSM258770.CEL  
38-Granulocytes\_GSM258667.CEL  
39-Granulocytes\_GSM258667.CEL  
40-Mast-cells\_GSM258712.CEL  
41-Mast-cells\_GSM258712.CEL  
42-Mast-cells-GF\_GSM258713.CEL  
43-Mast-cells-GF\_GSM258713.CEL  
44-Mast-cells-IgE+Ad\_GSM258718.CEL  
45-Mast-cells-IgE+Ad\_GSM258718.CEL  
46-NK-cells\_GSM258731.CEL  
47-NK-cells\_GSM258731.CEL  
48-CD8a+DC\_GSM258646.CEL  
49-CD8a+DC\_GSM258646.CEL  
50-CD8a-DC\_GSM258647.CEL  
51-CD8a-DC\_GSM258647.CEL  
52-Plasmacytoid-DC\_GSM258650.CEL  
53-Plasmacytoid-DC\_GSM258650.CEL  
54-BMM-GSM258694.CEL  
55-BMM-GSM258694.CEL  
56-BMM-LPS-6h\_GSM258700.CEL  
57-BMM-LPS-6h\_GSM258700.CEL  
58-BMM-LPS-7h\_GSM258702.CEL  
59-BMM-LPS-7h\_GSM258702.CEL  
60-Microglia\_GSM258721.CEL  
61-Microglia\_GSM258721.CEL  
62-Microglia\_GSM258721.CEL  
63-Osteoclasts\_GSM258743.CEL  
64-Osteoclasts\_GSM258743.CEL  
65-Thymocyte-DN\_GSM465595.CEL  
66-Thymocyte-DN\_GSM465595.CEL  
67-T-cells-CD4+\_GSM258773.CEL  
68-T-cells-CD4+\_GSM258773.CEL  
69-T-cells-CD8+\_GSM258774.CEL  
70-T-cells-CD8+\_GSM258774.CEL  
71-Tregs\_GSM258778.CEL  
72-Tregs\_GSM258778.CEL  
73-Tregs\_GSM258778.CEL  
74-BAF3\_GSM258620.CEL  
75-BAF3\_GSM258620.CEL  
76-MZ-Bcell\_GSM258621.CEL  
77-Follicular-Bcells\_GSM258653.CEL  
78-Follicular-Bcells\_GSM258653.CEL  
79-FLY-RMLNDC002001.CEL  
80-FLY-RMLNDC003001.CEL  
81-PP-FDC\_GSM481976.CEL  
82-PP-FDC\_GSM481976.CEL  
83-PP-FDC\_GSM481977.CEL  
84-Lymph-endo-cells\_GSM143704.CEL  
85-MS-1\_GSM234692.CEL  
86-LTcell\_GSM465596.CEL  
87-Nat Helper cell\_GSM465593.CEL  
88-Nat Helper cell\_GSM465593.CEL  
89-Chondrocytes\_GSM266741.CEL  
90-Chondrocytes\_GSM266741.CEL  
91-Osteoblast-d5\_GSM258741.CEL  
92-Osteoblast-d5\_GSM258741.CEL  
93-Osteoblast-d14\_GSM258737.CEL  
94-Osteoblast-d14\_GSM258737.CEL  
95-Osteoblast-d21\_GSM258739.CEL  
96-Osteoblast-d21\_GSM258739.CEL  
97-10T12\_GSM258631.CEL  
98-10T12\_GSM258631.CEL  
99-3T3-L1\_GSM258609.CEL  
100-3T3-L1\_GSM258610.CEL  
101-NH3T3\_GSM258729.CEL  
102-NH3T3\_GSM258729.CEL  
103-C2C12\_GSM258829.CEL  
104-Bruce4\_GSM258866.CEL  
105-Bruce4\_GSM258866.CEL  
106-Bruce4\_GSM258866.CEL  
107-MIMCD3\_GSM258723.CEL  
108-MIMCD3\_GSM258723.CEL  
109-mim6\_GSM258725.CEL  
110-mim6\_GSM258725.CEL  
111-Astrocytes\_GSM241898.CEL  
112-Astrocytes\_GSM241898.CEL  
113-Spleen\_GSM258767.CEL  
114-Spleen\_GSM258767.CEL  
115-Lymph-nodes\_GSM258691.CEL  
116-Lymph-nodes\_GSM258691.CEL  
117-Lymph-nodes\_GSM258691.CEL  
118-Intestine-small\_GSM258692.CEL  
119-Intestine-small\_GSM258692.CEL  
120-Intestine-large\_GSM258678.CEL  
121-Intestine-large\_GSM258678.CEL  
122-Intestine-large\_GSM258676.CEL  
123-Colon-d4\_GSM198810.CEL  
124-Colon-d4\_GSM198810.CEL  
125-Colon-d9\_GSM198810.CEL  
126-Colon-d9\_GSM198810.CEL  
127-NALT\_GSM289408.CEL  
128-NALT\_GSM289409.CEL  
129-NALT\_GSM289410.CEL  
130-NALT\_GSM289411.CEL



Cluster0223\_Uncertain (9 nodes)

863.7  
818.2  
772.8  
727.3  
681.9  
636.4  
590.9  
545.5  
500  
454.6  
409.1  
363.7  
318.2  
272.7  
227.3  
181.8  
136.4  
90.9  
45.5  
0

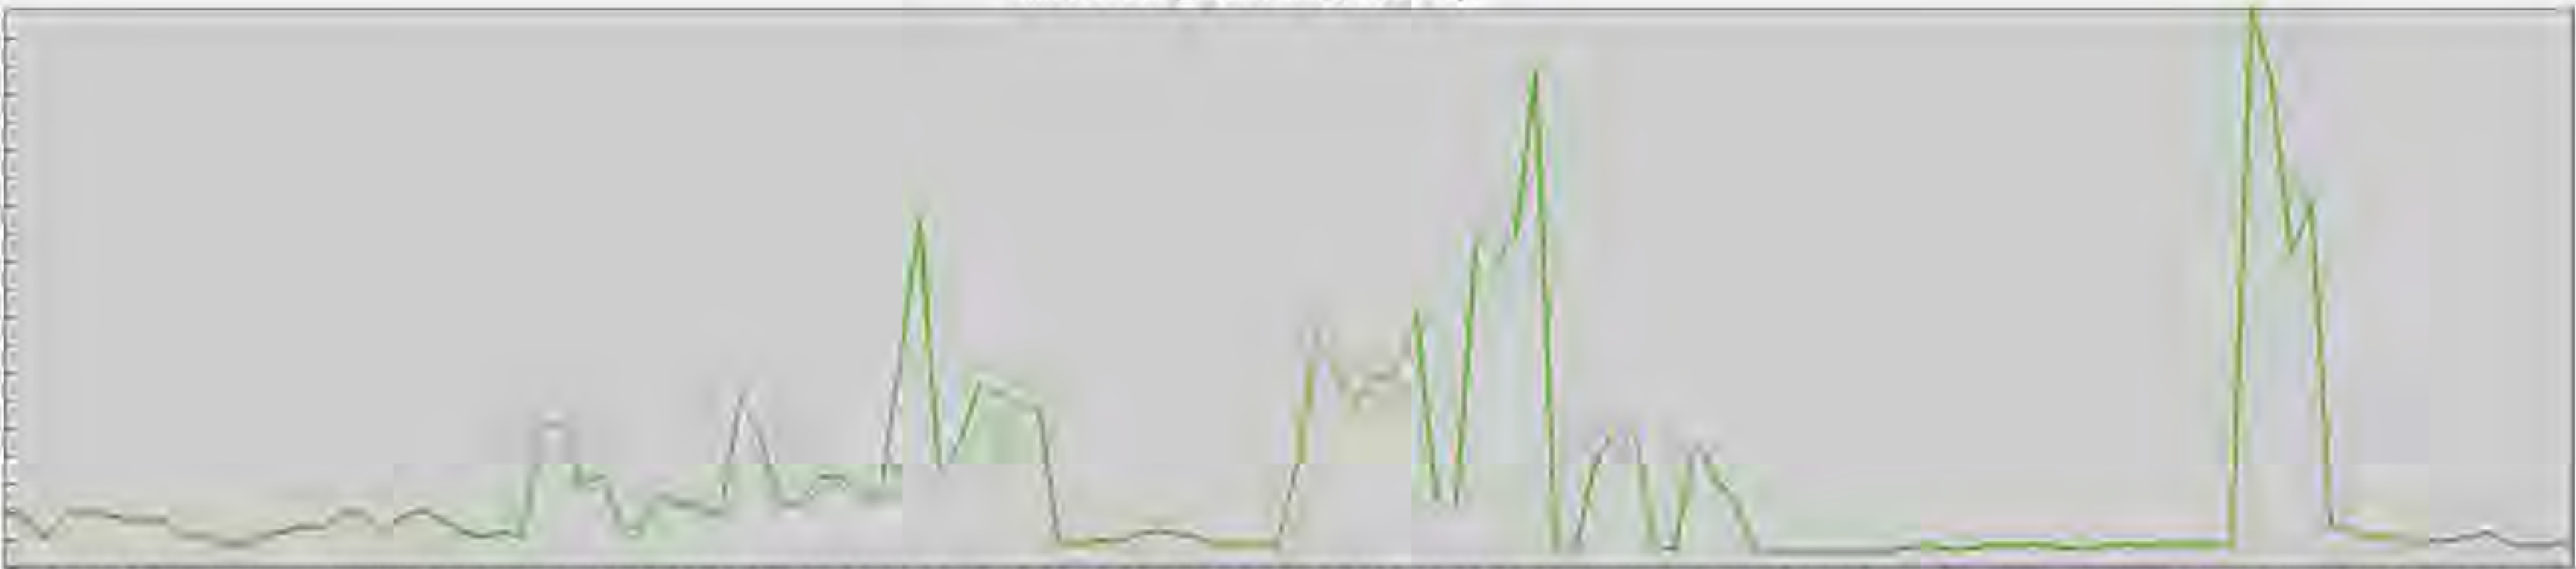

130-NALT GSM289411.CEL  
129-NALT GSM289410.CEL  
128-NALT GSM289409.CEL  
127-NALT GSM289408.CEL  
126-Colon-d9 GSM1988105.CEL  
125-Colon-d9 GSM1988103.CEL  
124-Colon-d9 GSM1988102.CEL  
123-Colon-d4 GSM1988101.CEL  
122-Colon-d4 GSM1988101.CEL  
121-Intestine-large GSM258676.CEL  
120-Intestine-large GSM258678.CEL  
119-Intestine-small GSM258679.CEL  
118-Intestine-small GSM258692.CEL  
117-Lymph-nodes GSM258691.CEL  
116-Lymph-nodes GSM258726.CEL  
115-Spleen GSM258768.CEL  
114-Spleen GSM258767.CEL  
113-Neuro2a GSM258728.CEL  
112-Neuro2a GSM258727.CEL  
111-Astrocytes GSM241898.CEL  
110-mim6 GSM258726.CEL  
109-mim6 GSM258725.CEL  
108-MIMCD3 GSM258724.CEL  
107-MIMCD3 GSM258723.CEL  
106-Bruce4 GSM258656.CEL  
105-Bruce4 GSM258656.CEL  
104-C2C12 GSM258690.CEL  
103-C2C12 GSM258629.CEL  
102-NH3T3 GSM258739.CEL  
101-NH3T3 GSM258739.CEL  
100-3T3-L1 GSM258610.CEL  
99-3T3-L1 GSM258609.CEL  
98-10T12 GSM258631.CEL  
97-10T12 GSM258631.CEL  
96-Osteoblast-d21 GSM258740.CEL  
95-Osteoblast-d21 GSM258739.CEL  
94-Osteoblast-d14 GSM258738.CEL  
93-Osteoblast-d14 GSM258737.CEL  
92-Osteoblast-d5 GSM258742.CEL  
91-Osteoblast-d5 GSM258741.CEL  
90-Chondrocytes GSM266741.CEL  
89-Chondrocytes GSM266740.CEL  
88-Nat Helper cell GSM465594.CEL  
87-Nat Helper cell GSM465593.CEL  
86-LT cell GSM465596.CEL  
85-MS-1 GSM234692.CEL  
84-Lymph-endo-cells GSM143704.CEL  
83-PP-FDC GSM481977.CEL  
82-PP-FDC GSM481978.CEL  
81-PP-FDC GSM481976.CEL  
80-F-LY RMLNDCC003001.CEL  
79-F-LY RMLNDCC003001.CEL  
78-Follicular-Bcells GSM258664.CEL  
77-Follicular-Bcells GSM258663.CEL  
76-MZ-Bcell GSM258622.CEL  
75-MZ-Bcell GSM258621.CEL  
74-BAF3 GSM258620.CEL  
73-BAF3 GSM258619.CEL  
72-Tregs GSM258778.CEL  
71-Tregs GSM258777.CEL  
70-T-cells-CD8+ GSM258776.CEL  
69-T-cells-CD8+ GSM258774.CEL  
68-T-cells-CD4+ GSM258773.CEL  
67-T-cells-CD4+ GSM258773.CEL  
66-Thymocyte-DN GSM465595.CEL  
65-Osteoclasts GSM258743.CEL  
64-Osteoclasts GSM258743.CEL  
63-Microglia GSM258721.CEL  
62-Microglia GSM258721.CEL  
61-PM-M-LPS-7h GSM258706.CEL  
60-PM-M-LPS-7h GSM258706.CEL  
59-PM-M-LPS-6h GSM258702.CEL  
58-PM-M-LPS-6h GSM258702.CEL  
57-BMM-LPS-6h GSM258699.CEL  
56-BMM-LPS-6h GSM258699.CEL  
55-BMM-LPS-6h GSM258699.CEL  
54-BMM-LPS-6h GSM258699.CEL  
53-Iasmacryoid-DC GSM258650.CEL  
52-Iasmacryoid-DC GSM258649.CEL  
51-CD8a-DC GSM258648.CEL  
50-CD8a-DC GSM258647.CEL  
49-CD8a+DC GSM258646.CEL  
48-CD8a+DC GSM258646.CEL  
47-NK-cells GSM258732.CEL  
46-NK-cells GSM258732.CEL  
45-Mast-cells-IgE+Ad GSM258718.CEL  
44-Mast-cells-IgE+Ad GSM258717.CEL  
43-Mast-cells-IgE GSM258714.CEL  
42-Mast-cells-IgE GSM258713.CEL  
41-Mast-cells GSM258712.CEL  
40-Granulocytes GSM258668.CEL  
39-Granulocytes GSM258667.CEL  
38-GMP GSM258666.CEL  
37-GMP GSM258666.CEL  
36-GMP GSM258666.CEL  
35-CMP GSM258642.CEL  
34-CMP GSM258642.CEL  
33-MEP GSM258720.CEL  
32-MEP GSM258719.CEL  
31-HESC GSM258770.CEL  
30-HESC GSM258769.CEL  
29-Bone marrow GSM258628.CEL  
28-Bone marrow GSM258627.CEL  
27-Paneth-cells-GF-1 GSM116357.CEL  
26-Paneth-cells-GF-1 GSM116357.CEL  
25-Paneth-cells GSM116350.CEL  
24-Paneth-cells GSM116359.CEL  
23-Paneth-cells GSM318589.CEL  
22-Paneth-cells GSM318589.CEL  
21-Colon-Crypt GSM480375.CEL  
20-Colon-Crypt GSM480374.CEL  
19-Colon-Vill GSM480363.CEL  
18-Colon-Vill GSM480362.CEL  
17-Colon-IEC-GF GSM349880.CEL  
16-Colon-IEC-GF GSM350375.CEL  
15-Ileum-IEC-GF GSM350376.CEL  
14-Ileum-IEC GSM350371.CEL  
13-Small-intestine-epithelium RMINEP002001.CEL  
12-Small-intestine-epithelium RMINEP001001.CEL  
11-FAE RMPYEP002001.CEL  
10-FAE RMPYEP001001.CEL  
09-Ileum-IEC GSM190797.CEL  
08-Ileum-IEC GSM190796.CEL  
07-Ileum-IEC GSM190795.CEL  
06-CT-w-M-cells GSM190794.CEL  
05-CT-w-M-cells GSM190793.CEL  
04-CT-v-M-cells GSM190792.CEL  
03-PP-M-cells GSM190791.CEL  
02-PP-M-cells GSM190790.CEL  
01-PP-M-cells GSM190789.CEL



Cluster0224\_House keeping-transcription (9 nodes)

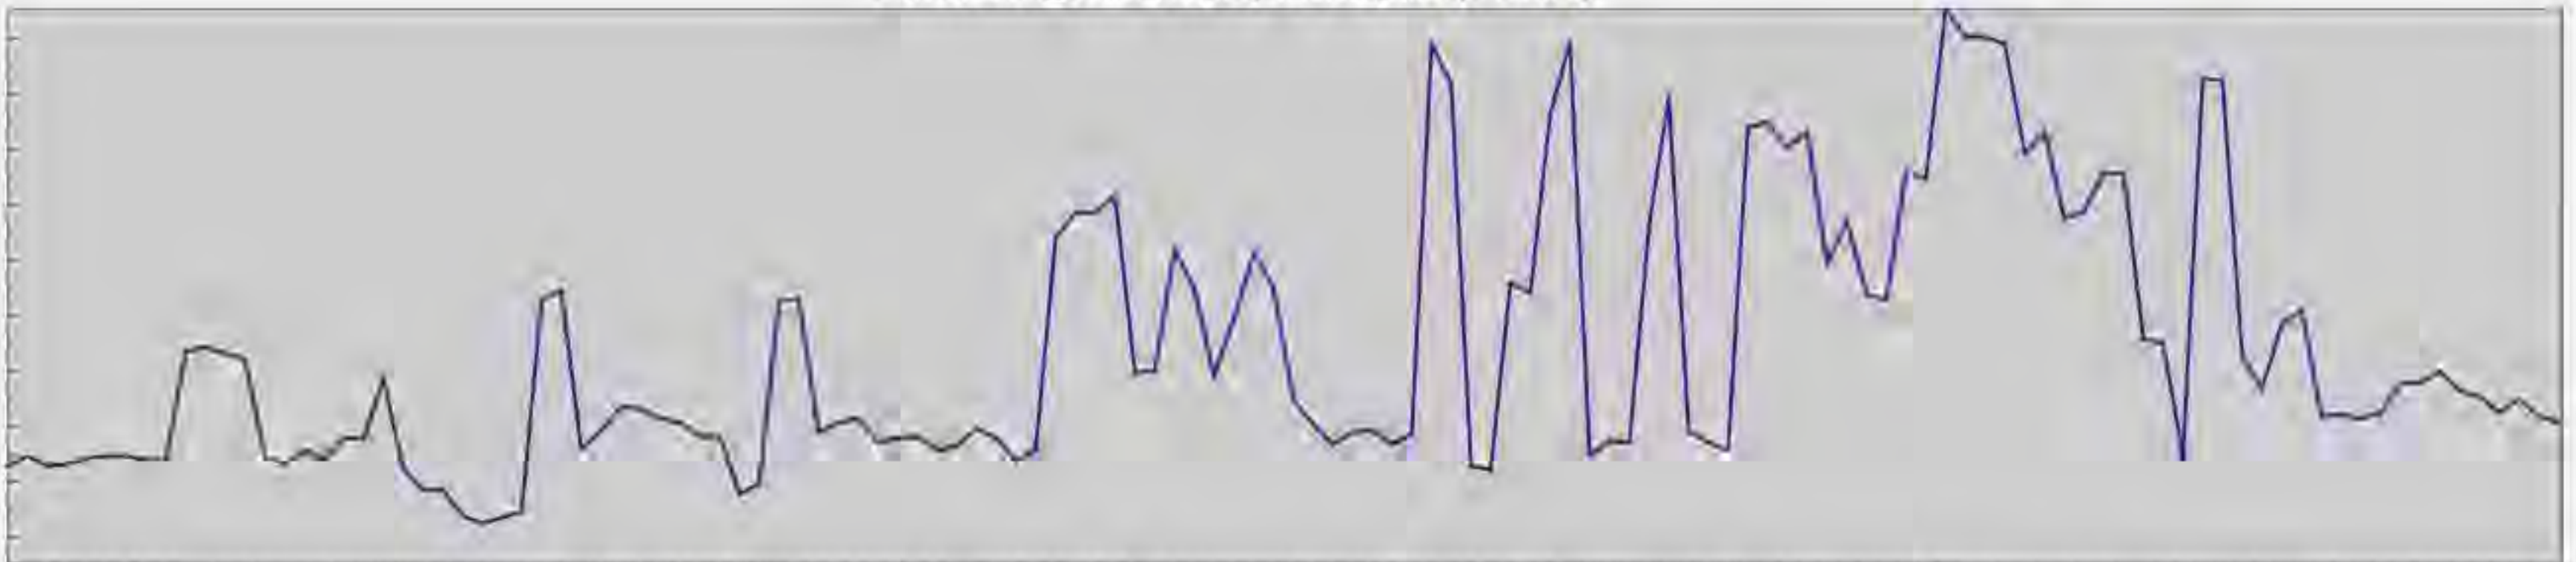

01-PP-M-cells\_GSM190789.CEL  
 02-PP-M-cells\_GSM190790.CEL  
 03-PP-M-cells\_GSM190791.CEL  
 04-CT-v-M-cells\_GSM190792.CEL  
 05-CT-v-M-cells\_GSM190793.CEL  
 06-CT-v-M-cells\_GSM190794.CEL  
 07-Ileum-IEC\_GSM190795.CEL  
 08-Ileum-IEC\_GSM190796.CEL  
 09-Ileum-RMPYEP001001.CEL  
 10-FAE-RMPYEP001001.CEL  
 11-FAE-RMPYEP002001.CEL  
 12-SmallIntestine-epithelium\_RMINEP001001.CEL  
 13-SmallIntestine-epithelium\_RMINEP002001.CEL  
 14-Ileum-IEC\_GSM350371.CEL  
 15-Ileum-IEC\_GSM350375.CEL  
 16-Colon-IEC-Gf\_GSM349880.CEL  
 17-Colon-VIII\_GSM480362.CEL  
 18-Colon-VIII\_GSM480363.CEL  
 19-Colon-VIII\_GSM480364.CEL  
 20-Colon-Crypt\_GSM480374.CEL  
 21-Colon-Crypt\_GSM480375.CEL  
 22-Paneth-cells\_GSM318589.CEL  
 23-Paneth-cells\_GSM318590.CEL  
 24-Paneth-cells\_GSM116359.CEL  
 25-Paneth-cells\_GSM116359.CEL  
 26-Paneth-cells-Gf-1\_GSM116357.CEL  
 27-Paneth-cells-Gf-1\_GSM116357.CEL  
 28-Bone marrow\_GSM258627.CEL  
 29-Bone marrow\_GSM258627.CEL  
 30-HSC\_GSM258770.CEL  
 31-HSC\_GSM258770.CEL  
 32-MEP\_GSM258770.CEL  
 33-MEP\_GSM258770.CEL  
 34-MEP\_GSM258770.CEL  
 35-MEP\_GSM258770.CEL  
 36-MEP\_GSM258770.CEL  
 37-MEP\_GSM258770.CEL  
 38-Granulocytes\_GSM258667.CEL  
 39-Granulocytes\_GSM258667.CEL  
 40-Mast-cells\_GSM258712.CEL  
 41-Mast-cells\_GSM258712.CEL  
 42-Mast-cells-Gf\_GSM258713.CEL  
 43-Mast-cells-Gf\_GSM258713.CEL  
 44-Mast-cells-IgE+Ad\_GSM258718.CEL  
 45-Mast-cells-IgE+Ad\_GSM258718.CEL  
 46-NK-cells\_GSM258731.CEL  
 47-NK-cells\_GSM258731.CEL  
 48-CD8a+DC\_GSM258645.CEL  
 49-CD8a+DC\_GSM258645.CEL  
 50-CD8a-DC\_GSM258647.CEL  
 51-CD8a-DC\_GSM258647.CEL  
 52-Plasmacytoid-DC\_GSM258649.CEL  
 53-Plasmacytoid-DC\_GSM258649.CEL  
 54-BMM-GSM258694.CEL  
 55-BMM-GSM258694.CEL  
 56-BMM-LPS-6h\_GSM258699.CEL  
 57-BMM-LPS-6h\_GSM258699.CEL  
 58-BMM-LPS-7h\_GSM258702.CEL  
 59-BMM-LPS-7h\_GSM258702.CEL  
 60-PM-M-LPS-7h\_GSM258706.CEL  
 61-PM-M-LPS-7h\_GSM258706.CEL  
 62-Microglia\_GSM258721.CEL  
 63-Microglia\_GSM258721.CEL  
 64-Osteoclasts\_GSM258743.CEL  
 65-Osteoclasts\_GSM258743.CEL  
 66-Thymocyte-DN\_GSM465595.CEL  
 67-T-cells-CD4+\_GSM258773.CEL  
 68-T-cells-CD4+\_GSM258773.CEL  
 69-T-cells-CD8+\_GSM258774.CEL  
 70-T-cells-CD8+\_GSM258774.CEL  
 71-Tregs\_GSM258778.CEL  
 72-Tregs\_GSM258778.CEL  
 73-BAF3\_GSM258819.CEL  
 74-BAF3\_GSM258820.CEL  
 75-MZ-Bcell\_GSM258821.CEL  
 76-MZ-Bcell\_GSM258821.CEL  
 77-Follicular-Bcells\_GSM258864.CEL  
 78-Follicular-Bcells\_GSM258864.CEL  
 79-FLY-RMLNDC002001.CEL  
 80-FLY-RMLNDC003001.CEL  
 81-PP-FDC\_GSM481976.CEL  
 82-PP-FDC\_GSM481976.CEL  
 83-PP-FDC\_GSM481977.CEL  
 84-Lymph-endo-cells\_GSM143704.CEL  
 85-MS-1\_GSM234692.CEL  
 86-LTcell\_GSM465596.CEL  
 87-NatHelpercell\_GSM465593.CEL  
 88-NatHelpercell\_GSM465593.CEL  
 89-Chondrocytes\_GSM266740.CEL  
 90-Chondrocytes\_GSM266741.CEL  
 91-Osteoblast-d5\_GSM258742.CEL  
 92-Osteoblast-d5\_GSM258742.CEL  
 93-Osteoblast-d14\_GSM258737.CEL  
 94-Osteoblast-d14\_GSM258738.CEL  
 95-Osteoblast-d21\_GSM258739.CEL  
 96-Osteoblast-d21\_GSM258739.CEL  
 97-10T12\_GSM258631.CEL  
 98-10T12\_GSM258631.CEL  
 99-3T3-L1\_GSM258609.CEL  
 100-3T3-L1\_GSM258610.CEL  
 101-NH3T3\_GSM258739.CEL  
 102-NH3T3\_GSM258739.CEL  
 103-C2C12\_GSM258829.CEL  
 104-C2C12\_GSM258829.CEL  
 105-Bruce4\_GSM258866.CEL  
 106-Bruce4\_GSM258866.CEL  
 107-MIMCD3\_GSM258723.CEL  
 108-MIMCD3\_GSM258723.CEL  
 109-mim6\_GSM258725.CEL  
 110-mim6\_GSM258725.CEL  
 111-Astrocytes\_GSM241898.CEL  
 112-Astrocytes\_GSM241898.CEL  
 113-Spleen\_GSM258767.CEL  
 114-Spleen\_GSM258767.CEL  
 115-Spleen\_GSM258768.CEL  
 116-Lymph-nodes\_GSM258691.CEL  
 117-Lymph-nodes\_GSM258691.CEL  
 118-Intestine-small\_GSM258677.CEL  
 119-Intestine-small\_GSM258677.CEL  
 120-Intestine-large\_GSM258678.CEL  
 121-Intestine-large\_GSM258678.CEL  
 122-Colon-d4\_GSM198101.CEL  
 123-Colon-d4\_GSM198101.CEL  
 124-Colon-d9\_GSM198103.CEL  
 125-Colon-d9\_GSM198103.CEL  
 126-Colon-d9\_GSM198104.CEL  
 127-NALT\_GSM289408.CEL  
 128-NALT\_GSM289409.CEL  
 129-NALT\_GSM289410.CEL  
 130-NALT\_GSM289411.CEL



Cluster0225\_Uncertain (9 nodes)

1,253.1  
1,187.2  
1,121.2  
1,055.2  
989.3  
923.3  
857.4  
791.4  
725.5  
659.5  
593.6  
527.6  
461.7  
395.7  
329.8  
263.8  
197.9  
131.9  
66  
0

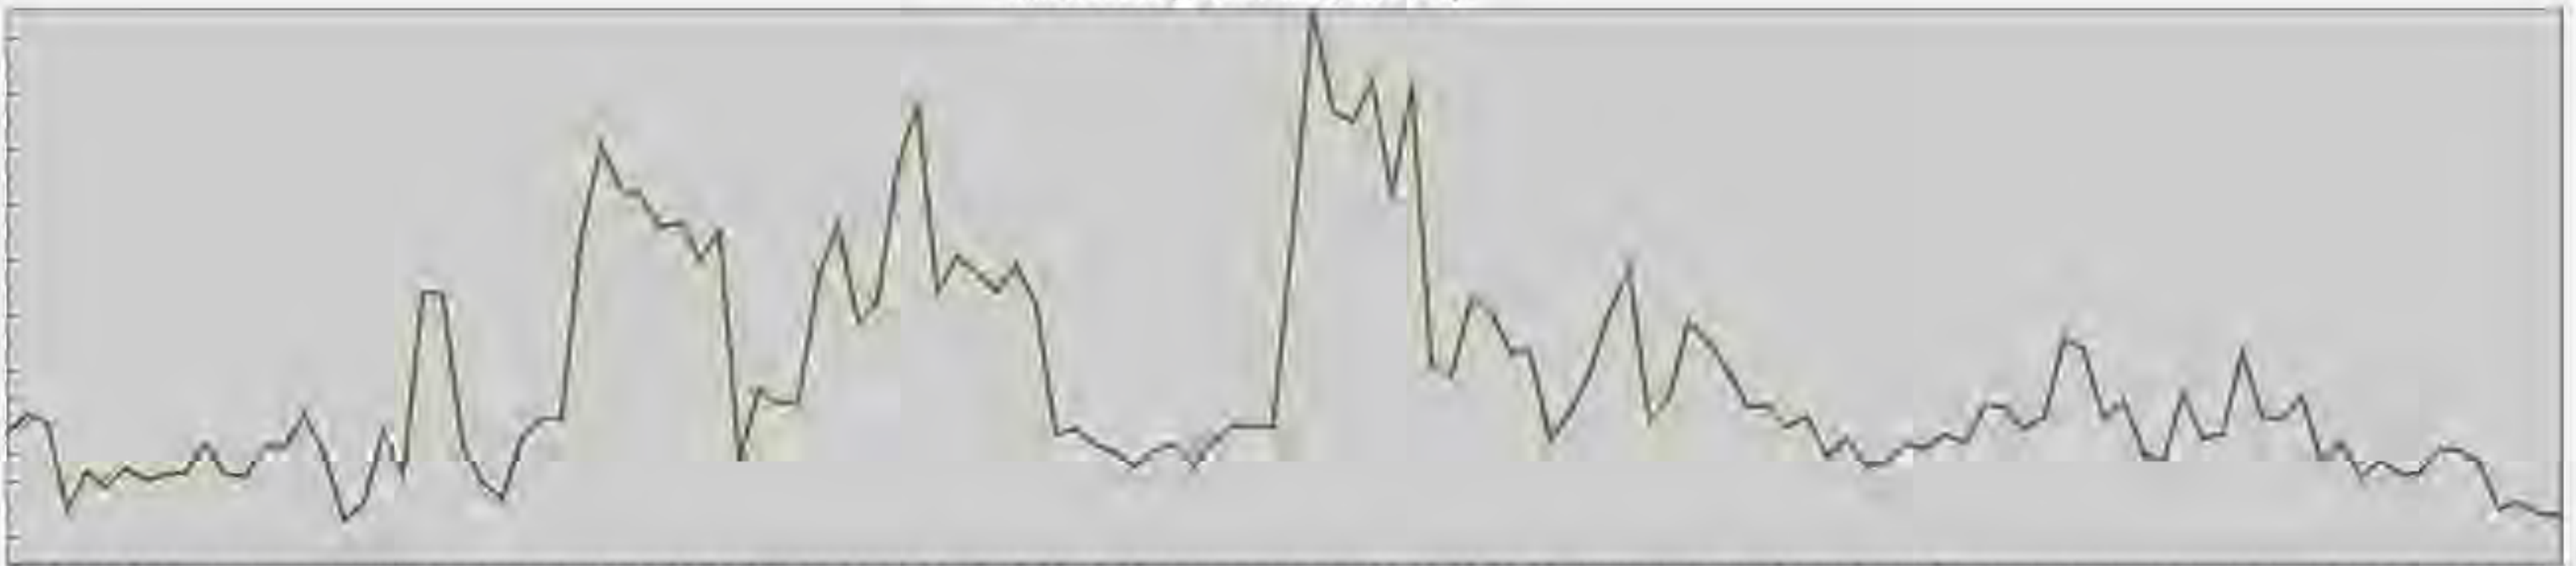

130-NALT GSM289411.CEL  
 129-NALT GSM289410.CEL  
 128-NALT GSM289409.CEL  
 127-NALT GSM289408.CEL  
 126-CD9 GSM1988105.CEL  
 125-CD9 GSM1988104.CEL  
 124-CD9 GSM1988103.CEL  
 123-CD9 GSM1988102.CEL  
 122-CD9 GSM1988101.CEL  
 121-Intestine-large GSM258676.CEL  
 120-Intestine-large GSM258675.CEL  
 119-Intestine-small GSM258674.CEL  
 118-Intestine-small GSM258673.CEL  
 117-Lymph-nodes GSM258672.CEL  
 116-Lymph-nodes GSM258671.CEL  
 115-Spleen GSM258767.CEL  
 114-Spleen GSM258766.CEL  
 113-Neuro2a GSM258728.CEL  
 112-Neuro2a GSM258727.CEL  
 111-Astrocytes GSM241898.CEL  
 110-mim6 GSM258726.CEL  
 109-mim6 GSM258725.CEL  
 108-MIMCD3 GSM258724.CEL  
 107-MIMCD3 GSM258723.CEL  
 106-Bruce4 GSM258665.CEL  
 105-Bruce4 GSM258664.CEL  
 104-C2C12 GSM258690.CEL  
 103-C2C12 GSM258689.CEL  
 102-NH3T3 GSM258739.CEL  
 101-NH3T3 GSM258738.CEL  
 100-3T3-L1 GSM258610.CEL  
 99-3T3-L1 GSM258609.CEL  
 98-10T12 GSM258632.CEL  
 97-10T12 GSM258631.CEL  
 96-Osteoblast-d21 GSM258740.CEL  
 95-Osteoblast-d21 GSM258739.CEL  
 94-Osteoblast-d14 GSM258738.CEL  
 93-Osteoblast-d14 GSM258737.CEL  
 92-Osteoblast-d5 GSM258742.CEL  
 91-Osteoblast-d5 GSM258741.CEL  
 90-Chondrocytes GSM266741.CEL  
 89-Chondrocytes GSM266740.CEL  
 88-Nat Helper cell GSM465594.CEL  
 87-Nat Helper cell GSM465593.CEL  
 86-TT cell GSM465596.CEL  
 85-MS-1 GSM234692.CEL  
 84-Lymph-endo-cells GSM143704.CEL  
 83-PP-FDC GSM481977.CEL  
 82-PP-FDC GSM481978.CEL  
 81-PP-FDC GSM481976.CEL  
 80-LY-RMLNDCC003001.CEL  
 79-LY-RMLNDCC003001.CEL  
 78-Follicular-Bcells GSM258664.CEL  
 77-Follicular-Bcells GSM258663.CEL  
 76-MZ-Bcell GSM258622.CEL  
 75-MZ-Bcell GSM258621.CEL  
 74-BAF3 GSM258620.CEL  
 73-BAF3 GSM258619.CEL  
 72-Tregs GSM258778.CEL  
 71-Tregs GSM258777.CEL  
 70-T-cells-CD8+ GSM258776.CEL  
 69-T-cells-CD8+ GSM258774.CEL  
 68-T-cells-CD4+ GSM258773.CEL  
 67-T-cells-CD4+ GSM258744.CEL  
 66-Thymocyte-DN GSM465595.CEL  
 65-Osteoclasts GSM258743.CEL  
 64-Microglia GSM258721.CEL  
 63-Microglia GSM258721.CEL  
 62-MM-LPS-7h GSM268706.CEL  
 61-MM-LPS-7h GSM268705.CEL  
 60-MM-LPS-6h GSM258702.CEL  
 59-MM-LPS-6h GSM258701.CEL  
 58-MM-LPS-6h GSM258699.CEL  
 57-MM-LPS-6h GSM258699.CEL  
 56-MM-LPS-6h GSM258694.CEL  
 55-MM-LPS-6h GSM258694.CEL  
 54-MM-LPS-6h GSM258694.CEL  
 53-Plasmacytoid-DC GSM258650.CEL  
 52-CD8a-DC GSM258649.CEL  
 51-CD8a-DC GSM258647.CEL  
 50-CD8a-DC GSM258647.CEL  
 49-CD8a+DC GSM258646.CEL  
 48-CD8a+DC GSM258645.CEL  
 47-NK-cells GSM258732.CEL  
 46-NK-cells GSM258731.CEL  
 45-Mast-cells-IgE+Ad GSM258719.CEL  
 44-Mast-cells-IgE+Ad GSM258717.CEL  
 43-Mast-cells-IgE GSM258714.CEL  
 42-Mast-cells-IgE GSM258713.CEL  
 41-Mast-cells GSM258712.CEL  
 40-Granulocytes GSM258668.CEL  
 39-Granulocytes GSM258667.CEL  
 38-GMP GSM258666.CEL  
 37-GMP GSM258665.CEL  
 36-GMP GSM258665.CEL  
 35-GMP GSM258642.CEL  
 34-GMP GSM258642.CEL  
 33-MEP GSM258720.CEL  
 32-MEP GSM258719.CEL  
 31-HESC GSM258770.CEL  
 30-HESC GSM258769.CEL  
 29-Bone marrow GSM258628.CEL  
 28-Bone marrow GSM258627.CEL  
 27-paneth-cells-GF GSM116357.CEL  
 26-paneth-cells-GF GSM116350.CEL  
 25-paneth-cells GSM116359.CEL  
 24-paneth-cells GSM116359.CEL  
 23-paneth-cells GSM318589.CEL  
 22-paneth-cells GSM318590.CEL  
 21-paneth-cells GSM480375.CEL  
 20-Colon-Crypt GSM480374.CEL  
 19-Colon-Vill GSM480363.CEL  
 18-Colon-Vill GSM480362.CEL  
 17-Colon-IEC-GF GSM349880.CEL  
 16-Colon-IEC-GF GSM350375.CEL  
 15-Ileum-IEC-GF GSM350376.CEL  
 14-Ileum-IEC GSM350371.CEL  
 13-Small-intestine-epithelium RMINEP002001.CEL  
 12-Small-intestine-epithelium RMINEP001001.CEL  
 11-FAE-RMPYEP002001.CEL  
 10-FAE-RMPYEP001001.CEL  
 09-Ileum-IEC GSM190797.CEL  
 08-Ileum-IEC GSM190796.CEL  
 07-Ileum-IEC GSM190795.CEL  
 06-CT-v-M-cells GSM190794.CEL  
 05-CT-v-M-cells GSM190793.CEL  
 04-CT-v-M-cells GSM190792.CEL  
 03-PP-M-cells GSM190791.CEL  
 02-PP-M-cells GSM190790.CEL  
 01-PP-M-cells GSM190789.CEL



Cluster0226\_House keeping (9 nodes)

4,137.1  
3,919.4  
3,701.6  
3,483.9  
3,266.2  
3,048.4  
2,830.7  
2,612.9  
2,395.2  
2,177.4  
1,959.7  
1,742  
1,524.2  
1,306.5  
1,088.7  
871  
653.2  
435.5  
217.7  
0

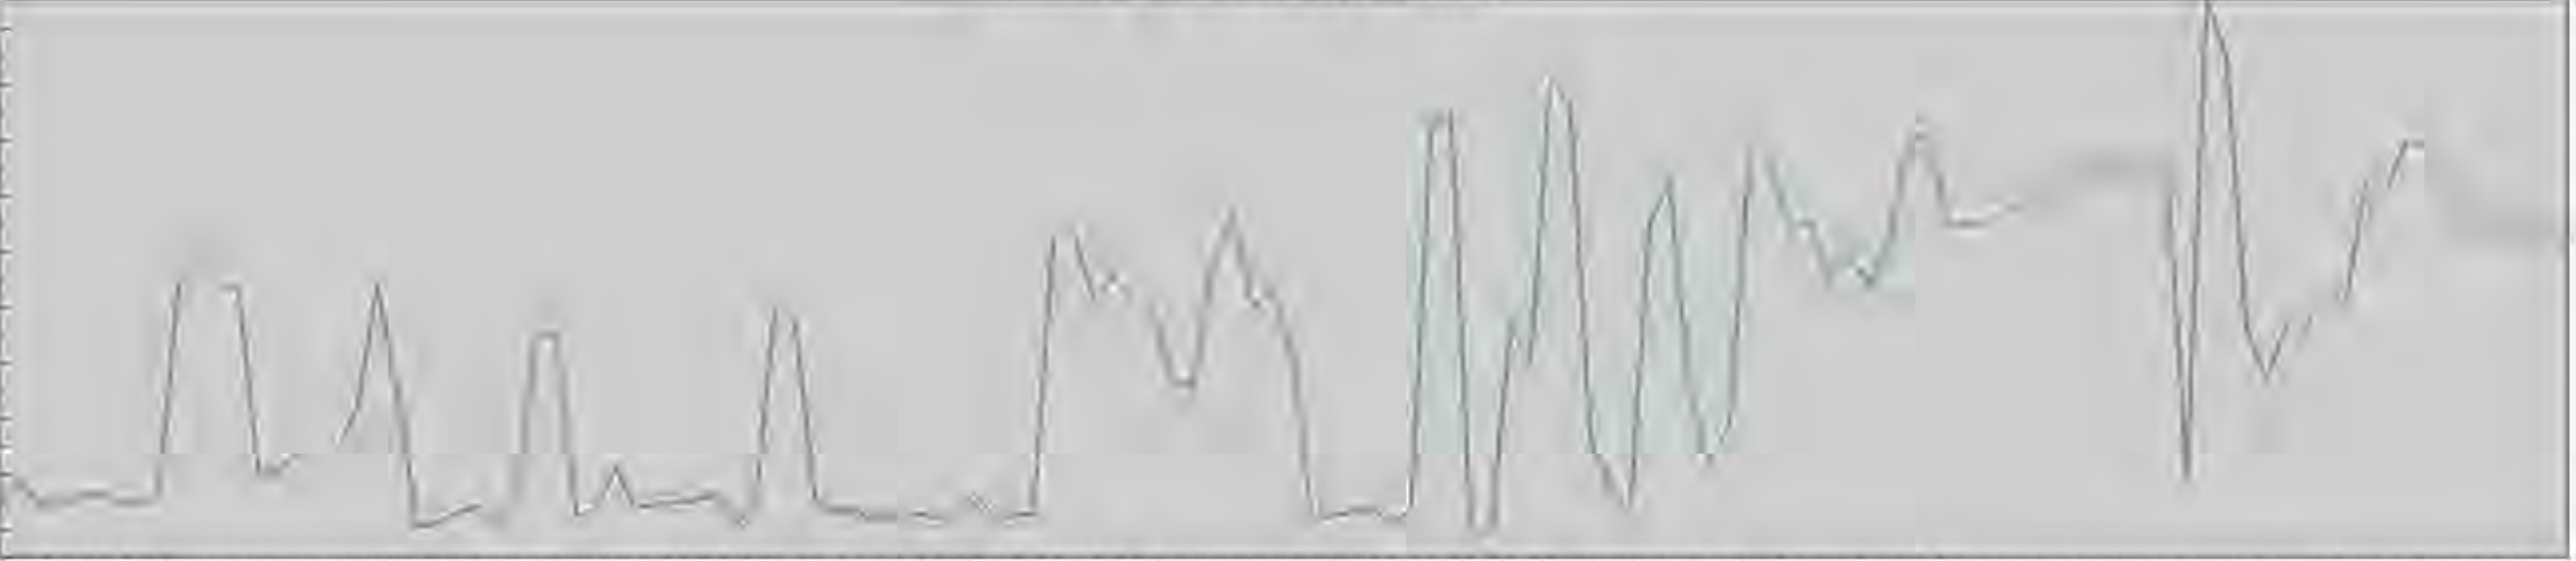

130-NALT GSM289411 CELL  
129-NALT GSM289410 CELL  
128-NALT GSM289409 CELL  
127-NALT GSM289408 CELL  
126-CD8A GSM1988105 CELL  
125-CD8A GSM1988104 CELL  
124-CD8A GSM1988103 CELL  
123-CD8A GSM1988102 CELL  
122-CD8A GSM1988101 CELL  
121-Intestine-large GSM258676 CELL  
120-Intestine-large GSM258675 CELL  
119-Intestine-small GSM258674 CELL  
118-Intestine-small GSM258673 CELL  
117-Lymph-nodes GSM258672 CELL  
116-Lymph-nodes GSM258671 CELL  
115-Spleen GSM258670 CELL  
114-Spleen GSM258669 CELL  
113-Neuro2a GSM241898 CELL  
112-Astrocytes GSM241897 CELL  
111-ming GSM258726 CELL  
110-ming GSM258725 CELL  
109-mim6 GSM258724 CELL  
108-MIMCD3 GSM258723 CELL  
107-MIMCD3 GSM258722 CELL  
106-Bruce4 GSM258665 CELL  
105-Bruce4 GSM258664 CELL  
104-C2C12 GSM258663 CELL  
103-C2C12 GSM258662 CELL  
102-NH3T3 GSM258739 CELL  
101-NH3T3 GSM258738 CELL  
100-3T3-L1 GSM258610 CELL  
99-3T3-L1 GSM258609 CELL  
98-10T12 GSM258632 CELL  
97-10T12 GSM258631 CELL  
96-Osteoblast-d21 GSM258740 CELL  
95-Osteoblast-d21 GSM258739 CELL  
94-Osteoblast-d14 GSM258738 CELL  
93-Osteoblast-d14 GSM258737 CELL  
92-Osteoblast-d5 GSM258742 CELL  
91-Osteoblast-d5 GSM258741 CELL  
90-Chondrocytes GSM266741 CELL  
89-Chondrocytes GSM266740 CELL  
88-Nat Helper cell GSM465594 CELL  
87-Nat Helper cell GSM465593 CELL  
86-LT cell GSM465596 CELL  
85-M8-1 GSM234692 CELL  
84-Lymph-endo-cells GSM143704 CELL  
83-P-FDC GSM481977 CELL  
82-P-FDC GSM481978 CELL  
81-P-FDC GSM481976 CELL  
80-L Y RMLNDCC003001 CELL  
79-L Y RMLNDCC003001 CELL  
78-Follicular-B-cells GSM258664 CELL  
77-Follicular-B-cells GSM258663 CELL  
76-MZ-Bcell GSM258627 CELL  
75-MZ-Bcell GSM258627 CELL  
74-BAF3 GSM258620 CELL  
73-BAF3 GSM258619 CELL  
72-Tregs GSM258778 CELL  
71-Tregs GSM258777 CELL  
70-T-cells-CD8+ GSM258776 CELL  
69-T-cells-CD8+ GSM258774 CELL  
68-T-cells-CD4+ GSM258773 CELL  
67-T-cells-CD4+ GSM258744 CELL  
66-Thymocyte-DN GSM465595 CELL  
65-Osteoclasts GSM258743 CELL  
64-Osteoclasts GSM258743 CELL  
63-Microglia GSM258727 CELL  
62-Microglia GSM258727 CELL  
61-PM-M-PS-7h GSM258706 CELL  
60-PM-M-PS-7h GSM258705 CELL  
59-PM-M-PS-7h GSM258702 CELL  
58-PM-M-PS-6h GSM258701 CELL  
57-PM-M-PS-6h GSM258699 CELL  
56-PM-M-PS-6h GSM258699 CELL  
55-PM-M-PS-6h GSM258699 CELL  
54-PM-M-PS-6h GSM258699 CELL  
53-PM-M-PS-6h GSM258699 CELL  
52-PM-M-PS-6h GSM258699 CELL  
51-PM-M-PS-6h GSM258699 CELL  
50-CD8a-DC GSM258647 CELL  
49-CD8a-DC GSM258646 CELL  
48-CD8a+DC GSM258646 CELL  
47-NK-cells GSM258737 CELL  
46-NK-cells GSM258737 CELL  
45-Mast-cells-IgE+Ad GSM258719 CELL  
44-Mast-cells-IgE+Ad GSM258717 CELL  
43-Mast-cells-IgE GSM258714 CELL  
42-Mast-cells-IgE GSM258713 CELL  
41-Mast-cells GSM258712 CELL  
40-Granulocytes GSM258711 CELL  
39-Granulocytes GSM258668 CELL  
38-Granulocytes GSM258667 CELL  
37-GMP GSM258666 CELL  
36-GMP GSM258666 CELL  
35-GMP GSM258664 CELL  
34-GMP GSM258664 CELL  
33-MEP GSM258720 CELL  
32-MEP GSM258719 CELL  
31-HESC GSM258770 CELL  
30-HESC GSM258769 CELL  
29-Bone marrow GSM258628 CELL  
28-Bone marrow GSM258627 CELL  
27-paneth-cells-GE GSM116358 CELL  
26-paneth-cells-GE GSM116357 CELL  
25-paneth-cells GSM116350 CELL  
24-paneth-cells GSM116359 CELL  
23-paneth-cells GSM318589 CELL  
22-paneth-cells GSM318590 CELL  
21-paneth-cells GSM480375 CELL  
20-CD8a-DC GSM480374 CELL  
19-CD8a-DC GSM480363 CELL  
18-CD8a-DC GSM480362 CELL  
17-CD8a-DC GSM349880 CELL  
16-CD8a-DC GSM350375 CELL  
15-CD8a-DC GSM350376 CELL  
14-Intestine-epithelium RMINEP002901 CELL  
13-Intestine-epithelium RMINEP001001 CELL  
12-Intestine-epithelium RMINEP001001 CELL  
11-FAE RMPYEP002001 CELL  
10-FAE RMPYEP001001 CELL  
09-Ileum-IEC GSM190797 CELL  
08-Ileum-IEC GSM190796 CELL  
07-Ileum-IEC GSM190795 CELL  
06-CT-v-M-cells GSM190794 CELL  
05-CT-v-M-cells GSM190793 CELL  
04-PP-M-cells GSM190792 CELL  
03-PP-M-cells GSM190791 CELL  
02-PP-M-cells GSM190790 CELL  
01-PP-M-cells GSM190789 CELL



Cluster0227\_Uncertain-low in many (9 nodes)

101.6  
96.3  
90.9  
85.6  
80.2  
74.9  
69.5  
64.2  
58.8  
53.5  
48.1  
42.8  
37.4  
32.1  
26.7  
21.4  
16  
10.7  
5.3  
0

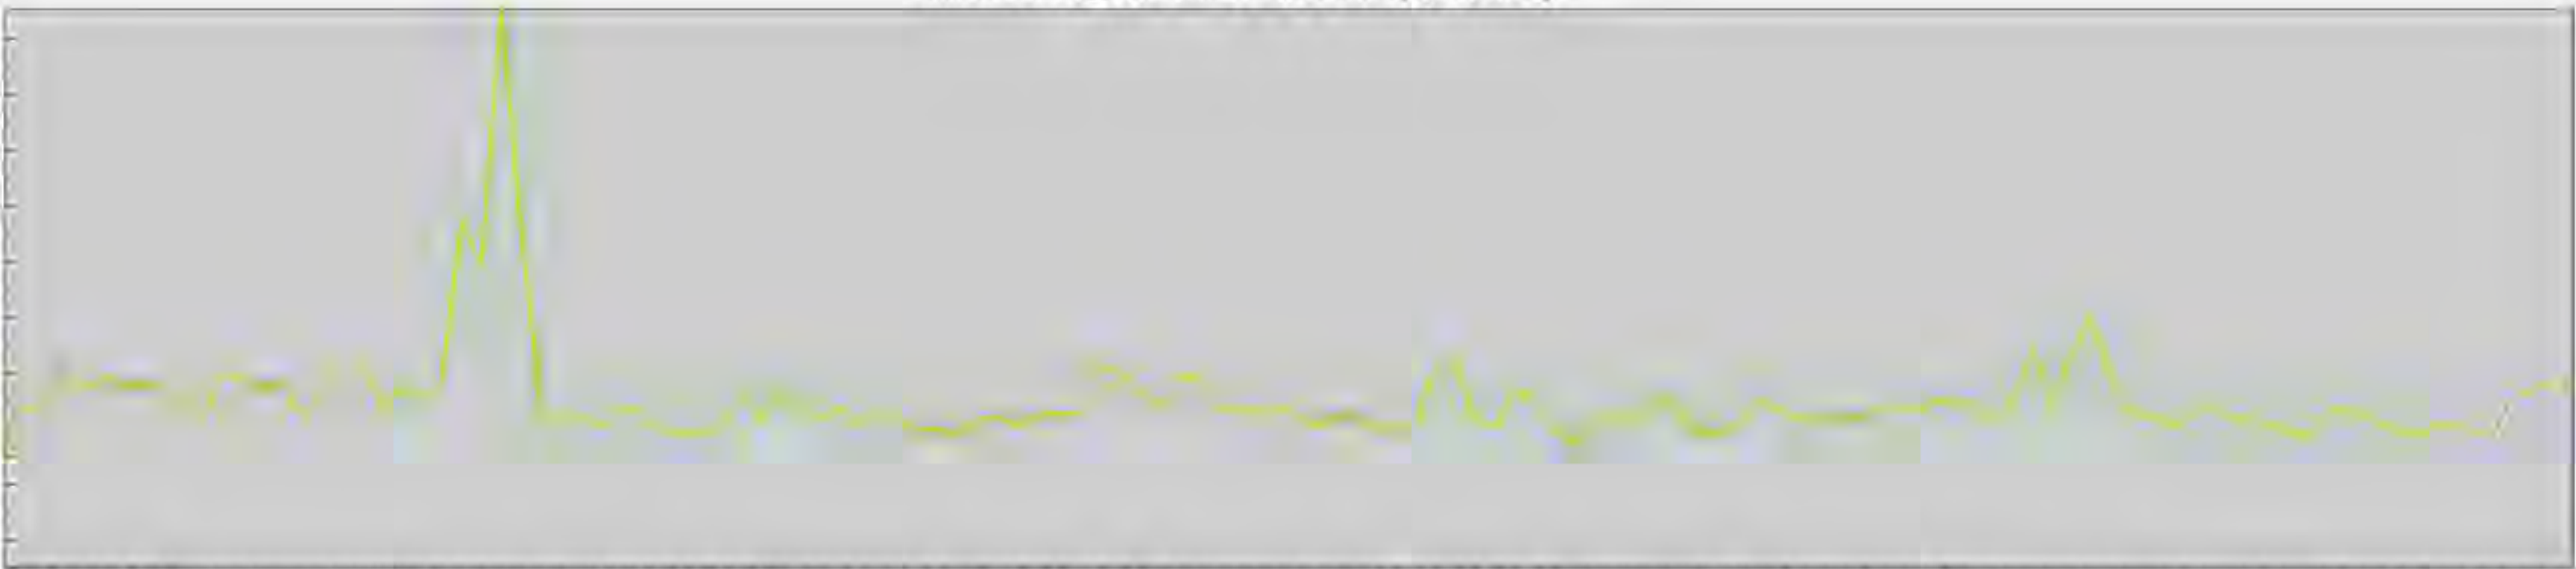

130-NALT GSM289411.CEL  
 129-NALT GSM289410.CEL  
 128-NALT GSM289409.CEL  
 127-NALT GSM289408.CEL  
 126-Colon-d9 GSM1988105.CEL  
 125-Colon-d9 GSM1988104.CEL  
 124-Colon-d9 GSM1988103.CEL  
 123-Colon-d4 GSM1988102.CEL  
 122-Colon-d4 GSM1988101.CEL  
 121-Intestine-large GSM258676.CEL  
 120-Intestine-large GSM258675.CEL  
 119-Intestine-small GSM258678.CEL  
 118-Intestine-small GSM258692.CEL  
 117-Lymph-nodes GSM258691.CEL  
 116-Lymph-nodes GSM258726.CEL  
 115-Spleen GSM258767.CEL  
 114-Spleen GSM258767.CEL  
 113-Neuro2a GSM258728.CEL  
 112-Neuro2a GSM258727.CEL  
 111-Astrocytes GSM241898.CEL  
 110-mim6 GSM258726.CEL  
 109-mim6 GSM258725.CEL  
 108-MIMCD3 GSM258724.CEL  
 107-MIMCD3 GSM258723.CEL  
 106-Bruce4 GSM258656.CEL  
 105-Bruce4 GSM258656.CEL  
 104-C2C12 GSM258690.CEL  
 103-C2C12 GSM258629.CEL  
 102-NH3T3 GSM258739.CEL  
 101-NH3T3 GSM258739.CEL  
 100-3T3-L1 GSM258610.CEL  
 99-3T3-L1 GSM258609.CEL  
 98-10T12 GSM258632.CEL  
 97-10T12 GSM258631.CEL  
 96-Osteoblast-d21 GSM258740.CEL  
 95-Osteoblast-d21 GSM258739.CEL  
 94-Osteoblast-d14 GSM258738.CEL  
 93-Osteoblast-d14 GSM258737.CEL  
 92-Osteoblast-d5 GSM258742.CEL  
 91-Osteoblast-d5 GSM258741.CEL  
 90-Chondrocytes GSM266741.CEL  
 89-Chondrocytes GSM266740.CEL  
 88-Nat Helper cell GSM465594.CEL  
 87-Nat Helper cell GSM465593.CEL  
 86-TT cell GSM465596.CEL  
 85-MS-1 GSM234692.CEL  
 84-Lymph-endo-cells GSM143704.CEL  
 83-PP-FDC GSM481977.CEL  
 82-PP-FDC GSM481978.CEL  
 81-PP-FDC GSM481976.CEL  
 80-LY-RMLNDCC003001.CEL  
 79-LY-RMLNDCC003001.CEL  
 78-Follicular-Bcells GSM258664.CEL  
 77-Follicular-Bcells GSM258664.CEL  
 76-MZ-Bcell GSM258627.CEL  
 75-MZ-Bcell GSM258627.CEL  
 74-BAF3 GSM258620.CEL  
 73-BAF3 GSM258619.CEL  
 72-Tregs GSM258778.CEL  
 71-Tregs GSM258777.CEL  
 70-T-cells-CD8+ GSM258776.CEL  
 69-T-cells-CD8+ GSM258775.CEL  
 68-T-cells-CD4+ GSM258774.CEL  
 67-T-cells-CD4+ GSM258773.CEL  
 66-Thymocyte-DN GSM465595.CEL  
 65-Osteoclasts GSM258743.CEL  
 64-Microglia GSM258721.CEL  
 63-Microglia GSM258721.CEL  
 62-MM-LPS-7h GSM258706.CEL  
 61-MM-LPS-7h GSM258706.CEL  
 60-MM-LPS-7h GSM258705.CEL  
 59-MM-LPS-6h GSM258700.CEL  
 58-MM-LPS-6h GSM258699.CEL  
 57-MM-LPS-6h GSM258699.CEL  
 56-MM-LPS-6h GSM258699.CEL  
 55-MM-LPS-6h GSM258699.CEL  
 54-MM-LPS-6h GSM258699.CEL  
 53-Plasmacytoid-DC GSM258650.CEL  
 52-Plasmacytoid-DC GSM258649.CEL  
 51-CD8a-DC GSM258648.CEL  
 50-CD8a-DC GSM258647.CEL  
 49-CD8a+DC GSM258646.CEL  
 48-CD8a+DC GSM258646.CEL  
 47-NK-cells GSM258732.CEL  
 46-NK-cells GSM258731.CEL  
 45-Mast-cells-IgE+Ad GSM258718.CEL  
 44-Mast-cells-IgE+Ad GSM258717.CEL  
 43-Mast-cells-IgE GSM258714.CEL  
 42-Mast-cells-IgE GSM258713.CEL  
 41-Mast-cells GSM258712.CEL  
 40-Granulocytes GSM258668.CEL  
 39-Granulocytes GSM258667.CEL  
 38-GMP GSM258666.CEL  
 37-GMP GSM258666.CEL  
 36-GMP GSM258666.CEL  
 35-GMP GSM258666.CEL  
 34-GMP GSM258666.CEL  
 33-MEP GSM258720.CEL  
 32-MEP GSM258720.CEL  
 31-MEP GSM258720.CEL  
 30-HESC GSM258770.CEL  
 29-Bone marrow GSM258628.CEL  
 28-Bone marrow GSM258627.CEL  
 27-paneth-cells-GF GSM116358.CEL  
 26-paneth-cells-GF GSM116357.CEL  
 25-paneth-cells GSM116350.CEL  
 24-paneth-cells GSM116359.CEL  
 23-paneth-cells GSM318589.CEL  
 22-paneth-cells GSM318590.CEL  
 21-Colon-Crypt GSM480375.CEL  
 20-Colon-Crypt GSM480374.CEL  
 19-Colon-Vill GSM480363.CEL  
 18-Colon-Vill GSM480362.CEL  
 17-Colon-IEC-GF GSM349880.CEL  
 16-Colon-IEC-GF GSM350375.CEL  
 15-Ileum-IEC-TGF GSM350376.CEL  
 14-Ileum-IEC GSM350371.CEL  
 13-Small-intestine-epithelium RMINEP002001.CEL  
 12-Small-intestine-epithelium RMINEP001001.CEL  
 11-FAE-RMPYEP002001.CEL  
 10-FAE-RMPYEP001001.CEL  
 09-Ileum-IEC GSM190797.CEL  
 08-Ileum-IEC GSM190796.CEL  
 07-Ileum-IEC GSM190795.CEL  
 06-CT-v-M-cells GSM190794.CEL  
 05-CT-v-M-cells GSM190793.CEL  
 04-PP-M-cells GSM190792.CEL  
 03-PP-M-cells GSM190791.CEL  
 02-PP-M-cells GSM190790.CEL  
 01-PP-M-cells GSM190789.CEL



Cluster0228\_Uncertain (9 nodes)

1,083.1  
1,026.1  
969.1  
912.1  
855  
798  
741  
684  
627  
570  
513  
456  
399  
342  
285  
228  
171  
114  
57  
0

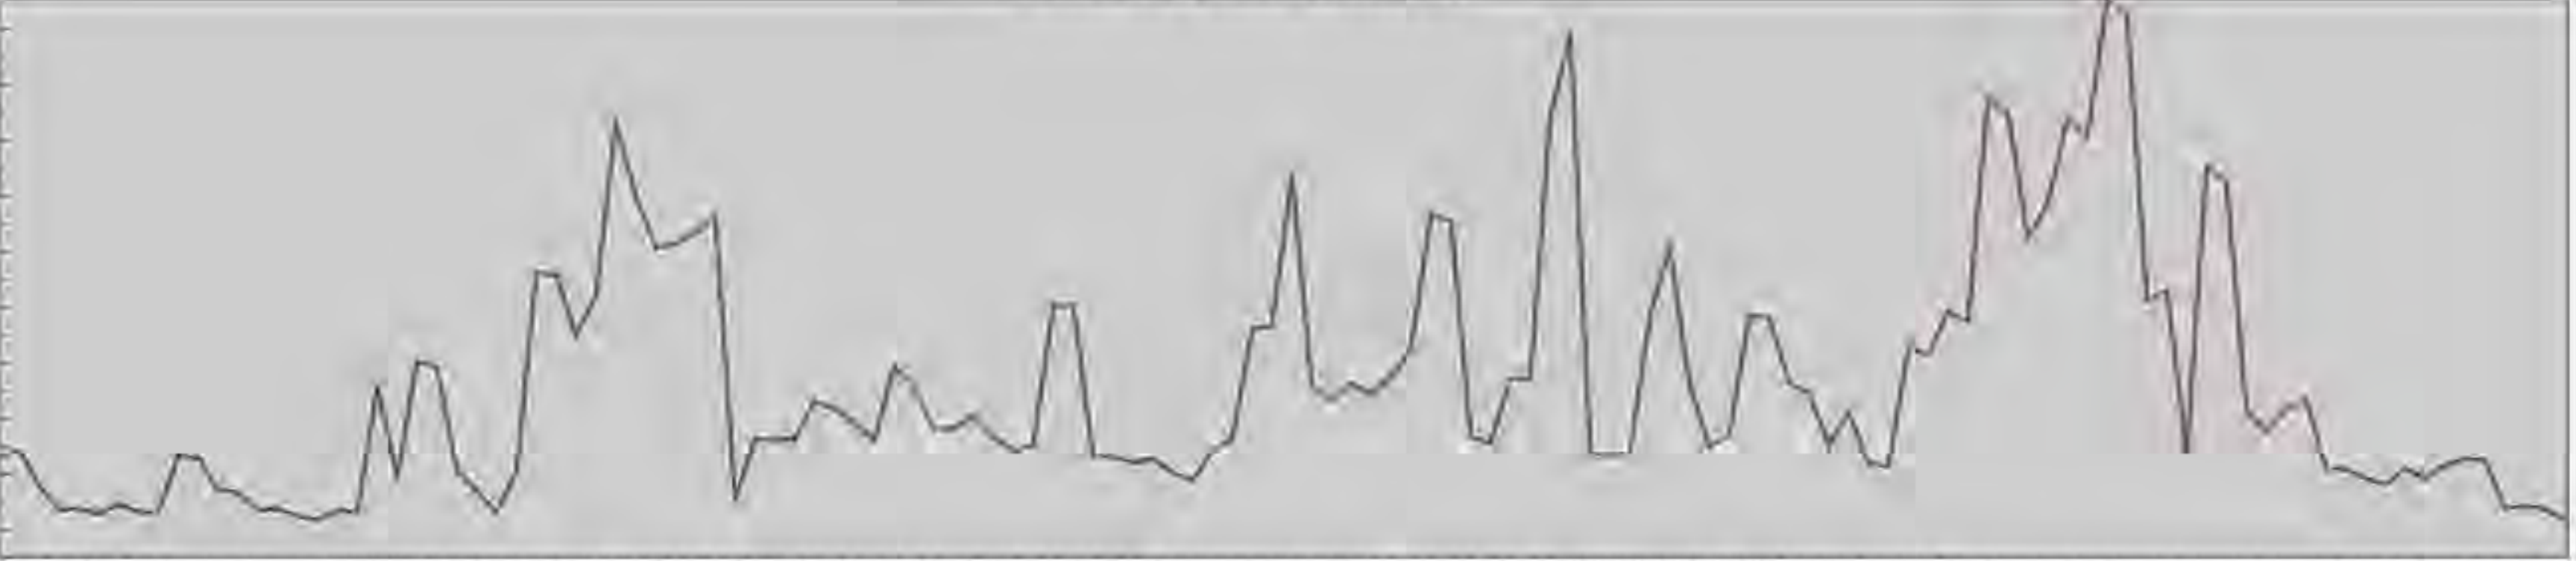

130-NALT GSM289411.CEL  
129-NALT GSM289410.CEL  
128-NALT GSM289409.CEL  
127-NALT GSM289408.CEL  
126-Colon-d9 GSM1988105.CEL  
125-Colon-d9 GSM1988103.CEL  
124-Colon-d9 GSM1988102.CEL  
123-Colon-d4 GSM1988101.CEL  
122-Colon-d4 GSM1988101.CEL  
121-Intestine-large GSM258676.CEL  
120-Intestine-large GSM258675.CEL  
119-Intestine-small GSM258678.CEL  
118-Intestine-small GSM258692.CEL  
117-Lymph-nodes GSM258691.CEL  
116-Lymph-nodes GSM258726.CEL  
115-Spleen GSM258767.CEL  
114-Spleen GSM258767.CEL  
113-Neuro2a GSM258728.CEL  
112-Neuro2a GSM258727.CEL  
111-Astrocytes GSM241898.CEL  
110-ming GSM258725.CEL  
109-ming GSM258725.CEL  
108-MIMCD3 GSM258723.CEL  
107-MIMCD3 GSM258723.CEL  
106-Bruce4 GSM258656.CEL  
105-Bruce4 GSM258656.CEL  
104-C2C12 GSM258690.CEL  
103-C2C12 GSM258629.CEL  
102-NH3T3 GSM258730.CEL  
101-NH3T3 GSM258729.CEL  
100-3T3-L1 GSM258610.CEL  
99-3T3-L1 GSM258609.CEL  
98-10T12 GSM258632.CEL  
97-10T12 GSM258631.CEL  
96-Osteoblast-d21 GSM258740.CEL  
95-Osteoblast-d21 GSM258739.CEL  
94-Osteoblast-d14 GSM258738.CEL  
93-Osteoblast-d14 GSM258737.CEL  
92-Osteoblast-d5 GSM258742.CEL  
91-Osteoblast-d5 GSM258741.CEL  
90-Chondrocytes GSM266741.CEL  
89-Chondrocytes GSM266740.CEL  
88-Nat Helper cell GSM465594.CEL  
87-Nat Helper cell GSM465593.CEL  
86-LT cell GSM465596.CEL  
85-MS-1 GSM234692.CEL  
84-Lymph-endo-cells GSM143704.CEL  
83-P-FDC GSM481977.CEL  
82-P-FDC GSM481978.CEL  
81-P-FDC GSM481976.CEL  
80-L-Y RMLNDCC003001.CEL  
79-L-Y RMLNDCC003001.CEL  
78-Follicular-Bcells GSM258664.CEL  
77-Follicular-Bcells GSM258663.CEL  
76-MZ-Bcell GSM258627.CEL  
75-MZ-Bcell GSM258627.CEL  
74-BAF3 GSM258620.CEL  
73-BAF3 GSM258619.CEL  
72-Tregs GSM258778.CEL  
71-T-cells CD8+ GSM258777.CEL  
70-T-cells CD8+ GSM258775.CEL  
69-T-cells CD4+ GSM258774.CEL  
68-T-cells CD4+ GSM258773.CEL  
67-Thymocyte-DN GSM465595.CEL  
66-Osteoclasts GSM258743.CEL  
65-Microglia GSM258721.CEL  
62-Microglia GSM258721.CEL  
61-PM-M-PS-7h GSM258706.CEL  
60-PM-M-PS-7h GSM258705.CEL  
59-PM-M-PS-7d GSM258702.CEL  
58-PM-M-PS-6h GSM258700.CEL  
57-PM-M-PS-6h GSM258699.CEL  
56-PM-M-PS-6h GSM258699.CEL  
55-BMM-LPS-6h GSM258694.CEL  
54-BMM-LPS-6h GSM258694.CEL  
53-Plasmacytoid-DC GSM258650.CEL  
52-Plasmacytoid-DC GSM258649.CEL  
51-CD8a-DC GSM258648.CEL  
50-CD8a-DC GSM258647.CEL  
49-CD8a+DC GSM258646.CEL  
48-CD8a+DC GSM258645.CEL  
47-NK-cells GSM258732.CEL  
46-NK-cells GSM258731.CEL  
45-Mast-cells-IgE+Ad GSM258718.CEL  
44-Mast-cells-IgE+Ad GSM258717.CEL  
43-Mast-cells-IgE GSM258714.CEL  
42-Mast-cells-IgE GSM258713.CEL  
41-Mast-cells GSM258712.CEL  
40-Granulocytes GSM258668.CEL  
39-Granulocytes GSM258667.CEL  
38-GMP GSM258666.CEL  
37-GMP GSM258666.CEL  
36-GMP GSM258665.CEL  
35-GMP GSM258664.CEL  
34-MEP GSM2588720.CEL  
33-MEP GSM2588719.CEL  
32-MEP GSM2588719.CEL  
31-HSC GSM2588719.CEL  
30-HSC GSM2588719.CEL  
29-Bone marrow GSM2588628.CEL  
28-Bone marrow GSM2588627.CEL  
27-paneth-cells-GF GSM116358.CEL  
26-paneth-cells-GF GSM116357.CEL  
25-paneth-cells GSM116350.CEL  
24-paneth-cells GSM116359.CEL  
23-paneth-cells GSM318589.CEL  
22-paneth-cells GSM318590.CEL  
21-paneth-cells GSM480375.CEL  
20-paneth-cells GSM480374.CEL  
19-paneth-cells GSM480363.CEL  
18-paneth-cells GSM480362.CEL  
17-paneth-cells GSM349880.CEL  
16-paneth-cells GSM350375.CEL  
15-paneth-cells GSM350376.CEL  
14-paneth-cells GSM350371.CEL  
13-paneth-cells GSM258627.CEL  
12-paneth-cells GSM258627.CEL  
11-paneth-cells GSM258627.CEL  
10-paneth-cells GSM258627.CEL  
9-paneth-cells GSM258627.CEL  
8-paneth-cells GSM258627.CEL  
7-paneth-cells GSM258627.CEL  
6-paneth-cells GSM258627.CEL  
5-paneth-cells GSM258627.CEL  
4-paneth-cells GSM258627.CEL  
3-paneth-cells GSM258627.CEL  
2-paneth-cells GSM258627.CEL  
1-paneth-cells GSM258627.CEL



### Cluster0229\_High in Paneth cells (9 nodes)

2,271.6  
2,152.1  
2,032.5  
1,912.9  
1,793.4  
1,673.8  
1,554.3  
1,434.7  
1,315.2  
1,195.6  
1,076  
956.5  
836.9  
717.4  
597.8  
478.2  
358.7  
239.1  
119.6  
0

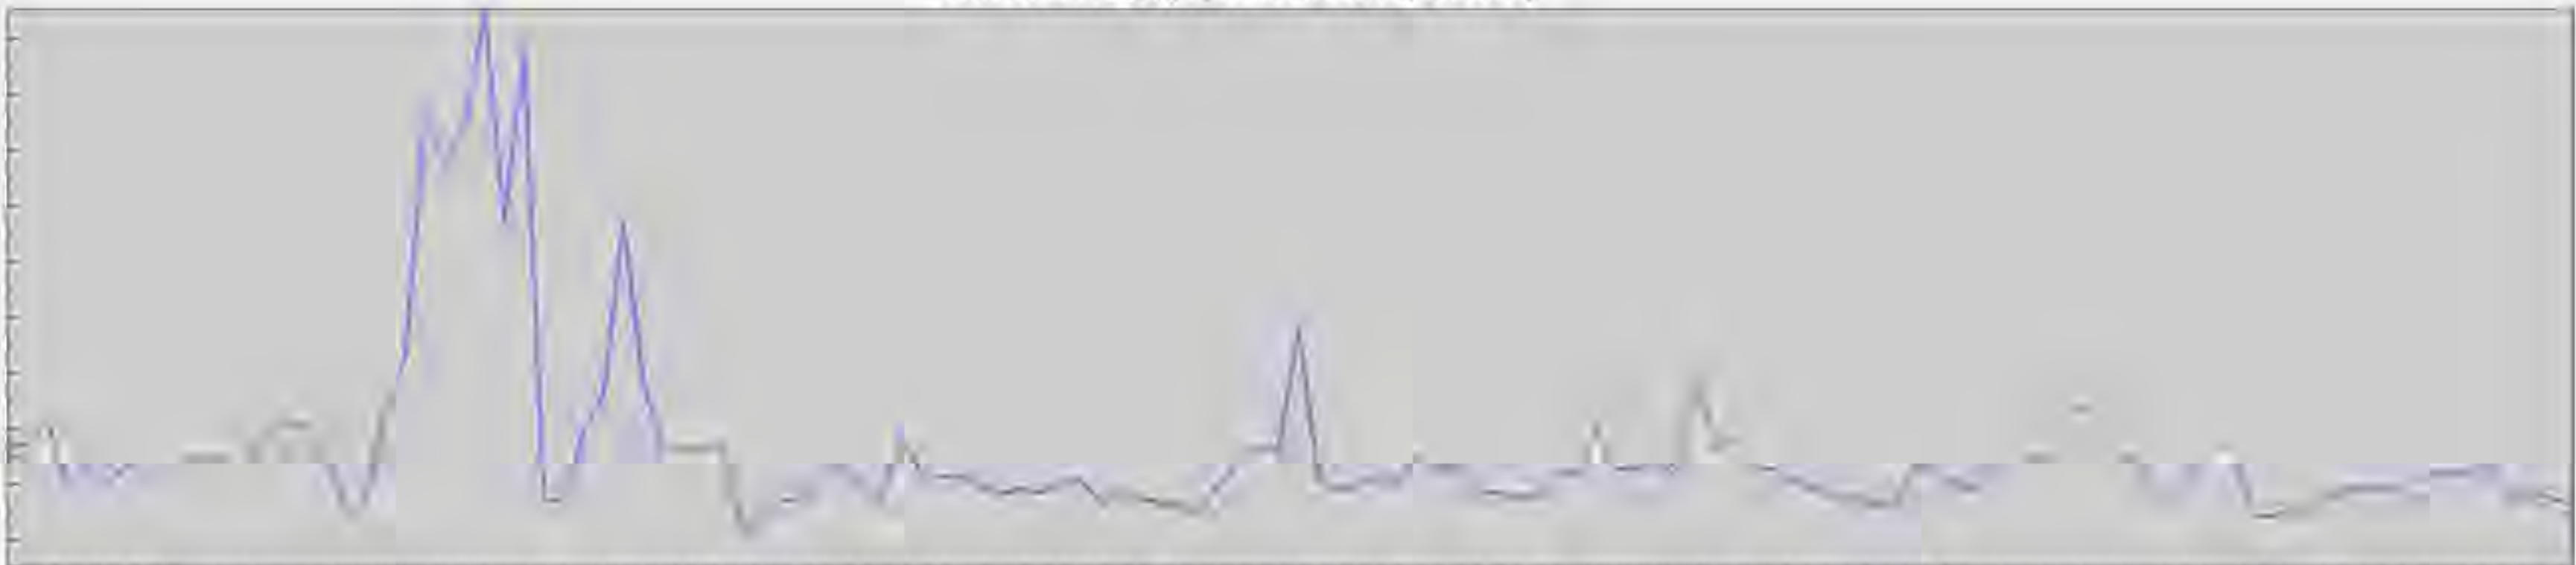

130-NALT GSM289411 CELL  
 129-NALT GSM289410 CELL  
 128-NALT GSM289409 CELL  
 127-NALT GSM289408 CELL  
 126- Colon-d9 GSM1988105 CELL  
 125- Colon-d9 GSM1988104 CELL  
 124- Colon-d9 GSM1988103 CELL  
 123- Colon-d4 GSM1988102 CELL  
 122- Colon-d4 GSM1988101 CELL  
 121- Intestine-large GSM258676 CELL  
 120- Intestine-large GSM258675 CELL  
 119- Intestine-small GSM258674 CELL  
 118- Intestine-small GSM258673 CELL  
 117- Lymph-nodes GSM258672 CELL  
 116- Lymph-nodes GSM258671 CELL  
 115- Spleen GSM258767 CELL  
 114- Spleen GSM258766 CELL  
 113- Neuro2a GSM258728 CELL  
 112- Neuro2a GSM258727 CELL  
 111- Astrocytes GSM241898 CELL  
 110- mimb GSM258726 CELL  
 109- mimb GSM258725 CELL  
 108- MIMCD3 GSM258724 CELL  
 107- MIMCD3 GSM258723 CELL  
 106- Bruce4 GSM258665 CELL  
 105- Bruce4 GSM258664 CELL  
 104- C2C12 GSM258690 CELL  
 103- C2C12 GSM258689 CELL  
 102- NIH3T3 GSM258730 CELL  
 101- NIH3T3 GSM258729 CELL  
 100- 3T3-L1 GSM258610 CELL  
 99- 3T3-L1 GSM258609 CELL  
 98- 10T1/2 GSM258632 CELL  
 97- 10T1/2 GSM258631 CELL  
 96- Osteoblast-d21 GSM258740 CELL  
 95- Osteoblast-d21 GSM258739 CELL  
 94- Osteoblast-d14 GSM258738 CELL  
 93- Osteoblast-d14 GSM258737 CELL  
 92- Osteoblast-d5 GSM258742 CELL  
 91- Osteoblast-d5 GSM258741 CELL  
 90- Chondrocytes GSM266741 CELL  
 89- Chondrocytes GSM266740 CELL  
 88- Nat Helper cell GSM465594 CELL  
 87- Nat Helper cell GSM465593 CELL  
 86- T cell GSM465596 CELL  
 85- MS-1 GSM234692 CELL  
 84- Lymph-endo-cells GSM143704 CELL  
 83- PP-FDC GSM481977 CELL  
 82- PP-FDC GSM481978 CELL  
 81- PP-FDC GSM481976 CELL  
 80- FLY RMLNDCC003001 CELL  
 79- FLY RMLNDCC003001 CELL  
 78- Follicular-Bcells GSM258664 CELL  
 77- Follicular-Bcells GSM258663 CELL  
 76- MZ-Bcell GSM258627 CELL  
 75- MZ-Bcell GSM258621 CELL  
 74- BAF3 GSM258620 CELL  
 73- BAF3 GSM258619 CELL  
 72- Tregs GSM258778 CELL  
 71- Tregs GSM258777 CELL  
 70- T-cells-CD8+ GSM258776 CELL  
 69- T-cells-CD8+ GSM258774 CELL  
 68- T-cells-CD4+ GSM258773 CELL  
 67- T-cells-CD4+ GSM258744 CELL  
 66- Thymocyte-DN GSM465595 CELL  
 65- Osteoclasts GSM258743 CELL  
 64- Microglia GSM258721 CELL  
 63- Microglia GSM258721 CELL  
 62- PMM-LPS-7h GSM268706 CELL  
 61- PMM-LPS-7h GSM268705 CELL  
 60- PMM-LPS-6h GSM258702 CELL  
 59- PMM-LPS-6h GSM258701 CELL  
 58- BMM-LPS-6h GSM268699 CELL  
 57- BMM-LPS-6h GSM268699 CELL  
 56- BMM-LPS-6h GSM258694 CELL  
 55- BMM-LPS-6h GSM258694 CELL  
 54- BMM-LPS-6h GSM258694 CELL  
 53- BMM-LPS-6h GSM258694 CELL  
 52- BMM-LPS-6h GSM258694 CELL  
 51- BMM-LPS-6h GSM258694 CELL  
 50- CD8a-DC GSM258647 CELL  
 49- CD8a-DC GSM258646 CELL  
 48- CD8a+DC GSM258646 CELL  
 47- NK-cells GSM258732 CELL  
 46- NK-cells GSM258731 CELL  
 45- Mast-cells-IgE+Ad GSM258718 CELL  
 44- Mast-cells-IgE+Ad GSM258717 CELL  
 43- Mast-cells-IgE GSM258714 CELL  
 42- Mast-cells-IgE GSM258713 CELL  
 41- Mast-cells GSM258712 CELL  
 40- Mast-cells GSM258711 CELL  
 39- Granulocytes GSM258668 CELL  
 38- Granulocytes GSM258667 CELL  
 37- GMP GSM258666 CELL  
 36- GMP GSM258665 CELL  
 35- GMP GSM258664 CELL  
 34- GMP GSM258642 CELL  
 33- MIEP GSM2588720 CELL  
 32- MIEP GSM2588719 CELL  
 31- HESC GSM258770 CELL  
 30- HESC GSM258769 CELL  
 29- Bone marrow GSM258628 CELL  
 28- Bone marrow GSM258627 CELL  
 27- Paneth-cells-GF-1 GSM116357 CELL  
 26- Paneth-cells-GF-1 GSM116350 CELL  
 25- Paneth-cells GSM116359 CELL  
 24- Paneth-cells GSM116359 CELL  
 23- Paneth-cells GSM318590 CELL  
 22- Paneth-cells GSM318590 CELL  
 21- Colon-Crypt GSM480375 CELL  
 20- Colon-Crypt GSM480374 CELL  
 19- Colon-Vill GSM480363 CELL  
 18- Colon-Vill GSM480362 CELL  
 17- Colon-IEC-GF GSM349880 CELL  
 16- Colon-IEC-GF GSM350375 CELL  
 15- Ileum-IEC-GF GSM350376 CELL  
 14- Ileum-IEC GSM350371 CELL  
 13- Small-intestine-epithelium RMINEP002901 CELL  
 12- Small-intestine-epithelium RMINEP001001 CELL  
 11- FAE-RMPYEP002001 CELL  
 10- FAE-RMPYEP001001 CELL  
 09- Ileum-IEC GSM190797 CELL  
 08- Ileum-IEC GSM190796 CELL  
 07- Ileum-IEC GSM190795 CELL  
 06- CT-v-M-cells GSM190794 CELL  
 05- CT-v-M-cells GSM190793 CELL  
 04- CT-v-M-cells GSM190792 CELL  
 03- PP-M-cells GSM190791 CELL  
 02- PP-M-cells GSM190790 CELL  
 01- PP-M-cells GSM190789 CELL







## Cluster0231\_intestine-related (9 nodes)

6,863.8  
6,502.6  
6,141.3  
5,780.1  
5,418.8  
5,057.6  
4,696.3  
4,335.1  
3,973.8  
3,612.6  
3,251.3  
2,890  
2,528.8  
2,167.5  
1,806.3  
1,445  
1,083.6  
722.5  
361.3  
0

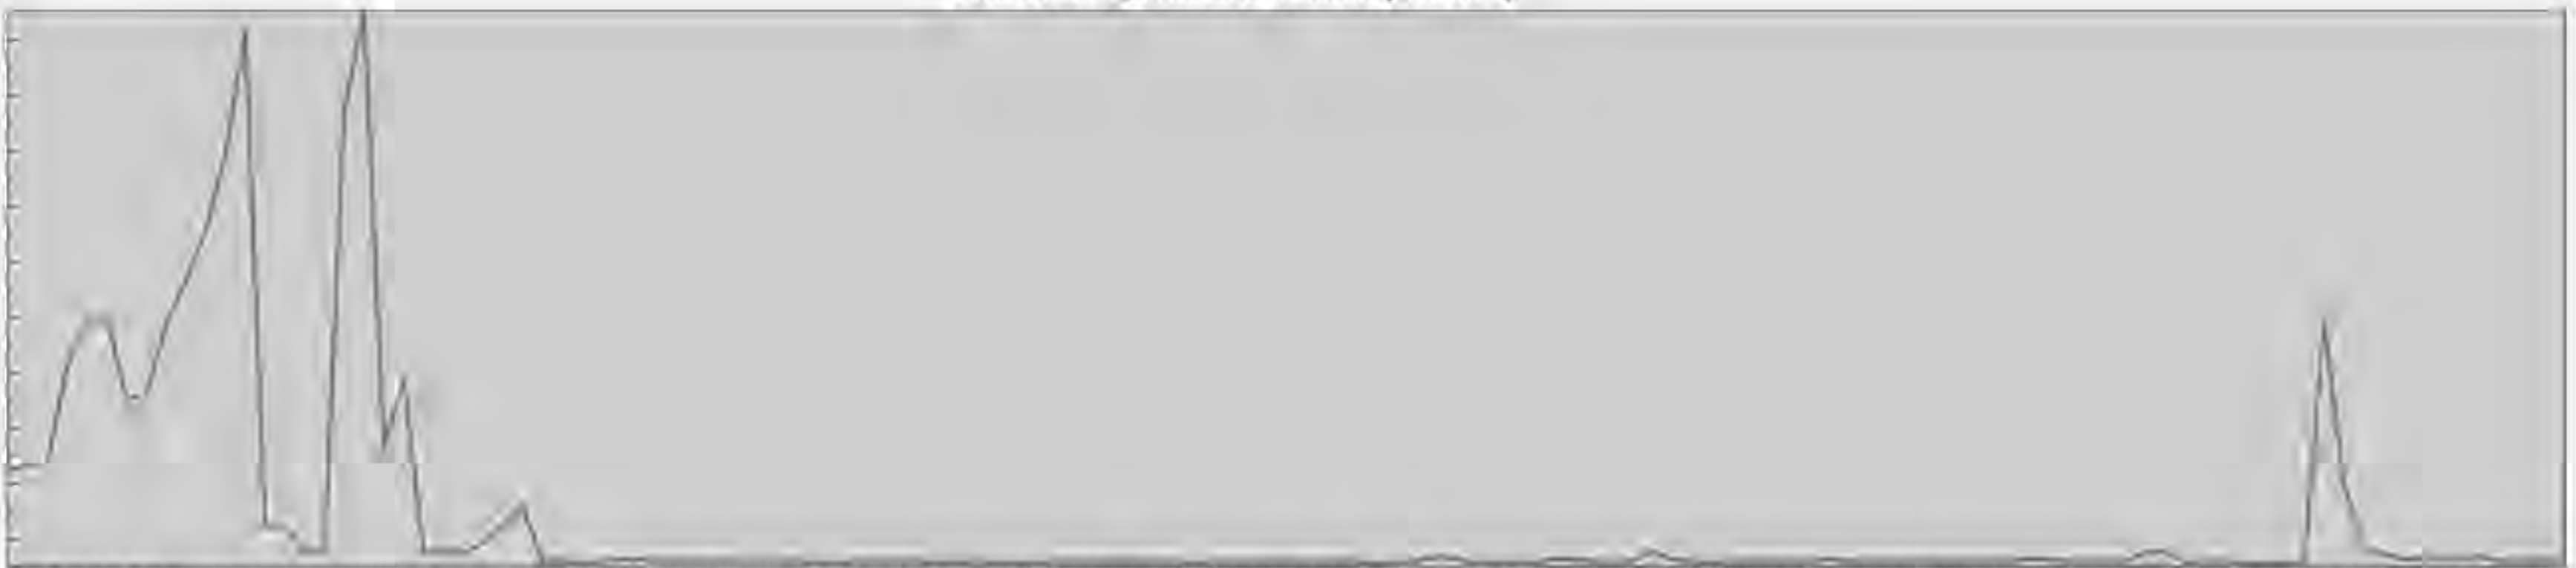

30-NALT GSM289411 CELL  
 129-NALT GSM289410 CELL  
 128-NALT GSM289409 CELL  
 127-NALT GSM289408 CELL  
 126-Color-d9 GSM1988105 CELL  
 125-Color-d9 GSM1988104 CELL  
 124-Color-d9 GSM1988103 CELL  
 123-Color-d4 GSM1988102 CELL  
 122-Color-d4 GSM1988101 CELL  
 121-Intestine-large GSM258676 CELL  
 120-Intestine-large GSM258675 CELL  
 119-Intestine-small GSM258674 CELL  
 118-Intestine-small GSM258673 CELL  
 117-Lymph-nodes GSM258672 CELL  
 116-Lymph-nodes GSM258671 CELL  
 115-Spleen GSM258670 CELL  
 114-Spleen GSM258669 CELL  
 113-Neuro2a GSM241898 CELL  
 112-Neuro2a GSM241897 CELL  
 111-Astrocytes GSM241896 CELL  
 110-mimb GSM258726 CELL  
 109-mimb GSM258725 CELL  
 108-MIMCD3 GSM258724 CELL  
 107-MIMCD3 GSM258723 CELL  
 106-Bruce4 GSM258665 CELL  
 105-Bruce4 GSM258664 CELL  
 104-C2C12 GSM258663 CELL  
 103-C2C12 GSM258662 CELL  
 102-NH3T3 GSM258739 CELL  
 101-NH3T3 GSM258738 CELL  
 100-3T3-L1 GSM258610 CELL  
 99-3T3-L1 GSM258609 CELL  
 98-10T12 GSM258632 CELL  
 97-10T12 GSM258631 CELL  
 96-Osteoblast-d21 GSM258740 CELL  
 95-Osteoblast-d21 GSM258739 CELL  
 94-Osteoblast-d14 GSM258738 CELL  
 93-Osteoblast-d14 GSM258737 CELL  
 92-Osteoblast-d5 GSM258742 CELL  
 91-Osteoblast-d5 GSM258741 CELL  
 90-Chondrocytes GSM266741 CELL  
 89-Chondrocytes GSM266740 CELL  
 88-Nat Helper cell GSM465594 CELL  
 87-Nat Helper cell GSM465593 CELL  
 86-TT cell GSM465596 CELL  
 85-MS-1 GSM234692 CELL  
 84-Lymph-endo-cells GSM143704 CELL  
 83-PP-FDC GSM481977 CELL  
 82-PP-FDC GSM481978 CELL  
 81-PP-FDC GSM481976 CELL  
 80-D-FY RMLNDCC003001 CELL  
 79-D-FY RMLNDCC003001 CELL  
 78-Follicular-Bcells GSM258664 CELL  
 77-Follicular-Bcells GSM258663 CELL  
 76-MZ-Bcell GSM258627 CELL  
 75-MZ-Bcell GSM258627 CELL  
 74-BAF3 GSM258620 CELL  
 73-BAF3 GSM258619 CELL  
 72-Tregs GSM258778 CELL  
 71-Tregs GSM258777 CELL  
 70-T-cells-CD8+ GSM258776 CELL  
 69-T-cells-CD8+ GSM258774 CELL  
 68-T-cells-CD4+ GSM258773 CELL  
 67-T-cells-CD4+ GSM258744 CELL  
 66-Thymocyte-DN GSM465595 CELL  
 65-Osteoclasts GSM258743 CELL  
 64-Osteoclasts GSM258743 CELL  
 63-Microglia GSM258721 CELL  
 62-Microglia GSM258721 CELL  
 61-MM-PS-7h GSM258706 CELL  
 60-MM-PS-7h GSM258706 CELL  
 59-MM-PS-6h GSM258702 CELL  
 58-MM-PS-6h GSM258702 CELL  
 57-MM-LPS-6h GSM258699 CELL  
 56-MM-LPS-6h GSM258699 CELL  
 55-MM-LPS-6h GSM258694 CELL  
 54-MM-LPS-6h GSM258694 CELL  
 53-Ismacryoid-DC GSM258650 CELL  
 52-Ismacryoid-DC GSM258649 CELL  
 51-CD8a-DC GSM258648 CELL  
 50-CD8a-DC GSM258647 CELL  
 49-CD8a+DC GSM258646 CELL  
 48-CD8a+DC GSM258646 CELL  
 47-NK-cells GSM258732 CELL  
 46-NK-cells GSM258731 CELL  
 45-Mast-cells-IgE+Ad GSM258718 CELL  
 44-Mast-cells-IgE+Ad GSM258717 CELL  
 43-Mast-cells-IgE GSM258714 CELL  
 42-Mast-cells-IgE GSM258713 CELL  
 41-Mast-cells GSM258712 CELL  
 40-Granulocytes GSM258667 CELL  
 39-Granulocytes GSM258667 CELL  
 38-GMP GSM258666 CELL  
 37-GMP GSM258665 CELL  
 36-GMP GSM258664 CELL  
 35-CMP GSM258642 CELL  
 34-MECP GSM258641 CELL  
 33-MECP GSM258770 CELL  
 32-HESC GSM258770 CELL  
 31-HESC GSM258769 CELL  
 30-Bone marrow GSM258628 CELL  
 29-Bone marrow GSM258627 CELL  
 28-Paneth-cells-GE GSM116358 CELL  
 27-Paneth-cells-GE GSM116357 CELL  
 26-Paneth-cells-GE GSM116350 CELL  
 25-Paneth-cells GSM116350 CELL  
 24-Paneth-cells GSM116359 CELL  
 23-Paneth-cells GSM318589 CELL  
 22-Paneth-cells GSM318590 CELL  
 21-Color-Crypt GSM480375 cel  
 20-Color-Crypt GSM480374 cel  
 19-Color-Vill GSM480363 cel  
 18-Color-Vill GSM480362 cel  
 17-Color-IEC-Gf GSM349880 CELL  
 16-Color-IEC-Gf GSM350375 CELL  
 15-Ileum-IEC-Gf GSM350376 CELL  
 14-Ileum-IEC GSM350371 CELL  
 13-Small-intestine-epithelium RMINEP002901 CELL  
 12-Small-intestine-epithelium RMINEP001001 CELL  
 11-FAE-RMPYEP002001 CELL  
 10-FAE-RMPYEP001001 CELL  
 09-Ileum-IEC GSM190797 CELL  
 08-Ileum-IEC GSM190796 CELL  
 07-Ileum-IEC GSM190795 CELL  
 06-CT-w-M-cells GSM190794 CELL  
 05-CT-y-M-cells GSM190793 CELL  
 04-PP-M-cells GSM190792 CELL  
 03-PP-M-cells GSM190791 CELL  
 02-PP-M-cells GSM190790 CELL  
 01-PP-M-cells GSM190789 CELL



Cluster0232\_intestine-related (9 nodes)

801.7  
759.5  
717.3  
675.1  
632.9  
590.7  
548.5  
506.3  
464.1  
421.9  
379.7  
337.5  
295.4  
253.2  
211  
168.8  
126.6  
84.4  
42.2  
0

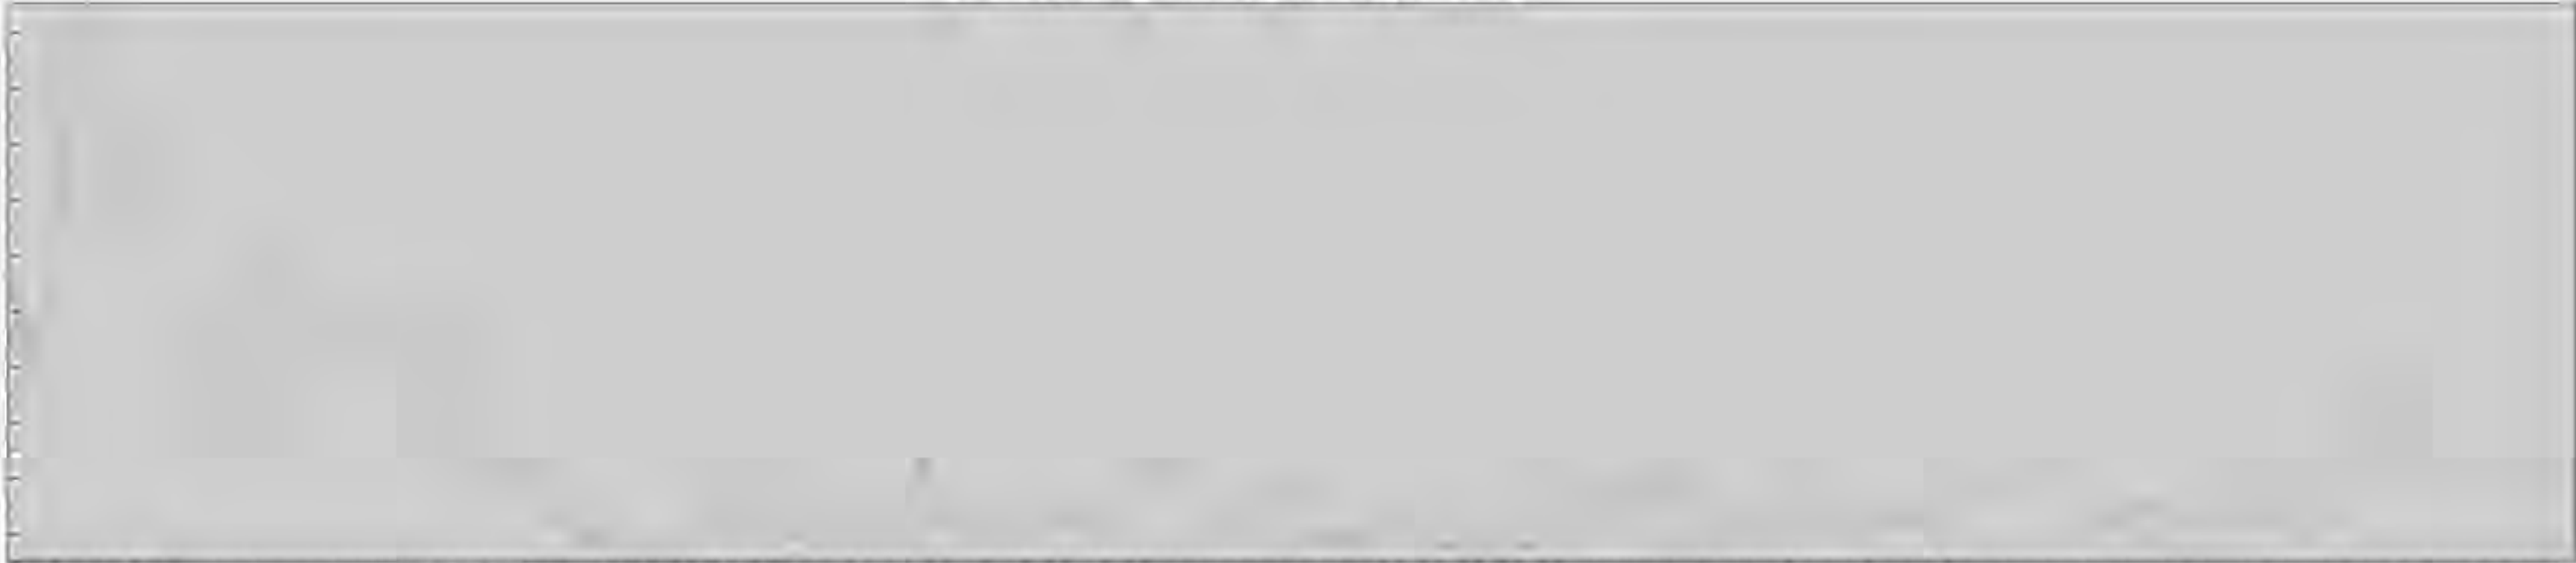

|     |                            |              |     |
|-----|----------------------------|--------------|-----|
| 01  | PP-M-cells                 | GSM190789    | CEL |
| 02  | PP-M-cells                 | GSM190790    | CEL |
| 03  | PP-M-cells                 | GSM190791    | CEL |
| 04  | CT-y-M-cells               | GSM190792    | CEL |
| 05  | CT-y-M-cells               | GSM190793    | CEL |
| 06  | CT-w-M-cells               | GSM190794    | CEL |
| 07  | Ileum-EC                   | GSM190795    | CEL |
| 08  | Ileum-EC                   | GSM190796    | CEL |
| 09  | Ileum-EC                   | GSM190797    | CEL |
| 10  | FAE-RMP                    | GSM190798    | CEL |
| 11  | FAE-RMP                    | GSM190799    | CEL |
| 12  | Small-intestine-epithelium | RMINEP001001 | CEL |
| 13  | Small-intestine-epithelium | RMINEP002001 | CEL |
| 14  | Ileum-EC                   | GSM350371    | CEL |
| 15  | Ileum-EC                   | GSM350375    | CEL |
| 16  | Colon-EC                   | GSM349880    | CEL |
| 17  | Colon-VIII                 | GSM480362    | cel |
| 18  | Colon-VIII                 | GSM480363    | cel |
| 19  | Colon-VIII                 | GSM480364    | cel |
| 20  | Colon-Crypt                | GSM480374    | cel |
| 21  | Colon-Crypt                | GSM480375    | cel |
| 22  | Paneth-cells               | GSM318590    | CEL |
| 23  | Paneth-cells               | GSM318589    | CEL |
| 24  | Paneth-cells               | GSM116359    | CEL |
| 25  | Paneth-cells               | GSM116350    | CEL |
| 26  | Paneth-cells               | GSM116357    | CEL |
| 27  | Paneth-cells               | GSM116358    | CEL |
| 28  | Bone marrow                | GSM258627    | CEL |
| 29  | Bone marrow                | GSM258628    | CEL |
| 30  | HS                         | GSM258770    | CEL |
| 31  | HS                         | GSM258771    | CEL |
| 32  | MEP                        | GSM258772    | CEL |
| 33  | MEP                        | GSM258773    | CEL |
| 34  | MEP                        | GSM258774    | CEL |
| 35  | MEP                        | GSM258775    | CEL |
| 36  | MEP                        | GSM258776    | CEL |
| 37  | MEP                        | GSM258777    | CEL |
| 38  | MEP                        | GSM258778    | CEL |
| 39  | Granulocytes               | GSM258779    | CEL |
| 40  | Mast-cells                 | GSM258781    | CEL |
| 41  | Mast-cells                 | GSM258782    | CEL |
| 42  | Mast-cells                 | GSM258783    | CEL |
| 43  | Mast-cells                 | GSM258784    | CEL |
| 44  | Mast-cells                 | GSM258785    | CEL |
| 45  | Mast-cells                 | GSM258786    | CEL |
| 46  | NK-cells                   | GSM258787    | CEL |
| 47  | NK-cells                   | GSM258788    | CEL |
| 48  | CD8a+DC                    | GSM258646    | CEL |
| 49  | CD8a+DC                    | GSM258647    | CEL |
| 50  | CD8a+DC                    | GSM258648    | CEL |
| 51  | CD8a+DC                    | GSM258649    | CEL |
| 52  | CD8a+DC                    | GSM258650    | CEL |
| 53  | CD8a+DC                    | GSM258651    | CEL |
| 54  | CD8a+DC                    | GSM258652    | CEL |
| 55  | CD8a+DC                    | GSM258653    | CEL |
| 56  | CD8a+DC                    | GSM258654    | CEL |
| 57  | CD8a+DC                    | GSM258655    | CEL |
| 58  | CD8a+DC                    | GSM258656    | CEL |
| 59  | CD8a+DC                    | GSM258657    | CEL |
| 60  | CD8a+DC                    | GSM258658    | CEL |
| 61  | CD8a+DC                    | GSM258659    | CEL |
| 62  | Microglia                  | GSM258721    | CEL |
| 63  | Microglia                  | GSM258722    | CEL |
| 64  | Microglia                  | GSM258723    | CEL |
| 65  | Osteoclasts                | GSM258743    | CEL |
| 66  | Osteoclasts                | GSM258744    | CEL |
| 67  | Thymocyte-DN               | GSM465595    | CEL |
| 68  | Thymocyte-DN               | GSM465596    | CEL |
| 69  | T-cells-CD4+               | GSM258773    | CEL |
| 70  | T-cells-CD4+               | GSM258774    | CEL |
| 71  | T-cells-CD4+               | GSM258775    | CEL |
| 72  | T-cells-CD4+               | GSM258776    | CEL |
| 73  | Tregs                      | GSM258778    | CEL |
| 74  | Tregs                      | GSM258779    | CEL |
| 75  | Tregs                      | GSM258780    | CEL |
| 76  | Tregs                      | GSM258781    | CEL |
| 77  | Tregs                      | GSM258782    | CEL |
| 78  | Follicular-B-cells         | GSM258664    | CEL |
| 79  | Follicular-B-cells         | GSM258665    | CEL |
| 80  | Follicular-B-cells         | GSM258666    | CEL |
| 81  | Follicular-B-cells         | GSM258667    | CEL |
| 82  | Follicular-B-cells         | GSM258668    | CEL |
| 83  | Follicular-B-cells         | GSM258669    | CEL |
| 84  | Follicular-B-cells         | GSM258670    | CEL |
| 85  | Follicular-B-cells         | GSM258671    | CEL |
| 86  | Follicular-B-cells         | GSM258672    | CEL |
| 87  | Follicular-B-cells         | GSM258673    | CEL |
| 88  | Follicular-B-cells         | GSM258674    | CEL |
| 89  | Follicular-B-cells         | GSM258675    | CEL |
| 90  | Follicular-B-cells         | GSM258676    | CEL |
| 91  | Follicular-B-cells         | GSM258677    | CEL |
| 92  | Follicular-B-cells         | GSM258678    | CEL |
| 93  | Follicular-B-cells         | GSM258679    | CEL |
| 94  | Follicular-B-cells         | GSM258680    | CEL |
| 95  | Follicular-B-cells         | GSM258681    | CEL |
| 96  | Follicular-B-cells         | GSM258682    | CEL |
| 97  | Follicular-B-cells         | GSM258683    | CEL |
| 98  | Follicular-B-cells         | GSM258684    | CEL |
| 99  | Follicular-B-cells         | GSM258685    | CEL |
| 100 | Follicular-B-cells         | GSM258686    | CEL |
| 101 | Follicular-B-cells         | GSM258687    | CEL |
| 102 | Follicular-B-cells         | GSM258688    | CEL |
| 103 | Follicular-B-cells         | GSM258689    | CEL |
| 104 | Follicular-B-cells         | GSM258690    | CEL |
| 105 | Follicular-B-cells         | GSM258691    | CEL |
| 106 | Follicular-B-cells         | GSM258692    | CEL |
| 107 | Follicular-B-cells         | GSM258693    | CEL |
| 108 | Follicular-B-cells         | GSM258694    | CEL |
| 109 | Follicular-B-cells         | GSM258695    | CEL |
| 110 | Follicular-B-cells         | GSM258696    | CEL |
| 111 | Follicular-B-cells         | GSM258697    | CEL |
| 112 | Follicular-B-cells         | GSM258698    | CEL |
| 113 | Follicular-B-cells         | GSM258699    | CEL |
| 114 | Follicular-B-cells         | GSM258700    | CEL |
| 115 | Follicular-B-cells         | GSM258701    | CEL |
| 116 | Follicular-B-cells         | GSM258702    | CEL |
| 117 | Follicular-B-cells         | GSM258703    | CEL |
| 118 | Follicular-B-cells         | GSM258704    | CEL |
| 119 | Follicular-B-cells         | GSM258705    | CEL |
| 120 | Follicular-B-cells         | GSM258706    | CEL |
| 121 | Follicular-B-cells         | GSM258707    | CEL |
| 122 | Follicular-B-cells         | GSM258708    | CEL |
| 123 | Follicular-B-cells         | GSM258709    | CEL |
| 124 | Follicular-B-cells         | GSM258710    | CEL |
| 125 | Follicular-B-cells         | GSM258711    | CEL |
| 126 | Follicular-B-cells         | GSM258712    | CEL |
| 127 | Follicular-B-cells         | GSM258713    | CEL |
| 128 | Follicular-B-cells         | GSM258714    | CEL |
| 129 | Follicular-B-cells         | GSM258715    | CEL |
| 130 | Follicular-B-cells         | GSM258716    | CEL |
| 131 | Follicular-B-cells         | GSM258717    | CEL |
| 132 | Follicular-B-cells         | GSM258718    | CEL |
| 133 | Follicular-B-cells         | GSM258719    | CEL |
| 134 | Follicular-B-cells         | GSM258720    | CEL |
| 135 | Follicular-B-cells         | GSM258721    | CEL |
| 136 | Follicular-B-cells         | GSM258722    | CEL |
| 137 | Follicular-B-cells         | GSM258723    | CEL |
| 138 | Follicular-B-cells         | GSM258724    | CEL |
| 139 | Follicular-B-cells         | GSM258725    | CEL |
| 140 | Follicular-B-cells         | GSM258726    | CEL |
| 141 | Follicular-B-cells         | GSM258727    | CEL |
| 142 | Follicular-B-cells         | GSM258728    | CEL |
| 143 | Follicular-B-cells         | GSM258729    | CEL |
| 144 | Follicular-B-cells         | GSM258730    | CEL |
| 145 | Follicular-B-cells         | GSM258731    | CEL |
| 146 | Follicular-B-cells         | GSM258732    | CEL |
| 147 | Follicular-B-cells         | GSM258733    | CEL |
| 148 | Follicular-B-cells         | GSM258734    | CEL |
| 149 | Follicular-B-cells         | GSM258735    | CEL |
| 150 | Follicular-B-cells         | GSM258736    | CEL |
| 151 | Follicular-B-cells         | GSM258737    | CEL |
| 152 | Follicular-B-cells         | GSM258738    | CEL |
| 153 | Follicular-B-cells         | GSM258739    | CEL |
| 154 | Follicular-B-cells         | GSM258740    | CEL |
| 155 | Follicular-B-cells         | GSM258741    | CEL |
| 156 | Follicular-B-cells         | GSM258742    | CEL |
| 157 | Follicular-B-cells         | GSM258743    | CEL |
| 158 | Follicular-B-cells         | GSM258744    | CEL |
| 159 | Follicular-B-cells         | GSM258745    | CEL |
| 160 | Follicular-B-cells         | GSM258746    | CEL |
| 161 | Follicular-B-cells         | GSM258747    | CEL |
| 162 | Follicular-B-cells         | GSM258748    | CEL |
| 163 | Follicular-B-cells         | GSM258749    | CEL |
| 164 | Follicular-B-cells         | GSM258750    | CEL |
| 165 | Follicular-B-cells         | GSM258751    | CEL |
| 166 | Follicular-B-cells         | GSM258752    | CEL |
| 167 | Follicular-B-cells         | GSM258753    | CEL |
| 168 | Follicular-B-cells         | GSM258754    | CEL |
| 169 | Follicular-B-cells         | GSM258755    | CEL |
| 170 | Follicular-B-cells         | GSM258756    | CEL |
| 171 | Follicular-B-cells         | GSM258757    | CEL |
| 172 | Follicular-B-cells         | GSM258758    | CEL |
| 173 | Follicular-B-cells         | GSM258759    | CEL |
| 174 | Follicular-B-cells         | GSM258760    | CEL |
| 175 | Follicular-B-cells         | GSM258761    | CEL |
| 176 | Follicular-B-cells         | GSM258762    | CEL |
| 177 | Follicular-B-cells         | GSM258763    | CEL |
| 178 | Follicular-B-cells         | GSM258764    | CEL |
| 179 | Follicular-B-cells         | GSM258765    | CEL |
| 180 | Follicular-B-cells         | GSM258766    | CEL |
| 181 | Follicular-B-cells         | GSM258767    | CEL |
| 182 | Follicular-B-cells         | GSM258768    | CEL |
| 183 | Follicular-B-cells         | GSM258769    | CEL |
| 184 | Follicular-B-cells         | GSM258770    | CEL |
| 185 | Follicular-B-cells         | GSM258771    | CEL |
| 186 | Follicular-B-cells         | GSM258772    | CEL |
| 187 | Follicular-B-cells         | GSM258773    | CEL |
| 188 | Follicular-B-cells         | GSM258774    | CEL |
| 189 | Follicular-B-cells         | GSM258775    | CEL |
| 190 | Follicular-B-cells         | GSM258776    | CEL |
| 191 | Follicular-B-cells         | GSM258777    | CEL |
| 192 | Follicular-B-cells         | GSM258778    | CEL |
| 193 | Follicular-B-cells         | GSM258779    | CEL |
| 194 | Follicular-B-cells         | GSM258780    | CEL |
| 195 | Follicular-B-cells         | GSM258781    | CEL |
| 196 | Follicular-B-cells         | GSM258782    | CEL |
| 197 | Follicular-B-cells         | GSM258783    | CEL |
| 198 | Follicular-B-cells         | GSM258784    | CEL |
| 199 | Follicular-B-cells         | GSM258785    | CEL |
| 200 | Follicular-B-cells         | GSM258786    | CEL |



Cluster0233\_Uncertain-low in many (9 nodes)

92.2  
87.3  
82.5  
77.6  
72.8  
67.9  
63.1  
58.2  
53.4  
48.5  
43.7  
38.8  
34  
29.1  
24.3  
19.4  
14.6  
9.7  
4.9  
0

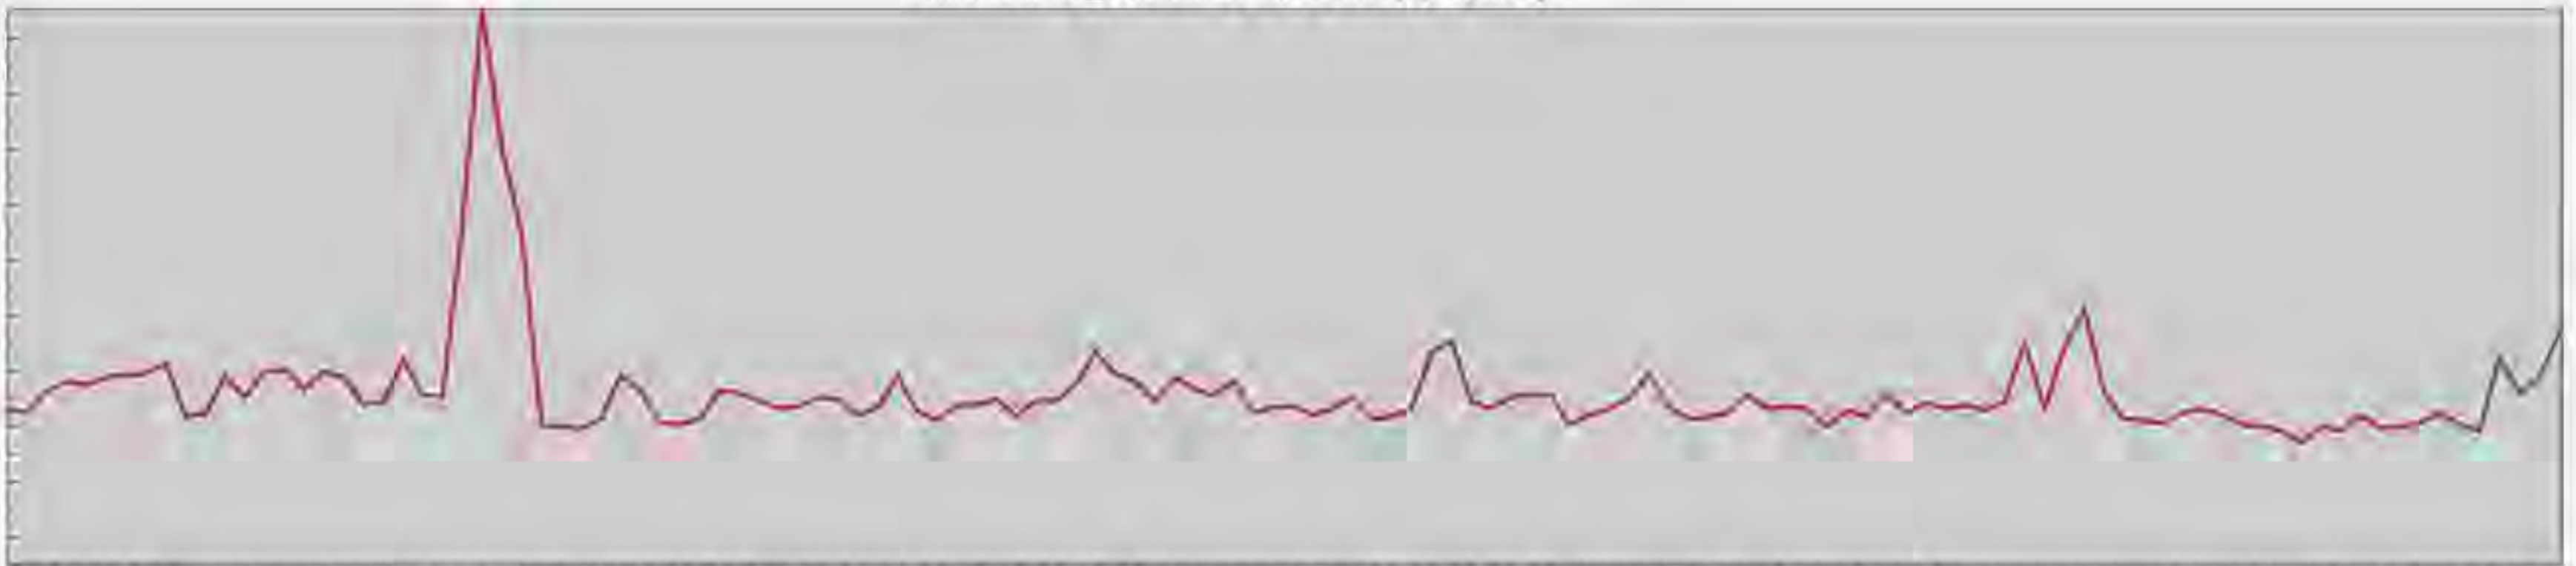

130-NALT GSM289411.CEL  
129-NALT GSM289410.CEL  
128-NALT GSM289409.CEL  
127-NALT GSM289408.CEL  
126-paneth-cells GSM1988105.CEL  
125-paneth-cells GSM1988104.CEL  
124-paneth-cells GSM1988103.CEL  
123-paneth-cells GSM1988102.CEL  
122-paneth-cells GSM318589.CEL  
121-paneth-cells GSM318590.CEL  
120-paneth-cells GSM480375.CEL  
119-paneth-cells GSM480374.CEL  
118-paneth-cells GSM480362.CEL  
117-paneth-cells GSM480363.CEL  
116-paneth-cells GSM116350.CEL  
115-paneth-cells GSM116357.CEL  
114-paneth-cells GSM116358.CEL  
113-paneth-cells GSM116359.CEL  
112-paneth-cells GSM116359.CEL  
111-paneth-cells GSM116359.CEL  
110-paneth-cells GSM116359.CEL  
109-paneth-cells GSM116359.CEL  
108-paneth-cells GSM116359.CEL  
107-paneth-cells GSM116359.CEL  
106-paneth-cells GSM116359.CEL  
105-paneth-cells GSM116359.CEL  
104-paneth-cells GSM116359.CEL  
103-paneth-cells GSM116359.CEL  
102-paneth-cells GSM116359.CEL  
101-paneth-cells GSM116359.CEL  
100-paneth-cells GSM116359.CEL  
99-paneth-cells GSM116359.CEL  
98-paneth-cells GSM116359.CEL  
97-paneth-cells GSM116359.CEL  
96-paneth-cells GSM116359.CEL  
95-paneth-cells GSM116359.CEL  
94-paneth-cells GSM116359.CEL  
93-paneth-cells GSM116359.CEL  
92-paneth-cells GSM116359.CEL  
91-paneth-cells GSM116359.CEL  
90-paneth-cells GSM116359.CEL  
89-paneth-cells GSM116359.CEL  
88-paneth-cells GSM116359.CEL  
87-paneth-cells GSM116359.CEL  
86-paneth-cells GSM116359.CEL  
85-paneth-cells GSM116359.CEL  
84-paneth-cells GSM116359.CEL  
83-paneth-cells GSM116359.CEL  
82-paneth-cells GSM116359.CEL  
81-paneth-cells GSM116359.CEL  
80-paneth-cells GSM116359.CEL  
79-paneth-cells GSM116359.CEL  
78-paneth-cells GSM116359.CEL  
77-paneth-cells GSM116359.CEL  
76-paneth-cells GSM116359.CEL  
75-paneth-cells GSM116359.CEL  
74-paneth-cells GSM116359.CEL  
73-paneth-cells GSM116359.CEL  
72-paneth-cells GSM116359.CEL  
71-paneth-cells GSM116359.CEL  
70-paneth-cells GSM116359.CEL  
69-paneth-cells GSM116359.CEL  
68-paneth-cells GSM116359.CEL  
67-paneth-cells GSM116359.CEL  
66-paneth-cells GSM116359.CEL  
65-paneth-cells GSM116359.CEL  
64-paneth-cells GSM116359.CEL  
63-paneth-cells GSM116359.CEL  
62-paneth-cells GSM116359.CEL  
61-paneth-cells GSM116359.CEL  
60-paneth-cells GSM116359.CEL  
59-paneth-cells GSM116359.CEL  
58-paneth-cells GSM116359.CEL  
57-paneth-cells GSM116359.CEL  
56-paneth-cells GSM116359.CEL  
55-paneth-cells GSM116359.CEL  
54-paneth-cells GSM116359.CEL  
53-paneth-cells GSM116359.CEL  
52-paneth-cells GSM116359.CEL  
51-paneth-cells GSM116359.CEL  
50-paneth-cells GSM116359.CEL  
49-paneth-cells GSM116359.CEL  
48-paneth-cells GSM116359.CEL  
47-paneth-cells GSM116359.CEL  
46-paneth-cells GSM116359.CEL  
45-paneth-cells GSM116359.CEL  
44-paneth-cells GSM116359.CEL  
43-paneth-cells GSM116359.CEL  
42-paneth-cells GSM116359.CEL  
41-paneth-cells GSM116359.CEL  
40-paneth-cells GSM116359.CEL  
39-paneth-cells GSM116359.CEL  
38-paneth-cells GSM116359.CEL  
37-paneth-cells GSM116359.CEL  
36-paneth-cells GSM116359.CEL  
35-paneth-cells GSM116359.CEL  
34-paneth-cells GSM116359.CEL  
33-paneth-cells GSM116359.CEL  
32-paneth-cells GSM116359.CEL  
31-paneth-cells GSM116359.CEL  
30-paneth-cells GSM116359.CEL  
29-paneth-cells GSM116359.CEL  
28-paneth-cells GSM116359.CEL  
27-paneth-cells GSM116359.CEL  
26-paneth-cells GSM116359.CEL  
25-paneth-cells GSM116359.CEL  
24-paneth-cells GSM116359.CEL  
23-paneth-cells GSM116359.CEL  
22-paneth-cells GSM116359.CEL  
21-paneth-cells GSM116359.CEL  
20-paneth-cells GSM116359.CEL  
19-paneth-cells GSM116359.CEL  
18-paneth-cells GSM116359.CEL  
17-paneth-cells GSM116359.CEL  
16-paneth-cells GSM116359.CEL  
15-paneth-cells GSM116359.CEL  
14-paneth-cells GSM116359.CEL  
13-paneth-cells GSM116359.CEL  
12-paneth-cells GSM116359.CEL  
11-paneth-cells GSM116359.CEL  
10-paneth-cells GSM116359.CEL  
9-paneth-cells GSM116359.CEL  
8-paneth-cells GSM116359.CEL  
7-paneth-cells GSM116359.CEL  
6-paneth-cells GSM116359.CEL  
5-paneth-cells GSM116359.CEL  
4-paneth-cells GSM116359.CEL  
3-paneth-cells GSM116359.CEL  
2-paneth-cells GSM116359.CEL  
1-paneth-cells GSM116359.CEL



Cluster0234\_House keeping-cell cycle (8 nodes)

642.2  
608.4  
574.6  
540.8  
507  
473.2  
439.4  
405.6  
371.8  
338  
304.2  
270.4  
236.6  
202.8  
169  
135.2  
101.4  
67.6  
33.8  
0

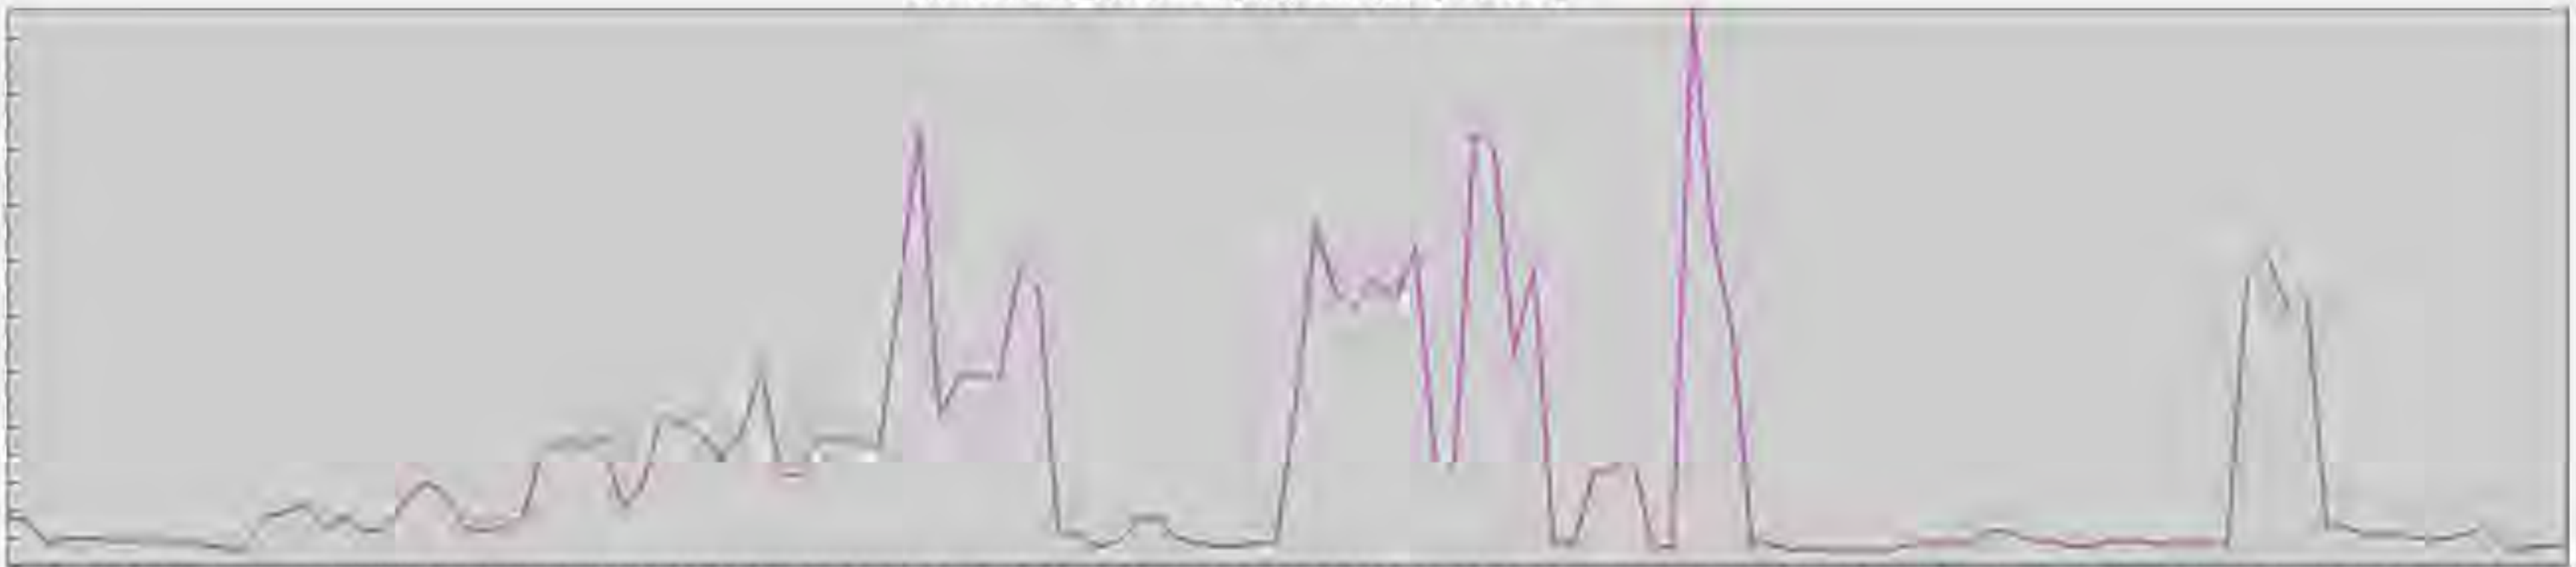

130-NALT GSM289411.CEL  
129-NALT GSM289410.CEL  
128-NALT GSM289409.CEL  
127-NALT GSM289408.CEL  
126-Colon-d9 GSM1988105.CEL  
125-Colon-d9 GSM1988104.CEL  
124-Colon-d9 GSM1988103.CEL  
123-Colon-d4 GSM1988102.CEL  
122-Colon-d4 GSM1988101.CEL  
121-Intestine-large GSM258676.CEL  
120-Intestine-large GSM258675.CEL  
119-Intestine-small GSM258678.CEL  
118-Intestine-small GSM258692.CEL  
117-Lymph-nodes GSM258691.CEL  
116-Lymph-nodes GSM258726.CEL  
115-Spleen GSM258767.CEL  
114-Spleen GSM258767.CEL  
113-Neuro2a GSM258728.CEL  
112-Neuro2a GSM258727.CEL  
111-Astrocytes GSM241898.CEL  
110-mim6 GSM258726.CEL  
109-mim6 GSM258725.CEL  
108-MIMCD3 GSM258724.CEL  
107-MIMCD3 GSM258723.CEL  
106-Bruce4 GSM258656.CEL  
105-Bruce4 GSM258656.CEL  
104-C2C12 GSM258690.CEL  
103-C2C12 GSM258629.CEL  
102-NH3T3 GSM258739.CEL  
101-NH3T3 GSM258739.CEL  
100-3T3-L1 GSM258610.CEL  
99-3T3-L1 GSM258609.CEL  
98-10T12 GSM258632.CEL  
97-10T12 GSM258631.CEL  
96-Osteoblast-d21 GSM258740.CEL  
95-Osteoblast-d21 GSM258739.CEL  
94-Osteoblast-d14 GSM258738.CEL  
93-Osteoblast-d14 GSM258737.CEL  
92-Osteoblast-d5 GSM258742.CEL  
91-Osteoblast-d5 GSM258741.CEL  
90-Chondrocytes GSM266741.CEL  
89-Chondrocytes GSM266740.CEL  
88-Nat Helper cell GSM465594.CEL  
87-Nat Helper cell GSM465593.CEL  
86-LT cell GSM465596.CEL  
85-MS-1 GSM234692.CEL  
84-Lymph-endg-cells GSM143704.CEL  
83-PP-FDC GSM481977.CEL  
82-PP-FDC GSM481978.CEL  
81-PP-FDC GSM481976.CEL  
80-LY-RMLNDCC003001.CEL  
79-LY-RMLNDCC003001.CEL  
78-Follicular-Bcells GSM258664.CEL  
77-Follicular-Bcells GSM258664.CEL  
76-MZ-Bcell GSM258627.CEL  
75-MZ-Bcell GSM258627.CEL  
74-BAF3 GSM258620.CEL  
73-BAF3 GSM258619.CEL  
72-Tregs GSM258778.CEL  
71-Tregs GSM258777.CEL  
70-T-cells-CD8+ GSM258776.CEL  
69-T-cells-CD8+ GSM258774.CEL  
68-T-cells-CD4+ GSM258773.CEL  
67-T-cells-CD4+ GSM258773.CEL  
66-Thymocyte-DN GSM465595.CEL  
65-Osteoclasts GSM258744.CEL  
64-Osteoclasts GSM258743.CEL  
63-Microglia GSM258721.CEL  
62-Microglia GSM258721.CEL  
61-MM-LPS-7h GSM258706.CEL  
60-MM-LPS-7h GSM258706.CEL  
59-MM-LPS-6h GSM258702.CEL  
58-MM-LPS-6h GSM258702.CEL  
57-MM-LPS-6h GSM258699.CEL  
56-MM-LPS-6h GSM258699.CEL  
55-BMM-GSM258694.CEL  
54-BMM-GSM258694.CEL  
53-Iasmacryoid-DC GSM258650.CEL  
52-Iasmacryoid-DC GSM258649.CEL  
51-CD8a-DC GSM258648.CEL  
50-CD8a-DC GSM258647.CEL  
49-CD8a+DC GSM258646.CEL  
48-CD8a+DC GSM258646.CEL  
47-NK-cells GSM258732.CEL  
46-NK-cells GSM258732.CEL  
45-Mast-cells-IgE+Ad GSM258718.CEL  
44-Mast-cells-IgE+Ad GSM258717.CEL  
43-Mast-cells-IgE GSM258714.CEL  
42-Mast-cells-IgE GSM258713.CEL  
41-Mast-cells GSM258712.CEL  
40-Granulocytes GSM258668.CEL  
39-Granulocytes GSM258667.CEL  
38-GMP GSM258666.CEL  
37-GMP GSM258666.CEL  
36-GMP GSM258665.CEL  
35-CMP GSM258642.CEL  
34-CMP GSM258642.CEL  
33-MEP GSM258720.CEL  
32-MEP GSM258719.CEL  
31-HESC GSM258770.CEL  
30-HESC GSM258770.CEL  
29-Bone marrow GSM258628.CEL  
28-Bone marrow GSM258627.CEL  
27-paneth-cells-GE GSM116358.CEL  
26-paneth-cells-GE GSM116357.CEL  
25-paneth-cells GSM116350.CEL  
24-paneth-cells GSM116359.CEL  
23-paneth-cells GSM318589.CEL  
22-paneth-cells GSM318590.CEL  
21-Colon-Crypt GSM480375.CEL  
20-Colon-Crypt GSM480374.CEL  
19-Colon-Vill GSM480363.CEL  
18-Colon-Vill GSM480362.CEL  
17-Colon-IEC-GE GSM349880.CEL  
16-Colon-IEC-GE GSM350375.CEL  
15-Ileum-IEC GSM350376.CEL  
14-Ileum-IEC GSM350371.CEL  
13-Small-intestine-epithelium RMINEP002901.CEL  
12-Small-intestine-epithelium RMINEP001001.CEL  
11-FAE-RMPYEP002001.CEL  
10-FAE-RMPYEP001001.CEL  
09-Ileum-IEC GSM190797.CEL  
08-Ileum-IEC GSM190796.CEL  
07-Ileum-IEC GSM190795.CEL  
06-CT-v-M-cells GSM190794.CEL  
05-CT-v-M-cells GSM190793.CEL  
04-PP-M-cells GSM190792.CEL  
03-PP-M-cells GSM190791.CEL  
02-PP-M-cells GSM190790.CEL  
01-PP-M-cells GSM190789.CEL



Cluster0235\_Uncertain (8 nodes)

1,049.1  
993.8  
938.6  
883.4  
828.2  
773  
717.8  
662.6  
607.3  
552.1  
496.9  
441.7  
386.5  
331.3  
278.1  
220.9  
165.6  
110.4  
55.2  
0

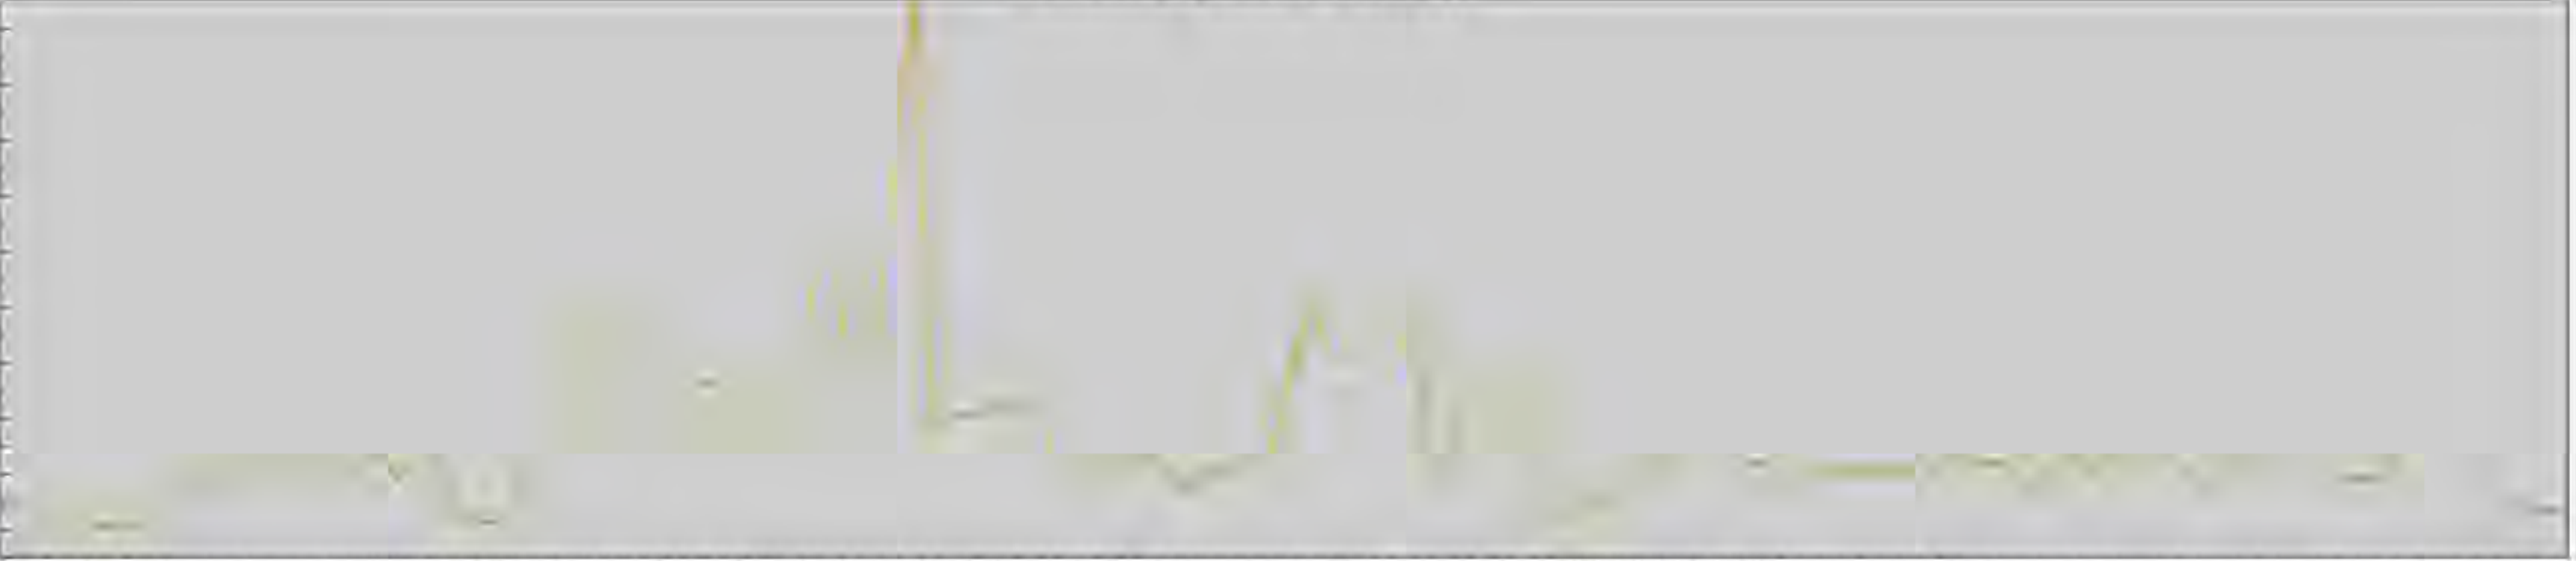

130-NALT GSM2894110.CEL  
 129-NALT GSM289410.CEL  
 128-NALT GSM289409.CEL  
 127-NALT GSM289408.CEL  
 126-CD9 GSM1988105.CEL  
 125-CD9 GSM1988104.CEL  
 124-CD9 GSM1988103.CEL  
 123-CD9 GSM1988102.CEL  
 122-CD9 GSM1988101.CEL  
 121-Intestine-large GSM258676.CEL  
 120-Intestine-large GSM258675.CEL  
 119-Intestine-small GSM258678.CEL  
 118-Intestine-small GSM258679.CEL  
 117-Lymph-nodes GSM258691.CEL  
 116-Lymph-nodes GSM258692.CEL  
 115-Spleen GSM258767.CEL  
 114-Spleen GSM258768.CEL  
 113-Neuro2a GSM258728.CEL  
 112-Neuro2a GSM258729.CEL  
 111-Astrocytes GSM241898.CEL  
 110-mim6 GSM258726.CEL  
 109-mim6 GSM258725.CEL  
 108-MIMCD3 GSM258724.CEL  
 107-MIMCD3 GSM258723.CEL  
 106-Bruce4 GSM258656.CEL  
 105-Bruce4 GSM258655.CEL  
 104-C2C12 GSM258690.CEL  
 103-C2C12 GSM258689.CEL  
 102-NH3T3 GSM258730.CEL  
 101-NH3T3 GSM258729.CEL  
 100-3T3-L1 GSM258610.CEL  
 99-3T3-L1 GSM258609.CEL  
 98-10T12 GSM258632.CEL  
 97-10T12 GSM258631.CEL  
 96-Osteoblast-d21 GSM258740.CEL  
 95-Osteoblast-d21 GSM258739.CEL  
 94-Osteoblast-d14 GSM258738.CEL  
 93-Osteoblast-d14 GSM258737.CEL  
 92-Osteoblast-d5 GSM258742.CEL  
 91-Osteoblast-d5 GSM258741.CEL  
 90-Chondrocytes GSM266741.CEL  
 89-Nat Helper cell GSM465594.CEL  
 88-Nat Helper cell GSM465593.CEL  
 87-LT cell GSM465596.CEL  
 86-MS-1 GSM234692.CEL  
 85-Lymph-endo-cells GSM143704.CEL  
 84-Lymph-endo-cells GSM481977.CEL  
 83-Lymph-endo-cells GSM481978.CEL  
 82-Lymph-endo-cells GSM481979.CEL  
 81-Lymph-endo-cells GSM481976.CEL  
 80-Lymph-endo-cells GSM481977.CEL  
 79-Lymph-endo-cells GSM481978.CEL  
 78-Lymph-endo-cells GSM481979.CEL  
 77-Follicular-Bcells GSM258664.CEL  
 76-MZ-Bcell GSM258627.CEL  
 75-MZ-Bcell GSM258627.CEL  
 74-BAF3 GSM258620.CEL  
 73-BAF3 GSM258619.CEL  
 72-Tregs GSM258778.CEL  
 71-Tregs GSM258777.CEL  
 70-T-cells-CD8+ GSM258776.CEL  
 69-T-cells-CD8+ GSM258775.CEL  
 68-T-cells-CD4+ GSM258774.CEL  
 67-T-cells-CD4+ GSM258773.CEL  
 66-Thymocyte-DN GSM465595.CEL  
 65-Osteoclasts GSM258743.CEL  
 64-Microglia GSM258721.CEL  
 63-Microglia GSM258721.CEL  
 62-Microglia GSM258721.CEL  
 61-Microglia GSM258721.CEL  
 60-Microglia GSM258721.CEL  
 59-Microglia GSM258721.CEL  
 58-Microglia GSM258721.CEL  
 57-Microglia GSM258721.CEL  
 56-Microglia GSM258721.CEL  
 55-Microglia GSM258721.CEL  
 54-Microglia GSM258721.CEL  
 53-Microglia GSM258721.CEL  
 52-Microglia GSM258721.CEL  
 51-Microglia GSM258721.CEL  
 50-Microglia GSM258721.CEL  
 49-Microglia GSM258721.CEL  
 48-Microglia GSM258721.CEL  
 47-Microglia GSM258721.CEL  
 46-Microglia GSM258721.CEL  
 45-Microglia GSM258721.CEL  
 44-Microglia GSM258721.CEL  
 43-Microglia GSM258721.CEL  
 42-Microglia GSM258721.CEL  
 41-Microglia GSM258721.CEL  
 40-Microglia GSM258721.CEL  
 39-Microglia GSM258721.CEL  
 38-Microglia GSM258721.CEL  
 37-Microglia GSM258721.CEL  
 36-Microglia GSM258721.CEL  
 35-Microglia GSM258721.CEL  
 34-Microglia GSM258721.CEL  
 33-Microglia GSM258721.CEL  
 32-Microglia GSM258721.CEL  
 31-Microglia GSM258721.CEL  
 30-Microglia GSM258721.CEL  
 29-Microglia GSM258721.CEL  
 28-Microglia GSM258721.CEL  
 27-Microglia GSM258721.CEL  
 26-Microglia GSM258721.CEL  
 25-Microglia GSM258721.CEL  
 24-Microglia GSM258721.CEL  
 23-Microglia GSM258721.CEL  
 22-Microglia GSM258721.CEL  
 21-Microglia GSM258721.CEL  
 20-Microglia GSM258721.CEL  
 19-Microglia GSM258721.CEL  
 18-Microglia GSM258721.CEL  
 17-Microglia GSM258721.CEL  
 16-Microglia GSM258721.CEL  
 15-Microglia GSM258721.CEL  
 14-Microglia GSM258721.CEL  
 13-Microglia GSM258721.CEL  
 12-Microglia GSM258721.CEL  
 11-Microglia GSM258721.CEL  
 10-Microglia GSM258721.CEL  
 9-Microglia GSM258721.CEL  
 8-Microglia GSM258721.CEL  
 7-Microglia GSM258721.CEL  
 6-Microglia GSM258721.CEL  
 5-Microglia GSM258721.CEL  
 4-Microglia GSM258721.CEL  
 3-Microglia GSM258721.CEL  
 2-Microglia GSM258721.CEL  
 1-Microglia GSM258721.CEL



Cluster0236\_Uncertain-low in many (8 nodes)

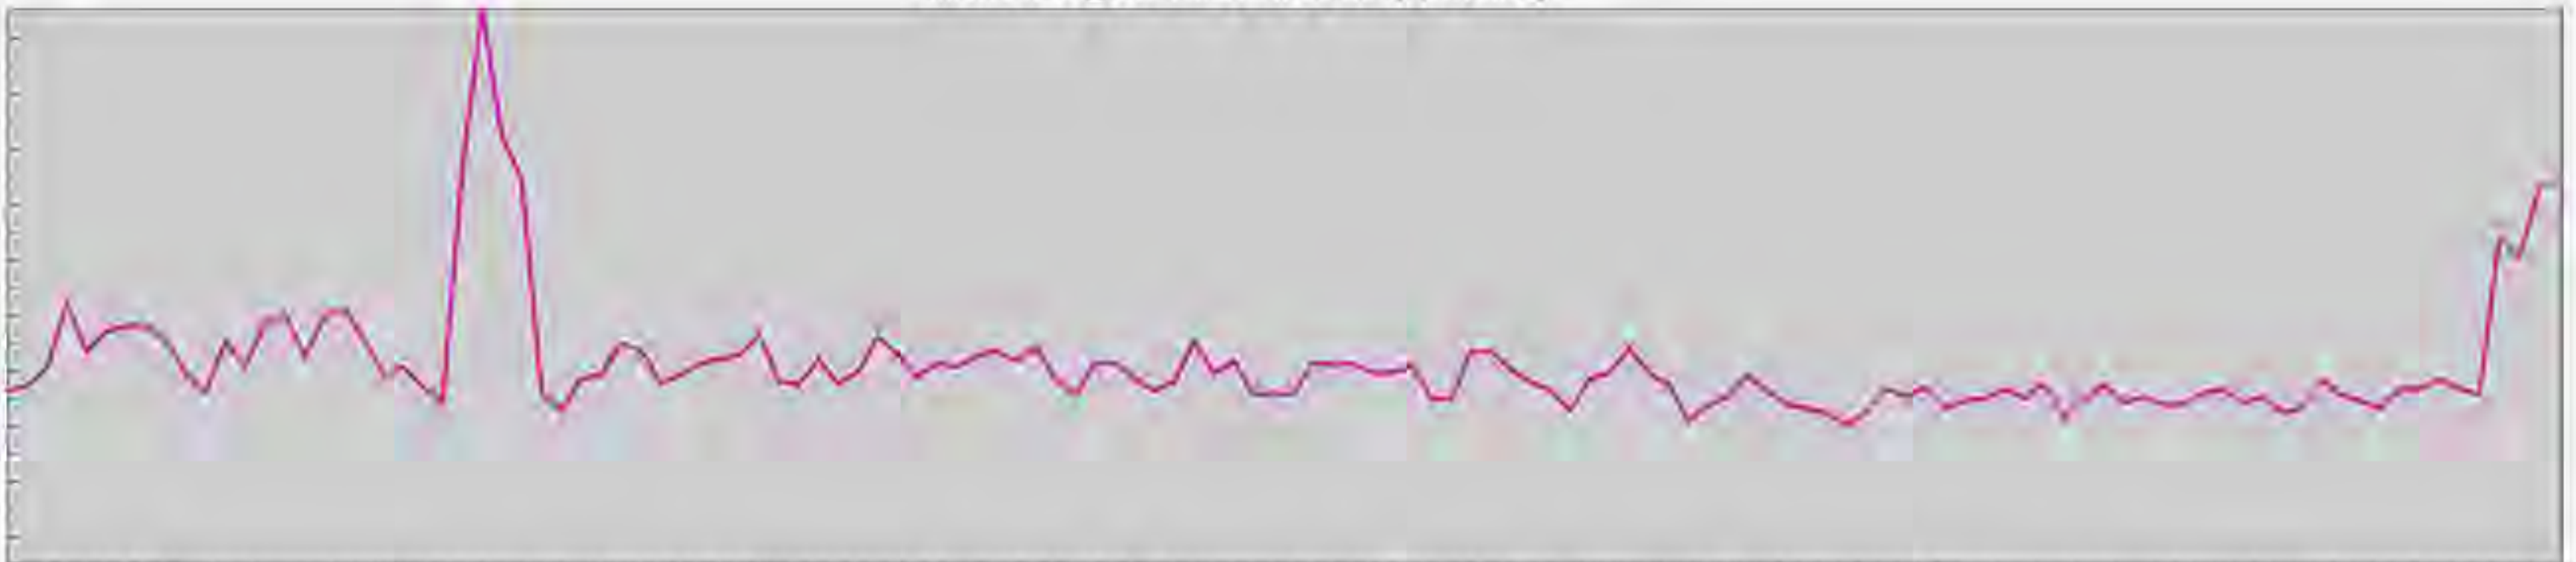

01-PP-M-cells\_GSM190789.CEL  
 02-PP-M-cells\_GSM190790.CEL  
 03-PP-M-cells\_GSM190791.CEL  
 04-CT-v-M-cells\_GSM190792.CEL  
 05-CT-v-M-cells\_GSM190793.CEL  
 06-CT-v-M-cells\_GSM190794.CEL  
 07-Ileum-IEC\_GSM190795.CEL  
 08-Ileum-IEC\_GSM190796.CEL  
 09-Ileum-IEC\_GSM190797.CEL  
 10-FAE-RMPYE001001.CEL  
 11-FAE-RMPYE002001.CEL  
 12-Small-intestine-epithelium\_RMINEP001001.CEL  
 13-Small-intestine-epithelium\_RMINEP002001.CEL  
 14-Ileum-IEC\_GSM350371.CEL  
 15-Ileum-IEC\_GSM350375.CEL  
 16-Colon-IEC-Gf\_GSM349880.CEL  
 17-Colon-VIII\_GSM480362.CEL  
 18-Colon-VIII\_GSM480363.CEL  
 19-Colon-VIII\_GSM480364.CEL  
 20-Colon-Crypt\_GSM480374.CEL  
 21-Colon-Crypt\_GSM480375.CEL  
 22-Paneth-cells\_GSM318590.CEL  
 23-Paneth-cells\_GSM318589.CEL  
 24-Paneth-cells\_GSM116350.CEL  
 25-Paneth-cells\_GSM116359.CEL  
 26-Paneth-cells-Gf-1\_GSM116357.CEL  
 27-Paneth-cells-Gf-1\_GSM116358.CEL  
 28-Bone marrow\_GSM258627.CEL  
 29-Bone marrow\_GSM258627.CEL  
 30-HSC\_GSM258770.CEL  
 31-HSC\_GSM258770.CEL  
 32-MEP\_GSM258770.CEL  
 33-MEP\_GSM258770.CEL  
 34-MEP\_GSM258770.CEL  
 35-GMP\_GSM258665.CEL  
 36-GMP\_GSM258665.CEL  
 37-GMP\_GSM258665.CEL  
 38-Granulocytes\_GSM258667.CEL  
 39-Granulocytes\_GSM258667.CEL  
 40-Mast-cells\_GSM258712.CEL  
 41-Mast-cells\_GSM258712.CEL  
 42-Mast-cells-Gf\_GSM258714.CEL  
 43-Mast-cells-Gf\_GSM258714.CEL  
 44-Mast-cells-IgE+Ad\_GSM258718.CEL  
 45-Mast-cells-IgE+Ad\_GSM258718.CEL  
 46-NK-cells\_GSM258732.CEL  
 47-NK-cells\_GSM258732.CEL  
 48-CD8a+DC\_GSM258645.CEL  
 49-CD8a+DC\_GSM258645.CEL  
 50-CD8a-DC\_GSM258647.CEL  
 51-CD8a-DC\_GSM258647.CEL  
 52-Plasmacytoid-DC\_GSM258650.CEL  
 53-Plasmacytoid-DC\_GSM258650.CEL  
 54-BMM-GSM258694.CEL  
 55-BMM-GSM258694.CEL  
 56-BMM-LPS-6h\_GSM258699.CEL  
 57-BMM-LPS-6h\_GSM258699.CEL  
 58-PMM-GSM258702.CEL  
 59-PMM-GSM258702.CEL  
 60-PMM-LPS-7h\_GSM258706.CEL  
 61-PMM-LPS-7h\_GSM258706.CEL  
 62-Microglia\_GSM258721.CEL  
 63-Microglia\_GSM258721.CEL  
 64-Osteoclasts\_GSM258743.CEL  
 65-Osteoclasts\_GSM258743.CEL  
 66-Thymocyte-DN\_GSM465595.CEL  
 67-T-cells-CD4+\_GSM258773.CEL  
 68-T-cells-CD4+\_GSM258773.CEL  
 69-T-cells-CD8+\_GSM258775.CEL  
 70-T-cells-CD8+\_GSM258775.CEL  
 71-Tregs\_GSM258778.CEL  
 72-Tregs\_GSM258778.CEL  
 73-BAF3\_GSM258619.CEL  
 74-BAF3\_GSM258620.CEL  
 75-MZ-Bcell\_GSM258622.CEL  
 76-MZ-Bcell\_GSM258622.CEL  
 77-Follicular-Bcells\_GSM258664.CEL  
 78-Follicular-Bcells\_GSM258664.CEL  
 79-FLY-RMLNDC002001.CEL  
 80-FLY-RMLNDC003001.CEL  
 81-PP-FDC\_GSM481978.CEL  
 82-PP-FDC\_GSM481978.CEL  
 83-PP-FDC\_GSM481978.CEL  
 84-Lymph-endo-cells\_GSM143704.CEL  
 85-MS-1\_GSM234692.CEL  
 86-LTcell\_GSM465596.CEL  
 87-Nat Helper cell\_GSM465593.CEL  
 88-Nat Helper cell\_GSM465594.CEL  
 89-Chondrocytes\_GSM266741.CEL  
 90-Chondrocytes\_GSM266741.CEL  
 91-Osteoblast-d5\_GSM258741.CEL  
 92-Osteoblast-d5\_GSM258742.CEL  
 93-Osteoblast-d14\_GSM258737.CEL  
 94-Osteoblast-d21\_GSM258738.CEL  
 95-Osteoblast-d21\_GSM258739.CEL  
 96-Osteoblast-d21\_GSM258739.CEL  
 97-10T12\_GSM258631.CEL  
 98-10T12\_GSM258631.CEL  
 99-3T3-L1\_GSM258609.CEL  
 100-3T3-L1\_GSM258610.CEL  
 101-NH3T3\_GSM258729.CEL  
 102-NH3T3\_GSM258729.CEL  
 103-C2C12\_GSM258629.CEL  
 104-C2C12\_GSM258630.CEL  
 105-Bruce4\_GSM258656.CEL  
 106-Bruce4\_GSM258656.CEL  
 107-MIMCD3\_GSM258723.CEL  
 108-MIMCD3\_GSM258723.CEL  
 109-mim6\_GSM258725.CEL  
 110-mim6\_GSM258725.CEL  
 111-Astrocytes\_GSM241898.CEL  
 112-Astrocytes\_GSM241898.CEL  
 113-Spleen\_GSM258767.CEL  
 114-Spleen\_GSM258767.CEL  
 115-Lymph-nodes\_GSM258691.CEL  
 116-Lymph-nodes\_GSM258691.CEL  
 117-Lymph-nodes\_GSM258691.CEL  
 118-Intestine-small\_GSM258677.CEL  
 119-Intestine-small\_GSM258677.CEL  
 120-Intestine-large\_GSM258678.CEL  
 121-Intestine-large\_GSM258678.CEL  
 122-Colon-d4\_GSM198101.CEL  
 123-Colon-d4\_GSM198101.CEL  
 124-Colon-d9\_GSM198103.CEL  
 125-Colon-d9\_GSM198103.CEL  
 126-Colon-d9\_GSM198104.CEL  
 127-NALT\_GSM289408.CEL  
 128-NALT\_GSM289409.CEL  
 129-NALT\_GSM289410.CEL  
 130-NALT\_GSM289411.CEL



Cluster0237\_House keeping (8 nodes)

925.8  
877.1  
828.4  
779.6  
730.9  
682.2  
633.4  
584.7  
536  
487.3  
438.5  
389.8  
341.1  
292.4  
243.6  
194.9  
146.2  
97.5  
48.7  
0

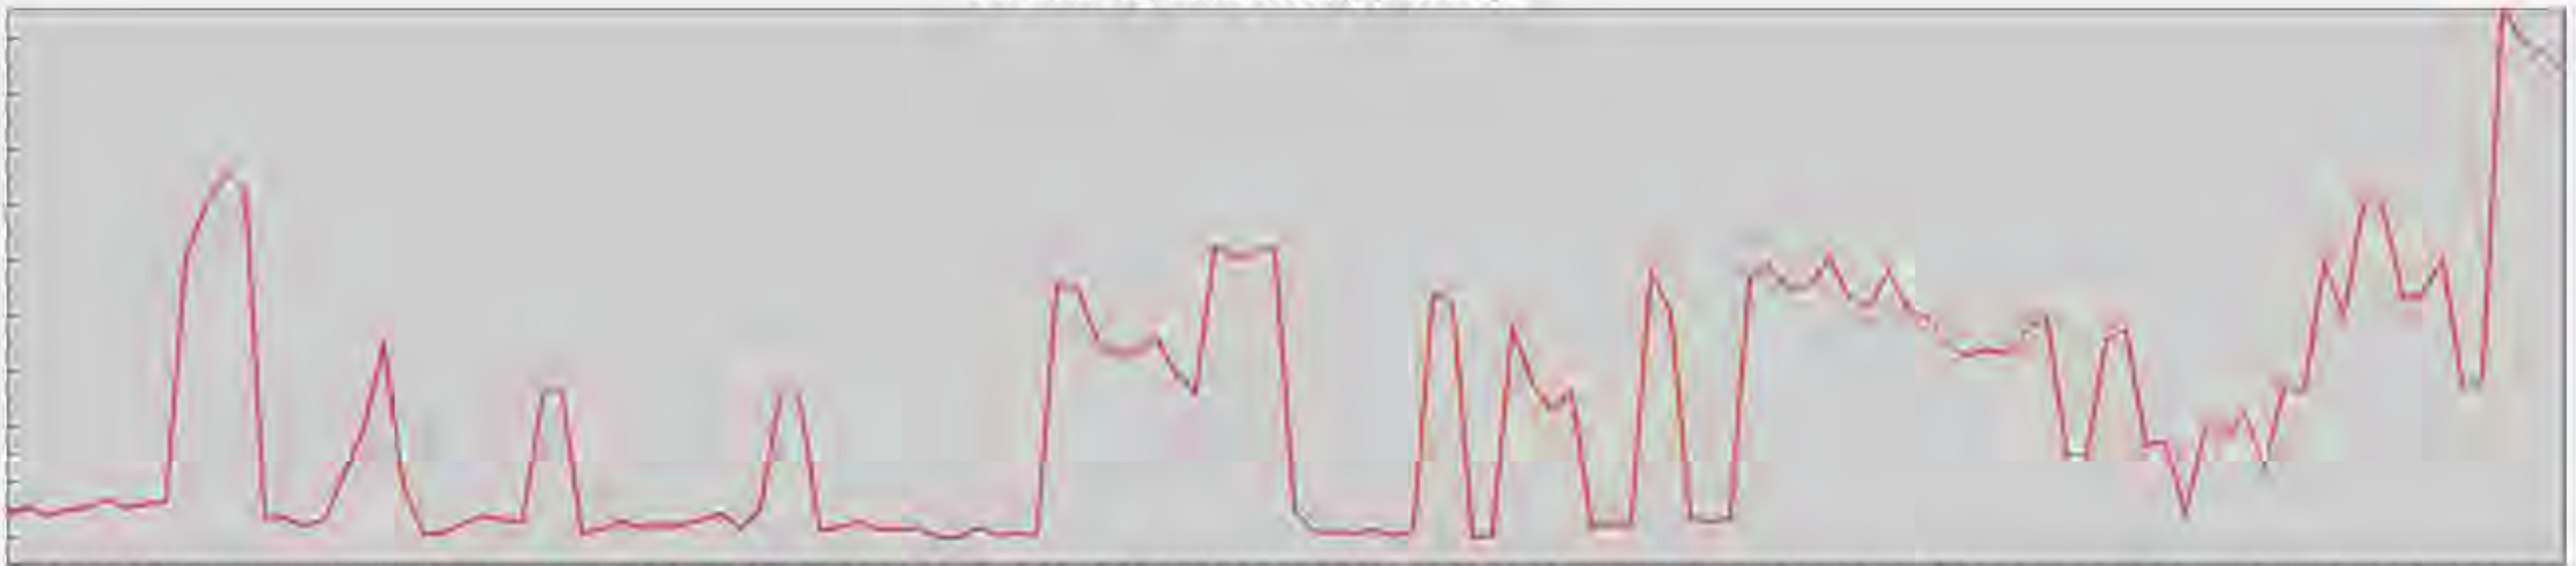

130-NALT GSM289411.CEL  
129-NALT GSM289410.CEL  
128-NALT GSM289409.CEL  
127-NALT GSM289408.CEL  
126-Colon-d9 GSM1988104.CEL  
125-Colon-d9 GSM1988103.CEL  
124-Colon-d9 GSM1988102.CEL  
123-Colon-d4 GSM1988101.CEL  
122-Colon-d4 GSM1988100.CEL  
121-Intestine-large GSM258676.CEL  
120-Intestine-large GSM258675.CEL  
119-Intestine-small GSM258678.CEL  
118-Intestine-small GSM258679.CEL  
117-Lymph-nodes GSM258691.CEL  
116-Lymph-nodes GSM258692.CEL  
115-Spleen GSM258766.CEL  
114-Spleen GSM258767.CEL  
113-Neuro2a GSM258728.CEL  
112-Neuro2a GSM258727.CEL  
111-Astrocytes GSM241898.CEL  
110-ming GSM258726.CEL  
109-ming GSM258725.CEL  
108-MIMCD3 GSM258724.CEL  
107-MIMCD3 GSM258723.CEL  
106-Bruce4 GSM258656.CEL  
105-Bruce4 GSM258655.CEL  
104-C2C12 GSM258690.CEL  
103-C2C12 GSM258689.CEL  
102-NH3T3 GSM258739.CEL  
101-NH3T3 GSM258738.CEL  
100-3T3-L1 GSM258610.CEL  
99-3T3-L1 GSM258609.CEL  
98-10T12 GSM258631.CEL  
97-10T12 GSM258632.CEL  
96-Osteoblast-d21 GSM258740.CEL  
95-Osteoblast-d21 GSM258739.CEL  
94-Osteoblast-d14 GSM258738.CEL  
93-Osteoblast-d14 GSM258737.CEL  
92-Osteoblast-d5 GSM258742.CEL  
91-Osteoblast-d5 GSM258741.CEL  
90-Chondrocytes GSM266741.CEL  
89-Chondrocytes GSM266740.CEL  
88-Nat Helper cell GSM465594.CEL  
87-Nat Helper cell GSM465593.CEL  
86-LT cell GSM465596.CEL  
85-MS-1 GSM234692.CEL  
84-Lymph-endo-cells GSM143704.CEL  
83-PP-FDC GSM481977.CEL  
82-PP-FDC GSM481978.CEL  
81-PP-FDC GSM481976.CEL  
80-FLY RMLNDCC003001.CEL  
79-FLY RMLNDCC003001.CEL  
78-Follicular-Bcells GSM258664.CEL  
77-Follicular-Bcells GSM258663.CEL  
76-MZ-Bcell GSM258622.CEL  
75-MZ-Bcell GSM258621.CEL  
74-BAF3 GSM258620.CEL  
73-BAF3 GSM258619.CEL  
72-Tregs GSM258778.CEL  
71-Tregs GSM258777.CEL  
70-T-cells-CD8+ GSM258776.CEL  
69-T-cells-CD8+ GSM258775.CEL  
68-T-cells-CD4+ GSM258774.CEL  
67-T-cells-CD4+ GSM258773.CEL  
66-Thymocyte-DN GSM465595.CEL  
65-Osteoclasts GSM258744.CEL  
64-Osteoclasts GSM258743.CEL  
63-Microglia GSM258721.CEL  
62-Microglia GSM258721.CEL  
61-PM-M-PS-7h GSM258706.CEL  
60-PM-M-PS-7h GSM258705.CEL  
59-PM-M-PS-7d GSM258702.CEL  
58-PM-M-PS-6h GSM258701.CEL  
57-BMM-LPS-6h GSM258699.CEL  
56-BMM-LPS-6h GSM258699.CEL  
55-BMM-LPS-6h GSM258699.CEL  
54-BMM-LPS-6h GSM258699.CEL  
53-Plasmacytoid-DC GSM258650.CEL  
52-Plasmacytoid-DC GSM258649.CEL  
51-CD8a-DC GSM258648.CEL  
50-CD8a-DC GSM258647.CEL  
49-CD8a+DC GSM258646.CEL  
48-CD8a+DC GSM258645.CEL  
47-NK-cells GSM258732.CEL  
46-NK-cells GSM258731.CEL  
45-Mast-cells-IgE+Ad GSM258718.CEL  
44-Mast-cells-IgE+Ad GSM258717.CEL  
43-Mast-cells-IgE GSM258714.CEL  
42-Mast-cells-IgE GSM258713.CEL  
41-Mast-cells GSM258712.CEL  
40-Granulocytes GSM258668.CEL  
39-Granulocytes GSM258667.CEL  
38-GMP GSM258666.CEL  
37-GMP GSM258665.CEL  
36-GMP GSM258664.CEL  
35-GMP GSM258642.CEL  
34-GMP GSM258641.CEL  
33-MEP GSM258720.CEL  
32-MEP GSM258719.CEL  
31-H9C GSM258770.CEL  
30-H9C GSM258769.CEL  
29-Bone marrow GSM258628.CEL  
28-Bone marrow GSM258627.CEL  
27-Paneth-cells-GF GSM116357.CEL  
26-Paneth-cells-GF-1 GSM116359.CEL  
25-Paneth-cells GSM116359.CEL  
24-Paneth-cells GSM116359.CEL  
23-Paneth-cells GSM318589.CEL  
22-Paneth-cells GSM318590.CEL  
21-Colon-Crypt GSM480375.CEL  
20-Colon-Crypt GSM480374.CEL  
19-Colon-Vill GSM480363.CEL  
18-Colon-Vill GSM480362.CEL  
17-Colon-IEC-GF GSM349880.CEL  
16-Colon-IEC-GF GSM350375.CEL  
15-Ileum-IEC-GF GSM350376.CEL  
14-Ileum-IEC-GF GSM350371.CEL  
13-Small-intestine-epithelium RMINEP002001.CEL  
12-Small-intestine-epithelium RMINEP001001.CEL  
11-FAE-RMPYEP002001.CEL  
10-FAE-RMPYEP001001.CEL  
09-Ileum-IEC GSM190797.CEL  
08-Ileum-IEC GSM190796.CEL  
07-Ileum-IEC GSM190795.CEL  
06-CT-v-M-cells GSM190794.CEL  
05-CT-v-M-cells GSM190793.CEL  
04-CT-v-M-cells GSM190792.CEL  
03-PP-M-cells GSM190791.CEL  
02-PP-M-cells GSM190790.CEL  
01-PP-M-cells GSM190789.CEL



Cluster0238\_High in B cells (8 nodes)

589  
558  
527  
496  
465  
434  
403  
372  
341  
310  
279  
248  
217  
186  
155  
124  
93  
62  
31  
0

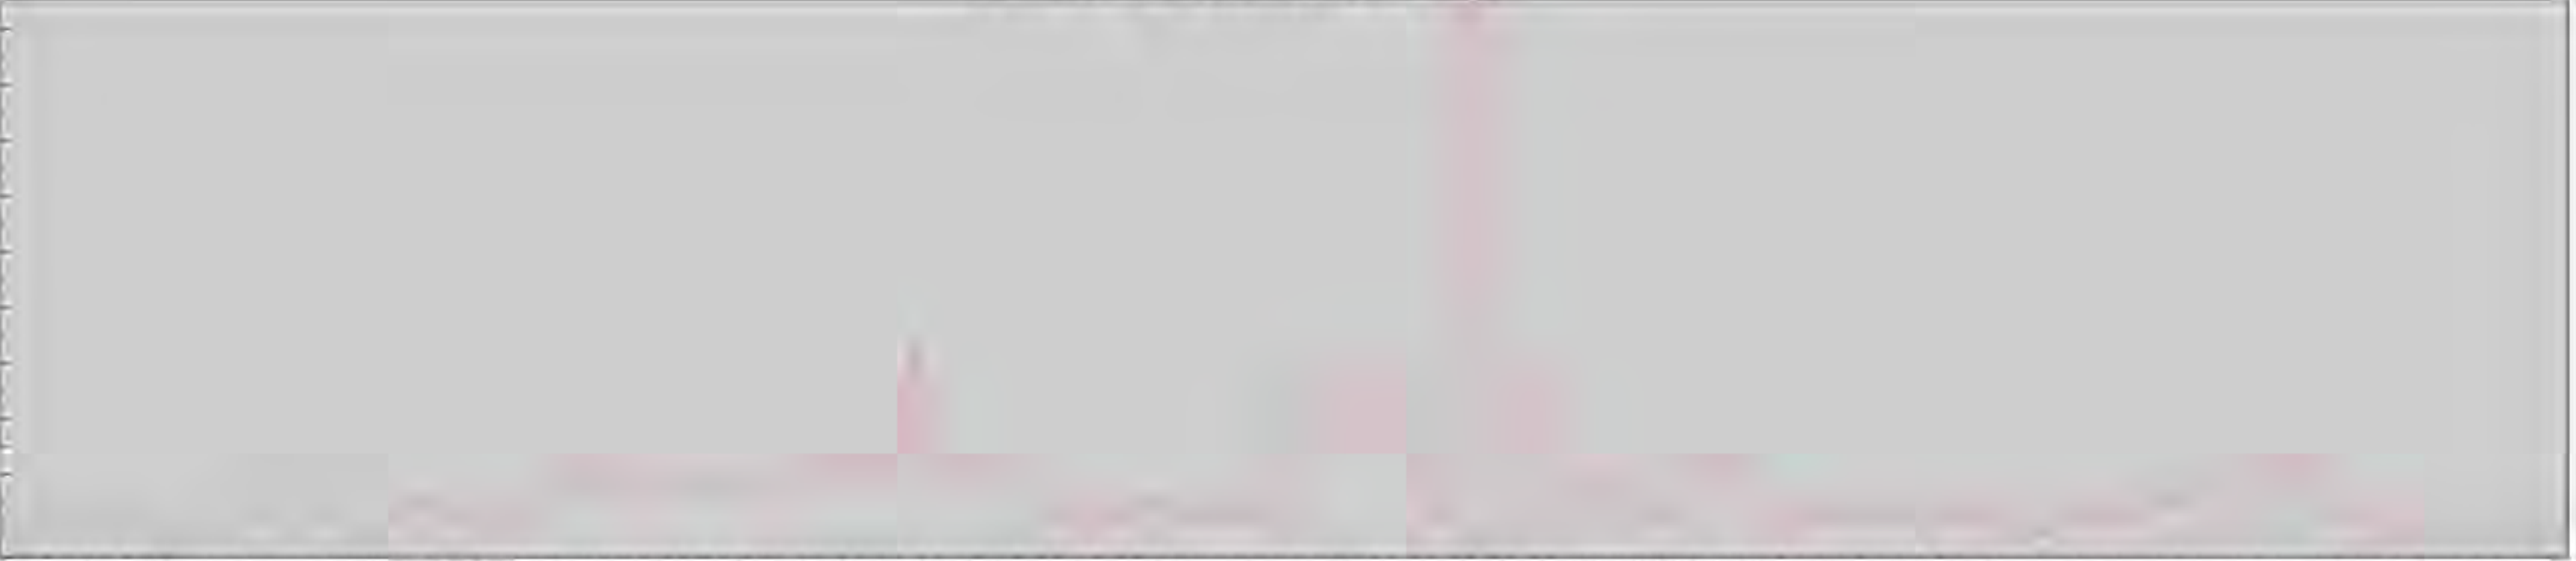

130- NALT GSM2899411 CELL  
 129- NALT GSM2899410 CELL  
 128- NALT GSM2899409 CELL  
 127- NALT GSM2899408 CELL  
 126- Colon-d9 GSM1988105 CELL  
 125- Colon-d9 GSM1988104 CELL  
 124- Colon-d9 GSM1988103 CELL  
 123- Colon-d4 GSM1988102 CELL  
 122- Colon-d4 GSM1988101 CELL  
 121- Intestine-large GSM258676 CELL  
 120- Intestine-large GSM258675 CELL  
 119- Intestine-small GSM258674 CELL  
 118- Intestine-small GSM258673 CELL  
 117- Lymph-nodes GSM258672 CELL  
 116- Lymph-nodes GSM258671 CELL  
 115- Spleen GSM258767 CELL  
 114- Spleen GSM258766 CELL  
 113- Neuro2a GSM258728 CELL  
 112- Neuro2a GSM258727 CELL  
 111- Astrocytes GSM241898 CELL  
 110- mimb GSM258726 CELL  
 109- mimb GSM258725 CELL  
 108- MIMCD3 GSM258724 CELL  
 107- MIMCD3 GSM258723 CELL  
 106- Bruce4 GSM258656 CELL  
 105- Bruce4 GSM258655 CELL  
 104- C2C12 GSM258690 CELL  
 103- C2C12 GSM258689 CELL  
 102- NIH3T3 GSM258730 CELL  
 101- NIH3T3 GSM258729 CELL  
 100- 3T3-L1 GSM258610 CELL  
 99- 3T3-L1 GSM258609 CELL  
 98- 10T1/2 GSM258632 CELL  
 97- 10T1/2 GSM258631 CELL  
 96- Osteoblast-d21 GSM258740 CELL  
 95- Osteoblast-d21 GSM258739 CELL  
 94- Osteoblast-d14 GSM258738 CELL  
 93- Osteoblast-d14 GSM258737 CELL  
 92- Osteoblast-d5 GSM258742 CELL  
 91- Osteoblast-d5 GSM258741 CELL  
 90- Chondrocytes GSM266741 CELL  
 89- Nat Helper cell GSM465594 CELL  
 88- Nat Helper cell GSM465593 CELL  
 87- T cell GSM465596 CELL  
 86- MS-1 GSM234692 CELL  
 85- Lymph-endo-cells GSM143704 CELL  
 84- P-FDC GSM481977 CELL  
 83- P-FDC GSM481978 CELL  
 82- P-FDC GSM481976 CELL  
 81- P-FDC GSM481975 CELL  
 80- E-L Y RMLNDCC003001 CELL  
 79- E-L Y RMLNDCC003001 CELL  
 78- Follicular-Bcells GSM258664 CELL  
 77- MZ-Bcell GSM258627 CELL  
 76- MZ-Bcell GSM258627 CELL  
 75- BAF3 GSM258620 CELL  
 74- BAF3 GSM258619 CELL  
 73- Tregs GSM258778 CELL  
 72- Tregs GSM258777 CELL  
 71- T-cells-CD8+ GSM258776 CELL  
 70- T-cells-CD8+ GSM258774 CELL  
 69- T-cells-CD4+ GSM258773 CELL  
 68- T-cells-CD4+ GSM258773 CELL  
 67- Thymocyte-DN GSM465595 CELL  
 66- Osteoclasts GSM258743 CELL  
 65- Microglia GSM258721 CELL  
 64- Microglia GSM258721 CELL  
 63- P-MM-LPS-7h GSM268706 CELL  
 62- P-MM-LPS-7h GSM268706 CELL  
 61- P-MM-LPS-7h GSM268705 CELL  
 60- P-MM-LPS-6h GSM258702 CELL  
 59- P-MM-LPS-6h GSM258701 CELL  
 58- P-MM-LPS-6h GSM258699 CELL  
 57- P-MM-LPS-6h GSM258699 CELL  
 56- P-MM-LPS-6h GSM258694 CELL  
 55- P-MM-LPS-6h GSM258694 CELL  
 54- P-MM-LPS-6h GSM258694 CELL  
 53- P-MM-LPS-6h GSM258694 CELL  
 52- P-MM-LPS-6h GSM258694 CELL  
 51- P-MM-LPS-6h GSM258694 CELL  
 50- P-MM-LPS-6h GSM258694 CELL  
 49- P-MM-LPS-6h GSM258694 CELL  
 48- P-MM-LPS-6h GSM258694 CELL  
 47- NK-cells GSM258732 CELL  
 46- NK-cells GSM258731 CELL  
 45- Mast-cells-IgE+Ad GSM258719 CELL  
 44- Mast-cells-IgE+Ad GSM258717 CELL  
 43- Mast-cells-IgE GSM258714 CELL  
 42- Mast-cells-IgE GSM258713 CELL  
 41- Mast-cells-IgE GSM258712 CELL  
 40- Mast-cells-IgE GSM258712 CELL  
 39- Granulocytes GSM258668 CELL  
 38- Granulocytes GSM258667 CELL  
 37- GMP GSM258666 CELL  
 36- GMP GSM258665 CELL  
 35- GMP GSM258665 CELL  
 34- GMP GSM258665 CELL  
 33- MIEP GSM258872 CELL  
 32- MIEP GSM258871 CELL  
 31- HESC GSM258770 CELL  
 30- HESC GSM258769 CELL  
 29- Bone marrow GSM258628 CELL  
 28- Bone marrow GSM258627 CELL  
 27- Paneth-cells-GF-1 GSM116357 CELL  
 26- Paneth-cells-GF-1 GSM116357 CELL  
 25- Paneth-cells GSM116350 CELL  
 24- Paneth-cells GSM116359 CELL  
 23- Paneth-cells GSM318589 CELL  
 22- Paneth-cells GSM318590 CELL  
 21- Paneth-cells GSM318590 CELL  
 20- Colon-Crypt GSM480374 CELL  
 19- Colon-Vill GSM480363 CELL  
 18- Colon-Vill GSM480362 CELL  
 17- Colon-IEC-GF GSM349880 CELL  
 16- Colon-IEC-GF GSM350375 CELL  
 15- Ileum-IEC-GF GSM350376 CELL  
 14- Ileum-IEC GSM350371 CELL  
 13- Small-intestine-epithelium RMINEP002901 CELL  
 12- Small-intestine-epithelium RMINEP001001 CELL  
 11- FAE RMPYEP002001 CELL  
 10- FAE RMPYEP001001 CELL  
 09- Ileum-IEC GSM190797 CELL  
 08- Ileum-IEC GSM190796 CELL  
 07- Ileum-IEC GSM190795 CELL  
 06- CT-w-M-cells GSM190794 CELL  
 05- CT-y-M-cells GSM190793 CELL  
 04- PP-M-cells GSM190792 CELL  
 03- PP-M-cells GSM190791 CELL  
 02- PP-M-cells GSM190790 CELL  
 01- PP-M-cells GSM190789 CELL



Cluster0239\_Uncertain-low in many (8 nodes)

93.9  
89  
84  
79.1  
74.2  
69.2  
64.3  
59.3  
54.4  
49.4  
44.5  
39.5  
34.6  
29.7  
24.7  
19.8  
14.8  
9.9  
4.9  
0

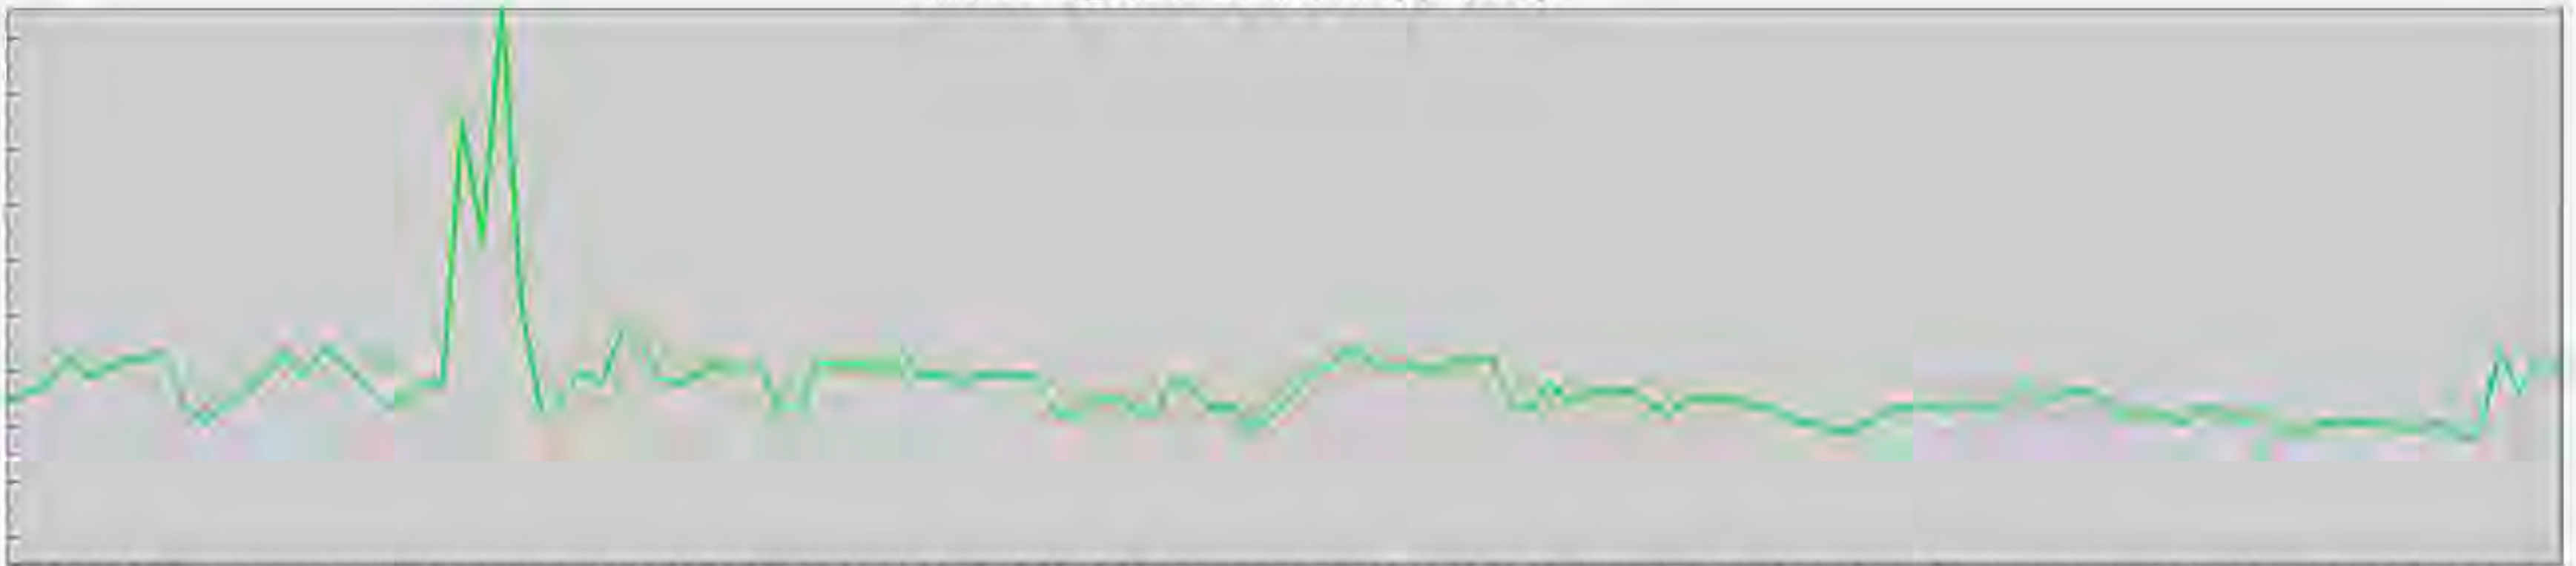

130-NALT-GSM289411.CEL  
129-NALT-GSM289410.CEL  
128-NALT-GSM289409.CEL  
127-NALT-GSM289408.CEL  
126-Colon-d9-GSM1988105.CEL  
125-Colon-d9-GSM1988104.CEL  
124-Colon-d9-GSM1988103.CEL  
123-Colon-d4-GSM1988102.CEL  
122-Colon-d4-GSM1988101.CEL  
121-Intestine-large-GSM258676.CEL  
120-Intestine-large-GSM258675.CEL  
119-Intestine-small-GSM258678.CEL  
118-Intestine-small-GSM258677.CEL  
117-Lymph-nodes-GSM258691.CEL  
116-Lymph-nodes-GSM258692.CEL  
115-Spleen-GSM258767.CEL  
114-Spleen-GSM258768.CEL  
113-Neuro2a-GSM258728.CEL  
112-Neuro2a-GSM258727.CEL  
111-Astrocytes-GSM241898.CEL  
110-mim6-GSM258726.CEL  
109-mim6-GSM258725.CEL  
108-MIMCD3-GSM258724.CEL  
107-MIMCD3-GSM258723.CEL  
106-Bruce4-GSM258656.CEL  
105-Bruce4-GSM258655.CEL  
104-C2C12-GSM258690.CEL  
103-C2C12-GSM258689.CEL  
102-NH3T3-GSM258739.CEL  
101-NH3T3-GSM258738.CEL  
100-3T3-L1-GSM258610.CEL  
99-3T3-L1-GSM258609.CEL  
98-10T12-GSM258632.CEL  
97-10T12-GSM258631.CEL  
96-Osteoblast-d21-GSM258740.CEL  
95-Osteoblast-d21-GSM258739.CEL  
94-Osteoblast-d14-GSM258738.CEL  
93-Osteoblast-d14-GSM258737.CEL  
92-Osteoblast-d5-GSM258742.CEL  
91-Osteoblast-d5-GSM258741.CEL  
90-Chondrocytes-GSM266741.CEL  
89-Chondrocytes-GSM266740.CEL  
88-Nat Helper cell-GSM465594.CEL  
87-Nat Helper cell-GSM465593.CEL  
86-LT cell-GSM465596.CEL  
85-MS-1-GSM234692.CEL  
84-Lymph-endo-cells-GSM143704.CEL  
83-PP-FDC-GSM481977.CEL  
82-PP-FDC-GSM481978.CEL  
81-PP-FDC-GSM481976.CEL  
80-LY-RMLNDCC003001.CEL  
79-LY-RMLNDCC003001.CEL  
78-Follicular-Bcells-GSM258664.CEL  
77-Follicular-Bcells-GSM258663.CEL  
76-MZ-Bcell-GSM258627.CEL  
75-MZ-Bcell-GSM258621.CEL  
74-BAF3-GSM258620.CEL  
73-BAF3-GSM258619.CEL  
72-Tregs-GSM258778.CEL  
71-Tregs-GSM258777.CEL  
70-T-cells-CD8+-GSM258776.CEL  
69-T-cells-CD8+-GSM258775.CEL  
68-T-cells-CD4+-GSM258774.CEL  
67-T-cells-CD4+-GSM258773.CEL  
66-Thymocyte-DN-GSM465595.CEL  
65-Osteoclasts-GSM258743.CEL  
64-Microglia-GSM258721.CEL  
63-Microglia-GSM258721.CEL  
62-MM-LPS-7h-GSM258706.CEL  
61-MM-LPS-7h-GSM258705.CEL  
60-MM-LPS-6h-GSM258702.CEL  
59-MM-LPS-6h-GSM258701.CEL  
58-MM-LPS-6h-GSM258699.CEL  
57-MM-LPS-6h-GSM258699.CEL  
56-MM-LPS-6h-GSM258694.CEL  
55-Plasmacytoid-DC-GSM258650.CEL  
54-Plasmacytoid-DC-GSM258649.CEL  
53-CD8a-DC-GSM258647.CEL  
52-CD8a-DC-GSM258647.CEL  
51-CD8a+DC-GSM258646.CEL  
50-CD8a+DC-GSM258645.CEL  
49-NK-cells-GSM258732.CEL  
48-NK-cells-GSM258731.CEL  
47-Mast-cells-IgE+Ad-GSM258718.CEL  
46-Mast-cells-IgE+Ad-GSM258717.CEL  
45-Mast-cells-IgE-GSM258714.CEL  
44-Mast-cells-IgE-GSM258713.CEL  
43-Mast-cells-IgE-GSM258712.CEL  
42-Mast-cells-IgE-GSM258711.CEL  
41-Mast-cells-GSM258711.CEL  
40-Granulocytes-GSM258668.CEL  
39-Granulocytes-GSM258667.CEL  
38-GMP-GSM258666.CEL  
37-GMP-GSM258665.CEL  
36-GMP-GSM258664.CEL  
35-GMP-GSM258642.CEL  
34-MEP-GSM258854.CEL  
33-MEP-GSM258854.CEL  
32-MEP-GSM258770.CEL  
31-HESC-GSM258770.CEL  
30-HESC-GSM258769.CEL  
29-Bone marrow-GSM2588628.CEL  
28-Bone marrow-GSM2588627.CEL  
27-Paneth-cells-GF-GSM116357.CEL  
26-Paneth-cells-GF-1-GSM116357.CEL  
25-Paneth-cells-GSM116350.CEL  
24-Paneth-cells-GSM116359.CEL  
23-Paneth-cells-GSM318589.CEL  
22-Paneth-cells-GSM318590.CEL  
21-Colon-Crypt-GSM480375.CEL  
20-Colon-Crypt-GSM480374.CEL  
19-Colon-Vill-GSM480363.CEL  
18-Colon-Vill-GSM480362.CEL  
17-Colon-IEC-GF-GSM349880.CEL  
16-Colon-IEC-GF-GSM350375.CEL  
15-Ileum-IEC-GF-GSM350376.CEL  
14-Ileum-IEC-GSM350371.CEL  
13-Small-intestine-epithelium-RMINEP002001.CEL  
12-Small-intestine-epithelium-RMINEP001001.CEL  
11-FAE-RMPYEP002001.CEL  
10-FAE-RMPYEP001001.CEL  
09-Ileum-IEC-GSM190797.CEL  
08-Ileum-IEC-GSM190796.CEL  
07-Ileum-IEC-GSM190795.CEL  
06-CT-v-M-cells-GSM190794.CEL  
05-CT-v-M-cells-GSM190793.CEL  
04-CT-v-M-cells-GSM190792.CEL  
03-PP-M-cells-GSM190791.CEL  
02-PP-M-cells-GSM190790.CEL  
01-PP-M-cells-GSM190789.CEL



Cluster0240\_Uncertain-low in many (8 nodes)

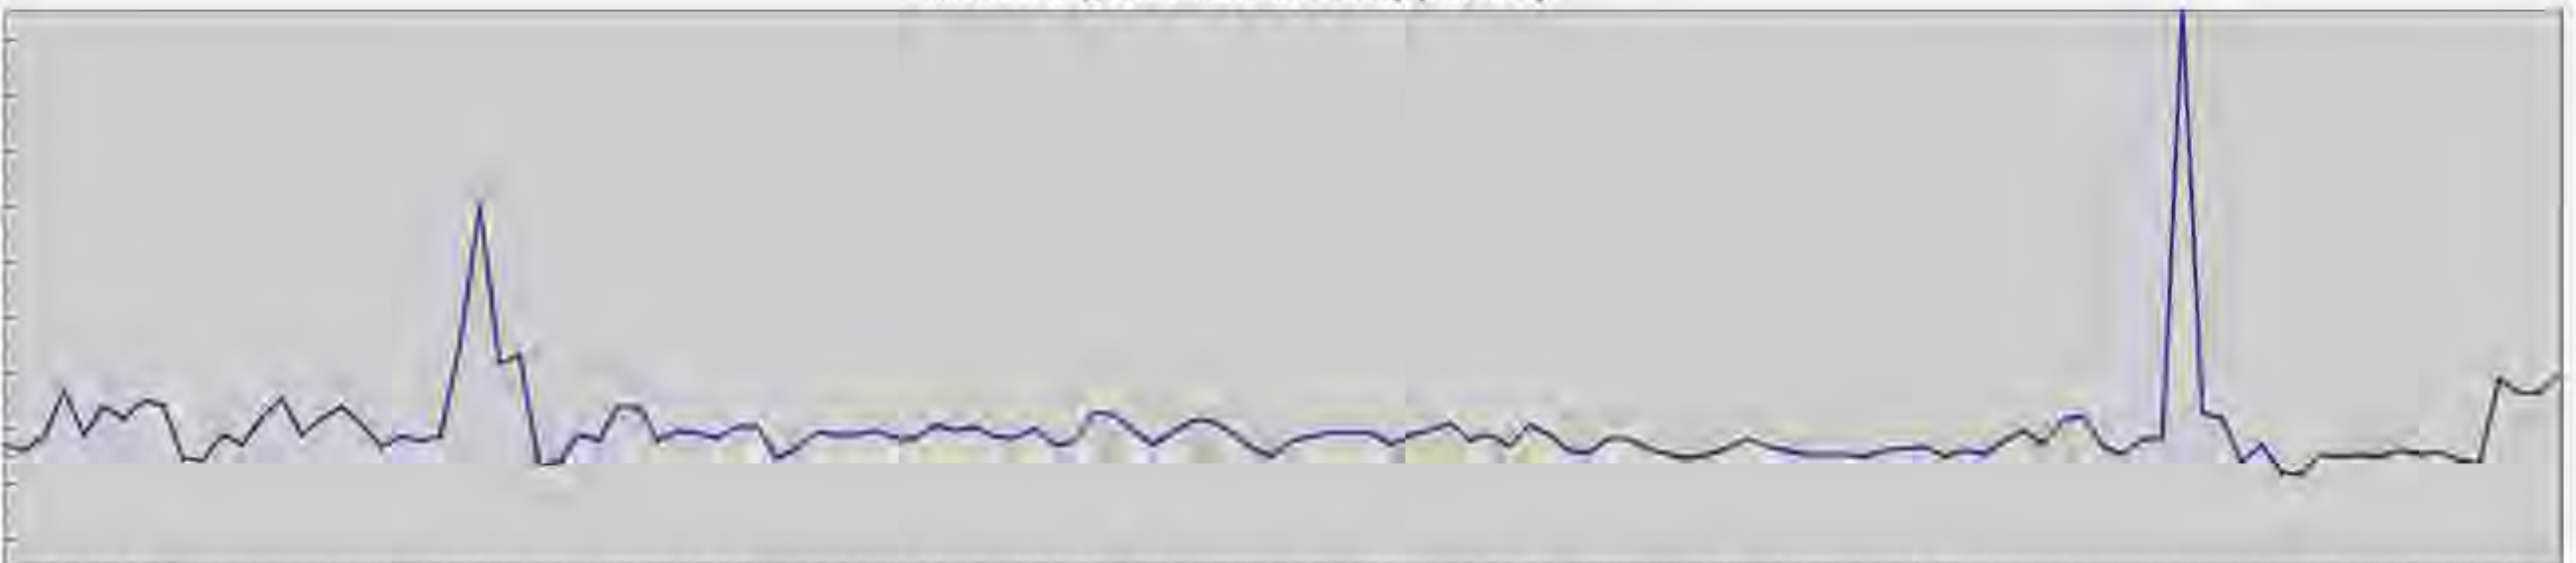

|                                                |                                                |
|------------------------------------------------|------------------------------------------------|
| 01-PP-M-cells_GSM190789.CEL                    | 130-NALT_GSM289411.CEL                         |
| 02-PP-M-cells_GSM190790.CEL                    | 129-NALT_GSM289410.CEL                         |
| 03-PP-M-cells_GSM190791.CEL                    | 128-NALT_GSM289409.CEL                         |
| 04-CT-V-M-cells_GSM190792.CEL                  | 127-NALT_GSM289408.CEL                         |
| 05-CT-V-M-cells_GSM190793.CEL                  | 126-Colon-d9-GSM1988105.CEL                    |
| 06-CT-V-M-cells_GSM190794.CEL                  | 125-Colon-d9-GSM1988104.CEL                    |
| 07-Ileum-EC_GSM190795.CEL                      | 124-Colon-d9-GSM1988103.CEL                    |
| 08-Ileum-EC_GSM190796.CEL                      | 123-Colon-d4-GSM1988102.CEL                    |
| 09-Ileum-EC_GSM190797.CEL                      | 122-Colon-d4-GSM1988101.CEL                    |
| 10-FAE-RMP-EP001001.CEL                        | 121-Intestine-large_GSM258676.CEL              |
| 11-FAE-RMP-EP002001.CEL                        | 120-Intestine-large_GSM258675.CEL              |
| 12-Small-intestine-epithelium_RMINEP001001.CEL | 119-Intestine-small_GSM258678.CEL              |
| 13-Small-intestine-epithelium_RMINEP002001.CEL | 118-Intestine-small_GSM258677.CEL              |
| 14-Ileum-EC_GSM350371.CEL                      | 117-Lymph-nodes_GSM258691.CEL                  |
| 15-Ileum-EC_GSM350375.CEL                      | 116-Lymph-nodes_GSM258690.CEL                  |
| 16-Colon-EC-Gf_GSM349880.CEL                   | 115-Spleen_GSM258767.CEL                       |
| 17-Colon-VIII-GSM480362.CEL                    | 114-Spleen_GSM258766.CEL                       |
| 18-Colon-VIII-GSM480363.CEL                    | 113-Neuro2a_GSM258728.CEL                      |
| 19-Colon-VIII-GSM480364.CEL                    | 112-Neuro2a_GSM258727.CEL                      |
| 20-Colon-Crypt_GSM480374.CEL                   | 111-Astrocytes_GSM241898.CEL                   |
| 21-Colon-Crypt_GSM480375.CEL                   | 110-mimb_GSM258726.CEL                         |
| 22-Paneth-cells-GSM318589.CEL                  | 109-mimb_GSM258725.CEL                         |
| 23-Paneth-cells-GSM318590.CEL                  | 108-MIMCD3_GSM258724.CEL                       |
| 24-Paneth-cells-GSM116350.CEL                  | 107-MIMCD3_GSM258723.CEL                       |
| 25-Paneth-cells-GSM116351.CEL                  | 106-Bruce4-GSM258656.CEL                       |
| 26-Paneth-cells-GSM116352.CEL                  | 105-Bruce4-GSM258655.CEL                       |
| 27-Paneth-cells-Gf-GSM116357.CEL               | 104-C2C12-GSM258690.CEL                        |
| 28-Paneth-cells-Gf-GSM116357.CEL               | 103-C2C12-GSM258689.CEL                        |
| 29-Bone marrow_GSM258627.CEL                   | 102-NH3T3-GSM258730.CEL                        |
| 30-HHSC-GSM258770.CEL                          | 101-NH3T3-GSM258729.CEL                        |
| 31-MEP-GSM258771.CEL                           | 100-3T3-L1_GSM258610.CEL                       |
| 32-MEP-GSM258772.CEL                           | 99-3T3-L1_GSM258609.CEL                        |
| 33-MEP-GSM258854.CEL                           | 98-10T12-GSM258632.CEL                         |
| 34-MEP-GSM258854.CEL                           | 97-10T12-GSM258631.CEL                         |
| 35-GMP-GSM258866.CEL                           | 96-Osteoblast-d21-GSM258740.CEL                |
| 36-GMP-GSM258866.CEL                           | 95-Osteoblast-d21-GSM258739.CEL                |
| 37-GMP-GSM258866.CEL                           | 94-Osteoblast-d14-GSM258738.CEL                |
| 38-Granulocytes_GSM258667.CEL                  | 93-Osteoblast-d14-GSM258737.CEL                |
| 39-Granulocytes_GSM258667.CEL                  | 92-Osteoblast-d5-GSM258742.CEL                 |
| 40-Mast-cells_GSM258712.CEL                    | 91-Osteoblast-d5-GSM258741.CEL                 |
| 41-Mast-cells-GSM258712.CEL                    | 90-Chondrocytes_GSM258674.CEL                  |
| 42-Mast-cells-GSM258713.CEL                    | 89-Nat Helper cell_GSM465594.CEL               |
| 43-Mast-cells-GSM258714.CEL                    | 88-Nat Helper cell_GSM465593.CEL               |
| 44-Mast-cells-IdE+Ad-GSM258719.CEL             | 87-LT cell_GSM465596.CEL                       |
| 45-Mast-cells-IdE+Ad-GSM258719.CEL             | 86-MS-1_GSM234692.CEL                          |
| 46-NK-cells_GSM258731.CEL                      | 85-Lymph-endo-cells_GSM143704.CEL              |
| 47-NK-cells_GSM258731.CEL                      | 84-Lymph-endo-cells_GSM143704.CEL              |
| 48-CD8a+DC_GSM258646.CEL                       | 83-PP-FDC_GSM481977.CEL                        |
| 49-CD8a+DC_GSM258646.CEL                       | 82-PP-FDC_GSM481978.CEL                        |
| 50-CD8a-DC_GSM258647.CEL                       | 81-PP-FDC_GSM481976.CEL                        |
| 51-CD8a-DC_GSM258647.CEL                       | 80-L-Y-RMLNDC002001.CEL                        |
| 52-Plasmacytoid-DC_GSM258649.CEL               | 79-L-Y-RMLNDC002001.CEL                        |
| 53-Plasmacytoid-DC_GSM258649.CEL               | 78-Follicular-B-cells_GSM258664.CEL            |
| 54-BMM-GSM258694.CEL                           | 77-Follicular-B-cells_GSM258664.CEL            |
| 55-BMM-GSM258694.CEL                           | 76-MZ-Bcell_GSM258622.CEL                      |
| 56-BMM-LPS-6h_GSM258699.CEL                    | 75-MZ-Bcell_GSM258621.CEL                      |
| 57-BMM-LPS-6h_GSM258700.CEL                    | 74-BAF3_GSM258620.CEL                          |
| 58-BMM-LPS-7h_GSM258702.CEL                    | 73-BAF3_GSM258619.CEL                          |
| 59-BMM-LPS-7h_GSM258705.CEL                    | 72-Tregs_GSM258778.CEL                         |
| 60-BMM-LPS-7h_GSM258705.CEL                    | 71-Tregs_GSM258778.CEL                         |
| 61-PP-7h_GSM258706.CEL                         | 70-T-cells-CD8+GSM258776.CEL                   |
| 62-Microglia_GSM258721.CEL                     | 69-T-cells-CD8+GSM258775.CEL                   |
| 63-Microglia_GSM258721.CEL                     | 68-T-cells-CD4+GSM258774.CEL                   |
| 64-Osteoclasts_GSM258743.CEL                   | 67-T-cells-CD4+GSM258773.CEL                   |
| 65-Osteoclasts_GSM258743.CEL                   | 66-Thymocyte-DN_GSM465595.CEL                  |
| 66-Thymocyte-DN_GSM465595.CEL                  | 65-Osteoclasts_GSM258744.CEL                   |
| 67-T-cells-CD4+GSM258773.CEL                   | 64-Osteoclasts_GSM258744.CEL                   |
| 68-T-cells-CD4+GSM258774.CEL                   | 63-Microglia_GSM258721.CEL                     |
| 69-T-cells-CD8+GSM258775.CEL                   | 62-Microglia_GSM258721.CEL                     |
| 70-T-cells-CD8+GSM258776.CEL                   | 61-PP-7h_GSM258706.CEL                         |
| 71-Tregs_GSM258778.CEL                         | 60-BMM-LPS-7h_GSM258705.CEL                    |
| 72-Tregs_GSM258778.CEL                         | 59-BMM-LPS-7h_GSM258702.CEL                    |
| 73-BAF3_GSM258619.CEL                          | 58-BMM-LPS-6h_GSM258699.CEL                    |
| 74-BAF3_GSM258620.CEL                          | 57-BMM-LPS-6h_GSM258699.CEL                    |
| 75-MZ-Bcell_GSM258621.CEL                      | 56-BMM-LPS-6h_GSM258699.CEL                    |
| 76-MZ-Bcell_GSM258622.CEL                      | 55-BMM-GSM258694.CEL                           |
| 77-Follicular-B-cells_GSM258664.CEL            | 54-BMM-GSM258694.CEL                           |
| 78-Follicular-B-cells_GSM258664.CEL            | 53-Plasmacytoid-DC_GSM258649.CEL               |
| 79-L-Y-RMLNDC002001.CEL                        | 52-Plasmacytoid-DC_GSM258649.CEL               |
| 80-L-Y-RMLNDC002001.CEL                        | 51-CD8a-DC_GSM258647.CEL                       |
| 81-PP-FDC_GSM481976.CEL                        | 50-CD8a-DC_GSM258647.CEL                       |
| 82-PP-FDC_GSM481978.CEL                        | 49-CD8a+DC_GSM258646.CEL                       |
| 83-PP-FDC_GSM481977.CEL                        | 48-CD8a+DC_GSM258646.CEL                       |
| 84-Lymph-endo-cells_GSM143704.CEL              | 47-NK-cells_GSM258731.CEL                      |
| 85-MS-1_GSM234692.CEL                          | 46-NK-cells_GSM258731.CEL                      |
| 86-LT cell_GSM465596.CEL                       | 45-Mast-cells-IdE+Ad_GSM258719.CEL             |
| 87-Nat Helper cell_GSM465593.CEL               | 44-Mast-cells-IdE+Ad_GSM258719.CEL             |
| 88-Nat Helper cell_GSM465594.CEL               | 43-Mast-cells-IdE+Ad_GSM258714.CEL             |
| 89-Chondrocytes_GSM258674.CEL                  | 42-Mast-cells-IdE+Ad_GSM258713.CEL             |
| 90-Chondrocytes_GSM258674.CEL                  | 41-Mast-cells-GSM258712.CEL                    |
| 91-Osteoblast-d5-GSM258741.CEL                 | 40-Mast-cells-GSM258712.CEL                    |
| 92-Osteoblast-d5-GSM258742.CEL                 | 39-Granulocytes_GSM258667.CEL                  |
| 93-Osteoblast-d14-GSM258737.CEL                | 38-Granulocytes_GSM258667.CEL                  |
| 94-Osteoblast-d14-GSM258738.CEL                | 37-GMP-GSM258866.CEL                           |
| 95-Osteoblast-d21-GSM258739.CEL                | 36-GMP-GSM258866.CEL                           |
| 96-Osteoblast-d21-GSM258740.CEL                | 35-GMP-GSM258866.CEL                           |
| 97-10T12-GSM258631.CEL                         | 34-MEP-GSM258854.CEL                           |
| 98-10T12-GSM258632.CEL                         | 33-MEP-GSM258854.CEL                           |
| 99-3T3-L1_GSM258609.CEL                        | 32-MEP-GSM258772.CEL                           |
| 100-3T3-L1_GSM258610.CEL                       | 31-MEP-GSM258771.CEL                           |
| 101-NH3T3-GSM258729.CEL                        | 30-HHSC-GSM258770.CEL                          |
| 102-NH3T3-GSM258730.CEL                        | 29-Bone marrow_GSM258627.CEL                   |
| 103-C2C12-GSM258689.CEL                        | 28-Paneth-cells-Gf-GSM116357.CEL               |
| 104-C2C12-GSM258690.CEL                        | 27-Paneth-cells-Gf-GSM116357.CEL               |
| 105-Bruce4-GSM258655.CEL                       | 26-Paneth-cells-GSM116350.CEL                  |
| 106-Bruce4-GSM258656.CEL                       | 25-Paneth-cells-GSM116350.CEL                  |
| 107-MIMCD3_GSM258723.CEL                       | 24-Paneth-cells-GSM116351.CEL                  |
| 108-MIMCD3_GSM258723.CEL                       | 23-Paneth-cells-GSM318589.CEL                  |
| 109-mimb_GSM258725.CEL                         | 22-Paneth-cells-GSM318590.CEL                  |
| 110-mimb_GSM258726.CEL                         | 21-Colon-Crypt_GSM480374.CEL                   |
| 111-Astrocytes_GSM241898.CEL                   | 20-Colon-Crypt_GSM480374.CEL                   |
| 112-Neuro2a_GSM258727.CEL                      | 19-Colon-VIII-GSM480362.CEL                    |
| 113-Neuro2a_GSM258728.CEL                      | 18-Colon-VIII-GSM480363.CEL                    |
| 114-Spleen_GSM258766.CEL                       | 17-Colon-EC-Gf_GSM349880.CEL                   |
| 115-Spleen_GSM258767.CEL                       | 16-Colon-EC-Gf_GSM349880.CEL                   |
| 116-Lymph-nodes_GSM258691.CEL                  | 15-Ileum-EC_GSM350375.CEL                      |
| 117-Lymph-nodes_GSM258690.CEL                  | 14-Ileum-EC_GSM350371.CEL                      |
| 118-Intestine-small_GSM258677.CEL              | 13-Small-intestine-epithelium_RMINEP002001.CEL |
| 119-Intestine-small_GSM258678.CEL              | 12-Small-intestine-epithelium_RMINEP001001.CEL |
| 120-Intestine-large_GSM258675.CEL              | 11-FAE-RMP-EP002001.CEL                        |
| 121-Intestine-large_GSM258676.CEL              | 10-FAE-RMP-EP001001.CEL                        |
| 122-Colon-d4-GSM1988101.CEL                    | 09-Ileum-EC_GSM190796.CEL                      |
| 123-Colon-d4-GSM1988102.CEL                    | 08-Ileum-EC_GSM190796.CEL                      |
| 124-Colon-d9-GSM1988103.CEL                    | 07-Ileum-EC_GSM190795.CEL                      |
| 125-Colon-d9-GSM1988104.CEL                    | 06-CT-V-M-cells_GSM190794.CEL                  |
| 126-Colon-d9-GSM1988105.CEL                    | 05-CT-V-M-cells_GSM190793.CEL                  |
| 127-NALT_GSM289408.CEL                         | 04-CT-V-M-cells_GSM190792.CEL                  |
| 128-NALT_GSM289409.CEL                         | 03-PP-M-cells_GSM190791.CEL                    |
| 129-NALT_GSM289410.CEL                         | 02-PP-M-cells_GSM190790.CEL                    |
| 130-NALT_GSM289411.CEL                         | 01-PP-M-cells_GSM190789.CEL                    |



Cluster0241\_Uncertain-low in many (8 nodes)

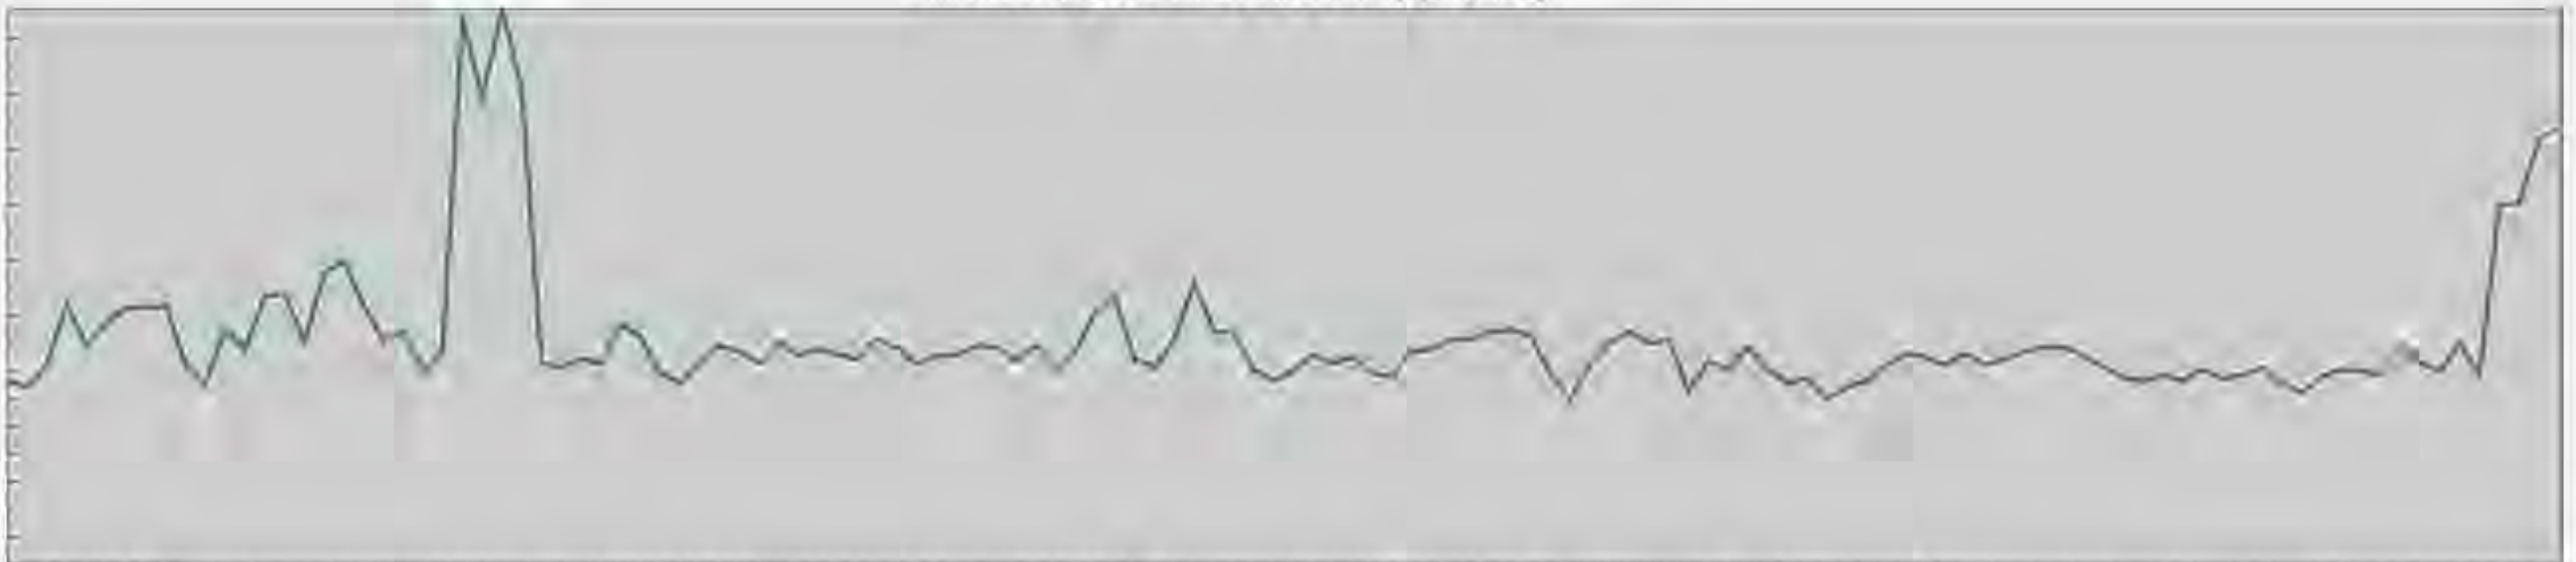

01-PP-M-cells\_GSM190789.CEL  
 02-PP-M-cells\_GSM190790.CEL  
 03-PP-M-cells\_GSM190791.CEL  
 04-CT-v-M-cells\_GSM190792.CEL  
 05-CT-v-M-cells\_GSM190793.CEL  
 06-CT-v-M-cells\_GSM190794.CEL  
 07-Ileum-IEC\_GSM190795.CEL  
 08-Ileum-IEC\_GSM190796.CEL  
 09-Ileum-IEC\_GSM190797.CEL  
 10-FAE-RMPyE\_P001001.CEL  
 11-FAE-RMPyE\_P002001.CEL  
 12-Small-intestine-epithelium\_RMINEP001001.CEL  
 13-Small-intestine-epithelium\_RMINEP002001.CEL  
 14-Ileum-IEC\_GSM350371.CEL  
 15-Ileum-IEC\_GSM350375.CEL  
 16-Colon-IEC-Gf\_GSM349880.CEL  
 17-Colon-VIII\_GSM480362.CEL  
 18-Colon-VIII\_GSM480363.CEL  
 19-Colon-VIII\_GSM480364.CEL  
 20-Colon-Crypt\_GSM480374.CEL  
 21-Colon-Crypt\_GSM480375.CEL  
 22-Paneth-cells\_GSM318589.CEL  
 23-Paneth-cells\_GSM318590.CEL  
 24-Paneth-cells\_GSM116359.CEL  
 25-Paneth-cells\_GSM116359.CEL  
 26-Paneth-cells-Gf-1\_GSM116357.CEL  
 27-Paneth-cells-Gf-1\_GSM116357.CEL  
 28-Paneth-cells-Gf-1\_GSM116357.CEL  
 29-Bone marrow\_GSM258627.CEL  
 30-HSC\_GSM258770.CEL  
 31-HSC\_GSM258770.CEL  
 32-MEP\_GSM258770.CEL  
 33-MEP\_GSM258770.CEL  
 34-MEP\_GSM258770.CEL  
 35-MEP\_GSM258770.CEL  
 36-MEP\_GSM258770.CEL  
 37-MEP\_GSM258770.CEL  
 38-Granulocytes\_GSM258667.CEL  
 39-Granulocytes\_GSM258667.CEL  
 40-Mast-cells\_GSM258712.CEL  
 41-Mast-cells\_GSM258712.CEL  
 42-Mast-cells-Gf\_GSM258713.CEL  
 43-Mast-cells-Gf\_GSM258713.CEL  
 44-Mast-cells-Gf+Ad\_GSM258718.CEL  
 45-Mast-cells-Gf+Ad\_GSM258718.CEL  
 46-NK-cells\_GSM258732.CEL  
 47-NK-cells\_GSM258732.CEL  
 48-CD8a+DC\_GSM258646.CEL  
 49-CD8a+DC\_GSM258646.CEL  
 50-CD8a-DC\_GSM258647.CEL  
 51-CD8a-DC\_GSM258647.CEL  
 52-Plasmacytoid-DC\_GSM258650.CEL  
 53-Plasmacytoid-DC\_GSM258650.CEL  
 54-BMM-GSM258694.CEL  
 55-BMM-GSM258694.CEL  
 56-BMM-LPS-6h\_GSM258699.CEL  
 57-BMM-LPS-6h\_GSM258699.CEL  
 58-PMM-LPS-7h\_GSM268702.CEL  
 59-PMM-LPS-7h\_GSM268702.CEL  
 60-PMM-LPS-7h\_GSM268706.CEL  
 61-PMM-LPS-7h\_GSM268706.CEL  
 62-Microglia\_GSM258721.CEL  
 63-Microglia\_GSM258721.CEL  
 64-Osteoclasts\_GSM258743.CEL  
 65-Osteoclasts\_GSM258743.CEL  
 66-Thymocyte-DN\_GSM465595.CEL  
 67-T-cells-CD4+\_GSM258773.CEL  
 68-T-cells-CD4+\_GSM258773.CEL  
 69-T-cells-CD8+\_GSM258776.CEL  
 70-T-cells-CD8+\_GSM258776.CEL  
 71-Tregs\_GSM258778.CEL  
 72-Tregs\_GSM258778.CEL  
 73-BAF3\_GSM258620.CEL  
 74-BAF3\_GSM258620.CEL  
 75-MZ-Bcell\_GSM258622.CEL  
 76-MZ-Bcell\_GSM258622.CEL  
 77-Follicular-Bcells\_GSM258664.CEL  
 78-Follicular-Bcells\_GSM258664.CEL  
 79-E-LY-RMLNDC002001.CEL  
 80-E-LY-RMLNDC003001.CEL  
 81-PP-FDC\_GSM481976.CEL  
 82-PP-FDC\_GSM481976.CEL  
 83-PP-FDC\_GSM481977.CEL  
 84-Lymph-endo-cells\_GSM143704.CEL  
 85-MS-1\_GSM234692.CEL  
 86-LTcell\_GSM465596.CEL  
 87-Nat Helper cell\_GSM465593.CEL  
 88-Nat Helper cell\_GSM465594.CEL  
 89-Chondrocytes\_GSM266741.CEL  
 90-Chondrocytes\_GSM266741.CEL  
 91-Osteoblast-d5\_GSM258742.CEL  
 92-Osteoblast-d5\_GSM258742.CEL  
 93-Osteoblast-d14\_GSM258737.CEL  
 94-Osteoblast-d14\_GSM258738.CEL  
 95-Osteoblast-d21\_GSM258740.CEL  
 96-Osteoblast-d21\_GSM258740.CEL  
 97-10T12\_GSM258632.CEL  
 98-10T12\_GSM258632.CEL  
 99-3T3-L1\_GSM258610.CEL  
 100-3T3-L1\_GSM258610.CEL  
 101-NH3T3\_GSM258739.CEL  
 102-NH3T3\_GSM258739.CEL  
 103-C2C12\_GSM258629.CEL  
 104-C2C12\_GSM258629.CEL  
 105-Bruce4\_GSM258690.CEL  
 106-Bruce4\_GSM258690.CEL  
 107-MIMCD3\_GSM258724.CEL  
 108-MIMCD3\_GSM258724.CEL  
 109-mim6\_GSM258725.CEL  
 110-mim6\_GSM258725.CEL  
 111-Astrocytes\_GSM241898.CEL  
 112-Astrocytes\_GSM241898.CEL  
 113-Spleen\_GSM258767.CEL  
 114-Spleen\_GSM258767.CEL  
 115-Spleen\_GSM258768.CEL  
 116-Lymph-nodes\_GSM258691.CEL  
 117-Lymph-nodes\_GSM258691.CEL  
 118-Intestine-small\_GSM258677.CEL  
 119-Intestine-small\_GSM258677.CEL  
 120-Intestine-large\_GSM258675.CEL  
 121-Intestine-large\_GSM258675.CEL  
 122-Colon-d4\_GSM198101.CEL  
 123-Colon-d4\_GSM198101.CEL  
 124-Colon-d9\_GSM198103.CEL  
 125-Colon-d9\_GSM198103.CEL  
 126-Colon-d9\_GSM198104.CEL  
 127-NALT\_GSM289408.CEL  
 128-NALT\_GSM289409.CEL  
 129-NALT\_GSM289410.CEL  
 130-NALT\_GSM289411.CEL



## Cluster0242\_Small intestine epithelium (8 nodes)

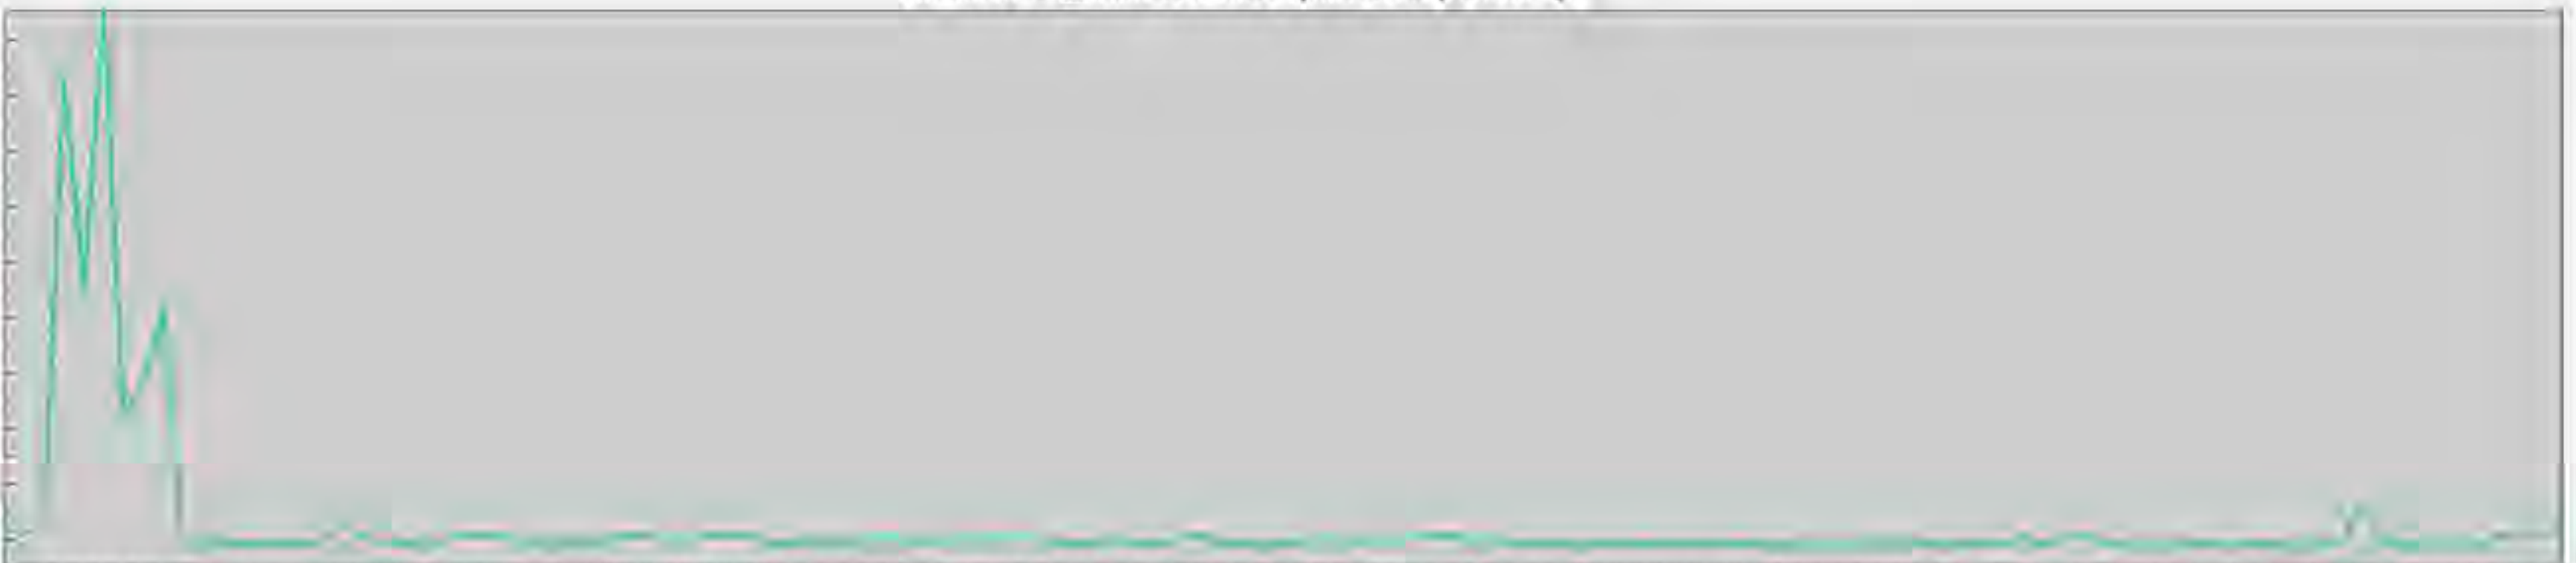

|                                            |      |
|--------------------------------------------|------|
| 01-PP-M-cells_GSM190789                    | CEL  |
| 02-PP-M-cells_GSM190790                    | CEL  |
| 03-PP-M-cells_GSM190791                    | CEL  |
| 04-CT-Y-M-cells_GSM190792                  | CEL  |
| 05-CT-Y-M-cells_GSM190793                  | CEL  |
| 06-CT-W-M-cells_GSM190794                  | CEL  |
| 07-Ileum-IEC_GSM190795                     | CEL  |
| 08-Ileum-IEC_GSM190796                     | CEL  |
| 09-Ileum-IEC_GSM190797                     | CEL  |
| 10-FAE-RMPYEP001001                        | CEL  |
| 11-FAE-RMPYEP002001                        | CEL  |
| 12-Small-intestine-epithelium_RMINEP001001 | CEL  |
| 13-Small-intestine-epithelium_RMINEP002001 | CEL  |
| 14-Ileum-IEC_GSM350371                     | CEL  |
| 15-Ileum-IEC_GSM350375                     | CEL  |
| 16-Color-VIII_GSM480362                    | cel  |
| 18-Color-VIII_GSM480363                    | cel  |
| 19-Color-VIII_GSM480364                    | cel  |
| 20-Color-Crypt_GSM480374                   | cel  |
| 21-Color-Crypt_GSM480375                   | cel  |
| 22-Paneth-cells_GSM318589                  | CEL  |
| 23-Paneth-cells_GSM318590                  | CEL  |
| 24-Paneth-cells_GSM116359                  | CEL  |
| 25-Paneth-cells_GSM116359                  | CEL  |
| 26-Paneth-cells_GSM116357                  | CEL  |
| 27-Paneth-cells-GE-1-GSM116357             | CEL  |
| 28-Bone-marrow_GSM258627                   | CEL  |
| 29-Bone-marrow_GSM258627                   | CEL  |
| 30-NALT_GSM289411                          | CELL |
| 31-NALT_GSM289410                          | CELL |
| 32-NALT_GSM289409                          | CELL |
| 33-NALT_GSM289408                          | CELL |
| 34-Color-d9_GSM198810                      | CELL |
| 35-Color-d9_GSM198810                      | CELL |
| 36-Color-d9_GSM198810                      | CELL |
| 37-Color-d9_GSM198810                      | CELL |
| 38-Color-d4_GSM198810                      | CELL |
| 39-Color-d4_GSM198810                      | CELL |
| 40-Intestine-large_GSM258675               | CEL  |
| 41-Intestine-large_GSM258675               | CEL  |
| 42-Intestine-small_GSM258677               | CEL  |
| 43-Intestine-small_GSM258677               | CEL  |
| 44-Spleen_GSM258678                        | CEL  |
| 45-Spleen_GSM258678                        | CEL  |
| 46-Neuro2a_GSM241898                       | CEL  |
| 47-Neuro2a_GSM241898                       | CEL  |
| 48-Astrocytes_GSM241898                    | CEL  |
| 49-mimb_GSM258725                          | CEL  |
| 50-mimb_GSM258725                          | CEL  |
| 51-MIMCD3_GSM258723                        | CEL  |
| 52-MIMCD3_GSM258723                        | CEL  |
| 53-Bruce4_GSM258690                        | CEL  |
| 54-Bruce4_GSM258690                        | CEL  |
| 55-C2C12_GSM258690                         | CEL  |
| 56-C2C12_GSM258690                         | CEL  |
| 57-NH3T3_GSM258730                         | CEL  |
| 58-NH3T3_GSM258730                         | CEL  |
| 59-3T3-L1_GSM258610                        | CEL  |
| 60-3T3-L1_GSM258610                        | CEL  |
| 61-10T12_GSM258631                         | CEL  |
| 62-10T12_GSM258631                         | CEL  |
| 63-Osteoblast-d21_GSM258740                | CEL  |
| 64-Osteoblast-d21_GSM258739                | CEL  |
| 65-Osteoblast-d14_GSM258738                | CEL  |
| 66-Osteoblast-d14_GSM258737                | CEL  |
| 67-Osteoblast-d5_GSM258742                 | CEL  |
| 68-Osteoblast-d5_GSM258741                 | CEL  |
| 69-Chondrocytes_GSM258674                  | CEL  |
| 70-Chondrocytes_GSM258674                  | CEL  |
| 71-Nat-Helper-cell_GSM465594               | CEL  |
| 72-Nat-Helper-cell_GSM465593               | CEL  |
| 73-LT-cell_GSM465596                       | CEL  |
| 74-MS-1_GSM234692                          | CEL  |
| 75-Lymph-endc-cells_GSM143704              | CEL  |
| 76-Lymph-endc-cells_GSM143704              | CEL  |
| 77-Lymph-endc-cells_GSM143704              | CEL  |
| 78-Lymph-endc-cells_GSM143704              | CEL  |
| 79-Follicular-B-cells_GSM258664            | CEL  |
| 80-Follicular-B-cells_GSM258664            | CEL  |
| 81-MZ-Bcell_GSM258627                      | CEL  |
| 82-MZ-Bcell_GSM258627                      | CEL  |
| 83-BAF3_GSM258620                          | CEL  |
| 84-BAF3_GSM258619                          | CEL  |
| 85-Tregs_GSM258778                         | CEL  |
| 86-Tregs_GSM258778                         | CEL  |
| 87-T-cells-CD8+GSM258776                   | CEL  |
| 88-T-cells-CD8+GSM258776                   | CEL  |
| 89-T-cells-CD8+GSM258774                   | CEL  |
| 90-T-cells-CD8+GSM258774                   | CEL  |
| 91-T-cells-CD4+GSM258773                   | CEL  |
| 92-T-cells-CD4+GSM258773                   | CEL  |
| 93-Thymocyte-DN_GSM465595                  | CEL  |
| 94-Thymocyte-DN_GSM465595                  | CEL  |
| 95-Osteoclasts_GSM258743                   | CEL  |
| 96-Osteoclasts_GSM258743                   | CEL  |
| 97-Microglia_GSM258721                     | CEL  |
| 98-Microglia_GSM258721                     | CEL  |
| 99-MM-LPS-7h_GSM258705                     | CEL  |
| 100-MM-LPS-7h_GSM258705                    | CEL  |
| 101-MM-LPS-6h_GSM258700                    | CEL  |
| 102-MM-LPS-6h_GSM258700                    | CEL  |
| 103-MM-LPS-6h_GSM258699                    | CEL  |
| 104-MM-LPS-6h_GSM258699                    | CEL  |
| 105-MM-LPS-6h_GSM258699                    | CEL  |
| 106-MM-LPS-6h_GSM258699                    | CEL  |
| 107-MM-LPS-6h_GSM258699                    | CEL  |
| 108-MM-LPS-6h_GSM258699                    | CEL  |
| 109-MM-LPS-6h_GSM258699                    | CEL  |
| 110-MM-LPS-6h_GSM258699                    | CEL  |
| 111-MM-LPS-6h_GSM258699                    | CEL  |
| 112-MM-LPS-6h_GSM258699                    | CEL  |
| 113-MM-LPS-6h_GSM258699                    | CEL  |
| 114-MM-LPS-6h_GSM258699                    | CEL  |
| 115-MM-LPS-6h_GSM258699                    | CEL  |
| 116-MM-LPS-6h_GSM258699                    | CEL  |
| 117-MM-LPS-6h_GSM258699                    | CEL  |
| 118-MM-LPS-6h_GSM258699                    | CEL  |
| 119-MM-LPS-6h_GSM258699                    | CEL  |
| 120-MM-LPS-6h_GSM258699                    | CEL  |
| 121-MM-LPS-6h_GSM258699                    | CEL  |
| 122-MM-LPS-6h_GSM258699                    | CEL  |
| 123-MM-LPS-6h_GSM258699                    | CEL  |
| 124-MM-LPS-6h_GSM258699                    | CEL  |
| 125-MM-LPS-6h_GSM258699                    | CEL  |
| 126-MM-LPS-6h_GSM258699                    | CEL  |
| 127-MM-LPS-6h_GSM258699                    | CEL  |
| 128-MM-LPS-6h_GSM258699                    | CEL  |
| 129-MM-LPS-6h_GSM258699                    | CEL  |
| 130-MM-LPS-6h_GSM258699                    | CEL  |
| 131-MM-LPS-6h_GSM258699                    | CEL  |
| 132-MM-LPS-6h_GSM258699                    | CEL  |
| 133-MM-LPS-6h_GSM258699                    | CEL  |
| 134-MM-LPS-6h_GSM258699                    | CEL  |
| 135-MM-LPS-6h_GSM258699                    | CEL  |
| 136-MM-LPS-6h_GSM258699                    | CEL  |
| 137-MM-LPS-6h_GSM258699                    | CEL  |
| 138-MM-LPS-6h_GSM258699                    | CEL  |
| 139-MM-LPS-6h_GSM258699                    | CEL  |
| 140-MM-LPS-6h_GSM258699                    | CEL  |
| 141-MM-LPS-6h_GSM258699                    | CEL  |
| 142-MM-LPS-6h_GSM258699                    | CEL  |
| 143-MM-LPS-6h_GSM258699                    | CEL  |
| 144-MM-LPS-6h_GSM258699                    | CEL  |
| 145-MM-LPS-6h_GSM258699                    | CEL  |
| 146-MM-LPS-6h_GSM258699                    | CEL  |
| 147-MM-LPS-6h_GSM258699                    | CEL  |
| 148-MM-LPS-6h_GSM258699                    | CEL  |
| 149-MM-LPS-6h_GSM258699                    | CEL  |
| 150-MM-LPS-6h_GSM258699                    | CEL  |
| 151-MM-LPS-6h_GSM258699                    | CEL  |
| 152-MM-LPS-6h_GSM258699                    | CEL  |
| 153-MM-LPS-6h_GSM258699                    | CEL  |
| 154-MM-LPS-6h_GSM258699                    | CEL  |
| 155-MM-LPS-6h_GSM258699                    | CEL  |
| 156-MM-LPS-6h_GSM258699                    | CEL  |
| 157-MM-LPS-6h_GSM258699                    | CEL  |
| 158-MM-LPS-6h_GSM258699                    | CEL  |
| 159-MM-LPS-6h_GSM258699                    | CEL  |
| 160-MM-LPS-6h_GSM258699                    | CEL  |
| 161-MM-LPS-6h_GSM258699                    | CEL  |
| 162-MM-LPS-6h_GSM258699                    | CEL  |
| 163-MM-LPS-6h_GSM258699                    | CEL  |
| 164-MM-LPS-6h_GSM258699                    | CEL  |
| 165-MM-LPS-6h_GSM258699                    | CEL  |
| 166-MM-LPS-6h_GSM258699                    | CEL  |
| 167-MM-LPS-6h_GSM258699                    | CEL  |
| 168-MM-LPS-6h_GSM258699                    | CEL  |
| 169-MM-LPS-6h_GSM258699                    | CEL  |
| 170-MM-LPS-6h_GSM258699                    | CEL  |
| 171-MM-LPS-6h_GSM258699                    | CEL  |
| 172-MM-LPS-6h_GSM258699                    | CEL  |
| 173-MM-LPS-6h_GSM258699                    | CEL  |
| 174-MM-LPS-6h_GSM258699                    | CEL  |
| 175-MM-LPS-6h_GSM258699                    | CEL  |
| 176-MM-LPS-6h_GSM258699                    | CEL  |
| 177-MM-LPS-6h_GSM258699                    | CEL  |
| 178-MM-LPS-6h_GSM258699                    | CEL  |
| 179-MM-LPS-6h_GSM258699                    | CEL  |
| 180-MM-LPS-6h_GSM258699                    | CEL  |
| 181-MM-LPS-6h_GSM258699                    | CEL  |
| 182-MM-LPS-6h_GSM258699                    | CEL  |
| 183-MM-LPS-6h_GSM258699                    | CEL  |
| 184-MM-LPS-6h_GSM258699                    | CEL  |
| 185-MM-LPS-6h_GSM258699                    | CEL  |
| 186-MM-LPS-6h_GSM258699                    | CEL  |
| 187-MM-LPS-6h_GSM258699                    | CEL  |
| 188-MM-LPS-6h_GSM258699                    | CEL  |
| 189-MM-LPS-6h_GSM258699                    | CEL  |
| 190-MM-LPS-6h_GSM258699                    | CEL  |
| 191-MM-LPS-6h_GSM258699                    | CEL  |
| 192-MM-LPS-6h_GSM258699                    | CEL  |
| 193-MM-LPS-6h_GSM258699                    | CEL  |
| 194-MM-LPS-6h_GSM258699                    | CEL  |
| 195-MM-LPS-6h_GSM258699                    | CEL  |
| 196-MM-LPS-6h_GSM258699                    | CEL  |
| 197-MM-LPS-6h_GSM258699                    | CEL  |
| 198-MM-LPS-6h_GSM258699                    | CEL  |
| 199-MM-LPS-6h_GSM258699                    | CEL  |
| 200-MM-LPS-6h_GSM258699                    | CEL  |



Cluster0243\_Phagocyte-related (8 nodes)

3,400.8  
3,221.8  
3,042.8  
2,863.8  
2,684.8  
2,505.8  
2,326.8  
2,147.8  
1,968.9  
1,789.9  
1,610.9  
1,431.9  
1,252.9  
1,073.9  
894.9  
715.9  
537  
358  
179  
0

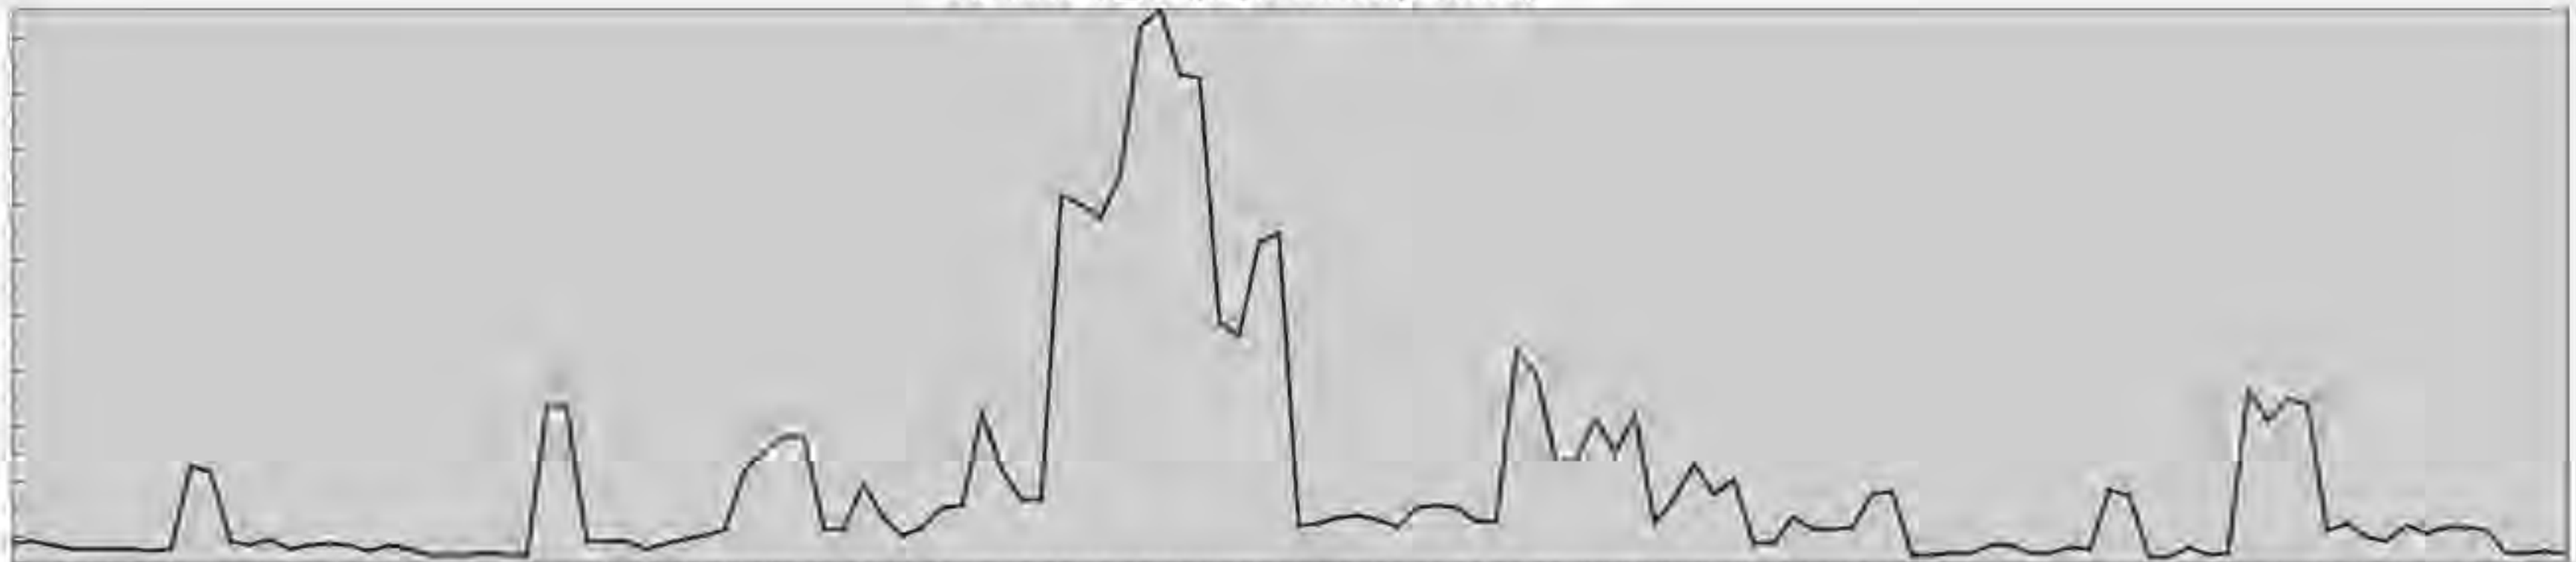

30- NALT GSM289411.CEL  
 128- NALT GSM289410.CEL  
 129- NALT GSM289409.CEL  
 127- NALT GSM289408.CEL  
 126- Colon-d9 GSM1988105.CEL  
 125- Colon-d9 GSM1988104.CEL  
 124- Colon-d9 GSM1988103.CEL  
 123- Colon-d4 GSM1988102.CEL  
 122- Colon-d4 GSM1988101.CEL  
 121- Intestine-large GSM258676.CEL  
 120- Intestine-large GSM258675.CEL  
 119- Intestine-small GSM258674.CEL  
 118- Intestine-small GSM258673.CEL  
 117- Lymph-nodes GSM258672.CEL  
 116- Spleen GSM258671.CEL  
 115- Spleen GSM258670.CEL  
 114- Neuro2a GSM258669.CEL  
 113- Neuro2a GSM258668.CEL  
 112- Astrocytes GSM241899.CEL  
 111- Astrocytes GSM241898.CEL  
 110- mimb GSM258726.CEL  
 109- mimb GSM258725.CEL  
 108- MIMCD3 GSM258724.CEL  
 107- MIMCD3 GSM258723.CEL  
 106- Bruce4 GSM258665.CEL  
 105- Bruce4 GSM258664.CEL  
 104- C2C12 GSM258663.CEL  
 103- C2C12 GSM258662.CEL  
 102- NIH3T3 GSM258739.CEL  
 101- NIH3T3 GSM258738.CEL  
 100- 3T3-L1 GSM258610.CEL  
 99- 3T3-L1 GSM258609.CEL  
 98- 10T1/2 GSM258632.CEL  
 97- 10T1/2 GSM258631.CEL  
 96- Osteoblast-d21 GSM258740.CEL  
 95- Osteoblast-d21 GSM258739.CEL  
 94- Osteoblast-d14 GSM258738.CEL  
 93- Osteoblast-d14 GSM258737.CEL  
 92- Osteoblast-d5 GSM258742.CEL  
 91- Osteoblast-d5 GSM258741.CEL  
 90- Chondrocytes GSM266741.CEL  
 89- Chondrocytes GSM266740.CEL  
 88- Nat Helper cell GSM465594.CEL  
 87- Nat Helper cell GSM465593.CEL  
 86- T cell GSM465596.CEL  
 85- MS-1 GSM234692.CEL  
 84- Lymph-endo-cells GSM143704.CEL  
 83- PFDc GSM481977.CEL  
 82- PFDc GSM481978.CEL  
 81- PFDc GSM481976.CEL  
 80- FLY RMLNDc003001.CEL  
 79- FLY RMLNDc003001.CEL  
 78- Follicular-Bcells GSM258664.CEL  
 77- Follicular-Bcells GSM258663.CEL  
 76- MZ-Bcell GSM258622.CEL  
 75- MZ-Bcell GSM258621.CEL  
 74- BAF3 GSM258620.CEL  
 73- BAF3 GSM258619.CEL  
 72- Tregs GSM258778.CEL  
 71- Tregs GSM258777.CEL  
 70- T-cells-CD8+ GSM258776.CEL  
 69- T-cells-CD8+ GSM258775.CEL  
 68- T-cells-CD4+ GSM258774.CEL  
 67- T-cells-CD4+ GSM258773.CEL  
 66- Thymocyte-DN GSM465595.CEL  
 65- Osteoclasts GSM258744.CEL  
 64- Microglia GSM258721.CEL  
 63- Microglia GSM258721.CEL  
 62- PMS-7h GSM258706.CEL  
 61- PMS-7h GSM258706.CEL  
 60- PMS-6h GSM258702.CEL  
 59- PMS-6h GSM258701.CEL  
 58- BMM-LPS-6h GSM258699.CEL  
 57- BMM-LPS-6h GSM258699.CEL  
 56- BMM-LPS-6h GSM258694.CEL  
 55- BMM-LPS-6h GSM258694.CEL  
 54- BMM-LPS-6h GSM258694.CEL  
 53- BMM-LPS-6h GSM258694.CEL  
 52- BMM-LPS-6h GSM258694.CEL  
 51- BMM-LPS-6h GSM258694.CEL  
 50- CD8a-DC GSM258647.CEL  
 49- CD8a-DC GSM258647.CEL  
 48- CD8a+DC GSM258646.CEL  
 47- NK-cells GSM258732.CEL  
 46- NK-cells GSM258731.CEL  
 45- Mast-cells-IgE+Ad GSM258719.CEL  
 44- Mast-cells-IgE+Ad GSM258718.CEL  
 43- Mast-cells-IgE GSM258714.CEL  
 42- Mast-cells-IgE GSM258713.CEL  
 41- Mast-cells GSM258712.CEL  
 40- Mast-cells GSM258712.CEL  
 39- Granulocytes GSM258667.CEL  
 38- Granulocytes GSM258667.CEL  
 37- GMP GSM258666.CEL  
 36- GMP GSM258666.CEL  
 35- GMP GSM258666.CEL  
 34- GMP GSM258666.CEL  
 33- MUEP GSM258672.CEL  
 32- MUEP GSM258672.CEL  
 31- HESC GSM258770.CEL  
 30- HESC GSM258770.CEL  
 29- Bone marrow GSM258628.CEL  
 28- Bone marrow GSM258627.CEL  
 27- Paneth-cells-GE GSM116357.CEL  
 26- Paneth-cells-GE GSM116357.CEL  
 25- Paneth-cells GSM116350.CEL  
 24- Paneth-cells GSM116359.CEL  
 23- Paneth-cells GSM318589.CEL  
 22- Paneth-cells GSM318590.CEL  
 21- Colon-Crypt GSM480375.CEL  
 20- Colon-Crypt GSM480374.CEL  
 19- Colon-Vill GSM480363.CEL  
 18- Colon-Vill GSM480362.CEL  
 17- Colon-IEC-GE GSM349880.CEL  
 16- Colon-IEC-GE GSM350375.CEL  
 15- Ileum-IEC-GE GSM350376.CEL  
 14- Ileum-IEC GSM350371.CEL  
 13- Small-intestine-epithelium RMINEP002901.CEL  
 12- Small-intestine-epithelium RMINEP001001.CEL  
 11- FAE-RMPYEP001001.CEL  
 10- FAE-RMPYEP001001.CEL  
 09- Ileum-IEC GSM190797.CEL  
 08- Ileum-IEC GSM190796.CEL  
 07- Ileum-IEC GSM190795.CEL  
 06- CT-v-M-cells GSM190794.CEL  
 05- CT-v-M-cells GSM190793.CEL  
 04- CT-y-M-cells GSM190792.CEL  
 03- PP-M-cells GSM190791.CEL  
 02- PP-M-cells GSM190790.CEL  
 01- PP-M-cells GSM190789.CEL



Cluster0244\_Uncertain-low in many (8 nodes)

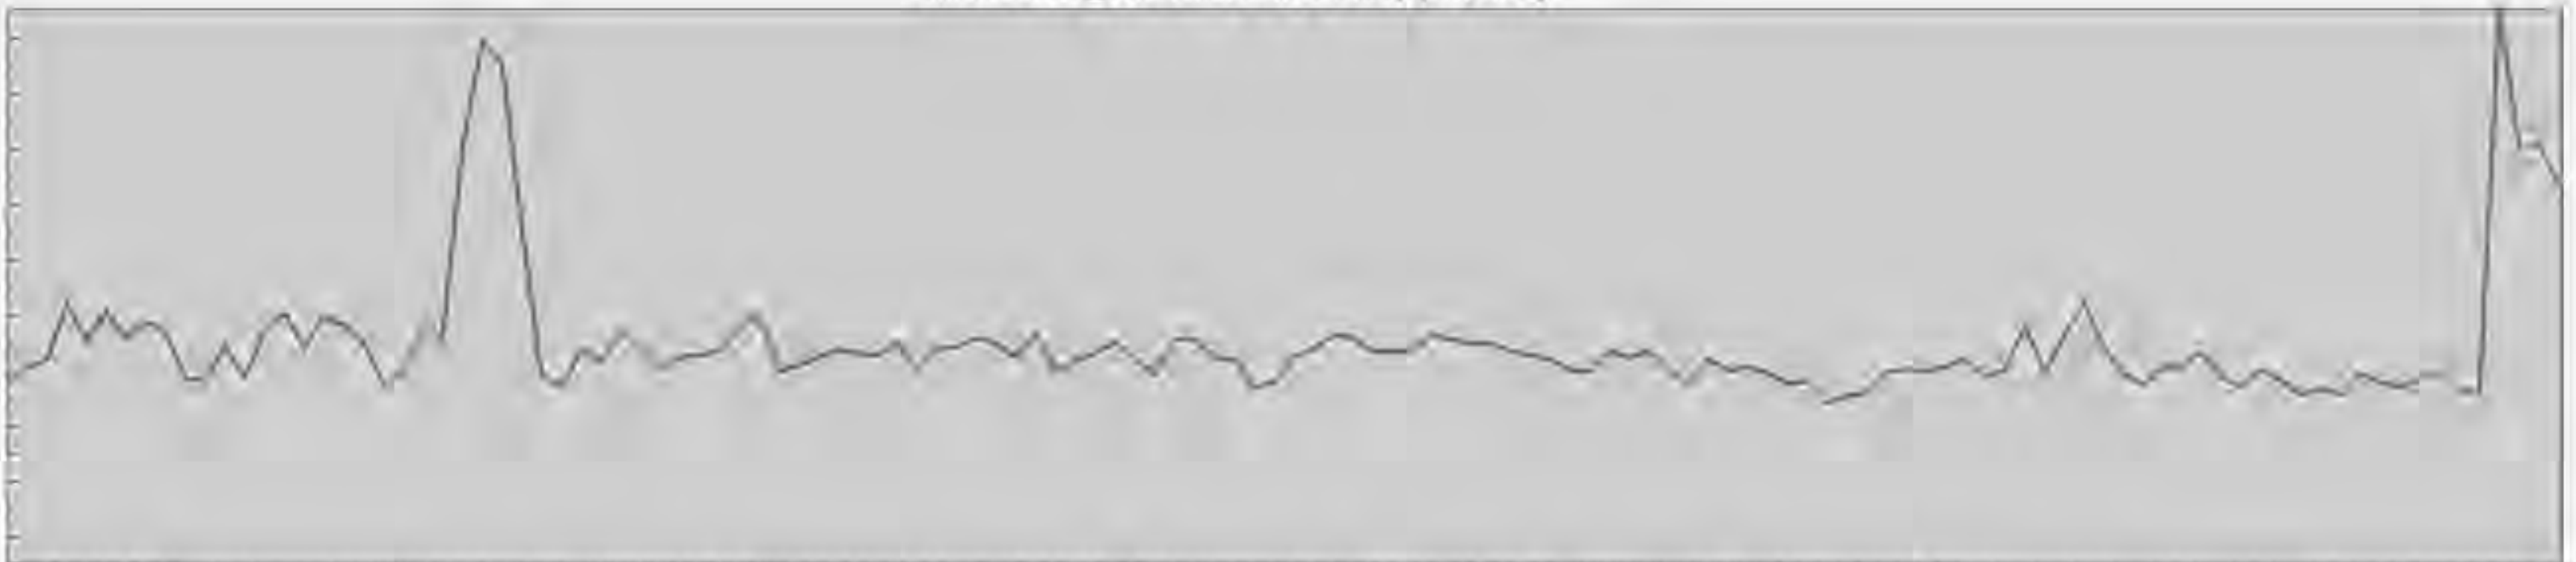

01-PP-M-cells\_GSM190789.CEL  
 02-PP-M-cells\_GSM190790.CEL  
 03-PP-M-cells\_GSM190791.CEL  
 04-CT-y-M-cells\_GSM190792.CEL  
 05-CT-y-M-cells\_GSM190793.CEL  
 06-CT-w-M-cells\_GSM190794.CEL  
 07-Ileum-IEC\_GSM190795.CEL  
 08-Ileum-IEC\_GSM190796.CEL  
 09-Ileum-IEC\_GSM190797.CEL  
 10-FAE-RMPyE001001.CEL  
 11-FAE-RMPyE002001.CEL  
 12-Small-intestine-epithelium\_RMINEP001001.CEL  
 13-Small-intestine-epithelium\_RMINEP002001.CEL  
 14-Ileum-IEC\_GSM350371.CEL  
 15-Ileum-IEC\_GSM350375.CEL  
 16-Colon-IEC-Gf\_GSM349880.CEL  
 17-Colon-IEC-Gf\_GSM350375.CEL  
 18-Colon-Vill-GSM480362.CEL  
 19-Colon-Vill-GSM480363.CEL  
 20-Colon-Crypt-GSM480374.CEL  
 21-Colon-Crypt-GSM480375.CEL  
 22-Paneth-cells\_GSM318589.CEL  
 23-Paneth-cells\_GSM318590.CEL  
 24-Paneth-cells\_GSM116359.CEL  
 25-Paneth-cells\_GSM116359.CEL  
 26-Paneth-cells-Gf-1-GSM116357.CEL  
 27-Paneth-cells-Gf-1-GSM116357.CEL  
 28-Paneth-cells-Gf-1-GSM116357.CEL  
 29-Bone marrow\_GSM258627.CEL  
 30-HSC\_GSM258770.CEL  
 31-HSC\_GSM258770.CEL  
 32-MEP\_GSM258770.CEL  
 33-MEP\_GSM258770.CEL  
 34-MEP\_GSM258770.CEL  
 35-MEP\_GSM258770.CEL  
 36-MEP\_GSM258770.CEL  
 37-MEP\_GSM258770.CEL  
 38-MEP\_GSM258770.CEL  
 39-Granulocytes\_GSM258667.CEL  
 40-Mast-cells\_GSM258771.CEL  
 41-Mast-cells\_GSM258771.CEL  
 42-Mast-cells-IdU-GSM258771.CEL  
 43-Mast-cells-IdU-GSM258771.CEL  
 44-Mast-cells-IdU+Ad-GSM258719.CEL  
 45-Mast-cells-IdU+Ad-GSM258719.CEL  
 46-NK-cells\_GSM258732.CEL  
 47-NK-cells\_GSM258732.CEL  
 48-CD8a+DC\_GSM258646.CEL  
 49-CD8a+DC\_GSM258646.CEL  
 50-CD8a-DC\_GSM258647.CEL  
 51-CD8a-DC\_GSM258647.CEL  
 52-Plasmacytoid-DC\_GSM258649.CEL  
 53-Plasmacytoid-DC\_GSM258649.CEL  
 54-BMM-GSM258694.CEL  
 55-BMM-GSM258694.CEL  
 56-BMM-LPS-6h-GSM258700.CEL  
 57-BMM-LPS-6h-GSM258700.CEL  
 58-BMM-LPS-7h-GSM258702.CEL  
 59-BMM-LPS-7h-GSM258702.CEL  
 60-BMM-LPS-7h-GSM258706.CEL  
 61-BMM-LPS-7h-GSM258706.CEL  
 62-Microglia\_GSM258721.CEL  
 63-Microglia\_GSM258721.CEL  
 64-Osteoclasts\_GSM258743.CEL  
 65-Osteoclasts\_GSM258743.CEL  
 66-Thymocyte-DN\_GSM465595.CEL  
 67-T-cells-CD4+GSM258773.CEL  
 68-T-cells-CD8+GSM258776.CEL  
 69-T-cells-CD8+GSM258776.CEL  
 70-T-cells-CD8+GSM258774.CEL  
 71-T-cells-CD8+GSM258774.CEL  
 72-Tregs\_GSM258778.CEL  
 73-Tregs\_GSM258778.CEL  
 74-BAF3\_GSM258620.CEL  
 75-BAF3\_GSM258620.CEL  
 76-MZ-Bcell\_GSM258622.CEL  
 77-Follicular-Bcells\_GSM258653.CEL  
 78-Follicular-Bcells\_GSM258653.CEL  
 79-E-L-Y-RMLNDC002001.CEL  
 80-E-L-Y-RMLNDC003001.CEL  
 81-PP-FDC\_GSM481976.CEL  
 82-PP-FDC\_GSM481976.CEL  
 83-PP-FDC\_GSM481977.CEL  
 84-Lymph-endo-cells\_GSM143704.CEL  
 85-MS-1\_GSM234692.CEL  
 86-LT-cell\_GSM465596.CEL  
 87-Nat Helper cell\_GSM465593.CEL  
 88-Nat Helper cell\_GSM465594.CEL  
 89-Chondrocytes\_GSM258741.CEL  
 90-Chondrocytes\_GSM258741.CEL  
 91-Osteoblast-d5\_GSM258742.CEL  
 92-Osteoblast-d5\_GSM258742.CEL  
 93-Osteoblast-d14\_GSM258737.CEL  
 94-Osteoblast-d14\_GSM258738.CEL  
 95-Osteoblast-d21\_GSM258739.CEL  
 96-Osteoblast-d21\_GSM258739.CEL  
 97-10T12\_GSM258631.CEL  
 98-10T12\_GSM258631.CEL  
 99-3T3-L1\_GSM258609.CEL  
 100-3T3-L1\_GSM258610.CEL  
 101-NH3T3\_GSM258729.CEL  
 102-NH3T3\_GSM258730.CEL  
 103-C2C12\_GSM258629.CEL  
 104-C2C12\_GSM258630.CEL  
 105-Bruce4\_GSM258656.CEL  
 106-Bruce4\_GSM258656.CEL  
 107-MIMCD3\_GSM258723.CEL  
 108-MIMCD3\_GSM258723.CEL  
 109-mim6\_GSM258725.CEL  
 110-mim6\_GSM258725.CEL  
 111-Astrocytes\_GSM241898.CEL  
 112-Astrocytes\_GSM241898.CEL  
 113-Spleen\_GSM258767.CEL  
 114-Spleen\_GSM258767.CEL  
 115-Spleen\_GSM258767.CEL  
 116-Lymph-nodes\_GSM258691.CEL  
 117-Lymph-nodes\_GSM258691.CEL  
 118-Intestine-small\_GSM258677.CEL  
 119-Intestine-small\_GSM258677.CEL  
 120-Intestine-large\_GSM258675.CEL  
 121-Intestine-large\_GSM258675.CEL  
 122-Colon-d4-GSM198810.CEL  
 123-Colon-d4-GSM198810.CEL  
 124-Colon-d9-GSM198810.CEL  
 125-Colon-d9-GSM198810.CEL  
 126-NALT\_GSM289408.CEL  
 127-NALT\_GSM289408.CEL  
 128-NALT\_GSM289409.CEL  
 129-NALT\_GSM289410.CEL  
 130-NALT\_GSM289411.CEL



Cluster0245\_Intestine-related (8 nodes)

2,969.3  
2,813  
2,656.7  
2,500.5  
2,344.2  
2,187.9  
2,031.6  
1,875.3  
1,719.1  
1,562.8  
1,406.5  
1,250.2  
1,094  
937.7  
781.4  
625.1  
468.8  
312.6  
156.3  
0

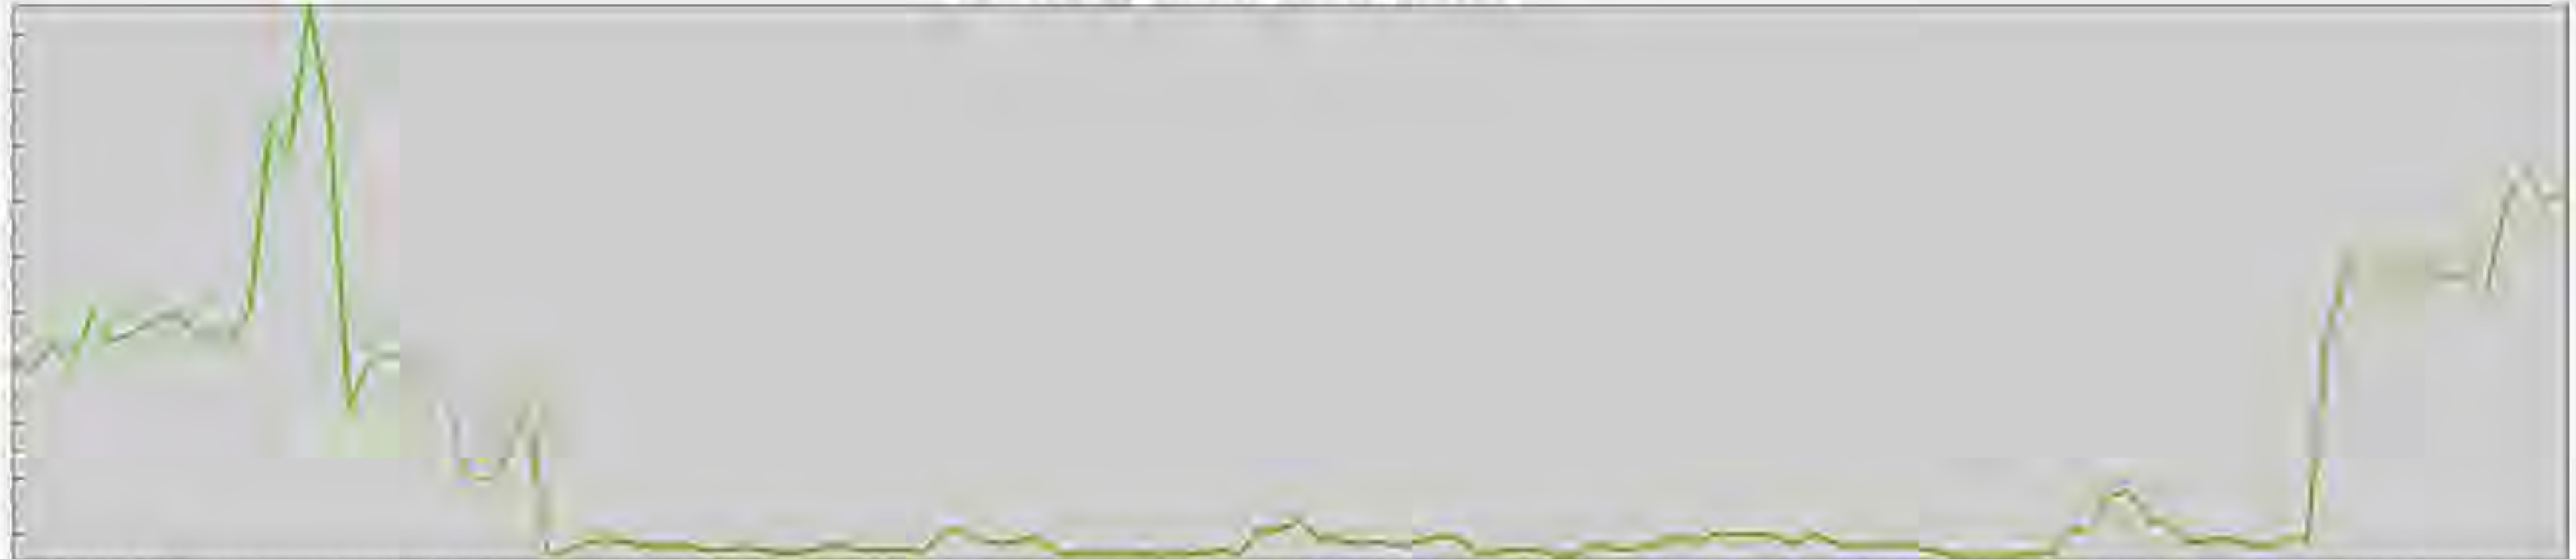

130-NALT GSM289411.CEL  
129-NALT GSM289410.CEL  
128-NALT GSM289409.CEL  
127-NALT GSM289408.CEL  
126-Column-d9 GSM1988105.CEL  
125-Column-d9 GSM1988104.CEL  
124-Column-d9 GSM1988103.CEL  
123-Column-d4 GSM1988102.CEL  
122-Column-d4 GSM1988101.CEL  
121-Intestine-large GSM258676.CEL  
120-Intestine-large GSM258675.CEL  
119-Intestine-small GSM258674.CEL  
118-Intestine-small GSM258673.CEL  
117-Lymph-nodes GSM258672.CEL  
116-Lymph-nodes GSM258671.CEL  
115-Spleen GSM258767.CEL  
114-Spleen GSM258766.CEL  
113-Neuro2a GSM258728.CEL  
112-Neuro2a GSM258727.CEL  
111-Astrocytes GSM241898.CEL  
110-mim6 GSM258726.CEL  
109-mim6 GSM258725.CEL  
108-MIMCD3 GSM258724.CEL  
107-MIMCD3 GSM258723.CEL  
106-Bruce4 GSM258665.CEL  
105-Bruce4 GSM258664.CEL  
104-C2C12 GSM258690.CEL  
103-C2C12 GSM258689.CEL  
102-NH3T3 GSM258739.CEL  
101-NH3T3 GSM258738.CEL  
100-3T3-L1 GSM258610.CEL  
99-3T3-L1 GSM258609.CEL  
98-10T12 GSM258632.CEL  
97-10T12 GSM258631.CEL  
96-Osteoblast-d21 GSM258740.CEL  
95-Osteoblast-d21 GSM258739.CEL  
94-Osteoblast-d14 GSM258738.CEL  
93-Osteoblast-d14 GSM258737.CEL  
92-Osteoblast-d5 GSM258742.CEL  
91-Osteoblast-d5 GSM258741.CEL  
90-Chondrocytes GSM266741.CEL  
89-Chondrocytes GSM266740.CEL  
88-Nat Helper cell GSM465594.CEL  
87-Nat Helper cell GSM465593.CEL  
86-TT cell GSM465596.CEL  
85-MS-1 GSM234692.CEL  
84-Lymph-endo-cells GSM143704.CEL  
83-PP-FDC GSM481977.CEL  
82-PP-FDC GSM481978.CEL  
81-PP-FDC GSM481976.CEL  
80-D-F-L-Y RMLNDC003001.CEL  
79-F-L-Y RMLNDC003001.CEL  
78-Follicular-Bcells GSM258664.CEL  
77-Follicular-Bcells GSM258663.CEL  
76-MZ-Bcell GSM258622.CEL  
75-MZ-Bcell GSM258621.CEL  
74-BAF3 GSM258620.CEL  
73-BAF3 GSM258619.CEL  
72-Tregs GSM258778.CEL  
71-Tregs GSM258777.CEL  
70-T-cells-CD8+ GSM258776.CEL  
69-T-cells-CD8+ GSM258775.CEL  
68-T-cells-CD4+ GSM258774.CEL  
67-T-cells-CD4+ GSM258773.CEL  
66-Thymocyte-DN GSM465595.CEL  
65-Osteoclasts GSM258743.CEL  
64-Osteoclasts GSM258744.CEL  
63-Microglia GSM258721.CEL  
62-Microglia GSM258721.CEL  
61-PM-M-PS-7h GSM268706.CEL  
60-PM-M-PS-7h GSM268705.CEL  
59-PM-M-PS-6h GSM258702.CEL  
58-PM-M-PS-6h GSM258701.CEL  
57-BMM-LPS-6h GSM258699.CEL  
56-BMM-LPS-6h GSM258699.CEL  
55-BMM-LPS-6h GSM258699.CEL  
54-BMM-LPS-6h GSM258699.CEL  
53-Plasmacytoid-DC GSM258650.CEL  
52-Plasmacytoid-DC GSM258649.CEL  
51-CD8a-DC GSM258648.CEL  
50-CD8a-DC GSM258647.CEL  
49-CD8a+DC GSM258646.CEL  
48-CD8a+DC GSM258645.CEL  
47-NK-cells GSM258732.CEL  
46-NK-cells GSM258731.CEL  
45-Mast-cells-IgE+Ad GSM258718.CEL  
44-Mast-cells-IgE+Ad GSM258717.CEL  
43-Mast-cells-IgE GSM258714.CEL  
42-Mast-cells-IgE GSM258713.CEL  
41-Mast-cells GSM258712.CEL  
40-Granulocytes GSM258668.CEL  
39-Granulocytes GSM258667.CEL  
38-GMP GSM258666.CEL  
37-GMP GSM258665.CEL  
36-GMP GSM258664.CEL  
35-CMP GSM258642.CEL  
34-CMP GSM258641.CEL  
33-MEP GSM258720.CEL  
32-MEP GSM258719.CEL  
31-HESC GSM258770.CEL  
30-HESC GSM258769.CEL  
29-Bone marrow GSM258628.CEL  
28-Bone marrow GSM258627.CEL  
27-paneth-cells-GF-1 GSM116357.CEL  
26-paneth-cells-GF-1 GSM116350.CEL  
25-paneth-cells GSM116359.CEL  
24-paneth-cells GSM116359.CEL  
23-paneth-cells GSM318589.CEL  
22-paneth-cells GSM318590.CEL  
21-Column-Crypt GSM480375.CEL  
20-Column-Crypt GSM480374.CEL  
19-Column-Vill GSM480363.CEL  
18-Column-Vill GSM480362.CEL  
17-Column-IEC-GF GSM349880.CEL  
16-Column-IEC-GF GSM350375.CEL  
15-Ileum-IEC-GF GSM350376.CEL  
14-Ileum-IEC GSM350371.CEL  
13-Small-intestine-epithelium RMINEP002001.CEL  
12-Small-intestine-epithelium RMINEP001001.CEL  
11-FAE-RMPYEP002001.CEL  
10-FAE-RMPYEP001001.CEL  
09-Ileum-IEC GSM190797.CEL  
08-Ileum-IEC GSM190796.CEL  
07-Ileum-IEC GSM190795.CEL  
06-CT-v-M-cells GSM190794.CEL  
05-CT-v-M-cells GSM190793.CEL  
04-PP-M-cells GSM190792.CEL  
03-PP-M-cells GSM190791.CEL  
02-PP-M-cells GSM190790.CEL  
01-PP-M-cells GSM190789.CEL



Cluster0246\_High in mesenchymal cells (8 nodes)

1,008.2  
955.1  
902  
849  
795.9  
742.9  
689.8  
636.7  
583.7  
530.6  
477.6  
424.5  
371.4  
318.4  
265.3  
212.2  
159.2  
106.1  
53.1  
0

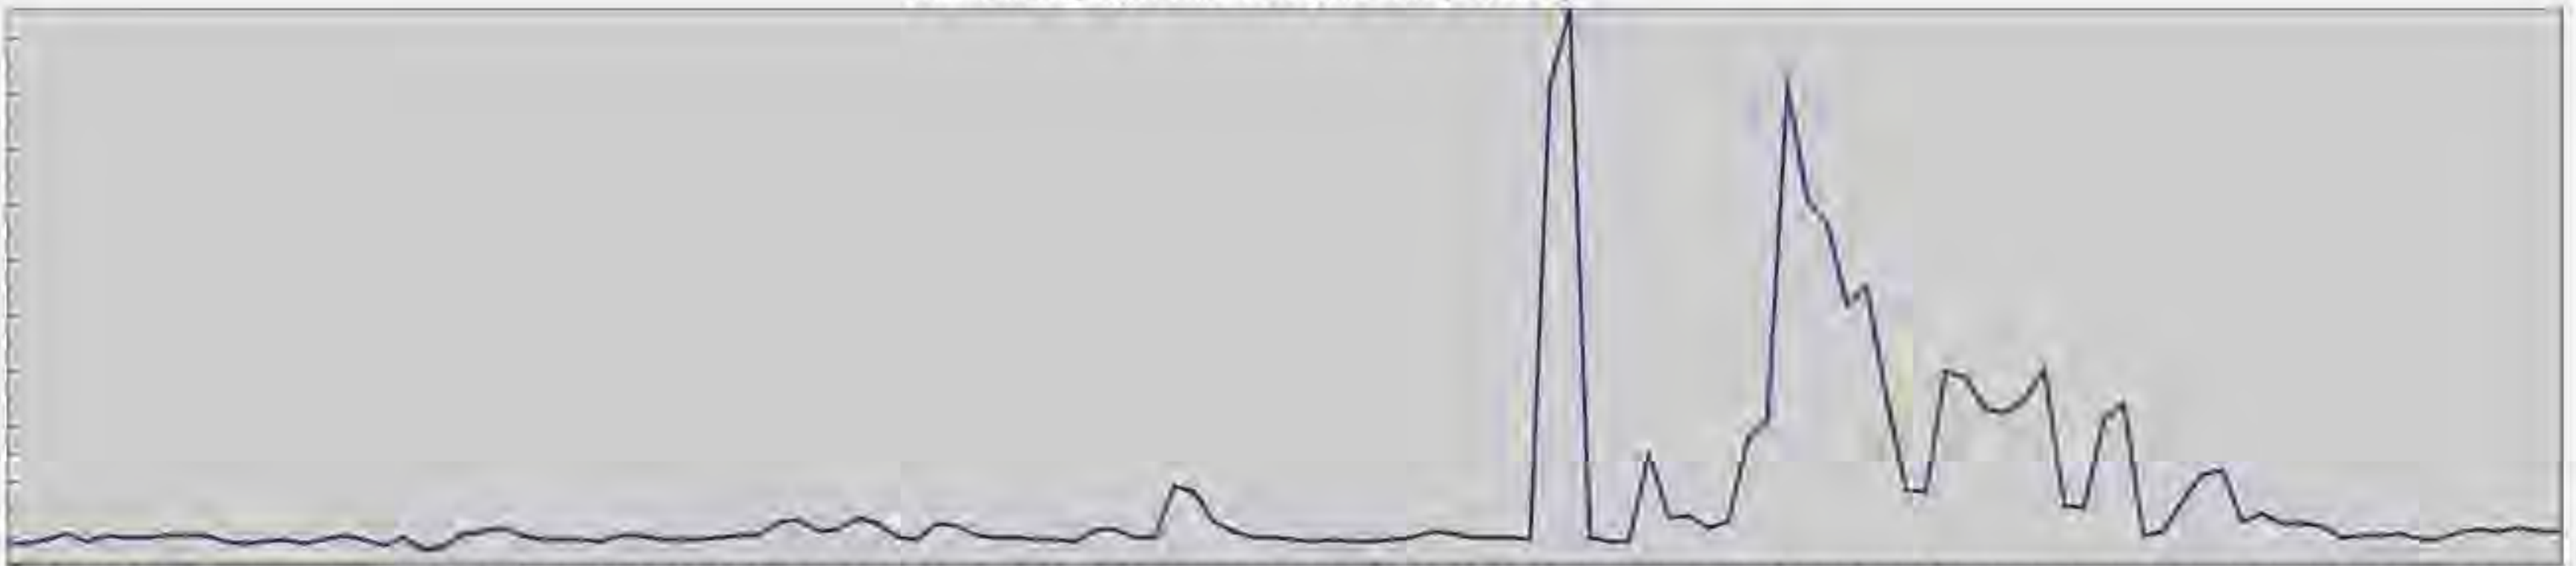

01-PP-M-cells\_GSM190789.CEL  
02-PP-M-cells\_GSM190790.CEL  
03-PP-M-cells\_GSM190791.CEL  
04-CT-V-M-cells\_GSM190792.CEL  
05-CT-V-M-cells\_GSM190793.CEL  
06-CT-V-M-cells\_GSM190794.CEL  
07-Ileum-IEC\_GSM190795.CEL  
08-Ileum-IEC\_GSM190796.CEL  
09-Ileum-IEC\_GSM190797.CEL  
10-FAE-RMPYEP001001.CEL  
11-FAE-RMPYEP002001.CEL  
12-Small-intestine-epithelium\_RMINEP001001.CEL  
13-Small-intestine-epithelium\_RMINEP002001.CEL  
14-Ileum-IEC\_GSM350371.CEL  
15-Ileum-IEC\_GSM350375.CEL  
16-Colon-VIII\_GSM480362.CEL  
17-Colon-VIII\_GSM480363.CEL  
18-Colon-VIII\_GSM480364.CEL  
19-Colon-VIII\_GSM480365.CEL  
20-Colon-Crypt\_GSM480374.CEL  
21-Colon-Crypt\_GSM480375.CEL  
22-Paneth-cells\_GSM318590.CEL  
23-Paneth-cells\_GSM318589.CEL  
24-Paneth-cells\_GSM116359.CEL  
25-Paneth-cells\_GSM116350.CEL  
26-Paneth-cells-GE-1-GSM116357.CEL  
27-Paneth-cells-GE-1-GSM116358.CEL  
28-Paneth-cells-GE-1-GSM116359.CEL  
29-Bone marrow\_GSM258627.CEL  
30-HSC\_GSM258770.CEL  
31-HSC\_GSM258771.CEL  
32-MEP\_GSM258772.CEL  
33-MEP\_GSM258773.CEL  
34-MEP\_GSM258774.CEL  
35-MEP\_GSM258775.CEL  
36-MEP\_GSM258776.CEL  
37-MEP\_GSM258777.CEL  
38-Granulocytes\_GSM258667.CEL  
39-Granulocytes\_GSM258668.CEL  
40-Mast-cells\_GSM258712.CEL  
41-Mast-cells\_GSM258713.CEL  
42-Mast-cells-IdU+Ad-GSM258714.CEL  
43-Mast-cells-IdU+Ad-GSM258715.CEL  
44-Mast-cells-IdU+Ad-GSM258716.CEL  
45-Mast-cells-IdU+Ad-GSM258717.CEL  
46-NK-cells\_GSM258732.CEL  
47-NK-cells\_GSM258733.CEL  
48-CD8a+DC\_GSM258646.CEL  
49-CD8a+DC\_GSM258647.CEL  
50-CD8a-DC\_GSM258647.CEL  
51-CD8a-DC\_GSM258648.CEL  
52-CD8a-DC\_GSM258649.CEL  
53-Plasmacytoid-DC\_GSM258650.CEL  
54-BMM-GSM258694.CEL  
55-BMM-GSM258694.CEL  
56-BMM-LPS-6h-GSM258700.CEL  
57-BMM-LPS-6h-GSM258701.CEL  
58-BMM-LPS-7h-GSM258702.CEL  
59-BMM-LPS-7h-GSM258703.CEL  
60-BMM-LPS-7h-GSM258704.CEL  
61-PP-7h-GSM258705.CEL  
62-Microglia\_GSM258721.CEL  
63-Microglia\_GSM258721.CEL  
64-Osteoclasts\_GSM258743.CEL  
65-Osteoclasts\_GSM258744.CEL  
66-Thymocyte-DN\_GSM465595.CEL  
67-T-cells-CD4+GSM258773.CEL  
68-T-cells-CD4+GSM258774.CEL  
69-T-cells-CD8+GSM258775.CEL  
70-T-cells-CD8+GSM258776.CEL  
71-Tregs\_GSM258777.CEL  
72-Tregs\_GSM258778.CEL  
73-BAF3\_GSM258619.CEL  
74-BAF3\_GSM258620.CEL  
75-MZ-Bcell\_GSM258621.CEL  
76-MZ-Bcell\_GSM258622.CEL  
77-Follicular-Bcells\_GSM258653.CEL  
78-Follicular-Bcells\_GSM258654.CEL  
79-E-L-Y-RMLNDC002001.CEL  
80-E-L-Y-RMLNDC003001.CEL  
81-PP-FDC\_GSM481976.CEL  
82-PP-FDC\_GSM481977.CEL  
83-PP-FDC\_GSM481978.CEL  
84-Lymph-endo-cells\_GSM143704.CEL  
85-MS-1\_GSM234692.CEL  
86-LT-cell\_GSM465596.CEL  
87-Nat Helper cell\_GSM465593.CEL  
88-Nat Helper cell\_GSM465594.CEL  
89-Chondrocytes\_GSM266741.CEL  
90-Chondrocytes\_GSM266740.CEL  
91-Osteoblast-d5\_GSM258741.CEL  
92-Osteoblast-d5\_GSM258742.CEL  
93-Osteoblast-d14\_GSM258737.CEL  
94-Osteoblast-d14\_GSM258738.CEL  
95-Osteoblast-d21\_GSM258739.CEL  
96-Osteoblast-d21\_GSM258740.CEL  
97-10T1/2\_GSM258631.CEL  
98-10T1/2\_GSM258632.CEL  
99-3T3-L1\_GSM258609.CEL  
100-3T3-L1\_GSM258610.CEL  
101-NH3T3\_GSM258729.CEL  
102-NH3T3\_GSM258730.CEL  
103-C2C12\_GSM258629.CEL  
104-C2C12\_GSM258630.CEL  
106-Brca4\_GSM258656.CEL  
107-MIMCD3\_GSM258656.CEL  
108-MIMCD3\_GSM258656.CEL  
109-mim6\_GSM258725.CEL  
110-mim6\_GSM258726.CEL  
111-Astrocytes\_GSM241898.CEL  
112-Neuro2a\_GSM258728.CEL  
113-Neuro2a\_GSM258729.CEL  
114-Spleen\_GSM258767.CEL  
115-Spleen\_GSM258768.CEL  
116-Lymph-nodes\_GSM258691.CEL  
117-Lymph-nodes\_GSM258692.CEL  
118-Intestine-small\_GSM258677.CEL  
119-Intestine-small\_GSM258678.CEL  
120-Intestine-large\_GSM258675.CEL  
121-Intestine-large\_GSM258676.CEL  
122-Colon-d4\_GSM198810.CEL  
123-Colon-d4\_GSM198811.CEL  
124-Colon-d9\_GSM198810.CEL  
125-Colon-d9\_GSM198811.CEL  
126-Colon-d9\_GSM198812.CEL  
127-NALT\_GSM289408.CEL  
128-NALT\_GSM289409.CEL  
129-NALT\_GSM289410.CEL  
130-NALT\_GSM289411.CEL



Cluster0247\_High in astrocytes (8 nodes)

2,891.9  
2,739.7  
2,587.5  
2,435.3  
2,283.1  
2,130.9  
1,978.7  
1,826.5  
1,674.3  
1,522.1  
1,369.9  
1,217.7  
1,065.4  
913.2  
761  
608.8  
456.6  
304.4  
152.2  
0

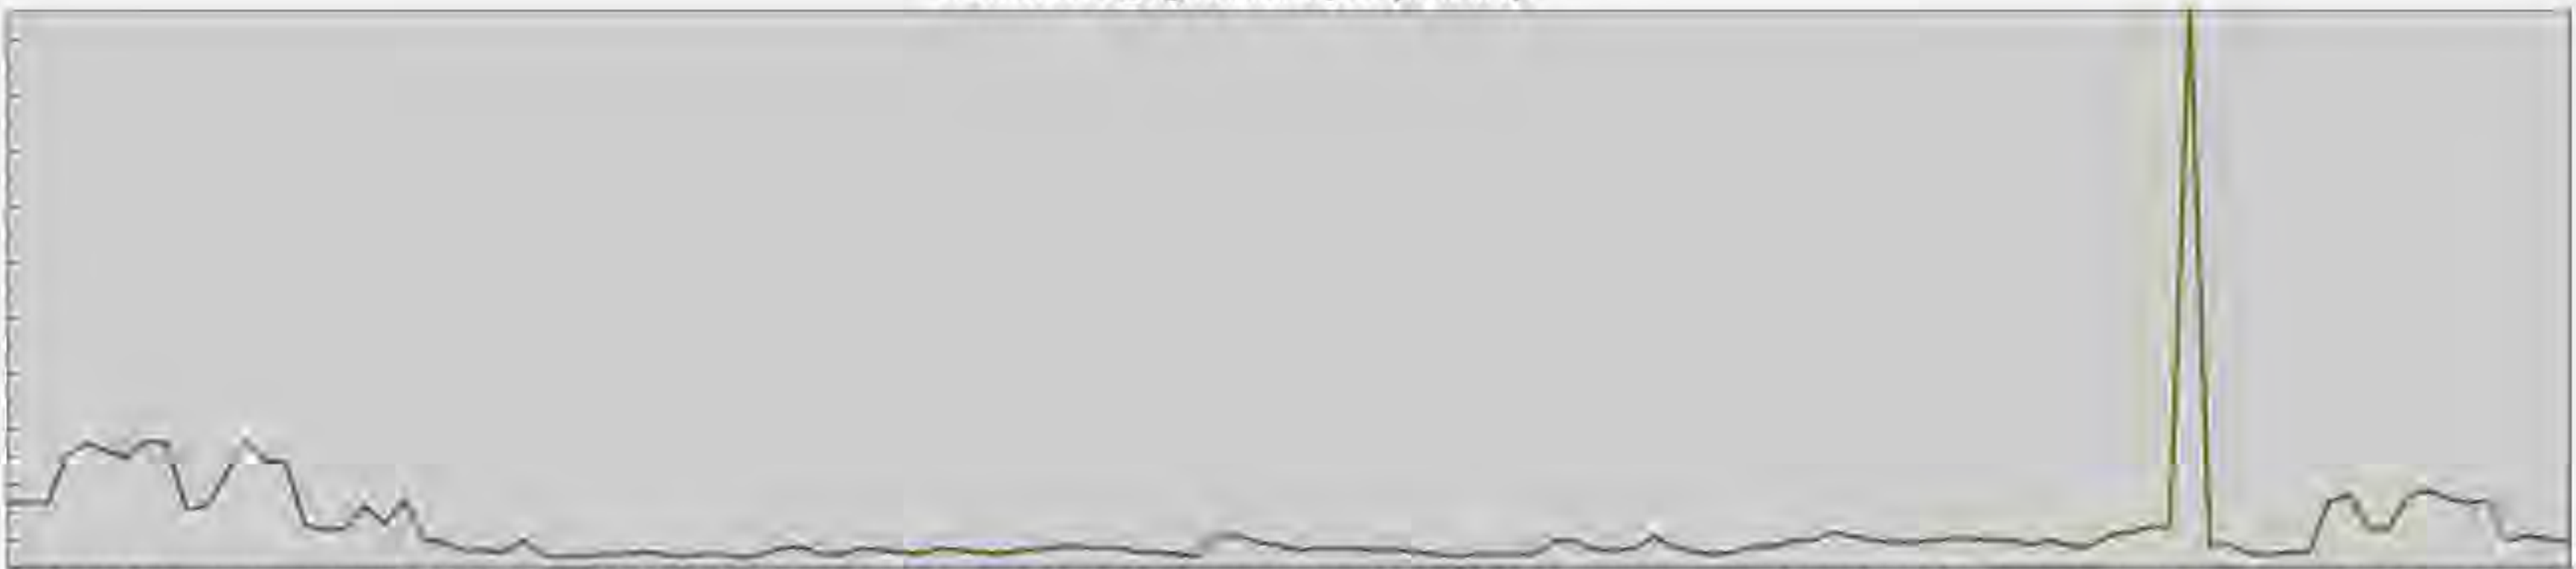

30-NALT GSM289411 CELL  
29-NALT GSM289410 CELL  
28-NALT GSM289409 CELL  
27-NALT GSM289408 CELL  
26-Color-d9 GSM1988105 CELL  
25-Color-d9 GSM1988103 CELL  
24-Color-d9 GSM1988102 CELL  
23-Color-d4 GSM1988101 CELL  
22-Color-d4 GSM1988100 CELL  
21-Intestine-large GSM258675 CELL  
20-Intestine-large GSM258673 CELL  
19-Intestine-small GSM258672 CELL  
18-Intestine-small GSM258671 CELL  
17-Lymph-nodes GSM258669 CELL  
16-Spleen GSM258667 CELL  
15-Spleen GSM258666 CELL  
14-Neuro2a GSM241898 CELL  
13-Astrocytes GSM241898 CELL  
12-mimb GSM258726 CELL  
11-mimb GSM258725 CELL  
10-mimb GSM258724 CELL  
09-MIMCD3 GSM258723 CELL  
08-MIMCD3 GSM258722 CELL  
07-Bruce4 GSM258695 CELL  
06-Bruce4 GSM258694 CELL  
05-C2C12 GSM258690 CELL  
04-C2C12 GSM258689 CELL  
03-NH3T3 GSM258739 CELL  
02-NH3T3 GSM258739 CELL  
01-3T3-L1 GSM258610 CELL  
99-3T3-L1 GSM258609 CELL  
98-10T12 GSM258632 CELL  
97-10T12 GSM258631 CELL  
96-Osteoblast-d21 GSM258740 CELL  
95-Osteoblast-d21 GSM258739 CELL  
94-Osteoblast-d14 GSM258738 CELL  
93-Osteoblast-d14 GSM258737 CELL  
92-Osteoblast-d5 GSM258742 CELL  
91-Osteoblast-d5 GSM258741 CELL  
90-Chondrocytes GSM266741 CELL  
89-Chondrocytes GSM266740 CELL  
88-Nat Helper cell GSM465594 CELL  
87-Nat Helper cell GSM465593 CELL  
86-LT cell GSM465596 CELL  
85-MS-1 GSM234692 CELL  
84-Lymph-endo-cells GSM143704 CELL  
83-PP-FDC GSM481977 CELL  
82-PP-FDC GSM481976 CELL  
81-PP-FDC GSM481976 CELL  
80-F-LY RMLNDCC003001 CELL  
79-F-LY RMLNDCC003001 CELL  
78-Follicular-B-cells GSM258664 CELL  
77-Follicular-B-cells GSM258663 CELL  
76-MZ-Bcell GSM258622 CELL  
75-MZ-Bcell GSM258621 CELL  
74-BAF3 GSM258620 CELL  
73-BAF3 GSM258619 CELL  
72-Tregs GSM258778 CELL  
71-Tregs GSM258777 CELL  
70-T-cells-CD8+ GSM258776 CELL  
69-T-cells-CD8+ GSM258774 CELL  
68-T-cells-CD4+ GSM258773 CELL  
67-T-cells-CD4+ GSM258773 CELL  
66-Thymocyte-DN GSM465595 CELL  
65-Osteoclasts GSM258743 CELL  
64-Osteoclasts GSM258743 CELL  
63-Microglia GSM258721 CELL  
62-Microglia GSM258721 CELL  
61-MM-LPS-7h GSM258706 CELL  
60-MM-LPS-7h GSM258706 CELL  
59-MM-LPS-6h GSM258702 CELL  
58-MM-LPS-6h GSM258702 CELL  
57-MM-LPS-6h GSM258699 CELL  
56-MM-LPS-6h GSM258699 CELL  
55-MM-LPS-6h GSM258694 CELL  
54-MM-LPS-6h GSM258694 CELL  
53-Ismacryoid-DC GSM258650 CELL  
52-Ismacryoid-DC GSM258649 CELL  
51-CD8a-DC GSM258648 CELL  
50-CD8a-DC GSM258647 CELL  
49-CD8a+DC GSM258646 CELL  
48-CD8a+DC GSM258646 CELL  
47-NK-cells GSM258732 CELL  
46-NK-cells GSM258731 CELL  
45-Mast-cells-IgE+Ad GSM258719 CELL  
44-Mast-cells-IgE+Ad GSM258717 CELL  
43-Mast-cells-IgE GSM258714 CELL  
42-Mast-cells-IgE GSM258713 CELL  
41-Mast-cells GSM258712 CELL  
40-Granulocytes GSM258667 CELL  
39-Granulocytes GSM258667 CELL  
38-GMP GSM258666 CELL  
37-GMP GSM258665 CELL  
36-GMP GSM258664 CELL  
35-GMP GSM258642 CELL  
34-MEMP GSM258641 CELL  
33-MEMP GSM258720 CELL  
32-MEMP GSM258719 CELL  
31-HESC GSM258770 CELL  
30-HESC GSM258769 CELL  
29-Bone marrow GSM258628 CELL  
28-Bone marrow GSM258627 CELL  
27-paneth-cells-GE GSM116358 CELL  
26-paneth-cells-GE GSM116357 CELL  
25-paneth-cells GSM116350 CELL  
24-paneth-cells GSM116359 CELL  
23-paneth-cells GSM318589 CELL  
22-paneth-cells GSM318590 CELL  
21-paneth-cells GSM318590 CELL  
20-Colon-Crypt GSM480375 cel  
19-Colon-VIII GSM480363 cel  
18-Colon-VIII GSM480362 cel  
17-Colon-IEC-GE GSM349880 CELL  
16-Colon-IEC-GE GSM350375 CELL  
15-Ileum-IEC GSM350376 CELL  
14-Ileum-IEC GSM350371 CELL  
13-Small-intestine-epithelium RMINEP002901 CELL  
12-Small-intestine-epithelium RMINEP001001 CELL  
11-FAE RMPYEP002001 CELL  
10-FAE RMPYEP001001 CELL  
09-Ileum-IEC GSM190797 CELL  
08-Ileum-IEC GSM190796 CELL  
07-Ileum-IEC GSM190795 CELL  
06-CT-w-M-cells GSM190794 CELL  
05-CT-w-M-cells GSM190793 CELL  
04-CT-y-M-cells GSM190792 CELL  
03-PP-M-cells GSM190791 CELL  
02-PP-M-cells GSM190790 CELL  
01-PP-M-cells GSM190789 CELL



Cluster0248\_High in colon IEC (8 nodes)

4,052.8  
3,839.5  
3,626.2  
3,412.9  
3,199.6  
2,986.3  
2,773  
2,559.7  
2,346.4  
2,133  
1,919.7  
1,706.4  
1,493.1  
1,279.8  
1,066.5  
853.2  
639.9  
426.6  
213.3  
0

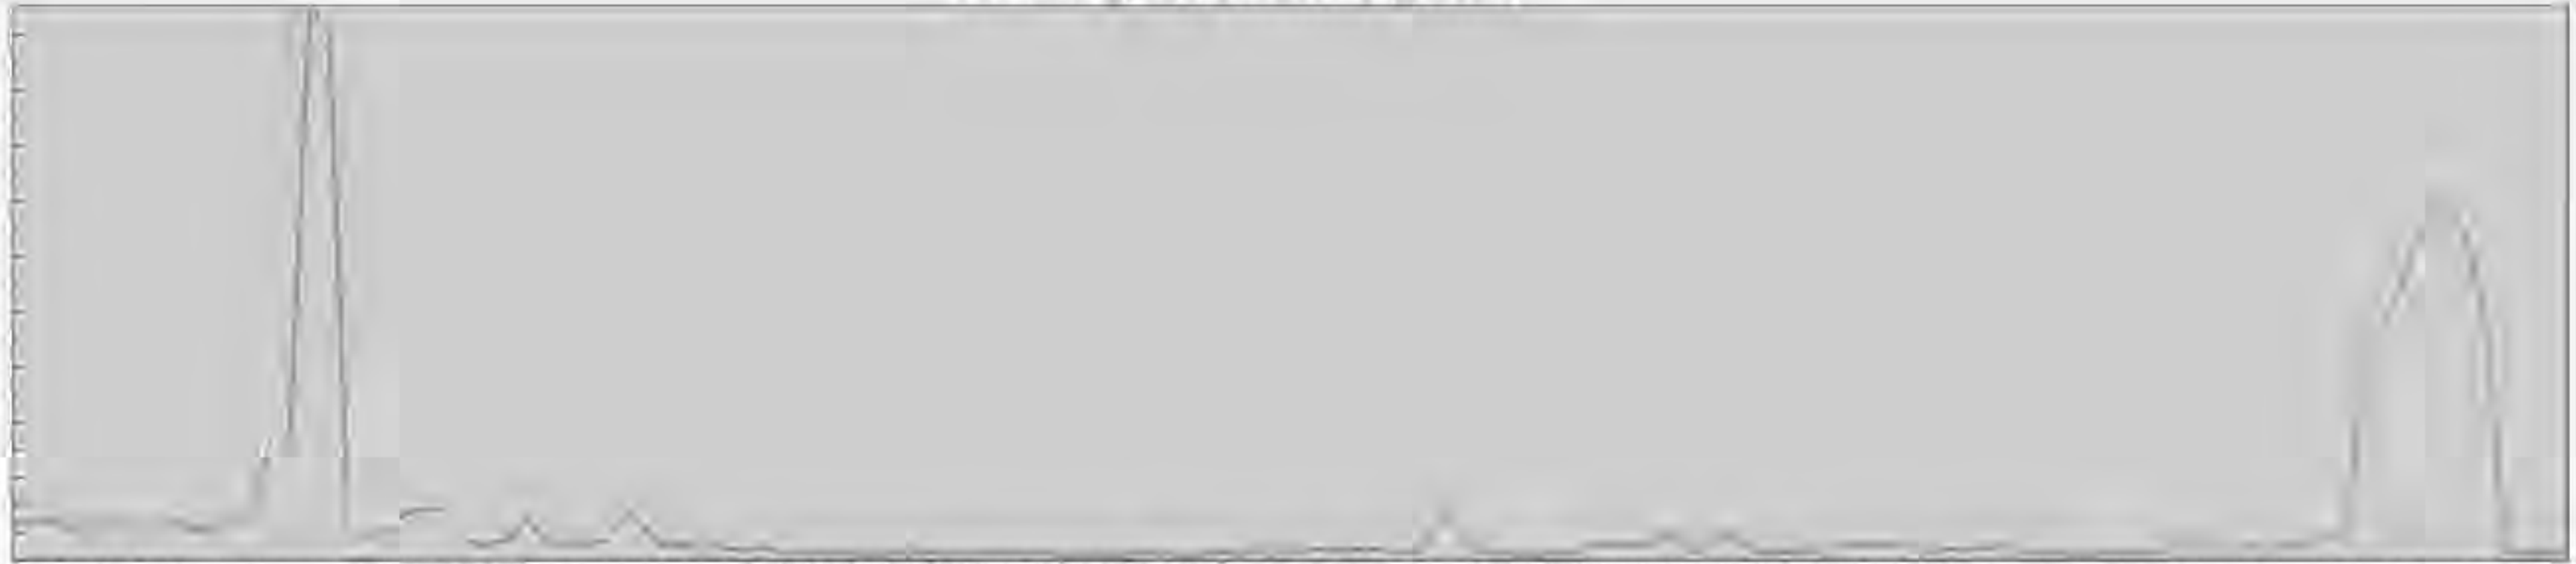

|     |                            |              |     |
|-----|----------------------------|--------------|-----|
| 01  | PP-M-cells                 | GSM190789    | CEL |
| 02  | PP-M-cells                 | GSM190790    | CEL |
| 03  | PP-M-cells                 | GSM190791    | CEL |
| 04  | CT-y-M-cells               | GSM190792    | CEL |
| 05  | CT-y-M-cells               | GSM190793    | CEL |
| 06  | CT-w-M-cells               | GSM190794    | CEL |
| 07  | Ileum-IEC                  | GSM190795    | CEL |
| 08  | Ileum-IEC                  | GSM190796    | CEL |
| 09  | Ileum-IEC                  | GSM190797    | CEL |
| 10  | FAE-RMP                    | GSM190798    | CEL |
| 11  | FAE-RMP                    | GSM190799    | CEL |
| 12  | Small-intestine-epithelium | RMINEP001001 | CEL |
| 13  | Small-intestine-epithelium | RMINEP002001 | CEL |
| 14  | Ileum-IEC                  | GSM350371    | CEL |
| 15  | Ileum-IEC                  | GSM350375    | CEL |
| 16  | Colon-VIII                 | GSM480362    | cel |
| 17  | Colon-VIII                 | GSM480363    | cel |
| 18  | Colon-VIII                 | GSM480364    | cel |
| 19  | Colon-VIII                 | GSM480365    | cel |
| 20  | Colon-Crypt                | GSM480374    | cel |
| 21  | Colon-Crypt                | GSM480375    | cel |
| 22  | Paneth-cells               | GSM318589    | CEL |
| 23  | Paneth-cells               | GSM318590    | CEL |
| 24  | Paneth-cells               | GSM116359    | CEL |
| 25  | Paneth-cells               | GSM116359    | CEL |
| 26  | Paneth-cells               | GSM116357    | CEL |
| 27  | Paneth-cells               | GSM116357    | CEL |
| 28  | Bone marrow                | GSM258627    | CEL |
| 29  | Bone marrow                | GSM258628    | CEL |
| 30  | HSC                        | GSM258770    | CEL |
| 31  | HSC                        | GSM258770    | CEL |
| 32  | MIEP                       | GSM258771    | CEL |
| 33  | MIEP                       | GSM258771    | CEL |
| 34  | MIEP                       | GSM258771    | CEL |
| 35  | MIEP                       | GSM258771    | CEL |
| 36  | GMP                        | GSM258665    | CEL |
| 37  | GMP                        | GSM258665    | CEL |
| 38  | GMP                        | GSM258665    | CEL |
| 39  | Granulocytes               | GSM258667    | CEL |
| 40  | Mast-cells                 | GSM258712    | CEL |
| 41  | Mast-cells                 | GSM258712    | CEL |
| 42  | Mast-cells                 | GSM258713    | CEL |
| 43  | Mast-cells                 | GSM258713    | CEL |
| 44  | Mast-cells                 | GSM258714    | CEL |
| 45  | Mast-cells                 | GSM258714    | CEL |
| 46  | NK-cells                   | GSM258732    | CEL |
| 47  | NK-cells                   | GSM258732    | CEL |
| 48  | CD8a+DC                    | GSM258646    | CEL |
| 49  | CD8a+DC                    | GSM258646    | CEL |
| 50  | CD8a-DC                    | GSM258647    | CEL |
| 51  | CD8a-DC                    | GSM258647    | CEL |
| 52  | CD8a-DC                    | GSM258647    | CEL |
| 53  | Iasmacryoid-DC             | GSM258650    | CEL |
| 54  | Iasmacryoid-DC             | GSM258650    | CEL |
| 55  | MM                         | GSM258694    | CEL |
| 56  | MM                         | GSM258694    | CEL |
| 57  | MM                         | GSM258700    | CEL |
| 58  | MM                         | GSM258700    | CEL |
| 59  | MM                         | GSM258702    | CEL |
| 60  | MM                         | GSM258702    | CEL |
| 61  | MM                         | GSM258706    | CEL |
| 62  | Microglia                  | GSM258721    | CEL |
| 63  | Microglia                  | GSM258721    | CEL |
| 64  | Osteoclasts                | GSM258743    | CEL |
| 65  | Osteoclasts                | GSM258743    | CEL |
| 66  | Thymocyte-DN               | GSM465595    | CEL |
| 67  | T-cells-CD4+               | GSM258773    | CEL |
| 68  | T-cells-CD4+               | GSM258773    | CEL |
| 69  | T-cells-CD8+               | GSM258775    | CEL |
| 70  | T-cells-CD8+               | GSM258775    | CEL |
| 71  | Tregs                      | GSM258778    | CEL |
| 72  | Tregs                      | GSM258778    | CEL |
| 73  | BAF3                       | GSM258619    | CEL |
| 74  | BAF3                       | GSM258620    | CEL |
| 75  | MZ-Bcell                   | GSM258622    | CEL |
| 76  | MZ-Bcell                   | GSM258622    | CEL |
| 77  | Follicular-Bcells          | GSM258664    | CEL |
| 78  | Follicular-Bcells          | GSM258664    | CEL |
| 79  | E-L                        | RMLNDC002001 | CEL |
| 80  | E-L                        | RMLNDC003001 | CEL |
| 81  | PP-FDC                     | GSM481976    | CEL |
| 82  | PP-FDC                     | GSM481978    | CEL |
| 83  | PP-FDC                     | GSM481978    | CEL |
| 84  | Lymph-endo-cells           | GSM143704    | CEL |
| 85  | MS-1                       | GSM234692    | CEL |
| 86  | TI cell                    | GSM465596    | CEL |
| 87  | Nat Helper cell            | GSM465593    | CEL |
| 88  | Nat Helper cell            | GSM465594    | CEL |
| 89  | Chondrocytes               | GSM258741    | CEL |
| 90  | Chondrocytes               | GSM258741    | CEL |
| 91  | Osteoblast-d5              | GSM258742    | CEL |
| 92  | Osteoblast-d5              | GSM258742    | CEL |
| 93  | Osteoblast-d14             | GSM258737    | CEL |
| 94  | Osteoblast-d14             | GSM258738    | CEL |
| 95  | Osteoblast-d21             | GSM258740    | CEL |
| 96  | Osteoblast-d21             | GSM258739    | CEL |
| 97  | OT12                       | GSM258631    | CEL |
| 98  | OT12                       | GSM258632    | CEL |
| 99  | 3T3-L1                     | GSM258609    | CEL |
| 100 | 3T3-L1                     | GSM258610    | CEL |
| 101 | NH3T3                      | GSM258739    | CEL |
| 102 | NH3T3                      | GSM258739    | CEL |
| 103 | C2C12                      | GSM258629    | CEL |
| 104 | C2C12                      | GSM258630    | CEL |
| 105 | Bruce4                     | GSM258656    | CEL |
| 106 | Bruce4                     | GSM258656    | CEL |
| 107 | MIMCD3                     | GSM258723    | CEL |
| 108 | MIMCD3                     | GSM258723    | CEL |
| 109 | mim6                       | GSM258725    | CEL |
| 110 | mim6                       | GSM258725    | CEL |
| 111 | Astrocytes                 | GSM241898    | CEL |
| 112 | Neuro2a                    | GSM258728    | CEL |
| 113 | Spleen                     | GSM258767    | CEL |
| 114 | Spleen                     | GSM258767    | CEL |
| 115 | Lymph-nodes                | GSM258691    | CEL |
| 116 | Lymph-nodes                | GSM258691    | CEL |
| 117 | Lymph-nodes                | GSM258675    | CEL |
| 118 | Intestine-small            | GSM258677    | CEL |
| 119 | Intestine-large            | GSM258679    | CEL |
| 120 | Intestine-large            | GSM258679    | CEL |
| 121 | Intestine-large            | GSM258676    | CEL |
| 122 | Colon-d4                   | GSM198810    | CEL |
| 123 | Colon-d4                   | GSM198810    | CEL |
| 124 | Colon-d9                   | GSM198810    | CEL |
| 125 | Colon-d9                   | GSM198810    | CEL |
| 126 | Colon-d9                   | GSM198810    | CEL |
| 127 | NALT                       | GSM289408    | CEL |
| 128 | NALT                       | GSM289409    | CEL |
| 129 | NALT                       | GSM289410    | CEL |
| 130 | NALT                       | GSM289411    | CEL |



Cluster0249\_Uncertain-low in many (8 nodes)

137.1  
129.9  
122.7  
115.5  
108.2  
101  
93.8  
86.6  
79.4  
72.2  
64.9  
57.7  
50.5  
43.3  
36.1  
28.9  
21.6  
14.4  
7.2  
0

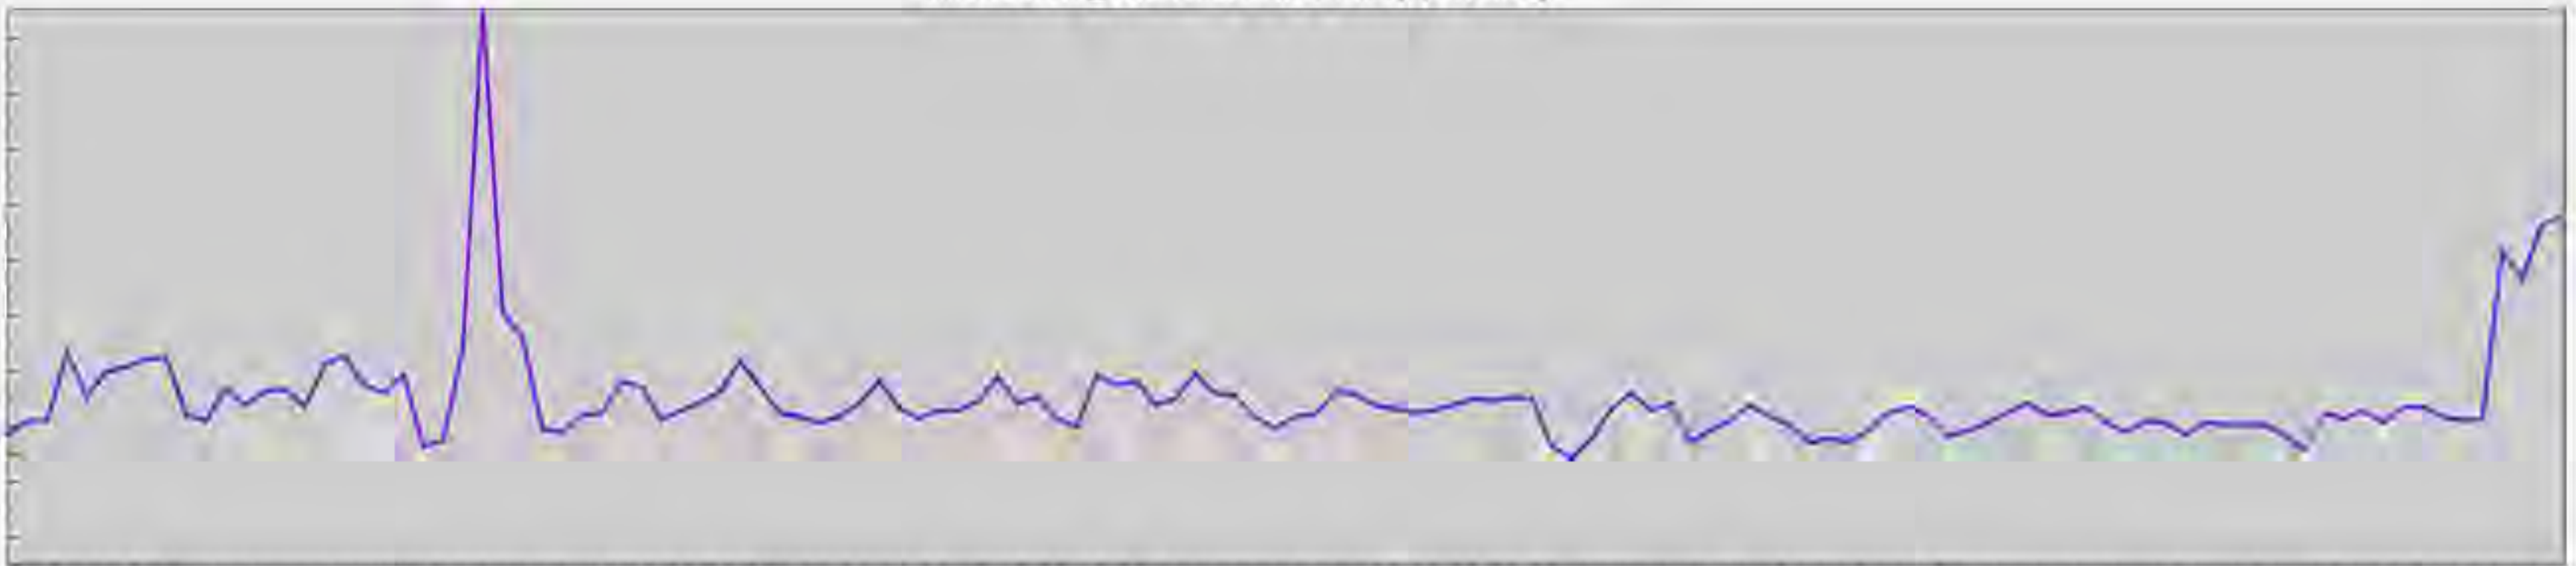

130-NALT GSM289411.CEL  
129-NALT GSM289410.CEL  
128-NALT GSM289409.CEL  
127-NALT GSM289408.CEL  
126-Colon-d9 GSM1988105.CEL  
125-Colon-d9 GSM1988103.CEL  
124-Colon-d9 GSM1988102.CEL  
123-Colon-d4 GSM1988101.CEL  
122-Colon-d4 GSM1988101.CEL  
121-Intestine-large GSM258676.CEL  
120-Intestine-large GSM258675.CEL  
119-Intestine-small GSM258678.CEL  
118-Intestine-small GSM258692.CEL  
117-Lymph-nodes GSM258691.CEL  
116-Lymph-nodes GSM258726.CEL  
115-Spleen GSM258767.CEL  
114-Spleen GSM258767.CEL  
113-Neuro2a GSM258728.CEL  
112-Neuro2a GSM258727.CEL  
111-Astrocytes GSM241898.CEL  
110-mim6 GSM258726.CEL  
109-mim6 GSM258725.CEL  
108-MIMCD3 GSM258724.CEL  
107-MIMCD3 GSM258723.CEL  
106-Bruce4 GSM258656.CEL  
105-Bruce4 GSM258656.CEL  
104-C2C12 GSM258690.CEL  
103-C2C12 GSM258629.CEL  
102-NH3T3 GSM258739.CEL  
101-NH3T3 GSM258739.CEL  
100-3T3-L1 GSM258610.CEL  
99-3T3-L1 GSM258609.CEL  
98-10T12 GSM258632.CEL  
97-10T12 GSM258631.CEL  
96-Osteoblast-d21 GSM258740.CEL  
95-Osteoblast-d21 GSM258739.CEL  
94-Osteoblast-d14 GSM258738.CEL  
93-Osteoblast-d14 GSM258737.CEL  
92-Osteoblast-d5 GSM258742.CEL  
91-Osteoblast-d5 GSM258741.CEL  
90-Chondrocytes GSM266741.CEL  
89-Chondrocytes GSM266740.CEL  
88-Nat Helper cell GSM465594.CEL  
87-Nat Helper cell GSM465593.CEL  
86-TT cell GSM465596.CEL  
85-MS-1 GSM234692.CEL  
84-Lymph-endo-cells GSM143704.CEL  
83-PP-FDC GSM481977.CEL  
82-PP-FDC GSM481978.CEL  
81-PP-FDC GSM481976.CEL  
80-LY-RMLNDCC003001.CEL  
79-LY-RMLNDCC003001.CEL  
78-Follicular-Bcells GSM258664.CEL  
77-Follicular-Bcells GSM258663.CEL  
76-MZ-Bcell GSM258627.CEL  
75-MZ-Bcell GSM258627.CEL  
74-BAF3 GSM258620.CEL  
73-BAF3 GSM258619.CEL  
72-Tregs GSM258778.CEL  
71-Tregs GSM258777.CEL  
70-T-cells-CD8+ GSM258776.CEL  
69-T-cells-CD8+ GSM258774.CEL  
68-T-cells-CD4+ GSM258773.CEL  
67-T-cells-CD4+ GSM258773.CEL  
66-Thymocyte-DN GSM465595.CEL  
65-Osteoclasts GSM258743.CEL  
64-Microglia GSM258721.CEL  
63-Microglia GSM258721.CEL  
62-MM-LPS-7h GSM258706.CEL  
61-MM-LPS-7h GSM258706.CEL  
60-MM-LPS-7h GSM258705.CEL  
59-MM-LPS-6h GSM258702.CEL  
58-MM-LPS-6h GSM258702.CEL  
57-MM-LPS-6h GSM258699.CEL  
56-MM-LPS-6h GSM258699.CEL  
55-MM-LPS-6h GSM258694.CEL  
54-Plasmacytoid-DC GSM258650.CEL  
53-Plasmacytoid-DC GSM258649.CEL  
52-CD8a-DC GSM258647.CEL  
51-CD8a-DC GSM258647.CEL  
50-CD8a+DC GSM258646.CEL  
49-CD8a+DC GSM258646.CEL  
48-NK-cells GSM258732.CEL  
47-NK-cells GSM258732.CEL  
46-NK-cells GSM258731.CEL  
45-Mast-cells-IgE+Ad GSM258718.CEL  
44-Mast-cells-IgE+Ad GSM258717.CEL  
43-Mast-cells-IgE GSM258714.CEL  
42-Mast-cells-IgE GSM258713.CEL  
41-Mast-cells GSM258712.CEL  
40-Granulocytes GSM258668.CEL  
39-Granulocytes GSM258667.CEL  
38-GMP GSM258666.CEL  
37-GMP GSM258666.CEL  
36-GMP GSM258665.CEL  
35-GMP GSM258642.CEL  
34-GMP GSM258642.CEL  
33-MEP GSM258720.CEL  
32-MEP GSM258719.CEL  
31-HSC GSM258770.CEL  
30-HSC GSM258770.CEL  
29-Bone marrow GSM258628.CEL  
28-Bone marrow GSM258627.CEL  
27-paneth-cells-GE GSM116357.CEL  
26-paneth-cells-GE GSM116350.CEL  
25-paneth-cells GSM116350.CEL  
24-paneth-cells GSM116359.CEL  
23-paneth-cells GSM318589.CEL  
22-paneth-cells GSM318590.CEL  
21-Colon-Crypt GSM480375.CEL  
20-Colon-Crypt GSM480374.CEL  
19-Colon-Vill GSM480363.CEL  
18-Colon-Vill GSM480362.CEL  
17-Colon-IEC-GE GSM349880.CEL  
16-Colon-IEC-GE GSM350375.CEL  
15-Ileum-IEC-TGF GSM350376.CEL  
14-Ileum-IEC GSM350371.CEL  
13-Small-intestine-epithelium RMINEP002001.CEL  
12-Small-intestine-epithelium RMINEP001001.CEL  
11-FAE-RMPYEP002001.CEL  
10-FAE-RMPYEP001001.CEL  
09-Ileum-IEC GSM190797.CEL  
08-Ileum-IEC GSM190796.CEL  
07-Ileum-IEC GSM190795.CEL  
06-CT-v-M-cells GSM190794.CEL  
05-CT-v-M-cells GSM190793.CEL  
04-CT-v-M-cells GSM190792.CEL  
03-PP-M-cells GSM190791.CEL  
02-PP-M-cells GSM190790.CEL  
01-PP-M-cells GSM190789.CEL



Cluster0250\_Uncertain (8 nodes)

344.2  
326.1  
308  
289.8  
271.7  
253.6  
235.5  
217.4  
199.3  
181.2  
163  
144.9  
126.8  
108.7  
90.6  
72.5  
54.3  
36.2  
18.1  
0

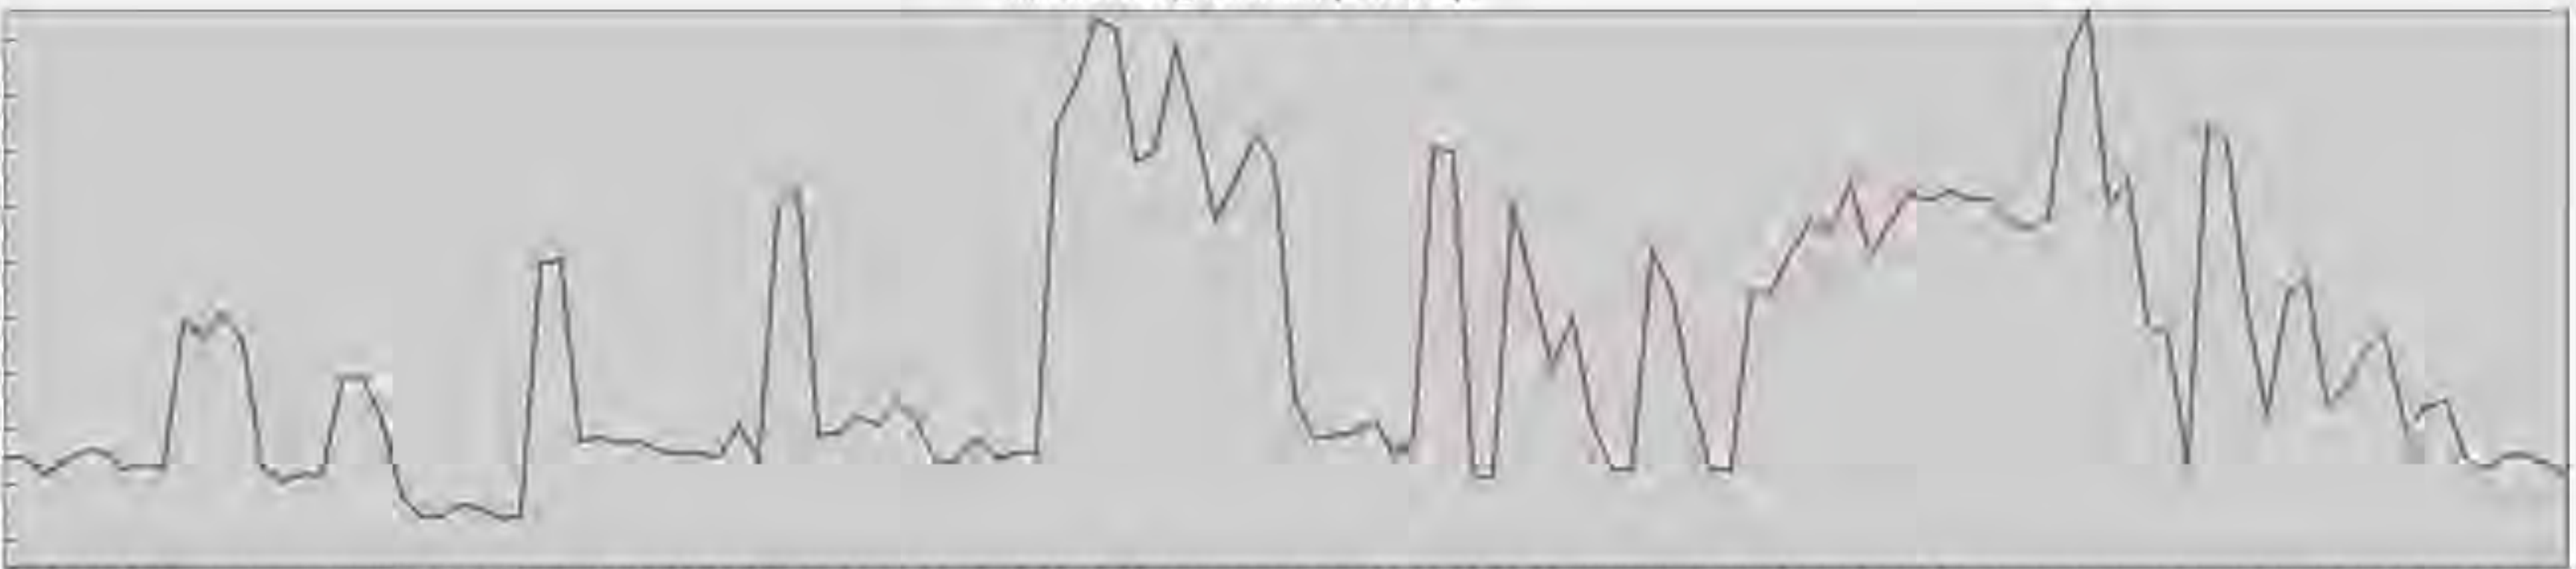

01-PP-M-cells\_GSM190789.CEL  
 02-PP-M-cells\_GSM190790.CEL  
 03-PP-M-cells\_GSM190791.CEL  
 04-CT-V-M-cells\_GSM190792.CEL  
 05-CT-V-M-cells\_GSM190793.CEL  
 06-CT-V-M-cells\_GSM190794.CEL  
 07-Ileum-IEC\_GSM190795.CEL  
 08-Ileum-IEC\_GSM190796.CEL  
 09-Ileum-IEC\_GSM190797.CEL  
 10-FAE-RMP-EP001001.CEL  
 11-FAE-RMP-EP002001.CEL  
 12-Small-intestine-epithelium\_RMINEP001001.CEL  
 13-Small-intestine-epithelium\_RMINEP002001.CEL  
 14-Ileum-IEC\_GSM350371.CEL  
 15-Ileum-IEC\_GSM350375.CEL  
 16-Colon-IEC-GF\_GSM349880.CEL  
 17-Colon-VIII\_GSM480362.CEL  
 18-Colon-VIII\_GSM480363.CEL  
 19-Colon-VIII\_GSM480364.CEL  
 20-Colon-Crypt\_GSM480374.CEL  
 21-Colon-Crypt\_GSM480375.CEL  
 22-Paneth-cells\_GSM318589.CEL  
 23-Paneth-cells\_GSM318590.CEL  
 24-Paneth-cells\_GSM116359.CEL  
 25-Paneth-cells\_GSM116359.CEL  
 26-Paneth-cells-GF-1-GSM116357.CEL  
 27-Paneth-cells-GF-1-GSM116357.CEL  
 28-Paneth-cells-GF-1-GSM116357.CEL  
 29-Bone marrow\_GSM258627.CEL  
 30-HSC\_GSM258770.CEL  
 31-HSC\_GSM258770.CEL  
 32-MEP\_GSM258770.CEL  
 33-MEP\_GSM258770.CEL  
 34-MEP\_GSM258770.CEL  
 35-MEP\_GSM258770.CEL  
 36-MEP\_GSM258770.CEL  
 37-MEP\_GSM258770.CEL  
 38-Granulocytes\_GSM258667.CEL  
 39-Granulocytes\_GSM258667.CEL  
 40-Mast-cells\_GSM258712.CEL  
 41-Mast-cells\_GSM258712.CEL  
 42-Mast-cells-GF\_GSM258713.CEL  
 43-Mast-cells-GF\_GSM258713.CEL  
 44-Mast-cells-GF+Ad-GSM258718.CEL  
 45-Mast-cells-GF+Ad-GSM258718.CEL  
 46-NK-cells\_GSM258731.CEL  
 47-NK-cells\_GSM258731.CEL  
 48-CD8a+DC\_GSM258646.CEL  
 49-CD8a+DC\_GSM258646.CEL  
 50-CD8a-DC\_GSM258647.CEL  
 51-CD8a-DC\_GSM258647.CEL  
 52-Plasmacytoid-DC\_GSM258650.CEL  
 53-Plasmacytoid-DC\_GSM258650.CEL  
 54-BMM-GSM258694.CEL  
 55-BMM-GSM258694.CEL  
 56-BMM-LPS-6h-GSM258700.CEL  
 57-BMM-LPS-6h-GSM258700.CEL  
 58-BMM-LPS-7h-GSM258702.CEL  
 59-BMM-LPS-7h-GSM258702.CEL  
 60-Microglia\_GSM258721.CEL  
 61-Microglia\_GSM258721.CEL  
 62-Microglia\_GSM258721.CEL  
 63-Osteoclasts\_GSM258743.CEL  
 64-Osteoclasts\_GSM258743.CEL  
 65-Thymocyte-DN\_GSM465595.CEL  
 66-Thymocyte-DN\_GSM465595.CEL  
 67-T-cells-CD4+GSM258773.CEL  
 68-T-cells-CD4+GSM258773.CEL  
 69-T-cells-CD8+GSM258776.CEL  
 70-T-cells-CD8+GSM258776.CEL  
 71-Tregs\_GSM258778.CEL  
 72-Tregs\_GSM258778.CEL  
 73-BAF3\_GSM258620.CEL  
 74-BAF3\_GSM258620.CEL  
 75-MZ-Bcell\_GSM258621.CEL  
 76-MZ-Bcell\_GSM258621.CEL  
 77-Follicular-Bcells\_GSM258664.CEL  
 78-Follicular-Bcells\_GSM258664.CEL  
 79-E-L-Y-RMLNDC002001.CEL  
 80-E-L-Y-RMLNDC003001.CEL  
 81-PP-FDC\_GSM481976.CEL  
 82-PP-FDC\_GSM481976.CEL  
 83-PP-FDC\_GSM481977.CEL  
 84-Lymph-endo-cells\_GSM143704.CEL  
 85-MS-1\_GSM234692.CEL  
 86-LT cell\_GSM465596.CEL  
 87-Nat Helper cell\_GSM465593.CEL  
 88-Nat Helper cell\_GSM465594.CEL  
 89-Chondrocytes\_GSM258741.CEL  
 90-Chondrocytes\_GSM258741.CEL  
 91-Osteoblast-d5\_GSM258742.CEL  
 92-Osteoblast-d5\_GSM258742.CEL  
 93-Osteoblast-d14\_GSM258737.CEL  
 94-Osteoblast-d14\_GSM258738.CEL  
 95-Osteoblast-d21\_GSM258740.CEL  
 96-Osteoblast-d21\_GSM258740.CEL  
 97-10T12\_GSM258631.CEL  
 98-10T12\_GSM258631.CEL  
 99-3T3-L1\_GSM258610.CEL  
 100-3T3-L1\_GSM258610.CEL  
 101-NH3T3\_GSM258739.CEL  
 102-NH3T3\_GSM258739.CEL  
 103-C2C12\_GSM258629.CEL  
 104-C2C12\_GSM258629.CEL  
 105-Bruce4\_GSM258690.CEL  
 106-Bruce4\_GSM258690.CEL  
 107-MIMCD3\_GSM258723.CEL  
 108-MIMCD3\_GSM258723.CEL  
 109-mim6\_GSM258725.CEL  
 110-mim6\_GSM258725.CEL  
 111-Astrocytes\_GSM241898.CEL  
 112-Astrocytes\_GSM241898.CEL  
 113-Spleen\_GSM258767.CEL  
 114-Spleen\_GSM258767.CEL  
 115-Neuro2a\_GSM258728.CEL  
 116-Neuro2a\_GSM258728.CEL  
 117-Lymph-nodes\_GSM258691.CEL  
 118-Lymph-nodes\_GSM258691.CEL  
 119-Intestine-small\_GSM258677.CEL  
 120-Intestine-small\_GSM258677.CEL  
 121-Intestine-large\_GSM258676.CEL  
 122-Intestine-large\_GSM258676.CEL  
 123-Colon-d4\_GSM198810.CEL  
 124-Colon-d4\_GSM198810.CEL  
 125-Colon-d9\_GSM198810.CEL  
 126-Colon-d9\_GSM198810.CEL  
 127-NALT\_GSM289408.CEL  
 128-NALT\_GSM289409.CEL  
 129-NALT\_GSM289410.CEL  
 130-NALT\_GSM289411.CEL



## Cluster0251\_Uncertain (8 nodes)

2,948.8  
2,793.6  
2,638.4  
2,483.2  
2,328  
2,172.8  
2,017.6  
1,862.4  
1,707.2  
1,552  
1,396.8  
1,241.6  
1,086.4  
931.2  
776  
620.8  
465.6  
310.4  
155.2  
0

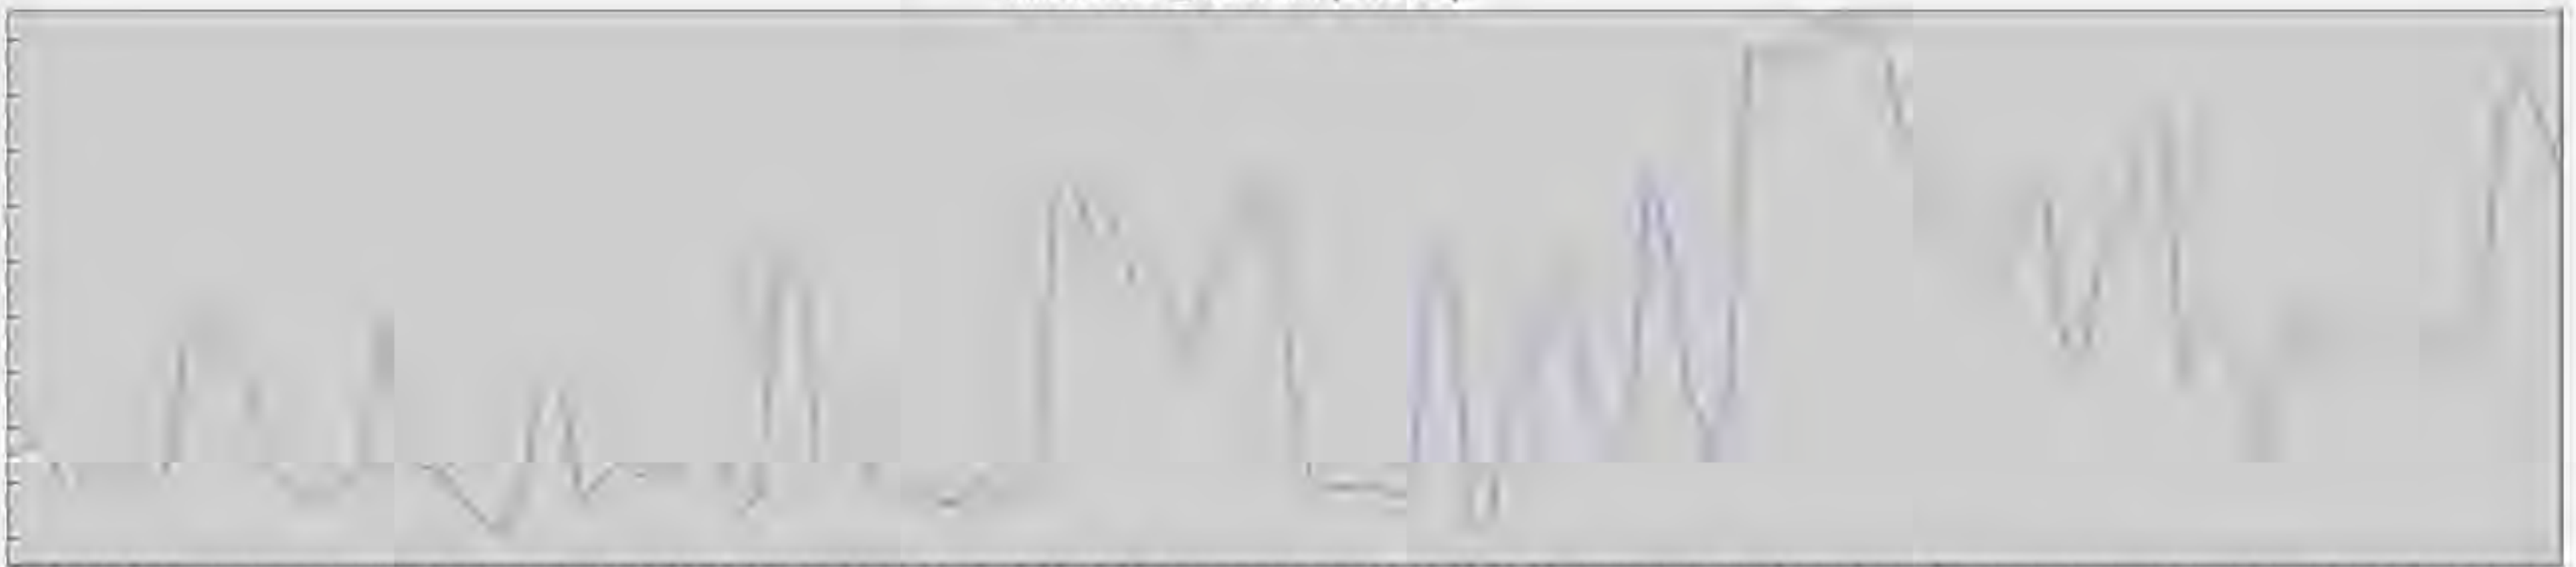

130-NALT GSM289411.CEL  
129-NALT GSM289410.CEL  
128-NALT GSM289409.CEL  
127-NALT GSM289408.CEL  
126-Colon-d9 GSM1988104.CEL  
125-Colon-d9 GSM1988103.CEL  
124-Colon-d4 GSM1988102.CEL  
123-Colon-d4 GSM1988101.CEL  
122-Intestine-large GSM258676.CEL  
121-Intestine-large GSM258675.CEL  
120-Intestine-large GSM258678.CEL  
119-Intestine-small GSM258677.CEL  
118-Intestine-small GSM258692.CEL  
117-Lymph-nodes GSM258691.CEL  
116-Lymph-nodes GSM258726.CEL  
115-Spleen GSM258766.CEL  
114-Spleen GSM258767.CEL  
113-Neuro2a GSM258728.CEL  
112-Neuro2a GSM258727.CEL  
111-Astrocytes GSM241898.CEL  
110-mim6 GSM258726.CEL  
109-mim6 GSM258725.CEL  
108-MIMCD3 GSM258724.CEL  
107-MIMCD3 GSM258723.CEL  
106-Bruce4 GSM258665.CEL  
105-Bruce4 GSM258666.CEL  
104-C2C12 GSM258690.CEL  
103-C2C12 GSM258689.CEL  
102-NH3T3 GSM258739.CEL  
101-NH3T3 GSM258739.CEL  
100-3T3-L1 GSM258610.CEL  
99-3T3-L1 GSM258609.CEL  
98-10T12 GSM258632.CEL  
97-10T12 GSM258631.CEL  
96-Osteoblast-d21 GSM258740.CEL  
95-Osteoblast-d21 GSM258739.CEL  
94-Osteoblast-d14 GSM258738.CEL  
93-Osteoblast-d14 GSM258737.CEL  
92-Osteoblast-d5 GSM258742.CEL  
91-Osteoblast-d5 GSM258741.CEL  
90-Chondrocytes GSM266741.CEL  
89-Chondrocytes GSM266740.CEL  
88-Nat Helper cell GSM465594.CEL  
87-Nat Helper cell GSM465593.CEL  
86-TT cell GSM465596.CEL  
85-MS-1 GSM234692.CEL  
84-Lymph-endo-cells GSM143704.CEL  
83-PP-FDC GSM481977.CEL  
82-PP-FDC GSM481978.CEL  
81-PP-FDC GSM481976.CEL  
80-L-Y RMLNDCC003001.CEL  
79-L-Y RMLNDCC003001.CEL  
78-Follicular-Bcells GSM258664.CEL  
77-Follicular-Bcells GSM258663.CEL  
76-MZ-Bcell GSM258627.CEL  
75-MZ-Bcell GSM258621.CEL  
74-BAF3 GSM258620.CEL  
73-BAF3 GSM258619.CEL  
72-Tregs GSM258778.CEL  
71-Tregs GSM258777.CEL  
70-T-cells-CD8+ GSM258776.CEL  
69-T-cells-CD8+ GSM258774.CEL  
68-T-cells-CD4+ GSM258773.CEL  
67-T-cells-CD4+ GSM258744.CEL  
66-Thymocyte-DN GSM465595.CEL  
65-Osteoclasts GSM258743.CEL  
64-Osteoclasts GSM258743.CEL  
63-Microglia GSM258721.CEL  
62-Microglia GSM258721.CEL  
61-PM-M-PS-7h GSM258706.CEL  
60-PM-M-PS-7h GSM258705.CEL  
59-PM-M-PS-7h GSM258702.CEL  
58-PM-M-PS-6h GSM258700.CEL  
57-PM-M-PS-6h GSM258699.CEL  
56-PM-M-PS-6h GSM258694.CEL  
55-BMM GSM258694.CEL  
54-BMM GSM258694.CEL  
53-Plasmacytoid-DC GSM258650.CEL  
52-Plasmacytoid-DC GSM258649.CEL  
51-CD8a-DC GSM258647.CEL  
50-CD8a-DC GSM258647.CEL  
49-CD8a+DC GSM258646.CEL  
48-CD8a+DC GSM258646.CEL  
47-NK-cells GSM258732.CEL  
46-NK-cells GSM258731.CEL  
45-Mast-cells-IgE+Ad GSM258718.CEL  
44-Mast-cells-IgE+Ad GSM258717.CEL  
43-Mast-cells-IgE GSM258714.CEL  
42-Mast-cells-IgE GSM258713.CEL  
41-Mast-cells GSM258712.CEL  
40-Granulocytes GSM258711.CEL  
39-Granulocytes GSM258668.CEL  
38-Granulocytes GSM258667.CEL  
37-GMP GSM258666.CEL  
36-GMP GSM258666.CEL  
35-GMP GSM258642.CEL  
34-GMP GSM258642.CEL  
33-MEP GSM258720.CEL  
32-MEP GSM258719.CEL  
31-HESC GSM258770.CEL  
30-HESC GSM258770.CEL  
29-Bone marrow GSM258628.CEL  
28-Bone marrow GSM258627.CEL  
27-paneth-cells-GE GSM116357.CEL  
26-paneth-cells-GE GSM116357.CEL  
25-paneth-cells GSM116350.CEL  
24-paneth-cells GSM116359.CEL  
23-paneth-cells GSM318589.CEL  
22-paneth-cells GSM318590.CEL  
21-Colon-Crypt GSM480375.CEL  
20-Colon-Crypt GSM480374.CEL  
19-Colon-Vill GSM480363.CEL  
18-Colon-Vill GSM480362.CEL  
17-Colon-IEC-GE GSM349880.CEL  
16-Colon-IEC-GE GSM350375.CEL  
15-Ileum-IEC GSM350376.CEL  
14-Ileum-IEC GSM350371.CEL  
13-Small-intestine-epithelium RMINEP002001.CEL  
12-Small-intestine-epithelium RMINEP001001.CEL  
11-FAE RMPYEP002001.CEL  
10-FAE RMPYEP001001.CEL  
09-Ileum-IEC GSM190797.CEL  
08-Ileum-IEC GSM190796.CEL  
07-Ileum-IEC GSM190795.CEL  
06-CT-w-M-cells GSM190794.CEL  
05-CT-v-M-cells GSM190793.CEL  
04-PP-M-cells GSM190792.CEL  
03-PP-M-cells GSM190791.CEL  
02-PP-M-cells GSM190790.CEL  
01-PP-M-cells GSM190789.CEL



## Cluster0252\_Uncertain-low in many (8 nodes)

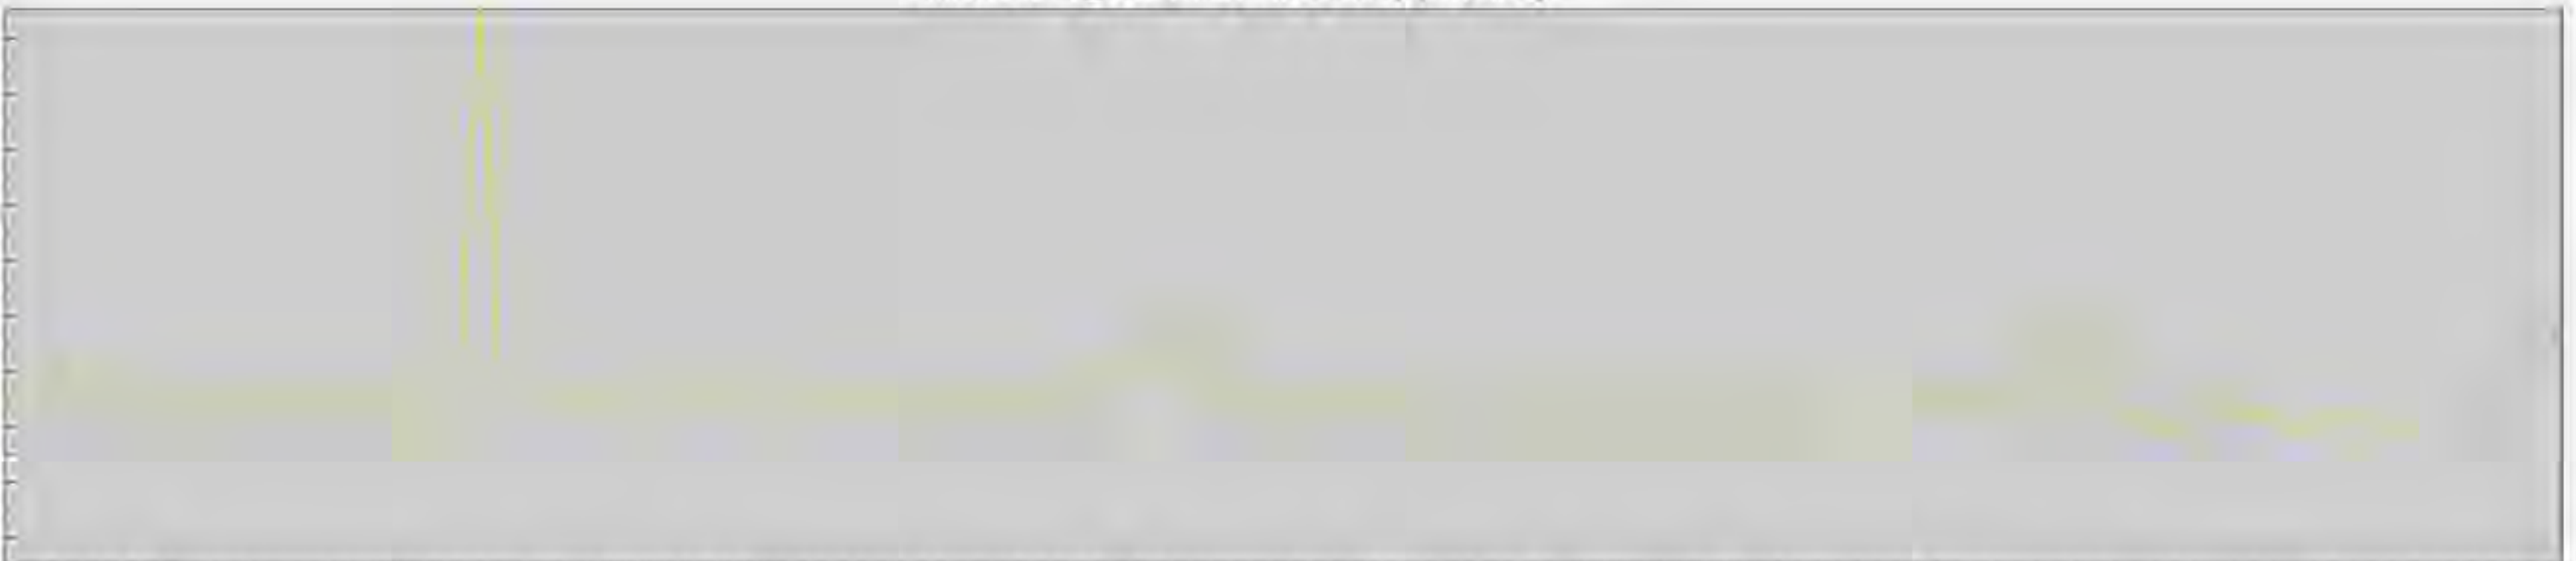

|     |                            |              |     |
|-----|----------------------------|--------------|-----|
| 130 | NALT                       | GSM2899411   | CEL |
| 129 | NALT                       | GSM2899410   | CEL |
| 128 | NALT                       | GSM2899409   | CEL |
| 127 | NALT                       | GSM2899408   | CEL |
| 126 | Colon-d9                   | GSM1988105   | CEL |
| 125 | Colon-d9                   | GSM1988104   | CEL |
| 124 | Colon-d9                   | GSM1988103   | CEL |
| 123 | Colon-d4                   | GSM1988102   | CEL |
| 122 | Colon-d4                   | GSM1988101   | CEL |
| 121 | Intestine-large            | GSM258676    | CEL |
| 120 | Intestine-large            | GSM258675    | CEL |
| 119 | Intestine-small            | GSM258678    | CEL |
| 118 | Intestine-small            | GSM258679    | CEL |
| 117 | Lymph-nodes                | GSM258691    | CEL |
| 116 | Lymph-nodes                | GSM258676    | CEL |
| 115 | Spleen                     | GSM258767    | CEL |
| 114 | Spleen                     | GSM258768    | CEL |
| 113 | Neuro2a                    | GSM258728    | CEL |
| 112 | Neuro2a                    | GSM258729    | CEL |
| 111 | Astrocytes                 | GSM2418998   | CEL |
| 110 | ming                       | GSM258726    | CEL |
| 109 | ming                       | GSM258725    | CEL |
| 108 | MIMCD3                     | GSM258724    | CEL |
| 107 | MIMCD3                     | GSM258723    | CEL |
| 106 | Bruce4                     | GSM258656    | CEL |
| 105 | Bruce4                     | GSM258655    | CEL |
| 104 | C2C12                      | GSM258690    | CEL |
| 103 | C2C12                      | GSM258689    | CEL |
| 102 | NH3T3                      | GSM258730    | CEL |
| 101 | NH3T3                      | GSM258729    | CEL |
| 100 | 3T3-L1                     | GSM258610    | CEL |
| 99  | 3T3-L1                     | GSM258609    | CEL |
| 98  | 10T12                      | GSM258632    | CEL |
| 97  | 10T12                      | GSM258631    | CEL |
| 96  | Osteoblast-d21             | GSM258740    | CEL |
| 95  | Osteoblast-d21             | GSM258739    | CEL |
| 94  | Osteoblast-d14             | GSM258738    | CEL |
| 93  | Osteoblast-d14             | GSM258737    | CEL |
| 92  | Osteoblast-d5              | GSM258742    | CEL |
| 91  | Osteoblast-d5              | GSM258741    | CEL |
| 90  | Chondrocytes               | GSM266741    | CEL |
| 89  | Chondrocytes               | GSM266740    | CEL |
| 88  | Nat Helper cell            | GSM465594    | CEL |
| 87  | Nat Helper cell            | GSM465593    | CEL |
| 86  | Tt cell                    | GSM465596    | CEL |
| 85  | MS-1                       | GSM234692    | CEL |
| 84  | Lymph-endo-cells           | GSM143704    | CEL |
| 83  | PP-FDC                     | GSM481977    | CEL |
| 82  | PP-FDC                     | GSM481978    | CEL |
| 81  | PP-FDC                     | GSM481976    | CEL |
| 80  | PP-FDC                     | GSM481975    | CEL |
| 79  | E-LY                       | RMLNDC002001 | CEL |
| 78  | Follicular-Bcells          | GSM258664    | CEL |
| 77  | Follicular-Bcells          | GSM258663    | CEL |
| 76  | MZ-Bcell                   | GSM258627    | CEL |
| 75  | MZ-Bcell                   | GSM258621    | CEL |
| 74  | BAF3                       | GSM258620    | CEL |
| 73  | BAF3                       | GSM258619    | CEL |
| 72  | Tregs                      | GSM258778    | CEL |
| 71  | Tregs                      | GSM258777    | CEL |
| 70  | T-cells-CD8+               | GSM258776    | CEL |
| 69  | T-cells-CD8+               | GSM258775    | CEL |
| 68  | T-cells-CD4+               | GSM258774    | CEL |
| 67  | T-cells-CD4+               | GSM258773    | CEL |
| 66  | Thymocyte-DN               | GSM465595    | CEL |
| 65  | Osteoclasts                | GSM258743    | CEL |
| 64  | Osteoclasts                | GSM258744    | CEL |
| 63  | Microglia                  | GSM258721    | CEL |
| 62  | Microglia                  | GSM258721    | CEL |
| 61  | PM-M-PS-7h                 | GSM258706    | CEL |
| 60  | PM-M-PS-7h                 | GSM258705    | CEL |
| 59  | PM-M-PS-6h                 | GSM258702    | CEL |
| 58  | PM-M-PS-6h                 | GSM258701    | CEL |
| 57  | PM-M-PS-6h                 | GSM258699    | CEL |
| 56  | PM-M-PS-6h                 | GSM258694    | CEL |
| 55  | PM-M-PS-6h                 | GSM258694    | CEL |
| 54  | PM-M-PS-6h                 | GSM258694    | CEL |
| 53  | PM-M-PS-6h                 | GSM258694    | CEL |
| 52  | PM-M-PS-6h                 | GSM258694    | CEL |
| 51  | PM-M-PS-6h                 | GSM258694    | CEL |
| 50  | CD8a-DC                    | GSM258647    | CEL |
| 49  | CD8a-DC                    | GSM258646    | CEL |
| 48  | CD8a+DC                    | GSM258646    | CEL |
| 47  | NK-cells                   | GSM258732    | CEL |
| 46  | NK-cells                   | GSM258731    | CEL |
| 45  | Mast-cells-IgE+Ad          | GSM258718    | CEL |
| 44  | Mast-cells-IgE+Ad          | GSM258717    | CEL |
| 43  | Mast-cells-IgE             | GSM258714    | CEL |
| 42  | Mast-cells-IgE             | GSM258713    | CEL |
| 41  | Mast-cells                 | GSM258712    | CEL |
| 40  | Mast-cells                 | GSM258711    | CEL |
| 39  | Granulocytes               | GSM258668    | CEL |
| 38  | Granulocytes               | GSM258667    | CEL |
| 37  | GMP                        | GSM258666    | CEL |
| 36  | GMP                        | GSM258665    | CEL |
| 35  | GMP                        | GSM258664    | CEL |
| 34  | GMP                        | GSM258664    | CEL |
| 33  | GMP                        | GSM258672    | CEL |
| 32  | MEP                        | GSM258720    | CEL |
| 31  | MEP                        | GSM258719    | CEL |
| 30  | HSC                        | GSM258770    | CEL |
| 29  | HSC                        | GSM258770    | CEL |
| 28  | Bone marrow                | GSM258628    | CEL |
| 27  | Bone marrow                | GSM258627    | CEL |
| 26  | paneth-cells-GF-1          | GSM116357    | CEL |
| 25  | paneth-cells               | GSM116350    | CEL |
| 24  | paneth-cells               | GSM116359    | CEL |
| 23  | paneth-cells               | GSM318589    | CEL |
| 22  | paneth-cells               | GSM318590    | CEL |
| 21  | Colon-Crypt                | GSM480375    | CEL |
| 20  | Colon-Crypt                | GSM480374    | CEL |
| 19  | Colon-Vill                 | GSM480363    | CEL |
| 18  | Colon-Vill                 | GSM480362    | CEL |
| 17  | Colon-IEC-GF               | GSM349880    | CEL |
| 16  | Colon-IEC-GF               | GSM350375    | CEL |
| 15  | ileum-IEC                  | GSM350376    | CEL |
| 14  | ileum-IEC                  | GSM350371    | CEL |
| 13  | Small-intestine-epithelium | RMINEP002001 | CEL |
| 12  | Small-intestine-epithelium | RMINEP001001 | CEL |
| 11  | FAE-RMP                    | EP002001     | CEL |
| 10  | FAE-RMP                    | EP001001     | CEL |
| 09  | ileum-IEC                  | GSM190797    | CEL |
| 08  | ileum-IEC                  | GSM190796    | CEL |
| 07  | ileum-IEC                  | GSM190795    | CEL |
| 06  | CT-v-M-cells               | GSM190794    | CEL |
| 05  | CT-v-M-cells               | GSM190793    | CEL |
| 04  | PP-M-cells                 | GSM190792    | CEL |
| 03  | PP-M-cells                 | GSM190791    | CEL |
| 02  | PP-M-cells                 | GSM190790    | CEL |
| 01  | PP-M-cells                 | GSM190789    | CEL |



Cluster0253\_intestine-related (8 nodes)

2,714.4  
2,571.6  
2,428.7  
2,285.8  
2,143  
2,000.1  
1,857.2  
1,714.4  
1,571.5  
1,428.6  
1,285.8  
1,142.9  
1,000.1  
857.2  
714.3  
571.5  
428.6  
285.7  
142.9  
0

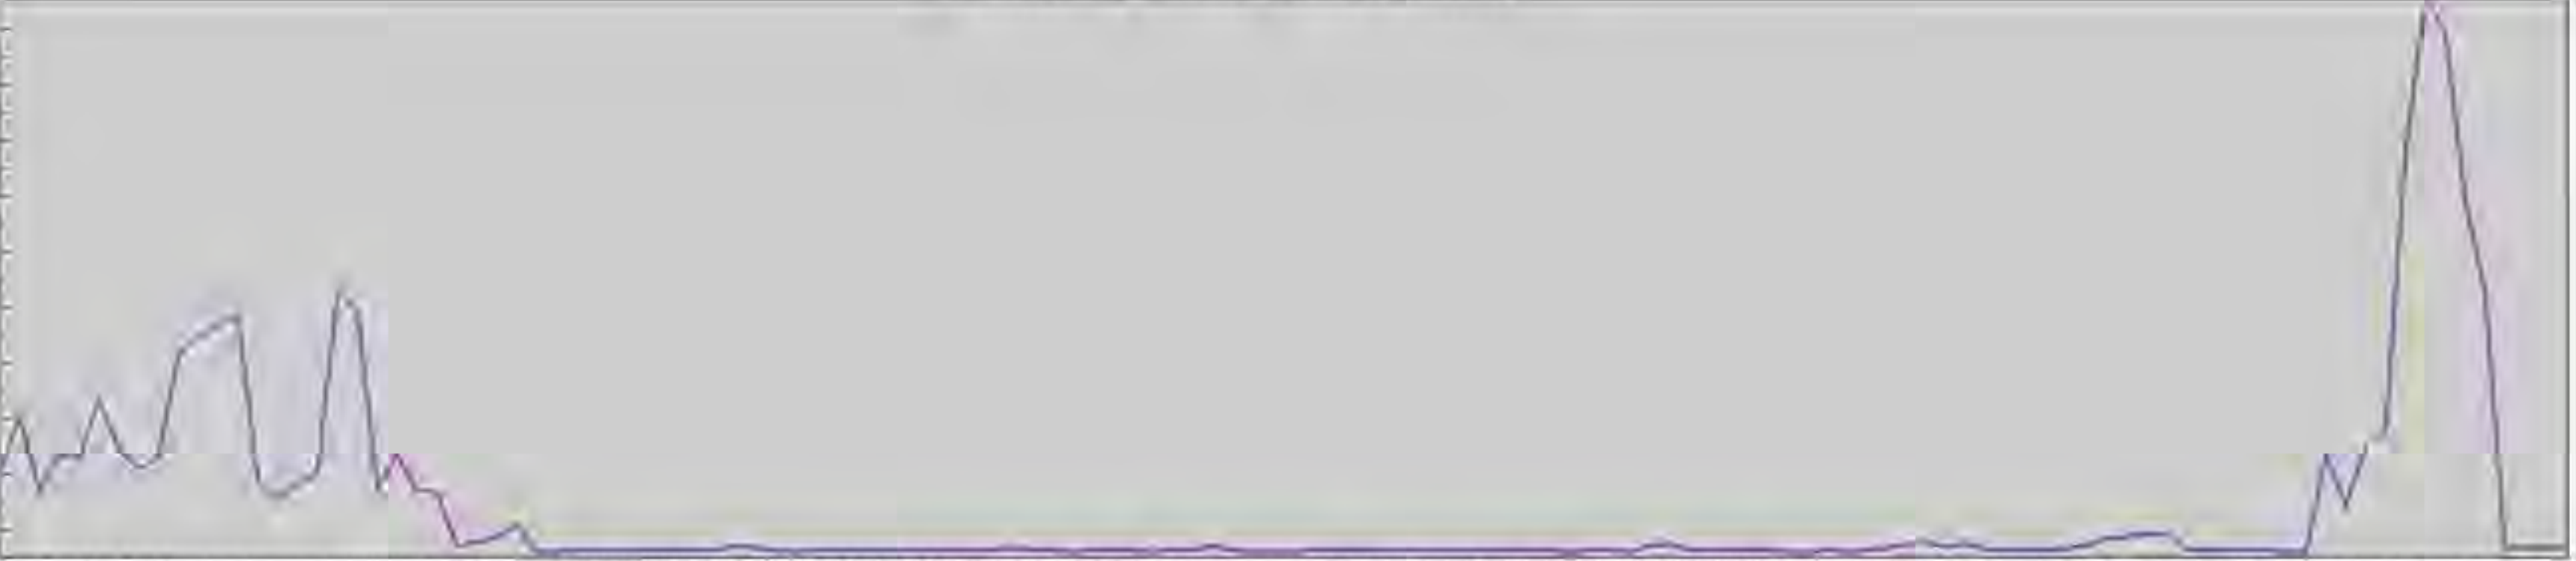

130-NALT GSM289411 CELL  
129-NALT GSM289410 CELL  
128-NALT GSM289409 CELL  
127-NALT GSM289408 CELL  
126-Colon-d9 GSM1988105 CELL  
125-Colon-d9 GSM1988104 CELL  
124-Colon-d9 GSM1988103 CELL  
123-Colon-d4 GSM1988102 CELL  
122-Colon-d4 GSM1988101 CELL  
121-Intestine-large GSM258676 CELL  
120-Intestine-large GSM258675 CELL  
119-Intestine-small GSM258674 CELL  
118-Intestine-small GSM258673 CELL  
117-Lymph-nodes GSM258672 CELL  
116-Lymph-nodes GSM258671 CELL  
115-Spleen GSM258767 CELL  
114-Spleen GSM258766 CELL  
113-Neuro2a GSM258728 CELL  
112-Neuro2a GSM258727 CELL  
111-Astrocytes GSM241898 CELL  
110-mim6 GSM258726 CELL  
109-mim6 GSM258725 CELL  
108-MIMCD3 GSM258724 CELL  
107-MIMCD3 GSM258723 CELL  
106-Bruce4 GSM258656 CELL  
105-Bruce4 GSM258655 CELL  
104-C2C12 GSM258690 CELL  
103-C2C12 GSM258689 CELL  
102-NH3T3 GSM258739 CELL  
101-NH3T3 GSM258738 CELL  
100-3T3-L1 GSM258610 CELL  
99-3T3-L1 GSM258609 CELL  
98-10T12 GSM258632 CELL  
97-10T12 GSM258631 CELL  
96-Osteoblast-d21 GSM258740 CELL  
95-Osteoblast-d21 GSM258739 CELL  
94-Osteoblast-d14 GSM258738 CELL  
93-Osteoblast-d14 GSM258737 CELL  
92-Osteoblast-d5 GSM258742 CELL  
91-Osteoblast-d5 GSM258741 CELL  
90-Chondrocytes GSM266741 CELL  
89-Chondrocytes GSM266740 CELL  
88-Nat Helper cell GSM465594 CELL  
87-Nat Helper cell GSM465593 CELL  
86-TT cell GSM465596 CELL  
85-MS-1 GSM234692 CELL  
84-Lymph-endo-cells GSM143704 CELL  
83-PP-FDC GSM481977 CELL  
82-PP-FDC GSM481978 CELL  
81-PP-FDC GSM481976 CELL  
80-F-LY RMLNDCC003001 CELL  
79-F-LY RMLNDCC003001 CELL  
78-Follicular-Bcells GSM258664 CELL  
77-Follicular-Bcells GSM258663 CELL  
76-MZ-Bcell GSM258627 CELL  
75-MZ-Bcell GSM258621 CELL  
74-BAF3 GSM258620 CELL  
73-BAF3 GSM258619 CELL  
72-Tregs GSM258778 CELL  
71-Tregs GSM258777 CELL  
70-T-cells-CD8+ GSM258776 CELL  
69-T-cells-CD8+ GSM258774 CELL  
68-T-cells-CD4+ GSM258773 CELL  
67-T-cells-CD4+ GSM258773 CELL  
66-Thymocyte-DN GSM465595 CELL  
65-Osteoclasts GSM258743 CELL  
64-Osteoclasts GSM258743 CELL  
63-Microglia GSM258721 CELL  
62-Microglia GSM258721 CELL  
61-PM-M-PS-7h GSM268706 CELL  
60-PM-M-PS-7h GSM268705 CELL  
59-PM-M-PS-6h GSM258702 CELL  
58-PM-M-PS-6h GSM258701 CELL  
57-BMM-LPS-6h GSM258699 CELL  
56-BMM-LPS-6h GSM258699 CELL  
55-BMM-LPS-6h GSM258699 CELL  
54-BMM-LPS-6h GSM258699 CELL  
53-Iasmacryoid-DC GSM258650 CELL  
52-Iasmacryoid-DC GSM258649 CELL  
51-CD8a-DC GSM258647 CELL  
50-CD8a-DC GSM258647 CELL  
49-CD8a+DC GSM258646 CELL  
48-CD8a+DC GSM258646 CELL  
47-NK-cells GSM258732 CELL  
46-NK-cells GSM258731 CELL  
45-Mast-cells-IgE+Ad GSM258718 CELL  
44-Mast-cells-IgE+Ad GSM258717 CELL  
43-Mast-cells-IgE GSM258714 CELL  
42-Mast-cells-IgE GSM258713 CELL  
41-Mast-cells GSM258712 CELL  
40-Granulocytes GSM258667 CELL  
39-Granulocytes GSM258667 CELL  
38-GMP GSM258666 CELL  
37-GMP GSM258666 CELL  
36-GMP GSM258666 CELL  
35-CMP GSM258642 CELL  
34-CMP GSM258641 CELL  
33-MEP GSM258720 CELL  
32-MEP GSM258719 CELL  
31-HESC GSM258770 CELL  
30-HESC GSM258769 CELL  
29-Bone marrow GSM258628 CELL  
28-Bone marrow GSM258627 CELL  
27-paneth-cells-GF GSM116358 CELL  
26-paneth-cells-GF GSM116357 CELL  
25-paneth-cells GSM116350 CELL  
24-paneth-cells GSM116359 CELL  
23-paneth-cells GSM318589 CELL  
22-paneth-cells GSM318590 CELL  
21-Colon-Crypt GSM480375 cel  
20-Colon-Crypt GSM480374 cel  
19-Colon-Vill GSM480363 cel  
18-Colon-Vill GSM480362 cel  
17-Colon-IEC-GF GSM349880 CELL  
16-Colon-IEC-GF GSM350375 CELL  
15-Ileum-IEC-GF GSM350376 CELL  
14-Ileum-IEC GSM350371 CELL  
13-Small-intestine-epithelium RMINEP002001 CELL  
12-Small-intestine-epithelium RMINEP001001 CELL  
11-FAE-RMPYEP002001 CELL  
10-FAE-RMPYEP001001 CELL  
09-Ileum-IEC GSM190797 CELL  
08-Ileum-IEC GSM190796 CELL  
07-Ileum-IEC GSM190795 CELL  
06-CT-v-M-cells GSM190794 CELL  
05-CT-v-M-cells GSM190793 CELL  
04-CT-v-M-cells GSM190792 CELL  
03-PP-M-cells GSM190791 CELL  
02-PP-M-cells GSM190790 CELL  
01-PP-M-cells GSM190789 CELL



## Cluster0254\_Uncertain-low in many (8 nodes)

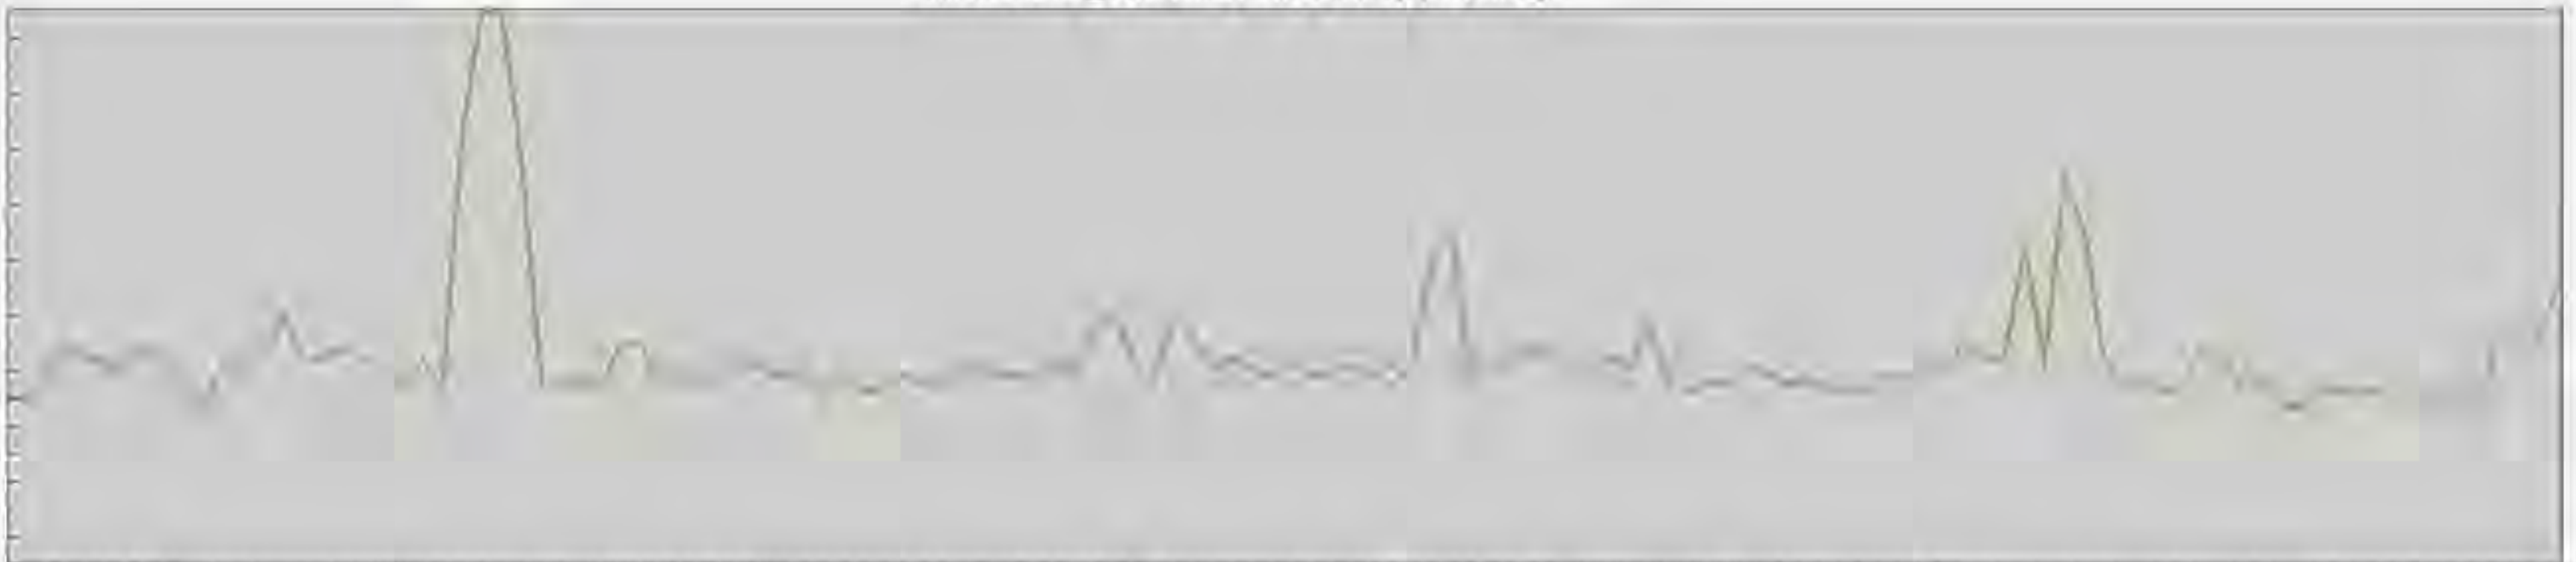

|     |                            |              |     |
|-----|----------------------------|--------------|-----|
| 01  | PP-M-cells                 | GSM190789    | CEL |
| 02  | PP-M-cells                 | GSM190790    | CEL |
| 03  | PP-M-cells                 | GSM190791    | CEL |
| 04  | CT-v-M-cells               | GSM190792    | CEL |
| 05  | CT-v-M-cells               | GSM190793    | CEL |
| 06  | CT-v-M-cells               | GSM190794    | CEL |
| 07  | Ileum-IEC                  | GSM190795    | CEL |
| 08  | Ileum-IEC                  | GSM190796    | CEL |
| 09  | Ileum-IEC                  | GSM190797    | CEL |
| 10  | FAE-RMP                    | GSM190798    | CEL |
| 11  | FAE-RMP                    | GSM190799    | CEL |
| 12  | Small-intestine-epithelium | RMINEP001001 | CEL |
| 13  | Small-intestine-epithelium | RMINEP002001 | CEL |
| 14  | Ileum-IEC                  | GSM350371    | CEL |
| 15  | Ileum-IEC                  | GSM350375    | CEL |
| 16  | Colon-Vill                 | GSM480362    | cel |
| 17  | Colon-Vill                 | GSM480363    | cel |
| 18  | Colon-Vill                 | GSM480364    | cel |
| 19  | Colon-Crypt                | GSM480374    | cel |
| 20  | Colon-Crypt                | GSM480375    | cel |
| 21  | Colon-Crypt                | GSM480376    | cel |
| 22  | Paneth-cells               | GSM318589    | CEL |
| 23  | Paneth-cells               | GSM318590    | CEL |
| 24  | Paneth-cells               | GSM116359    | CEL |
| 25  | Paneth-cells               | GSM116360    | CEL |
| 26  | Paneth-cells               | GSM116357    | CEL |
| 27  | Paneth-cells               | GSM116358    | CEL |
| 28  | Bone marrow                | GSM258627    | CEL |
| 29  | Bone marrow                | GSM258628    | CEL |
| 30  | HSC                        | GSM258770    | CEL |
| 31  | HSC                        | GSM258771    | CEL |
| 32  | MEP                        | GSM258772    | CEL |
| 33  | MEP                        | GSM258773    | CEL |
| 34  | MEP                        | GSM258774    | CEL |
| 35  | GMP                        | GSM258642    | CEL |
| 36  | GMP                        | GSM258643    | CEL |
| 37  | GMP                        | GSM258665    | CEL |
| 38  | GMP                        | GSM258666    | CEL |
| 39  | Granulocytes               | GSM258667    | CEL |
| 40  | Mast-cells                 | GSM258711    | CEL |
| 41  | Mast-cells                 | GSM258712    | CEL |
| 42  | Mast-cells                 | GSM258713    | CEL |
| 43  | Mast-cells                 | GSM258714    | CEL |
| 44  | Mast-cells-IgE+Ad          | GSM258718    | CEL |
| 45  | Mast-cells-IgE+Ad          | GSM258719    | CEL |
| 46  | NK-cells                   | GSM258731    | CEL |
| 47  | NK-cells                   | GSM258732    | CEL |
| 48  | CD8a+DC                    | GSM258646    | CEL |
| 49  | CD8a+DC                    | GSM258647    | CEL |
| 50  | CD8a-DC                    | GSM258647    | CEL |
| 51  | CD8a-DC                    | GSM258648    | CEL |
| 52  | Plasmacytoid-DC            | GSM258649    | CEL |
| 53  | Iasmacytoid-DC             | GSM258650    | CEL |
| 54  | BMM                        | GSM258694    | CEL |
| 55  | BMM                        | GSM258694    | CEL |
| 56  | BMM-LPS-6h                 | GSM258700    | CEL |
| 57  | BMM-LPS-6h                 | GSM258701    | CEL |
| 58  | BMM-LPS-7h                 | GSM258702    | CEL |
| 59  | BMM-LPS-7h                 | GSM258703    | CEL |
| 60  | BMM-LPS-7h                 | GSM258706    | CEL |
| 61  | BMM-LPS-7h                 | GSM258706    | CEL |
| 62  | Microglia                  | GSM258721    | CEL |
| 63  | Microglia                  | GSM258721    | CEL |
| 64  | Osteoclasts                | GSM258743    | CEL |
| 65  | Osteoclasts                | GSM258744    | CEL |
| 66  | Thymocyte-DN               | GSM465595    | CEL |
| 67  | T-cells-CD4+               | GSM258773    | CEL |
| 68  | T-cells-CD4+               | GSM258774    | CEL |
| 69  | T-cells-CD8+               | GSM258775    | CEL |
| 70  | T-cells-CD8+               | GSM258776    | CEL |
| 71  | Tregs                      | GSM258778    | CEL |
| 72  | Tregs                      | GSM258778    | CEL |
| 73  | BAF3                       | GSM258619    | CEL |
| 74  | BAF3                       | GSM258620    | CEL |
| 75  | MZ-Bcell                   | GSM258621    | CEL |
| 76  | MZ-Bcell                   | GSM258622    | CEL |
| 77  | Follicular-Bcells          | GSM258664    | CEL |
| 78  | Follicular-Bcells          | GSM258664    | CEL |
| 79  | F-LY-RMLNDC002001          | CEL          |     |
| 80  | F-LY-RMLNDC003001          | CEL          |     |
| 81  | PP-FDC                     | GSM481978    | CEL |
| 82  | PP-FDC                     | GSM481978    | CEL |
| 83  | PP-FDC                     | GSM481978    | CEL |
| 84  | Lymph-endo-cells           | GSM143704    | CEL |
| 85  | MS-1                       | GSM234692    | CEL |
| 86  | LT cell                    | GSM465596    | CEL |
| 87  | Nat Helper cell            | GSM465593    | CEL |
| 88  | Nat Helper cell            | GSM465594    | CEL |
| 89  | Chondrocytes               | GSM266741    | CEL |
| 90  | Chondrocytes               | GSM266741    | CEL |
| 91  | Osteoblast-d5              | GSM258741    | CEL |
| 92  | Osteoblast-d5              | GSM258742    | CEL |
| 93  | Osteoblast-d14             | GSM258737    | CEL |
| 94  | Osteoblast-d14             | GSM258738    | CEL |
| 95  | Osteoblast-d21             | GSM258740    | CEL |
| 96  | Osteoblast-d21             | GSM258739    | CEL |
| 97  | 10T1/2                     | GSM258631    | CEL |
| 98  | 10T1/2                     | GSM258631    | CEL |
| 99  | 3T3-L1                     | GSM258610    | CEL |
| 100 | 3T3-L1                     | GSM258610    | CEL |
| 101 | NH3T3                      | GSM258739    | CEL |
| 102 | NH3T3                      | GSM258739    | CEL |
| 103 | C2C12                      | GSM258629    | CEL |
| 104 | Bruce4                     | GSM258690    | CEL |
| 105 | Bruce4                     | GSM258690    | CEL |
| 110 | mim6                       | GSM258725    | CEL |
| 109 | mim6                       | GSM258725    | CEL |
| 108 | MIMCD3                     | GSM258723    | CEL |
| 107 | MIMCD3                     | GSM258723    | CEL |
| 111 | Lymph-nodes                | GSM258691    | CEL |
| 110 | Lymph-nodes                | GSM258691    | CEL |
| 115 | Spleen                     | GSM258768    | CEL |
| 114 | Spleen                     | GSM258767    | CEL |
| 113 | Neuro2a                    | GSM258728    | CEL |
| 112 | Neuro2a                    | GSM258727    | CEL |
| 117 | Lymph-nodes                | GSM258675    | CEL |
| 116 | Lymph-nodes                | GSM258675    | CEL |
| 119 | Intestine-small            | GSM258677    | CEL |
| 118 | Intestine-small            | GSM258677    | CEL |
| 120 | Intestine-large            | GSM258679    | CEL |
| 121 | Intestine-large            | GSM258676    | CEL |
| 122 | Colon-d4                   | GSM198101    | CEL |
| 123 | Colon-d4                   | GSM198102    | CEL |
| 124 | Colon-d9                   | GSM198103    | CEL |
| 125 | Colon-d9                   | GSM198104    | CEL |
| 126 | Colon-d9                   | GSM198105    | CEL |
| 127 | NALT                       | GSM289408    | CEL |
| 128 | NALT                       | GSM289409    | CEL |
| 129 | NALT                       | GSM289410    | CEL |
| 130 | NALT                       | GSM289411    | CEL |







Cluster0256\_Mesenchyme-related/extracellular matrix (8 nodes)

2,544.4  
2,410.6  
2,276.6  
2,142.7  
2,008.8  
1,874.8  
1,740.9  
1,607  
1,473.1  
1,339.2  
1,205.3  
1,071.3  
937.4  
803.5  
669.6  
535.7  
401.8  
267.8  
133.9  
0

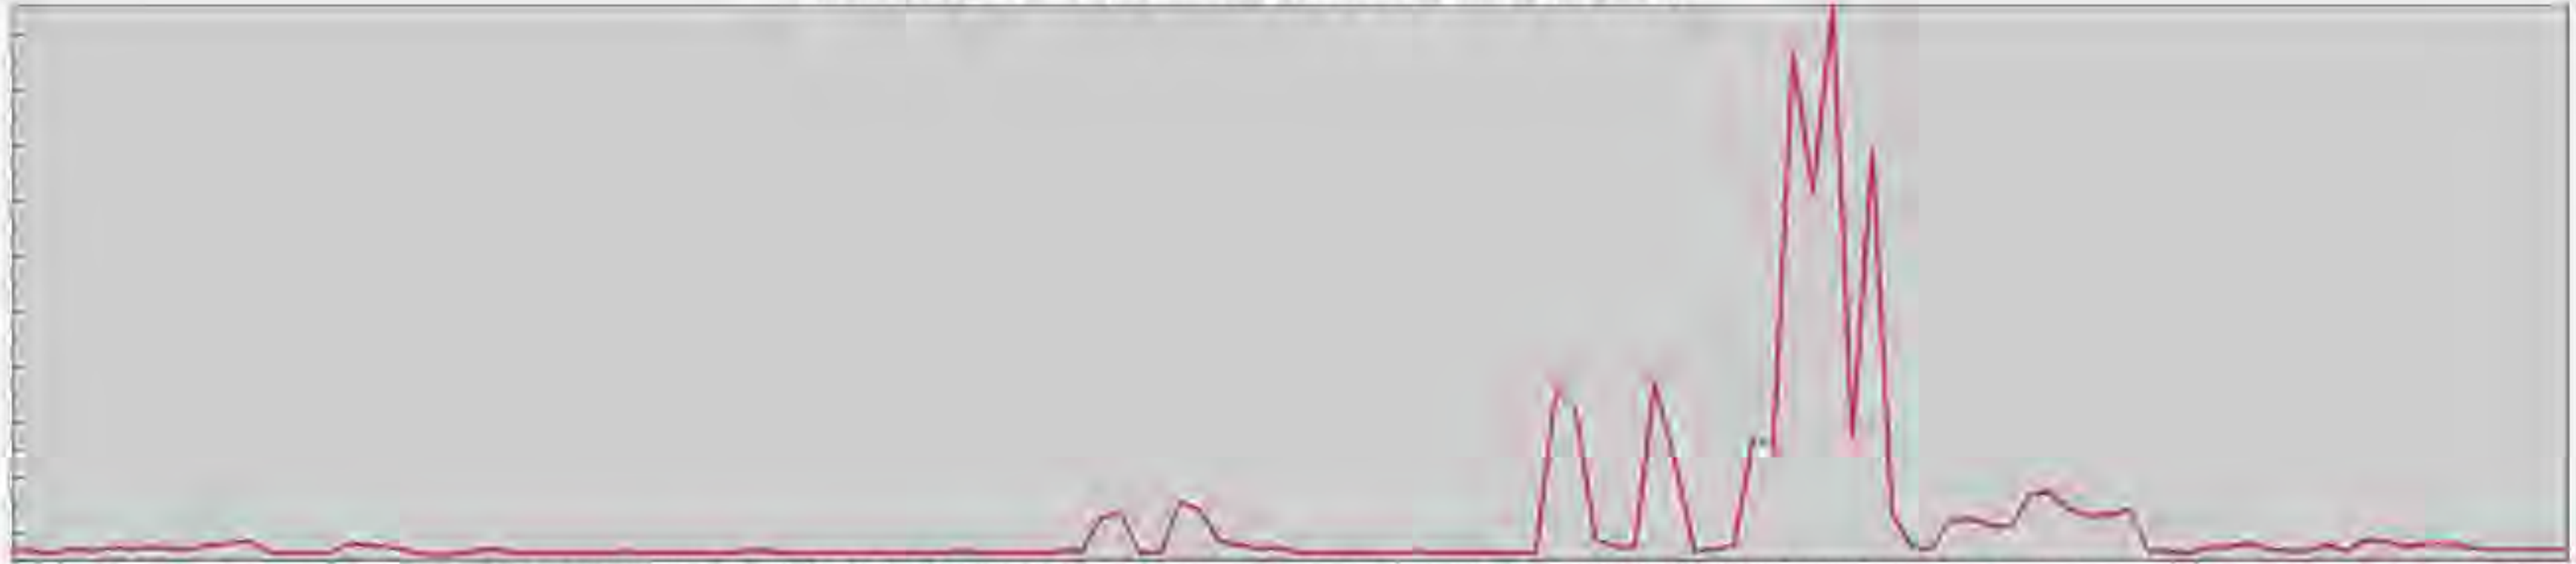

01-PP-M-cells\_GSM190789.CEL  
02-PP-M-cells\_GSM190790.CEL  
03-PP-M-cells\_GSM190791.CEL  
04-CT-V-M-cells\_GSM190792.CEL  
05-CT-V-M-cells\_GSM190793.CEL  
06-CT-V-M-cells\_GSM190794.CEL  
07-Ileum-IEC\_GSM190795.CEL  
08-Ileum-IEC\_GSM190796.CEL  
09-Ileum-IEC\_GSM190797.CEL  
10-FAE-RMPYEP001001.CEL  
11-FAE-RMPYEP002001.CEL  
12-Small-intestine-epithelium\_RMINEP001001.CEL  
13-Small-intestine-epithelium\_RMINEP002001.CEL  
14-Ileum-IEC\_GSM350371.CEL  
15-Ileum-IEC\_GSM350375.CEL  
16-Colon-IEC-Gf\_GSM349880.CEL  
17-Colon-IEC-Gf\_GSM350375.CEL  
18-Colon-Vill\_GSM480362.CEL  
19-Colon-Vill\_GSM480363.CEL  
20-Colon-Crypt\_GSM480374.CEL  
21-Colon-Crypt\_GSM480375.CEL  
22-Paneth-cells\_GSM318590.CEL  
23-Paneth-cells\_GSM318589.CEL  
24-Paneth-cells\_GSM116359.CEL  
25-Paneth-cells\_GSM116359.CEL  
26-Paneth-cells-Gf-1\_GSM116357.CEL  
27-Paneth-cells-Gf-1\_GSM116357.CEL  
28-Bone marrow\_GSM258627.CEL  
29-Bone marrow\_GSM258627.CEL  
30-NALT\_GSM289411.CEL  
31-NALT\_GSM289410.CEL  
32-NALT\_GSM289409.CEL  
33-NALT\_GSM289408.CEL  
34-Colon-d9\_GSM1988105.CEL  
35-Colon-d9\_GSM1988104.CEL  
36-Colon-d9\_GSM1988103.CEL  
37-Colon-d4\_GSM1988102.CEL  
38-Colon-d4\_GSM1988101.CEL  
39-Intestine-large\_GSM258676.CEL  
40-Intestine-large\_GSM258675.CEL  
41-Intestine-small\_GSM258678.CEL  
42-Intestine-small\_GSM258677.CEL  
43-Spleen\_GSM258728.CEL  
44-Spleen\_GSM258728.CEL  
45-Neuro2a\_GSM241898.CEL  
46-Neuro2a\_GSM241898.CEL  
47-Astrocytes\_GSM241898.CEL  
48-mim6\_GSM258726.CEL  
49-mim6\_GSM258725.CEL  
50-mim6\_GSM258725.CEL  
51-MIMCD3\_GSM258724.CEL  
52-MIMCD3\_GSM258723.CEL  
53-Bruce4\_GSM258656.CEL  
54-Bruce4\_GSM258656.CEL  
55-C2C12\_GSM258690.CEL  
56-C2C12\_GSM258689.CEL  
57-NH3T3\_GSM258730.CEL  
58-NH3T3\_GSM258729.CEL  
59-3T3-L1\_GSM258610.CEL  
60-3T3-L1\_GSM258609.CEL  
61-3T3-L1\_GSM258609.CEL  
62-10T12\_GSM258632.CEL  
63-10T12\_GSM258631.CEL  
64-Osteoblast-d21\_GSM258740.CEL  
65-Osteoblast-d21\_GSM258739.CEL  
66-Osteoblast-d14\_GSM258738.CEL  
67-Osteoblast-d14\_GSM258737.CEL  
68-Osteoblast-d5\_GSM258742.CEL  
69-Osteoblast-d5\_GSM258741.CEL  
70-Chondrocytes\_GSM266741.CEL  
71-Chondrocytes\_GSM266740.CEL  
72-Nat Helper cell\_GSM465594.CEL  
73-Nat Helper cell\_GSM465593.CEL  
74-TT cell\_GSM465596.CEL  
75-MS-1\_GSM234692.CEL  
76-Lymph-endo-cells\_GSM143704.CEL  
77-Lymph-endo-cells\_GSM481977.CEL  
78-Lymph-endo-cells\_GSM481978.CEL  
79-Lymph-endo-cells\_GSM481978.CEL  
80-Lymph-endo-cells\_GSM481978.CEL  
81-PP-FDC\_GSM481976.CEL  
82-PP-FDC\_GSM481976.CEL  
83-F-LY-RMLNDC002001.CEL  
84-F-LY-RMLNDC002001.CEL  
85-Follicular-Bcells\_GSM258664.CEL  
86-Follicular-Bcells\_GSM258663.CEL  
87-MZ-Bcell\_GSM258622.CEL  
88-MZ-Bcell\_GSM258621.CEL  
89-BAF3\_GSM258620.CEL  
90-BAF3\_GSM258619.CEL  
91-Tregs\_GSM258778.CEL  
92-Tregs\_GSM258777.CEL  
93-T-cells-CD8+GSM258776.CEL  
94-T-cells-CD8+GSM258775.CEL  
95-T-cells-CD4+GSM258774.CEL  
96-T-cells-CD4+GSM258773.CEL  
97-Thymocyte-DN\_GSM465595.CEL  
98-Osteoclasts\_GSM258743.CEL  
99-Microglia\_GSM258721.CEL  
100-Microglia\_GSM258721.CEL  
101-MM-LPS-7h\_GSM258706.CEL  
102-MM-LPS-7h\_GSM258706.CEL  
103-MM-LPS-6h\_GSM258702.CEL  
104-MM-LPS-6h\_GSM258702.CEL  
105-MM-LPS-6h\_GSM258699.CEL  
106-MM-LPS-6h\_GSM258699.CEL  
107-MM-LPS-6h\_GSM258699.CEL  
108-MM-LPS-6h\_GSM258699.CEL  
109-MM-LPS-6h\_GSM258699.CEL  
110-MM-LPS-6h\_GSM258699.CEL  
111-MM-LPS-6h\_GSM258699.CEL  
112-MM-LPS-6h\_GSM258699.CEL  
113-MM-LPS-6h\_GSM258699.CEL  
114-MM-LPS-6h\_GSM258699.CEL  
115-MM-LPS-6h\_GSM258699.CEL  
116-MM-LPS-6h\_GSM258699.CEL  
117-MM-LPS-6h\_GSM258699.CEL  
118-MM-LPS-6h\_GSM258699.CEL  
119-MM-LPS-6h\_GSM258699.CEL  
120-MM-LPS-6h\_GSM258699.CEL  
121-MM-LPS-6h\_GSM258699.CEL  
122-MM-LPS-6h\_GSM258699.CEL  
123-MM-LPS-6h\_GSM258699.CEL  
124-MM-LPS-6h\_GSM258699.CEL  
125-MM-LPS-6h\_GSM258699.CEL  
126-MM-LPS-6h\_GSM258699.CEL  
127-MM-LPS-6h\_GSM258699.CEL  
128-MM-LPS-6h\_GSM258699.CEL  
129-MM-LPS-6h\_GSM258699.CEL  
130-MM-LPS-6h\_GSM258699.CEL



Cluster0257\_Mesenchyme-related/extracellular matrix (8 nodes)

1,243.3  
1,177.9  
1,112.5  
1,047  
981.6  
916.1  
850.7  
785.3  
719.8  
654.4  
588.9  
523.5  
458.1  
392.6  
327.2  
261.8  
196.3  
130.9  
65.4  
0

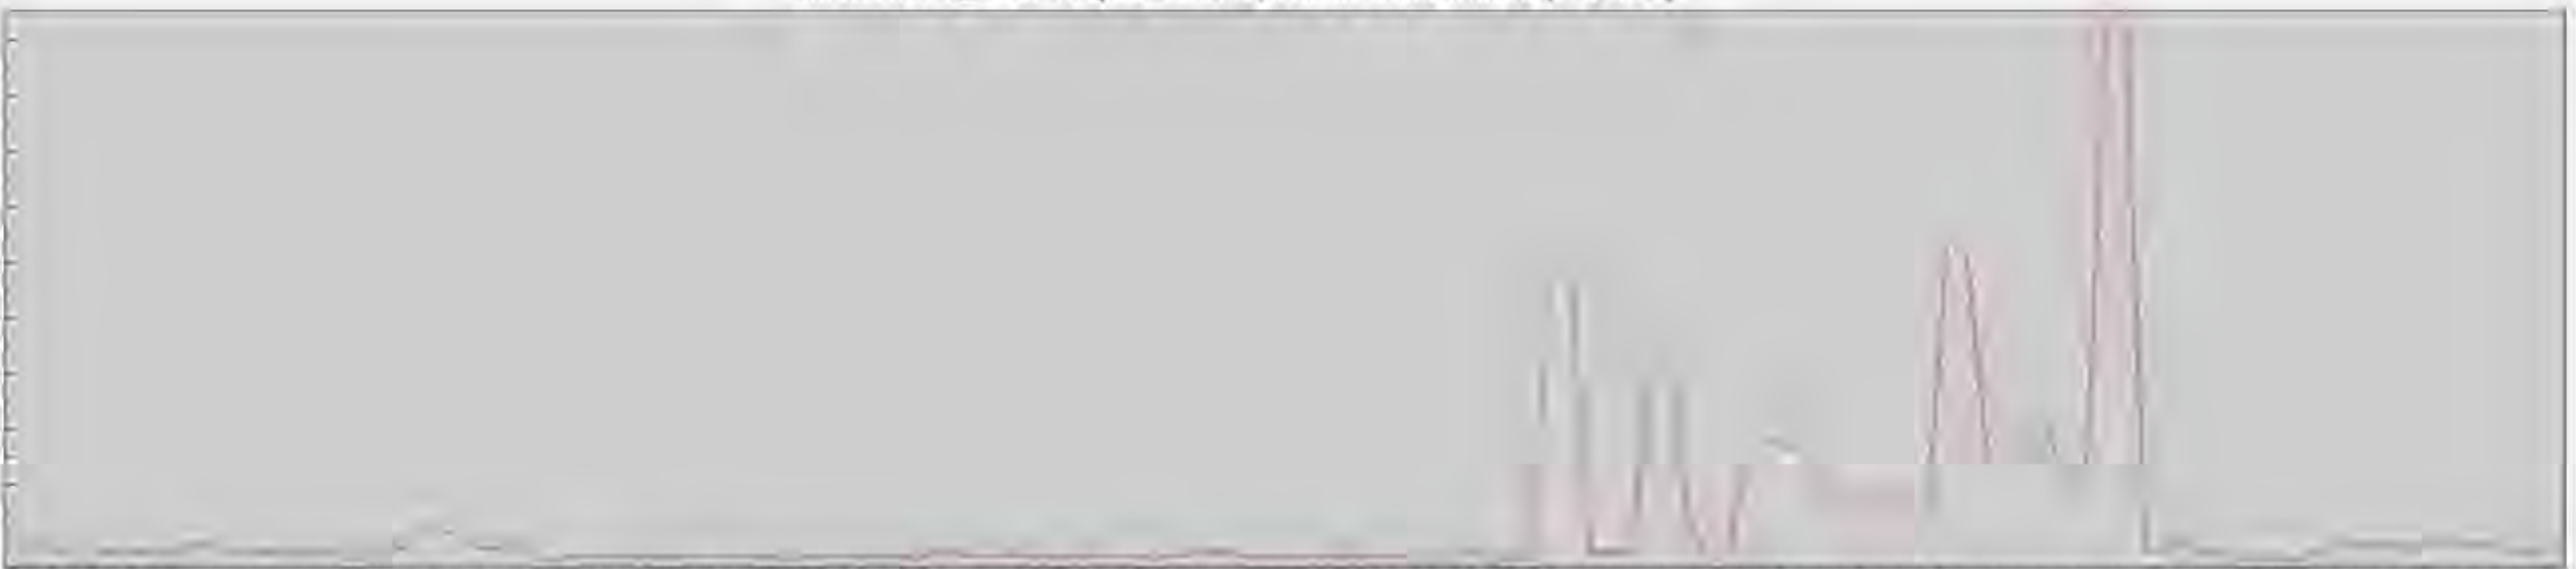

| Cell Type            | GSM ID     | Expression Value |
|----------------------|------------|------------------|
| 30-NALT              | GSM2899411 | CEL              |
| 139-NALT             | GSM2899410 | CEL              |
| 138-NALT             | GSM2899409 | CEL              |
| 137-NALT             | GSM2899408 | CEL              |
| 136-Color-d9         | GSM1988104 | CEL              |
| 135-Color-d9         | GSM1988103 | CEL              |
| 134-Color-d4         | GSM1988102 | CEL              |
| 133-Color-d4         | GSM1988101 | CEL              |
| 132-Intestine-large  | GSM258676  | CEL              |
| 131-Intestine-large  | GSM258675  | CEL              |
| 130-Intestine-large  | GSM258674  | CEL              |
| 129-Intestine-small  | GSM258673  | CEL              |
| 128-Intestine-small  | GSM258672  | CEL              |
| 127-Lymph-nodes      | GSM258671  | CEL              |
| 126-Spleen           | GSM258670  | CEL              |
| 125-Spleen           | GSM258669  | CEL              |
| 124-Neuro2a          | GSM2418998 | CEL              |
| 123-Neuro2a          | GSM2418997 | CEL              |
| 122-Astrocytes       | GSM2418996 | CEL              |
| 121-Astrocytes       | GSM2418995 | CEL              |
| 120-mimb             | GSM258726  | CEL              |
| 119-mimb             | GSM258725  | CEL              |
| 118-MIMCD3           | GSM258724  | CEL              |
| 117-MIMCD3           | GSM258723  | CEL              |
| 116-Bruc4            | GSM258690  | CEL              |
| 115-Bruc4            | GSM258689  | CEL              |
| 114-C2C12            | GSM258688  | CEL              |
| 113-C2C12            | GSM258687  | CEL              |
| 112-NH3T3            | GSM258730  | CEL              |
| 111-NH3T3            | GSM258729  | CEL              |
| 110-3T3-L1           | GSM258610  | CEL              |
| 109-3T3-L1           | GSM258609  | CEL              |
| 108-10T1/2           | GSM258632  | CEL              |
| 107-10T1/2           | GSM258631  | CEL              |
| 99-Osteoblast-d21    | GSM258740  | CEL              |
| 98-Osteoblast-d21    | GSM258739  | CEL              |
| 97-Osteoblast-d14    | GSM258738  | CEL              |
| 96-Osteoblast-d14    | GSM258737  | CEL              |
| 95-Osteoblast-d5     | GSM258742  | CEL              |
| 94-Osteoblast-d5     | GSM258741  | CEL              |
| 93-Chondrocytes      | GSM2586741 | CEL              |
| 92-Chondrocytes      | GSM2586740 | CEL              |
| 91-Nat Helper cell   | GSM465594  | CEL              |
| 90-Nat Helper cell   | GSM465593  | CEL              |
| 89-LT cell           | GSM465596  | CEL              |
| 88-LT cell           | GSM465595  | CEL              |
| 87-MS-1              | GSM234692  | CEL              |
| 86-Lymph-endo-cells  | GSM143704  | CEL              |
| 85-Lymph-endo-cells  | GSM481977  | CEL              |
| 84-Lymph-endo-cells  | GSM481978  | CEL              |
| 83-Lymph-endo-cells  | GSM481979  | CEL              |
| 82-Lymph-endo-cells  | GSM481976  | CEL              |
| 81-Lymph-endo-cells  | GSM481977  | CEL              |
| 80-Lymph-endo-cells  | GSM481978  | CEL              |
| 79-Lymph-endo-cells  | GSM481979  | CEL              |
| 78-Follicular-Bcells | GSM258664  | CEL              |
| 77-Follicular-Bcells | GSM258663  | CEL              |
| 76-MZ-Bcell          | GSM258622  | CEL              |
| 75-MZ-Bcell          | GSM258621  | CEL              |
| 74-BAF3              | GSM258620  | CEL              |
| 73-BAF3              | GSM258619  | CEL              |
| 72-Tregs             | GSM258778  | CEL              |
| 71-Tregs             | GSM258777  | CEL              |
| 70-T-cells-CD8+      | GSM258776  | CEL              |
| 69-T-cells-CD8+      | GSM258775  | CEL              |
| 68-T-cells-CD4+      | GSM258774  | CEL              |
| 67-T-cells-CD4+      | GSM258773  | CEL              |
| 66-Thymocyte-DN      | GSM465595  | CEL              |
| 65-Osteoclasts       | GSM258743  | CEL              |
| 64-Osteoclasts       | GSM258744  | CEL              |
| 63-Microglia         | GSM258721  | CEL              |
| 62-Microglia         | GSM258721  | CEL              |
| 61-MM-LPS-7h         | GSM258706  | CEL              |
| 60-MM-LPS-7h         | GSM258706  | CEL              |
| 59-MM-LPS-6h         | GSM258702  | CEL              |
| 58-MM-LPS-6h         | GSM258701  | CEL              |
| 57-MM-LPS-6h         | GSM258699  | CEL              |
| 56-MM-LPS-6h         | GSM258699  | CEL              |
| 55-MM-LPS-6h         | GSM258694  | CEL              |
| 54-MM-LPS-6h         | GSM258694  | CEL              |
| 53-Plasmacytoid-DC   | GSM258650  | CEL              |
| 52-Plasmacytoid-DC   | GSM258649  | CEL              |
| 51-CD8a-DC           | GSM258647  | CEL              |
| 50-CD8a-DC           | GSM258647  | CEL              |
| 49-CD8a+DC           | GSM258646  | CEL              |
| 48-CD8a+DC           | GSM258646  | CEL              |
| 47-NK-cells          | GSM258732  | CEL              |
| 46-NK-cells          | GSM258731  | CEL              |
| 45-Mast-cells-IgE+Ad | GSM258719  | CEL              |
| 44-Mast-cells-IgE+Ad | GSM258717  | CEL              |
| 43-Mast-cells-IgE    | GSM258714  | CEL              |
| 42-Mast-cells-IgE    | GSM258713  | CEL              |
| 41-Mast-cells        | GSM258712  | CEL              |
| 40-Granulocytes      | GSM258667  | CEL              |
| 39-Granulocytes      | GSM258667  | CEL              |
| 38-GMP               | GSM258666  | CEL              |
| 37-GMP               | GSM258666  | CEL              |
| 36-GMP               | GSM258664  | CEL              |
| 35-GMP               | GSM258664  | CEL              |
| 34-MEP               | GSM258720  | CEL              |
| 33-MEP               | GSM258719  | CEL              |
| 32-MEP               | GSM258719  | CEL              |
| 31-HSC               | GSM258770  | CEL              |
| 30-HSC               | GSM258770  | CEL              |
| 29-Bone marrow       | GSM258628  | CEL              |
| 28-Bone marrow       | GSM258627  | CEL              |
| 27-paneth-cells-GF   | GSM116357  | CEL              |
| 26-paneth-cells-GF   | GSM116357  | CEL              |
| 25-paneth-cells      | GSM116350  | CEL              |
| 24-paneth-cells      | GSM116359  | CEL              |
| 23-paneth-cells      | GSM318589  | CEL              |
| 22-paneth-cells      | GSM318590  | CEL              |
| 21-paneth-cells      | GSM480375  | CEL              |
| 20-paneth-cells      | GSM480374  | CEL              |
| 19-paneth-cells      | GSM480363  | CEL              |
| 18-paneth-cells      | GSM480362  | CEL              |
| 17-paneth-cells      | GSM349880  | CEL              |
| 16-paneth-cells      | GSM350375  | CEL              |
| 15-paneth-cells      | GSM350376  | CEL              |
| 14-paneth-cells      | GSM350371  | CEL              |
| 13-paneth-cells      | GSM350371  | CEL              |
| 12-paneth-cells      | GSM350371  | CEL              |
| 11-paneth-cells      | GSM350371  | CEL              |
| 10-paneth-cells      | GSM350371  | CEL              |
| 9-paneth-cells       | GSM350371  | CEL              |
| 8-paneth-cells       | GSM350371  | CEL              |
| 7-paneth-cells       | GSM350371  | CEL              |
| 6-paneth-cells       | GSM350371  | CEL              |
| 5-paneth-cells       | GSM350371  | CEL              |
| 4-paneth-cells       | GSM350371  | CEL              |
| 3-paneth-cells       | GSM350371  | CEL              |
| 2-paneth-cells       | GSM350371  | CEL              |
| 1-paneth-cells       | GSM350371  | CEL              |
| 0-paneth-cells       | GSM350371  | CEL              |







Cluster0259\_High in classical DC (8 nodes)

1,917.8  
1,818.9  
1,715.9  
1,615  
1,514.1  
1,413.1  
1,312.2  
1,211.2  
1,110.3  
1,009.4  
908.4  
807.5  
706.6  
605.6  
504.7  
403.7  
302.8  
201.9  
100.9  
0

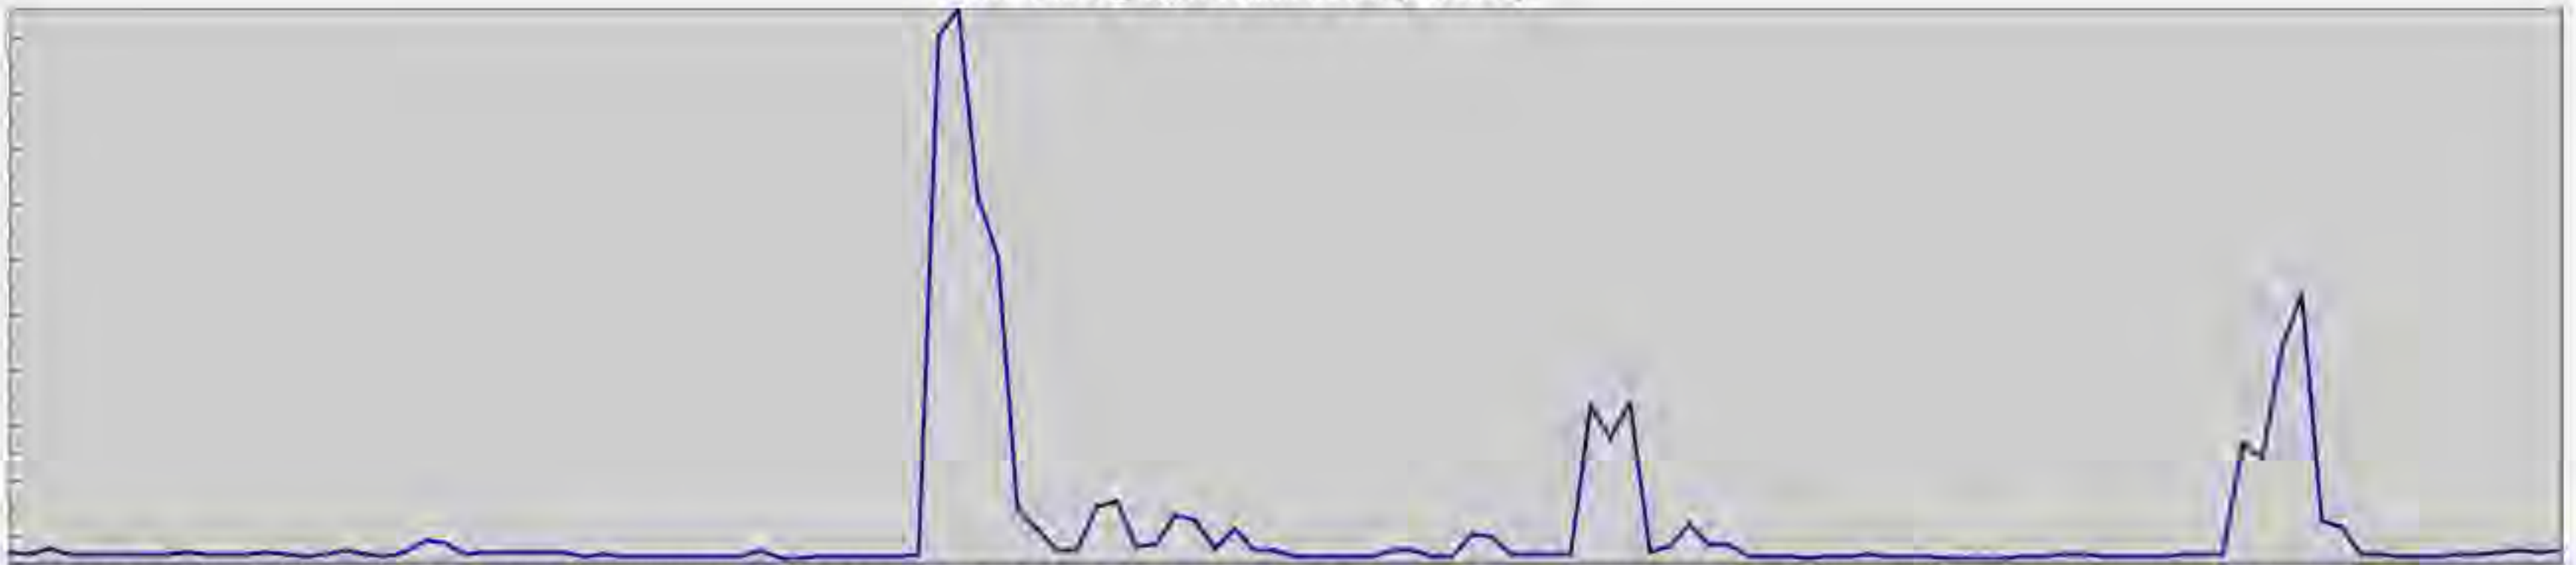

01-PP-M-cells\_GSM190789.CEL  
02-PP-M-cells\_GSM190790.CEL  
03-PP-M-cells\_GSM190791.CEL  
04-CT-V-M-cells\_GSM190792.CEL  
05-CT-V-M-cells\_GSM190793.CEL  
06-CT-V-M-cells\_GSM190794.CEL  
07-Ileum-IEC\_GSM190795.CEL  
08-Ileum-IEC\_GSM190796.CEL  
09-Ileum-IEC\_GSM190797.CEL  
10-FAE-RMPYEP001001.CEL  
11-FAE-RMPYEP002001.CEL  
12-Small-intestine-epithelium\_RMINEP001001.CEL  
13-Small-intestine-epithelium\_RMINEP002001.CEL  
14-Ileum-IEC\_GSM350371.CEL  
15-Ileum-IEC\_GSM350375.CEL  
16-Colon-IEC-Gf\_GSM349880.CEL  
17-Colon-IEC-Gf\_GSM350375.CEL  
18-Colon-Vill-GSM480362.CEL  
19-Colon-Vill-GSM480363.CEL  
20-Colon-Crypt\_GSM480374.CEL  
21-Colon-Crypt\_GSM480375.CEL  
22-Paneth-cells\_GSM318590.CEL  
23-Paneth-cells\_GSM318589.CEL  
24-Paneth-cells\_GSM116359.CEL  
25-Paneth-cells\_GSM116350.CEL  
26-Paneth-cells-Gf-1-GSM116357.CEL  
27-Paneth-cells-Gf-1-GSM116358.CEL  
28-Bone marrow\_GSM258627.CEL  
29-Bone marrow\_GSM258627.CEL  
30-HSC\_GSM258770.CEL  
31-HSC\_GSM258770.CEL  
32-MEP-GSM258720.CEL  
33-MEP-GSM258720.CEL  
34-MEP-GSM258854.CEL  
35-MEP-GSM258854.CEL  
36-GMP-GSM258866.CEL  
37-GMP-GSM258866.CEL  
38-GMP-GSM258866.CEL  
39-Granulocytes\_GSM258667.CEL  
40-Mast-cells\_GSM258712.CEL  
41-Mast-cells\_GSM258712.CEL  
42-Mast-cells-IdU-GSM258714.CEL  
43-Mast-cells-IdU-GSM258714.CEL  
44-Mast-cells-IdU+Ad-GSM258719.CEL  
45-Mast-cells-IdU+Ad-GSM258731.CEL  
46-NK-cells\_GSM258732.CEL  
47-NK-cells\_GSM258732.CEL  
48-CD8a+DC\_GSM258646.CEL  
49-CD8a+DC\_GSM258646.CEL  
50-CD8a-DC\_GSM258647.CEL  
51-CD8a-DC\_GSM258647.CEL  
52-Plasmacytoid-DC\_GSM258650.CEL  
53-Plasmacytoid-DC\_GSM258649.CEL  
54-BM-LPS-6h-GSM258694.CEL  
55-BM-LPS-6h-GSM258694.CEL  
56-BM-LPS-6h-GSM258700.CEL  
57-BM-LPS-6h-GSM258700.CEL  
58-PM-LPS-7h-GSM258705.CEL  
59-PM-LPS-7h-GSM258705.CEL  
60-Microglia\_GSM258721.CEL  
61-Microglia\_GSM258721.CEL  
62-Osteoclasts\_GSM258743.CEL  
63-Osteoclasts\_GSM258743.CEL  
64-Thymocyte-DN\_GSM465595.CEL  
65-Thymocyte-DN\_GSM465595.CEL  
66-T-cells-CD4+GSM258773.CEL  
67-T-cells-CD4+GSM258773.CEL  
68-T-cells-CD8+GSM258775.CEL  
69-T-cells-CD8+GSM258775.CEL  
70-Tregs\_GSM258777.CEL  
71-Tregs\_GSM258777.CEL  
72-Tregs\_GSM258778.CEL  
73-Tregs\_GSM258778.CEL  
74-BAF3\_GSM258620.CEL  
75-BAF3\_GSM258620.CEL  
76-MZ-Bcell\_GSM258621.CEL  
77-MZ-Bcell\_GSM258621.CEL  
78-Follicular-Bcells\_GSM258664.CEL  
79-Follicular-Bcells\_GSM258664.CEL  
80-LY-RMLNDC002001.CEL  
81-LY-RMLNDC003001.CEL  
82-PP-FDC\_GSM481978.CEL  
83-PP-FDC\_GSM481978.CEL  
84-Lymph-endo-cells\_GSM143704.CEL  
85-MS-1\_GSM234692.CEL  
86-LTcell\_GSM465596.CEL  
87-Nat Helper cell\_GSM465593.CEL  
88-Nat Helper cell\_GSM465593.CEL  
89-Chondrocytes\_GSM266741.CEL  
90-Chondrocytes\_GSM266741.CEL  
91-Osteoblast-d5\_GSM258741.CEL  
92-Osteoblast-d5\_GSM258741.CEL  
93-Osteoblast-d14\_GSM258737.CEL  
94-Osteoblast-d14\_GSM258737.CEL  
95-Osteoblast-d21\_GSM258739.CEL  
96-Osteoblast-d21\_GSM258739.CEL  
97-10T1/2-GSM258631.CEL  
98-10T1/2-GSM258631.CEL  
99-3T3-L1\_GSM258610.CEL  
100-3T3-L1\_GSM258610.CEL  
101-NH3T3-GSM258729.CEL  
102-NH3T3-GSM258729.CEL  
103-C2C12\_GSM258829.CEL  
104-C2C12\_GSM258829.CEL  
105-Bruce4-GSM258869.CEL  
106-Bruce4-GSM258869.CEL  
107-MIMCD3\_GSM258723.CEL  
108-MIMCD3\_GSM258723.CEL  
109-mim6\_GSM258725.CEL  
110-mim6\_GSM258725.CEL  
111-Astrocytes\_GSM241898.CEL  
112-Astrocytes\_GSM241898.CEL  
113-Spleen\_GSM258768.CEL  
114-Spleen\_GSM258768.CEL  
115-Neuro2a\_GSM258728.CEL  
116-Neuro2a\_GSM258728.CEL  
117-Lymph-nodes\_GSM258691.CEL  
118-Lymph-nodes\_GSM258691.CEL  
119-Intestine-small\_GSM258677.CEL  
120-Intestine-large\_GSM258677.CEL  
121-Intestine-large\_GSM258676.CEL  
122-Intestine-large\_GSM258676.CEL  
123-Colon-d4-GSM198810.CEL  
124-Colon-d4-GSM198810.CEL  
125-Colon-d9-GSM198810.CEL  
126-Colon-d9-GSM198810.CEL  
127-NALT\_GSM289408.CEL  
128-NALT\_GSM289409.CEL  
129-NALT\_GSM289410.CEL  
130-NALT\_GSM289411.CEL



Cluster0260\_Uncertain-low in many (8 nodes)

167.2  
158.4  
149.6  
140.8  
132  
123.2  
114.4  
105.6  
96.8  
88  
79.2  
70.4  
61.6  
52.8  
44  
35.2  
26.4  
17.6  
8.8  
0

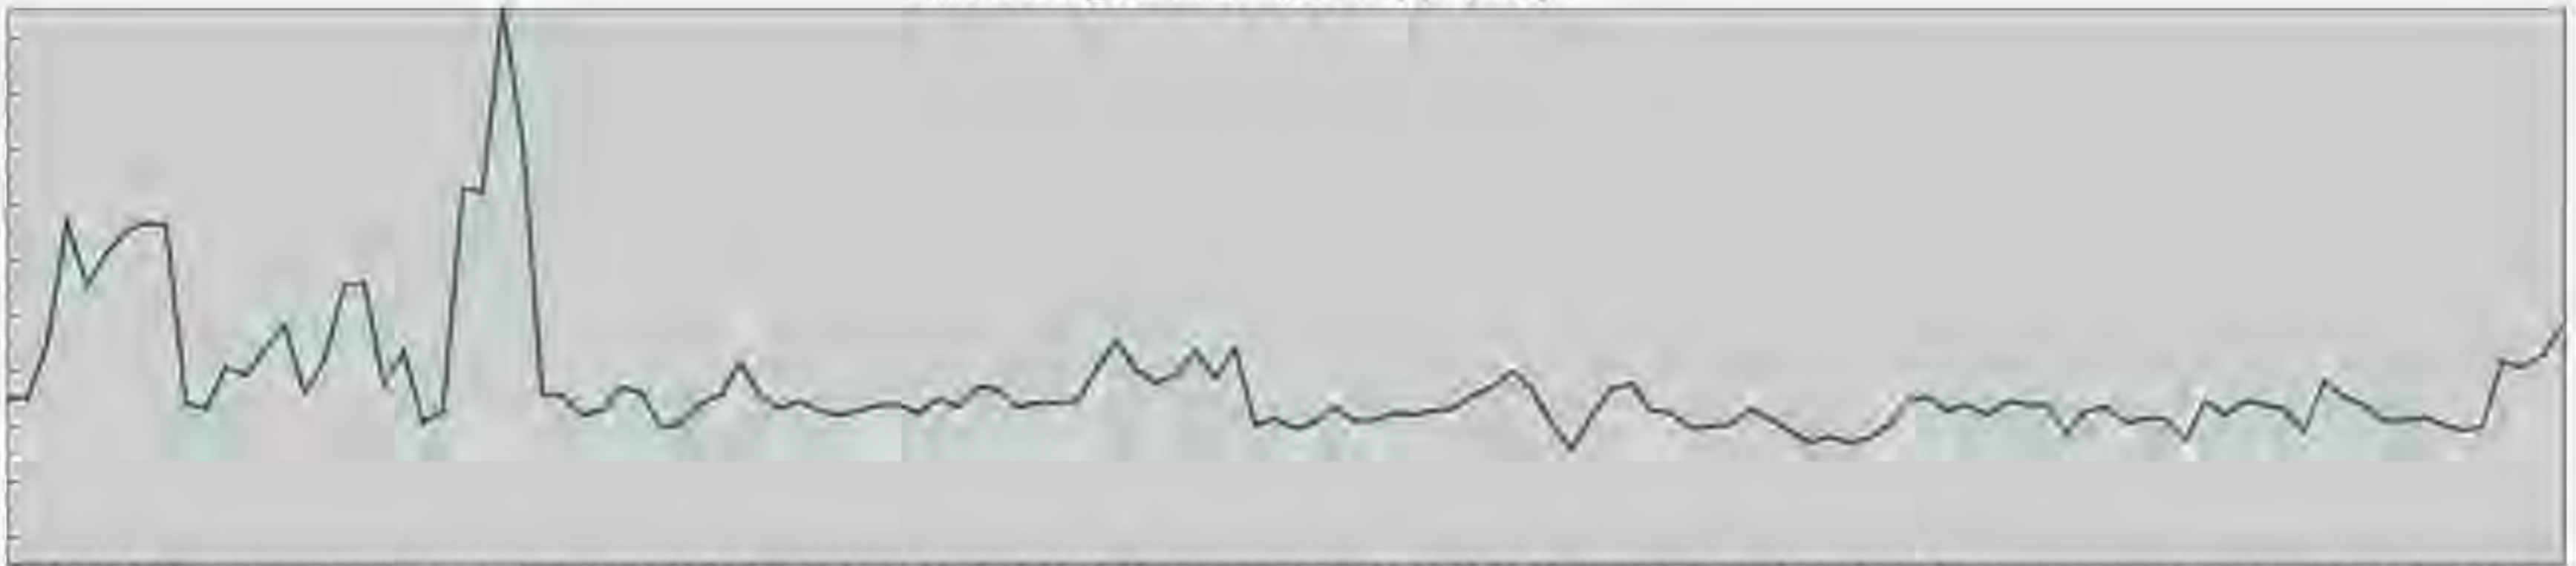

130-NALT GSM289411.CEL  
129-NALT GSM289410.CEL  
128-NALT GSM289409.CEL  
127-NALT GSM289408.CEL  
126-paneth-cells GSM1988105.CEL  
125-paneth-cells GSM1988104.CEL  
124-paneth-cells GSM1988103.CEL  
123-paneth-cells GSM1988102.CEL  
122-paneth-cells GSM1988101.CEL  
121-paneth-cells GSM1988100.CEL  
120-paneth-cells GSM1988099.CEL  
119-paneth-cells GSM1988098.CEL  
118-paneth-cells GSM1988097.CEL  
117-paneth-cells GSM1988096.CEL  
116-paneth-cells GSM1988095.CEL  
115-paneth-cells GSM1988094.CEL  
114-paneth-cells GSM1988093.CEL  
113-paneth-cells GSM1988092.CEL  
112-paneth-cells GSM1988091.CEL  
111-paneth-cells GSM1988090.CEL  
110-paneth-cells GSM1988089.CEL  
109-paneth-cells GSM1988088.CEL  
108-paneth-cells GSM1988087.CEL  
107-paneth-cells GSM1988086.CEL  
106-paneth-cells GSM1988085.CEL  
105-paneth-cells GSM1988084.CEL  
104-paneth-cells GSM1988083.CEL  
103-paneth-cells GSM1988082.CEL  
102-paneth-cells GSM1988081.CEL  
101-paneth-cells GSM1988080.CEL  
100-paneth-cells GSM1988079.CEL  
99-paneth-cells GSM1988078.CEL  
98-paneth-cells GSM1988077.CEL  
97-paneth-cells GSM1988076.CEL  
96-paneth-cells GSM1988075.CEL  
95-paneth-cells GSM1988074.CEL  
94-paneth-cells GSM1988073.CEL  
93-paneth-cells GSM1988072.CEL  
92-paneth-cells GSM1988071.CEL  
91-paneth-cells GSM1988070.CEL  
90-paneth-cells GSM1988069.CEL  
89-paneth-cells GSM1988068.CEL  
88-paneth-cells GSM1988067.CEL  
87-paneth-cells GSM1988066.CEL  
86-paneth-cells GSM1988065.CEL  
85-paneth-cells GSM1988064.CEL  
84-paneth-cells GSM1988063.CEL  
83-paneth-cells GSM1988062.CEL  
82-paneth-cells GSM1988061.CEL  
81-paneth-cells GSM1988060.CEL  
80-paneth-cells GSM1988059.CEL  
79-paneth-cells GSM1988058.CEL  
78-paneth-cells GSM1988057.CEL  
77-paneth-cells GSM1988056.CEL  
76-paneth-cells GSM1988055.CEL  
75-paneth-cells GSM1988054.CEL  
74-paneth-cells GSM1988053.CEL  
73-paneth-cells GSM1988052.CEL  
72-paneth-cells GSM1988051.CEL  
71-paneth-cells GSM1988050.CEL  
70-paneth-cells GSM1988049.CEL  
69-paneth-cells GSM1988048.CEL  
68-paneth-cells GSM1988047.CEL  
67-paneth-cells GSM1988046.CEL  
66-paneth-cells GSM1988045.CEL  
65-paneth-cells GSM1988044.CEL  
64-paneth-cells GSM1988043.CEL  
63-paneth-cells GSM1988042.CEL  
62-paneth-cells GSM1988041.CEL  
61-paneth-cells GSM1988040.CEL  
60-paneth-cells GSM1988039.CEL  
59-paneth-cells GSM1988038.CEL  
58-paneth-cells GSM1988037.CEL  
57-paneth-cells GSM1988036.CEL  
56-paneth-cells GSM1988035.CEL  
55-paneth-cells GSM1988034.CEL  
54-paneth-cells GSM1988033.CEL  
53-paneth-cells GSM1988032.CEL  
52-paneth-cells GSM1988031.CEL  
51-paneth-cells GSM1988030.CEL  
50-paneth-cells GSM1988029.CEL  
49-paneth-cells GSM1988028.CEL  
48-paneth-cells GSM1988027.CEL  
47-paneth-cells GSM1988026.CEL  
46-paneth-cells GSM1988025.CEL  
45-paneth-cells GSM1988024.CEL  
44-paneth-cells GSM1988023.CEL  
43-paneth-cells GSM1988022.CEL  
42-paneth-cells GSM1988021.CEL  
41-paneth-cells GSM1988020.CEL  
40-paneth-cells GSM1988019.CEL  
39-paneth-cells GSM1988018.CEL  
38-paneth-cells GSM1988017.CEL  
37-paneth-cells GSM1988016.CEL  
36-paneth-cells GSM1988015.CEL  
35-paneth-cells GSM1988014.CEL  
34-paneth-cells GSM1988013.CEL  
33-paneth-cells GSM1988012.CEL  
32-paneth-cells GSM1988011.CEL  
31-paneth-cells GSM1988010.CEL  
30-paneth-cells GSM1988009.CEL  
29-paneth-cells GSM1988008.CEL  
28-paneth-cells GSM1988007.CEL  
27-paneth-cells GSM1988006.CEL  
26-paneth-cells GSM1988005.CEL  
25-paneth-cells GSM1988004.CEL  
24-paneth-cells GSM1988003.CEL  
23-paneth-cells GSM1988002.CEL  
22-paneth-cells GSM1988001.CEL  
21-paneth-cells GSM1988000.CEL  
20-paneth-cells GSM1988000.CEL  
19-paneth-cells GSM1988000.CEL  
18-paneth-cells GSM1988000.CEL  
17-paneth-cells GSM1988000.CEL  
16-paneth-cells GSM1988000.CEL  
15-paneth-cells GSM1988000.CEL  
14-paneth-cells GSM1988000.CEL  
13-paneth-cells GSM1988000.CEL  
12-paneth-cells GSM1988000.CEL  
11-paneth-cells GSM1988000.CEL  
10-paneth-cells GSM1988000.CEL  
9-paneth-cells GSM1988000.CEL  
8-paneth-cells GSM1988000.CEL  
7-paneth-cells GSM1988000.CEL  
6-paneth-cells GSM1988000.CEL  
5-paneth-cells GSM1988000.CEL  
4-paneth-cells GSM1988000.CEL  
3-paneth-cells GSM1988000.CEL  
2-paneth-cells GSM1988000.CEL  
1-paneth-cells GSM1988000.CEL



Cluster0261\_House keeping (8 nodes)

12,827.5  
12,152.4  
11,477.3  
10,802.1  
10,127  
9,451.9  
8,776.7  
8,101.6  
7,426.5  
6,751.3  
6,076.2  
5,401.1  
4,725.9  
4,050.8  
3,375.7  
2,700.5  
2,025.4  
1,350.3  
675.1  
0

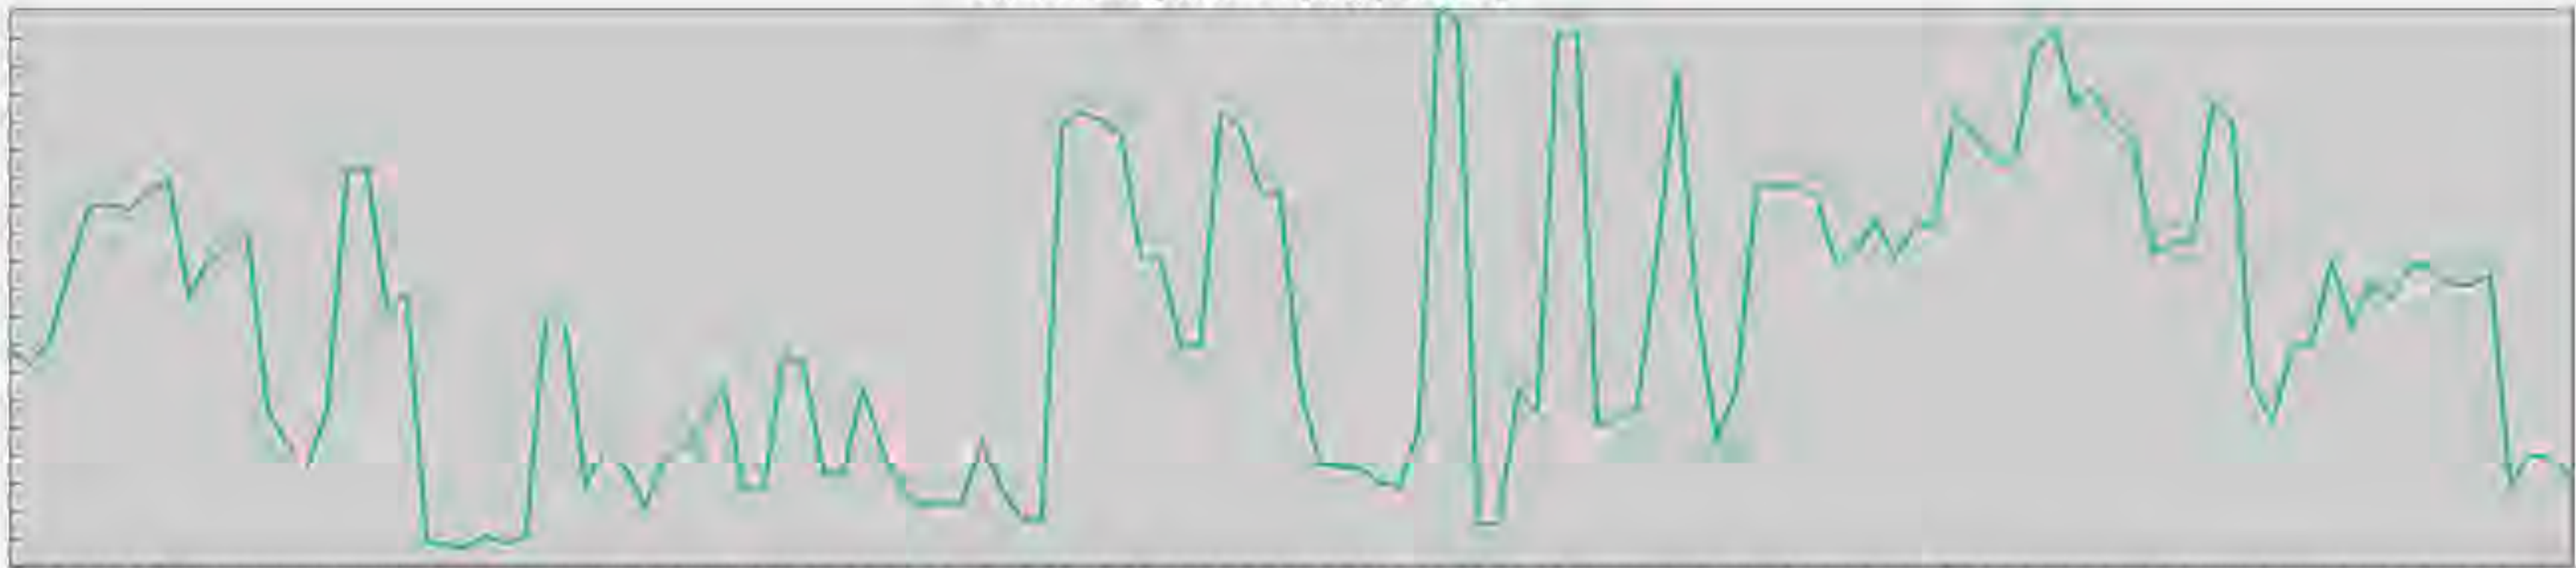

130-NALT GSM289411.CEL  
129-NALT GSM289410.CEL  
128-NALT GSM289409.CEL  
127-NALT GSM289408.CEL  
126-CD8A GSM1988105.CEL  
125-CD8A GSM1988104.CEL  
124-CD8A GSM1988103.CEL  
123-CD8A GSM1988102.CEL  
122-CD8A GSM1988101.CEL  
121-Intestine-large GSM258676.CEL  
120-Intestine-large GSM258675.CEL  
119-Intestine-small GSM258678.CEL  
118-Intestine-small GSM258677.CEL  
117-Lymph-nodes GSM258691.CEL  
116-Lymph-nodes GSM258692.CEL  
115-Spleen GSM258767.CEL  
114-Spleen GSM258766.CEL  
113-Neuro2a GSM258728.CEL  
112-Neuro2a GSM258727.CEL  
111-Astrocytes GSM241898.CEL  
110-mim6 GSM258726.CEL  
109-mim6 GSM258725.CEL  
108-MIMCD3 GSM258724.CEL  
107-MIMCD3 GSM258723.CEL  
106-Bruce4 GSM258656.CEL  
105-Bruce4 GSM258655.CEL  
104-C2C12 GSM258690.CEL  
103-C2C12 GSM258689.CEL  
102-NH3T3 GSM258739.CEL  
101-NH3T3 GSM258738.CEL  
100-3T3-L1 GSM258610.CEL  
99-3T3-L1 GSM258609.CEL  
98-10T12 GSM258632.CEL  
97-10T12 GSM258631.CEL  
96-Osteoblast-d21 GSM258740.CEL  
95-Osteoblast-d21 GSM258739.CEL  
94-Osteoblast-d14 GSM258738.CEL  
93-Osteoblast-d14 GSM258737.CEL  
92-Osteoblast-d5 GSM258742.CEL  
91-Osteoblast-d5 GSM258741.CEL  
90-Chondrocytes GSM266741.CEL  
89-Chondrocytes GSM266740.CEL  
88-Nat Helper cell GSM465594.CEL  
87-Nat Helper cell GSM465593.CEL  
86-LT cell GSM465596.CEL  
85-MS-1 GSM234692.CEL  
84-Lymph-endg-cells GSM143704.CEL  
83-PP-FDC GSM481977.CEL  
82-PP-FDC GSM481978.CEL  
81-PP-FDC GSM481976.CEL  
80-FLY RMLNDC003001.CEL  
79-FLY RMLNDC003001.CEL  
78-Follicular-Bcells GSM258664.CEL  
77-Follicular-Bcells GSM258663.CEL  
76-MZ-Bcell GSM258622.CEL  
75-MZ-Bcell GSM258621.CEL  
74-BAF3 GSM258620.CEL  
73-BAF3 GSM258619.CEL  
72-Tregs GSM258778.CEL  
71-Tregs GSM258777.CEL  
70-T-cells-CD8+ GSM258776.CEL  
69-T-cells-CD8+ GSM258775.CEL  
68-T-cells-CD4+ GSM258774.CEL  
67-T-cells-CD4+ GSM258773.CEL  
66-Thymocyte-DN GSM465595.CEL  
65-Osteoclasts GSM258744.CEL  
64-Osteoclasts GSM258743.CEL  
63-Microglia GSM258721.CEL  
62-Microglia GSM258721.CEL  
61-PM-M-LPS-7h GSM258706.CEL  
60-PM-M-LPS-7h GSM258705.CEL  
59-PM-M-LPS-7h GSM258702.CEL  
58-PM-M-LPS-6h GSM258701.CEL  
57-PM-M-LPS-6h GSM258699.CEL  
56-PM-M-LPS-6h GSM258699.CEL  
55-PM-M-LPS-6h GSM258699.CEL  
54-PM-M-LPS-6h GSM258699.CEL  
53-Plasmacytoid-DC GSM258650.CEL  
52-Plasmacytoid-DC GSM258649.CEL  
51-CD8a-DC GSM258648.CEL  
50-CD8a-DC GSM258647.CEL  
49-CD8a+DC GSM258646.CEL  
48-CD8a+DC GSM258645.CEL  
47-NK-cells GSM258732.CEL  
46-NK-cells GSM258731.CEL  
45-Mast-cells-IgE+Ad GSM258718.CEL  
44-Mast-cells-IgE+Ad GSM258717.CEL  
43-Mast-cells-IgE GSM258714.CEL  
42-Mast-cells-IgE GSM258713.CEL  
41-Mast-cells GSM258712.CEL  
40-Granulocytes GSM258668.CEL  
39-Granulocytes GSM258667.CEL  
38-GMP GSM258666.CEL  
37-GMP GSM258665.CEL  
36-GMP GSM258664.CEL  
35-GMP GSM258642.CEL  
34-MEP GSM258720.CEL  
33-MEP GSM258719.CEL  
32-MEP GSM258719.CEL  
31-H9c GSM258770.CEL  
30-H9c GSM258770.CEL  
29-Bone marrow GSM258628.CEL  
28-Bone marrow GSM258627.CEL  
27-Paneth-cells-GF GSM116358.CEL  
26-Paneth-cells-GF-1 GSM116357.CEL  
25-Paneth-cells GSM116350.CEL  
24-Paneth-cells GSM116359.CEL  
23-Paneth-cells GSM318589.CEL  
22-Paneth-cells GSM318590.CEL  
21-CD8a-DC GSM480375.CEL  
20-CD8a-DC GSM480374.CEL  
19-CD8a-DC GSM480363.CEL  
18-CD8a-DC GSM480362.CEL  
17-CD8a-DC GSM349880.CEL  
16-CD8a-DC GSM350375.CEL  
15-CD8a-DC GSM350376.CEL  
14-CD8a-DC GSM350371.CEL  
13-Small-intestine-epithelium RMINEP002901.CEL  
12-Small-intestine-epithelium RMINEP001001.CEL  
11-FAE-RMPYEP002001.CEL  
10-FAE-RMPYEP001001.CEL  
09-Ileum-IEC GSM190797.CEL  
08-Ileum-IEC GSM190796.CEL  
07-Ileum-IEC GSM190795.CEL  
06-CT-v-M-cells GSM190794.CEL  
05-CT-v-M-cells GSM190793.CEL  
04-PP-M-cells GSM190792.CEL  
03-PP-M-cells GSM190791.CEL  
02-PP-M-cells GSM190790.CEL  
01-PP-M-cells GSM190789.CEL



Cluster0262\_Uncertain (8 nodes)

217.1  
205.7  
194.2  
182.8  
171.4  
160  
148.5  
137.1  
125.7  
114.3  
102.8  
91.4  
80  
68.6  
57.1  
45.7  
34.3  
22.9  
11.4  
0

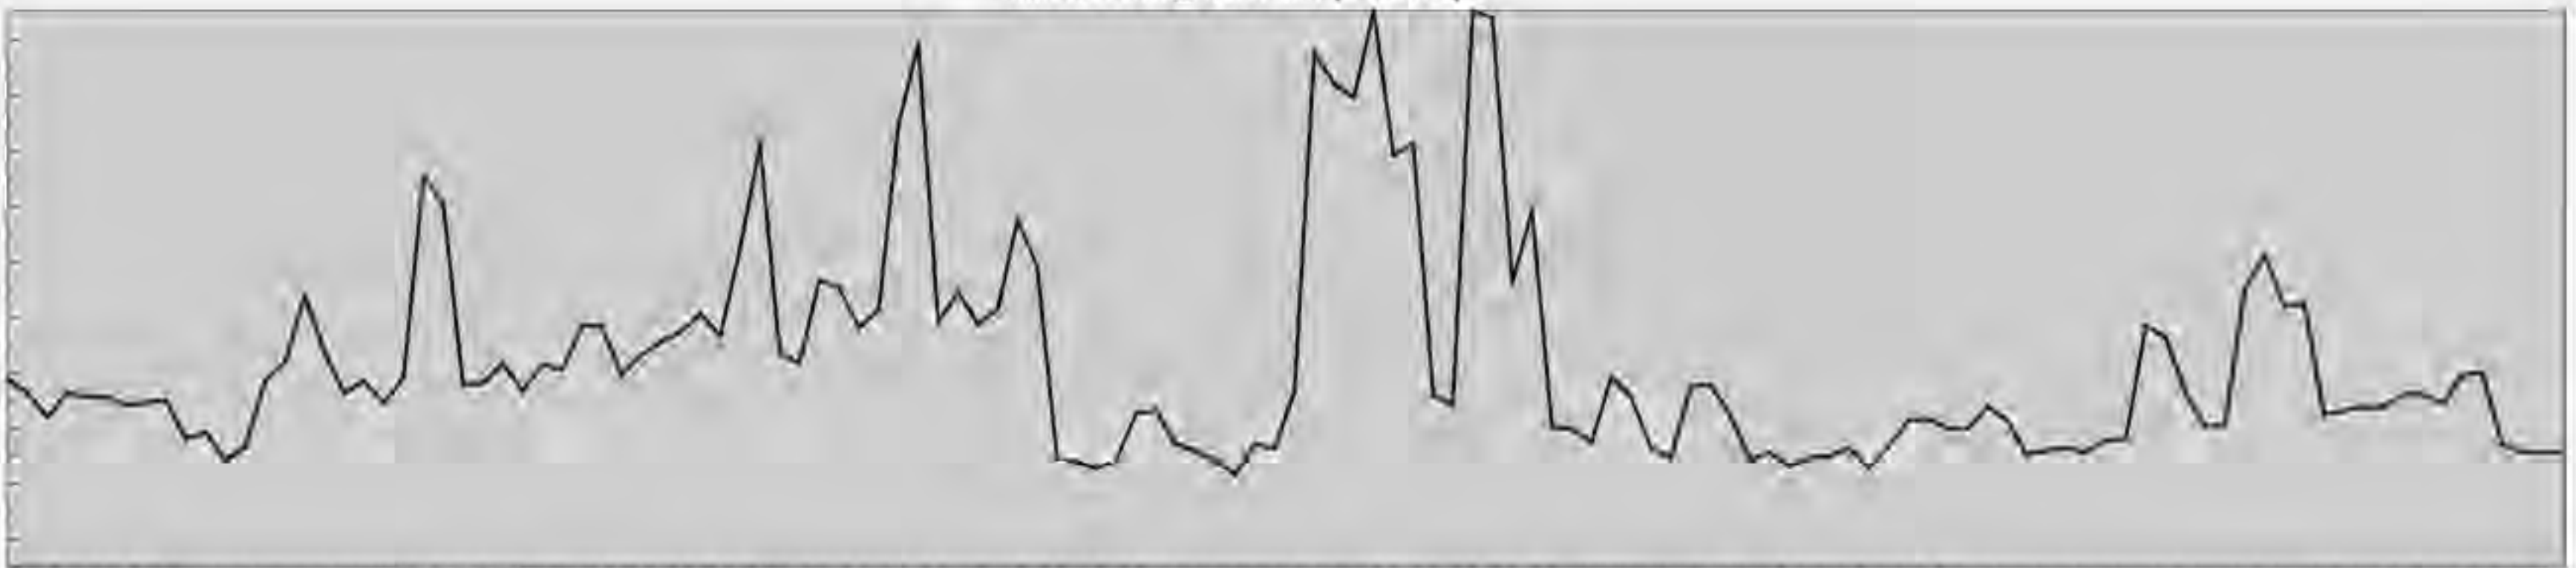

130-NALT GSM289411 CELL  
129-NALT GSM289410 CELL  
128-NALT GSM289409 CELL  
127-NALT GSM289408 CELL  
126-Color-d9 GSM1988105 CELL  
125-Color-d9 GSM1988103 CELL  
124-Color-d9 GSM1988102 CELL  
123-Color-d4 GSM1988101 CELL  
122-Color-d4 GSM1988100 CELL  
121-Intestine-large GSM258676 CELL  
120-Intestine-large GSM258675 CELL  
119-Intestine-small GSM258677 CELL  
118-Intestine-small GSM258692 CELL  
117-Lymph-nodes GSM258691 CELL  
116-Spleen GSM258766 CELL  
115-Spleen GSM258767 CELL  
114-Neuro2a GSM258728 CELL  
113-Neuro2a GSM258727 CELL  
112-Astrocytes GSM241898 CELL  
111-ming GSM258726 CELL  
110-ming GSM258725 CELL  
109-mim6 GSM258724 CELL  
108-MIMCD3 GSM258723 CELL  
107-MIMCD3 GSM258722 CELL  
106-Bruce4 GSM258656 CELL  
105-Bruce4 GSM258655 CELL  
104-C2C12 GSM258690 CELL  
103-C2C12 GSM258689 CELL  
102-NH3T3 GSM258739 CELL  
101-NH3T3 GSM258738 CELL  
100-3T3-L1 GSM258610 CELL  
99-3T3-L1 GSM258609 CELL  
98-10T12 GSM258632 CELL  
97-10T12 GSM258631 CELL  
96-Osteoblast-d21 GSM258740 CELL  
95-Osteoblast-d14 GSM258738 CELL  
94-Osteoblast-d14 GSM258737 CELL  
93-Osteoblast-d14 GSM258742 CELL  
92-Osteoblast-d5 GSM258741 CELL  
91-Osteoblast-d5 GSM258741 CELL  
90-Chondrocytes GSM266741 CELL  
89-Chondrocytes GSM266740 CELL  
88-Nat Helper cell GSM465594 CELL  
87-Nat Helper cell GSM465593 CELL  
86-LT cell GSM465596 CELL  
85-MS-1 GSM234692 CELL  
84-Lymph-endo-cells GSM143704 CELL  
83-P-FDC GSM481977 CELL  
82-P-FDC GSM481978 CELL  
81-P-FDC GSM481976 CELL  
80-LY RMLND003001 CELL  
79-LY RMLND003001 CELL  
78-Follicular-Bcells GSM258664 CELL  
77-Follicular-Bcells GSM258663 CELL  
76-MZ-Bcell GSM258621 CELL  
75-MZ-Bcell GSM258621 CELL  
74-BAF3 GSM258620 CELL  
73-BAF3 GSM258619 CELL  
72-Tregs GSM258778 CELL  
71-Tregs GSM258777 CELL  
70-T-cells-CD8+ GSM258776 CELL  
69-T-cells-CD8+ GSM258774 CELL  
68-T-cells-CD4+ GSM258773 CELL  
67-T-cells-CD4+ GSM258744 CELL  
66-Thymocyte-DN GSM465595 CELL  
65-Osteoclasts GSM258743 CELL  
64-Osteoclasts GSM258743 CELL  
63-Microglia GSM258721 CELL  
62-Microglia GSM258721 CELL  
61-MM-LPS-7h GSM258706 CELL  
60-MM-LPS-7h GSM258706 CELL  
59-MM-LPS-6h GSM258702 CELL  
58-MM-LPS-6h GSM258702 CELL  
57-MM-LPS-6h GSM258699 CELL  
56-MM-LPS-6h GSM258699 CELL  
55-MM-LPS-6h GSM258694 CELL  
54-MM-LPS-6h GSM258694 CELL  
53-Ismacryoid-DC GSM258650 CELL  
52-Ismacryoid-DC GSM258649 CELL  
51-CD8a-DC GSM258648 CELL  
50-CD8a-DC GSM258647 CELL  
49-CD8a+DC GSM258646 CELL  
48-CD8a+DC GSM258646 CELL  
47-NK-cells GSM258732 CELL  
46-NK-cells GSM258732 CELL  
45-Mast-cells-IgE+Ad GSM258719 CELL  
44-Mast-cells-IgE+Ad GSM258717 CELL  
43-Mast-cells-IgE GSM258714 CELL  
42-Mast-cells-IgE GSM258713 CELL  
41-Mast-cells-IgE GSM258712 CELL  
40-Granulocytes GSM258667 CELL  
39-Granulocytes GSM258667 CELL  
38-GMP GSM258666 CELL  
37-GMP GSM258666 CELL  
36-GMP GSM258665 CELL  
35-GMP GSM258664 CELL  
34-MPEP GSM258872 CELL  
33-MPEP GSM258871 CELL  
32-MPEP GSM258871 CELL  
31-HSC GSM258870 CELL  
30-HSC GSM258870 CELL  
29-Bone marrow GSM258628 CELL  
28-Bone marrow GSM258627 CELL  
27-paneth-cells-GE GSM116358 CELL  
26-paneth-cells-GE GSM116357 CELL  
25-paneth-cells GSM116350 CELL  
24-paneth-cells GSM116359 CELL  
23-paneth-cells GSM318589 CELL  
22-paneth-cells GSM318590 CELL  
21-paneth-cells GSM318590 CELL  
20-Color-Crypt GSM480375 CELL  
19-Color-Vill GSM480363 CELL  
18-Color-Vill GSM480362 CELL  
17-Color-IEC-GE GSM349880 CELL  
16-Color-IEC-GE GSM350375 CELL  
15-Ileum-IEC GSM350375 CELL  
14-Ileum-IEC GSM350376 CELL  
13-Small-intestine-epithelium RMINEP002901 CELL  
12-Small-intestine-epithelium RMINEP001001 CELL  
11-FAE-RMPYEP002001 CELL  
10-FAE-RMPYEP001001 CELL  
09-Ileum-IEC GSM190797 CELL  
08-Ileum-IEC GSM190796 CELL  
07-Ileum-IEC GSM190795 CELL  
06-CT-w-M-cells GSM190794 CELL  
05-CT-w-M-cells GSM190793 CELL  
04-CT-y-M-cells GSM190792 CELL  
03-PP-M-cells GSM190791 CELL  
02-PP-M-cells GSM190790 CELL  
01-PP-M-cells GSM190789 CELL



Cluster0263\_Uncertain (8 nodes)

290.6  
275.3  
260  
244.7  
229.4  
214.1  
198.8  
183.5  
168.2  
153  
137.7  
121.4  
107.1  
91.8  
76.5  
61.2  
45.9  
30.6  
15.3  
0

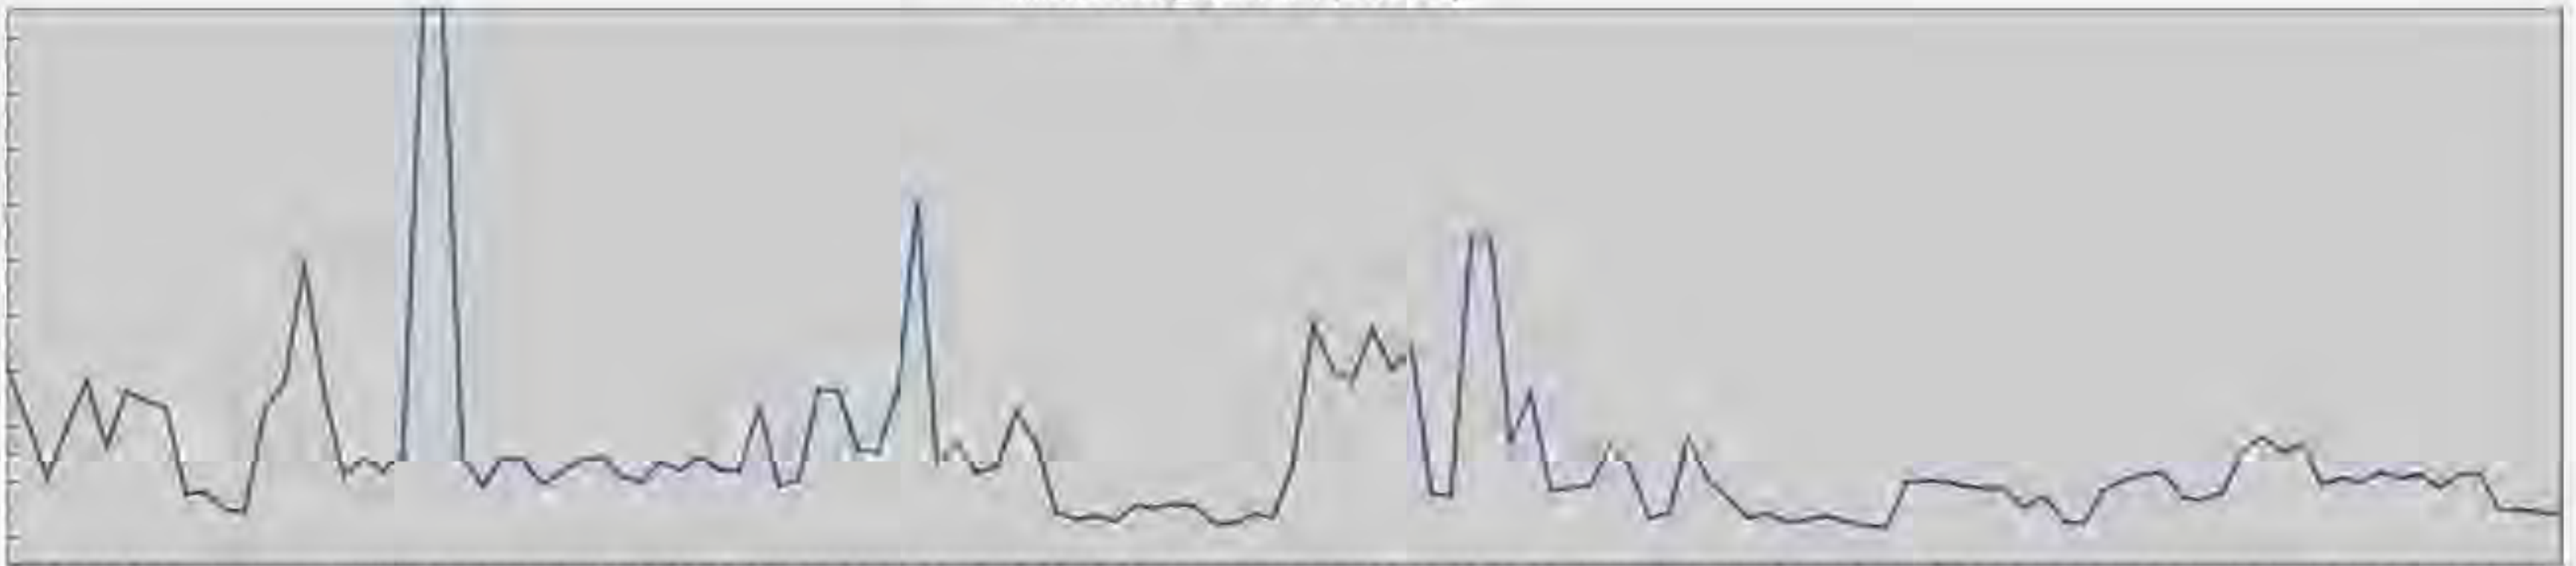

130- NALT GSM289411.CEL  
 129- NALT GSM289410.CEL  
 128- NALT GSM289409.CEL  
 127- NALT GSM289408.CEL  
 126- Colon-d9 GSM1988105.CEL  
 125- Colon-d9 GSM1988104.CEL  
 124- Colon-d9 GSM1988103.CEL  
 123- Colon-d4 GSM1988102.CEL  
 122- Colon-d4 GSM1988101.CEL  
 121- Intestine-large GSM258676.CEL  
 120- Intestine-large GSM258675.CEL  
 119- Intestine-small GSM258678.CEL  
 118- Intestine-small GSM258692.CEL  
 117- Lymph-nodes GSM258691.CEL  
 116- Lymph-nodes GSM258726.CEL  
 115- Spleen GSM258768.CEL  
 114- Spleen GSM258767.CEL  
 113- Neuro2a GSM258728.CEL  
 112- Neuro2a GSM258727.CEL  
 111- Astrocytes GSM241898.CEL  
 110- mimb GSM258726.CEL  
 109- mimb GSM258725.CEL  
 108- MIMCD3 GSM258724.CEL  
 107- MIMCD3 GSM258723.CEL  
 106- Bruce4 GSM258656.CEL  
 105- Bruce4 GSM258655.CEL  
 104- C2C12 GSM258690.CEL  
 103- C2C12 GSM258629.CEL  
 102- NIH3T3 GSM258730.CEL  
 101- NIH3T3 GSM258729.CEL  
 100- 3T3-L1 GSM258610.CEL  
 99- 3T3-L1 GSM258609.CEL  
 98- 10T12 GSM258632.CEL  
 97- 10T12 GSM258631.CEL  
 96- Osteoblast-d21 GSM258740.CEL  
 95- Osteoblast-d21 GSM258739.CEL  
 94- Osteoblast-d14 GSM258738.CEL  
 93- Osteoblast-d14 GSM258737.CEL  
 92- Osteoblast-d5 GSM258742.CEL  
 91- Osteoblast-d5 GSM258741.CEL  
 90- Chondrocytes GSM266741.CEL  
 89- Nat Helper cell GSM465594.CEL  
 88- Nat Helper cell GSM465593.CEL  
 87- T cell GSM465596.CEL  
 86- MS-1 GSM234692.CEL  
 85- Lymph-endo-cells GSM143704.CEL  
 84- PFDc GSM481977.CEL  
 83- PFDc GSM481978.CEL  
 82- PFDc GSM481976.CEL  
 81- PFDc GSM481976.CEL  
 80- FLY RMLNDCC003001.CEL  
 79- FLY RMLNDCC003001.CEL  
 78- Follicular-Bcells GSM258664.CEL  
 77- Follicular-Bcells GSM258663.CEL  
 76- MZ-Bcell GSM258627.CEL  
 75- MZ-Bcell GSM258621.CEL  
 74- BAF3 GSM258620.CEL  
 73- BAF3 GSM258619.CEL  
 72- Tregs GSM258778.CEL  
 71- Tregs GSM258777.CEL  
 70- T-cells-CD8+ GSM258776.CEL  
 69- T-cells-CD8+ GSM258775.CEL  
 68- T-cells-CD4+ GSM258774.CEL  
 67- T-cells-CD4+ GSM258773.CEL  
 66- Thymocyte-DN GSM465595.CEL  
 65- Osteoclasts GSM258744.CEL  
 64- Osteoclasts GSM258743.CEL  
 63- Microglia GSM258721.CEL  
 62- Microglia GSM258721.CEL  
 61- PMS-7h GSM258706.CEL  
 60- PMS-7h GSM258706.CEL  
 59- PMS-6h GSM258702.CEL  
 58- PMS-6h GSM258701.CEL  
 57- BMM-LPS-6h GSM258699.CEL  
 56- BMM-LPS-6h GSM258699.CEL  
 55- BMM GSM258694.CEL  
 54- BMM GSM258694.CEL  
 53- Iasmacryoid-DC GSM258650.CEL  
 52- Iasmacryoid-DC GSM258649.CEL  
 51- CD8a-DC GSM258648.CEL  
 50- CD8a-DC GSM258647.CEL  
 49- CD8a+DC GSM258646.CEL  
 48- CD8a+DC GSM258645.CEL  
 47- NK-cells GSM258732.CEL  
 46- NK-cells GSM258731.CEL  
 45- Mast-cells-IgE+Ad GSM258718.CEL  
 44- Mast-cells-IgE+Ad GSM258717.CEL  
 43- Mast-cells-IgE GSM258714.CEL  
 42- Mast-cells-IgE GSM258713.CEL  
 41- Mast-cells GSM258712.CEL  
 40- Granulocytes GSM258668.CEL  
 39- Granulocytes GSM258667.CEL  
 38- GMP GSM258666.CEL  
 37- GMP GSM258665.CEL  
 36- GMP GSM258664.CEL  
 35- CMP GSM258642.CEL  
 34- CMP GSM258641.CEL  
 33- MIEP GSM258720.CEL  
 32- MIEP GSM258719.CEL  
 31- HESC GSM258770.CEL  
 30- HESC GSM258769.CEL  
 29- Bone marrow GSM258628.CEL  
 28- Bone marrow GSM258627.CEL  
 27- Paneth-cells-GF GSM116357.CEL  
 26- Paneth-cells-GF GSM116350.CEL  
 25- Paneth-cells GSM116350.CEL  
 24- Paneth-cells GSM116359.CEL  
 23- Paneth-cells GSM318589.CEL  
 22- Paneth-cells GSM318590.CEL  
 21- Colon-Crypt GSM480375.CEL  
 20- Colon-Crypt GSM480374.CEL  
 19- Colon-VIII GSM480363.CEL  
 18- Colon-VIII GSM480362.CEL  
 17- Colon-IEC-GF GSM349880.CEL  
 16- Colon-IEC-GF GSM350375.CEL  
 15- Ileum-IEC-GF GSM350376.CEL  
 14- Ileum-IEC GSM350371.CEL  
 13- Small-intestine-epithelium RMINEP002001.CEL  
 12- Small-intestine-epithelium RMINEP001001.CEL  
 11- FAE RMPYEP002001.CEL  
 10- FAE RMPYEP001001.CEL  
 09- Ileum-IEC GSM190797.CEL  
 08- Ileum-IEC GSM190796.CEL  
 07- Ileum-IEC GSM190795.CEL  
 06- CT-v-M-cells GSM190794.CEL  
 05- CT-v-M-cells GSM190793.CEL  
 04- PP-M-cells GSM190792.CEL  
 03- PP-M-cells GSM190791.CEL  
 02- PP-M-cells GSM190790.CEL  
 01- PP-M-cells GSM190789.CEL



Cluster0264\_Uncertain (8 nodes)

153.3  
145.3  
137.2  
129.1  
121.1  
113  
104.9  
96.8  
88.8  
80.7  
72.6  
64.6  
56.5  
48.4  
40.4  
32.3  
24.2  
16.1  
8.1  
0

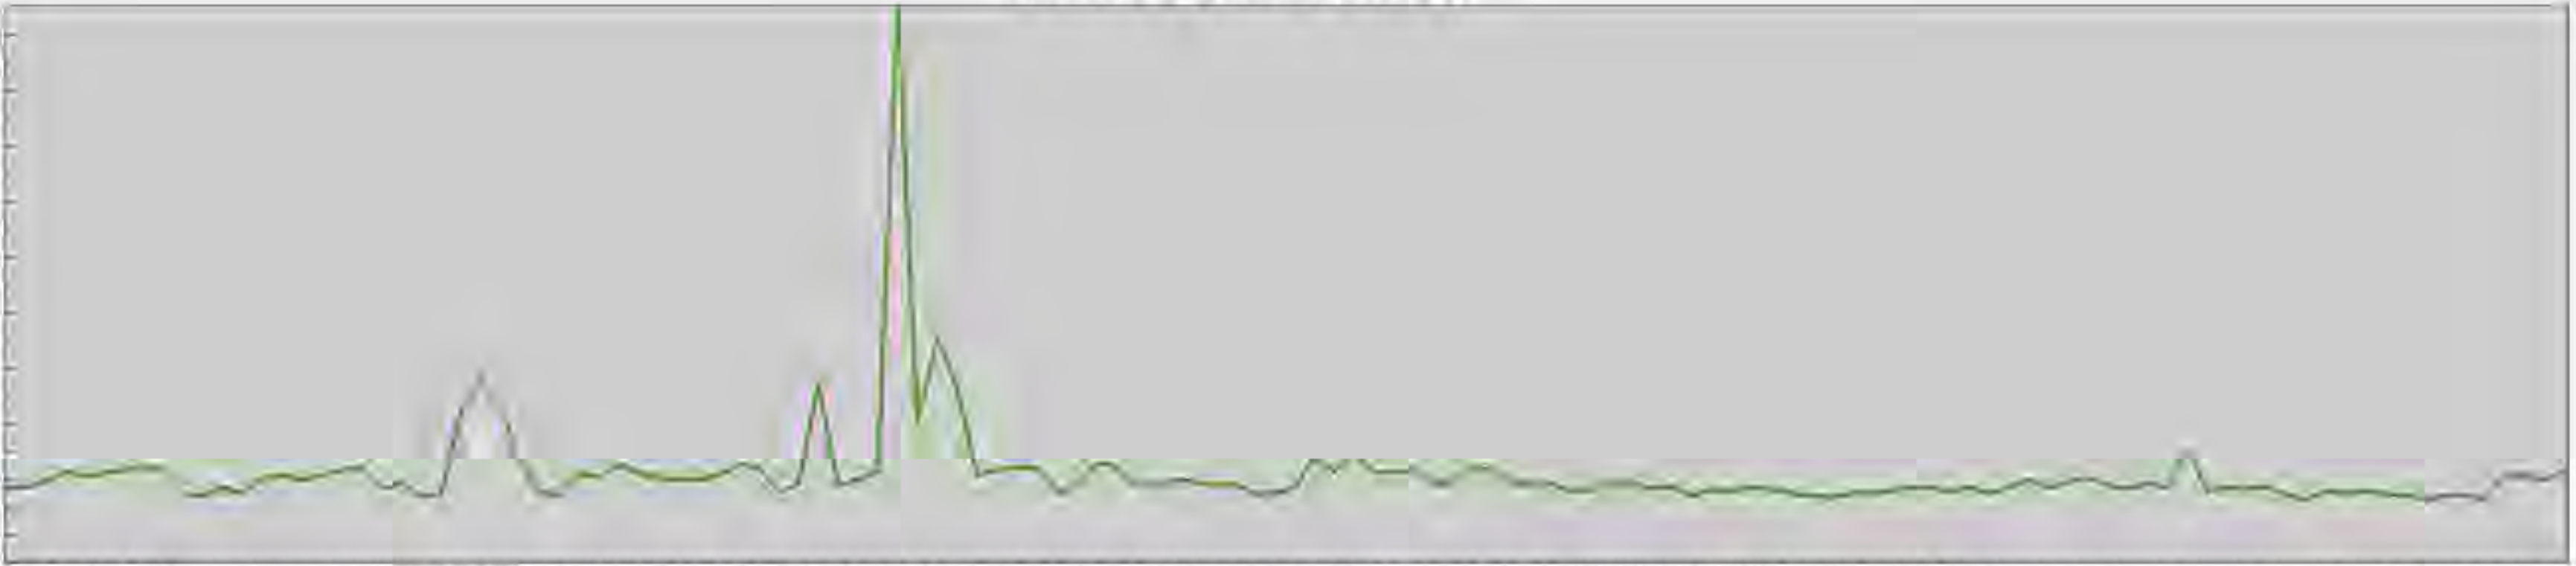

130-NALT GSM289411 CEL  
129-NALT GSM289410 CEL  
128-NALT GSM289409 CEL  
127-NALT GSM289408 CEL  
126-Colon-d9 GSM1988105 CEL  
125-Colon-d9 GSM1988104 CEL  
124-Colon-d9 GSM1988103 CEL  
123-Colon-d4 GSM1988102 CEL  
122-Colon-d4 GSM1988101 CEL  
121-Intestine-large GSM258676 CEL  
120-Intestine-large GSM258675 CEL  
119-Intestine-small GSM258678 CEL  
118-Intestine-small GSM258677 CEL  
117-Lymph-nodes GSM258691 CEL  
116-Lymph-nodes GSM258692 CEL  
115-Spleen GSM258766 CEL  
114-Spleen GSM258767 CEL  
113-Neuro2a GSM258728 CEL  
112-Neuro2a GSM258729 CEL  
111-Astrocytes GSM241898 CEL  
110-mimb GSM258726 CEL  
109-mimb GSM258725 CEL  
108-MIMCD3 GSM258724 CEL  
107-MIMCD3 GSM258723 CEL  
106-Bruce4 GSM258656 CEL  
105-Bruce4 GSM258655 CEL  
104-C2C12 GSM258690 CEL  
103-C2C12 GSM258689 CEL  
102-NH3T3 GSM258730 CEL  
101-NH3T3 GSM258729 CEL  
100-3T3-L1 GSM258610 CEL  
99-3T3-L1 GSM258609 CEL  
98-10T12 GSM258632 CEL  
97-10T12 GSM258631 CEL  
96-Osteoblast-d21 GSM258740 CEL  
95-Osteoblast-d21 GSM258739 CEL  
94-Osteoblast-d14 GSM258738 CEL  
93-Osteoblast-d14 GSM258737 CEL  
92-Osteoblast-d5 GSM258742 CEL  
91-Osteoblast-d5 GSM258741 CEL  
90-Chondrocytes GSM266741 CEL  
89-Chondrocytes GSM266740 CEL  
88-Nat Helper cell GSM465594 CEL  
87-Nat Helper cell GSM465593 CEL  
86-TT cell GSM465596 CEL  
85-MS-1 GSM234692 CEL  
84-Lymph-endo-cells GSM143704 CEL  
83-PP-FDC GSM481977 CEL  
82-PP-FDC GSM481978 CEL  
81-PP-FDC GSM481976 CEL  
80-F-L-Y RMLNDCC003001 CEL  
79-F-L-Y RMLNDCC003001 CEL  
78-Follicular-Bcells GSM258664 CEL  
77-Follicular-Bcells GSM258663 CEL  
76-MZ-Bcell GSM258622 CEL  
75-MZ-Bcell GSM258621 CEL  
74-BAF3 GSM258620 CEL  
73-BAF3 GSM258619 CEL  
72-Tregs GSM258778 CEL  
71-Tregs GSM258777 CEL  
70-T-cells-CD8+ GSM258776 CEL  
69-T-cells-CD8+ GSM258774 CEL  
68-T-cells-CD4+ GSM258773 CEL  
67-T-cells-CD4+ GSM258773 CEL  
66-Thymocyte-DN GSM465595 CEL  
65-Osteoclasts GSM258743 CEL  
64-Osteoclasts GSM258743 CEL  
63-Microglia GSM258721 CEL  
62-Microglia GSM258721 CEL  
61-MM-PS-7h GSM258706 CEL  
60-MM-PS-7h GSM258706 CEL  
59-MM-PS-6h GSM258702 CEL  
58-MM-PS-6h GSM258702 CEL  
57-MM-LPS-6h GSM258699 CEL  
56-MM-LPS-6h GSM258699 CEL  
55-MM-LPS-6h GSM258694 CEL  
54-MM-LPS-6h GSM258694 CEL  
53-Plasmacytoid-DC GSM258650 CEL  
52-Plasmacytoid-DC GSM258649 CEL  
51-CD8a-DC GSM258648 CEL  
50-CD8a-DC GSM258647 CEL  
49-CD8a+DC GSM258646 CEL  
48-CD8a+DC GSM258646 CEL  
47-NK-cells GSM258732 CEL  
46-NK-cells GSM258732 CEL  
45-Mast-cells-IgE+Ad GSM258719 CEL  
44-Mast-cells-IgE+Ad GSM258717 CEL  
43-Mast-cells-IgE GSM258714 CEL  
42-Mast-cells-IgE GSM258713 CEL  
41-Mast-cells GSM258712 CEL  
40-Granulocytes GSM258668 CEL  
39-Granulocytes GSM258667 CEL  
38-GMP GSM258666 CEL  
37-GMP GSM258665 CEL  
36-GMP GSM258664 CEL  
35-CMP GSM258642 CEL  
34-CMP GSM258641 CEL  
33-MEP GSM258720 CEL  
32-MEP GSM258719 CEL  
31-HESC GSM258770 CEL  
30-HESC GSM258770 CEL  
29-Bone marrow GSM258628 CEL  
28-Bone marrow GSM258627 CEL  
27-paneth-cells-GE GSM116358 CEL  
26-paneth-cells-GE GSM116357 CEL  
25-paneth-cells GSM116350 CEL  
24-paneth-cells GSM116359 CEL  
23-paneth-cells GSM318589 CEL  
22-paneth-cells GSM318590 CEL  
21-Colon-Crypt GSM480375 cel  
20-Colon-Crypt GSM480374 cel  
19-Colon-Vill GSM480363 cel  
18-Colon-Vill GSM480362 cel  
17-Colon-IEC-GE GSM349880 CEL  
16-Colon-IEC-GE GSM350375 CEL  
15-Ileum-IEC GSM350376 CEL  
14-Ileum-IEC GSM350371 CEL  
13-Small-intestine-epithelium RMINEP002001 CEL  
12-Small-intestine-epithelium RMINEP001001 CEL  
11-FAE RMPYEP002001 CEL  
10-FAE RMPYEP001001 CEL  
09-Ileum-IEC GSM190797 CEL  
08-Ileum-IEC GSM190796 CEL  
07-Ileum-IEC GSM190795 CEL  
06-CT-v-M-cells GSM190794 CEL  
05-CT-v-M-cells GSM190793 CEL  
04-PP-M-cells GSM190792 CEL  
03-PP-M-cells GSM190791 CEL  
02-PP-M-cells GSM190790 CEL  
01-PP-M-cells GSM190789 CEL



Cluster0265\_High in T cells and NH cells (8 nodes)

711.6  
674.1  
636.7  
599.2  
561.8  
524.3  
486.9  
449.4  
412  
374.5  
337.1  
299.6  
262.2  
224.7  
187.3  
149.8  
112.4  
74.9  
37.5  
0

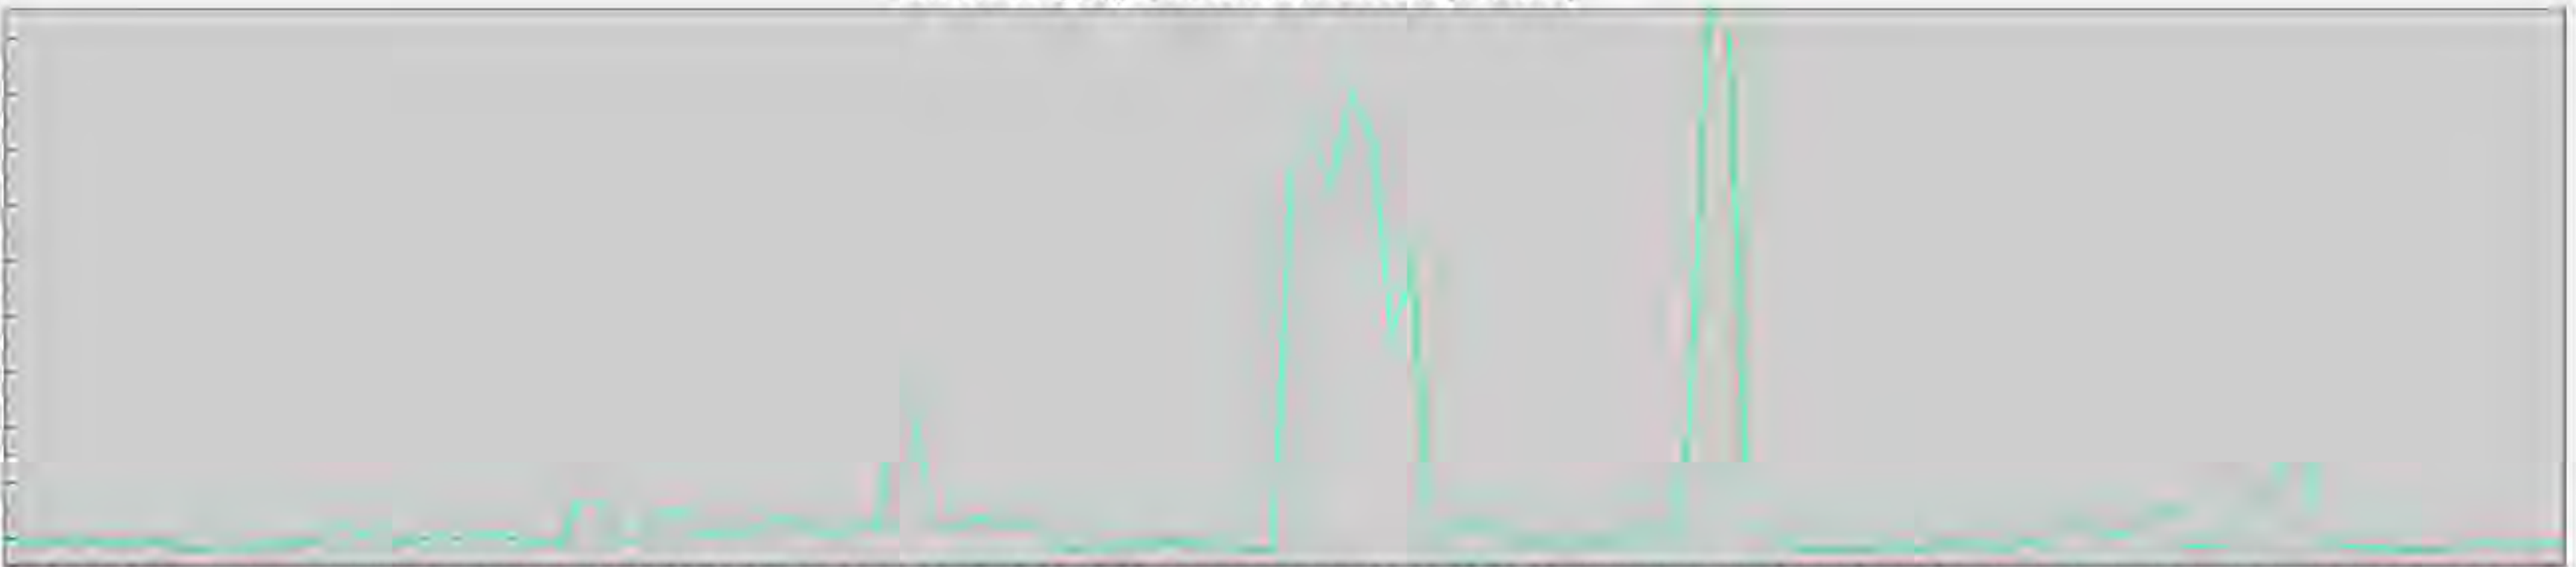

130- NALT GSM289411 CELL  
 129- NALT GSM289410 CELL  
 128- NALT GSM289409 CELL  
 127- NALT GSM289408 CELL  
 126- Colon-d9 GSM1988105 CELL  
 125- Colon-d9 GSM1988104 CELL  
 124- Colon-d9 GSM1988103 CELL  
 123- Colon-d4 GSM1988102 CELL  
 122- Colon-d4 GSM1988101 CELL  
 121- Intestine-large GSM258676 CELL  
 120- Intestine-large GSM258675 CELL  
 119- Intestine-small GSM258678 CELL  
 118- Intestine-small GSM258679 CELL  
 117- Lymph-nodes GSM258691 CELL  
 116- Lymph-nodes GSM258726 CELL  
 115- Spleen GSM258767 CELL  
 114- Spleen GSM258768 CELL  
 113- Neuro2a GSM258728 CELL  
 112- Neuro2a GSM258729 CELL  
 111- Astrocytes GSM241898 CELL  
 110- mimb GSM258725 CELL  
 109- mimb GSM258724 CELL  
 108- MIMCD3 GSM258723 CELL  
 107- MIMCD3 GSM258722 CELL  
 106- Bruce4 GSM258656 CELL  
 105- Bruce4 GSM258655 CELL  
 104- C2C12 GSM258690 CELL  
 103- C2C12 GSM258689 CELL  
 102- NIH3T3 GSM258730 CELL  
 101- NIH3T3 GSM258729 CELL  
 100- 3T3-L1 GSM258610 CELL  
 99- 3T3-L1 GSM258609 CELL  
 98- 10T1/2 GSM258632 CELL  
 97- 10T1/2 GSM258631 CELL  
 96- Osteoblast-d21 GSM258740 CELL  
 95- Osteoblast-d21 GSM258739 CELL  
 94- Osteoblast-d14 GSM258738 CELL  
 93- Osteoblast-d14 GSM258737 CELL  
 92- Osteoblast-d5 GSM258742 CELL  
 91- Osteoblast-d5 GSM258741 CELL  
 90- Chondrocytes GSM266741 CELL  
 89- Chondrocytes GSM266740 CELL  
 88- Nat Helper cell GSM465594 CELL  
 87- Nat Helper cell GSM465593 CELL  
 86- Tt cell GSM465596 CELL  
 85- MS-1 GSM234692 CELL  
 84- Lymph-endo-cells GSM143704 CELL  
 83- PP-FDC GSM481977 CELL  
 82- PP-FDC GSM481978 CELL  
 81- PP-FDC GSM481976 CELL  
 80- FLY RMLNDCC003001 CELL  
 79- FLY RMLNDCC003001 CELL  
 78- Follicular-Bcells GSM258664 CELL  
 77- Follicular-Bcells GSM258663 CELL  
 76- MZ-Bcell GSM258627 CELL  
 75- MZ-Bcell GSM258621 CELL  
 74- BAF3 GSM258620 CELL  
 73- BAF3 GSM258619 CELL  
 72- Tregs GSM258778 CELL  
 71- Tregs GSM258777 CELL  
 70- T-cells-CD8+ GSM258776 CELL  
 69- T-cells-CD8+ GSM258775 CELL  
 68- T-cells-CD4+ GSM258774 CELL  
 67- T-cells-CD4+ GSM258773 CELL  
 66- Thymocyte-DN GSM465595 CELL  
 65- Osteoclasts GSM258744 CELL  
 64- Microglia GSM258721 CELL  
 63- Microglia GSM258721 CELL  
 62- MM-LPS-7h GSM258706 CELL  
 61- MM-LPS-7h GSM258706 CELL  
 60- MM-LPS-6h GSM258702 CELL  
 59- MM-LPS-6h GSM258701 CELL  
 58- MM-LPS-6h GSM258699 CELL  
 57- MM-LPS-6h GSM258699 CELL  
 56- MM-LPS-6h GSM258694 CELL  
 55- MM-LPS-6h GSM258694 CELL  
 54- Plasmacytoid-DC GSM258650 CELL  
 53- Plasmacytoid-DC GSM258649 CELL  
 52- CD8a-DC GSM258647 CELL  
 51- CD8a-DC GSM258647 CELL  
 50- CD8a+DC GSM258646 CELL  
 49- CD8a+DC GSM258646 CELL  
 48- NK-cells GSM258732 CELL  
 47- NK-cells GSM258731 CELL  
 46- Mast-cells-IgE+Ad GSM258719 CELL  
 45- Mast-cells-IgE+Ad GSM258718 CELL  
 44- Mast-cells-IgE GSM258714 CELL  
 43- Mast-cells-IgE GSM258713 CELL  
 42- Mast-cells-IgE GSM258712 CELL  
 41- Mast-cells GSM258711 CELL  
 40- Granulocytes GSM258667 CELL  
 39- Granulocytes GSM258667 CELL  
 38- GMP GSM258666 CELL  
 37- GMP GSM258666 CELL  
 36- GMP GSM258665 CELL  
 35- CMP GSM258642 CELL  
 34- CMP GSM258642 CELL  
 33- MIEP GSM258720 CELL  
 32- MIEP GSM258719 CELL  
 31- HESC GSM258770 CELL  
 30- HESC GSM258769 CELL  
 29- Bone marrow GSM258628 CELL  
 28- Bone marrow GSM258627 CELL  
 27- Paneth-cells-GF-1 GSM116357 CELL  
 26- Paneth-cells-GF-1 GSM116350 CELL  
 25- Paneth-cells GSM116350 CELL  
 24- Paneth-cells GSM116359 CELL  
 23- Paneth-cells GSM318589 CELL  
 22- Paneth-cells GSM318590 CELL  
 21- Colon-Crypt GSM480375 cel  
 20- Colon-Crypt GSM480374 cel  
 19- Colon-Vill GSM480363 cel  
 18- Colon-Vill GSM480362 cel  
 17- Colon-IEC-GF GSM349880 CELL  
 16- Colon-IEC-GF GSM350375 CELL  
 15- Ileum-IEC-GF GSM350376 CELL  
 14- Ileum-IEC GSM350371 CELL  
 13- Small-intestine-epithelium RMINEP002001 CELL  
 12- Small-intestine-epithelium RMINEP001001 CELL  
 11- FAE-RMPYEP002001 CELL  
 10- FAE-RMPYEP001001 CELL  
 09- Ileum-IEC GSM190797 CELL  
 08- Ileum-IEC GSM190796 CELL  
 07- Ileum-IEC GSM190795 CELL  
 06- CT-v-M-cells GSM190794 CELL  
 05- CT-v-M-cells GSM190793 CELL  
 04- CT-v-M-cells GSM190792 CELL  
 03- PP-M-cells GSM190791 CELL  
 02- PP-M-cells GSM190790 CELL  
 01- PP-M-cells GSM190789 CELL



Cluster0266\_House keeping-cell cycle (8 nodes)

1,319.8  
1,250.3  
1,180.9  
1,111.4  
1,041.9  
972.5  
903  
833.6  
764.1  
694.6  
625.2  
555.7  
486.2  
416.8  
347.3  
277.9  
208.4  
138.9  
69.5  
0

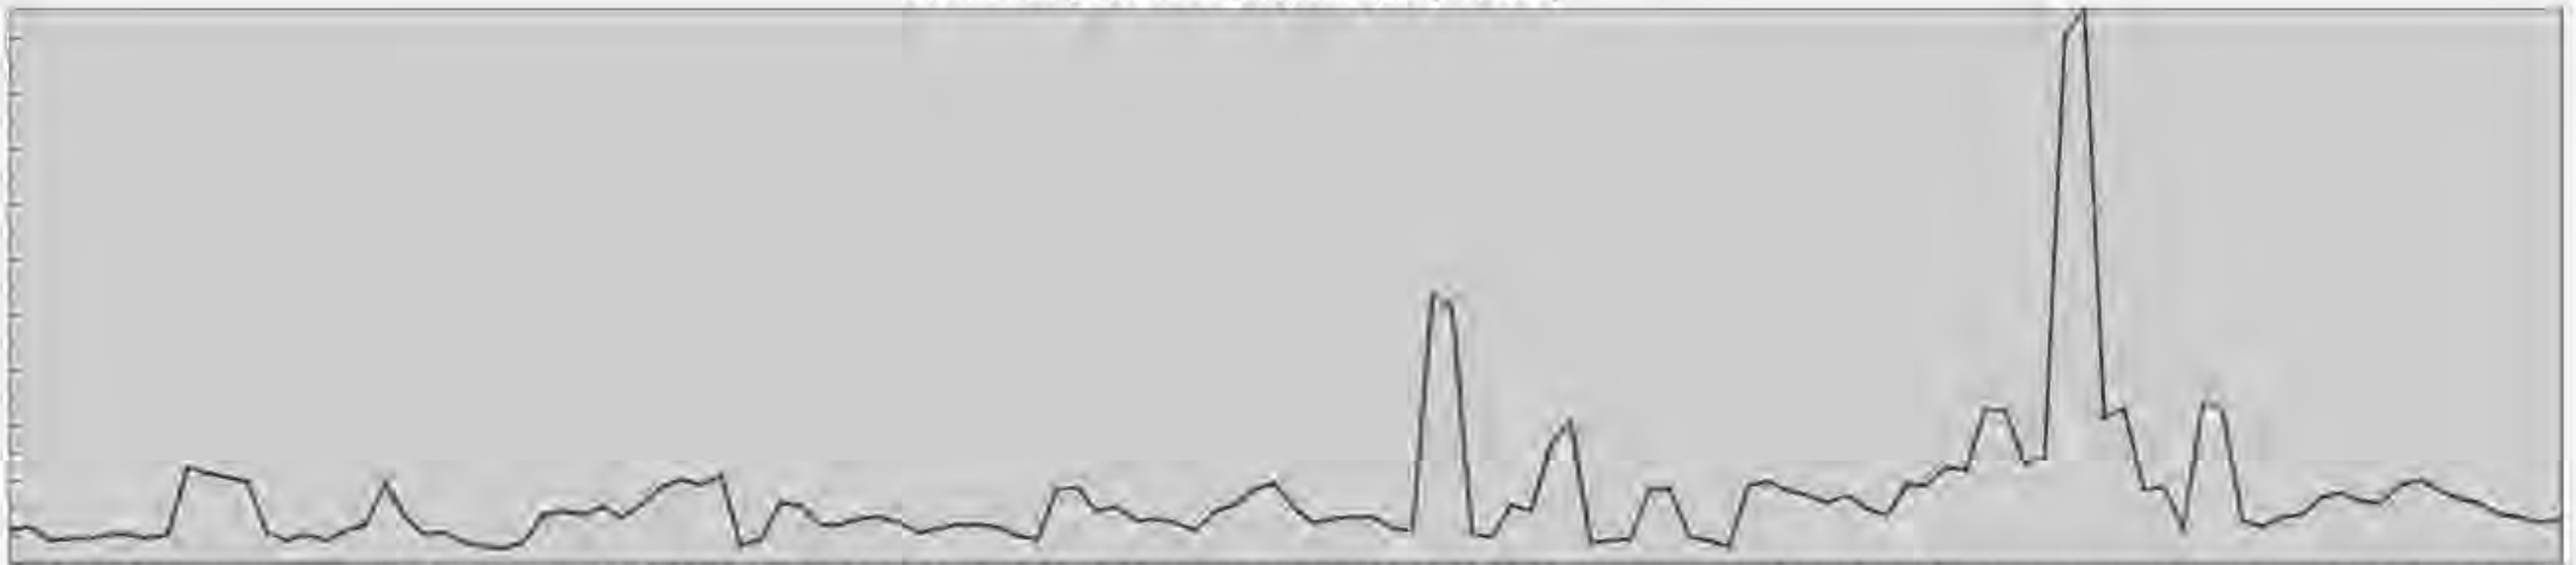

01-PP-M-cells\_GSM190789.CEL  
02-PP-M-cells\_GSM190790.CEL  
03-PP-M-cells\_GSM190791.CEL  
04-PP-M-cells\_GSM190792.CEL  
05-CT-V-M-cells\_GSM190793.CEL  
06-CT-V-M-cells\_GSM190794.CEL  
07-Ileum-IEC\_GSM190795.CEL  
08-Ileum-IEC\_GSM190796.CEL  
09-Ileum-IEC\_GSM190797.CEL  
10-FAE-RMPYE001001.CEL  
11-FAE-RMPYE002001.CEL  
12-Small-intestine-epithelium\_RMINEP001001.CEL  
13-Small-intestine-epithelium\_RMINEP002001.CEL  
14-Ileum-IEC\_GSM350371.CEL  
15-Ileum-IEC\_GSM350375.CEL  
16-Colon-IEC-Gf\_GSM350375.CEL  
17-Colon-IEC-Gf\_GSM349880.CEL  
18-Colon-Vill-GSM480362.CEL  
19-Colon-Vill-GSM480363.CEL  
20-Colon-Crypt\_GSM480374.CEL  
21-Colon-Crypt\_GSM480375.CEL  
22-Paneth-cells\_GSM318590.CEL  
23-Paneth-cells\_GSM318589.CEL  
24-Paneth-cells\_GSM116359.CEL  
25-Paneth-cells\_GSM116350.CEL  
26-Paneth-cells-Gf-1-GSM116357.CEL  
27-Paneth-cells-Gf-1-GSM116358.CEL  
28-Paneth-cells-Gf-1-GSM116359.CEL  
29-Bone marrow\_GSM258627.CEL  
30-HSC\_GSM258770.CEL  
31-HSC\_GSM258771.CEL  
32-MEP\_GSM258770.CEL  
33-MEP\_GSM258771.CEL  
34-MEP\_GSM258642.CEL  
35-MEP\_GSM258642.CEL  
36-MEP\_GSM258642.CEL  
37-MEP\_GSM258642.CEL  
38-Granulocytes\_GSM258667.CEL  
39-Granulocytes\_GSM258667.CEL  
40-Mast-cells\_GSM258712.CEL  
41-Mast-cells\_GSM258712.CEL  
42-Mast-cells-Gf-GSM258712.CEL  
43-Mast-cells-Gf-GSM258712.CEL  
44-Mast-cells-Gf-GSM258712.CEL  
45-Mast-cells-Gf-GSM258712.CEL  
46-NK-cells\_GSM258732.CEL  
47-NK-cells\_GSM258732.CEL  
48-CD8a+DC\_GSM258646.CEL  
49-CD8a+DC\_GSM258646.CEL  
50-CD8a+DC\_GSM258647.CEL  
51-CD8a+DC\_GSM258647.CEL  
52-CD8a+DC\_GSM258647.CEL  
53-CD8a+DC\_GSM258647.CEL  
54-CD8a+DC\_GSM258647.CEL  
55-CD8a+DC\_GSM258647.CEL  
56-CD8a+DC\_GSM258647.CEL  
57-CD8a+DC\_GSM258647.CEL  
58-CD8a+DC\_GSM258647.CEL  
59-CD8a+DC\_GSM258647.CEL  
60-CD8a+DC\_GSM258647.CEL  
61-CD8a+DC\_GSM258647.CEL  
62-Microglia\_GSM258721.CEL  
63-Microglia\_GSM258721.CEL  
64-Microglia\_GSM258721.CEL  
65-Osteoclasts\_GSM258743.CEL  
66-Osteoclasts\_GSM258743.CEL  
67-T-cells-CD4+GSM258773.CEL  
68-T-cells-CD4+GSM258773.CEL  
69-T-cells-CD4+GSM258774.CEL  
70-T-cells-CD4+GSM258774.CEL  
71-T-cells-CD4+GSM258774.CEL  
72-T-cells-CD4+GSM258774.CEL  
73-Tregs\_GSM258778.CEL  
74-Tregs\_GSM258778.CEL  
75-Tregs\_GSM258778.CEL  
76-MZ-Bcell\_GSM258622.CEL  
77-MZ-Bcell\_GSM258622.CEL  
78-MZ-Bcell\_GSM258622.CEL  
79-Follicular-Bcells\_GSM258664.CEL  
80-Follicular-Bcells\_GSM258664.CEL  
81-Follicular-Bcells\_GSM258664.CEL  
82-PP-FDC\_GSM481976.CEL  
83-PP-FDC\_GSM481976.CEL  
84-PP-FDC\_GSM481976.CEL  
85-MS-1\_GSM234692.CEL  
86-LT-cell\_GSM465596.CEL  
87-Nat Helper cell\_GSM465593.CEL  
88-Nat Helper cell\_GSM465593.CEL  
89-Nat Helper cell\_GSM465593.CEL  
90-Chondrocytes\_GSM258741.CEL  
91-Chondrocytes\_GSM258741.CEL  
92-Osteoblast-d5\_GSM258741.CEL  
93-Osteoblast-d14\_GSM258737.CEL  
94-Osteoblast-d21\_GSM258738.CEL  
95-Osteoblast-d21\_GSM258738.CEL  
96-Osteoblast-d21\_GSM258738.CEL  
97-OT12\_GSM258631.CEL  
98-OT12\_GSM258631.CEL  
99-3T3-L1\_GSM258609.CEL  
100-3T3-L1\_GSM258610.CEL  
101-NH3T3\_GSM258729.CEL  
102-NH3T3\_GSM258729.CEL  
103-C2C12\_GSM258629.CEL  
104-C2C12\_GSM258629.CEL  
105-Bruce4\_GSM258656.CEL  
106-Bruce4\_GSM258656.CEL  
107-MIMCD3\_GSM258723.CEL  
108-MIMCD3\_GSM258723.CEL  
109-mim6\_GSM258725.CEL  
110-mim6\_GSM258725.CEL  
111-Astrocytes\_GSM241898.CEL  
112-Astrocytes\_GSM241898.CEL  
113-Spleen\_GSM258766.CEL  
114-Spleen\_GSM258766.CEL  
115-Spleen\_GSM258766.CEL  
116-Lymph-nodes\_GSM258691.CEL  
117-Lymph-nodes\_GSM258691.CEL  
118-Intestine-small\_GSM258677.CEL  
119-Intestine-small\_GSM258677.CEL  
120-Intestine-large\_GSM258675.CEL  
121-Intestine-large\_GSM258675.CEL  
122-Intestine-large\_GSM258675.CEL  
123-Colon-d4\_GSM198810.CEL  
124-Colon-d4\_GSM198810.CEL  
125-Colon-d9\_GSM198810.CEL  
126-Colon-d9\_GSM198810.CEL  
127-NALT\_GSM289408.CEL  
128-NALT\_GSM289408.CEL  
129-NALT\_GSM289410.CEL  
130-NALT\_GSM289411.CEL



Cluster0267\_Uncertain-low in many (8 nodes)

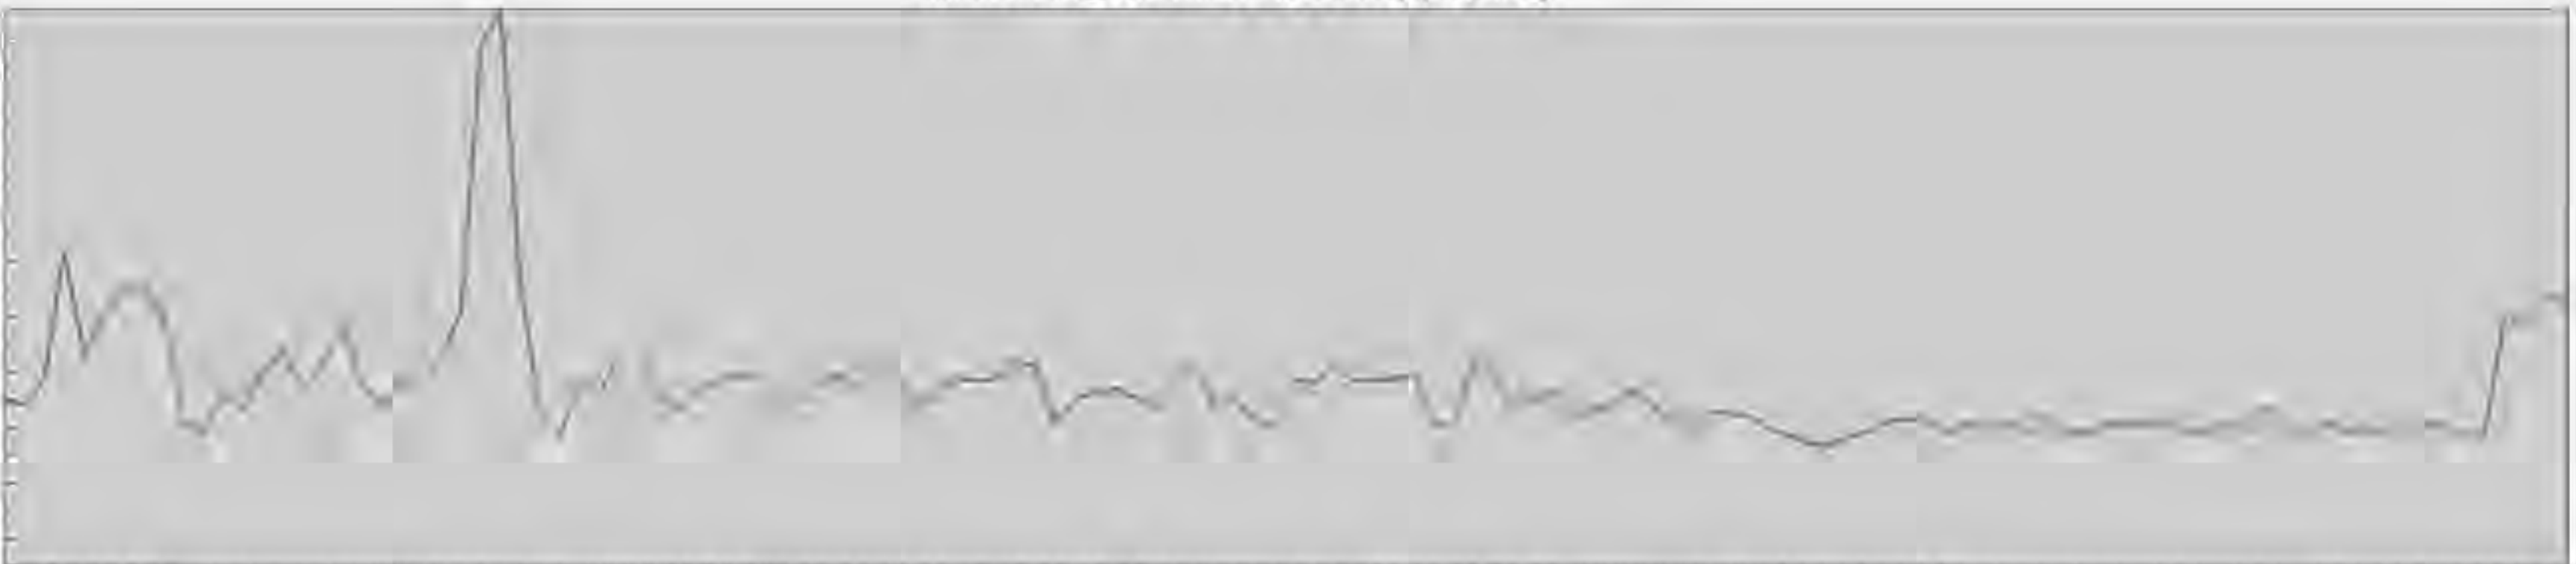

|     |                            |              |     |
|-----|----------------------------|--------------|-----|
| 01  | PP-M-cells                 | GSM190789    | CEL |
| 02  | PP-M-cells                 | GSM190790    | CEL |
| 03  | PP-M-cells                 | GSM190791    | CEL |
| 04  | CT-Y-M-cells               | GSM190792    | CEL |
| 05  | CT-Y-M-cells               | GSM190793    | CEL |
| 06  | CT-W-M-cells               | GSM190794    | CEL |
| 07  | Ileum-IEC                  | GSM190795    | CEL |
| 08  | Ileum-IEC                  | GSM190796    | CEL |
| 09  | Ileum-IEC                  | GSM190797    | CEL |
| 10  | FAE-RMP                    | GSM190798    | CEL |
| 11  | FAE-RMP                    | GSM190799    | CEL |
| 12  | Small-intestine-epithelium | RMINEP001001 | CEL |
| 13  | Small-intestine-epithelium | RMINEP002001 | CEL |
| 14  | Ileum-IEC                  | GSM350371    | CEL |
| 15  | Colon-IEC                  | GSM350375    | CEL |
| 16  | Colon-VIII                 | GSM480362    | cel |
| 17  | Colon-VIII                 | GSM480363    | cel |
| 18  | Colon-VIII                 | GSM480364    | cel |
| 19  | Colon-Crypt                | GSM480374    | cel |
| 20  | Colon-Crypt                | GSM480375    | cel |
| 21  | Colon-Crypt                | GSM480376    | cel |
| 22  | Paneth-cells               | GSM318659    | CEL |
| 23  | Paneth-cells               | GSM318690    | CEL |
| 24  | Paneth-cells               | GSM116350    | CEL |
| 25  | Paneth-cells               | GSM116351    | CEL |
| 26  | Paneth-cells               | GSM116352    | CEL |
| 27  | Paneth-cells               | GSM116353    | CEL |
| 28  | Paneth-cells               | GSM116354    | CEL |
| 29  | Bone marrow                | GSM258627    | CEL |
| 30  | HS                         | GSM258770    | CEL |
| 31  | HS                         | GSM258771    | CEL |
| 32  | MEP                        | GSM258772    | CEL |
| 33  | MEP                        | GSM258773    | CEL |
| 34  | MEP                        | GSM258774    | CEL |
| 35  | MEP                        | GSM258775    | CEL |
| 36  | GMP                        | GSM258665    | CEL |
| 37  | GMP                        | GSM258666    | CEL |
| 38  | GMP                        | GSM258667    | CEL |
| 39  | Granulocytes               | GSM258668    | CEL |
| 40  | Mast-cells                 | GSM258712    | CEL |
| 41  | Mast-cells                 | GSM258713    | CEL |
| 42  | Mast-cells                 | GSM258714    | CEL |
| 43  | Mast-cells                 | GSM258715    | CEL |
| 44  | Mast-cells                 | GSM258716    | CEL |
| 45  | Mast-cells                 | GSM258717    | CEL |
| 46  | NK-cells                   | GSM258731    | CEL |
| 47  | NK-cells                   | GSM258732    | CEL |
| 48  | CD8a+DC                    | GSM258646    | CEL |
| 49  | CD8a+DC                    | GSM258647    | CEL |
| 50  | CD8a-DC                    | GSM258647    | CEL |
| 51  | CD8a-DC                    | GSM258648    | CEL |
| 52  | CD8a-DC                    | GSM258649    | CEL |
| 53  | Plasmacytoid-DC            | GSM258650    | CEL |
| 54  | MM                         | GSM258694    | CEL |
| 55  | MM                         | GSM258694    | CEL |
| 56  | MM                         | GSM258694    | CEL |
| 57  | MM                         | GSM258702    | CEL |
| 58  | MM                         | GSM258702    | CEL |
| 59  | MM                         | GSM258702    | CEL |
| 60  | MM                         | GSM258702    | CEL |
| 61  | MM                         | GSM258706    | CEL |
| 62  | Microglia                  | GSM258721    | CEL |
| 63  | Microglia                  | GSM258721    | CEL |
| 64  | Microglia                  | GSM258721    | CEL |
| 65  | Osteoclasts                | GSM258743    | CEL |
| 66  | Thymocyte-DN               | GSM465595    | CEL |
| 67  | T-cells-CD4+               | GSM258773    | CEL |
| 68  | T-cells-CD4+               | GSM258773    | CEL |
| 69  | T-cells-CD8+               | GSM258774    | CEL |
| 70  | T-cells-CD8+               | GSM258774    | CEL |
| 71  | Tregs                      | GSM258778    | CEL |
| 72  | Tregs                      | GSM258778    | CEL |
| 73  | BAF3                       | GSM258620    | CEL |
| 74  | BAF3                       | GSM258620    | CEL |
| 75  | MZ-Bcell                   | GSM258621    | CEL |
| 76  | MZ-Bcell                   | GSM258621    | CEL |
| 77  | Follicular-Bcells          | GSM258664    | CEL |
| 78  | Follicular-Bcells          | GSM258664    | CEL |
| 79  | F-LY                       | RMLNDC002001 | CEL |
| 80  | F-LY                       | RMLNDC003001 | CEL |
| 81  | PP-FDC                     | GSM481976    | CEL |
| 82  | PP-FDC                     | GSM481978    | CEL |
| 83  | PP-FDC                     | GSM481978    | CEL |
| 84  | Lymph-endo-cells           | GSM143704    | CEL |
| 85  | MS-1                       | GSM234692    | CEL |
| 86  | Tt cell                    | GSM465596    | CEL |
| 87  | Nat Helper cell            | GSM465593    | CEL |
| 88  | Nat Helper cell            | GSM465594    | CEL |
| 89  | Chondrocytes               | GSM266741    | CEL |
| 90  | Chondrocytes               | GSM266741    | CEL |
| 91  | Osteoblast-d5              | GSM258741    | CEL |
| 92  | Osteoblast-d5              | GSM258742    | CEL |
| 93  | Osteoblast-d14             | GSM258737    | CEL |
| 94  | Osteoblast-d14             | GSM258738    | CEL |
| 95  | Osteoblast-d21             | GSM258740    | CEL |
| 96  | Osteoblast-d21             | GSM258739    | CEL |
| 97  | OT12                       | GSM258631    | CEL |
| 98  | OT12                       | GSM258632    | CEL |
| 99  | OT12                       | GSM258609    | CEL |
| 100 | 3T3-L1                     | GSM258610    | CEL |
| 101 | NH3T3                      | GSM258739    | CEL |
| 102 | NH3T3                      | GSM258739    | CEL |
| 103 | C2C12                      | GSM258629    | CEL |
| 104 | C2C12                      | GSM258630    | CEL |
| 105 | Bruce4                     | GSM258656    | CEL |
| 106 | Bruce4                     | GSM258656    | CEL |
| 107 | MIMCD3                     | GSM258723    | CEL |
| 108 | MIMCD3                     | GSM258723    | CEL |
| 109 | mim6                       | GSM258725    | CEL |
| 110 | mim6                       | GSM258726    | CEL |
| 111 | Astrocytes                 | GSM241898    | CEL |
| 112 | Spleen                     | GSM258768    | CEL |
| 113 | Spleen                     | GSM258767    | CEL |
| 114 | Neuro2a                    | GSM258728    | CEL |
| 115 | Neuro2a                    | GSM258728    | CEL |
| 116 | Lymph-nodes                | GSM258691    | CEL |
| 117 | Lymph-nodes                | GSM258691    | CEL |
| 118 | Intestine-small            | GSM258677    | CEL |
| 119 | Intestine-large            | GSM258678    | CEL |
| 120 | Intestine-large            | GSM258675    | CEL |
| 121 | Intestine-large            | GSM258676    | CEL |
| 122 | Colon-d4                   | GSM198810    | CEL |
| 123 | Colon-d4                   | GSM198810    | CEL |
| 124 | Colon-d9                   | GSM198810    | CEL |
| 125 | Colon-d9                   | GSM198810    | CEL |
| 126 | Colon-d9                   | GSM198810    | CEL |
| 127 | NALT                       | GSM289408    | CEL |
| 128 | NALT                       | GSM289409    | CEL |
| 129 | NALT                       | GSM289410    | CEL |
| 130 | NALT                       | GSM289411    | CEL |



Cluster0268\_House keeping-cell cycle (8 nodes)

2,602.6  
2,465.7  
2,328.7  
2,191.7  
2,054.7  
1,917.7  
1,780.8  
1,643.8  
1,506.8  
1,369.8  
1,232.8  
1,095.8  
958.9  
821.9  
684.9  
547.9  
410.9  
274  
137  
0

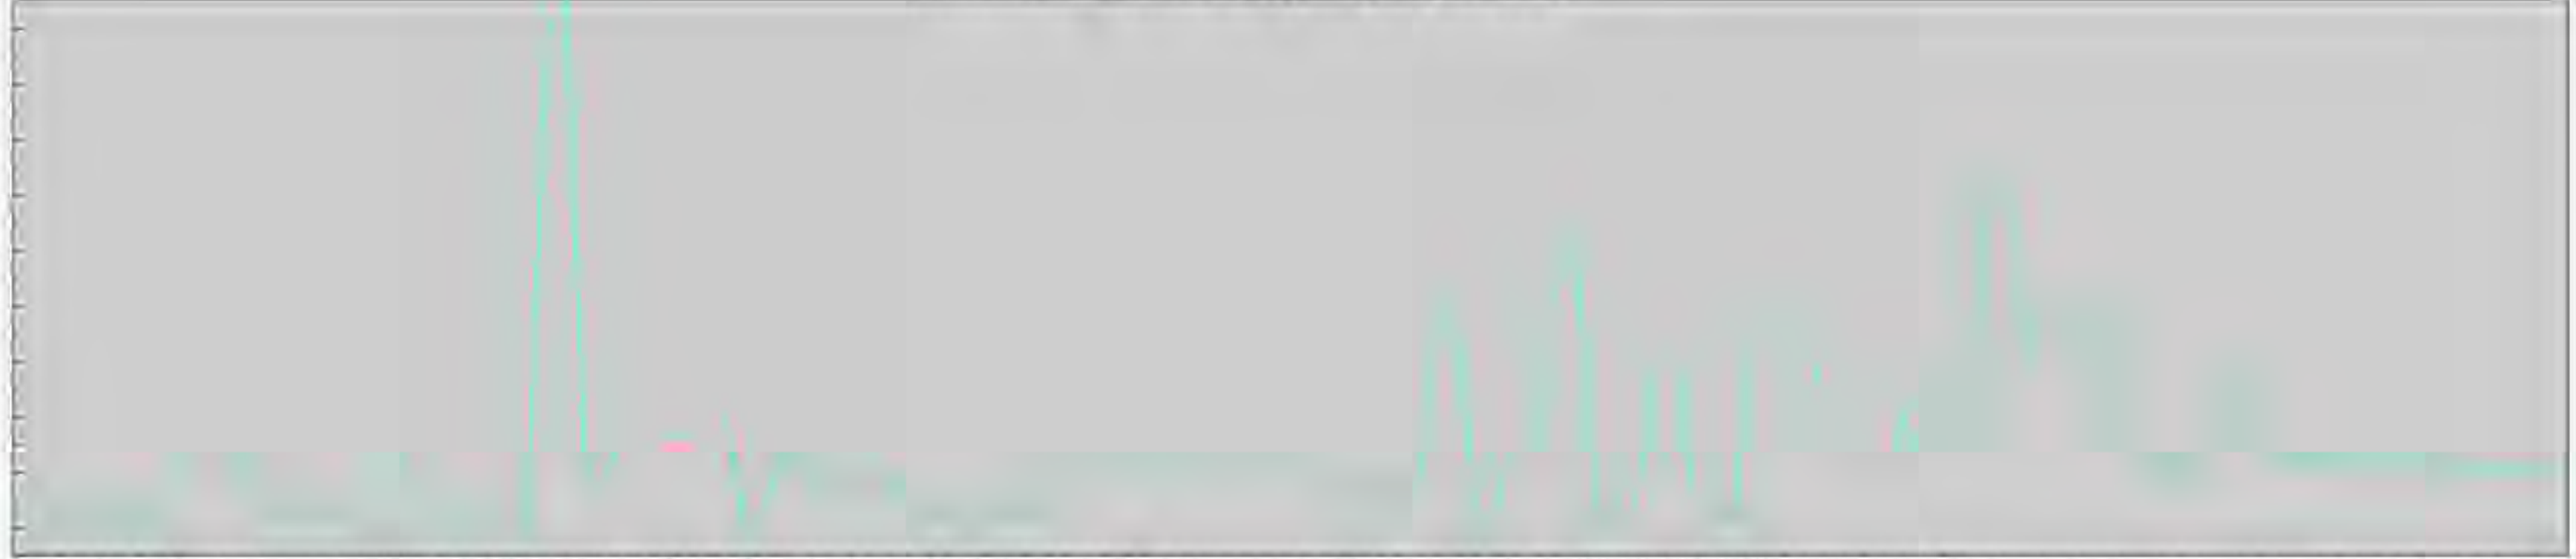

130-NALT GSM289411.CEL  
129-NALT GSM289410.CEL  
128-NALT GSM289409.CEL  
127-NALT GSM289408.CEL  
126-Colon-d9 GSM1988105.CEL  
125-Colon-d9 GSM1988104.CEL  
124-Colon-d9 GSM1988103.CEL  
123-Colon-d4 GSM1988102.CEL  
122-Colon-d4 GSM1988101.CEL  
121-Intestine-large GSM258676.CEL  
120-Intestine-large GSM258675.CEL  
119-Intestine-small GSM258678.CEL  
118-Intestine-small GSM258677.CEL  
117-Lymph-nodes GSM258691.CEL  
116-Lymph-nodes GSM258726.CEL  
115-Spleen GSM258767.CEL  
114-Spleen GSM258767.CEL  
113-Neuro2a GSM258727.CEL  
112-Neuro2a GSM241898.CEL  
111-Astrocytes GSM241898.CEL  
110-mim6 GSM258726.CEL  
109-mim6 GSM258725.CEL  
108-MIMCD3 GSM258724.CEL  
107-MIMCD3 GSM258723.CEL  
106-Bruce4 GSM258656.CEL  
105-Bruce4 GSM258656.CEL  
104-C2C12 GSM258690.CEL  
103-C2C12 GSM258629.CEL  
102-NH3T3 GSM258739.CEL  
101-NH3T3 GSM258739.CEL  
100-3T3-L1 GSM258610.CEL  
99-3T3-L1 GSM258609.CEL  
98-10T12 GSM258631.CEL  
97-10T12 GSM258631.CEL  
96-Osteoblast-d21 GSM258740.CEL  
95-Osteoblast-d21 GSM258739.CEL  
94-Osteoblast-d14 GSM258738.CEL  
93-Osteoblast-d14 GSM258737.CEL  
92-Osteoblast-d5 GSM258742.CEL  
91-Osteoblast-d5 GSM258741.CEL  
90-Chondrocytes GSM266741.CEL  
89-Chondrocytes GSM266740.CEL  
88-Nat Helper cell GSM465594.CEL  
87-Nat Helper cell GSM465593.CEL  
86-TT cell GSM465596.CEL  
85-MS-1 GSM234692.CEL  
84-Lymph-endo-cells GSM143704.CEL  
83-PP-FDC GSM481977.CEL  
82-PP-FDC GSM481978.CEL  
81-PP-FDC GSM481976.CEL  
80-F-LY RMLNDCC003001.CEL  
79-F-LY RMLNDCC003001.CEL  
78-Follicular-Bcells GSM258664.CEL  
77-Follicular-Bcells GSM258663.CEL  
76-MZ-Bcell GSM258627.CEL  
75-MZ-Bcell GSM258627.CEL  
74-BAF3 GSM258620.CEL  
73-BAF3 GSM258619.CEL  
72-Tregs GSM258778.CEL  
71-Tregs GSM258777.CEL  
70-T-cells-CD8+ GSM258776.CEL  
69-T-cells-CD8+ GSM258774.CEL  
68-T-cells-CD4+ GSM258773.CEL  
67-T-cells-CD4+ GSM258773.CEL  
66-Thymocyte-DN GSM465595.CEL  
65-Osteoclasts GSM258743.CEL  
64-Osteoclasts GSM258743.CEL  
63-Microglia GSM258721.CEL  
62-Microglia GSM258721.CEL  
61-PM-M-PS-7h GSM258706.CEL  
60-PM-M-PS-7h GSM258706.CEL  
59-PM-M-PS-6h GSM258702.CEL  
58-PM-M-PS-6h GSM258702.CEL  
57-BMM-LPS-6h GSM258699.CEL  
56-BMM-LPS-6h GSM258699.CEL  
55-BMM-LPS-6h GSM258699.CEL  
54-BMM-LPS-6h GSM258699.CEL  
53-Plasmacytoid-DC GSM258650.CEL  
52-Plasmacytoid-DC GSM258649.CEL  
51-CD8a-DC GSM258647.CEL  
50-CD8a-DC GSM258647.CEL  
49-CD8a+DC GSM258646.CEL  
48-CD8a+DC GSM258646.CEL  
47-NK-cells GSM258737.CEL  
46-NK-cells GSM258737.CEL  
45-Mast-cells-IgE+Ad GSM258718.CEL  
44-Mast-cells-IgE+Ad GSM258717.CEL  
43-Mast-cells-IgE GSM258714.CEL  
42-Mast-cells-IgE GSM258713.CEL  
41-Mast-cells GSM258712.CEL  
40-Granulocytes GSM258668.CEL  
39-Granulocytes GSM258667.CEL  
38-GMP GSM258666.CEL  
37-GMP GSM258666.CEL  
36-GMP GSM258666.CEL  
35-GMP GSM258642.CEL  
34-GMP GSM258642.CEL  
33-MEP GSM258720.CEL  
32-MEP GSM258719.CEL  
31-HESC GSM258770.CEL  
30-HESC GSM258770.CEL  
29-Bone marrow GSM258628.CEL  
28-Bone marrow GSM258627.CEL  
27-paneth-cells-GE GSM116358.CEL  
26-paneth-cells-GE GSM116357.CEL  
25-paneth-cells GSM116350.CEL  
24-paneth-cells GSM116359.CEL  
23-paneth-cells GSM318589.CEL  
22-paneth-cells GSM318590.CEL  
21-Colon-Crypt GSM480375.CEL  
20-Colon-Crypt GSM480374.CEL  
19-Colon-Vill GSM480363.CEL  
18-Colon-Vill GSM480362.CEL  
17-Colon-IEC-Gf GSM349880.CEL  
16-Colon-IEC-Gf GSM350375.CEL  
15-Ileum-IEC-Gf GSM350376.CEL  
14-Ileum-IEC GSM350371.CEL  
13-Small-intestine-epithelium RMINEP002901.CEL  
12-Small-intestine-epithelium RMINEP001001.CEL  
11-FAE-RMPYEP002001.CEL  
10-FAE-RMPYEP001001.CEL  
09-Ileum-IEC GSM190797.CEL  
08-Ileum-IEC GSM190796.CEL  
07-Ileum-IEC GSM190795.CEL  
06-CT-v-M-cells GSM190794.CEL  
05-CT-v-M-cells GSM190793.CEL  
04-PP-M-cells GSM190792.CEL  
03-PP-M-cells GSM190791.CEL  
02-PP-M-cells GSM190790.CEL  
01-PP-M-cells GSM190789.CEL



Cluster0269\_Uncertain-low in many (8 nodes)

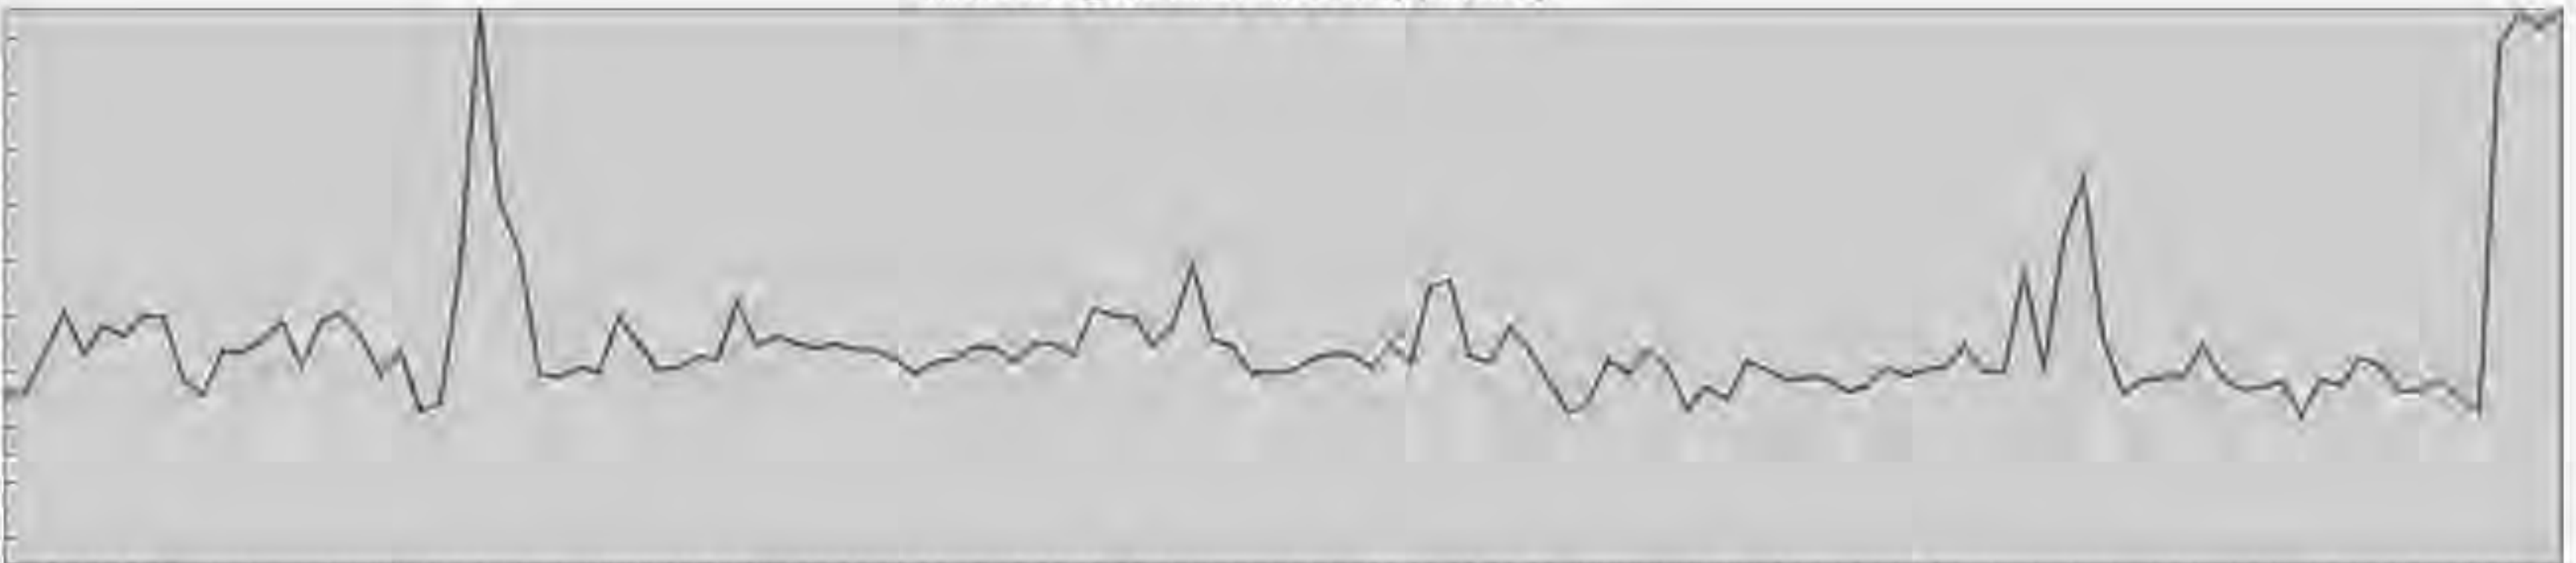

01-PP-M-cells\_GSM190789.CEL  
 02-PP-M-cells\_GSM190790.CEL  
 03-PP-M-cells\_GSM190791.CEL  
 04-CT-v-M-cells\_GSM190792.CEL  
 05-CT-v-M-cells\_GSM190793.CEL  
 06-CT-v-M-cells\_GSM190794.CEL  
 07-Ileum-IEC\_GSM190795.CEL  
 08-Ileum-IEC\_GSM190796.CEL  
 09-Ileum-IEC\_GSM190797.CEL  
 10-FAE-RMPYEP001001.CEL  
 11-FAE-RMPYEP002001.CEL  
 12-Small-intestine-epithelium\_RMINEP001001.CEL  
 13-Small-intestine-epithelium\_RMINEP002001.CEL  
 14-Ileum-IEC\_GSM350371.CEL  
 15-Ileum-IEC\_GSM350375.CEL  
 16-Colon-IEC-Gf\_GSM349880.CEL  
 17-Colon-IEC-Gf\_GSM350375.CEL  
 18-Colon-Vill-GSM480362.CEL  
 19-Colon-Vill-GSM480363.CEL  
 20-Colon-Crypt-GSM480374.CEL  
 21-Colon-Crypt-GSM480375.CEL  
 22-Paneth-cells-GSM318590.CEL  
 23-Paneth-cells-GSM318591.CEL  
 24-Paneth-cells-GSM116350.CEL  
 25-Paneth-cells-GSM116359.CEL  
 26-Paneth-cells-Gf-GSM116357.CEL  
 27-Paneth-cells-Gf-GSM116358.CEL  
 28-Paneth-cells-Gf-GSM116359.CEL  
 29-Bone marrow\_GSM258628.CEL  
 30-HSC-GSM258770.CEL  
 31-HSC-GSM258771.CEL  
 32-MEP-GSM258772.CEL  
 33-MEP-GSM258773.CEL  
 34-MEP-GSM258774.CEL  
 35-MEP-GSM258775.CEL  
 36-MEP-GSM258776.CEL  
 37-MEP-GSM258777.CEL  
 38-Granulocytes\_GSM258667.CEL  
 39-Granulocytes\_GSM258668.CEL  
 40-Mast-cells\_GSM258712.CEL  
 41-Mast-cells-Gf-GSM258712.CEL  
 42-Mast-cells-Gf-GSM258713.CEL  
 43-Mast-cells-Gf-GSM258714.CEL  
 44-Mast-cells-Gf-GSM258714.CEL  
 45-Mast-cells-Gf-GSM258719.CEL  
 46-NK-cells\_GSM258732.CEL  
 47-NK-cells\_GSM258732.CEL  
 48-CD8a+DC\_GSM258646.CEL  
 49-CD8a+DC\_GSM258646.CEL  
 50-CD8a+DC\_GSM258647.CEL  
 51-CD8a+DC\_GSM258647.CEL  
 52-Plasmacytoid-DC\_GSM258649.CEL  
 53-Plasmacytoid-DC\_GSM258649.CEL  
 54-BMM-GSM258694.CEL  
 55-BMM-GSM258694.CEL  
 56-BMM-LPS-Gf-GSM258699.CEL  
 57-BMM-LPS-Gf-GSM258699.CEL  
 58-BMM-LPS-Gf-GSM258702.CEL  
 59-BMM-LPS-Gf-GSM258702.CEL  
 60-BMM-LPS-Gf-GSM258706.CEL  
 61-BMM-LPS-Gf-GSM258706.CEL  
 62-Microglia\_GSM258721.CEL  
 63-Microglia\_GSM258721.CEL  
 64-Osteoclasts\_GSM258743.CEL  
 65-Osteoclasts\_GSM258743.CEL  
 66-Thymocyte-DN\_GSM465595.CEL  
 67-T-cells-CD4+GSM258773.CEL  
 68-T-cells-CD4+GSM258773.CEL  
 69-T-cells-CD8+GSM258776.CEL  
 70-T-cells-CD8+GSM258776.CEL  
 71-Tregs\_GSM258778.CEL  
 72-Tregs\_GSM258778.CEL  
 73-Tregs\_GSM258819.CEL  
 74-BAF3\_GSM258820.CEL  
 75-MZ-Bcell\_GSM258821.CEL  
 76-MZ-Bcell\_GSM258821.CEL  
 77-Follicular-Bcells\_GSM258864.CEL  
 78-Follicular-Bcells\_GSM258864.CEL  
 79-E-L-Y-RMLNDC002001.CEL  
 80-E-L-Y-RMLNDC003001.CEL  
 81-PP-FDC\_GSM481976.CEL  
 82-PP-FDC\_GSM481976.CEL  
 83-PP-FDC\_GSM481977.CEL  
 84-Lymph-endo-cells\_GSM143704.CEL  
 85-MS-1\_GSM234692.CEL  
 86-LTcell\_GSM465596.CEL  
 87-Nat Helper cell\_GSM465593.CEL  
 88-Nat Helper cell\_GSM465594.CEL  
 89-Chondrocytes\_GSM266741.CEL  
 90-Chondrocytes\_GSM266741.CEL  
 91-Osteoblast-d5\_GSM258741.CEL  
 92-Osteoblast-d5\_GSM258742.CEL  
 93-Osteoblast-d14\_GSM258737.CEL  
 94-Osteoblast-d21\_GSM258738.CEL  
 95-Osteoblast-d21\_GSM258739.CEL  
 96-Osteoblast-d21\_GSM258739.CEL  
 97-10T12\_GSM258631.CEL  
 98-10T12\_GSM258631.CEL  
 99-3T3-L1\_GSM258610.CEL  
 100-3T3-L1\_GSM258610.CEL  
 101-NH3T3\_GSM258729.CEL  
 102-NH3T3\_GSM258729.CEL  
 103-C2C12\_GSM258829.CEL  
 104-Bruce4\_GSM258869.CEL  
 105-Bruce4\_GSM258869.CEL  
 106-Bruce4\_GSM258869.CEL  
 107-MIMCD3\_GSM258723.CEL  
 108-MIMCD3\_GSM258723.CEL  
 109-mim6\_GSM258725.CEL  
 110-mim6\_GSM258725.CEL  
 111-Astrocytes\_GSM241898.CEL  
 112-Astrocytes\_GSM241898.CEL  
 113-Spleen\_GSM258767.CEL  
 114-Spleen\_GSM258767.CEL  
 115-Spleen\_GSM258767.CEL  
 116-Lymph-nodes\_GSM258691.CEL  
 117-Lymph-nodes\_GSM258691.CEL  
 118-Intestine-small\_GSM258677.CEL  
 119-Intestine-small\_GSM258677.CEL  
 120-Intestine-large\_GSM258677.CEL  
 121-Intestine-large\_GSM258677.CEL  
 122-Colon-d4\_GSM198101.CEL  
 123-Colon-d4\_GSM198101.CEL  
 124-Colon-d9\_GSM198103.CEL  
 125-Colon-d9\_GSM198103.CEL  
 126-Colon-d9\_GSM198104.CEL  
 127-NALT\_GSM289408.CEL  
 128-NALT\_GSM289409.CEL  
 129-NALT\_GSM289410.CEL  
 130-NALT\_GSM289411.CEL



Cluster0270\_High in spleen (8 nodes)

2,086.5  
1,978.7  
1,868.9  
1,757  
1,647.2  
1,537.4  
1,427.6  
1,317.8  
1,208  
1,098.1  
988.3  
878.5  
768.7  
658.9  
549.1  
439.3  
329.4  
219.6  
109.8  
0

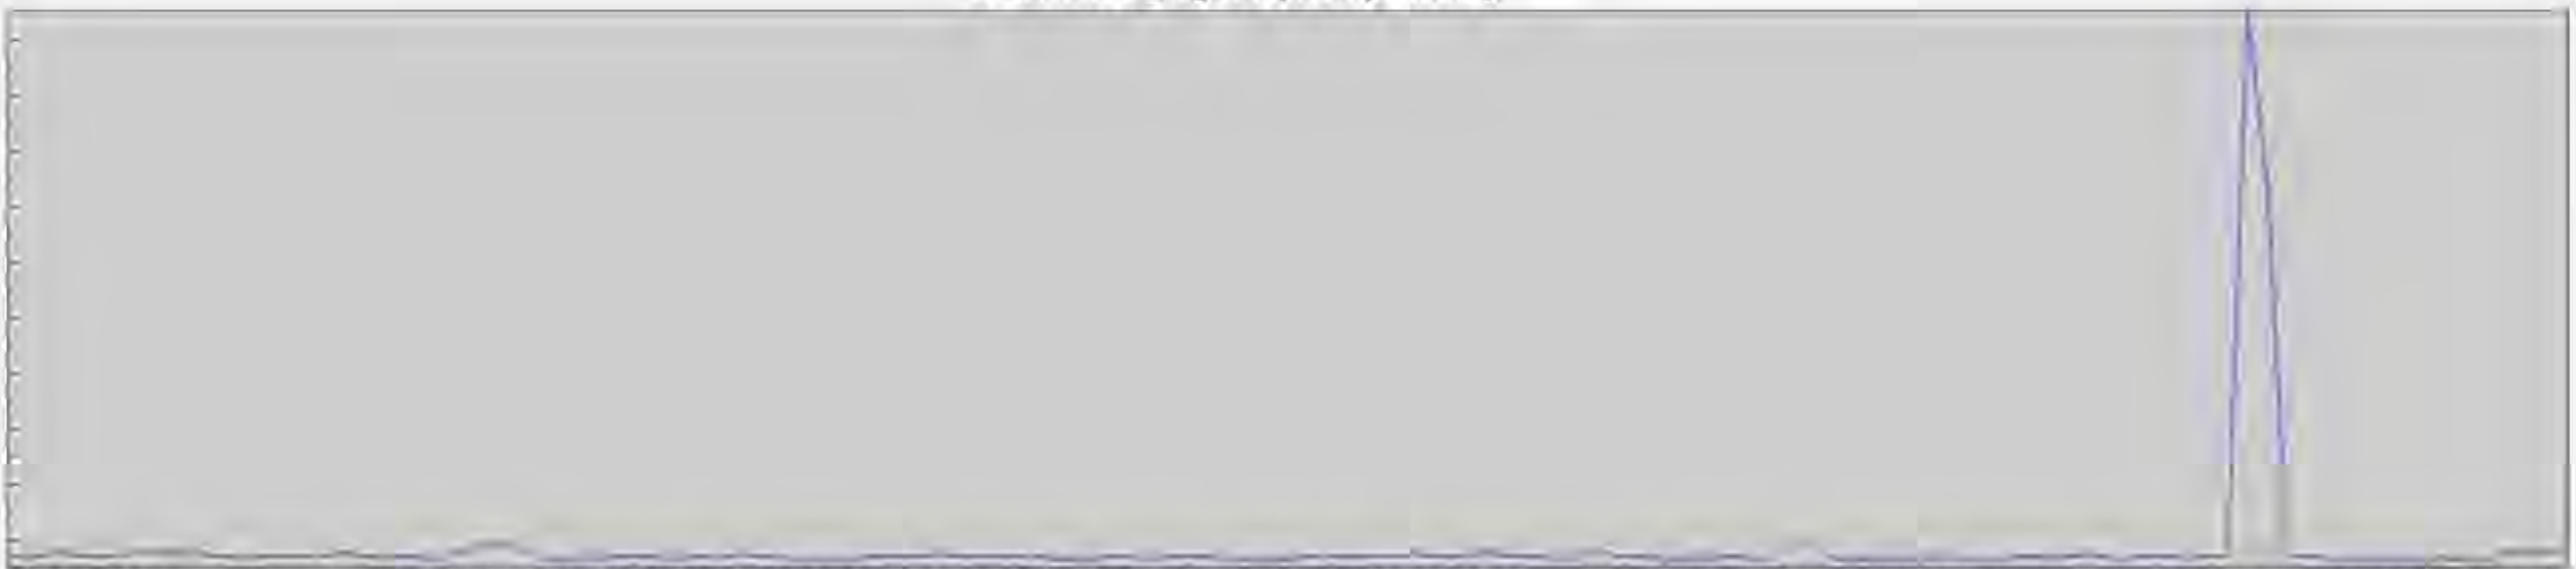

|     |                   |              |     |
|-----|-------------------|--------------|-----|
| 30  | NALT              | GSM289411    | CEL |
| 139 | NALT              | GSM289410    | CEL |
| 138 | NALT              | GSM289409    | CEL |
| 137 | NALT              | GSM289408    | CEL |
| 136 | Colon-d9          | GSM1988104   | CEL |
| 135 | Colon-d9          | GSM1988103   | CEL |
| 134 | Colon-d4          | GSM1988102   | CEL |
| 133 | Colon-d4          | GSM1988101   | CEL |
| 132 | Colon-d4          | GSM1988100   | CEL |
| 131 | Intestine-large   | GSM258676    | CEL |
| 130 | Intestine-large   | GSM258675    | CEL |
| 129 | Intestine-small   | GSM258674    | CEL |
| 118 | Intestine-small   | GSM258673    | CEL |
| 117 | Lymph-nodes       | GSM258672    | CEL |
| 116 | Spleen            | GSM258671    | CEL |
| 115 | Spleen            | GSM258670    | CEL |
| 114 | Spleen            | GSM258669    | CEL |
| 113 | Neuro2a           | GSM241898    | CEL |
| 112 | Neuro2a           | GSM241897    | CEL |
| 111 | Astrocytes        | GSM241896    | CEL |
| 110 | mim6              | GSM258668    | CEL |
| 109 | mim6              | GSM258667    | CEL |
| 108 | MIMCD3            | GSM258666    | CEL |
| 107 | MIMCD3            | GSM258665    | CEL |
| 106 | Bruce4            | GSM258664    | CEL |
| 105 | Bruce4            | GSM258663    | CEL |
| 104 | C2C12             | GSM258662    | CEL |
| 103 | C2C12             | GSM258661    | CEL |
| 102 | NH3T3             | GSM258660    | CEL |
| 101 | NH3T3             | GSM258659    | CEL |
| 100 | 3T3-L1            | GSM258658    | CEL |
| 99  | 3T3-L1            | GSM258657    | CEL |
| 98  | 10T12             | GSM258656    | CEL |
| 97  | 10T12             | GSM258655    | CEL |
| 96  | Osteoblast-d21    | GSM258654    | CEL |
| 95  | Osteoblast-d14    | GSM258653    | CEL |
| 94  | Osteoblast-d14    | GSM258652    | CEL |
| 93  | Osteoblast-d14    | GSM258651    | CEL |
| 92  | Osteoblast-d5     | GSM258650    | CEL |
| 91  | Osteoblast-d5     | GSM258649    | CEL |
| 90  | Chondrocytes      | GSM258648    | CEL |
| 89  | Chondrocytes      | GSM258647    | CEL |
| 88  | Nat Helper cell   | GSM465594    | CEL |
| 87  | Nat Helper cell   | GSM465593    | CEL |
| 86  | T cell            | GSM465592    | CEL |
| 85  | MS-1              | GSM234692    | CEL |
| 84  | Lymph-endc-cells  | GSM143704    | CEL |
| 83  | PP-FDC            | GSM481977    | CEL |
| 82  | PP-FDC            | GSM481976    | CEL |
| 81  | PP-FDC            | GSM481975    | CEL |
| 80  | E-L               | RMLNDC003001 | CEL |
| 79  | E-L               | RMLNDC003001 | CEL |
| 78  | Follicular-Bcells | GSM258664    | CEL |
| 77  | Follicular-Bcells | GSM258663    | CEL |
| 76  | MZ-Bcell          | GSM258662    | CEL |
| 75  | MZ-Bcell          | GSM258661    | CEL |
| 74  | BAF3              | GSM258660    | CEL |
| 73  | BAF3              | GSM258659    | CEL |
| 72  | Tregs             | GSM258658    | CEL |
| 71  | T-cells-CD8+      | GSM258657    | CEL |
| 70  | T-cells-CD8+      | GSM258656    | CEL |
| 69  | T-cells-CD4+      | GSM258655    | CEL |
| 68  | T-cells-CD4+      | GSM258654    | CEL |
| 67  | T-cells-CD4+      | GSM258653    | CEL |
| 66  | Thymocyte-DN      | GSM465595    | CEL |
| 65  | Osteoclasts       | GSM258674    | CEL |
| 64  | Microglia         | GSM258673    | CEL |
| 63  | Microglia         | GSM258672    | CEL |
| 62  | Microglia         | GSM258671    | CEL |
| 61  | PS-7h             | GSM258670    | CEL |
| 60  | PS-7h             | GSM258669    | CEL |
| 59  | PS-6h             | GSM258668    | CEL |
| 58  | PS-6h             | GSM258667    | CEL |
| 57  | PS-6h             | GSM258666    | CEL |
| 56  | PS-6h             | GSM258665    | CEL |
| 55  | PS-6h             | GSM258664    | CEL |
| 54  | PS-6h             | GSM258663    | CEL |
| 53  | PS-6h             | GSM258662    | CEL |
| 52  | PS-6h             | GSM258661    | CEL |
| 51  | PS-6h             | GSM258660    | CEL |
| 50  | PS-6h             | GSM258659    | CEL |
| 49  | PS-6h             | GSM258658    | CEL |
| 48  | PS-6h             | GSM258657    | CEL |
| 47  | PS-6h             | GSM258656    | CEL |
| 46  | PS-6h             | GSM258655    | CEL |
| 45  | PS-6h             | GSM258654    | CEL |
| 44  | PS-6h             | GSM258653    | CEL |
| 43  | PS-6h             | GSM258652    | CEL |
| 42  | PS-6h             | GSM258651    | CEL |
| 41  | PS-6h             | GSM258650    | CEL |
| 40  | PS-6h             | GSM258649    | CEL |
| 39  | PS-6h             | GSM258648    | CEL |
| 38  | PS-6h             | GSM258647    | CEL |
| 37  | PS-6h             | GSM258646    | CEL |
| 36  | PS-6h             | GSM258645    | CEL |
| 35  | PS-6h             | GSM258644    | CEL |
| 34  | PS-6h             | GSM258643    | CEL |
| 33  | PS-6h             | GSM258642    | CEL |
| 32  | PS-6h             | GSM258641    | CEL |
| 31  | PS-6h             | GSM258640    | CEL |
| 30  | PS-6h             | GSM258639    | CEL |
| 29  | PS-6h             | GSM258638    | CEL |
| 28  | PS-6h             | GSM258637    | CEL |
| 27  | PS-6h             | GSM258636    | CEL |
| 26  | PS-6h             | GSM258635    | CEL |
| 25  | PS-6h             | GSM258634    | CEL |
| 24  | PS-6h             | GSM258633    | CEL |
| 23  | PS-6h             | GSM258632    | CEL |
| 22  | PS-6h             | GSM258631    | CEL |
| 21  | PS-6h             | GSM258630    | CEL |
| 20  | PS-6h             | GSM258629    | CEL |
| 19  | PS-6h             | GSM258628    | CEL |
| 18  | PS-6h             | GSM258627    | CEL |
| 17  | PS-6h             | GSM258626    | CEL |
| 16  | PS-6h             | GSM258625    | CEL |
| 15  | PS-6h             | GSM258624    | CEL |
| 14  | PS-6h             | GSM258623    | CEL |
| 13  | PS-6h             | GSM258622    | CEL |
| 12  | PS-6h             | GSM258621    | CEL |
| 11  | PS-6h             | GSM258620    | CEL |
| 10  | PS-6h             | GSM258619    | CEL |
| 9   | PS-6h             | GSM258618    | CEL |
| 8   | PS-6h             | GSM258617    | CEL |
| 7   | PS-6h             | GSM258616    | CEL |
| 6   | PS-6h             | GSM258615    | CEL |
| 5   | PS-6h             | GSM258614    | CEL |
| 4   | PS-6h             | GSM258613    | CEL |
| 3   | PS-6h             | GSM258612    | CEL |
| 2   | PS-6h             | GSM258611    | CEL |
| 1   | PS-6h             | GSM258610    | CEL |



## Cluster0271\_Uncertain (8 nodes)

184.1  
174.4  
164.7  
155  
145.4  
135.7  
126  
116.3  
106.6  
96.9  
87.2  
77.5  
67.8  
58.1  
48.5  
38.8  
29.1  
19.4  
9.7  
0

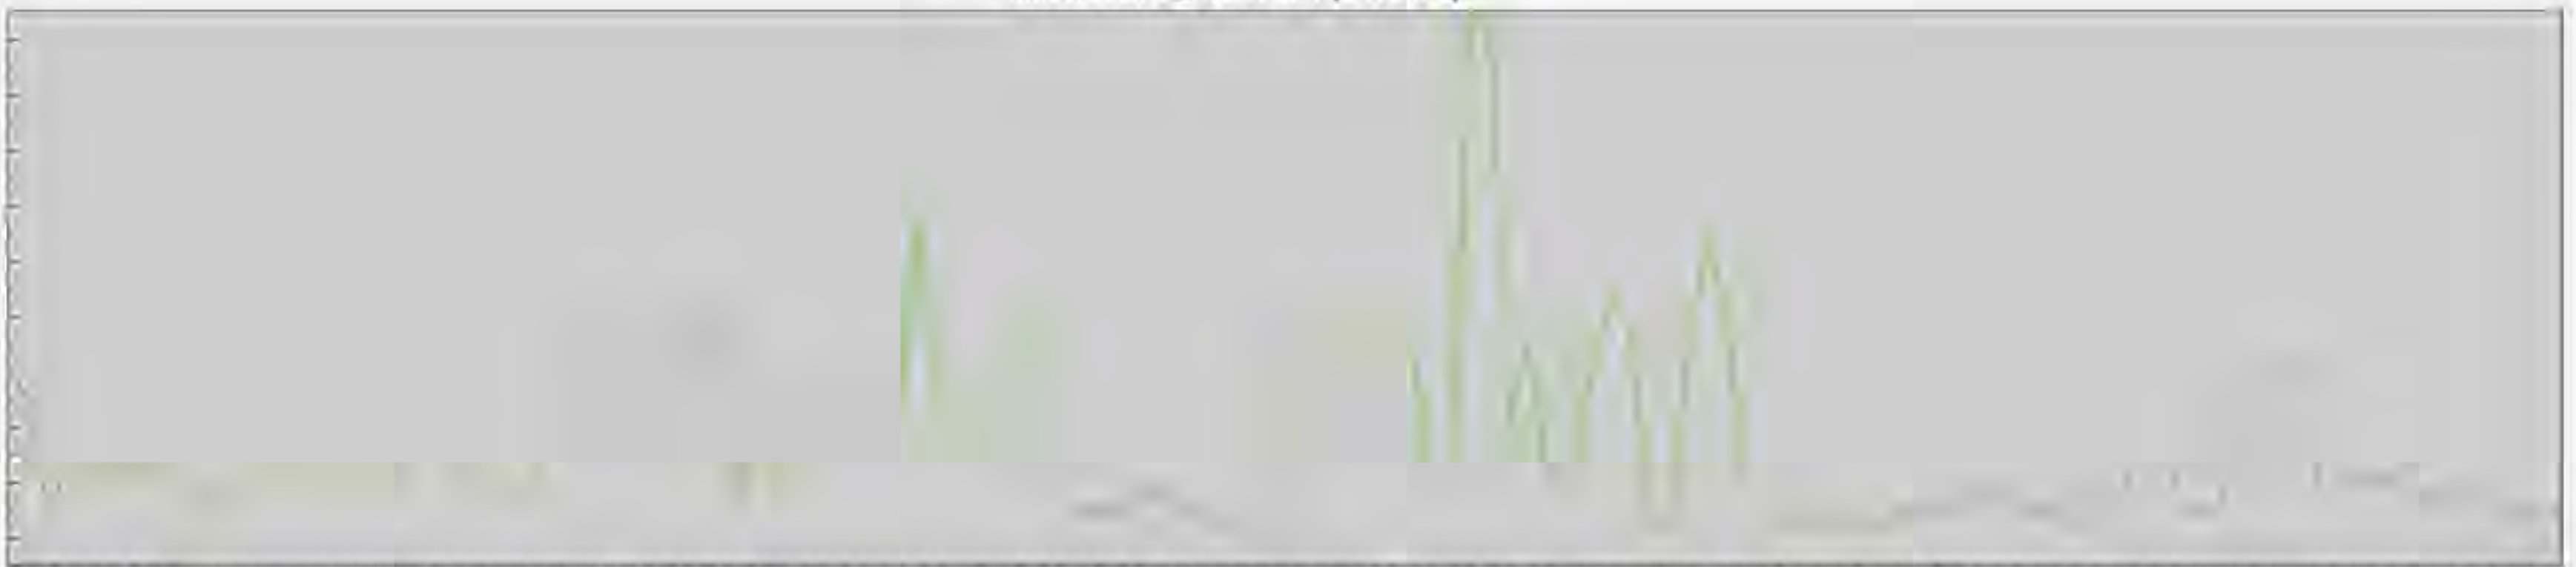

130-NALT GSM289411.CEL  
129-NALT GSM289410.CEL  
128-NALT GSM289409.CEL  
127-NALT GSM289408.CEL  
126-Colon-d9 GSM1988105.CEL  
125-Colon-d9 GSM1988104.CEL  
124-Colon-d9 GSM1988103.CEL  
123-Colon-d4 GSM1988102.CEL  
122-Colon-d4 GSM1988101.CEL  
121-Intestine-large GSM258676.CEL  
120-Intestine-large GSM258675.CEL  
119-Intestine-small GSM258678.CEL  
118-Intestine-small GSM258692.CEL  
117-Lymph-nodes GSM258691.CEL  
116-Lymph-nodes GSM258726.CEL  
115-Spleen GSM258768.CEL  
114-Spleen GSM258767.CEL  
113-Neuro2a GSM258728.CEL  
112-Neuro2a GSM258727.CEL  
111-Astrocytes GSM241898.CEL  
110-mim6 GSM258725.CEL  
109-mim6 GSM258724.CEL  
108-MIMCD3 GSM258723.CEL  
107-MIMCD3 GSM258656.CEL  
106-Bruce4 GSM258655.CEL  
105-Bruce4 GSM258654.CEL  
104-C2C12 GSM258690.CEL  
103-C2C12 GSM258629.CEL  
102-NH3T3 GSM258730.CEL  
101-NH3T3 GSM258729.CEL  
100-3T3-L1 GSM258610.CEL  
99-3T3-L1 GSM258609.CEL  
98-10T12 GSM258632.CEL  
97-10T12 GSM258631.CEL  
96-Osteoblast-d21 GSM258740.CEL  
95-Osteoblast-d21 GSM258739.CEL  
94-Osteoblast-d14 GSM258738.CEL  
93-Osteoblast-d14 GSM258737.CEL  
92-Osteoblast-d5 GSM258742.CEL  
91-Osteoblast-d5 GSM258741.CEL  
90-Chondrocytes GSM266741.CEL  
89-Chondrocytes GSM266740.CEL  
88-Nat Helper cell GSM465594.CEL  
87-Nat Helper cell GSM465593.CEL  
86-LT cell GSM465596.CEL  
85-MS-1 GSM234692.CEL  
84-Lymph-endo-cells GSM143704.CEL  
83-PP-FDC GSM481977.CEL  
82-PP-FDC GSM481978.CEL  
81-PP-FDC GSM481976.CEL  
80-D-LY RMLNDCC003001.CEL  
79-E-LY RMLNDCC003001.CEL  
78-Follicular-Bcells GSM258664.CEL  
77-Follicular-Bcells GSM258663.CEL  
76-MZ-Bcell GSM258627.CEL  
75-MZ-Bcell GSM258621.CEL  
74-BAF3 GSM258620.CEL  
73-BAF3 GSM258619.CEL  
72-Tregs GSM258778.CEL  
71-Tregs GSM258777.CEL  
70-T-cells-CD8+ GSM258776.CEL  
69-T-cells-CD8+ GSM258774.CEL  
68-T-cells-CD4+ GSM258773.CEL  
67-T-cells-CD4+ GSM258773.CEL  
66-Thymocyte-DN GSM465595.CEL  
65-Osteoclasts GSM258743.CEL  
64-Osteoclasts GSM258743.CEL  
63-Microglia GSM258721.CEL  
62-Microglia GSM258721.CEL  
61-PM-M-PS-7h GSM258706.CEL  
60-PM-M-PS-7h GSM258705.CEL  
59-PM-M-PS-7h GSM258702.CEL  
58-PM-M-PS-6h GSM258701.CEL  
57-PM-M-PS-6h GSM258699.CEL  
56-PM-M-PS-6h GSM258699.CEL  
55-PM-M-PS-6h GSM258699.CEL  
54-PM-M-PS-6h GSM258699.CEL  
53-PM-M-PS-6h GSM258699.CEL  
52-PM-M-PS-6h GSM258699.CEL  
51-PM-M-PS-6h GSM258699.CEL  
50-CD8a-DC GSM258647.CEL  
49-CD8a-DC GSM258646.CEL  
48-CD8a+DC GSM258646.CEL  
47-NK-cells GSM258732.CEL  
46-NK-cells GSM258731.CEL  
45-Mast-cells-IgE+Ad GSM258718.CEL  
44-Mast-cells-IgE+Ad GSM258717.CEL  
43-Mast-cells-IgE GSM258714.CEL  
42-Mast-cells-IgE GSM258713.CEL  
41-Mast-cells GSM258712.CEL  
40-Granulocytes GSM258668.CEL  
39-Granulocytes GSM258667.CEL  
38-GMP GSM258666.CEL  
37-GMP GSM258665.CEL  
36-GMP GSM258664.CEL  
35-GMP GSM258642.CEL  
34-GMP GSM258641.CEL  
33-MEP GSM258720.CEL  
32-MEP GSM258719.CEL  
31-HESC GSM258770.CEL  
30-HESC GSM258770.CEL  
29-Bone marrow GSM258628.CEL  
28-Bone marrow GSM258627.CEL  
27-paneth-cells-GE GSM116357.CEL  
26-paneth-cells-GE GSM116350.CEL  
25-paneth-cells GSM116350.CEL  
24-paneth-cells GSM116359.CEL  
23-paneth-cells GSM318589.CEL  
22-paneth-cells GSM318590.CEL  
21-Colon-Crypt GSM480375.CEL  
20-Colon-Crypt GSM480374.CEL  
19-Colon-Vill GSM480363.CEL  
18-Colon-Vill GSM480362.CEL  
17-Colon-IEC-GE GSM349880.CEL  
16-Colon-IEC-GE GSM350375.CEL  
15-Ileum-IEC-TGF GSM350376.CEL  
14-Ileum-IEC GSM350371.CEL  
13-Small-intestine-epithelium RMINEP002001.CEL  
12-Small-intestine-epithelium RMINEP001001.CEL  
11-FAE-RMPYEP002001.CEL  
10-FAE-RMPYEP001001.CEL  
09-Ileum-IEC GSM190797.CEL  
08-Ileum-IEC GSM190796.CEL  
07-Ileum-IEC GSM190795.CEL  
06-CT-v-M-cells GSM190794.CEL  
05-CT-v-M-cells GSM190793.CEL  
04-PP-M-cells GSM190792.CEL  
03-PP-M-cells GSM190791.CEL  
02-PP-M-cells GSM190790.CEL  
01-PP-M-cells GSM190789.CEL



Cluster0272\_High in mast cells and phagocytes (8 nodes)

4,831.1  
4,576.8  
4,322.5  
4,068.3  
3,814  
3,559.7  
3,305.5  
3,051.2  
2,796.9  
2,542.7  
2,288.4  
2,034.1  
1,779.9  
1,525.6  
1,271.3  
1,017.1  
762.8  
508.5  
254.3  
0

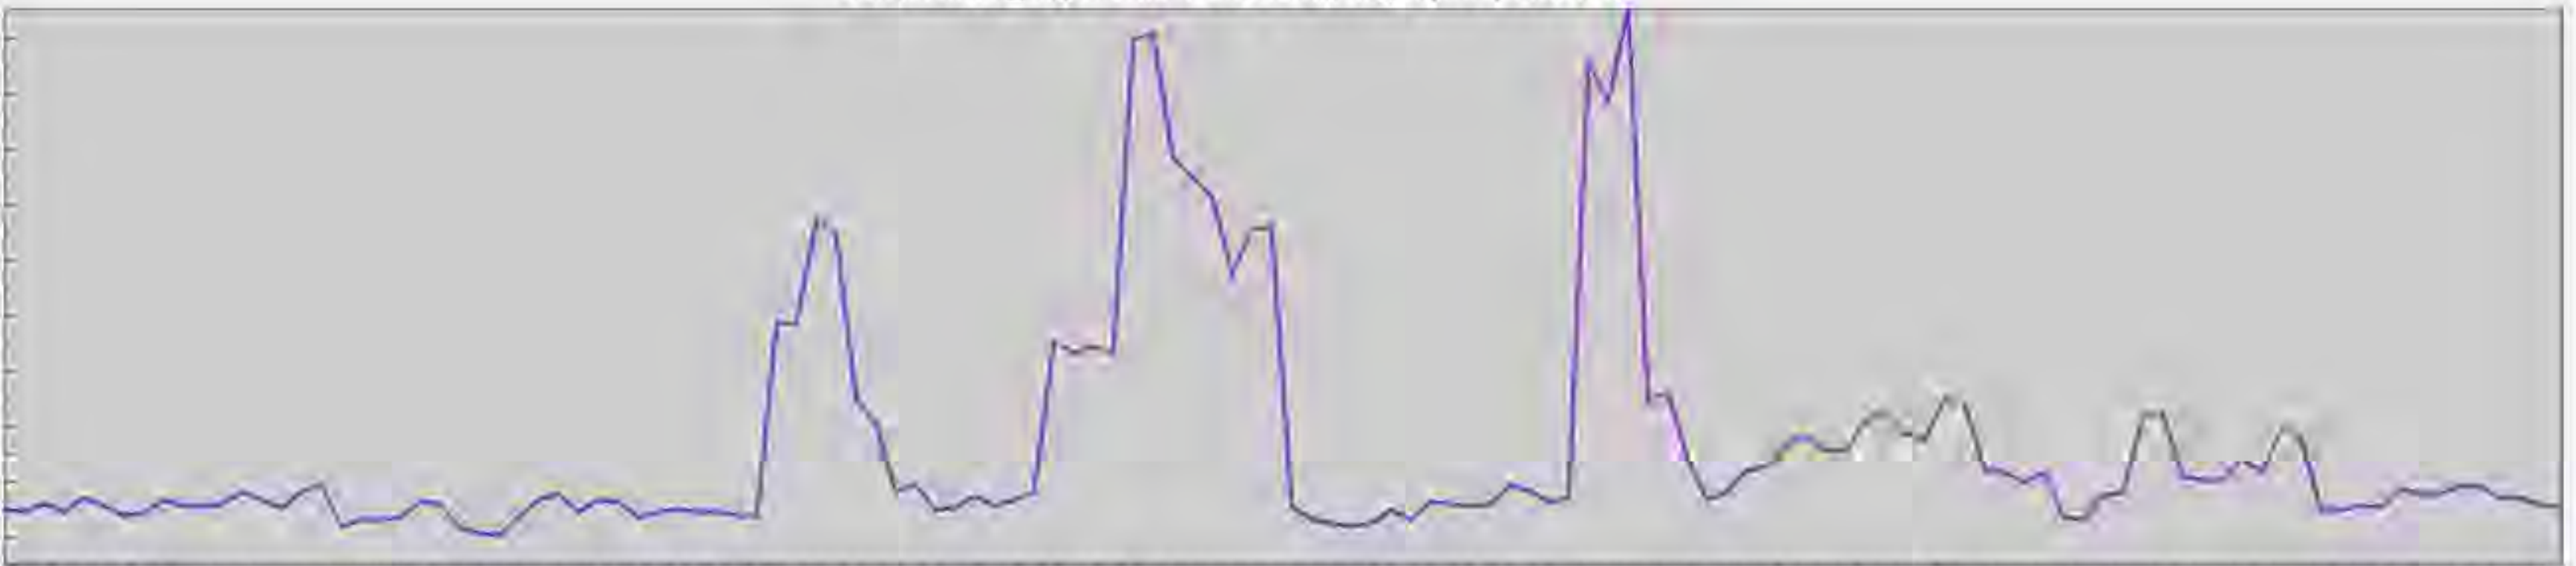

130-NALT GSM289411.CEL  
129-NALT GSM289410.CEL  
128-NALT GSM289409.CEL  
127-NALT GSM289408.CEL  
126-Colon-d9 GSM1988105.CEL  
125-Colon-d9 GSM1988104.CEL  
124-Colon-d9 GSM1988103.CEL  
123-Colon-d4 GSM1988102.CEL  
122-Colon-d4 GSM1988101.CEL  
121-Intestine-large GSM258676.CEL  
120-Intestine-large GSM258675.CEL  
119-Intestine-small GSM258678.CEL  
118-Intestine-small GSM258692.CEL  
117-Lymph-nodes GSM258691.CEL  
116-Lymph-nodes GSM258768.CEL  
115-Spleen GSM258767.CEL  
114-Spleen GSM258766.CEL  
113-Neuro2a GSM258728.CEL  
112-Neuro2a GSM258727.CEL  
111-Astrocytes GSM241898.CEL  
110-ming GSM258726.CEL  
109-ming GSM258725.CEL  
108-MIMCD3 GSM258724.CEL  
107-MIMCD3 GSM258723.CEL  
106-Bruce4 GSM258656.CEL  
105-Bruce4 GSM258655.CEL  
104-C2C12 GSM258690.CEL  
103-C2C12 GSM258629.CEL  
102-NH3T3 GSM258739.CEL  
101-NH3T3 GSM258738.CEL  
100-3T3-L1 GSM258610.CEL  
99-3T3-L1 GSM258609.CEL  
98-10T12 GSM258632.CEL  
97-10T12 GSM258631.CEL  
96-Osteoblast-d21 GSM258740.CEL  
95-Osteoblast-d21 GSM258739.CEL  
94-Osteoblast-d14 GSM258738.CEL  
93-Osteoblast-d14 GSM258737.CEL  
92-Osteoblast-d5 GSM258742.CEL  
91-Osteoblast-d5 GSM258741.CEL  
90-Chondrocytes GSM266741.CEL  
89-Chondrocytes GSM266740.CEL  
88-Nat Helper cell GSM465594.CEL  
87-Nat Helper cell GSM465593.CEL  
86-TT cell GSM465596.CEL  
85-MS-1 GSM234692.CEL  
84-Lymph-endc-cells GSM143704.CEL  
83-PP-FDC GSM481977.CEL  
82-PP-FDC GSM481978.CEL  
81-PP-FDC GSM481976.CEL  
80-D-L Y RMLNDCC002001.CEL  
79-E-L Y RMLNDCC002001.CEL  
78-Follicular-Bcells GSM258664.CEL  
77-Follicular-Bcells GSM258663.CEL  
76-MZ-Bcell GSM258622.CEL  
75-MZ-Bcell GSM258621.CEL  
74-BAF3 GSM258620.CEL  
73-BAF3 GSM258619.CEL  
72-Tregs GSM258778.CEL  
71-Tregs GSM258777.CEL  
70-T-cells-CD8+ GSM258776.CEL  
69-T-cells-CD8+ GSM258775.CEL  
68-T-cells-CD4+ GSM258774.CEL  
67-T-cells-CD4+ GSM258773.CEL  
66-Thymocyte-DN GSM465595.CEL  
65-Osteoclasts GSM258743.CEL  
64-Microglia GSM258727.CEL  
63-Microglia GSM258721.CEL  
62-MM-LPS-7h GSM258706.CEL  
61-MM-LPS-7h GSM258705.CEL  
60-MM-LPS-6h GSM258702.CEL  
59-MM-LPS-6h GSM258701.CEL  
58-BMM-LPS-6h GSM258699.CEL  
57-BMM-LPS-6h GSM258698.CEL  
56-BMM-LPS-6h GSM258694.CEL  
55-BMM-LPS-6h GSM258693.CEL  
54-Iasmacytoid-DC GSM258650.CEL  
53-Iasmacytoid-DC GSM258649.CEL  
52-CD8a-DC GSM258647.CEL  
51-CD8a-DC GSM258647.CEL  
50-CD8a+DC GSM258646.CEL  
49-CD8a+DC GSM258646.CEL  
48-D8a+DC GSM258645.CEL  
47-NK-cells GSM258737.CEL  
46-NK-cells GSM258731.CEL  
45-Mast-cells-IgE+Ad GSM258718.CEL  
44-Mast-cells-IgE+Ad GSM258717.CEL  
43-Mast-cells-IgE GSM258714.CEL  
42-Mast-cells-IgE GSM258713.CEL  
41-Mast-cells GSM258712.CEL  
40-Granulocytes GSM258668.CEL  
39-Granulocytes GSM258667.CEL  
38-GMP GSM258666.CEL  
37-GMP GSM258665.CEL  
36-GMP GSM258664.CEL  
35-CMP GSM258642.CEL  
34-CMP GSM258641.CEL  
33-MEP GSM258720.CEL  
32-MEP GSM258719.CEL  
31-HSC GSM258770.CEL  
30-HSC GSM258769.CEL  
29-Bone marrow GSM258628.CEL  
28-Bone marrow GSM258627.CEL  
27-paneth-cells-GF-1 GSM116357.CEL  
26-paneth-cells-GF-1 GSM116350.CEL  
25-paneth-cells GSM116359.CEL  
24-paneth-cells GSM116359.CEL  
23-paneth-cells GSM318589.CEL  
22-paneth-cells GSM318590.CEL  
21-Colon-Crypt GSM480375.CEL  
20-Colon-Crypt GSM480374.CEL  
19-Colon-Vill GSM480363.CEL  
18-Colon-Vill GSM480362.CEL  
17-Colon-IEC-GF GSM349880.CEL  
16-Colon-IEC-GF GSM350375.CEL  
15-Ileum-IEC-GF GSM350376.CEL  
14-Ileum-IEC GSM350371.CEL  
13-Small-intestine-epithelium\_RMINEP002001.CEL  
12-Small-intestine-epithelium\_RMINEP001001.CEL  
11-FAE-RMPYEP002001.CEL  
10-FAE-RMPYEP001001.CEL  
09-Ileum-IEC GSM190797.CEL  
08-Ileum-IEC GSM190796.CEL  
07-Ileum-IEC GSM190795.CEL  
06-CT-v-M-cells GSM190794.CEL  
05-CT-v-M-cells GSM190793.CEL  
04-CT-v-M-cells GSM190792.CEL  
03-PP-M-cells GSM190791.CEL  
02-PP-M-cells GSM190790.CEL  
01-PP-M-cells GSM190789.CEL



Cluster0273\_Phagocyte-related (8 nodes)

3,129.7  
2,965  
2,800.3  
2,635.6  
2,470.9  
2,306.1  
2,141.4  
1,976.7  
1,812  
1,647.2  
1,482.5  
1,317.8  
1,153.1  
988.3  
823.6  
658.9  
494.2  
329.4  
164.7  
0

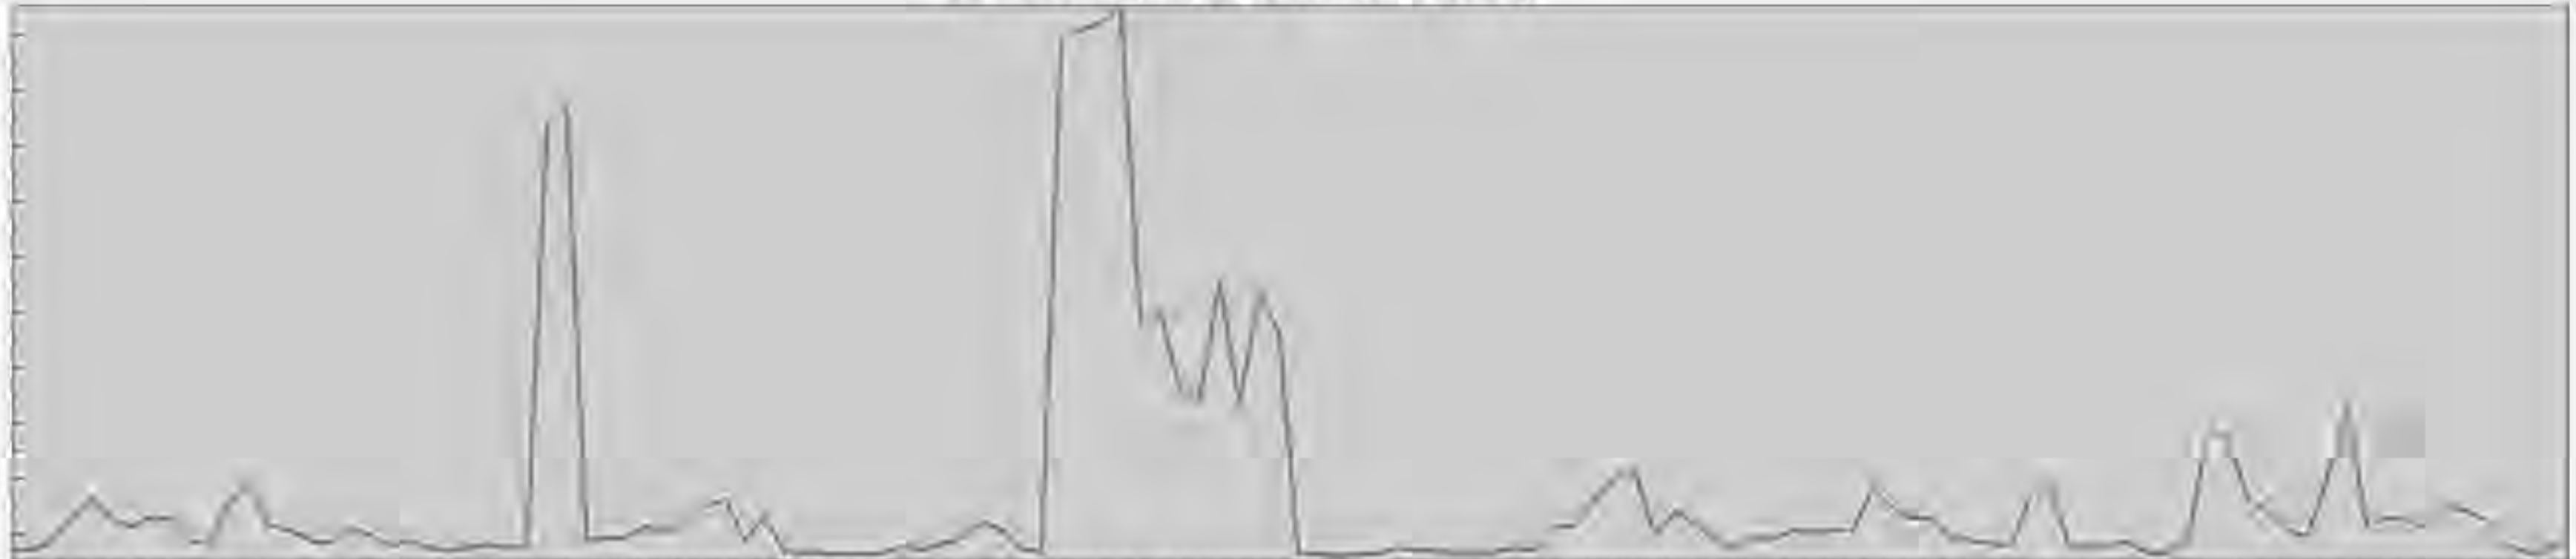



## Cluster0274\_Uncertain (8 nodes)

1,383.7  
1,310.9  
1,238.1  
1,165.2  
1,092.4  
1,019.6  
946.8  
873.9  
801.1  
728.3  
655.5  
582.6  
509.8  
437  
364.1  
291.3  
218.5  
145.7  
72.8  
0

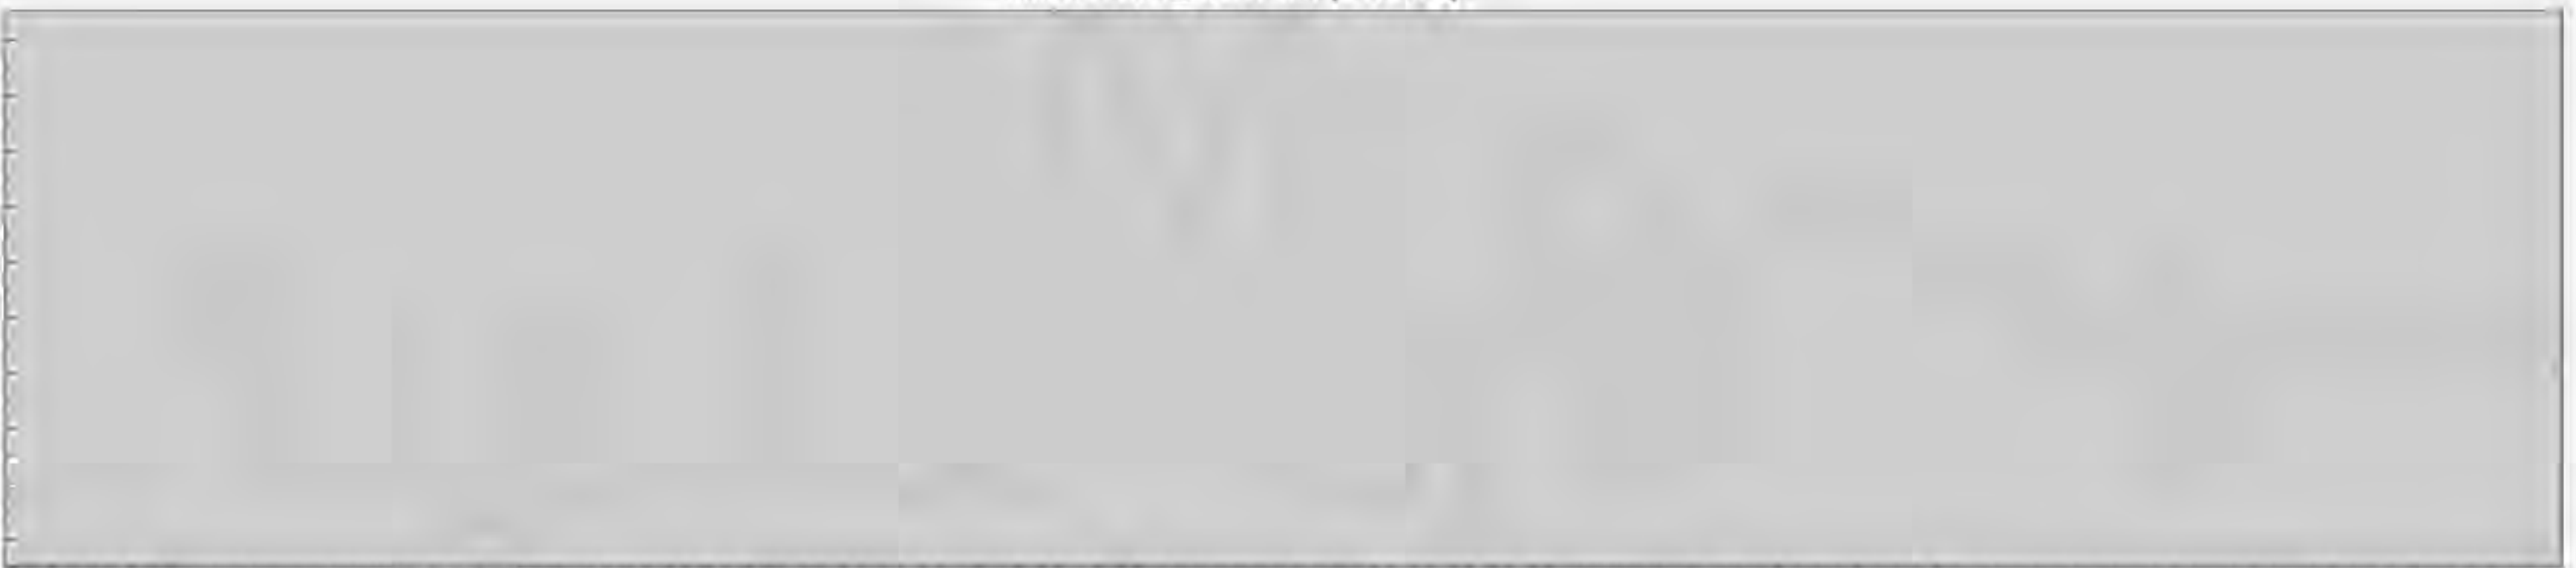

130-NALT GSM289411 CELL  
 129-NALT GSM289410 CELL  
 128-NALT GSM289409 CELL  
 127-NALT GSM289408 CELL  
 126-Color-d9 GSM1988105 CELL  
 125-Color-d9 GSM1988104 CELL  
 124-Color-d9 GSM1988103 CELL  
 123-Color-d4 GSM1988102 CELL  
 122-Color-d4 GSM1988101 CELL  
 121-Intestine-large GSM258676 CELL  
 120-Intestine-large GSM258675 CELL  
 119-Intestine-small GSM258674 CELL  
 118-Intestine-small GSM258673 CELL  
 117-Lymph-nodes GSM258672 CELL  
 116-Lymph-nodes GSM258671 CELL  
 115-Spleen GSM258767 CELL  
 114-Spleen GSM258766 CELL  
 113-Neuro2a GSM258728 CELL  
 112-Neuro2a GSM258727 CELL  
 111-Astrocytes GSM241898 CELL  
 110-mimb GSM258726 CELL  
 109-mimb GSM258725 CELL  
 108-MIMCD3 GSM258724 CELL  
 107-MIMCD3 GSM258723 CELL  
 106-Bruce4 GSM258656 CELL  
 105-Bruce4 GSM258655 CELL  
 104-C2C12 GSM258690 CELL  
 103-C2C12 GSM258689 CELL  
 102-NH3T3 GSM258739 CELL  
 101-NH3T3 GSM258738 CELL  
 100-3T3-L1 GSM258610 CELL  
 99-3T3-L1 GSM258609 CELL  
 98-10T12 GSM258632 CELL  
 97-10T12 GSM258631 CELL  
 96-Osteoblast-d21 GSM258740 CELL  
 95-Osteoblast-d21 GSM258739 CELL  
 94-Osteoblast-d14 GSM258738 CELL  
 93-Osteoblast-d14 GSM258737 CELL  
 92-Osteoblast-d5 GSM258742 CELL  
 91-Osteoblast-d5 GSM258741 CELL  
 90-Chondrocytes GSM266741 CELL  
 89-Chondrocytes GSM266740 CELL  
 88-Nat Helper cell GSM465594 CELL  
 87-Nat Helper cell GSM465593 CELL  
 86-TT cell GSM465596 CELL  
 85-MS-1 GSM234692 CELL  
 84-Lymph-endo-cells GSM143704 CELL  
 83-PP-FDC GSM481977 CELL  
 82-PP-FDC GSM481978 CELL  
 81-PP-FDC GSM481976 CELL  
 80-F-L-Y RMLNDCC003001 CELL  
 79-F-L-Y RMLNDCC003001 CELL  
 78-Follicular-Bcells GSM258664 CELL  
 77-Follicular-Bcells GSM258663 CELL  
 76-MZ-Bcell GSM258627 CELL  
 75-MZ-Bcell GSM258627 CELL  
 74-BAF3 GSM258620 CELL  
 73-BAF3 GSM258619 CELL  
 72-Tregs GSM258778 CELL  
 71-Tregs GSM258777 CELL  
 70-T-cells-CD8+ GSM258776 CELL  
 69-T-cells-CD8+ GSM258774 CELL  
 68-T-cells-CD4+ GSM258773 CELL  
 67-T-cells-CD4+ GSM258773 CELL  
 66-Thymocyte-DN GSM465595 CELL  
 65-Osteoclasts GSM258743 CELL  
 64-Osteoclasts GSM258743 CELL  
 63-Microglia GSM258721 CELL  
 62-Microglia GSM258721 CELL  
 61-PM-M-PS-7h GSM258706 CELL  
 60-PM-M-PS-7h GSM258706 CELL  
 59-PM-M-PS-7h GSM258702 CELL  
 58-PM-M-PS-6h GSM258700 CELL  
 57-PM-M-PS-6h GSM258699 CELL  
 56-PM-M-PS-6h GSM258699 CELL  
 55-PM-M-PS-6h GSM258699 CELL  
 54-PM-M-PS-6h GSM258699 CELL  
 53-PM-M-PS-6h GSM258699 CELL  
 52-PM-M-PS-7h GSM258702 CELL  
 51-PM-M-PS-7h GSM258702 CELL  
 50-CD8a-DC GSM258647 CELL  
 49-CD8a-DC GSM258646 CELL  
 48-CD8a+DC GSM258646 CELL  
 47-NK-cells GSM258732 CELL  
 46-NK-cells GSM258731 CELL  
 45-Mast-cells-IgE+Ad GSM258719 CELL  
 44-Mast-cells-IgE+Ad GSM258717 CELL  
 43-Mast-cells-IgE GSM258714 CELL  
 42-Mast-cells-IgE GSM258713 CELL  
 41-Mast-cells GSM258712 CELL  
 40-Granulocytes GSM258712 CELL  
 39-Granulocytes GSM258667 CELL  
 38-Granulocytes GSM258666 CELL  
 37-GMP GSM258665 CELL  
 36-GMP GSM258665 CELL  
 35-GMP GSM258642 CELL  
 34-GMP GSM258642 CELL  
 33-MEP GSM258720 CELL  
 32-MEP GSM258720 CELL  
 31-MEP GSM258720 CELL  
 30-HESC GSM258770 CELL  
 29-Bone marrow GSM258628 CELL  
 28-Bone marrow GSM258627 CELL  
 27-paneth-cells-GE GSM116358 CELL  
 26-paneth-cells-GE GSM116357 CELL  
 25-paneth-cells GSM116350 CELL  
 24-paneth-cells GSM116359 CELL  
 23-paneth-cells GSM318589 CELL  
 22-paneth-cells GSM318590 CELL  
 21-Color-Crypt GSM480375 cel  
 20-Color-Crypt GSM480374 cel  
 19-Color-Vill GSM480363 cel  
 18-Color-Vill GSM480362 cel  
 17-Color-IEC-GE GSM349880 CELL  
 16-Color-IEC-GE GSM350375 CELL  
 15-Ileum-IEC-TGF GSM350376 CELL  
 14-Ileum-IEC GSM350371 CELL  
 13-Small-intestine-epithelium RMINEP002001 CELL  
 12-Small-intestine-epithelium RMINEP001001 CELL  
 11-FAE-RMPYEP002001 CELL  
 10-FAE-RMPYEP001001 CELL  
 09-Ileum-IEC GSM190797 CELL  
 08-Ileum-IEC GSM190796 CELL  
 07-Ileum-IEC GSM190795 CELL  
 06-CT-v-M-cells GSM190794 CELL  
 05-CT-v-M-cells GSM190793 CELL  
 04-PP-M-cells GSM190792 CELL  
 03-PP-M-cells GSM190791 CELL  
 02-PP-M-cells GSM190790 CELL  
 01-PP-M-cells GSM190789 CELL



Cluster0275\_Uncertain (8 nodes)

395.7  
374.8  
354  
333.2  
312.4  
291.5  
270.7  
249.9  
229.1  
208.2  
187.4  
166.6  
145.8  
124.9  
104.1  
83.8  
62.5  
41.6  
20.8  
0

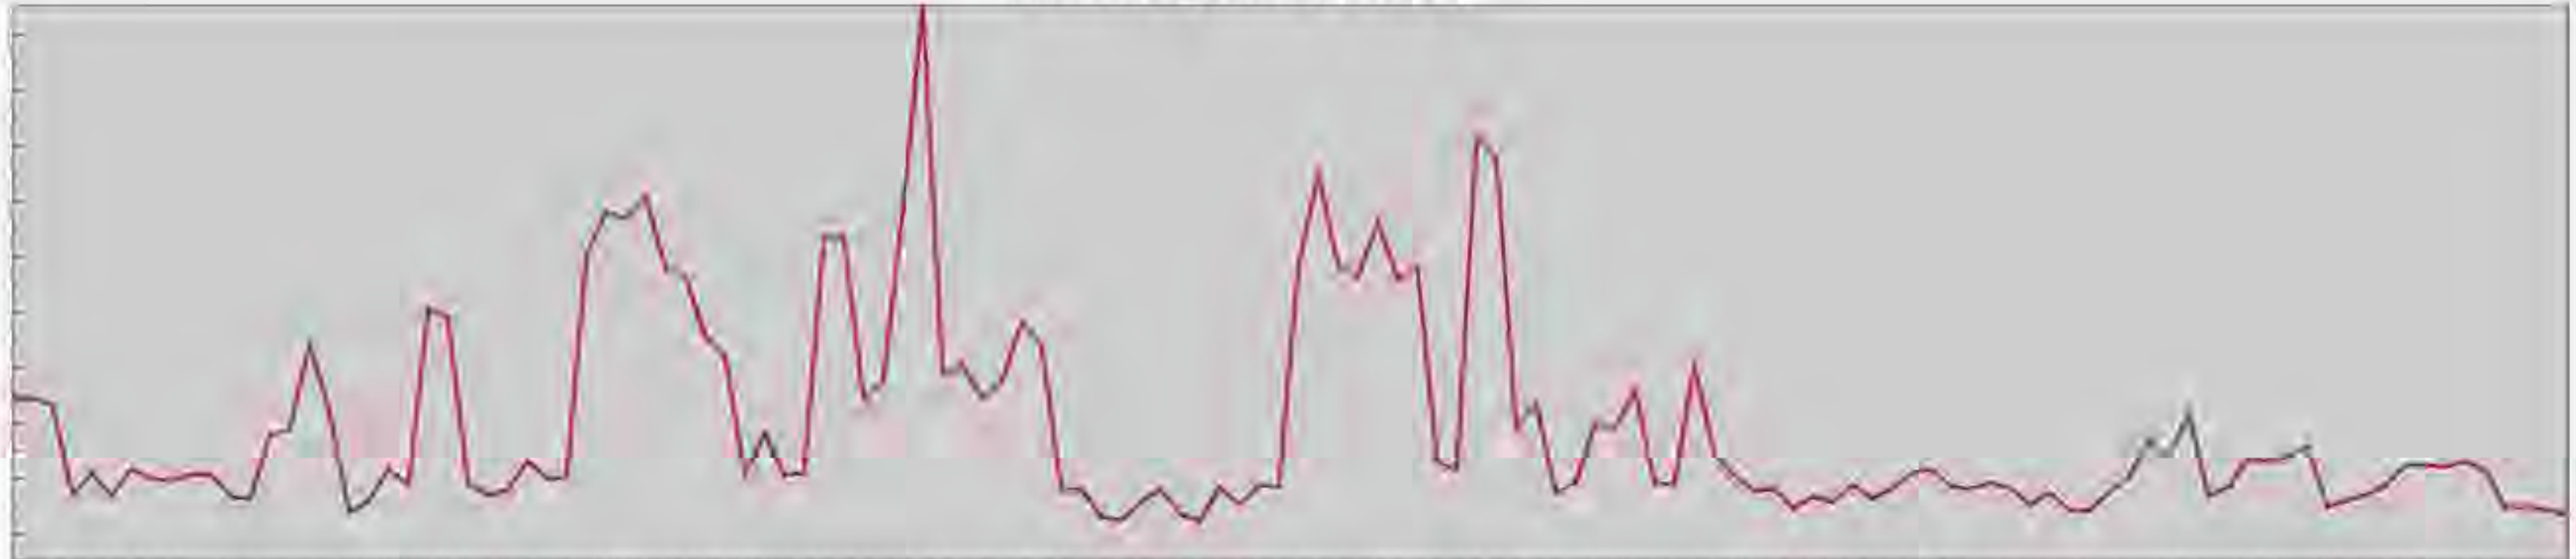

01-PP-M-cells\_GSM190789.CEL  
02-PP-M-cells\_GSM190790.CEL  
03-PP-M-cells\_GSM190791.CEL  
04-CT-v-M-cells\_GSM190792.CEL  
05-CT-v-M-cells\_GSM190793.CEL  
06-CT-v-M-cells\_GSM190794.CEL  
07-Ileum-IEC\_GSM190795.CEL  
08-Ileum-IEC\_GSM190796.CEL  
09-Ileum-IEC\_GSM190797.CEL  
10-FAE-RMPYEP001001.CEL  
11-FAE-RMPYEP002001.CEL  
12-Small-intestine-epithelium\_RMINEP001001.CEL  
13-Small-intestine-epithelium\_RMINEP002001.CEL  
14-Ileum-IEC\_GSM350371.CEL  
15-Ileum-IEC\_GSM350375.CEL  
16-Colon-IEC-Gf\_GSM349880.CEL  
17-Colon-VIII\_GSM480362.CEL  
18-Colon-VIII\_GSM480363.CEL  
19-Colon-VIII\_GSM480364.CEL  
20-Colon-Crypt\_GSM480374.CEL  
21-Colon-Crypt\_GSM480375.CEL  
22-Paneth-cells\_GSM318589.CEL  
23-Paneth-cells\_GSM318590.CEL  
24-Paneth-cells\_GSM116359.CEL  
25-Paneth-cells\_GSM116359.CEL  
26-Paneth-cells-Gf-1\_GSM116357.CEL  
27-Paneth-cells-Gf-1\_GSM116357.CEL  
28-Bone marrow\_GSM258627.CEL  
29-Bone marrow\_GSM258627.CEL  
30-HSC\_GSM258770.CEL  
31-HSC\_GSM258770.CEL  
32-MEP\_GSM258771.CEL  
33-MEP\_GSM258771.CEL  
34-MEP\_GSM258771.CEL  
35-GMP\_GSM258664.CEL  
36-GMP\_GSM258664.CEL  
37-GMP\_GSM258664.CEL  
38-Granulocytes\_GSM258667.CEL  
39-Granulocytes\_GSM258667.CEL  
40-Mast-cells\_GSM258712.CEL  
41-Mast-cells\_GSM258712.CEL  
42-Mast-cells-Gf\_GSM258713.CEL  
43-Mast-cells-Gf+Ad\_GSM258714.CEL  
44-Mast-cells-Gf+Ad\_GSM258714.CEL  
45-Mast-cells-Gf+Ad\_GSM258718.CEL  
46-NK-cells\_GSM258732.CEL  
47-NK-cells\_GSM258732.CEL  
48-CD8a+DC\_GSM258646.CEL  
49-CD8a+DC\_GSM258646.CEL  
50-CD8a-DC\_GSM258647.CEL  
51-CD8a-DC\_GSM258647.CEL  
52-Plasmacytoid-DC\_GSM258650.CEL  
53-Plasmacytoid-DC\_GSM258649.CEL  
54-BMM-GSM258694.CEL  
55-BMM-GSM258694.CEL  
56-BMM-LPS-6h\_GSM258700.CEL  
57-BMM-LPS-6h\_GSM258700.CEL  
58-BMM-LPS-7h\_GSM258702.CEL  
59-BMM-LPS-7h\_GSM258702.CEL  
60-PP-7h\_GSM258706.CEL  
61-PP-7h\_GSM258706.CEL  
62-Microglia\_GSM258721.CEL  
63-Microglia\_GSM258721.CEL  
64-Osteoclasts\_GSM258743.CEL  
65-Osteoclasts\_GSM258744.CEL  
66-Thymocyte-DN\_GSM465595.CEL  
67-T-cells-CD4+\_GSM258773.CEL  
68-T-cells-CD4+\_GSM258773.CEL  
69-T-cells-CD8+\_GSM258774.CEL  
70-T-cells-CD8+\_GSM258774.CEL  
71-Tregs\_GSM258778.CEL  
72-Tregs\_GSM258778.CEL  
73-BAF3\_GSM258620.CEL  
74-BAF3\_GSM258620.CEL  
75-MZ-Bcell\_GSM258621.CEL  
76-MZ-Bcell\_GSM258621.CEL  
77-Follicular-Bcells\_GSM258653.CEL  
78-Follicular-Bcells\_GSM258653.CEL  
79-FLY-RMLNDC002001.CEL  
80-FLY-RMLNDC003001.CEL  
81-PP-FDC\_GSM481976.CEL  
82-PP-FDC\_GSM481976.CEL  
83-PP-FDC\_GSM481977.CEL  
84-Lymph-endg-cells\_GSM143704.CEL  
85-MS-1\_GSM234692.CEL  
86-LT cell\_GSM465596.CEL  
87-Nat Helper cell\_GSM465593.CEL  
88-Nat Helper cell\_GSM465594.CEL  
89-Chondrocytes\_GSM266741.CEL  
90-Chondrocytes\_GSM266741.CEL  
91-Osteoblast-d5\_GSM258741.CEL  
92-Osteoblast-d5\_GSM258742.CEL  
93-Osteoblast-d14\_GSM258737.CEL  
94-Osteoblast-d21\_GSM258738.CEL  
95-Osteoblast-d21\_GSM258739.CEL  
96-Osteoblast-d21\_GSM258739.CEL  
97-10T12\_GSM258631.CEL  
98-10T12\_GSM258631.CEL  
99-3T3-L1\_GSM258609.CEL  
100-3T3-L1\_GSM258610.CEL  
101-NH3T3\_GSM258739.CEL  
102-NH3T3\_GSM258739.CEL  
103-C2C12\_GSM258629.CEL  
104-Bruce4\_GSM258690.CEL  
105-Bruce4\_GSM258690.CEL  
106-Bruce4\_GSM258690.CEL  
107-MIMCD3\_GSM258723.CEL  
108-MIMCD3\_GSM258723.CEL  
109-mim6\_GSM258725.CEL  
110-mim6\_GSM258725.CEL  
111-Astrocytes\_GSM241898.CEL  
112-Astrocytes\_GSM241898.CEL  
113-Spleen\_GSM258767.CEL  
114-Spleen\_GSM258767.CEL  
115-Lymph-nodes\_GSM258691.CEL  
116-Lymph-nodes\_GSM258691.CEL  
117-Lymph-nodes\_GSM258691.CEL  
118-Intestine-small\_GSM258692.CEL  
119-Intestine-small\_GSM258692.CEL  
120-Intestine-large\_GSM258675.CEL  
121-Intestine-large\_GSM258676.CEL  
122-Colon-d4\_GSM198101.CEL  
123-Colon-d4\_GSM198101.CEL  
124-Colon-d9\_GSM198103.CEL  
125-Colon-d9\_GSM198103.CEL  
126-NALT\_GSM289408.CEL  
127-NALT\_GSM289408.CEL  
128-NALT\_GSM289409.CEL  
129-NALT\_GSM289410.CEL  
130-NALT\_GSM289411.CEL



Cluster0276\_intestine-related (7 nodes)

1,666.4  
1,578.7  
1,491  
1,403.3  
1,315.6  
1,227.9  
1,140.2  
1,052.5  
964.7  
877  
789.3  
701.6  
613.9  
526.2  
438.5  
350.8  
263.1  
175.4  
87.7  
0

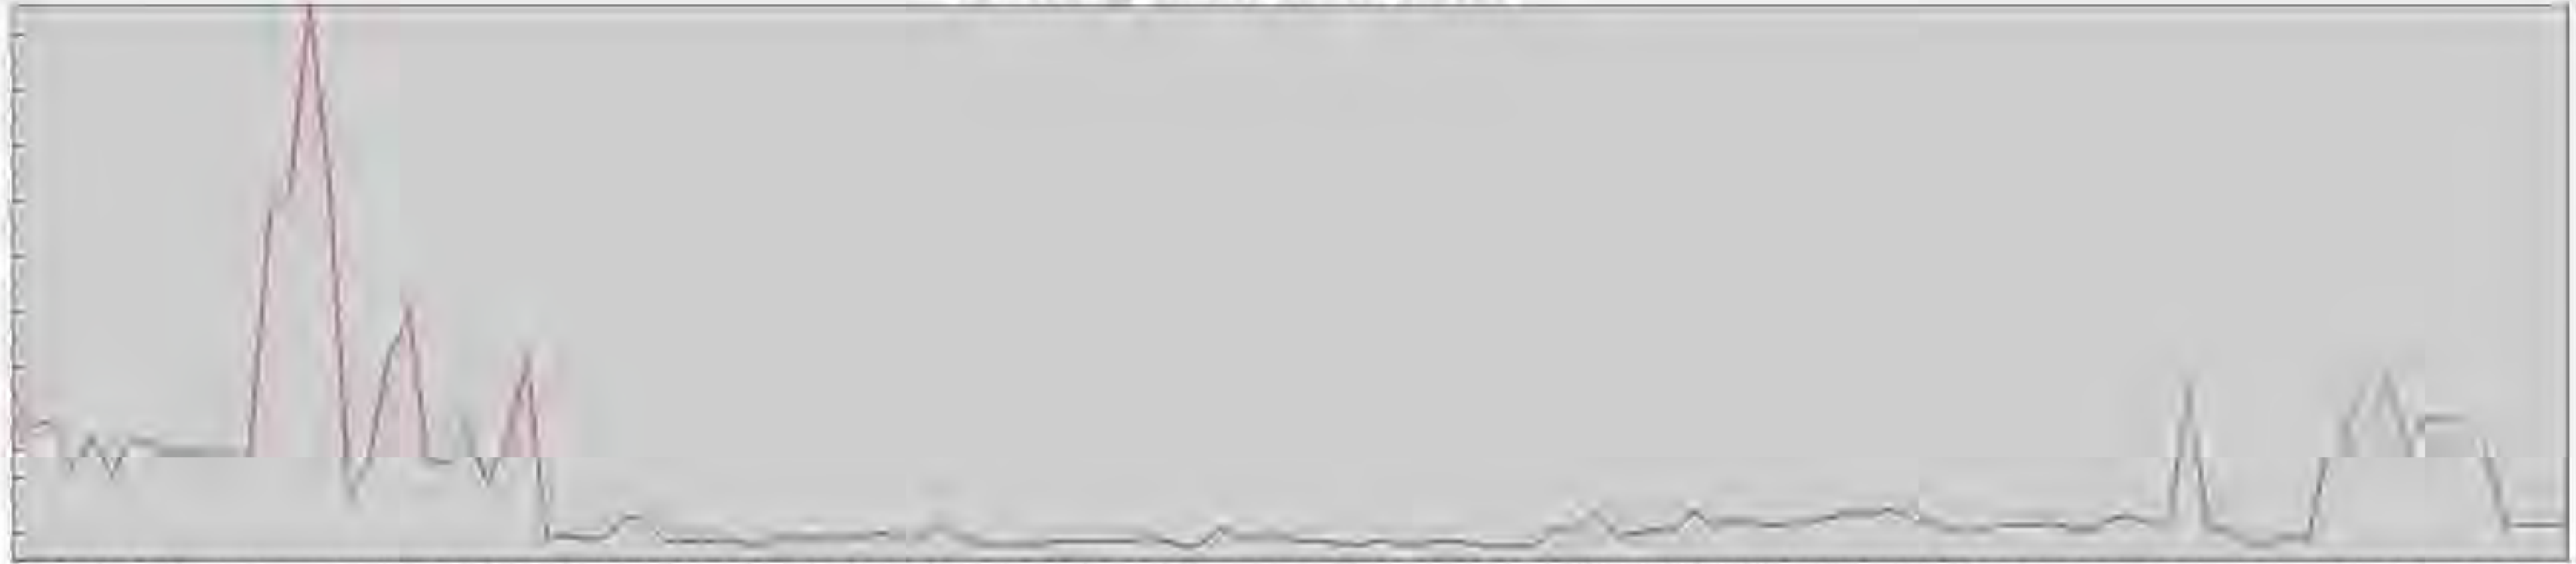

01-PP-M-cells\_GSM190789.CEL  
 02-PP-M-cells\_GSM190790.CEL  
 03-PP-M-cells\_GSM190791.CEL  
 04-CT-v-M-cells\_GSM190792.CEL  
 05-CT-v-M-cells\_GSM190793.CEL  
 06-CT-v-M-cells\_GSM190794.CEL  
 07-Ileum-IEC\_GSM190795.CEL  
 08-Ileum-IEC\_GSM190796.CEL  
 09-Ileum-IEC\_GSM190797.CEL  
 10-FAE-RMPYE001001.CEL  
 11-FAE-RMPYE002001.CEL  
 12-Small-intestine-epithelium\_RMINEP001001.CEL  
 13-Small-intestine-epithelium\_RMINEP002001.CEL  
 14-Ileum-IEC\_GSM350371.CEL  
 15-Ileum-IEC\_GSM350375.CEL  
 16-Colon-IEC-Gf\_GSM349880.CEL  
 17-Colon-IEC-Gf\_GSM349880.CEL  
 18-Colon-Vill-GSM480362.CEL  
 19-Colon-Vill-GSM480363.CEL  
 20-Colon-Crypt\_GSM480374.CEL  
 21-Colon-Crypt\_GSM480375.CEL  
 22-Paneth-cells\_GSM318590.CEL  
 23-Paneth-cells\_GSM318590.CEL  
 24-Paneth-cells\_GSM116359.CEL  
 25-Paneth-cells\_GSM116359.CEL  
 26-Paneth-cells-Gf-1-GSM116357.CEL  
 27-Paneth-cells-Gf-1-GSM116357.CEL  
 28-Bone marrow\_GSM258627.CEL  
 29-Bone marrow\_GSM258627.CEL  
 30-HSC\_GSM258770.CEL  
 31-HSC\_GSM258770.CEL  
 32-MEP-GSM258770.CEL  
 33-MEP-GSM258770.CEL  
 34-MEP-GSM258770.CEL  
 35-MEP-GSM258770.CEL  
 36-GMP-GSM258666.CEL  
 37-GMP-GSM258666.CEL  
 38-GMP-GSM258666.CEL  
 39-Granulocytes\_GSM258667.CEL  
 40-Granulocytes\_GSM258667.CEL  
 41-Mast-cells\_GSM258712.CEL  
 42-Mast-cells-Gf-GSM258714.CEL  
 43-Mast-cells-Gf-GSM258714.CEL  
 44-Mast-cells-Gf+Ad-GSM258719.CEL  
 45-Mast-cells-Gf+Ad-GSM258719.CEL  
 46-NK-cells\_GSM258732.CEL  
 47-NK-cells\_GSM258732.CEL  
 48-CD8a+DC\_GSM258646.CEL  
 49-CD8a+DC\_GSM258646.CEL  
 50-CD8a-DC\_GSM258647.CEL  
 51-CD8a-DC\_GSM258647.CEL  
 52-Plasmacytoid-DC\_GSM258649.CEL  
 53-Plasmacytoid-DC\_GSM258649.CEL  
 54-BMM-GSM258694.CEL  
 55-BMM-GSM258694.CEL  
 56-BMM-LPS-6h-GSM258700.CEL  
 57-BMM-LPS-6h-GSM258700.CEL  
 58-BMM-LPS-7h-GSM258702.CEL  
 59-BMM-LPS-7h-GSM258702.CEL  
 60-PP-7h-GSM258706.CEL  
 61-PP-7h-GSM258706.CEL  
 62-Microglia\_GSM258721.CEL  
 63-Microglia\_GSM258721.CEL  
 64-Osteoclasts\_GSM258743.CEL  
 65-Osteoclasts\_GSM258743.CEL  
 66-Thymocyte-DN\_GSM465595.CEL  
 67-T-cells-CD4+GSM258773.CEL  
 68-T-cells-CD4+GSM258773.CEL  
 69-T-cells-CD8+GSM258776.CEL  
 70-T-cells-CD8+GSM258776.CEL  
 71-Tregs\_GSM258778.CEL  
 72-Tregs\_GSM258778.CEL  
 73-BAF3\_GSM258620.CEL  
 74-BAF3\_GSM258620.CEL  
 75-MZ-Bcell\_GSM258622.CEL  
 76-MZ-Bcell\_GSM258622.CEL  
 77-Follicular-Bcells\_GSM258664.CEL  
 78-Follicular-Bcells\_GSM258664.CEL  
 79-F-LY-RMLNDC002001.CEL  
 80-F-LY-RMLNDC003001.CEL  
 81-PP-FDC\_GSM481978.CEL  
 82-PP-FDC\_GSM481978.CEL  
 83-PP-FDC\_GSM481978.CEL  
 84-Lymph-endo-cells\_GSM143704.CEL  
 85-MS-1\_GSM234692.CEL  
 86-LTcell\_GSM465596.CEL  
 87-Nat Helper cell\_GSM465593.CEL  
 88-Nat Helper cell\_GSM465593.CEL  
 89-Chondrocytes\_GSM266741.CEL  
 90-Chondrocytes\_GSM266741.CEL  
 91-Osteoblast-d5\_GSM258741.CEL  
 92-Osteoblast-d5\_GSM258741.CEL  
 93-Osteoblast-d14\_GSM258737.CEL  
 94-Osteoblast-d14\_GSM258737.CEL  
 95-Osteoblast-d21\_GSM258738.CEL  
 96-Osteoblast-d21\_GSM258738.CEL  
 97-10T12\_GSM258632.CEL  
 98-10T12\_GSM258632.CEL  
 99-3T3-L1\_GSM258609.CEL  
 100-3T3-L1\_GSM258610.CEL  
 101-NH3T3\_GSM258739.CEL  
 102-NH3T3\_GSM258739.CEL  
 103-C2C12\_GSM258629.CEL  
 104-C2C12\_GSM258629.CEL  
 105-Bruce4\_GSM258690.CEL  
 106-Bruce4\_GSM258690.CEL  
 107-MIMCD3\_GSM258723.CEL  
 108-MIMCD3\_GSM258723.CEL  
 109-mim6\_GSM258725.CEL  
 110-mim6\_GSM258725.CEL  
 111-Astrocytes\_GSM241898.CEL  
 112-Astrocytes\_GSM241898.CEL  
 113-Spleen\_GSM258768.CEL  
 114-Spleen\_GSM258768.CEL  
 115-Neuro2a\_GSM258728.CEL  
 116-Neuro2a\_GSM258728.CEL  
 117-Lymph-nodes\_GSM258691.CEL  
 118-Lymph-nodes\_GSM258691.CEL  
 119-Intestine-small\_GSM258677.CEL  
 120-Intestine-small\_GSM258677.CEL  
 121-Intestine-large\_GSM258676.CEL  
 122-Intestine-large\_GSM258676.CEL  
 123-Colon-d4\_GSM198810.CEL  
 124-Colon-d4\_GSM198810.CEL  
 125-Colon-d9\_GSM198810.CEL  
 126-Colon-d9\_GSM198810.CEL  
 127-NALT\_GSM289408.CEL  
 128-NALT\_GSM289408.CEL  
 129-NALT\_GSM289410.CEL  
 130-NALT\_GSM289411.CEL







Cluster0278\_High in phagocytes (7 nodes)

3,758  
3,560.2  
3,362.4  
3,164.6  
2,966.8  
2,769  
2,571.2  
2,373.5  
2,175.7  
1,977.9  
1,780.1  
1,582.3  
1,384.5  
1,186.7  
988.9  
791.2  
593.4  
395.6  
197.8  
0

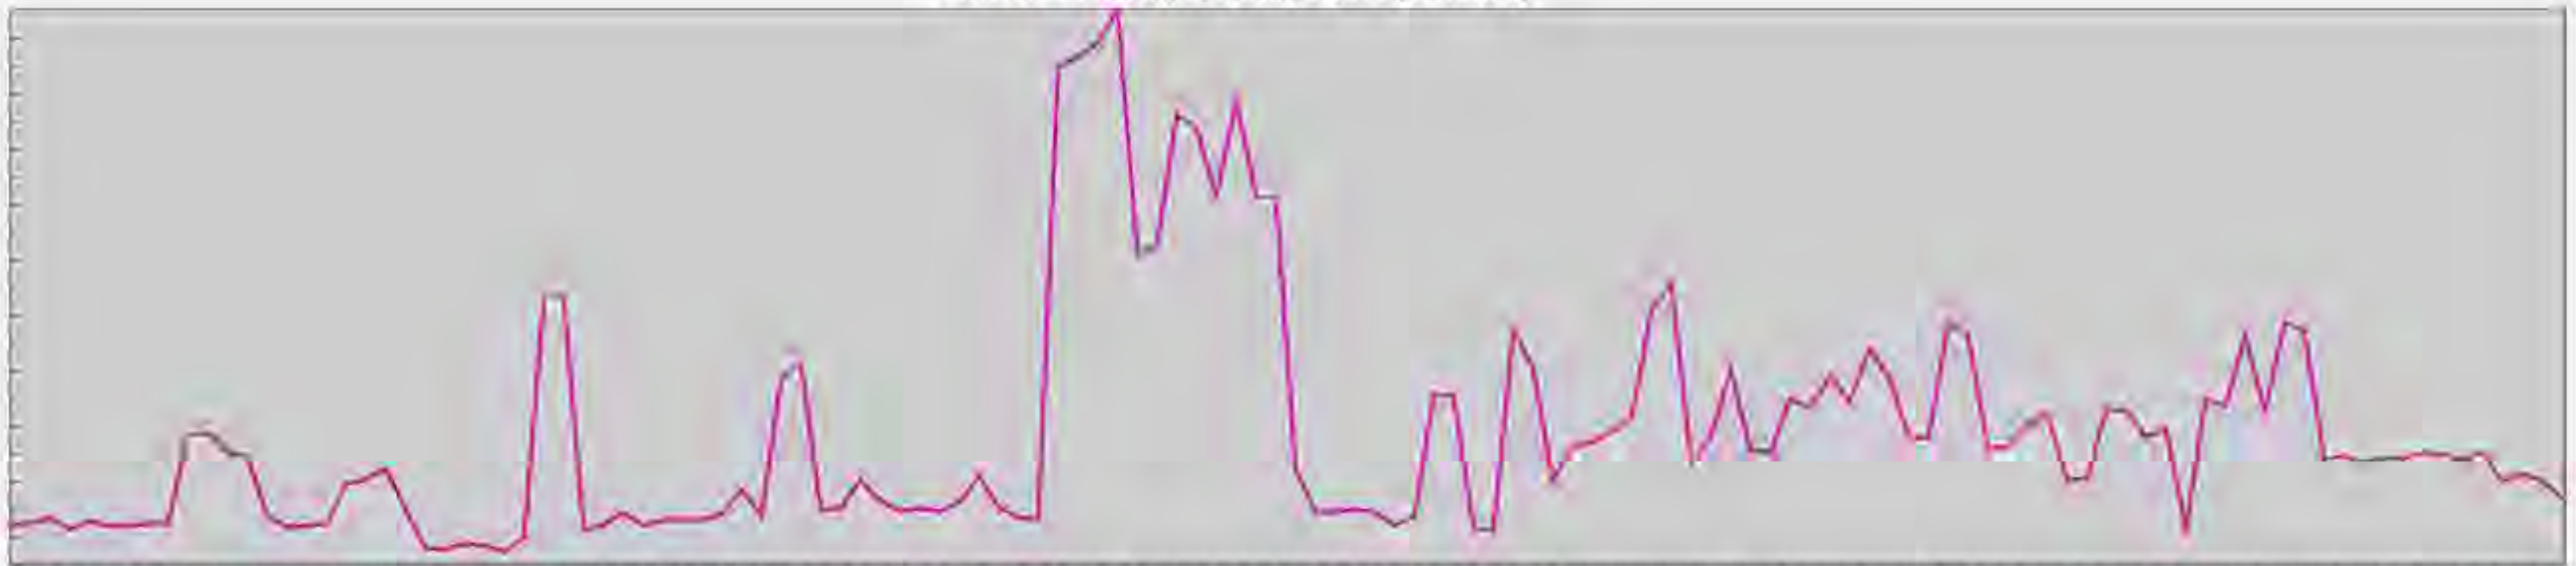

130-NALT GSM289411.CEL  
129-NALT GSM289410.CEL  
128-NALT GSM289409.CEL  
127-NALT GSM289408.CEL  
126-Column-d9 GSM1988105.CEL  
125-Column-d9 GSM1988104.CEL  
124-Column-d9 GSM1988103.CEL  
123-Column-d4 GSM1988102.CEL  
122-Column-d4 GSM1988101.CEL  
121-Intestine-large GSM258676.CEL  
120-Intestine-large GSM258675.CEL  
119-Intestine-small GSM258678.CEL  
118-Intestine-small GSM258692.CEL  
117-Lymph-nodes GSM258691.CEL  
116-Lymph-nodes GSM258726.CEL  
115-Spleen GSM258768.CEL  
114-Spleen GSM258767.CEL  
113-Neuro2a GSM258728.CEL  
112-Neuro2a GSM258727.CEL  
111-Astrocytes GSM241898.CEL  
110-mim6 GSM258725.CEL  
109-mim6 GSM258724.CEL  
108-MIMCD3 GSM258723.CEL  
107-MIMCD3 GSM258722.CEL  
106-Bruce4 GSM258665.CEL  
105-Bruce4 GSM258666.CEL  
104-C2C12 GSM258690.CEL  
103-C2C12 GSM258629.CEL  
102-NH3T3 GSM258739.CEL  
101-NH3T3 GSM258738.CEL  
100-3T3-L1 GSM258610.CEL  
99-3T3-L1 GSM258609.CEL  
98-10T12 GSM258632.CEL  
97-10T12 GSM258631.CEL  
96-Osteoblast-d21 GSM258740.CEL  
95-Osteoblast-d21 GSM258739.CEL  
94-Osteoblast-d14 GSM258738.CEL  
93-Osteoblast-d14 GSM258737.CEL  
92-Osteoblast-d5 GSM258742.CEL  
91-Osteoblast-d5 GSM258741.CEL  
90-Chondrocytes GSM266741.CEL  
89-Chondrocytes GSM266740.CEL  
88-Nat Helper cell GSM465594.CEL  
87-Nat Helper cell GSM465593.CEL  
86-LT cell GSM465596.CEL  
85-MS-1 GSM234692.CEL  
84-Lymph-endo-cells GSM143704.CEL  
83-Lymph-endo-cells GSM481977.CEL  
82-Lymph-endo-cells GSM481978.CEL  
81-Lymph-endo-cells GSM481976.CEL  
80-Lymph-endo-cells GSM481977.CEL  
79-Lymph-endo-cells GSM481978.CEL  
78-Follicular-Bcells GSM258664.CEL  
77-Follicular-Bcells GSM258665.CEL  
76-MZ-Bcell GSM258622.CEL  
75-MZ-Bcell GSM258621.CEL  
74-BAF3 GSM258620.CEL  
73-BAF3 GSM258619.CEL  
72-Tregs GSM258778.CEL  
71-Tregs GSM258777.CEL  
70-T-cells-CD8+ GSM258776.CEL  
69-T-cells-CD8+ GSM258775.CEL  
68-T-cells-CD4+ GSM258774.CEL  
67-T-cells-CD4+ GSM258773.CEL  
66-Thymocyte-DN GSM465595.CEL  
65-Osteoclasts GSM258744.CEL  
64-Osteoclasts GSM258743.CEL  
63-Microglia GSM258722.CEL  
62-Microglia GSM258721.CEL  
61-PMN-LPS-7h GSM258706.CEL  
60-PMN-LPS-7h GSM258705.CEL  
59-PMN-LPS-6h GSM258702.CEL  
58-PMN-LPS-6h GSM258701.CEL  
57-BMM-LPS-6h GSM258699.CEL  
56-BMM-LPS-6h GSM258699.CEL  
55-BMM-LPS-6h GSM258699.CEL  
54-BMM-LPS-6h GSM258699.CEL  
53-Plasmacytoid-DC GSM258650.CEL  
52-Plasmacytoid-DC GSM258649.CEL  
51-CD8a-DC GSM258648.CEL  
50-CD8a-DC GSM258647.CEL  
49-CD8a+DC GSM258646.CEL  
48-CD8a+DC GSM258645.CEL  
47-NK-cells GSM258732.CEL  
46-NK-cells GSM258731.CEL  
45-Mast-cells-IgE+Ad GSM258718.CEL  
44-Mast-cells-IgE+Ad GSM258717.CEL  
43-Mast-cells-IgE GSM258714.CEL  
42-Mast-cells-IgE GSM258713.CEL  
41-Mast-cells GSM258712.CEL  
40-Granulocytes GSM258668.CEL  
39-Granulocytes GSM258667.CEL  
38-GMP GSM258666.CEL  
37-GMP GSM258665.CEL  
36-GMP GSM258664.CEL  
35-CMP GSM258642.CEL  
34-CMP GSM258641.CEL  
33-MEP GSM258720.CEL  
32-MEP GSM258719.CEL  
31-MEP GSM258718.CEL  
30-H1hESC GSM258770.CEL  
29-Bone marrow GSM258628.CEL  
28-Bone marrow GSM258627.CEL  
27-Paneth-cells-GF GSM116358.CEL  
26-Paneth-cells-GF-1 GSM116357.CEL  
25-Paneth-cells GSM116350.CEL  
24-Paneth-cells GSM116359.CEL  
23-Paneth-cells GSM318589.CEL  
22-Paneth-cells GSM318590.CEL  
21-Column-Crypt GSM480375.CEL  
20-Column-Crypt GSM480374.CEL  
19-Column-Vill GSM480363.CEL  
18-Column-Vill GSM480362.CEL  
17-Column-IEC-GF GSM349880.CEL  
16-Column-IEC-GF GSM350375.CEL  
15-Ileum-IEC-GF GSM350376.CEL  
14-Ileum-IEC GSM350371.CEL  
13-Small-intestine-epithelium RMINEP002901.CEL  
12-Small-intestine-epithelium RMINEP001001.CEL  
11-FAE-RMPYEP002001.CEL  
10-FAE-RMPYEP001001.CEL  
09-Ileum-IEC GSM190797.CEL  
08-Ileum-IEC GSM190796.CEL  
07-Ileum-IEC GSM190795.CEL  
06-CT-v-M-cells GSM190794.CEL  
05-CT-v-M-cells GSM190793.CEL  
04-CT-v-M-cells GSM190792.CEL  
03-PP-M-cells GSM190791.CEL  
02-PP-M-cells GSM190790.CEL  
01-PP-M-cells GSM190789.CEL



Cluster0279\_High in NH cells and min6 cells (7 nodes)

708.8  
671.5  
634.2  
596.9  
559.6  
522.3  
485  
447.6  
410.3  
373  
335.7  
298.4  
261.1  
223.8  
186.5  
149.2  
111.9  
74.6  
37.3  
0

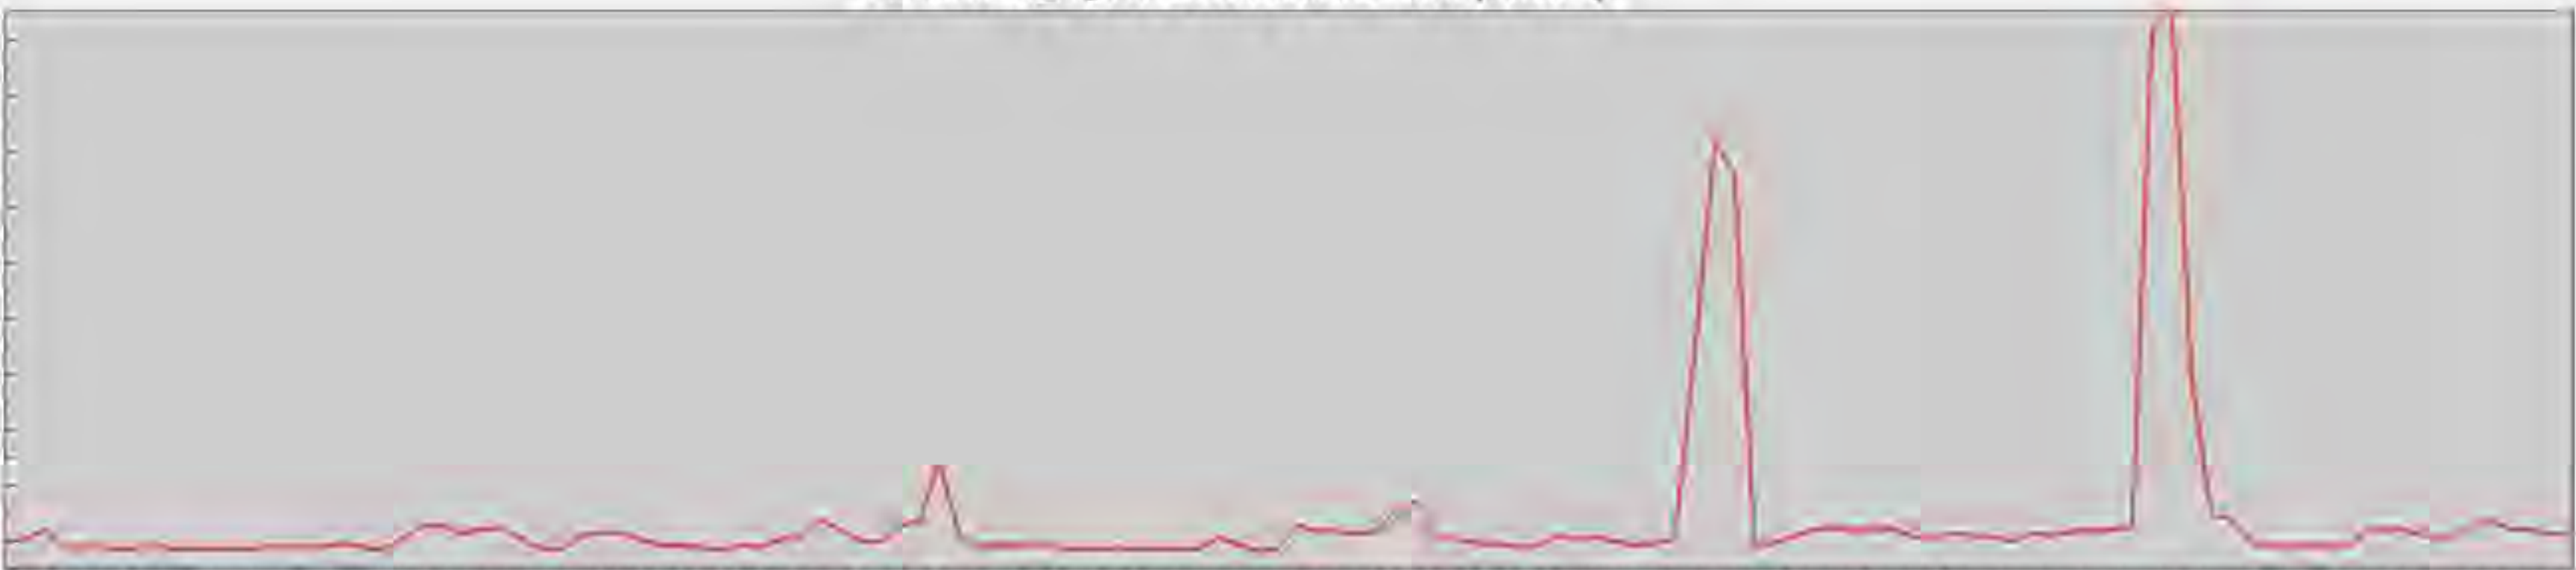

01- PP-M-cells GSM190789.CEL  
 02- PP-M-cells GSM190790.CEL  
 03- PP-M-cells GSM190791.CEL  
 04- CT-v-M-cells GSM190792.CEL  
 05- CT-v-M-cells GSM190793.CEL  
 06- CT-v-M-cells GSM190794.CEL  
 07- Ileum-IEC GSM190795.CEL  
 08- Ileum-IEC GSM190796.CEL  
 09- Ileum-IEC GSM190797.CEL  
 10- FAE-RMPYEP001001.CEL  
 11- FAE-RMPYEP002001.CEL  
 12- Small-intestine-epithelium\_RMINEP001001.CEL  
 13- Small-intestine-epithelium\_RMINEP002001.CEL  
 14- Ileum-IEC GSM350371.CEL  
 15- Ileum-IEC GSM350375.CEL  
 16- Colon-VIII GSM480362.CEL  
 17- Colon-VIII GSM480363.CEL  
 18- Colon-VIII GSM480364.CEL  
 19- Colon-VIII GSM480365.CEL  
 20- Colon-Crypt GSM480374.CEL  
 21- Colon-Crypt GSM480375.CEL  
 22- Paneth-cells GSM318589.CEL  
 23- Paneth-cells GSM318590.CEL  
 24- Paneth-cells GSM116359.CEL  
 25- Paneth-cells GSM116359.CEL  
 26- Paneth-cells-GF-1 GSM116357.CEL  
 27- Paneth-cells-GF-1 GSM116357.CEL  
 28- Bone marrow GSM258627.CEL  
 29- Bone marrow GSM258627.CEL  
 30- HSC GSM258770.CEL  
 31- HSC GSM258770.CEL  
 32- MIEP GSM258771.CEL  
 33- MIEP GSM258771.CEL  
 34- MIEP GSM258854.CEL  
 35- CMP GSM258864.CEL  
 36- CMP GSM258864.CEL  
 37- GMP GSM258866.CEL  
 38- GMP GSM258866.CEL  
 39- Granulocytes GSM258667.CEL  
 40- Mast-cells GSM258712.CEL  
 41- Mast-cells GSM258712.CEL  
 42- Mast-cells-IgE GSM258714.CEL  
 43- Mast-cells-IgE GSM258714.CEL  
 44- Mast-cells-IgE+Ad GSM258718.CEL  
 45- Mast-cells-IgE+Ad GSM258718.CEL  
 46- NK-cells GSM258731.CEL  
 47- NK-cells GSM258731.CEL  
 48- CD8a+DC GSM258646.CEL  
 49- CD8a+DC GSM258646.CEL  
 50- CD8a-DC GSM258647.CEL  
 51- CD8a-DC GSM258647.CEL  
 52- Plasmacytoid-DC GSM258650.CEL  
 53- Plasmacytoid-DC GSM258650.CEL  
 54- BMM GSM258694.CEL  
 55- BMM GSM258694.CEL  
 56- BMM-LPS-6h GSM258699.CEL  
 57- BMM-LPS-6h GSM258699.CEL  
 58- PMM-LPS-7h GSM258702.CEL  
 59- PMM-LPS-7h GSM258702.CEL  
 60- PMM-LPS-7h GSM258706.CEL  
 61- PMM-LPS-7h GSM258706.CEL  
 62- Microglia GSM258721.CEL  
 63- Microglia GSM258721.CEL  
 64- Osteoclasts GSM258743.CEL  
 65- Osteoclasts GSM258744.CEL  
 66- Thymocyte-DN GSM465595.CEL  
 67- T-cells-CD4+ GSM258773.CEL  
 68- T-cells-CD4+ GSM258773.CEL  
 69- T-cells-CD8+ GSM258776.CEL  
 70- T-cells-CD8+ GSM258776.CEL  
 71- Tregs GSM258778.CEL  
 72- Tregs GSM258778.CEL  
 73- BAF3 GSM258819.CEL  
 74- BAF3 GSM258820.CEL  
 75- MZ-Bcell GSM258821.CEL  
 76- MZ-Bcell GSM258821.CEL  
 77- Follicular-B-cells GSM258853.CEL  
 78- Follicular-B-cells GSM258853.CEL  
 79- E-L-RMLNDC002001.CEL  
 80- E-L-RMLNDC003001.CEL  
 81- PP-FDC GSM481976.CEL  
 82- PP-FDC GSM481976.CEL  
 83- PP-FDC GSM481977.CEL  
 84- Lymph-endo-cells GSM143704.CEL  
 85- MS-1 GSM234692.CEL  
 86- Tt cell GSM465596.CEL  
 87- Nat Helper cell GSM465594.CEL  
 88- Nat Helper cell GSM465594.CEL  
 89- Chondrocytes GSM266741.CEL  
 90- Chondrocytes GSM266741.CEL  
 91- Osteoblast-d5 GSM258741.CEL  
 92- Osteoblast-d5 GSM258742.CEL  
 93- Osteoblast-d14 GSM258737.CEL  
 94- Osteoblast-d14 GSM258738.CEL  
 95- Osteoblast-d21 GSM258740.CEL  
 96- Osteoblast-d21 GSM258739.CEL  
 97- 10T12 GSM258631.CEL  
 98- 10T12 GSM258632.CEL  
 99- 3T3-L1 GSM258609.CEL  
 100- 3T3-L1 GSM258610.CEL  
 101- NIH3T3 GSM258739.CEL  
 102- NIH3T3 GSM258739.CEL  
 103- C2C12 GSM258829.CEL  
 104- C2C12 GSM258830.CEL  
 105- Bruce4 GSM258856.CEL  
 106- Bruce4 GSM258856.CEL  
 107- MIMCD3 GSM258723.CEL  
 108- MIMCD3 GSM258723.CEL  
 109- min6 GSM258725.CEL  
 110- min6 GSM258725.CEL  
 111- Astrocytes GSM241898.CEL  
 112- Astrocytes GSM241898.CEL  
 113- Neuro2a GSM258728.CEL  
 114- Spleen GSM258767.CEL  
 115- Spleen GSM258768.CEL  
 116- Lymph-nodes GSM258691.CEL  
 117- Lymph-nodes GSM258691.CEL  
 118- Intestine-small GSM258692.CEL  
 119- Intestine-small GSM258692.CEL  
 120- Intestine-large GSM258675.CEL  
 121- Intestine-large GSM258675.CEL  
 122- Colon-d4 GSM198101.CEL  
 123- Colon-d4 GSM198101.CEL  
 124- Colon-d9 GSM198103.CEL  
 125- Colon-d9 GSM198103.CEL  
 126- Colon-d9 GSM198104.CEL  
 127- NALT GSM289408.CEL  
 128- NALT GSM289409.CEL  
 129- NALT GSM289410.CEL  
 130- NALT GSM289411.CEL



Cluster0280\_Uncertain (7 nodes)

424.1  
401.8  
379.5  
357.1  
334.8  
312.5  
290.2  
267.9  
245.5  
223.2  
200.9  
178.6  
156.2  
133.9  
111.6  
89.3  
67  
44.6  
22.3  
0

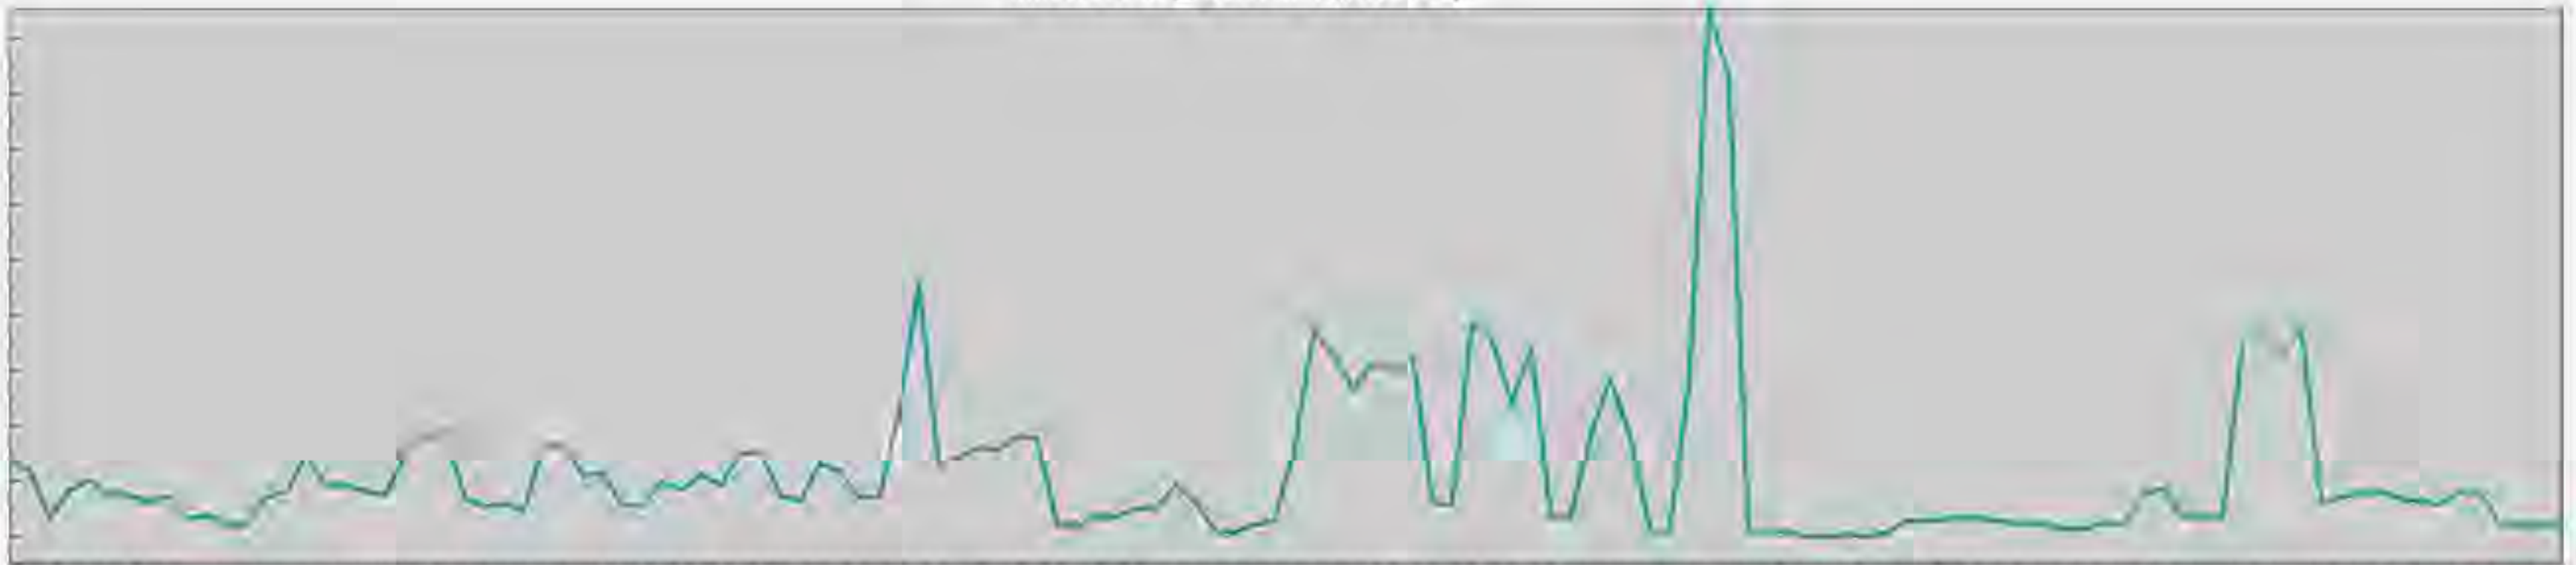

130-NALT GSM289411.CEL  
129-NALT GSM289410.CEL  
128-NALT GSM289409.CEL  
127-NALT GSM289408.CEL  
126-Colon-d9 GSM1988105.CEL  
125-Colon-d9 GSM1988104.CEL  
124-Colon-d9 GSM1988103.CEL  
123-Colon-d4 GSM1988102.CEL  
122-Colon-d4 GSM1988101.CEL  
121-Intestine-large GSM258676.CEL  
120-Intestine-large GSM258675.CEL  
119-Intestine-small GSM258678.CEL  
118-Intestine-small GSM258692.CEL  
117-Lymph-nodes GSM258691.CEL  
116-Lymph-nodes GSM258726.CEL  
115-Spleen GSM258768.CEL  
114-Spleen GSM258767.CEL  
113-Neuro2a GSM258728.CEL  
112-Neuro2a GSM258727.CEL  
111-Astrocytes GSM241898.CEL  
110-mim6 GSM258726.CEL  
109-mim6 GSM258725.CEL  
108-MIMCD3 GSM258724.CEL  
107-MIMCD3 GSM258723.CEL  
106-Bruce4 GSM258656.CEL  
105-Bruce4 GSM258655.CEL  
104-C2C12 GSM258690.CEL  
103-C2C12 GSM258629.CEL  
102-NH3T3 GSM258730.CEL  
101-NH3T3 GSM258729.CEL  
100-3T3-L1 GSM258610.CEL  
99-3T3-L1 GSM258609.CEL  
98-10T12 GSM258632.CEL  
97-10T12 GSM258631.CEL  
96-Osteoblast-d21 GSM258740.CEL  
95-Osteoblast-d21 GSM258739.CEL  
94-Osteoblast-d14 GSM258738.CEL  
93-Osteoblast-d14 GSM258737.CEL  
92-Osteoblast-d5 GSM258742.CEL  
91-Osteoblast-d5 GSM258741.CEL  
90-Chondrocytes GSM266741.CEL  
89-Chondrocytes GSM266740.CEL  
88-Nat Helper cell GSM465594.CEL  
87-Nat Helper cell GSM465593.CEL  
86-LT cell GSM465596.CEL  
85-MS-1 GSM234692.CEL  
84-Lymph-endo-cells GSM143704.CEL  
83-PP-FDC GSM481977.CEL  
82-PP-FDC GSM481978.CEL  
81-PP-FDC GSM481976.CEL  
80-LY RMLNDCC003001.CEL  
79-LY RMLNDCC003001.CEL  
78-Follicular-Bcells GSM258664.CEL  
77-Follicular-Bcells GSM258663.CEL  
76-MZ-Bcell GSM258622.CEL  
75-MZ-Bcell GSM258621.CEL  
74-BAF3 GSM258620.CEL  
73-BAF3 GSM258619.CEL  
72-Tregs GSM258778.CEL  
71-Tregs GSM258777.CEL  
70-T-cells-CD8+ GSM258776.CEL  
69-T-cells-CD8+ GSM258774.CEL  
68-T-cells-CD4+ GSM258773.CEL  
67-T-cells-CD4+ GSM258773.CEL  
66-Thymocyte-DN GSM465595.CEL  
65-Osteoclasts GSM258743.CEL  
64-Osteoclasts GSM258744.CEL  
63-Microglia GSM258721.CEL  
62-Microglia GSM258721.CEL  
61-MM-LPS-7h GSM258706.CEL  
60-MM-LPS-7h GSM258705.CEL  
59-MM-LPS-6h GSM258702.CEL  
58-MM-LPS-6h GSM258701.CEL  
57-MM-LPS-6h GSM258699.CEL  
56-MM-LPS-6h GSM258699.CEL  
55-MM-LPS-6h GSM258694.CEL  
54-Plasmacytoid-DC GSM258650.CEL  
53-Plasmacytoid-DC GSM258649.CEL  
52-CD8a-DC GSM258647.CEL  
51-CD8a-DC GSM258647.CEL  
50-CD8a+DC GSM258646.CEL  
49-CD8a+DC GSM258646.CEL  
48-NK-cells GSM258732.CEL  
47-NK-cells GSM258731.CEL  
46-NK-cells GSM258731.CEL  
45-Mast-cells-IgE+Ad GSM258718.CEL  
44-Mast-cells-IgE+Ad GSM258717.CEL  
43-Mast-cells-IgE GSM258714.CEL  
42-Mast-cells-IgE GSM258713.CEL  
41-Mast-cells GSM258712.CEL  
40-Granulocytes GSM258668.CEL  
39-Granulocytes GSM258667.CEL  
38-GMP GSM258666.CEL  
37-GMP GSM258666.CEL  
36-GMP GSM258665.CEL  
35-GMP GSM258642.CEL  
34-MEP GSM258641.CEL  
33-MEP GSM258720.CEL  
32-MEP GSM258719.CEL  
31-HESC GSM258770.CEL  
30-HESC GSM258769.CEL  
29-Bone marrow GSM258628.CEL  
28-Bone marrow GSM258627.CEL  
27-paneth-cells-GE GSM116358.CEL  
26-paneth-cells-GE GSM116357.CEL  
25-paneth-cells GSM116350.CEL  
24-paneth-cells GSM116359.CEL  
23-paneth-cells GSM318589.CEL  
22-paneth-cells GSM318590.CEL  
21-Colon-Crypt GSM480375.CEL  
20-Colon-Crypt GSM480374.CEL  
19-Colon-Vill GSM480363.CEL  
18-Colon-Vill GSM480362.CEL  
17-Colon-IEC-GE GSM349880.CEL  
16-Colon-IEC-GE GSM350375.CEL  
15-Ileum-IEC GSM350376.CEL  
14-Ileum-IEC GSM350371.CEL  
13-Small-intestine-epithelium RMINEP002001.CEL  
12-Small-intestine-epithelium RMINEP001001.CEL  
11-FAE RMPYEP002001.CEL  
10-FAE RMPYEP001001.CEL  
09-Ileum-IEC GSM190797.CEL  
08-Ileum-IEC GSM190796.CEL  
07-Ileum-IEC GSM190795.CEL  
06-CT-w-M-cells GSM190794.CEL  
05-CT-w-M-cells GSM190793.CEL  
04-CT-v-M-cells GSM190792.CEL  
03-PP-M-cells GSM190791.CEL  
02-PP-M-cells GSM190790.CEL  
01-PP-M-cells GSM190789.CEL



Cluster0281\_Uncertain (7 nodes)

784.1  
742.8  
701.6  
660.3  
619  
577.8  
536.5  
495.2  
454  
412.7  
371.4  
330.1  
288.9  
247.6  
206.3  
165.1  
123.8  
82.5  
41.3  
0

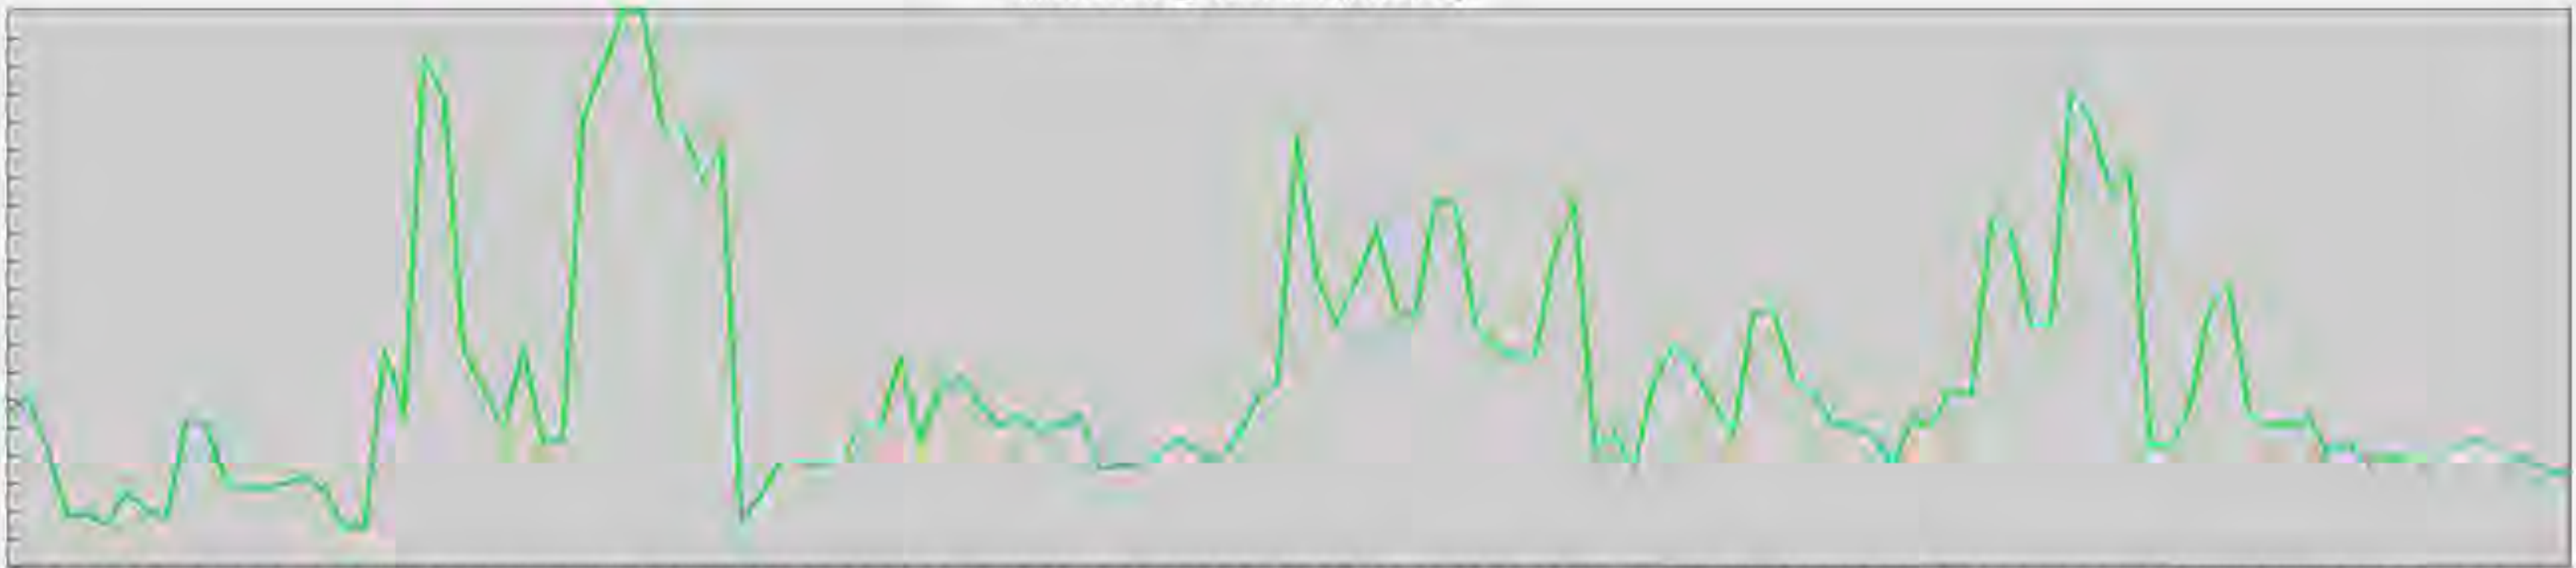

130-NAL1 GSM289411.CEL  
129-NAL2 GSM289410.CEL  
128-NAL3 GSM289409.CEL  
127-NAL4 GSM289408.CEL  
126-NAL5 GSM1988105.CEL  
125-NAL6 GSM1988104.CEL  
124-NAL7 GSM1988103.CEL  
123-NAL8 GSM1988102.CEL  
122-NAL9 GSM1988101.CEL  
121-Intestine-large GSM258676.CEL  
120-Intestine-large GSM258675.CEL  
119-Intestine-small GSM258678.CEL  
118-Intestine-small GSM258692.CEL  
117-Lymph-nodes GSM258691.CEL  
116-Lymph-nodes GSM258726.CEL  
115-Spleen GSM258768.CEL  
114-Spleen GSM258767.CEL  
113-Neuro2a GSM258728.CEL  
112-Neuro2a GSM258727.CEL  
111-Astrocytes GSM241898.CEL  
110-ming GSM258726.CEL  
109-ming GSM258725.CEL  
108-MIMCD3 GSM258724.CEL  
107-MIMCD3 GSM258723.CEL  
106-Bruce4 GSM258656.CEL  
105-Bruce4 GSM258655.CEL  
104-C2C12 GSM258690.CEL  
103-C2C12 GSM258629.CEL  
102-NH3T3 GSM258739.CEL  
101-NH3T3 GSM258739.CEL  
100-3T3-L1 GSM258610.CEL  
99-3T3-L1 GSM258609.CEL  
98-10T12 GSM258631.CEL  
97-10T12 GSM258631.CEL  
96-Osteoblast-d21 GSM258740.CEL  
95-Osteoblast-d21 GSM258739.CEL  
94-Osteoblast-d14 GSM258738.CEL  
93-Osteoblast-d14 GSM258737.CEL  
92-Osteoblast-d5 GSM258742.CEL  
91-Osteoblast-d5 GSM258741.CEL  
90-Chondrocytes GSM266741.CEL  
89-Chondrocytes GSM266740.CEL  
88-Nat Helper cell GSM465594.CEL  
87-Nat Helper cell GSM465593.CEL  
86-LT cell GSM465596.CEL  
85-MS-1 GSM234692.CEL  
84-Lymph-endo-cells GSM143704.CEL  
83-PP-FDC GSM481977.CEL  
82-PP-FDC GSM481978.CEL  
81-PP-FDC GSM481976.CEL  
80-F-LY RMLNDCC003001.CEL  
79-F-LY RMLNDCC003001.CEL  
78-Follicular-Bcells GSM258664.CEL  
77-Follicular-Bcells GSM258663.CEL  
76-MZ-Bcell GSM258622.CEL  
75-MZ-Bcell GSM258621.CEL  
74-BAF3 GSM258620.CEL  
73-BAF3 GSM258619.CEL  
72-Tregs GSM258778.CEL  
71-Tregs GSM258777.CEL  
70-T-cells-CD8+ GSM258776.CEL  
69-T-cells-CD8+ GSM258775.CEL  
68-T-cells-CD4+ GSM258774.CEL  
67-T-cells-CD4+ GSM258773.CEL  
66-Thymocyte-DN GSM465595.CEL  
65-Osteoclasts GSM258744.CEL  
64-Microglia GSM258721.CEL  
63-Microglia GSM258721.CEL  
62-PM-M-7h GSM258706.CEL  
61-PM-M-7h GSM258706.CEL  
60-PM-M-LPS-7h GSM268705.CEL  
59-PM-M-LPS-7h GSM268702.CEL  
58-PM-M-LPS-6h GSM258701.CEL  
57-PM-M-LPS-6h GSM258700.CEL  
56-PM-M-LPS-6h GSM258699.CEL  
55-BMM-GSM258694.CEL  
54-BMM-GSM258694.CEL  
53-Plasmacytoid-DC GSM258650.CEL  
52-Plasmacytoid-DC GSM258649.CEL  
51-CD8a-DC GSM258648.CEL  
50-CD8a-DC GSM258647.CEL  
49-CD8a+DC GSM258646.CEL  
48-CD8a+DC GSM258645.CEL  
47-NK-cells GSM258732.CEL  
46-NK-cells GSM258731.CEL  
45-Mast-cells-IgE+Ad GSM258718.CEL  
44-Mast-cells-IgE+Ad GSM258717.CEL  
43-Mast-cells-IgE GSM258714.CEL  
42-Mast-cells-IgE GSM258713.CEL  
41-Mast-cells GSM258712.CEL  
40-Granulocytes GSM258668.CEL  
39-Granulocytes GSM258667.CEL  
38-GMP GSM258666.CEL  
37-GMP GSM258665.CEL  
36-GMP GSM258664.CEL  
35-CMP GSM258642.CEL  
34-MEP GSM258720.CEL  
33-MEP GSM258719.CEL  
32-MEP GSM258719.CEL  
31-HSC GSM258770.CEL  
30-HSC GSM258770.CEL  
29-Bone marrow GSM258628.CEL  
28-Bone marrow GSM258627.CEL  
27-Paneth-cells-GF GSM116358.CEL  
26-Paneth-cells-GF-1 GSM116357.CEL  
25-Paneth-cells GSM116350.CEL  
24-Paneth-cells GSM116359.CEL  
23-Paneth-cells GSM318589.CEL  
22-Paneth-cells GSM318590.CEL  
21-Colon-Crypt GSM480375.CEL  
20-Colon-Crypt GSM480374.CEL  
19-Colon-Vill GSM480363.CEL  
18-Colon-Vill GSM480362.CEL  
17-Colon-IEC-GF GSM349880.CEL  
16-Colon-IEC-GF GSM350375.CEL  
15-Ileum-IEC GSM350376.CEL  
14-Ileum-IEC GSM350371.CEL  
13-Small-intestine-epithelium RMINEP002901.CEL  
12-Small-intestine-epithelium RMINEP001001.CEL  
11-FAE RMPYEP002001.CEL  
10-FAE RMPYEP001001.CEL  
09-Ileum-IEC GSM190797.CEL  
08-Ileum-IEC GSM190796.CEL  
07-Ileum-IEC GSM190795.CEL  
06-CT-v-M-cells GSM190794.CEL  
05-CT-v-M-cells GSM190793.CEL  
04-CT-v-M-cells GSM190792.CEL  
03-PP-M-cells GSM190791.CEL  
02-PP-M-cells GSM190790.CEL  
01-PP-M-cells GSM190789.CEL



Cluster0282\_High in microglia (7 nodes)

11,605.6  
10,994.7  
10,383.9  
9,773.1  
9,162.3  
8,551.5  
7,940.6  
7,329.8  
6,719  
6,108.2  
5,497.4  
4,886.6  
4,275.7  
3,664.9  
3,054.1  
2,443.3  
1,832.5  
1,221.6  
610.8  
0

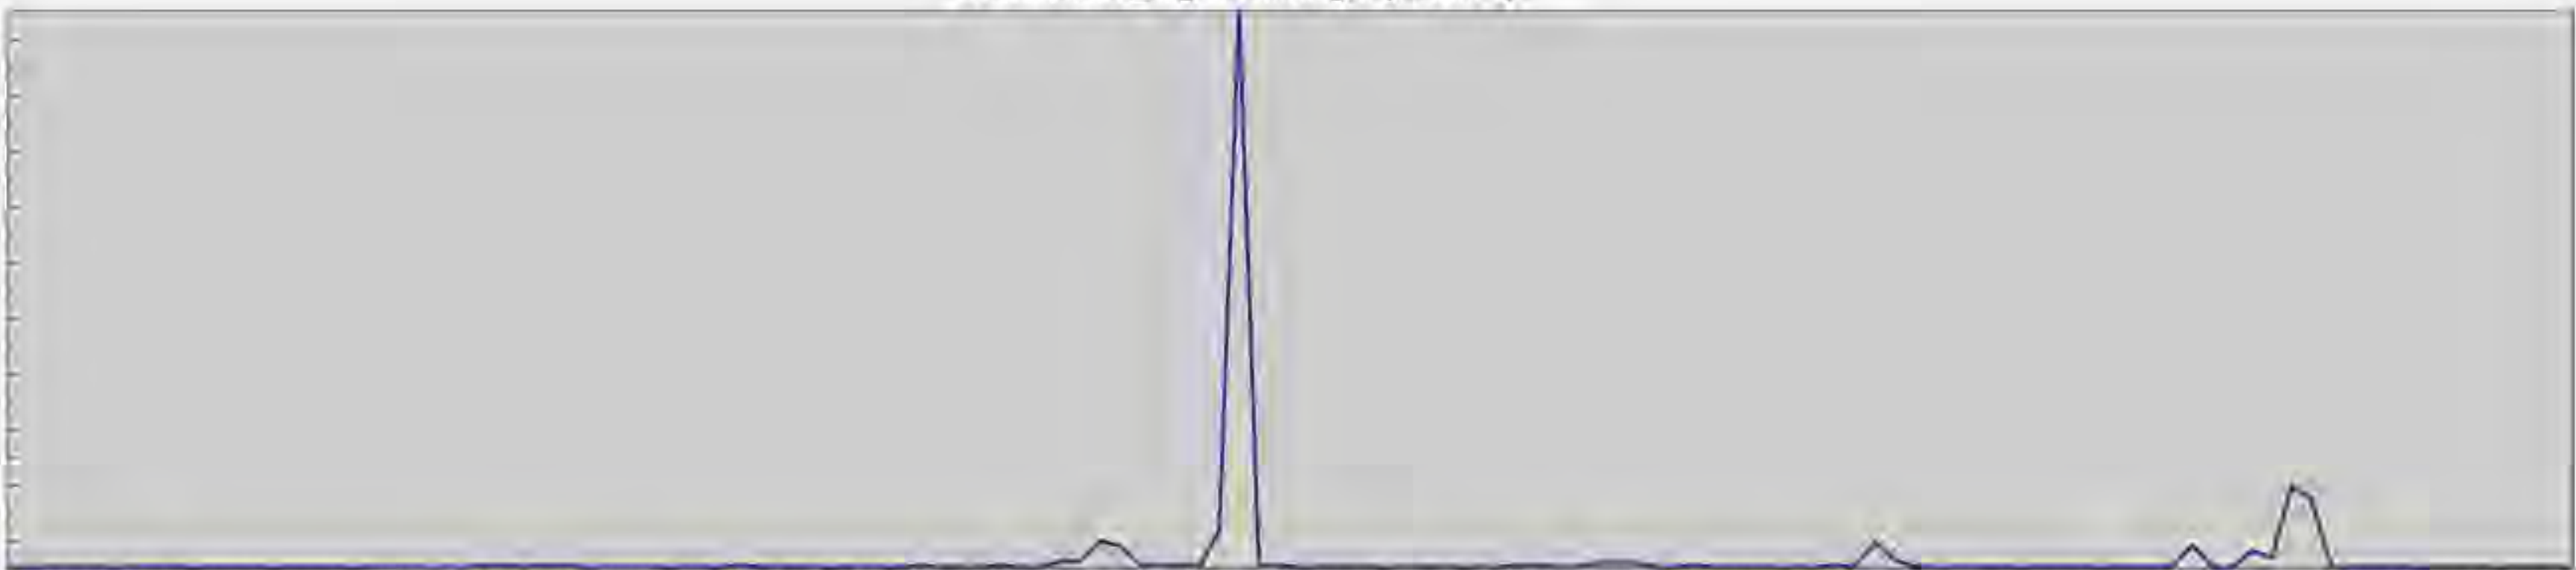

30-NALT GSM289411 CELL  
129-NALT GSM289410 CELL  
128-NALT GSM289409 CELL  
127-NALT GSM289408 CELL  
126-Color-d9 GSM1988105 CELL  
125-Color-d9 GSM1988104 CELL  
124-Color-d9 GSM1988103 CELL  
123-Color-d4 GSM1988102 CELL  
122-Color-d4 GSM1988101 CELL  
121-Intestine-large GSM258676 CELL  
120-Intestine-large GSM258675 CELL  
119-Intestine-small GSM258677 CELL  
118-Intestine-small GSM258692 CELL  
117-Lymph-nodes GSM258691 CELL  
116-Spleen GSM258766 CELL  
115-Spleen GSM258767 CELL  
114-Spleen GSM258768 CELL  
113-Neuro2a GSM258728 CELL  
112-Neuro2a GSM258729 CELL  
111-Astrocytes GSM241898 CELL  
110-mimb GSM258726 CELL  
109-mimb GSM258725 CELL  
108-MIMCD3 GSM258724 CELL  
107-MIMCD3 GSM258723 CELL  
106-Bruce4 GSM258656 CELL  
105-Bruce4 GSM258655 CELL  
104-C2C12 GSM258690 CELL  
103-C2C12 GSM258689 CELL  
102-NH3T3 GSM258730 CELL  
101-NH3T3 GSM258729 CELL  
100-3T3-L1 GSM258610 CELL  
99-3T3-L1 GSM258609 CELL  
98-10T1/2 GSM258632 CELL  
97-10T1/2 GSM258631 CELL  
96-Osteoblast-d21 GSM258740 CELL  
95-Osteoblast-d21 GSM258739 CELL  
94-Osteoblast-d14 GSM258738 CELL  
93-Osteoblast-d14 GSM258737 CELL  
92-Osteoblast-d5 GSM258742 CELL  
91-Osteoblast-d5 GSM258741 CELL  
90-Chondrocytes GSM266741 CELL  
89-Chondrocytes GSM266740 CELL  
88-Nat Helper cell GSM465594 CELL  
87-Nat Helper cell GSM465593 CELL  
86-TT cell GSM465596 CELL  
85-MS-1 GSM234692 CELL  
84-Lymph-endo-cells GSM143704 CELL  
83-P-FDC GSM481977 CELL  
82-P-FDC GSM481978 CELL  
81-P-FDC GSM481976 CELL  
80-L-Y RMLNDCC003001 CELL  
79-L-Y RMLNDCC003001 CELL  
78-Follicular-B-cells GSM258664 CELL  
77-Follicular-B-cells GSM258663 CELL  
76-MZ-Bcell GSM258627 CELL  
75-MZ-Bcell GSM258627 CELL  
74-BAF3 GSM258620 CELL  
73-BAF3 GSM258619 CELL  
72-Tregs GSM258778 CELL  
71-Tregs GSM258777 CELL  
70-T-cells-CD8+ GSM258776 CELL  
69-T-cells-CD8+ GSM258774 CELL  
68-T-cells-CD4+ GSM258773 CELL  
67-T-cells-CD4+ GSM258773 CELL  
66-Thymocyte-DN GSM465595 CELL  
65-Osteoclasts GSM258743 CELL  
64-Microglia GSM258727 CELL  
63-Microglia GSM258727 CELL  
62-MM-PS-7h GSM258705 CELL  
61-MM-PS-7h GSM258705 CELL  
60-MM-PS-6h GSM258702 CELL  
59-MM-PS-6h GSM258701 CELL  
58-MM-LPS-6h GSM258699 CELL  
57-MM-LPS-6h GSM258699 CELL  
56-MM-LPS-6h GSM258694 CELL  
55-MM-LPS-6h GSM258694 CELL  
54-Ismacryoid-DC GSM258650 CELL  
53-Ismacryoid-DC GSM258649 CELL  
52-CD8a-DC GSM258648 CELL  
51-CD8a-DC GSM258647 CELL  
50-CD8a-DC GSM258647 CELL  
49-CD8a+DC GSM258646 CELL  
48-CD8a+DC GSM258646 CELL  
47-NK-cells GSM258732 CELL  
46-NK-cells GSM258731 CELL  
45-Mast-cells-IgE+Ad GSM258718 CELL  
44-Mast-cells-IgE+Ad GSM258717 CELL  
43-Mast-cells-IgE GSM258714 CELL  
42-Mast-cells-IgE GSM258713 CELL  
41-Mast-cells GSM258712 CELL  
40-Granulocytes GSM258667 CELL  
39-Granulocytes GSM258667 CELL  
38-MP GSM258666 CELL  
37-MP GSM258665 CELL  
36-MP GSM258665 CELL  
35-MP GSM258642 CELL  
34-MP GSM258641 CELL  
33-MEP GSM258720 CELL  
32-MEP GSM258719 CELL  
31-HESC GSM258770 CELL  
30-HESC GSM258769 CELL  
29-Bone marrow GSM258628 CELL  
28-Bone marrow GSM258627 CELL  
27-paneth-cells-GE GSM116358 CELL  
26-paneth-cells-GE GSM116357 CELL  
25-paneth-cells GSM116350 CELL  
24-paneth-cells GSM116359 CELL  
23-paneth-cells GSM318589 CELL  
22-paneth-cells GSM318590 CELL  
21-paneth-cells GSM480375 CELL  
20-Colon-Crypt GSM480374 CELL  
19-Colon-Vill GSM480363 CELL  
18-Colon-Vill GSM480362 CELL  
17-Colon-IEC-Gf GSM349880 CELL  
16-Colon-IEC-Gf GSM350375 CELL  
15-Ileum-IEC-Gf GSM350376 CELL  
14-Ileum-IEC GSM350371 CELL  
13-Small-intestine-epithelium RMINEP002901 CELL  
12-Small-intestine-epithelium RMINEP001001 CELL  
11-FAE-RMPYEP001001 CELL  
10-FAE-RMPYEP001001 CELL  
9-Ileum-IEC GSM190797 CELL  
8-Ileum-IEC GSM190796 CELL  
7-Ileum-IEC GSM190795 CELL  
6-CT-w-M-cells GSM190794 CELL  
5-CT-w-M-cells GSM190793 CELL  
4-CT-y-M-cells GSM190792 CELL  
3-PP-M-cells GSM190791 CELL  
2-PP-M-cells GSM190790 CELL  
1-PP-M-cells GSM190789 CELL



Cluster0283\_Uncertain-low in many (7 nodes)

121.8  
115.4  
109  
102.6  
96.2  
89.7  
83.3  
76.9  
70.5  
64.1  
57.7  
51.3  
44.9  
38.5  
32.1  
25.6  
19.2  
12.8  
6.4  
0

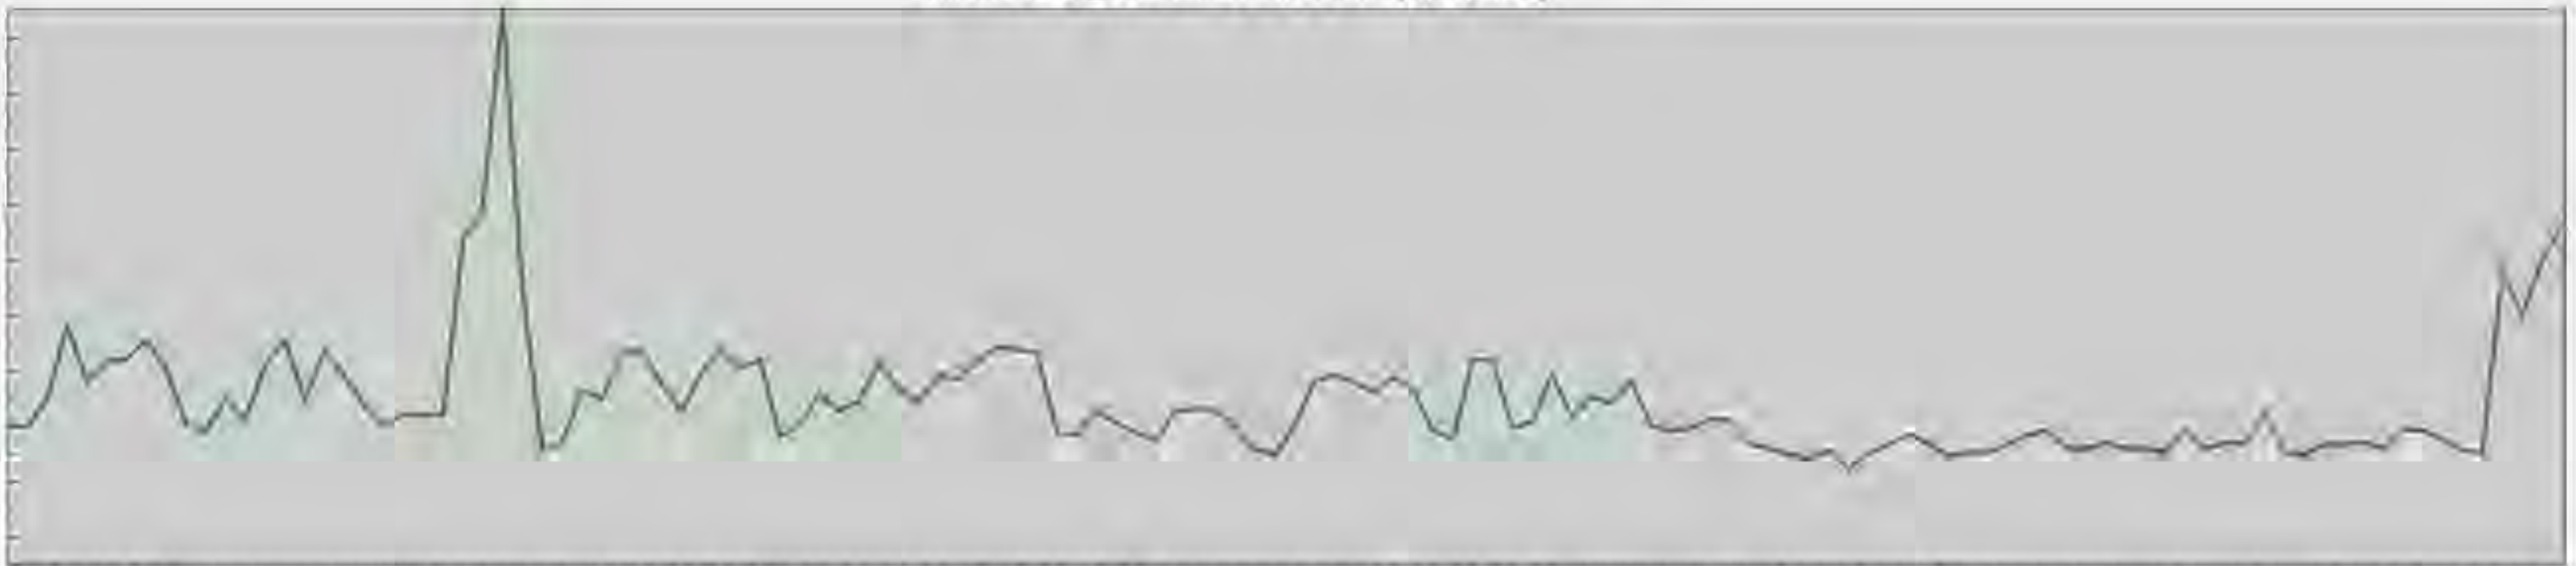

130-NALT GSM289411.CEL  
129-NALT GSM289410.CEL  
128-NALT GSM289409.CEL  
127-NALT GSM289408.CEL  
126-Colon-d9 GSM1988105.CEL  
125-Colon-d9 GSM1988104.CEL  
124-Colon-d9 GSM1988103.CEL  
123-Colon-d4 GSM1988102.CEL  
122-Colon-d4 GSM1988101.CEL  
121-Intestine-large GSM258676.CEL  
120-Intestine-large GSM258675.CEL  
119-Intestine-small GSM258678.CEL  
118-Intestine-small GSM258692.CEL  
117-Lymph-nodes GSM258691.CEL  
116-Lymph-nodes GSM258726.CEL  
115-Spleen GSM258767.CEL  
114-Spleen GSM258767.CEL  
113-Neuro2a GSM258728.CEL  
112-Neuro2a GSM258727.CEL  
111-Astrocytes GSM241898.CEL  
110-ming GSM258726.CEL  
109-ming GSM258725.CEL  
108-MIMCD3 GSM258724.CEL  
107-MIMCD3 GSM258723.CEL  
106-Bruce4 GSM258656.CEL  
105-Bruce4 GSM258656.CEL  
104-C2C12 GSM258690.CEL  
103-C2C12 GSM258629.CEL  
102-NH3T3 GSM258739.CEL  
101-NH3T3 GSM258739.CEL  
100-3T3-L1 GSM258610.CEL  
99-3T3-L1 GSM258609.CEL  
98-10T12 GSM258631.CEL  
97-10T12 GSM258631.CEL  
96-Osteoblast-d21 GSM258740.CEL  
95-Osteoblast-d21 GSM258739.CEL  
94-Osteoblast-d14 GSM258738.CEL  
93-Osteoblast-d14 GSM258737.CEL  
92-Osteoblast-d5 GSM258742.CEL  
91-Osteoblast-d5 GSM258741.CEL  
90-Chondrocytes GSM266741.CEL  
89-Chondrocytes GSM266740.CEL  
88-Nat Helper cell GSM465594.CEL  
87-Nat Helper cell GSM465593.CEL  
86-TT cell GSM465596.CEL  
85-MS-1 GSM234692.CEL  
84-Lymph-endo-cells GSM143704.CEL  
83-PP-FDC GSM481977.CEL  
82-PP-FDC GSM481978.CEL  
81-PP-FDC GSM481976.CEL  
80-LY-RMLNDCC003001.CEL  
79-LY-RMLNDCC003001.CEL  
78-Follicular-Bcells GSM258664.CEL  
77-Follicular-Bcells GSM258664.CEL  
76-MZ-Bcell GSM258627.CEL  
75-MZ-Bcell GSM258627.CEL  
74-BAF3 GSM258620.CEL  
73-BAF3 GSM258619.CEL  
72-Tregs GSM258778.CEL  
71-Tregs GSM258777.CEL  
70-T-cells-CD8+ GSM258776.CEL  
69-T-cells-CD8+ GSM258774.CEL  
68-T-cells-CD4+ GSM258773.CEL  
67-T-cells-CD4+ GSM258773.CEL  
66-Thymocyte-DN GSM465595.CEL  
65-Osteoclasts GSM258743.CEL  
64-Osteoclasts GSM258743.CEL  
63-Microglia GSM258721.CEL  
62-Microglia GSM258721.CEL  
61-PM-M-PS-7h GSM268706.CEL  
60-PM-M-PS-7h GSM268706.CEL  
59-PM-M-PS-6h GSM258702.CEL  
58-PM-M-PS-6h GSM258702.CEL  
57-BMM-LPS-6h GSM258699.CEL  
56-BMM-LPS-6h GSM258699.CEL  
55-BMM-LPS-6h GSM258699.CEL  
54-BMM-LPS-6h GSM258699.CEL  
53-Iasmacryoid-DC GSM258650.CEL  
52-Iasmacryoid-DC GSM258649.CEL  
51-CD8a-DC GSM258648.CEL  
50-CD8a-DC GSM258647.CEL  
49-CD8a+DC GSM258646.CEL  
48-CD8a+DC GSM258646.CEL  
47-NK-cells GSM258732.CEL  
46-NK-cells GSM258731.CEL  
45-Mast-cells-IgE+Ad GSM258718.CEL  
44-Mast-cells-IgE+Ad GSM258717.CEL  
43-Mast-cells-IgE GSM258714.CEL  
42-Mast-cells-IgE GSM258713.CEL  
41-Mast-cells GSM258712.CEL  
40-Granulocytes GSM258668.CEL  
39-Granulocytes GSM258667.CEL  
38-GMP GSM258666.CEL  
37-GMP GSM258666.CEL  
36-GMP GSM258666.CEL  
35-GMP GSM258642.CEL  
34-GMP GSM258642.CEL  
33-MEP GSM258720.CEL  
32-MEP GSM258720.CEL  
31-HESC GSM258770.CEL  
30-HESC GSM258770.CEL  
29-Bone marrow GSM258628.CEL  
28-Bone marrow GSM258627.CEL  
27-paneth-cells-GE GSM116358.CEL  
26-paneth-cells-GE GSM116357.CEL  
25-paneth-cells GSM116350.CEL  
24-paneth-cells GSM116350.CEL  
23-paneth-cells GSM318589.CEL  
22-paneth-cells GSM318589.CEL  
21-Colon-Crypt GSM480375.CEL  
20-Colon-Crypt GSM480374.CEL  
19-Colon-Vill GSM480363.CEL  
18-Colon-Vill GSM480362.CEL  
17-Colon-IEC-GE GSM349880.CEL  
16-Colon-IEC-GE GSM350375.CEL  
15-Ileum-IEC-TGF GSM350376.CEL  
14-Ileum-IEC GSM350371.CEL  
13-Small-intestine-epithelium RMINEP002001.CEL  
12-Small-intestine-epithelium RMINEP001001.CEL  
11-FAE-RMPYEP002001.CEL  
10-FAE-RMPYEP001001.CEL  
09-Ileum-IEC GSM190797.CEL  
08-Ileum-IEC GSM190796.CEL  
07-Ileum-IEC GSM190795.CEL  
06-CT-v-M-cells GSM190794.CEL  
05-CT-v-M-cells GSM190793.CEL  
04-PP-M-cells GSM190792.CEL  
03-PP-M-cells GSM190791.CEL  
02-PP-M-cells GSM190790.CEL  
01-PP-M-cells GSM190789.CEL



Cluster0284\_Phagocyte-related (7 nodes)

1,998  
1,892.9  
1,787.7  
1,682.6  
1,577.4  
1,472.2  
1,367.1  
1,261.9  
1,156.8  
1,051.6  
946.4  
841.3  
736.1  
631  
525.8  
420.6  
315.5  
210.3  
105.2  
0

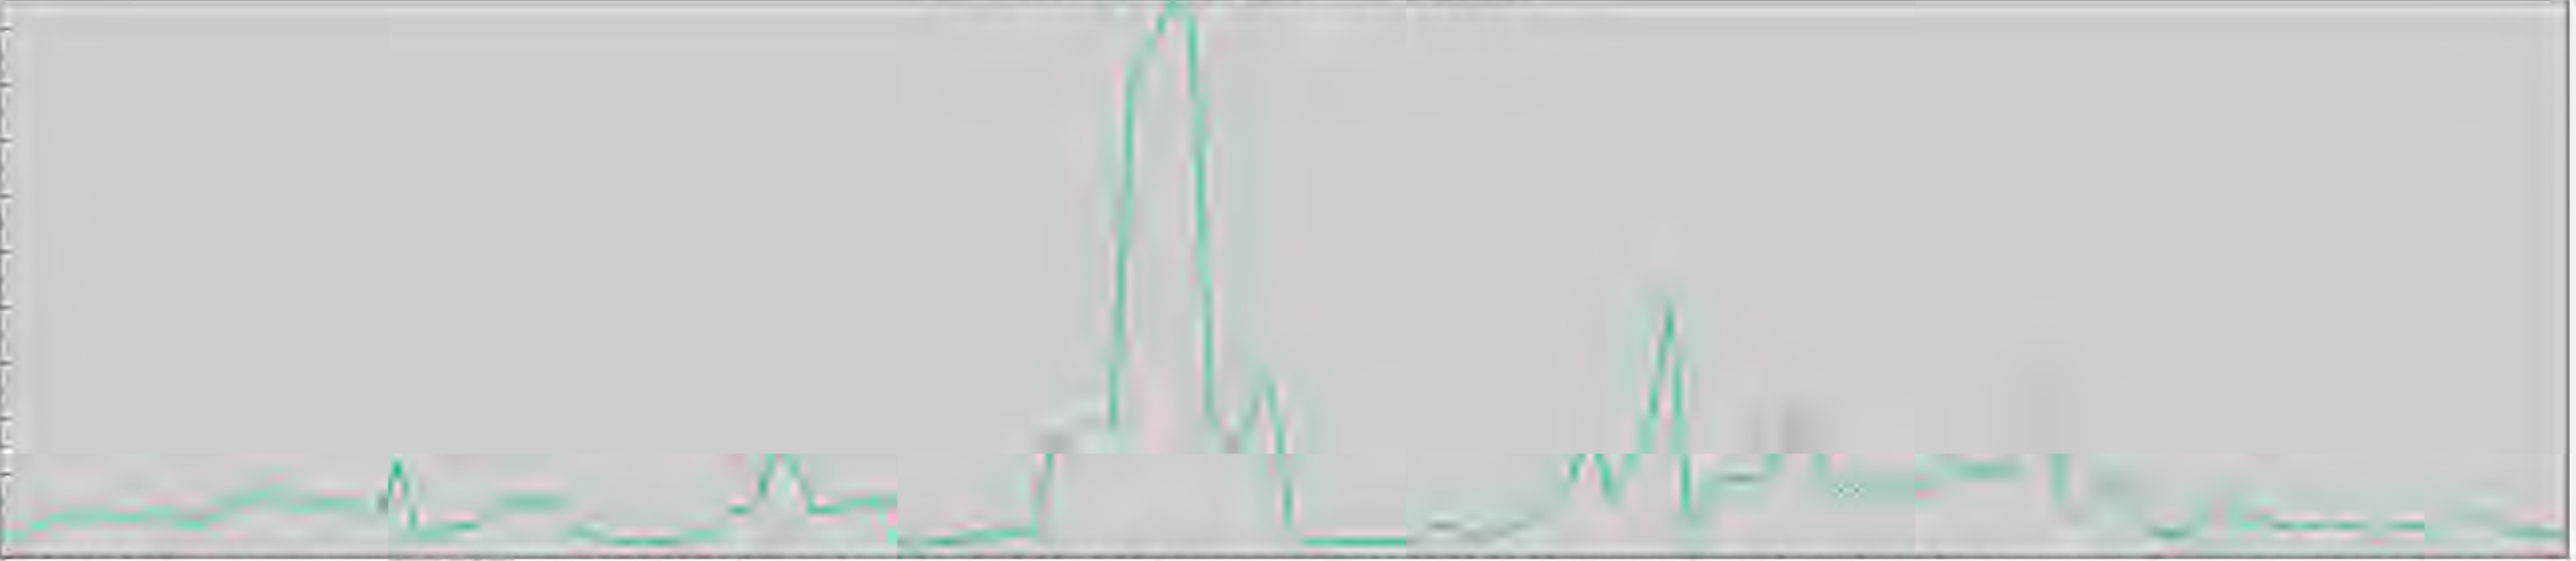

130- NALT GSM289411 CELL  
 129- NALT GSM289410 CELL  
 128- NALT GSM289409 CELL  
 127- NALT GSM289408 CELL  
 126- Colon-d9 GSM1988105 CELL  
 125- Colon-d9 GSM1988104 CELL  
 124- Colon-d9 GSM1988103 CELL  
 123- Colon-d4 GSM1988102 CELL  
 122- Colon-d4 GSM1988101 CELL  
 121- Intestine-large GSM258676 CELL  
 120- Intestine-large GSM258675 CELL  
 119- Intestine-small GSM258678 CELL  
 118- Intestine-small GSM258677 CELL  
 117- Lymph-nodes GSM258691 CELL  
 116- Lymph-nodes GSM258692 CELL  
 115- Spleen GSM258767 CELL  
 114- Spleen GSM258767 CELL  
 113- Neuro2a GSM258728 CELL  
 112- Neuro2a GSM258728 CELL  
 111- Astrocytes GSM241898 CELL  
 110- mimb GSM258726 CELL  
 109- mimb GSM258725 CELL  
 108- MIMCD3 GSM258724 CELL  
 107- MIMCD3 GSM258723 CELL  
 106- Bruce4 GSM258656 CELL  
 105- Bruce4 GSM258656 CELL  
 104- C2C12 GSM258690 CELL  
 103- C2C12 GSM258689 CELL  
 102- NIH3T3 GSM258730 CELL  
 101- NIH3T3 GSM258729 CELL  
 100- 3T3-L1 GSM258610 CELL  
 99- 3T3-L1 GSM258609 CELL  
 98- 10T1/2 GSM258632 CELL  
 97- 10T1/2 GSM258631 CELL  
 96- Osteoblast-d21 GSM258740 CELL  
 95- Osteoblast-d21 GSM258739 CELL  
 94- Osteoblast-d14 GSM258738 CELL  
 93- Osteoblast-d14 GSM258737 CELL  
 92- Osteoblast-d5 GSM258742 CELL  
 91- Osteoblast-d5 GSM258741 CELL  
 90- Chondrocytes GSM266741 CELL  
 89- Chondrocytes GSM266740 CELL  
 88- Nat Helper cell GSM465594 CELL  
 87- Nat Helper cell GSM465593 CELL  
 86- T cell GSM465596 CELL  
 85- MS-1 GSM234692 CELL  
 84- Lymph-endo-cells GSM143704 CELL  
 83- P-P-FDC GSM481977 CELL  
 82- P-P-FDC GSM481976 CELL  
 81- P-P-FDC GSM481976 CELL  
 80- F-L-Y RMLNDCC003001 CELL  
 79- F-L-Y RMLNDCC003001 CELL  
 78- Follicular-Bcells GSM258664 CELL  
 77- Follicular-Bcells GSM258663 CELL  
 76- MZ-Bcell GSM258627 CELL  
 75- MZ-Bcell GSM258627 CELL  
 74- BAF3 GSM258620 CELL  
 73- BAF3 GSM258619 CELL  
 72- Tregs GSM258778 CELL  
 71- Tregs GSM258777 CELL  
 70- T-cells-CD8+ GSM258776 CELL  
 69- T-cells-CD8+ GSM258774 CELL  
 68- T-cells-CD4+ GSM258773 CELL  
 67- T-cells-CD4+ GSM258744 CELL  
 66- Thymocyte-DN GSM465595 CELL  
 65- Osteoclasts GSM258743 CELL  
 64- Microglia GSM258721 CELL  
 63- Microglia GSM258721 CELL  
 62- PMM-7h GSM258706 CELL  
 61- PMM-7h GSM258706 CELL  
 60- PMM-LPS-7h GSM258702 CELL  
 59- PMM-LPS-6h GSM258701 CELL  
 58- PMM-LPS-6h GSM258700 CELL  
 57- BM-PS-6h GSM258699 CELL  
 56- BM-LPS-6h GSM258699 CELL  
 55- BM-LPS-6h GSM258699 CELL  
 54- BM-LPS-6h GSM258699 CELL  
 53- Plasmacytoid-DC GSM258650 CELL  
 52- CD8a-DC GSM258648 CELL  
 51- CD8a-DC GSM258647 CELL  
 50- CD8a-DC GSM258647 CELL  
 49- CD8a+DC GSM258646 CELL  
 48- CD8a+DC GSM258646 CELL  
 47- NK-cells GSM258732 CELL  
 46- NK-cells GSM258731 CELL  
 45- Mast-cells-IgE+Ad GSM258718 CELL  
 44- Mast-cells-IgE+Ad GSM258717 CELL  
 43- Mast-cells-IgE GSM258714 CELL  
 42- Mast-cells-IgE GSM258713 CELL  
 41- Mast-cells GSM258712 CELL  
 40- Granulocytes GSM258668 CELL  
 39- Granulocytes GSM258667 CELL  
 38- GMF GSM258666 CELL  
 37- GMF GSM258666 CELL  
 36- GMF GSM258666 CELL  
 35- CMP GSM258642 CELL  
 34- CMP GSM258641 CELL  
 33- MIEP GSM258720 CELL  
 32- MIEP GSM258719 CELL  
 31- HESC GSM258770 CELL  
 30- HESC GSM258769 CELL  
 29- Bone marrow GSM258628 CELL  
 28- Bone marrow GSM258627 CELL  
 27- Paneth-cells-GF-1 GSM116357 CELL  
 26- Paneth-cells-GF-1 GSM116357 CELL  
 25- Paneth-cells GSM116350 CELL  
 24- Paneth-cells GSM116350 CELL  
 23- Paneth-cells GSM318589 CELL  
 22- Paneth-cells GSM318589 CELL  
 21- Colon-Crypt GSM480375 CELL  
 20- Colon-Crypt GSM480374 CELL  
 19- Colon-Vill GSM480363 CELL  
 18- Colon-Vill GSM480362 CELL  
 17- Colon-IEC-GF GSM349880 CELL  
 16- Colon-IEC-GF GSM350375 CELL  
 15- Ileum-IEC-GF GSM350376 CELL  
 14- Ileum-IEC GSM350371 CELL  
 13- Small-intestine-epithelium RMINEP002001 CELL  
 12- Small-intestine-epithelium RMINEP001001 CELL  
 11- FAE-RMPYEP002001 CELL  
 10- FAE-RMPYEP001001 CELL  
 09- Ileum-IEC GSM190797 CELL  
 08- Ileum-IEC GSM190796 CELL  
 07- Ileum-IEC GSM190795 CELL  
 06- CT-v-M-cells GSM190794 CELL  
 05- CT-v-M-cells GSM190793 CELL  
 04- CT-v-M-cells GSM190792 CELL  
 03- PP-M-cells GSM190790 CELL  
 02- PP-M-cells GSM190789 CELL  
 01- PP-M-cells GSM190789 CELL



Cluster0285\_House keeping-cell cycle (7 nodes)

184.2  
174.5  
164.8  
155.1  
145.4  
135.7  
126  
116.3  
106.6  
96.9  
87.2  
77.6  
67.9  
58.2  
48.5  
38.8  
29.1  
19.4  
9.7  
0

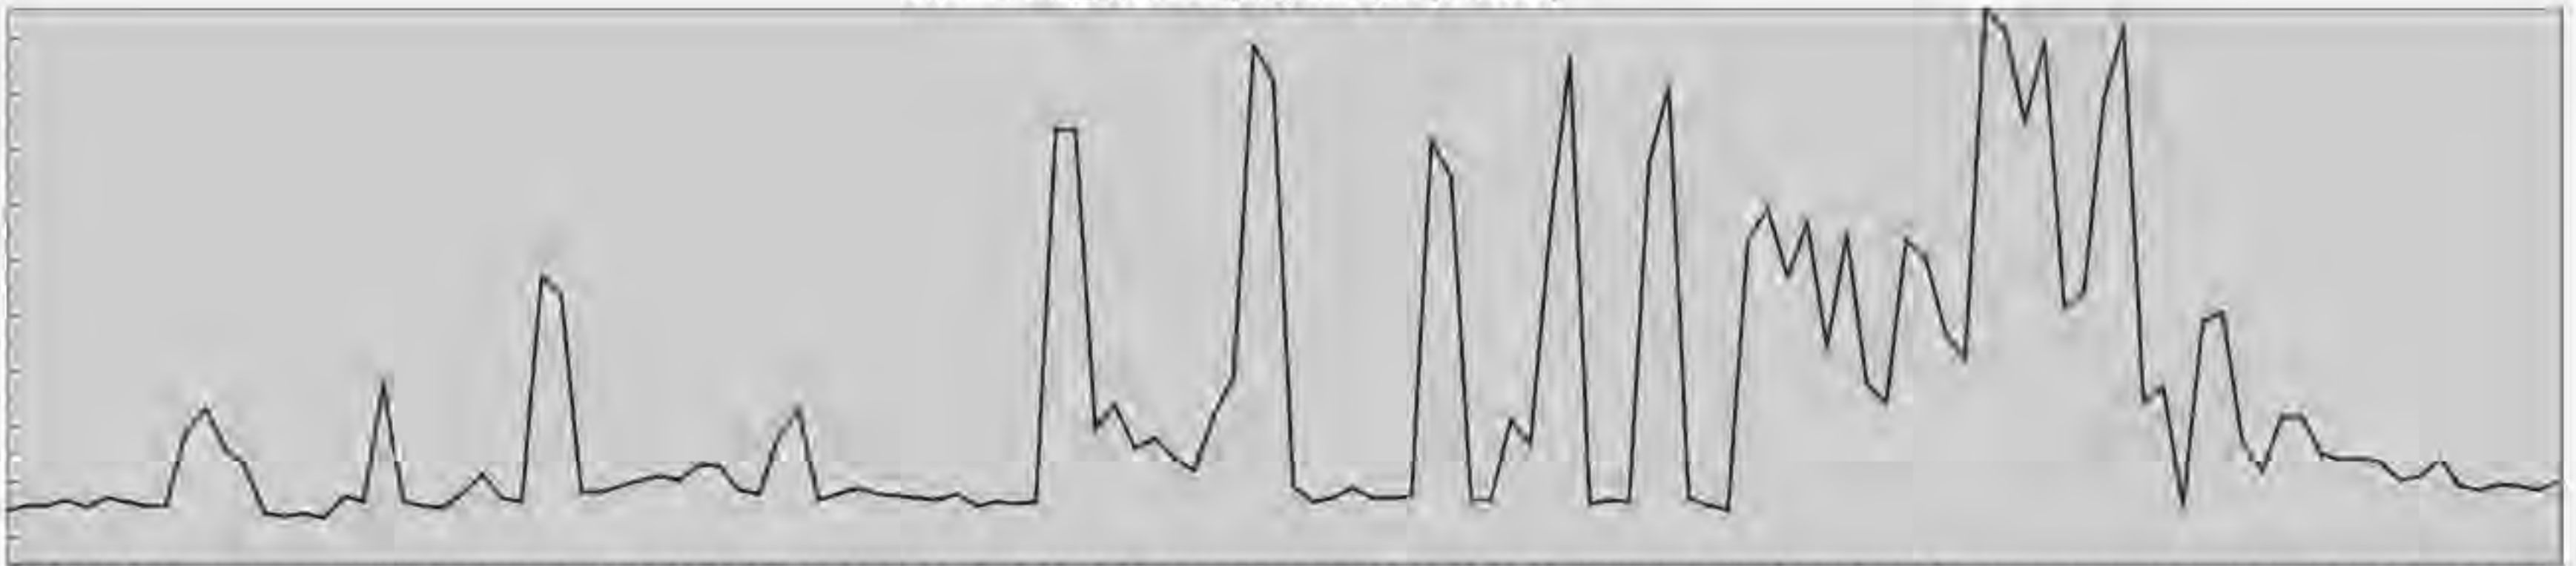

130-NALT GSM289411.CEL  
129-NALT GSM289410.CEL  
128-NALT GSM289409.CEL  
127-NALT GSM289408.CEL  
126-Column-d9 GSM1988105.CEL  
125-Column-d9 GSM1988104.CEL  
124-Column-d9 GSM1988103.CEL  
123-Column-d4 GSM1988102.CEL  
122-Column-d4 GSM1988101.CEL  
121-Intestine-large GSM258676.CEL  
120-Intestine-large GSM258675.CEL  
119-Intestine-small GSM258678.CEL  
118-Intestine-small GSM258692.CEL  
117-Lymph-nodes GSM258691.CEL  
116-Lymph-nodes GSM258726.CEL  
115-Spleen GSM258768.CEL  
114-Spleen GSM258767.CEL  
113-Neuro2a GSM258728.CEL  
112-Neuro2a GSM258727.CEL  
111-Astrocytes GSM241898.CEL  
110-mimb GSM258725.CEL  
109-mimb GSM258724.CEL  
108-MIMCD3 GSM258723.CEL  
107-MIMCD3 GSM258722.CEL  
106-Bruce4 GSM258656.CEL  
105-Bruce4 GSM258655.CEL  
104-C2C12 GSM258690.CEL  
103-C2C12 GSM258689.CEL  
102-NH3T3 GSM258730.CEL  
101-NH3T3 GSM258729.CEL  
100-3T3-L1 GSM258610.CEL  
99-3T3-L1 GSM258609.CEL  
98-10T12 GSM258632.CEL  
97-10T12 GSM258631.CEL  
96-Osteoblast-d21 GSM258740.CEL  
95-Osteoblast-d21 GSM258739.CEL  
94-Osteoblast-d14 GSM258738.CEL  
93-Osteoblast-d14 GSM258737.CEL  
92-Osteoblast-d5 GSM258742.CEL  
91-Osteoblast-d5 GSM258741.CEL  
90-Chondrocytes GSM266741.CEL  
89-Chondrocytes GSM266740.CEL  
88-Nat Helper cell GSM465594.CEL  
87-Nat Helper cell GSM465593.CEL  
86-TT cell GSM465596.CEL  
85-MS-1 GSM234692.CEL  
84-Lymph-endo-cells GSM143704.CEL  
83-PP-FDC GSM481977.CEL  
82-PP-FDC GSM481978.CEL  
81-PP-FDC GSM481976.CEL  
80-L Y RMLNDCC003001.CEL  
79-L Y RMLNDCC003001.CEL  
78-Follicular-Bcells GSM258664.CEL  
77-Follicular-Bcells GSM258663.CEL  
76-MZ-Bcell GSM258627.CEL  
75-MZ-Bcell GSM258621.CEL  
74-BAF3 GSM258620.CEL  
73-BAF3 GSM258619.CEL  
72-Tregs GSM258778.CEL  
71-Tregs GSM258777.CEL  
70-T-cells-CD8+ GSM258776.CEL  
69-T-cells-CD8+ GSM258775.CEL  
68-T-cells-CD4+ GSM258774.CEL  
67-T-cells-CD4+ GSM258773.CEL  
66-Thymocyte-DN GSM465595.CEL  
65-Osteoclasts GSM258744.CEL  
64-Microglia GSM258727.CEL  
63-Microglia GSM258721.CEL  
62-MM-LPS-7h GSM258706.CEL  
61-MM-LPS-7h GSM258705.CEL  
60-MM-LPS-6h GSM258702.CEL  
59-MM-LPS-6h GSM258701.CEL  
58-MM-LPS-6h GSM258699.CEL  
57-MM-LPS-6h GSM258699.CEL  
56-MM-LPS-6h GSM258694.CEL  
55-Plasmacytoid-DC GSM258650.CEL  
54-Plasmacytoid-DC GSM258649.CEL  
53-CD8a-DC GSM258647.CEL  
52-CD8a-DC GSM258647.CEL  
51-CD8a+DC GSM258646.CEL  
50-CD8a+DC GSM258646.CEL  
49-NK-cells GSM258732.CEL  
48-NK-cells GSM258731.CEL  
47-NK-cells GSM258731.CEL  
46-Mast-cells-IgE+Ad GSM258719.CEL  
45-Mast-cells-IgE+Ad GSM258718.CEL  
44-Mast-cells-IgE GSM258714.CEL  
43-Mast-cells-IgE GSM258713.CEL  
42-Mast-cells-IgE GSM258712.CEL  
41-Mast-cells-IgE GSM258711.CEL  
40-Granulocytes GSM258667.CEL  
39-Granulocytes GSM258666.CEL  
38-GMP GSM258666.CEL  
37-GMP GSM258666.CEL  
36-GMP GSM258666.CEL  
35-GMP GSM258666.CEL  
34-MEP GSM2588720.CEL  
33-MEP GSM2588720.CEL  
32-MEP GSM2588720.CEL  
31-HSC GSM2588770.CEL  
30-HSC GSM2588770.CEL  
29-Bone marrow GSM2588628.CEL  
28-Bone marrow GSM2588627.CEL  
27-paneth-cells-GF-1 GSM116358.CEL  
26-paneth-cells-GF-1 GSM116357.CEL  
25-paneth-cells GSM116350.CEL  
24-paneth-cells GSM116359.CEL  
23-paneth-cells GSM318589.CEL  
22-paneth-cells GSM318590.CEL  
21-Column-Crypt GSM480375.CEL  
20-Column-Crypt GSM480374.CEL  
19-Column-Vill GSM480363.CEL  
18-Column-Vill GSM480362.CEL  
17-Column-IEC-GF GSM349880.CEL  
16-Column-IEC-GF GSM350375.CEL  
15-Ileum-IEC GSM350376.CEL  
14-Ileum-IEC GSM350371.CEL  
13-Small-intestine-epithelium RMINEP002901.CEL  
12-Small-intestine-epithelium RMINEP001001.CEL  
11-FAE-RMPYEP002001.CEL  
10-FAE-RMPYEP001001.CEL  
09-Ileum-IEC GSM190797.CEL  
08-Ileum-IEC GSM190796.CEL  
07-Ileum-IEC GSM190795.CEL  
06-CT-v-M-cells GSM190794.CEL  
05-CT-v-M-cells GSM190793.CEL  
04-PP-M-cells GSM190792.CEL  
03-PP-M-cells GSM190791.CEL  
02-PP-M-cells GSM190790.CEL  
01-PP-M-cells GSM190789.CEL







Cluster0287\_House keeping (7 nodes)

4,329.8  
4,101.9  
3,874  
3,646.2  
3,418.3  
3,190.4  
2,962.5  
2,734.6  
2,506.7  
2,278.9  
2,051  
1,823.1  
1,595.2  
1,367.3  
1,139.4  
911.5  
683.7  
455.8  
227.9  
0

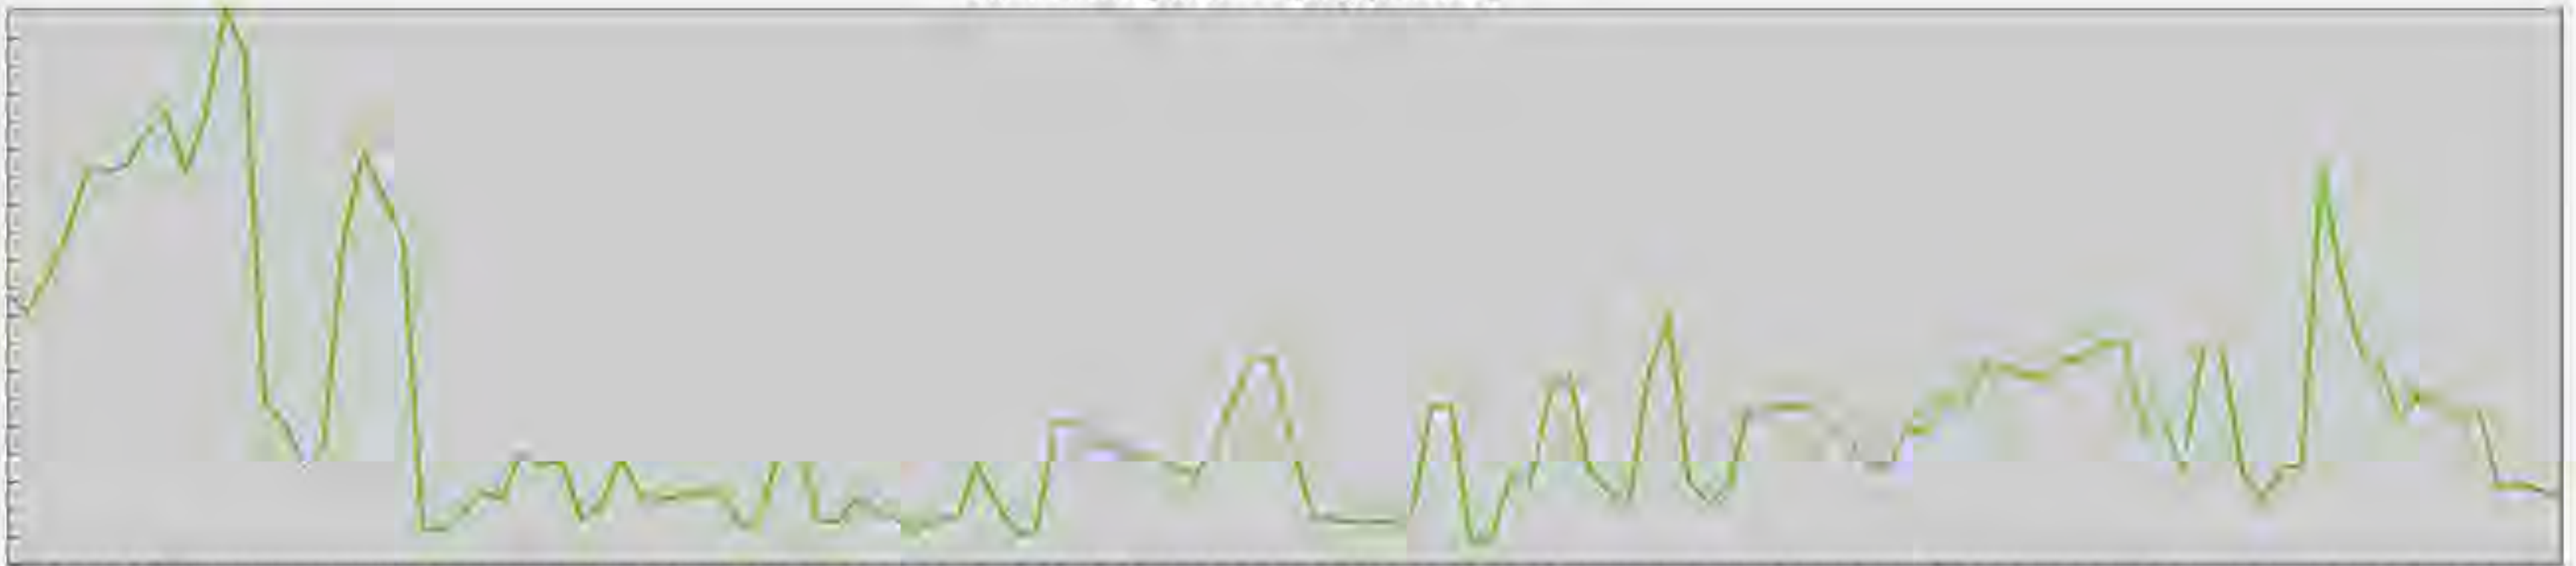

130-NALT GSM289411.CEL  
129-NALT GSM289410.CEL  
128-NALT GSM289409.CEL  
127-NALT GSM289408.CEL  
126-Column-d9 GSM1988105.CEL  
125-Column-d9 GSM1988104.CEL  
124-Column-d9 GSM1988103.CEL  
123-Column-d4 GSM1988102.CEL  
122-Column-d4 GSM1988101.CEL  
121-Intestine-large GSM258676.CEL  
120-Intestine-large GSM258675.CEL  
119-Intestine-small GSM258678.CEL  
118-Intestine-small GSM258692.CEL  
117-Lymph-nodes GSM258691.CEL  
116-Lymph-nodes GSM258726.CEL  
115-Spleen GSM258768.CEL  
114-Spleen GSM258767.CEL  
113-Neuro2a GSM258728.CEL  
112-Neuro2a GSM258727.CEL  
111-Astrocytes GSM241898.CEL  
110-mim6 GSM258725.CEL  
109-mim6 GSM258724.CEL  
108-MIMCD3 GSM258723.CEL  
107-MIMCD3 GSM258656.CEL  
106-Bruce4 GSM258655.CEL  
105-Bruce4 GSM258656.CEL  
104-C2C12 GSM258690.CEL  
103-C2C12 GSM258629.CEL  
102-NH3T3 GSM258730.CEL  
101-NH3T3 GSM258729.CEL  
100-3T3-L1 GSM258610.CEL  
99-3T3-L1 GSM258609.CEL  
98-10T12 GSM258632.CEL  
97-10T12 GSM258631.CEL  
96-Osteoblast-d21 GSM258740.CEL  
95-Osteoblast-d21 GSM258739.CEL  
94-Osteoblast-d14 GSM258738.CEL  
93-Osteoblast-d14 GSM258737.CEL  
92-Osteoblast-d5 GSM258742.CEL  
91-Osteoblast-d5 GSM258741.CEL  
90-Chondrocytes GSM266741.CEL  
89-Chondrocytes GSM266740.CEL  
88-Nat Helper cell GSM465594.CEL  
87-Nat Helper cell GSM465593.CEL  
86-LT cell GSM465596.CEL  
85-MS-1 GSM234692.CEL  
84-Lymph-endo-cells GSM143704.CEL  
83-PP-FDC GSM481977.CEL  
82-PP-FDC GSM481978.CEL  
81-PP-FDC GSM481976.CEL  
80-FLY RMLNDCC003001.CEL  
79-FLY RMLNDCC003001.CEL  
78-Follicular-Bcells GSM258664.CEL  
77-Follicular-Bcells GSM258663.CEL  
76-MZ-Bcell GSM258622.CEL  
75-MZ-Bcell GSM258621.CEL  
74-BAF3 GSM258620.CEL  
73-BAF3 GSM258619.CEL  
72-Tregs GSM258778.CEL  
71-Tregs GSM258777.CEL  
70-T-cells-CD8+ GSM258776.CEL  
69-T-cells-CD8+ GSM258775.CEL  
68-T-cells-CD4+ GSM258774.CEL  
67-T-cells-CD4+ GSM258773.CEL  
66-Thymocyte-DN GSM465595.CEL  
65-Osteoclasts GSM258744.CEL  
64-Microglia GSM258721.CEL  
63-Microglia GSM258721.CEL  
62-PM-M-7h GSM258706.CEL  
61-PM-M-7h GSM258705.CEL  
60-PM-M-LPS-7h GSM258702.CEL  
59-PM-M-LPS-7h GSM258701.CEL  
58-BMM-LPS-6h GSM258700.CEL  
57-BMM-LPS-6h GSM258699.CEL  
56-BMM-LPS-6h GSM258699.CEL  
55-BMM-LPS-6h GSM258694.CEL  
54-BMM-LPS-6h GSM258694.CEL  
53-Plasmacytoid-DC GSM258650.CEL  
52-Plasmacytoid-DC GSM258649.CEL  
51-CD8a-DC GSM258648.CEL  
50-CD8a-DC GSM258647.CEL  
49-CD8a+DC GSM258646.CEL  
48-CD8a+DC GSM258645.CEL  
47-NK-cells GSM258732.CEL  
46-NK-cells GSM258731.CEL  
45-Mast-cells-IgE+Ad GSM258718.CEL  
44-Mast-cells-IgE+Ad GSM258717.CEL  
43-Mast-cells-IgE GSM258714.CEL  
42-Mast-cells-IgE GSM258713.CEL  
41-Mast-cells GSM258712.CEL  
40-Granulocytes GSM258668.CEL  
39-Granulocytes GSM258667.CEL  
38-GMP GSM258666.CEL  
37-GMP GSM258665.CEL  
36-GMP GSM258665.CEL  
35-GMP GSM258642.CEL  
34-GMP GSM258641.CEL  
33-MEP GSM258720.CEL  
32-MEP GSM258719.CEL  
31-HSC GSM258770.CEL  
30-HSC GSM258769.CEL  
29-Bone marrow GSM258628.CEL  
28-Bone marrow GSM258627.CEL  
27-Paneth-cells-GF GSM116358.CEL  
26-Paneth-cells-GF-1 GSM116357.CEL  
25-Paneth-cells GSM116350.CEL  
24-Paneth-cells GSM116359.CEL  
23-Paneth-cells GSM318589.CEL  
22-Paneth-cells GSM318590.CEL  
21-Column-Crypt GSM480375.CEL  
20-Column-Crypt GSM480374.CEL  
19-Column-Vill GSM480363.CEL  
18-Column-Vill GSM480362.CEL  
17-Column-IEC-GF GSM349880.CEL  
16-Column-IEC-GF GSM350375.CEL  
15-Ileum-IEC GSM350376.CEL  
14-Ileum-IEC GSM350371.CEL  
13-Small-intestine-epithelium RMINEP002001.CEL  
12-Small-intestine-epithelium RMINEP001001.CEL  
11-FAE-RMPYEP001001.CEL  
10-FAE-RMPYEP001001.CEL  
09-Ileum-IEC GSM190797.CEL  
08-Ileum-IEC GSM190796.CEL  
07-Ileum-IEC GSM190795.CEL  
06-CT-v-M-cells GSM190794.CEL  
05-CT-v-M-cells GSM190793.CEL  
04-CT-v-M-cells GSM190792.CEL  
03-PP-M-cells GSM190791.CEL  
02-PP-M-cells GSM190790.CEL  
01-PP-M-cells GSM190789.CEL



Cluster0288\_Uncertain-low in many (7 nodes)

148.9  
141.1  
133.3  
125.4  
117.6  
109.7  
101.9  
94.1  
86.2  
78.4  
70.6  
62.7  
54.9  
47  
39.2  
31.4  
23.5  
15.7  
7.8  
0

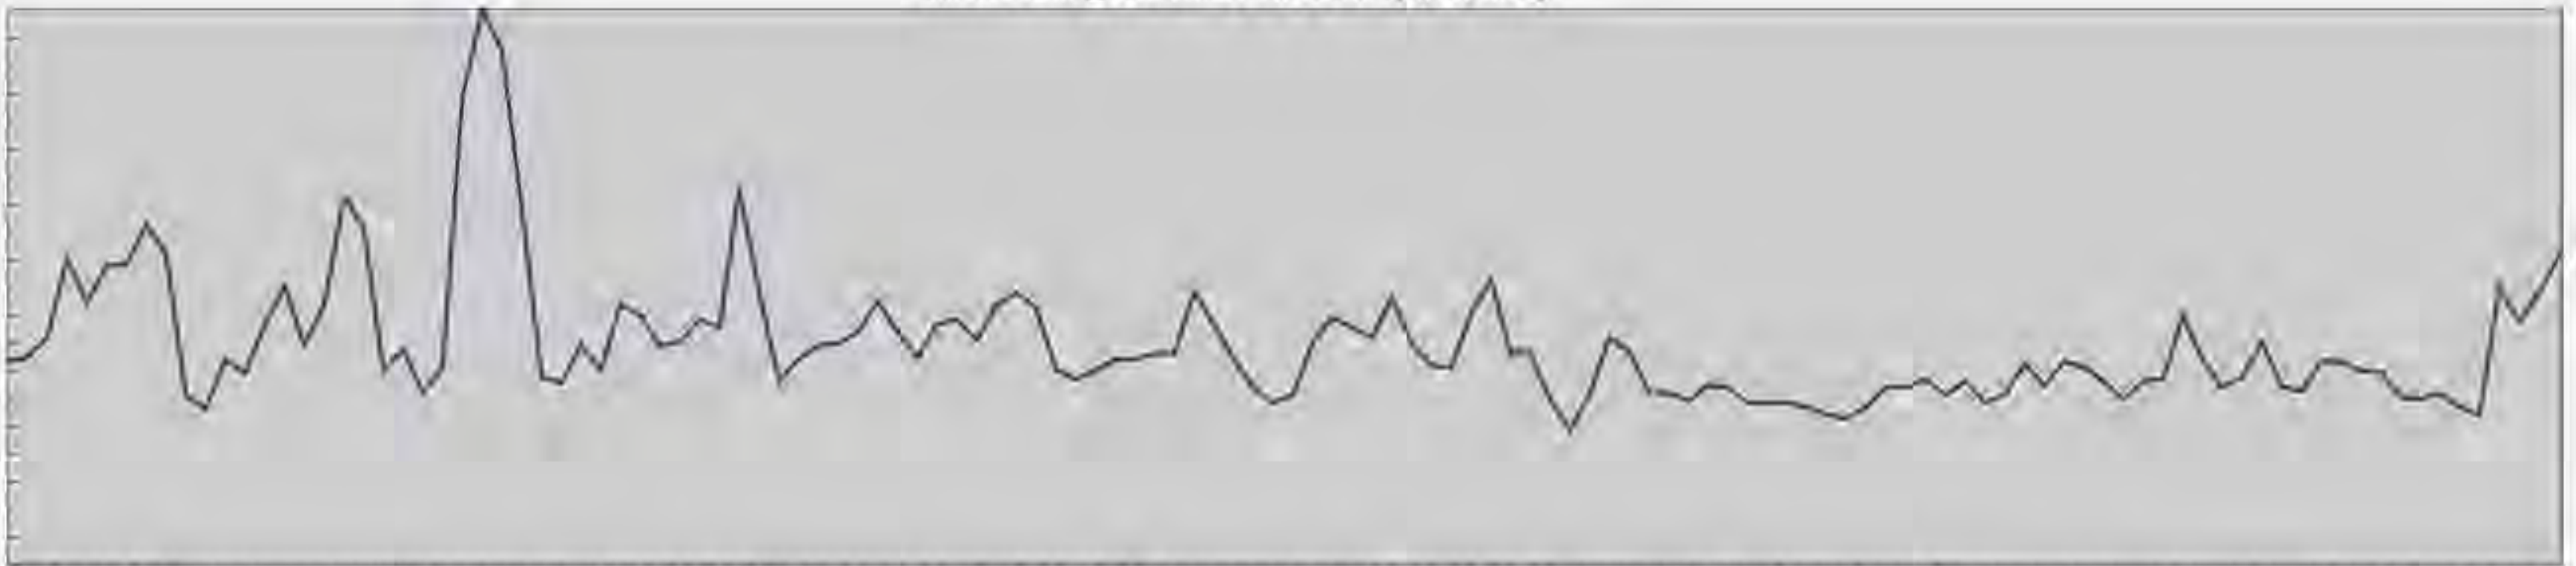

130-NALT GSM289411.CEL  
129-NALT GSM289410.CEL  
128-NALT GSM289409.CEL  
127-NALT GSM289408.CEL  
126-Colon-d9 GSM1988105.CEL  
125-Colon-d9 GSM1988104.CEL  
124-Colon-d9 GSM1988103.CEL  
123-Colon-d4 GSM1988102.CEL  
122-Colon-d4 GSM1988101.CEL  
121-Intestine-large GSM258676.CEL  
120-Intestine-large GSM258675.CEL  
119-Intestine-small GSM258678.CEL  
118-Intestine-small GSM258692.CEL  
117-Lymph-nodes GSM258691.CEL  
116-Lymph-nodes GSM258726.CEL  
115-Spleen GSM258767.CEL  
114-Spleen GSM258767.CEL  
113-Neuro2a GSM258728.CEL  
112-Neuro2a GSM258727.CEL  
111-Astrocytes GSM241898.CEL  
110-ming GSM258726.CEL  
109-ming GSM258725.CEL  
108-MIMCD3 GSM258724.CEL  
107-MIMCD3 GSM258723.CEL  
106-Bruce4 GSM258656.CEL  
105-Bruce4 GSM258656.CEL  
104-C2C12 GSM258690.CEL  
103-C2C12 GSM258629.CEL  
102-NH3T3 GSM258739.CEL  
101-NH3T3 GSM258739.CEL  
100-3T3-L1 GSM258610.CEL  
99-3T3-L1 GSM258609.CEL  
98-10T12 GSM258632.CEL  
97-10T12 GSM258631.CEL  
96-Osteoblast-d21 GSM258740.CEL  
95-Osteoblast-d21 GSM258739.CEL  
94-Osteoblast-d14 GSM258738.CEL  
93-Osteoblast-d14 GSM258737.CEL  
92-Osteoblast-d5 GSM258742.CEL  
91-Osteoblast-d5 GSM258741.CEL  
90-Chondrocytes GSM266741.CEL  
89-Chondrocytes GSM266740.CEL  
88-Nat Helper cell GSM465594.CEL  
87-Nat Helper cell GSM465593.CEL  
86-LT cell GSM465596.CEL  
85-MS-1 GSM234692.CEL  
84-Lymph-endo-cells GSM143704.CEL  
83-PP-FDC GSM481977.CEL  
82-PP-FDC GSM481978.CEL  
81-PP-FDC GSM481976.CEL  
80-LY RMLNDCC003001.CEL  
79-LY RMLNDCC003001.CEL  
78-Follicular-Bcells GSM258664.CEL  
77-Follicular-Bcells GSM258663.CEL  
76-MZ-Bcell GSM258627.CEL  
75-MZ-Bcell GSM258627.CEL  
74-BAF3 GSM258620.CEL  
73-BAF3 GSM258619.CEL  
72-Tregs GSM258778.CEL  
71-Tregs GSM258777.CEL  
70-T-cells-CD8+ GSM258776.CEL  
69-T-cells-CD8+ GSM258774.CEL  
68-T-cells-CD4+ GSM258773.CEL  
67-T-cells-CD4+ GSM258773.CEL  
66-Thymocyte-DN GSM465595.CEL  
65-Osteoclasts GSM258744.CEL  
64-Microglia GSM258721.CEL  
63-Microglia GSM258721.CEL  
62-MM-LPS-7h GSM268706.CEL  
61-MM-LPS-7h GSM268706.CEL  
60-MM-LPS-7h GSM268705.CEL  
59-MM-LPS-6h GSM258702.CEL  
58-MM-LPS-6h GSM258702.CEL  
57-MM-LPS-6h GSM258700.CEL  
56-MM-LPS-6h GSM258699.CEL  
55-MM-LPS-6h GSM258699.CEL  
54-BM258694.CEL  
53-BM258694.CEL  
52-Plasmacytoid-DC GSM258650.CEL  
51-CD8a-DC GSM258649.CEL  
50-CD8a-DC GSM258647.CEL  
49-CD8a+DC GSM258646.CEL  
48-CD8a+DC GSM258646.CEL  
47-NK-cells GSM258732.CEL  
46-NK-cells GSM258732.CEL  
45-Mast-cells-IgE+Ad GSM258718.CEL  
44-Mast-cells-IgE+Ad GSM258717.CEL  
43-Mast-cells-IgE GSM258714.CEL  
42-Mast-cells-IgE GSM258713.CEL  
41-Mast-cells GSM258712.CEL  
40-Granulocytes GSM258711.CEL  
39-Granulocytes GSM258668.CEL  
38-MP GSM258666.CEL  
37-MP GSM258666.CEL  
36-MP GSM258666.CEL  
35-MP GSM258642.CEL  
34-MEP GSM258642.CEL  
33-MEP GSM258720.CEL  
32-MEP GSM258720.CEL  
31-HSC GSM258770.CEL  
30-HSC GSM258770.CEL  
29-Bone marrow GSM258628.CEL  
28-Bone marrow GSM258627.CEL  
27-Paneth-cells-GE GSM116358.CEL  
26-Paneth-cells-GE GSM116357.CEL  
25-Paneth-cells GSM116350.CEL  
24-Paneth-cells GSM116359.CEL  
23-Paneth-cells GSM318589.CEL  
22-Paneth-cells GSM318590.CEL  
21-Colon-Crypt GSM480375.CEL  
20-Colon-Crypt GSM480374.CEL  
19-Colon-Vill GSM480363.CEL  
18-Colon-Vill GSM480362.CEL  
17-Colon-IEC-GE GSM349880.CEL  
16-Colon-IEC-GE GSM350375.CEL  
15-Ileum-IEC-TGF GSM350376.CEL  
14-Ileum-IEC GSM350371.CEL  
13-Small-intestine-epithelium RMINEP002001.CEL  
12-Small-intestine-epithelium RMINEP001001.CEL  
11-FAE-RMPYEP002001.CEL  
10-FAE-RMPYEP001001.CEL  
09-Ileum-IEC GSM190797.CEL  
08-Ileum-IEC GSM190796.CEL  
07-Ileum-IEC GSM190795.CEL  
06-CT-w-M-cells GSM190794.CEL  
05-CT-w-M-cells GSM190793.CEL  
04-CT-v-M-cells GSM190792.CEL  
03-PP-M-cells GSM190791.CEL  
02-PP-M-cells GSM190790.CEL  
01-PP-M-cells GSM190789.CEL



Cluster0289\_House keeping (7 nodes)

506.5  
479.9  
453.2  
426.5  
399.9  
373.2  
346.6  
319.9  
293.2  
266.6  
239.9  
213.3  
186.6  
160  
133.3  
106.6  
80  
53.3  
26.7  
0

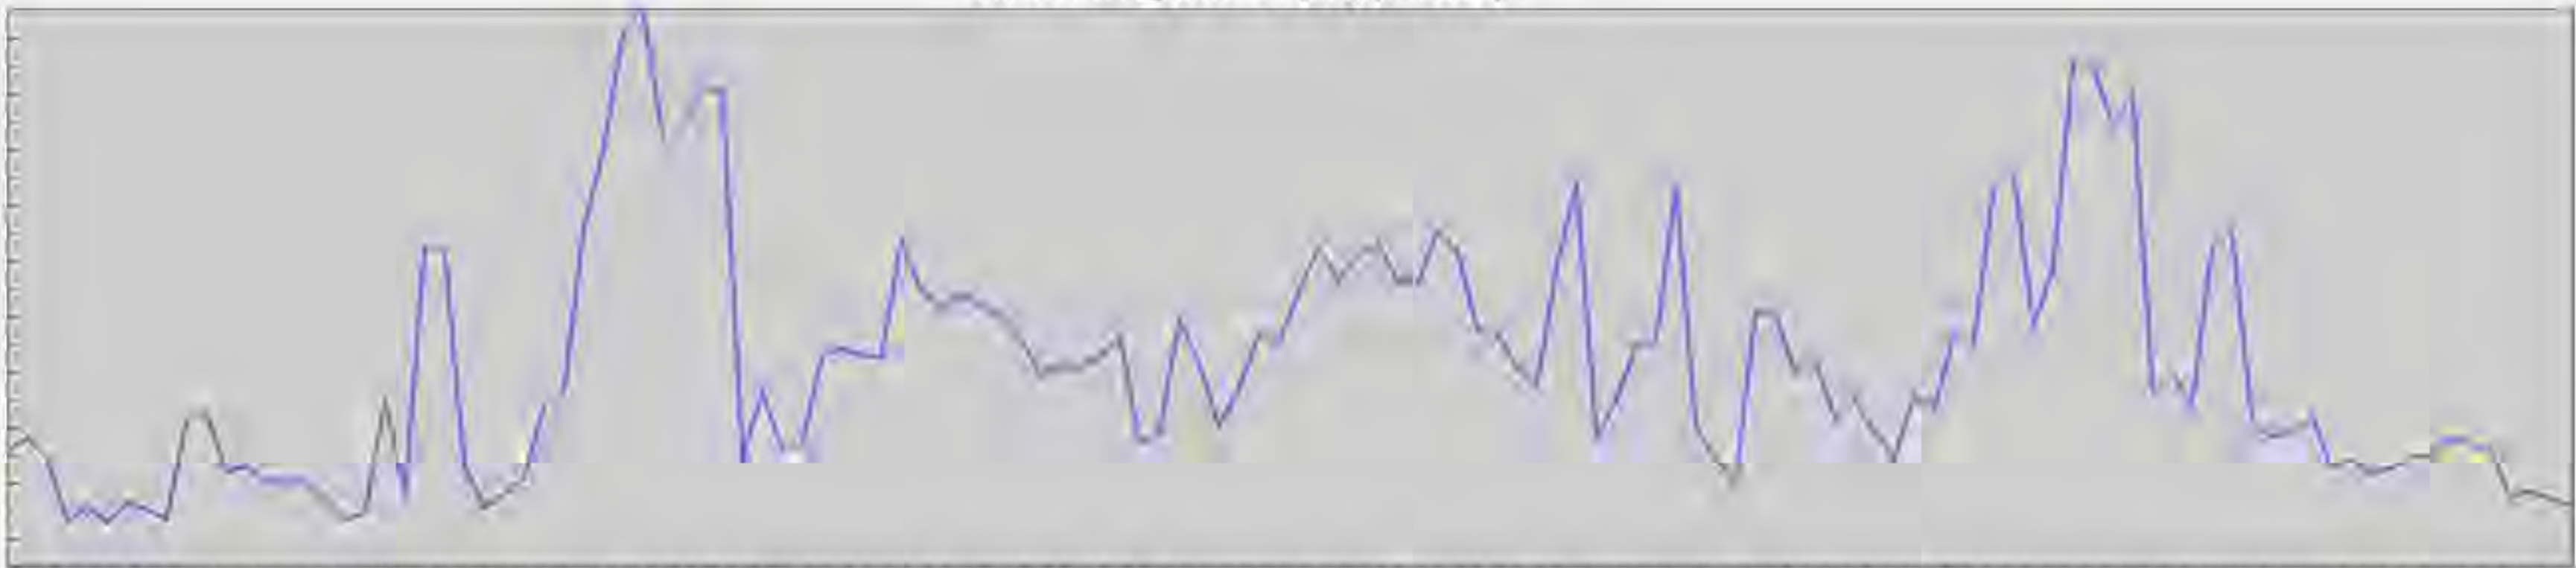

130-NALT-GSM289411.CEL  
129-NALT-GSM289410.CEL  
128-NALT-GSM289409.CEL  
127-NALT-GSM289408.CEL  
126-Colon-d9-GSM1988105.CEL  
125-Colon-d9-GSM1988104.CEL  
124-Colon-d9-GSM1988103.CEL  
123-Colon-d4-GSM1988102.CEL  
122-Colon-d4-GSM1988101.CEL  
121-Intestine-large-GSM258676.CEL  
120-Intestine-large-GSM258675.CEL  
119-Intestine-small-GSM258678.CEL  
118-Intestine-small-GSM258692.CEL  
117-Lymph-nodes-GSM258691.CEL  
116-Lymph-nodes-GSM258726.CEL  
115-Spleen-GSM258767.CEL  
114-Spleen-GSM258767.CEL  
113-Neuro2a-GSM258728.CEL  
112-Neuro2a-GSM241898.CEL  
111-Astrocytes-GSM241898.CEL  
110-mim6-GSM258725.CEL  
109-mim6-GSM258725.CEL  
108-MIMCD3-GSM258724.CEL  
107-MIMCD3-GSM258723.CEL  
106-Bruce4-GSM258656.CEL  
105-Bruce4-GSM258656.CEL  
104-C2C12-GSM258690.CEL  
103-C2C12-GSM258629.CEL  
102-NH3T3-GSM258739.CEL  
101-NH3T3-GSM258739.CEL  
100-3T3-L1-GSM258610.CEL  
99-3T3-L1-GSM258609.CEL  
98-10T12-GSM258631.CEL  
97-10T12-GSM258631.CEL  
96-Osteoblast-d21-GSM258740.CEL  
95-Osteoblast-d21-GSM258739.CEL  
94-Osteoblast-d14-GSM258738.CEL  
93-Osteoblast-d14-GSM258737.CEL  
92-Osteoblast-d5-GSM258742.CEL  
91-Osteoblast-d5-GSM258741.CEL  
90-Chondrocytes-GSM266741.CEL  
89-Chondrocytes-GSM266740.CEL  
88-Nat Helper cell-GSM465594.CEL  
87-Nat Helper cell-GSM465593.CEL  
86-LT cell-GSM465596.CEL  
85-MS-1-GSM234692.CEL  
84-Lymph-endo-cells-GSM143704.CEL  
83-PP-FDC-GSM481977.CEL  
82-PP-FDC-GSM481978.CEL  
81-PP-FDC-GSM481976.CEL  
80-F-LY-RMLNDCC003001.CEL  
79-F-LY-RMLNDCC003001.CEL  
78-Follicular-Bcells-GSM258664.CEL  
77-Follicular-Bcells-GSM258663.CEL  
76-MZ-Bcell-GSM258622.CEL  
75-MZ-Bcell-GSM258621.CEL  
74-BAF3-GSM258620.CEL  
73-BAF3-GSM258619.CEL  
72-Tregs-GSM258778.CEL  
71-Tregs-GSM258777.CEL  
70-T-cells-CD8+-GSM258776.CEL  
69-T-cells-CD8+-GSM258775.CEL  
68-T-cells-CD4+-GSM258774.CEL  
67-T-cells-CD4+-GSM258773.CEL  
66-Thymocyte-DN-GSM465595.CEL  
65-Osteoclasts-GSM258744.CEL  
64-Microglia-GSM258721.CEL  
63-Microglia-GSM258721.CEL  
62-MM-LPS-7h-GSM258706.CEL  
61-MM-LPS-7h-GSM258706.CEL  
60-MM-LPS-7h-GSM258705.CEL  
59-MM-LPS-6h-GSM258702.CEL  
58-MM-LPS-6h-GSM258702.CEL  
57-MM-LPS-6h-GSM258700.CEL  
56-MM-LPS-6h-GSM258699.CEL  
55-MM-LPS-6h-GSM258699.CEL  
54-BM1-GSM258694.CEL  
53-BM1-GSM258694.CEL  
52-Plasmacytoid-DC-GSM258650.CEL  
51-CD8a-DC-GSM258648.CEL  
50-CD8a-DC-GSM258647.CEL  
49-CD8a+DC-GSM258646.CEL  
48-CD8a+DC-GSM258645.CEL  
47-NK-cells-GSM258732.CEL  
46-NK-cells-GSM258732.CEL  
45-Mast-cells-IgE+Ad-GSM258718.CEL  
44-Mast-cells-IgE+Ad-GSM258717.CEL  
43-Mast-cells-IgE-GSM258714.CEL  
42-Mast-cells-IgE-GSM258713.CEL  
41-Mast-cells-GSM258712.CEL  
40-Granulocytes-GSM258668.CEL  
39-Granulocytes-GSM258667.CEL  
38-GMP-GSM258666.CEL  
37-GMP-GSM258666.CEL  
36-GMP-GSM258665.CEL  
35-GMP-GSM258642.CEL  
34-MEP-GSM2588720.CEL  
33-MEP-GSM2588720.CEL  
32-MEP-GSM258770.CEL  
31-HSC-GSM258770.CEL  
30-Bone marrow-GSM258628.CEL  
29-Bone marrow-GSM258627.CEL  
28-Paneth-cells-GF-GSM116358.CEL  
27-Paneth-cells-GF-GSM116357.CEL  
26-Paneth-cells-GF-GSM116350.CEL  
25-Paneth-cells-GSM116350.CEL  
24-Paneth-cells-GSM116359.CEL  
23-Paneth-cells-GSM318589.CEL  
22-Paneth-cells-GSM318590.CEL  
21-Colon-Crypt-GSM480375.CEL  
20-Colon-Crypt-GSM480374.CEL  
19-Colon-Vill-GSM480363.CEL  
18-Colon-Vill-GSM480362.CEL  
17-Colon-IEC-GF-GSM349880.CEL  
16-Colon-IEC-GF-GSM350375.CEL  
15-Ileum-IEC-GF-GSM350376.CEL  
14-Ileum-IEC-GSM350371.CEL  
13-Small-intestine-epithelium-RMINEP002001.CEL  
12-Small-intestine-epithelium-RMINEP001001.CEL  
11-FAE-RMPYEP002001.CEL  
10-FAE-RMPYEP001001.CEL  
09-Ileum-IEC-GSM190797.CEL  
08-Ileum-IEC-GSM190796.CEL  
07-Ileum-IEC-GSM190795.CEL  
06-CT-v-M-cells-GSM190794.CEL  
05-CT-v-M-cells-GSM190793.CEL  
04-CT-v-M-cells-GSM190792.CEL  
03-PP-M-cells-GSM190791.CEL  
02-PP-M-cells-GSM190790.CEL  
01-PP-M-cells-GSM190789.CEL



Cluster0290\_High in mast cells and NH cells (7 nodes)

2,725.3  
2,581.8  
2,438.4  
2,295  
2,151.5  
2,008.1  
1,864.7  
1,721.2  
1,577.8  
1,434.4  
1,290.9  
1,147.5  
1,004  
860.8  
717.2  
573.7  
430.3  
286.9  
143.4  
0

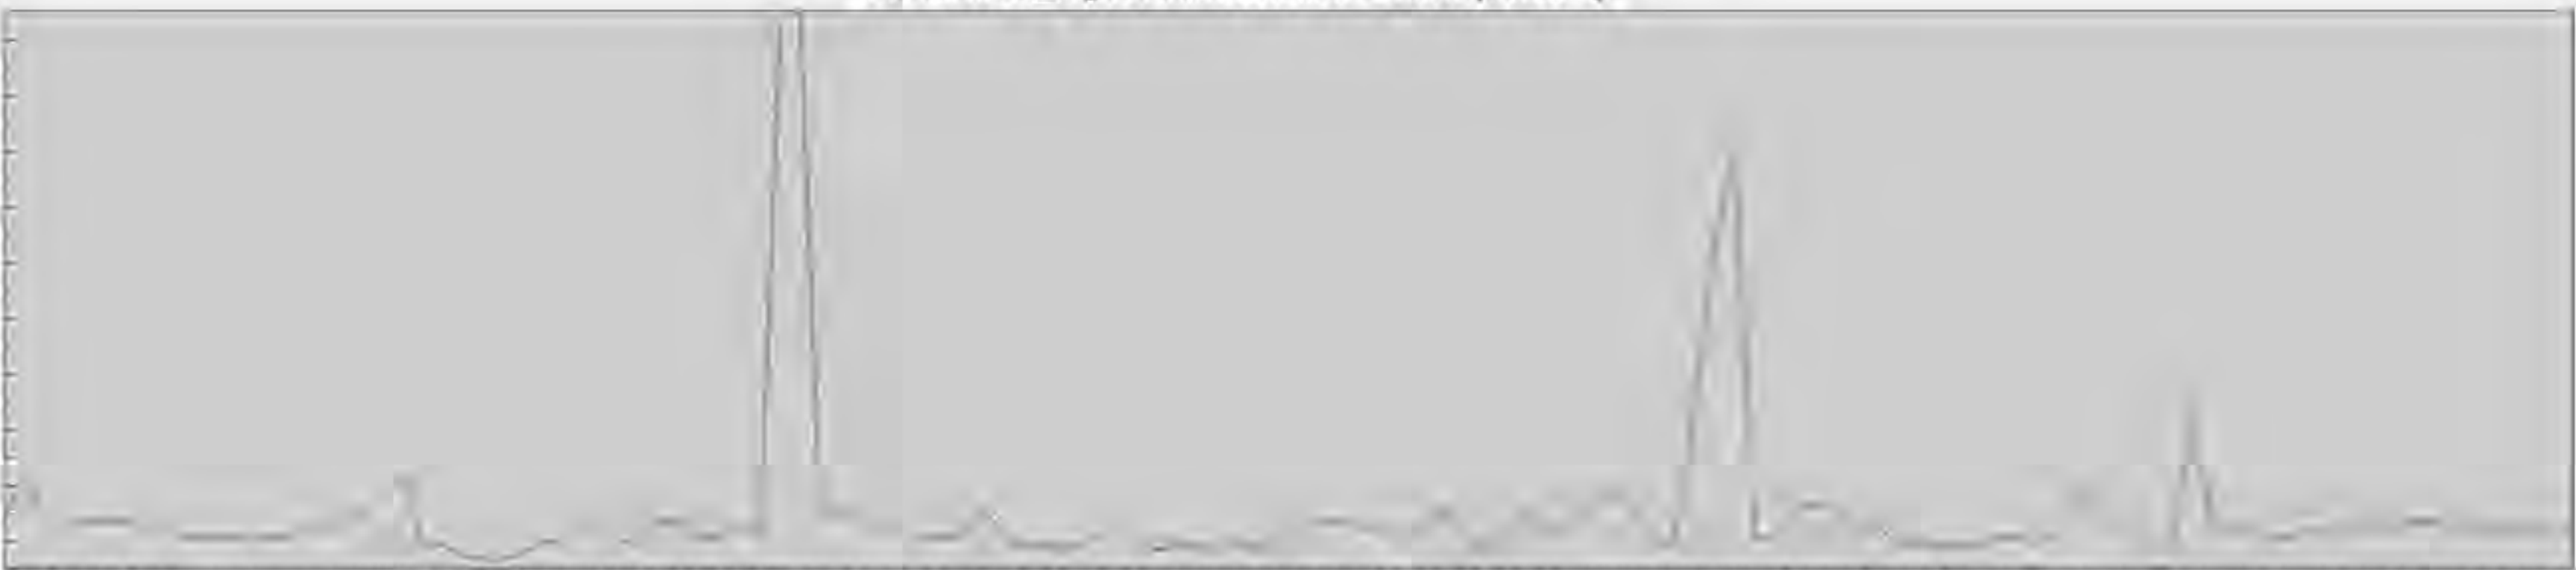

130-NALT GSM289411 CEL  
129-NALT GSM289410 CEL  
128-NALT GSM289409 CEL  
127-NALT GSM289408 CEL  
126-Colon-d9 GSM1988105 CEL  
125-Colon-d9 GSM1988103 CEL  
124-Colon-d9 GSM1988102 CEL  
123-Colon-d4 GSM1988101 CEL  
122-Colon-d4 GSM1988101 CEL  
121-Intestine-large GSM258676 CEL  
120-Intestine-large GSM258675 CEL  
119-Intestine-small GSM258677 CEL  
118-Intestine-small GSM258692 CEL  
117-Lymph-nodes GSM258691 CEL  
116-Lymph-nodes GSM258726 CEL  
115-Spleen GSM258767 CEL  
114-Spleen GSM258767 CEL  
113-Neuro2a GSM258728 CEL  
112-Neuro2a GSM258727 CEL  
111-Astrocytes GSM241898 CEL  
110-mimb GSM258726 CEL  
109-mimb GSM258725 CEL  
108-MIMCD3 GSM258724 CEL  
107-MIMCD3 GSM258723 CEL  
106-Bruce4 GSM258665 CEL  
105-Bruce4 GSM258665 CEL  
104-C2C12 GSM258690 CEL  
103-C2C12 GSM258629 CEL  
102-NH3T3 GSM258730 CEL  
101-NH3T3 GSM258729 CEL  
100-3T3-L1 GSM258610 CEL  
99-3T3-L1 GSM258609 CEL  
98-10T12 GSM258632 CEL  
97-10T12 GSM258631 CEL  
96-Osteoblast-d21 GSM258740 CEL  
95-Osteoblast-d21 GSM258739 CEL  
94-Osteoblast-d14 GSM258738 CEL  
93-Osteoblast-d14 GSM258737 CEL  
92-Osteoblast-d5 GSM258742 CEL  
91-Osteoblast-d5 GSM258741 CEL  
90-Chondrocytes GSM266741 CEL  
89-Chondrocytes GSM266740 CEL  
88-Nat Helper cell GSM465594 CEL  
87-Nat Helper cell GSM465593 CEL  
86-TT cell GSM465596 CEL  
85-MS-1 GSM234692 CEL  
84-Lymph-endo-cells GSM143704 CEL  
83-P-FDC GSM481977 CEL  
82-P-FDC GSM481978 CEL  
81-P-FDC GSM481976 CEL  
80-F-L-Y RMLNDCC003001 CEL  
79-F-L-Y RMLNDCC003001 CEL  
78-Follicular-Bcells GSM258664 CEL  
77-Follicular-Bcells GSM258663 CEL  
76-MZ-Bcell GSM258622 CEL  
75-MZ-Bcell GSM258621 CEL  
74-BAF3 GSM258620 CEL  
73-BAF3 GSM258619 CEL  
72-Tregs GSM258778 CEL  
71-Tregs GSM258777 CEL  
70-T-cells-CD8+ GSM258776 CEL  
69-T-cells-CD8+ GSM258774 CEL  
68-T-cells-CD4+ GSM258773 CEL  
67-T-cells-CD4+ GSM258744 CEL  
66-Thymocyte-DN GSM465595 CEL  
65-Osteoclasts GSM258743 CEL  
64-Osteoclasts GSM258743 CEL  
63-Microglia GSM258721 CEL  
62-Microglia GSM258721 CEL  
61-MM-PS-7h GSM258706 CEL  
60-MM-PS-7h GSM258706 CEL  
59-MM-PS-6h GSM258702 CEL  
58-MM-PS-6h GSM258702 CEL  
57-MM-LPS-6h GSM258699 CEL  
56-MM-LPS-6h GSM258699 CEL  
55-MM-LPS-6h GSM258694 CEL  
54-MM-LPS-6h GSM258694 CEL  
53-Plasmacytoid-DC GSM258650 CEL  
52-Plasmacytoid-DC GSM258649 CEL  
51-CD8a-DC GSM258648 CEL  
50-CD8a-DC GSM258647 CEL  
49-CD8a+DC GSM258646 CEL  
48-CD8a+DC GSM258646 CEL  
47-NK-cells GSM258732 CEL  
46-NK-cells GSM258731 CEL  
45-Mast-cells-IgE+Ad GSM258718 CEL  
44-Mast-cells-IgE+Ad GSM258717 CEL  
43-Mast-cells-IgE GSM258714 CEL  
42-Mast-cells-IgE GSM258713 CEL  
41-Mast-cells GSM258712 CEL  
40-Granulocytes GSM258668 CEL  
39-Granulocytes GSM258667 CEL  
38-GMP GSM258666 CEL  
37-GMP GSM258666 CEL  
36-GMP GSM258665 CEL  
35-CMP GSM258642 CEL  
34-CMP GSM258642 CEL  
33-MEP GSM258720 CEL  
32-MEP GSM258719 CEL  
31-HESC GSM258770 CEL  
30-HESC GSM258769 CEL  
29-Bone marrow GSM258628 CEL  
28-Bone marrow GSM258627 CEL  
27-paneth-cells-GE GSM116358 CEL  
26-paneth-cells-GE GSM116357 CEL  
25-paneth-cells GSM116350 CEL  
24-paneth-cells GSM116359 CEL  
23-paneth-cells GSM318589 CEL  
22-paneth-cells GSM318590 CEL  
21-paneth-cells GSM318590 CEL  
20-Colon-Crypt GSM480375 cel  
19-Colon-Vill GSM480363 cel  
18-Colon-Vill GSM480362 cel  
17-Colon-IEC-Gf GSM349880 CEL  
16-Colon-IEC-Gf GSM350375 CEL  
15-Ileum-IEC-Gf GSM350376 CEL  
14-Ileum-IEC GSM350371 CEL  
13-Small-intestine-epithelium RMINEP002901 CEL  
12-Small-intestine-epithelium RMINEP001001 CEL  
11-FAE-RMPYEP002001 CEL  
10-FAE-RMPYEP001001 CEL  
09-Ileum-IEC GSM190797 CEL  
08-Ileum-IEC GSM190796 CEL  
07-Ileum-IEC GSM190795 CEL  
06-CT-v-M-cells GSM190794 CEL  
05-CT-v-M-cells GSM190793 CEL  
04-CT-v-M-cells GSM190792 CEL  
03-PP-M-cells GSM190791 CEL  
02-PP-M-cells GSM190790 CEL  
01-PP-M-cells GSM190789 CEL



Cluster0291\_Uncertain-low in many (7 nodes)

123.3  
116.8  
110.3  
103.8  
97.3  
90.8  
84.4  
77.9  
71.4  
64.9  
58.4  
51.9  
45.4  
38.9  
32.4  
26  
19.5  
13  
6.5  
0

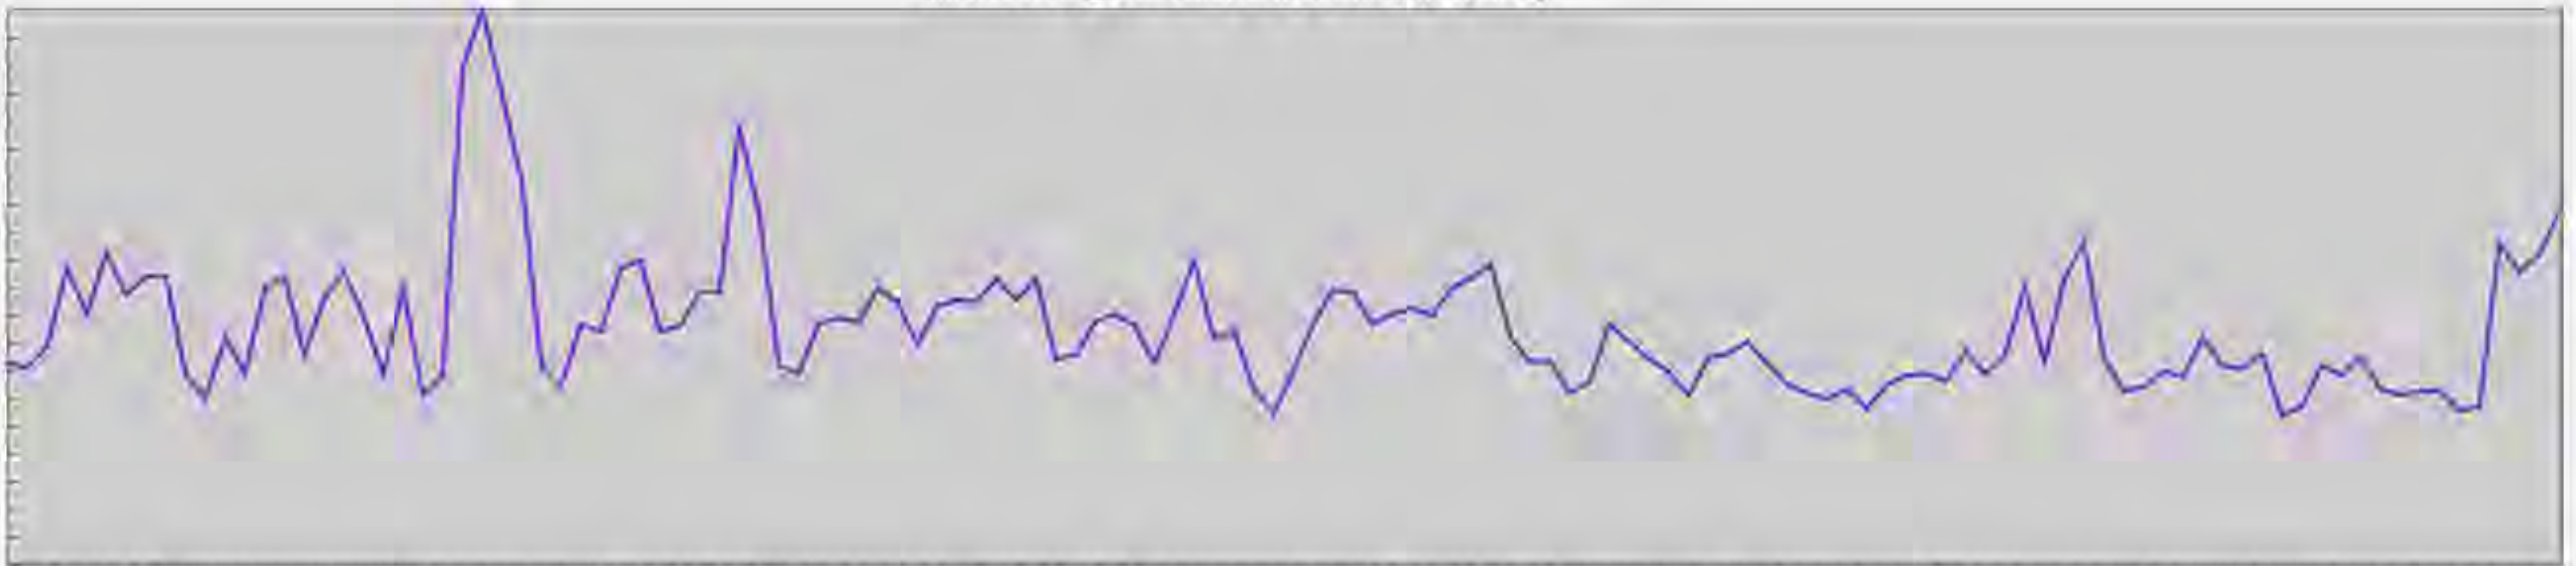

130-NALT GSM289411.CEL  
129-NALT GSM289410.CEL  
128-NALT GSM289409.CEL  
127-NALT GSM289408.CEL  
126-Colon-d9 GSM1988105.CEL  
125-Colon-d9 GSM1988104.CEL  
124-Colon-d9 GSM1988103.CEL  
123-Colon-d4 GSM1988102.CEL  
122-Colon-d4 GSM1988101.CEL  
121-Intestine-large GSM258676.CEL  
120-Intestine-large GSM258675.CEL  
119-Intestine-small GSM258678.CEL  
118-Intestine-small GSM258692.CEL  
117-Lymph-nodes GSM258691.CEL  
116-Lymph-nodes GSM258726.CEL  
115-Spleen GSM258768.CEL  
114-Spleen GSM258767.CEL  
113-Neuro2a GSM258728.CEL  
112-Neuro2a GSM258727.CEL  
111-Astrocytes GSM241898.CEL  
110-mim6 GSM258725.CEL  
109-mim6 GSM258724.CEL  
108-MIMCD3 GSM258723.CEL  
107-MIMCD3 GSM258722.CEL  
106-Bruce4 GSM258656.CEL  
105-Bruce4 GSM258655.CEL  
104-C2C12 GSM258690.CEL  
103-C2C12 GSM258629.CEL  
102-NH3T3 GSM258739.CEL  
101-NH3T3 GSM258738.CEL  
99-3T3-L1 GSM258610.CEL  
99-3T3-L1 GSM258609.CEL  
98-10T12 GSM258632.CEL  
97-10T12 GSM258631.CEL  
96-Osteoblast-d21 GSM258740.CEL  
95-Osteoblast-d21 GSM258739.CEL  
94-Osteoblast-d14 GSM258738.CEL  
93-Osteoblast-d14 GSM258737.CEL  
92-Osteoblast-d5 GSM258742.CEL  
91-Osteoblast-d5 GSM258741.CEL  
90-Chondrocytes GSM266741.CEL  
89-Chondrocytes GSM266740.CEL  
88-Nat Helper cell GSM465594.CEL  
87-Nat Helper cell GSM465593.CEL  
86-LT cell GSM465596.CEL  
85-MS-1 GSM234692.CEL  
84-Lymph-endo-cells GSM143704.CEL  
83-PP-FDC GSM481977.CEL  
82-PP-FDC GSM481978.CEL  
81-PP-FDC GSM481976.CEL  
80-FLY RMLNDC002001.CEL  
79-FLY RMLNDC002001.CEL  
78-Follicular-Bcells GSM258664.CEL  
77-Follicular-Bcells GSM258663.CEL  
76-MZ-Bcell GSM258622.CEL  
75-MZ-Bcell GSM258621.CEL  
74-BAF3 GSM258620.CEL  
73-BAF3 GSM258619.CEL  
72-Tregs GSM258778.CEL  
71-Tregs GSM258777.CEL  
70-T-cells-CD8+ GSM258776.CEL  
69-T-cells-CD8+ GSM258775.CEL  
68-T-cells-CD4+ GSM258774.CEL  
67-T-cells-CD4+ GSM258773.CEL  
66-Thymocyte-DN GSM465595.CEL  
65-Osteoclasts GSM258744.CEL  
64-Microglia GSM258721.CEL  
62-Microglia GSM258721.CEL  
61-PM-M-PS-7h GSM258706.CEL  
60-PM-M-PS-7h GSM258705.CEL  
59-PM-M-PS-7d GSM258702.CEL  
58-PM-M-PS-6h GSM258701.CEL  
57-BMM-PS-6h GSM258699.CEL  
56-BMM-PS-6h GSM258699.CEL  
55-BMM-PS-6h GSM258699.CEL  
54-BMM GSM258694.CEL  
53-Plasmacytoid-DC GSM258650.CEL  
52-Plasmacytoid-DC GSM258649.CEL  
51-CD8a-DC GSM258648.CEL  
50-CD8a-DC GSM258647.CEL  
49-CD8a+DC GSM258646.CEL  
48-CD8a+DC GSM258645.CEL  
47-NK-cells GSM258732.CEL  
46-NK-cells GSM258731.CEL  
45-Mast-cells-IgE+Ad GSM258718.CEL  
44-Mast-cells-IgE+Ad GSM258717.CEL  
43-Mast-cells-IgE GSM258714.CEL  
42-Mast-cells-IgE GSM258713.CEL  
41-Mast-cells GSM258712.CEL  
40-Granulocytes GSM258711.CEL  
39-Granulocytes GSM258668.CEL  
38-Granulocytes GSM258667.CEL  
37-GMP GSM258666.CEL  
36-GMP GSM258665.CEL  
35-GMP GSM258664.CEL  
34-CMP GSM258642.CEL  
33-MEP GSM258720.CEL  
32-MEP GSM258719.CEL  
31-HSC GSM258770.CEL  
30-HSC GSM258770.CEL  
29-Bone marrow GSM258628.CEL  
28-Bone marrow GSM258627.CEL  
27-Paneth-cells-GE GSM116358.CEL  
26-Paneth-cells-GE GSM116357.CEL  
25-Paneth-cells GSM116350.CEL  
24-Paneth-cells GSM116359.CEL  
23-Paneth-cells GSM318589.CEL  
22-Paneth-cells GSM318590.CEL  
21-Colon-Crypt GSM480375.CEL  
20-Colon-Crypt GSM480374.CEL  
19-Colon-Vill GSM480363.CEL  
18-Colon-Vill GSM480362.CEL  
17-Colon-IEC-GE GSM349880.CEL  
16-Colon-IEC-GE GSM350375.CEL  
15-Ileum-IEC-TGF GSM350376.CEL  
14-Ileum-IEC GSM350371.CEL  
13-Small-intestine-epithelium RMINEP002001.CEL  
12-Small-intestine-epithelium RMINEP001001.CEL  
11-FAE-RMPYEP002001.CEL  
10-FAE-RMPYEP001001.CEL  
09-Ileum-IEC GSM190797.CEL  
08-Ileum-IEC GSM190796.CEL  
07-Ileum-IEC GSM190795.CEL  
06-CT-v-M-cells GSM190794.CEL  
05-CT-v-M-cells GSM190793.CEL  
04-CT-v-M-cells GSM190792.CEL  
03-PP-M-cells GSM190791.CEL  
02-PP-M-cells GSM190790.CEL  
01-PP-M-cells GSM190789.CEL







Cluster0293\_House keeping (7 nodes)

13,695  
12,974.2  
12,253.4  
11,532.6  
10,811.8  
10,091  
9,370.3  
8,649.5  
7,928.7  
7,207.9  
6,487.1  
5,766.3  
5,045.5  
4,324.7  
3,603.9  
2,883.2  
2,162.4  
1,441.6  
720.8  
0

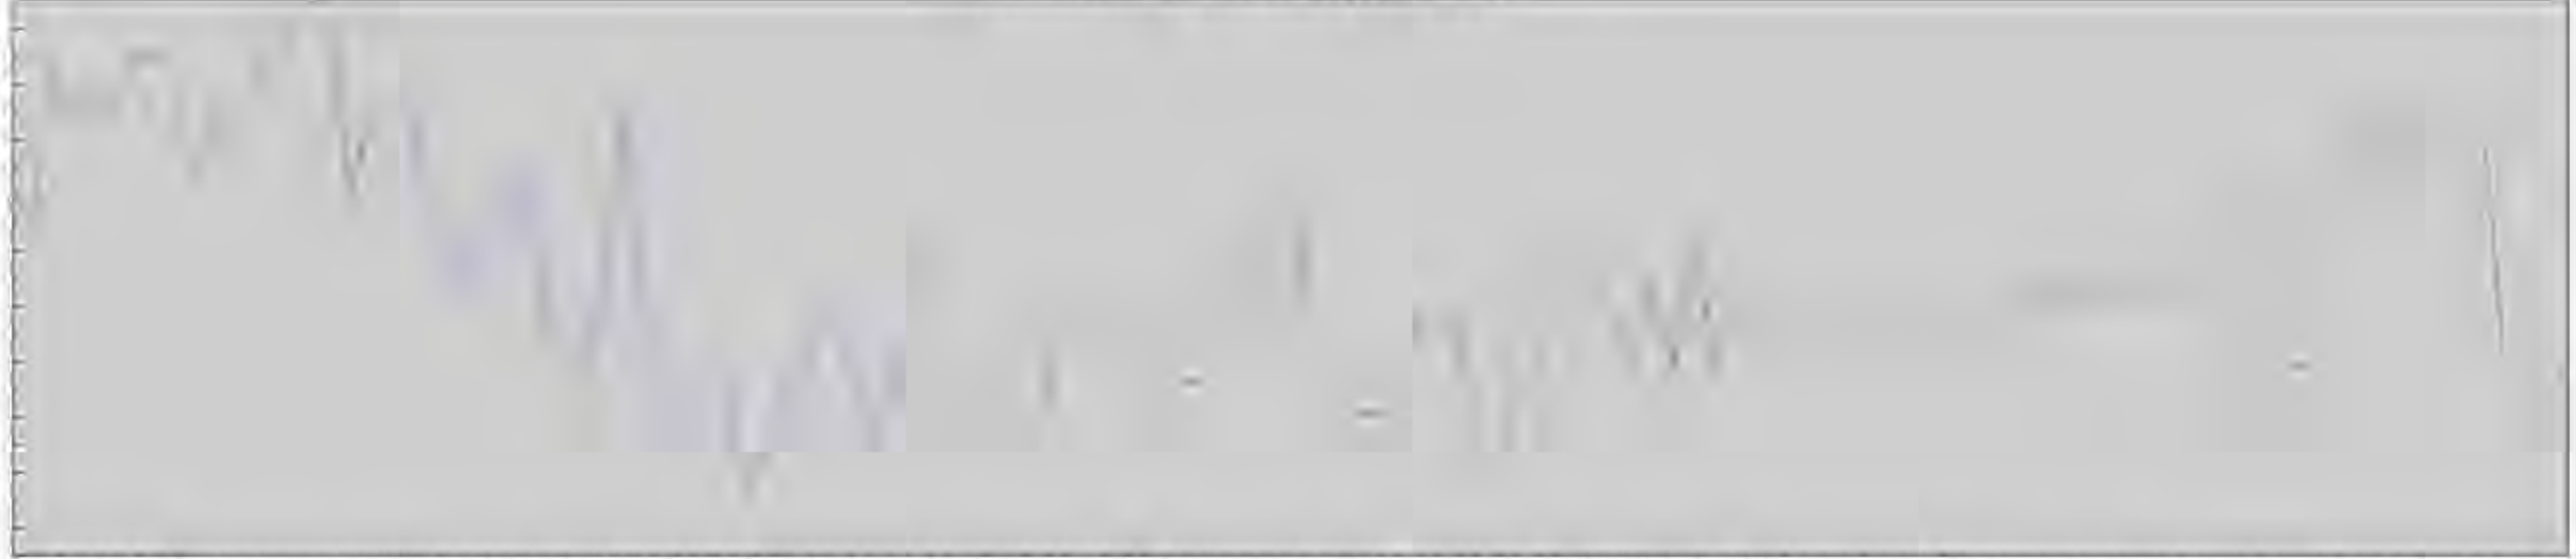

|     |                            |              |     |
|-----|----------------------------|--------------|-----|
| 130 | NALT                       | GSM289411    | CEL |
| 129 | NALT                       | GSM289410    | CEL |
| 128 | NALT                       | GSM289409    | CEL |
| 127 | NALT                       | GSM289408    | CEL |
| 126 | Colon-d9                   | GSM1988105   | CEL |
| 125 | Colon-d9                   | GSM1988104   | CEL |
| 124 | Colon-d9                   | GSM1988103   | CEL |
| 123 | Colon-d4                   | GSM1988102   | CEL |
| 122 | Colon-d4                   | GSM1988101   | CEL |
| 121 | Intestine-large            | GSM258676    | CEL |
| 120 | Intestine-large            | GSM258675    | CEL |
| 119 | Intestine-small            | GSM258678    | CEL |
| 118 | Intestine-small            | GSM258692    | CEL |
| 117 | Lymph-nodes                | GSM258691    | CEL |
| 116 | Lymph-nodes                | GSM258679    | CEL |
| 115 | Spleen                     | GSM258677    | CEL |
| 114 | Spleen                     | GSM258676    | CEL |
| 113 | Neuro2a                    | GSM258728    | CEL |
| 112 | Neuro2a                    | GSM258727    | CEL |
| 111 | Astrocytes                 | GSM241898    | CEL |
| 110 | mim6                       | GSM258726    | CEL |
| 109 | mim6                       | GSM258725    | CEL |
| 108 | MIMCD3                     | GSM258724    | CEL |
| 107 | MIMCD3                     | GSM258723    | CEL |
| 106 | Bruce4                     | GSM258656    | CEL |
| 105 | Bruce4                     | GSM258655    | CEL |
| 104 | C2C12                      | GSM258690    | CEL |
| 103 | C2C12                      | GSM258689    | CEL |
| 102 | NH3T3                      | GSM258730    | CEL |
| 101 | NH3T3                      | GSM258729    | CEL |
| 100 | 3T3-L1                     | GSM258610    | CEL |
| 99  | 3T3-L1                     | GSM258609    | CEL |
| 98  | 10T12                      | GSM258632    | CEL |
| 97  | 10T12                      | GSM258631    | CEL |
| 96  | Osteoblast-d21             | GSM258740    | CEL |
| 95  | Osteoblast-d21             | GSM258739    | CEL |
| 94  | Osteoblast-d14             | GSM258738    | CEL |
| 93  | Osteoblast-d14             | GSM258737    | CEL |
| 92  | Osteoblast-d5              | GSM258742    | CEL |
| 91  | Osteoblast-d5              | GSM258741    | CEL |
| 90  | Chondrocytes               | GSM266741    | CEL |
| 89  | Chondrocytes               | GSM266740    | CEL |
| 88  | Nat Helper cell            | GSM465594    | CEL |
| 87  | Nat Helper cell            | GSM465593    | CEL |
| 86  | Tt cell                    | GSM465596    | CEL |
| 85  | MS-1                       | GSM234692    | CEL |
| 84  | Lymph-endo-cells           | GSM143704    | CEL |
| 83  | PP-FDC                     | GSM481977    | CEL |
| 82  | PP-FDC                     | GSM481978    | CEL |
| 81  | PP-FDC                     | GSM481976    | CEL |
| 80  | PP-FDC                     | GSM481975    | CEL |
| 79  | F-LY                       | RMLNDC002001 | CEL |
| 78  | Follicular-Bcells          | GSM258664    | CEL |
| 77  | Follicular-Bcells          | GSM258663    | CEL |
| 76  | MZ-Bcell                   | GSM258627    | CEL |
| 75  | MZ-Bcell                   | GSM258621    | CEL |
| 74  | BAF3                       | GSM258620    | CEL |
| 73  | BAF3                       | GSM258619    | CEL |
| 72  | Tregs                      | GSM258778    | CEL |
| 71  | T-cells-CD8+               | GSM258777    | CEL |
| 70  | T-cells-CD8+               | GSM258776    | CEL |
| 69  | T-cells-CD8+               | GSM258775    | CEL |
| 68  | T-cells-CD4+               | GSM258774    | CEL |
| 67  | T-cells-CD4+               | GSM258773    | CEL |
| 66  | Thymocyte-DN               | GSM465595    | CEL |
| 65  | Osteoclasts                | GSM258744    | CEL |
| 64  | Osteoclasts                | GSM258743    | CEL |
| 63  | Microglia                  | GSM258721    | CEL |
| 62  | Microglia                  | GSM258720    | CEL |
| 61  | PM-M-PS-7h                 | GSM268706    | CEL |
| 60  | PM-M-PS-7h                 | GSM268705    | CEL |
| 59  | PM-M-PS-6h                 | GSM258702    | CEL |
| 58  | PM-M-PS-6h                 | GSM258701    | CEL |
| 57  | PM-M-PS-6h                 | GSM258699    | CEL |
| 56  | PM-M-PS-6h                 | GSM258698    | CEL |
| 55  | PM-M-PS-6h                 | GSM258697    | CEL |
| 54  | PM-M-PS-6h                 | GSM258696    | CEL |
| 53  | PM-M-PS-6h                 | GSM258695    | CEL |
| 52  | PM-M-PS-6h                 | GSM258694    | CEL |
| 51  | PM-M-PS-6h                 | GSM258693    | CEL |
| 50  | PM-M-PS-6h                 | GSM258692    | CEL |
| 49  | CD8a+DC                    | GSM258646    | CEL |
| 48  | CD8a+DC                    | GSM258645    | CEL |
| 47  | NK-cells                   | GSM258732    | CEL |
| 46  | NK-cells                   | GSM258731    | CEL |
| 45  | Mast-cells-IgE+Ad          | GSM258718    | CEL |
| 44  | Mast-cells-IgE+Ad          | GSM258717    | CEL |
| 43  | Mast-cells-IgE             | GSM258714    | CEL |
| 42  | Mast-cells-IgE             | GSM258713    | CEL |
| 41  | Mast-cells                 | GSM258712    | CEL |
| 40  | Mast-cells                 | GSM258711    | CEL |
| 39  | Granulocytes               | GSM258668    | CEL |
| 38  | Granulocytes               | GSM258667    | CEL |
| 37  | GMP                        | GSM258666    | CEL |
| 36  | GMP                        | GSM258665    | CEL |
| 35  | GMP                        | GSM258664    | CEL |
| 34  | GMP                        | GSM258663    | CEL |
| 33  | GMP                        | GSM258662    | CEL |
| 32  | GMP                        | GSM258661    | CEL |
| 31  | MEP                        | GSM258720    | CEL |
| 30  | MEP                        | GSM258719    | CEL |
| 29  | HSC                        | GSM258770    | CEL |
| 28  | Bone marrow                | GSM258628    | CEL |
| 27  | Bone marrow                | GSM258627    | CEL |
| 26  | paneth-cells-GF-1          | GSM116357    | CEL |
| 25  | paneth-cells-GF-1          | GSM116356    | CEL |
| 24  | paneth-cells-GF-1          | GSM116355    | CEL |
| 23  | paneth-cells-GF-1          | GSM116354    | CEL |
| 22  | paneth-cells-GF-1          | GSM116353    | CEL |
| 21  | paneth-cells-GF-1          | GSM116352    | CEL |
| 20  | Colon-Crypt                | GSM480374    | cel |
| 19  | Colon-Vill                 | GSM480363    | cel |
| 18  | Colon-Vill                 | GSM480362    | cel |
| 17  | Colon-IEC-GF               | GSM349880    | CEL |
| 16  | Colon-IEC-GF               | GSM350375    | CEL |
| 15  | ileum-IEC                  | GSM350376    | CEL |
| 14  | ileum-IEC                  | GSM350371    | CEL |
| 13  | Small-intestine-epithelium | RMINEP002001 | CEL |
| 12  | Small-intestine-epithelium | RMINEP001001 | CEL |
| 11  | FAE                        | RMPYEP002001 | CEL |
| 10  | FAE                        | RMPYEP001001 | CEL |
| 09  | ileum-IEC                  | GSM190797    | CEL |
| 08  | ileum-IEC                  | GSM190796    | CEL |
| 07  | ileum-IEC                  | GSM190795    | CEL |
| 06  | CT-v-M-cells               | GSM190794    | CEL |
| 05  | CT-v-M-cells               | GSM190793    | CEL |
| 04  | PP-M-cells                 | GSM190792    | CEL |
| 03  | PP-M-cells                 | GSM190791    | CEL |
| 02  | PP-M-cells                 | GSM190790    | CEL |
| 01  | PP-M-cells                 | GSM190789    | CEL |







Cluster0295\_Uncertain (7 nodes)

197.1  
186.7  
176.4  
166  
155.6  
145.2  
134.9  
124.5  
114.1  
103.7  
93.4  
83  
72.6  
62.2  
51.9  
41.5  
31.1  
20.7  
10.4  
0

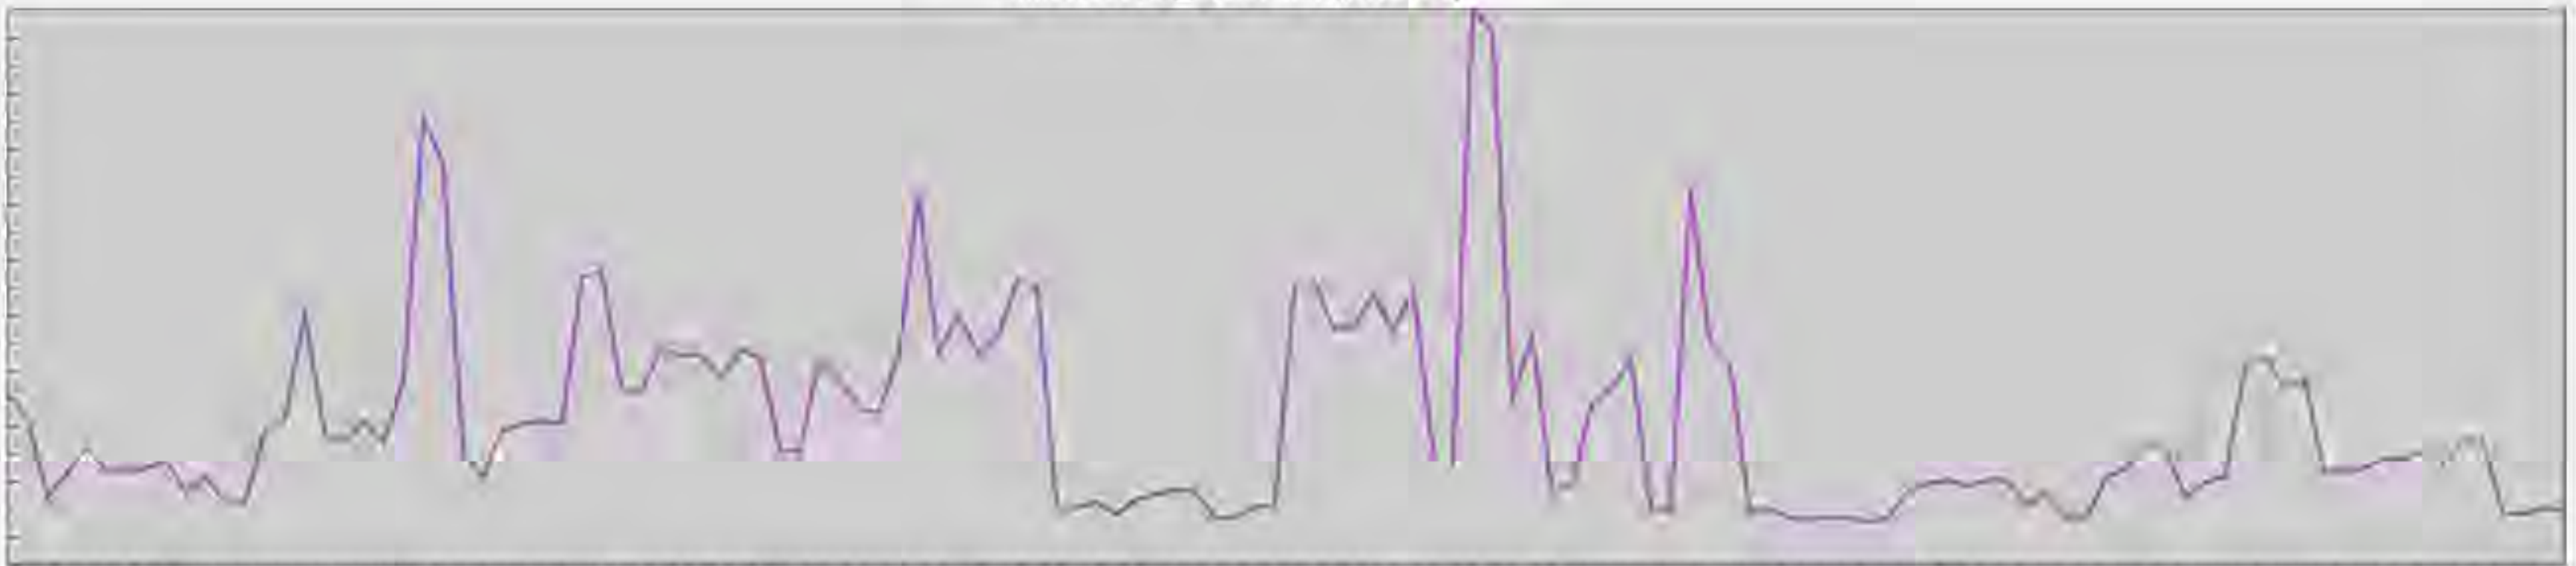

01-PP-M-cells\_GSM190789.CEL  
02-PP-M-cells\_GSM190790.CEL  
03-PP-M-cells\_GSM190791.CEL  
04-CT-v-M-cells\_GSM190792.CEL  
05-CT-v-M-cells\_GSM190793.CEL  
06-CT-v-M-cells\_GSM190794.CEL  
07-Ileum-IEC\_GSM190795.CEL  
08-Ileum-IEC\_GSM190796.CEL  
09-Ileum-IEC\_GSM190797.CEL  
10-FAE-RMPYEP001001.CEL  
11-FAE-RMPYEP002001.CEL  
12-Small-intestine-epithelium\_RMINEP001001.CEL  
13-Small-intestine-epithelium\_RMINEP002001.CEL  
14-Ileum-IEC\_GSM350371.CEL  
15-Ileum-IEC\_GSM350375.CEL  
16-Colon-IEC-GF\_GSM349880.CEL  
17-Colon-VIII\_GSM480362.CEL  
18-Colon-VIII\_GSM480363.CEL  
19-Colon-Crypt\_GSM480374.CEL  
20-Colon-Crypt\_GSM480375.CEL  
21-Colon-Crypt\_GSM480376.CEL  
22-Paneth-cells\_GSM318589.CEL  
23-Paneth-cells\_GSM318590.CEL  
24-Paneth-cells\_GSM116350.CEL  
25-Paneth-cells\_GSM116351.CEL  
26-Paneth-cells-GF-1\_GSM116357.CEL  
27-Paneth-cells-GF-1\_GSM116358.CEL  
28-Bone marrow\_GSM258627.CEL  
29-Bone marrow\_GSM258628.CEL  
30-HSC\_GSM258770.CEL  
31-HSC\_GSM258771.CEL  
32-MEP\_GSM258772.CEL  
33-MEP\_GSM258773.CEL  
34-MEP\_GSM258774.CEL  
35-GMP\_GSM258665.CEL  
36-GMP\_GSM258666.CEL  
37-GMP\_GSM258667.CEL  
38-GMP\_GSM258668.CEL  
39-Granulocytes\_GSM258669.CEL  
40-Mast-cells\_GSM258711.CEL  
41-Mast-cells\_GSM258712.CEL  
42-Mast-cells-IgE\_GSM258713.CEL  
43-Mast-cells-IgE+Ad\_GSM258714.CEL  
44-Mast-cells-IgE+Ad\_GSM258718.CEL  
45-Mast-cells-IgE+Ad\_GSM258719.CEL  
46-NK-cells\_GSM258732.CEL  
47-NK-cells\_GSM258733.CEL  
48-CD8a+DC\_GSM258645.CEL  
49-CD8a+DC\_GSM258646.CEL  
50-CD8a+DC\_GSM258647.CEL  
51-Plasmacytoid-DC\_GSM258649.CEL  
52-Plasmacytoid-DC\_GSM258650.CEL  
53-BMM-GSM258694.CEL  
54-BMM-GSM258695.CEL  
55-BMM-LPS-6h\_GSM258699.CEL  
56-BMM-LPS-6h\_GSM258700.CEL  
57-BMM-LPS-7h\_GSM258702.CEL  
58-BMM-LPS-7h\_GSM258706.CEL  
59-Microglia\_GSM258721.CEL  
60-Microglia\_GSM258722.CEL  
61-Osteoclasts\_GSM258743.CEL  
62-Osteoclasts\_GSM258744.CEL  
63-Thymocyte-DN\_GSM465595.CEL  
64-Thymocyte-DN\_GSM465596.CEL  
65-Tregs\_GSM258778.CEL  
66-Tregs\_GSM258779.CEL  
67-Tregs\_GSM258780.CEL  
68-T-cells-CD8+GSM258774.CEL  
69-T-cells-CD8+GSM258775.CEL  
70-T-cells-CD8+GSM258776.CEL  
71-Tregs\_GSM258777.CEL  
72-Tregs\_GSM258778.CEL  
73-BAF3\_GSM258620.CEL  
74-BAF3\_GSM258621.CEL  
75-MZ-Bcell\_GSM258622.CEL  
76-MZ-Bcell\_GSM258623.CEL  
77-Follicular-Bcells\_GSM258664.CEL  
78-Follicular-Bcells\_GSM258665.CEL  
79-FLY-RMLNDC002001.CEL  
80-FLY-RMLNDC003001.CEL  
81-PP-FDC\_GSM481976.CEL  
82-PP-FDC\_GSM481977.CEL  
83-PP-FDC\_GSM481978.CEL  
84-Lymph-endo-cells\_GSM143704.CEL  
85-MS-1\_GSM234692.CEL  
86-LTcell\_GSM465596.CEL  
87-Nat Helper cell\_GSM465593.CEL  
88-Nat Helper cell\_GSM465594.CEL  
89-Chondrocytes\_GSM266740.CEL  
90-Chondrocytes\_GSM266741.CEL  
91-Osteoblast-d5\_GSM258741.CEL  
92-Osteoblast-d5\_GSM258742.CEL  
93-Osteoblast-d14\_GSM258737.CEL  
94-Osteoblast-d14\_GSM258738.CEL  
95-Osteoblast-d21\_GSM258739.CEL  
96-Osteoblast-d21\_GSM258740.CEL  
97-10T12\_GSM258631.CEL  
98-10T12\_GSM258632.CEL  
99-3T3-L1\_GSM258609.CEL  
100-3T3-L1\_GSM258610.CEL  
101-NH3T3\_GSM258729.CEL  
102-NH3T3\_GSM258730.CEL  
103-C2C12\_GSM258629.CEL  
104-Bruce4\_GSM258690.CEL  
105-Bruce4\_GSM258691.CEL  
106-MIMCD3\_GSM258723.CEL  
107-MIMCD3\_GSM258724.CEL  
108-MIMCD3\_GSM258725.CEL  
109-mim6\_GSM258726.CEL  
110-mim6\_GSM258727.CEL  
111-Astrocytes\_GSM241898.CEL  
112-Astrocytes\_GSM241899.CEL  
113-Spleen\_GSM258767.CEL  
114-Spleen\_GSM258768.CEL  
115-Spleen\_GSM258769.CEL  
116-Lymph-nodes\_GSM258691.CEL  
117-Lymph-nodes\_GSM258692.CEL  
118-Intestine-small\_GSM258677.CEL  
119-Intestine-small\_GSM258678.CEL  
120-Intestine-large\_GSM258679.CEL  
121-Intestine-large\_GSM258676.CEL  
122-Colon-d4\_GSM198101.CEL  
123-Colon-d4\_GSM198102.CEL  
124-Colon-d9\_GSM198103.CEL  
125-Colon-d9\_GSM198104.CEL  
126-NALT\_GSM289408.CEL  
127-NALT\_GSM289409.CEL  
128-NALT\_GSM289410.CEL  
129-NALT\_GSM289411.CEL



Cluster0296\_House keeping (7 nodes)

2,309  
2,187.5  
2,066  
1,944.4  
1,822.9  
1,701.4  
1,579.9  
1,458.3  
1,336.8  
1,215.3  
1,093.7  
972.2  
850.7  
729.2  
607.6  
486.1  
364.6  
243.1  
121.5  
0

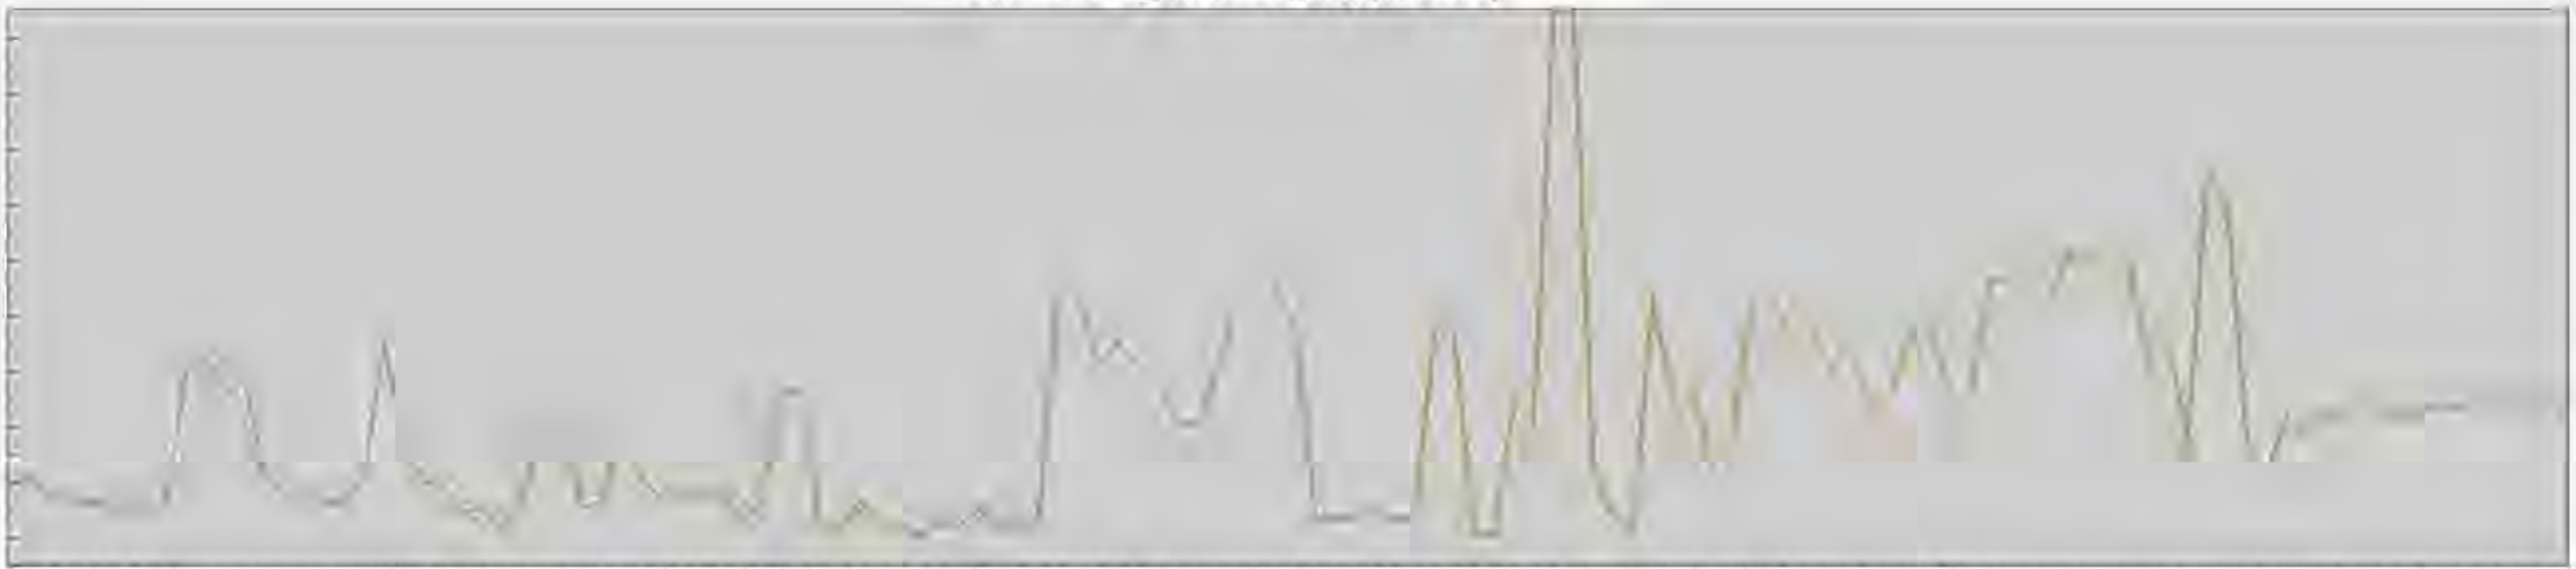

130-NALT GSM289411.CEL  
129-NALT GSM289410.CEL  
128-NALT GSM289409.CEL  
127-NALT GSM289408.CEL  
126-Colon-d9 GSM1988105.CEL  
125-Colon-d9 GSM1988104.CEL  
124-Colon-d9 GSM1988103.CEL  
123-Colon-d4 GSM1988102.CEL  
122-Colon-d4 GSM1988101.CEL  
121-Intestine-large GSM258676.CEL  
120-Intestine-large GSM258675.CEL  
119-Intestine-small GSM258678.CEL  
118-Intestine-small GSM258692.CEL  
117-Lymph-nodes GSM258691.CEL  
116-Lymph-nodes GSM258726.CEL  
115-Spleen GSM258768.CEL  
114-Spleen GSM258767.CEL  
113-Neuro2a GSM258728.CEL  
112-Neuro2a GSM258727.CEL  
111-Astrocytes GSM241898.CEL  
110-mim6 GSM258725.CEL  
109-mim6 GSM258724.CEL  
108-MIMCD3 GSM258723.CEL  
107-MIMCD3 GSM258722.CEL  
106-Bruce4 GSM258656.CEL  
105-Bruce4 GSM258655.CEL  
104-C2C12 GSM258690.CEL  
103-C2C12 GSM258689.CEL  
102-NH3T3 GSM258739.CEL  
101-NH3T3 GSM258738.CEL  
100-3T3-L1 GSM258610.CEL  
99-3T3-L1 GSM258609.CEL  
98-10T12 GSM258632.CEL  
97-10T12 GSM258631.CEL  
96-Osteoblast-d21 GSM258740.CEL  
95-Osteoblast-d21 GSM258739.CEL  
94-Osteoblast-d14 GSM258738.CEL  
93-Osteoblast-d14 GSM258737.CEL  
92-Osteoblast-d5 GSM258742.CEL  
91-Osteoblast-d5 GSM258741.CEL  
90-Chondrocytes GSM266741.CEL  
89-Chondrocytes GSM266740.CEL  
88-Nat Helper cell GSM465594.CEL  
87-Nat Helper cell GSM465593.CEL  
86-LT cell GSM465596.CEL  
85-MS-1 GSM234692.CEL  
84-Lymph-endc-cells GSM143704.CEL  
83-PP-FDC GSM481977.CEL  
82-PP-FDC GSM481978.CEL  
81-PP-FDC GSM481976.CEL  
80-LY RMLNDC003001.CEL  
79-LY RMLNDC003001.CEL  
78-Follicular-Bcells GSM258664.CEL  
77-Follicular-Bcells GSM258663.CEL  
76-MZ-Bcell GSM258622.CEL  
75-MZ-Bcell GSM258621.CEL  
74-BAF3 GSM258620.CEL  
73-BAF3 GSM258619.CEL  
72-Tregs GSM258778.CEL  
71-Tregs GSM258777.CEL  
70-T-cells-CD8+ GSM258776.CEL  
69-T-cells-CD8+ GSM258775.CEL  
68-T-cells-CD4+ GSM258774.CEL  
67-T-cells-CD4+ GSM258773.CEL  
66-Thymocyte-DN GSM465595.CEL  
65-Osteoclasts GSM258743.CEL  
64-Osteoclasts GSM258744.CEL  
63-Microglia GSM258721.CEL  
62-Microglia GSM258721.CEL  
61-PM-M-PS-7h GSM258706.CEL  
60-PM-M-PS-7h GSM258705.CEL  
59-PM-M-PS-7d GSM258702.CEL  
58-PM-M-PS-6h GSM258701.CEL  
57-PM-M-PS-6h GSM258699.CEL  
56-PM-M-PS-6h GSM258699.CEL  
55-BMM-LPS-6h GSM258694.CEL  
54-BMM-LPS-6h GSM258694.CEL  
53-Plasmacytoid-DC GSM258650.CEL  
52-Plasmacytoid-DC GSM258649.CEL  
51-CD8a-DC GSM258648.CEL  
50-CD8a-DC GSM258647.CEL  
49-CD8a+DC GSM258646.CEL  
48-CD8a+DC GSM258645.CEL  
47-NK-cells GSM258732.CEL  
46-NK-cells GSM258731.CEL  
45-Mast-cells-IgE+Ad GSM258718.CEL  
44-Mast-cells-IgE+Ad GSM258717.CEL  
43-Mast-cells-IgE GSM258714.CEL  
42-Mast-cells-IgE GSM258713.CEL  
41-Mast-cells GSM258712.CEL  
40-Granulocytes GSM258711.CEL  
39-Granulocytes GSM258668.CEL  
38-Granulocytes GSM258667.CEL  
37-GMP GSM258666.CEL  
36-GMP GSM258665.CEL  
35-CMP GSM258642.CEL  
34-CMP GSM258641.CEL  
33-MEP GSM258720.CEL  
32-MEP GSM258719.CEL  
31-HSC GSM258770.CEL  
30-HSC GSM258769.CEL  
29-Bone marrow GSM258628.CEL  
28-Bone marrow GSM258627.CEL  
27-Paneth-cells-GE GSM116358.CEL  
26-Paneth-cells-GE GSM116357.CEL  
25-Paneth-cells GSM116350.CEL  
24-Paneth-cells GSM116359.CEL  
23-Paneth-cells GSM318589.CEL  
22-Paneth-cells GSM318590.CEL  
21-Colon-Crypt GSM480375.CEL  
20-Colon-Crypt GSM480374.CEL  
19-Colon-Vill GSM480363.CEL  
18-Colon-Vill GSM480362.CEL  
17-Colon-IEC-GE GSM349880.CEL  
16-Colon-IEC-GE GSM350375.CEL  
15-Ileum-IEC GSM350376.CEL  
14-Ileum-IEC GSM350371.CEL  
13-Small-intestine-epithelium RMINEP002001.CEL  
12-Small-intestine-epithelium RMINEP001001.CEL  
11-FAE RMPYEP002001.CEL  
10-FAE RMPYEP001001.CEL  
09-Ileum-IEC GSM190797.CEL  
08-Ileum-IEC GSM190796.CEL  
07-Ileum-IEC GSM190795.CEL  
06-CT-v-M-cells GSM190794.CEL  
05-CT-v-M-cells GSM190793.CEL  
04-PP-M-cells GSM190792.CEL  
03-PP-M-cells GSM190791.CEL  
02-PP-M-cells GSM190790.CEL  
01-PP-M-cells GSM190789.CEL



Cluster0297\_Mesenchyme-related/extracellular matrix (7 nodes)

4,757.6  
4,507.2  
4,256.8  
4,006.4  
3,756  
3,505.6  
3,255.2  
3,004.8  
2,754.4  
2,504  
2,253.6  
2,003.2  
1,752.8  
1,502.4  
1,252  
1,001.6  
751.2  
500.8  
250.4  
0

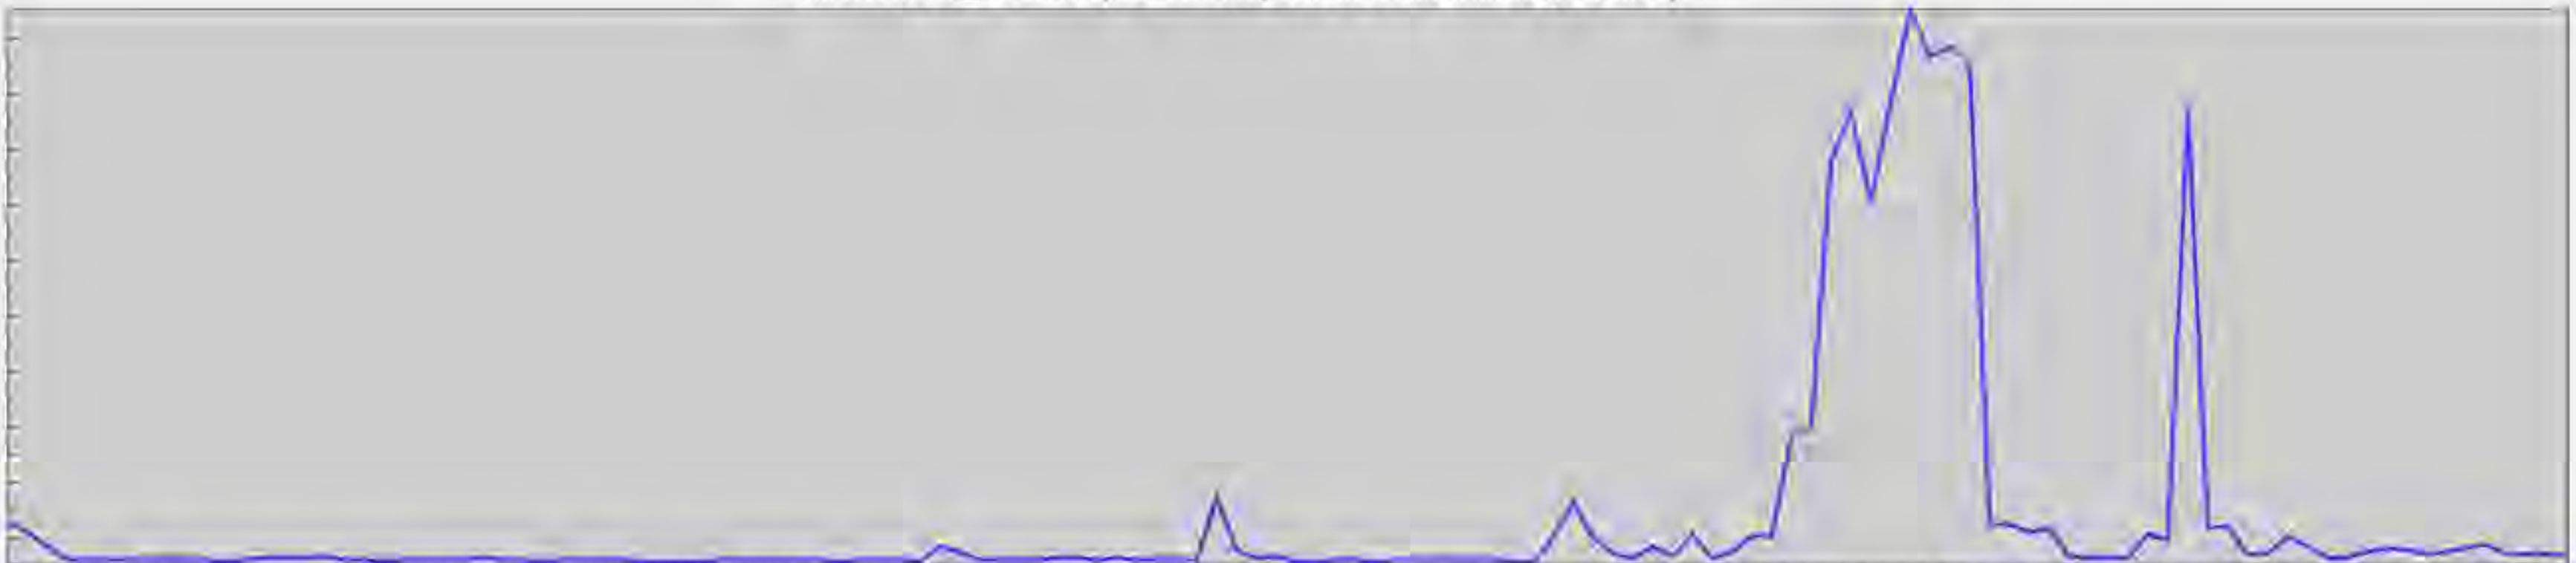

130-NALT GSM289411 CELL  
129-NALT GSM289410 CELL  
128-NALT GSM289409 CELL  
127-NALT GSM289408 CELL  
126-Colon-d9 GSM1988105 CELL  
125-Colon-d9 GSM1988103 CELL  
124-Colon-d9 GSM1988102 CELL  
123-Colon-d4 GSM1988101 CELL  
122-Colon-d4 GSM1988101 CELL  
121-Intestine-large GSM258675 CELL  
120-Intestine-large GSM258675 CELL  
119-Intestine-small GSM258678 CELL  
118-Intestine-small GSM258692 CELL  
117-Lymph-nodes GSM258691 CELL  
116-Lymph-nodes GSM258726 CELL  
115-Spleen GSM258766 CELL  
114-Spleen GSM258767 CELL  
113-Neuro2a GSM258728 CELL  
112-Neuro2a GSM258727 CELL  
111-Astrocytes GSM241898 CELL  
110-mimb GSM258726 CELL  
109-mimb GSM258725 CELL  
108-MIMCD3 GSM258724 CELL  
107-MIMCD3 GSM258723 CELL  
106-Bruce4 GSM258656 CELL  
105-Bruce4 GSM258656 CELL  
104-C2C12 GSM258690 CELL  
103-C2C12 GSM258629 CELL  
102-NH3T3 GSM258730 CELL  
101-NH3T3 GSM258729 CELL  
100-3T3-L1 GSM258610 CELL  
99-3T3-L1 GSM258609 CELL  
98-10T1/2 GSM258632 CELL  
97-10T1/2 GSM258631 CELL  
96-Osteoblast-d21 GSM258740 CELL  
95-Osteoblast-d21 GSM258739 CELL  
94-Osteoblast-d14 GSM258738 CELL  
93-Osteoblast-d14 GSM258737 CELL  
92-Osteoblast-d5 GSM258742 CELL  
91-Osteoblast-d5 GSM258741 CELL  
90-Chondrocytes GSM266741 CELL  
89-Chondrocytes GSM266740 CELL  
88-Nat Helper cell GSM465594 CELL  
87-Nat Helper cell GSM465593 CELL  
86-TT cell GSM465596 CELL  
85-MS-1 GSM234692 CELL  
84-Lymph-endc-cells GSM143704 CELL  
83-PP-FDC GSM481977 CELL  
82-PP-FDC GSM481978 CELL  
81-PP-FDC GSM481976 CELL  
80-D-LY RMLNDCC003001 CELL  
79-D-LY RMLNDCC003001 CELL  
78-Follicular-Bcells GSM258664 CELL  
77-Follicular-Bcells GSM258663 CELL  
76-MZ-Bcell GSM258627 CELL  
75-MZ-Bcell GSM258627 CELL  
74-BAF3 GSM258620 CELL  
73-BAF3 GSM258619 CELL  
72-Tregs GSM258778 CELL  
71-Tregs GSM258777 CELL  
70-T-cells-CD8+ GSM258776 CELL  
69-T-cells-CD8+ GSM258774 CELL  
68-T-cells-CD4+ GSM258773 CELL  
67-T-cells-CD4+ GSM258773 CELL  
66-Thymocyte-DN GSM465595 CELL  
65-Osteoclasts GSM258743 CELL  
64-Osteoclasts GSM258743 CELL  
63-Microglia GSM258721 CELL  
62-Microglia GSM258721 CELL  
61-MM-LPS-7h GSM258706 CELL  
60-MM-LPS-7h GSM258706 CELL  
59-MM-LPS-6h GSM258702 CELL  
58-MM-LPS-6h GSM258702 CELL  
57-MM-LPS-6h GSM258699 CELL  
56-MM-LPS-6h GSM258699 CELL  
55-MM-LPS-6h GSM258694 CELL  
54-MM-LPS-6h GSM258694 CELL  
53-Iasmacryoid-DC GSM258650 CELL  
52-Iasmacryoid-DC GSM258649 CELL  
51-CD8a-DC GSM258648 CELL  
50-CD8a-DC GSM258647 CELL  
49-CD8a+DC GSM258646 CELL  
48-CD8a+DC GSM258646 CELL  
47-NK-cells GSM258732 CELL  
46-NK-cells GSM258731 CELL  
45-Mast-cells-IgE+Ad GSM258718 CELL  
44-Mast-cells-IgE+Ad GSM258717 CELL  
43-Mast-cells-IgE GSM258714 CELL  
42-Mast-cells-IgE GSM258713 CELL  
41-Mast-cells GSM258712 CELL  
40-Granulocytes GSM258668 CELL  
39-Granulocytes GSM258667 CELL  
38-GMP GSM258666 CELL  
37-GMP GSM258666 CELL  
36-GMP GSM258665 CELL  
35-CMP GSM258642 CELL  
34-MEP GSM258641 CELL  
33-MEP GSM258720 CELL  
32-MEP GSM258719 CELL  
31-HSC GSM258770 CELL  
30-HSC GSM258769 CELL  
29-Bone marrow GSM258628 CELL  
28-Bone marrow GSM258627 CELL  
27-paneth-cells-GE GSM116358 CELL  
26-paneth-cells-GE GSM116357 CELL  
25-paneth-cells GSM116350 CELL  
24-paneth-cells GSM116359 CELL  
23-paneth-cells GSM318589 CELL  
22-paneth-cells GSM318590 CELL  
21-paneth-cells GSM480375 CELL  
20-Colon-Crypt GSM480374 CELL  
19-Colon-Vill GSM480363 CELL  
18-Colon-Vill GSM480362 CELL  
17-Colon-IEC-GE GSM349880 CELL  
16-Colon-IEC-GE GSM350375 CELL  
15-Ileum-IEC GSM350376 CELL  
14-Ileum-IEC GSM350371 CELL  
13-Small-intestine-epithelium RMINEP002001 CELL  
12-Small-intestine-epithelium RMINEP001001 CELL  
11-FAE-RMPYEP001001 CELL  
10-FAE-RMPYEP001001 CELL  
09-Ileum-IEC GSM190797 CELL  
08-Ileum-IEC GSM190796 CELL  
07-Ileum-IEC GSM190795 CELL  
06-CT-v-M-cells GSM190794 CELL  
05-CT-v-M-cells GSM190793 CELL  
04-PP-M-cells GSM190792 CELL  
03-PP-M-cells GSM190791 CELL  
02-PP-M-cells GSM190790 CELL  
01-PP-M-cells GSM190789 CELL



Cluster0298\_Uncertain (7 nodes)

6,294.1  
5,962.8  
5,631.6  
5,300.3  
4,969  
4,637.8  
4,306.5  
3,975.2  
3,644  
3,312.7  
2,981.4  
2,650.2  
2,318.9  
1,987.6  
1,656.3  
1,325.1  
993.8  
662.5  
331.3  
0

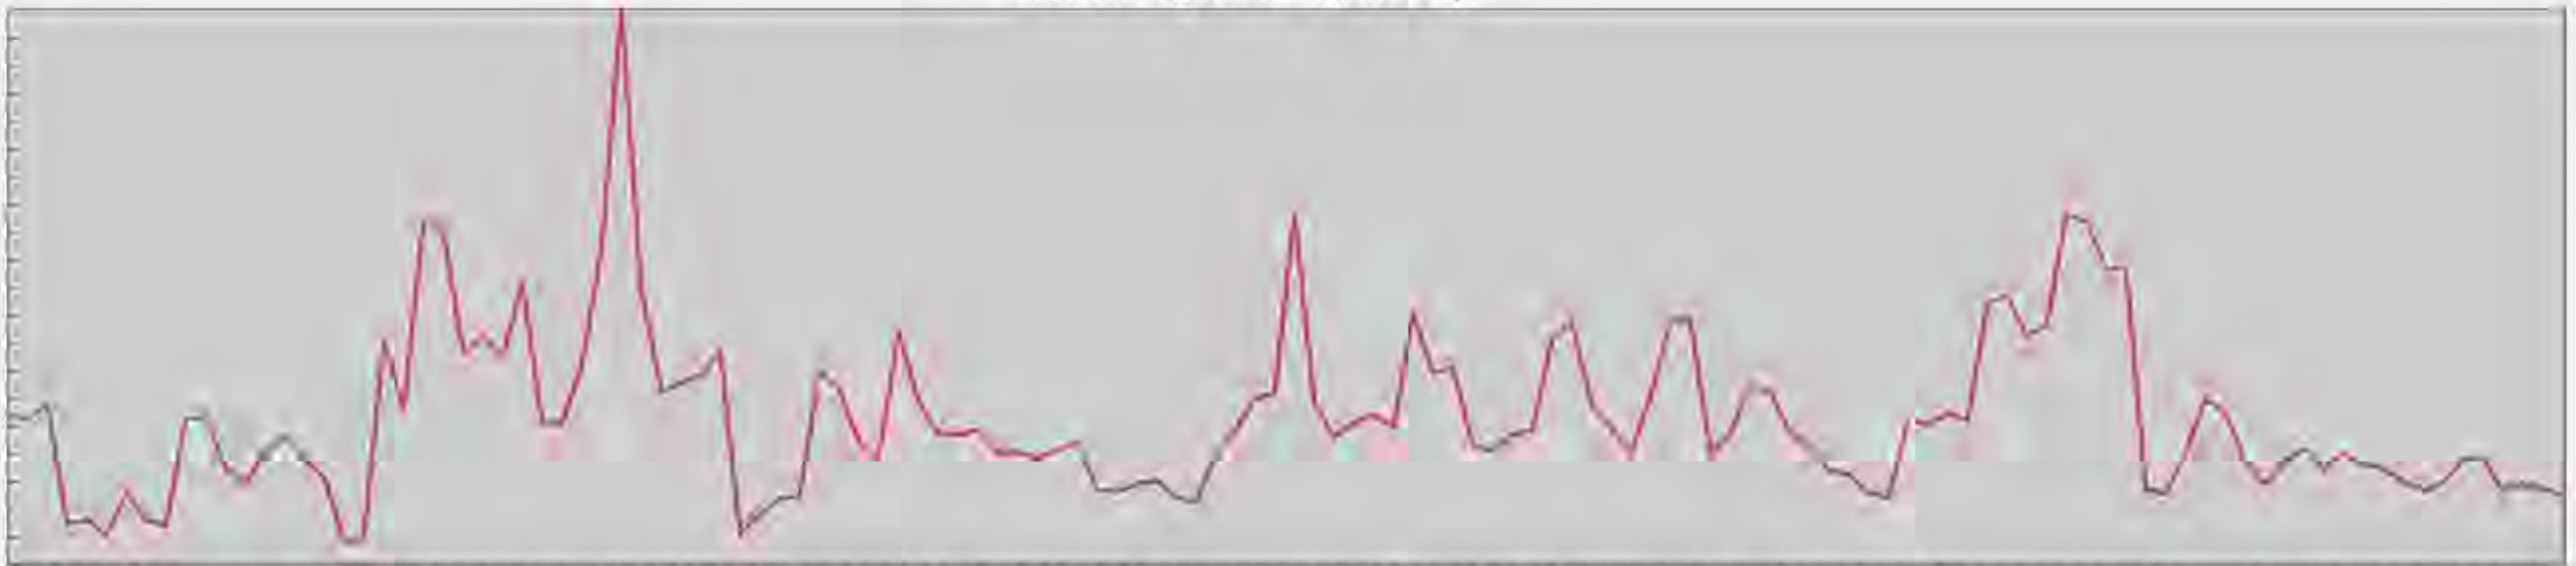

01-PP-M-cells\_GSM190789.CEL  
 02-PP-M-cells\_GSM190790.CEL  
 03-PP-M-cells\_GSM190791.CEL  
 04-CT-v-M-cells\_GSM190792.CEL  
 05-CT-v-M-cells\_GSM190793.CEL  
 06-CT-v-M-cells\_GSM190794.CEL  
 07-Ileum-IEC\_GSM190795.CEL  
 08-Ileum-IEC\_GSM190796.CEL  
 09-Ileum-IEC\_GSM190797.CEL  
 10-FAE-RMPYEP001001.CEL  
 11-FAE-RMPYEP002001.CEL  
 12-SmallIntestine-epithelium\_RMINEP001001.CEL  
 13-SmallIntestine-epithelium\_RMINEP002001.CEL  
 14-Ileum-IEC\_GSM350371.CEL  
 15-Ileum-IEC\_GSM350375.CEL  
 16-Colon-VIII\_GSM480362.CEL  
 17-Colon-VIII\_GSM480363.CEL  
 18-Colon-VIII\_GSM480364.CEL  
 19-Colon-VIII\_GSM480365.CEL  
 20-Colon-Crypt\_GSM480374.CEL  
 21-Colon-Crypt\_GSM480375.CEL  
 22-Paneth-cells\_GSM318590.CEL  
 23-Paneth-cells\_GSM318589.CEL  
 24-Paneth-cells\_GSM116359.CEL  
 25-Paneth-cells\_GSM116359.CEL  
 26-Paneth-cells-GF-1\_GSM116357.CEL  
 27-Paneth-cells-GF-1\_GSM116357.CEL  
 28-Bone marrow\_GSM258627.CEL  
 29-Bone marrow\_GSM258627.CEL  
 30-HSC\_GSM258770.CEL  
 31-HSC\_GSM258770.CEL  
 32-MEP\_GSM258770.CEL  
 33-MEP\_GSM258770.CEL  
 34-MEP\_GSM258770.CEL  
 35-GMP\_GSM258664.CEL  
 36-GMP\_GSM258664.CEL  
 37-GMP\_GSM258664.CEL  
 38-Granulocytes\_GSM258667.CEL  
 39-Granulocytes\_GSM258667.CEL  
 40-Mast-cells\_GSM258711.CEL  
 41-Mast-cells\_GSM258711.CEL  
 42-Mast-cells-IgE\_GSM258713.CEL  
 43-Mast-cells-IgE+Ad\_GSM258714.CEL  
 44-Mast-cells-IgE+Ad\_GSM258714.CEL  
 45-Mast-cells-IgE+Ad\_GSM258718.CEL  
 46-NK-cells\_GSM258731.CEL  
 47-NK-cells\_GSM258731.CEL  
 48-CD8a+DC\_GSM258645.CEL  
 49-CD8a+DC\_GSM258645.CEL  
 50-CD8a-DC\_GSM258647.CEL  
 51-CD8a-DC\_GSM258647.CEL  
 52-Plasmacytoid-DC\_GSM258650.CEL  
 53-Plasmacytoid-DC\_GSM258649.CEL  
 54-BMM-GSM258694.CEL  
 55-BMM-GSM258694.CEL  
 56-BMM-LPS-6h\_GSM258699.CEL  
 57-BMM-LPS-6h\_GSM258699.CEL  
 58-PMM-GSM258702.CEL  
 59-PMM-GSM258702.CEL  
 60-PMM-LPS-7h\_GSM258705.CEL  
 61-PMM-LPS-7h\_GSM258705.CEL  
 62-Microglia\_GSM258721.CEL  
 63-Microglia\_GSM258721.CEL  
 64-Osteoclasts\_GSM258743.CEL  
 65-Osteoclasts\_GSM258744.CEL  
 66-Thymocyte-DN\_GSM465595.CEL  
 67-T-cells-CD4+\_GSM258773.CEL  
 68-T-cells-CD4+\_GSM258773.CEL  
 69-T-cells-CD8+\_GSM258774.CEL  
 70-T-cells-CD8+\_GSM258774.CEL  
 71-Tregs\_GSM258778.CEL  
 72-Tregs\_GSM258778.CEL  
 73-BAF3\_GSM258619.CEL  
 74-BAF3\_GSM258620.CEL  
 75-MZ-Bcell\_GSM258621.CEL  
 76-MZ-Bcell\_GSM258621.CEL  
 77-Follicular-Bcells\_GSM258664.CEL  
 78-Follicular-Bcells\_GSM258664.CEL  
 79-FLY-RMLNDC002001.CEL  
 80-FLY-RMLNDC003001.CEL  
 81-PP-FDC\_GSM481976.CEL  
 82-PP-FDC\_GSM481976.CEL  
 83-PP-FDC\_GSM481977.CEL  
 84-Lymph-endo-cells\_GSM143704.CEL  
 85-MS-1\_GSM234692.CEL  
 86-LTcell\_GSM465596.CEL  
 87-NatHelpercell\_GSM465593.CEL  
 88-NatHelpercell\_GSM465593.CEL  
 89-Chondrocytes\_GSM266741.CEL  
 90-Chondrocytes\_GSM266741.CEL  
 91-Osteoblast-d5\_GSM258741.CEL  
 92-Osteoblast-d5\_GSM258742.CEL  
 93-Osteoblast-d14\_GSM258737.CEL  
 94-Osteoblast-d14\_GSM258737.CEL  
 95-Osteoblast-d21\_GSM258739.CEL  
 96-Osteoblast-d21\_GSM258739.CEL  
 97-10T12\_GSM258631.CEL  
 98-10T12\_GSM258631.CEL  
 99-3T3-L1\_GSM258609.CEL  
 100-3T3-L1\_GSM258610.CEL  
 101-NH3T3\_GSM258729.CEL  
 102-NH3T3\_GSM258729.CEL  
 103-C2C12\_GSM258629.CEL  
 104-C2C12\_GSM258630.CEL  
 105-Bruce4\_GSM258656.CEL  
 106-Bruce4\_GSM258656.CEL  
 107-MIMCD3\_GSM258723.CEL  
 108-MIMCD3\_GSM258723.CEL  
 109-mim6\_GSM258725.CEL  
 110-mim6\_GSM258725.CEL  
 111-Astrocytes\_GSM241898.CEL  
 112-Astrocytes\_GSM241898.CEL  
 113-Spleen\_GSM258767.CEL  
 114-Spleen\_GSM258767.CEL  
 115-Lymph-nodes\_GSM258691.CEL  
 116-Lymph-nodes\_GSM258691.CEL  
 117-Lymph-nodes\_GSM258691.CEL  
 118-Intestine-small\_GSM258692.CEL  
 119-Intestine-small\_GSM258692.CEL  
 120-Intestine-large\_GSM258678.CEL  
 121-Intestine-large\_GSM258678.CEL  
 122-Colon-d4\_GSM198101.CEL  
 123-Colon-d4\_GSM198101.CEL  
 124-Colon-d9\_GSM198103.CEL  
 125-Colon-d9\_GSM198103.CEL  
 126-Colon-d9\_GSM198104.CEL  
 127-NALT\_GSM289408.CEL  
 128-NALT\_GSM289409.CEL  
 129-NALT\_GSM289410.CEL  
 130-NALT\_GSM289411.CEL



Cluster0299\_Uncertain (7 nodes)

4,119.8  
3,902.9  
3,686.1  
3,469.3  
3,252.6  
3,035.6  
2,818.8  
2,602  
2,385.1  
2,168.3  
1,951.5  
1,734.6  
1,517.8  
1,301  
1,084.2  
867.3  
650.5  
433.7  
216.8  
0

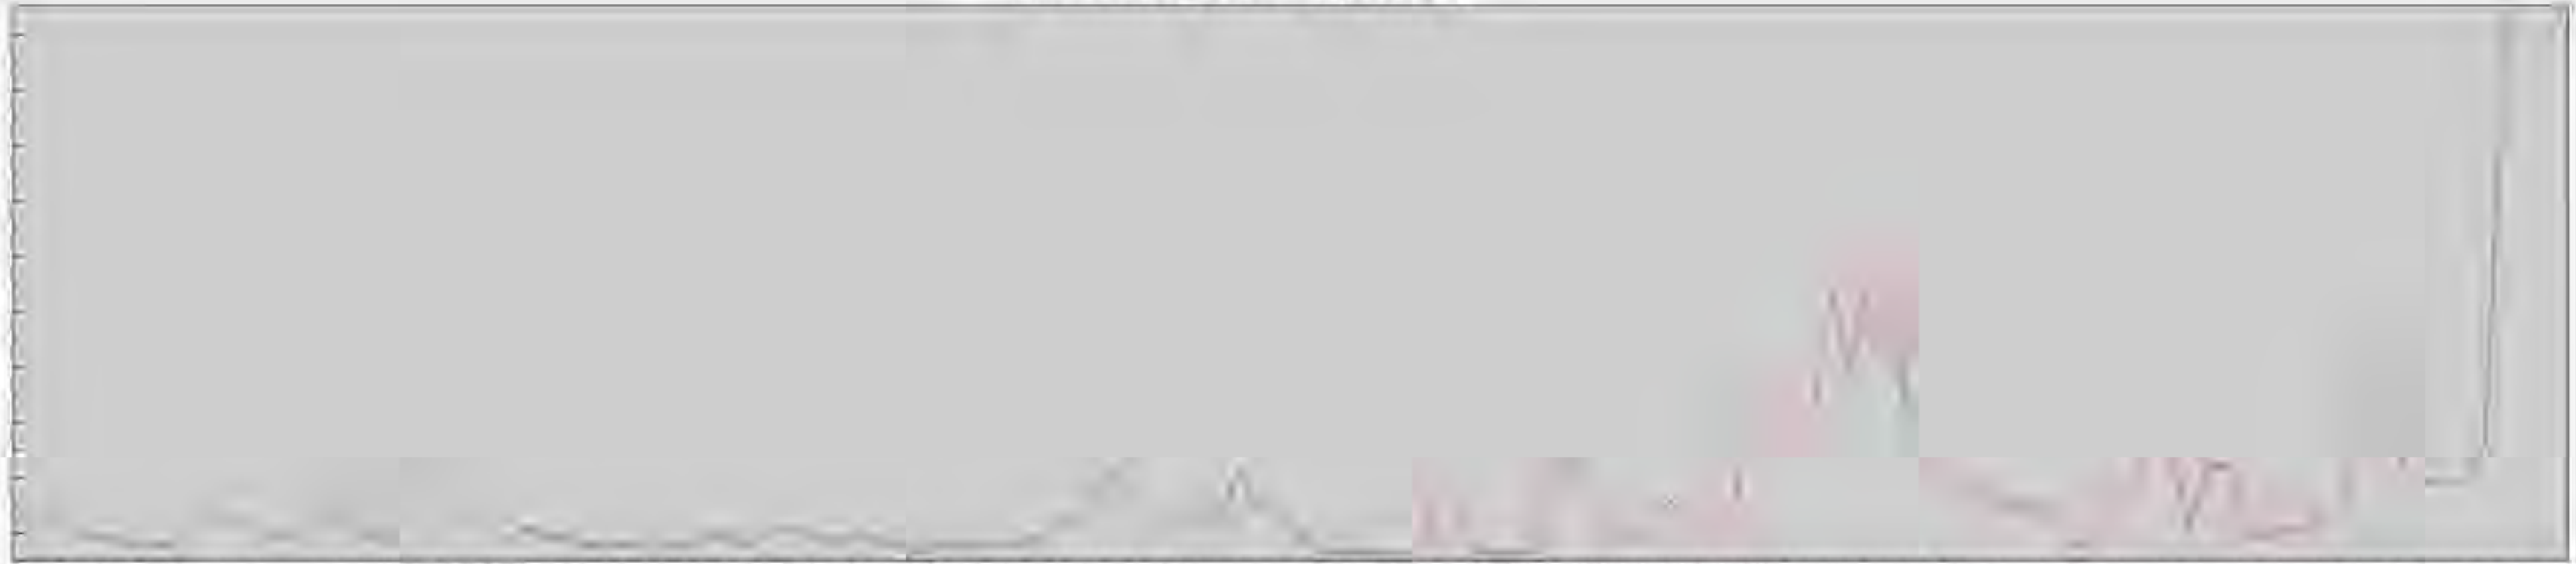

130-NALT GSM289411 CEL  
129-NALT GSM289410 CEL  
128-NALT GSM289409 CEL  
127-NALT GSM289408 CEL  
126-CD9 GSM1988105 CEL  
125-CD9 GSM1988104 CEL  
124-CD9 GSM1988103 CEL  
123-CD9 GSM1988102 CEL  
122-CD9 GSM1988101 CEL  
121-Intestine-large GSM258676 CEL  
120-Intestine-large GSM258675 CEL  
119-Intestine-small GSM258674 CEL  
118-Intestine-small GSM258673 CEL  
117-Lymph-nodes GSM258672 CEL  
116-Lymph-nodes GSM258671 CEL  
115-Spleen GSM258767 CEL  
114-Spleen GSM258766 CEL  
113-Neuro2a GSM258728 CEL  
112-Neuro2a GSM258727 CEL  
111-Astrocytes GSM241898 CEL  
110-mimb GSM258726 CEL  
109-mimb GSM258725 CEL  
108-MIMCD3 GSM258724 CEL  
107-MIMCD3 GSM258723 CEL  
106-Bruce4 GSM258665 CEL  
105-Bruce4 GSM258664 CEL  
104-C2C12 GSM258690 CEL  
103-C2C12 GSM258689 CEL  
102-NH3T3 GSM258739 CEL  
101-NH3T3 GSM258738 CEL  
100-3T3-L1 GSM258610 CEL  
99-3T3-L1 GSM258609 CEL  
98-10T12 GSM258632 CEL  
97-10T12 GSM258631 CEL  
96-Osteoblast-d21 GSM258740 CEL  
95-Osteoblast-d21 GSM258739 CEL  
94-Osteoblast-d14 GSM258738 CEL  
93-Osteoblast-d14 GSM258737 CEL  
92-Osteoblast-d5 GSM258742 CEL  
91-Osteoblast-d5 GSM258741 CEL  
90-Chondrocytes GSM266741 CEL  
89-Chondrocytes GSM266740 CEL  
88-Nat Helper cell GSM465594 CEL  
87-Nat Helper cell GSM465593 CEL  
86-TT cell GSM465596 CEL  
85-MS-1 GSM234692 CEL  
84-Lymph-endo-cells GSM143704 CEL  
83-PP-FDC GSM481977 CEL  
82-PP-FDC GSM481978 CEL  
81-PP-FDC GSM481976 CEL  
80-L-Y RMLNDCC003001 CEL  
79-L-Y RMLNDCC003001 CEL  
78-Follicular-Bcells GSM258664 CEL  
77-Follicular-Bcells GSM258663 CEL  
76-MZ-Bcell GSM258627 CEL  
75-MZ-Bcell GSM258627 CEL  
74-BAF3 GSM258620 CEL  
73-BAF3 GSM258619 CEL  
72-Tregs GSM258778 CEL  
71-Tregs GSM258777 CEL  
70-T-cells-CD8+ GSM258776 CEL  
69-T-cells-CD8+ GSM258774 CEL  
68-T-cells-CD4+ GSM258773 CEL  
67-T-cells-CD4+ GSM258773 CEL  
66-Thymocyte-DN GSM465595 CEL  
65-Osteoclasts GSM258743 CEL  
64-Osteoclasts GSM258743 CEL  
63-Microglia GSM258721 CEL  
62-Microglia GSM258721 CEL  
61-MM-PS-7h GSM258706 CEL  
60-MM-PS-7h GSM258706 CEL  
59-MM-PS-6h GSM258702 CEL  
58-MM-PS-6h GSM258702 CEL  
57-MM-LPS-6h GSM258699 CEL  
56-MM-LPS-6h GSM258699 CEL  
55-MM-LPS-6h GSM258694 CEL  
54-MM-LPS-6h GSM258694 CEL  
53-Plasmacytoid-DC GSM258650 CEL  
52-Plasmacytoid-DC GSM258649 CEL  
51-CD8a-DC GSM258648 CEL  
50-CD8a-DC GSM258647 CEL  
49-CD8a+DC GSM258646 CEL  
48-CD8a+DC GSM258646 CEL  
47-NK-cells GSM258732 CEL  
46-NK-cells GSM258732 CEL  
45-Mast-cells-IgE+Ad GSM258718 CEL  
44-Mast-cells-IgE+Ad GSM258717 CEL  
43-Mast-cells-IgE GSM258714 CEL  
42-Mast-cells-IgE GSM258713 CEL  
41-Mast-cells GSM258712 CEL  
40-Granulocytes GSM258668 CEL  
39-Granulocytes GSM258667 CEL  
38-GMP GSM258666 CEL  
37-GMP GSM258665 CEL  
36-GMP GSM258664 CEL  
35-CMP GSM258642 CEL  
34-CMP GSM258642 CEL  
33-MEP GSM258720 CEL  
32-MEP GSM258720 CEL  
31-HESC GSM258770 CEL  
30-HESC GSM258770 CEL  
29-Bone marrow GSM258628 CEL  
28-Bone marrow GSM258627 CEL  
27-paneth-cells-GE GSM116358 CEL  
26-paneth-cells-GE GSM116357 CEL  
25-paneth-cells GSM116350 CEL  
24-paneth-cells GSM116359 CEL  
23-paneth-cells GSM318589 CEL  
22-paneth-cells GSM318590 CEL  
21-Colon-Crypt GSM480375 cel  
20-Colon-Crypt GSM480374 cel  
19-Colon-Vill GSM480363 cel  
18-Colon-Vill GSM480362 cel  
17-Colon-IEC-GE GSM349880 CEL  
16-Colon-IEC-GE GSM350375 CEL  
15-Ileum-IEC-TGF GSM350376 CEL  
14-Ileum-IEC GSM350371 CEL  
13-Small-intestine-epithelium RMINEP002001 CEL  
12-Small-intestine-epithelium RMINEP001001 CEL  
11-FAE-RMPYEP002001 CEL  
10-FAE-RMPYEP001001 CEL  
09-Ileum-IEC GSM190797 CEL  
08-Ileum-IEC GSM190796 CEL  
07-Ileum-IEC GSM190795 CEL  
06-CT-v-M-cells GSM190794 CEL  
05-CT-v-M-cells GSM190793 CEL  
04-PP-M-cells GSM190792 CEL  
03-PP-M-cells GSM190791 CEL  
02-PP-M-cells GSM190790 CEL  
01-PP-M-cells GSM190789 CEL



Cluster0300\_High in MS1, min6 and neuro2A cells (7 nodes)

470.3  
445.5  
420.8  
396  
371.3  
346.5  
321.8  
297  
272.3  
247.5  
222.8  
198  
173.3  
148.5  
123.8  
99  
74.3  
49.5  
24.8  
0

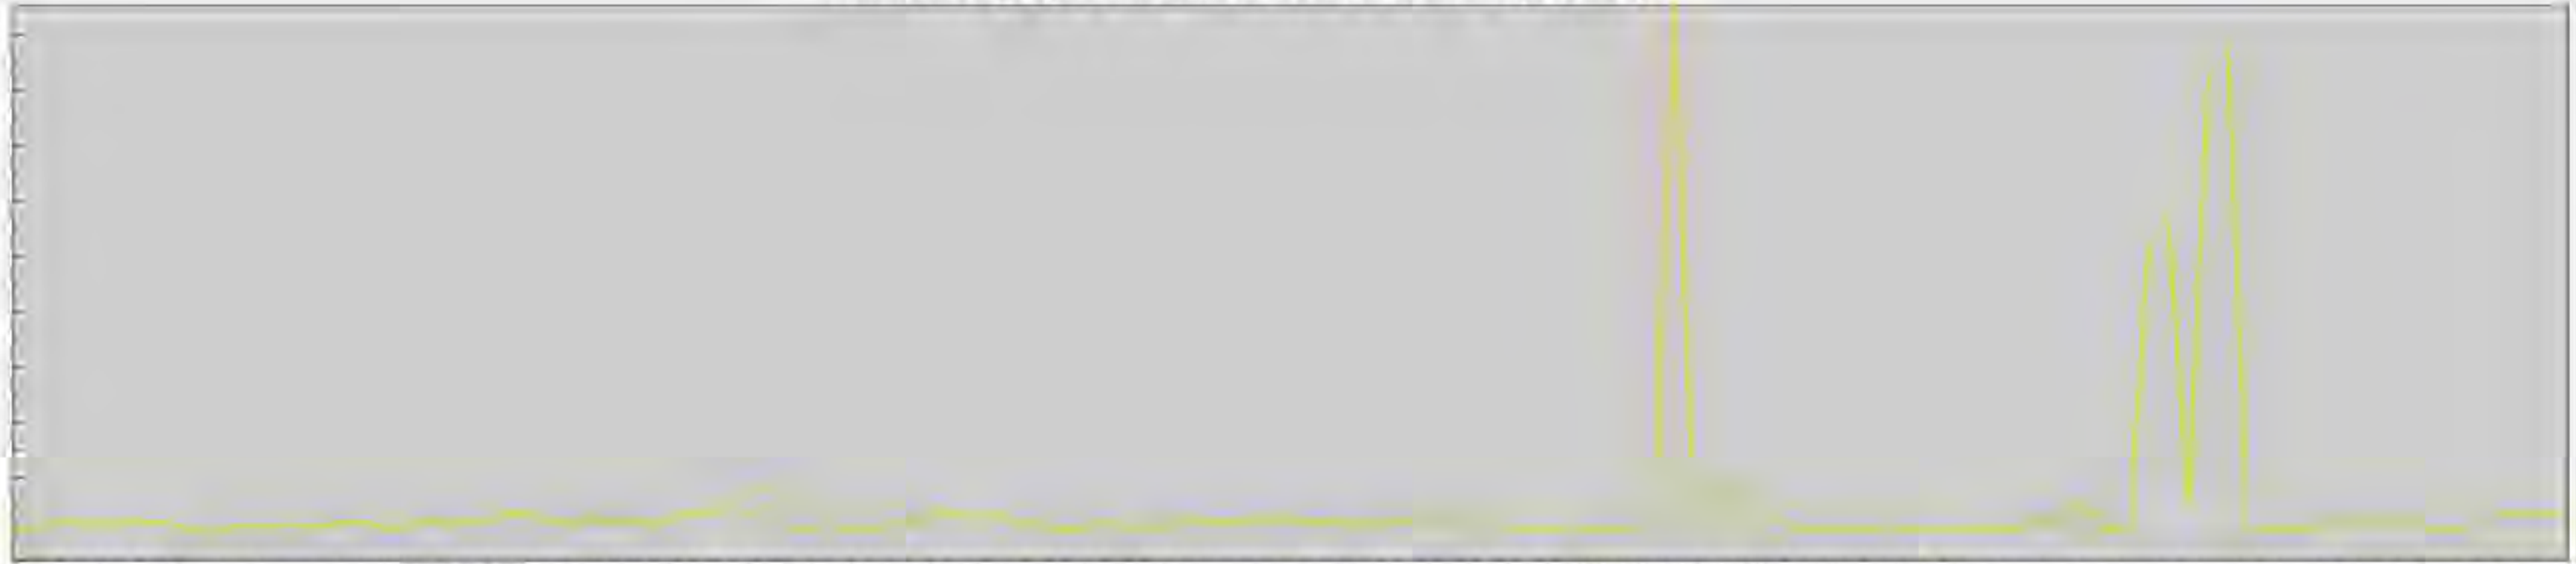

130-NALT GSM289411 CELL  
 129-NALT GSM289410 CELL  
 128-NALT GSM289409 CELL  
 127-NALT GSM289408 CELL  
 126-Colon-d9 GSM1988105 CELL  
 125-Colon-d9 GSM1988104 CELL  
 124-Colon-d9 GSM1988103 CELL  
 123-Colon-d4 GSM1988102 CELL  
 122-Colon-d4 GSM1988101 CELL  
 121-Intestine-large GSM258676 CELL  
 120-Intestine-large GSM258675 CELL  
 119-Intestine-small GSM258674 CELL  
 118-Intestine-small GSM258673 CELL  
 117-Lymph-nodes GSM258672 CELL  
 116-Lymph-nodes GSM258671 CELL  
 115-Spleen GSM258767 CELL  
 114-Spleen GSM258767 CELL  
 113-Neuro2a GSM258727 CELL  
 112-Neuro2a GSM258727 CELL  
 111-Astrocytes GSM241898 CELL  
 110-min6 GSM258726 CELL  
 109-min6 GSM258725 CELL  
 108-MIMCD3 GSM258724 CELL  
 107-MIMCD3 GSM258723 CELL  
 106-Bruce4 GSM258665 CELL  
 105-Bruce4 GSM258665 CELL  
 104-C2C12 GSM258690 CELL  
 103-C2C12 GSM258689 CELL  
 102-NH3T3 GSM258730 CELL  
 101-NH3T3 GSM258729 CELL  
 100-3T3-L1 GSM258610 CELL  
 99-3T3-L1 GSM258609 CELL  
 98-10T12 GSM258632 CELL  
 97-10T12 GSM258631 CELL  
 96-Osteoblast-d21 GSM258740 CELL  
 95-Osteoblast-d21 GSM258739 CELL  
 94-Osteoblast-d14 GSM258738 CELL  
 93-Osteoblast-d14 GSM258737 CELL  
 92-Osteoblast-d5 GSM258742 CELL  
 91-Osteoblast-d5 GSM258741 CELL  
 90-Chondrocytes GSM266741 CELL  
 89-Chondrocytes GSM266740 CELL  
 88-Nat Helper cell GSM465594 CELL  
 87-Nat Helper cell GSM465593 CELL  
 86-TT cell GSM465596 CELL  
 85-MS-1 GSM234692 CELL  
 84-Lymph-endo-cells GSM143704 CELL  
 83-P-FDC GSM481977 CELL  
 82-P-FDC GSM481978 CELL  
 81-P-FDC GSM481976 CELL  
 80-L-Y RMLNDCC003001 CELL  
 79-L-Y RMLNDCC003001 CELL  
 78-Follicular-Bcells GSM258664 CELL  
 77-Follicular-Bcells GSM258663 CELL  
 76-MZ-Bcell GSM258627 CELL  
 75-MZ-Bcell GSM258627 CELL  
 74-BAF3 GSM258620 CELL  
 73-BAF3 GSM258619 CELL  
 72-Tregs GSM258778 CELL  
 71-Tregs GSM258777 CELL  
 70-T-cells-CD8+ GSM258776 CELL  
 69-T-cells-CD8+ GSM258774 CELL  
 68-T-cells-CD4+ GSM258773 CELL  
 67-T-cells-CD4+ GSM258773 CELL  
 66-Thymocyte-DN GSM465595 CELL  
 65-Osteoclasts GSM258743 CELL  
 64-Osteoclasts GSM258743 CELL  
 63-Microglia GSM258721 CELL  
 62-Microglia GSM258721 CELL  
 61-MM-LPS-7h GSM258706 CELL  
 60-MM-LPS-7h GSM258706 CELL  
 59-MM-LPS-6h GSM258702 CELL  
 58-MM-LPS-6h GSM258702 CELL  
 57-MM-LPS-6h GSM258699 CELL  
 56-MM-LPS-6h GSM258699 CELL  
 55-MM-LPS-6h GSM258694 CELL  
 54-MM-LPS-6h GSM258694 CELL  
 53-Plasmacytoid-DC GSM258650 CELL  
 52-Plasmacytoid-DC GSM258649 CELL  
 51-CD8a-DC GSM258648 CELL  
 50-CD8a-DC GSM258647 CELL  
 49-CD8a+DC GSM258646 CELL  
 48-CD8a+DC GSM258646 CELL  
 47-NK-cells GSM258732 CELL  
 46-NK-cells GSM258732 CELL  
 45-Mast-cells-IgE+Ad GSM258719 CELL  
 44-Mast-cells-IgE+Ad GSM258717 CELL  
 43-Mast-cells-IgE GSM258714 CELL  
 42-Mast-cells-IgE GSM258713 CELL  
 41-Mast-cells GSM258712 CELL  
 40-Granulocytes GSM258668 CELL  
 39-Granulocytes GSM258667 CELL  
 38-GMP GSM258666 CELL  
 37-GMP GSM258665 CELL  
 36-GMP GSM258664 CELL  
 35-GMP GSM258642 CELL  
 34-MPEP GSM258872 CELL  
 33-MPEP GSM258871 CELL  
 32-MPEP GSM258871 CELL  
 31-HESC GSM258770 CELL  
 30-HESC GSM258770 CELL  
 29-Bone marrow GSM258628 CELL  
 28-Bone marrow GSM258627 CELL  
 27-paneth-cells-GF-1 GSM116358 CELL  
 26-paneth-cells-GF-1 GSM116357 CELL  
 25-paneth-cells GSM116350 CELL  
 24-paneth-cells GSM116359 CELL  
 23-paneth-cells GSM318589 CELL  
 22-paneth-cells GSM318590 CELL  
 21-Colon-Crypt GSM480375 cel  
 20-Colon-Crypt GSM480374 cel  
 19-Colon-Vill GSM480363 cel  
 18-Colon-Vill GSM480362 cel  
 17-Colon-IEC-GF GSM349880 CELL  
 16-Colon-IEC-GF GSM350375 CELL  
 15-Ileum-IEC-GF GSM350376 CELL  
 14-Ileum-IEC GSM350371 CELL  
 13-Small-intestine-epithelium RMINEP002001 CELL  
 12-Small-intestine-epithelium RMINEP001001 CELL  
 11-FAE-RMPYEP002001 CELL  
 10-FAE-RMPYEP001001 CELL  
 09-Ileum-IEC GSM190797 CELL  
 08-Ileum-IEC GSM190796 CELL  
 07-Ileum-IEC GSM190795 CELL  
 06-CT-v-M-cells GSM190794 CELL  
 05-CT-v-M-cells GSM190793 CELL  
 04-CT-v-M-cells GSM190792 CELL  
 03-PP-M-cells GSM190791 CELL  
 02-PP-M-cells GSM190790 CELL  
 01-PP-M-cells GSM190789 CELL



Cluster0301\_intestine-related (7 nodes)

2,760  
2,614.7  
2,469.4  
2,324.2  
2,178.9  
2,033.7  
1,888.4  
1,743.1  
1,597.9  
1,452.6  
1,307.4  
1,162.1  
1,016.8  
871.6  
728.3  
581  
435.8  
290.5  
145.3  
0

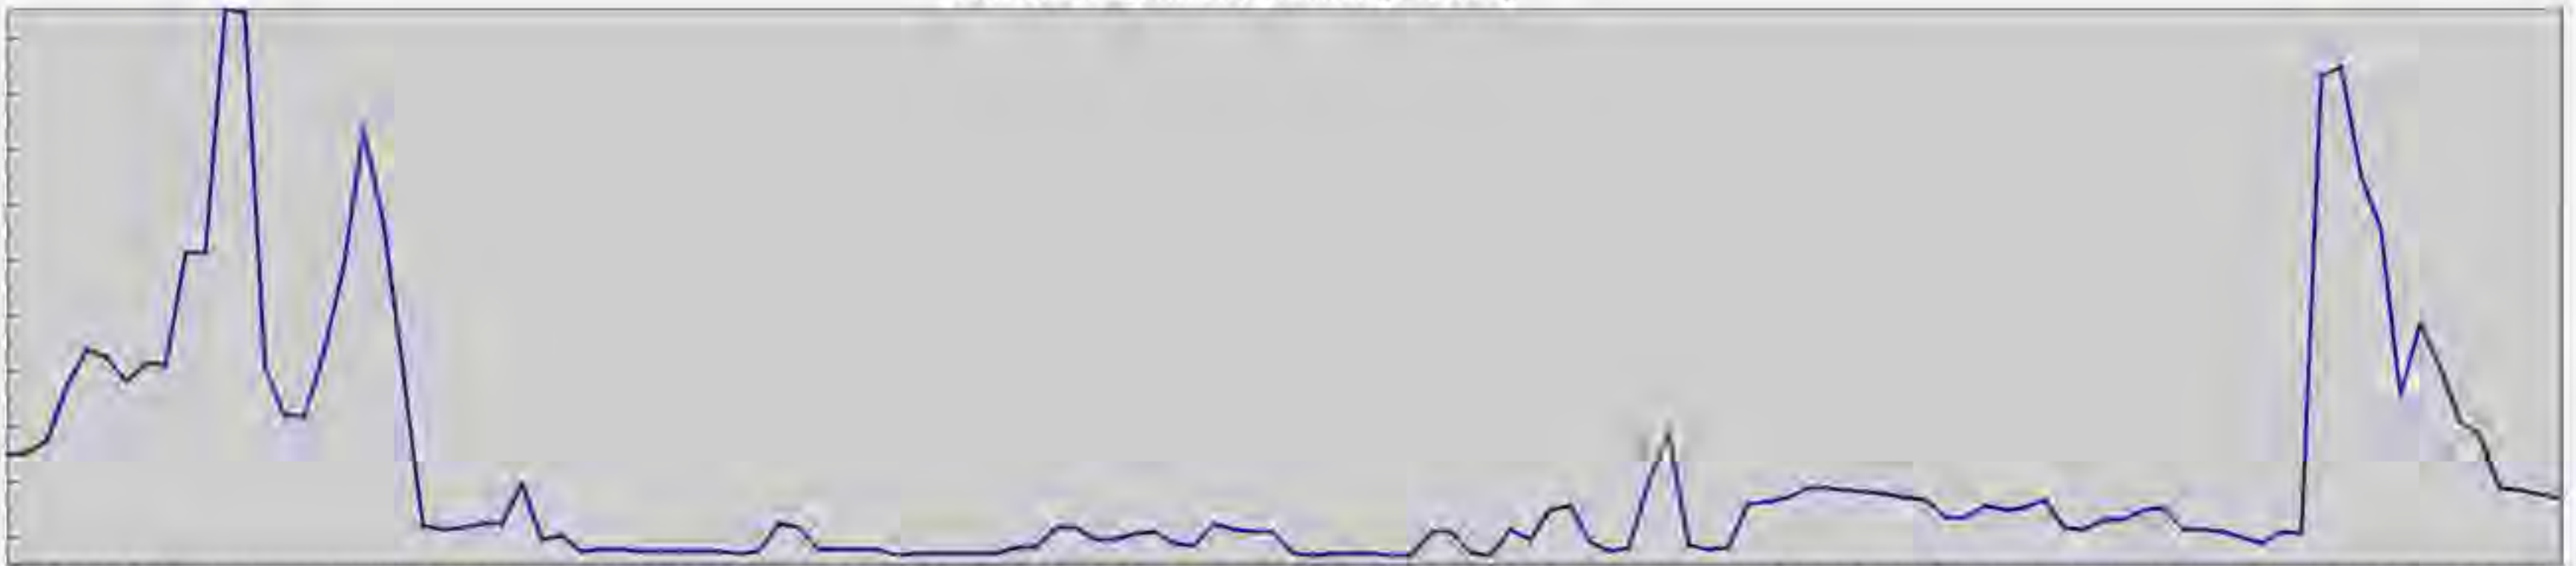

130- NALT GSM289411.CEL  
 129- NALT GSM289410.CEL  
 128- NALT GSM289409.CEL  
 127- NALT GSM289408.CEL  
 126- Colon-d9 GSM1988105.CEL  
 125- Colon-d9 GSM1988104.CEL  
 124- Colon-d9 GSM1988103.CEL  
 123- Colon-d4 GSM1988102.CEL  
 122- Colon-d4 GSM1988101.CEL  
 121- Intestine-large GSM258676.CEL  
 120- Intestine-large GSM258675.CEL  
 119- Intestine-small GSM258678.CEL  
 118- Intestine-small GSM258679.CEL  
 117- Lymph-nodes GSM258691.CEL  
 116- Lymph-nodes GSM258692.CEL  
 115- Spleen GSM258767.CEL  
 114- Spleen GSM258768.CEL  
 113- Neuro2a GSM258728.CEL  
 112- Neuro2a GSM258729.CEL  
 111- Astrocytes GSM241898.CEL  
 110- mimb GSM258726.CEL  
 109- mimb GSM258725.CEL  
 108- MIMCD3 GSM258724.CEL  
 107- MIMCD3 GSM258723.CEL  
 106- Bruce4 GSM258656.CEL  
 105- Bruce4 GSM258655.CEL  
 104- C2C12 GSM258690.CEL  
 103- C2C12 GSM258689.CEL  
 102- NIH3T3 GSM258730.CEL  
 101- NIH3T3 GSM258729.CEL  
 100- 3T3-L1 GSM258610.CEL  
 99- 3T3-L1 GSM258609.CEL  
 98- 10T1/2 GSM258632.CEL  
 97- 10T1/2 GSM258631.CEL  
 96- Osteoblast-d21 GSM258740.CEL  
 95- Osteoblast-d21 GSM258739.CEL  
 94- Osteoblast-d14 GSM258738.CEL  
 93- Osteoblast-d14 GSM258737.CEL  
 92- Osteoblast-d5 GSM258742.CEL  
 91- Osteoblast-d5 GSM258741.CEL  
 90- Chondrocytes GSM266741.CEL  
 89- Nat Helper cell GSM465594.CEL  
 88- Nat Helper cell GSM465593.CEL  
 87- T cell GSM465596.CEL  
 86- MS-1 GSM234692.CEL  
 85- Lymph-endo-cells GSM143704.CEL  
 84- P-PDC GSM481977.CEL  
 83- P-PDC GSM481978.CEL  
 82- P-PDC GSM481976.CEL  
 81- FLY RMLNDCC003001.CEL  
 80- FLY RMLNDCC003001.CEL  
 79- FLY RMLNDCC003001.CEL  
 78- Follicular-Bcells GSM258664.CEL  
 77- MZ-Bcell GSM258622.CEL  
 76- MZ-Bcell GSM258621.CEL  
 75- BAF3 GSM258620.CEL  
 74- BAF3 GSM258619.CEL  
 73- Tregs GSM258778.CEL  
 72- Tregs GSM258777.CEL  
 71- T-cells-CD8+ GSM258776.CEL  
 70- T-cells-CD8+ GSM258775.CEL  
 69- T-cells-CD4+ GSM258774.CEL  
 68- T-cells-CD4+ GSM258773.CEL  
 67- Thymocyte-DN GSM465595.CEL  
 66- Osteoclasts GSM258743.CEL  
 65- Microglia GSM258721.CEL  
 64- Microglia GSM258721.CEL  
 63- P-MM-LPS-7h GSM268706.CEL  
 62- P-MM-LPS-7h GSM268705.CEL  
 61- P-MM-LPS-7h GSM268702.CEL  
 60- P-MM-LPS-6h GSM258701.CEL  
 59- P-MM-LPS-6h GSM258700.CEL  
 58- P-MM-LPS-6h GSM258699.CEL  
 57- P-MM-LPS-6h GSM258699.CEL  
 56- P-MM-LPS-6h GSM258694.CEL  
 55- P-MM-LPS-6h GSM258694.CEL  
 54- P-MM-LPS-6h GSM258694.CEL  
 53- P-MM-LPS-6h GSM258694.CEL  
 52- P-MM-LPS-6h GSM258694.CEL  
 51- P-MM-LPS-6h GSM258694.CEL  
 50- CD8a-DC GSM258647.CEL  
 49- CD8a-DC GSM258646.CEL  
 48- CD8a+DC GSM258646.CEL  
 47- NK-cells GSM258732.CEL  
 46- NK-cells GSM258731.CEL  
 45- Mast-cells-IgE+Ad GSM258719.CEL  
 44- Mast-cells-IgE+Ad GSM258717.CEL  
 43- Mast-cells-IgE GSM258714.CEL  
 42- Mast-cells-IgE GSM258713.CEL  
 41- Mast-cells GSM258712.CEL  
 40- Granulocytes GSM258668.CEL  
 39- Granulocytes GSM258667.CEL  
 38- Granulocytes GSM258666.CEL  
 37- GMP GSM258665.CEL  
 36- GMP GSM258665.CEL  
 35- GMP GSM258664.CEL  
 34- MIEP GSM2588720.CEL  
 33- MIEP GSM2588719.CEL  
 32- HESC GSM258770.CEL  
 31- HESC GSM258769.CEL  
 30- Bone marrow GSM258628.CEL  
 29- Bone marrow GSM258627.CEL  
 28- Paneth-cells-GF GSM116358.CEL  
 27- Paneth-cells-GF GSM116357.CEL  
 26- Paneth-cells-GF GSM116350.CEL  
 25- Paneth-cells GSM116359.CEL  
 24- Paneth-cells GSM318589.CEL  
 23- Paneth-cells GSM318590.CEL  
 22- Paneth-cells GSM480375.CEL  
 21- Colon-Crypt GSM480374.CEL  
 20- Colon-Crypt GSM480363.CEL  
 19- Colon-Vill GSM480362.CEL  
 18- Colon-Vill GSM480362.CEL  
 17- Colon-IEC-GF GSM349880.CEL  
 16- Colon-IEC-GF GSM350375.CEL  
 15- Ileum-IEC-GF GSM350376.CEL  
 14- Ileum-IEC GSM350371.CEL  
 13- Small-intestine-epithelium RMINEP002001.CEL  
 12- Small-intestine-epithelium RMINEP001001.CEL  
 11- FAE-RMPYEP001001.CEL  
 10- FAE-RMPYEP001001.CEL  
 09- Ileum-IEC GSM190797.CEL  
 08- Ileum-IEC GSM190796.CEL  
 07- Ileum-IEC GSM190795.CEL  
 06- CT-v-M-cells GSM190794.CEL  
 05- CT-v-M-cells GSM190793.CEL  
 04- PP-M-cells GSM190792.CEL  
 03- PP-M-cells GSM190791.CEL  
 02- PP-M-cells GSM190790.CEL  
 01- PP-M-cells GSM190789.CEL



Cluster0302\_Uncertain-low in many (7 nodes)

133.7  
126.8  
119.6  
112.6  
105.5  
98.5  
91.5  
84.4  
77.4  
70.3  
63.3  
56.3  
49.2  
42.2  
35.2  
28.1  
21.1  
14.1  
7  
0

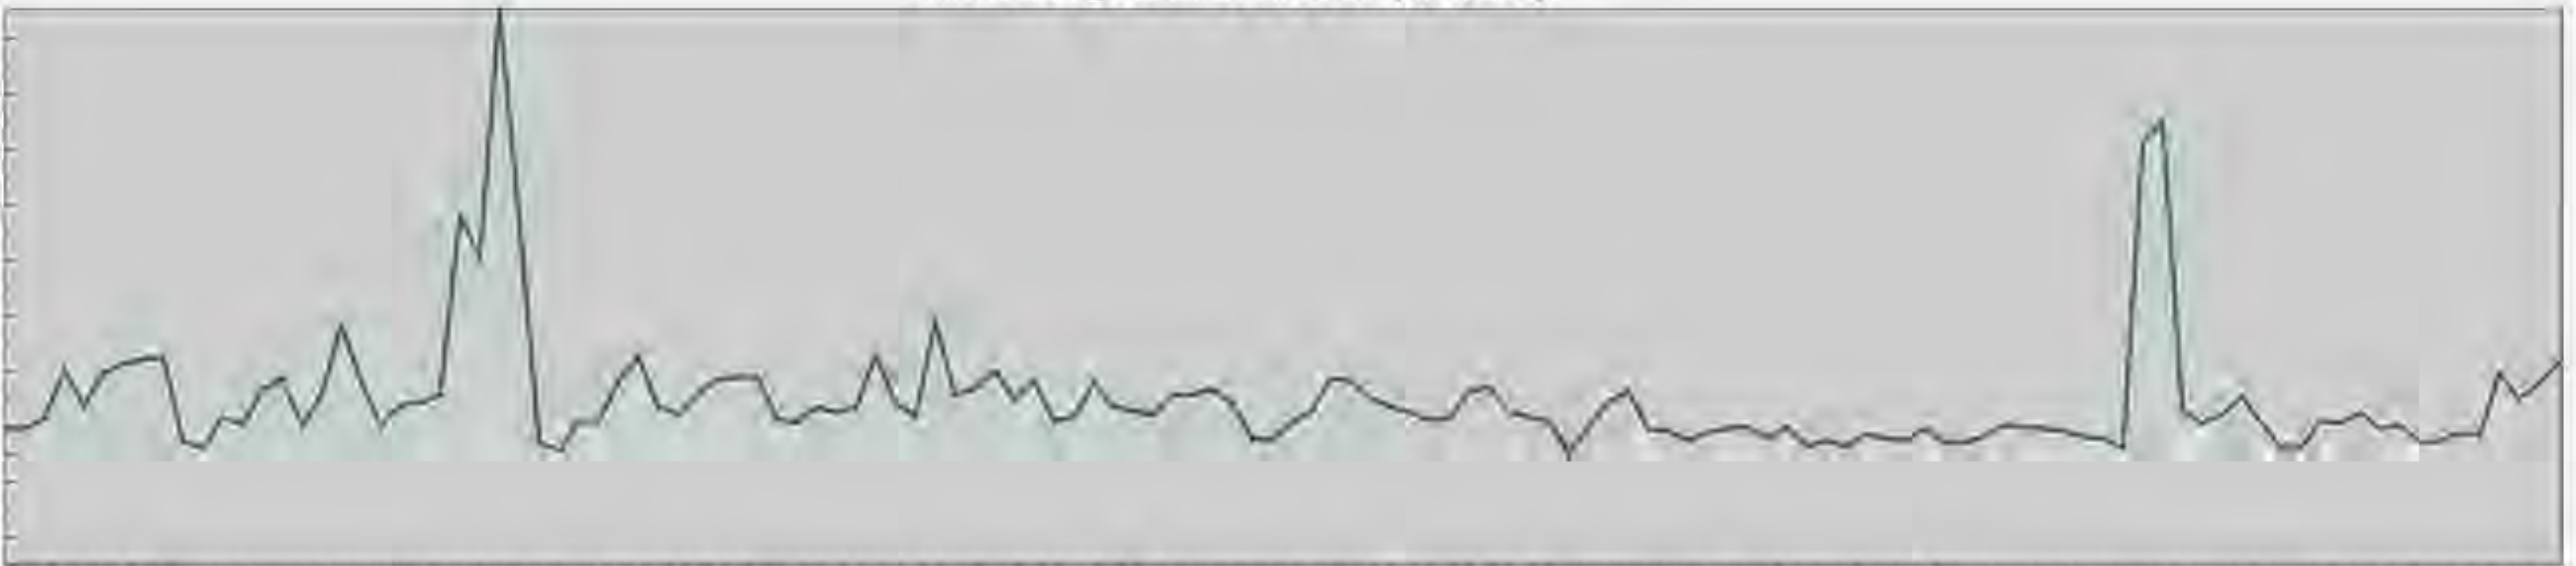

01-PP-M-cells\_GSM190789.CEL  
 02-PP-M-cells\_GSM190790.CEL  
 03-PP-M-cells\_GSM190791.CEL  
 04-CT-v-M-cells\_GSM190792.CEL  
 05-CT-v-M-cells\_GSM190793.CEL  
 06-CT-v-M-cells\_GSM190794.CEL  
 07-Ileum-IEC\_GSM190795.CEL  
 08-Ileum-IEC\_GSM190796.CEL  
 09-Ileum-IEC\_GSM190797.CEL  
 10-FAE-RMP-EP001001.CEL  
 11-FAE-RMP-EP002001.CEL  
 12-Small-intestine-epithelium\_RMINEP001001.CEL  
 13-Small-intestine-epithelium\_RMINEP002001.CEL  
 14-Ileum-IEC-GF\_GSM350371.CEL  
 15-Ileum-IEC-GF\_GSM350375.CEL  
 16-Colon-VIII\_GSM480362.CEL  
 17-Colon-VIII\_GSM480363.CEL  
 18-Colon-VIII\_GSM480364.CEL  
 19-Colon-VIII\_GSM480365.CEL  
 20-Colon-Crypt\_GSM480374.CEL  
 21-Colon-Crypt\_GSM480375.CEL  
 22-Paneth-cells\_GSM318589.CEL  
 23-Paneth-cells\_GSM318590.CEL  
 24-Paneth-cells\_GSM116350.CEL  
 25-Paneth-cells\_GSM116351.CEL  
 26-Paneth-cells-GF-1-GSM116357.CEL  
 27-Paneth-cells-GF-1-GSM116358.CEL  
 28-Paneth-cells-GF-1-GSM116359.CEL  
 29-Bone marrow\_GSM258627.CEL  
 30-HSC\_GSM258770.CEL  
 31-HSC\_GSM258771.CEL  
 32-MEP\_GSM258772.CEL  
 33-MEP\_GSM258773.CEL  
 34-MEP\_GSM258774.CEL  
 35-MEP\_GSM258775.CEL  
 36-MEP\_GSM258776.CEL  
 37-MEP\_GSM258777.CEL  
 38-Granulocytes\_GSM258667.CEL  
 39-Granulocytes\_GSM258668.CEL  
 40-Mast-cells\_GSM258712.CEL  
 41-Mast-cells\_GSM258713.CEL  
 42-Mast-cells-IdU+Ad-GSM258714.CEL  
 43-Mast-cells-IdU+Ad-GSM258715.CEL  
 44-Mast-cells-IdU+Ad-GSM258716.CEL  
 45-Mast-cells-IdU+Ad-GSM258717.CEL  
 46-NK-cells\_GSM258731.CEL  
 47-NK-cells\_GSM258732.CEL  
 48-CD8a+DC\_GSM258646.CEL  
 49-CD8a+DC\_GSM258647.CEL  
 50-CD8a+DC\_GSM258648.CEL  
 51-CD8a+DC\_GSM258649.CEL  
 52-CD8a+DC\_GSM258650.CEL  
 53-CD8a+DC\_GSM258651.CEL  
 54-CD8a+DC\_GSM258652.CEL  
 55-CD8a+DC\_GSM258653.CEL  
 56-CD8a+DC\_GSM258654.CEL  
 57-CD8a+DC\_GSM258655.CEL  
 58-CD8a+DC\_GSM258656.CEL  
 59-CD8a+DC\_GSM258657.CEL  
 60-CD8a+DC\_GSM258658.CEL  
 61-CD8a+DC\_GSM258659.CEL  
 62-Microglia\_GSM258721.CEL  
 63-Microglia\_GSM258722.CEL  
 64-Microglia\_GSM258723.CEL  
 65-Osteoclasts\_GSM258743.CEL  
 66-Thymocyte-DN\_GSM465595.CEL  
 67-T-cells-CD4+GSM258773.CEL  
 68-T-cells-CD4+GSM258774.CEL  
 69-T-cells-CD8+GSM258775.CEL  
 70-T-cells-CD8+GSM258776.CEL  
 71-Tregs\_GSM258777.CEL  
 72-Tregs\_GSM258778.CEL  
 73-Tregs\_GSM258779.CEL  
 74-BAF3\_GSM258620.CEL  
 75-BAF3\_GSM258621.CEL  
 76-MZ-Bcell\_GSM258622.CEL  
 77-Follicular-Bcells\_GSM258664.CEL  
 78-Follicular-Bcells\_GSM258665.CEL  
 79-F-LY-RMLNDC002001.CEL  
 80-F-LY-RMLNDC003001.CEL  
 81-PP-FDC\_GSM481976.CEL  
 82-PP-FDC\_GSM481977.CEL  
 83-PP-FDC\_GSM481978.CEL  
 84-Lymph-endo-cells\_GSM143704.CEL  
 85-MS-1\_GSM234692.CEL  
 86-LT-cell\_GSM465596.CEL  
 87-Nat Helper cell\_GSM465593.CEL  
 88-Nat Helper cell\_GSM465594.CEL  
 89-Chondrocytes\_GSM266741.CEL  
 90-Chondrocytes\_GSM266742.CEL  
 91-Osteoblast-d5\_GSM258741.CEL  
 92-Osteoblast-d5\_GSM258742.CEL  
 93-Osteoblast-d14\_GSM258737.CEL  
 94-Osteoblast-d14\_GSM258738.CEL  
 95-Osteoblast-d21\_GSM258740.CEL  
 96-Osteoblast-d21\_GSM258739.CEL  
 97-10T12\_GSM258631.CEL  
 98-10T12\_GSM258632.CEL  
 99-3T3-L1\_GSM258609.CEL  
 100-3T3-L1\_GSM258610.CEL  
 101-NH3T3\_GSM258729.CEL  
 102-NH3T3\_GSM258730.CEL  
 103-C2C12\_GSM258629.CEL  
 104-C2C12\_GSM258630.CEL  
 105-Bruce4\_GSM258656.CEL  
 106-Bruce4\_GSM258657.CEL  
 107-MIMCD3\_GSM258723.CEL  
 108-MIMCD3\_GSM258724.CEL  
 109-mim6\_GSM258725.CEL  
 110-mim6\_GSM258726.CEL  
 111-Astrocytes\_GSM241898.CEL  
 112-Astrocytes\_GSM241899.CEL  
 113-Spleen\_GSM258767.CEL  
 114-Spleen\_GSM258768.CEL  
 115-Spleen\_GSM258769.CEL  
 116-Lymph-nodes\_GSM258691.CEL  
 117-Lymph-nodes\_GSM258692.CEL  
 118-Intestine-small\_GSM258677.CEL  
 119-Intestine-small\_GSM258678.CEL  
 120-Intestine-large\_GSM258675.CEL  
 121-Intestine-large\_GSM258676.CEL  
 122-Colon-d4\_GSM198101.CEL  
 123-Colon-d4\_GSM198102.CEL  
 124-Colon-d9\_GSM198103.CEL  
 125-Colon-d9\_GSM198104.CEL  
 126-NALT\_GSM289408.CEL  
 127-NALT\_GSM289409.CEL  
 128-NALT\_GSM289410.CEL  
 129-NALT\_GSM289411.CEL



Cluster0303\_High in NK cells, T cells, LTi cells and NH cells (7 nodes)

823  
779.7  
736.4  
693.1  
649.8  
606.5  
563.1  
519.8  
476.5  
433.2  
389.9  
346.5  
303.2  
259.9  
216.6  
173.3  
130  
86.6  
43.3  
0

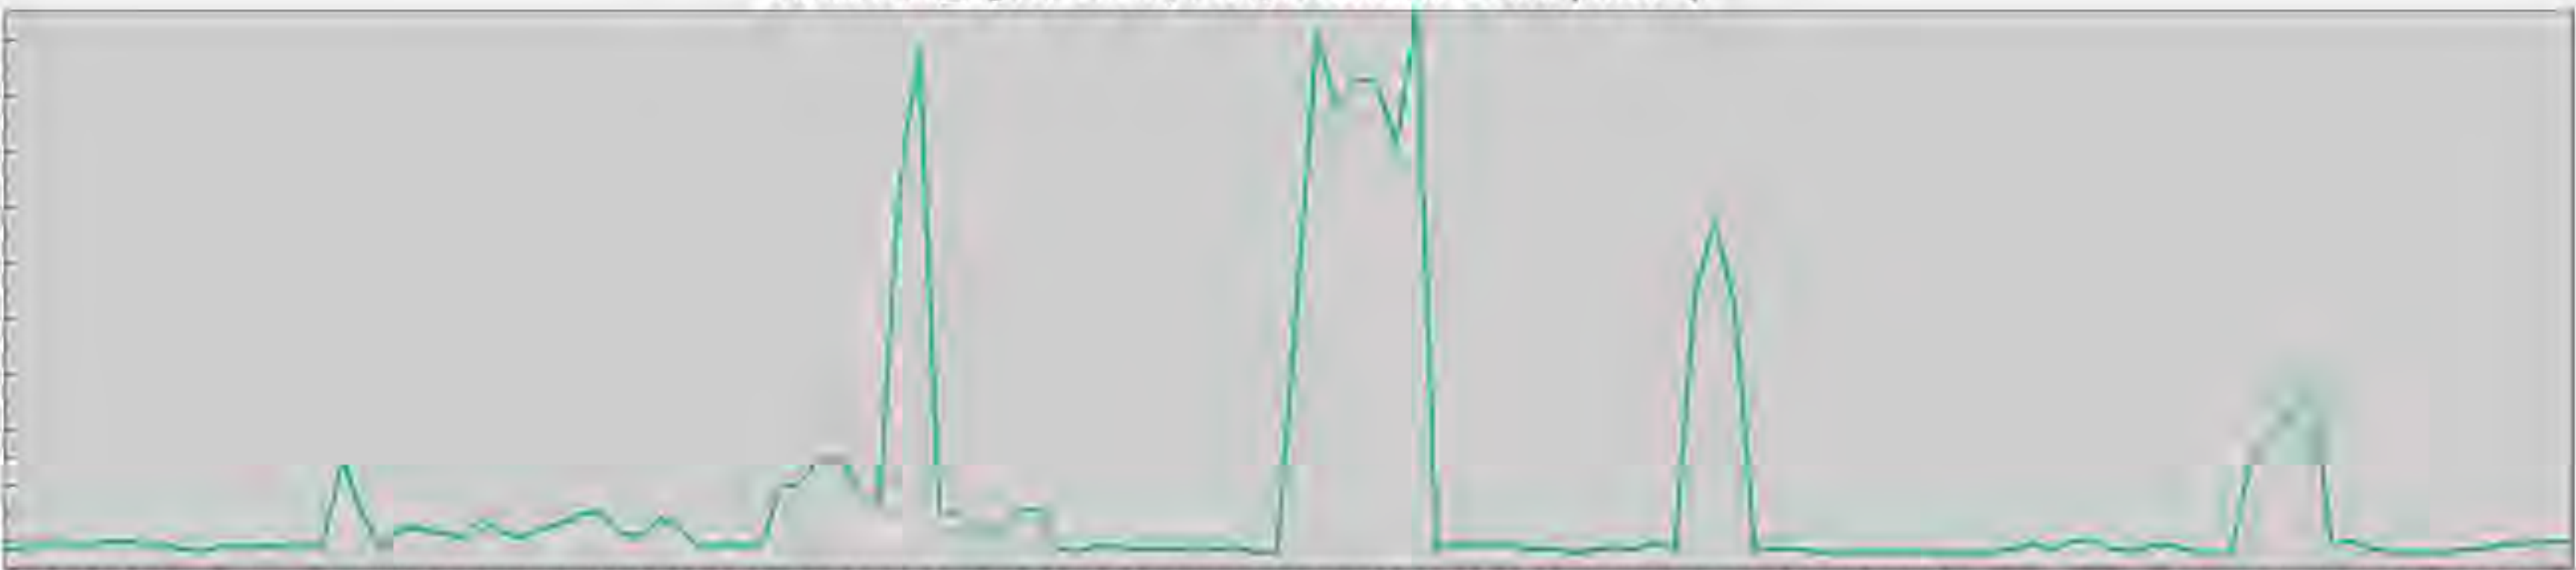

01- PP-M-cells\_GSM190789.CEL  
 02- PP-M-cells\_GSM190790.CEL  
 03- PP-M-cells\_GSM190791.CEL  
 04- CT-v-M-cells\_GSM190792.CEL  
 05- CT-v-M-cells\_GSM190793.CEL  
 06- CT-v-M-cells\_GSM190794.CEL  
 07- Ileum-IEC\_GSM190795.CEL  
 08- Ileum-IEC\_GSM190796.CEL  
 09- Ileum-IEC\_GSM190797.CEL  
 10- FAE-RMPYE001001.CEL  
 11- FAE-RMPYE002001.CEL  
 12- Small-intestine-epithelium\_RMINEP001001.CEL  
 13- Small-intestine-epithelium\_RMINEP002001.CEL  
 14- Ileum-IEC\_GSM350371.CEL  
 15- Ileum-IEC\_GSM350375.CEL  
 16- Colon-IEC-Gf\_GSM349880.CEL  
 17- Colon-IEC-Gf\_GSM350375.CEL  
 18- Colon-Vill-GSM480362.CEL  
 19- Colon-Vill-GSM480363.CEL  
 20- Colon-Crypt\_GSM480374.CEL  
 21- Colon-Crypt\_GSM480375.CEL  
 22- Paneth-cells\_GSM318590.CEL  
 23- Paneth-cells\_GSM318589.CEL  
 24- Paneth-cells\_GSM116359.CEL  
 25- Paneth-cells\_GSM116359.CEL  
 26- Paneth-cells-Gf-GSM116357.CEL  
 27- Paneth-cells-Gf-GSM116357.CEL  
 28- Bone marrow\_GSM258627.CEL  
 29- Bone marrow\_GSM116358.CEL  
 30- HSC\_GSM258770.CEL  
 31- HSC\_GSM258770.CEL  
 32- MIEP\_GSM258770.CEL  
 33- MIEP\_GSM258770.CEL  
 34- MIEP\_GSM258770.CEL  
 35- CMP\_GSM258642.CEL  
 36- CMP\_GSM258642.CEL  
 37- GMP\_GSM258666.CEL  
 38- GMP\_GSM258666.CEL  
 39- Granulocytes\_GSM258667.CEL  
 40- Mast-cells\_GSM258712.CEL  
 41- Mast-cells\_GSM258712.CEL  
 42- Mast-cells-IdU-GSM258713.CEL  
 43- Mast-cells-IdU-GSM258713.CEL  
 44- Mast-cells-IdU+Ad-GSM258718.CEL  
 45- Mast-cells-IdU+Ad-GSM258718.CEL  
 46- NK-cells\_GSM258732.CEL  
 47- NK-cells\_GSM258732.CEL  
 48- CD8a+DC\_GSM258646.CEL  
 49- CD8a+DC\_GSM258646.CEL  
 50- CD8a-DC\_GSM258647.CEL  
 51- CD8a-DC\_GSM258647.CEL  
 52- Plasmacytoid-DC\_GSM258650.CEL  
 53- Plasmacytoid-DC\_GSM258650.CEL  
 54- BM-M-PS-6h\_GSM258694.CEL  
 55- BM-M-PS-6h\_GSM258694.CEL  
 56- BM-M-PS-6h\_GSM258699.CEL  
 57- BM-M-PS-6h\_GSM258699.CEL  
 58- MM-LPS-7h\_GSM258702.CEL  
 59- MM-LPS-7h\_GSM258702.CEL  
 60- MM-LPS-7h\_GSM258706.CEL  
 61- MM-LPS-7h\_GSM258706.CEL  
 62- Microglia\_GSM258721.CEL  
 63- Microglia\_GSM258721.CEL  
 64- Osteoclasts\_GSM258743.CEL  
 65- Osteoclasts\_GSM258744.CEL  
 66- Thymocyte-DN\_GSM465595.CEL  
 67- T-cells-CD4+GSM258773.CEL  
 68- T-cells-CD4+GSM258773.CEL  
 69- T-cells-CD8+GSM258776.CEL  
 70- T-cells-CD8+GSM258776.CEL  
 71- Tregs\_GSM258778.CEL  
 72- Tregs\_GSM258778.CEL  
 73- BAF3\_GSM258620.CEL  
 74- BAF3\_GSM258620.CEL  
 75- MZ-Bcell\_GSM258622.CEL  
 76- MZ-Bcell\_GSM258622.CEL  
 77- Follicular-Bcells\_GSM258664.CEL  
 78- Follicular-Bcells\_GSM258664.CEL  
 79- E-L-Y-RMLNDC002001.CEL  
 80- E-L-Y-RMLNDC003001.CEL  
 81- PP-FDC\_GSM481978.CEL  
 82- PP-FDC\_GSM481978.CEL  
 83- PP-FDC\_GSM481978.CEL  
 84- Lymph-endo-cells\_GSM143704.CEL  
 85- MS-1\_GSM234692.CEL  
 86- LT cell\_GSM465596.CEL  
 87- Nat Helper cell\_GSM465593.CEL  
 88- Nat Helper cell\_GSM465594.CEL  
 89- Chondrocytes\_GSM266741.CEL  
 90- Chondrocytes\_GSM266741.CEL  
 91- Osteoblast-d5\_GSM258741.CEL  
 92- Osteoblast-d5\_GSM258742.CEL  
 93- Osteoblast-d14\_GSM258737.CEL  
 94- Osteoblast-d14\_GSM258738.CEL  
 95- Osteoblast-d21\_GSM258740.CEL  
 96- Osteoblast-d21\_GSM258740.CEL  
 97- 10T12\_GSM258632.CEL  
 98- 10T12\_GSM258632.CEL  
 99- 3T3-L1\_GSM258609.CEL  
 100- 3T3-L1\_GSM258610.CEL  
 101- NIH3T3\_GSM258739.CEL  
 102- NIH3T3\_GSM258739.CEL  
 103- C2C12\_GSM258829.CEL  
 104- C2C12\_GSM258829.CEL  
 105- Bruce4\_GSM258866.CEL  
 106- Bruce4\_GSM258866.CEL  
 107- MIMCD3\_GSM258723.CEL  
 108- MIMCD3\_GSM258723.CEL  
 109- mimb\_GSM258725.CEL  
 110- mimb\_GSM258725.CEL  
 111- Astrocytes\_GSM241898.CEL  
 112- Astrocytes\_GSM241898.CEL  
 113- Spleen\_GSM258768.CEL  
 114- Spleen\_GSM258768.CEL  
 115- Spleen\_GSM258768.CEL  
 116- Lymph-nodes\_GSM258691.CEL  
 117- Lymph-nodes\_GSM258691.CEL  
 118- Intestine-small\_GSM258677.CEL  
 119- Intestine-small\_GSM258677.CEL  
 120- Intestine-large\_GSM258675.CEL  
 121- Intestine-large\_GSM258675.CEL  
 122- Colon-d4\_GSM198810.CEL  
 123- Colon-d4\_GSM198810.CEL  
 124- Colon-d9\_GSM198810.CEL  
 125- Colon-d9\_GSM198810.CEL  
 126- Colon-d9\_GSM198810.CEL  
 127- NALT\_GSM289408.CEL  
 128- NALT\_GSM289409.CEL  
 129- NALT\_GSM289410.CEL  
 130- NALT\_GSM289411.CEL



Cluster0304\_intestine-related (7 nodes)

1,031.8  
977.5  
923.2  
868.9  
814.6  
760.3  
706  
651.7  
597.4  
543.1  
488.7  
434.4  
380.1  
325.8  
271.5  
217.2  
162.9  
108.6  
54.3  
0

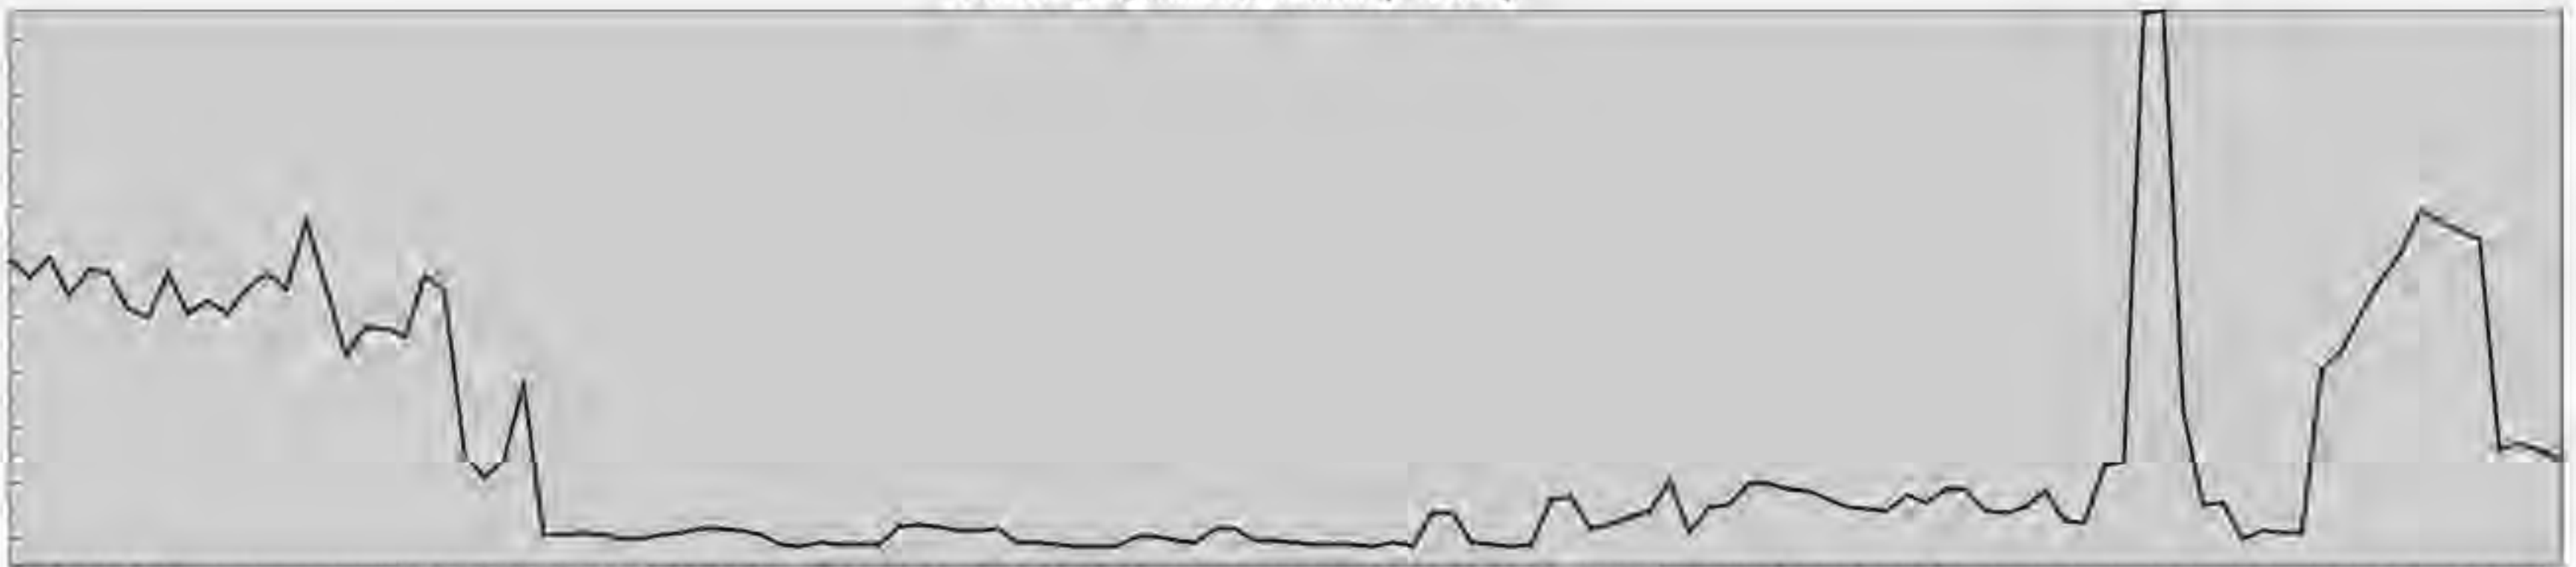

01-PP-M-cells\_GSM190789.CEL  
 02-PP-M-cells\_GSM190790.CEL  
 03-PP-M-cells\_GSM190791.CEL  
 04-CT-Y-M-cells\_GSM190792.CEL  
 05-CT-Y-M-cells\_GSM190793.CEL  
 06-CT-W-M-cells\_GSM190794.CEL  
 07-Ileum-IEC\_GSM190795.CEL  
 08-Ileum-IEC\_GSM190796.CEL  
 09-Ileum-IEC\_GSM190797.CEL  
 10-FAE-RMPYEP001001.CEL  
 11-FAE-RMPYEP002001.CEL  
 12-Small-intestine-epithelium\_RMINEP001001.CEL  
 13-Small-intestine-epithelium\_RMINEP002001.CEL  
 14-Ileum-IEC\_GSM350371.CEL  
 15-Ileum-IEC\_GSM350375.CEL  
 16-Colon-Vill-GSM480362.CEL  
 17-Colon-Vill-GSM480363.CEL  
 18-Colon-Vill-GSM480364.CEL  
 19-Colon-Vill-GSM480365.CEL  
 20-Colon-Crypt\_GSM480374.CEL  
 21-Colon-Crypt\_GSM480375.CEL  
 22-Paneth-cells\_GSM318589.CEL  
 23-Paneth-cells\_GSM318590.CEL  
 24-Paneth-cells\_GSM116350.CEL  
 25-Paneth-cells\_GSM116359.CEL  
 26-Paneth-cells\_GSM116357.CEL  
 27-Paneth-cells\_GSM116357.CEL  
 28-Paneth-cells\_GSM116357.CEL  
 29-Bone marrow\_GSM258727.CEL  
 30-HSC\_GSM258770.CEL  
 31-HSC\_GSM258771.CEL  
 32-MEP\_GSM258772.CEL  
 33-MEP\_GSM258773.CEL  
 34-MEP\_GSM258774.CEL  
 35-MEP\_GSM258775.CEL  
 36-MEP\_GSM258776.CEL  
 37-MEP\_GSM258777.CEL  
 38-MP\_GSM258778.CEL  
 39-MP\_GSM258779.CEL  
 40-Granulocytes\_GSM258780.CEL  
 41-Mast-cells\_GSM258781.CEL  
 42-Mast-cells\_GSM258782.CEL  
 43-Mast-cells-IdU+Ad-GSM258783.CEL  
 44-Mast-cells-IdU+Ad-GSM258784.CEL  
 45-Mast-cells-IdU+Ad-GSM258785.CEL  
 46-NK-cells\_GSM258786.CEL  
 47-NK-cells\_GSM258787.CEL  
 48-CD8a+DC\_GSM258788.CEL  
 49-CD8a+DC\_GSM258789.CEL  
 50-CD8a+DC\_GSM258790.CEL  
 51-CD8a+DC\_GSM258791.CEL  
 52-CD8a+DC\_GSM258792.CEL  
 53-CD8a+DC\_GSM258793.CEL  
 54-CD8a+DC\_GSM258794.CEL  
 55-MM-LPS-6h\_GSM258795.CEL  
 56-MM-LPS-6h\_GSM258796.CEL  
 57-MM-LPS-6h\_GSM258797.CEL  
 58-MM-LPS-6h\_GSM258798.CEL  
 59-MM-LPS-6h\_GSM258799.CEL  
 60-MM-LPS-7h\_GSM258800.CEL  
 61-MM-LPS-7h\_GSM258801.CEL  
 62-MM-LPS-7h\_GSM258802.CEL  
 63-Microglia\_GSM258803.CEL  
 64-Microglia\_GSM258804.CEL  
 65-Osteoclasts\_GSM258805.CEL  
 66-Thymocyte-DN\_GSM465595.CEL  
 67-T-cells-CD4+GSM258773.CEL  
 68-T-cells-CD4+GSM258774.CEL  
 69-T-cells-CD8+GSM258775.CEL  
 70-T-cells-CD8+GSM258776.CEL  
 71-Tregs\_GSM258777.CEL  
 72-Tregs\_GSM258778.CEL  
 73-BAF3\_GSM258819.CEL  
 74-BAF3\_GSM258820.CEL  
 75-MZ-Bcell\_GSM258821.CEL  
 76-MZ-Bcell\_GSM258822.CEL  
 77-Follicular-Bcells\_GSM258864.CEL  
 78-Follicular-Bcells\_GSM258865.CEL  
 79-E-L-Y-RMLNDC002001.CEL  
 80-E-L-Y-RMLNDC003001.CEL  
 81-PP-FDC\_GSM481978.CEL  
 82-PP-FDC\_GSM481979.CEL  
 83-PP-FDC\_GSM481978.CEL  
 84-Lymph-endo-cells\_GSM143704.CEL  
 85-MS-1\_GSM234692.CEL  
 86-Nat Helper cell\_GSM465593.CEL  
 87-Nat Helper cell\_GSM465594.CEL  
 88-Chondrocytes\_GSM266741.CEL  
 89-Chondrocytes\_GSM266740.CEL  
 90-Osteoblast-d5\_GSM258741.CEL  
 91-Osteoblast-d5\_GSM258742.CEL  
 92-Osteoblast-d5\_GSM258743.CEL  
 93-Osteoblast-d14\_GSM258737.CEL  
 94-Osteoblast-d14\_GSM258738.CEL  
 95-Osteoblast-d21\_GSM258739.CEL  
 96-Osteoblast-d21\_GSM258740.CEL  
 97-10T1/2-GSM258632.CEL  
 98-10T1/2-GSM258631.CEL  
 99-3T3-L1\_GSM258610.CEL  
 100-3T3-L1\_GSM258609.CEL  
 101-NH3T3-GSM258739.CEL  
 102-NH3T3-GSM258739.CEL  
 103-C2C12\_GSM258829.CEL  
 104-C2C12\_GSM258830.CEL  
 105-Bruce4-GSM258865.CEL  
 106-Bruce4-GSM258866.CEL  
 107-MIMCD3\_GSM258723.CEL  
 108-MIMCD3\_GSM258724.CEL  
 109-mmp6\_GSM258725.CEL  
 110-mmp6\_GSM258726.CEL  
 111-Astrocytes\_GSM241898.CEL  
 112-Neuro2a\_GSM258727.CEL  
 113-Spleen\_GSM258767.CEL  
 114-Spleen\_GSM258768.CEL  
 115-Lymph-nodes\_GSM258892.CEL  
 116-Lymph-nodes\_GSM258891.CEL  
 117-Lymph-nodes\_GSM258892.CEL  
 118-Intestine-small\_GSM258892.CEL  
 119-Intestine-small\_GSM258892.CEL  
 120-Intestine-large\_GSM258875.CEL  
 121-Intestine-large\_GSM258876.CEL  
 122-Intestine-large\_GSM258877.CEL  
 123-Colon-d4\_GSM198810.CEL  
 124-Colon-d4\_GSM198811.CEL  
 125-Colon-d9\_GSM198812.CEL  
 126-Colon-d9\_GSM198813.CEL  
 127-NALT\_GSM289408.CEL  
 128-NALT\_GSM289409.CEL  
 129-NALT\_GSM289410.CEL  
 130-NALT\_GSM289411.CEL



Cluster0305\_Uncertain (7 nodes)

2,275.6  
 2,155.8  
 2,036.1  
 1,916.3  
 1,796.5  
 1,676.8  
 1,557  
 1,437.2  
 1,317.4  
 1,197.7  
 1,077.9  
 958.1  
 838.4  
 718.6  
 598.8  
 479.1  
 359.3  
 239.5  
 119.8  
 0

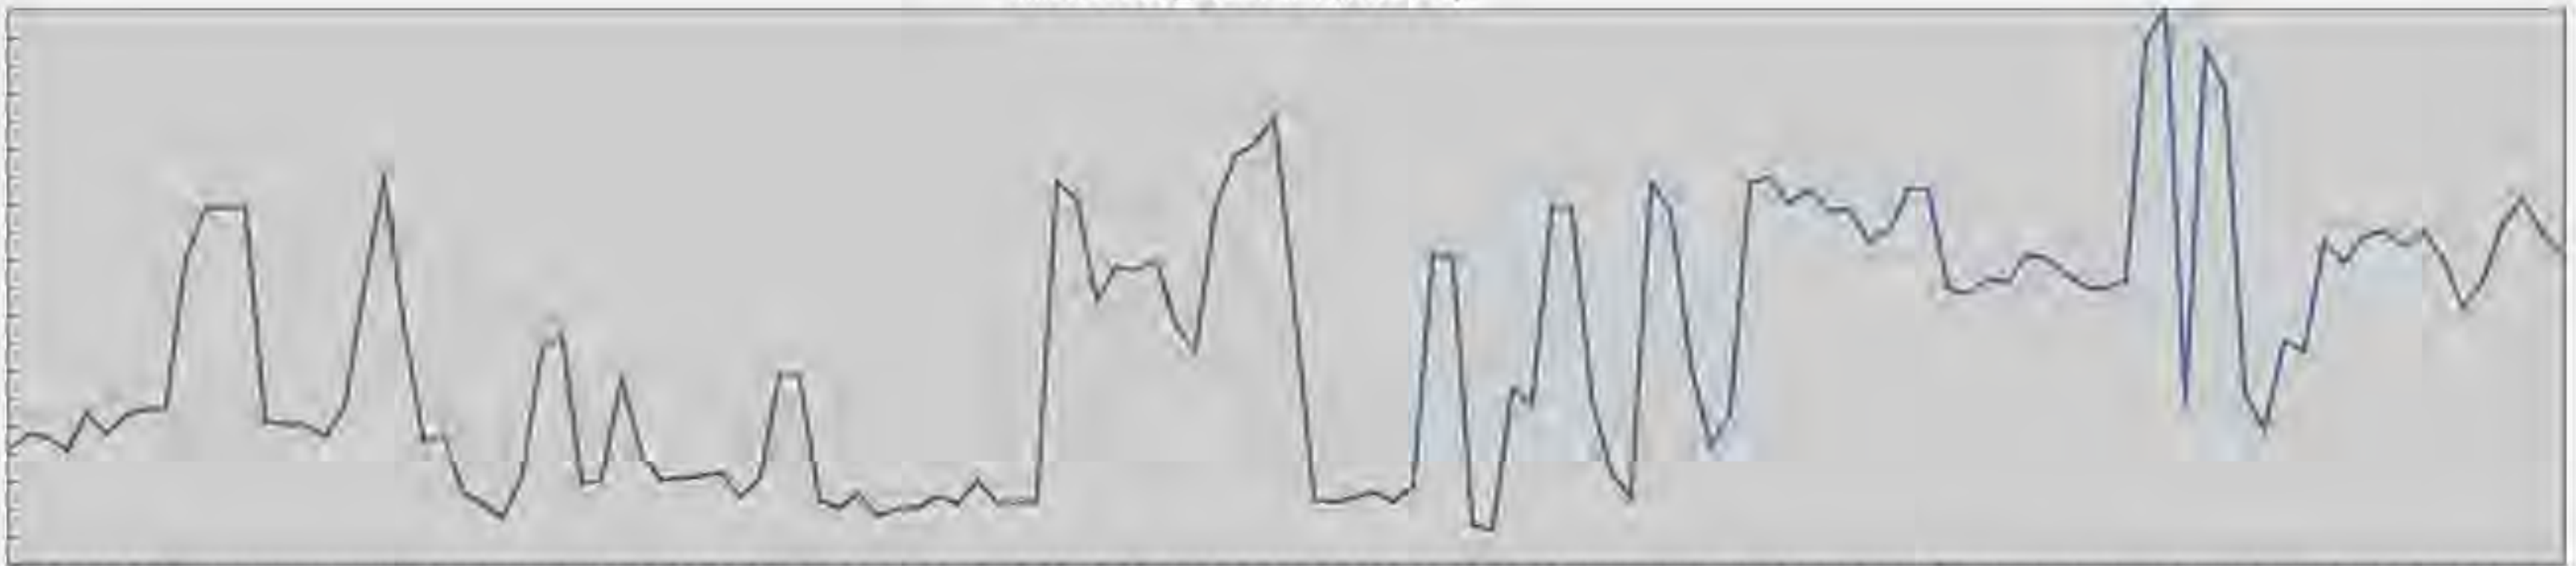

130- NALT GSM289411.CEL  
 129- NALT GSM289410.CEL  
 128- NALT GSM289409.CEL  
 127- NALT GSM289408.CEL  
 126- Colon-d9 GSM1988105.CEL  
 125- Colon-d9 GSM1988104.CEL  
 124- Colon-d9 GSM1988103.CEL  
 123- Colon-d4 GSM1988102.CEL  
 122- Colon-d4 GSM1988101.CEL  
 121- Intestine-large GSM258676.CEL  
 120- Intestine-large GSM258675.CEL  
 119- Intestine-small GSM258678.CEL  
 118- Intestine-small GSM258692.CEL  
 117- Lymph-nodes GSM258691.CEL  
 116- Lymph-nodes GSM258726.CEL  
 115- Spleen GSM258768.CEL  
 114- Spleen GSM258767.CEL  
 113- Neuro2a GSM258728.CEL  
 112- Neuro2a GSM258727.CEL  
 111- Astrocytes GSM241898.CEL  
 110- mimg GSM258725.CEL  
 109- mimg GSM258724.CEL  
 108- MIMCD3 GSM258723.CEL  
 107- MIMCD3 GSM258722.CEL  
 106- Bruce4 GSM258656.CEL  
 105- Bruce4 GSM258655.CEL  
 104- C2C12 GSM258690.CEL  
 103- C2C12 GSM258689.CEL  
 102- NIH3T3 GSM258730.CEL  
 101- NIH3T3 GSM258729.CEL  
 100- 3T3-L1 GSM258610.CEL  
 99- 3T3-L1 GSM258609.CEL  
 98- 10T12 GSM258632.CEL  
 97- 10T12 GSM258631.CEL  
 96- Osteoblast-d21 GSM258740.CEL  
 95- Osteoblast-d21 GSM258739.CEL  
 94- Osteoblast-d14 GSM258738.CEL  
 93- Osteoblast-d14 GSM258737.CEL  
 92- Osteoblast-d5 GSM258742.CEL  
 91- Osteoblast-d5 GSM258741.CEL  
 90- Chondrocytes GSM266741.CEL  
 89- Chondrocytes GSM266740.CEL  
 88- Nat Helper cell GSM465594.CEL  
 87- Nat Helper cell GSM465593.CEL  
 86- Tt cell GSM465596.CEL  
 85- MS-1 GSM234692.CEL  
 84- Lymph-endg-cells GSM143704.CEL  
 83- PP-FDC GSM481977.CEL  
 82- PP-FDC GSM481978.CEL  
 81- PP-FDC GSM481976.CEL  
 80- FLY RMLNDCC003001.CEL  
 79- FLY RMLNDCC003001.CEL  
 78- Follicular-Bcells GSM258664.CEL  
 77- Follicular-Bcells GSM258663.CEL  
 76- MZ-Bcell GSM258622.CEL  
 75- MZ-Bcell GSM258621.CEL  
 74- BAF3 GSM258620.CEL  
 73- BAF3 GSM258619.CEL  
 72- Tregs GSM258778.CEL  
 71- Tregs GSM258777.CEL  
 70- T-cells-CD8+ GSM258776.CEL  
 69- T-cells-CD8+ GSM258775.CEL  
 68- T-cells-CD4+ GSM258774.CEL  
 67- T-cells-CD4+ GSM258773.CEL  
 66- Thymocyte-DN GSM465595.CEL  
 65- Osteoclasts GSM258744.CEL  
 64- Microglia GSM258721.CEL  
 63- Microglia GSM258721.CEL  
 62- PMM-LPS-7h GSM258706.CEL  
 61- PMM-LPS-7h GSM258705.CEL  
 60- PMM-LPS-6h GSM258702.CEL  
 59- PMM-LPS-6h GSM258701.CEL  
 58- BMM-LPS-6h GSM258699.CEL  
 57- BMM-LPS-6h GSM258699.CEL  
 56- BMM-LPS-6h GSM258699.CEL  
 55- BMM-LPS-6h GSM258699.CEL  
 54- BMM-LPS-6h GSM258699.CEL  
 53- BMM-LPS-6h GSM258699.CEL  
 52- BMM-LPS-6h GSM258699.CEL  
 51- BMM-LPS-6h GSM258699.CEL  
 50- CD8a-DC GSM258647.CEL  
 49- CD8a-DC GSM258647.CEL  
 48- CD8a+DC GSM258646.CEL  
 47- NK-cells GSM258732.CEL  
 46- NK-cells GSM258731.CEL  
 45- Mast-cells-IgE+Ad GSM258718.CEL  
 44- Mast-cells-IgE+Ad GSM258717.CEL  
 43- Mast-cells-IgE GSM258714.CEL  
 42- Mast-cells-IgE GSM258713.CEL  
 41- Mast-cells GSM258712.CEL  
 39- Granulocytes GSM258668.CEL  
 38- Granulocytes GSM258667.CEL  
 37- GMP GSM258666.CEL  
 36- GMP GSM258665.CEL  
 35- GMP GSM258664.CEL  
 34- GMP GSM258664.CEL  
 33- MIEP GSM258720.CEL  
 32- MIEP GSM258719.CEL  
 31- HSC GSM258770.CEL  
 30- HSC GSM258769.CEL  
 29- Bone marrow GSM258628.CEL  
 28- Bone marrow GSM258627.CEL  
 27- Paneth-cells-GF-1 GSM116358.CEL  
 26- Paneth-cells-GF-1 GSM116357.CEL  
 25- Paneth-cells GSM116350.CEL  
 24- Paneth-cells GSM116359.CEL  
 23- Paneth-cells GSM318589.CEL  
 22- Paneth-cells GSM318590.CEL  
 21- Colon-Crypt GSM480375.CEL  
 20- Colon-Crypt GSM480374.CEL  
 19- Colon-Vill GSM480363.CEL  
 18- Colon-Vill GSM480362.CEL  
 17- Colon-IEC-GF GSM349880.CEL  
 16- Colon-IEC-GF GSM350375.CEL  
 15- Ileum-IEC-GF GSM350376.CEL  
 14- Ileum-IEC GSM350371.CEL  
 13- Small-intestine-epithelium RMINEP002901.CEL  
 12- Small-intestine-epithelium RMINEP001001.CEL  
 11- FAE RMPYEP002001.CEL  
 10- FAE RMPYEP001001.CEL  
 09- Ileum-IEC GSM190797.CEL  
 08- Ileum-IEC GSM190796.CEL  
 07- Ileum-IEC GSM190795.CEL  
 06- CT-v-M-cells GSM190794.CEL  
 05- CT-v-M-cells GSM190793.CEL  
 04- CT-v-M-cells GSM190792.CEL  
 03- PP-M-cells GSM190791.CEL  
 02- PP-M-cells GSM190790.CEL  
 01- PP-M-cells GSM190789.CEL



Cluster0306\_intestine-related (7 nodes)

2,057.2  
1,948.9  
1,840.6  
1,732.4  
1,624.1  
1,515.8  
1,407.6  
1,299.3  
1,191  
1,082.7  
974.5  
866.2  
757.9  
649.6  
541.4  
433.1  
324.8  
216.5  
108.3  
0

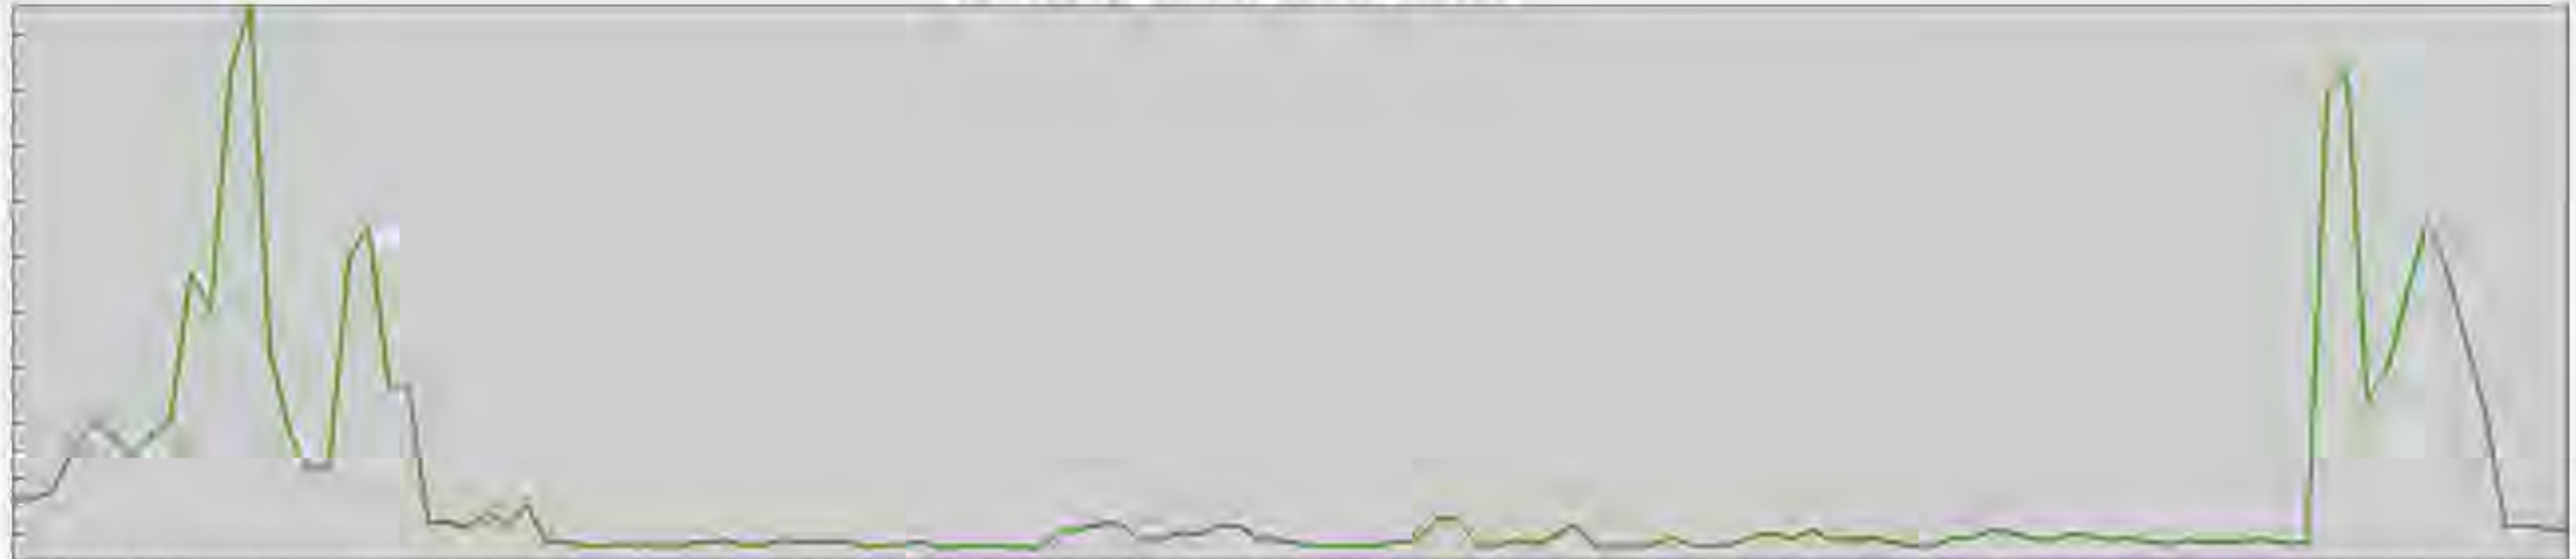

130- NALT GSM289411.CEL  
129- NALT GSM289410.CEL  
128- NALT GSM289409.CEL  
127- NALT GSM289408.CEL  
126- Colon-d9 GSM1988105.CEL  
125- Colon-d9 GSM1988104.CEL  
124- Colon-d9 GSM1988103.CEL  
123- Colon-d4 GSM1988102.CEL  
122- Colon-d4 GSM1988101.CEL  
121- Intestine-large GSM258676.CEL  
120- Intestine-large GSM258675.CEL  
119- Intestine-small GSM258674.CEL  
118- Intestine-small GSM258673.CEL  
117- Lymph-nodes GSM258672.CEL  
116- Lymph-nodes GSM258671.CEL  
115- Spleen GSM258767.CEL  
114- Spleen GSM258766.CEL  
113- Neuro2a GSM258728.CEL  
112- Neuro2a GSM258727.CEL  
111- Astrocytes GSM241898.CEL  
110- mimg GSM258726.CEL  
109- mimg GSM258725.CEL  
108- MIMCD3 GSM258724.CEL  
107- MIMCD3 GSM258723.CEL  
106- Bruce4 GSM258665.CEL  
105- Bruce4 GSM258664.CEL  
104- C2C12 GSM258690.CEL  
103- C2C12 GSM258689.CEL  
102- NIH3T3 GSM258739.CEL  
101- NIH3T3 GSM258738.CEL  
100- 3T3-L1 GSM258610.CEL  
99- 3T3-L1 GSM258609.CEL  
98- 10T12 GSM258632.CEL  
97- 10T12 GSM258631.CEL  
96- Osteoblast-d21 GSM258740.CEL  
95- Osteoblast-d21 GSM258739.CEL  
94- Osteoblast-d14 GSM258738.CEL  
93- Osteoblast-d14 GSM258737.CEL  
92- Osteoblast-d5 GSM258742.CEL  
91- Osteoblast-d5 GSM258741.CEL  
90- Chondrocytes GSM266741.CEL  
89- Nat Helper cell GSM266740.CEL  
88- Nat Helper cell GSM465594.CEL  
87- Nat Helper cell GSM465593.CEL  
86- T cell GSM465596.CEL  
85- MS-1 GSM234692.CEL  
84- Lymph-endo-cells GSM143704.CEL  
83- PP-FDC GSM481977.CEL  
82- PP-FDC GSM481978.CEL  
81- PP-FDC GSM481976.CEL  
80- FLY RMLNDCC003001.CEL  
79- FLY RMLNDCC003001.CEL  
78- Follicular-Bcells GSM258664.CEL  
77- Follicular-Bcells GSM258663.CEL  
76- MZ-Bcell GSM258627.CEL  
75- MZ-Bcell GSM258621.CEL  
74- BAF3 GSM258620.CEL  
73- BAF3 GSM258619.CEL  
72- Tregs GSM258778.CEL  
71- Tregs GSM258777.CEL  
70- T-cells-CD8+ GSM258776.CEL  
69- T-cells-CD8+ GSM258775.CEL  
68- T-cells-CD4+ GSM258774.CEL  
67- T-cells-CD4+ GSM258773.CEL  
66- Thymocyte-DN GSM465595.CEL  
65- Osteoclasts GSM258744.CEL  
64- Osteoclasts GSM258743.CEL  
63- Microglia GSM258721.CEL  
62- Microglia GSM258721.CEL  
61- PMM-PS-7h GSM268706.CEL  
60- PMM-PS-7h GSM268705.CEL  
59- PMM-GSM258702.CEL  
58- PMM-GSM258701.CEL  
57- BM-LPS-6h GSM258699.CEL  
56- BM-LPS-6h GSM258699.CEL  
55- BM-LPS-6h GSM258699.CEL  
54- BM-LPS-6h GSM258699.CEL  
53- Plasmacytoid-DC GSM258650.CEL  
52- CD8a-DC GSM258649.CEL  
51- CD8a-DC GSM258647.CEL  
50- CD8a-DC GSM258647.CEL  
49- CD8a+DC GSM258646.CEL  
48- CD8a+DC GSM258645.CEL  
47- NK-cells GSM258732.CEL  
46- NK-cells GSM258731.CEL  
45- Mast-cells-IgE+Ad GSM258718.CEL  
44- Mast-cells-IgE+Ad GSM258717.CEL  
43- Mast-cells-IgE GSM258714.CEL  
42- Mast-cells-IgE GSM258713.CEL  
41- Mast-cells GSM258712.CEL  
40- Granulocytes GSM258668.CEL  
39- Granulocytes GSM258667.CEL  
38- GMP GSM258666.CEL  
37- GMP GSM258665.CEL  
36- GMP GSM258664.CEL  
35- CMP GSM258642.CEL  
34- CMP GSM258641.CEL  
33- MIEP GSM258720.CEL  
32- MIEP GSM258719.CEL  
31- HESC GSM258770.CEL  
30- HESC GSM258769.CEL  
29- Bone marrow GSM258628.CEL  
28- Bone marrow GSM258627.CEL  
27- Paneth-cells-GF GSM116358.CEL  
26- Paneth-cells-GF GSM116357.CEL  
25- Paneth-cells GSM116350.CEL  
24- Paneth-cells GSM116359.CEL  
23- Paneth-cells GSM318589.CEL  
22- Paneth-cells GSM318590.CEL  
21- Colon-Crypt GSM480375.CEL  
20- Colon-Crypt GSM480374.CEL  
19- Colon-Vill GSM480363.CEL  
18- Colon-Vill GSM480362.CEL  
17- Colon-IEC-GF GSM349880.CEL  
16- Colon-IEC-GF GSM350375.CEL  
15- Ileum-IEC-GF GSM350376.CEL  
14- Ileum-IEC GSM350371.CEL  
13- Small-intestine-epithelium RMINEP002001.CEL  
12- Small-intestine-epithelium RMINEP001001.CEL  
11- FAE-RMPYEP001001.CEL  
10- FAE-RMPYEP001001.CEL  
09- Ileum-IEC GSM190797.CEL  
08- Ileum-IEC GSM190796.CEL  
07- Ileum-IEC GSM190795.CEL  
06- CT-v-M-cells GSM190794.CEL  
05- CT-v-M-cells GSM190793.CEL  
04- CT-v-M-cells GSM190792.CEL  
03- PP-M-cells GSM190791.CEL  
02- PP-M-cells GSM190790.CEL  
01- PP-M-cells GSM190789.CEL



Cluster0307\_Uncertain (7 nodes)

913  
864.9  
816.9  
768.8  
720.8  
672.7  
624.7  
576.6  
528.6  
480.5  
432.5  
384.4  
336.4  
288.3  
240.3  
192.2  
144.2  
96.1  
48.1  
0

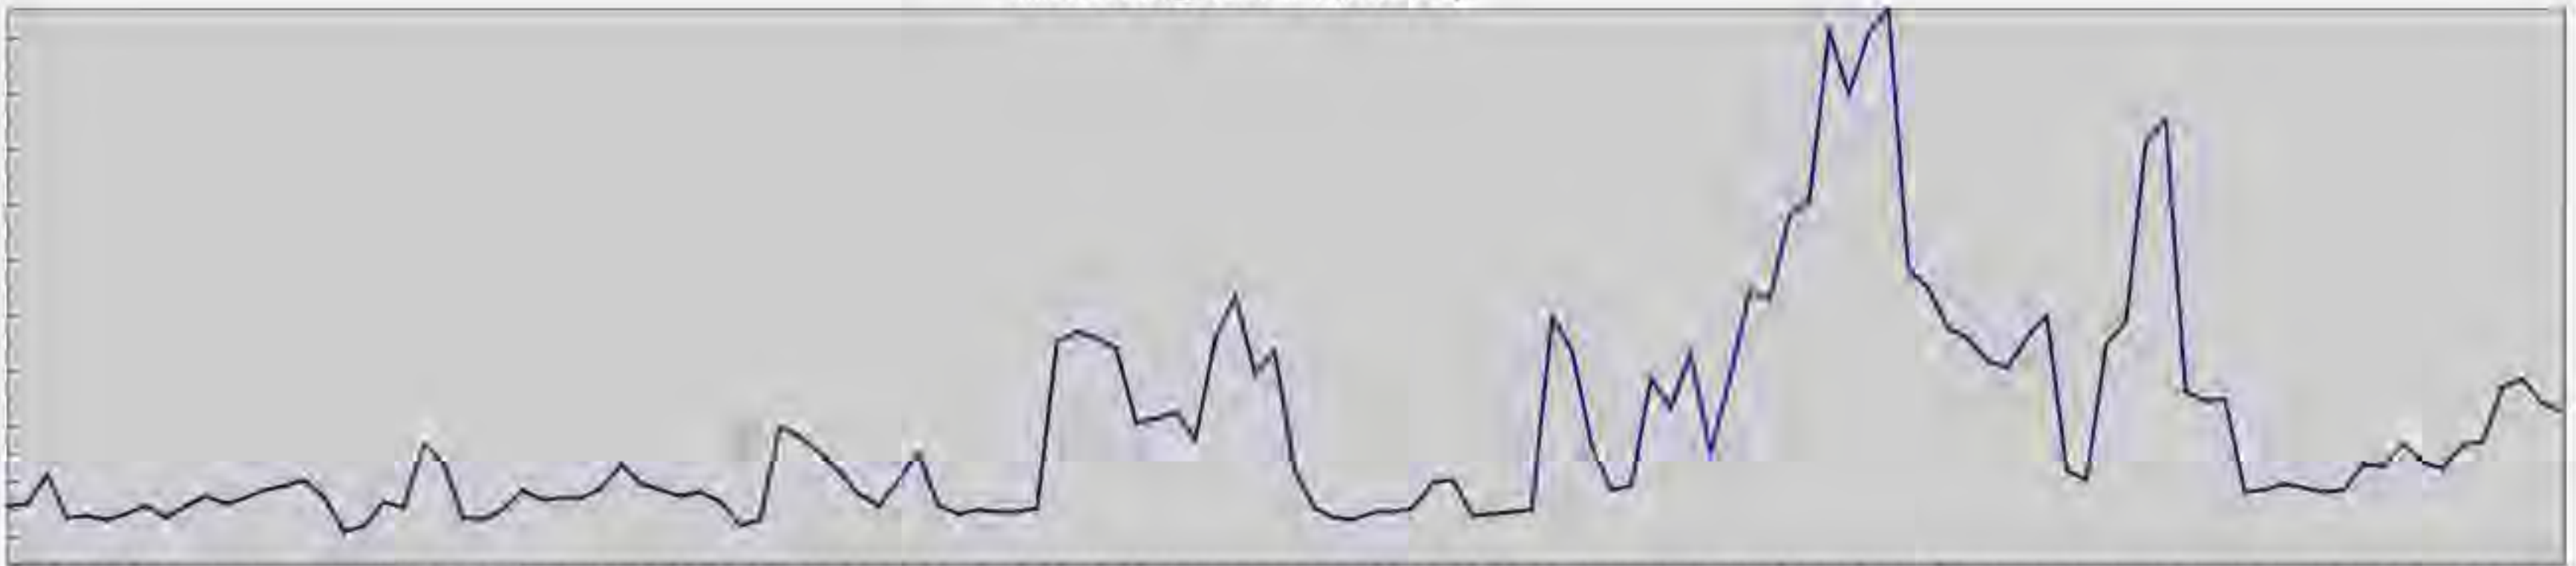

130-NALT GSM289411.CEL  
129-NALT GSM289410.CEL  
128-NALT GSM289409.CEL  
127-NALT GSM289408.CEL  
126-Column-d9 GSM1988105.CEL  
125-Column-d9 GSM1988104.CEL  
124-Column-d9 GSM1988103.CEL  
123-Column-d4 GSM1988102.CEL  
122-Column-d4 GSM1988101.CEL  
121-Intestine-large GSM258676.CEL  
120-Intestine-large GSM258675.CEL  
119-Intestine-small GSM258674.CEL  
118-Intestine-small GSM258673.CEL  
117-Lymph-nodes GSM258672.CEL  
116-Lymph-nodes GSM258671.CEL  
115-Spleen GSM258670.CEL  
114-Spleen GSM258669.CEL  
113-Neuro2a GSM258668.CEL  
112-Neuro2a GSM241898.CEL  
111-Astrocytes GSM241899.CEL  
110-ming GSM258726.CEL  
109-ming GSM258725.CEL  
108-MIMCD3 GSM258724.CEL  
107-MIMCD3 GSM258723.CEL  
106-Bruce4 GSM258665.CEL  
105-Bruce4 GSM258664.CEL  
104-C2C12 GSM258663.CEL  
103-C2C12 GSM258662.CEL  
102-NH3T3 GSM258739.CEL  
101-NH3T3 GSM258738.CEL  
100-3T3-L1 GSM258610.CEL  
99-3T3-L1 GSM258609.CEL  
98-10T12 GSM258632.CEL  
97-10T12 GSM258631.CEL  
96-Osteoblast-d21 GSM258740.CEL  
95-Osteoblast-d21 GSM258739.CEL  
94-Osteoblast-d14 GSM258738.CEL  
93-Osteoblast-d14 GSM258737.CEL  
92-Osteoblast-d5 GSM258742.CEL  
91-Osteoblast-d5 GSM258741.CEL  
90-Chondrocytes GSM266741.CEL  
89-Chondrocytes GSM266740.CEL  
88-Nat Helper cell GSM465594.CEL  
87-Nat Helper cell GSM465593.CEL  
86-LT cell GSM465596.CEL  
85-MS-1 GSM234692.CEL  
84-Lymph-endo-cells GSM143704.CEL  
83-Lymph-endo-cells GSM481977.CEL  
82-Lymph-endo-cells GSM481978.CEL  
81-Lymph-endo-cells GSM481979.CEL  
80-Lymph-endo-cells GSM481976.CEL  
79-Lymph-endo-cells GSM481977.CEL  
78-Lymph-endo-cells GSM481978.CEL  
77-Follicular-Bcells GSM258664.CEL  
76-Follicular-Bcells GSM258663.CEL  
75-MZ-Bcell GSM258622.CEL  
74-MZ-Bcell GSM258621.CEL  
73-BAF3 GSM258620.CEL  
72-BAF3 GSM258619.CEL  
71-Tregs GSM258778.CEL  
70-Tregs GSM258777.CEL  
69-T-cells-CD8+ GSM258776.CEL  
68-T-cells-CD8+ GSM258775.CEL  
67-T-cells-CD4+ GSM258774.CEL  
66-T-cells-CD4+ GSM258773.CEL  
65-Thymocyte-DN GSM465595.CEL  
64-Osteoclasts GSM258743.CEL  
63-Microglia GSM258721.CEL  
62-Microglia GSM258721.CEL  
61-PM-M-PS-7h GSM268706.CEL  
60-PM-M-PS-7h GSM268705.CEL  
59-PM-M-PS-6h GSM258702.CEL  
58-PM-M-PS-6h GSM258701.CEL  
57-PM-M-PS-6h GSM258699.CEL  
56-PM-M-PS-6h GSM258699.CEL  
55-PM-M-PS-6h GSM258699.CEL  
54-PM-M-PS-6h GSM258699.CEL  
53-PM-M-PS-6h GSM258699.CEL  
52-PM-M-PS-6h GSM258699.CEL  
51-PM-M-PS-6h GSM258699.CEL  
50-PM-M-PS-6h GSM258699.CEL  
49-PM-M-PS-6h GSM258699.CEL  
48-PM-M-PS-6h GSM258699.CEL  
47-NK-cells GSM258732.CEL  
46-NK-cells GSM258731.CEL  
45-Mast-cells-IgE+Ad GSM258718.CEL  
44-Mast-cells-IgE+Ad GSM258717.CEL  
43-Mast-cells-IgE GSM258714.CEL  
42-Mast-cells-IgE GSM258713.CEL  
41-Mast-cells-IgE GSM258712.CEL  
40-Mast-cells-IgE GSM258711.CEL  
39-Granulocytes GSM258668.CEL  
38-Granulocytes GSM258667.CEL  
37-GMP GSM258666.CEL  
36-GMP GSM258665.CEL  
35-GMP GSM258664.CEL  
34-GMP GSM258664.CEL  
33-MEP GSM258720.CEL  
32-MEP GSM258719.CEL  
31-MEP GSM258719.CEL  
30-HSC GSM258770.CEL  
29-Bone marrow GSM258628.CEL  
28-Bone marrow GSM258627.CEL  
27-Paneth-cells-GF GSM116358.CEL  
26-Paneth-cells-GF GSM116357.CEL  
25-Paneth-cells GSM116350.CEL  
24-Paneth-cells GSM116350.CEL  
23-Paneth-cells GSM318589.CEL  
22-Paneth-cells GSM318589.CEL  
21-Column-crypt GSM480375.CEL  
20-Column-crypt GSM480374.CEL  
19-Column-Vill GSM480363.CEL  
18-Column-Vill GSM480362.CEL  
17-Column-IEC-GF GSM349880.CEL  
16-Column-IEC-GF GSM350375.CEL  
15-Ileum-IEC-GF GSM350376.CEL  
14-Ileum-IEC GSM350371.CEL  
13-Small-intestine-epithelium RMINEP002001.CEL  
12-Small-intestine-epithelium RMINEP001001.CEL  
11-FAE-RMPYEP002001.CEL  
10-FAE-RMPYEP001001.CEL  
09-Ileum-IEC GSM190797.CEL  
08-Ileum-IEC GSM190796.CEL  
07-Ileum-IEC GSM190795.CEL  
06-CT-v-M-cells GSM190794.CEL  
05-CT-v-M-cells GSM190793.CEL  
04-CT-v-M-cells GSM190792.CEL  
03-PP-M-cells GSM190791.CEL  
02-PP-M-cells GSM190790.CEL  
01-PP-M-cells GSM190789.CEL



Cluster0308\_Uncertain-low in many (7 nodes)

116.3  
109.3  
103.2  
97.1  
91.1  
85  
78.9  
72.8  
66.8  
60.7  
54.6  
48.6  
42.5  
36.4  
30.4  
24.3  
18.2  
12.1  
6.1  
0

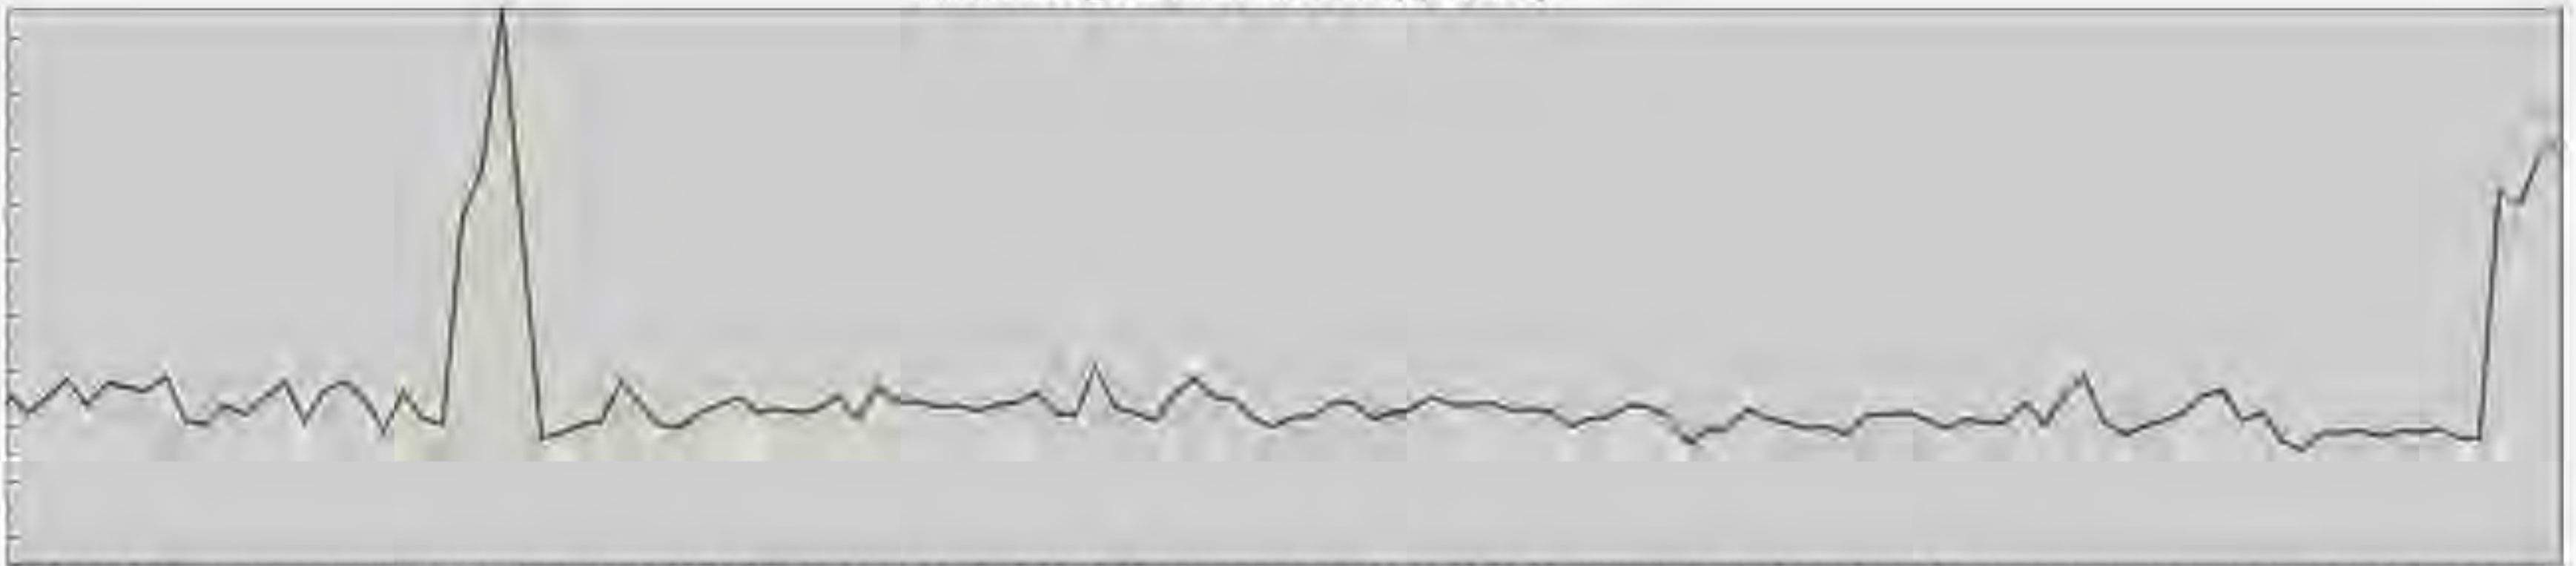

130-NALT GSM289411 CELL  
129-NALT GSM289410 CELL  
128-NALT GSM289409 CELL  
127-NALT GSM289408 CELL  
126-Paneth-cells GSM1988105 CELL  
125-Paneth-cells GSM1988104 CELL  
124-Paneth-cells GSM1988103 CELL  
123-Paneth-cells GSM1988102 CELL  
122-Colon-d4 GSM1988101 CELL  
121-Intestine-large GSM258676 CELL  
120-Intestine-large GSM258675 CELL  
119-Intestine-small GSM258674 CELL  
118-Intestine-small GSM258673 CELL  
117-Lymph-nodes GSM258672 CELL  
116-Spleen GSM258768 CELL  
115-Spleen GSM258767 CELL  
114-Neuro2a GSM258728 CELL  
113-Neuro2a GSM258727 CELL  
112-Astrocytes GSM241898 CELL  
111-mimb GSM258726 CELL  
110-mimb GSM258725 CELL  
109-mimb GSM258724 CELL  
108-MIMCD3 GSM258723 CELL  
107-MIMCD3 GSM258722 CELL  
106-Bruce4 GSM258656 CELL  
105-Bruce4 GSM258655 CELL  
104-C2C12 GSM258690 CELL  
103-C2C12 GSM258689 CELL  
102-NH3T3 GSM258739 CELL  
101-NH3T3 GSM258738 CELL  
100-3T3-L1 GSM258610 CELL  
99-3T3-L1 GSM258609 CELL  
98-10T12 GSM258632 CELL  
97-10T12 GSM258631 CELL  
96-Osteoblast-d21 GSM258740 CELL  
95-Osteoblast-d21 GSM258739 CELL  
94-Osteoblast-d14 GSM258738 CELL  
93-Osteoblast-d14 GSM258737 CELL  
92-Osteoblast-d5 GSM258742 CELL  
91-Osteoblast-d5 GSM258741 CELL  
90-Chondrocytes GSM266741 CELL  
89-Chondrocytes GSM266740 CELL  
88-Nat Helper cell GSM465594 CELL  
87-Nat Helper cell GSM465593 CELL  
86-TT cell GSM465596 CELL  
85-MS-1 GSM234692 CELL  
84-Lymph-endo-cells GSM143704 CELL  
83-P-FDC GSM481977 CELL  
82-P-FDC GSM481978 CELL  
81-P-FDC GSM481976 CELL  
80-L-Y RMLNDCC003001 CELL  
79-L-Y RMLNDCC003001 CELL  
78-Follicular-Bcells GSM258664 CELL  
77-Follicular-Bcells GSM258663 CELL  
76-MZ-Bcell GSM258622 CELL  
75-MZ-Bcell GSM258621 CELL  
74-BAF3 GSM258620 CELL  
73-BAF3 GSM258619 CELL  
72-Tregs GSM258778 CELL  
71-Tregs GSM258777 CELL  
70-T-cells CD8+ GSM258776 CELL  
69-T-cells CD8+ GSM258774 CELL  
68-T-cells CD4+ GSM258773 CELL  
67-T-cells CD4+ GSM258773 CELL  
66-Thymocyte-DN GSM465595 CELL  
65-Osteoclasts GSM258743 CELL  
64-Microglia GSM258721 CELL  
63-Microglia GSM258721 CELL  
62-MM-LPS-7h GSM268706 CELL  
61-MM-LPS-7h GSM268706 CELL  
60-MM-LPS-6h GSM268702 CELL  
59-MM-LPS-6h GSM268701 CELL  
58-MM-LPS-6h GSM268699 CELL  
57-MM-LPS-6h GSM268699 CELL  
56-MM-LPS-6h GSM268694 CELL  
55-Plasmacytoid-DC GSM258650 CELL  
54-Plasmacytoid-DC GSM258649 CELL  
53-CD8a-DC GSM258647 CELL  
52-CD8a-DC GSM258647 CELL  
51-CD8a+DC GSM258646 CELL  
50-CD8a+DC GSM258646 CELL  
49-NK-cells GSM258732 CELL  
48-NK-cells GSM258731 CELL  
47-Mast-cells-IgE+Ad GSM258719 CELL  
46-Mast-cells-IgE+Ad GSM258717 CELL  
45-Mast-cells-IgE GSM258714 CELL  
44-Mast-cells-IgE GSM258713 CELL  
43-Mast-cells-IgE GSM258712 CELL  
42-Mast-cells-IgE GSM258712 CELL  
41-Granulocytes GSM258667 CELL  
40-Granulocytes GSM258667 CELL  
39-GMP GSM258666 CELL  
38-GMP GSM258666 CELL  
37-GMP GSM258666 CELL  
36-GMP GSM258666 CELL  
35-GMP GSM258666 CELL  
34-GMP GSM258666 CELL  
33-MEP GSM258720 CELL  
32-MEP GSM258720 CELL  
31-HESC GSM258770 CELL  
30-HESC GSM258770 CELL  
29-Bone marrow GSM258628 CELL  
28-Bone marrow GSM258627 CELL  
27-Paneth-cells-GF-1 GSM116357 CELL  
26-Paneth-cells GSM116350 CELL  
25-Paneth-cells GSM116350 CELL  
24-Paneth-cells GSM116359 CELL  
23-Paneth-cells GSM318589 CELL  
22-Paneth-cells GSM318590 CELL  
21-Colon-Crypt GSM480375 cel  
20-Colon-Crypt GSM480374 cel  
19-Colon-Vill GSM480363 cel  
18-Colon-Vill GSM480362 cel  
17-Colon-IEC-GF GSM349880 CELL  
16-Colon-IEC-GF GSM350375 CELL  
15-Ileum-IEC GSM350376 CELL  
14-Ileum-IEC GSM350371 CELL  
13-Small-intestine-epithelium RMINEP002901 CELL  
12-Small-intestine-epithelium RMINEP001001 CELL  
11-FAE-RMPYEP002001 CELL  
10-FAE-RMPYEP001001 CELL  
09-Ileum-IEC GSM190797 CELL  
08-Ileum-IEC GSM190796 CELL  
07-Ileum-IEC GSM190795 CELL  
06-CT-w-M-cells GSM190794 CELL  
05-CT-w-M-cells GSM190793 CELL  
04-CT-y-M-cells GSM190792 CELL  
03-PP-M-cells GSM190790 CELL  
02-PP-M-cells GSM190789 CELL  
01-PP-M-cells GSM190789 CELL



Cluster0309\_Uncertain-low in many (7 nodes)

144.6  
137  
129.4  
121.8  
114.2  
106.6  
99  
91.3  
83.7  
76.1  
68.5  
60.9  
53.3  
45.7  
38.1  
30.4  
22.8  
15.2  
7.6  
0

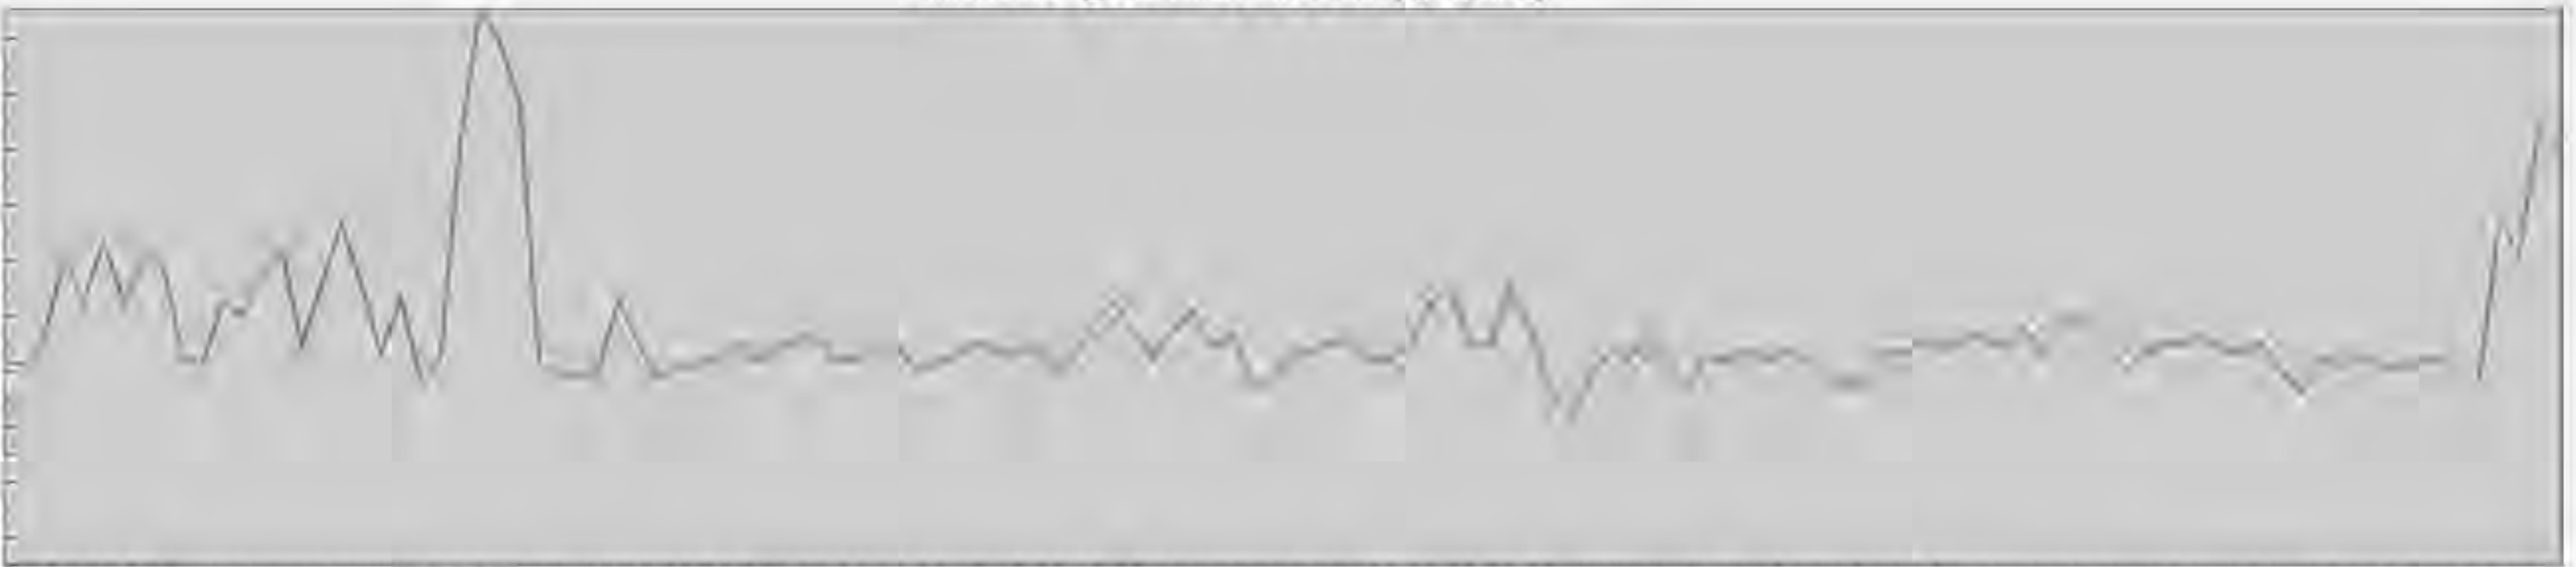

130-NALT GSM2899411 CELL  
 129-NALT GSM289410 CELL  
 128-NALT GSM289409 CELL  
 127-NALT GSM289408 CELL  
 126-paneth-cells GSM1988105 CELL  
 125-paneth-cells GSM1988104 CELL  
 124-paneth-cells GSM1988103 CELL  
 123-paneth-cells GSM1988102 CELL  
 122-paneth-cells GSM318589 CELL  
 121-paneth-cells GSM318590 CELL  
 120-paneth-cells GSM318591 CELL  
 119-paneth-cells GSM480375 CELL  
 118-paneth-cells GSM480374 CELL  
 117-paneth-cells GSM480363 CELL  
 116-paneth-cells GSM480362 CELL  
 115-paneth-cells GSM349880 CELL  
 114-paneth-cells GSM350375 CELL  
 113-paneth-cells GSM350376 CELL  
 112-paneth-cells GSM350377 CELL  
 111-paneth-cells GSM258677 CELL  
 110-paneth-cells GSM258678 CELL  
 109-paneth-cells GSM258679 CELL  
 108-paneth-cells GSM258680 CELL  
 107-paneth-cells GSM258681 CELL  
 106-paneth-cells GSM258682 CELL  
 105-paneth-cells GSM258683 CELL  
 104-paneth-cells GSM258684 CELL  
 103-paneth-cells GSM258685 CELL  
 102-paneth-cells GSM258686 CELL  
 101-paneth-cells GSM258687 CELL  
 100-paneth-cells GSM258688 CELL  
 99-paneth-cells GSM258689 CELL  
 98-paneth-cells GSM258690 CELL  
 97-paneth-cells GSM258691 CELL  
 96-paneth-cells GSM258692 CELL  
 95-paneth-cells GSM258693 CELL  
 94-paneth-cells GSM258694 CELL  
 93-paneth-cells GSM258695 CELL  
 92-paneth-cells GSM258696 CELL  
 91-paneth-cells GSM258697 CELL  
 90-paneth-cells GSM258698 CELL  
 89-paneth-cells GSM258699 CELL  
 88-paneth-cells GSM258700 CELL  
 87-paneth-cells GSM258701 CELL  
 86-paneth-cells GSM258702 CELL  
 85-paneth-cells GSM258703 CELL  
 84-paneth-cells GSM258704 CELL  
 83-paneth-cells GSM258705 CELL  
 82-paneth-cells GSM258706 CELL  
 81-paneth-cells GSM258707 CELL  
 80-paneth-cells GSM258708 CELL  
 79-paneth-cells GSM258709 CELL  
 78-paneth-cells GSM258710 CELL  
 77-paneth-cells GSM258711 CELL  
 76-paneth-cells GSM258712 CELL  
 75-paneth-cells GSM258713 CELL  
 74-paneth-cells GSM258714 CELL  
 73-paneth-cells GSM258715 CELL  
 72-paneth-cells GSM258716 CELL  
 71-paneth-cells GSM258717 CELL  
 70-paneth-cells GSM258718 CELL  
 69-paneth-cells GSM258719 CELL  
 68-paneth-cells GSM258720 CELL  
 67-paneth-cells GSM258721 CELL  
 66-paneth-cells GSM258722 CELL  
 65-paneth-cells GSM258723 CELL  
 64-paneth-cells GSM258724 CELL  
 63-paneth-cells GSM258725 CELL  
 62-paneth-cells GSM258726 CELL  
 61-paneth-cells GSM258727 CELL  
 60-paneth-cells GSM258728 CELL  
 59-paneth-cells GSM258729 CELL  
 58-paneth-cells GSM258730 CELL  
 57-paneth-cells GSM258731 CELL  
 56-paneth-cells GSM258732 CELL  
 55-paneth-cells GSM258733 CELL  
 54-paneth-cells GSM258734 CELL  
 53-paneth-cells GSM258735 CELL  
 52-paneth-cells GSM258736 CELL  
 51-paneth-cells GSM258737 CELL  
 50-paneth-cells GSM258738 CELL  
 49-paneth-cells GSM258739 CELL  
 48-paneth-cells GSM258740 CELL  
 47-paneth-cells GSM258741 CELL  
 46-paneth-cells GSM258742 CELL  
 45-paneth-cells GSM258743 CELL  
 44-paneth-cells GSM258744 CELL  
 43-paneth-cells GSM258745 CELL  
 42-paneth-cells GSM258746 CELL  
 41-paneth-cells GSM258747 CELL  
 40-paneth-cells GSM258748 CELL  
 39-paneth-cells GSM258749 CELL  
 38-paneth-cells GSM258750 CELL  
 37-paneth-cells GSM258751 CELL  
 36-paneth-cells GSM258752 CELL  
 35-paneth-cells GSM258753 CELL  
 34-paneth-cells GSM258754 CELL  
 33-paneth-cells GSM258755 CELL  
 32-paneth-cells GSM258756 CELL  
 31-paneth-cells GSM258757 CELL  
 30-paneth-cells GSM258758 CELL  
 29-paneth-cells GSM258759 CELL  
 28-paneth-cells GSM258760 CELL  
 27-paneth-cells GSM258761 CELL  
 26-paneth-cells GSM258762 CELL  
 25-paneth-cells GSM258763 CELL  
 24-paneth-cells GSM258764 CELL  
 23-paneth-cells GSM258765 CELL  
 22-paneth-cells GSM258766 CELL  
 21-paneth-cells GSM258767 CELL  
 20-paneth-cells GSM258768 CELL  
 19-paneth-cells GSM258769 CELL  
 18-paneth-cells GSM258770 CELL  
 17-paneth-cells GSM258771 CELL  
 16-paneth-cells GSM258772 CELL  
 15-paneth-cells GSM258773 CELL  
 14-paneth-cells GSM258774 CELL  
 13-paneth-cells GSM258775 CELL  
 12-paneth-cells GSM258776 CELL  
 11-paneth-cells GSM258777 CELL  
 10-paneth-cells GSM258778 CELL  
 9-paneth-cells GSM258779 CELL  
 8-paneth-cells GSM258780 CELL  
 7-paneth-cells GSM258781 CELL  
 6-paneth-cells GSM258782 CELL  
 5-paneth-cells GSM258783 CELL  
 4-paneth-cells GSM258784 CELL  
 3-paneth-cells GSM258785 CELL  
 2-paneth-cells GSM258786 CELL  
 1-paneth-cells GSM258787 CELL



Cluster0310\_Small intestine-related (7 nodes)

19 453.4  
 18 429.5  
 17 405.7  
 16 381.8  
 15 357.9  
 14 334.1  
 13 310.2  
 12 286.3  
 11 262.5  
 10 238.6  
 9 214.8  
 8 190.9  
 7 167  
 6 143.2  
 5 119.3  
 4 95.4  
 3 71.6  
 2 47.7  
 1 23.9  
 0

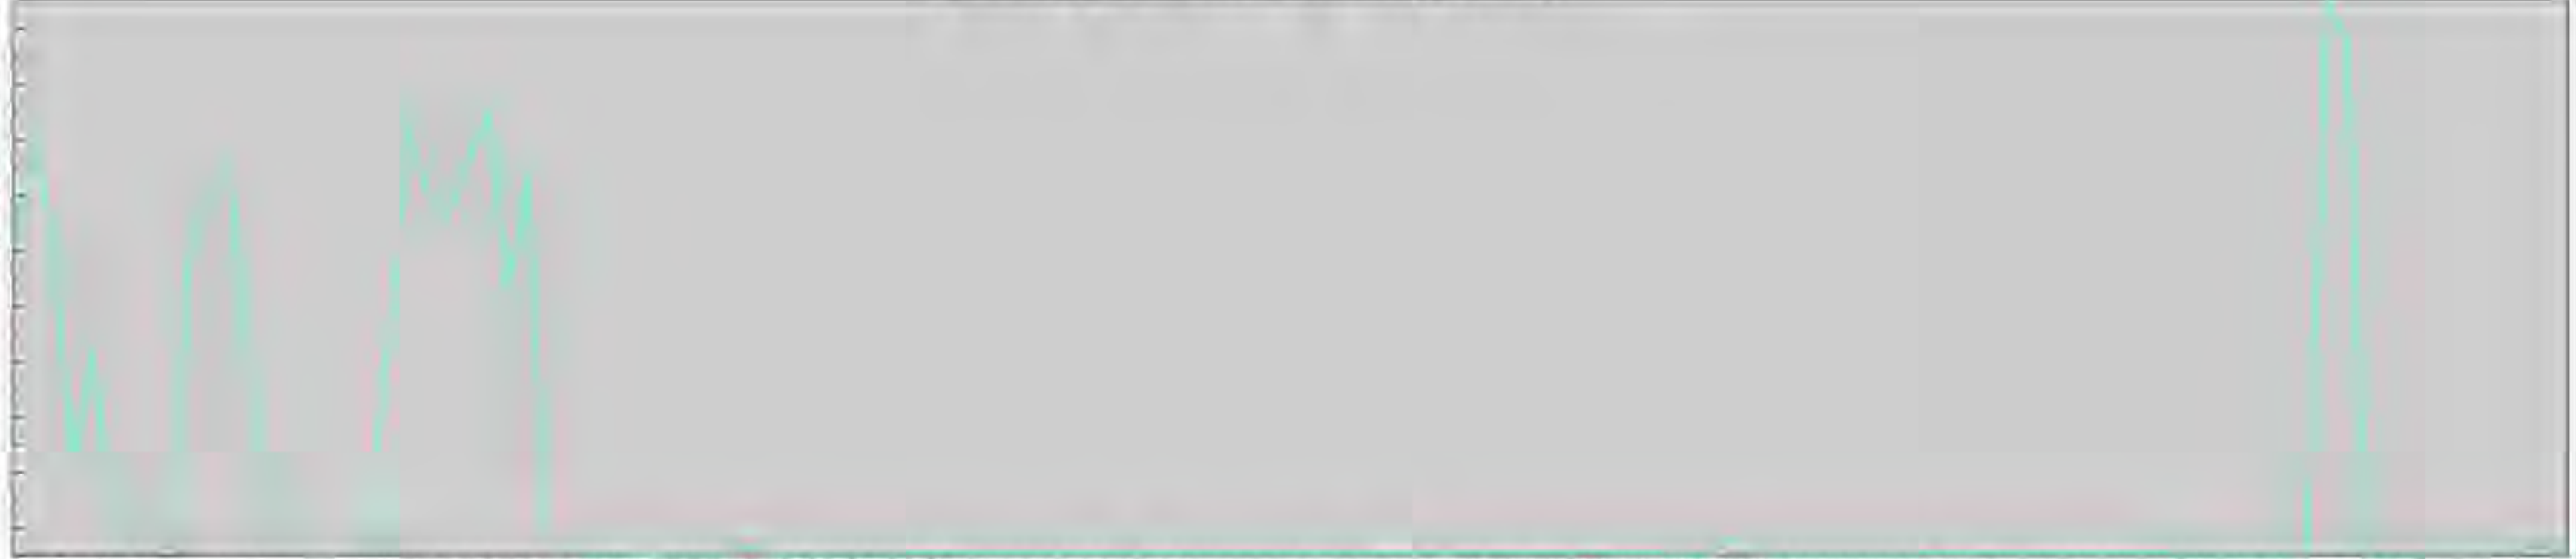

30-NALT GSM289411 CELL  
 29-NALT GSM289410 CELL  
 28-NALT GSM289409 CELL  
 27-NALT GSM289408 CELL  
 26-Color-d9 GSM1988105 CELL  
 25-Color-d9 GSM1988104 CELL  
 24-Color-d9 GSM1988103 CELL  
 23-Color-d4 GSM1988102 CELL  
 22-Color-d4 GSM1988101 CELL  
 21-Intestine-large GSM258676 CELL  
 20-Intestine-large GSM258675 CELL  
 19-Intestine-small GSM258674 CELL  
 18-Intestine-small GSM258673 CELL  
 17-Lymph-nodes GSM258672 CELL  
 16-Lymph-nodes GSM258671 CELL  
 15-Spleen GSM258767 CELL  
 14-Spleen GSM258766 CELL  
 13-Neuro2a GSM258728 CELL  
 12-Neuro2a GSM258727 CELL  
 11-Astrocytes GSM241898 CELL  
 10-mimb GSM258726 CELL  
 9-mimb GSM258725 CELL  
 8-MIMCD3 GSM258724 CELL  
 7-MIMCD3 GSM258723 CELL  
 6-Bruce4 GSM258665 CELL  
 5-Bruce4 GSM258664 CELL  
 4-C2C12 GSM258690 CELL  
 3-C2C12 GSM258689 CELL  
 2-NH3T3 GSM258730 CELL  
 1-NH3T3 GSM258729 CELL  
 99-3T3-L1 GSM258610 CELL  
 98-10T12 GSM258609 CELL  
 97-10T12 GSM258632 CELL  
 96-Osteoblast-d21 GSM258740 CELL  
 95-Osteoblast-d21 GSM258739 CELL  
 94-Osteoblast-d14 GSM258738 CELL  
 93-Osteoblast-d14 GSM258737 CELL  
 92-Osteoblast-d5 GSM258742 CELL  
 91-Osteoblast-d5 GSM258741 CELL  
 90-Chondrocytes GSM266741 CELL  
 89-Chondrocytes GSM266740 CELL  
 88-Nat Helper cell GSM465594 CELL  
 87-Nat Helper cell GSM465593 CELL  
 86-TT cell GSM465596 CELL  
 85-MS-1 GSM234692 CELL  
 84-Lymph-endo-cells GSM143704 CELL  
 83-P-FDC GSM481977 CELL  
 82-P-FDC GSM481978 CELL  
 81-P-FDC GSM481976 CELL  
 80-L-Y RMLNDCC003001 CELL  
 79-L-Y RMLNDCC003001 CELL  
 78-Follicular-Bcells GSM258664 CELL  
 77-Follicular-Bcells GSM258663 CELL  
 76-MZ-Bcell GSM258627 CELL  
 75-MZ-Bcell GSM258627 CELL  
 74-BAF3 GSM258620 CELL  
 73-BAF3 GSM258619 CELL  
 72-Tregs GSM258778 CELL  
 71-Tregs GSM258777 CELL  
 70-T-cells-CD8+ GSM258776 CELL  
 69-T-cells-CD8+ GSM258774 CELL  
 68-T-cells-CD4+ GSM258773 CELL  
 67-T-cells-CD4+ GSM258744 CELL  
 66-Thymocyte-DN GSM465595 CELL  
 65-Osteoclasts GSM258743 CELL  
 64-Microglia GSM258721 CELL  
 63-Microglia GSM258721 CELL  
 62-MM-LPS-7h GSM268706 CELL  
 61-MM-LPS-7h GSM268706 CELL  
 60-MM-LPS-6h GSM258702 CELL  
 59-MM-LPS-6h GSM258702 CELL  
 58-MM-LPS-6h GSM258699 CELL  
 57-MM-LPS-6h GSM258699 CELL  
 56-MM-LPS-6h GSM258694 CELL  
 55-MM-LPS-6h GSM258694 CELL  
 54-Plasmacytoid-DC GSM258650 CELL  
 53-Plasmacytoid-DC GSM258649 CELL  
 52-CD8a-DC GSM258647 CELL  
 51-CD8a-DC GSM258647 CELL  
 50-CD8a+DC GSM258646 CELL  
 49-CD8a+DC GSM258646 CELL  
 48-NK-cells GSM258732 CELL  
 47-NK-cells GSM258731 CELL  
 46-Mast-cells-IgE+Ad GSM258719 CELL  
 45-Mast-cells-IgE+Ad GSM258717 CELL  
 44-Mast-cells-IgE GSM258714 CELL  
 43-Mast-cells-IgE GSM258713 CELL  
 42-Mast-cells-IgE GSM258712 CELL  
 41-Mast-cells-IgE GSM258712 CELL  
 40-Granulocytes GSM258667 CELL  
 39-Granulocytes GSM258667 CELL  
 38-GMP GSM258666 CELL  
 37-GMP GSM258666 CELL  
 36-GMP GSM258665 CELL  
 35-GMP GSM258665 CELL  
 34-MEP GSM258872 CELL  
 33-MEP GSM258871 CELL  
 32-MEP GSM258871 CELL  
 31-HSC GSM258870 CELL  
 30-HSC GSM258870 CELL  
 29-Bone marrow GSM258867 CELL  
 28-Bone marrow GSM258867 CELL  
 27-paneth-cells-GF-1 GSM116357 CELL  
 26-paneth-cells-GF-1 GSM116357 CELL  
 25-paneth-cells-GF-1 GSM116350 CELL  
 24-paneth-cells-GF-1 GSM116350 CELL  
 23-paneth-cells-GF-1 GSM116350 CELL  
 22-paneth-cells-GF-1 GSM116350 CELL  
 21-paneth-cells-GF-1 GSM116350 CELL  
 20-Colon-Crypt GSM480374 cel  
 19-Colon-Vill GSM480363 cel  
 18-Colon-Vill GSM480362 cel  
 17-Colon-IEC-GF GSM349880 CELL  
 16-Colon-IEC-GF GSM350375 CELL  
 15-Ileum-IEC-GF GSM350376 CELL  
 14-Ileum-IEC GSM350371 CELL  
 13-Small-intestine-epithelium RMINEP002001 CELL  
 12-Small-intestine-epithelium RMINEP001001 CELL  
 11-FAE RMPYEP002001 CELL  
 10-FAE RMPYEP001001 CELL  
 9-Ileum-IEC GSM190797 CELL  
 8-Ileum-IEC GSM190796 CELL  
 7-Ileum-IEC GSM190795 CELL  
 6-CT-v-M-cells GSM190794 CELL  
 5-CT-v-M-cells GSM190793 CELL  
 4-CT-v-M-cells GSM190792 CELL  
 3-PP-M-cells GSM190791 CELL  
 2-PP-M-cells GSM190790 CELL  
 1-PP-M-cells GSM190789 CELL



Cluster0311\_House keeping-cell cycle (7 nodes)

1,411.1  
1,336.9  
1,262.6  
1,188.3  
1,114  
1,039.8  
965.5  
891.2  
817  
742.7  
668.4  
594.2  
519.9  
445.6  
371.3  
297.1  
222.8  
148.5  
74.3  
0

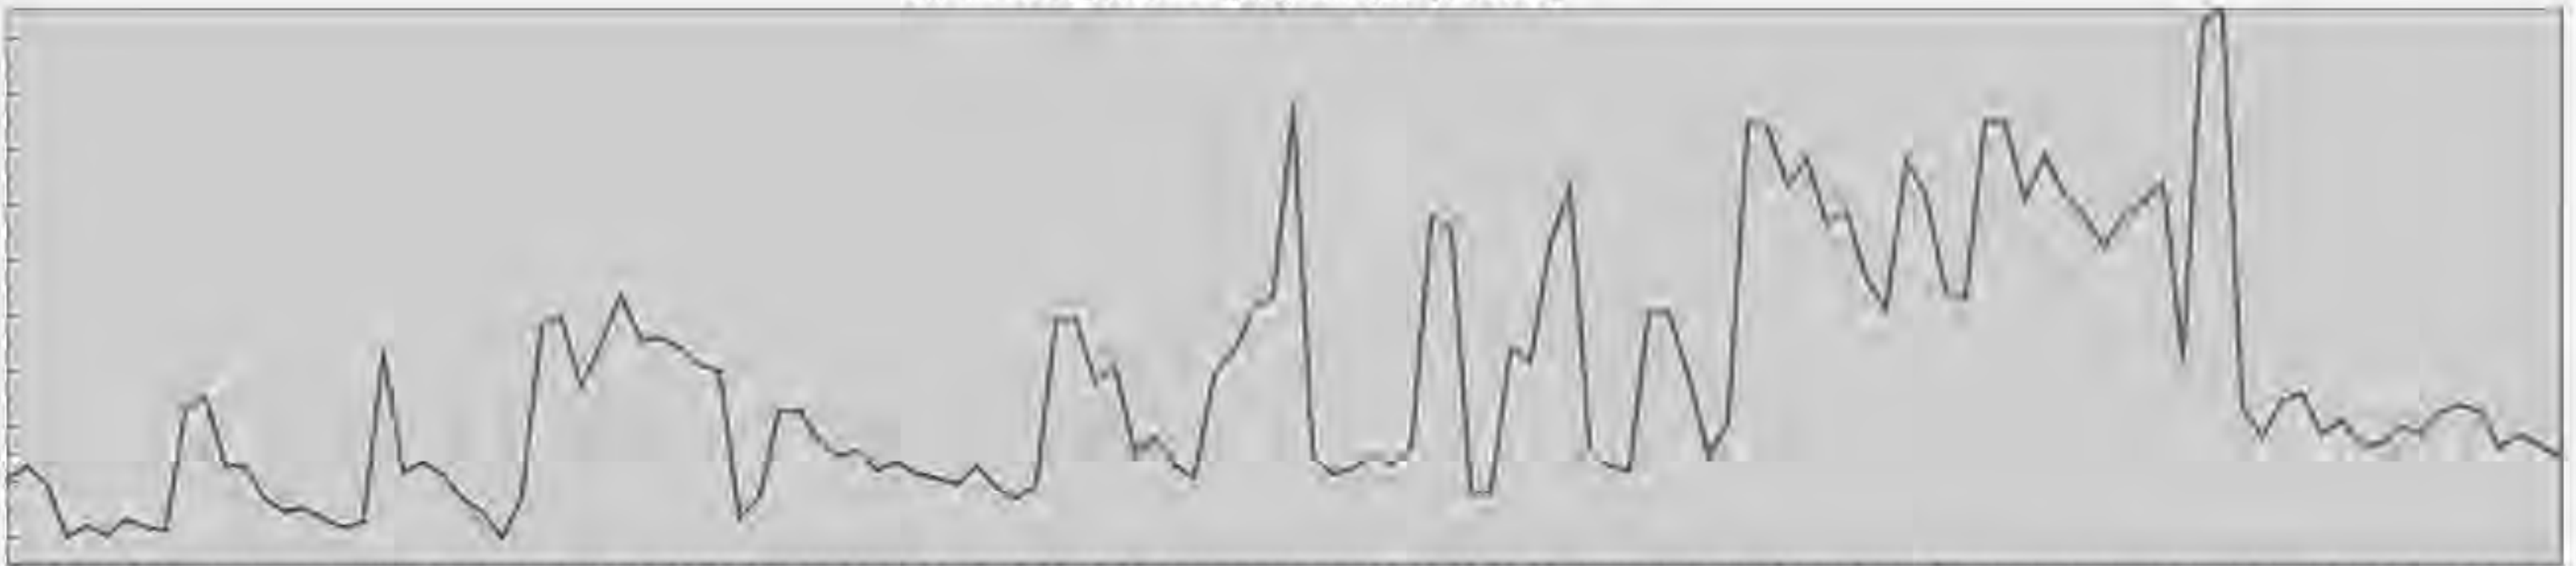

01-PP-M-cells\_GSM190789.CEL  
02-PP-M-cells\_GSM190790.CEL  
03-PP-M-cells\_GSM190791.CEL  
04-CT-v-M-cells\_GSM190792.CEL  
05-CT-v-M-cells\_GSM190793.CEL  
06-CT-v-M-cells\_GSM190794.CEL  
07-Ileum-IEC\_GSM190795.CEL  
08-Ileum-IEC\_GSM190796.CEL  
09-Ileum-IEC\_GSM190797.CEL  
10-FAE-RMPYE\_P001001.CEL  
11-FAE-RMPYE\_P002001.CEL  
12-Small-intestine-epithelium\_RMINEP001001.CEL  
13-Small-intestine-epithelium\_RMINEP002001.CEL  
14-Ileum-IEC\_GSM350371.CEL  
15-Colon-IEC-Gf\_GSM350375.CEL  
16-Colon-Vill-GSM480362.CEL  
17-Colon-Vill-GSM480363.CEL  
18-Colon-Vill-GSM480364.CEL  
19-Colon-Crypt-GSM480374.CEL  
20-Colon-Crypt-GSM480375.CEL  
21-Paneth-cells-GSM480375.CEL  
22-Paneth-cells-GSM116350.CEL  
23-Paneth-cells-GSM116359.CEL  
24-Paneth-cells-GSM116359.CEL  
25-Paneth-cells-GSM318589.CEL  
26-Paneth-cells-GSM318590.CEL  
27-Bone marrow\_GSM258628.CEL  
28-Paneth-cells-Gf-GSM116357.CEL  
29-Paneth-cells-Gf-GSM116358.CEL  
30-HSC-GSM258770.CEL  
31-MEP-GSM258771.CEL  
32-MEP-GSM258772.CEL  
33-MEP-GSM258773.CEL  
34-MEP-GSM258774.CEL  
35-MEP-GSM258775.CEL  
36-MEP-GSM258776.CEL  
37-MEP-GSM258777.CEL  
38-Granulocytes\_GSM258667.CEL  
39-Granulocytes\_GSM258668.CEL  
40-Mast-cells\_GSM258712.CEL  
41-Mast-cells\_GSM258713.CEL  
42-Mast-cells-IgE-GSM258714.CEL  
43-Mast-cells-IgE+Ad-GSM258718.CEL  
44-Mast-cells-IgE+Ad-GSM258717.CEL  
45-Mast-cells-IgE+Ad-GSM258714.CEL  
46-NK-cells\_GSM258731.CEL  
47-NK-cells\_GSM258732.CEL  
48-CD8a+DC\_GSM258646.CEL  
49-CD8a+DC\_GSM258646.CEL  
50-CD8a-DC\_GSM258647.CEL  
51-CD8a-DC\_GSM258647.CEL  
52-Plasmacytoid-DC\_GSM258650.CEL  
53-Plasmacytoid-DC\_GSM258649.CEL  
54-BMM-GSM258694.CEL  
55-BMM-GSM258694.CEL  
56-BMM-LPS-6h-GSM258700.CEL  
57-BMM-LPS-6h-GSM258700.CEL  
58-BMM-LPS-7h-GSM258702.CEL  
59-BMM-LPS-7h-GSM258702.CEL  
60-BMM-LPS-7h-GSM258706.CEL  
61-BMM-LPS-7h-GSM258706.CEL  
62-Microglia\_GSM258721.CEL  
63-Microglia\_GSM258721.CEL  
64-Osteoclasts\_GSM258743.CEL  
65-Osteoclasts\_GSM258744.CEL  
66-Thymocyte-DN\_GSM465595.CEL  
67-T-cells-CD4+GSM258773.CEL  
68-T-cells-CD4+GSM258773.CEL  
69-T-cells-CD8+GSM258776.CEL  
70-T-cells-CD8+GSM258776.CEL  
71-Tregs\_GSM258778.CEL  
72-Tregs\_GSM258778.CEL  
73-BAF3\_GSM258620.CEL  
74-BAF3\_GSM258620.CEL  
75-MZ-Bcell\_GSM258621.CEL  
76-MZ-Bcell\_GSM258621.CEL  
77-Follicular-Bcells\_GSM258653.CEL  
78-Follicular-Bcells\_GSM258653.CEL  
79-E-L-Y-RMLNDC002001.CEL  
80-E-L-Y-RMLNDC003001.CEL  
81-PP-FDC\_GSM481976.CEL  
82-PP-FDC\_GSM481978.CEL  
83-PP-FDC\_GSM481977.CEL  
84-Lymph-endc-cells\_GSM143704.CEL  
85-MS-1\_GSM234692.CEL  
86-LTcell\_GSM465596.CEL  
87-NatHelper cell\_GSM465593.CEL  
88-NatHelper cell\_GSM465594.CEL  
89-Chondrocytes\_GSM258741.CEL  
90-Chondrocytes\_GSM258741.CEL  
91-Osteoblast-d5\_GSM258742.CEL  
92-Osteoblast-d5\_GSM258742.CEL  
93-Osteoblast-d14\_GSM258737.CEL  
94-Osteoblast-d14\_GSM258738.CEL  
95-Osteoblast-d21\_GSM258740.CEL  
96-Osteoblast-d21\_GSM258739.CEL  
97-10T12\_GSM258631.CEL  
98-10T12\_GSM258631.CEL  
99-3T3-L1\_GSM258610.CEL  
100-3T3-L1\_GSM258610.CEL  
101-NH3T3\_GSM258739.CEL  
102-NH3T3\_GSM258739.CEL  
103-C2C12\_GSM258629.CEL  
104-C2C12\_GSM258630.CEL  
105-Bruce4\_GSM258656.CEL  
106-Bruce4\_GSM258656.CEL  
107-MIMCD3\_GSM258723.CEL  
108-MIMCD3\_GSM258723.CEL  
109-mim6\_GSM258725.CEL  
110-mim6\_GSM258725.CEL  
111-Astrocytes\_GSM241898.CEL  
112-Astrocytes\_GSM241898.CEL  
113-Spleen\_GSM258767.CEL  
114-Spleen\_GSM258767.CEL  
115-Lymph-nodes\_GSM258691.CEL  
116-Lymph-nodes\_GSM258691.CEL  
117-Lymph-nodes\_GSM258691.CEL  
118-Intestine-small\_GSM258692.CEL  
119-Intestine-small\_GSM258692.CEL  
120-Intestine-large\_GSM258678.CEL  
121-Intestine-large\_GSM258676.CEL  
122-Colon-d4\_GSM198101.CEL  
123-Colon-d4\_GSM198101.CEL  
124-Colon-d9\_GSM198103.CEL  
125-Colon-d9\_GSM198103.CEL  
126-NALT\_GSM289408.CEL  
127-NALT\_GSM289408.CEL  
128-NALT\_GSM289409.CEL  
129-NALT\_GSM289410.CEL  
130-NALT\_GSM289411.CEL



Cluster0312\_High in IEC (7 nodes)

6,568.7  
6,223  
5,877.3  
5,531.6  
5,185.8  
4,840.1  
4,494.4  
4,148.7  
3,803  
3,457.2  
3,111.5  
2,765.8  
2,420.1  
2,074.3  
1,728.6  
1,382.9  
1,037.2  
691.4  
345.7  
0

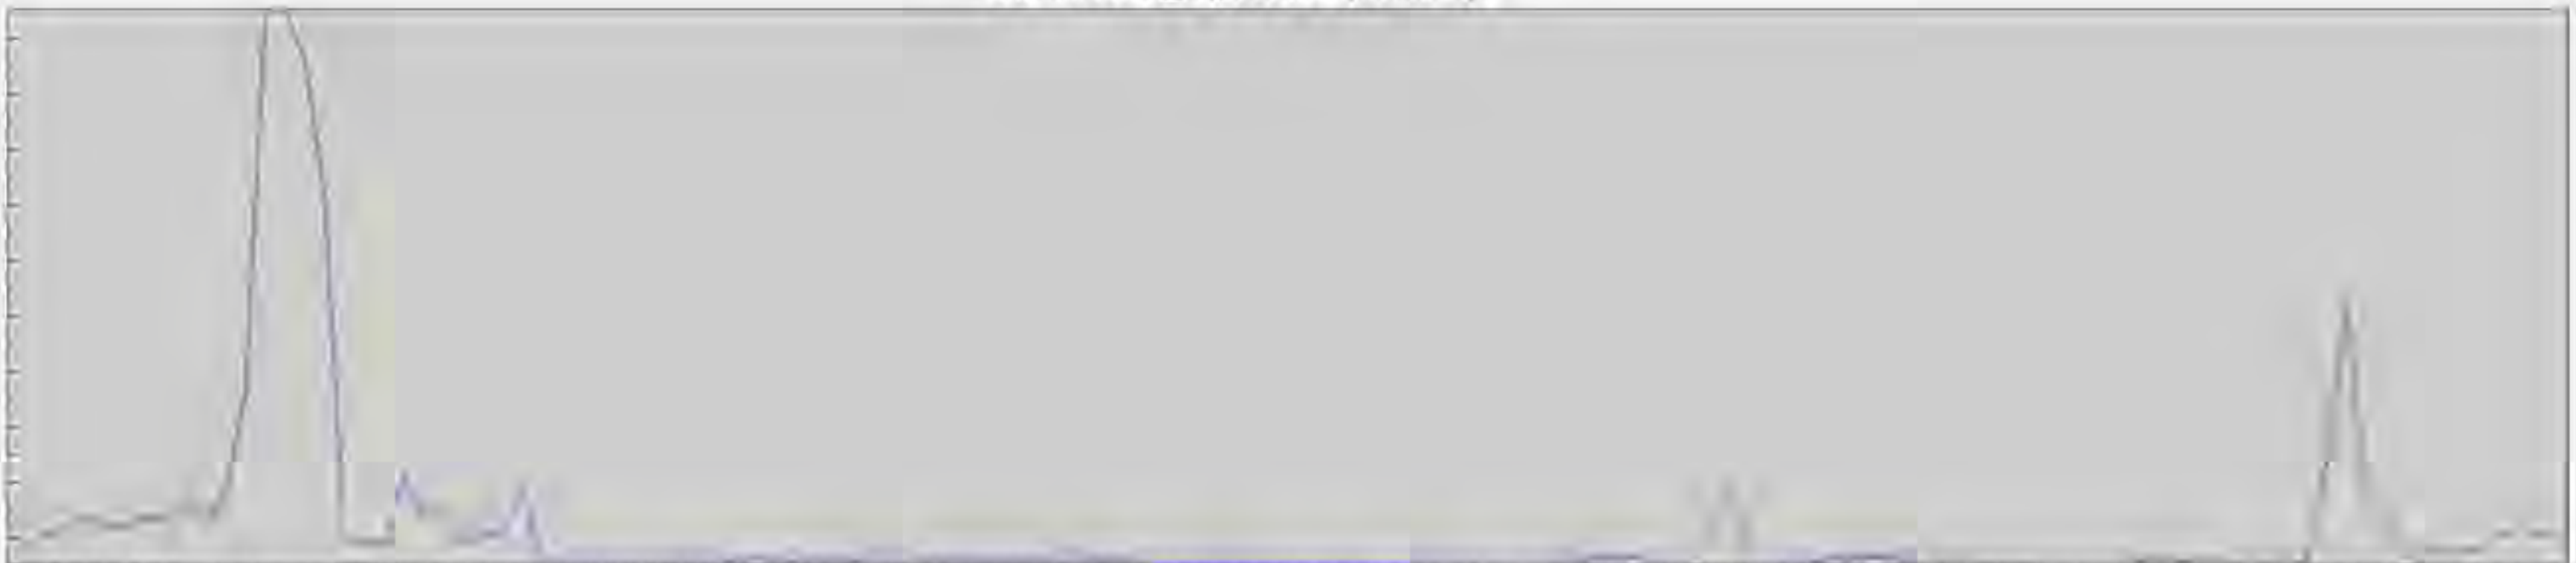

|     |                            |              |     |
|-----|----------------------------|--------------|-----|
| 130 | NALT                       | GSM289411    | CEL |
| 129 | NALT                       | GSM289410    | CEL |
| 128 | NALT                       | GSM289409    | CEL |
| 127 | NALT                       | GSM289408    | CEL |
| 126 | Colon-d9                   | GSM1988104   | CEL |
| 125 | Colon-d9                   | GSM1988103   | CEL |
| 124 | Colon-d9                   | GSM1988102   | CEL |
| 123 | Colon-d4                   | GSM1988101   | CEL |
| 122 | Colon-d4                   | GSM1988100   | CEL |
| 121 | Intestine-large            | GSM258676    | CEL |
| 120 | Intestine-large            | GSM258675    | CEL |
| 119 | Intestine-small            | GSM258674    | CEL |
| 118 | Intestine-small            | GSM258673    | CEL |
| 117 | Lymph-nodes                | GSM258672    | CEL |
| 116 | Spleen                     | GSM258671    | CEL |
| 115 | Spleen                     | GSM258670    | CEL |
| 114 | Neuro2a                    | GSM258669    | CEL |
| 113 | Neuro2a                    | GSM258668    | CEL |
| 112 | Astrocytes                 | GSM241898    | CEL |
| 111 | ming6                      | GSM258667    | CEL |
| 110 | ming6                      | GSM258666    | CEL |
| 109 | ming6                      | GSM258665    | CEL |
| 108 | MIMCD3                     | GSM258664    | CEL |
| 107 | MIMCD3                     | GSM258663    | CEL |
| 106 | Bruce4                     | GSM258662    | CEL |
| 105 | Bruce4                     | GSM258661    | CEL |
| 104 | C2C12                      | GSM258660    | CEL |
| 103 | C2C12                      | GSM258659    | CEL |
| 102 | NH3T3                      | GSM258658    | CEL |
| 101 | NH3T3                      | GSM258657    | CEL |
| 100 | 3T3-L1                     | GSM258656    | CEL |
| 99  | 3T3-L1                     | GSM258655    | CEL |
| 98  | 10T1/2                     | GSM258654    | CEL |
| 97  | 10T1/2                     | GSM258653    | CEL |
| 96  | Osteoblast-d21             | GSM258652    | CEL |
| 95  | Osteoblast-d21             | GSM258651    | CEL |
| 94  | Osteoblast-d14             | GSM258650    | CEL |
| 93  | Osteoblast-d14             | GSM258649    | CEL |
| 92  | Osteoblast-d5              | GSM258648    | CEL |
| 91  | Osteoblast-d5              | GSM258647    | CEL |
| 90  | Chondrocytes               | GSM258646    | CEL |
| 89  | Chondrocytes               | GSM258645    | CEL |
| 88  | Nat Helper cell            | GSM465594    | CEL |
| 87  | Nat Helper cell            | GSM465593    | CEL |
| 86  | Tt cell                    | GSM465592    | CEL |
| 85  | MS-1                       | GSM234692    | CEL |
| 84  | Lymph-endo-cells           | GSM143704    | CEL |
| 83  | PP-FDC                     | GSM481977    | CEL |
| 82  | PP-FDC                     | GSM481978    | CEL |
| 81  | PP-FDC                     | GSM481979    | CEL |
| 80  | E-LY                       | RMLNDC003001 | CEL |
| 79  | E-LY                       | RMLNDC003001 | CEL |
| 78  | Follicular-Bcells          | GSM258664    | CEL |
| 77  | Follicular-Bcells          | GSM258663    | CEL |
| 76  | MZ-Bcell                   | GSM258662    | CEL |
| 75  | MZ-Bcell                   | GSM258661    | CEL |
| 74  | BAF3                       | GSM258660    | CEL |
| 73  | BAF3                       | GSM258659    | CEL |
| 72  | Tregs                      | GSM258658    | CEL |
| 71  | T-cells-CD8+               | GSM258657    | CEL |
| 70  | T-cells-CD8+               | GSM258656    | CEL |
| 69  | T-cells-CD4+               | GSM258655    | CEL |
| 68  | T-cells-CD4+               | GSM258654    | CEL |
| 67  | T-cells-CD4+               | GSM258653    | CEL |
| 66  | Thymocyte-DN               | GSM465595    | CEL |
| 65  | Osteoclasts                | GSM258674    | CEL |
| 64  | Microglia                  | GSM258673    | CEL |
| 63  | Microglia                  | GSM258672    | CEL |
| 62  | MM-LPS-7h                  | GSM258671    | CEL |
| 61  | MM-LPS-7h                  | GSM258670    | CEL |
| 60  | MM-LPS-6h                  | GSM258669    | CEL |
| 59  | MM-LPS-6h                  | GSM258668    | CEL |
| 58  | MM-LPS-6h                  | GSM258667    | CEL |
| 57  | MM-LPS-6h                  | GSM258666    | CEL |
| 56  | MM-LPS-6h                  | GSM258665    | CEL |
| 55  | MM-LPS-6h                  | GSM258664    | CEL |
| 54  | MM-LPS-6h                  | GSM258663    | CEL |
| 53  | MM-LPS-6h                  | GSM258662    | CEL |
| 52  | MM-LPS-6h                  | GSM258661    | CEL |
| 51  | MM-LPS-6h                  | GSM258660    | CEL |
| 50  | CD8a-DC                    | GSM258647    | CEL |
| 49  | CD8a-DC                    | GSM258646    | CEL |
| 48  | CD8a+DC                    | GSM258645    | CEL |
| 47  | NK-cells                   | GSM258673    | CEL |
| 46  | NK-cells                   | GSM258672    | CEL |
| 45  | Mast-cells-IgE+Ad          | GSM258671    | CEL |
| 44  | Mast-cells-IgE+Ad          | GSM258670    | CEL |
| 43  | Mast-cells-IgE             | GSM258669    | CEL |
| 42  | Mast-cells-IgE             | GSM258668    | CEL |
| 41  | Mast-cells-IgE             | GSM258667    | CEL |
| 40  | Granulocytes               | GSM258666    | CEL |
| 39  | Granulocytes               | GSM258665    | CEL |
| 38  | GMP                        | GSM258664    | CEL |
| 37  | GMP                        | GSM258663    | CEL |
| 36  | GMP                        | GSM258662    | CEL |
| 35  | GMP                        | GSM258661    | CEL |
| 34  | GMP                        | GSM258660    | CEL |
| 33  | MIEP                       | GSM258659    | CEL |
| 32  | MIEP                       | GSM258658    | CEL |
| 31  | HS-C                       | GSM258657    | CEL |
| 30  | HS-C                       | GSM258656    | CEL |
| 29  | Bone marrow                | GSM258655    | CEL |
| 28  | paneth-cells-GF            | GSM116357    | CEL |
| 27  | paneth-cells-GF            | GSM116356    | CEL |
| 26  | paneth-cells-GF            | GSM116355    | CEL |
| 25  | paneth-cells-GF            | GSM116354    | CEL |
| 24  | paneth-cells-GF            | GSM116353    | CEL |
| 23  | paneth-cells-GF            | GSM116352    | CEL |
| 22  | paneth-cells-GF            | GSM116351    | CEL |
| 21  | Colon-Crypt                | GSM480375    | CEL |
| 20  | Colon-Crypt                | GSM480374    | CEL |
| 19  | Colon-Vill                 | GSM480363    | CEL |
| 18  | Colon-Vill                 | GSM480362    | CEL |
| 17  | Colon-IEC-Gf               | GSM349880    | CEL |
| 16  | Colon-IEC-Gf               | GSM350375    | CEL |
| 15  | ileum-IEC-TGF              | GSM350376    | CEL |
| 14  | ileum-IEC-TGF              | GSM350371    | CEL |
| 13  | Small-intestine-epithelium | RMINEP002901 | CEL |
| 12  | Small-intestine-epithelium | RMINEP001001 | CEL |
| 11  | FAE-RMPYE002001            | CEL          |     |
| 10  | FAE-RMPYE001001            | CEL          |     |
| 09  | ileum-IEC                  | GSM190797    | CEL |
| 08  | ileum-IEC                  | GSM190796    | CEL |
| 07  | ileum-IEC                  | GSM190795    | CEL |
| 06  | CT-w-M-cells               | GSM190794    | CEL |
| 05  | CT-w-M-cells               | GSM190793    | CEL |
| 04  | CT-y-M-cells               | GSM190792    | CEL |
| 03  | PP-M-cells                 | GSM190791    | CEL |
| 02  | PP-M-cells                 | GSM190790    | CEL |
| 01  | PP-M-cells                 | GSM190789    | CEL |



Cluster0313\_Large intestine-related (7 nodes)

3,249.6  
3,078.5  
2,907.5  
2,736.5  
2,565.4  
2,394.4  
2,223.4  
2,052.4  
1,881.3  
1,710.3  
1,539.3  
1,368.2  
1,197.2  
1,026.2  
855.1  
684.1  
513.1  
342.1  
171  
0

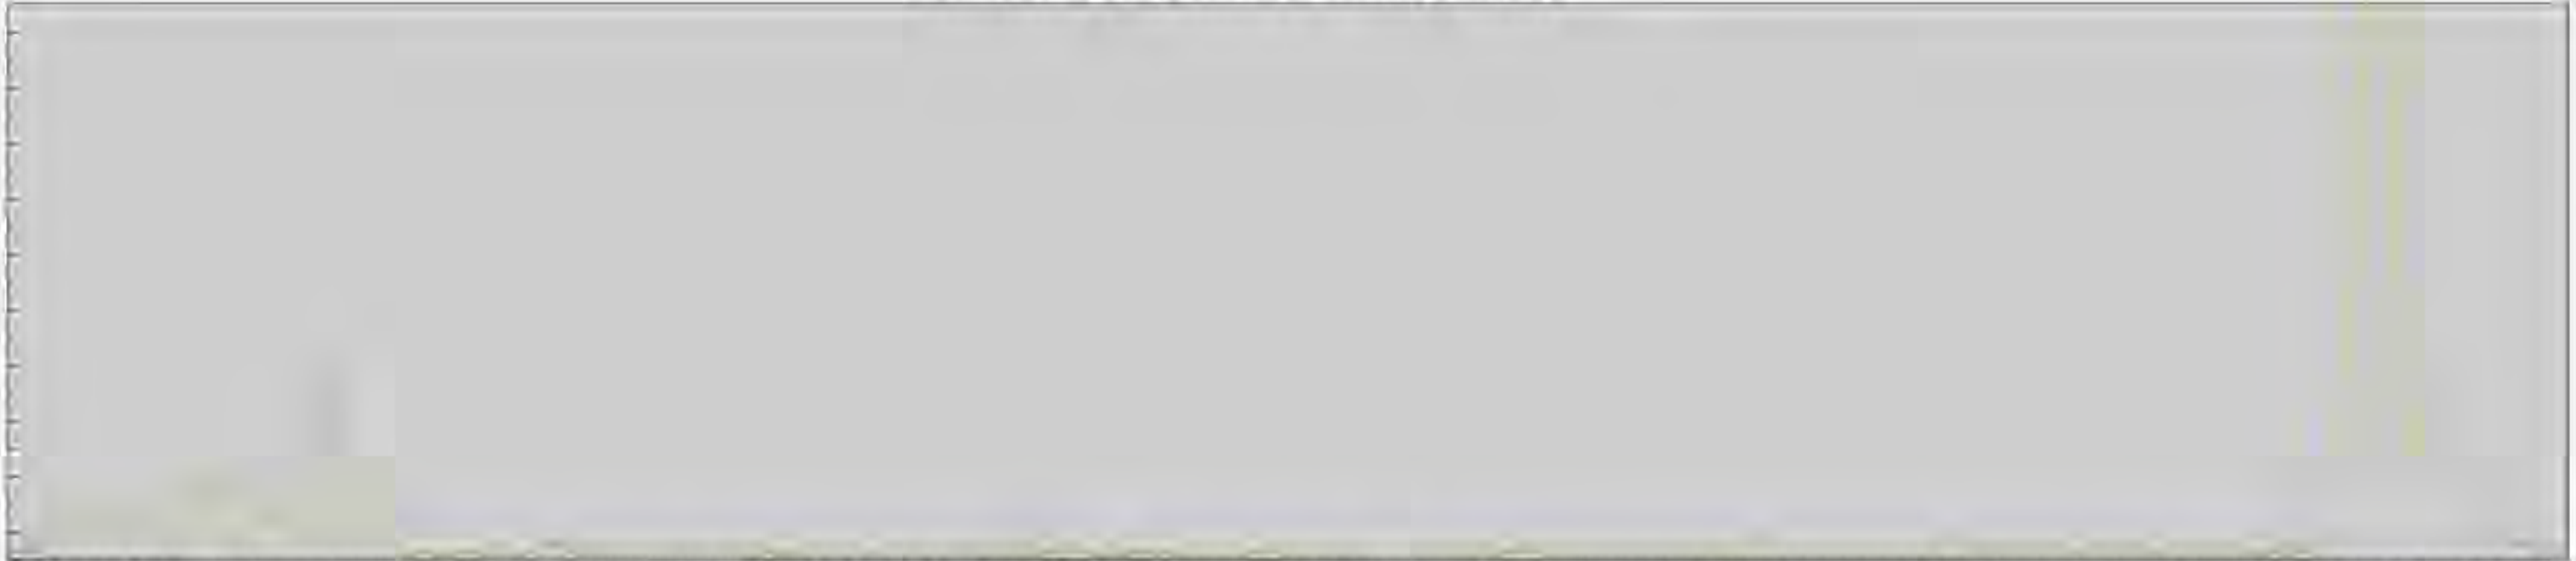

|     |                            |              |     |
|-----|----------------------------|--------------|-----|
| 01  | PP-M-cells                 | GSM190789    | CEL |
| 02  | PP-M-cells                 | GSM190790    | CEL |
| 03  | PP-M-cells                 | GSM190791    | CEL |
| 04  | CT-Y-M-cells               | GSM190792    | CEL |
| 05  | CT-Y-M-cells               | GSM190793    | CEL |
| 06  | CT-W-M-cells               | GSM190794    | CEL |
| 07  | Ileum-IEC                  | GSM190795    | CEL |
| 08  | Ileum-IEC                  | GSM190796    | CEL |
| 09  | Ileum-IEC                  | GSM190797    | CEL |
| 10  | FAE-RMP                    | GSM190798    | CEL |
| 11  | FAE-RMP                    | GSM190799    | CEL |
| 12  | Small-intestine-epithelium | RMINEP001001 | CEL |
| 13  | Small-intestine-epithelium | RMINEP002001 | CEL |
| 14  | Ileum-IEC                  | GSM350371    | CEL |
| 15  | Ileum-IEC                  | GSM350375    | CEL |
| 16  | Colon-VIII                 | GSM480362    | cel |
| 17  | Colon-VIII                 | GSM480363    | cel |
| 18  | Colon-VIII                 | GSM480364    | cel |
| 19  | Colon-VIII                 | GSM480365    | cel |
| 20  | Colon-Crypt                | GSM480374    | cel |
| 21  | Colon-Crypt                | GSM480375    | cel |
| 22  | Paneth-cells               | GSM318589    | CEL |
| 23  | Paneth-cells               | GSM318590    | CEL |
| 24  | Paneth-cells               | GSM116359    | CEL |
| 25  | Paneth-cells               | GSM116360    | CEL |
| 26  | Paneth-cells               | GSM116357    | CEL |
| 27  | Paneth-cells               | GSM116358    | CEL |
| 28  | Bone marrow                | GSM258627    | CEL |
| 29  | Bone marrow                | GSM258628    | CEL |
| 30  | NALT                       | GSM289410    | CEL |
| 31  | NALT                       | GSM289411    | CEL |
| 32  | NALT                       | GSM289412    | CEL |
| 33  | NALT                       | GSM289413    | CEL |
| 34  | Colon-d9                   | GSM198810    | CEL |
| 35  | Colon-d9                   | GSM198811    | CEL |
| 36  | Colon-d9                   | GSM198812    | CEL |
| 37  | Colon-d4                   | GSM198813    | CEL |
| 38  | Colon-d4                   | GSM198814    | CEL |
| 39  | Colon-d4                   | GSM198815    | CEL |
| 40  | Intestine-large            | GSM258675    | CEL |
| 41  | Intestine-large            | GSM258676    | CEL |
| 42  | Intestine-small            | GSM258677    | CEL |
| 43  | Intestine-small            | GSM258678    | CEL |
| 44  | Spleen                     | GSM258679    | CEL |
| 45  | Spleen                     | GSM258680    | CEL |
| 46  | Neuro2a                    | GSM241898    | CEL |
| 47  | Neuro2a                    | GSM241899    | CEL |
| 48  | Astrocytes                 | GSM241900    | CEL |
| 49  | ming                       | GSM258725    | CEL |
| 50  | ming                       | GSM258726    | CEL |
| 51  | ming                       | GSM258727    | CEL |
| 52  | MIMCD3                     | GSM258728    | CEL |
| 53  | MIMCD3                     | GSM258729    | CEL |
| 54  | MIMCD3                     | GSM258730    | CEL |
| 55  | Bruce4                     | GSM258731    | CEL |
| 56  | Bruce4                     | GSM258732    | CEL |
| 57  | Bruce4                     | GSM258733    | CEL |
| 58  | Bruce4                     | GSM258734    | CEL |
| 59  | C2C12                      | GSM258735    | CEL |
| 60  | C2C12                      | GSM258736    | CEL |
| 61  | NH3T3                      | GSM258737    | CEL |
| 62  | NH3T3                      | GSM258738    | CEL |
| 63  | NH3T3                      | GSM258739    | CEL |
| 64  | 3T3-L1                     | GSM258610    | CEL |
| 65  | 3T3-L1                     | GSM258611    | CEL |
| 66  | 3T3-L1                     | GSM258612    | CEL |
| 67  | 10T1/2                     | GSM258631    | CEL |
| 68  | 10T1/2                     | GSM258632    | CEL |
| 69  | Osteoblast-d21             | GSM258740    | CEL |
| 70  | Osteoblast-d21             | GSM258741    | CEL |
| 71  | Osteoblast-d14             | GSM258738    | CEL |
| 72  | Osteoblast-d14             | GSM258737    | CEL |
| 73  | Osteoblast-d5              | GSM258742    | CEL |
| 74  | Osteoblast-d5              | GSM258741    | CEL |
| 75  | Chondrocytes               | GSM266741    | CEL |
| 76  | Chondrocytes               | GSM266740    | CEL |
| 77  | Nat Helper cell            | GSM465594    | CEL |
| 78  | Nat Helper cell            | GSM465593    | CEL |
| 79  | MS-1                       | GSM234692    | CEL |
| 80  | Lymph-endo-cells           | GSM143704    | CEL |
| 81  | FDC                        | GSM481977    | CEL |
| 82  | FDC                        | GSM481978    | CEL |
| 83  | FDC                        | GSM481979    | CEL |
| 84  | FDC                        | GSM481976    | CEL |
| 85  | F-LY                       | RMLNDC002001 | CEL |
| 86  | F-LY                       | RMLNDC002001 | CEL |
| 87  | F-LY                       | RMLNDC002001 | CEL |
| 88  | Follicular-B-cells         | GSM258664    | CEL |
| 89  | Follicular-B-cells         | GSM258663    | CEL |
| 90  | MZ-Bcell                   | GSM258621    | CEL |
| 91  | MZ-Bcell                   | GSM258622    | CEL |
| 92  | BAF3                       | GSM258619    | CEL |
| 93  | BAF3                       | GSM258620    | CEL |
| 94  | Tregs                      | GSM258778    | CEL |
| 95  | Tregs                      | GSM258777    | CEL |
| 96  | T-cells-CD8+               | GSM258776    | CEL |
| 97  | T-cells-CD8+               | GSM258775    | CEL |
| 98  | T-cells-CD4+               | GSM258774    | CEL |
| 99  | T-cells-CD4+               | GSM258773    | CEL |
| 100 | T-cells-CD4+               | GSM258772    | CEL |
| 101 | Thymocyte-DN               | GSM465595    | CEL |
| 102 | Thymocyte-DN               | GSM465594    | CEL |
| 103 | Osteoclasts                | GSM258743    | CEL |
| 104 | Osteoclasts                | GSM258744    | CEL |
| 105 | Microglia                  | GSM258721    | CEL |
| 106 | Microglia                  | GSM258721    | CEL |
| 107 | PS-7h                      | GSM258706    | CEL |
| 108 | PS-7h                      | GSM258706    | CEL |
| 109 | PS-6h                      | GSM258702    | CEL |
| 110 | PS-6h                      | GSM258702    | CEL |
| 111 | PS-6h                      | GSM258699    | CEL |
| 112 | PS-6h                      | GSM258699    | CEL |
| 113 | PS-6h                      | GSM258694    | CEL |
| 114 | PS-6h                      | GSM258694    | CEL |
| 115 | PS-6h                      | GSM258694    | CEL |
| 116 | PS-6h                      | GSM258694    | CEL |
| 117 | PS-6h                      | GSM258694    | CEL |
| 118 | PS-6h                      | GSM258694    | CEL |
| 119 | PS-6h                      | GSM258694    | CEL |
| 120 | PS-6h                      | GSM258694    | CEL |
| 121 | PS-6h                      | GSM258694    | CEL |
| 122 | PS-6h                      | GSM258694    | CEL |
| 123 | PS-6h                      | GSM258694    | CEL |
| 124 | PS-6h                      | GSM258694    | CEL |
| 125 | PS-6h                      | GSM258694    | CEL |
| 126 | PS-6h                      | GSM258694    | CEL |
| 127 | PS-6h                      | GSM258694    | CEL |
| 128 | PS-6h                      | GSM258694    | CEL |
| 129 | PS-6h                      | GSM258694    | CEL |
| 130 | PS-6h                      | GSM258694    | CEL |
| 131 | PS-6h                      | GSM258694    | CEL |
| 132 | PS-6h                      | GSM258694    | CEL |
| 133 | PS-6h                      | GSM258694    | CEL |
| 134 | PS-6h                      | GSM258694    | CEL |
| 135 | PS-6h                      | GSM258694    | CEL |
| 136 | PS-6h                      | GSM258694    | CEL |
| 137 | PS-6h                      | GSM258694    | CEL |
| 138 | PS-6h                      | GSM258694    | CEL |
| 139 | PS-6h                      | GSM258694    | CEL |
| 140 | PS-6h                      | GSM258694    | CEL |
| 141 | PS-6h                      | GSM258694    | CEL |
| 142 | PS-6h                      | GSM258694    | CEL |
| 143 | PS-6h                      | GSM258694    | CEL |
| 144 | PS-6h                      | GSM258694    | CEL |
| 145 | PS-6h                      | GSM258694    | CEL |
| 146 | PS-6h                      | GSM258694    | CEL |
| 147 | PS-6h                      | GSM258694    | CEL |
| 148 | PS-6h                      | GSM258694    | CEL |
| 149 | PS-6h                      | GSM258694    | CEL |
| 150 | PS-6h                      | GSM258694    | CEL |
| 151 | PS-6h                      | GSM258694    | CEL |
| 152 | PS-6h                      | GSM258694    | CEL |
| 153 | PS-6h                      | GSM258694    | CEL |
| 154 | PS-6h                      | GSM258694    | CEL |
| 155 | PS-6h                      | GSM258694    | CEL |
| 156 | PS-6h                      | GSM258694    | CEL |
| 157 | PS-6h                      | GSM258694    | CEL |
| 158 | PS-6h                      | GSM258694    | CEL |
| 159 | PS-6h                      | GSM258694    | CEL |
| 160 | PS-6h                      | GSM258694    | CEL |
| 161 | PS-6h                      | GSM258694    | CEL |
| 162 | PS-6h                      | GSM258694    | CEL |
| 163 | PS-6h                      | GSM258694    | CEL |
| 164 | PS-6h                      | GSM258694    | CEL |
| 165 | PS-6h                      | GSM258694    | CEL |
| 166 | PS-6h                      | GSM258694    | CEL |
| 167 | PS-6h                      | GSM258694    | CEL |
| 168 | PS-6h                      | GSM258694    | CEL |
| 169 | PS-6h                      | GSM258694    | CEL |
| 170 | PS-6h                      | GSM258694    | CEL |
| 171 | PS-6h                      | GSM258694    | CEL |
| 172 | PS-6h                      | GSM258694    | CEL |
| 173 | PS-6h                      | GSM258694    | CEL |
| 174 | PS-6h                      | GSM258694    | CEL |
| 175 | PS-6h                      | GSM258694    | CEL |
| 176 | PS-6h                      | GSM258694    | CEL |
| 177 | PS-6h                      | GSM258694    | CEL |
| 178 | PS-6h                      | GSM258694    | CEL |
| 179 | PS-6h                      | GSM258694    | CEL |
| 180 | PS-6h                      | GSM258694    | CEL |
| 181 | PS-6h                      | GSM258694    | CEL |
| 182 | PS-6h                      | GSM258694    | CEL |
| 183 | PS-6h                      | GSM258694    | CEL |
| 184 | PS-6h                      | GSM258694    | CEL |
| 185 | PS-6h                      | GSM258694    | CEL |
| 186 | PS-6h                      | GSM258694    | CEL |
| 187 | PS-6h                      | GSM258694    | CEL |
| 188 | PS-6h                      | GSM258694    | CEL |
| 189 | PS-6h                      | GSM258694    | CEL |
| 190 | PS-6h                      | GSM258694    | CEL |
| 191 | PS-6h                      | GSM258694    | CEL |
| 192 | PS-6h                      | GSM258694    | CEL |
| 193 | PS-6h                      | GSM258694    | CEL |
| 194 | PS-6h                      | GSM258694    | CEL |
| 195 | PS-6h                      | GSM258694    | CEL |
| 196 | PS-6h                      | GSM258694    | CEL |
| 197 | PS-6h                      | GSM258694    | CEL |
| 198 | PS-6h                      | GSM258694    | CEL |
| 199 | PS-6h                      | GSM258694    | CEL |
| 200 | PS-6h                      | GSM258694    | CEL |



Cluster0314\_Uncertain (7 nodes)

4,641  
4,396.8  
4,152.5  
3,908.2  
3,664  
3,419.7  
3,175.4  
2,931.2  
2,686.9  
2,442.7  
2,198.4  
1,954.1  
1,709.9  
1,465.6  
1,221.3  
977.1  
732.8  
488.5  
244.3  
0

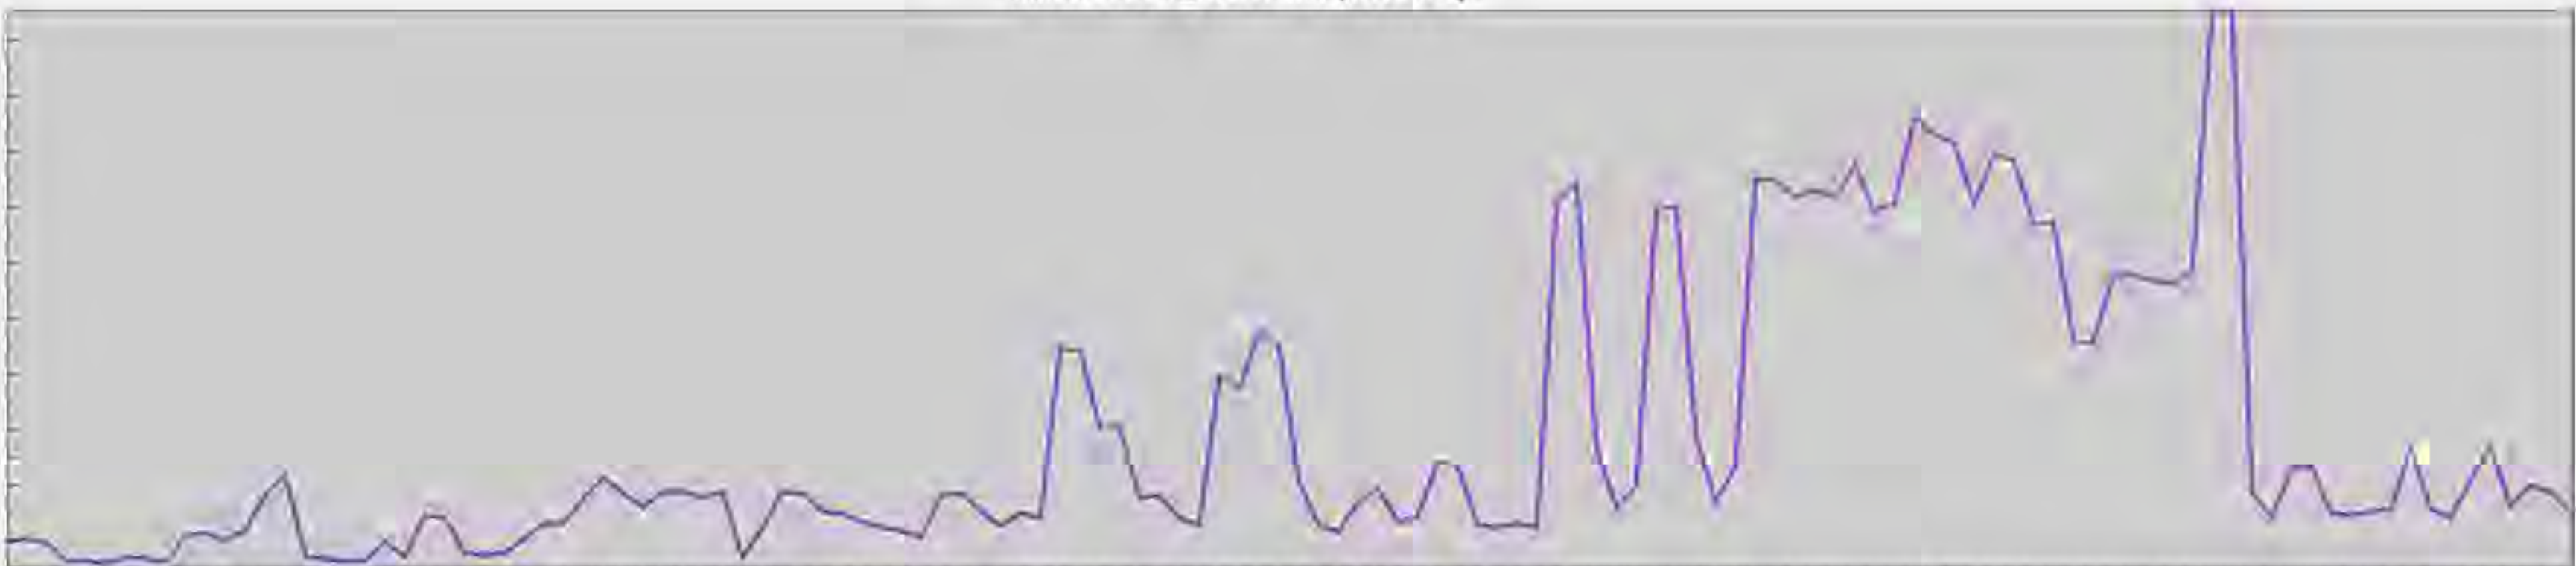

130-NALT GSM289411.CEL  
129-NALT GSM289410.CEL  
128-NALT GSM289409.CEL  
127-NALT GSM289408.CEL  
126-Colon-d9 GSM1988105.CEL  
125-Colon-d9 GSM1988104.CEL  
124-Colon-d9 GSM1988103.CEL  
123-Colon-d4 GSM1988102.CEL  
122-Colon-d4 GSM1988101.CEL  
121-Intestine-large GSM258676.CEL  
120-Intestine-large GSM258675.CEL  
119-Intestine-small GSM258678.CEL  
118-Intestine-small GSM258692.CEL  
117-Lymph-nodes GSM258691.CEL  
116-Spleen GSM258768.CEL  
115-Spleen GSM258767.CEL  
114-Neuro2a GSM258728.CEL  
113-Neuro2a GSM258727.CEL  
112-Astrocytes GSM241898.CEL  
111-mim6 GSM258726.CEL  
110-mim6 GSM258725.CEL  
109-mim6 GSM258724.CEL  
108-MIMCD3 GSM258723.CEL  
107-MIMCD3 GSM258722.CEL  
106-Bruce4 GSM258656.CEL  
105-Bruce4 GSM258655.CEL  
104-C2C12 GSM258690.CEL  
103-C2C12 GSM258629.CEL  
102-NH3T3 GSM258730.CEL  
101-NH3T3 GSM258729.CEL  
100-3T3-L1 GSM258610.CEL  
99-3T3-L1 GSM258609.CEL  
98-10T12 GSM258632.CEL  
97-10T12 GSM258631.CEL  
96-Osteoblast-d21 GSM258740.CEL  
95-Osteoblast-d21 GSM258739.CEL  
94-Osteoblast-d14 GSM258738.CEL  
93-Osteoblast-d14 GSM258737.CEL  
92-Osteoblast-d5 GSM258742.CEL  
91-Osteoblast-d5 GSM258741.CEL  
90-Chondrocytes GSM266741.CEL  
89-Chondrocytes GSM266740.CEL  
88-Nat Helper cell GSM465594.CEL  
87-Nat Helper cell GSM465593.CEL  
86-LT cell GSM465596.CEL  
85-MS-1 GSM234692.CEL  
84-Lymph-endo-cells GSM143704.CEL  
83-PP-FDC GSM481977.CEL  
82-PP-FDC GSM481978.CEL  
81-PP-FDC GSM481976.CEL  
80-F-LY RMLNDCC003001.CEL  
79-F-LY RMLNDCC003001.CEL  
78-Follicular-Bcells GSM258664.CEL  
77-Follicular-Bcells GSM258663.CEL  
76-MZ-Bcell GSM258622.CEL  
75-MZ-Bcell GSM258621.CEL  
74-BAF3 GSM258620.CEL  
73-BAF3 GSM258619.CEL  
72-Tregs GSM258778.CEL  
71-T-cells CD8+ GSM258777.CEL  
70-T-cells CD8+ GSM258776.CEL  
69-T-cells CD8+ GSM258775.CEL  
68-T-cells CD4+ GSM258774.CEL  
67-T-cells CD4+ GSM258773.CEL  
66-Thymocyte-DN GSM465595.CEL  
65-Osteoclasts GSM258744.CEL  
64-Microglia GSM258721.CEL  
63-Microglia GSM258721.CEL  
62-MM-LPS-7h GSM258706.CEL  
61-MM-LPS-7h GSM258706.CEL  
60-MM-LPS-7h GSM258705.CEL  
59-MM-LPS-6h GSM258702.CEL  
58-MM-LPS-6h GSM258701.CEL  
57-MM-LPS-6h GSM258699.CEL  
56-MM-LPS-6h GSM258699.CEL  
55-BMM GSM258694.CEL  
54-BMM GSM258694.CEL  
53-Plasmacytoid-DC GSM258650.CEL  
52-CD8a-DC GSM258648.CEL  
51-CD8a-DC GSM258647.CEL  
50-CD8a-DC GSM258647.CEL  
49-CD8a+DC GSM258646.CEL  
48-CD8a+DC GSM258645.CEL  
47-NK-cells GSM258732.CEL  
46-NK-cells GSM258731.CEL  
45-Mast-cells-IgE+Ad GSM258718.CEL  
44-Mast-cells-IgE+Ad GSM258717.CEL  
43-Mast-cells-IgE GSM258714.CEL  
42-Mast-cells-IgE GSM258713.CEL  
41-Mast-cells GSM258712.CEL  
40-Granulocytes GSM258668.CEL  
39-Granulocytes GSM258667.CEL  
38-GMP GSM258666.CEL  
37-GMP GSM258665.CEL  
36-GMP GSM258665.CEL  
35-CMP GSM258642.CEL  
34-CMP GSM258641.CEL  
33-MEP GSM258720.CEL  
32-MEP GSM258719.CEL  
31-HESC GSM258770.CEL  
30-HESC GSM258770.CEL  
29-Bone marrow GSM258628.CEL  
28-Bone marrow GSM258627.CEL  
27-Paneth-cells-GF-1 GSM116358.CEL  
26-Paneth-cells-GF-1 GSM116357.CEL  
25-Paneth-cells GSM116350.CEL  
24-Paneth-cells GSM116359.CEL  
23-Paneth-cells GSM318589.CEL  
22-Paneth-cells GSM318590.CEL  
21-Colon-Crypt GSM480375.CEL  
20-Colon-Crypt GSM480374.CEL  
19-Colon-Vill GSM480363.CEL  
18-Colon-Vill GSM480362.CEL  
17-Colon-IEC-GF GSM349880.CEL  
16-Colon-IEC-GF GSM350375.CEL  
15-Ileum-IEC-GF GSM350376.CEL  
14-Ileum-IEC GSM350371.CEL  
13-Small-intestine-epithelium RMINEP002901.CEL  
12-Small-intestine-epithelium RMINEP001001.CEL  
11-FAE-RMPYEP002001.CEL  
10-FAE-RMPYEP001001.CEL  
09-Ileum-IEC GSM190797.CEL  
08-Ileum-IEC GSM190796.CEL  
07-Ileum-IEC GSM190795.CEL  
06-CT-v-M-cells GSM190794.CEL  
05-CT-v-M-cells GSM190793.CEL  
04-CT-v-M-cells GSM190792.CEL  
03-PP-M-cells GSM190791.CEL  
02-PP-M-cells GSM190790.CEL  
01-PP-M-cells GSM190789.CEL



Cluster0315\_High in osteoblasts (7 nodes)

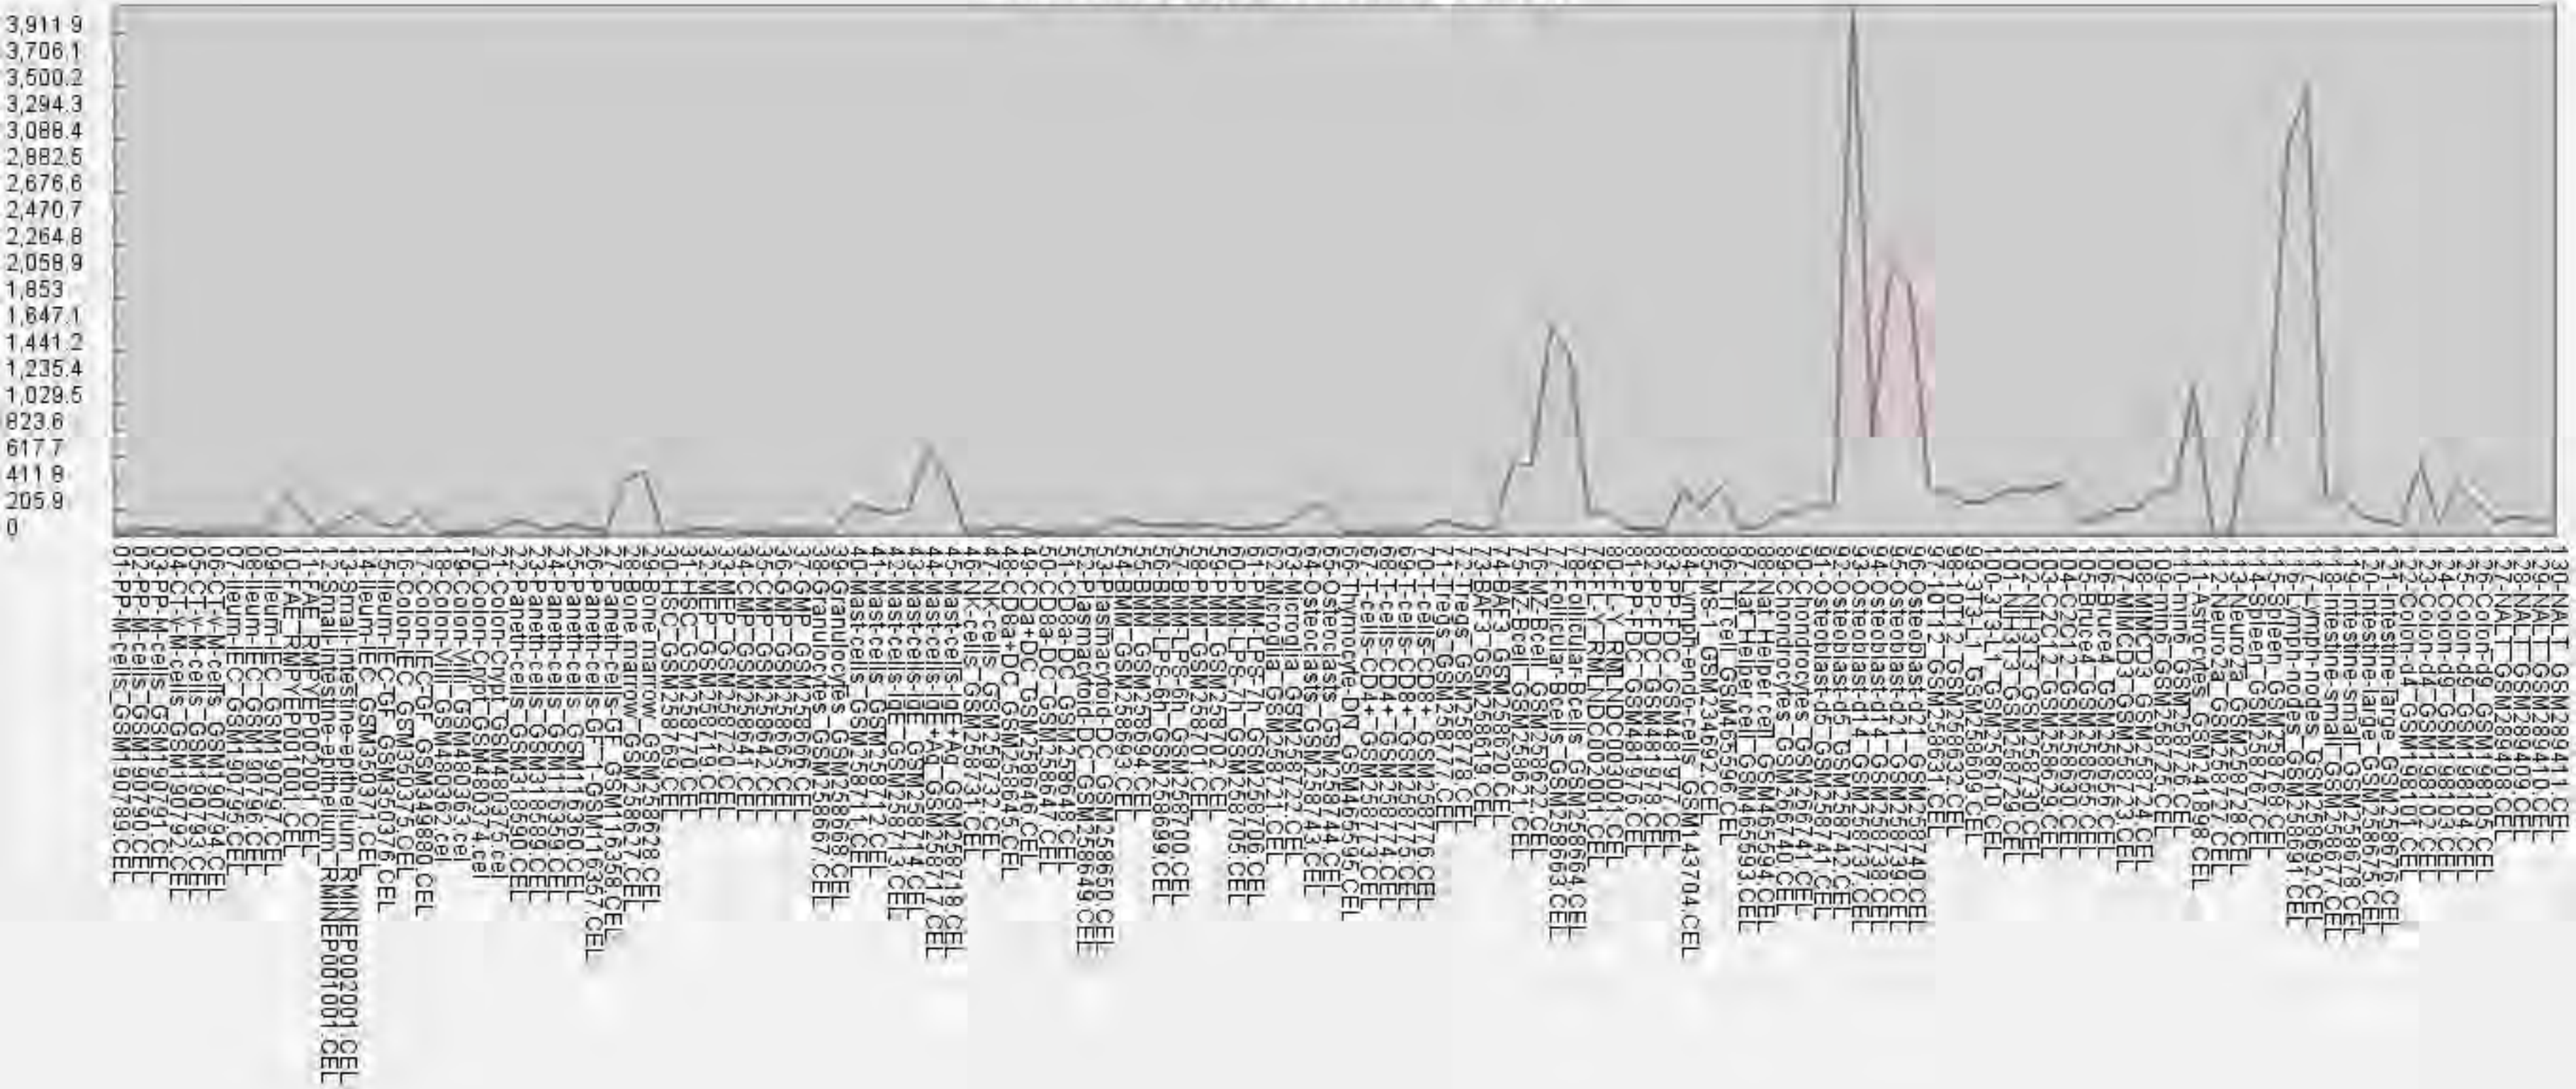



Cluster0316\_High in 10T12 cells and astrocytes (7 nodes)

662.5  
 827.7  
 592.8  
 557.9  
 523.1  
 488.2  
 453.3  
 418.5  
 383.6  
 348.7  
 313.8  
 279  
 244.1  
 209.2  
 174.4  
 139.5  
 104.6  
 69.7  
 34.9  
 0

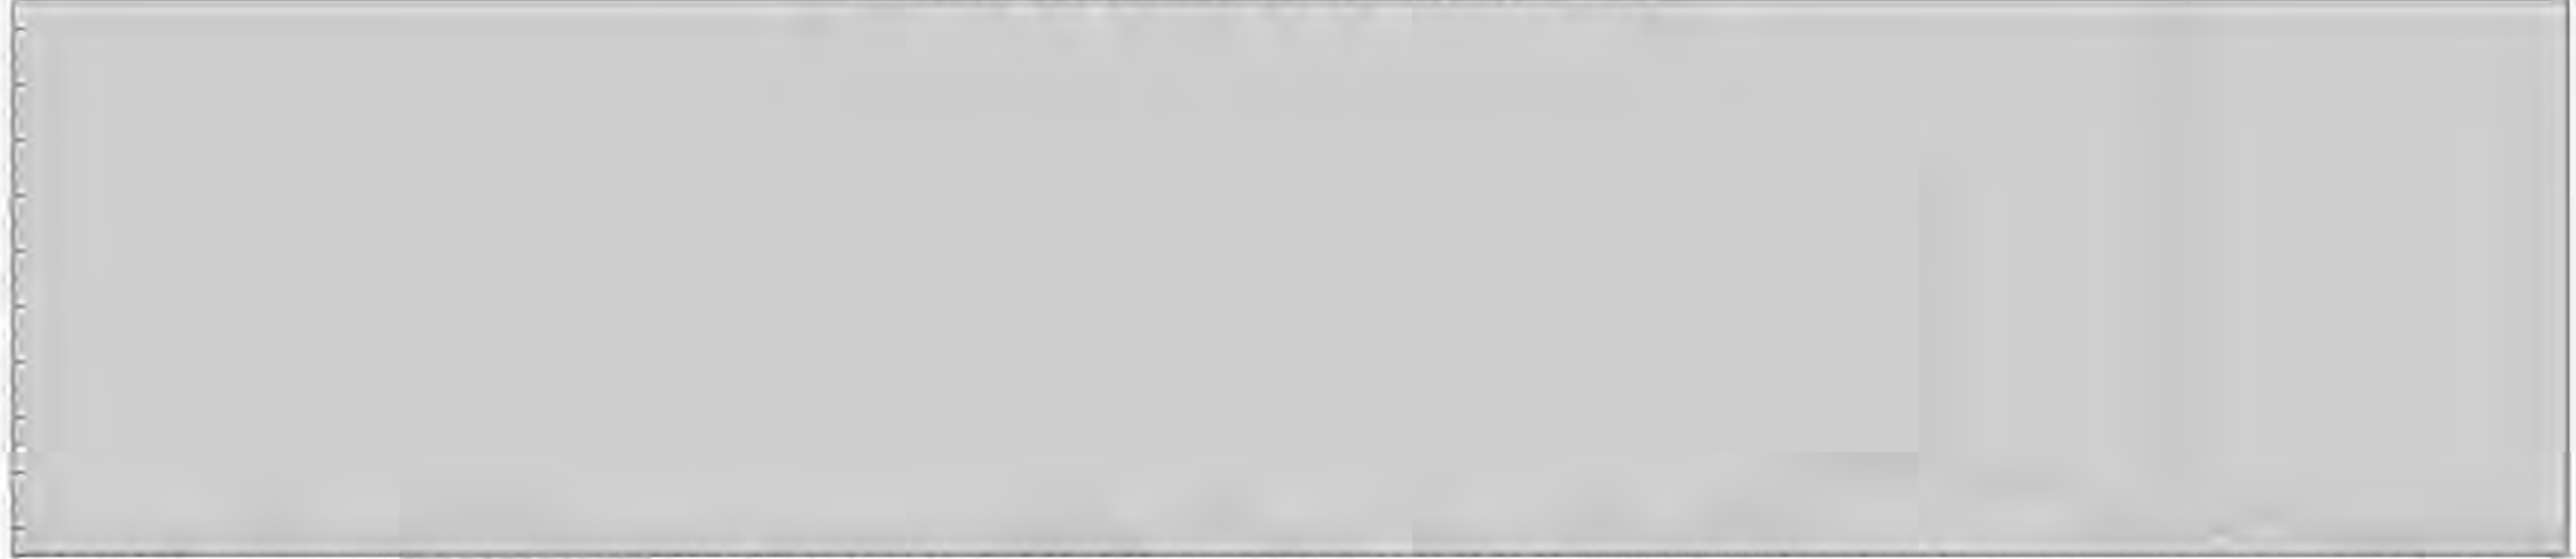

30-NALT GSM289411 CEL  
 29-NALT GSM289410 CEL  
 28-NALT GSM289409 CEL  
 27-NALT GSM289408 CEL  
 26-Color-d9 GSM1988105 CEL  
 25-Color-d9 GSM1988104 CEL  
 24-Color-d9 GSM1988103 CEL  
 23-Color-d4 GSM1988102 CEL  
 22-Color-d4 GSM1988101 CEL  
 21-Intestine-large GSM258676 CEL  
 20-Intestine-large GSM258675 CEL  
 19-Intestine-small GSM258674 CEL  
 18-Intestine-small GSM258673 CEL  
 17-Lymph-nodes GSM258672 CEL  
 16-Spleen GSM258671 CEL  
 15-Spleen GSM258670 CEL  
 14-Neuro2a GSM241898 CEL  
 13-Astrocytes GSM241897 CEL  
 12-mimb GSM258726 CEL  
 11-mimb GSM258725 CEL  
 10-mimb GSM258724 CEL  
 09-MIMCD3 GSM258723 CEL  
 08-MIMCD3 GSM258722 CEL  
 07-Bruce4 GSM258699 CEL  
 06-Bruce4 GSM258698 CEL  
 05-C2C12 GSM258697 CEL  
 04-C2C12 GSM258696 CEL  
 03-NH3T3 GSM258730 CEL  
 02-NH3T3 GSM258729 CEL  
 01-3T3-L1 GSM258610 CEL  
 99-3T3-L1 GSM258609 CEL  
 98-10T12 GSM258632 CEL  
 97-10T12 GSM258631 CEL  
 96-Osteoblast-d21 GSM258740 CEL  
 95-Osteoblast-d21 GSM258739 CEL  
 94-Osteoblast-d14 GSM258738 CEL  
 93-Osteoblast-d14 GSM258737 CEL  
 92-Osteoblast-d5 GSM258742 CEL  
 91-Osteoblast-d5 GSM258741 CEL  
 90-Chondrocytes GSM266741 CEL  
 89-Chondrocytes GSM266740 CEL  
 88-Nat\_Helper cell GSM465594 CEL  
 87-Nat\_Helper cell GSM465593 CEL  
 86-LT cell GSM465596 CEL  
 85-MS-1 GSM234692 CEL  
 84-Lymph-endo-cells GSM143704 CEL  
 83-P-FDC GSM481977 CEL  
 82-P-FDC GSM481978 CEL  
 81-P-FDC GSM481976 CEL  
 80-L-Y-RMLND C002001 CEL  
 79-L-Y-RMLND C002001 CEL  
 78-Follicular-B cells GSM258654 CEL  
 77-Follicular-B cells GSM258653 CEL  
 76-MZ-Bcell GSM258622 CEL  
 75-MZ-Bcell GSM258621 CEL  
 74-BAF3 GSM258620 CEL  
 73-BAF3 GSM258619 CEL  
 72-Tregs GSM258778 CEL  
 71-Tregs GSM258777 CEL  
 70-T-cells-CD8+ GSM258776 CEL  
 69-T-cells-CD8+ GSM258774 CEL  
 68-T-cells-CD4+ GSM258773 CEL  
 67-T-cells-CD4+ GSM258744 CEL  
 66-Thymocyte-DN GSM465595 CEL  
 65-Osteoclasts GSM258743 CEL  
 64-Microglia GSM258721 CEL  
 63-Microglia GSM258721 CEL  
 62-MM-LPS-7h GSM258705 CEL  
 61-MM-LPS-7h GSM258705 CEL  
 60-MM-LPS-6h GSM258702 CEL  
 59-MM-LPS-6h GSM258702 CEL  
 58-MM-LPS-6h GSM258699 CEL  
 57-MM-LPS-6h GSM258699 CEL  
 56-MM-LPS-6h GSM258694 CEL  
 55-MM-LPS-6h GSM258694 CEL  
 54-Plasmacytoid-DC GSM258650 CEL  
 53-Plasmacytoid-DC GSM258649 CEL  
 52-CD8a-DC GSM258647 CEL  
 51-CD8a-DC GSM258647 CEL  
 50-CD8a+DC GSM258646 CEL  
 49-CD8a+DC GSM258646 CEL  
 48-NK-cells GSM258732 CEL  
 47-NK-cells GSM258731 CEL  
 46-Mast-cells-IdU+Ad GSM258718 CEL  
 45-Mast-cells-IdU+Ad GSM258717 CEL  
 44-Mast-cells-IdU GSM258714 CEL  
 43-Mast-cells-IdU GSM258713 CEL  
 42-Mast-cells GSM258712 CEL  
 41-Mast-cells GSM258712 CEL  
 40-Granulocytes GSM258667 CEL  
 39-Granulocytes GSM258667 CEL  
 38-GMP GSM258666 CEL  
 37-GMP GSM258665 CEL  
 36-GMP GSM258665 CEL  
 35-GMP GSM258642 CEL  
 34-MIEP GSM258642 CEL  
 33-MIEP GSM258641 CEL  
 32-MIEP GSM258641 CEL  
 31-HESC GSM258770 CEL  
 30-HESC GSM258770 CEL  
 29-Bone marrow GSM258628 CEL  
 28-Bone marrow GSM258627 CEL  
 27-Paneth-cells-GF-1 GSM116357 CEL  
 26-Paneth-cells-GF-1 GSM116357 CEL  
 25-Paneth-cells GSM116350 CEL  
 24-Paneth-cells GSM116350 CEL  
 23-Paneth-cells GSM318589 CEL  
 22-Paneth-cells GSM318589 CEL  
 21-Color-Crypt GSM480375 cel  
 20-Color-Crypt GSM480374 cel  
 19-Color-Vill GSM480363 cel  
 18-Color-Vill GSM480362 cel  
 17-Color-IEC-GF GSM349880 CEL  
 16-Color-IEC-GF GSM350375 CEL  
 15-Ileum-IEC-GF GSM350376 CEL  
 14-Ileum-IEC GSM350371 CEL  
 13-Small-intestine-epithelium\_RMINEP002001 CEL  
 12-Small-intestine-epithelium\_RMINEP001001 CEL  
 11-FAE-RMPYEP002001 CEL  
 10-FAE-RMPYEP001001 CEL  
 09-Ileum-IEC GSM190797 CEL  
 08-Ileum-IEC GSM190796 CEL  
 07-Ileum-IEC GSM190795 CEL  
 06-CT-w-M-cells GSM190794 CEL  
 05-CT-w-M-cells GSM190793 CEL  
 04-CT-y-M-cells GSM190792 CEL  
 03-PP-M-cells GSM190791 CEL  
 02-PP-M-cells GSM190790 CEL  
 01-PP-M-cells GSM190789 CEL



Cluster0317\_intestine-related (7 nodes)

2,054.2  
1,948.1  
1,837.9  
1,729.8  
1,621.7  
1,513.6  
1,405.5  
1,297.4  
1,189.3  
1,081.1  
973  
864.9  
756.8  
648.7  
540.6  
432.5  
324.3  
216.2  
108.1  
0

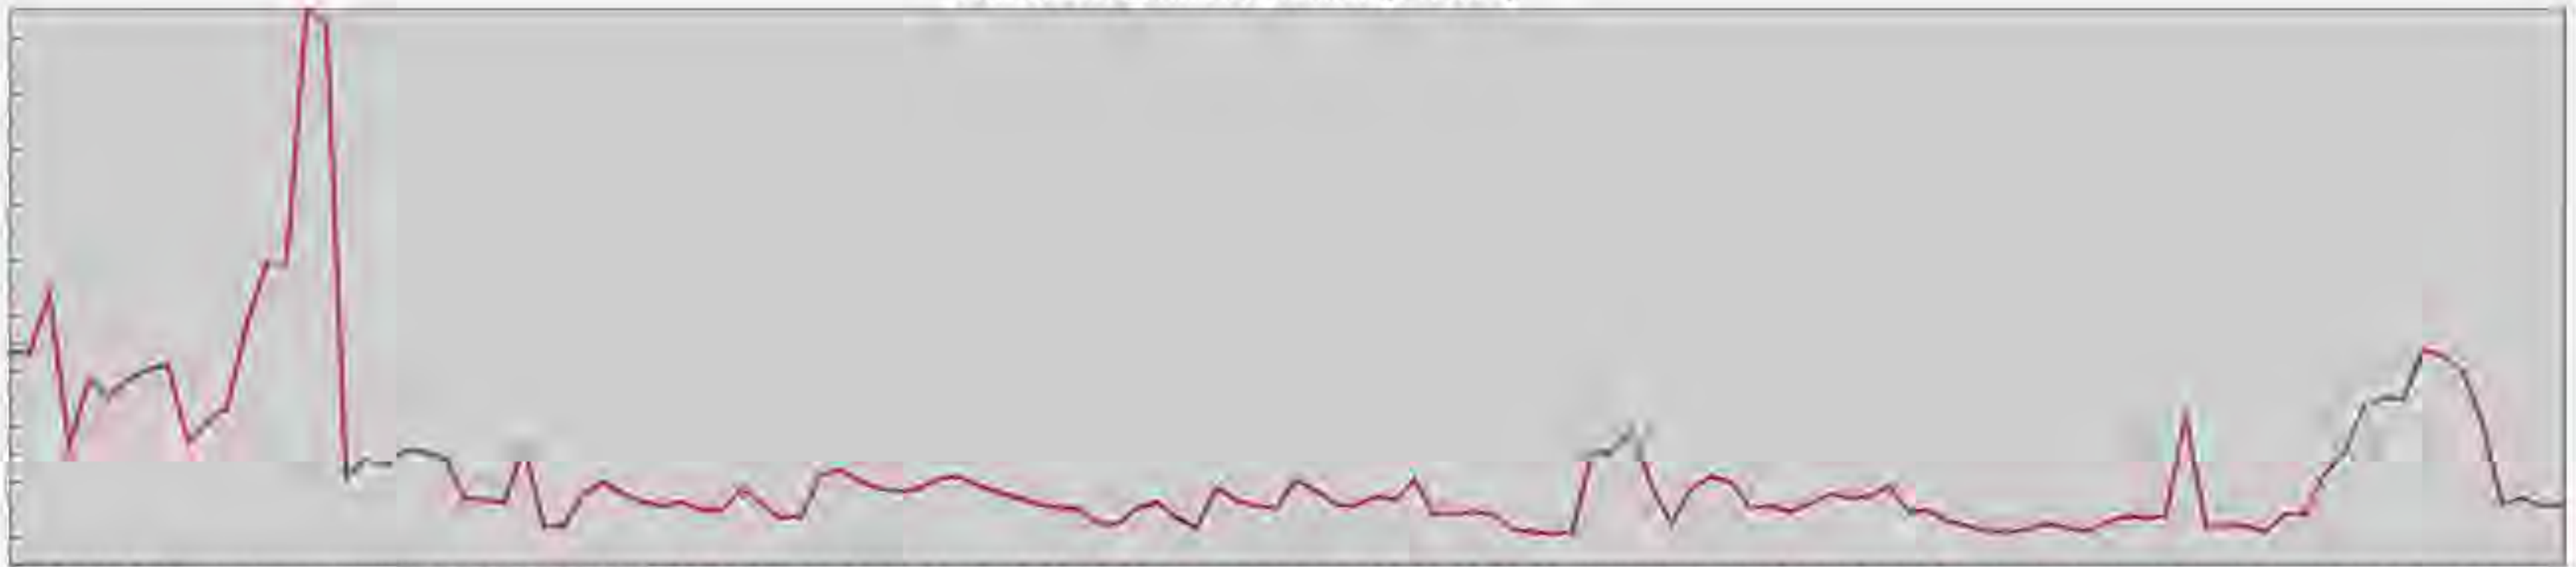

130-NALT GSM289411.CEL  
129-NALT GSM289410.CEL  
128-NALT GSM289409.CEL  
127-NALT GSM289408.CEL  
126-Colon-d9 GSM1988105.CEL  
125-Colon-d9 GSM1988104.CEL  
124-Colon-d9 GSM1988103.CEL  
123-Colon-d4 GSM1988102.CEL  
122-Colon-d4 GSM1988101.CEL  
121-Intestine-large GSM258676.CEL  
120-Intestine-large GSM258675.CEL  
119-Intestine-small GSM258674.CEL  
118-Intestine-small GSM258673.CEL  
117-Lymph-nodes GSM258672.CEL  
116-Lymph-nodes GSM258671.CEL  
115-Spleen GSM258767.CEL  
114-Spleen GSM258766.CEL  
113-Neuro2a GSM258728.CEL  
112-Neuro2a GSM258727.CEL  
111-Astrocytes GSM241898.CEL  
110-mimb GSM258726.CEL  
109-mimb GSM258725.CEL  
108-MIMCD3 GSM258724.CEL  
107-MIMCD3 GSM258723.CEL  
106-Bruce4 GSM258665.CEL  
105-Bruce4 GSM258664.CEL  
104-C2C12 GSM258690.CEL  
103-C2C12 GSM258689.CEL  
102-NH3T3 GSM258730.CEL  
101-NH3T3 GSM258729.CEL  
100-3T3-L1 GSM258610.CEL  
99-3T3-L1 GSM258609.CEL  
98-10T12 GSM258632.CEL  
97-10T12 GSM258631.CEL  
96-Osteoblast-d21 GSM258740.CEL  
95-Osteoblast-d21 GSM258739.CEL  
94-Osteoblast-d14 GSM258738.CEL  
93-Osteoblast-d14 GSM258737.CEL  
92-Osteoblast-d5 GSM258742.CEL  
91-Osteoblast-d5 GSM258741.CEL  
90-Chondrocytes GSM266741.CEL  
89-Chondrocytes GSM266740.CEL  
88-Nat Helper cell GSM465594.CEL  
87-Nat Helper cell GSM465593.CEL  
86-LT cell GSM465596.CEL  
85-MS-1 GSM234692.CEL  
84-Lymph-endo-cells GSM143704.CEL  
83-PP-FDC GSM481977.CEL  
82-PP-FDC GSM481976.CEL  
81-PP-FDC GSM481975.CEL  
80-LY-RMLNDCC003001.CEL  
79-LY-RMLNDCC003001.CEL  
78-Follicular-Bcells GSM258664.CEL  
77-Follicular-Bcells GSM258663.CEL  
76-MZ-Bcell GSM258622.CEL  
75-MZ-Bcell GSM258621.CEL  
74-BAF3 GSM258620.CEL  
73-BAF3 GSM258619.CEL  
72-Tregs GSM258778.CEL  
71-Tregs GSM258777.CEL  
70-T-cells-CD8+ GSM258776.CEL  
69-T-cells-CD8+ GSM258775.CEL  
68-T-cells-CD4+ GSM258774.CEL  
67-T-cells-CD4+ GSM258773.CEL  
66-Thymocyte-DN GSM465595.CEL  
65-Osteoclasts GSM258743.CEL  
64-Osteoclasts GSM258743.CEL  
63-Microglia GSM258721.CEL  
62-Microglia GSM258721.CEL  
61-PM-M-PS-7h GSM268706.CEL  
60-PM-M-PS-7h GSM268705.CEL  
59-PM-M-PS-6h GSM258702.CEL  
58-PM-M-PS-6h GSM258701.CEL  
57-BMM-LPS-6h GSM258699.CEL  
56-BMM-LPS-6h GSM258699.CEL  
55-BMM-LPS-6h GSM258699.CEL  
54-BMM-LPS-6h GSM258699.CEL  
53-Iasmacryoid-DC GSM258650.CEL  
52-Iasmacryoid-DC GSM258649.CEL  
51-CD8a-DC GSM258648.CEL  
50-CD8a-DC GSM258647.CEL  
49-CD8a+DC GSM258646.CEL  
48-CD8a+DC GSM258646.CEL  
47-NK-cells GSM258732.CEL  
46-NK-cells GSM258731.CEL  
45-Mast-cells-IgE+Ad GSM258718.CEL  
44-Mast-cells-IgE+Ad GSM258717.CEL  
43-Mast-cells-IgE GSM258714.CEL  
42-Mast-cells-IgE GSM258713.CEL  
41-Mast-cells GSM258712.CEL  
40-Granulocytes GSM258668.CEL  
39-Granulocytes GSM258667.CEL  
38-GMP GSM258666.CEL  
37-GMP GSM258665.CEL  
36-GMP GSM258664.CEL  
35-CMP GSM258642.CEL  
34-MEP GSM258641.CEL  
33-MEP GSM258720.CEL  
32-MEP GSM258719.CEL  
31-HESC GSM258770.CEL  
30-HESC GSM258769.CEL  
29-Bone marrow GSM258628.CEL  
28-Bone marrow GSM258627.CEL  
27-paneth-cells-GE GSM116358.CEL  
26-paneth-cells-GE GSM116357.CEL  
25-paneth-cells GSM116350.CEL  
24-paneth-cells GSM116359.CEL  
23-paneth-cells GSM318589.CEL  
22-paneth-cells GSM318590.CEL  
21-paneth-cells GSM480375.CEL  
20-paneth-cells GSM480374.CEL  
19-paneth-cells GSM480363.CEL  
18-paneth-cells GSM480362.CEL  
17-paneth-cells GSM349880.CEL  
16-paneth-cells GSM350375.CEL  
15-paneth-cells GSM350376.CEL  
14-paneth-cells GSM350371.CEL  
13-paneth-cells GSM258627.CEL  
12-paneth-cells GSM116357.CEL  
11-paneth-cells GSM116358.CEL  
10-paneth-cells GSM116359.CEL  
09-paneth-cells GSM116359.CEL  
08-paneth-cells GSM116359.CEL  
07-paneth-cells GSM116359.CEL  
06-paneth-cells GSM116359.CEL  
05-paneth-cells GSM116359.CEL  
04-paneth-cells GSM116359.CEL  
03-paneth-cells GSM116359.CEL  
02-paneth-cells GSM116359.CEL  
01-paneth-cells GSM116359.CEL



Cluster0318\_High in Peyer's patches FDC (7 nodes)

406.6  
385.2  
363.8  
342.4  
321  
299.8  
278.2  
256.8  
235.4  
214  
192.6  
171.2  
149.8  
128.4  
107  
85.6  
64.2  
42.8  
21.4  
0

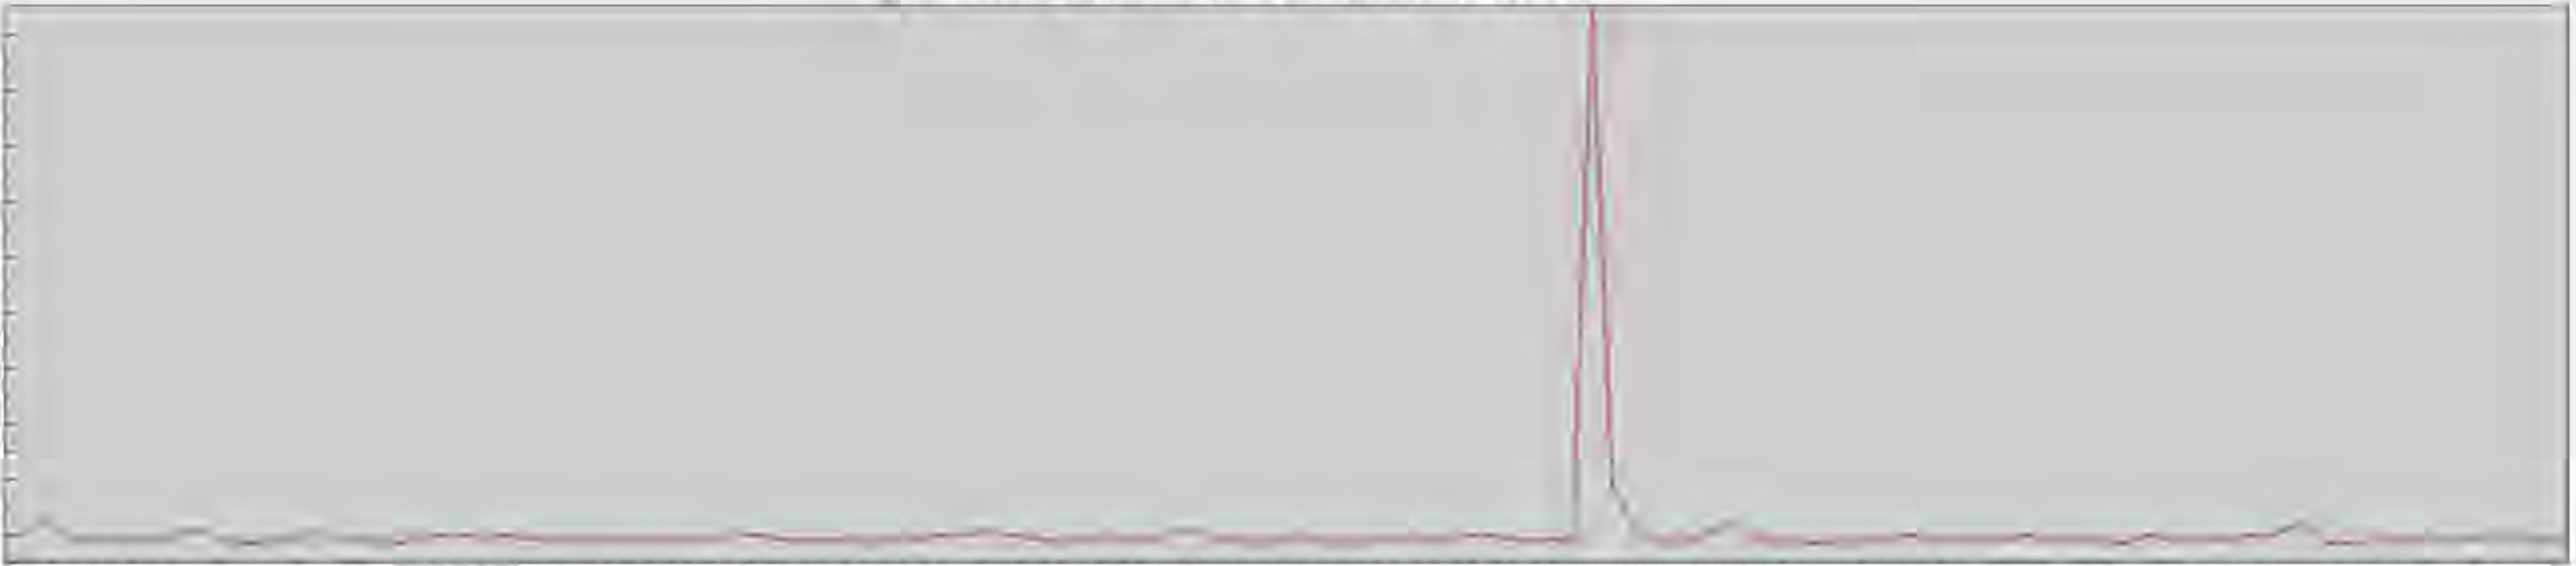

|     |                            |              |     |
|-----|----------------------------|--------------|-----|
| 30  | NALT                       | GSM289411    | CEL |
| 129 | NALT                       | GSM289410    | CEL |
| 128 | NALT                       | GSM289409    | CEL |
| 127 | NALT                       | GSM289408    | CEL |
| 126 | Colon-d9                   | GSM1988105   | CEL |
| 125 | Colon-d9                   | GSM1988104   | CEL |
| 124 | Colon-d9                   | GSM1988103   | CEL |
| 123 | Colon-d4                   | GSM1988102   | CEL |
| 122 | Colon-d4                   | GSM1988101   | CEL |
| 121 | Intestine-large            | GSM258676    | CEL |
| 120 | Intestine-large            | GSM258675    | CEL |
| 119 | Intestine-small            | GSM258678    | CEL |
| 118 | Intestine-small            | GSM258679    | CEL |
| 117 | Lymph-nodes                | GSM258691    | CEL |
| 116 | Spleen                     | GSM258768    | CEL |
| 115 | Spleen                     | GSM258767    | CEL |
| 114 | Neuro2a                    | GSM258728    | CEL |
| 113 | Neuro2a                    | GSM258727    | CEL |
| 112 | Astrocytes                 | GSM241898    | CEL |
| 111 | ming6                      | GSM258726    | CEL |
| 110 | ming6                      | GSM258725    | CEL |
| 109 | ming6                      | GSM258724    | CEL |
| 108 | MIMCD3                     | GSM258723    | CEL |
| 107 | MIMCD3                     | GSM258722    | CEL |
| 106 | Bruce4                     | GSM258656    | CEL |
| 105 | Bruce4                     | GSM258655    | CEL |
| 104 | C2C12                      | GSM258690    | CEL |
| 103 | C2C12                      | GSM258689    | CEL |
| 102 | NH3T3                      | GSM258730    | CEL |
| 101 | NH3T3                      | GSM258729    | CEL |
| 100 | 3T3-L1                     | GSM258610    | CEL |
| 99  | 3T3-L1                     | GSM258609    | CEL |
| 98  | 10T12                      | GSM258632    | CEL |
| 97  | 10T12                      | GSM258631    | CEL |
| 96  | Osteoblast-d21             | GSM258740    | CEL |
| 95  | Osteoblast-d21             | GSM258739    | CEL |
| 94  | Osteoblast-d14             | GSM258738    | CEL |
| 93  | Osteoblast-d14             | GSM258737    | CEL |
| 92  | Osteoblast-d5              | GSM258742    | CEL |
| 91  | Osteoblast-d5              | GSM258741    | CEL |
| 90  | Chondrocytes               | GSM266741    | CEL |
| 89  | Chondrocytes               | GSM266740    | CEL |
| 88  | Nat Helper cell            | GSM465594    | CEL |
| 87  | Nat Helper cell            | GSM465593    | CEL |
| 86  | Tt cell                    | GSM465596    | CEL |
| 85  | MS-1                       | GSM234692    | CEL |
| 84  | Lymph-endo-cells           | GSM143704    | CEL |
| 83  | PP-FDC                     | GSM481977    | CEL |
| 82  | PP-FDC                     | GSM481978    | CEL |
| 81  | PP-FDC                     | GSM481976    | CEL |
| 80  | E-LY                       | RMLNDC003001 | CEL |
| 79  | E-LY                       | RMLNDC003001 | CEL |
| 78  | Follicular-Bcells          | GSM258664    | CEL |
| 77  | Follicular-Bcells          | GSM258663    | CEL |
| 76  | MZ-Bcell                   | GSM258622    | CEL |
| 75  | MZ-Bcell                   | GSM258621    | CEL |
| 74  | BAF3                       | GSM258620    | CEL |
| 73  | BAF3                       | GSM258619    | CEL |
| 72  | Tregs                      | GSM258778    | CEL |
| 71  | Tregs                      | GSM258777    | CEL |
| 70  | T-cells-CD8+               | GSM258776    | CEL |
| 69  | T-cells-CD8+               | GSM258775    | CEL |
| 68  | T-cells-CD4+               | GSM258774    | CEL |
| 67  | T-cells-CD4+               | GSM258773    | CEL |
| 66  | Thymocyte-DN               | GSM465595    | CEL |
| 65  | Osteoclasts                | GSM258743    | CEL |
| 64  | Microglia                  | GSM258721    | CEL |
| 63  | Microglia                  | GSM258721    | CEL |
| 62  | MM-LPS-7h                  | GSM258706    | CEL |
| 61  | MM-LPS-7h                  | GSM258705    | CEL |
| 60  | MM-LPS-6h                  | GSM258702    | CEL |
| 59  | MM-LPS-6h                  | GSM258701    | CEL |
| 58  | MM-LPS-6h                  | GSM258699    | CEL |
| 57  | MM-LPS-6h                  | GSM258699    | CEL |
| 56  | MM-LPS-6h                  | GSM258694    | CEL |
| 55  | MM-LPS-6h                  | GSM258694    | CEL |
| 54  | MM-LPS-6h                  | GSM258694    | CEL |
| 53  | MM-LPS-6h                  | GSM258694    | CEL |
| 52  | MM-LPS-6h                  | GSM258694    | CEL |
| 51  | MM-LPS-6h                  | GSM258694    | CEL |
| 50  | CD8a-DC                    | GSM258647    | CEL |
| 49  | CD8a-DC                    | GSM258647    | CEL |
| 48  | CD8a+DC                    | GSM258646    | CEL |
| 47  | NK-cells                   | GSM258732    | CEL |
| 46  | NK-cells                   | GSM258731    | CEL |
| 45  | Mast-cells-IgE+Ad          | GSM258718    | CEL |
| 44  | Mast-cells-IgE+Ad          | GSM258717    | CEL |
| 43  | Mast-cells-IgE             | GSM258714    | CEL |
| 42  | Mast-cells-IgE             | GSM258713    | CEL |
| 41  | Mast-cells                 | GSM258712    | CEL |
| 40  | Granulocytes               | GSM258668    | CEL |
| 39  | Granulocytes               | GSM258667    | CEL |
| 38  | GMP                        | GSM258666    | CEL |
| 37  | GMP                        | GSM258665    | CEL |
| 36  | GMP                        | GSM258665    | CEL |
| 35  | GMP                        | GSM258664    | CEL |
| 34  | GMP                        | GSM258664    | CEL |
| 33  | MIEP                       | GSM258770    | CEL |
| 32  | MIEP                       | GSM258770    | CEL |
| 31  | HESC                       | GSM258770    | CEL |
| 30  | HESC                       | GSM258770    | CEL |
| 29  | Bone marrow                | GSM258628    | CEL |
| 28  | bone marrow                | GSM258627    | CEL |
| 27  | paneth-cells-GE            | GSM116358    | CEL |
| 26  | paneth-cells-GE            | GSM116357    | CEL |
| 25  | paneth-cells               | GSM116350    | CEL |
| 24  | paneth-cells               | GSM116359    | CEL |
| 23  | paneth-cells               | GSM318589    | CEL |
| 22  | paneth-cells               | GSM318590    | CEL |
| 21  | Colon-Crypt                | GSM480375    | CEL |
| 20  | Colon-Crypt                | GSM480374    | CEL |
| 19  | Colon-Vill                 | GSM480363    | CEL |
| 18  | Colon-Vill                 | GSM480362    | CEL |
| 17  | Colon-IEC-Gf               | GSM349880    | CEL |
| 16  | Colon-IEC-Gf               | GSM350375    | CEL |
| 15  | Ileum-IEC                  | GSM350376    | CEL |
| 14  | Ileum-IEC                  | GSM350371    | CEL |
| 13  | Small-intestine-epithelium | RMINEP002901 | CEL |
| 12  | Small-intestine-epithelium | RMINEP001001 | CEL |
| 11  | FAE-RMPYEP001001           | CEL          |     |
| 10  | FAE-RMPYEP001001           | CEL          |     |
| 09  | Ileum-IEC                  | GSM190797    | CEL |
| 08  | Ileum-IEC                  | GSM190796    | CEL |
| 07  | Ileum-IEC                  | GSM190795    | CEL |
| 06  | CT-w-M-cells               | GSM190794    | CEL |
| 05  | CT-w-M-cells               | GSM190793    | CEL |
| 04  | CT-y-M-cells               | GSM190792    | CEL |
| 03  | PP-M-cells                 | GSM190791    | CEL |
| 02  | PP-M-cells                 | GSM190790    | CEL |
| 01  | PP-M-cells                 | GSM190789    | CEL |



Cluster0319\_Uncertain (7 nodes)

787.6  
746.1  
704.7  
663.2  
621.8  
580.3  
538.9  
497.4  
456  
414.5  
373.1  
331.6  
290.2  
248.7  
207.3  
165.8  
124.4  
82.9  
41.5  
0

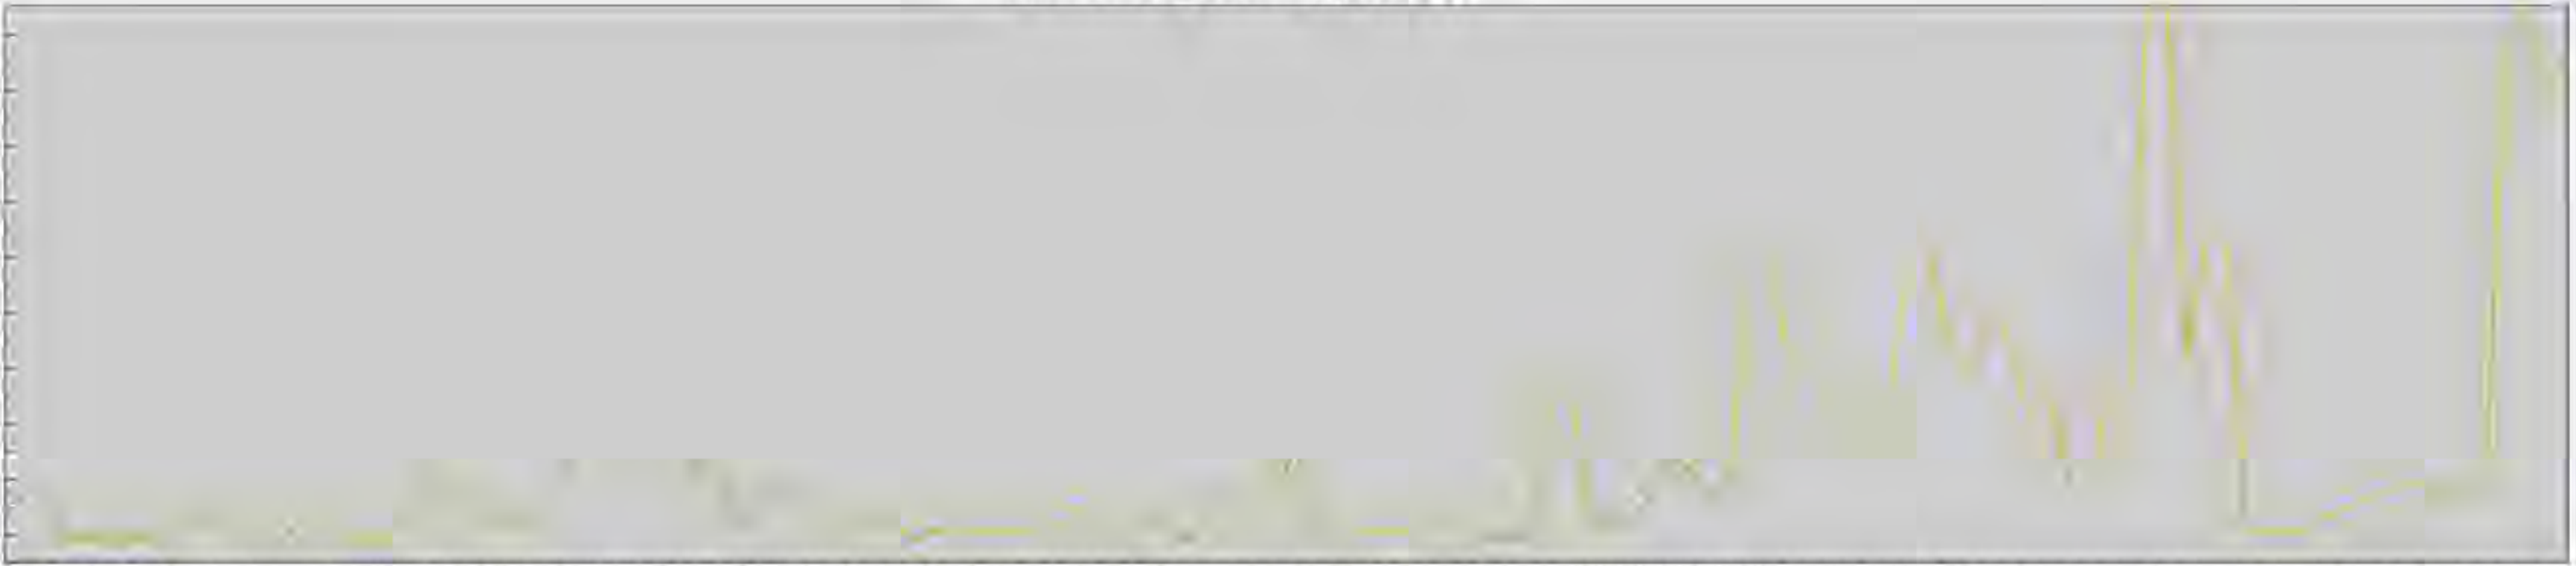

130-NALT GSM2894110.CEL  
 129-NALT GSM289410.CEL  
 128-NALT GSM289409.CEL  
 127-NALT GSM289408.CEL  
 126-Colon-d9 GSM1988105.CEL  
 125-Colon-d9 GSM1988104.CEL  
 124-Colon-d9 GSM1988103.CEL  
 123-Colon-d4 GSM1988102.CEL  
 122-Colon-d4 GSM1988101.CEL  
 121-Intestine-large GSM258676.CEL  
 120-Intestine-large GSM258675.CEL  
 119-Intestine-small GSM258674.CEL  
 118-Intestine-small GSM258673.CEL  
 117-Lymph-nodes GSM258672.CEL  
 116-Lymph-nodes GSM258671.CEL  
 115-Spleen GSM258768.CEL  
 114-Spleen GSM258767.CEL  
 113-Neuro2a GSM258728.CEL  
 112-Neuro2a GSM258727.CEL  
 111-Astrocytes GSM241898.CEL  
 110-mim6 GSM258726.CEL  
 109-mim6 GSM258725.CEL  
 108-MIMCD3 GSM258724.CEL  
 107-MIMCD3 GSM258723.CEL  
 106-Bruce4 GSM258656.CEL  
 105-Bruce4 GSM258655.CEL  
 104-C2C12 GSM258690.CEL  
 103-C2C12 GSM258689.CEL  
 102-NH3T3 GSM258739.CEL  
 101-NH3T3 GSM258738.CEL  
 100-3T3-L1 GSM258610.CEL  
 99-3T3-L1 GSM258609.CEL  
 98-10T12 GSM258632.CEL  
 97-10T12 GSM258631.CEL  
 96-Osteoblast-d21 GSM258740.CEL  
 95-Osteoblast-d21 GSM258739.CEL  
 94-Osteoblast-d14 GSM258738.CEL  
 93-Osteoblast-d14 GSM258737.CEL  
 92-Osteoblast-d5 GSM258742.CEL  
 91-Osteoblast-d5 GSM258741.CEL  
 90-Chondrocytes GSM266741.CEL  
 89-Chondrocytes GSM266740.CEL  
 88-Nat Helper cell GSM465594.CEL  
 87-Nat Helper cell GSM465593.CEL  
 86-TT cell GSM465596.CEL  
 85-MS-1 GSM234692.CEL  
 84-Lymph-endo-cells GSM143704.CEL  
 83-PP-FDC GSM481977.CEL  
 82-PP-FDC GSM481978.CEL  
 81-PP-FDC GSM481976.CEL  
 80-F-LY RMLNDCC003001.CEL  
 79-F-LY RMLNDCC003001.CEL  
 78-Follicular-Bcells GSM258664.CEL  
 77-Follicular-Bcells GSM258663.CEL  
 76-MZ-Bcell GSM258627.CEL  
 75-MZ-Bcell GSM258627.CEL  
 74-BAF3 GSM258620.CEL  
 73-BAF3 GSM258619.CEL  
 72-Tregs GSM258778.CEL  
 71-Tregs GSM258777.CEL  
 70-T-cells-CD8+ GSM258776.CEL  
 69-T-cells-CD8+ GSM258774.CEL  
 68-T-cells-CD4+ GSM258773.CEL  
 67-T-cells-CD4+ GSM258773.CEL  
 66-Thymocyte-DN GSM465595.CEL  
 65-Osteoclasts GSM258744.CEL  
 64-Osteoclasts GSM258743.CEL  
 63-Microglia GSM258721.CEL  
 62-Microglia GSM258721.CEL  
 61-PM-M-PS-7h GSM258706.CEL  
 60-PM-M-PS-7h GSM258706.CEL  
 59-PM-M-PS-6h GSM258702.CEL  
 58-PM-M-PS-6h GSM258702.CEL  
 57-BMM-LPS-6h GSM258699.CEL  
 56-BMM-LPS-6h GSM258699.CEL  
 55-BMM-LPS-6h GSM258699.CEL  
 54-BMM-LPS-6h GSM258699.CEL  
 53-Plasmacytoid-DC GSM258650.CEL  
 52-Plasmacytoid-DC GSM258649.CEL  
 51-CD8a-DC GSM258648.CEL  
 50-CD8a-DC GSM258647.CEL  
 49-CD8a+DC GSM258646.CEL  
 48-CD8a+DC GSM258646.CEL  
 47-NK-cells GSM258732.CEL  
 46-NK-cells GSM258731.CEL  
 45-Mast-cells-IgE+Ad GSM258718.CEL  
 44-Mast-cells-IgE+Ad GSM258717.CEL  
 43-Mast-cells-IgE GSM258714.CEL  
 42-Mast-cells-IgE GSM258713.CEL  
 41-Mast-cells GSM258712.CEL  
 40-Granulocytes GSM258668.CEL  
 39-Granulocytes GSM258667.CEL  
 38-GMP GSM258666.CEL  
 37-GMP GSM258666.CEL  
 36-GMP GSM258665.CEL  
 35-CMP GSM258642.CEL  
 34-CMP GSM258641.CEL  
 33-MEP GSM258720.CEL  
 32-MEP GSM258719.CEL  
 31-HESC GSM258770.CEL  
 30-HESC GSM258770.CEL  
 29-Bone marrow GSM258628.CEL  
 28-Bone marrow GSM258627.CEL  
 27-paneth-cells-GF-1 GSM116357.CEL  
 26-paneth-cells-GF-1 GSM116357.CEL  
 25-paneth-cells GSM116350.CEL  
 24-paneth-cells GSM116359.CEL  
 23-paneth-cells GSM318589.CEL  
 22-paneth-cells GSM318590.CEL  
 21-paneth-cells GSM318590.CEL  
 20-paneth-cells GSM318590.CEL  
 19-paneth-cells GSM480375.CEL  
 18-paneth-cells GSM480375.CEL  
 17-paneth-cells GSM480375.CEL  
 16-paneth-cells GSM480375.CEL  
 15-paneth-cells GSM349880.CEL  
 14-paneth-cells GSM350376.CEL  
 13-paneth-cells GSM350376.CEL  
 12-paneth-cells GSM350376.CEL  
 11-paneth-cells GSM350376.CEL  
 10-paneth-cells GSM350376.CEL  
 9-paneth-cells GSM350376.CEL  
 8-paneth-cells GSM350376.CEL  
 7-paneth-cells GSM350376.CEL  
 6-paneth-cells GSM350376.CEL  
 5-paneth-cells GSM350376.CEL  
 4-paneth-cells GSM350376.CEL  
 3-paneth-cells GSM350376.CEL  
 2-paneth-cells GSM350376.CEL  
 1-paneth-cells GSM350376.CEL







Cluster0321\_House keeping (7 nodes)

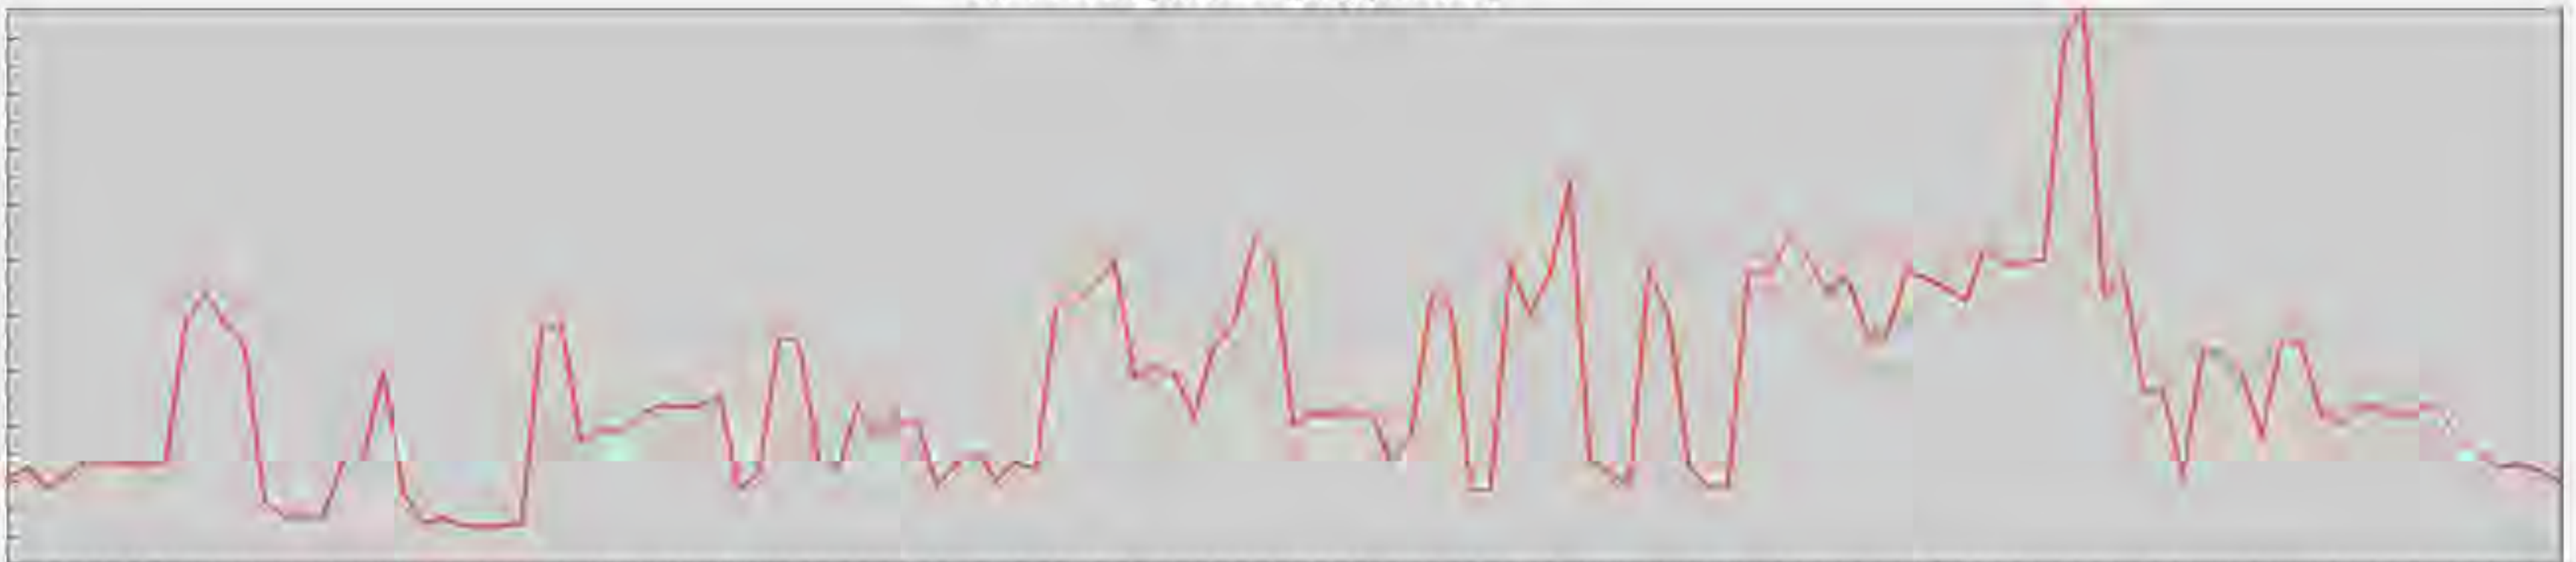

01-PP-M-cells\_GSM190789.CEL  
 02-PP-M-cells\_GSM190790.CEL  
 03-PP-M-cells\_GSM190791.CEL  
 04-CT-v-M-cells\_GSM190792.CEL  
 05-CT-v-M-cells\_GSM190793.CEL  
 06-CT-v-M-cells\_GSM190794.CEL  
 07-Ileum-IEC\_GSM190795.CEL  
 08-Ileum-IEC\_GSM190796.CEL  
 09-Ileum-IEC\_GSM190797.CEL  
 10-FAE-RMPYEP001001.CEL  
 11-FAE-RMPYEP002001.CEL  
 12-SmallIntestine-epithelium\_RMINEP001001.CEL  
 13-SmallIntestine-epithelium\_RMINEP002001.CEL  
 14-Ileum-IEC\_GSM350371.CEL  
 15-Ileum-IEC\_GSM350375.CEL  
 16-Colon-IEC-GF\_GSM349880.CEL  
 17-Colon-Vill-GSM480362.CEL  
 18-Colon-Vill-GSM480363.CEL  
 19-Colon-Vill-GSM480364.CEL  
 20-Colon-Crypt\_GSM480374.CEL  
 21-Colon-Crypt\_GSM480375.CEL  
 22-Paneth-cells\_GSM318590.CEL  
 23-Paneth-cells\_GSM318589.CEL  
 24-Paneth-cells\_GSM116359.CEL  
 25-Paneth-cells\_GSM116359.CEL  
 26-Paneth-cells-GF-1-GSM116357.CEL  
 27-Paneth-cells-GF-1-GSM116357.CEL  
 28-Bone marrow\_GSM258627.CEL  
 29-Bone marrow\_GSM258627.CEL  
 30-HSC\_GSM258770.CEL  
 31-HSC\_GSM258770.CEL  
 32-MEP\_GSM258719.CEL  
 33-MEP\_GSM258720.CEL  
 34-MEP\_GSM258641.CEL  
 35-MEP\_GSM258642.CEL  
 36-MEP\_GSM258665.CEL  
 37-MEP\_GSM258666.CEL  
 38-Granulocytes\_GSM258667.CEL  
 39-Granulocytes\_GSM258668.CEL  
 40-Mast-cells\_GSM258711.CEL  
 41-Mast-cells\_GSM258712.CEL  
 42-Mast-cells-GF-GSM258713.CEL  
 43-Mast-cells-GF+Ad-GSM258714.CEL  
 44-Mast-cells-GF+Ad-GSM258718.CEL  
 45-Mast-cells-GF+Ad-GSM258718.CEL  
 46-NK-cells\_GSM258731.CEL  
 47-NK-cells\_GSM258732.CEL  
 48-CD8a+DC\_GSM258645.CEL  
 49-CD8a+DC\_GSM258646.CEL  
 50-CD8a+DC\_GSM258647.CEL  
 51-CD8a+DC\_GSM258647.CEL  
 52-Plasmacytoid-DC\_GSM258649.CEL  
 53-Plasmacytoid-DC\_GSM258649.CEL  
 54-BMM-GSM258694.CEL  
 55-BMM-GSM258694.CEL  
 56-BMM-LPS-6h-GSM258699.CEL  
 57-BMM-LPS-6h-GSM258700.CEL  
 58-BMM-LPS-7h-GSM258702.CEL  
 59-BMM-LPS-7h-GSM258702.CEL  
 60-PMN-LPS-7h-GSM258706.CEL  
 61-PMN-LPS-7h-GSM258706.CEL  
 62-Microglia\_GSM258721.CEL  
 63-Microglia\_GSM258721.CEL  
 64-Osteoclasts\_GSM258743.CEL  
 65-Osteoclasts\_GSM258744.CEL  
 66-Thymocyte-DN\_GSM465595.CEL  
 67-T-cells-CD4+GSM258773.CEL  
 68-T-cells-CD4+GSM258774.CEL  
 69-T-cells-CD8+GSM258775.CEL  
 70-T-cells-CD8+GSM258777.CEL  
 71-Tregs\_GSM258778.CEL  
 72-Tregs\_GSM258778.CEL  
 73-BAF3\_GSM258619.CEL  
 74-BAF3\_GSM258620.CEL  
 75-MZ-Bcell\_GSM258621.CEL  
 76-MZ-Bcell\_GSM258622.CEL  
 77-Follicular-Bcells\_GSM258664.CEL  
 78-Follicular-Bcells\_GSM258664.CEL  
 79-FLY-RMLNDC002001.CEL  
 80-FLY-RMLNDC003001.CEL  
 81-PP-FDC\_GSM481976.CEL  
 82-PP-FDC\_GSM481978.CEL  
 83-PP-FDC\_GSM481977.CEL  
 84-Lymph-endo-cells\_GSM143704.CEL  
 85-MS-1\_GSM234692.CEL  
 86-LTcell\_GSM465596.CEL  
 87-NatHelper cell\_GSM465593.CEL  
 88-NatHelper cell\_GSM465594.CEL  
 89-Chondrocytes\_GSM266741.CEL  
 90-Chondrocytes\_GSM266740.CEL  
 91-Osteoblast-d5\_GSM258741.CEL  
 92-Osteoblast-d5\_GSM258742.CEL  
 93-Osteoblast-d14\_GSM258737.CEL  
 94-Osteoblast-d14\_GSM258738.CEL  
 95-Osteoblast-d21\_GSM258739.CEL  
 96-Osteoblast-d21\_GSM258739.CEL  
 97-10T12\_GSM258631.CEL  
 98-10T12\_GSM258631.CEL  
 99-3T3-L1\_GSM258609.CEL  
 100-3T3-L1\_GSM258610.CEL  
 101-NH3T3\_GSM258729.CEL  
 102-NH3T3\_GSM258730.CEL  
 103-C2C12\_GSM258629.CEL  
 104-C2C12\_GSM258630.CEL  
 105-Bruce4\_GSM258665.CEL  
 106-Bruce4\_GSM258665.CEL  
 107-MIMCD3\_GSM258723.CEL  
 108-MIMCD3\_GSM258724.CEL  
 109-mim6\_GSM258725.CEL  
 110-mim6\_GSM258726.CEL  
 111-Astrocytes\_GSM241898.CEL  
 112-Astrocytes\_GSM241898.CEL  
 113-Spleen\_GSM258767.CEL  
 114-Spleen\_GSM258767.CEL  
 115-Spleen\_GSM258768.CEL  
 116-Lymph-nodes\_GSM258691.CEL  
 117-Lymph-nodes\_GSM258691.CEL  
 118-Intestine-small\_GSM258692.CEL  
 119-Intestine-small\_GSM258692.CEL  
 120-Intestine-large\_GSM258678.CEL  
 121-Intestine-large\_GSM258678.CEL  
 122-Colon-d4\_GSM198101.CEL  
 123-Colon-d4\_GSM198101.CEL  
 124-Colon-d9\_GSM198103.CEL  
 125-Colon-d9\_GSM198103.CEL  
 126-Colon-d9\_GSM198104.CEL  
 127-NALT\_GSM289408.CEL  
 128-NALT\_GSM289409.CEL  
 129-NALT\_GSM289410.CEL  
 130-NALT\_GSM289411.CEL



## Cluster0322\_Anitmicrobial peptides (7 nodes)

13,124.5  
12,433.8  
11,743  
11,052.2  
10,361.5  
9,670.7  
8,979.9  
8,289.2  
7,598.4  
6,907.6  
6,216.9  
5,526.1  
4,835.4  
4,144.6  
3,453.8  
2,763.1  
2,072.3  
1,381.5  
690.8  
0

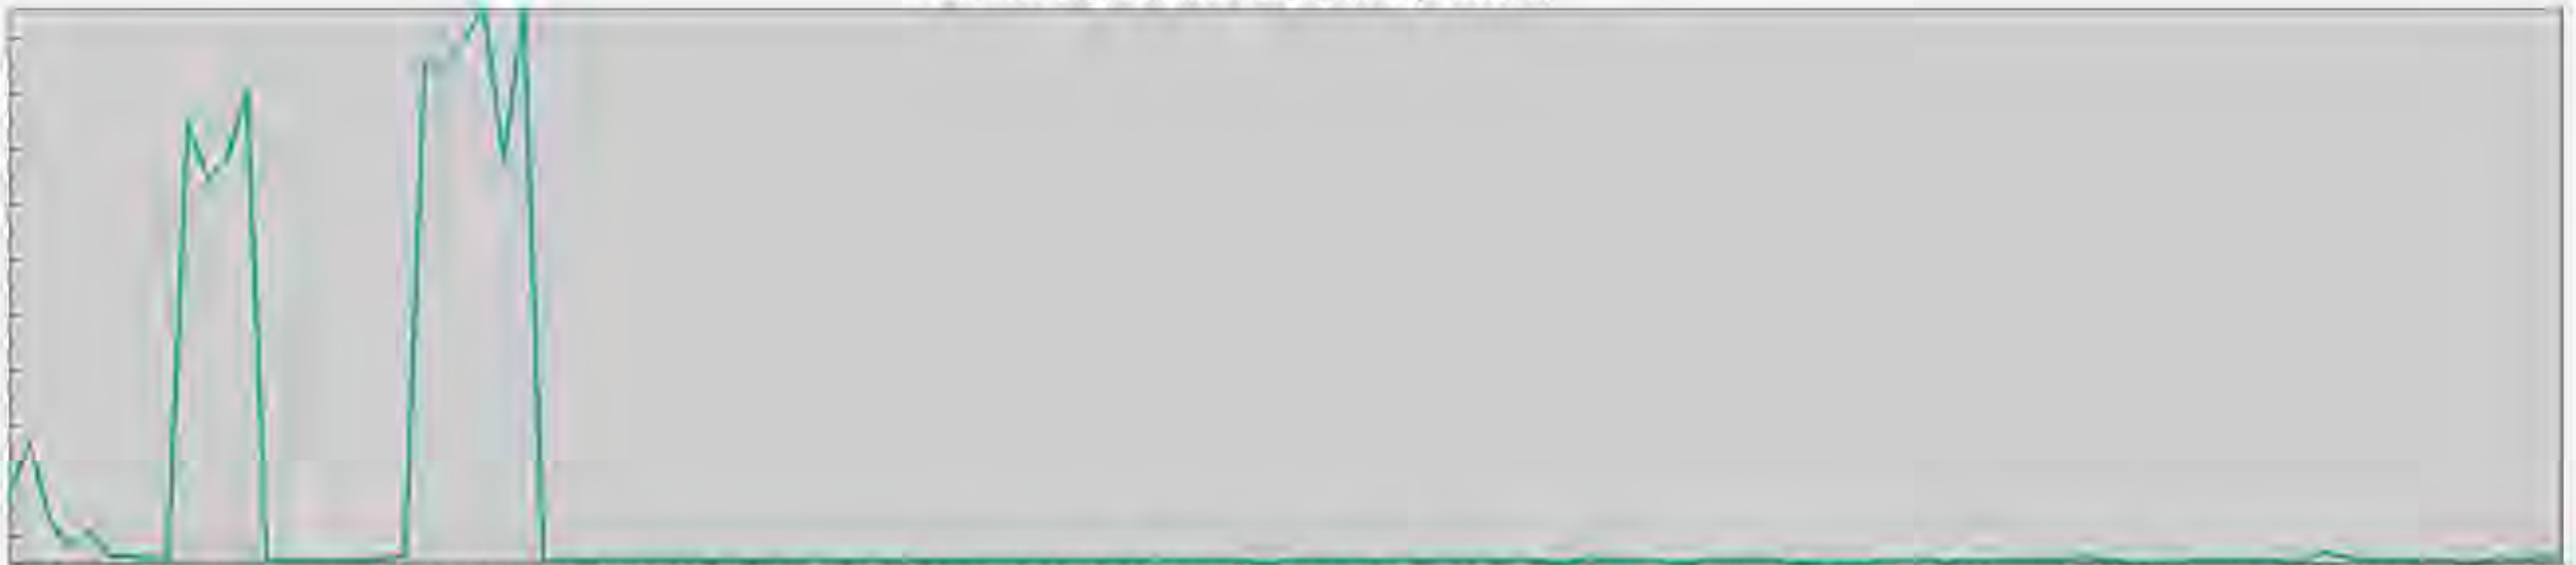

130-NALT GSM289411 CELL  
129-NALT GSM289410 CELL  
128-NALT GSM289409 CELL  
127-NALT GSM289408 CELL  
126-Color-d9 GSM1988105 CELL  
125-Color-d9 GSM1988104 CELL  
124-Color-d9 GSM1988103 CELL  
123-Color-d4 GSM1988102 CELL  
122-Color-d4 GSM1988101 CELL  
121-Intestine-large GSM258676 CELL  
120-Intestine-large GSM258675 CELL  
119-Intestine-small GSM258674 CELL  
118-Intestine-small GSM258673 CELL  
117-Lymph-nodes GSM258672 CELL  
116-Spleen GSM258766 CELL  
115-Spleen GSM258767 CELL  
114-Spleen GSM258768 CELL  
113-Neuro2a GSM258728 CELL  
112-Neuro2a GSM258729 CELL  
111-Astrocytes GSM241898 CELL  
110-mimb GSM258726 CELL  
109-mimb GSM258725 CELL  
108-MIMCD3 GSM258724 CELL  
107-MIMCD3 GSM258723 CELL  
106-Bruce4 GSM258665 CELL  
105-Bruce4 GSM258666 CELL  
104-C2C12 GSM258690 CELL  
103-C2C12 GSM258689 CELL  
102-NH3T3 GSM258730 CELL  
101-NH3T3 GSM258729 CELL  
100-3T3-L1 GSM258610 CELL  
99-3T3-L1 GSM258609 CELL  
98-10T1/2 GSM258632 CELL  
97-10T1/2 GSM258631 CELL  
96-Osteoblast-d21 GSM258740 CELL  
95-Osteoblast-d21 GSM258739 CELL  
94-Osteoblast-d14 GSM258738 CELL  
93-Osteoblast-d14 GSM258737 CELL  
92-Osteoblast-d5 GSM258742 CELL  
91-Osteoblast-d5 GSM258741 CELL  
90-Chondrocytes GSM266741 CELL  
89-Chondrocytes GSM266740 CELL  
88-Nat Helper cell GSM465594 CELL  
87-Nat Helper cell GSM465593 CELL  
86-TT cell GSM465596 CELL  
85-MS-1 GSM234692 CELL  
84-Lymph-endo-cells GSM143704 CELL  
83-P-FDC GSM481977 CELL  
82-P-FDC GSM481978 CELL  
81-P-FDC GSM481976 CELL  
80-D-L Y RMLNDCC003001 CELL  
79-D-L Y RMLNDCC003001 CELL  
78-Follicular-B-cells GSM258664 CELL  
77-Follicular-B-cells GSM258663 CELL  
76-MZ-Bcell GSM258627 CELL  
75-MZ-Bcell GSM258627 CELL  
74-BAF3 GSM258620 CELL  
73-BAF3 GSM258619 CELL  
72-Tregs GSM258778 CELL  
71-Tregs GSM258777 CELL  
70-T-cells-CD8+ GSM258776 CELL  
69-T-cells-CD8+ GSM258774 CELL  
68-T-cells-CD4+ GSM258773 CELL  
67-T-cells-CD4+ GSM258744 CELL  
66-Thymocyte-DN GSM465595 CELL  
65-Osteoclasts GSM258743 CELL  
64-Osteoclasts GSM258743 CELL  
63-Microglia GSM258721 CELL  
62-Microglia GSM258721 CELL  
61-MM-LPS-7h GSM258706 CELL  
60-MM-LPS-7h GSM258706 CELL  
59-MM-LPS-6h GSM258702 CELL  
58-MM-LPS-6h GSM258702 CELL  
57-MM-LPS-6h GSM258699 CELL  
56-MM-LPS-6h GSM258699 CELL  
55-MM-LPS-6h GSM258694 CELL  
54-MM-LPS-6h GSM258694 CELL  
53-Iasmacryoid-DC GSM258650 CELL  
52-Iasmacryoid-DC GSM258649 CELL  
51-CD8a-DC GSM258648 CELL  
50-CD8a-DC GSM258647 CELL  
49-CD8a+DC GSM258646 CELL  
48-CD8a+DC GSM258646 CELL  
47-NK-cells GSM258732 CELL  
46-NK-cells GSM258731 CELL  
45-Mast-cells-IgE+Ad GSM258719 CELL  
44-Mast-cells-IgE+Ad GSM258717 CELL  
43-Mast-cells-IgE GSM258714 CELL  
42-Mast-cells-IgE GSM258713 CELL  
41-Mast-cells GSM258712 CELL  
40-Granulocytes GSM258712 CELL  
39-Granulocytes GSM258667 CELL  
38-Granulocytes GSM258666 CELL  
37-GMP GSM258665 CELL  
36-GMP GSM258665 CELL  
35-GMP GSM258642 CELL  
34-GMP GSM258642 CELL  
33-MEP GSM258720 CELL  
32-MEP GSM258719 CELL  
31-HSC GSM258770 CELL  
30-HSC GSM258769 CELL  
29-Bone marrow GSM258628 CELL  
28-Bone marrow GSM258627 CELL  
27-Paneth-cells-GF GSM116358 CELL  
26-Paneth-cells-GF GSM116357 CELL  
25-Paneth-cells GSM116350 CELL  
24-Paneth-cells GSM116359 CELL  
23-Paneth-cells GSM318589 CELL  
22-Paneth-cells GSM318590 CELL  
21-Color-Crypt GSM480375 CELL  
20-Color-Crypt GSM480374 CELL  
19-Color-Vill GSM480363 CELL  
18-Color-Vill GSM480362 CELL  
17-Color-IEC-GF GSM349880 CELL  
16-Color-IEC-GF GSM350375 CELL  
15-Ileum-IEC-GF GSM350376 CELL  
14-Ileum-IEC GSM350371 CELL  
13-Small-intestine-epithelium RMINEP002901 CELL  
12-Small-intestine-epithelium RMINEP001001 CELL  
11-FAE-RMPYEP002001 CELL  
10-FAE-RMPYEP001001 CELL  
09-Ileum-IEC GSM190797 CELL  
08-Ileum-IEC GSM190796 CELL  
07-Ileum-IEC GSM190795 CELL  
06-CT-v-M-cells GSM190794 CELL  
05-CT-v-M-cells GSM190793 CELL  
04-CT-v-M-cells GSM190792 CELL  
03-PP-M-cells GSM190791 CELL  
02-PP-M-cells GSM190790 CELL  
01-PP-M-cells GSM190789 CELL



Cluster0323\_High in astrocytes and Peyer's patches FDC (7 nodes)

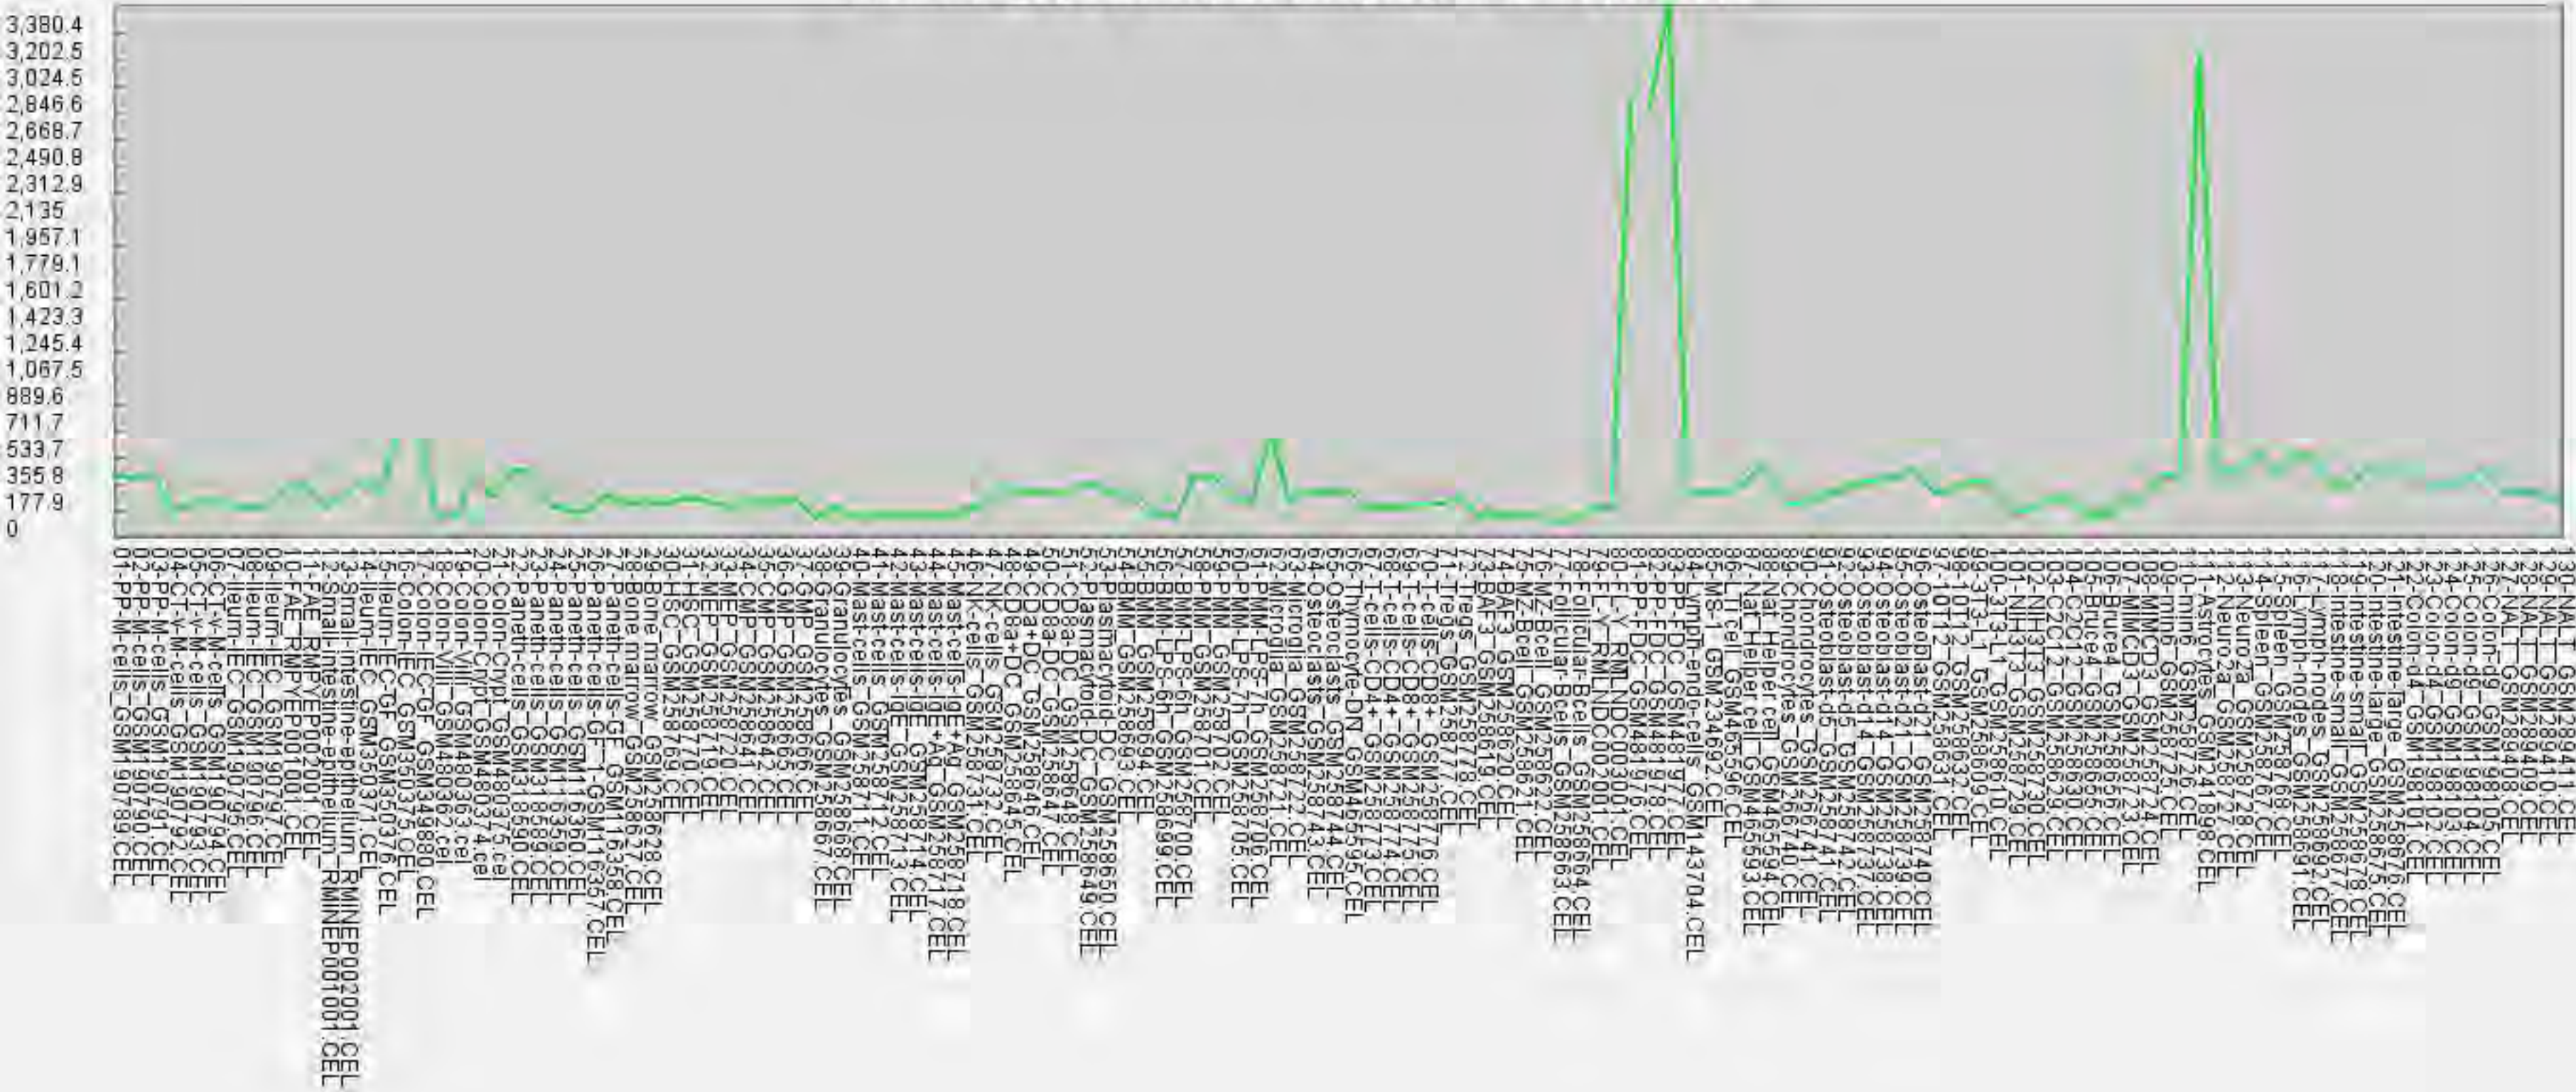







Cluster0325\_Mesenchyme-related/extracellular matrix (7 nodes)

1,646.3  
1,559.6  
1,473  
1,388.3  
1,299.7  
1,213  
1,128.4  
1,039.8  
953.1  
866.5  
779.8  
693.2  
606.5  
519.9  
433.2  
346.6  
259.9  
173.3  
86.6  
0

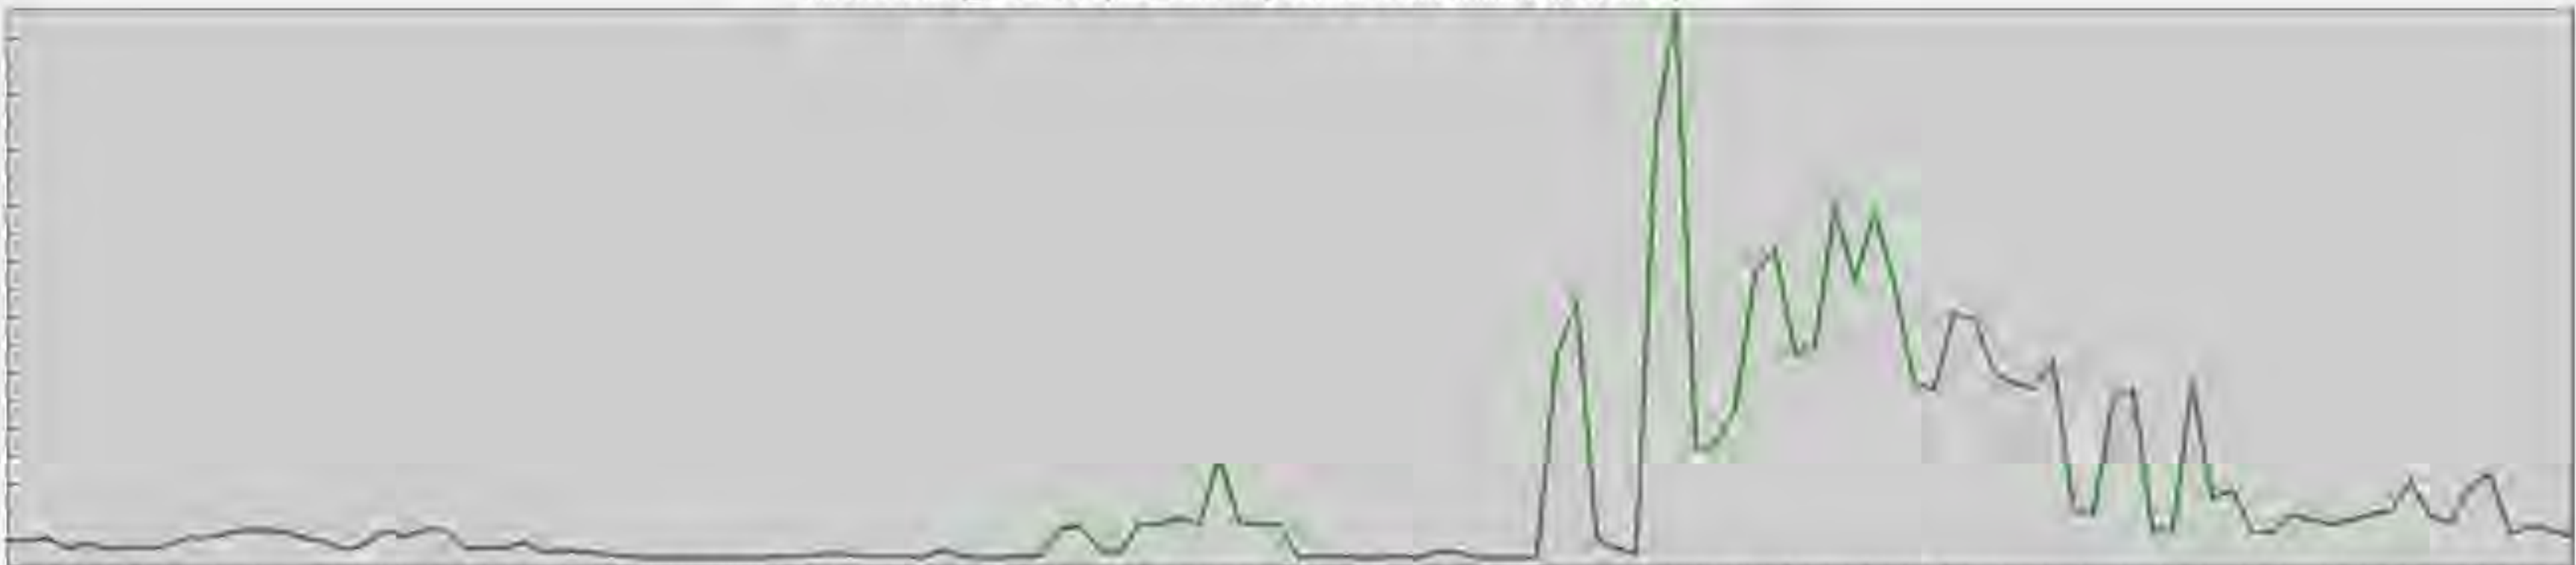

130-NALT GSM289411.CEL  
129-NALT GSM289410.CEL  
128-NALT GSM289409.CEL  
127-NALT GSM289408.CEL  
126-Colon-d9 GSM1988105.CEL  
125-Colon-d9 GSM1988104.CEL  
124-Colon-d9 GSM1988103.CEL  
123-Colon-d4 GSM1988102.CEL  
122-Colon-d4 GSM1988101.CEL  
121-Intestine-large GSM258676.CEL  
120-Intestine-large GSM258675.CEL  
119-Intestine-small GSM258674.CEL  
118-Intestine-small GSM258673.CEL  
117-Lymph-nodes GSM258672.CEL  
116-Lymph-nodes GSM258671.CEL  
115-Spleen GSM258768.CEL  
114-Spleen GSM258767.CEL  
113-Neuro2a GSM258728.CEL  
112-Neuro2a GSM258727.CEL  
111-Astrocytes GSM241898.CEL  
110-mim6 GSM258726.CEL  
109-mim6 GSM258725.CEL  
108-MIMCD3 GSM258724.CEL  
107-MIMCD3 GSM258723.CEL  
106-Bruce4 GSM258665.CEL  
105-Bruce4 GSM258664.CEL  
104-C2C12 GSM258690.CEL  
103-C2C12 GSM258689.CEL  
102-NH3T3 GSM258739.CEL  
101-NH3T3 GSM258738.CEL  
100-3T3-L1 GSM258610.CEL  
99-3T3-L1 GSM258609.CEL  
98-10T12 GSM258632.CEL  
97-10T12 GSM258631.CEL  
96-Osteoblast-d21 GSM258740.CEL  
95-Osteoblast-d21 GSM258739.CEL  
94-Osteoblast-d14 GSM258738.CEL  
93-Osteoblast-d14 GSM258737.CEL  
92-Osteoblast-d5 GSM258742.CEL  
91-Osteoblast-d5 GSM258741.CEL  
90-Chondrocytes GSM266741.CEL  
89-Chondrocytes GSM266740.CEL  
88-Nat Helper cell GSM465594.CEL  
87-Nat Helper cell GSM465593.CEL  
86-LT cell GSM465596.CEL  
85-MS-1 GSM234692.CEL  
84-Lymph-endo-cells GSM143704.CEL  
83-P-FDC GSM481977.CEL  
82-P-FDC GSM481978.CEL  
81-P-FDC GSM481976.CEL  
80-LY RMLNDCC003001.CEL  
79-LY RMLNDCC003001.CEL  
78-Follicular-B-cells GSM258664.CEL  
77-Follicular-B-cells GSM258663.CEL  
76-MZ-Bcell GSM258622.CEL  
75-MZ-Bcell GSM258621.CEL  
74-BAF3 GSM258620.CEL  
73-BAF3 GSM258619.CEL  
72-Tregs GSM258778.CEL  
71-Tregs GSM258777.CEL  
70-T-cells-CD8+ GSM258776.CEL  
69-T-cells-CD8+ GSM258774.CEL  
68-T-cells-CD4+ GSM258773.CEL  
67-T-cells-CD4+ GSM258744.CEL  
66-Thymocyte-DN GSM465595.CEL  
65-Osteoclasts GSM258743.CEL  
64-Osteoclasts GSM258743.CEL  
63-Microglia GSM258721.CEL  
62-Microglia GSM258721.CEL  
61-MM-LPS-7h GSM268706.CEL  
60-MM-LPS-7h GSM268705.CEL  
59-MM-LPS-6h GSM258702.CEL  
58-MM-LPS-6h GSM258701.CEL  
57-MM-LPS-6h GSM258699.CEL  
56-MM-LPS-6h GSM258699.CEL  
55-MM-LPS-6h GSM258699.CEL  
54-MM-LPS-6h GSM258699.CEL  
53-Iasmacryoid-DC GSM258650.CEL  
52-Iasmacryoid-DC GSM258649.CEL  
51-CD8a-DC GSM258647.CEL  
50-CD8a-DC GSM258647.CEL  
49-CD8a+DC GSM258646.CEL  
48-CD8a+DC GSM258646.CEL  
47-NK-cells GSM258732.CEL  
46-NK-cells GSM258731.CEL  
45-Mast-cells-IgE+Ad GSM258718.CEL  
44-Mast-cells-IgE+Ad GSM258717.CEL  
43-Mast-cells-IgE GSM258714.CEL  
42-Mast-cells-IgE GSM258713.CEL  
41-Mast-cells GSM258712.CEL  
40-Granulocytes GSM258668.CEL  
39-Granulocytes GSM258667.CEL  
38-Granulocytes GSM258666.CEL  
37-GMP GSM258665.CEL  
36-GMP GSM258664.CEL  
35-GMP GSM258642.CEL  
34-MEP GSM258641.CEL  
33-MEP GSM258720.CEL  
32-MEP GSM258719.CEL  
31-HSC GSM258770.CEL  
30-HSC GSM258769.CEL  
29-Bone marrow GSM258628.CEL  
28-Bone marrow GSM258627.CEL  
27-paneth-cells-GF GSM116358.CEL  
26-paneth-cells-GF GSM116357.CEL  
25-paneth-cells GSM116350.CEL  
24-paneth-cells GSM116359.CEL  
23-paneth-cells GSM318589.CEL  
22-paneth-cells GSM318590.CEL  
21-Colon-Crypt GSM480375.CEL  
20-Colon-Crypt GSM480374.CEL  
19-Colon-Vill GSM480363.CEL  
18-Colon-Vill GSM480362.CEL  
17-Colon-IEC-GF GSM349880.CEL  
16-Colon-IEC-GF GSM350375.CEL  
15-Ileum-IEC-GF GSM350376.CEL  
14-Ileum-IEC GSM350371.CEL  
13-Small-intestine-epithelium RMINEP002001.CEL  
12-Small-intestine-epithelium RMINEP001001.CEL  
11-FAE RMPYEP002001.CEL  
10-FAE RMPYEP001001.CEL  
09-Ileum-IEC GSM190797.CEL  
08-Ileum-IEC GSM190796.CEL  
07-Ileum-IEC GSM190795.CEL  
06-CT-v-M-cells GSM190794.CEL  
05-CT-v-M-cells GSM190793.CEL  
04-PP-M-cells GSM190792.CEL  
03-PP-M-cells GSM190791.CEL  
02-PP-M-cells GSM190790.CEL  
01-PP-M-cells GSM190789.CEL



Cluster0326\_High in mast cells (7 nodes)

2,648.8  
 2,509.4  
 2,370  
 2,230.6  
 2,091.1  
 1,951.7  
 1,812.3  
 1,672.9  
 1,533.5  
 1,394.1  
 1,254.7  
 1,115.3  
 975.9  
 836.5  
 697  
 557.6  
 418.2  
 278.8  
 139.4  
 0

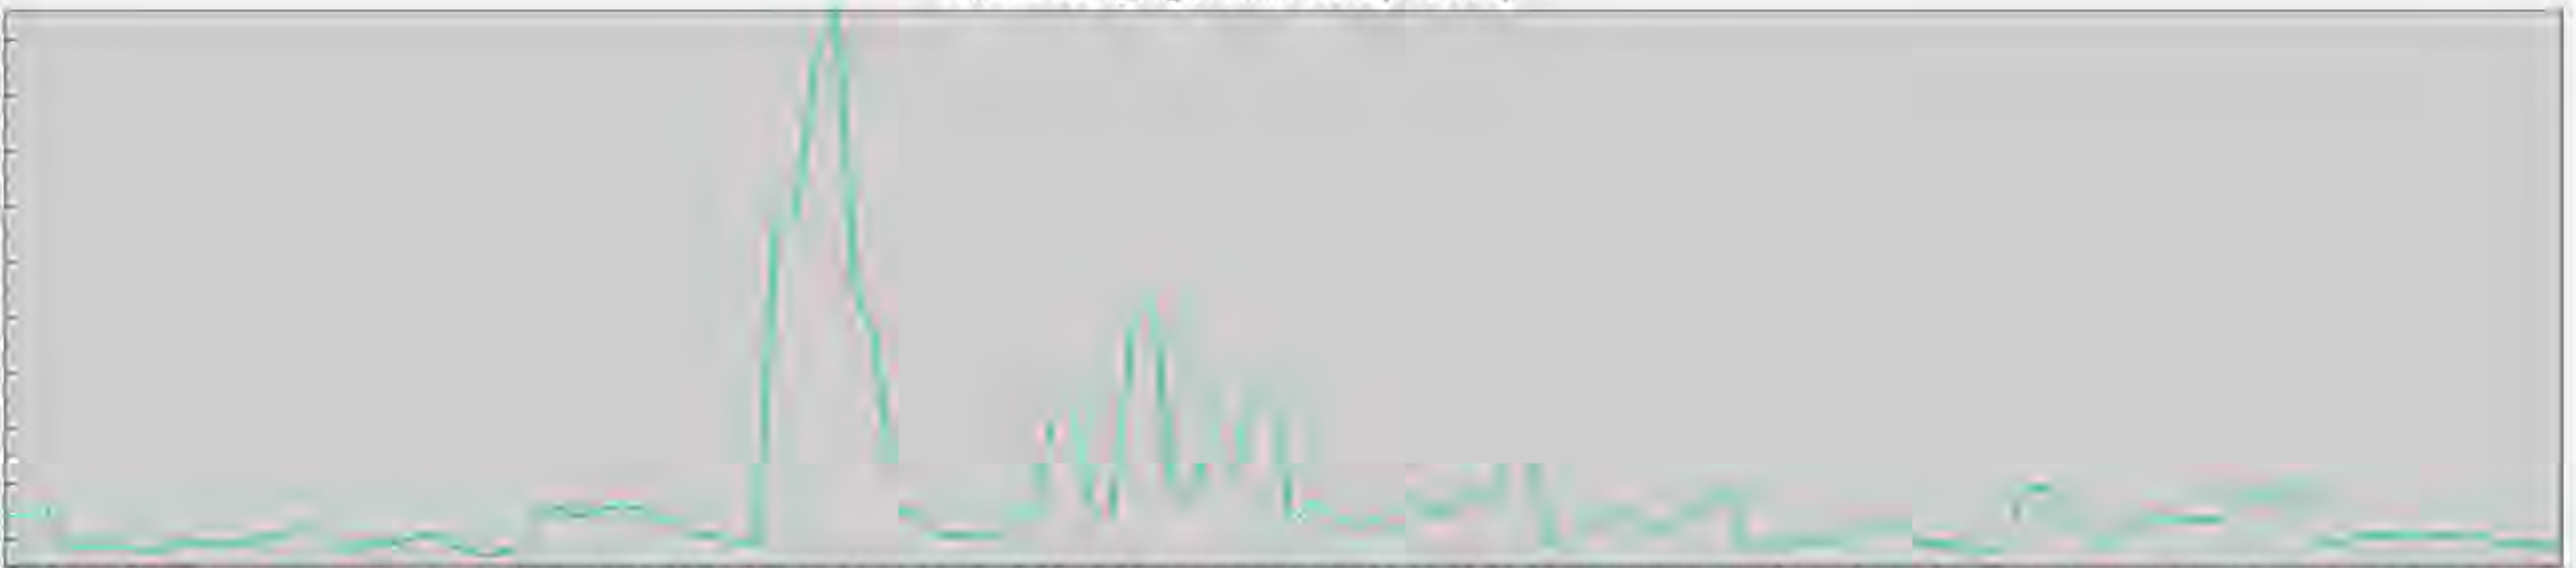

130-NALT GSM289411 CEL  
 129-NALT GSM289410 CEL  
 128-NALT GSM289409 CEL  
 127-NALT GSM289408 CEL  
 126-Colon-d9 GSM1988105 CEL  
 125-Colon-d9 GSM1988104 CEL  
 124-Colon-d9 GSM1988103 CEL  
 123-Colon-d4 GSM1988102 CEL  
 122-Colon-d4 GSM1988101 CEL  
 121-Intestine-large GSM258676 CEL  
 120-Intestine-large GSM258675 CEL  
 119-Intestine-small GSM258674 CEL  
 118-Intestine-small GSM258673 CEL  
 117-Lymph-nodes GSM258672 CEL  
 116-Lymph-nodes GSM258671 CEL  
 115-Spleen GSM258767 CEL  
 114-Spleen GSM258766 CEL  
 113-Neuro2a GSM258728 CEL  
 112-Neuro2a GSM258727 CEL  
 111-Astrocytes GSM241898 CEL  
 110-mimb GSM258726 CEL  
 109-mimb GSM258725 CEL  
 108-MIMCD3 GSM258724 CEL  
 107-MIMCD3 GSM258723 CEL  
 106-Bruce4 GSM258665 CEL  
 105-Bruce4 GSM258664 CEL  
 104-C2C12 GSM258690 CEL  
 103-C2C12 GSM258689 CEL  
 102-NH3T3 GSM258730 CEL  
 101-NH3T3 GSM258729 CEL  
 100-3T3-L1 GSM258610 CEL  
 99-3T3-L1 GSM258609 CEL  
 98-10T12 GSM258632 CEL  
 97-10T12 GSM258631 CEL  
 96-Osteoblast-d21 GSM258740 CEL  
 95-Osteoblast-d21 GSM258739 CEL  
 94-Osteoblast-d14 GSM258738 CEL  
 93-Osteoblast-d14 GSM258737 CEL  
 92-Osteoblast-d5 GSM258742 CEL  
 91-Osteoblast-d5 GSM258741 CEL  
 90-Chondrocytes GSM266741 CEL  
 89-Chondrocytes GSM266740 CEL  
 88-Nat Helper cell GSM465594 CEL  
 87-Nat Helper cell GSM465593 CEL  
 86-TT cell GSM465596 CEL  
 85-MS-1 GSM234692 CEL  
 84-Lymph-endo-cells GSM143704 CEL  
 83-PP-FDC GSM481977 CEL  
 82-PP-FDC GSM481978 CEL  
 81-PP-FDC GSM481976 CEL  
 80-D-F-L-Y RMLNDCC003001 CEL  
 79-D-F-L-Y RMLNDCC003001 CEL  
 78-Follicular-Bcells GSM258664 CEL  
 77-Follicular-Bcells GSM258663 CEL  
 76-MZ-Bcell GSM258627 CEL  
 75-MZ-Bcell GSM258621 CEL  
 74-BAF3 GSM258620 CEL  
 73-BAF3 GSM258619 CEL  
 72-Tregs GSM258778 CEL  
 71-Tregs GSM258777 CEL  
 70-T-cells-CD8+ GSM258776 CEL  
 69-T-cells-CD8+ GSM258774 CEL  
 68-T-cells-CD4+ GSM258773 CEL  
 67-T-cells-CD4+ GSM258773 CEL  
 66-Thymocyte-DN GSM465595 CEL  
 65-Osteoclasts GSM258743 CEL  
 64-Osteoclasts GSM258743 CEL  
 63-Microglia GSM258721 CEL  
 62-Microglia GSM258721 CEL  
 61-PM-M-PS-7h GSM268706 CEL  
 60-PM-M-PS-7h GSM268705 CEL  
 59-PM-M-PS-6h GSM258702 CEL  
 58-PM-M-PS-6h GSM258702 CEL  
 57-BMM-LPS-6h GSM268699 CEL  
 56-BMM-LPS-6h GSM268699 CEL  
 55-BMM-LPS-6h GSM268699 CEL  
 54-BMM-LPS-6h GSM268699 CEL  
 53-Iasmacryoid-DC GSM258650 CEL  
 52-Iasmacryoid-DC GSM258649 CEL  
 51-CD8a-DC GSM258648 CEL  
 50-CD8a-DC GSM258647 CEL  
 49-CD8a+DC GSM258646 CEL  
 48-CD8a+DC GSM258646 CEL  
 47-NK-cells GSM258732 CEL  
 46-NK-cells GSM258731 CEL  
 45-Mast-cells-IgE+Ad GSM258718 CEL  
 44-Mast-cells-IgE+Ad GSM258717 CEL  
 43-Mast-cells-IgE GSM258714 CEL  
 42-Mast-cells-IgE GSM258713 CEL  
 41-Mast-cells GSM258712 CEL  
 40-Granulocytes GSM258668 CEL  
 39-Granulocytes GSM258667 CEL  
 38-GMP GSM258666 CEL  
 37-GMP GSM258665 CEL  
 36-GMP GSM258664 CEL  
 35-CMP GSM258642 CEL  
 34-CMP GSM258641 CEL  
 33-MEP GSM258720 CEL  
 32-MEP GSM258719 CEL  
 31-HESC GSM258770 CEL  
 30-HESC GSM258769 CEL  
 29-Bone marrow GSM258628 CEL  
 28-Bone marrow GSM258627 CEL  
 27-paneth-cells-GF GSM116358 CEL  
 26-paneth-cells-GF GSM116357 CEL  
 25-paneth-cells GSM116350 CEL  
 24-paneth-cells GSM116359 CEL  
 23-paneth-cells GSM318589 CEL  
 22-paneth-cells GSM318590 CEL  
 21-paneth-cells GSM318590 CEL  
 20-Colon-Crypt GSM480375 cel  
 19-Colon-Vill GSM480363 cel  
 18-Colon-Vill GSM480362 cel  
 17-Colon-IEC-GF GSM349880 CEL  
 16-Colon-IEC-GF GSM350375 CEL  
 15-Ileum-IEC GSM350376 CEL  
 14-Ileum-IEC GSM350371 CEL  
 13-Small-intestine-epithelium RMINEP002001 CEL  
 12-Small-intestine-epithelium RMINEP001001 CEL  
 11-FAE-RMPYEP002001 CEL  
 10-FAE-RMPYEP001001 CEL  
 9-Ileum-IEC GSM190797 CEL  
 8-Ileum-IEC GSM190796 CEL  
 7-Ileum-IEC GSM190795 CEL  
 6-CT-v-M-cells GSM190794 CEL  
 5-CT-v-M-cells GSM190793 CEL  
 4-CT-v-M-cells GSM190792 CEL  
 03-PP-M-cells GSM190791 CEL  
 02-PP-M-cells GSM190790 CEL  
 01-PP-M-cells GSM190789 CEL















Cluster0330\_Uncertain (7 nodes)

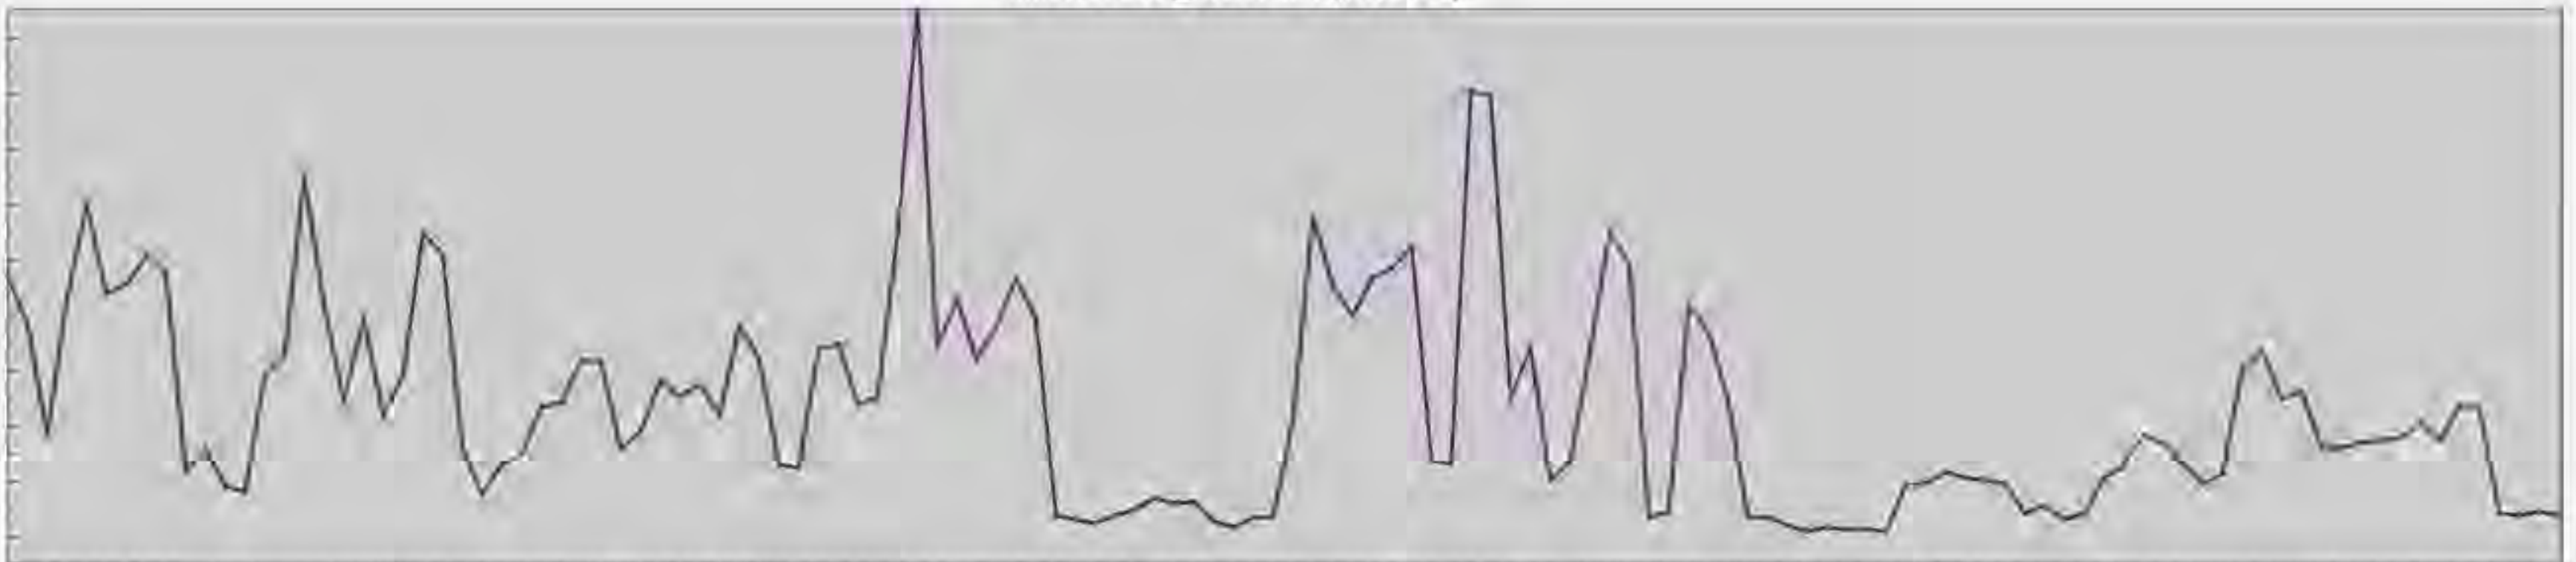

130-NALT GSM289411.CEL  
 129-NALT GSM289410.CEL  
 128-NALT GSM289409.CEL  
 127-NALT GSM289408.CEL  
 126-Colon-d9 GSM1988105.CEL  
 125-Colon-d9 GSM1988104.CEL  
 124-Colon-d9 GSM1988103.CEL  
 123-Colon-d4 GSM1988102.CEL  
 122-Colon-d4 GSM1988101.CEL  
 121-Intestine-large GSM258676.CEL  
 120-Intestine-large GSM258675.CEL  
 119-Intestine-small GSM258678.CEL  
 118-Intestine-small GSM258692.CEL  
 117-Lymph-nodes GSM258691.CEL  
 116-Lymph-nodes GSM258725.CEL  
 115-Spleen GSM258768.CEL  
 114-Spleen GSM258767.CEL  
 113-Neuro2a GSM258728.CEL  
 112-Neuro2a GSM258727.CEL  
 111-Astrocytes GSM241898.CEL  
 110-mim6 GSM258726.CEL  
 109-mim6 GSM258725.CEL  
 108-MIMCD3 GSM258724.CEL  
 107-MIMCD3 GSM258723.CEL  
 106-Bruce4 GSM258656.CEL  
 105-Bruce4 GSM258655.CEL  
 104-C2C12 GSM258690.CEL  
 103-C2C12 GSM258689.CEL  
 102-NH3T3 GSM258739.CEL  
 101-NH3T3 GSM258738.CEL  
 100-3T3-L1 GSM258610.CEL  
 99-3T3-L1 GSM258609.CEL  
 98-10T12 GSM258632.CEL  
 97-10T12 GSM258631.CEL  
 96-Osteoblast-d21 GSM258740.CEL  
 95-Osteoblast-d21 GSM258739.CEL  
 94-Osteoblast-d14 GSM258738.CEL  
 93-Osteoblast-d14 GSM258737.CEL  
 92-Osteoblast-d5 GSM258742.CEL  
 91-Osteoblast-d5 GSM258741.CEL  
 90-Chondrocytes GSM266741.CEL  
 89-Chondrocytes GSM266740.CEL  
 88-Nat Helper cell GSM465594.CEL  
 87-Nat Helper cell GSM465593.CEL  
 86-TT cell GSM465596.CEL  
 85-MS-1 GSM234692.CEL  
 84-Lymph-endc-cells GSM143704.CEL  
 83-PP-FDC GSM481977.CEL  
 82-PP-FDC GSM481978.CEL  
 81-PP-FDC GSM481976.CEL  
 80-F-LY RMLNDCC003001.CEL  
 79-F-LY RMLNDCC003001.CEL  
 78-Follicular-Bcells GSM258664.CEL  
 77-Follicular-Bcells GSM258663.CEL  
 76-MZ-Bcell GSM258622.CEL  
 75-MZ-Bcell GSM258621.CEL  
 74-BAF3 GSM258620.CEL  
 73-BAF3 GSM258619.CEL  
 72-Tregs GSM258778.CEL  
 71-Tregs GSM258777.CEL  
 70-T-cells-CD8+ GSM258776.CEL  
 69-T-cells-CD8+ GSM258775.CEL  
 68-T-cells-CD4+ GSM258774.CEL  
 67-T-cells-CD4+ GSM258773.CEL  
 66-Thymocyte-DN GSM465595.CEL  
 65-Osteoclasts GSM258744.CEL  
 64-Osteoclasts GSM258743.CEL  
 63-Microglia GSM258721.CEL  
 62-Microglia GSM258721.CEL  
 61-PM-M-PS-7h GSM258706.CEL  
 60-PM-M-PS-7h GSM258706.CEL  
 59-PM-M-PS-7h GSM258705.CEL  
 58-PM-M-PS-7h GSM258702.CEL  
 57-PM-M-PS-6h GSM258700.CEL  
 56-PM-M-PS-6h GSM258699.CEL  
 55-BMM-LPS-6h GSM258699.CEL  
 54-BMM-LPS-6h GSM258699.CEL  
 53-BMM-LPS-6h GSM258699.CEL  
 52-Plasmacytoid-DC GSM258650.CEL  
 51-CD8a-DC GSM258649.CEL  
 50-CD8a-DC GSM258647.CEL  
 49-CD8a+DC GSM258646.CEL  
 48-CD8a+DC GSM258645.CEL  
 47-NK-cells GSM258732.CEL  
 46-NK-cells GSM258732.CEL  
 45-Mast-cells-IgE+Ad GSM258718.CEL  
 44-Mast-cells-IgE+Ad GSM258717.CEL  
 43-Mast-cells-IgE GSM258714.CEL  
 42-Mast-cells-IgE GSM258713.CEL  
 41-Mast-cells GSM258712.CEL  
 40-Granulocytes GSM258668.CEL  
 39-Granulocytes GSM258667.CEL  
 38-GMP GSM258666.CEL  
 37-GMP GSM258666.CEL  
 36-GMP GSM258665.CEL  
 35-CMP GSM258642.CEL  
 34-CMP GSM258641.CEL  
 33-MEP GSM258720.CEL  
 32-MEP GSM258719.CEL  
 31-HSC GSM258770.CEL  
 30-HSC GSM258770.CEL  
 29-Bone marrow GSM258628.CEL  
 28-Bone marrow GSM258627.CEL  
 27-Paneth-cells-GF-1 GSM116357.CEL  
 26-Paneth-cells-GF-1 GSM116350.CEL  
 25-Paneth-cells GSM116359.CEL  
 24-Paneth-cells GSM116359.CEL  
 23-Paneth-cells GSM318589.CEL  
 22-Paneth-cells GSM318590.CEL  
 21-Colon-Crypt GSM480375.CEL  
 20-Colon-Crypt GSM480374.CEL  
 19-Colon-Vill GSM480363.CEL  
 18-Colon-Vill GSM480362.CEL  
 17-Colon-IEC-GF GSM349880.CEL  
 16-Colon-IEC-GF GSM350375.CEL  
 15-Ileum-IEC-TGF GSM350376.CEL  
 14-Ileum-IEC GSM350371.CEL  
 13-Small-intestine-epithelium RMINEP002901.CEL  
 12-Small-intestine-epithelium RMINEP001001.CEL  
 11-FAE-RMPYEP002001.CEL  
 10-FAE-RMPYEP001001.CEL  
 09-Ileum-IEC GSM190797.CEL  
 08-Ileum-IEC GSM190796.CEL  
 07-Ileum-IEC GSM190795.CEL  
 06-CT-v-M-cells GSM190794.CEL  
 05-CT-v-M-cells GSM190793.CEL  
 04-PP-M-cells GSM190792.CEL  
 03-PP-M-cells GSM190791.CEL  
 02-PP-M-cells GSM190790.CEL  
 01-PP-M-cells GSM190789.CEL



Cluster0331\_Uncertain-low in many (7 nodes)

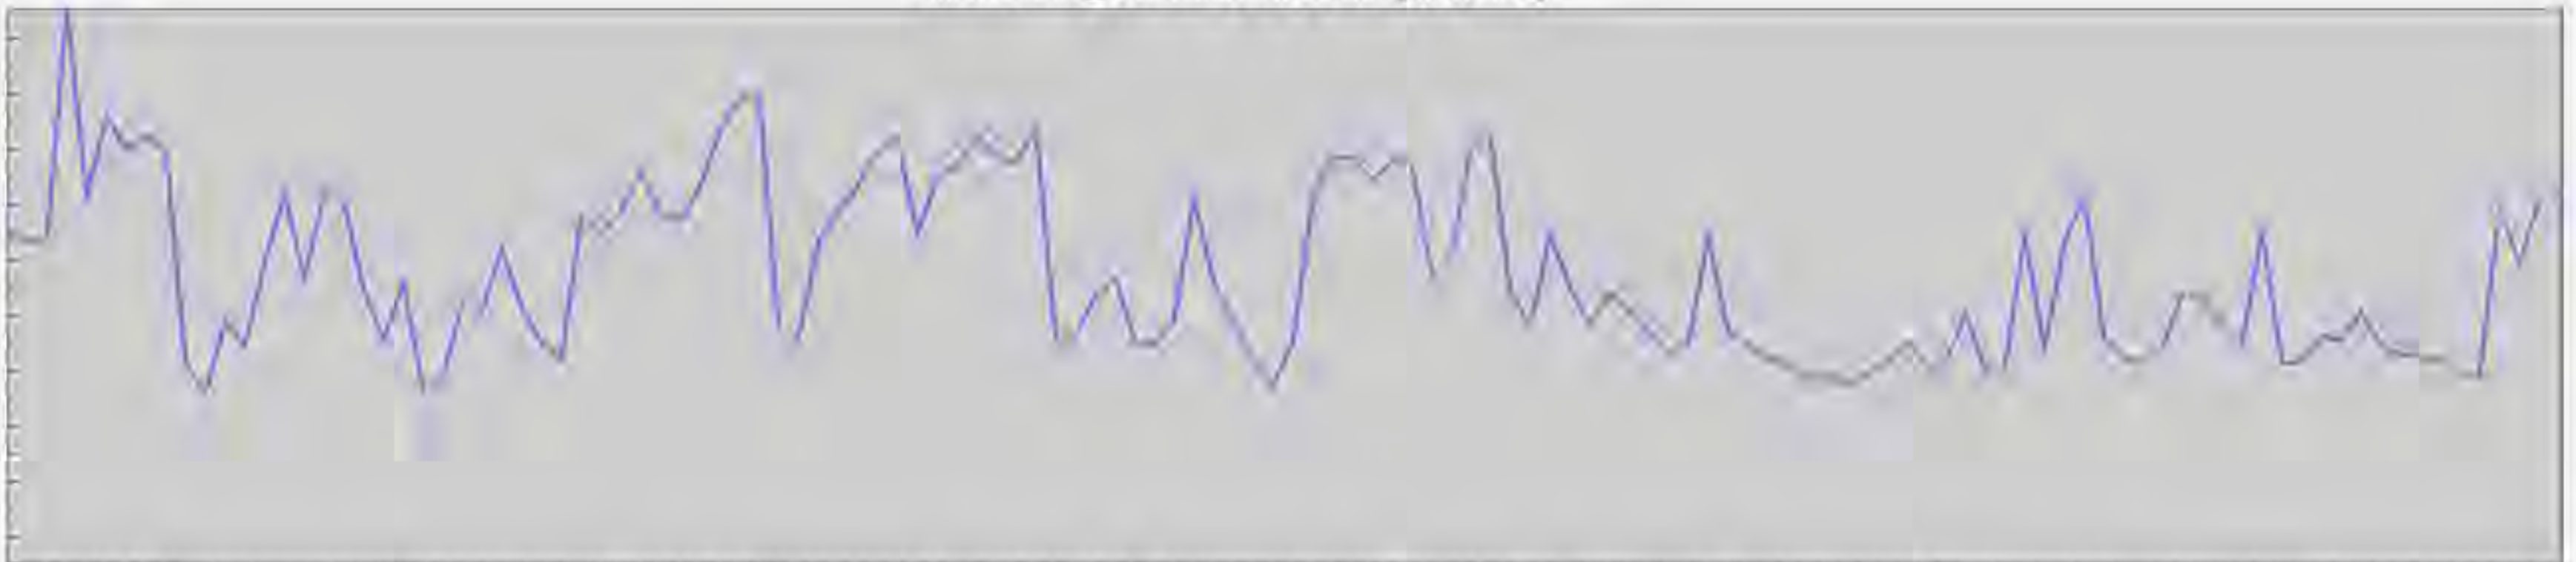

130-NALT GSM289411.CEL  
 129-NALT GSM289410.CEL  
 128-NALT GSM289409.CEL  
 127-NALT GSM289408.CEL  
 126-Colon-d9 GSM1988105.CEL  
 125-Colon-d9 GSM1988104.CEL  
 124-Colon-d9 GSM1988103.CEL  
 123-Colon-d4 GSM1988102.CEL  
 122-Colon-d4 GSM1988101.CEL  
 121-Intestine-large GSM258676.CEL  
 120-Intestine-large GSM258675.CEL  
 119-Intestine-small GSM258678.CEL  
 118-Intestine-small GSM258677.CEL  
 117-Lymph-nodes GSM258691.CEL  
 116-Lymph-nodes GSM258692.CEL  
 115-Spleen GSM258767.CEL  
 114-Spleen GSM258767.CEL  
 113-Neuro2a GSM258727.CEL  
 112-Neuro2a GSM258727.CEL  
 111-Astrocytes GSM241898.CEL  
 110-mim6 GSM258726.CEL  
 109-mim6 GSM258725.CEL  
 108-MIMCD3 GSM258724.CEL  
 107-MIMCD3 GSM258723.CEL  
 106-Bruce4 GSM258656.CEL  
 105-Bruce4 GSM258656.CEL  
 104-C2C12 GSM258690.CEL  
 103-C2C12 GSM258629.CEL  
 102-NH3T3 GSM258739.CEL  
 101-NH3T3 GSM258739.CEL  
 100-3T3-L1 GSM258610.CEL  
 99-3T3-L1 GSM258609.CEL  
 98-10T12 GSM258631.CEL  
 97-10T12 GSM258631.CEL  
 96-Osteoblast-d21 GSM258740.CEL  
 95-Osteoblast-d21 GSM258739.CEL  
 94-Osteoblast-d14 GSM258738.CEL  
 93-Osteoblast-d14 GSM258737.CEL  
 92-Osteoblast-d5 GSM258742.CEL  
 91-Osteoblast-d5 GSM258741.CEL  
 90-Chondrocytes GSM266741.CEL  
 89-Chondrocytes GSM266740.CEL  
 88-Nat Helper cell GSM465594.CEL  
 87-Nat Helper cell GSM465593.CEL  
 86-LT cell GSM465596.CEL  
 85-MS-1 GSM234692.CEL  
 84-Lymph-endc-cells GSM143704.CEL  
 83-PP-FDC GSM481977.CEL  
 82-PP-FDC GSM481978.CEL  
 81-PP-FDC GSM481976.CEL  
 80-F-LY RMLNDCC003001.CEL  
 79-F-LY RMLNDCC003001.CEL  
 78-Follicular-Bcells GSM258664.CEL  
 77-Follicular-Bcells GSM258663.CEL  
 76-MZ-Bcell GSM258622.CEL  
 75-MZ-Bcell GSM258621.CEL  
 74-BAF3 GSM258620.CEL  
 73-BAF3 GSM258619.CEL  
 72-Tregs GSM258778.CEL  
 71-Tregs GSM258777.CEL  
 70-T-cells-CD8+ GSM258776.CEL  
 69-T-cells-CD8+ GSM258775.CEL  
 68-T-cells-CD4+ GSM258774.CEL  
 67-T-cells-CD4+ GSM258773.CEL  
 66-Thymocyte-DN GSM465595.CEL  
 65-Osteoclasts GSM258744.CEL  
 64-Osteoclasts GSM258743.CEL  
 63-Microglia GSM258721.CEL  
 62-Microglia GSM258721.CEL  
 61-PM-M-PS-7h GSM258706.CEL  
 60-PM-M-PS-7h GSM258706.CEL  
 59-PM-M-PS-7h GSM258705.CEL  
 58-PM-M-PS-6h GSM258702.CEL  
 57-PM-M-PS-6h GSM258702.CEL  
 56-PM-M-PS-6h GSM258699.CEL  
 55-PM-M-PS-6h GSM258699.CEL  
 54-PM-M-PS-6h GSM258699.CEL  
 53-PM-M-PS-6h GSM258699.CEL  
 52-PM-M-PS-6h GSM258699.CEL  
 51-PM-M-PS-6h GSM258699.CEL  
 50-CD8a-DC GSM258647.CEL  
 49-CD8a-DC GSM258647.CEL  
 48-CD8a+DC GSM258646.CEL  
 47-NK-cells GSM258732.CEL  
 46-NK-cells GSM258731.CEL  
 45-Mast-cells-IgE+Ad GSM258718.CEL  
 44-Mast-cells-IgE+Ad GSM258717.CEL  
 43-Mast-cells-IgE GSM258714.CEL  
 42-Mast-cells-IgE GSM258713.CEL  
 41-Mast-cells GSM258712.CEL  
 40-Granulocytes GSM258711.CEL  
 39-Granulocytes GSM258667.CEL  
 38-Granulocytes GSM258667.CEL  
 37-GMP GSM258666.CEL  
 36-GMP GSM258666.CEL  
 35-GMP GSM258665.CEL  
 34-GMP GSM258664.CEL  
 33-MEP GSM258720.CEL  
 32-MEP GSM258720.CEL  
 31-MEP GSM258720.CEL  
 30-HSC GSM258770.CEL  
 29-Bone marrow GSM258628.CEL  
 28-Bone marrow GSM258627.CEL  
 27-Paneth-cells-GF-1 GSM116357.CEL  
 26-Paneth-cells-GF-1 GSM116357.CEL  
 25-Paneth-cells GSM116350.CEL  
 24-Paneth-cells GSM116359.CEL  
 23-Paneth-cells GSM318589.CEL  
 22-Paneth-cells GSM318590.CEL  
 21-Colon-Crypt GSM480375.CEL  
 20-Colon-Crypt GSM480374.CEL  
 19-Colon-Vill GSM480363.CEL  
 18-Colon-Vill GSM480362.CEL  
 17-Colon-IEC-GF GSM349880.CEL  
 16-Colon-IEC-GF GSM350375.CEL  
 15-Ileum-IEC-GF GSM350376.CEL  
 14-Ileum-IEC GSM350371.CEL  
 13-Small-intestine-epithelium RMINEP002901.CEL  
 12-Small-intestine-epithelium RMINEP001001.CEL  
 11-FAE RMPYEP002001.CEL  
 10-FAE RMPYEP001001.CEL  
 09-Ileum-IEC GSM190797.CEL  
 08-Ileum-IEC GSM190796.CEL  
 07-Ileum-IEC GSM190795.CEL  
 06-CT-v-M-cells GSM190794.CEL  
 05-CT-v-M-cells GSM190793.CEL  
 04-PP-M-cells GSM190792.CEL  
 03-PP-M-cells GSM190791.CEL  
 02-PP-M-cells GSM190790.CEL  
 01-PP-M-cells GSM190789.CEL



Cluster0332\_Mesenchyme-related/extracellular matrix (7 nodes)

2,540.1  
2,408.4  
2,272.7  
2,139.1  
2,005.4  
1,871.7  
1,738  
1,604.3  
1,470.6  
1,336.9  
1,203.2  
1,069.5  
935.8  
802.1  
668.5  
534.8  
401.1  
267.4  
133.7  
0

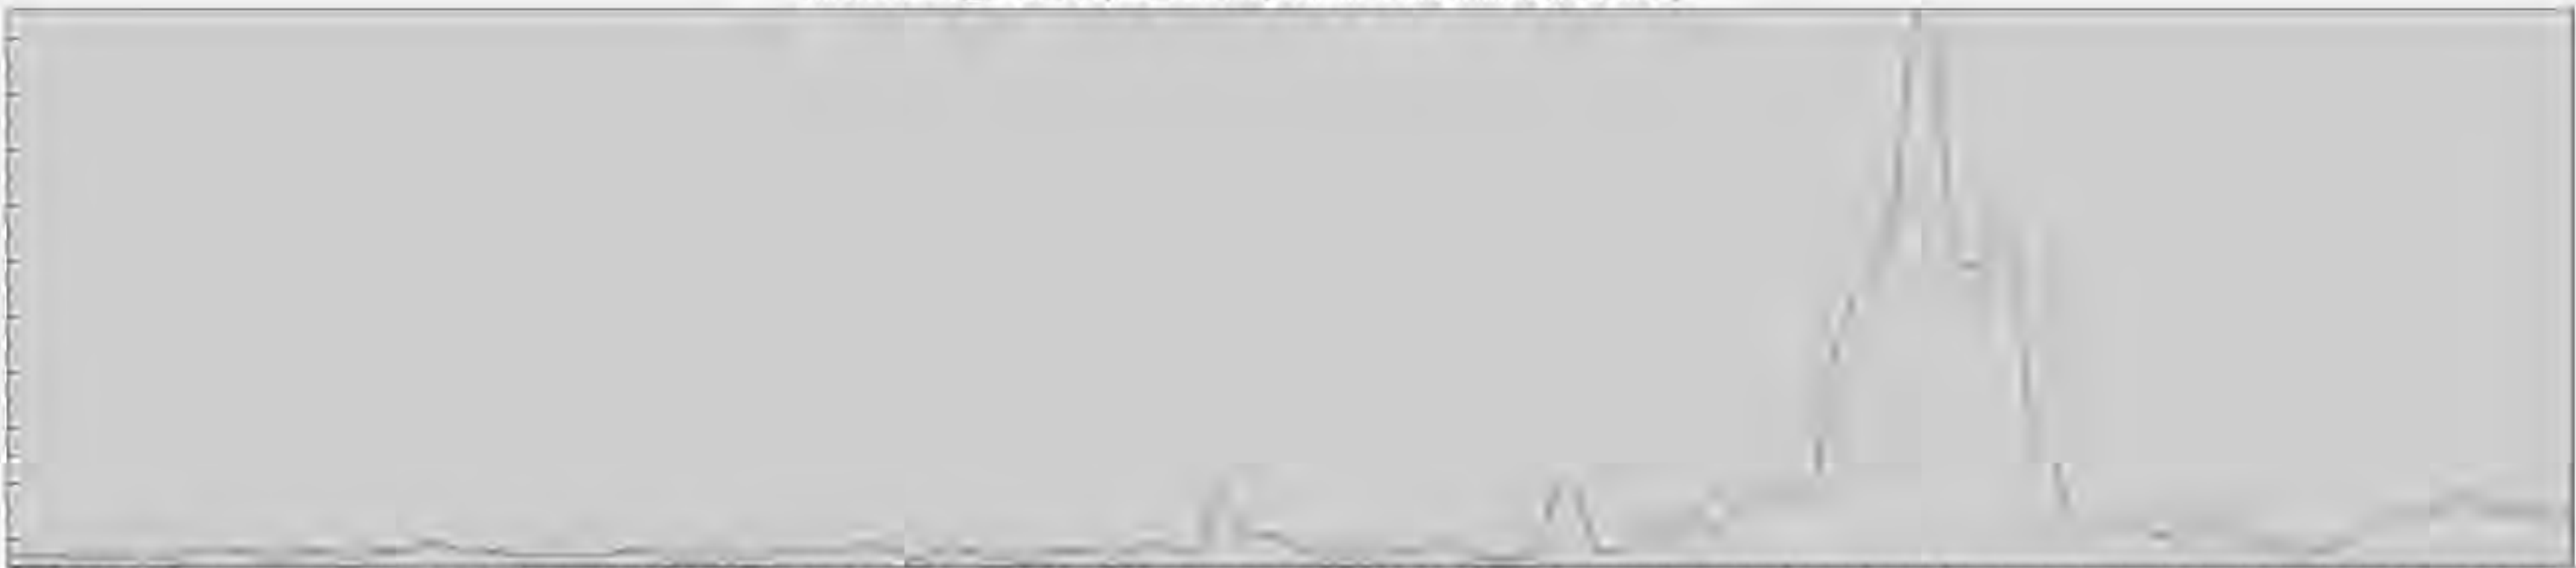

|     |                            |              |     |
|-----|----------------------------|--------------|-----|
| 130 | NALT                       | GSM289411    | CEL |
| 129 | NALT                       | GSM289410    | CEL |
| 128 | NALT                       | GSM289409    | CEL |
| 127 | NALT                       | GSM289408    | CEL |
| 126 | Colon-d9                   | GSM1988104   | CEL |
| 125 | Colon-d9                   | GSM1988103   | CEL |
| 124 | Colon-d9                   | GSM1988102   | CEL |
| 123 | Colon-d4                   | GSM1988101   | CEL |
| 122 | Colon-d4                   | GSM1988100   | CEL |
| 121 | Intestine-large            | GSM258676    | CEL |
| 120 | Intestine-large            | GSM258675    | CEL |
| 119 | Intestine-small            | GSM258674    | CEL |
| 118 | Intestine-small            | GSM258673    | CEL |
| 117 | Lymph-nodes                | GSM258672    | CEL |
| 116 | Lymph-nodes                | GSM258671    | CEL |
| 115 | Spleen                     | GSM258670    | CEL |
| 114 | Spleen                     | GSM258669    | CEL |
| 113 | Neuro2a                    | GSM241898    | CEL |
| 112 | Neuro2a                    | GSM241897    | CEL |
| 111 | Astrocytes                 | GSM241896    | CEL |
| 110 | mim6                       | GSM258726    | CEL |
| 109 | mim6                       | GSM258725    | CEL |
| 108 | MIMCD3                     | GSM258724    | CEL |
| 107 | MIMCD3                     | GSM258723    | CEL |
| 106 | Bruce4                     | GSM258666    | CEL |
| 105 | Bruce4                     | GSM258665    | CEL |
| 104 | C2C12                      | GSM258664    | CEL |
| 103 | C2C12                      | GSM258663    | CEL |
| 102 | NH3T3                      | GSM258730    | CEL |
| 101 | NH3T3                      | GSM258729    | CEL |
| 100 | 3T3-L1                     | GSM258610    | CEL |
| 99  | 3T3-L1                     | GSM258609    | CEL |
| 98  | 10T12                      | GSM258632    | CEL |
| 97  | 10T12                      | GSM258631    | CEL |
| 96  | Osteoblast-d21             | GSM258740    | CEL |
| 95  | Osteoblast-d21             | GSM258739    | CEL |
| 94  | Osteoblast-d14             | GSM258738    | CEL |
| 93  | Osteoblast-d14             | GSM258737    | CEL |
| 92  | Osteoblast-d5              | GSM258742    | CEL |
| 91  | Osteoblast-d5              | GSM258741    | CEL |
| 90  | Chondrocytes               | GSM266741    | CEL |
| 89  | Chondrocytes               | GSM266740    | CEL |
| 88  | Nat Helper cell            | GSM465594    | CEL |
| 87  | Nat Helper cell            | GSM465593    | CEL |
| 86  | Tt cell                    | GSM465596    | CEL |
| 85  | MS-1                       | GSM234692    | CEL |
| 84  | Lymph-endo-cells           | GSM143704    | CEL |
| 83  | PP-FDC                     | GSM481977    | CEL |
| 82  | PP-FDC                     | GSM481978    | CEL |
| 81  | PP-FDC                     | GSM481976    | CEL |
| 80  | F-LY                       | RMLNDC003001 | CEL |
| 79  | F-LY                       | RMLNDC003001 | CEL |
| 78  | Follicular-Bcells          | GSM258664    | CEL |
| 77  | Follicular-Bcells          | GSM258663    | CEL |
| 76  | MZ-Bcell                   | GSM258622    | CEL |
| 75  | MZ-Bcell                   | GSM258621    | CEL |
| 74  | BAF3                       | GSM258620    | CEL |
| 73  | BAF3                       | GSM258619    | CEL |
| 72  | Tregs                      | GSM258778    | CEL |
| 71  | T-cells-CD8+               | GSM258777    | CEL |
| 70  | T-cells-CD8+               | GSM258776    | CEL |
| 69  | T-cells-CD4+               | GSM258774    | CEL |
| 68  | T-cells-CD4+               | GSM258773    | CEL |
| 67  | T-cells-CD4+               | GSM258744    | CEL |
| 66  | Thymocyte-DN               | GSM465595    | CEL |
| 65  | Osteoclasts                | GSM258743    | CEL |
| 64  | Microglia                  | GSM258721    | CEL |
| 63  | Microglia                  | GSM258720    | CEL |
| 62  | MM-LPS-7h                  | GSM268706    | CEL |
| 61  | MM-LPS-7h                  | GSM268705    | CEL |
| 60  | MM-LPS-6h                  | GSM268702    | CEL |
| 59  | MM-LPS-6h                  | GSM268701    | CEL |
| 58  | MM-LPS-6h                  | GSM268699    | CEL |
| 57  | MM-LPS-6h                  | GSM268698    | CEL |
| 56  | MM-LPS-6h                  | GSM268697    | CEL |
| 55  | MM-LPS-6h                  | GSM268696    | CEL |
| 54  | MM-LPS-6h                  | GSM268695    | CEL |
| 53  | MM-LPS-6h                  | GSM268694    | CEL |
| 52  | MM-LPS-6h                  | GSM268693    | CEL |
| 51  | MM-LPS-6h                  | GSM268692    | CEL |
| 50  | CD8a-DC                    | GSM258647    | CEL |
| 49  | CD8a-DC                    | GSM258646    | CEL |
| 48  | CD8a+DC                    | GSM258645    | CEL |
| 47  | NK-cells                   | GSM258732    | CEL |
| 46  | NK-cells                   | GSM258731    | CEL |
| 45  | Mast-cells-IgE+Ad          | GSM258719    | CEL |
| 44  | Mast-cells-IgE+Ad          | GSM258718    | CEL |
| 43  | Mast-cells-IgE             | GSM258714    | CEL |
| 42  | Mast-cells-IgE             | GSM258713    | CEL |
| 41  | Mast-cells                 | GSM258712    | CEL |
| 40  | Granulocytes               | GSM258667    | CEL |
| 39  | Granulocytes               | GSM258666    | CEL |
| 38  | GMP                        | GSM258665    | CEL |
| 37  | GMP                        | GSM258664    | CEL |
| 36  | GMP                        | GSM258663    | CEL |
| 35  | GMP                        | GSM258662    | CEL |
| 34  | GMP                        | GSM258661    | CEL |
| 33  | GMP                        | GSM258660    | CEL |
| 32  | GMP                        | GSM258659    | CEL |
| 31  | Colon-Crypt                | GSM480374    | CEL |
| 30  | Colon-Crypt                | GSM480375    | CEL |
| 29  | Colon-Vill                 | GSM480363    | CEL |
| 28  | Colon-Vill                 | GSM480362    | CEL |
| 27  | Colon-Vill                 | GSM349880    | CEL |
| 26  | Colon-Vill                 | GSM349879    | CEL |
| 25  | Colon-Vill                 | GSM349878    | CEL |
| 24  | Colon-Vill                 | GSM349877    | CEL |
| 23  | Colon-Vill                 | GSM349876    | CEL |
| 22  | Colon-Vill                 | GSM349875    | CEL |
| 21  | Colon-Vill                 | GSM349874    | CEL |
| 20  | Colon-Vill                 | GSM349873    | CEL |
| 19  | Colon-Vill                 | GSM349872    | CEL |
| 18  | Colon-Vill                 | GSM349871    | CEL |
| 17  | Colon-Vill                 | GSM349870    | CEL |
| 16  | Colon-Vill                 | GSM349869    | CEL |
| 15  | Colon-Vill                 | GSM349868    | CEL |
| 14  | Colon-Vill                 | GSM349867    | CEL |
| 13  | Small-intestine-epithelium | RMINEP002001 | CEL |
| 12  | Small-intestine-epithelium | RMINEP001001 | CEL |
| 11  | FAE                        | RMPYEP002001 | CEL |
| 10  | FAE                        | RMPYEP001001 | CEL |
| 09  | Ileum-IEC                  | GSM190797    | CEL |
| 08  | Ileum-IEC                  | GSM190796    | CEL |
| 07  | Ileum-IEC                  | GSM190795    | CEL |
| 06  | Ileum-IEC                  | GSM190794    | CEL |
| 05  | Ileum-IEC                  | GSM190793    | CEL |
| 04  | Ileum-IEC                  | GSM190792    | CEL |
| 03  | Ileum-IEC                  | GSM190791    | CEL |
| 02  | Ileum-IEC                  | GSM190790    | CEL |
| 01  | Ileum-IEC                  | GSM190789    | CEL |



Cluster0333\_intestine-related (7 nodes)

1,453.7  
 1,377.1  
 1,300.6  
 1,224.1  
 1,147.6  
 1,071.1  
 994.6  
 918.1  
 841.6  
 765.1  
 688.6  
 612.1  
 535.6  
 459  
 382.5  
 306  
 229.5  
 153  
 76.5  
 0

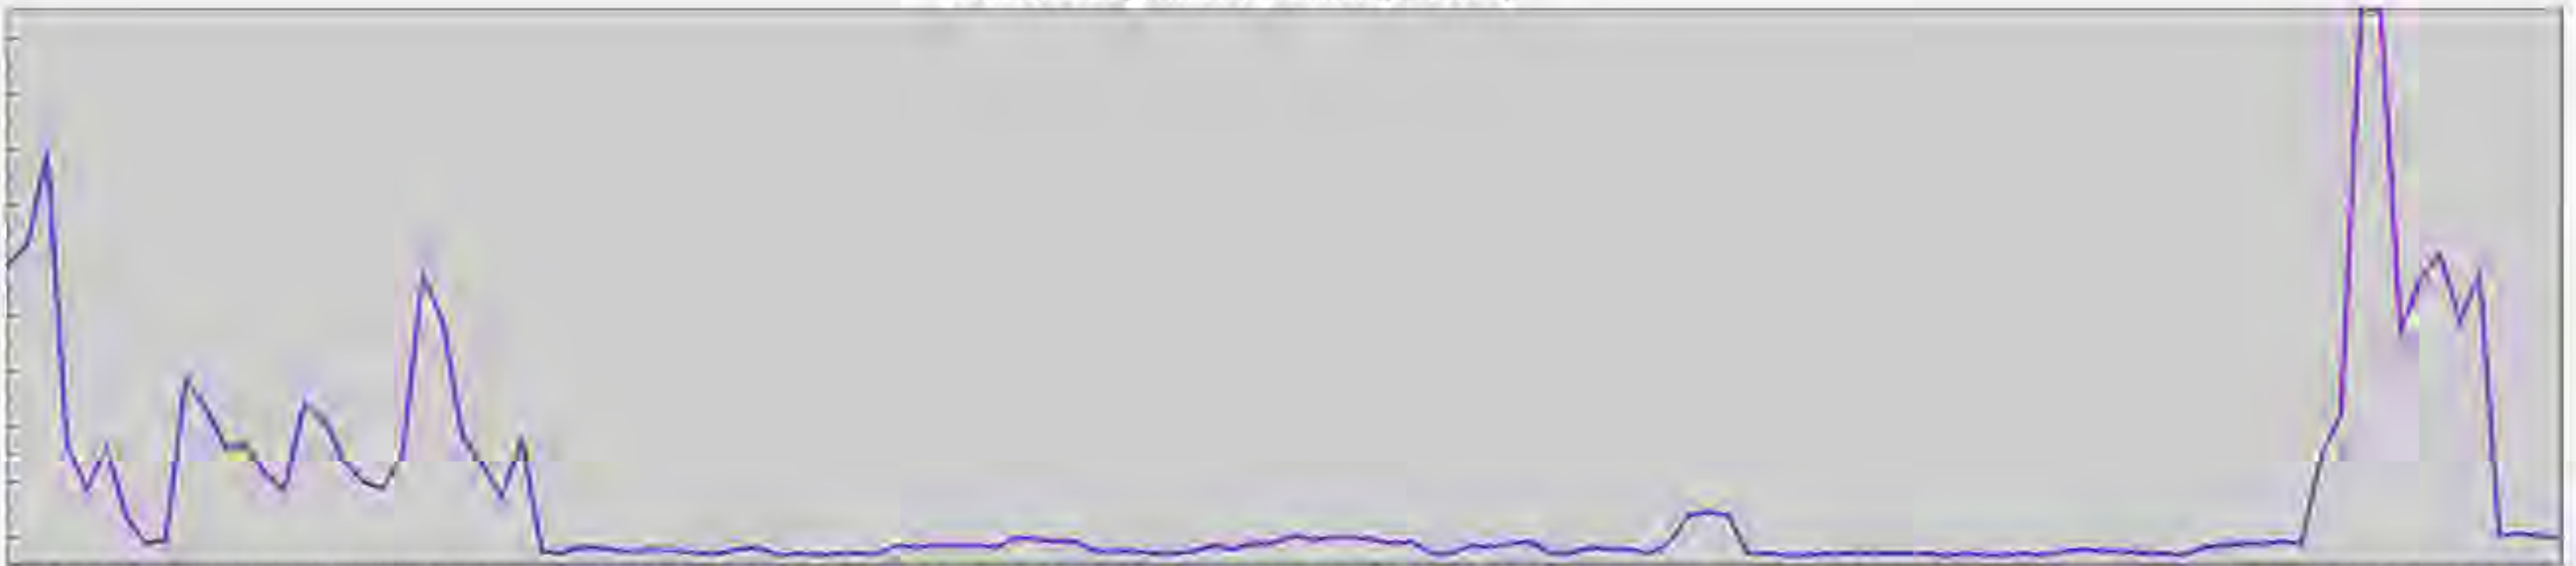

01-PP-M-cells\_GSM190789.CEL  
 02-PP-M-cells\_GSM190790.CEL  
 03-PP-M-cells\_GSM190791.CEL  
 04-CT-v-M-cells\_GSM190792.CEL  
 05-CT-v-M-cells\_GSM190793.CEL  
 06-CT-v-M-cells\_GSM190794.CEL  
 07-Ileum-IEC\_GSM190795.CEL  
 08-Ileum-IEC\_GSM190796.CEL  
 09-Ileum-IEC\_GSM190797.CEL  
 10-FAE-RMPYEP001001.CEL  
 11-FAE-RMPYEP002001.CEL  
 12-SmallIntestine-epithelium\_RMINEP001001.CEL  
 13-SmallIntestine-epithelium\_RMINEP002001.CEL  
 14-Ileum-IEC\_GSM350371.CEL  
 15-Ileum-IEC\_GSM350375.CEL  
 16-Colon-IEC-Gf\_GSM349880.CEL  
 17-Colon-VIII\_GSM480362.CEL  
 18-Colon-VIII\_GSM480363.CEL  
 19-Colon-VIII\_GSM480364.CEL  
 20-Colon-Crypt\_GSM480374.CEL  
 21-Colon-Crypt\_GSM480375.CEL  
 22-Paneth-cells\_GSM318590.CEL  
 23-Paneth-cells\_GSM318589.CEL  
 24-Paneth-cells\_GSM116350.CEL  
 25-Paneth-cells\_GSM116359.CEL  
 26-Paneth-cells-Gf-1\_GSM116357.CEL  
 27-Paneth-cells-Gf-1\_GSM116358.CEL  
 28-Bone marrow\_GSM258627.CEL  
 29-Bone marrow\_GSM258628.CEL  
 30-HSC\_GSM258770.CEL  
 31-HSC\_GSM258771.CEL  
 32-MEP\_GSM258772.CEL  
 33-MEP\_GSM258773.CEL  
 34-MEP\_GSM258774.CEL  
 35-MEP\_GSM258775.CEL  
 36-MEP\_GSM258776.CEL  
 37-MEP\_GSM258777.CEL  
 38-Granulocytes\_GSM258667.CEL  
 39-Granulocytes\_GSM258668.CEL  
 40-Mast-cells\_GSM258712.CEL  
 41-Mast-cells\_GSM258713.CEL  
 42-Mast-cells-Gf\_GSM258714.CEL  
 43-Mast-cells-Gf\_GSM258715.CEL  
 44-Mast-cells-Gf+Ad\_GSM258718.CEL  
 45-Mast-cells-Gf+Ad\_GSM258719.CEL  
 46-NK-cells\_GSM258732.CEL  
 47-NK-cells\_GSM258733.CEL  
 48-CD8a+DC\_GSM258646.CEL  
 49-CD8a+DC\_GSM258647.CEL  
 50-CD8a-DC\_GSM258647.CEL  
 51-CD8a-DC\_GSM258647.CEL  
 52-Plasmacytoid-DC\_GSM258650.CEL  
 53-Plasmacytoid-DC\_GSM258649.CEL  
 54-BMM-GSM258694.CEL  
 55-BMM-GSM258694.CEL  
 56-BMM-LPS-6h\_GSM258699.CEL  
 57-BMM-LPS-6h\_GSM258700.CEL  
 58-BMM-LPS-7h\_GSM258702.CEL  
 59-BMM-LPS-7h\_GSM258702.CEL  
 60-BMM-LPS-7h\_GSM258706.CEL  
 61-BMM-LPS-7h\_GSM258706.CEL  
 62-Microglia\_GSM258721.CEL  
 63-Microglia\_GSM258721.CEL  
 64-Osteoclasts\_GSM258743.CEL  
 65-Osteoclasts\_GSM258744.CEL  
 66-Thymocyte-DN\_GSM465595.CEL  
 67-T-cells-CD4+\_GSM258773.CEL  
 68-T-cells-CD4+\_GSM258774.CEL  
 69-T-cells-CD8+\_GSM258775.CEL  
 70-T-cells-CD8+\_GSM258776.CEL  
 71-Tregs\_GSM258778.CEL  
 72-Tregs\_GSM258778.CEL  
 73-BAF3\_GSM258620.CEL  
 74-BAF3\_GSM258620.CEL  
 75-MZ-Bcell\_GSM258622.CEL  
 76-MZ-Bcell\_GSM258622.CEL  
 77-Follicular-Bcells\_GSM258664.CEL  
 78-Follicular-Bcells\_GSM258664.CEL  
 79-E-LY-RMLNDC002001.CEL  
 80-E-LY-RMLNDC003001.CEL  
 81-PP-FDC\_GSM481976.CEL  
 82-PP-FDC\_GSM481976.CEL  
 83-PP-FDC\_GSM481977.CEL  
 84-Lymph-endo-cells\_GSM143704.CEL  
 85-MS-1\_GSM234692.CEL  
 86-LTcell\_GSM465596.CEL  
 87-NatHelpercell\_GSM465593.CEL  
 88-NatHelpercell\_GSM465594.CEL  
 89-Chondrocytes\_GSM266741.CEL  
 90-Chondrocytes\_GSM266741.CEL  
 91-Osteoblast-d5\_GSM258741.CEL  
 92-Osteoblast-d5\_GSM258742.CEL  
 93-Osteoblast-d14\_GSM258737.CEL  
 94-Osteoblast-d21\_GSM258738.CEL  
 95-Osteoblast-d21\_GSM258739.CEL  
 96-Osteoblast-d21\_GSM258740.CEL  
 97-10T12\_GSM258632.CEL  
 98-10T12\_GSM258632.CEL  
 99-3T3-L1\_GSM258609.CEL  
 100-3T3-L1\_GSM258610.CEL  
 101-NH3T3\_GSM258739.CEL  
 102-NH3T3\_GSM258739.CEL  
 103-C2C12\_GSM258629.CEL  
 104-C2C12\_GSM258630.CEL  
 105-Bruce4\_GSM258690.CEL  
 106-Bruce4\_GSM258690.CEL  
 107-MIMCD3\_GSM258723.CEL  
 108-MIMCD3\_GSM258723.CEL  
 109-mim6\_GSM258725.CEL  
 110-mim6\_GSM258726.CEL  
 111-Astrocytes\_GSM241898.CEL  
 112-Astrocytes\_GSM241898.CEL  
 113-Spleen\_GSM258767.CEL  
 114-Spleen\_GSM258767.CEL  
 115-Lymph-nodes\_GSM258691.CEL  
 116-Lymph-nodes\_GSM258691.CEL  
 117-Lymph-nodes\_GSM258691.CEL  
 118-Intestine-small\_GSM258677.CEL  
 119-Intestine-small\_GSM258677.CEL  
 120-Intestine-large\_GSM258675.CEL  
 121-Intestine-large\_GSM258675.CEL  
 122-Intestine-large\_GSM258676.CEL  
 123-Colon-d4\_GSM198810.CEL  
 124-Colon-d4\_GSM198810.CEL  
 125-Colon-d9\_GSM198810.CEL  
 126-Colon-d9\_GSM198810.CEL  
 127-NALT\_GSM289408.CEL  
 128-NALT\_GSM289409.CEL  
 129-NALT\_GSM289410.CEL  
 130-NALT\_GSM289411.CEL



Cluster0334\_House keeping (7 nodes)

595.2  
563.9  
532.5  
501.2  
469.9  
438.6  
407.2  
375.9  
344.6  
313.3  
281.9  
250.6  
219.3  
188  
158.6  
125.3  
94  
62.7  
31.3  
0

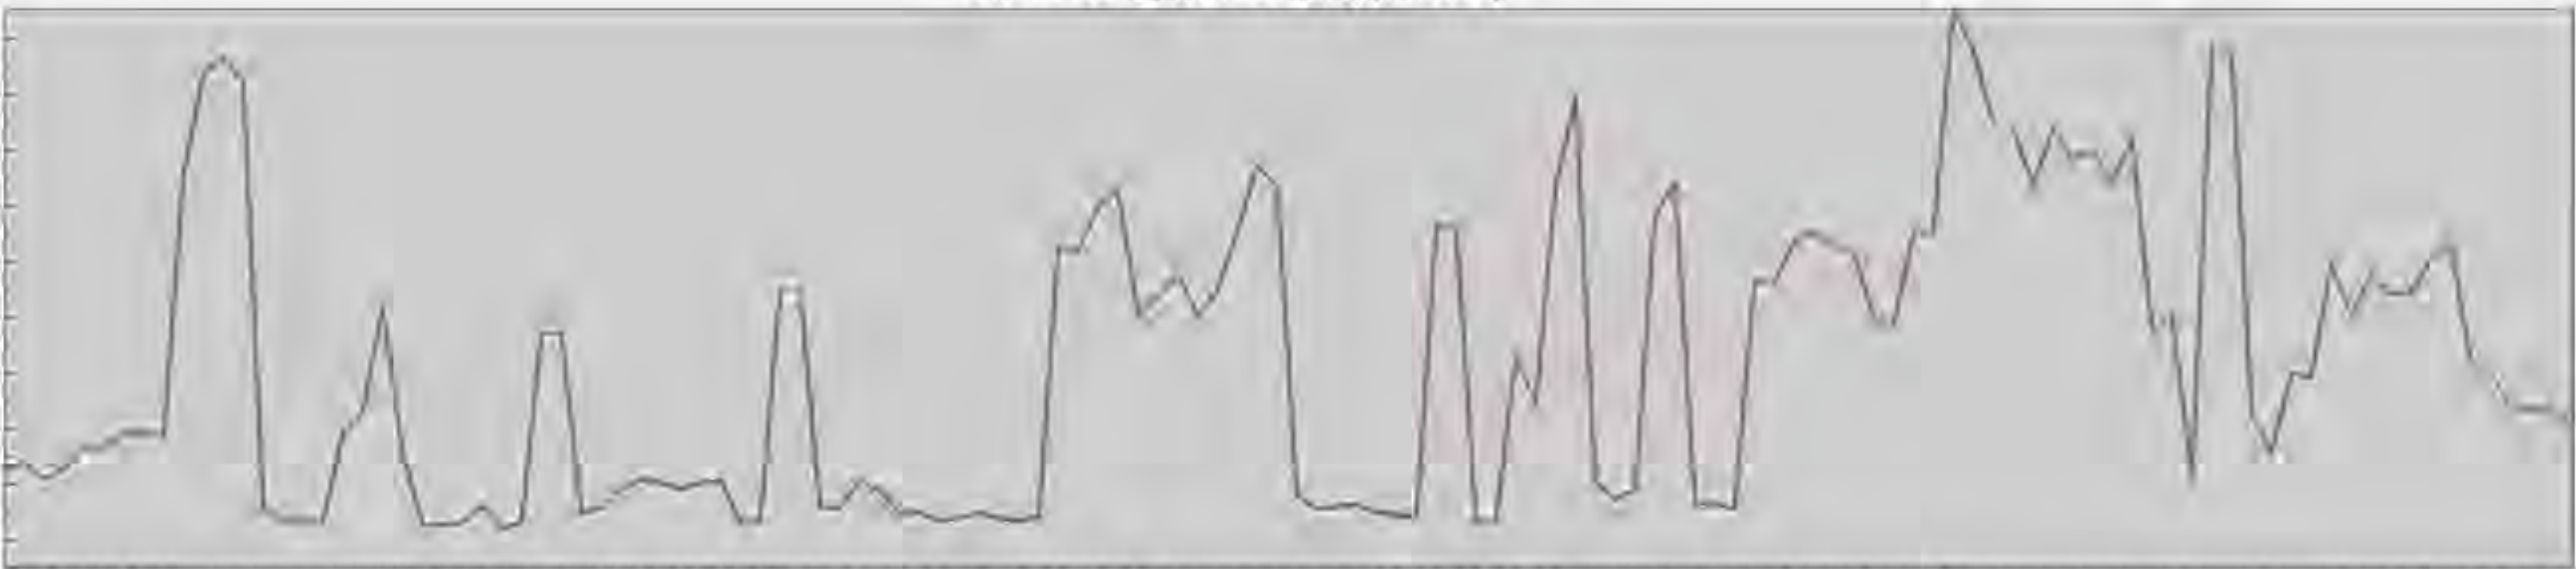

130- NALT GSM2899411.CEL  
129- NALT GSM2899410.CEL  
128- NALT GSM2899409.CEL  
127- NALT GSM2899408.CEL  
126- Colon-d9 GSM1988105.CEL  
125- Colon-d9 GSM1988104.CEL  
124- Colon-d9 GSM1988103.CEL  
123- Colon-d4 GSM1988102.CEL  
122- Colon-d4 GSM1988101.CEL  
121- Intestine-large GSM258676.CEL  
120- Intestine-large GSM258675.CEL  
119- Intestine-small GSM258678.CEL  
118- Intestine-small GSM258692.CEL  
117- Lymph-nodes GSM258691.CEL  
116- Spleen GSM258766.CEL  
115- Spleen GSM258767.CEL  
114- Neuro2a GSM258728.CEL  
113- Neuro2a GSM258729.CEL  
112- Astrocytes GSM241898.CEL  
111- Astrocytes GSM241899.CEL  
110- mimb GSM258726.CEL  
109- mimb GSM258725.CEL  
108- MIMCD3 GSM258724.CEL  
107- MIMCD3 GSM258723.CEL  
106- Bruce4 GSM258656.CEL  
105- Bruce4 GSM258655.CEL  
104- C2C12 GSM258690.CEL  
103- C2C12 GSM258629.CEL  
102- NIH3T3 GSM258730.CEL  
101- NIH3T3 GSM258729.CEL  
100- 3T3-L1 GSM258610.CEL  
99- 3T3-L1 GSM258609.CEL  
98- 10T12 GSM258632.CEL  
97- 10T12 GSM258631.CEL  
96- Osteoblast-d21 GSM258740.CEL  
95- Osteoblast-d21 GSM258739.CEL  
94- Osteoblast-d14 GSM258738.CEL  
93- Osteoblast-d14 GSM258737.CEL  
92- Osteoblast-d5 GSM258742.CEL  
91- Osteoblast-d5 GSM258741.CEL  
90- Chondrocytes GSM266741.CEL  
89- Chondrocytes GSM266740.CEL  
88- Nat Helper cell GSM465594.CEL  
87- Nat Helper cell GSM465593.CEL  
86- Tt cell GSM465596.CEL  
85- MS-1 GSM234692.CEL  
84- Lymph-endo-cells GSM143704.CEL  
83- PP-FDC GSM481977.CEL  
82- PP-FDC GSM481978.CEL  
81- PP-FDC GSM481976.CEL  
80- FLY RMLNDCC003001.CEL  
79- FLY RMLNDCC003001.CEL  
78- Follicular-Bcells GSM258664.CEL  
77- Follicular-Bcells GSM258665.CEL  
76- MZ-Bcell GSM258622.CEL  
75- MZ-Bcell GSM258621.CEL  
74- BAF3 GSM258620.CEL  
73- BAF3 GSM258619.CEL  
72- Tregs GSM258778.CEL  
71- Tregs GSM258777.CEL  
70- T-cells-CD8+ GSM258776.CEL  
69- T-cells-CD8+ GSM258775.CEL  
68- T-cells-CD4+ GSM258774.CEL  
67- T-cells-CD4+ GSM258773.CEL  
66- Thymocyte-DN GSM465595.CEL  
65- Osteoclasts GSM258744.CEL  
64- Microglia GSM258721.CEL  
63- Microglia GSM258721.CEL  
62- MM-LPS-7h GSM268706.CEL  
61- MM-LPS-7h GSM268705.CEL  
60- MM-LPS-6h GSM258702.CEL  
59- MM-LPS-6h GSM258701.CEL  
58- MM-LPS-6h GSM258699.CEL  
57- MM-LPS-6h GSM258699.CEL  
56- BMM-LPS-6h GSM258694.CEL  
55- BMM-LPS-6h GSM258694.CEL  
54- BMM-LPS-6h GSM258694.CEL  
53- BMM-LPS-6h GSM258694.CEL  
52- BMM-LPS-6h GSM258694.CEL  
51- BMM-LPS-6h GSM258694.CEL  
50- CD8a-DC GSM258647.CEL  
49- CD8a-DC GSM258647.CEL  
48- CD8a+DC GSM258646.CEL  
47- NK-cells GSM258732.CEL  
46- NK-cells GSM258731.CEL  
45- Mast-cells-IgE+Ad GSM258718.CEL  
44- Mast-cells-IgE+Ad GSM258717.CEL  
43- Mast-cells-IgE GSM258714.CEL  
42- Mast-cells-IgE GSM258713.CEL  
41- Mast-cells GSM258712.CEL  
40- Mast-cells GSM258711.CEL  
39- Granulocytes GSM258668.CEL  
38- Granulocytes GSM258667.CEL  
37- GMP GSM258666.CEL  
36- GMP GSM258666.CEL  
35- GMP GSM258666.CEL  
34- GMP GSM258666.CEL  
33- MIEP GSM2588720.CEL  
32- MIEP GSM2588720.CEL  
31- HSC GSM2588719.CEL  
30- HSC GSM2588719.CEL  
29- Bone marrow GSM258628.CEL  
28- Bone marrow GSM258627.CEL  
27- paneth-cells-GE GSM116358.CEL  
26- paneth-cells-GE GSM116357.CEL  
25- paneth-cells GSM116350.CEL  
24- paneth-cells GSM116359.CEL  
23- paneth-cells GSM318589.CEL  
22- paneth-cells GSM318590.CEL  
21- Colon-Crypt GSM480375.CEL  
20- Colon-Crypt GSM480374.CEL  
19- Colon-Vill GSM480363.CEL  
18- Colon-Vill GSM480362.CEL  
17- Colon-IEC-GE GSM349880.CEL  
16- Colon-IEC-GE GSM350375.CEL  
15- Ileum-IEC GSM350376.CEL  
14- Ileum-IEC GSM350371.CEL  
13- Small-intestine-epithelium RMINEP002001.CEL  
12- Small-intestine-epithelium RMINEP001001.CEL  
11- FAE RMPYEP002001.CEL  
10- FAE RMPYEP001001.CEL  
09- Ileum-IEC GSM190797.CEL  
08- Ileum-IEC GSM190796.CEL  
07- Ileum-IEC GSM190795.CEL  
06- CT-v-M-cells GSM190794.CEL  
05- CT-v-M-cells GSM190793.CEL  
04- CT-v-M-cells GSM190792.CEL  
03- PP-M-cells GSM190791.CEL  
02- PP-M-cells GSM190790.CEL  
01- PP-M-cells GSM190789.CEL



Cluster0335\_Small intestine-related (7 nodes)

10,675.4  
10,113.5  
9,551.7  
8,989.8  
8,428  
7,868.1  
7,304.2  
6,742.4  
6,180.5  
5,618.6  
5,056.8  
4,494.9  
3,933  
3,371.2  
2,809.3  
2,247.5  
1,685.6  
1,123.7  
561.9  
0

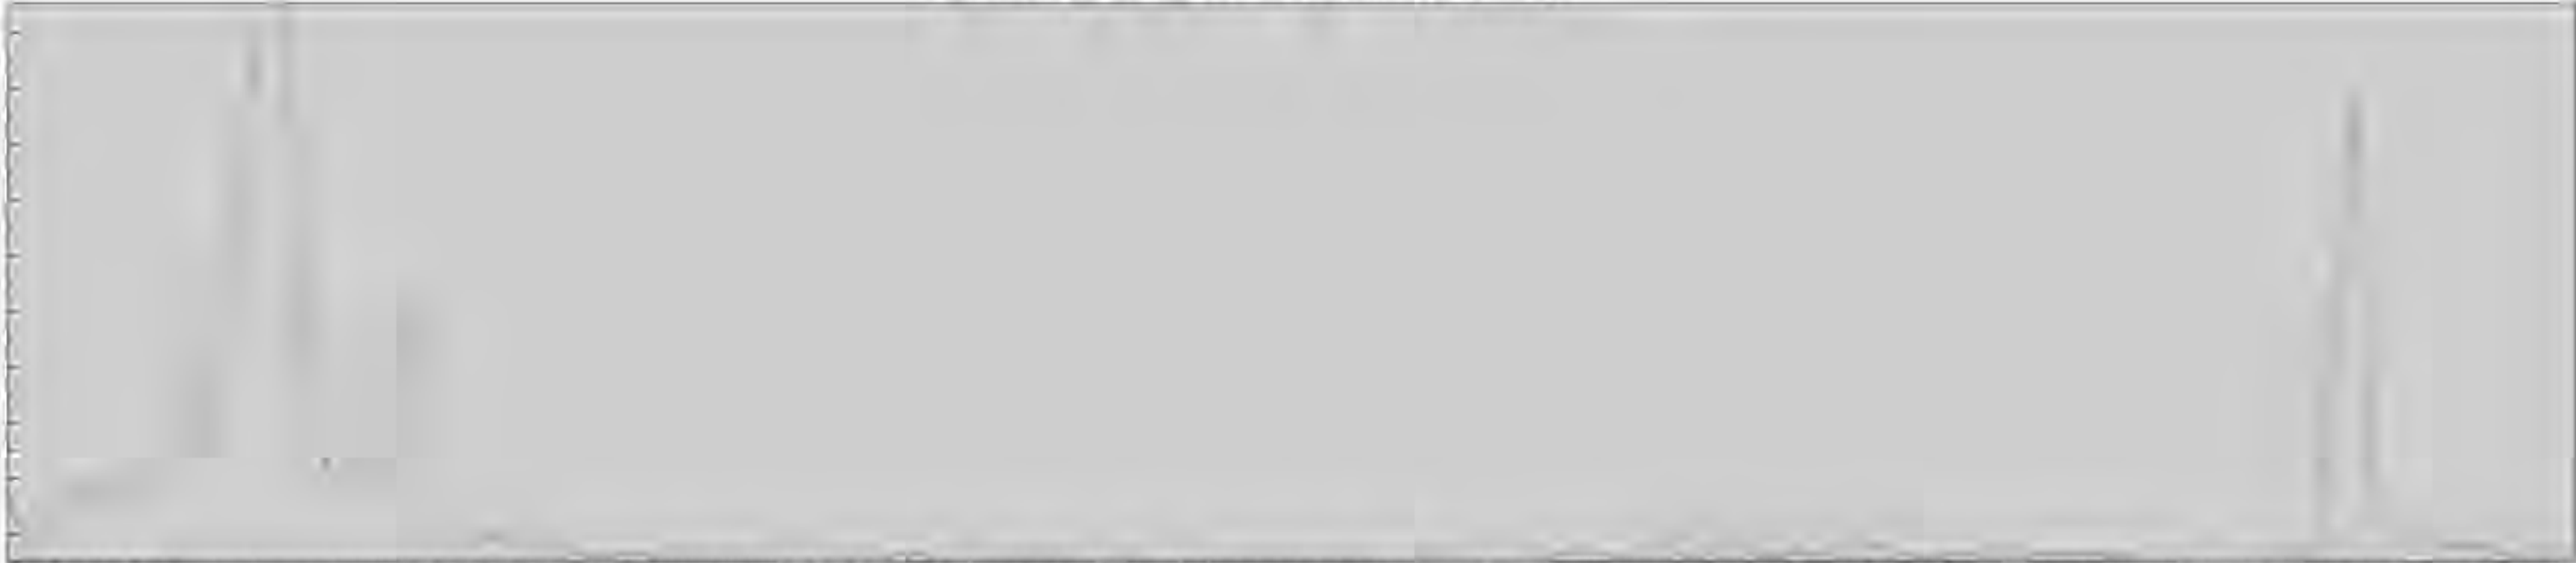

|     |                            |              |     |
|-----|----------------------------|--------------|-----|
| 101 | PP-M-cells                 | GSM190789    | CEL |
| 102 | PP-M-cells                 | GSM190790    | CEL |
| 04  | CT-v-M-cells               | GSM190792    | CEL |
| 05  | CT-v-M-cells               | GSM190793    | CEL |
| 06  | CT-v-M-cells               | GSM190794    | CEL |
| 07  | Ileum-EC                   | GSM190795    | CEL |
| 08  | Ileum-EC                   | GSM190796    | CEL |
| 09  | Ileum-EC                   | GSM190797    | CEL |
| 10  | FAE-RMP                    | GSM190798    | CEL |
| 11  | FAE-RMP                    | GSM190799    | CEL |
| 12  | Small intestine-epithelium | RMINEP001001 | CEL |
| 13  | Small intestine-epithelium | RMINEP002001 | CEL |
| 14  | Ileum-EC                   | GSM350371    | CEL |
| 15  | Colon-EC                   | GSM350375    | CEL |
| 16  | Colon-VIII                 | GSM480362    | cel |
| 17  | Colon-VIII                 | GSM480363    | cel |
| 18  | Colon-VIII                 | GSM480364    | cel |
| 19  | Colon-VIII                 | GSM480365    | cel |
| 20  | Colon-Crypt                | GSM480374    | cel |
| 21  | Colon-Crypt                | GSM480375    | cel |
| 22  | Paneth-cells               | GSM318589    | CEL |
| 23  | Paneth-cells               | GSM318590    | CEL |
| 24  | Paneth-cells               | GSM116359    | CEL |
| 25  | Paneth-cells               | GSM116360    | CEL |
| 26  | Paneth-cells               | GSM116361    | CEL |
| 27  | Paneth-cells               | GSM116362    | CEL |
| 28  | Bone marrow                | GSM258627    | CEL |
| 29  | Bone marrow                | GSM258628    | CEL |
| 30  | NALT                       | GSM289410    | CEL |
| 31  | NALT                       | GSM289411    | CEL |
| 32  | NALT                       | GSM289412    | CEL |
| 33  | NALT                       | GSM289413    | CEL |
| 34  | Color-d9                   | GSM198810    | CEL |
| 35  | Color-d9                   | GSM198811    | CEL |
| 36  | Color-d9                   | GSM198812    | CEL |
| 37  | Color-d4                   | GSM198813    | CEL |
| 38  | Color-d4                   | GSM198814    | CEL |
| 39  | Color-d4                   | GSM198815    | CEL |
| 40  | Intestine-large            | GSM258675    | CEL |
| 41  | Intestine-large            | GSM258676    | CEL |
| 42  | Intestine-small            | GSM258677    | CEL |
| 43  | Intestine-small            | GSM258678    | CEL |
| 44  | Spleen                     | GSM258679    | CEL |
| 45  | Spleen                     | GSM258680    | CEL |
| 46  | Neuro2a                    | GSM241898    | CEL |
| 47  | Neuro2a                    | GSM241899    | CEL |
| 48  | Astrocytes                 | GSM241900    | CEL |
| 49  | ming                       | GSM258726    | CEL |
| 50  | ming                       | GSM258727    | CEL |
| 51  | ming                       | GSM258728    | CEL |
| 52  | MIMCD3                     | GSM258729    | CEL |
| 53  | MIMCD3                     | GSM258730    | CEL |
| 54  | MIMCD3                     | GSM258731    | CEL |
| 55  | Bruce4                     | GSM258732    | CEL |
| 56  | Bruce4                     | GSM258733    | CEL |
| 57  | C2C12                      | GSM258734    | CEL |
| 58  | C2C12                      | GSM258735    | CEL |
| 59  | NH3T3                      | GSM258736    | CEL |
| 60  | NH3T3                      | GSM258737    | CEL |
| 61  | 3T3-L1                     | GSM258610    | CEL |
| 62  | 3T3-L1                     | GSM258609    | CEL |
| 63  | 10T1/2                     | GSM258632    | CEL |
| 64  | 10T1/2                     | GSM258631    | CEL |
| 65  | Osteoblast-d21             | GSM258740    | CEL |
| 66  | Osteoblast-d21             | GSM258739    | CEL |
| 67  | Osteoblast-d14             | GSM258738    | CEL |
| 68  | Osteoblast-d14             | GSM258737    | CEL |
| 69  | Osteoblast-d5              | GSM258742    | CEL |
| 70  | Osteoblast-d5              | GSM258741    | CEL |
| 71  | Chondrocytes               | GSM258740    | CEL |
| 72  | Chondrocytes               | GSM258741    | CEL |
| 73  | Nat Helper cell            | GSM465594    | CEL |
| 74  | Nat Helper cell            | GSM465593    | CEL |
| 75  | MS-1                       | GSM234692    | CEL |
| 76  | Lymph-endo-cells           | GSM143704    | CEL |
| 77  | FDC                        | GSM481977    | CEL |
| 78  | FDC                        | GSM481978    | CEL |
| 79  | FDC                        | GSM481979    | CEL |
| 80  | FDC                        | GSM481976    | CEL |
| 81  | LY-RMLND                   | GSM258620    | CEL |
| 82  | LY-RMLND                   | GSM258619    | CEL |
| 83  | Tregs                      | GSM258778    | CEL |
| 84  | Tregs                      | GSM258777    | CEL |
| 85  | Tregs                      | GSM258776    | CEL |
| 86  | T-cells-CD8+               | GSM258775    | CEL |
| 87  | T-cells-CD8+               | GSM258774    | CEL |
| 88  | T-cells-CD4+               | GSM258773    | CEL |
| 89  | T-cells-CD4+               | GSM258772    | CEL |
| 90  | Thymocyte-DN               | GSM465595    | CEL |
| 91  | Osteoclasts                | GSM258743    | CEL |
| 92  | Osteoclasts                | GSM258744    | CEL |
| 93  | Microglia                  | GSM258721    | CEL |
| 94  | Microglia                  | GSM258720    | CEL |
| 95  | PS-7h                      | GSM258705    | CEL |
| 96  | PS-7h                      | GSM258704    | CEL |
| 97  | PS-6h                      | GSM258703    | CEL |
| 98  | PS-6h                      | GSM258702    | CEL |
| 99  | PS-6h                      | GSM258699    | CEL |
| 100 | PS-6h                      | GSM258694    | CEL |
| 101 | PS-6h                      | GSM258693    | CEL |
| 102 | PS-6h                      | GSM258692    | CEL |
| 103 | PS-6h                      | GSM258691    | CEL |
| 104 | PS-6h                      | GSM258690    | CEL |
| 105 | PS-6h                      | GSM258689    | CEL |
| 106 | PS-6h                      | GSM258688    | CEL |
| 107 | PS-6h                      | GSM258687    | CEL |
| 108 | PS-6h                      | GSM258686    | CEL |
| 109 | PS-6h                      | GSM258685    | CEL |
| 110 | PS-6h                      | GSM258684    | CEL |
| 111 | PS-6h                      | GSM258683    | CEL |
| 112 | PS-6h                      | GSM258682    | CEL |
| 113 | PS-6h                      | GSM258681    | CEL |
| 114 | PS-6h                      | GSM258680    | CEL |
| 115 | PS-6h                      | GSM258679    | CEL |
| 116 | PS-6h                      | GSM258678    | CEL |
| 117 | PS-6h                      | GSM258677    | CEL |
| 118 | PS-6h                      | GSM258676    | CEL |
| 119 | PS-6h                      | GSM258675    | CEL |
| 120 | PS-6h                      | GSM258674    | CEL |
| 121 | PS-6h                      | GSM258673    | CEL |
| 122 | PS-6h                      | GSM258672    | CEL |
| 123 | PS-6h                      | GSM258671    | CEL |
| 124 | PS-6h                      | GSM258670    | CEL |
| 125 | PS-6h                      | GSM258669    | CEL |
| 126 | PS-6h                      | GSM258668    | CEL |
| 127 | PS-6h                      | GSM258667    | CEL |
| 128 | PS-6h                      | GSM258666    | CEL |
| 129 | PS-6h                      | GSM258665    | CEL |
| 130 | PS-6h                      | GSM258664    | CEL |
| 131 | PS-6h                      | GSM258663    | CEL |
| 132 | PS-6h                      | GSM258662    | CEL |
| 133 | PS-6h                      | GSM258661    | CEL |
| 134 | PS-6h                      | GSM258660    | CEL |
| 135 | PS-6h                      | GSM258659    | CEL |
| 136 | PS-6h                      | GSM258658    | CEL |
| 137 | PS-6h                      | GSM258657    | CEL |
| 138 | PS-6h                      | GSM258656    | CEL |
| 139 | PS-6h                      | GSM258655    | CEL |
| 140 | PS-6h                      | GSM258654    | CEL |
| 141 | PS-6h                      | GSM258653    | CEL |
| 142 | PS-6h                      | GSM258652    | CEL |
| 143 | PS-6h                      | GSM258651    | CEL |
| 144 | PS-6h                      | GSM258650    | CEL |
| 145 | PS-6h                      | GSM258649    | CEL |
| 146 | PS-6h                      | GSM258648    | CEL |
| 147 | PS-6h                      | GSM258647    | CEL |
| 148 | PS-6h                      | GSM258646    | CEL |
| 149 | PS-6h                      | GSM258645    | CEL |
| 150 | PS-6h                      | GSM258644    | CEL |
| 151 | PS-6h                      | GSM258643    | CEL |
| 152 | PS-6h                      | GSM258642    | CEL |
| 153 | PS-6h                      | GSM258641    | CEL |
| 154 | PS-6h                      | GSM258640    | CEL |
| 155 | PS-6h                      | GSM258639    | CEL |
| 156 | PS-6h                      | GSM258638    | CEL |
| 157 | PS-6h                      | GSM258637    | CEL |
| 158 | PS-6h                      | GSM258636    | CEL |
| 159 | PS-6h                      | GSM258635    | CEL |
| 160 | PS-6h                      | GSM258634    | CEL |
| 161 | PS-6h                      | GSM258633    | CEL |
| 162 | PS-6h                      | GSM258632    | CEL |
| 163 | PS-6h                      | GSM258631    | CEL |
| 164 | PS-6h                      | GSM258630    | CEL |
| 165 | PS-6h                      | GSM258629    | CEL |
| 166 | PS-6h                      | GSM258628    | CEL |
| 167 | PS-6h                      | GSM258627    | CEL |
| 168 | PS-6h                      | GSM258626    | CEL |
| 169 | PS-6h                      | GSM258625    | CEL |
| 170 | PS-6h                      | GSM258624    | CEL |
| 171 | PS-6h                      | GSM258623    | CEL |
| 172 | PS-6h                      | GSM258622    | CEL |
| 173 | PS-6h                      | GSM258621    | CEL |
| 174 | PS-6h                      | GSM258620    | CEL |
| 175 | PS-6h                      | GSM258619    | CEL |
| 176 | PS-6h                      | GSM258618    | CEL |
| 177 | PS-6h                      | GSM258617    | CEL |
| 178 | PS-6h                      | GSM258616    | CEL |
| 179 | PS-6h                      | GSM258615    | CEL |
| 180 | PS-6h                      | GSM258614    | CEL |
| 181 | PS-6h                      | GSM258613    | CEL |
| 182 | PS-6h                      | GSM258612    | CEL |
| 183 | PS-6h                      | GSM258611    | CEL |
| 184 | PS-6h                      | GSM258610    | CEL |
| 185 | PS-6h                      | GSM258609    | CEL |
| 186 | PS-6h                      | GSM258608    | CEL |
| 187 | PS-6h                      | GSM258607    | CEL |
| 188 | PS-6h                      | GSM258606    | CEL |
| 189 | PS-6h                      | GSM258605    | CEL |
| 190 | PS-6h                      | GSM258604    | CEL |
| 191 | PS-6h                      | GSM258603    | CEL |
| 192 | PS-6h                      | GSM258602    | CEL |
| 193 | PS-6h                      | GSM258601    | CEL |
| 194 | PS-6h                      | GSM258600    | CEL |
| 195 | PS-6h                      | GSM258599    | CEL |
| 196 | PS-6h                      | GSM258598    | CEL |
| 197 | PS-6h                      | GSM258597    | CEL |
| 198 | PS-6h                      | GSM258596    | CEL |
| 199 | PS-6h                      | GSM258595    | CEL |
| 200 | PS-6h                      | GSM258594    | CEL |



Cluster0336\_Mesenchyme-related/extracellular matrix (7 nodes)

991.6  
939.4  
887.2  
835  
782.8  
730.7  
678.5  
626.3  
574.1  
521.9  
469.7  
417.5  
365.3  
313.1  
260.9  
208.8  
156.6  
104.4  
52.2  
0

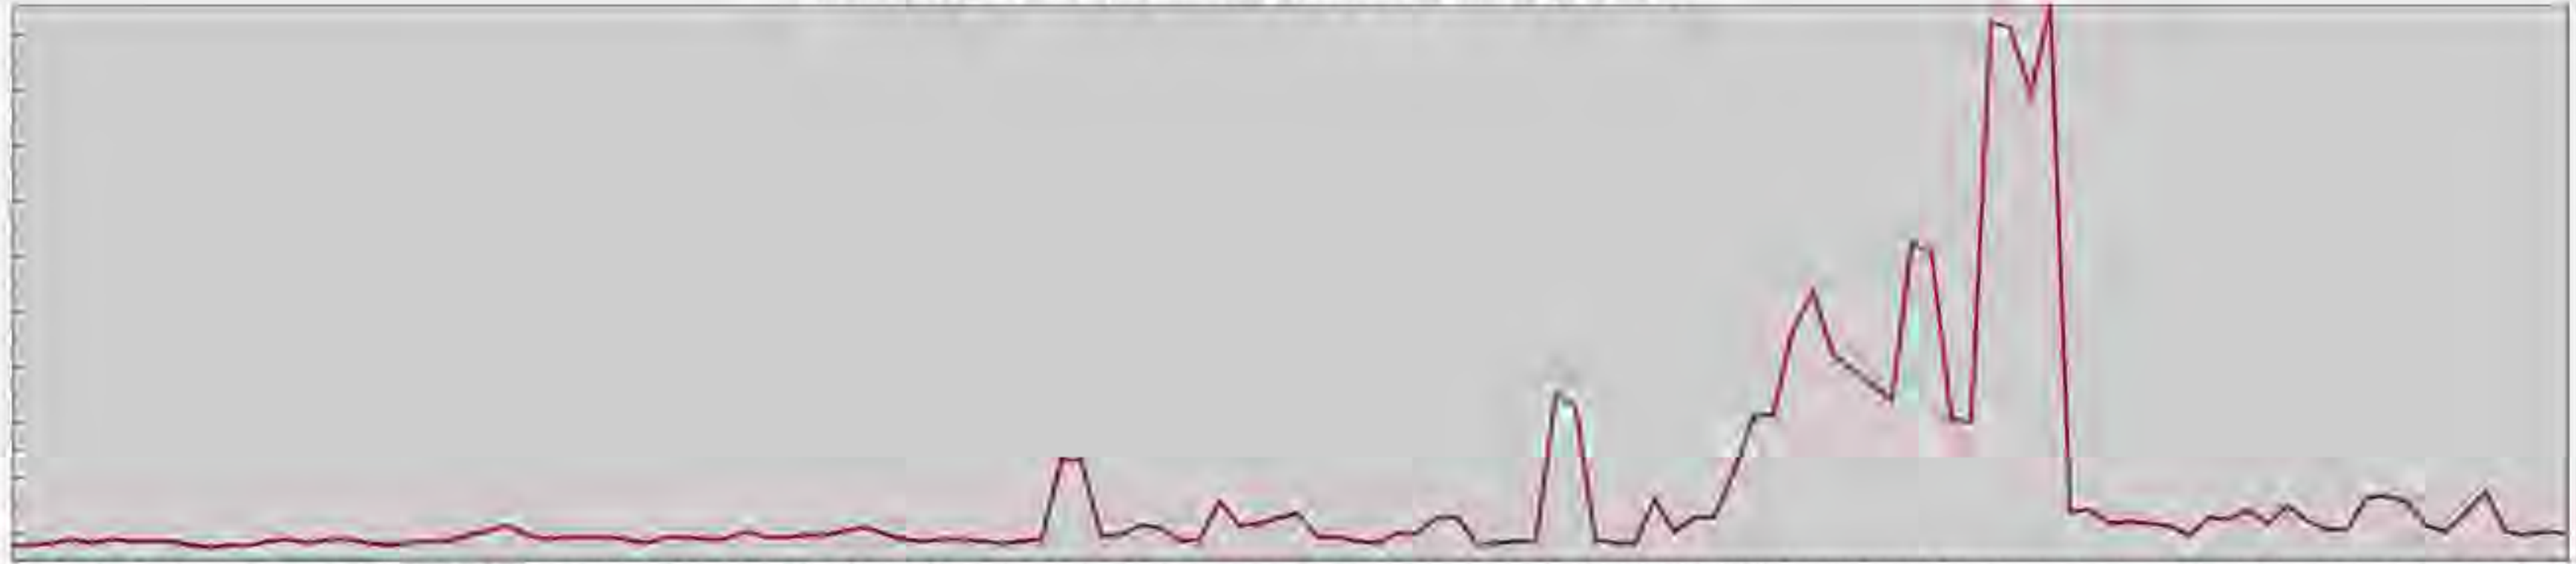

130- NALT GSM289411 CELL  
129- NALT GSM289410 CELL  
128- NALT GSM289409 CELL  
127- NALT GSM289408 CELL  
126- Colon-d9 GSM1988105 CELL  
125- Colon-d9 GSM1988104 CELL  
124- Colon-d9 GSM1988103 CELL  
123- Colon-d4 GSM1988102 CELL  
122- Colon-d4 GSM1988101 CELL  
121- Intestine-large GSM258676 CELL  
120- Intestine-large GSM258675 CELL  
119- Intestine-small GSM258674 CELL  
118- Intestine-small GSM258673 CELL  
117- Lymph-nodes GSM258672 CELL  
116- Lymph-nodes GSM258671 CELL  
115- Spleen GSM258767 CELL  
114- Spleen GSM258766 CELL  
113- Neuro2a GSM258728 CELL  
112- Neuro2a GSM258727 CELL  
111- Astrocytes GSM241898 CELL  
110- mimb GSM258726 CELL  
109- mimb GSM258725 CELL  
108- MIMCD3 GSM258724 CELL  
107- MIMCD3 GSM258723 CELL  
106- Bruce4 GSM258656 CELL  
105- Bruce4 GSM258655 CELL  
104- C2C12 GSM258690 CELL  
103- C2C12 GSM258689 CELL  
102- NIH3T3 GSM258739 CELL  
101- NIH3T3 GSM258738 CELL  
100- 3T3-L1 GSM258610 CELL  
99- 3T3-L1 GSM258609 CELL  
98- 10T1/2 GSM258632 CELL  
97- 10T1/2 GSM258631 CELL  
96- Osteoblast-d21 GSM258740 CELL  
95- Osteoblast-d21 GSM258739 CELL  
94- Osteoblast-d14 GSM258738 CELL  
93- Osteoblast-d14 GSM258737 CELL  
92- Osteoblast-d5 GSM258742 CELL  
91- Osteoblast-d5 GSM258741 CELL  
90- Chondrocytes GSM266741 CELL  
89- Chondrocytes GSM266740 CELL  
88- Nat Helper cell GSM465594 CELL  
87- Nat Helper cell GSM465593 CELL  
86- Tt cell GSM465596 CELL  
85- MS-1 GSM234692 CELL  
84- Lymph-endo-cells GSM143704 CELL  
83- PP-FDC GSM481977 CELL  
82- PP-FDC GSM481978 CELL  
81- PP-FDC GSM481976 CELL  
80- ELY RMLNDCC003001 CELL  
79- ELY RMLNDCC003001 CELL  
78- Follicular-Bcells GSM258664 CELL  
77- MZ-Bcell GSM258627 CELL  
76- MZ-Bcell GSM258627 CELL  
75- BAF3 GSM258620 CELL  
74- BAF3 GSM258619 CELL  
73- Tregs GSM258778 CELL  
72- Tregs GSM258777 CELL  
71- T-cells-CD8+ GSM258776 CELL  
70- T-cells-CD8+ GSM258774 CELL  
69- T-cells-CD4+ GSM258773 CELL  
68- T-cells-CD4+ GSM258744 CELL  
67- Thymocyte-DN GSM465595 CELL  
66- Osteoclasts GSM258743 CELL  
65- Microglia GSM258721 CELL  
64- Microglia GSM258721 CELL  
63- PMM-LPS-7h GSM268706 CELL  
62- PMM-LPS-7h GSM268705 CELL  
61- PMM-LPS-7h GSM268702 CELL  
60- PMM-LPS-6h GSM258701 CELL  
59- BMM-LPS-6h GSM258699 CELL  
58- BMM-LPS-6h GSM258699 CELL  
57- BMM-LPS-6h GSM258694 CELL  
56- BMM-LPS-6h GSM258694 CELL  
55- BMM-LPS-6h GSM258694 CELL  
54- BMM-LPS-6h GSM258694 CELL  
53- BMM-LPS-6h GSM258694 CELL  
52- BMM-LPS-6h GSM258694 CELL  
51- BMM-LPS-6h GSM258694 CELL  
50- CD8a-DC GSM258647 CELL  
49- CD8a-DC GSM258646 CELL  
48- CD8a+DC GSM258646 CELL  
47- NK-cells GSM258732 CELL  
46- NK-cells GSM258731 CELL  
45- Mast-cells-IgE+Ad GSM258719 CELL  
44- Mast-cells-IgE+Ad GSM258718 CELL  
43- Mast-cells-IgE GSM258714 CELL  
42- Mast-cells-IgE GSM258713 CELL  
41- Mast-cells-IgE GSM258712 CELL  
40- Mast-cells-IgE GSM258711 CELL  
39- Granulocytes GSM258667 CELL  
38- Granulocytes GSM258666 CELL  
37- GMP GSM258665 CELL  
36- GMP GSM258665 CELL  
35- GMP GSM258642 CELL  
34- GMP GSM258642 CELL  
33- MIEP GSM258720 CELL  
32- MIEP GSM258719 CELL  
31- HSC GSM258770 CELL  
30- HSC GSM258769 CELL  
29- Bone marrow GSM258628 CELL  
28- Bone marrow GSM258627 CELL  
27- paneth-cells-GE GSM116358 CELL  
26- paneth-cells-GE GSM116357 CELL  
25- paneth-cells-GE GSM116350 CELL  
24- paneth-cells-GE GSM116359 CELL  
23- paneth-cells-GE GSM318589 CELL  
22- paneth-cells-GE GSM318590 CELL  
21- Colon-Crypt GSM480375 CELL  
20- Colon-Crypt GSM480374 CELL  
19- Colon-Vill GSM480363 CELL  
18- Colon-Vill GSM480362 CELL  
17- Colon-IEC-GE GSM349880 CELL  
16- Colon-IEC-GE GSM350375 CELL  
15- Ileum-IEC-TGF GSM350376 CELL  
14- Ileum-IEC GSM350371 CELL  
13- Small-intestine-epithelium RMINEP002001 CELL  
12- Small-intestine-epithelium RMINEP001001 CELL  
11- FAE-RMPYEP002001 CELL  
10- FAE-RMPYEP001001 CELL  
09- Ileum-IEC GSM190797 CELL  
08- Ileum-IEC GSM190796 CELL  
07- Ileum-IEC GSM190795 CELL  
06- CT-v-M-cells GSM190794 CELL  
05- CT-v-M-cells GSM190793 CELL  
04- CT-v-M-cells GSM190792 CELL  
03- PP-M-cells GSM190791 CELL  
02- PP-M-cells GSM190790 CELL  
01- PP-M-cells GSM190789 CELL



Cluster0337\_Uncertain (7 nodes)

2,685.2  
2,543.9  
2,402.6  
2,261.3  
2,119.9  
1,978.6  
1,837.3  
1,695.9  
1,554.6  
1,413.3  
1,272  
1,130.6  
989.3  
848  
706.6  
565.3  
424  
282.7  
141.3  
0

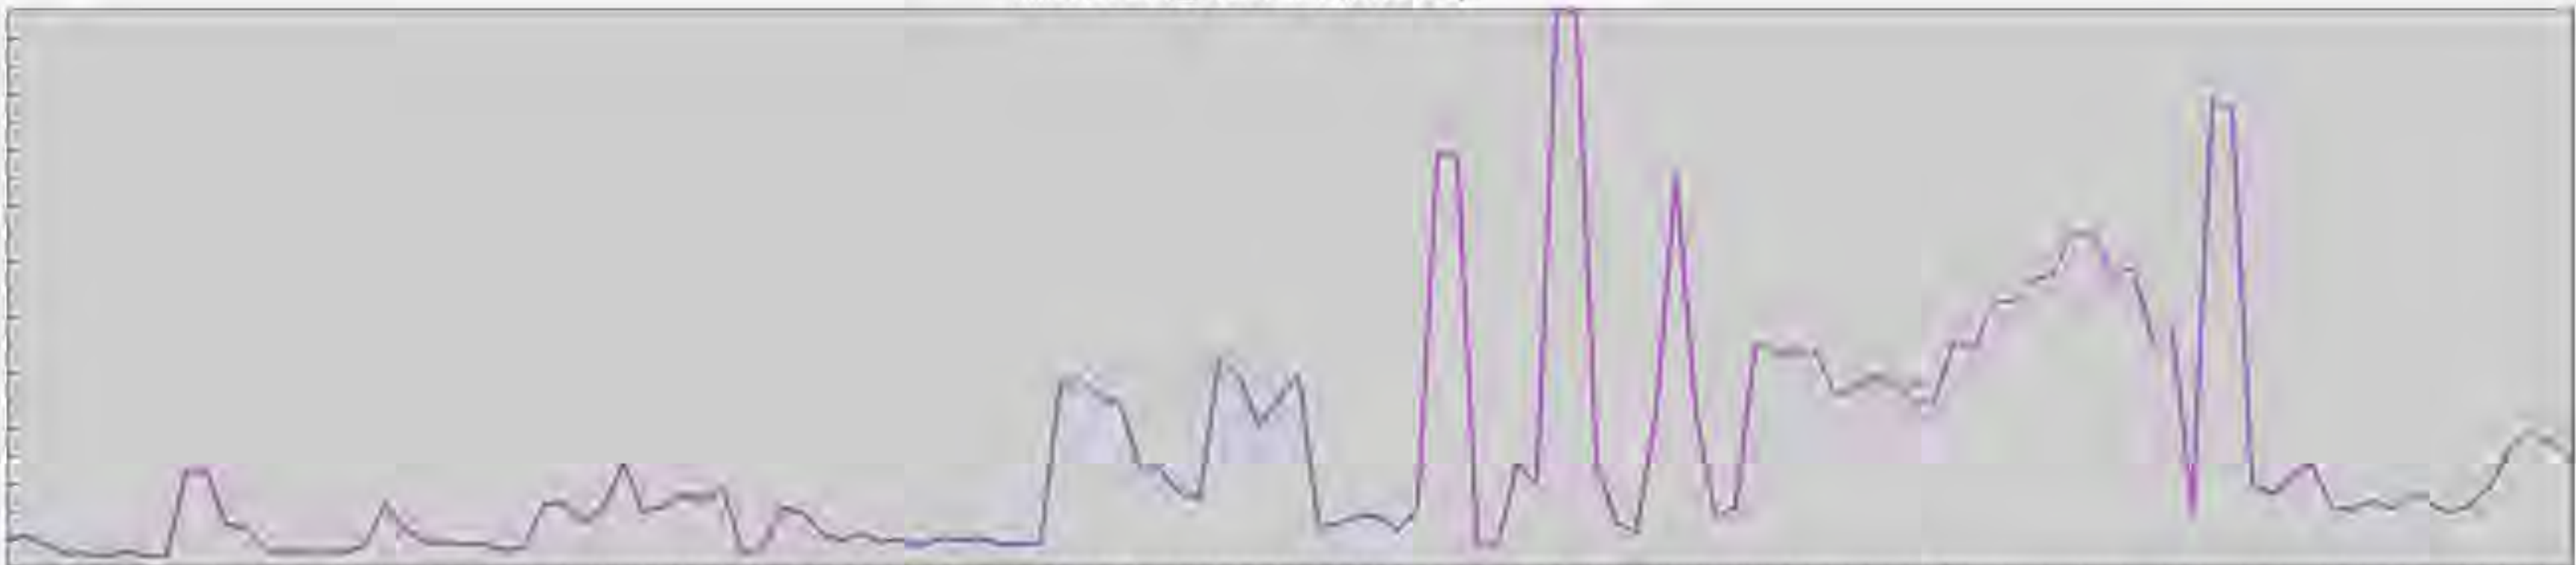

130- NALT GSM289411 CEL  
129- NALT GSM289410 CEL  
128- NALT GSM289409 CEL  
127- NALT GSM289408 CEL  
126- Colon-d9 GSM1988105 CEL  
125- Colon-d9 GSM1988104 CEL  
124- Colon-d9 GSM1988103 CEL  
123- Colon-d4 GSM1988102 CEL  
122- Colon-d4 GSM1988101 CEL  
121- Intestine-large GSM258676 CEL  
120- Intestine-large GSM258675 CEL  
119- Intestine-small GSM258674 CEL  
118- Intestine-small GSM258673 CEL  
117- Lymph-nodes GSM258672 CEL  
116- Lymph-nodes GSM258671 CEL  
115- Spleen GSM258767 CEL  
114- Spleen GSM258766 CEL  
113- Neuro2a GSM258729 CEL  
112- Neuro2a GSM258728 CEL  
111- Astrocytes GSM241898 CEL  
110- mimg GSM258726 CEL  
109- mimg GSM258725 CEL  
108- MIMCD3 GSM258724 CEL  
107- MIMCD3 GSM258723 CEL  
106- Bruce4 GSM258656 CEL  
105- Bruce4 GSM258655 CEL  
104- C2C12 GSM258690 CEL  
103- C2C12 GSM258689 CEL  
102- NIH3T3 GSM258739 CEL  
101- NIH3T3 GSM258738 CEL  
100- 3T3-L1 GSM258610 CEL  
99- 3T3-L1 GSM258609 CEL  
98- 10T12 GSM258631 CEL  
97- 10T12 GSM258630 CEL  
96- Osteoblast-d21 GSM258740 CEL  
95- Osteoblast-d21 GSM258739 CEL  
94- Osteoblast-d14 GSM258738 CEL  
93- Osteoblast-d14 GSM258737 CEL  
92- Osteoblast-d5 GSM258742 CEL  
91- Osteoblast-d5 GSM258741 CEL  
90- Chondrocytes GSM266741 CEL  
89- Chondrocytes GSM266740 CEL  
88- Nat Helper cell GSM465594 CEL  
87- Nat Helper cell GSM465593 CEL  
86- Tt cell GSM465596 CEL  
85- MS-1 GSM234692 CEL  
84- Lymph-endo-cells GSM143704 CEL  
83- PP-FDC GSM481977 CEL  
82- PP-FDC GSM481978 CEL  
81- PP-FDC GSM481976 CEL  
80- FLY RMLNDCC003001 CEL  
79- FLY RMLNDCC003001 CEL  
78- Follicular-Bcells GSM258664 CEL  
77- Follicular-Bcells GSM258663 CEL  
76- MZ-Bcell GSM258622 CEL  
75- MZ-Bcell GSM258621 CEL  
74- BAF3 GSM258620 CEL  
73- BAF3 GSM258619 CEL  
72- Tregs GSM258778 CEL  
71- Tregs GSM258777 CEL  
70- T-cells-CD8+ GSM258776 CEL  
69- T-cells-CD8+ GSM258775 CEL  
68- T-cells-CD4+ GSM258774 CEL  
67- T-cells-CD4+ GSM258773 CEL  
66- Thymocyte-DN GSM465595 CEL  
65- Osteoclasts GSM258743 CEL  
64- Microglia GSM258721 CEL  
63- Microglia GSM258721 CEL  
62- PMM-PS-7h GSM258706 CEL  
61- PMM-PS-7h GSM258705 CEL  
60- PMM-PS-6h GSM258702 CEL  
59- PMM-PS-6h GSM258701 CEL  
58- BMM-LPS-6h GSM258699 CEL  
57- BMM-LPS-6h GSM258699 CEL  
56- BMM-LPS-6h GSM258694 CEL  
55- BMM-LPS-6h GSM258694 CEL  
54- BMM-LPS-6h GSM258694 CEL  
53- Plasmacytoid-DC GSM258650 CEL  
52- Plasmacytoid-DC GSM258649 CEL  
51- CD8a-DC GSM258648 CEL  
50- CD8a-DC GSM258647 CEL  
49- CD8a+DC GSM258646 CEL  
48- CD8a+DC GSM258645 CEL  
47- NK-cells GSM258732 CEL  
46- NK-cells GSM258731 CEL  
45- Mast-cells-IgE+Ad GSM258718 CEL  
44- Mast-cells-IgE+Ad GSM258717 CEL  
43- Mast-cells-IgE GSM258714 CEL  
42- Mast-cells-IgE GSM258713 CEL  
41- Mast-cells GSM258712 CEL  
40- Granulocytes GSM258668 CEL  
39- Granulocytes GSM258667 CEL  
38- GMP GSM258666 CEL  
37- GMP GSM258665 CEL  
36- GMP GSM258665 CEL  
35- CMP GSM258642 CEL  
34- CMP GSM258641 CEL  
33- MIEP GSM258720 CEL  
32- MIEP GSM258719 CEL  
31- HESC GSM258770 CEL  
30- HESC GSM258769 CEL  
29- Bone marrow GSM258628 CEL  
28- Bone marrow GSM258627 CEL  
27- Paneth-cells-GF-1 GSM116357 CEL  
26- Paneth-cells-GF-1 GSM116357 CEL  
25- Paneth-cells GSM116350 CEL  
24- Paneth-cells GSM116359 CEL  
23- Paneth-cells GSM318589 CEL  
22- Paneth-cells GSM318590 CEL  
21- Colon-Crypt GSM480375 cel  
20- Colon-Crypt GSM480374 cel  
19- Colon-Vill GSM480363 cel  
18- Colon-Vill GSM480362 cel  
17- Colon-IEC-GF GSM349880 CEL  
16- Colon-IEC-GF GSM350375 CEL  
15- Ileum-IEC-GF GSM350376 CEL  
14- Ileum-IEC GSM350371 CEL  
13- Small-intestine-epithelium RMINEP002001 CEL  
12- Small-intestine-epithelium RMINEP001001 CEL  
11- FAE RMPYEP002001 CEL  
10- FAE RMPYEP001001 CEL  
09- Ileum-IEC GSM190797 CEL  
08- Ileum-IEC GSM190796 CEL  
07- Ileum-IEC GSM190795 CEL  
06- CT-v-M-cells GSM190794 CEL  
05- CT-v-M-cells GSM190793 CEL  
04- CT-v-M-cells GSM190792 CEL  
03- PP-M-cells GSM190791 CEL  
02- PP-M-cells GSM190790 CEL  
01- PP-M-cells GSM190789 CEL



Cluster0338\_Intestine-related (7 nodes)

2,034.8  
1,927.7  
1,820.7  
1,713.6  
1,606.5  
1,499.4  
1,392.3  
1,285.2  
1,178.1  
1,071  
963.9  
856.8  
749.7  
642.6  
535.5  
428.4  
321.3  
214.2  
107.1  
0

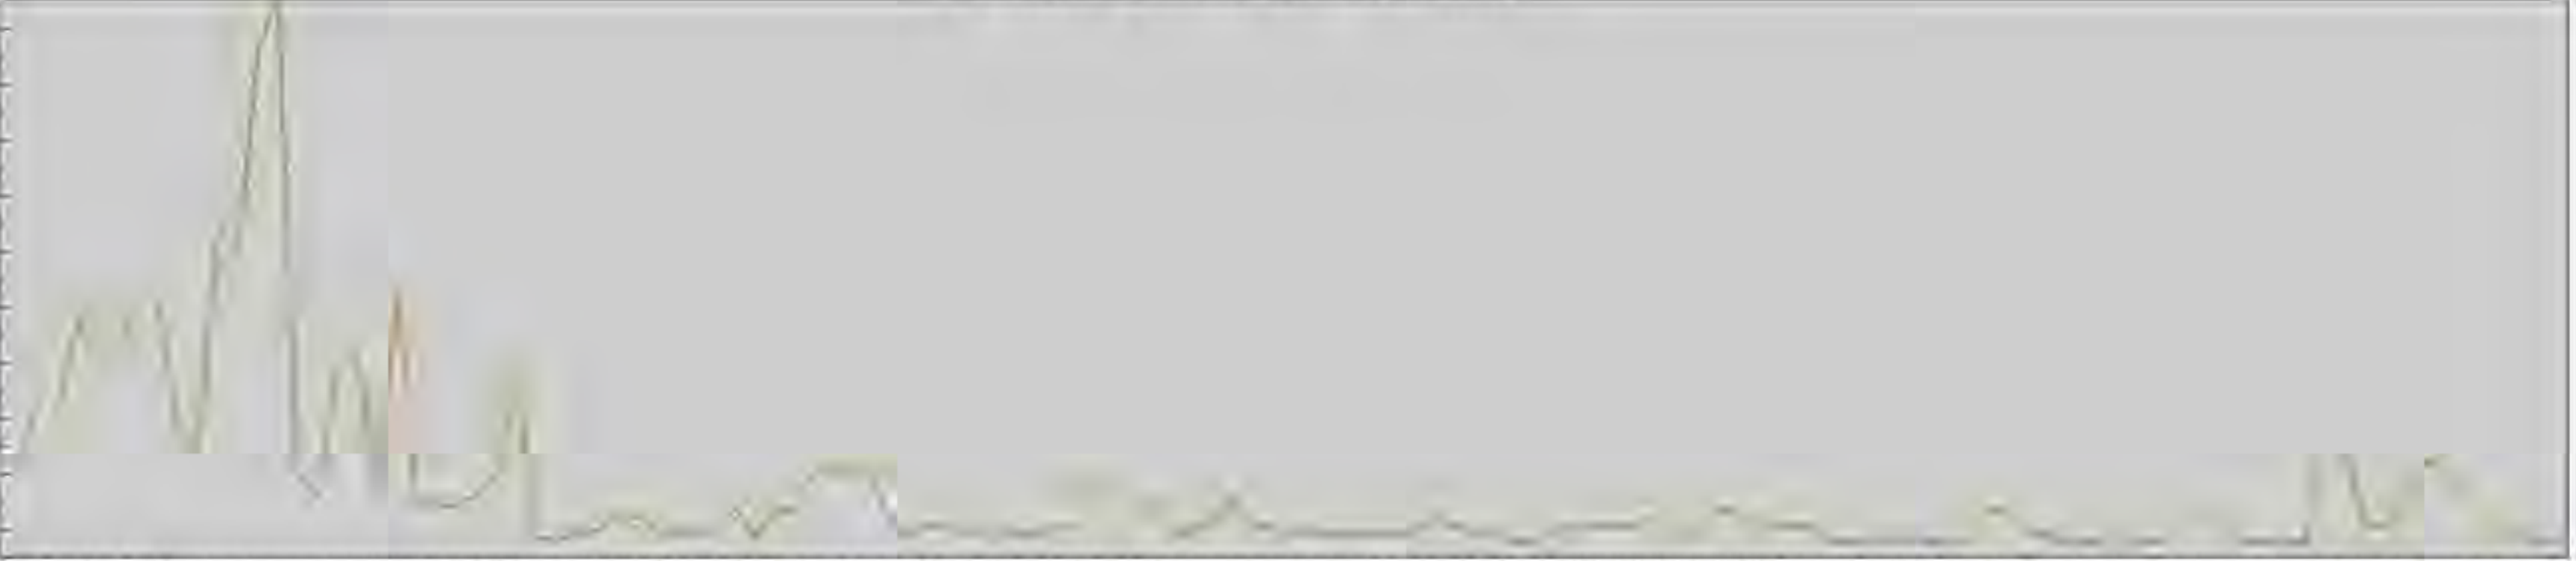

130- NALT GSM289411 CELL  
 129- NALT GSM289410 CELL  
 128- NALT GSM289409 CELL  
 127- NALT GSM289408 CELL  
 126- Colon-d9 GSM1988105 CELL  
 125- Colon-d9 GSM1988104 CELL  
 124- Colon-d9 GSM1988103 CELL  
 123- Colon-d4 GSM1988102 CELL  
 122- Colon-d4 GSM1988101 CELL  
 121- Intestine-large GSM258676 CELL  
 120- Intestine-large GSM258675 CELL  
 119- Intestine-small GSM258674 CELL  
 118- Intestine-small GSM258673 CELL  
 117- Lymph-nodes GSM258672 CELL  
 116- Lymph-nodes GSM258671 CELL  
 115- Spleen GSM258767 CELL  
 114- Spleen GSM258766 CELL  
 113- Neuro2a GSM258728 CELL  
 112- Neuro2a GSM258727 CELL  
 111- Astrocytes GSM241898 CELL  
 110- mimb GSM258726 CELL  
 109- mimb GSM258725 CELL  
 108- MIMCD3 GSM258724 CELL  
 107- MIMCD3 GSM258723 CELL  
 106- Bruce4 GSM258665 CELL  
 105- Bruce4 GSM258664 CELL  
 104- C2C12 GSM258690 CELL  
 103- C2C12 GSM258689 CELL  
 102- NIH3T3 GSM258730 CELL  
 101- NIH3T3 GSM258729 CELL  
 100- 3T3-L1 GSM258610 CELL  
 99- 3T3-L1 GSM258609 CELL  
 98- 10T12 GSM258632 CELL  
 97- 10T12 GSM258631 CELL  
 96- Osteoblast-d21 GSM258740 CELL  
 95- Osteoblast-d21 GSM258739 CELL  
 94- Osteoblast-d14 GSM258738 CELL  
 93- Osteoblast-d14 GSM258737 CELL  
 92- Osteoblast-d5 GSM258742 CELL  
 91- Osteoblast-d5 GSM258741 CELL  
 90- Chondrocytes GSM266741 CELL  
 89- Nat Helper cell GSM465594 CELL  
 88- Nat Helper cell GSM465593 CELL  
 87- T cell GSM465596 CELL  
 86- MS-1 GSM234692 CELL  
 85- Lymph-endo-cells GSM143704 CELL  
 84- P-PDC GSM481977 CELL  
 83- P-PDC GSM481978 CELL  
 82- P-PDC GSM481976 CELL  
 81- F-LY RMLNDCC003001 CELL  
 80- F-LY RMLNDCC003001 CELL  
 79- F-LY RMLNDCC003001 CELL  
 78- Follicular-Bcells GSM258664 CELL  
 77- Follicular-Bcells GSM258663 CELL  
 76- MZ-Bcell GSM258627 CELL  
 75- MZ-Bcell GSM258621 CELL  
 74- BAF3 GSM258620 CELL  
 73- BAF3 GSM258619 CELL  
 72- Tregs GSM258778 CELL  
 71- Tregs GSM258777 CELL  
 70- T-cells-CD8+ GSM258776 CELL  
 69- T-cells-CD8+ GSM258774 CELL  
 68- T-cells-CD4+ GSM258773 CELL  
 67- T-cells-CD4+ GSM258744 CELL  
 66- Thymocyte-DN GSM465595 CELL  
 65- Osteoclasts GSM258743 CELL  
 64- Microglia GSM258721 CELL  
 63- Microglia GSM258721 CELL  
 62- P-MM-LPS-7h GSM268706 CELL  
 61- P-MM-LPS-7h GSM268705 CELL  
 60- P-MM-LPS-6h GSM258702 CELL  
 59- P-MM-LPS-6h GSM258701 CELL  
 58- BMM-LPS-6h GSM268699 CELL  
 57- BMM-LPS-6h GSM268699 CELL  
 56- BMM-LPS-6h GSM258694 CELL  
 55- BMM-LPS-6h GSM258694 CELL  
 54- Pasmacryoid-DC GSM258650 CELL  
 53- Pasmacryoid-DC GSM258649 CELL  
 52- CD8a-DC GSM258647 CELL  
 51- CD8a-DC GSM258647 CELL  
 50- CD8a+DC GSM258646 CELL  
 49- CD8a+DC GSM258646 CELL  
 48- NK-cells GSM258732 CELL  
 47- NK-cells GSM258731 CELL  
 46- Mast-cells-IgE+Ad GSM258719 CELL  
 45- Mast-cells-IgE+Ad GSM258718 CELL  
 44- Mast-cells-IgE GSM258714 CELL  
 43- Mast-cells-IgE GSM258713 CELL  
 42- Mast-cells-IgE GSM258712 CELL  
 41- Mast-cells GSM258711 CELL  
 40- Granulocytes GSM258668 CELL  
 39- Granulocytes GSM258667 CELL  
 38- GMP GSM258666 CELL  
 37- GMP GSM258665 CELL  
 36- GMP GSM258664 CELL  
 35- CMP GSM258642 CELL  
 34- CMP GSM258641 CELL  
 33- MIEP GSM258720 CELL  
 32- MIEP GSM258719 CELL  
 31- HESC GSM258770 CELL  
 30- HESC GSM258769 CELL  
 29- Bone marrow GSM258628 CELL  
 28- Bone marrow GSM258627 CELL  
 27- Paneth-cells-GF-1 GSM116357 CELL  
 26- Paneth-cells-GF-1 GSM116356 CELL  
 25- Paneth-cells GSM116350 CELL  
 24- Paneth-cells GSM116359 CELL  
 23- Paneth-cells GSM318589 CELL  
 22- Paneth-cells GSM318590 CELL  
 21- Colon-Crypt GSM480375 CELL  
 20- Colon-Crypt GSM480374 CELL  
 19- Colon-Vill GSM480363 CELL  
 18- Colon-Vill GSM480362 CELL  
 17- Colon-IEC-GF GSM349880 CELL  
 16- Colon-IEC-GF GSM350375 CELL  
 15- Ileum-IEC-GF GSM350376 CELL  
 14- Ileum-IEC GSM350371 CELL  
 13- Small-intestine-epithelium RMINEP002001 CELL  
 12- Small-intestine-epithelium RMINEP001001 CELL  
 11- FAE-RMPYEP002001 CELL  
 10- FAE-RMPYEP001001 CELL  
 09- Ileum-IEC GSM190797 CELL  
 08- Ileum-IEC GSM190796 CELL  
 07- Ileum-IEC GSM190795 CELL  
 06- CT-v-M-cells GSM190794 CELL  
 05- CT-v-M-cells GSM190793 CELL  
 04- CT-v-M-cells GSM190792 CELL  
 03- PP-M-cells GSM190791 CELL  
 02- PP-M-cells GSM190790 CELL  
 01- PP-M-cells GSM190789 CELL



Cluster0339\_House keeping (7 nodes)

2,588.8  
2,452.5  
2,316.3  
2,180  
2,043.8  
1,907.5  
1,771.3  
1,635  
1,498.8  
1,362.5  
1,226.3  
1,090  
953.8  
817.5  
681.3  
545  
408.8  
272.5  
136.3  
0

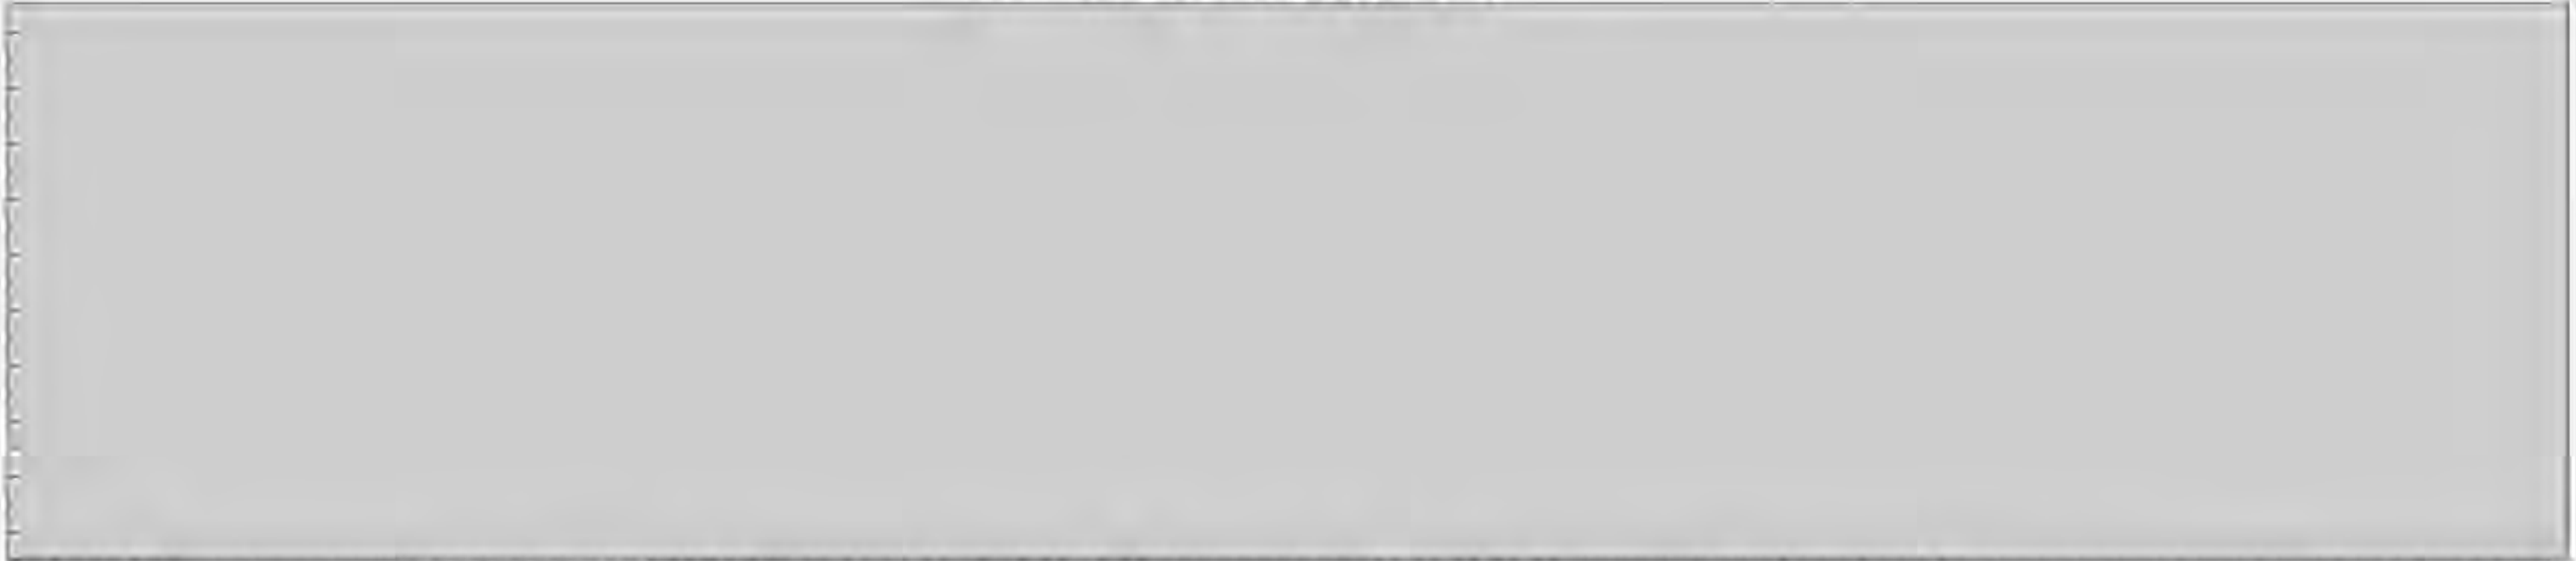

30- NALT GSM2899411 CELL  
 29- NALT GSM2899410 CELL  
 28- NALT GSM2899409 CELL  
 27- NALT GSM2899408 CELL  
 26- Colon-d9 GSM1988104 CELL  
 25- Colon-d9 GSM1988103 CELL  
 24- Colon-d4 GSM1988102 CELL  
 23- Colon-d4 GSM1988101 CELL  
 22- Colon-d4 GSM1988100 CELL  
 21- Intestine-large GSM2586776 CELL  
 20- Intestine-large GSM2586775 CELL  
 19- Intestine-small GSM2586774 CELL  
 18- Intestine-small GSM2586773 CELL  
 17- Lymph-nodes GSM2586772 CELL  
 16- Spleen GSM2586771 CELL  
 15- Spleen GSM2586770 CELL  
 14- Neuro2a GSM2418998 CELL  
 13- Astrocytes GSM2418997 CELL  
 12- mimb GSM2586770 CELL  
 11- mimb GSM2586771 CELL  
 10- mimb GSM2586772 CELL  
 09- mimb GSM2586773 CELL  
 08- MIMCD3 GSM2586774 CELL  
 07- MIMCD3 GSM2586775 CELL  
 06- Bruce4 GSM2586776 CELL  
 05- Bruce4 GSM2586777 CELL  
 04- C2C12 GSM2586778 CELL  
 03- C2C12 GSM2586779 CELL  
 02- NH3T3 GSM2586780 CELL  
 01- NH3T3 GSM2586781 CELL  
 99- 3T3-L1 GSM2586782 CELL  
 98- 3T3-L1 GSM2586783 CELL  
 97- 10T12 GSM2586784 CELL  
 96- Osteoblast-d21 GSM2586785 CELL  
 95- Osteoblast-d14 GSM2586786 CELL  
 94- Osteoblast-d14 GSM2586787 CELL  
 93- Osteoblast-d5 GSM2586788 CELL  
 92- Osteoblast-d5 GSM2586789 CELL  
 91- Osteoblast-d5 GSM2586790 CELL  
 90- Chondrocytes GSM2586791 CELL  
 89- Nat Helper cell GSM465594 CELL  
 88- Nat Helper cell GSM465593 CELL  
 87- T cell GSM465592 CELL  
 86- T cell GSM465591 CELL  
 85- MS-1 GSM234692 CELL  
 84- Lymph-endo-cells GSM143704 CELL  
 83- P-FDC GSM481977 CELL  
 82- P-FDC GSM481978 CELL  
 81- P-FDC GSM481979 CELL  
 80- F-LY RMLNDCC002001 CELL  
 79- F-LY RMLNDCC002001 CELL  
 78- Follicular-Bcells GSM258664 CELL  
 77- Follicular-Bcells GSM258665 CELL  
 76- MZ-Bcell GSM258666 CELL  
 75- MZ-Bcell GSM258667 CELL  
 74- BAF3 GSM258668 CELL  
 73- BAF3 GSM258669 CELL  
 72- Tregs GSM258670 CELL  
 71- Tregs GSM258671 CELL  
 70- T-cells-CD8+ GSM258672 CELL  
 69- T-cells-CD8+ GSM258673 CELL  
 68- T-cells-CD4+ GSM258674 CELL  
 67- T-cells-CD4+ GSM258675 CELL  
 66- Thymocyte-DN GSM465595 CELL  
 65- Osteoclasts GSM258676 CELL  
 64- Microglia GSM258677 CELL  
 63- Microglia GSM258678 CELL  
 62- MM-LPS-7h GSM258679 CELL  
 61- MM-LPS-7h GSM258680 CELL  
 60- MM-LPS-6h GSM258681 CELL  
 59- MM-LPS-6h GSM258682 CELL  
 58- MM-LPS-6h GSM258683 CELL  
 57- MM-LPS-6h GSM258684 CELL  
 56- MM-LPS-6h GSM258685 CELL  
 55- MM-LPS-6h GSM258686 CELL  
 54- MM-LPS-6h GSM258687 CELL  
 53- MM-LPS-6h GSM258688 CELL  
 52- MM-LPS-6h GSM258689 CELL  
 51- MM-LPS-6h GSM258690 CELL  
 50- MM-LPS-6h GSM258691 CELL  
 49- MM-LPS-6h GSM258692 CELL  
 48- CD8a+DC GSM258693 CELL  
 47- NK-cells GSM258694 CELL  
 46- NK-cells GSM258695 CELL  
 45- Mast-cells-IgE+Ad GSM258696 CELL  
 44- Mast-cells-IgE+Ad GSM258697 CELL  
 43- Mast-cells-IgE GSM258698 CELL  
 42- Mast-cells-IgE GSM258699 CELL  
 41- Mast-cells-IgE GSM258700 CELL  
 40- Mast-cells-IgE GSM258701 CELL  
 39- Granulocytes GSM258702 CELL  
 38- Granulocytes GSM258703 CELL  
 37- GMP GSM258704 CELL  
 36- GMP GSM258705 CELL  
 35- GMP GSM258706 CELL  
 34- GMP GSM258707 CELL  
 33- MUEP GSM258708 CELL  
 32- MUEP GSM258709 CELL  
 31- HESC GSM258710 CELL  
 30- HESC GSM258711 CELL  
 29- Bone marrow GSM258712 CELL  
 28- Bone marrow GSM258713 CELL  
 27- Paneth-cells-GF-1 GSM116357 CELL  
 26- Paneth-cells-GF-1 GSM116358 CELL  
 25- Paneth-cells-GF-1 GSM116359 CELL  
 24- Paneth-cells-GF-1 GSM116360 CELL  
 23- Paneth-cells-GF-1 GSM116361 CELL  
 22- Paneth-cells-GF-1 GSM116362 CELL  
 21- Paneth-cells-GF-1 GSM116363 CELL  
 20- Paneth-cells-GF-1 GSM116364 CELL  
 19- Paneth-cells-GF-1 GSM116365 CELL  
 18- Paneth-cells-GF-1 GSM116366 CELL  
 17- Paneth-cells-GF-1 GSM116367 CELL  
 16- Paneth-cells-GF-1 GSM116368 CELL  
 15- Paneth-cells-GF-1 GSM116369 CELL  
 14- Paneth-cells-GF-1 GSM116370 CELL  
 13- Paneth-cells-GF-1 GSM116371 CELL  
 12- Paneth-cells-GF-1 GSM116372 CELL  
 11- Paneth-cells-GF-1 GSM116373 CELL  
 10- Paneth-cells-GF-1 GSM116374 CELL  
 09- Paneth-cells-GF-1 GSM116375 CELL  
 08- Paneth-cells-GF-1 GSM116376 CELL  
 07- Paneth-cells-GF-1 GSM116377 CELL  
 06- Paneth-cells-GF-1 GSM116378 CELL  
 05- Paneth-cells-GF-1 GSM116379 CELL  
 04- Paneth-cells-GF-1 GSM116380 CELL  
 03- Paneth-cells-GF-1 GSM116381 CELL  
 02- Paneth-cells-GF-1 GSM116382 CELL  
 01- Paneth-cells-GF-1 GSM116383 CELL



### Cluster0340\_Phagocyte-related (7 nodes)

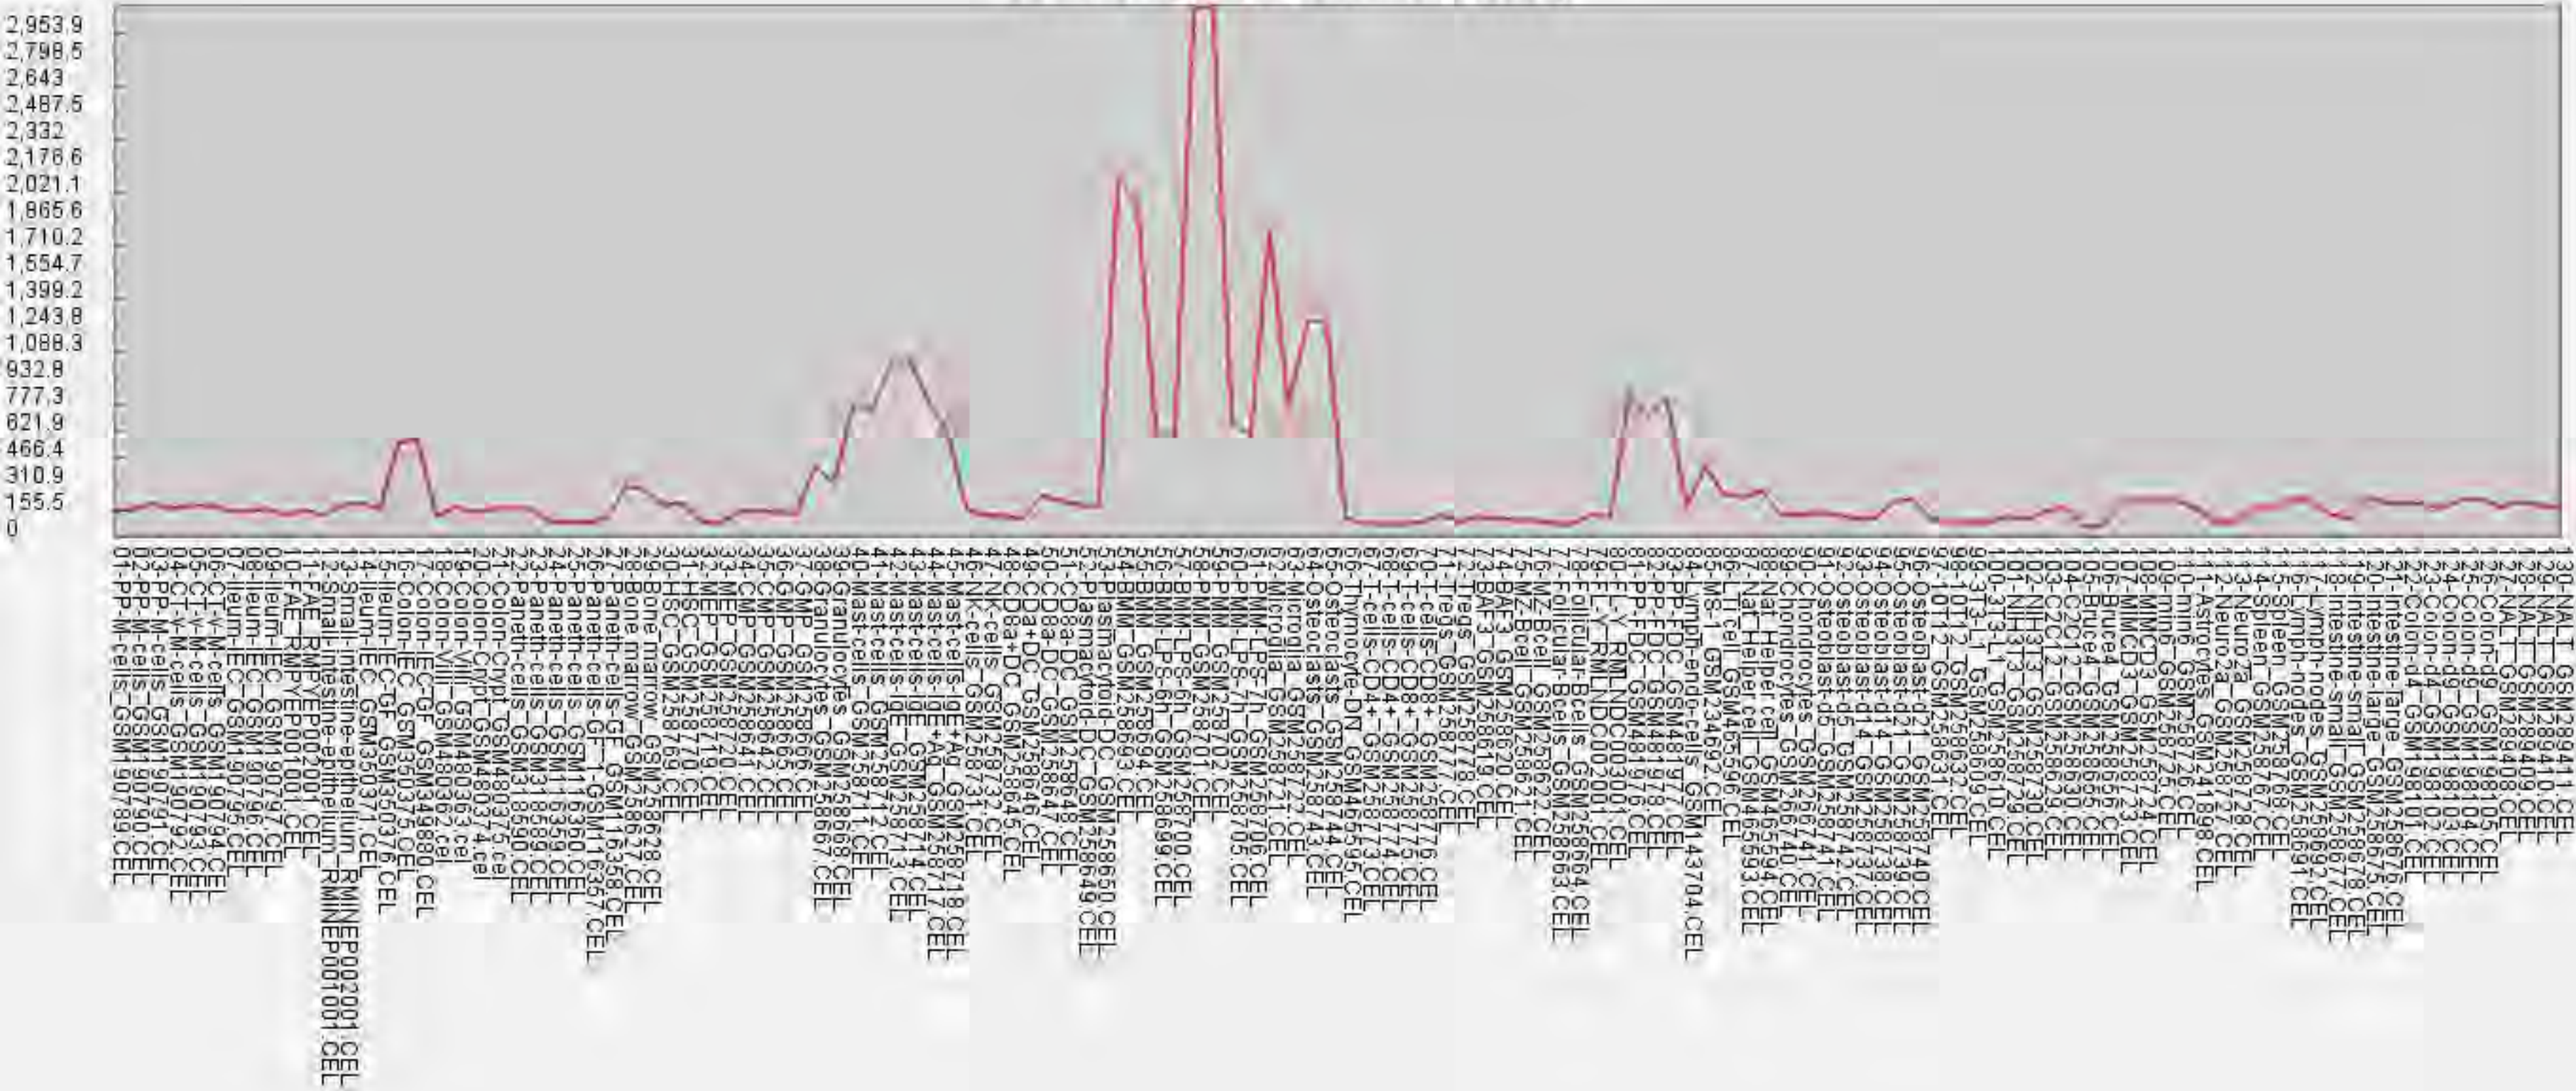



Cluster0341\_Mesenchyme-related/extracellular matrix (7 nodes)

765.2  
724.9  
684.7  
644.4  
604.1  
563.8  
523.6  
483.3  
443  
402.7  
362.5  
322.2  
281.9  
241.6  
201.4  
161.1  
120.8  
80.5  
40.3  
0

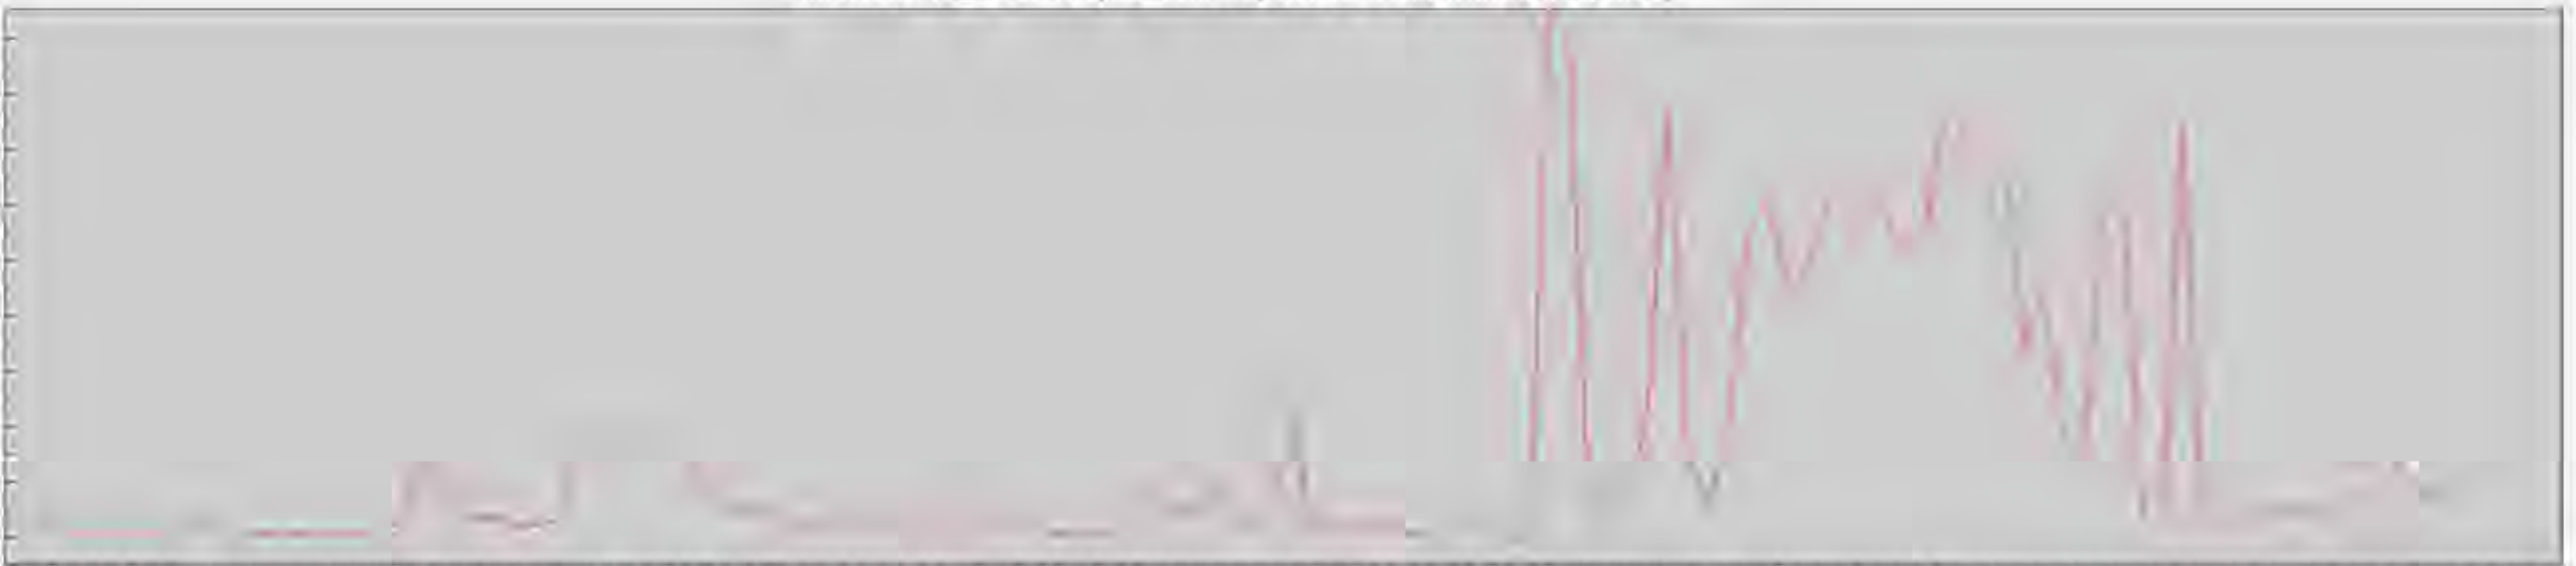

130-NALT GSM289411 CELL  
129-NALT GSM289410 CELL  
128-NALT GSM289409 CELL  
127-NALT GSM289408 CELL  
126-Column-d9 GSM1988105 CELL  
125-Column-d9 GSM1988104 CELL  
124-Column-d9 GSM1988103 CELL  
123-Column-d4 GSM1988102 CELL  
122-Column-d4 GSM1988101 CELL  
121-Intestine-large GSM258676 CELL  
120-Intestine-large GSM258675 CELL  
119-Intestine-small GSM258678 CELL  
118-Intestine-small GSM258679 CELL  
117-Lymph-nodes GSM258691 CELL  
116-Lymph-nodes GSM258726 CELL  
115-Spleen GSM258766 CELL  
114-Spleen GSM258767 CELL  
113-Neuro2a GSM258728 CELL  
112-Neuro2a GSM258727 CELL  
111-Astrocytes GSM241898 CELL  
110-ming GSM258726 CELL  
109-ming GSM258725 CELL  
108-MIMCD3 GSM258724 CELL  
107-MIMCD3 GSM258723 CELL  
106-Bruce4 GSM258656 CELL  
105-Bruce4 GSM258655 CELL  
104-C2C12 GSM258690 CELL  
103-C2C12 GSM258689 CELL  
102-NH3T3 GSM258730 CELL  
101-NH3T3 GSM258729 CELL  
100-3T3-L1 GSM258610 CELL  
99-3T3-L1 GSM258609 CELL  
98-10T12 GSM258632 CELL  
97-10T12 GSM258631 CELL  
96-Osteoblast-d21 GSM258740 CELL  
95-Osteoblast-d21 GSM258739 CELL  
94-Osteoblast-d14 GSM258738 CELL  
93-Osteoblast-d14 GSM258737 CELL  
92-Osteoblast-d5 GSM258742 CELL  
91-Osteoblast-d5 GSM258741 CELL  
90-Chondrocytes GSM266741 CELL  
89-Chondrocytes GSM266740 CELL  
88-Nat Helper cell GSM465594 CELL  
87-Nat Helper cell GSM465593 CELL  
86-LT cell GSM465596 CELL  
85-MS-1 GSM234692 CELL  
84-Lymph-endo-cells GSM143704 CELL  
83-P-FDC GSM481977 CELL  
82-P-FDC GSM481978 CELL  
81-P-FDC GSM481976 CELL  
80-LY RMLNDCC003001 CELL  
79-LY RMLNDCC003001 CELL  
78-Follicular-Bcells GSM258664 CELL  
77-Follicular-Bcells GSM258665 CELL  
76-MZ-Bcell GSM258627 CELL  
75-MZ-Bcell GSM258627 CELL  
74-BAF3 GSM258620 CELL  
73-BAF3 GSM258619 CELL  
72-Tregs GSM258778 CELL  
71-Tregs GSM258777 CELL  
70-T-cells-CD8+ GSM258776 CELL  
69-T-cells-CD8+ GSM258774 CELL  
68-T-cells-CD4+ GSM258773 CELL  
67-T-cells-CD4+ GSM258773 CELL  
66-Thymocyte-DN GSM465595 CELL  
65-Osteoclasts GSM258743 CELL  
64-Osteoclasts GSM258743 CELL  
63-Microglia GSM258721 CELL  
62-Microglia GSM258721 CELL  
61-PM-M-PS-7h GSM268706 CELL  
60-PM-M-PS-7h GSM268705 CELL  
59-PM-M-PS-6h GSM258702 CELL  
58-PM-M-PS-6h GSM258701 CELL  
57-BMM-LPS-6h GSM268699 CELL  
56-BMM-LPS-6h GSM268699 CELL  
55-BMM-LPS-6h GSM268699 CELL  
54-BMM-LPS-6h GSM268699 CELL  
53-Plasmacytoid-DC GSM258650 CELL  
52-Plasmacytoid-DC GSM258649 CELL  
51-CD8a-DC GSM258648 CELL  
50-CD8a-DC GSM258647 CELL  
49-CD8a+DC GSM258646 CELL  
48-CD8a+DC GSM258645 CELL  
47-NK-cells GSM258732 CELL  
46-NK-cells GSM258731 CELL  
45-Mast-cells-IgE+Ad GSM258718 CELL  
44-Mast-cells-IgE+Ad GSM258717 CELL  
43-Mast-cells-IgE GSM258714 CELL  
42-Mast-cells-IgE GSM258713 CELL  
41-Mast-cells GSM258712 CELL  
40-Granulocytes GSM258711 CELL  
39-Granulocytes GSM258667 CELL  
38-Granulocytes GSM258666 CELL  
37-GMP GSM258665 CELL  
36-GMP GSM258664 CELL  
35-GMP GSM258642 CELL  
34-MEP GSM258641 CELL  
33-MEP GSM258720 CELL  
32-MEP GSM258719 CELL  
31-HSC GSM258770 CELL  
30-HSC GSM258769 CELL  
29-Bone marrow GSM258628 CELL  
28-Bone marrow GSM258627 CELL  
27-paneth-cells-GE GSM116358 CELL  
26-paneth-cells-GE GSM116357 CELL  
25-paneth-cells GSM116350 CELL  
24-paneth-cells GSM116359 CELL  
23-paneth-cells GSM318589 CELL  
22-paneth-cells GSM318590 CELL  
21-Column-crypt GSM480375 CELL  
20-Column-crypt GSM480374 CELL  
19-Column-Vill GSM480363 CELL  
18-Column-Vill GSM480362 CELL  
17-Column-IEC-Gf GSM349880 CELL  
16-Column-IEC-Gf GSM350375 CELL  
15-Ileum-IEC-Gf GSM350376 CELL  
14-Ileum-IEC GSM350371 CELL  
13-Small-intestine-epithelium RMINEP002001 CELL  
12-Small-intestine-epithelium RMINEP001001 CELL  
11-FAE-RMPYEP002001 CELL  
10-FAE-RMPYEP001001 CELL  
9-Ileum-IEC GSM190797 CELL  
8-Ileum-IEC GSM190796 CELL  
7-Ileum-IEC GSM190795 CELL  
6-CT-v-M-cells GSM190794 CELL  
5-CT-v-M-cells GSM190793 CELL  
4-CT-v-M-cells GSM190792 CELL  
3-PP-M-cells GSM190791 CELL  
2-PP-M-cells GSM190790 CELL  
1-PP-M-cells GSM190789 CELL



Cluster0342\_Uncertain-low in many (7 nodes)

139.3  
131.9  
124.6  
117.3  
110  
102.6  
95.3  
88  
80.6  
73.3  
66  
58.6  
51.3  
44  
36.7  
29.3  
22  
14.7  
7.3  
0

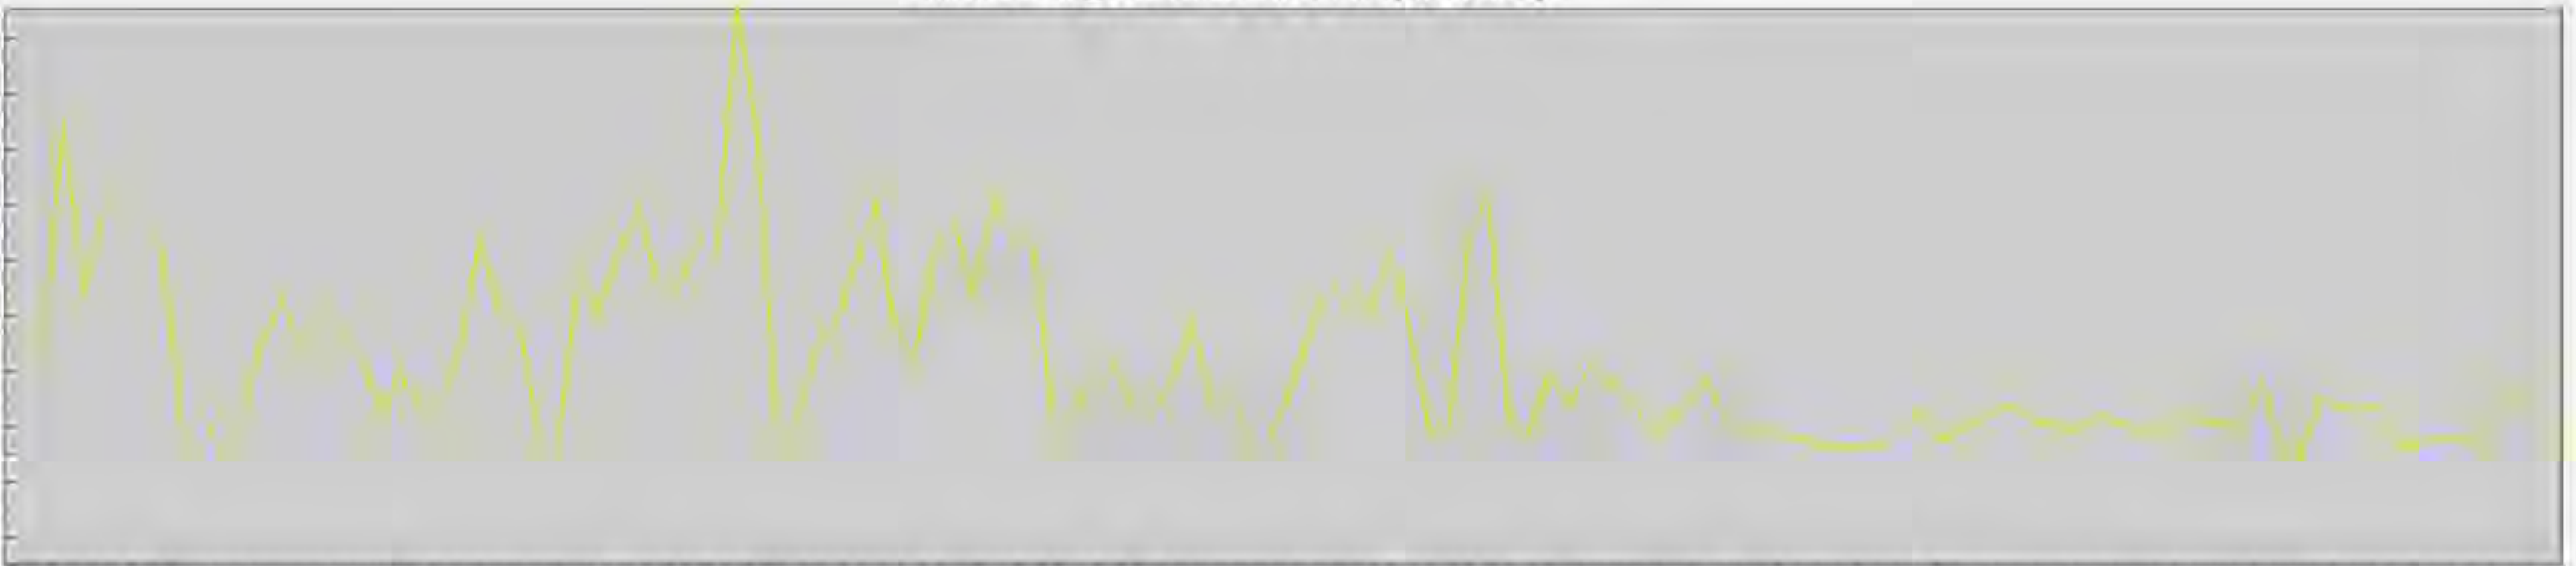

130-NALT GSM289411.CEL  
129-NALT GSM289410.CEL  
128-NALT GSM289409.CEL  
127-NALT GSM289408.CEL  
126-Colon-d9 GSM1988105.CEL  
125-Colon-d9 GSM1988104.CEL  
124-Colon-d9 GSM1988103.CEL  
123-Colon-d4 GSM1988102.CEL  
122-Colon-d4 GSM1988101.CEL  
121-Intestine-large GSM258676.CEL  
120-Intestine-large GSM258675.CEL  
119-Intestine-small GSM258678.CEL  
118-Intestine-small GSM258677.CEL  
117-Lymph-nodes GSM258691.CEL  
116-Lymph-nodes GSM258692.CEL  
115-Spleen GSM258767.CEL  
114-Spleen GSM258767.CEL  
113-Neuro2a GSM258729.CEL  
112-Neuro2a GSM258729.CEL  
111-Astrocytes GSM241898.CEL  
110-mim6 GSM258726.CEL  
109-mim6 GSM258725.CEL  
108-MIMCD3 GSM258724.CEL  
107-MIMCD3 GSM258723.CEL  
106-Bruce4 GSM258656.CEL  
105-Bruce4 GSM258656.CEL  
104-C2C12 GSM258690.CEL  
103-C2C12 GSM258629.CEL  
102-NH3T3 GSM258739.CEL  
101-NH3T3 GSM258739.CEL  
100-3T3-L1 GSM258610.CEL  
99-3T3-L1 GSM258609.CEL  
98-10T12 GSM258632.CEL  
97-10T12 GSM258631.CEL  
96-Osteoblast-d21 GSM258740.CEL  
95-Osteoblast-d21 GSM258739.CEL  
94-Osteoblast-d14 GSM258738.CEL  
93-Osteoblast-d14 GSM258737.CEL  
92-Osteoblast-d5 GSM258742.CEL  
91-Osteoblast-d5 GSM258741.CEL  
90-Chondrocytes GSM266741.CEL  
89-Chondrocytes GSM266740.CEL  
88-Nat Helper cell GSM465594.CEL  
87-Nat Helper cell GSM465593.CEL  
86-LT cell GSM465596.CEL  
85-MS-1 GSM234692.CEL  
84-Lymph-endo-cells GSM143704.CEL  
83-PP-FDC GSM481977.CEL  
82-PP-FDC GSM481978.CEL  
81-PP-FDC GSM481976.CEL  
80-LY RMLNDC003001.CEL  
79-LY RMLNDC003001.CEL  
78-Follicular-Bcells GSM258664.CEL  
77-Follicular-Bcells GSM258663.CEL  
76-MZ-Bcell GSM258622.CEL  
75-MZ-Bcell GSM258621.CEL  
74-BAF3 GSM258620.CEL  
73-BAF3 GSM258619.CEL  
72-Tregs GSM258778.CEL  
71-Tregs GSM258777.CEL  
70-T-cells-CD8+ GSM258776.CEL  
69-T-cells-CD8+ GSM258774.CEL  
68-T-cells-CD4+ GSM258773.CEL  
67-T-cells-CD4+ GSM258773.CEL  
66-Thymocyte-DN GSM465595.CEL  
65-Osteoclasts GSM258743.CEL  
64-Microglia GSM258721.CEL  
62-Microglia GSM258721.CEL  
61-PM-M-7h GSM258706.CEL  
60-PM-M-7h GSM258706.CEL  
59-PM-M-LPS-7h GSM268705.CEL  
58-PM-M-LPS-7h GSM268702.CEL  
57-PM-M-LPS-6h GSM258700.CEL  
56-PM-M-LPS-6h GSM258699.CEL  
55-BMM-LPS-6h GSM258694.CEL  
54-BMM-LPS-6h GSM258694.CEL  
53-Plasmacytoid-DC GSM258650.CEL  
52-Plasmacytoid-DC GSM258649.CEL  
51-CD8a-DC GSM258648.CEL  
50-CD8a-DC GSM258647.CEL  
49-CD8a+DC GSM258646.CEL  
48-CD8a+DC GSM258645.CEL  
46-NK-cells GSM258732.CEL  
45-NK-cells GSM258731.CEL  
44-Mast-cells-IgE+Ad GSM258718.CEL  
43-Mast-cells-IgE+Ad GSM258717.CEL  
42-Mast-cells-IgE GSM258714.CEL  
41-Mast-cells-IgE GSM258713.CEL  
40-Mast-cells GSM258712.CEL  
39-Granulocytes GSM258711.CEL  
38-Granulocytes GSM258667.CEL  
37-GMP GSM258666.CEL  
36-GMP GSM258665.CEL  
35-GMP GSM258642.CEL  
34-GMP GSM258641.CEL  
33-MEP GSM258720.CEL  
32-MEP GSM258719.CEL  
31-HESC GSM258770.CEL  
30-HESC GSM258770.CEL  
29-Bone marrow GSM258628.CEL  
28-Bone marrow GSM258627.CEL  
27-paneth-cells-GE GSM116358.CEL  
26-paneth-cells-GE GSM116357.CEL  
25-paneth-cells GSM116350.CEL  
24-paneth-cells GSM116359.CEL  
23-paneth-cells GSM318589.CEL  
22-paneth-cells GSM318590.CEL  
21-Colon-Crypt GSM480375.CEL  
20-Colon-Crypt GSM480374.CEL  
19-Colon-Vill GSM480363.CEL  
18-Colon-Vill GSM480362.CEL  
17-Colon-IEC-GE GSM349880.CEL  
16-Colon-IEC-GE GSM350375.CEL  
15-Ileum-IEC-TGF GSM350376.CEL  
14-Ileum-IEC GSM350371.CEL  
13-Small-intestine-epithelium RMINEP002001.CEL  
12-Small-intestine-epithelium RMINEP001001.CEL  
11-FAE-RMPYEP002001.CEL  
10-FAE-RMPYEP001001.CEL  
09-Ileum-IEC GSM190797.CEL  
08-Ileum-IEC GSM190796.CEL  
07-Ileum-IEC GSM190795.CEL  
06-CT-v-M-cells GSM190794.CEL  
05-CT-v-M-cells GSM190793.CEL  
04-PP-M-cells GSM190792.CEL  
03-PP-M-cells GSM190791.CEL  
02-PP-M-cells GSM190790.CEL  
01-PP-M-cells GSM190789.CEL



Cluster0343\_CDB+ T cells-related (7 nodes)

846.7  
802.1  
757.5  
713  
668.4  
623.9  
579.3  
534.7  
490.2  
446.6  
401  
356.5  
311.9  
267.4  
222.8  
178.2  
133.7  
89.1  
44.6  
0

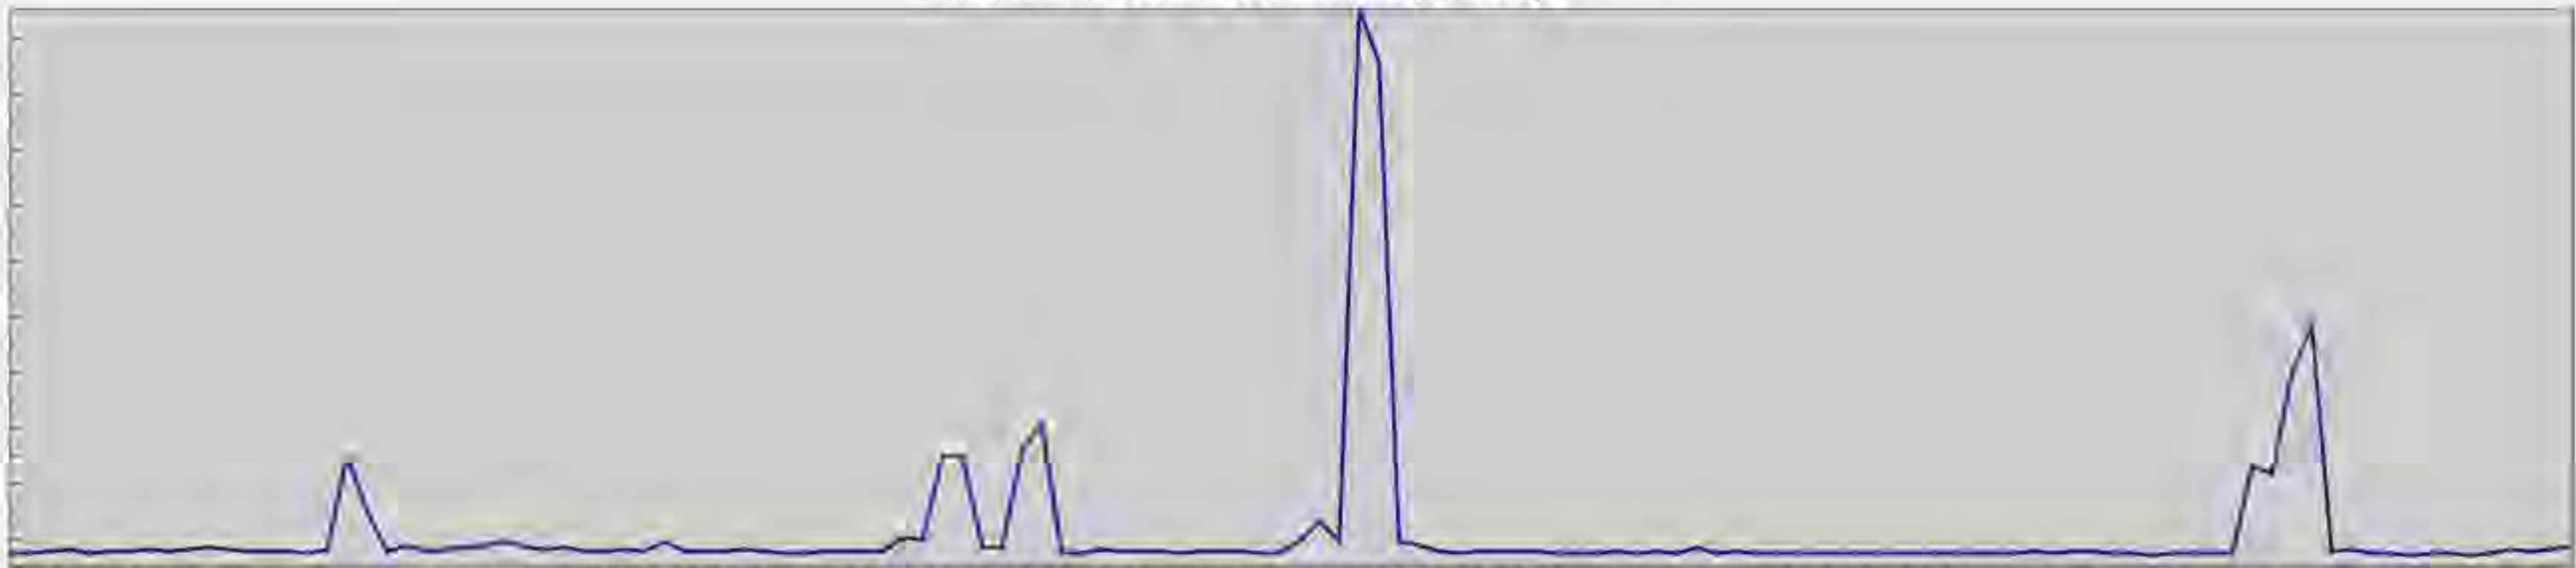

01- PP-M-cells\_GSM190789.CEL  
 02- PP-M-cells\_GSM190790.CEL  
 03- PP-M-cells\_GSM190791.CEL  
 04- PP-M-cells\_GSM190792.CEL  
 05- CT-v-M-cells\_GSM190793.CEL  
 06- CT-v-M-cells\_GSM190794.CEL  
 07- Ileum-EC\_GSM190795.CEL  
 08- Ileum-EC\_GSM190796.CEL  
 09- Ileum-EC\_GSM190797.CEL  
 10- FAE-RMPYEP001001.CEL  
 11- FAE-RMPYEP002001.CEL  
 12- Small-intestine-epithelium\_RMINEP001001.CEL  
 13- Small-intestine-epithelium\_RMINEP002001.CEL  
 14- Ileum-EC\_GSM350371.CEL  
 15- Ileum-EC\_GSM350375.CEL  
 16- Colon-IEC-Gf\_GSM349880.CEL  
 17- Colon-IEC-Gf\_GSM350375.CEL  
 18- Colon-Vill\_GSM480362.CEL  
 19- Colon-Vill\_GSM480363.CEL  
 20- Colon-Crypt\_GSM480374.CEL  
 21- Colon-Crypt\_GSM480375.CEL  
 22- Paneth-cells\_GSM318590.CEL  
 23- Paneth-cells\_GSM318589.CEL  
 24- Paneth-cells\_GSM116359.CEL  
 25- Paneth-cells\_GSM116359.CEL  
 26- Paneth-cells-Gf-1-GSM116357.CEL  
 27- Paneth-cells-Gf-1-GSM116357.CEL  
 28- Bone marrow\_GSM258627.CEL  
 29- Bone marrow\_GSM258627.CEL  
 30- HSC\_GSM258770.CEL  
 31- HSC\_GSM258770.CEL  
 32- MIEP\_GSM258770.CEL  
 33- MIEP\_GSM258770.CEL  
 34- MIEP\_GSM258770.CEL  
 35- CMP\_GSM258864.CEL  
 36- CMP\_GSM258864.CEL  
 37- GMP\_GSM258866.CEL  
 38- GMP\_GSM258866.CEL  
 39- Granulocytes\_GSM258667.CEL  
 40- Mast-cells\_GSM258712.CEL  
 41- Mast-cells\_GSM258712.CEL  
 42- Mast-cells-IdU+Ad-GSM258714.CEL  
 43- Mast-cells-IdU+Ad-GSM258714.CEL  
 44- Mast-cells-IdU+Ad-GSM258714.CEL  
 45- Mast-cells-IdU+Ad-GSM258714.CEL  
 46- NK-cells\_GSM258731.CEL  
 47- NK-cells\_GSM258731.CEL  
 48- CD8a+DC\_GSM258646.CEL  
 49- CD8a+DC\_GSM258646.CEL  
 50- CD8a-DC\_GSM258647.CEL  
 51- CD8a-DC\_GSM258647.CEL  
 52- CD8a-DC\_GSM258647.CEL  
 53- Plasmacytoid-DC\_GSM258650.CEL  
 54- Plasmacytoid-DC\_GSM258649.CEL  
 55- BM-M-PS-6h-GSM258694.CEL  
 56- BM-M-PS-6h-GSM258699.CEL  
 57- BM-M-PS-6h-GSM258700.CEL  
 58- BM-M-PS-7h-GSM258702.CEL  
 59- BM-M-PS-7h-GSM258706.CEL  
 60- BM-M-PS-7h-GSM258706.CEL  
 61- Microglia\_GSM258721.CEL  
 62- Microglia\_GSM258721.CEL  
 63- Osteoclasts\_GSM258743.CEL  
 64- Osteoclasts\_GSM258744.CEL  
 65- Thymocyte-DN\_GSM465595.CEL  
 66- T-cells-CD4+GSM258773.CEL  
 67- T-cells-CD4+GSM258773.CEL  
 68- T-cells-CD8+GSM258776.CEL  
 69- T-cells-CD8+GSM258776.CEL  
 70- T-cells-CD8+GSM258774.CEL  
 71- Tregs\_GSM258778.CEL  
 72- Tregs\_GSM258778.CEL  
 73- BAF3\_GSM258620.CEL  
 74- BAF3\_GSM258620.CEL  
 75- MZ-Bcell\_GSM258621.CEL  
 76- MZ-Bcell\_GSM258621.CEL  
 77- Follicular-Bcells\_GSM258664.CEL  
 78- Follicular-Bcells\_GSM258664.CEL  
 79- E-L-Y-RMLNDC002001.CEL  
 80- E-L-Y-RMLNDC003001.CEL  
 81- PP-FDC\_GSM481976.CEL  
 82- PP-FDC\_GSM481976.CEL  
 83- PP-FDC\_GSM481977.CEL  
 84- Lymph-endo-cells\_GSM143704.CEL  
 85- MS-1\_GSM234692.CEL  
 86- Tt cell\_GSM465596.CEL  
 87- Nat Helper cell\_GSM465594.CEL  
 88- Nat Helper cell\_GSM465594.CEL  
 89- Chondrocytes\_GSM266741.CEL  
 90- Chondrocytes\_GSM266741.CEL  
 91- Osteoblast-d5\_GSM258741.CEL  
 92- Osteoblast-d5\_GSM258742.CEL  
 93- Osteoblast-d14\_GSM258737.CEL  
 94- Osteoblast-d21\_GSM258738.CEL  
 95- Osteoblast-d21\_GSM258739.CEL  
 96- Osteoblast-d21\_GSM258631.CEL  
 97- OT12\_GSM258609.CEL  
 98- OT12\_GSM258609.CEL  
 99- OT12\_GSM258609.CEL  
 100- 3T3-L1\_GSM258610.CEL  
 101- 3T3-L1\_GSM258610.CEL  
 102- NIH3T3\_GSM258739.CEL  
 103- C2C12\_GSM258862.CEL  
 104- Bruce4\_GSM258865.CEL  
 105- Bruce4\_GSM258865.CEL  
 106- Bruce4\_GSM258865.CEL  
 107- MIMCD3\_GSM258723.CEL  
 108- MIMCD3\_GSM258723.CEL  
 109- mimb\_GSM258725.CEL  
 110- mimb\_GSM258725.CEL  
 111- Astrocytes\_GSM241898.CEL  
 112- Astrocytes\_GSM241898.CEL  
 113- Spleen\_GSM258767.CEL  
 114- Spleen\_GSM258767.CEL  
 115- Spleen\_GSM258767.CEL  
 116- Lymph-nodes\_GSM258691.CEL  
 117- Lymph-nodes\_GSM258691.CEL  
 118- Intestine-small\_GSM258692.CEL  
 119- Intestine-small\_GSM258692.CEL  
 120- Intestine-large\_GSM258675.CEL  
 121- Intestine-large\_GSM258675.CEL  
 122- Intestine-large\_GSM258675.CEL  
 123- Colon-d4\_GSM198810.CEL  
 124- Colon-d4\_GSM198810.CEL  
 125- Colon-d9\_GSM198810.CEL  
 126- Colon-d9\_GSM198810.CEL  
 127- NALT\_GSM289408.CEL  
 128- NALT\_GSM289409.CEL  
 129- NALT\_GSM289410.CEL  
 130- NALT\_GSM289411.CEL



Cluster0344\_Regulatory T cells-related (7 nodes)

1,936.1  
1,834.2  
1,732.3  
1,630.4  
1,528.5  
1,426.6  
1,324.7  
1,222.8  
1,120.9  
1,019  
917.1  
815.2  
713.3  
611.4  
509.5  
407.6  
305.7  
203.8  
101.9  
0

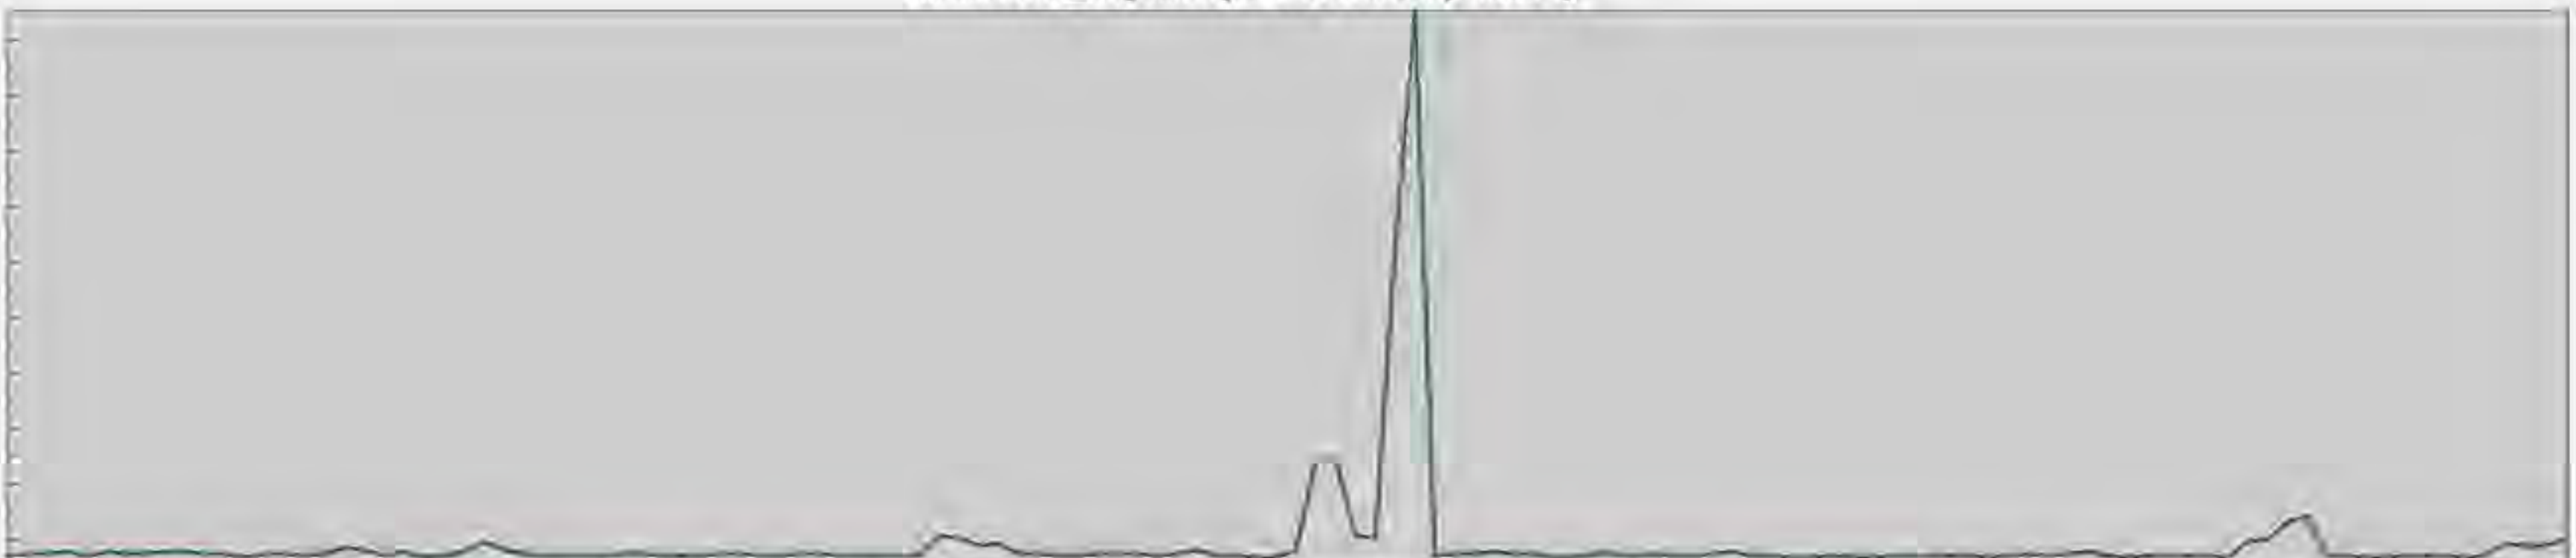

30-NALT GSM289411 CELL  
29-NALT GSM289410 CELL  
28-NALT GSM289409 CELL  
27-NALT GSM289408 CELL  
26-Color-d9 GSM1988105 CELL  
25-Color-d9 GSM1988104 CELL  
24-Color-d9 GSM1988103 CELL  
23-Color-d4 GSM1988102 CELL  
22-Color-d4 GSM1988101 CELL  
21-Intestine-large GSM258676 CELL  
20-Intestine-large GSM258675 CELL  
19-Intestine-small GSM258677 CELL  
18-Intestine-small GSM258692 CELL  
17-Lymph-nodes GSM258691 CELL  
16-Spleen GSM258766 CELL  
15-Spleen GSM258767 CELL  
14-Neuro2a GSM258728 CELL  
13-Neuro2a GSM258729 CELL  
12-Astrocytes GSM241898 CELL  
11-ming GSM258726 CELL  
10-ming GSM258725 CELL  
09-MIMCD3 GSM258724 CELL  
08-MIMCD3 GSM258723 CELL  
07-Bruce4 GSM258656 CELL  
06-Bruce4 GSM258655 CELL  
05-C2C12 GSM258690 CELL  
04-C2C12 GSM258689 CELL  
03-NH3T3 GSM258730 CELL  
02-NH3T3 GSM258729 CELL  
01-3T3-L1 GSM258610 CELL  
99-3T3-L1 GSM258609 CELL  
98-10T12 GSM258632 CELL  
97-10T12 GSM258631 CELL  
96-Osteoblast-d21 GSM258740 CELL  
95-Osteoblast-d21 GSM258739 CELL  
94-Osteoblast-d14 GSM258738 CELL  
93-Osteoblast-d14 GSM258737 CELL  
92-Osteoblast-d5 GSM258742 CELL  
91-Osteoblast-d5 GSM258741 CELL  
90-Chondrocytes GSM266741 CELL  
89-Chondrocytes GSM266740 CELL  
88-Nat Helper cell GSM465594 CELL  
87-Nat Helper cell GSM465593 CELL  
86-LT cell GSM465596 CELL  
85-MS-1 GSM234692 CELL  
84-Lymph-endo-cells GSM143704 CELL  
83-PP-FDC GSM481977 CELL  
82-PP-FDC GSM481978 CELL  
81-PP-FDC GSM481976 CELL  
80-LY-RMLNDCC003001 CELL  
79-LY-RMLNDCC003001 CELL  
78-Follicular-Bcells GSM258664 CELL  
77-Follicular-Bcells GSM258663 CELL  
76-MZ-Bcell GSM258627 CELL  
75-MZ-Bcell GSM258627 CELL  
74-BAF3 GSM258620 CELL  
73-BAF3 GSM258619 CELL  
72-Tregs GSM258778 CELL  
71-Tregs GSM258777 CELL  
70-T-cells-CD8+ GSM258776 CELL  
69-T-cells-CD8+ GSM258774 CELL  
68-T-cells-CD4+ GSM258773 CELL  
67-T-cells-CD4+ GSM258744 CELL  
66-Thymocyte-DN GSM465595 CELL  
65-Osteoclasts GSM258743 CELL  
64-Microglia GSM258727 CELL  
63-Microglia GSM258727 CELL  
62-MM-PS-7h GSM258705 CELL  
61-MM-PS-7h GSM258705 CELL  
60-MM-PS-6h GSM258702 CELL  
59-MM-PS-6h GSM258701 CELL  
58-MM-LPS-6h GSM258699 CELL  
57-MM-LPS-6h GSM258699 CELL  
56-MM-LPS-6h GSM258694 CELL  
55-MM-LPS-6h GSM258694 CELL  
54-Ismacryoid-DC GSM258650 CELL  
53-Ismacryoid-DC GSM258649 CELL  
52-CD8a-DC GSM258648 CELL  
51-CD8a-DC GSM258647 CELL  
50-CD8a-DC GSM258647 CELL  
49-CD8a+DC GSM258646 CELL  
48-CD8a+DC GSM258646 CELL  
47-NK-cells GSM258732 CELL  
46-NK-cells GSM258731 CELL  
45-Mast-cells-IgE+Ad GSM258718 CELL  
44-Mast-cells-IgE+Ad GSM258717 CELL  
43-Mast-cells-IgE GSM258714 CELL  
42-Mast-cells-IgE GSM258713 CELL  
41-Mast-cells GSM258712 CELL  
40-Granulocytes GSM258668 CELL  
39-Granulocytes GSM258667 CELL  
38-GMP GSM258666 CELL  
37-GMP GSM258665 CELL  
36-GMP GSM258664 CELL  
35-GMP GSM258642 CELL  
34-MPEP GSM258641 CELL  
33-MPEP GSM258641 CELL  
32-MPEP GSM258770 CELL  
31-HESC GSM258770 CELL  
30-Bone marrow GSM258628 CELL  
29-Bone marrow GSM258627 CELL  
28-paneth-cells-GE GSM116357 CELL  
27-paneth-cells-GE GSM116358 CELL  
26-paneth-cells-GE GSM116359 CELL  
25-paneth-cells GSM116360 CELL  
24-paneth-cells GSM116359 CELL  
23-paneth-cells GSM318589 CELL  
22-paneth-cells GSM318590 CELL  
21-paneth-cells GSM480375 CELL  
20-paneth-cells GSM480374 CELL  
19-paneth-cells GSM480363 CELL  
18-paneth-cells GSM480362 CELL  
17-paneth-cells GSM349880 CELL  
16-paneth-cells GSM350375 CELL  
15-paneth-cells GSM350376 CELL  
14-paneth-cells GSM350371 CELL  
13-paneth-cells GSM258677 CELL  
12-paneth-cells GSM258677 CELL  
11-paneth-cells GSM258677 CELL  
10-paneth-cells GSM258677 CELL  
9-paneth-cells GSM258677 CELL  
8-paneth-cells GSM258677 CELL  
7-paneth-cells GSM258677 CELL  
6-paneth-cells GSM258677 CELL  
5-paneth-cells GSM258677 CELL  
4-paneth-cells GSM258677 CELL  
3-paneth-cells GSM258677 CELL  
2-paneth-cells GSM258677 CELL  
1-paneth-cells GSM258677 CELL



Cluster0345\_Uncertain (7 nodes)

1,362.5  
1,290.8  
1,219.1  
1,147.4  
1,075.6  
1,003.9  
932.2  
860.5  
788.8  
717.1  
645.4  
573.7  
502  
430.3  
358.5  
286.8  
215.1  
143.4  
71.7  
0

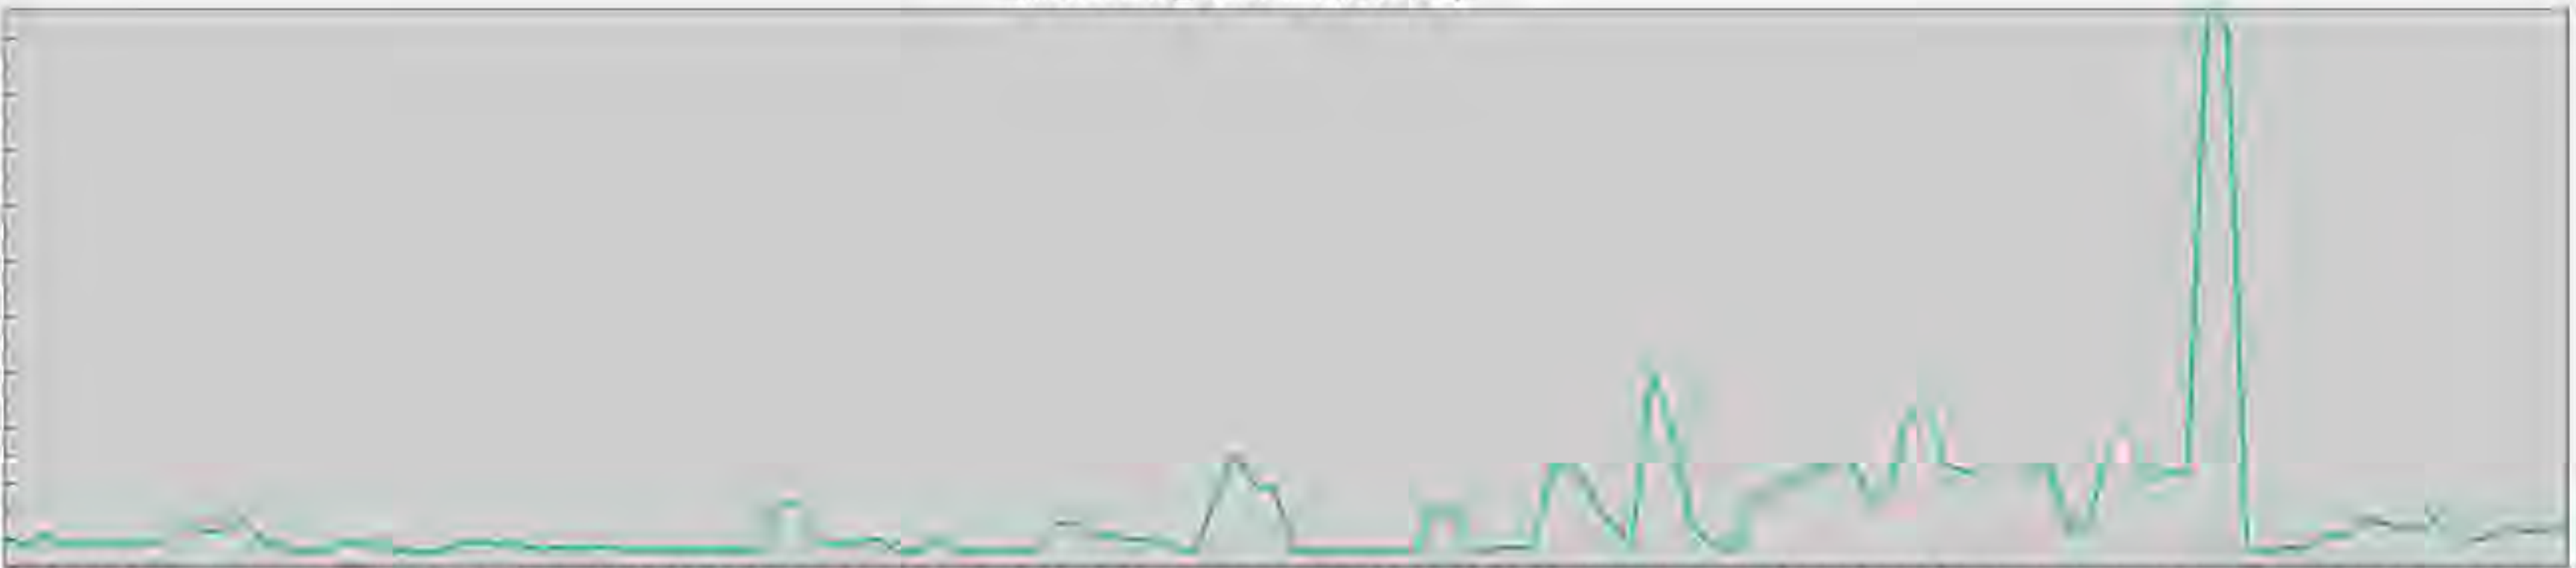

130-NALT GSM289411 CELL  
129-NALT GSM289410 CELL  
128-NALT GSM289409 CELL  
127-NALT GSM289408 CELL  
126-Colon-d9 GSM1988105 CELL  
125-Colon-d9 GSM1988103 CELL  
124-Colon-d9 GSM1988102 CELL  
123-Colon-d4 GSM1988101 CELL  
122-Intestine-large GSM258676 CELL  
121-Intestine-large GSM258675 CELL  
120-Intestine-large GSM258673 CELL  
119-Intestine-small GSM258672 CELL  
118-Intestine-small GSM258671 CELL  
117-Lymph-nodes GSM258669 CELL  
116-Lymph-nodes GSM258668 CELL  
115-Spleen GSM258667 CELL  
114-Spleen GSM258666 CELL  
113-Neuro2a GSM258665 CELL  
112-Neuro2a GSM241898 CELL  
111-Astrocytes GSM241898 CELL  
110-mimb GSM258726 CELL  
109-mimb GSM258725 CELL  
108-MIMCD3 GSM258724 CELL  
107-MIMCD3 GSM258723 CELL  
106-Bruce4 GSM258665 CELL  
105-Bruce4 GSM258665 CELL  
104-C2C12 GSM258690 CELL  
103-C2C12 GSM258689 CELL  
102-NH3T3 GSM258730 CELL  
101-NH3T3 GSM258729 CELL  
100-3T3-L1 GSM258610 CELL  
99-3T3-L1 GSM258609 CELL  
98-10T12 GSM258632 CELL  
97-10T12 GSM258631 CELL  
96-Osteoblast-d21 GSM258740 CELL  
95-Osteoblast-d21 GSM258739 CELL  
94-Osteoblast-d14 GSM258738 CELL  
93-Osteoblast-d14 GSM258737 CELL  
92-Osteoblast-d5 GSM258742 CELL  
91-Osteoblast-d5 GSM258741 CELL  
90-Chondrocytes GSM266741 CELL  
89-Chondrocytes GSM266740 CELL  
88-Nat Helper cell GSM465594 CELL  
87-Nat Helper cell GSM465593 CELL  
86-TT cell GSM465596 CELL  
85-MS-1 GSM234692 CELL  
84-Lymph-endo-cells GSM143704 CELL  
83-P-FDC GSM481977 CELL  
82-P-FDC GSM481978 CELL  
81-P-FDC GSM481976 CELL  
80-F-L-Y RMLNDCC003001 CELL  
79-F-L-Y RMLNDCC003001 CELL  
78-Follicular-Bcells GSM258664 CELL  
77-Follicular-Bcells GSM258663 CELL  
76-MZ-Bcell GSM258627 CELL  
75-MZ-Bcell GSM258627 CELL  
74-BAF3 GSM258620 CELL  
73-BAF3 GSM258619 CELL  
72-Tregs GSM258778 CELL  
71-Tregs GSM258777 CELL  
70-T-cells-CD8+ GSM258776 CELL  
69-T-cells-CD8+ GSM258774 CELL  
68-T-cells-CD4+ GSM258773 CELL  
67-T-cells-CD4+ GSM258744 CELL  
66-Thymocyte-DN GSM465595 CELL  
65-Osteoclasts GSM258743 CELL  
64-Osteoclasts GSM258743 CELL  
63-Microglia GSM258721 CELL  
62-Microglia GSM258721 CELL  
61-MM-LPS-7h GSM258706 CELL  
60-MM-LPS-7h GSM258706 CELL  
59-MM-LPS-6h GSM258702 CELL  
58-MM-LPS-6h GSM258702 CELL  
57-MM-LPS-6h GSM258699 CELL  
56-MM-LPS-6h GSM258699 CELL  
55-MM-LPS-6h GSM258694 CELL  
54-MM-LPS-6h GSM258694 CELL  
53-Iasmacryoid-DC GSM258650 CELL  
52-Iasmacryoid-DC GSM258649 CELL  
51-CD8a-DC GSM258648 CELL  
50-CD8a-DC GSM258647 CELL  
49-CD8a+DC GSM258646 CELL  
48-CD8a+DC GSM258646 CELL  
47-NK-cells GSM258732 CELL  
46-NK-cells GSM258731 CELL  
45-Mast-cells-IgE+Ad GSM258719 CELL  
44-Mast-cells-IgE+Ad GSM258717 CELL  
43-Mast-cells-IgE GSM258714 CELL  
42-Mast-cells-IgE GSM258713 CELL  
41-Mast-cells GSM258712 CELL  
40-Granulocytes GSM258668 CELL  
39-Granulocytes GSM258667 CELL  
38-GMP GSM258666 CELL  
37-GMP GSM258666 CELL  
36-GMP GSM258665 CELL  
35-GMP GSM258665 CELL  
34-MPEP GSM258642 CELL  
33-MPEP GSM258642 CELL  
32-MPEP GSM258720 CELL  
31-HESC GSM258770 CELL  
30-HESC GSM258770 CELL  
29-Bone marrow GSM258628 CELL  
28-Bone marrow GSM258627 CELL  
27-paneth-cells-GF-1 GSM116358 CELL  
26-paneth-cells-GF-1 GSM116357 CELL  
25-paneth-cells GSM116350 CELL  
24-paneth-cells GSM116359 CELL  
23-paneth-cells GSM318589 CELL  
22-paneth-cells GSM318590 CELL  
21-paneth-cells GSM480375 CELL  
20-paneth-cells GSM480375 CELL  
19-paneth-cells GSM480363 CELL  
18-paneth-cells GSM480362 CELL  
17-paneth-cells GSM349880 CELL  
16-paneth-cells GSM350375 CELL  
15-paneth-cells GSM350376 CELL  
14-paneth-cells GSM350371 CELL  
13-paneth-cells GSM258678 CELL  
12-paneth-cells GSM258677 CELL  
11-paneth-cells GSM258677 CELL  
10-paneth-cells GSM258677 CELL  
9-paneth-cells GSM258677 CELL  
8-paneth-cells GSM258677 CELL  
7-paneth-cells GSM258677 CELL  
6-paneth-cells GSM258677 CELL  
5-paneth-cells GSM258677 CELL  
4-paneth-cells GSM258677 CELL  
3-paneth-cells GSM258677 CELL  
2-paneth-cells GSM258677 CELL  
1-paneth-cells GSM258677 CELL







Cluster0347\_Uncertain-low in many (7 nodes)

103.7  
98.2  
92.8  
87.3  
81.9  
76.4  
71  
65.5  
60  
54.6  
49.1  
43.7  
38.2  
32.7  
27.3  
21.8  
16.4  
10.9  
5.5  
0

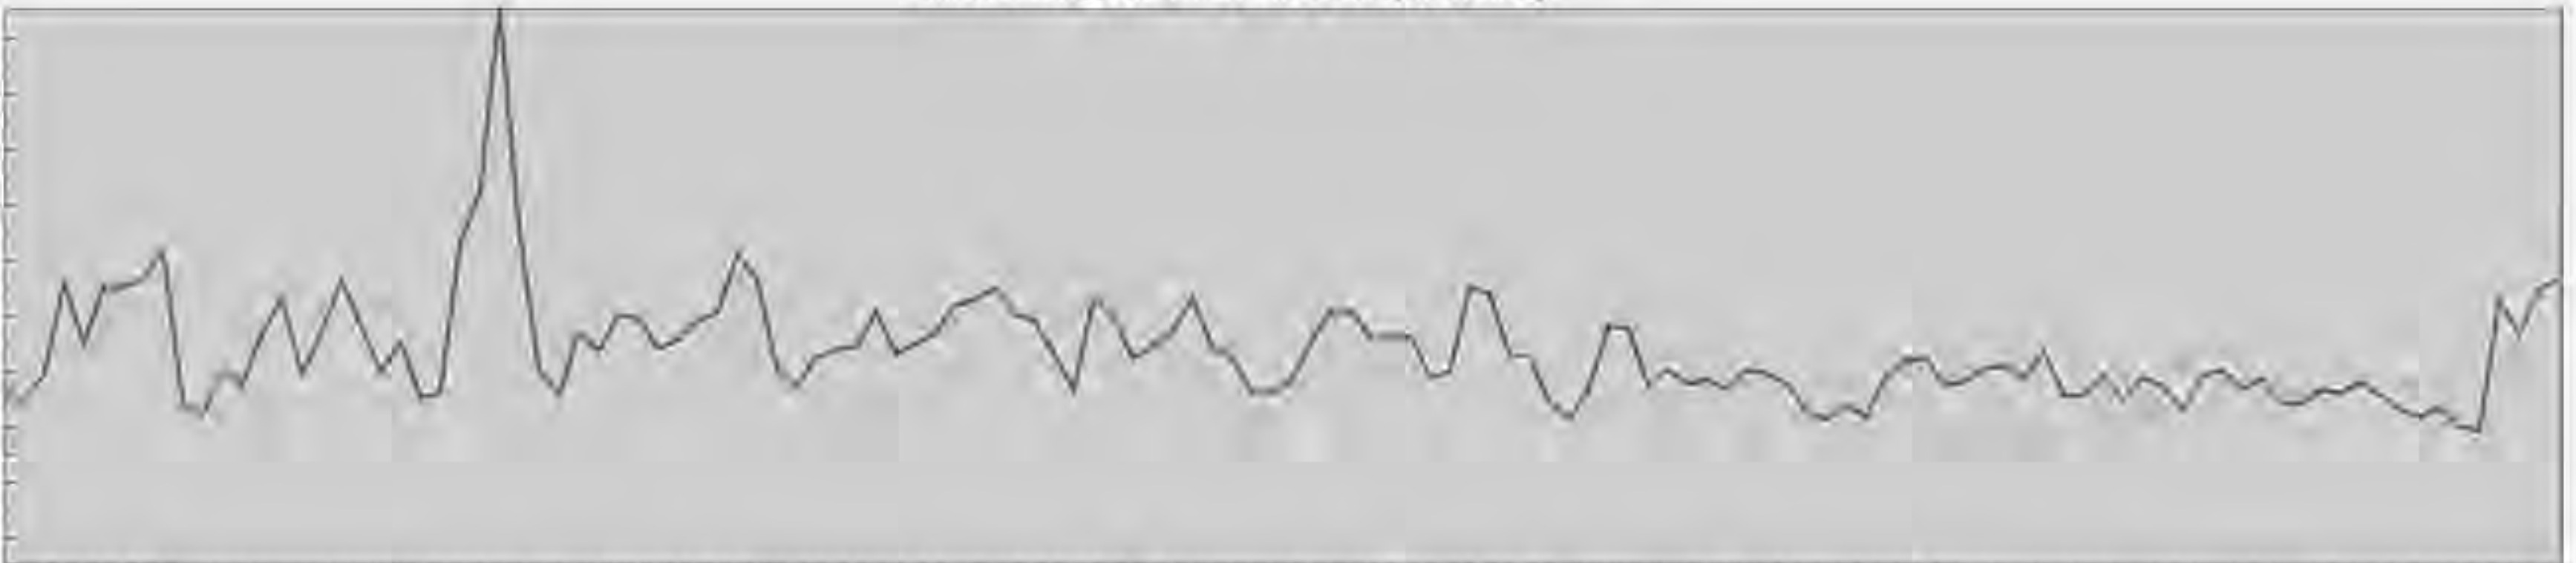

130- NALT GSM289411 CELL  
 129- NALT GSM289410 CELL  
 127- NALT GSM289408 CELL  
 126- Colon-d9 GSM1988105 CELL  
 125- Colon-d9 GSM1988103 CELL  
 124- Colon-d9 GSM1988102 CELL  
 123- Colon-d4 GSM1988101 CELL  
 122- Colon-d4 GSM1988100 CELL  
 121- Intestine-large GSM258676 CELL  
 120- Intestine-large GSM258675 CELL  
 119- Intestine-small GSM258678 CELL  
 118- Intestine-small GSM258692 CELL  
 117- Lymph-nodes GSM258691 CELL  
 116- Lymph-nodes GSM258726 CELL  
 115- Spleen GSM258767 CELL  
 114- Spleen GSM258767 CELL  
 113- Neuro2a GSM258728 CELL  
 112- Neuro2a GSM258727 CELL  
 111- Astrocytes GSM241898 CELL  
 110- mimb GSM258725 CELL  
 109- mimb GSM258725 CELL  
 108- MIMCD3 GSM258724 CELL  
 107- MIMCD3 GSM258723 CELL  
 106- Bruce4 GSM258656 CELL  
 105- Bruce4 GSM258656 CELL  
 104- C2C12 GSM258690 CELL  
 103- C2C12 GSM258629 CELL  
 102- NIH3T3 GSM258730 CELL  
 101- NIH3T3 GSM258729 CELL  
 100- 3T3-L1 GSM258610 CELL  
 99- 3T3-L1 GSM258609 CELL  
 98- 10T12 GSM258632 CELL  
 97- 10T12 GSM258631 CELL  
 96- Osteoblast-d21 GSM258740 CELL  
 95- Osteoblast-d21 GSM258739 CELL  
 94- Osteoblast-d14 GSM258738 CELL  
 93- Osteoblast-d14 GSM258737 CELL  
 92- Osteoblast-d5 GSM258742 CELL  
 91- Osteoblast-d5 GSM258741 CELL  
 90- Chondrocytes GSM266741 CELL  
 89- Chondrocytes GSM266740 CELL  
 88- Nat Helper cell GSM465594 CELL  
 87- Nat Helper cell GSM465593 CELL  
 86- Tt cell GSM465596 CELL  
 85- MS-1 GSM234692 CELL  
 84- Lymph-endo-cells GSM143704 CELL  
 83- P-FDC GSM481977 CELL  
 82- P-FDC GSM481978 CELL  
 81- P-FDC GSM481976 CELL  
 80- E-L Y RMLNDCC003001 CELL  
 79- E-L Y RMLNDCC003001 CELL  
 78- Follicular-Bcells GSM258664 CELL  
 77- Follicular-Bcells GSM258663 CELL  
 76- MZ-Bcell GSM258627 CELL  
 75- MZ-Bcell GSM258621 CELL  
 74- BAF3 GSM258620 CELL  
 73- BAF3 GSM258619 CELL  
 72- Tregs GSM258778 CELL  
 71- Tregs GSM258777 CELL  
 70- T-cells CD8+ GSM258776 CELL  
 69- T-cells CD8+ GSM258774 CELL  
 68- T-cells CD4+ GSM258773 CELL  
 67- T-cells CD4+ GSM258773 CELL  
 66- Thymocyte-DN GSM465595 CELL  
 65- Osteoclasts GSM258743 CELL  
 64- Microglia GSM258721 CELL  
 63- Microglia GSM258721 CELL  
 62- PMM-LPS-7h GSM258706 CELL  
 61- PMM-LPS-7h GSM258705 CELL  
 60- PMM-LPS-7h GSM258702 CELL  
 59- PMM-LPS-6h GSM258700 CELL  
 58- PMM-LPS-6h GSM258699 CELL  
 57- BMM-LPS-6h GSM258699 CELL  
 56- BMM-LPS-6h GSM258694 CELL  
 55- BMM-LPS-6h GSM258694 CELL  
 54- BMM-LPS-6h GSM258694 CELL  
 53- Plasmacytoid-DC GSM258650 CELL  
 52- CD8a-DC GSM258649 CELL  
 51- CD8a-DC GSM258647 CELL  
 50- CD8a-DC GSM258647 CELL  
 49- CD8a+DC GSM258646 CELL  
 48- CD8a+DC GSM258645 CELL  
 47- NK-cells GSM258732 CELL  
 46- NK-cells GSM258731 CELL  
 45- Mast-cells-IgE+Ad GSM258719 CELL  
 44- Mast-cells-IgE+Ad GSM258717 CELL  
 43- Mast-cells-IgE GSM258714 CELL  
 42- Mast-cells-IgE GSM258713 CELL  
 41- Mast-cells GSM258712 CELL  
 40- Mast-cells GSM258711 CELL  
 39- Granulocytes GSM258668 CELL  
 38- Granulocytes GSM258667 CELL  
 37- GMP GSM258666 CELL  
 36- GMP GSM258666 CELL  
 35- GMP GSM258665 CELL  
 34- GMP GSM258664 CELL  
 33- MIEP GSM258872 CELL  
 32- MIEP GSM258871 CELL  
 31- HESC GSM258770 CELL  
 30- HESC GSM258769 CELL  
 29- Bone marrow GSM258628 CELL  
 28- Bone marrow GSM258627 CELL  
 27- paneth-cells-GE GSM116358 CELL  
 26- paneth-cells-GE GSM116357 CELL  
 25- paneth-cells GSM116350 CELL  
 24- paneth-cells GSM116350 CELL  
 23- paneth-cells GSM318589 CELL  
 22- paneth-cells GSM318589 CELL  
 21- Colon-Crypt GSM480375 CELL  
 20- Colon-Crypt GSM480374 CELL  
 19- Colon-Vill GSM480363 CELL  
 18- Colon-Vill GSM480362 CELL  
 17- Colon-IEC-GE GSM349880 CELL  
 16- Colon-IEC-GE GSM350375 CELL  
 15- Ileum-IEC-TGF GSM350376 CELL  
 14- Ileum-IEC GSM350371 CELL  
 13- Small-intestine-epithelium RMINEP002901 CELL  
 12- Small-intestine-epithelium RMINEP001001 CELL  
 11- FAE-RMPYEP002001 CELL  
 10- FAE-RMPYEP001001 CELL  
 09- Ileum-IEC GSM190797 CELL  
 08- Ileum-IEC GSM190796 CELL  
 07- Ileum-IEC GSM190795 CELL  
 06- CT-v-M-cells GSM190794 CELL  
 05- CT-v-M-cells GSM190793 CELL  
 04- CT-v-M-cells GSM190792 CELL  
 03- PP-M-cells GSM190791 CELL  
 02- PP-M-cells GSM190790 CELL  
 01- PP-M-cells GSM190789 CELL



Cluster0348\_High in lymphatic endothelial cells and NH cells (7 nodes)

2,484.6  
2,353.8  
2,223  
2,092.3  
1,961.5  
1,830.7  
1,700  
1,569.2  
1,438.4  
1,307.7  
1,176.9  
1,046.1  
915.4  
784.6  
653.8  
523.1  
392.3  
261.5  
130.8  
0

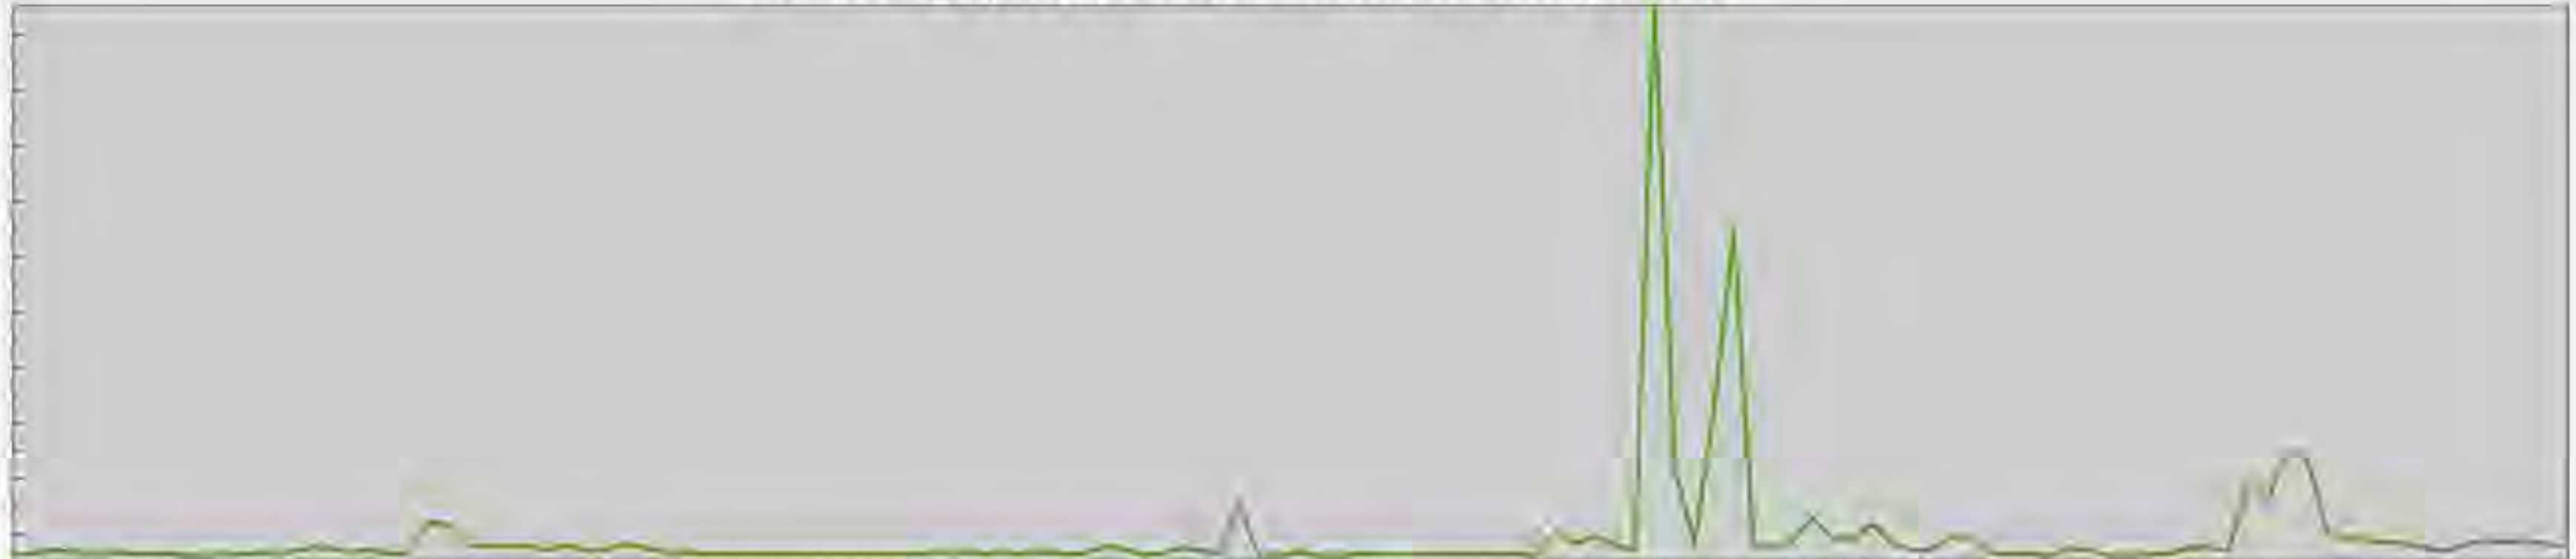

130-NALT GSM289411 CEL  
 129-NALT GSM289410 CEL  
 128-NALT GSM289409 CEL  
 127-NALT GSM289408 CEL  
 126-CD9 GSM1988105 CEL  
 125-CD9 GSM1988104 CEL  
 124-CD9 GSM1988103 CEL  
 123-CD9 GSM1988102 CEL  
 122-CD9 GSM1988101 CEL  
 121-Intestine-large GSM258676 CEL  
 120-Intestine-large GSM258675 CEL  
 119-Intestine-small GSM258674 CEL  
 118-Intestine-small GSM258673 CEL  
 117-Lymph-nodes GSM258672 CEL  
 116-Lymph-nodes GSM258671 CEL  
 115-Spleen GSM258767 CEL  
 114-Spleen GSM258766 CEL  
 113-Neuro2a GSM258728 CEL  
 112-Neuro2a GSM258727 CEL  
 111-Astrocytes GSM241898 CEL  
 110-mimb GSM258726 CEL  
 109-mimb GSM258725 CEL  
 108-MIMCD3 GSM258724 CEL  
 107-MIMCD3 GSM258723 CEL  
 106-Bruce4 GSM258656 CEL  
 105-Bruce4 GSM258655 CEL  
 104-C2C12 GSM258690 CEL  
 103-C2C12 GSM258689 CEL  
 102-NH3T3 GSM258730 CEL  
 101-NH3T3 GSM258729 CEL  
 100-3T3-L1 GSM258610 CEL  
 99-3T3-L1 GSM258609 CEL  
 98-10T12 GSM258632 CEL  
 97-10T12 GSM258631 CEL  
 96-Osteoblast-d21 GSM258740 CEL  
 95-Osteoblast-d21 GSM258739 CEL  
 94-Osteoblast-d14 GSM258738 CEL  
 93-Osteoblast-d14 GSM258737 CEL  
 92-Osteoblast-d5 GSM258742 CEL  
 91-Osteoblast-d5 GSM258741 CEL  
 90-Chondrocytes GSM266741 CEL  
 89-Chondrocytes GSM266740 CEL  
 88-Nat Helper cell GSM465594 CEL  
 87-Nat Helper cell GSM465593 CEL  
 86-LT cell GSM465596 CEL  
 85-MS-1 GSM234692 CEL  
 84-Lymph-endo-cells GSM143704 CEL  
 83-PP-FDC GSM481977 CEL  
 82-PP-FDC GSM481976 CEL  
 81-PP-FDC GSM481975 CEL  
 80-LY-RMLNDCC003001 CEL  
 79-LY-RMLNDCC003001 CEL  
 78-Follicular-Bcells GSM258664 CEL  
 77-Follicular-Bcells GSM258663 CEL  
 76-MZ-Bcell GSM258627 CEL  
 75-MZ-Bcell GSM258626 CEL  
 74-BAF3 GSM258620 CEL  
 73-BAF3 GSM258619 CEL  
 72-Tregs GSM258778 CEL  
 71-Tregs GSM258777 CEL  
 70-T-cells-CD8+ GSM258776 CEL  
 69-T-cells-CD8+ GSM258775 CEL  
 68-T-cells-CD4+ GSM258774 CEL  
 67-T-cells-CD4+ GSM258773 CEL  
 66-Thymocyte-DN GSM465595 CEL  
 65-Osteoclasts GSM258743 CEL  
 64-Microglia GSM258721 CEL  
 63-Microglia GSM258720 CEL  
 62-MM-PS-7h GSM258706 CEL  
 61-MM-PS-7h GSM258705 CEL  
 60-MM-PS-6h GSM258702 CEL  
 59-MM-PS-6h GSM258701 CEL  
 58-MM-LPS-6h GSM258699 CEL  
 57-MM-LPS-6h GSM258698 CEL  
 56-MM-LPS-6h GSM258694 CEL  
 55-MM-LPS-6h GSM258693 CEL  
 54-Plasmacytoid-DC GSM258650 CEL  
 53-Plasmacytoid-DC GSM258649 CEL  
 52-CD8a-DC GSM258647 CEL  
 51-CD8a-DC GSM258646 CEL  
 50-CD8a+DC GSM258645 CEL  
 49-CD8a+DC GSM258644 CEL  
 48-NK-cells GSM258732 CEL  
 47-NK-cells GSM258731 CEL  
 46-Mast-cells-IgE+Ad GSM258718 CEL  
 45-Mast-cells-IgE+Ad GSM258717 CEL  
 44-Mast-cells-IgE GSM258714 CEL  
 43-Mast-cells-IgE GSM258713 CEL  
 42-Mast-cells-IgE GSM258712 CEL  
 41-Mast-cells GSM258711 CEL  
 40-Granulocytes GSM258667 CEL  
 39-Granulocytes GSM258666 CEL  
 38-GMP GSM258665 CEL  
 37-GMP GSM258664 CEL  
 36-GMP GSM258662 CEL  
 35-GMP GSM258661 CEL  
 34-MEP GSM2588720 CEL  
 33-MEP GSM2588719 CEL  
 32-MEP GSM2588718 CEL  
 31-HESC GSM2588717 CEL  
 30-HESC GSM2588716 CEL  
 29-Bone marrow GSM2588628 CEL  
 28-Bone marrow GSM2588627 CEL  
 27-paneth-cells-GF-1 GSM116357 CEL  
 26-paneth-cells-GF-1 GSM116356 CEL  
 25-paneth-cells GSM116350 CEL  
 24-paneth-cells GSM116359 CEL  
 23-paneth-cells GSM318589 CEL  
 22-paneth-cells GSM318590 CEL  
 21-Colon-Crypt GSM480375 cel  
 20-Colon-Crypt GSM480374 cel  
 19-Colon-Vill GSM480363 cel  
 18-Colon-Vill GSM480362 cel  
 17-Colon-IEC-GF GSM349880 CEL  
 16-Colon-IEC-GF GSM350375 CEL  
 15-Ileum-IEC GSM350376 CEL  
 14-Ileum-IEC GSM350371 CEL  
 13-Small-intestine-epithelium RMINEP002001 CEL  
 12-Small-intestine-epithelium RMINEP001001 CEL  
 11-FAE-RMPYEP002001 CEL  
 10-FAE-RMPYEP001001 CEL  
 9-Ileum-IEC GSM190797 CEL  
 8-Ileum-IEC GSM190796 CEL  
 7-Ileum-IEC GSM190795 CEL  
 6-CT-v-M-cells GSM190794 CEL  
 5-CT-v-M-cells GSM190793 CEL  
 4-CT-v-M-cells GSM190792 CEL  
 3-PP-M-cells GSM190791 CEL  
 2-PP-M-cells GSM190790 CEL  
 1-PP-M-cells GSM190789 CEL



Cluster0349\_High in Bruce4 cells (7 nodes)

2,259.9  
2,140.9  
2,022  
1,903  
1,784.1  
1,665.2  
1,546.2  
1,427.3  
1,308.3  
1,189.4  
1,070.5  
951.5  
832.6  
713.6  
594.7  
475.8  
356.8  
237.9  
118.9  
0

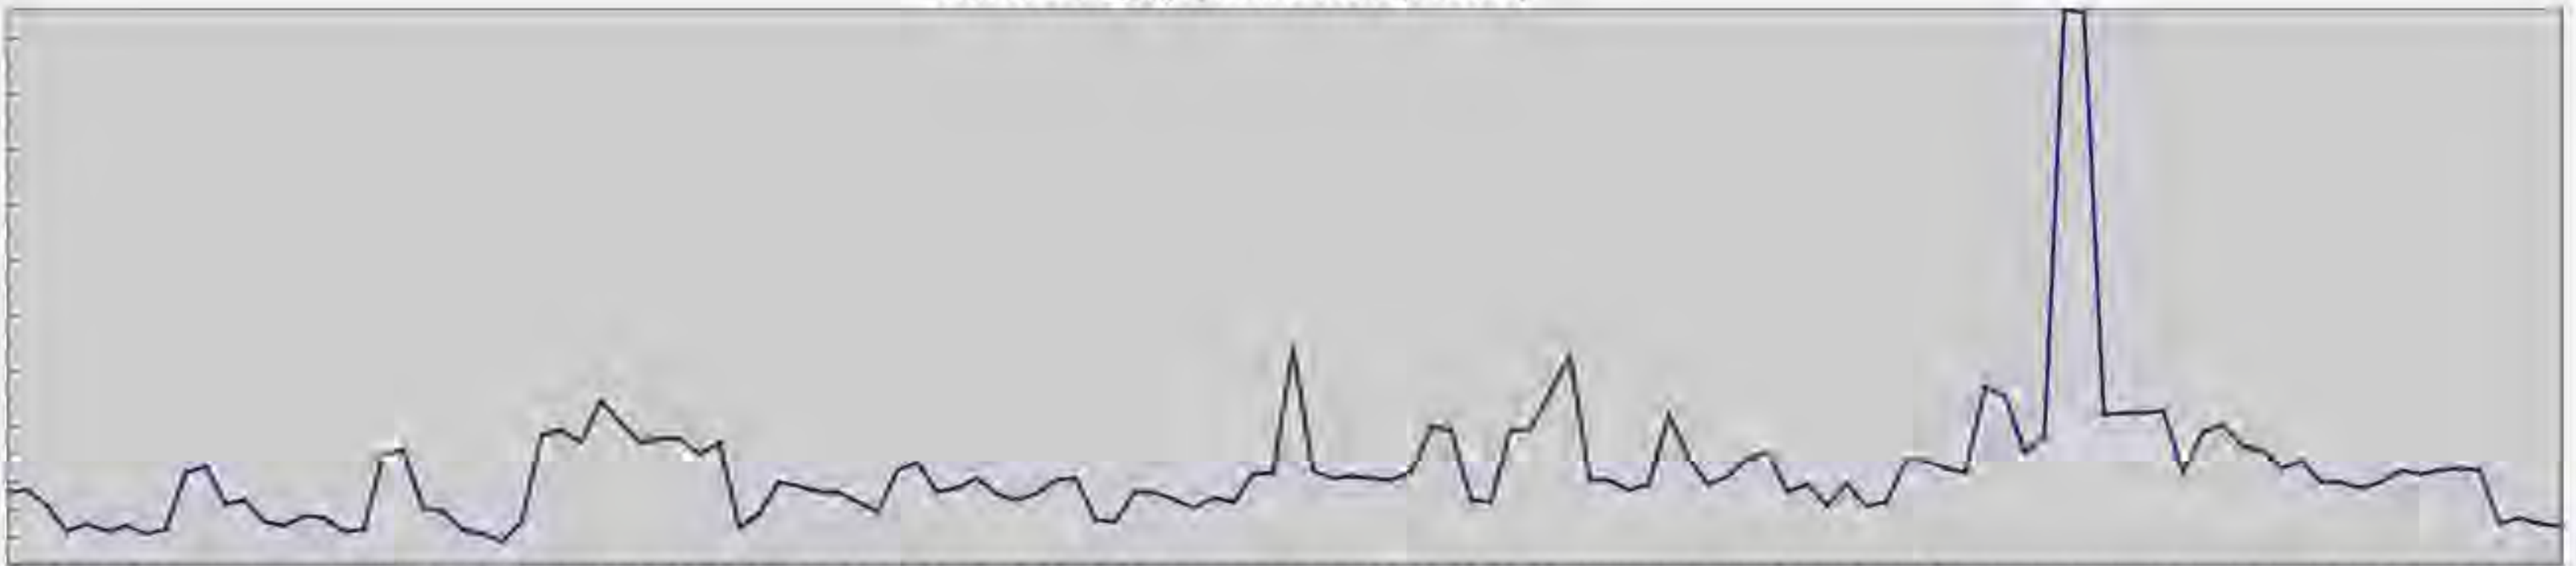

130-NALT GSM289411 CELL  
129-NALT GSM289410 CELL  
128-NALT GSM289409 CELL  
127-NALT GSM289408 CELL  
126-Color-d9 GSM1988105 CELL  
125-Color-d9 GSM1988104 CELL  
124-Color-d9 GSM1988103 CELL  
123-Color-d4 GSM1988102 CELL  
122-Color-d4 GSM1988101 CELL  
121-Intestine-large GSM258676 CELL  
120-Intestine-large GSM258675 CELL  
119-Intestine-small GSM258674 CELL  
118-Intestine-small GSM258673 CELL  
117-Lymph-nodes GSM258672 CELL  
116-Lymph-nodes GSM258671 CELL  
115-Spleen GSM258767 CELL  
114-Spleen GSM258766 CELL  
113-Neuro2a GSM258727 CELL  
112-Neuro2a GSM241898 CELL  
111-Astrocytes GSM241898 CELL  
110-ming GSM258726 CELL  
109-ming GSM258725 CELL  
108-MIMCD3 GSM258724 CELL  
107-MIMCD3 GSM258723 CELL  
106-Bruce4 GSM258665 CELL  
105-Bruce4 GSM258665 CELL  
104-C2C12 GSM258690 CELL  
103-C2C12 GSM258689 CELL  
102-NH3T3 GSM258730 CELL  
101-NH3T3 GSM258729 CELL  
100-3T3-L1 GSM258610 CELL  
99-3T3-L1 GSM258609 CELL  
98-10T12 GSM258632 CELL  
97-10T12 GSM258631 CELL  
96-Osteoblast-d21 GSM258740 CELL  
95-Osteoblast-d21 GSM258739 CELL  
94-Osteoblast-d14 GSM258738 CELL  
93-Osteoblast-d14 GSM258737 CELL  
92-Osteoblast-d5 GSM258742 CELL  
91-Osteoblast-d5 GSM258741 CELL  
90-Chondrocytes GSM266741 CELL  
89-Chondrocytes GSM266740 CELL  
88-Nat Helper cell GSM465594 CELL  
87-Nat Helper cell GSM465593 CELL  
86-TT cell GSM465596 CELL  
85-MS-1 GSM234692 CELL  
84-Lymph-endo-cells GSM143704 CELL  
83-PP-FDC GSM481977 CELL  
82-PP-FDC GSM481978 CELL  
81-PP-FDC GSM481976 CELL  
80-L-Y RMLNDCC003001 CELL  
79-L-Y RMLNDCC003001 CELL  
78-Follicular-Bcells GSM258664 CELL  
77-Follicular-Bcells GSM258663 CELL  
76-MZ-Bcell GSM258627 CELL  
75-MZ-Bcell GSM258627 CELL  
74-BAF3 GSM258620 CELL  
73-BAF3 GSM258619 CELL  
72-Tregs GSM258778 CELL  
71-Tregs GSM258777 CELL  
70-T-cells-CD8+ GSM258776 CELL  
69-T-cells-CD8+ GSM258774 CELL  
68-T-cells-CD4+ GSM258773 CELL  
67-T-cells-CD4+ GSM258744 CELL  
66-Thymocyte-DN GSM465595 CELL  
65-Osteoclasts GSM258743 CELL  
64-Microglia GSM258721 CELL  
63-Microglia GSM258721 CELL  
62-MM-LPS-7h GSM258706 CELL  
61-MM-LPS-7h GSM258706 CELL  
60-MM-LPS-7h GSM258705 CELL  
59-MM-LPS-6h GSM258702 CELL  
58-MM-LPS-6h GSM258702 CELL  
57-MM-LPS-6h GSM258699 CELL  
56-MM-LPS-6h GSM258699 CELL  
55-MM-LPS-6h GSM258699 CELL  
54-MM-LPS-6h GSM258699 CELL  
53-Iasmacryoid-DC GSM258650 CELL  
52-Iasmacryoid-DC GSM258649 CELL  
51-CD8a-DC GSM258648 CELL  
50-CD8a-DC GSM258647 CELL  
49-CD8a+DC GSM258646 CELL  
48-CD8a+DC GSM258646 CELL  
47-NK-cells GSM258732 CELL  
46-NK-cells GSM258731 CELL  
45-Mast-cells-IgE+Ad GSM258719 CELL  
44-Mast-cells-IgE+Ad GSM258717 CELL  
43-Mast-cells-IgE GSM258714 CELL  
42-Mast-cells-IgE GSM258713 CELL  
41-Mast-cells GSM258712 CELL  
40-Granulocytes GSM258668 CELL  
39-Granulocytes GSM258667 CELL  
38-GMP GSM258666 CELL  
37-GMP GSM258666 CELL  
36-GMP GSM258666 CELL  
35-GMP GSM258642 CELL  
34-MEP GSM258642 CELL  
33-MEP GSM258720 CELL  
32-MEP GSM258719 CELL  
31-HESC GSM258770 CELL  
30-HESC GSM258769 CELL  
29-Bone marrow GSM258628 CELL  
28-Bone marrow GSM258627 CELL  
27-paneth-cells-GE GSM116358 CELL  
26-paneth-cells-GE GSM116357 CELL  
25-paneth-cells GSM116350 CELL  
24-paneth-cells GSM116359 CELL  
23-paneth-cells GSM318589 CELL  
22-paneth-cells GSM318590 CELL  
21-Color-Crypt GSM480375 CELL  
20-Color-Crypt GSM480374 CELL  
19-Color-Vill GSM480363 CELL  
18-Color-Vill GSM480362 CELL  
17-Color-IEC-GE GSM349880 CELL  
16-Color-IEC-GE GSM350375 CELL  
15-Ileum-IEC GSM350376 CELL  
14-Ileum-IEC GSM350371 CELL  
13-Small-intestine-epithelium RMINEP002001 CELL  
12-Small-intestine-epithelium RMINEP001001 CELL  
11-FAE-RMPYEP002001 CELL  
10-FAE-RMPYEP001001 CELL  
09-Ileum-IEC GSM190797 CELL  
08-Ileum-IEC GSM190796 CELL  
07-Ileum-IEC GSM190795 CELL  
06-CT-v-M-cells GSM190794 CELL  
05-CT-v-M-cells GSM190793 CELL  
04-CT-v-M-cells GSM190792 CELL  
03-PP-M-cells GSM190791 CELL  
02-PP-M-cells GSM190790 CELL  
01-PP-M-cells GSM190789 CELL
