# Supplementary material for: Identification of Novel Genes Selectively Expressed in the Follicle-Associated Epithelium from the Meta-Analysis of Transcriptomics Data from Multiple Mouse Cell and Tissue Populations
Source: PubMed Central journal article supplement — DNA Res. 2012 Sep 18;19(5):407–22. doi: 10.1093/dnares/dss022 (PMC3473373; doi:10.1093/dnares/dss022), 2012-09-18

**Supplementary Figure 2.** Effect of RANKL-stimulation on the expression of FAE- and M cell-related genes in the villous epithelium. Heat maps showing the expression of equivalent probe sets of the genes represented in cluster 65 in samples from mucosal data sets (Peyer’s patch M cells, CT-stimulated villous epithelium, ileum epithelial cells, FAE, small intestine epithelium, ileum and NALT, left-hand panel) and RANKL-stimulated villous epithelium (right-hand panel). Each column represents the mean probe set intensity ( $\log_2$ ) for all samples from each source ( $n = 2-4$ ). Significant differences between groups were sought by ANOVA.  $P$  values for those genes which were significantly increased ( $P < 0.05$ ) in the villous epithelium ( $> 2.0$  fold) within 2 d of RANKL-treatment when compared to controls (unstimulated epithelium) are indicated.

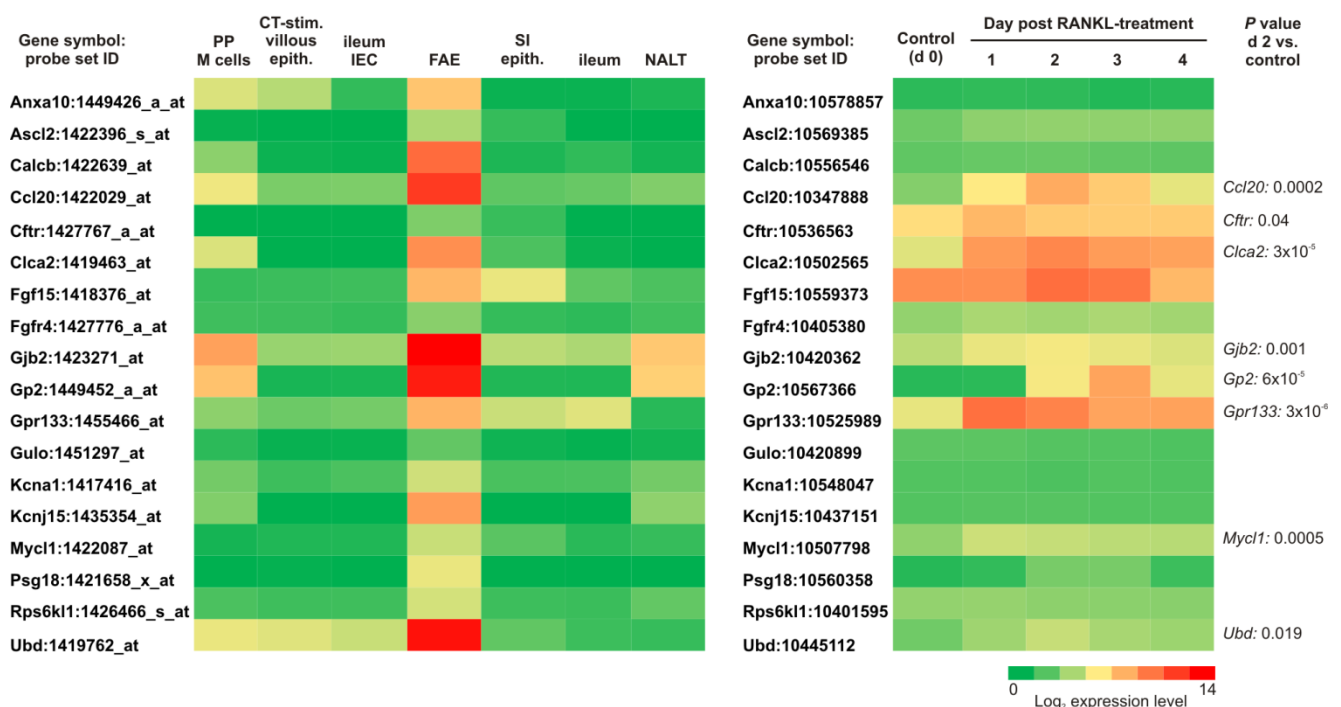

Supplement: supp_dss022_dss022supp_fig2.pdf [file supp_dss022_dss022supp_fig2.pdf]
