# Supplementary material for: Identification of Novel Genes Selectively Expressed in the Follicle-Associated Epithelium from the Meta-Analysis of Transcriptomics Data from Multiple Mouse Cell and Tissue Populations
Source: PubMed Central journal article supplement — DNA Res. 2012 Sep 18;19(5):407–22. doi: 10.1093/dnares/dss022 (PMC3473373; doi:10.1093/dnares/dss022), 2012-09-18
Supplement: supp_dss022_dss022supp_table1.pdf [file supp_dss022_dss022supp_table1.pdf]

**Supplementary Table S1.** The cellular identities and sources of data sets used in this study.

| <b>Sample no.<sup>a</sup></b> | <b>Abbreviation</b>        | <b>Description</b>                                  | <b>Cell/tissue-specific designation used in cluster profiles in Figures 2, 3 &amp; 4</b> | <b>Chip IDs</b>                       | <b>Reference</b> |
|-------------------------------|----------------------------|-----------------------------------------------------|------------------------------------------------------------------------------------------|---------------------------------------|------------------|
| 1-3                           | PP M cells                 | Peyer's patch M cells                               | M cells/FAE                                                                              | GSM190789,<br>GSM190790,<br>GSM190791 | 1                |
| 4-6                           | CT-stim.<br>Villous epith. | Cholera toxin-stimulated (CTi) villous epithelium   | Intestine-related                                                                        | GSM190792,<br>GSM190793,<br>GSM190794 | 1                |
| 7-9                           | Ileum IEC                  | Ileum intestinal epithelial cells                   | Intestine-related                                                                        | GSM190795,<br>GSM190796,<br>GSM190797 | 1                |
| 10,11                         | FAE                        | Follicle-associated epithelium from Peyer's patches | M cells/FAE                                                                              | RMPYEP001001,<br>RMPYEP002001         | 2,3              |
| 12,13                         | Small intestine epithelium | Small intestine epithelium                          | Intestine-related                                                                        | RMINEP001001,<br>RMINEP002001         | 2,3              |
| 14                            | Ileum IEC                  | Ileum intestinal epithelial cells-wild type         | Intestine-related                                                                        | GSM350371                             | 4                |
| 15                            | Ileum IEC-GF               | Ileum intestinal epithelial cells-germ free         | Intestine-related                                                                        | GSM350376                             | 4                |
| 16                            | Colon IEC                  | Colonic intestinal epithelial cells-wild type       | Intestine-related                                                                        | GSM350375                             | 4                |
| 17                            | Colon IEC-GF               | Colonic intestinal epithelial cells-germ free       | Intestine-related                                                                        | GSM349880                             | 4                |
| 18,19                         | Colon villi                | Colonic villi tips                                  | Intestine-related                                                                        | GSM489362,<br>GSM489363               | 5                |
| 20,21                         | Colon crypt                | Colonic villi crypts                                | Intestine-related                                                                        | GSM489374,<br>GSM489375               | 5                |
| 22,23                         | Paneth cells               | Paneth cells                                        | Intestine-related                                                                        | GSM318589,<br>GSM318590               | 6                |
| 24,25                         | Paneth cells               | Paneth-cells from conventionalized (d               | Intestine-related                                                                        | GSM116359.                            | 7                |

|       |                 |                                                                         |                                       |                                                                                 |   |
|-------|-----------------|-------------------------------------------------------------------------|---------------------------------------|---------------------------------------------------------------------------------|---|
|       |                 | 10) mice                                                                |                                       | GSM116360                                                                       |   |
| 26,27 | Paneth cells-GF | Paneth-cells from germ-free mice                                        | Intestine-related                     | GSM116357,<br>GSM116358                                                         | 7 |
| 28,29 | Bone marrow     | Bone marrow                                                             | BM prog.,<br>granulocytes, DC,<br>pDC | GSM258627,<br>GSM628628                                                         | 8 |
| 30,31 | HSC             | Haematopoietic stem cells                                               | BM prog.,<br>granulocytes, DC,<br>pDC | GSM258769,<br>GSM258770                                                         | 8 |
| 32,33 | MEP             | Mega erythroid progenitor cells                                         | BM prog.,<br>granulocytes, DC,<br>pDC | GSM258719,<br>GSM258720                                                         | 8 |
| 34,35 | CMP             | Common myeloid progenitor cells                                         | BM prog.,<br>granulocytes, DC,<br>pDC | GSM258641,<br>GSM258642                                                         | 8 |
| 36,37 | GMP             | Granulocyte/monocyte progenitor cells                                   | BM prog.,<br>granulocytes, DC,<br>pDC | GSM258665,<br>GSM258666                                                         | 8 |
| 38,39 | Granulocytes    | Purified CD11b <sup>+</sup> , Gr-1 <sup>+</sup> peripheral granulocytes | BM prog.,<br>granulocytes, DC,<br>pDC | GSM258667,<br>GSM258668                                                         | 8 |
| 40-45 | Mast cells      | Culture-derived bone marrow mast cells (control & treated with IgE+Ag)  | BM prog.,<br>granulocytes, DC,<br>pDC | GSM258711,<br>GSM258712,<br>GSM258713,<br>GSM258714,<br>GSM258717,<br>GSM258718 | 8 |
| 46,47 | NK cells        | NK1.1-positive natural killer cells                                     | BM prog.,<br>granulocytes, DC,<br>pDC | GSM258731,<br>GSM258732                                                         | 8 |
| 48,49 | CD8a+ DC        | CD8a <sup>+</sup> "lymphoid" classical dendritic cells                  | BM prog.,<br>granulocytes, DC,<br>pDC | GSM258645,<br>GSM258646                                                         | 8 |
| 50,51 | CD8a- DC        | CD8a <sup>-</sup> "myeloid" classical dendritic cells                   | BM prog.,<br>granulocytes, DC,<br>pDC | GSM258647,<br>GSM258648                                                         | 8 |
| 52,53 | Plasmacytoid DC | Plasmacytoid dendritic cells (B220 <sup>+</sup> )                       | BM prog.,<br>granulocytes, DC,<br>pDC | GSM258649,<br>GSM258650                                                         | 8 |
| 54,55 | BMM             | Bone marrow-derived macrophages                                         | Phagocytes                            | GSM258693,<br>GSM258694                                                         | 8 |

|       |                          |                                                                                  |                           |                                 |      |
|-------|--------------------------|----------------------------------------------------------------------------------|---------------------------|---------------------------------|------|
| 56,57 | BMM LPS-6h               | Bone marrow-derived macrophages 6 h after LPS stimulation                        | Phagocytes                | GSM258699, GSM258700            | 8    |
| 58,59 | PMM                      | Thioglycollate-elicited peritoneal macrophages                                   | Phagocytes                | GSM258701, GSM258702            | 8    |
| 60,61 | PMM LPS-7h               | Thioglycollate-elicited peritoneal macrophages 7 h after LPS stimulation         | Phagocytes                | GSM258705, GSM258706            | 8    |
| 62,63 | Microglia                | Microglial cells                                                                 | Phagocytes                | GSM258721, GSM258722            | 8    |
| 64,65 | Osteoclasts              | Osteoclasts, CSF-1 & RANKL-treated bone marrow cultures                          | Phagocytes                | GSM258743, GSM258744            | 8    |
| 66    | Thymocyte DN             | CD4 <sup>-</sup> CD8 <sup>+</sup> double-negative thymocytes                     | T cells, B cells          | GSM465595                       | 9    |
| 67,68 | T cells CD4 <sup>+</sup> | CD4 <sup>+</sup> T helper cells                                                  | T cells, B cells          | GSM258773, GSM258774            | 8    |
| 69,70 | T cells CD8 <sup>+</sup> | CD8 <sup>+</sup> cytotoxic T cells                                               | T cells, B cells          | GSM258775, GSM258776            | 8    |
| 71,72 | Tregs                    | Regulatory T cells                                                               | T cells, B cells          | GSM258777, GSM258778            | 8    |
| 73,74 | BAF3                     | Interleukin 3-dependent pro-B cell line                                          | T cells, B cells          | GSM258619, GSM258620            | 8    |
| 75,76 | MZ B cell                | Splenic marginal zone B cells                                                    | T cells, B cells          | GSM258621, GSM258622            | 8    |
| 77,78 | Follicular B cells       | Splenic follicular B cells                                                       | T cells, B cells          | GSM258663, GSM258664            | 8    |
| 79,80 | FL-Y                     | Lymphotoxin $\beta$ receptor signalling-dependent follicular dendritic cell line | FDC, Endo., LTi, NH cells | RMLNDC002001, RMLNDC003001      | 3,10 |
| 81-83 | PP FDC                   | Follicular dendritic cells enriched from Peyer's patches                         | FDC, Endo., LTi, NH cells | GSM481976, GSM481977, GSM481978 | 11   |
| 84    | Lymphendo cells          | Lymphatic endothelial cells                                                      | FDC, Endo., LTi, NH cells | GSM143704                       | 12   |

|         |              |                                                                                                                                                                      |                           |                       |    |
|---------|--------------|----------------------------------------------------------------------------------------------------------------------------------------------------------------------|---------------------------|-----------------------|----|
| 85      | MS-1         | Endothelial cells                                                                                                                                                    | FDC, Endo., LTi, NH cells | GSM234692             | 13 |
| 86      | LTi cell     | Lymphoid tissue-inducer cells from fetal liver                                                                                                                       | FDC, Endo., LTi, NH cells | GSM465596             | 9  |
| 87-88   | NH cell      | Natural helper cells, Lin <sup>c</sup> -Kit <sup>+</sup> Sca-1 <sup>+</sup> cells. Th2-type<br><br>innate lymphocytes prepared from fat-associated lymphoid clusters | FDC, Endo., LTi, NH cells | GSM465593, GSM465594  | 9  |
| 89,90   | Chondrocytes | Primary chondrocytes                                                                                                                                                 | Mesenchyme                | GSM226740, GSM266741, | 14 |
| 91,92   | OB 5 days    | Primary neonatal calvarial osteoblast 5 days after stimulation<br><br>with glycerophosphate and ascorbate                                                            | Mesenchyme                | GSM258741, GSM258742  | 8  |
| 93,94   | OB 14 days   | Osteoblast 14 days after stimulation                                                                                                                                 | Mesenchyme                | GSM258736, GSM258737  | 8  |
| 95,96   | OB 21 days   | Osteoblast 21 days after stimulation                                                                                                                                 | Mesenchyme                | GSM258739, GSM258740  | 8  |
| 97,98   | 10T1/2       | Embryonic mesenchymal multipotent osteoblast progenitor                                                                                                              | Mesenchyme                | GSM258631, GSM258632  | 8  |
| 99,100  | 3T3-L1       | Embryonic fibroblasts - adipocyte like                                                                                                                               | Mesenchyme                | GSM258609, GSM258610  | 8  |
| 101,102 | NIH3T3       | Embryonic fibroblasts                                                                                                                                                | Mesenchyme                | GSM258729, GSM258730  | 8  |
| 103,104 | C2C12        | Myoblast                                                                                                                                                             | Mesenchyme                | GSM258629, GSM258630  | 8  |
| 105,106 | Bruce4       | Embryonic stem cell                                                                                                                                                  | Mesenchyme                | GSM258655, GSM258656  | 8  |
| 107,108 | MIMCD3       | Renal inner medullary epithelial cell                                                                                                                                | Mesenchyme                | GSM258723, GSM258724  | 8  |

|         |                                                  |                                                                                                                                        |                     |                                                                                                                                             |         |
|---------|--------------------------------------------------|----------------------------------------------------------------------------------------------------------------------------------------|---------------------|---------------------------------------------------------------------------------------------------------------------------------------------|---------|
| 109,110 | min6                                             | Pancreatic beta cell, insulin secreting                                                                                                | Mesenchyme          | GSM258725, GSM258726                                                                                                                        | 8       |
| 111     | Astrocytes                                       | Astrocytes. FACS-sorted from transgenic mice that express enhanced green fluorescent protein under the control of an S100beta promoter | Mesenchyme          | GSM241898                                                                                                                                   | 15      |
| 112,113 | Neuro2a                                          | Neuroblastoma cells                                                                                                                    | Mesenchyme          | GSM258727, GSM258728                                                                                                                        | 8       |
| 114,115 | Spleen                                           | Splenocytes                                                                                                                            | Spleen, lymph nodes | GSM258767, GSM258768                                                                                                                        | 8       |
| 116,117 | Lymph nodes                                      | Lymph node cells                                                                                                                       | Spleen, lymph nodes | GSM258691, GSM258692                                                                                                                        | 8       |
| 118,119 | Intestine small                                  | Small intestine                                                                                                                        | Intestine-related   | GSM258677, GSM258678                                                                                                                        | 8       |
| 120,121 | Intestine large                                  | Large intestine                                                                                                                        | Intestine-related   | GSM258675, GSM258676                                                                                                                        | 8       |
| 122,123 | Colon-d4                                         | Distal colon, control d4                                                                                                               | Intestine-related   | GSM198101, GSM198102                                                                                                                        | GSE8025 |
| 124-126 | Colon-d9                                         | Distal colon, control d9                                                                                                               | Intestine-related   | GSM198103, GSM198104, GSM198105                                                                                                             | GSE8025 |
| 127-130 | NALT                                             | Nasal-associated lymphoid tissue                                                                                                       | NALT                | GSM289408, GSM289409, GSM289410, GSM289411                                                                                                  | 16      |
|         | RANKL-stimulated villous epithelium <sup>a</sup> | Villous epithelium at 0, 1, 2, 3 & 4 d after RANKL-treatment                                                                           |                     | RSM01709, RSM01710, RSM01711, RSM01712, RSM01713, RSM01714, RSM01715, RSM01716, RSM01717, RSM01718, RSM01719, RSM01720, RSM01724, RSM01725, | 17      |

|  |                                                                                     |                                                   |  |                         |          |
|--|-------------------------------------------------------------------------------------|---------------------------------------------------|--|-------------------------|----------|
|  |                                                                                     |                                                   |  | RSM01726                |          |
|  | <i>In vitro</i> cultivated RANKL-stimulated small intestinal organoids <sup>c</sup> | Small intestinal organoids treated with/out RANKL |  | GSM949492,<br>GSM949493 | GSE38785 |

All samples were analysed on Affymetrix mouse genome MOE430 2.0 expression arrays unless indicated otherwise.

<sup>a</sup>, Samples listed in order of presentation from left to right on the cluster profiles.

<sup>b</sup>, Performed on Affymetrix mouse gene 1.0 ST expression arrays.

<sup>c</sup>, Performed on Agilent 4x44K whole mouse genome expression arrays.

## References

1. Terahara, K., Yoshida, M., Igarashi, O., et al. 2008, Comprehensive gene expression profiling of Peyer's patch M cells, villous M-like cells, and intestinal epithelial cells. *J. Immunol.*, **180**, 7840-7846.
2. Nakato, G., Fukuda, S., Hase, K., Goitsuka, R., Cooper, M. D. and Ohno, H. 2009, New approach for M-cell-specific molecules by screening comprehensive transcriptome analysis. *DNA Res.*, **16**, 227-235.
3. Hijikata, A., Kitamura, H., Kimura, Y., et al. 2007, Construction of an open-access database that integrates cross-reference information from the transcriptome and proteome of immune cells. *Bioinformatics*, **23**, 2934-2941.
4. Kotarsky, K., Stitnik, K. M., Stenstad, H., et al. 2010, A novel role for constitutively expressed epithelial-derived chemokines as antibacterial peptides in the mucosa. *Mucosal Immunol.*, **3**, 40-48.
5. Patel, V. N., Bebek, G., Mariadason, J. M., Wang, D., Augenlicht, L. H. and Chance, M. R. 2010, Prediction and testing of biological networks underlying intestinal cancer. *PLoS One*, **5**, e12497.
6. Cadwell, K., Liu, J. Y., Brown, S. L., et al. 2008, A key role for autophagy and the autophagy gene Atg16l1 in mouse and human intestinal Paneth cells. *Nature*, **456**, 259-263.
7. Cash, H. L., Whitham, C. V., Behrendt, C. L. and Hooper, L. V. 2006, Symbiotic bacteria direct expression of an intestinal bactericidal lectin. *Science*, **313**, 1126-1130.
8. Lattin, J. E., Schroder, K., Su, A. I., et al. 2008, Expression analysis of G protein-coupled receptors in mouse macrophages. *Immunome Research*, **5**, 5.

9. Moro, K., Yamada, T., Tanabe, M., et al. 2010, Innate production of TH2 cytokines by adipose tissue-associated c-Kit<sup>+</sup> Sca-1<sup>+</sup> lymphoid cells. *Nature*, **463**, 540-544.
10. Nishikawa, Y., Hikida, M., Magari, M., et al. 2006, Establishment of lymphotoxin b receptor signaling-dependent cell lines with follicular dendritic cell phenotypes from mouse lymph nodes. *J. Immunol.*, **177**, 5204-5214.
11. Suzuki, K., Maruya, M., Kawamoto, H., et al. 2010, The sensing of environmental stimuli by follicular dendritic cells promotes immunoglobulin A generation in the gut. *Immunity*, **33**, 71-83.
12. Johnson, L. A., Clasper, S., Holt, A. P., Lalor, P. F., Baban, D. and Jackson, D. G. 2006, An inflammation-induced mechanism for leukocyte transmigration across lymphatic vessel endothelium. *J. Exp. Med.*, **203**, 2763-2777.
13. Ledgerwood, L. G., Lal, G., Zhang, N., et al. 2008, The sphingosine 1-phosphate receptor 1 causes tissue retention by inhibiting the entry of peripheral tissue T lymphocytes into afferent lymphatics. *Nat. Immunol.*, **9**, 42-53.
14. Fukada, T., Civic, N., Furuichi, T., et al. 2008, The zinc transporter SLC39A13/ZIP13 is required for connective tissue development; its involvement in BMP/TGF-beta signaling pathways. *PLoS One*, **3**, e3642.
15. Cahoy, J. D., Emery, B., Kaushal, A., et al. 2008, A transcriptome database for astrocytes, neurons, and oligodendrocytes: a new resource for understanding brain development and function. *J. Neurosci.*, **28**, 264-278.
16. Hyland, K. A., Brennan, R., Olmsted, S. B., et al. 2009, The early interferon response of nasal-associated lymphoid tissue to *Streptococcus pyogenes* infection. *FACS Immunol. Med. Microbiol.*, **55**, 422-431.
17. Kanaya, T., Hase, K., Takahashi, D., et al. 2012, The Ets transcription factor Spi-B is essential for the differentiation of intestinal microfold cells. *Nat. Immunol.*, **in press**.
