# Supplementary material for: Identification of Novel Genes Selectively Expressed in the Follicle-Associated Epithelium from the Meta-Analysis of Transcriptomics Data from Multiple Mouse Cell and Tissue Populations
Source: PubMed Central journal article supplement — DNA Res. 2012 Sep 18;19(5):407–22. doi: 10.1093/dnares/dss022 (PMC3473373; doi:10.1093/dnares/dss022), 2012-09-18
Supplement: supp_dss022_dss022supp_table2.pdf [file supp_dss022_dss022supp_table2.pdf]

| Cluster number           | Description                                              |
|--------------------------|----------------------------------------------------------|
| <b>Intestine-related</b> |                                                          |
| 2                        | Small-intestine-related                                  |
| 3                        | Paneth cell-related                                      |
| 9                        | Low in some Paneth cells                                 |
| 10                       | Small and large intestine-related                        |
| 15                       | Large intestine-related                                  |
| 17                       | Small and large intestine-related                        |
| 18                       | Low in some Paneth cells                                 |
| 25                       | Low in some Paneth cells                                 |
| 34                       | Low in some Paneth cells                                 |
| 36                       | Intestine-related                                        |
| 40                       | Low in some Paneth cells                                 |
| 49                       | Intestine-related                                        |
| 55                       | Intestinal chemosensory- and neuroendocrine cell-related |
| 57                       | High in colonic villi                                    |
| 59                       | Large intestine-related                                  |
| 62                       | Low in some Paneth cells                                 |
| 65                       | FAE- and Peyer's patch M cell-related                    |
| 70                       | Intestine-related                                        |
| 71                       | High in caecum                                           |
| 74                       | Large intestine-related                                  |
| 80                       | Paneth cell-related                                      |
| 84                       | Intestine-related                                        |
| 88                       | Low in some Paneth cells                                 |
| 89                       | Low in some Paneth cells                                 |
| 90                       | Low in some Paneth cells                                 |
| 95                       | Intestine-related                                        |
| 98                       | Paneth cell-related                                      |
| 101                      | Intestine-related                                        |
| 105                      | Low in Paneth cells                                      |
| 111                      | Large intestine and NALT-related                         |
| 116                      | Intestine-related                                        |
| 117                      | High in some Paneth cells                                |
| 118                      | Paneth cell-related                                      |
| 119                      | Low in some Paneth cells                                 |
| 121                      | Large intestine-related                                  |
| 124                      | Intestine-related                                        |
| 134                      | Intestine-related                                        |
| 140                      | Intestine-related                                        |
| 145                      | Intestine-related                                        |
| 146                      | High in colonic IEC                                      |
| 148                      | Intestine-related                                        |
| 150                      | Low in Paneth cells                                      |
| 151                      | Intestine-related                                        |
| 156                      | Low in Paneth cells                                      |
| 166                      | Large intestine-related                                  |
| 170                      | Paneth cell-related                                      |
| 181                      | Small intestine-related                                  |
| 182                      | Intestine-related                                        |

|     |                                   |
|-----|-----------------------------------|
| 187 | Intestine-related                 |
| 189 | Intestine-related                 |
| 192 | Intestine-related                 |
| 193 | Intestine-related                 |
| 197 | Small intestine-related           |
| 203 | Intestine-related                 |
| 204 | Low in Paneth cells               |
| 211 | Intestine-related                 |
| 219 | Intestine-related                 |
| 229 | High in Paneth cells              |
| 231 | Intestine-related                 |
| 232 | Intestine-related                 |
| 242 | Small intestine epithelium        |
| 245 | Intestine-related                 |
| 248 | High in colon IEC                 |
| 253 | Intestine-related                 |
| 276 | Intestine-related                 |
| 286 | Intestine-related                 |
| 294 | High in Paneth cells and NH cells |
| 301 | Intestine-related                 |
| 304 | Intestine-related                 |
| 306 | Intestine-related                 |
| 310 | Small intestine-related           |
| 312 | High in IEC                       |
| 313 | Large intestine-related           |
| 317 | Intestine-related                 |
| 322 | Anitmicrobial peptides            |
| 328 | Intestine-related                 |
| 333 | Intestine-related                 |
| 335 | Small intestine-related           |
| 338 | Intestine-related                 |
| 346 | Intestine and NALT-related        |

#### **Bone marrow progenitor-related**

|     |                                                |
|-----|------------------------------------------------|
| 14  | High in bone marrow                            |
| 127 | High in bone marrow progenitors                |
| 139 | High in MEP                                    |
| 255 | High in bone marrow progenitors and mast cells |

#### **Classical DC and plasmacytoid DC-related**

|     |                                          |
|-----|------------------------------------------|
| 45  | Plasmacytoid DC-related                  |
| 61  | High in CD8+ DC                          |
| 163 | High in CD8a+ cDC                        |
| 168 | High in classical DC                     |
| 186 | High in classical DC and plasmacytoid DC |
| 194 | High in plasmacytoid DC and B cells      |
| 258 | High in plasmacytoid DC                  |
| 259 | High in classical DC                     |

#### **Granulocyte-related**

|     |                                       |
|-----|---------------------------------------|
| 23  | Mast cell-related                     |
| 27  | Mast cell-related                     |
| 35  | High in some granulocytes             |
| 39  | Mast cell-related                     |
| 42  | NK cell-related                       |
| 43  | Granulocyte-related                   |
| 83  | High in NK cells, T cells and B cells |
| 108 | High in NK cells                      |
| 110 | High in NK cells and lymphocytes      |
| 123 | High in granulocytes                  |
| 125 | High in mast cells and BAF3 cells     |
| 175 | Mast cells and phagocyte-related      |
| 183 | High in NK cells and T cells          |
| 184 | High in NK cells, T cells and B cells |
| 272 | High in mast cells and phagocytes     |
| 290 | High in mast cells and NH cells       |
| 326 | High in mast cells                    |

### **Phagocytes**

|     |                                       |
|-----|---------------------------------------|
| 11  | Phagocyte-related                     |
| 24  | Phagocyte-related                     |
| 32  | Phagocyte-related                     |
| 72  | Phagocyte-related/ antigen processing |
| 81  | Phagocyte-related                     |
| 82  | Proteolysis-related                   |
| 120 | Phagocyte-related                     |
| 126 | High in osteoclasts                   |
| 132 | Phagocyte-related                     |
| 138 | Phagocyte-related                     |
| 154 | Phagocyte-related                     |
| 160 | Phagocyte-related                     |
| 175 | Mast cells and phagocyte-related      |
| 185 | Phagocyte-related                     |
| 207 | Phagocyte-related                     |
| 210 | Phagocyte-related                     |
| 243 | Phagocyte-related                     |
| 272 | High in mast cells and phagocytes     |
| 273 | Phagocyte-related                     |
| 278 | High in phagocytes                    |
| 282 | High in microglia                     |
| 284 | Phagocyte-related                     |
| 324 | Phagocyte-related                     |
| 340 | Phagocyte-related                     |

### **T cells and B cells**

|    |                                                      |
|----|------------------------------------------------------|
| 22 | B cell-related                                       |
| 31 | T cell-related                                       |
| 41 | High in BAF3 interleukin 3-dependent pro-B cell line |
| 48 | Thymocyte-related                                    |
| 56 | High in B cells                                      |

|     |                                       |
|-----|---------------------------------------|
| 73  | High in B and T cells                 |
| 83  | High in NK cells, T cells and B cells |
| 104 | T cell-related                        |
| 106 | Immunoglobulin-related                |
| 143 | High in T cells and B cells           |
| 183 | High in NK cells and T cells          |
| 184 | High in NK cells, T cells and B cells |
| 194 | High in plasmacytoid DC and B cells   |
| 238 | High in B cells                       |
| 265 | High in T cells and NH cells          |
| 320 | High in B cells and NH cells          |
| 343 | CD8+ T cells-related                  |
| 344 | Regulatory T cells-related            |

#### **MHC class II**

|     |              |
|-----|--------------|
| 144 | MHC class II |
|-----|--------------|

#### **Haematopoietic cells**

|     |                                                      |
|-----|------------------------------------------------------|
| 58  | High in haematopoietic cells                         |
| 75  | High in haematopoietic cells                         |
| 85  | High in haematopoietic cells                         |
| 99  | High in haematopoietic cells                         |
| 128 | High in all haematopoietic cells                     |
| 149 | High in NK cells, cDC, T cells, B cells and NH cells |
| 161 | High in haematopoietic cells                         |
| 169 | High in NK cell, cDC, T cells and B cells            |
| 303 | High in NK cells, T cells, LTi cells and NH cells    |
| 327 | High in haematopoietic cells                         |

#### **FDC**

|     |                                            |
|-----|--------------------------------------------|
| 28  | High in Peyer's patch FDC                  |
| 109 | High in FL-Y cells                         |
| 153 | High in Peyer's patches FDC                |
| 159 | High in Peyer's patches FDC                |
| 318 | High in Peyer's patches FDC                |
| 323 | High in astrocytes and Peyer's patches FDC |

#### **Lymphatic endothelial cells**

|     |                                                  |
|-----|--------------------------------------------------|
| 29  | Lymphatic endothelium-related                    |
| 38  | Lymphatic endothelium-related                    |
| 173 | High in endothelial cells                        |
| 348 | High in lymphatic endothelial cells and NH cells |

#### **Lymphoid tissue inducer cells**

|     |                                                   |
|-----|---------------------------------------------------|
| 78  | Lymphoid tissue inducer cell-related              |
| 303 | High in NK cells, T cells, LTi cells and NH cells |

#### **Natural helper cells**

|     |                                                      |
|-----|------------------------------------------------------|
| 20  | Natural helper cell-related                          |
| 149 | High in NK cells, cDC, T cells, B cells and NH cells |

|     |                                                   |
|-----|---------------------------------------------------|
| 265 | High in T cells and NH cells                      |
| 279 | High in NH cells and min6 cells                   |
| 303 | High in NK cells, T cells, LTi cells and NH cells |
| 320 | High in B cells and NH cells                      |
| 348 | High in lymphatic endothelial cells and NH cells  |

#### **Mesenchymal cells/Extracellular matrix-related**

|     |                                                        |
|-----|--------------------------------------------------------|
| 1   | Astrocyte-related                                      |
| 4   | High in MIN-6-Pancreatic beta cell, insulin secreting  |
| 7   | High in Neuro2A cells                                  |
| 8   | High in differentiating osteoblasts                    |
| 12  | High in Bruce 4 embryonic stem cells                   |
| 13  | Mesenchyme-related/extracellular matrix                |
| 26  | High in Min 6 & Neuro2A cells                          |
| 33  | High in Min6, astrocytes & Neuro2A cells               |
| 37  | High in MIMCD3 renal inner medullary epithelial cell   |
| 46  | Chondrocyte & osteoblast-related                       |
| 51  | Extracellular matrix-related                           |
| 60  | High in NIH3T3 embryonic fibroblasts & C2C12 myoblasts |
| 64  | Extracellular matrix-related                           |
| 67  | Chondrocyte and osteoblast-related                     |
| 68  | High in NIH3T3 embryonic fibroblasts                   |
| 69  | Osteoblast-related                                     |
| 92  | Mesenchyme-related                                     |
| 94  | High in astrocytes & Neuro2A cells                     |
| 100 | High in astrocytes & NALT                              |
| 107 | High in 3T3L1 cells                                    |
| 122 | High in astrocytes and osteoblasts                     |
| 141 | High in min6 cells and NALT                            |
| 155 | Mesenchyme-related/extracellular matrix                |
| 158 | High in 10T12 cells                                    |
| 165 | Mesenchyme-related/extracellular matrix                |
| 171 | High in 10T12 and 3T3L1 cells                          |
| 180 | High in Bruce4 cells                                   |
| 191 | High in Bruce4 and min6 cells                          |
| 196 | Mesenchyme-related/extracellular matrix                |
| 209 | High in osteoblasts, NIH3T3 and min6 cells             |
| 213 | Mesenchyme-related/extracellular matrix                |
| 220 | Extracellular matrix                                   |
| 246 | High in mesenchymal cells                              |
| 247 | High in astrocytes                                     |
| 256 | Mesenchyme-related/extracellular matrix                |
| 257 | Mesenchyme-related/extracellular matrix                |
| 279 | High in NH cells and min6 cells                        |
| 297 | Mesenchyme-related/extracellular matrix                |
| 300 | High in MS1, min6 and neuro2A cells                    |
| 315 | High in osteoblasts                                    |
| 316 | High in 10T12 cells and astrocytes                     |
| 323 | High in astrocytes and Peyer's patches FDC             |
| 325 | Mesenchyme-related/extracellular matrix                |

|     |                                         |
|-----|-----------------------------------------|
| 329 | Mesenchyme-related/extracellular matrix |
| 332 | Mesenchyme-related/extracellular matrix |
| 336 | Mesenchyme-related/extracellular matrix |
| 341 | Mesenchyme-related/extracellular matrix |
| 349 | High in Bruce4 cells                    |

### **Lymphoid tissues**

|     |                             |
|-----|-----------------------------|
| 5   | High in NALT                |
| 63  | Lymph node-related          |
| 96  | High in NALT                |
| 100 | High in astrocytes & NALT   |
| 112 | High in NALT                |
| 141 | High in min6 cells and NALT |
| 152 | Low in NALT                 |
| 270 | High in spleen              |

### **House keeping genes**

|     |                             |
|-----|-----------------------------|
| 6   | House keeping-cell cycle    |
| 16  | House keeping-Ribosomal     |
| 19  | House keeping-cell cycle    |
| 21  | House keeping-cell cycle    |
| 50  | House keeping-mitochondrion |
| 54  | House keeping-nucleus       |
| 66  | House keeping-cell cycle    |
| 76  | House keeping-cell cycle    |
| 77  | House keeping-nucleus       |
| 79  | House keeping-mitochondrion |
| 87  | House keeping-cell cycle    |
| 91  | House keeping               |
| 97  | House keeping-transcription |
| 115 | House keeping-cell cycle    |
| 131 | House keeping-transcription |
| 133 | House keeping-transcription |
| 147 | House keeping               |
| 157 | House keeping-transcription |
| 164 | House keeping-nucleus       |
| 172 | House keeping-transcription |
| 177 | House keeping               |
| 188 | House keeping               |
| 195 | House keeping               |
| 201 | House keeping-nucleus       |
| 202 | House keeping               |
| 205 | House keeping-transcription |
| 212 | House keeping-cell cycle    |
| 216 | House keeping-ribosomal     |
| 217 | House keeping               |
| 222 | House keeping-nucleus       |
| 224 | House keeping-transcription |
| 226 | House keeping               |
| 234 | House keeping-cell cycle    |

|     |                          |
|-----|--------------------------|
| 237 | House keeping            |
| 261 | House keeping            |
| 266 | House keeping-cell cycle |
| 268 | House keeping-cell cycle |
| 285 | House keeping-cell cycle |
| 287 | House keeping            |
| 289 | House keeping            |
| 293 | House keeping            |
| 296 | House keeping            |
| 311 | House keeping-cell cycle |
| 321 | House keeping            |
| 334 | House keeping            |
| 339 | House keeping            |

**Affymetrix control probe sets**

|    |                               |
|----|-------------------------------|
| 86 | Affymetrix control probe sets |
|----|-------------------------------|

**Uncertain**

|     |                       |
|-----|-----------------------|
| 30  | Uncertain             |
| 44  | Low in many           |
| 47  | Low in many           |
| 52  | Uncertain             |
| 53  | Uncertain             |
| 93  | Uncertain             |
| 102 | Uncertain             |
| 103 | Uncertain             |
| 113 | Uncertain             |
| 114 | Uncertain             |
| 129 | Uncertain             |
| 130 | Uncertain             |
| 135 | Uncertain             |
| 136 | Uncertain             |
| 137 | Uncertain             |
| 142 | Low in many           |
| 162 | Uncertain             |
| 167 | Uncertain             |
| 174 | Uncertain-low in many |
| 176 | Uncertain-low in many |
| 178 | Uncertain-low in many |
| 179 | Uncertain-low in many |
| 182 | Uncertain             |
| 190 | Uncertain-low in many |
| 198 | Uncertain-low in many |
| 199 | Uncertain             |
| 200 | Uncertain             |
| 206 | Uncertain-low in many |
| 208 | Uncertain-low in many |
| 214 | Uncertain-low in many |
| 215 | Uncertain             |
| 218 | Uncertain             |

|     |                       |
|-----|-----------------------|
| 221 | Uncertain             |
| 223 | Uncertain             |
| 225 | Uncertain             |
| 227 | Uncertain-low in many |
| 228 | Uncertain             |
| 230 | Uncertain             |
| 233 | Uncertain-low in many |
| 235 | Uncertain             |
| 236 | Uncertain-low in many |
| 239 | Uncertain-low in many |
| 240 | Uncertain-low in many |
| 241 | Uncertain-low in many |
| 244 | Uncertain-low in many |
| 249 | Uncertain-low in many |
| 250 | Uncertain             |
| 251 | Uncertain             |
| 252 | Uncertain-low in many |
| 254 | Uncertain-low in many |
| 260 | Uncertain-low in many |
| 262 | Uncertain             |
| 263 | Uncertain             |
| 264 | Uncertain             |
| 267 | Uncertain-low in many |
| 269 | Uncertain-low in many |
| 271 | Uncertain             |
| 274 | Uncertain             |
| 275 | Uncertain             |
| 277 | Uncertain             |
| 280 | Uncertain             |
| 281 | Uncertain             |
| 283 | Uncertain-low in many |
| 288 | Uncertain-low in many |
| 291 | Uncertain-low in many |
| 292 | Uncertain-low in many |
| 295 | Uncertain             |
| 298 | Uncertain             |
| 299 | Uncertain             |
| 302 | Uncertain-low in many |
| 305 | Uncertain             |
| 307 | Uncertain             |
| 308 | Uncertain-low in many |
| 309 | Uncertain-low in many |
| 314 | Uncertain             |
| 319 | Uncertain             |
| 330 | Uncertain             |
| 331 | Uncertain-low in many |
| 337 | Uncertain             |
| 342 | Uncertain-low in many |
| 345 | Uncertain             |
| 347 | Uncertain-low in many |
