# Supplementary material for: Identification of Novel Genes Selectively Expressed in the Follicle-Associated Epithelium from the Meta-Analysis of Transcriptomics Data from Multiple Mouse Cell and Tissue Populations
Source: PubMed Central journal article supplement — DNA Res. 2012 Sep 18;19(5):407–22. doi: 10.1093/dnares/dss022 (PMC3473373; doi:10.1093/dnares/dss022), 2012-09-18
Supplement: supp_dss022_dss022supp_table3.pdf [file supp_dss022_dss022supp_table3.pdf]

| Probe Set ID | Gene Symbol                      | Gene Title                                                                                     | Cluster ID                    |
|--------------|----------------------------------|------------------------------------------------------------------------------------------------|-------------------------------|
| 1433821_at   | 1110012D08Rik                    | RIKEN cDNA 1110012D08 gene                                                                     | Cluster0001_Astrocyte-related |
| 1428922_at   | 1200009O22Rik                    | RIKEN cDNA 1200009O22 gene                                                                     | Cluster0001_Astrocyte-related |
| 1452961_at   | 1200009O22Rik                    | RIKEN cDNA 1200009O22 gene                                                                     | Cluster0001_Astrocyte-related |
| 1452827_at   | 1500009C09Rik                    | RIKEN cDNA 1500009C09 gene                                                                     | Cluster0001_Astrocyte-related |
| 1429647_at   | 1700027L20Rik                    | RIKEN cDNA 1700027L20 gene                                                                     | Cluster0001_Astrocyte-related |
| 1449239_at   | 1700045I19Rik                    | ring finger protein 138 pseudogene                                                             | Cluster0001_Astrocyte-related |
| 1428809_at   | 1810010H24Rik                    | RIKEN cDNA 1810010H24 gene                                                                     | Cluster0001_Astrocyte-related |
| 1424694_at   | 2010011I20Rik                    | RIKEN cDNA 2010011I20 gene                                                                     | Cluster0001_Astrocyte-related |
| 1435678_at   | 2610017I09Rik                    | RIKEN cDNA 2610017I09 gene                                                                     | Cluster0001_Astrocyte-related |
| 1425408_a_at | 2610034M16Rik                    | RIKEN cDNA 2610034M16 gene                                                                     | Cluster0001_Astrocyte-related |
| 1452979_at   | 2610110G12Rik                    | RIKEN cDNA 2610110G12 gene                                                                     | Cluster0001_Astrocyte-related |
| 1458702_at   | 2610316D01Rik                    | RIKEN cDNA 2610316D01 gene                                                                     | Cluster0001_Astrocyte-related |
| 1453645_at   | 2700046A07Rik                    | RIKEN cDNA 2700046A07 gene                                                                     | Cluster0001_Astrocyte-related |
| 1428866_at   | 2810037O22Rik                    | RIKEN cDNA 2810037O22 gene                                                                     | Cluster0001_Astrocyte-related |
| 1431614_at   | 2810049E08Rik                    | RIKEN cDNA 2810049E08 gene                                                                     | Cluster0001_Astrocyte-related |
| 1429096_at   | 2810455D13Rik                    | RIKEN cDNA 2810455D13 gene                                                                     | Cluster0001_Astrocyte-related |
| 1432813_at   | 2900064F13Rik                    | RIKEN cDNA 2900064F13 gene                                                                     | Cluster0001_Astrocyte-related |
| 1436135_at   | 2900075N08Rik /// Nlgn3          | RIKEN cDNA 2900075N08 gene /// neuroligin 3                                                    | Cluster0001_Astrocyte-related |
| 1429857_at   | 2900092D14Rik                    | RIKEN cDNA 2900092D14 gene                                                                     | Cluster0001_Astrocyte-related |
| 1429185_at   | 4631416L12Rik                    | RIKEN cDNA 4631416L12 gene                                                                     | Cluster0001_Astrocyte-related |
| 1453303_at   | 4833417J20Rik                    | RIKEN cDNA 4833417J20 gene                                                                     | Cluster0001_Astrocyte-related |
| 1434925_at   | 4833424O15Rik                    | RIKEN cDNA 4833424O15 gene                                                                     | Cluster0001_Astrocyte-related |
| 1438667_at   | 5730410E15Rik                    | RIKEN cDNA 5730410E15 gene                                                                     | Cluster0001_Astrocyte-related |
| 1426766_at   | 6330403K07Rik                    | RIKEN cDNA 6330403K07 gene                                                                     | Cluster0001_Astrocyte-related |
| 1430101_at   | 6330406O05Rik /// Gabrg3         | RIKEN cDNA 6330406O05 gene /// gamma-aminobutyric acid (GABA) A receptor, subunit gamma 3      | Cluster0001_Astrocyte-related |
| 1453529_at   | 6330418B08Rik                    | RIKEN cDNA 6330418B08 gene                                                                     | Cluster0001_Astrocyte-related |
| 1437640_at   | 6430704M03Rik                    | RIKEN cDNA 6430704M03 gene                                                                     | Cluster0001_Astrocyte-related |
| 1436340_at   | 6430704M03Rik /// 9630041G16Rik  | RIKEN cDNA 6430704M03 gene /// RIKEN cDNA 9630041G16 gene                                      | Cluster0001_Astrocyte-related |
| 1451679_at   | 6530401D17Rik                    | RIKEN cDNA 6530401D17 gene                                                                     | Cluster0001_Astrocyte-related |
| 1435624_at   | 9030409G11Rik                    | RIKEN cDNA 9030409G11 gene                                                                     | Cluster0001_Astrocyte-related |
| 1434719_at   | A2m /// LOC677369                | alpha-2-macroglobulin /// hypothetical protein LOC677369                                       | Cluster0001_Astrocyte-related |
| 1441491_at   | A330068G13Rik                    | RIKEN cDNA A330068G13 gene                                                                     | Cluster0001_Astrocyte-related |
| 1439894_at   | A730056I06Rik                    | RIKEN cDNA A730056I06 gene                                                                     | Cluster0001_Astrocyte-related |
| 1444007_at   | A830082K12Rik                    | RIKEN cDNA A830082K12 gene                                                                     | Cluster0001_Astrocyte-related |
| 1437076_at   | A930017M01Rik                    | RIKEN cDNA A930017M01 gene                                                                     | Cluster0001_Astrocyte-related |
| 1422997_s_at | Acot1 /// Acot2 /// LOC100044830 | acyl-CoA thioesterase 1 /// acyl-CoA thioesterase 2 /// similar to acyl-CoA thioesterase       | Cluster0001_Astrocyte-related |
| 1449065_at   | Acot1 /// LOC100044830           | acyl-CoA thioesterase 1 /// similar to acyl-CoA thioesterase                                   | Cluster0001_Astrocyte-related |
| 1422428_at   | Acsbg1                           | acyl-CoA synthetase bubblegum family member 1                                                  | Cluster0001_Astrocyte-related |
| 1437031_at   | AcsI6                            | acyl-CoA synthetase long-chain family member 6                                                 | Cluster0001_Astrocyte-related |
| 1451257_at   | AcsI6                            | acyl-CoA synthetase long-chain family member 6                                                 | Cluster0001_Astrocyte-related |
| 1456901_at   | Adamts20                         | a disintegrin-like and metallopeptidase (reprolysin type) with thrombospondin type 1 motif, 20 | Cluster0001_Astrocyte-related |
| 1455462_at   | Adcy2                            | adenylate cyclase 2                                                                            | Cluster0001_Astrocyte-related |
| 1418754_at   | Adcy8                            | adenylate cyclase 8                                                                            | Cluster0001_Astrocyte-related |
| 1429022_at   | Adcyap1r1                        | adenylate cyclase activating polypeptide 1 receptor 1                                          | Cluster0001_Astrocyte-related |
| 1424392_at   | Adhfe1                           | alcohol dehydrogenase, iron containing, 1                                                      | Cluster0001_Astrocyte-related |
| 1424393_s_at | Adhfe1                           | alcohol dehydrogenase, iron containing, 1                                                      | Cluster0001_Astrocyte-related |
| 1435495_at   | Adora1                           | adenosine A1 receptor                                                                          | Cluster0001_Astrocyte-related |
| 1435417_at   | AI464131                         | expressed sequence AI464131                                                                    | Cluster0001_Astrocyte-related |
| 1434730_at   | AI854517                         | expressed sequence AI854517                                                                    | Cluster0001_Astrocyte-related |
| 1431923_at   | Aifm3                            | apoptosis-inducing factor, mitochondrion-associated 3                                          | Cluster0001_Astrocyte-related |
| 1434742_s_at | Aifm3                            | apoptosis-inducing factor, mitochondrion-associated 3                                          | Cluster0001_Astrocyte-related |
| 1455703_at   | Akt2 /// LOC100048123            | thymoma viral proto-oncogene 2 /// similar to serine/threonine kinase                          | Cluster0001_Astrocyte-related |
| 1424401_at   | Aldh1l1                          | aldehyde dehydrogenase 1 family, member L1                                                     | Cluster0001_Astrocyte-related |
| 1453065_at   | Aldh5a1                          | aldehyde dehydrogenase family 5, subfamily A1                                                  | Cluster0001_Astrocyte-related |
| 1424714_at   | Aldoc                            | aldolase C, fructose-bisphosphate                                                              | Cluster0001_Astrocyte-related |
| 1451461_a_at | Aldoc                            | aldolase C, fructose-bisphosphate                                                              | Cluster0001_Astrocyte-related |

|              |                       |                                                                                                |                               |
|--------------|-----------------------|------------------------------------------------------------------------------------------------|-------------------------------|
| 1429015_at   | Ankzf1                | ankyrin repeat and zinc finger domain containing 1                                             | Cluster0001_Astrocyte-related |
| 1427288_at   | Apba2                 | amyloid beta (A4) precursor protein-binding, family A, member 2                                | Cluster0001_Astrocyte-related |
| 1455231_s_at | Apc2                  | adenomatosis polyposis coli 2                                                                  | Cluster0001_Astrocyte-related |
| 1418382_at   | Apcdd1                | adenomatosis polyposis coli down-regulated 1                                                   | Cluster0001_Astrocyte-related |
| 1418383_at   | Apcdd1                | adenomatosis polyposis coli down-regulated 1                                                   | Cluster0001_Astrocyte-related |
| 1449070_x_at | Apcdd1                | adenomatosis polyposis coli down-regulated 1                                                   | Cluster0001_Astrocyte-related |
| 1454822_x_at | Apcdd1                | adenomatosis polyposis coli down-regulated 1                                                   | Cluster0001_Astrocyte-related |
| 1435033_at   | Arhgef4               | Rho guanine nucleotide exchange factor (GEF) 4                                                 | Cluster0001_Astrocyte-related |
| 1424248_at   | Arpp21                | cyclic AMP-regulated phosphoprotein, 21                                                        | Cluster0001_Astrocyte-related |
| 1450042_at   | Arx /// LOC100044440  | aristaless related homeobox /// similar to Arx homeoprotein                                    | Cluster0001_Astrocyte-related |
| 1437086_at   | Ascl1                 | achaete-scute complex homolog 1 (Drosophila)                                                   | Cluster0001_Astrocyte-related |
| 1424395_at   | Asrgl1                | asparaginase like 1                                                                            | Cluster0001_Astrocyte-related |
| 1443960_at   | Asrgl1                | asparaginase like 1                                                                            | Cluster0001_Astrocyte-related |
| 1418615_at   | Astn1                 | astrotactin 1                                                                                  | Cluster0001_Astrocyte-related |
| 1438707_at   | Atp13a4 /// LOC637970 | ATPase type 13A4 /// similar to type V P-type ATPase isoform 4                                 | Cluster0001_Astrocyte-related |
| 1427465_at   | Atp1a2                | ATPase, Na <sup>+</sup> /K <sup>+</sup> transporting, alpha 2 polypeptide                      | Cluster0001_Astrocyte-related |
| 1434893_at   | Atp1a2                | ATPase, Na <sup>+</sup> /K <sup>+</sup> transporting, alpha 2 polypeptide                      | Cluster0001_Astrocyte-related |
| 1443823_s_at | Atp1a2                | ATPase, Na <sup>+</sup> /K <sup>+</sup> transporting, alpha 2 polypeptide                      | Cluster0001_Astrocyte-related |
| 1452308_a_at | Atp1a2                | ATPase, Na <sup>+</sup> /K <sup>+</sup> transporting, alpha 2 polypeptide                      | Cluster0001_Astrocyte-related |
| 1455136_at   | Atp1a2                | ATPase, Na <sup>+</sup> /K <sup>+</sup> transporting, alpha 2 polypeptide                      | Cluster0001_Astrocyte-related |
| 1435148_at   | Atp1b2                | ATPase, Na <sup>+</sup> /K <sup>+</sup> transporting, beta 2 polypeptide                       | Cluster0001_Astrocyte-related |
| 1436642_x_at | AW047730              | expressed sequence AW047730                                                                    | Cluster0001_Astrocyte-related |
| 1436432_at   | B230343J05Rik         | RIKEN cDNA B230343J05 gene                                                                     | Cluster0001_Astrocyte-related |
| 1455234_at   | B3gal1                | UDP-Gal:betaGlcNAc beta 1,3-galactosyltransferase, polypeptide 1                               | Cluster0001_Astrocyte-related |
| 1460509_at   | B3gal1                | UDP-Gal:betaGlcNAc beta 1,3-galactosyltransferase, polypeptide 1                               | Cluster0001_Astrocyte-related |
| 1454821_at   | B3gat1                | beta-1,3-glucuronyltransferase 1 (glucuronosyltransferase P)                                   | Cluster0001_Astrocyte-related |
| 1426329_s_at | Baalc                 | brain and acute leukemia, cytoplasmic                                                          | Cluster0001_Astrocyte-related |
| 1436878_at   | Baalc                 | brain and acute leukemia, cytoplasmic                                                          | Cluster0001_Astrocyte-related |
| 1455363_at   | Bai1                  | brain-specific angiogenesis inhibitor 1                                                        | Cluster0001_Astrocyte-related |
| 1435558_at   | Bai2 /// LOC100048816 | brain-specific angiogenesis inhibitor 2 /// similar to Brain-specific angiogenesis inhibitor 2 | Cluster0001_Astrocyte-related |
| 1454782_at   | Bai3                  | brain-specific angiogenesis inhibitor 3                                                        | Cluster0001_Astrocyte-related |
| 1456908_at   | BC023202              | cDNA sequence BC023202                                                                         | Cluster0001_Astrocyte-related |
| 1416718_at   | Bcan                  | brevican                                                                                       | Cluster0001_Astrocyte-related |
| 1441899_x_at | Bcan                  | brevican                                                                                       | Cluster0001_Astrocyte-related |
| 1437312_at   | Bmpr1b                | bone morphogenetic protein receptor, type 1B                                                   | Cluster0001_Astrocyte-related |
| 1443720_s_at | Bmpr1b                | bone morphogenetic protein receptor, type 1B                                                   | Cluster0001_Astrocyte-related |
| 1428303_at   | Btbd17                | BTB (POZ) domain containing 17                                                                 | Cluster0001_Astrocyte-related |
| 1435095_at   | C030009O12Rik         | RIKEN cDNA C030009O12 gene                                                                     | Cluster0001_Astrocyte-related |
| 1435179_at   | C130071C03Rik         | RIKEN cDNA C130071C03 gene                                                                     | Cluster0001_Astrocyte-related |
| 1453791_at   | C130071C03Rik         | RIKEN cDNA C130071C03 gene                                                                     | Cluster0001_Astrocyte-related |
| 1419225_at   | Cacna2d3              | calcium channel, voltage-dependent, alpha2/delta subunit 3                                     | Cluster0001_Astrocyte-related |
| 1450975_at   | Cacng4                | calcium channel, voltage-dependent, gamma subunit 4                                            | Cluster0001_Astrocyte-related |
| 1434785_at   | Cacng5                | calcium channel, voltage-dependent, gamma subunit 5                                            | Cluster0001_Astrocyte-related |
| 1429211_at   | Cadm2                 | cell adhesion molecule 2                                                                       | Cluster0001_Astrocyte-related |
| 1435145_at   | Cadm2                 | cell adhesion molecule 2                                                                       | Cluster0001_Astrocyte-related |
| 1435146_s_at | Cadm2                 | cell adhesion molecule 2                                                                       | Cluster0001_Astrocyte-related |
| 1435147_x_at | Cadm2                 | cell adhesion molecule 2                                                                       | Cluster0001_Astrocyte-related |
| 1436743_at   | Cadm2                 | cell adhesion molecule 2                                                                       | Cluster0001_Astrocyte-related |
| 1439048_at   | Cadm2                 | cell adhesion molecule 2                                                                       | Cluster0001_Astrocyte-related |
| 1455397_at   | Caskin1               | CASK interacting protein 1                                                                     | Cluster0001_Astrocyte-related |
| 1424699_at   | Ccdc136               | coiled-coil domain containing 136                                                              | Cluster0001_Astrocyte-related |
| 1437967_at   | Ccdc141               | coiled-coil domain containing 141                                                              | Cluster0001_Astrocyte-related |
| 1427157_at   | Ccdc85a               | coiled-coil domain containing 85A                                                              | Cluster0001_Astrocyte-related |
| 1452332_at   | Ccdc85a               | coiled-coil domain containing 85A                                                              | Cluster0001_Astrocyte-related |
| 1425092_at   | Cdh10                 | cadherin 10                                                                                    | Cluster0001_Astrocyte-related |
| 1446399_at   | Cdh10                 | cadherin 10                                                                                    | Cluster0001_Astrocyte-related |
| 1460538_at   | Cdh10                 | cadherin 10                                                                                    | Cluster0001_Astrocyte-related |

|              |                         |                                                                                                    |                               |
|--------------|-------------------------|----------------------------------------------------------------------------------------------------|-------------------------------|
| 1450312_at   | Cdh20                   | cadherin 20                                                                                        | Cluster0001_Astrocyte-related |
| 1440958_at   | Chadl                   | chondroadherin-like                                                                                | Cluster0001_Astrocyte-related |
| 1417795_at   | Chl1                    | cell adhesion molecule with homology to L1CAM                                                      | Cluster0001_Astrocyte-related |
| 1435190_at   | Chl1                    | cell adhesion molecule with homology to L1CAM                                                      | Cluster0001_Astrocyte-related |
| 1426620_at   | Chst10                  | carbohydrate sulfotransferase 10                                                                   | Cluster0001_Astrocyte-related |
| 1429798_s_at | Cmtm5                   | CKLF-like MARVEL transmembrane domain containing 5                                                 | Cluster0001_Astrocyte-related |
| 1430600_at   | Cmtm5                   | CKLF-like MARVEL transmembrane domain containing 5                                                 | Cluster0001_Astrocyte-related |
| 1422798_at   | Cntnap2                 | contactin associated protein-like 2                                                                | Cluster0001_Astrocyte-related |
| 1427123_s_at | Copg2as2                | coatamer protein complex, subunit gamma 2, antisense 2                                             | Cluster0001_Astrocyte-related |
| 1427320_at   | Copg2as2                | coatamer protein complex, subunit gamma 2, antisense 2                                             | Cluster0001_Astrocyte-related |
| 1434952_at   | Cox4nb                  | COX4 neighbor                                                                                      | Cluster0001_Astrocyte-related |
| 1416776_at   | Crym                    | crystallin, mu                                                                                     | Cluster0001_Astrocyte-related |
| 1423845_at   | Csdc2                   | cold shock domain containing C2, RNA binding                                                       | Cluster0001_Astrocyte-related |
| 1451147_x_at | Csdc2                   | cold shock domain containing C2, RNA binding                                                       | Cluster0001_Astrocyte-related |
| 1450713_at   | Cspg5                   | chondroitin sulfate proteoglycan 5                                                                 | Cluster0001_Astrocyte-related |
| 1448895_a_at | Ctnna2                  | catenin (cadherin associated protein), alpha 2                                                     | Cluster0001_Astrocyte-related |
| 1417567_at   | Ctnnbip1                | catenin beta interacting protein 1                                                                 | Cluster0001_Astrocyte-related |
| 1422592_at   | Ctnnd2 /// LOC100045979 | catenin (cadherin associated protein), delta 2 /// similar to arm-repeat protein NPRAP/neurojungin | Cluster0001_Astrocyte-related |
| 1456116_at   | Ctnnd2 /// LOC100045979 | catenin (cadherin associated protein), delta 2 /// similar to arm-repeat protein NPRAP/neurojungin | Cluster0001_Astrocyte-related |
| 1435435_at   | Cttnbp2                 | cortactin binding protein 2                                                                        | Cluster0001_Astrocyte-related |
| 1460604_at   | Cybrd1                  | cytochrome b reductase 1                                                                           | Cluster0001_Astrocyte-related |
| 1424677_at   | Cyp2j9                  | cytochrome P450, family 2, subfamily j, polypeptide 9                                              | Cluster0001_Astrocyte-related |
| 1449316_at   | Cyp4f15                 | cytochrome P450, family 4, subfamily f, polypeptide 15                                             | Cluster0001_Astrocyte-related |
| 1443205_at   | D5Buc30e                | DNA segment, Chr 5, Bucan 30 expressed                                                             | Cluster0001_Astrocyte-related |
| 1440116_at   | D630045J12Rik           | RIKEN cDNA D630045J12 gene                                                                         | Cluster0001_Astrocyte-related |
| 1430247_at   | Daam2                   | dishevelled associated activator of morphogenesis 2                                                | Cluster0001_Astrocyte-related |
| 1455717_s_at | Daam2                   | dishevelled associated activator of morphogenesis 2                                                | Cluster0001_Astrocyte-related |
| 1419903_at   | Dbndd2                  | dysbindin (dystrobrevin binding protein 1) domain containing 2                                     | Cluster0001_Astrocyte-related |
| 1443525_at   | Dbx2                    | developing brain homeobox 2                                                                        | Cluster0001_Astrocyte-related |
| 1440487_at   | Dcc                     | deleted in colorectal carcinoma                                                                    | Cluster0001_Astrocyte-related |
| 1441572_at   | Dcc                     | deleted in colorectal carcinoma                                                                    | Cluster0001_Astrocyte-related |
| 1428222_at   | Dclk2                   | doublecortin-like kinase 2                                                                         | Cluster0001_Astrocyte-related |
| 1455361_at   | Dgkb                    | diacylglycerol kinase, beta                                                                        | Cluster0001_Astrocyte-related |
| 1457027_at   | Dhtkd1                  | dehydrogenase E1 and transketolase domain containing 1                                             | Cluster0001_Astrocyte-related |
| 1429105_at   | Dlgap1                  | discs, large (Drosophila) homolog-associated protein 1                                             | Cluster0001_Astrocyte-related |
| 1436076_at   | Dlgap1                  | discs, large (Drosophila) homolog-associated protein 1                                             | Cluster0001_Astrocyte-related |
| 1453027_at   | Dlgap1                  | discs, large (Drosophila) homolog-associated protein 1                                             | Cluster0001_Astrocyte-related |
| 1434863_at   | Dnajc18                 | DnaJ (Hsp40) homolog, subfamily C, member 18                                                       | Cluster0001_Astrocyte-related |
| 1423671_at   | Dner                    | delta/notch-like EGF-related receptor                                                              | Cluster0001_Astrocyte-related |
| 1456379_x_at | Dner                    | delta/notch-like EGF-related receptor                                                              | Cluster0001_Astrocyte-related |
| 1455468_at   | Dpy19l3                 | dpy-19-like 3 (C. elegans)                                                                         | Cluster0001_Astrocyte-related |
| 1418298_s_at | Dpysl4                  | dihydropyrimidinase-like 4                                                                         | Cluster0001_Astrocyte-related |
| 1418299_at   | Dpysl4                  | dihydropyrimidinase-like 4                                                                         | Cluster0001_Astrocyte-related |
| 1440452_at   | Drp2                    | dystrophin related protein 2                                                                       | Cluster0001_Astrocyte-related |
| 1419223_a_at | Dtna                    | dystrobrevin alpha                                                                                 | Cluster0001_Astrocyte-related |
| 1425292_at   | Dtna                    | dystrobrevin alpha                                                                                 | Cluster0001_Astrocyte-related |
| 1426066_a_at | Dtna                    | dystrobrevin alpha                                                                                 | Cluster0001_Astrocyte-related |
| 1427588_a_at | Dtna                    | dystrobrevin alpha                                                                                 | Cluster0001_Astrocyte-related |
| 1429768_at   | Dtna                    | dystrobrevin alpha                                                                                 | Cluster0001_Astrocyte-related |
| 1456069_at   | Dtna                    | dystrobrevin alpha                                                                                 | Cluster0001_Astrocyte-related |
| 1435765_at   | E130114P18Rik           | RIKEN cDNA E130114P18 gene                                                                         | Cluster0001_Astrocyte-related |
| 1434297_at   | E130304F04Rik           | RIKEN cDNA E130304F04 gene                                                                         | Cluster0001_Astrocyte-related |
| 1434723_at   | E130307A14Rik           | RIKEN cDNA E130307A14 gene                                                                         | Cluster0001_Astrocyte-related |
| 1435044_at   | Ebf4                    | early B-cell factor 4                                                                              | Cluster0001_Astrocyte-related |
| 1423594_a_at | Ednrb                   | endothelin receptor type B                                                                         | Cluster0001_Astrocyte-related |
| 1426314_at   | Ednrb                   | endothelin receptor type B                                                                         | Cluster0001_Astrocyte-related |
| 1437347_at   | Ednrb                   | endothelin receptor type B                                                                         | Cluster0001_Astrocyte-related |

|              |                       |                                                                                         |                               |
|--------------|-----------------------|-----------------------------------------------------------------------------------------|-------------------------------|
| 1423085_at   | Efnb3                 | ephrin B3                                                                               | Cluster0001_Astrocyte-related |
| 1416444_at   | Elovl2                | elongation of very long chain fatty acids (FEN1/Elo2, SUR4/Elo3, yeast)-like 2          | Cluster0001_Astrocyte-related |
| 1449581_at   | Emid1                 | EMI domain containing 1                                                                 | Cluster0001_Astrocyte-related |
| 1418259_a_at | Entpd2                | ectonucleoside triphosphate diphosphohydrolase 2                                        | Cluster0001_Astrocyte-related |
| 1439284_at   | Epb4.115              | erythrocyte protein band 4.1-like 5                                                     | Cluster0001_Astrocyte-related |
| 1435286_at   | Epha5                 | Eph receptor A5                                                                         | Cluster0001_Astrocyte-related |
| 1437920_at   | Epha5                 | Eph receptor A5                                                                         | Cluster0001_Astrocyte-related |
| 1444690_at   | Epha5                 | Eph receptor A5                                                                         | Cluster0001_Astrocyte-related |
| 1455188_at   | Ephb1                 | Eph receptor B1                                                                         | Cluster0001_Astrocyte-related |
| 1450779_at   | Fabp7                 | fatty acid binding protein 7, brain                                                     | Cluster0001_Astrocyte-related |
| 1419031_at   | Fads2                 | fatty acid desaturase 2                                                                 | Cluster0001_Astrocyte-related |
| 1443838_x_at | Fads2                 | fatty acid desaturase 2                                                                 | Cluster0001_Astrocyte-related |
| 1434202_a_at | Fam107a               | family with sequence similarity 107, member A                                           | Cluster0001_Astrocyte-related |
| 1434203_at   | Fam107a               | family with sequence similarity 107, member A                                           | Cluster0001_Astrocyte-related |
| 1436685_at   | Fam181a               | family with sequence similarity 181, member A                                           | Cluster0001_Astrocyte-related |
| 1417862_at   | Fam181b               | family with sequence similarity 181, member B                                           | Cluster0001_Astrocyte-related |
| 1442800_x_at | Fam181b               | family with sequence similarity 181, member B                                           | Cluster0001_Astrocyte-related |
| 1435130_at   | Fam18a                | family with sequence similarity 18, member A                                            | Cluster0001_Astrocyte-related |
| 1419489_at   | Fam19a5               | family with sequence similarity 19, member A5                                           | Cluster0001_Astrocyte-related |
| 1439570_at   | Fam59b                | family with sequence similarity 59, member B                                            | Cluster0001_Astrocyte-related |
| 1431354_a_at | Fars2                 | phenylalanine-tRNA synthetase 2 (mitochondrial)                                         | Cluster0001_Astrocyte-related |
| 1428403_at   | Fbrsl1                | fibrosin-like 1                                                                         | Cluster0001_Astrocyte-related |
| 1427004_at   | Fbxo2                 | F-box protein 2                                                                         | Cluster0001_Astrocyte-related |
| 1454674_at   | Fez1                  | fasciculation and elongation protein zeta 1 (zygin I)                                   | Cluster0001_Astrocyte-related |
| 1418790_at   | Fezf2                 | Fez family zinc finger 2                                                                | Cluster0001_Astrocyte-related |
| 1440270_at   | Fgf12                 | fibroblast growth factor 12                                                             | Cluster0001_Astrocyte-related |
| 1453006_at   | Fgfbp3                | fibroblast growth factor binding protein 3                                              | Cluster0001_Astrocyte-related |
| 1421841_at   | Fgfr3                 | fibroblast growth factor receptor 3                                                     | Cluster0001_Astrocyte-related |
| 1422733_at   | Fjx1                  | four jointed box 1 (Drosophila)                                                         | Cluster0001_Astrocyte-related |
| 1450728_at   | Fjx1                  | four jointed box 1 (Drosophila)                                                         | Cluster0001_Astrocyte-related |
| 1450064_at   | Fmn2 /// LOC100044570 | formin 2 /// similar to formin-2                                                        | Cluster0001_Astrocyte-related |
| 1417429_at   | Fmo1                  | flavin containing monooxygenase 1                                                       | Cluster0001_Astrocyte-related |
| 1449012_s_at | Fndc4                 | fibronectin type III domain containing 4                                                | Cluster0001_Astrocyte-related |
| 1450154_at   | Folh1                 | folate hydrolase                                                                        | Cluster0001_Astrocyte-related |
| 1457038_at   | Frem2                 | Fras1 related extracellular matrix protein 2                                            | Cluster0001_Astrocyte-related |
| 1439904_at   | Fstl5                 | follicle-stimulating-like 5                                                             | Cluster0001_Astrocyte-related |
| 1417343_at   | Fxyd6                 | FXYD domain-containing ion transport regulator 6                                        | Cluster0001_Astrocyte-related |
| 1434788_at   | Fzd3                  | frizzled homolog 3 (Drosophila)                                                         | Cluster0001_Astrocyte-related |
| 1422051_a_at | Gabbr1                | gamma-aminobutyric acid (GABA) B receptor, 1                                            | Cluster0001_Astrocyte-related |
| 1455021_at   | Gabbr1                | gamma-aminobutyric acid (GABA) B receptor, 1                                            | Cluster0001_Astrocyte-related |
| 1421738_at   | Gabra2                | gamma-aminobutyric acid (GABA) A receptor, subunit alpha 2                              | Cluster0001_Astrocyte-related |
| 1443865_at   | Gabra2                | gamma-aminobutyric acid (GABA) A receptor, subunit alpha 2                              | Cluster0001_Astrocyte-related |
| 1455444_at   | Gabra2                | gamma-aminobutyric acid (GABA) A receptor, subunit alpha 2                              | Cluster0001_Astrocyte-related |
| 1419719_at   | Gabbr1                | gamma-aminobutyric acid (GABA) A receptor, subunit beta 1                               | Cluster0001_Astrocyte-related |
| 1427227_at   | Gabrg1                | gamma-aminobutyric acid (GABA) A receptor, subunit gamma 1                              | Cluster0001_Astrocyte-related |
| 1460408_at   | Gabrg1                | gamma-aminobutyric acid (GABA) A receptor, subunit gamma 1                              | Cluster0001_Astrocyte-related |
| 1416760_at   | Galnt1                | UDP-N-acetyl-alpha-D-galactosamine:polypeptide N-acetylgalactosaminyltransferase-like 1 | Cluster0001_Astrocyte-related |
| 1416900_s_at | Gdf1 /// Lass1        | growth differentiation factor 1 /// LAG1 homolog, ceramide synthase 1                   | Cluster0001_Astrocyte-related |
| 1426508_at   | Gfap                  | glial fibrillary acidic protein                                                         | Cluster0001_Astrocyte-related |
| 1426509_s_at | Gfap                  | glial fibrillary acidic protein                                                         | Cluster0001_Astrocyte-related |
| 1440142_s_at | Gfap                  | glial fibrillary acidic protein                                                         | Cluster0001_Astrocyte-related |
| 1448397_at   | Gjlb6                 | gap junction protein, beta 6                                                            | Cluster0001_Astrocyte-related |
| 1416049_at   | Gldc                  | glycine decarboxylase                                                                   | Cluster0001_Astrocyte-related |
| 1437930_at   | Glt25d2               | glycosyltransferase 25 domain containing 2                                              | Cluster0001_Astrocyte-related |
| 1457215_at   | Gm13111               | predicted gene 13111                                                                    | Cluster0001_Astrocyte-related |
| 1436115_at   | Gm266                 | predicted gene 266                                                                      | Cluster0001_Astrocyte-related |
| 1438132_at   | Gm5089                | predicted gene 5089                                                                     | Cluster0001_Astrocyte-related |

|              |                      |                                                                                           |                               |
|--------------|----------------------|-------------------------------------------------------------------------------------------|-------------------------------|
| 1445503_at   | Gm715                | predicted gene 715                                                                        | Cluster0001_Astrocyte-related |
| 1419499_at   | Gpam                 | glycerol-3-phosphate acyltransferase, mitochondrial                                       | Cluster0001_Astrocyte-related |
| 1457536_at   | Gpc5                 | glypican 5                                                                                | Cluster0001_Astrocyte-related |
| 1418050_at   | Gpld1                | glycosylphosphatidylinositol specific phospholipase D1                                    | Cluster0001_Astrocyte-related |
| 1426442_at   | Gpm6a                | glycoprotein m6a                                                                          | Cluster0001_Astrocyte-related |
| 1456741_s_at | Gpm6a                | glycoprotein m6a                                                                          | Cluster0001_Astrocyte-related |
| 1423091_a_at | Gpm6b                | glycoprotein m6b                                                                          | Cluster0001_Astrocyte-related |
| 1425942_a_at | Gpm6b                | glycoprotein m6b                                                                          | Cluster0001_Astrocyte-related |
| 1453514_at   | Gpm6b                | glycoprotein m6b                                                                          | Cluster0001_Astrocyte-related |
| 1459750_s_at | Gpr123               | G protein-coupled receptor 123                                                            | Cluster0001_Astrocyte-related |
| 1457229_at   | Gpr173               | G-protein coupled receptor 173                                                            | Cluster0001_Astrocyte-related |
| 1421756_a_at | Gpr19                | G protein-coupled receptor 19                                                             | Cluster0001_Astrocyte-related |
| 1450875_at   | Gpr37                | G protein-coupled receptor 37                                                             | Cluster0001_Astrocyte-related |
| 1424146_at   | Gpr37l1              | G protein-coupled receptor 37-like 1                                                      | Cluster0001_Astrocyte-related |
| 1421118_a_at | Gpr56                | G protein-coupled receptor 56                                                             | Cluster0001_Astrocyte-related |
| 1433485_x_at | Gpr56                | G protein-coupled receptor 56                                                             | Cluster0001_Astrocyte-related |
| 1451411_at   | Gprc5b               | G protein-coupled receptor, family C, group 5, member B                                   | Cluster0001_Astrocyte-related |
| 1421970_a_at | Gria2                | glutamate receptor, ionotropic, AMPA2 (alpha 2)                                           | Cluster0001_Astrocyte-related |
| 1434146_at   | Gria2                | glutamate receptor, ionotropic, AMPA2 (alpha 2)                                           | Cluster0001_Astrocyte-related |
| 1441499_at   | Grid1                | glutamate receptor, ionotropic, delta 1                                                   | Cluster0001_Astrocyte-related |
| 1421436_at   | Grid2                | glutamate receptor, ionotropic, delta 2                                                   | Cluster0001_Astrocyte-related |
| 1435487_at   | Grid2                | glutamate receptor, ionotropic, delta 2                                                   | Cluster0001_Astrocyte-related |
| 1430136_at   | Grm3                 | glutamate receptor, metabotropic 3                                                        | Cluster0001_Astrocyte-related |
| 1455272_at   | Grm5                 | glutamate receptor, metabotropic 5                                                        | Cluster0001_Astrocyte-related |
| 1456119_at   | Grm5                 | glutamate receptor, metabotropic 5                                                        | Cluster0001_Astrocyte-related |
| 1436013_at   | Gsg1l                | GSG1-like                                                                                 | Cluster0001_Astrocyte-related |
| 1436596_at   | H2afv                | H2A histone family, member V                                                              | Cluster0001_Astrocyte-related |
| 1431152_at   | Hapln3               | hyaluronan and proteoglycan link protein 3                                                | Cluster0001_Astrocyte-related |
| 1429023_at   | Hepacam              | hepatocyte cell adhesion molecule                                                         | Cluster0001_Astrocyte-related |
| 1434727_at   | Hepacam              | hepatocyte cell adhesion molecule                                                         | Cluster0001_Astrocyte-related |
| 1423146_at   | Hes5                 | hairly and enhancer of split 5 (Drosophila)                                               | Cluster0001_Astrocyte-related |
| 1456010_x_at | Hes5                 | hairly and enhancer of split 5 (Drosophila)                                               | Cluster0001_Astrocyte-related |
| 1415999_at   | Hey1                 | hairly/enhancer-of-split related with YRPW motif 1                                        | Cluster0001_Astrocyte-related |
| 1418106_at   | Hey2                 | hairly/enhancer-of-split related with YRPW motif 2                                        | Cluster0001_Astrocyte-related |
| 1419302_at   | Heyl                 | hairly/enhancer-of-split related with YRPW motif-like                                     | Cluster0001_Astrocyte-related |
| 1423259_at   | Id4 /// LOC100045546 | inhibitor of DNA binding 4 /// similar to Id4                                             | Cluster0001_Astrocyte-related |
| 1460607_at   | Igsf11               | immunoglobulin superfamily, member 11                                                     | Cluster0001_Astrocyte-related |
| 1433950_at   | Igsf21               | immunoglobulin superfamily, member 21                                                     | Cluster0001_Astrocyte-related |
| 1429893_at   | Il17rd               | interleukin 17 receptor D                                                                 | Cluster0001_Astrocyte-related |
| 1453373_at   | Il1rapl1             | interleukin 1 receptor accessory protein-like 1                                           | Cluster0001_Astrocyte-related |
| 1436894_at   | Ildr2                | immunoglobulin-like domain containing receptor 2                                          | Cluster0001_Astrocyte-related |
| 1449123_at   | Itih3                | inter-alpha trypsin inhibitor, heavy chain 3                                              | Cluster0001_Astrocyte-related |
| 1436579_s_at | Itsn1                | intersectin 1 (SH3 domain protein 1A)                                                     | Cluster0001_Astrocyte-related |
| 1456954_at   | Kcna6                | potassium voltage-gated channel, shaker-related, subfamily, member 6                      | Cluster0001_Astrocyte-related |
| 1425090_s_at | Kcnc4                | potassium voltage gated channel, Shaw-related subfamily, member 4                         | Cluster0001_Astrocyte-related |
| 1422834_at   | Kcnd2                | potassium voltage-gated channel, Shal-related family, member 2                            | Cluster0001_Astrocyte-related |
| 1422835_at   | Kcnd2                | potassium voltage-gated channel, Shal-related family, member 2                            | Cluster0001_Astrocyte-related |
| 1450773_at   | Kcnd2                | potassium voltage-gated channel, Shal-related family, member 2                            | Cluster0001_Astrocyte-related |
| 1435720_at   | Kcnd3                | potassium voltage-gated channel, Shal-related family, member 3                            | Cluster0001_Astrocyte-related |
| 1416640_at   | Kcne1l               | potassium voltage-gated channel, Isk-related family, member 1-like                        | Cluster0001_Astrocyte-related |
| 1418544_at   | Kcniip3              | Kv channel interacting protein 3, calsenilin                                              | Cluster0001_Astrocyte-related |
| 1435094_at   | Kcnj16               | potassium inwardly-rectifying channel, subfamily J, member 16                             | Cluster0001_Astrocyte-related |
| 1449158_at   | Kcnk2                | potassium channel, subfamily K, member 2                                                  | Cluster0001_Astrocyte-related |
| 1448927_at   | Kcnn2                | potassium intermediate/small conductance calcium-activated channel, subfamily N, member 2 | Cluster0001_Astrocyte-related |
| 1423994_at   | Kif1b                | kinesin family member 1B                                                                  | Cluster0001_Astrocyte-related |
| 1434947_at   | Kif3c                | kinesin family member 3C                                                                  | Cluster0001_Astrocyte-related |
| 1431402_at   | Kirrel3              | kin of IRRE like 3 (Drosophila)                                                           | Cluster0001_Astrocyte-related |

|              |                         |                                                                                                              |                               |
|--------------|-------------------------|--------------------------------------------------------------------------------------------------------------|-------------------------------|
| 1452728_at   | Kirrel3                 | kin of IRRE like 3 (Drosophila)                                                                              | Cluster0001_Astrocyte-related |
| 1417043_at   | Lcat                    | lecithin cholesterol acyltransferase                                                                         | Cluster0001_Astrocyte-related |
| 1416183_a_at | Ldhb                    | lactate dehydrogenase B                                                                                      | Cluster0001_Astrocyte-related |
| 1434499_a_at | Ldhb                    | lactate dehydrogenase B                                                                                      | Cluster0001_Astrocyte-related |
| 1448237_x_at | Ldhb                    | lactate dehydrogenase B                                                                                      | Cluster0001_Astrocyte-related |
| 1455235_x_at | Ldhb                    | lactate dehydrogenase B                                                                                      | Cluster0001_Astrocyte-related |
| 1434121_at   | Lgi4                    | leucine-rich repeat LGI family, member 4                                                                     | Cluster0001_Astrocyte-related |
| 1433990_at   | Lhfp13                  | lipoma HMGIC fusion partner-like 3                                                                           | Cluster0001_Astrocyte-related |
| 1418317_at   | Lhx2                    | LIM homeobox protein 2                                                                                       | Cluster0001_Astrocyte-related |
| 1435106_at   | Limch1                  | LIM and calponin homology domains 1                                                                          | Cluster0001_Astrocyte-related |
| 1435321_at   | Limch1                  | LIM and calponin homology domains 1                                                                          | Cluster0001_Astrocyte-related |
| 1416621_at   | Ligl1                   | lethal giant larvae homolog 1 (Drosophila)                                                                   | Cluster0001_Astrocyte-related |
| 1450928_at   | LOC100045546            | similar to Id4                                                                                               | Cluster0001_Astrocyte-related |
| 1422329_a_at | LOC100047606 /// Ntrk3  | similar to neurotrophic tyrosine kinase, receptor, type 3 /// neurotrophic tyrosine kinase, receptor, type 3 | Cluster0001_Astrocyte-related |
| 1422315_x_at | LOC100047682 /// Phkg1  | similar to phosphorylase kinase, gamma-subunit /// phosphorylase kinase gamma 1                              | Cluster0001_Astrocyte-related |
| 1429981_a_at | LOC100048362 /// Rimklb | similar to mKIAA1238 protein /// ribosomal modification protein rimK-like family member B                    | Cluster0001_Astrocyte-related |
| 1440973_at   | LOC552874               | hypothetical LOC552874                                                                                       | Cluster0001_Astrocyte-related |
| 1455557_at   | LOC553095               | hypothetical LOC553095                                                                                       | Cluster0001_Astrocyte-related |
| 1429965_at   | Lonrf2                  | LON peptidase N-terminal domain and ring finger 2                                                            | Cluster0001_Astrocyte-related |
| 1428523_at   | Lphn3                   | latrophilin 3                                                                                                | Cluster0001_Astrocyte-related |
| 1447551_x_at | Lphn3                   | latrophilin 3                                                                                                | Cluster0001_Astrocyte-related |
| 1460440_at   | Lphn3                   | latrophilin 3                                                                                                | Cluster0001_Astrocyte-related |
| 1434210_s_at | Lrig1                   | leucine-rich repeats and immunoglobulin-like domains 1                                                       | Cluster0001_Astrocyte-related |
| 1449893_a_at | Lrig1                   | leucine-rich repeats and immunoglobulin-like domains 1                                                       | Cluster0001_Astrocyte-related |
| 1416097_at   | Lrrc4                   | leucine rich repeat containing 4                                                                             | Cluster0001_Astrocyte-related |
| 1435832_at   | Lrrc4                   | leucine rich repeat containing 4                                                                             | Cluster0001_Astrocyte-related |
| 1437787_at   | Lrrtm2                  | leucine rich repeat transmembrane neuronal 2                                                                 | Cluster0001_Astrocyte-related |
| 1455489_at   | Lrrtm2                  | leucine rich repeat transmembrane neuronal 2                                                                 | Cluster0001_Astrocyte-related |
| 1433744_at   | Lrtm2                   | leucine-rich repeats and transmembrane domains 2                                                             | Cluster0001_Astrocyte-related |
| 1435895_at   | Lsamp                   | limbic system-associated membrane protein                                                                    | Cluster0001_Astrocyte-related |
| 1455636_at   | Lsamp                   | limbic system-associated membrane protein                                                                    | Cluster0001_Astrocyte-related |
| 1454855_at   | Magi2                   | membrane associated guanylate kinase, WW and PDZ domain containing 2                                         | Cluster0001_Astrocyte-related |
| 1419834_x_at | Mark1                   | MAP/microtubule affinity-regulating kinase 1                                                                 | Cluster0001_Astrocyte-related |
| 1449630_s_at | Mark1                   | MAP/microtubule affinity-regulating kinase 1                                                                 | Cluster0001_Astrocyte-related |
| 1442206_at   | Mdga2                   | MAM domain containing glycosylphosphatidylinositol anchor 2                                                  | Cluster0001_Astrocyte-related |
| 1448139_at   | Mlc1                    | megalencephalic leukoencephalopathy with subcortical cysts 1 homolog (human)                                 | Cluster0001_Astrocyte-related |
| 1424534_at   | Mmd2                    | monocyte to macrophage differentiation-associated 2                                                          | Cluster0001_Astrocyte-related |
| 1438654_x_at | Mmd2                    | monocyte to macrophage differentiation-associated 2                                                          | Cluster0001_Astrocyte-related |
| 1453419_at   | Mras                    | muscle and microspikes RAS                                                                                   | Cluster0001_Astrocyte-related |
| 1430588_at   | Mro                     | maestro                                                                                                      | Cluster0001_Astrocyte-related |
| 1435559_at   | Myo6                    | myosin VI                                                                                                    | Cluster0001_Astrocyte-related |
| 1450468_at   | Myoc                    | myocilin                                                                                                     | Cluster0001_Astrocyte-related |
| 1419889_at   | NA                      | ---                                                                                                          | Cluster0001_Astrocyte-related |
| 1427600_at   | NA                      | ---                                                                                                          | Cluster0001_Astrocyte-related |
| 1432589_at   | NA                      | ---                                                                                                          | Cluster0001_Astrocyte-related |
| 1435583_at   | NA                      | ---                                                                                                          | Cluster0001_Astrocyte-related |
| 1435833_at   | NA                      | ---                                                                                                          | Cluster0001_Astrocyte-related |
| 1436139_at   | NA                      | ---                                                                                                          | Cluster0001_Astrocyte-related |
| 1436246_at   | NA                      | ---                                                                                                          | Cluster0001_Astrocyte-related |
| 1437987_at   | NA                      | ---                                                                                                          | Cluster0001_Astrocyte-related |
| 1438057_at   | NA                      | ---                                                                                                          | Cluster0001_Astrocyte-related |
| 1439322_at   | NA                      | ---                                                                                                          | Cluster0001_Astrocyte-related |
| 1440325_at   | NA                      | ---                                                                                                          | Cluster0001_Astrocyte-related |
| 1440630_at   | NA                      | ---                                                                                                          | Cluster0001_Astrocyte-related |
| 1440714_at   | NA                      | ---                                                                                                          | Cluster0001_Astrocyte-related |
| 1441368_at   | NA                      | ---                                                                                                          | Cluster0001_Astrocyte-related |
| 1441515_at   | NA                      | ---                                                                                                          | Cluster0001_Astrocyte-related |

|              |        |                                                 |                               |
|--------------|--------|-------------------------------------------------|-------------------------------|
| 1441780_at   | NA     | ---                                             | Cluster0001_Astrocyte-related |
| 1441807_s_at | NA     | ---                                             | Cluster0001_Astrocyte-related |
| 1442561_at   | NA     | ---                                             | Cluster0001_Astrocyte-related |
| 1443312_at   | NA     | ---                                             | Cluster0001_Astrocyte-related |
| 1443676_at   | NA     | ---                                             | Cluster0001_Astrocyte-related |
| 1444020_at   | NA     | ---                                             | Cluster0001_Astrocyte-related |
| 1445676_at   | NA     | ---                                             | Cluster0001_Astrocyte-related |
| 1447609_at   | NA     | ---                                             | Cluster0001_Astrocyte-related |
| 1454939_at   | NA     | ---                                             | Cluster0001_Astrocyte-related |
| 1455147_at   | NA     | ---                                             | Cluster0001_Astrocyte-related |
| 1455298_at   | NA     | ---                                             | Cluster0001_Astrocyte-related |
| 1455325_at   | NA     | ---                                             | Cluster0001_Astrocyte-related |
| 1455375_at   | NA     | ---                                             | Cluster0001_Astrocyte-related |
| 1455603_at   | NA     | ---                                             | Cluster0001_Astrocyte-related |
| 1455722_at   | NA     | ---                                             | Cluster0001_Astrocyte-related |
| 1456551_at   | NA     | ---                                             | Cluster0001_Astrocyte-related |
| 1456781_at   | NA     | ---                                             | Cluster0001_Astrocyte-related |
| 1457227_at   | NA     | ---                                             | Cluster0001_Astrocyte-related |
| 1457494_at   | NA     | ---                                             | Cluster0001_Astrocyte-related |
| 1458535_at   | NA     | ---                                             | Cluster0001_Astrocyte-related |
| 1458669_at   | NA     | ---                                             | Cluster0001_Astrocyte-related |
| 1459590_at   | NA     | ---                                             | Cluster0001_Astrocyte-related |
| 1460070_at   | NA     | ---                                             | Cluster0001_Astrocyte-related |
| 1460092_at   | NA     | ---                                             | Cluster0001_Astrocyte-related |
| 1450437_a_at | Ncam1  | neural cell adhesion molecule 1                 | Cluster0001_Astrocyte-related |
| 1425301_at   | Ncam2  | neural cell adhesion molecule 2                 | Cluster0001_Astrocyte-related |
| 1423604_at   | Ncan   | neurocan                                        | Cluster0001_Astrocyte-related |
| 1434679_at   | Ncan   | neurocan                                        | Cluster0001_Astrocyte-related |
| 1449251_at   | Ndp    | Norrie disease (pseudoglioma) (human)           | Cluster0001_Astrocyte-related |
| 1448154_at   | Ndrg2  | N-myc downstream regulated gene 2               | Cluster0001_Astrocyte-related |
| 1456392_at   | Negr1  | neuronal growth regulator 1                     | Cluster0001_Astrocyte-related |
| 1438236_at   | Nfia   | nuclear factor I/A                              | Cluster0001_Astrocyte-related |
| 1456087_at   | Nfia   | nuclear factor I/A                              | Cluster0001_Astrocyte-related |
| 1429901_at   | Nkain2 | Na+/K+ transporting ATPase interacting 2        | Cluster0001_Astrocyte-related |
| 1453329_s_at | Nkain2 | Na+/K+ transporting ATPase interacting 2        | Cluster0001_Astrocyte-related |
| 1422596_at   | Nkain4 | Na+/K+ transporting ATPase interacting 4        | Cluster0001_Astrocyte-related |
| 1437160_at   | Nlgn1  | neuroligin 1                                    | Cluster0001_Astrocyte-related |
| 1421964_at   | Notch3 | Notch gene homolog 3 (Drosophila)               | Cluster0001_Astrocyte-related |
| 1421965_s_at | Notch3 | Notch gene homolog 3 (Drosophila)               | Cluster0001_Astrocyte-related |
| 1429138_at   | Npas3  | neuronal PAS domain protein 3                   | Cluster0001_Astrocyte-related |
| 1438060_at   | Npas3  | neuronal PAS domain protein 3                   | Cluster0001_Astrocyte-related |
| 1450287_at   | Npas3  | neuronal PAS domain protein 3                   | Cluster0001_Astrocyte-related |
| 1434921_at   | Nr2e1  | nuclear receptor subfamily 2, group E, member 1 | Cluster0001_Astrocyte-related |
| 1457289_at   | Nr2e1  | nuclear receptor subfamily 2, group E, member 1 | Cluster0001_Astrocyte-related |
| 1430583_at   | Nrcam  | neuron-glia-CAM-related cell adhesion molecule  | Cluster0001_Astrocyte-related |
| 1434709_at   | Nrcam  | neuron-glia-CAM-related cell adhesion molecule  | Cluster0001_Astrocyte-related |
| 1428240_at   | Nrxn1  | neurexin I                                      | Cluster0001_Astrocyte-related |
| 1454691_at   | Nrxn1  | neurexin I                                      | Cluster0001_Astrocyte-related |
| 1435907_at   | Nrxn2  | neurexin II                                     | Cluster0001_Astrocyte-related |
| 1433788_at   | Nrxn3  | neurexin III                                    | Cluster0001_Astrocyte-related |
| 1426282_at   | Ntm    | neurotrimin                                     | Cluster0001_Astrocyte-related |
| 1426283_at   | Ntm    | neurotrimin                                     | Cluster0001_Astrocyte-related |
| 1458492_x_at | Ntm    | neurotrimin                                     | Cluster0001_Astrocyte-related |
| 1420837_at   | Ntrk2  | neurotrophic tyrosine kinase, receptor, type 2  | Cluster0001_Astrocyte-related |
| 1420838_at   | Ntrk2  | neurotrophic tyrosine kinase, receptor, type 2  | Cluster0001_Astrocyte-related |
| 1435196_at   | Ntrk2  | neurotrophic tyrosine kinase, receptor, type 2  | Cluster0001_Astrocyte-related |
| 1446712_at   | Ntrk2  | neurotrophic tyrosine kinase, receptor, type 2  | Cluster0001_Astrocyte-related |

|              |         |                                                                                     |                               |
|--------------|---------|-------------------------------------------------------------------------------------|-------------------------------|
| 1425071_s_at | Ntrk3   | neurotrophic tyrosine kinase, receptor, type 3                                      | Cluster0001_Astrocyte-related |
| 1433825_at   | Ntrk3   | neurotrophic tyrosine kinase, receptor, type 3                                      | Cluster0001_Astrocyte-related |
| 1417151_a_at | Ntsr2   | neurotensin receptor 2                                                              | Cluster0001_Astrocyte-related |
| 1416149_at   | Olig1   | oligodendrocyte transcription factor 1                                              | Cluster0001_Astrocyte-related |
| 1416232_at   | Olig2   | oligodendrocyte transcription factor 2                                              | Cluster0001_Astrocyte-related |
| 1418212_at   | Omg     | oligodendrocyte myelin glycoprotein                                                 | Cluster0001_Astrocyte-related |
| 1428751_at   | Pacrg   | PARK2 co-regulated                                                                  | Cluster0001_Astrocyte-related |
| 1428958_at   | Paqr8   | progesterin and adipoQ receptor family member VIII                                  | Cluster0001_Astrocyte-related |
| 1431042_at   | Paqr8   | progesterin and adipoQ receptor family member VIII                                  | Cluster0001_Astrocyte-related |
| 1435246_at   | Paqr8   | progesterin and adipoQ receptor family member VIII                                  | Cluster0001_Astrocyte-related |
| 1444468_at   | Paqr8   | progesterin and adipoQ receptor family member VIII                                  | Cluster0001_Astrocyte-related |
| 1425563_s_at | Pcdh10  | protocadherin 10                                                                    | Cluster0001_Astrocyte-related |
| 1430667_at   | Pcdh10  | protocadherin 10                                                                    | Cluster0001_Astrocyte-related |
| 1438134_at   | Pcdh10  | protocadherin 10                                                                    | Cluster0001_Astrocyte-related |
| 1442565_at   | Pcdh10  | protocadherin 10                                                                    | Cluster0001_Astrocyte-related |
| 1438889_at   | Pcdh11x | protocadherin 11 X-linked                                                           | Cluster0001_Astrocyte-related |
| 1436920_at   | Pcdh17  | protocadherin 17                                                                    | Cluster0001_Astrocyte-related |
| 1453070_at   | Pcdh17  | protocadherin 17                                                                    | Cluster0001_Astrocyte-related |
| 1417051_at   | Pcdh8   | protocadherin 8                                                                     | Cluster0001_Astrocyte-related |
| 1447825_x_at | Pcdh8   | protocadherin 8                                                                     | Cluster0001_Astrocyte-related |
| 1429861_at   | Pcdh9   | protocadherin 9                                                                     | Cluster0001_Astrocyte-related |
| 1442659_at   | Pcdh9   | protocadherin 9                                                                     | Cluster0001_Astrocyte-related |
| 1416780_at   | Pfkm    | phosphofructokinase, muscle                                                         | Cluster0001_Astrocyte-related |
| 1428665_at   | Pfn4    | profilin family, member 4                                                           | Cluster0001_Astrocyte-related |
| 1429651_at   | Phactr3 | phosphatase and actin regulator 3                                                   | Cluster0001_Astrocyte-related |
| 1425164_a_at | Phkg1   | phosphorylase kinase gamma 1                                                        | Cluster0001_Astrocyte-related |
| 1426994_at   | Phlpp1  | PH domain and leucine rich repeat protein phosphatase 1                             | Cluster0001_Astrocyte-related |
| 1427023_at   | Phyhipl | phytanoyl-CoA hydroxylase interacting protein-like                                  | Cluster0001_Astrocyte-related |
| 1437062_s_at | Phyhipl | phytanoyl-CoA hydroxylase interacting protein-like                                  | Cluster0001_Astrocyte-related |
| 1456231_at   | Pla2g3  | phospholipase A2, group III                                                         | Cluster0001_Astrocyte-related |
| 1437030_at   | Plcd4   | phospholipase C, delta 4                                                            | Cluster0001_Astrocyte-related |
| 1420996_at   | Plxna3  | plexin A3                                                                           | Cluster0001_Astrocyte-related |
| 1435254_at   | Plxnb1  | plexin B1                                                                           | Cluster0001_Astrocyte-related |
| 1435255_at   | Plxnb1  | plexin B1                                                                           | Cluster0001_Astrocyte-related |
| 1429020_at   | Pon2    | paraoxonase 2                                                                       | Cluster0001_Astrocyte-related |
| 1435197_at   | Pou3f3  | POU domain, class 3, transcription factor 3                                         | Cluster0001_Astrocyte-related |
| 1422165_at   | Pou3f4  | POU domain, class 3, transcription factor 4                                         | Cluster0001_Astrocyte-related |
| 1447623_s_at | Prkd1   | protein kinase D1                                                                   | Cluster0001_Astrocyte-related |
| 1428268_at   | Psd2    | pleckstrin and Sec7 domain containing 2                                             | Cluster0001_Astrocyte-related |
| 1428853_at   | Ptch1   | patched homolog 1                                                                   | Cluster0001_Astrocyte-related |
| 1454698_at   | Ptplad1 | protein tyrosine phosphatase-like A domain containing 1                             | Cluster0001_Astrocyte-related |
| 1437329_at   | Ptpib   | protein tyrosine phosphatase-like (proline instead of catalytic arginine), member B | Cluster0001_Astrocyte-related |
| 1439725_at   | Ptprt   | protein tyrosine phosphatase, receptor type, T                                      | Cluster0001_Astrocyte-related |
| 1450174_at   | Ptprt   | protein tyrosine phosphatase, receptor type, T                                      | Cluster0001_Astrocyte-related |
| 1418690_at   | Ptprz1  | protein tyrosine phosphatase, receptor type Z, polypeptide 1                        | Cluster0001_Astrocyte-related |
| 1427019_at   | Ptprz1  | protein tyrosine phosphatase, receptor type Z, polypeptide 1                        | Cluster0001_Astrocyte-related |
| 1452284_at   | Ptprz1  | protein tyrosine phosphatase, receptor type Z, polypeptide 1                        | Cluster0001_Astrocyte-related |
| 1424970_at   | Purg    | purine-rich element binding protein G                                               | Cluster0001_Astrocyte-related |
| 1441964_at   | Qk      | quaking                                                                             | Cluster0001_Astrocyte-related |
| 1438590_at   | Rapgef3 | Rap guanine nucleotide exchange factor (GEF) 3                                      | Cluster0001_Astrocyte-related |
| 1433566_at   | Rasl10b | RAS-like, family 10, member B                                                       | Cluster0001_Astrocyte-related |
| 1428895_at   | Rftn2   | raftlin family member 2                                                             | Cluster0001_Astrocyte-related |
| 1436931_at   | Rfx4    | regulatory factor X, 4 (influences HLA class II expression)                         | Cluster0001_Astrocyte-related |
| 1438241_at   | Rgma    | RGM domain family, member A                                                         | Cluster0001_Astrocyte-related |
| 1443694_at   | Rgs20   | regulator of G-protein signaling 20                                                 | Cluster0001_Astrocyte-related |
| 1429982_at   | Rimkb   | ribosomal modification protein rimK-like family member B                            | Cluster0001_Astrocyte-related |
| 1418310_a_at | Rlbp1   | retinaldehyde binding protein 1                                                     | Cluster0001_Astrocyte-related |



|              |          |                                                                                                     |                               |
|--------------|----------|-----------------------------------------------------------------------------------------------------|-------------------------------|
| 1422670_at   | Rnd2     | Rho family GTPase 2                                                                                 | Cluster0001_Astrocyte-related |
| 1434982_at   | Rnf182   | ring finger protein 182                                                                             | Cluster0001_Astrocyte-related |
| 1440086_at   | Rnf182   | ring finger protein 182                                                                             | Cluster0001_Astrocyte-related |
| 1452756_at   | Rnf215   | ring finger protein 215                                                                             | Cluster0001_Astrocyte-related |
| 1425162_at   | Rorb     | RAR-related orphan receptor beta                                                                    | Cluster0001_Astrocyte-related |
| 1439862_at   | Rorb     | RAR-related orphan receptor beta                                                                    | Cluster0001_Astrocyte-related |
| 1429761_at   | Rtn1     | reticulum 1                                                                                         | Cluster0001_Astrocyte-related |
| 1416638_at   | Sall2    | sal-like 2 (Drosophila)                                                                             | Cluster0001_Astrocyte-related |
| 1441186_at   | Sall3    | sal-like 3 (Drosophila)                                                                             | Cluster0001_Astrocyte-related |
| 1459627_at   | Sc4mol   | Sterol-C4-methyl oxidase-like                                                                       | Cluster0001_Astrocyte-related |
| 1420764_at   | Scrg1    | scrapie responsive gene 1                                                                           | Cluster0001_Astrocyte-related |
| 1422146_at   | Sema5b   | sema domain, seven thrombospondin repeats (type 1 and type 1-like), transmembrane domain (TM) and s | Cluster0001_Astrocyte-related |
| 1435963_at   | Sema5b   | sema domain, seven thrombospondin repeats (type 1 and type 1-like), transmembrane domain (TM) and s | Cluster0001_Astrocyte-related |
| 1436618_at   | Sfxn5    | sideroflexin 5                                                                                      | Cluster0001_Astrocyte-related |
| 1436678_at   | Sgcb     | sarcoglycan, beta (dystrophin-associated glycoprotein)                                              | Cluster0001_Astrocyte-related |
| 1440655_at   | Sgip1    | SH3-domain GRB2-like (endophilin) interacting protein 1                                             | Cluster0001_Astrocyte-related |
| 1441065_at   | Shc3     | Src homology 2 domain-containing transforming protein C3                                            | Cluster0001_Astrocyte-related |
| 1417486_at   | Shd      | src homology 2 domain-containing transforming protein D                                             | Cluster0001_Astrocyte-related |
| 1435424_x_at | Shisa9   | shisa homolog 9 (Xenopus laevis)                                                                    | Cluster0001_Astrocyte-related |
| 1435936_at   | Slc13a5  | solute carrier family 13 (sodium-dependent citrate transporter), member 5                           | Cluster0001_Astrocyte-related |
| 1426109_a_at | Slc14a2  | solute carrier family 14 (urea transporter), member 2                                               | Cluster0001_Astrocyte-related |
| 1417600_at   | Slc15a2  | solute carrier family 15 (H+/peptide transporter), member 2                                         | Cluster0001_Astrocyte-related |
| 1438194_at   | Slc1a2   | solute carrier family 1 (glial high affinity glutamate transporter), member 2                       | Cluster0001_Astrocyte-related |
| 1439940_at   | Slc1a2   | solute carrier family 1 (glial high affinity glutamate transporter), member 2                       | Cluster0001_Astrocyte-related |
| 1451627_a_at | Slc1a2   | solute carrier family 1 (glial high affinity glutamate transporter), member 2                       | Cluster0001_Astrocyte-related |
| 1457800_at   | Slc1a2   | Solute carrier family 1 (glial high affinity glutamate transporter), member 2                       | Cluster0001_Astrocyte-related |
| 1459014_at   | Slc1a2   | Solute carrier family 1 (glial high affinity glutamate transporter), member 2                       | Cluster0001_Astrocyte-related |
| 1426340_at   | Slc1a3   | solute carrier family 1 (glial high affinity glutamate transporter), member 3                       | Cluster0001_Astrocyte-related |
| 1426341_at   | Slc1a3   | solute carrier family 1 (glial high affinity glutamate transporter), member 3                       | Cluster0001_Astrocyte-related |
| 1443749_x_at | Slc1a3   | solute carrier family 1 (glial high affinity glutamate transporter), member 3                       | Cluster0001_Astrocyte-related |
| 1452031_at   | Slc1a3   | solute carrier family 1 (glial high affinity glutamate transporter), member 3                       | Cluster0001_Astrocyte-related |
| 1423549_at   | Slc1a4   | solute carrier family 1 (glutamate/neutral amino acid transporter), member 4                        | Cluster0001_Astrocyte-related |
| 1423550_at   | Slc1a4   | solute carrier family 1 (glutamate/neutral amino acid transporter), member 4                        | Cluster0001_Astrocyte-related |
| 1456003_a_at | Slc1a4   | solute carrier family 1 (glutamate/neutral amino acid transporter), member 4                        | Cluster0001_Astrocyte-related |
| 1434235_at   | Slc20a2  | solute carrier family 20, member 2                                                                  | Cluster0001_Astrocyte-related |
| 1448209_a_at | Slc22a17 | solute carrier family 22 (organic cation transporter), member 17                                    | Cluster0001_Astrocyte-related |
| 1428964_at   | Slc25a18 | solute carrier family 25 (mitochondrial carrier), member 18                                         | Cluster0001_Astrocyte-related |
| 1435911_s_at | Slc2a12  | solute carrier family 2 (facilitated glucose transporter), member 12                                | Cluster0001_Astrocyte-related |
| 1436719_at   | Slc35f1  | solute carrier family 35, member F1                                                                 | Cluster0001_Astrocyte-related |
| 1418706_at   | Slc38a3  | solute carrier family 38, member 3                                                                  | Cluster0001_Astrocyte-related |
| 1436611_at   | Slc39a12 | solute carrier family 39 (zinc transporter), member 12                                              | Cluster0001_Astrocyte-related |
| 1447248_at   | Slc39a12 | solute carrier family 39 (zinc transporter), member 12                                              | Cluster0001_Astrocyte-related |
| 1460565_at   | Slc41a1  | solute carrier family 41, member 1                                                                  | Cluster0001_Astrocyte-related |
| 1434096_at   | Slc4a4   | solute carrier family 4 (anion exchanger), member 4                                                 | Cluster0001_Astrocyte-related |
| 1452142_at   | Slc6a1   | solute carrier family 6 (neurotransmitter transporter, GABA), member 1                              | Cluster0001_Astrocyte-related |
| 1457183_at   | Slc6a1   | solute carrier family 6 (neurotransmitter transporter, GABA), member 1                              | Cluster0001_Astrocyte-related |
| 1433989_at   | Slc6a11  | solute carrier family 6 (neurotransmitter transporter, GABA), member 11                             | Cluster0001_Astrocyte-related |
| 1421093_at   | Slc7a10  | solute carrier family 7 (cationic amino acid transporter, y+ system), member 10                     | Cluster0001_Astrocyte-related |
| 1423343_at   | Slco1c1  | solute carrier organic anion transporter family, member 1c1                                         | Cluster0001_Astrocyte-related |
| 1441127_at   | Slitrk2  | SLIT and NTRK-like family, member 2                                                                 | Cluster0001_Astrocyte-related |
| 1437707_at   | Slmo1    | slowmo homolog 1 (Drosophila)                                                                       | Cluster0001_Astrocyte-related |
| 1419358_at   | Sorcs2   | sortilin-related VPS10 domain containing receptor 2                                                 | Cluster0001_Astrocyte-related |
| 1438729_at   | Sox1     | SRY-box containing gene 1                                                                           | Cluster0001_Astrocyte-related |
| 1437059_at   | Sox21    | SRY-box containing gene 21                                                                          | Cluster0001_Astrocyte-related |
| 1451835_at   | Sox21    | SRY-box containing gene 21                                                                          | Cluster0001_Astrocyte-related |
| 1460587_at   | Sox2ot   | SOX2 overlapping transcript (non-protein coding)                                                    | Cluster0001_Astrocyte-related |
| 1423500_a_at | Sox5     | SRY-box containing gene 5                                                                           | Cluster0001_Astrocyte-related |

|              |               |                                                                                                               |                                     |
|--------------|---------------|---------------------------------------------------------------------------------------------------------------|-------------------------------------|
| 1416114_at   | Sparcl1       | SPARC-like 1                                                                                                  | Cluster0001_Astrocyte-related       |
| 1434819_at   | St6gal2       | beta galactoside alpha 2,6 sialyltransferase 2                                                                | Cluster0001_Astrocyte-related       |
| 1419420_at   | St6galnac5    | ST6 (alpha-N-acetyl-neuraminyl-2,3-beta-galactosyl-1,3)-N-acetylgalactosaminide alpha-2,6-sialyltransferase 2 | Cluster0001_Astrocyte-related       |
| 1449468_at   | St6galnac5    | ST6 (alpha-N-acetyl-neuraminyl-2,3-beta-galactosyl-1,3)-N-acetylgalactosaminide alpha-2,6-sialyltransferase 2 | Cluster0001_Astrocyte-related       |
| 1420377_at   | St8sia2       | ST8 alpha-N-acetyl-neuraminide alpha-2,8-sialyltransferase 2                                                  | Cluster0001_Astrocyte-related       |
| 1438780_at   | Stx1b         | syntaxin 1B                                                                                                   | Cluster0001_Astrocyte-related       |
| 1429314_at   | Syt11         | synaptotagmin XI                                                                                              | Cluster0001_Astrocyte-related       |
| 1429315_at   | Syt11         | synaptotagmin XI                                                                                              | Cluster0001_Astrocyte-related       |
| 1455176_a_at | Syt11         | synaptotagmin XI                                                                                              | Cluster0001_Astrocyte-related       |
| 1456464_x_at | Syt11         | Synaptotagmin XI                                                                                              | Cluster0001_Astrocyte-related       |
| 1434429_at   | Syt16         | synaptotagmin XVI                                                                                             | Cluster0001_Astrocyte-related       |
| 1450683_at   | Tagln3        | transgelin 3                                                                                                  | Cluster0001_Astrocyte-related       |
| 1423405_at   | Timp4         | tissue inhibitor of metalloproteinase 4                                                                       | Cluster0001_Astrocyte-related       |
| 1450974_at   | Timp4         | tissue inhibitor of metalloproteinase 4                                                                       | Cluster0001_Astrocyte-related       |
| 1436404_at   | Tlcd1         | TLC domain containing 1                                                                                       | Cluster0001_Astrocyte-related       |
| 1452132_at   | Tlcd1         | TLC domain containing 1                                                                                       | Cluster0001_Astrocyte-related       |
| 1449533_at   | Tmem100       | transmembrane protein 100                                                                                     | Cluster0001_Astrocyte-related       |
| 1457701_at   | Tmem136       | transmembrane protein 136                                                                                     | Cluster0001_Astrocyte-related       |
| 1434136_at   | Tmem229a      | transmembrane protein 229A                                                                                    | Cluster0001_Astrocyte-related       |
| 1455963_at   | Tmem229a      | transmembrane protein 229A                                                                                    | Cluster0001_Astrocyte-related       |
| 1448340_at   | Tmem30a       | transmembrane protein 30A                                                                                     | Cluster0001_Astrocyte-related       |
| 1455044_at   | Tmem44        | transmembrane protein 44                                                                                      | Cluster0001_Astrocyte-related       |
| 1456517_at   | Tmem44        | transmembrane protein 44                                                                                      | Cluster0001_Astrocyte-related       |
| 1439969_at   | Tmem8b        | transmembrane protein 8B                                                                                      | Cluster0001_Astrocyte-related       |
| 1456344_at   | Tnc           | Tenascin C                                                                                                    | Cluster0001_Astrocyte-related       |
| 1415921_a_at | Tnfrsf19      | tumor necrosis factor receptor superfamily, member 19                                                         | Cluster0001_Astrocyte-related       |
| 1425212_a_at | Tnfrsf19      | tumor necrosis factor receptor superfamily, member 19                                                         | Cluster0001_Astrocyte-related       |
| 1448147_at   | Tnfrsf19      | tumor necrosis factor receptor superfamily, member 19                                                         | Cluster0001_Astrocyte-related       |
| 1436148_at   | Tnr           | Tenascin R                                                                                                    | Cluster0001_Astrocyte-related       |
| 1452650_at   | Trim62        | tripartite motif-containing 62                                                                                | Cluster0001_Astrocyte-related       |
| 1434249_s_at | Trim9         | tripartite motif-containing 9                                                                                 | Cluster0001_Astrocyte-related       |
| 1434595_at   | Trim9         | tripartite motif-containing 9                                                                                 | Cluster0001_Astrocyte-related       |
| 1443989_at   | Trim9         | tripartite motif-containing 9                                                                                 | Cluster0001_Astrocyte-related       |
| 1454886_x_at | Trim9         | tripartite motif-containing 9                                                                                 | Cluster0001_Astrocyte-related       |
| 1439026_at   | Trpm3         | transient receptor potential cation channel, subfamily M, member 3                                            | Cluster0001_Astrocyte-related       |
| 1448737_at   | Tspan7        | tetraspanin 7                                                                                                 | Cluster0001_Astrocyte-related       |
| 1427284_a_at | Ttpa          | tocopherol (alpha) transfer protein                                                                           | Cluster0001_Astrocyte-related       |
| 1422694_at   | Ttyh1         | tweety homolog 1 (Drosophila)                                                                                 | Cluster0001_Astrocyte-related       |
| 1422695_at   | Ttyh1         | tweety homolog 1 (Drosophila)                                                                                 | Cluster0001_Astrocyte-related       |
| 1422696_at   | Ttyh1         | tweety homolog 1 (Drosophila)                                                                                 | Cluster0001_Astrocyte-related       |
| 1440484_at   | Unc5d         | unc-5 homolog D (C. elegans)                                                                                  | Cluster0001_Astrocyte-related       |
| 1436118_at   | Vangl2        | vang-like 2 (van gogh, Drosophila)                                                                            | Cluster0001_Astrocyte-related       |
| 1435195_at   | Vash1         | vasohibin 1                                                                                                   | Cluster0001_Astrocyte-related       |
| 1432088_at   | Veph1         | ventricular zone expressed PH domain homolog 1 (zebrafish)                                                    | Cluster0001_Astrocyte-related       |
| 1426231_at   | Vit           | vitrin                                                                                                        | Cluster0001_Astrocyte-related       |
| 1423367_at   | Wnt7a         | wingless-related MMTV integration site 7A                                                                     | Cluster0001_Astrocyte-related       |
| 1455845_at   | Wscd1         | WSC domain containing 1                                                                                       | Cluster0001_Astrocyte-related       |
| 1430650_at   | Zfp191        | zinc finger protein 191                                                                                       | Cluster0001_Astrocyte-related       |
| 1421301_at   | Zic2          | zinc finger protein of the cerebellum 2                                                                       | Cluster0001_Astrocyte-related       |
| 1434906_at   | 0610005C13Rik | RIKEN cDNA 0610005C13 gene                                                                                    | Cluster0002_Small-intestine-related |
| 1453043_at   | 0610012H03Rik | RIKEN cDNA 0610012H03 gene                                                                                    | Cluster0002_Small-intestine-related |
| 1428071_at   | 1110038D17Rik | RIKEN cDNA 1110038D17 gene                                                                                    | Cluster0002_Small-intestine-related |
| 1428420_a_at | 1200009I06Rik | RIKEN cDNA 1200009I06 gene                                                                                    | Cluster0002_Small-intestine-related |
| 1439014_at   | 1600021P15Rik | RIKEN cDNA 1600021P15 gene                                                                                    | Cluster0002_Small-intestine-related |
| 1436669_at   | 1700019G17Rik | RIKEN cDNA 1700019G17 gene                                                                                    | Cluster0002_Small-intestine-related |
| 1436670_x_at | 1700019G17Rik | RIKEN cDNA 1700019G17 gene                                                                                    | Cluster0002_Small-intestine-related |
| 1451588_at   | 1810022C23Rik | RIKEN cDNA 1810022C23 gene                                                                                    | Cluster0002_Small-intestine-related |

|              |                                         |                                                                                                                   |                                     |
|--------------|-----------------------------------------|-------------------------------------------------------------------------------------------------------------------|-------------------------------------|
| 1431537_at   | 2010001E11Rik                           | RIKEN cDNA 2010001E11 gene                                                                                        | Cluster0002_Small-intestine-related |
| 1451760_s_at | 2010001E11Rik /// AI317395              | RIKEN cDNA 2010001E11 gene /// expressed sequence AI317395                                                        | Cluster0002_Small-intestine-related |
| 1457976_at   | 2010002M12Rik                           | RIKEN cDNA 2010002M12 gene                                                                                        | Cluster0002_Small-intestine-related |
| 1438359_at   | 2010003K15Rik                           | RIKEN cDNA 2010003K15 gene                                                                                        | Cluster0002_Small-intestine-related |
| 1442123_at   | 2010012P19Rik                           | RIKEN cDNA 2010012P19 gene                                                                                        | Cluster0002_Small-intestine-related |
| 1430890_at   | 2210010C17Rik                           | RIKEN cDNA 2210010C17 gene                                                                                        | Cluster0002_Small-intestine-related |
| 1438074_at   | 2210010C17Rik                           | RIKEN cDNA 2210010C17 gene                                                                                        | Cluster0002_Small-intestine-related |
| 1444182_at   | 2210010C17Rik                           | RIKEN cDNA 2210010C17 gene                                                                                        | Cluster0002_Small-intestine-related |
| 1453403_at   | 2210019I11Rik                           | RIKEN cDNA 2210019I11 gene                                                                                        | Cluster0002_Small-intestine-related |
| 1450987_a_at | 2310004I24Rik                           | RIKEN cDNA 2310004I24 gene                                                                                        | Cluster0002_Small-intestine-related |
| 1432445_at   | 2310016G11Rik                           | RIKEN cDNA 2310016G11 gene                                                                                        | Cluster0002_Small-intestine-related |
| 1428088_at   | 2410002I01Rik                           | RIKEN cDNA 2410002I01 gene                                                                                        | Cluster0002_Small-intestine-related |
| 1423266_at   | 2810405K02Rik                           | RIKEN cDNA 2810405K02 gene                                                                                        | Cluster0002_Small-intestine-related |
| 1430940_at   | 3110045A19Rik                           | RIKEN cDNA 3110045A19 gene                                                                                        | Cluster0002_Small-intestine-related |
| 1449462_at   | 3110049J23Rik                           | RIKEN cDNA 3110049J23 gene                                                                                        | Cluster0002_Small-intestine-related |
| 1455475_at   | 3110057O12Rik                           | RIKEN cDNA 3110057O12 gene                                                                                        | Cluster0002_Small-intestine-related |
| 1453968_at   | 4833439F03Rik                           | RIKEN cDNA 4833439F03 gene                                                                                        | Cluster0002_Small-intestine-related |
| 1448193_at   | 5730403B10Rik                           | RIKEN cDNA 5730403B10 gene                                                                                        | Cluster0002_Small-intestine-related |
| 1454141_at   | 5730416O20Rik                           | RIKEN cDNA 5730416O20 gene                                                                                        | Cluster0002_Small-intestine-related |
| 1433068_at   | 6330582A15Rik                           | RIKEN cDNA 6330582A15 gene                                                                                        | Cluster0002_Small-intestine-related |
| 1454343_at   | 6430710M23Rik                           | RIKEN cDNA 6430710M23 gene                                                                                        | Cluster0002_Small-intestine-related |
| 1424226_at   | 9030617O03Rik                           | RIKEN cDNA 9030617O03 gene                                                                                        | Cluster0002_Small-intestine-related |
| 1430108_at   | 9030622M22Rik                           | RIKEN cDNA 9030622M22 gene                                                                                        | Cluster0002_Small-intestine-related |
| 1451571_s_at | 9130019O22Rik /// E430018J23Rik /// Zfp | RIKEN cDNA 9130019O22 gene /// RIKEN cDNA E430018J23 gene /// zinc finger protein 747 /// zinc finger protein 747 | Cluster0002_Small-intestine-related |
| 1433610_at   | AA986860                                | expressed sequence AA986860                                                                                       | Cluster0002_Small-intestine-related |
| 1421212_at   | Abcc6                                   | ATP-binding cassette, sub-family C (CFTR/MRP), member 6                                                           | Cluster0002_Small-intestine-related |
| 1418838_at   | Abcd1                                   | ATP-binding cassette, sub-family D (ALD), member 1                                                                | Cluster0002_Small-intestine-related |
| 1443046_at   | Abcd3                                   | ATP-binding cassette, sub-family D (ALD), member 3                                                                | Cluster0002_Small-intestine-related |
| 1420656_at   | Abcg8                                   | ATP-binding cassette, sub-family G (WHITE), member 8                                                              | Cluster0002_Small-intestine-related |
| 1418148_at   | Abhd1                                   | abhydrolase domain containing 1                                                                                   | Cluster0002_Small-intestine-related |
| 1416946_a_at | Acaa1a /// Acaa1b                       | acetyl-Coenzyme A acyltransferase 1A /// acetyl-Coenzyme A acyltransferase 1B                                     | Cluster0002_Small-intestine-related |
| 1416947_s_at | Acaa1a /// Acaa1b                       | acetyl-Coenzyme A acyltransferase 1A /// acetyl-Coenzyme A acyltransferase 1B                                     | Cluster0002_Small-intestine-related |
| 1428145_at   | Acaa2                                   | acetyl-Coenzyme A acyltransferase 2 (mitochondrial 3-oxoacyl-Coenzyme A thiolase)                                 | Cluster0002_Small-intestine-related |
| 1428146_s_at | Acaa2                                   | acetyl-Coenzyme A acyltransferase 2 (mitochondrial 3-oxoacyl-Coenzyme A thiolase)                                 | Cluster0002_Small-intestine-related |
| 1429339_a_at | Acad10                                  | acyl-Coenzyme A dehydrogenase family, member 10                                                                   | Cluster0002_Small-intestine-related |
| 1424184_at   | Acadvl                                  | acyl-Coenzyme A dehydrogenase, very long chain                                                                    | Cluster0002_Small-intestine-related |
| 1428271_at   | Acbd4                                   | acyl-Coenzyme A binding domain containing 4                                                                       | Cluster0002_Small-intestine-related |
| 1449626_s_at | Acbd4                                   | acyl-Coenzyme A binding domain containing 4                                                                       | Cluster0002_Small-intestine-related |
| 1427034_at   | Ace                                     | angiotensin I converting enzyme (peptidyl-dipeptidase A) 1                                                        | Cluster0002_Small-intestine-related |
| 1425102_a_at | Ace2                                    | angiotensin I converting enzyme (peptidyl-dipeptidase A) 2                                                        | Cluster0002_Small-intestine-related |
| 1425103_at   | Ace2                                    | angiotensin I converting enzyme (peptidyl-dipeptidase A) 2                                                        | Cluster0002_Small-intestine-related |
| 1423644_at   | Aco1                                    | aconitase 1                                                                                                       | Cluster0002_Small-intestine-related |
| 1456728_x_at | Aco1                                    | aconitase 1                                                                                                       | Cluster0002_Small-intestine-related |
| 1425667_at   | Acot11                                  | acyl-CoA thioesterase 11                                                                                          | Cluster0002_Small-intestine-related |
| 1419395_at   | Acot12                                  | acyl-CoA thioesterase 12                                                                                          | Cluster0002_Small-intestine-related |
| 1449457_at   | Acot12                                  | acyl-CoA thioesterase 12                                                                                          | Cluster0002_Small-intestine-related |
| 1417449_at   | Acot8                                   | acyl-CoA thioesterase 8                                                                                           | Cluster0002_Small-intestine-related |
| 1444518_at   | Acox1                                   | Acyl-Coenzyme A oxidase 1, palmitoyl                                                                              | Cluster0002_Small-intestine-related |
| 1428082_at   | Acs15                                   | acyl-CoA synthetase long-chain family member 5                                                                    | Cluster0002_Small-intestine-related |
| 1437662_at   | Acsm5                                   | acyl-CoA synthetase medium-chain family member 5                                                                  | Cluster0002_Small-intestine-related |
| 1419173_at   | Acy1                                    | aminoacylase 1                                                                                                    | Cluster0002_Small-intestine-related |
| 1448539_a_at | Acy3                                    | aspartoacylase (aminoacylase) 3                                                                                   | Cluster0002_Small-intestine-related |
| 1438266_at   | Adamts15                                | ADAMTS-like 5                                                                                                     | Cluster0002_Small-intestine-related |
| 1433556_at   | Adap1                                   | ArfGAP with dual PH domains 1                                                                                     | Cluster0002_Small-intestine-related |
| 1422070_at   | Adh4                                    | alcohol dehydrogenase 4 (class II), pi polypeptide                                                                | Cluster0002_Small-intestine-related |
| 1434329_s_at | Adipor2                                 | adiponectin receptor 2                                                                                            | Cluster0002_Small-intestine-related |
| 1428821_at   | Agpat2                                  | 1-acylglycerol-3-phosphate O-acyltransferase 2 (lysophosphatidic acid acyltransferase, beta)                      | Cluster0002_Small-intestine-related |

|              |                      |                                                                                       |                                     |
|--------------|----------------------|---------------------------------------------------------------------------------------|-------------------------------------|
| 1454799_at   | Agpat9               | 1-acylglycerol-3-phosphate O-acyltransferase 9                                        | Cluster0002_Small-intestine-related |
| 1439796_at   | Al747448             | expressed sequence Al747448                                                           | Cluster0002_Small-intestine-related |
| 1448450_at   | Ak2 /// LOC100047005 | adenylate kinase 2 /// similar to adenylate kinase 2                                  | Cluster0002_Small-intestine-related |
| 1423556_at   | Akr1b7               | aldo-keto reductase family 1, member B7                                               | Cluster0002_Small-intestine-related |
| 1423731_at   | Aldh16a1             | aldehyde dehydrogenase 16 family, member A1                                           | Cluster0002_Small-intestine-related |
| 1452375_at   | Aldh4a1              | aldehyde dehydrogenase 4 family, member A1                                            | Cluster0002_Small-intestine-related |
| 1451194_at   | Aldob                | aldolase B, fructose-bisphosphate                                                     | Cluster0002_Small-intestine-related |
| 1431077_at   | Alpi                 | alkaline phosphatase, intestinal                                                      | Cluster0002_Small-intestine-related |
| 1439758_at   | Als2cr12             | amyotrophic lateral sclerosis 2 (juvenile) chromosome region, candidate 12 (human)    | Cluster0002_Small-intestine-related |
| 1417920_at   | Amn                  | amniotless                                                                            | Cluster0002_Small-intestine-related |
| 1429300_at   | Ankrd9               | ankyrin repeat domain 9                                                               | Cluster0002_Small-intestine-related |
| 1455308_at   | Ano6                 | anoctamin 6                                                                           | Cluster0002_Small-intestine-related |
| 1455309_at   | Ano6                 | anoctamin 6                                                                           | Cluster0002_Small-intestine-related |
| 1424959_at   | Anxa13               | annexin A13                                                                           | Cluster0002_Small-intestine-related |
| 1455735_at   | Ap1s3                | adaptor-related protein complex AP-1, sigma 3                                         | Cluster0002_Small-intestine-related |
| 1416182_at   | Apba3                | amyloid beta (A4) precursor protein-binding, family A, member 3                       | Cluster0002_Small-intestine-related |
| 1426030_a_at | Apeh                 | acylpeptide hydrolase                                                                 | Cluster0002_Small-intestine-related |
| 1419232_a_at | Apoa1                | apolipoprotein A-I                                                                    | Cluster0002_Small-intestine-related |
| 1419233_x_at | Apoa1                | apolipoprotein A-I                                                                    | Cluster0002_Small-intestine-related |
| 1438840_x_at | Apoa1                | apolipoprotein A-I                                                                    | Cluster0002_Small-intestine-related |
| 1455201_x_at | Apoa1                | apolipoprotein A-I                                                                    | Cluster0002_Small-intestine-related |
| 1417761_at   | Apoa4                | apolipoprotein A-IV                                                                   | Cluster0002_Small-intestine-related |
| 1436504_x_at | Apoa4                | apolipoprotein A-IV                                                                   | Cluster0002_Small-intestine-related |
| 1455593_at   | Apob                 | apolipoprotein B                                                                      | Cluster0002_Small-intestine-related |
| 1418069_at   | Apoc2                | apolipoprotein C-II                                                                   | Cluster0002_Small-intestine-related |
| 1429254_at   | Aqp11                | aquaporin 11                                                                          | Cluster0002_Small-intestine-related |
| 1447606_x_at | Aqp11                | aquaporin 11                                                                          | Cluster0002_Small-intestine-related |
| 1418847_at   | Arg2                 | arginase type II                                                                      | Cluster0002_Small-intestine-related |
| 1438841_s_at | Arg2                 | arginase type II                                                                      | Cluster0002_Small-intestine-related |
| 1425994_a_at | Asah2                | N-acylsphingosine amidohydrolase 2                                                    | Cluster0002_Small-intestine-related |
| 1450726_at   | Asah2                | N-acylsphingosine amidohydrolase 2                                                    | Cluster0002_Small-intestine-related |
| 1458849_at   | Asah2                | N-acylsphingosine amidohydrolase 2                                                    | Cluster0002_Small-intestine-related |
| 1418472_at   | Aspa                 | aspartoacylase                                                                        | Cluster0002_Small-intestine-related |
| 1416793_at   | Atl2                 | atlastin GTPase 2                                                                     | Cluster0002_Small-intestine-related |
| 1424266_s_at | AU018778             | expressed sequence AU018778                                                           | Cluster0002_Small-intestine-related |
| 1439895_at   | AU021025             | expressed sequence AU021025                                                           | Cluster0002_Small-intestine-related |
| 1452150_at   | AU040320             | expressed sequence AU040320                                                           | Cluster0002_Small-intestine-related |
| 1441470_at   | AV249152             | expressed sequence AV249152                                                           | Cluster0002_Small-intestine-related |
| 1434059_at   | B230312A22Rik        | RIKEN cDNA B230312A22 gene                                                            | Cluster0002_Small-intestine-related |
| 1419618_at   | Bbox1                | butyrobetaine (gamma), 2-oxoglutarate dioxygenase 1 (gamma-butyrobetaine hydroxylase) | Cluster0002_Small-intestine-related |
| 1459030_at   | Bbox1                | butyrobetaine (gamma), 2-oxoglutarate dioxygenase 1 (gamma-butyrobetaine hydroxylase) | Cluster0002_Small-intestine-related |
| 1451681_at   | BC089597             | cDNA sequence BC089597                                                                | Cluster0002_Small-intestine-related |
| 1449211_at   | Bpnt1                | bisphosphate 3 -nucleotidase 1                                                        | Cluster0002_Small-intestine-related |
| 1449453_at   | Bst1                 | bone marrow stromal cell antigen 1                                                    | Cluster0002_Small-intestine-related |
| 1449454_at   | Bst1                 | bone marrow stromal cell antigen 1                                                    | Cluster0002_Small-intestine-related |
| 1428095_a_at | C2cd2l               | C2 calcium-dependent domain containing 2-like                                         | Cluster0002_Small-intestine-related |
| 1457585_at   | C2cd2l               | C2 calcium-dependent domain containing 2-like                                         | Cluster0002_Small-intestine-related |
| 1448093_s_at | C77405               | expressed sequence C77405                                                             | Cluster0002_Small-intestine-related |
| 1448659_at   | Casp7                | caspase 7                                                                             | Cluster0002_Small-intestine-related |
| 1416429_a_at | Cat                  | catalase                                                                              | Cluster0002_Small-intestine-related |
| 1416430_at   | Cat                  | catalase                                                                              | Cluster0002_Small-intestine-related |
| 1460196_at   | Cbr1                 | carbonyl reductase 1                                                                  | Cluster0002_Small-intestine-related |
| 1430076_at   | Ccdc116              | coiled-coil domain containing 116                                                     | Cluster0002_Small-intestine-related |
| 1428066_at   | Ccdc120              | coiled-coil domain containing 120                                                     | Cluster0002_Small-intestine-related |
| 1446038_at   | Ccr9                 | Chemokine (C-C motif) receptor 9                                                      | Cluster0002_Small-intestine-related |
| 1440218_at   | Cdhr2                | cadherin-related family member 2                                                      | Cluster0002_Small-intestine-related |
| 1430927_at   | Ceacam18             | carcinoembryonic antigen-related cell adhesion molecule 18                            | Cluster0002_Small-intestine-related |

|              |                          |                                                                                              |                                     |
|--------------|--------------------------|----------------------------------------------------------------------------------------------|-------------------------------------|
| 1427137_at   | Ces5                     | carboxylesterase 5                                                                           | Cluster0002_Small-intestine-related |
| 1449375_at   | Ces6                     | carboxylesterase 6                                                                           | Cluster0002_Small-intestine-related |
| 1424529_s_at | Cgref1                   | cell growth regulator with EF hand domain 1                                                  | Cluster0002_Small-intestine-related |
| 1454640_at   | Chchd7                   | coiled-coil-helix-coiled-coil-helix domain containing 7                                      | Cluster0002_Small-intestine-related |
| 1431728_at   | Chmp4c                   | chromatin modifying protein 4C                                                               | Cluster0002_Small-intestine-related |
| 1418976_s_at | Cideb                    | cell death-inducing DNA fragmentation factor, alpha subunit-like effector B                  | Cluster0002_Small-intestine-related |
| 1452260_at   | Cidec                    | cell death-inducing DFFA-like effector c                                                     | Cluster0002_Small-intestine-related |
| 1418920_at   | Cldn15                   | claudin 15                                                                                   | Cluster0002_Small-intestine-related |
| 1439505_at   | Clic5                    | chloride intracellular channel 5                                                             | Cluster0002_Small-intestine-related |
| 1456873_at   | Clic5                    | chloride intracellular channel 5                                                             | Cluster0002_Small-intestine-related |
| 1451322_at   | Cmbl                     | carboxymethylenebutenolidase-like (Pseudomonas)                                              | Cluster0002_Small-intestine-related |
| 1424811_at   | Cml5                     | camello-like 5                                                                               | Cluster0002_Small-intestine-related |
| 1437996_s_at | Cnpy1                    | canopy 1 homolog (zebrafish)                                                                 | Cluster0002_Small-intestine-related |
| 1455471_at   | Cnpy1                    | canopy 1 homolog (zebrafish)                                                                 | Cluster0002_Small-intestine-related |
| 1456127_at   | Cnpy1                    | canopy 1 homolog (zebrafish)                                                                 | Cluster0002_Small-intestine-related |
| 1416772_at   | Cpt2                     | carnitine palmitoyltransferase 2                                                             | Cluster0002_Small-intestine-related |
| 1447820_x_at | Cpt2                     | carnitine palmitoyltransferase 2                                                             | Cluster0002_Small-intestine-related |
| 1417008_at   | Crat                     | carnitine acetyltransferase                                                                  | Cluster0002_Small-intestine-related |
| 1450966_at   | Crot                     | carnitine O-octanoyltransferase                                                              | Cluster0002_Small-intestine-related |
| 1416795_at   | Cryl1                    | crystallin, lambda 1                                                                         | Cluster0002_Small-intestine-related |
| 1450667_a_at | Cs                       | citrate synthase                                                                             | Cluster0002_Small-intestine-related |
| 1427910_at   | Cst6                     | cystatin E/M                                                                                 | Cluster0002_Small-intestine-related |
| 1417766_at   | Cyb5b                    | cytochrome b5 type B                                                                         | Cluster0002_Small-intestine-related |
| 1457271_at   | Cym                      | chymosin                                                                                     | Cluster0002_Small-intestine-related |
| 1422257_s_at | Cyp2b10                  | cytochrome P450, family 2, subfamily b, polypeptide 10                                       | Cluster0002_Small-intestine-related |
| 1425645_s_at | Cyp2b10                  | cytochrome P450, family 2, subfamily b, polypeptide 10                                       | Cluster0002_Small-intestine-related |
| 1451787_at   | Cyp2b10                  | cytochrome P450, family 2, subfamily b, polypeptide 10                                       | Cluster0002_Small-intestine-related |
| 1419039_at   | Cyp2d22                  | cytochrome P450, family 2, subfamily d, polypeptide 22                                       | Cluster0002_Small-intestine-related |
| 1448683_at   | Cyp2d26                  | cytochrome P450, family 2, subfamily d, polypeptide 26                                       | Cluster0002_Small-intestine-related |
| 1417952_at   | Cyp2j6                   | cytochrome P450, family 2, subfamily j, polypeptide 6                                        | Cluster0002_Small-intestine-related |
| 1440691_at   | Cyp2j6                   | cytochrome P450, family 2, subfamily j, polypeptide 6                                        | Cluster0002_Small-intestine-related |
| 1453500_at   | Cyp2u1                   | cytochrome P450, family 2, subfamily u, polypeptide 1                                        | Cluster0002_Small-intestine-related |
| 1416809_at   | Cyp3a11                  | cytochrome P450, family 3, subfamily a, polypeptide 11                                       | Cluster0002_Small-intestine-related |
| 1424973_at   | Cyp3a25 /// LOC100044443 | cytochrome P450, family 3, subfamily a, polypeptide 25 /// similar to cytochrome P450III A25 | Cluster0002_Small-intestine-related |
| 1418767_at   | Cyp4f13                  | cytochrome P450, family 4, subfamily f, polypeptide 13                                       | Cluster0002_Small-intestine-related |
| 1419559_at   | Cyp4f14                  | cytochrome P450, family 4, subfamily f, polypeptide 14                                       | Cluster0002_Small-intestine-related |
| 1417277_at   | Cyp4f16                  | cytochrome P450, family 4, subfamily f, polypeptide 16                                       | Cluster0002_Small-intestine-related |
| 1430173_x_at | Cyp4f16                  | cytochrome P450, family 4, subfamily f, polypeptide 16                                       | Cluster0002_Small-intestine-related |
| 1417070_at   | Cyp4v3                   | cytochrome P450, family 4, subfamily v, polypeptide 3                                        | Cluster0002_Small-intestine-related |
| 1417071_s_at | Cyp4v3                   | cytochrome P450, family 4, subfamily v, polypeptide 3                                        | Cluster0002_Small-intestine-related |
| 1443327_at   | D130043K22Rik            | RIKEN cDNA D130043K22 gene                                                                   | Cluster0002_Small-intestine-related |
| 1435366_at   | D430042O09Rik            | RIKEN cDNA D430042O09 gene                                                                   | Cluster0002_Small-intestine-related |
| 1439691_at   | D5Ert579e                | DNA segment, Chr 5, ERATO Doi 579, expressed                                                 | Cluster0002_Small-intestine-related |
| 1446193_at   | D5Ert579e                | DNA segment, Chr 5, ERATO Doi 579, expressed                                                 | Cluster0002_Small-intestine-related |
| 1454680_at   | D5Ert579e                | DNA segment, Chr 5, ERATO Doi 579, expressed                                                 | Cluster0002_Small-intestine-related |
| 1445046_at   | D8Ert317e                | DNA segment, Chr 8, ERATO Doi 317, expressed                                                 | Cluster0002_Small-intestine-related |
| 1448418_s_at | Dcaf11                   | DDB1 and CUL4 associated factor 11                                                           | Cluster0002_Small-intestine-related |
| 1426215_at   | Ddc                      | dopa decarboxylase                                                                           | Cluster0002_Small-intestine-related |
| 1435376_at   | Ddhd2                    | DDHD domain containing 2                                                                     | Cluster0002_Small-intestine-related |
| 1444320_at   | Ddhd2                    | DDHD domain containing 2                                                                     | Cluster0002_Small-intestine-related |
| 1457209_at   | Ddhd2                    | DDHD domain containing 2                                                                     | Cluster0002_Small-intestine-related |
| 1443665_at   | Dennd5b                  | DENN/MADD domain containing 5B                                                               | Cluster0002_Small-intestine-related |
| 1455340_at   | Dennd5b                  | DENN/MADD domain containing 5B                                                               | Cluster0002_Small-intestine-related |
| 1424303_at   | Depdc7                   | DEP domain containing 7                                                                      | Cluster0002_Small-intestine-related |
| 1418295_s_at | Dgat1                    | diacylglycerol O-acyltransferase 1                                                           | Cluster0002_Small-intestine-related |
| 1422677_at   | Dgat2                    | diacylglycerol O-acyltransferase 2                                                           | Cluster0002_Small-intestine-related |
| 1422678_at   | Dgat2                    | diacylglycerol O-acyltransferase 2                                                           | Cluster0002_Small-intestine-related |

|              |                         |                                                                                    |                                     |
|--------------|-------------------------|------------------------------------------------------------------------------------|-------------------------------------|
| 1437000_at   | Dgkq                    | diacylglycerol kinase, theta                                                       | Cluster0002_Small-intestine-related |
| 1430750_at   | Dhfr                    | dihydrofolate reductase                                                            | Cluster0002_Small-intestine-related |
| 1415677_at   | Dhrs1                   | dehydrogenase/reductase (SDR family) member 1                                      | Cluster0002_Small-intestine-related |
| 1451559_a_at | Dhrs4                   | dehydrogenase/reductase (SDR family) member 4                                      | Cluster0002_Small-intestine-related |
| 1416918_at   | Dlg3                    | discs, large homolog 3 (Drosophila)                                                | Cluster0002_Small-intestine-related |
| 1423710_at   | Dlst                    | dihydrolipoamide S-succinyltransferase (E2 component of 2-oxo-glutarate complex)   | Cluster0002_Small-intestine-related |
| 1431011_at   | Dlst                    | dihydrolipoamide S-succinyltransferase (E2 component of 2-oxo-glutarate complex)   | Cluster0002_Small-intestine-related |
| 1438763_at   | Dnahc2                  | dynein, axonemal, heavy chain 2                                                    | Cluster0002_Small-intestine-related |
| 1460365_a_at | Dnm1                    | dynamain 1                                                                         | Cluster0002_Small-intestine-related |
| 1460579_at   | Dnpep                   | aspartyl aminopeptidase                                                            | Cluster0002_Small-intestine-related |
| 1416697_at   | Dpp4                    | dipeptidylpeptidase 4                                                              | Cluster0002_Small-intestine-related |
| 1441342_at   | Dpp4                    | dipeptidylpeptidase 4                                                              | Cluster0002_Small-intestine-related |
| 1427945_at   | Dpyd                    | dihydropyrimidine dehydrogenase                                                    | Cluster0002_Small-intestine-related |
| 1427946_s_at | Dpyd                    | dihydropyrimidine dehydrogenase                                                    | Cluster0002_Small-intestine-related |
| 1450978_at   | Dvl1                    | dishevelled, dsh homolog 1 (Drosophila)                                            | Cluster0002_Small-intestine-related |
| 1438696_at   | Edn3                    | endothelin 3                                                                       | Cluster0002_Small-intestine-related |
| 1435123_at   | Efr3b                   | EFR3 homolog B (S. cerevisiae)                                                     | Cluster0002_Small-intestine-related |
| 1460562_at   | Eftud1                  | elongation factor Tu GTP binding domain containing 1                               | Cluster0002_Small-intestine-related |
| 1448382_at   | Ehhadh                  | enoyl-Coenzyme A, hydratase/3-hydroxyacyl Coenzyme A dehydrogenase                 | Cluster0002_Small-intestine-related |
| 1460643_at   | Ell                     | elongation factor RNA polymerase II                                                | Cluster0002_Small-intestine-related |
| 1436695_x_at | Elmod3 /// LOC100047355 | ELMO/CED-12 domain containing 3 /// similar to RNA binding motif and ELMO domain 1 | Cluster0002_Small-intestine-related |
| 1459171_at   | Emp1                    | Epithelial membrane protein 1                                                      | Cluster0002_Small-intestine-related |
| 1448649_at   | Enpep                   | glutamyl aminopeptidase                                                            | Cluster0002_Small-intestine-related |
| 1427302_at   | Enpp3                   | ectonucleotide pyrophosphatase/phosphodiesterase 3                                 | Cluster0002_Small-intestine-related |
| 1427303_at   | Enpp3                   | ectonucleotide pyrophosphatase/phosphodiesterase 3                                 | Cluster0002_Small-intestine-related |
| 1452384_at   | Enpp3                   | ectonucleotide pyrophosphatase/phosphodiesterase 3                                 | Cluster0002_Small-intestine-related |
| 1431179_at   | Entpd7                  | ectonucleoside triphosphate diphosphohydrolase 7                                   | Cluster0002_Small-intestine-related |
| 1436623_at   | Entpd7                  | ectonucleoside triphosphate diphosphohydrolase 7                                   | Cluster0002_Small-intestine-related |
| 1440595_at   | Epb4.113                | erythrocyte protein band 4.1-like 3                                                | Cluster0002_Small-intestine-related |
| 1422917_at   | Epha1                   | Eph receptor A1                                                                    | Cluster0002_Small-intestine-related |
| 1448499_a_at | Ephx2                   | epoxide hydrolase 2, cytoplasmic                                                   | Cluster0002_Small-intestine-related |
| 1442069_at   | Ept1                    | ethanolaminephosphotransferase 1 (CDP-ethanolamine-specific)                       | Cluster0002_Small-intestine-related |
| 1451360_at   | Ergic2                  | ERGIC and golgi 2                                                                  | Cluster0002_Small-intestine-related |
| 1460652_at   | Esrra                   | estrogen related receptor, alpha                                                   | Cluster0002_Small-intestine-related |
| 1421969_a_at | Faah                    | fatty acid amide hydrolase                                                         | Cluster0002_Small-intestine-related |
| 1434091_at   | Faah                    | fatty acid amide hydrolase                                                         | Cluster0002_Small-intestine-related |
| 1417556_at   | Fabp1                   | fatty acid binding protein 1, liver                                                | Cluster0002_Small-intestine-related |
| 1448764_a_at | Fabp1                   | fatty acid binding protein 1, liver                                                | Cluster0002_Small-intestine-related |
| 1418438_at   | Fabp2                   | fatty acid binding protein 2, intestinal                                           | Cluster0002_Small-intestine-related |
| 1454662_at   | Fam109a                 | family with sequence similarity 109, member A                                      | Cluster0002_Small-intestine-related |
| 1456621_at   | Fam13a                  | family with sequence similarity 13, member A                                       | Cluster0002_Small-intestine-related |
| 1454399_at   | Fam23a                  | family with sequence similarity 23, member A                                       | Cluster0002_Small-intestine-related |
| 1433493_at   | Fam73b                  | family with sequence similarity 73, member B                                       | Cluster0002_Small-intestine-related |
| 1452704_at   | Fam82a2                 | family with sequence similarity 82, member A2                                      | Cluster0002_Small-intestine-related |
| 1448470_at   | Fbp1                    | fructose bisphosphatase 1                                                          | Cluster0002_Small-intestine-related |
| 1449088_at   | Fbp2                    | fructose bisphosphatase 2                                                          | Cluster0002_Small-intestine-related |
| 1451659_at   | Fgd4                    | FYVE, RhoGEF and PH domain containing 4                                            | Cluster0002_Small-intestine-related |
| 1421709_a_at | Fmo5                    | flavin containing monooxygenase 5                                                  | Cluster0002_Small-intestine-related |
| 1440899_at   | Fmo5                    | flavin containing monooxygenase 5                                                  | Cluster0002_Small-intestine-related |
| 1450332_s_at | Fmo5                    | flavin containing monooxygenase 5                                                  | Cluster0002_Small-intestine-related |
| 1422735_at   | Foxq1                   | forkhead box Q1                                                                    | Cluster0002_Small-intestine-related |
| 1438558_x_at | Foxq1                   | forkhead box Q1                                                                    | Cluster0002_Small-intestine-related |
| 1417880_at   | G6pc                    | glucose-6-phosphatase, catalytic                                                   | Cluster0002_Small-intestine-related |
| 1439599_at   | Gal3st2                 | galactose-3-O-sulfotransferase 2                                                   | Cluster0002_Small-intestine-related |
| 1452582_at   | Galm                    | galactose mutarotase                                                               | Cluster0002_Small-intestine-related |
| 1452583_s_at | Galm                    | galactose mutarotase                                                               | Cluster0002_Small-intestine-related |
| 1418863_at   | Gata4                   | GATA binding protein 4                                                             | Cluster0002_Small-intestine-related |

|              |                          |                                                                                        |                                     |
|--------------|--------------------------|----------------------------------------------------------------------------------------|-------------------------------------|
| 1450126_at   | Gata5                    | GATA binding protein 5                                                                 | Cluster0002_Small-intestine-related |
| 1443081_at   | Gata6                    | GATA binding protein 6                                                                 | Cluster0002_Small-intestine-related |
| 1435748_at   | Gda                      | guanine deaminase                                                                      | Cluster0002_Small-intestine-related |
| 1435749_at   | Gda                      | guanine deaminase                                                                      | Cluster0002_Small-intestine-related |
| 1448485_at   | Ggt1                     | gamma-glutamyltransferase 1                                                            | Cluster0002_Small-intestine-related |
| 1424994_at   | Glyctk                   | glycerate kinase                                                                       | Cluster0002_Small-intestine-related |
| 1424995_at   | Glyctk                   | glycerate kinase                                                                       | Cluster0002_Small-intestine-related |
| 1425159_at   | Golt1a                   | golgi transport 1 homolog A (S. cerevisiae)                                            | Cluster0002_Small-intestine-related |
| 1416204_at   | Gpd1                     | glycerol-3-phosphate dehydrogenase 1 (soluble)                                         | Cluster0002_Small-intestine-related |
| 1448249_at   | Gpd1                     | glycerol-3-phosphate dehydrogenase 1 (soluble)                                         | Cluster0002_Small-intestine-related |
| 1444775_at   | Gpr107                   | G protein-coupled receptor 107                                                         | Cluster0002_Small-intestine-related |
| 1454828_at   | Gpr107                   | G protein-coupled receptor 107                                                         | Cluster0002_Small-intestine-related |
| 1452353_at   | Gpr155                   | G protein-coupled receptor 155                                                         | Cluster0002_Small-intestine-related |
| 1439566_at   | Gprin3                   | GPRIN family member 3                                                                  | Cluster0002_Small-intestine-related |
| 1426502_s_at | Gpt                      | glutamic pyruvic transaminase, soluble                                                 | Cluster0002_Small-intestine-related |
| 1453216_at   | Gpt                      | glutamic pyruvic transaminase, soluble                                                 | Cluster0002_Small-intestine-related |
| 1428767_at   | Gsdmd                    | gasdermin D                                                                            | Cluster0002_Small-intestine-related |
| 1422072_a_at | Gstm6                    | glutathione S-transferase, mu 6                                                        | Cluster0002_Small-intestine-related |
| 1419072_at   | Gstm7                    | glutathione S-transferase, mu 7                                                        | Cluster0002_Small-intestine-related |
| 1418186_at   | Gstt1                    | glutathione S-transferase, theta 1                                                     | Cluster0002_Small-intestine-related |
| 1416690_at   | Gtbbp2                   | GTP binding protein 2                                                                  | Cluster0002_Small-intestine-related |
| 1436370_at   | Gucy2c                   | guanylate cyclase 2c                                                                   | Cluster0002_Small-intestine-related |
| 1445242_at   | Gyk                      | glycerol kinase                                                                        | Cluster0002_Small-intestine-related |
| 1425343_at   | Hdhd3                    | haloacid dehalogenase-like hydrolase domain containing 3                               | Cluster0002_Small-intestine-related |
| 1434293_at   | Hectd3                   | HECT domain containing 3                                                               | Cluster0002_Small-intestine-related |
| 1434844_at   | Hexdc                    | hexosaminidase (glycosyl hydrolase family 20, catalytic domain) containing             | Cluster0002_Small-intestine-related |
| 1425900_at   | Hkdc1                    | hexokinase domain containing 1                                                         | Cluster0002_Small-intestine-related |
| 1460127_at   | Hnf4g                    | hepatocyte nuclear factor 4, gamma                                                     | Cluster0002_Small-intestine-related |
| 1419350_at   | Hook2                    | hook homolog 2 (Drosophila)                                                            | Cluster0002_Small-intestine-related |
| 1460606_at   | Hsd17b13                 | hydroxysteroid (17-beta) dehydrogenase 13                                              | Cluster0002_Small-intestine-related |
| 1449385_at   | Hsd17b6                  | hydroxysteroid (17-beta) dehydrogenase 6                                               | Cluster0002_Small-intestine-related |
| 1448679_at   | Hyal2                    | hyaluronoglucosaminidase 2                                                             | Cluster0002_Small-intestine-related |
| 1425120_x_at | Ifi2712b                 | interferon, alpha-inducible protein 27 like 2B                                         | Cluster0002_Small-intestine-related |
| 1427164_at   | Il13ra1                  | interleukin 13 receptor, alpha 1                                                       | Cluster0002_Small-intestine-related |
| 1454658_at   | Ilvbl                    | ilvB (bacterial acetolactate synthase)-like                                            | Cluster0002_Small-intestine-related |
| 1434387_at   | Itfg3                    | integrin alpha FG-GAP repeat containing 3                                              | Cluster0002_Small-intestine-related |
| 1451547_at   | Iyd                      | iodotyrosine deiodinase                                                                | Cluster0002_Small-intestine-related |
| 1448023_at   | Kalrn                    | kalirin, RhoGEF kinase                                                                 | Cluster0002_Small-intestine-related |
| 1457899_at   | Kalrn                    | kalirin, RhoGEF kinase                                                                 | Cluster0002_Small-intestine-related |
| 1421852_at   | Kcnk5                    | potassium channel, subfamily K, member 5                                               | Cluster0002_Small-intestine-related |
| 1449062_at   | Khk                      | ketohexokinase                                                                         | Cluster0002_Small-intestine-related |
| 1417108_at   | Klc4                     | kinesin light chain 4                                                                  | Cluster0002_Small-intestine-related |
| 1419823_s_at | Ksr1                     | kinase suppressor of ras 1                                                             | Cluster0002_Small-intestine-related |
| 1424858_at   | L2ghdh                   | L-2-hydroxyglutarate dehydrogenase                                                     | Cluster0002_Small-intestine-related |
| 1439479_at   | Lct                      | lactase                                                                                | Cluster0002_Small-intestine-related |
| 1433783_at   | Ldb3                     | LIM domain binding 3                                                                   | Cluster0002_Small-intestine-related |
| 1451999_at   | Ldb3                     | LIM domain binding 3                                                                   | Cluster0002_Small-intestine-related |
| 1420826_at   | Letm1                    | leucine zipper-EF-hand containing transmembrane protein 1                              | Cluster0002_Small-intestine-related |
| 1429154_at   | LOC100048307 /// Slc35f2 | similar to Solute carrier family 35, member F2 /// solute carrier family 35, member F2 | Cluster0002_Small-intestine-related |
| 1460178_at   | Lonp2                    | lon peptidase 2, peroxisomal                                                           | Cluster0002_Small-intestine-related |
| 1418723_at   | Lpar3                    | lysophosphatidic acid receptor 3                                                       | Cluster0002_Small-intestine-related |
| 1423960_at   | Lpcat3                   | lysophosphatidylcholine acyltransferase 3                                              | Cluster0002_Small-intestine-related |
| 1424349_a_at | Lpgat1                   | lysophosphatidylglycerol acyltransferase 1                                             | Cluster0002_Small-intestine-related |
| 1424350_s_at | Lpgat1                   | lysophosphatidylglycerol acyltransferase 1                                             | Cluster0002_Small-intestine-related |
| 1435326_at   | Lpgat1                   | lysophosphatidylglycerol acyltransferase 1                                             | Cluster0002_Small-intestine-related |
| 1435327_at   | Lpgat1                   | lysophosphatidylglycerol acyltransferase 1                                             | Cluster0002_Small-intestine-related |
| 1452836_at   | Lpin2                    | lipin 2                                                                                | Cluster0002_Small-intestine-related |

|              |        |                                                           |                                     |
|--------------|--------|-----------------------------------------------------------|-------------------------------------|
| 1450441_at   | Lrrc50 | leucine rich repeat containing 50                         | Cluster0002_Small-intestine-related |
| 1426807_at   | Lta4h  | Leukotriene A4 hydrolase                                  | Cluster0002_Small-intestine-related |
| 1450807_at   | Ltb4r2 | leukotriene B4 receptor 2                                 | Cluster0002_Small-intestine-related |
| 1448244_at   | Lypla1 | lysophospholipase 1                                       | Cluster0002_Small-intestine-related |
| 1434093_at   | Lysmd4 | LysM, putative peptidoglycan-binding, domain containing 4 | Cluster0002_Small-intestine-related |
| 1417227_at   | Mccc1  | methylcrotonoyl-Coenzyme A carboxylase 1 (alpha)          | Cluster0002_Small-intestine-related |
| 1438338_at   | Mdh1   | malate dehydrogenase 1, NAD (soluble)                     | Cluster0002_Small-intestine-related |
| 1448172_at   | Mdh1   | malate dehydrogenase 1, NAD (soluble)                     | Cluster0002_Small-intestine-related |
| 1418215_at   | Mep1b  | meprin 1 beta                                             | Cluster0002_Small-intestine-related |
| 1425302_at   | Mfsd6l | major facilitator superfamily domain containing 6-like    | Cluster0002_Small-intestine-related |
| 1456777_at   | Mgam   | maltase-glucoamylase                                      | Cluster0002_Small-intestine-related |
| 1449964_a_at | Mlycd  | malonyl-CoA decarboxylase                                 | Cluster0002_Small-intestine-related |
| 1424309_a_at | Mocs2  | molybdenum cofactor synthesis 2                           | Cluster0002_Small-intestine-related |
| 1424310_at   | Mocs2  | molybdenum cofactor synthesis 2                           | Cluster0002_Small-intestine-related |
| 1455099_at   | Mogat2 | monoacylglycerol O-acyltransferase 2                      | Cluster0002_Small-intestine-related |
| 1416766_at   | Mosc2  | MOCO sulphurase C-terminal domain containing 2            | Cluster0002_Small-intestine-related |
| 1432453_a_at | Ms4a10 | membrane-spanning 4-domains, subfamily A, member 10       | Cluster0002_Small-intestine-related |
| 1418150_at   | Mtmr4  | myotubularin related protein 4                            | Cluster0002_Small-intestine-related |
| 1418151_at   | Mtmr4  | myotubularin related protein 4                            | Cluster0002_Small-intestine-related |
| 1419399_at   | Mttp   | microsomal triglyceride transfer protein                  | Cluster0002_Small-intestine-related |
| 1419400_at   | Mttp   | microsomal triglyceride transfer protein                  | Cluster0002_Small-intestine-related |
| 1450376_at   | Mxi1   | Max interacting protein 1                                 | Cluster0002_Small-intestine-related |
| 1429805_at   | Myo1a  | myosin IA                                                 | Cluster0002_Small-intestine-related |
| 1419857_at   | NA     | ---                                                       | Cluster0002_Small-intestine-related |
| 1420118_s_at | NA     | ---                                                       | Cluster0002_Small-intestine-related |
| 1435470_at   | NA     | ---                                                       | Cluster0002_Small-intestine-related |
| 1438279_at   | NA     | ---                                                       | Cluster0002_Small-intestine-related |
| 1438345_at   | NA     | ---                                                       | Cluster0002_Small-intestine-related |
| 1441046_at   | NA     | ---                                                       | Cluster0002_Small-intestine-related |
| 1441242_at   | NA     | ---                                                       | Cluster0002_Small-intestine-related |
| 1441364_at   | NA     | ---                                                       | Cluster0002_Small-intestine-related |
| 1441467_at   | NA     | ---                                                       | Cluster0002_Small-intestine-related |
| 1441709_at   | NA     | ---                                                       | Cluster0002_Small-intestine-related |
| 1442080_at   | NA     | ---                                                       | Cluster0002_Small-intestine-related |
| 1442102_at   | NA     | ---                                                       | Cluster0002_Small-intestine-related |
| 1442537_at   | NA     | ---                                                       | Cluster0002_Small-intestine-related |
| 1442983_at   | NA     | ---                                                       | Cluster0002_Small-intestine-related |
| 1443107_at   | NA     | ---                                                       | Cluster0002_Small-intestine-related |
| 1443137_at   | NA     | ---                                                       | Cluster0002_Small-intestine-related |
| 1443202_at   | NA     | ---                                                       | Cluster0002_Small-intestine-related |
| 1443952_at   | NA     | ---                                                       | Cluster0002_Small-intestine-related |
| 1444180_at   | NA     | ---                                                       | Cluster0002_Small-intestine-related |
| 1444266_at   | NA     | ---                                                       | Cluster0002_Small-intestine-related |
| 1444337_at   | NA     | ---                                                       | Cluster0002_Small-intestine-related |
| 1445013_at   | NA     | ---                                                       | Cluster0002_Small-intestine-related |
| 1445153_at   | NA     | ---                                                       | Cluster0002_Small-intestine-related |
| 1445589_at   | NA     | ---                                                       | Cluster0002_Small-intestine-related |
| 1445643_at   | NA     | ---                                                       | Cluster0002_Small-intestine-related |
| 1445900_at   | NA     | ---                                                       | Cluster0002_Small-intestine-related |
| 1446201_at   | NA     | ---                                                       | Cluster0002_Small-intestine-related |
| 1446320_at   | NA     | ---                                                       | Cluster0002_Small-intestine-related |
| 1446503_at   | NA     | ---                                                       | Cluster0002_Small-intestine-related |
| 1447071_at   | NA     | ---                                                       | Cluster0002_Small-intestine-related |
| 1447179_at   | NA     | ---                                                       | Cluster0002_Small-intestine-related |
| 1455961_at   | NA     | ---                                                       | Cluster0002_Small-intestine-related |
| 1457175_at   | NA     | ---                                                       | Cluster0002_Small-intestine-related |
| 1458699_at   | NA     | ---                                                       | Cluster0002_Small-intestine-related |



|              |          |                                                                               |                                     |
|--------------|----------|-------------------------------------------------------------------------------|-------------------------------------|
| 1458829_at   | NA       | ---                                                                           | Cluster0002_Small-intestine-related |
| 1458868_at   | NA       | ---                                                                           | Cluster0002_Small-intestine-related |
| 1459316_at   | NA       | ---                                                                           | Cluster0002_Small-intestine-related |
| 1459556_at   | NA       | ---                                                                           | Cluster0002_Small-intestine-related |
| 1459689_at   | NA       | ---                                                                           | Cluster0002_Small-intestine-related |
| 1459701_x_at | NA       | ---                                                                           | Cluster0002_Small-intestine-related |
| 1459774_at   | NA       | ---                                                                           | Cluster0002_Small-intestine-related |
| 1430359_a_at | Nadsyn1  | NAD synthetase 1                                                              | Cluster0002_Small-intestine-related |
| 1425230_at   | Nags     | N-acetylglutamate synthase                                                    | Cluster0002_Small-intestine-related |
| 1454748_at   | Naprt1   | nicotinate phosphoribosyltransferase domain containing 1                      | Cluster0002_Small-intestine-related |
| 1419520_at   | Nat8     | N-acetyltransferase 8 (GCN5-related, putative)                                | Cluster0002_Small-intestine-related |
| 1428503_a_at | Nkiras1  | NFKB inhibitor interacting Ras-like protein 1                                 | Cluster0002_Small-intestine-related |
| 1425392_a_at | Nr1i3    | nuclear receptor subfamily 1, group I, member 3                               | Cluster0002_Small-intestine-related |
| 1430341_at   | Nudt5    | nudix (nucleoside diphosphate linked moiety X)-type motif 5                   | Cluster0002_Small-intestine-related |
| 1416891_at   | Numb     | numb gene homolog (Drosophila)                                                | Cluster0002_Small-intestine-related |
| 1451274_at   | Ogdh     | oxoglutarate dehydrogenase (lipoamide)                                        | Cluster0002_Small-intestine-related |
| 1429778_at   | Optn     | optineurin                                                                    | Cluster0002_Small-intestine-related |
| 1435679_at   | Optn     | optineurin                                                                    | Cluster0002_Small-intestine-related |
| 1438717_a_at | Osbpl6   | oxysterol binding protein-like 6                                              | Cluster0002_Small-intestine-related |
| 1451831_at   | Osbpl6   | oxysterol binding protein-like 6                                              | Cluster0002_Small-intestine-related |
| 1456495_s_at | Osbpl6   | oxysterol binding protein-like 6                                              | Cluster0002_Small-intestine-related |
| 1457881_at   | Osbpl6   | oxysterol binding protein-like 6                                              | Cluster0002_Small-intestine-related |
| 1424022_at   | Osgin1   | oxidative stress induced growth inhibitor 1                                   | Cluster0002_Small-intestine-related |
| 1429036_at   | Otop3    | otopetrin 3                                                                   | Cluster0002_Small-intestine-related |
| 1419051_at   | Ovol1    | OVO homolog-like 1 (Drosophila)                                               | Cluster0002_Small-intestine-related |
| 1419052_at   | Ovol1    | OVO homolog-like 1 (Drosophila)                                               | Cluster0002_Small-intestine-related |
| 1425057_at   | Pbld     | phenazine biosynthesis-like protein domain containing                         | Cluster0002_Small-intestine-related |
| 1423439_at   | Pck1     | phosphoenolpyruvate carboxykinase 1, cytosolic                                | Cluster0002_Small-intestine-related |
| 1419048_at   | Pcnx     | pecanex homolog (Drosophila)                                                  | Cluster0002_Small-intestine-related |
| 1438248_at   | Pcsk5    | proprotein convertase subtilisin/kexin type 5                                 | Cluster0002_Small-intestine-related |
| 1416027_at   | Pdcd6    | programmed cell death 6                                                       | Cluster0002_Small-intestine-related |
| 1449330_at   | Pdzd3    | PDZ domain containing 3                                                       | Cluster0002_Small-intestine-related |
| 1431701_a_at | Pdzk1    | PDZ domain containing 1                                                       | Cluster0002_Small-intestine-related |
| 1416712_at   | Pepd     | peptidase D                                                                   | Cluster0002_Small-intestine-related |
| 1419365_at   | Pex11a   | peroxisomal biogenesis factor 11 alpha                                        | Cluster0002_Small-intestine-related |
| 1449442_at   | Pex11a   | peroxisomal biogenesis factor 11 alpha                                        | Cluster0002_Small-intestine-related |
| 1425021_a_at | Pex16    | peroxisomal biogenesis factor 16                                              | Cluster0002_Small-intestine-related |
| 1435601_at   | Phlpp2   | PH domain and leucine rich repeat protein phosphatase 2                       | Cluster0002_Small-intestine-related |
| 1460194_at   | Phyh     | phytanoyl-CoA hydroxylase                                                     | Cluster0002_Small-intestine-related |
| 1420411_a_at | Pi4k2b   | phosphatidylinositol 4-kinase type 2 beta                                     | Cluster0002_Small-intestine-related |
| 1421258_a_at | Pklr     | pyruvate kinase liver and red blood cell                                      | Cluster0002_Small-intestine-related |
| 1438711_at   | Pklr     | pyruvate kinase liver and red blood cell                                      | Cluster0002_Small-intestine-related |
| 1419614_at   | Pla2g12b | phospholipase A2, group XIIB                                                  | Cluster0002_Small-intestine-related |
| 1425073_at   | Plekhg6  | pleckstrin homology domain containing, family G (with RhoGef domain) member 6 | Cluster0002_Small-intestine-related |
| 1460406_at   | Pls1     | plastin 1 (I-isoform)                                                         | Cluster0002_Small-intestine-related |
| 1426876_at   | Pm20d1   | peptidase M20 domain containing 1                                             | Cluster0002_Small-intestine-related |
| 1438980_x_at | Pm20d1   | peptidase M20 domain containing 1                                             | Cluster0002_Small-intestine-related |
| 1416517_at   | Pnpla6   | patatin-like phospholipase domain containing 6                                | Cluster0002_Small-intestine-related |
| 1439675_at   | Ppara    | peroxisome proliferator activated receptor alpha                              | Cluster0002_Small-intestine-related |
| 1456395_at   | Ppargc1a | peroxisome proliferative activated receptor, gamma, coactivator 1 alpha       | Cluster0002_Small-intestine-related |
| 1460336_at   | Ppargc1a | peroxisome proliferative activated receptor, gamma, coactivator 1 alpha       | Cluster0002_Small-intestine-related |
| 1453127_at   | Ppm1j    | protein phosphatase 1J                                                        | Cluster0002_Small-intestine-related |
| 1452724_at   | Ppp1r16a | protein phosphatase 1, regulatory (inhibitor) subunit 16A                     | Cluster0002_Small-intestine-related |
| 1459751_s_at | Ppp1r16a | protein phosphatase 1, regulatory (inhibitor) subunit 16A                     | Cluster0002_Small-intestine-related |
| 1421382_at   | Prlr     | prolactin receptor                                                            | Cluster0002_Small-intestine-related |
| 1450201_at   | Proz     | protein Z, vitamin K-dependent plasma glycoprotein                            | Cluster0002_Small-intestine-related |
| 1452473_at   | Prr15    | proline rich 15                                                               | Cluster0002_Small-intestine-related |

|              |           |                                                                                        |                                     |
|--------------|-----------|----------------------------------------------------------------------------------------|-------------------------------------|
| 1417777_at   | Ptgr1     | prostaglandin reductase 1                                                              | Cluster0002_Small-intestine-related |
| 1424456_at   | Pvr12     | poliovirus receptor-related 2                                                          | Cluster0002_Small-intestine-related |
| 1437089_at   | Pyroxd2   | pyridine nucleotide-disulphide oxidoreductase domain 2                                 | Cluster0002_Small-intestine-related |
| 1437590_at   | Pyroxd2   | pyridine nucleotide-disulphide oxidoreductase domain 2                                 | Cluster0002_Small-intestine-related |
| 1438022_at   | Rab11fip3 | RAB11 family interacting protein 3 (class II)                                          | Cluster0002_Small-intestine-related |
| 1434669_at   | Ralgps1   | Ral GEF with PH domain and SH3 binding motif 1                                         | Cluster0002_Small-intestine-related |
| 1420541_at   | Rdh16     | retinol dehydrogenase 16                                                               | Cluster0002_Small-intestine-related |
| 1448723_at   | Rdh7      | retinol dehydrogenase 7                                                                | Cluster0002_Small-intestine-related |
| 1427963_s_at | Rdh9      | retinol dehydrogenase 9                                                                | Cluster0002_Small-intestine-related |
| 1430128_a_at | Reep6     | receptor accessory protein 6                                                           | Cluster0002_Small-intestine-related |
| 1424715_at   | Retsat    | retinol saturase (all trans retinol 13,14 reductase)                                   | Cluster0002_Small-intestine-related |
| 1447818_x_at | Rheb11    | Ras homolog enriched in brain like 1                                                   | Cluster0002_Small-intestine-related |
| 1451516_at   | Rheb11    | Ras homolog enriched in brain like 1                                                   | Cluster0002_Small-intestine-related |
| 1434909_at   | Rragd     | Ras-related GTP binding D                                                              | Cluster0002_Small-intestine-related |
| 1419760_a_at | Rwdd2b    | RWD domain containing 2B                                                               | Cluster0002_Small-intestine-related |
| 1451224_at   | Scamp5    | secretory carrier membrane protein 5                                                   | Cluster0002_Small-intestine-related |
| 1432181_s_at | Sco2      | SCO cytochrome oxidase deficient homolog 2 (yeast)                                     | Cluster0002_Small-intestine-related |
| 1419974_at   | Scp2      | sterol carrier protein 2, liver                                                        | Cluster0002_Small-intestine-related |
| 1426219_at   | Scp2      | sterol carrier protein 2, liver                                                        | Cluster0002_Small-intestine-related |
| 1436012_s_at | Scrn2     | secernin 2                                                                             | Cluster0002_Small-intestine-related |
| 1451822_a_at | Scrn2     | secernin 2                                                                             | Cluster0002_Small-intestine-related |
| 1424530_at   | Sec14I2   | SEC14-like 2 (S. cerevisiae)                                                           | Cluster0002_Small-intestine-related |
| 1450734_at   | Sec16b    | SEC16 homolog B (S. cerevisiae)                                                        | Cluster0002_Small-intestine-related |
| 1436102_at   | Sec22c    | SEC22 vesicle trafficking protein homolog C (S. cerevisiae)                            | Cluster0002_Small-intestine-related |
| 1433934_at   | Sec24a    | Sec24 related gene family, member A (S. cerevisiae)                                    | Cluster0002_Small-intestine-related |
| 1438121_at   | Sec24a    | Sec24 related gene family, member A (S. cerevisiae)                                    | Cluster0002_Small-intestine-related |
| 1448415_a_at | Sema3b    | sema domain, immunoglobulin domain (Ig), short basic domain, secreted, (semaphorin) 3B | Cluster0002_Small-intestine-related |
| 1421414_a_at | Sema6a    | sema domain, transmembrane domain (TM), and cytoplasmic domain, (semaphorin) 6A        | Cluster0002_Small-intestine-related |
| 1425903_at   | Sema6a    | sema domain, transmembrane domain (TM), and cytoplasmic domain, (semaphorin) 6A        | Cluster0002_Small-intestine-related |
| 1418325_at   | Sephs2    | selenophosphate synthetase 2                                                           | Cluster0002_Small-intestine-related |
| 1452853_at   | Shpk      | sedoheptulokinase                                                                      | Cluster0002_Small-intestine-related |
| 1449011_at   | Slc12a7   | solute carrier family 12, member 7                                                     | Cluster0002_Small-intestine-related |
| 1418857_at   | Slc13a2   | solute carrier family 13 (sodium-dependent dicarboxylate transporter), member 2        | Cluster0002_Small-intestine-related |
| 1434592_at   | Slc16a10  | solute carrier family 16 (monocarboxylic acid transporters), member 10                 | Cluster0002_Small-intestine-related |
| 1436417_at   | Slc19a3   | solute carrier family 19 (sodium/hydrogen exchanger), member 3                         | Cluster0002_Small-intestine-related |
| 1450348_at   | Slc19a3   | solute carrier family 19 (sodium/hydrogen exchanger), member 3                         | Cluster0002_Small-intestine-related |
| 1418118_at   | Slc22a1   | solute carrier family 22 (organic cation transporter), member 1                        | Cluster0002_Small-intestine-related |
| 1419129_at   | Slc22a13  | solute carrier family 22 (organic cation transporter), member 13                       | Cluster0002_Small-intestine-related |
| 1417639_at   | Slc22a4   | solute carrier family 22 (organic cation transporter), member 4                        | Cluster0002_Small-intestine-related |
| 1421912_at   | Slc23a1   | solute carrier family 23 (nucleobase transporters), member 1                           | Cluster0002_Small-intestine-related |
| 1450404_at   | Slc23a1   | solute carrier family 23 (nucleobase transporters), member 1                           | Cluster0002_Small-intestine-related |
| 1416954_at   | Slc25a10  | solute carrier family 25 (mitochondrial carrier, dicarboxylate transporter), member 10 | Cluster0002_Small-intestine-related |
| 1420967_at   | Slc25a15  | solute carrier family 25 (mitochondrial carrier ornithine transporter), member 15      | Cluster0002_Small-intestine-related |
| 1416300_a_at | Slc25a3   | solute carrier family 25 (mitochondrial carrier, phosphate carrier), member 3          | Cluster0002_Small-intestine-related |
| 1426883_at   | Slc25a45  | solute carrier family 25, member 45                                                    | Cluster0002_Small-intestine-related |
| 1416275_at   | Slc26a6   | solute carrier family 26, member 6                                                     | Cluster0002_Small-intestine-related |
| 1416316_at   | Slc27a2   | solute carrier family 27 (fatty acid transporter), member 2                            | Cluster0002_Small-intestine-related |
| 1424441_at   | Slc27a4   | solute carrier family 27 (fatty acid transporter), member 4                            | Cluster0002_Small-intestine-related |
| 1449067_at   | Slc2a2    | solute carrier family 2 (facilitated glucose transporter), member 2                    | Cluster0002_Small-intestine-related |
| 1426568_at   | Slc2a9    | solute carrier family 2 (facilitated glucose transporter), member 9                    | Cluster0002_Small-intestine-related |
| 1455508_at   | Slc35e2   | solute carrier family 35, member E2                                                    | Cluster0002_Small-intestine-related |
| 1428793_at   | Slc36a1   | solute carrier family 36 (proton/amino acid symporter), member 1                       | Cluster0002_Small-intestine-related |
| 1417042_at   | Slc37a4   | solute carrier family 37 (glucose-6-phosphate transporter), member 4                   | Cluster0002_Small-intestine-related |
| 1427035_at   | Slc39a14  | solute carrier family 39 (zinc transporter), member 14                                 | Cluster0002_Small-intestine-related |
| 1457770_at   | Slc39a14  | solute carrier family 39 (zinc transporter), member 14                                 | Cluster0002_Small-intestine-related |
| 1429523_a_at | Slc39a5   | solute carrier family 39 (metal ion transporter), member 5                             | Cluster0002_Small-intestine-related |
| 1448741_at   | Slc3a1    | solute carrier family 3, member 1                                                      | Cluster0002_Small-intestine-related |

|              |          |                                                                                 |                                     |
|--------------|----------|---------------------------------------------------------------------------------|-------------------------------------|
| 1434308_at   | Slc43a2  | solute carrier family 43, member 2                                              | Cluster0002_Small-intestine-related |
| 1439965_at   | Slc43a2  | solute carrier family 43, member 2                                              | Cluster0002_Small-intestine-related |
| 1456940_at   | Slc43a2  | solute carrier family 43, member 2                                              | Cluster0002_Small-intestine-related |
| 1426714_at   | Slc46a1  | solute carrier family 46, member 1                                              | Cluster0002_Small-intestine-related |
| 1426715_s_at | Slc46a1  | solute carrier family 46, member 1                                              | Cluster0002_Small-intestine-related |
| 1418395_at   | Slc47a1  | solute carrier family 47, member 1                                              | Cluster0002_Small-intestine-related |
| 1435420_at   | Slc4a5   | solute carrier family 4, sodium bicarbonate cotransporter, member 5             | Cluster0002_Small-intestine-related |
| 1438673_at   | Slc4a7   | solute carrier family 4, sodium bicarbonate cotransporter, member 7             | Cluster0002_Small-intestine-related |
| 1455876_at   | Slc4a7   | solute carrier family 4, sodium bicarbonate cotransporter, member 7             | Cluster0002_Small-intestine-related |
| 1457528_at   | Slc4a7   | solute carrier family 4, sodium bicarbonate cotransporter, member 7             | Cluster0002_Small-intestine-related |
| 1419057_at   | Slc5a1   | solute carrier family 5 (sodium/glucose cotransporter), member 1                | Cluster0002_Small-intestine-related |
| 1455431_at   | Slc5a1   | solute carrier family 5 (sodium/glucose cotransporter), member 1                | Cluster0002_Small-intestine-related |
| 1428752_at   | Slc5a11  | solute carrier family 5 (sodium/glucose cotransporter), member 11               | Cluster0002_Small-intestine-related |
| 1437755_at   | Slc5a12  | solute carrier family 5 (sodium/glucose cotransporter), member 12               | Cluster0002_Small-intestine-related |
| 1456123_at   | Slc5a12  | solute carrier family 5 (sodium/glucose cotransporter), member 12               | Cluster0002_Small-intestine-related |
| 1421637_at   | Slc5a4a  | solute carrier family 5, member 4a                                              | Cluster0002_Small-intestine-related |
| 1422757_at   | Slc5a4b  | solute carrier family 5 (neutral amino acid transporters, system A), member 4b  | Cluster0002_Small-intestine-related |
| 1426634_at   | Slc5a9   | solute carrier family 5 (sodium/glucose cotransporter), member 9                | Cluster0002_Small-intestine-related |
| 1452136_at   | Slc5a9   | solute carrier family 5 (sodium/glucose cotransporter), member 9                | Cluster0002_Small-intestine-related |
| 1428595_at   | Slc6a19  | solute carrier family 6 (neurotransmitter transporter), member 19               | Cluster0002_Small-intestine-related |
| 1455442_at   | Slc6a19  | solute carrier family 6 (neurotransmitter transporter), member 19               | Cluster0002_Small-intestine-related |
| 1427221_at   | Slc6a20a | solute carrier family 6 (neurotransmitter transporter), member 20A              | Cluster0002_Small-intestine-related |
| 1417415_at   | Slc6a3   | solute carrier family 6 (neurotransmitter transporter, dopamine), member 3      | Cluster0002_Small-intestine-related |
| 1417150_at   | Slc6a4   | solute carrier family 6 (neurotransmitter transporter, serotonin), member 4     | Cluster0002_Small-intestine-related |
| 1417116_at   | Slc6a8   | solute carrier family 6 (neurotransmitter transporter, creatine), member 8      | Cluster0002_Small-intestine-related |
| 1453875_at   | Slc7a15  | solute carrier family 7 (cationic amino acid transporter, y+ system), member 15 | Cluster0002_Small-intestine-related |
| 1448783_at   | Slc7a9   | solute carrier family 7 (cationic amino acid transporter, y+ system), member 9  | Cluster0002_Small-intestine-related |
| 1438115_a_at | Slc9a3r1 | solute carrier family 9 (sodium/hydrogen exchanger), member 3 regulator 1       | Cluster0002_Small-intestine-related |
| 1416999_at   | Smpd2    | sphingomyelin phosphodiesterase 2, neutral                                      | Cluster0002_Small-intestine-related |
| 1417300_at   | Smpd13b  | sphingomyelin phosphodiesterase, acid-like 3B                                   | Cluster0002_Small-intestine-related |
| 1455020_at   | Snx25    | sorting nexin 25                                                                | Cluster0002_Small-intestine-related |
| 1460722_at   | Soat2    | sterol O-acyltransferase 2                                                      | Cluster0002_Small-intestine-related |
| 1422914_at   | Sp5      | trans-acting transcription factor 5                                             | Cluster0002_Small-intestine-related |
| 1452206_at   | Sucla2   | succinate-Coenzyme A ligase, ADP-forming, beta subunit                          | Cluster0002_Small-intestine-related |
| 1418940_at   | Sult1b1  | sulfotransferase family 1B, member 1                                            | Cluster0002_Small-intestine-related |
| 1417335_at   | Sult2b1  | sulfotransferase family, cytosolic, 2B, member 1                                | Cluster0002_Small-intestine-related |
| 1426511_at   | Susd2    | sushi domain containing 2                                                       | Cluster0002_Small-intestine-related |
| 1417834_at   | Synj2bp  | synaptojanin 2 binding protein                                                  | Cluster0002_Small-intestine-related |
| 1434089_at   | Synpo    | synaptopodin                                                                    | Cluster0002_Small-intestine-related |
| 1442325_at   | Tbc1d24  | TBC1 domain family, member 24                                                   | Cluster0002_Small-intestine-related |
| 1445571_at   | Tbk1     | TANK-binding kinase 1                                                           | Cluster0002_Small-intestine-related |
| 1428780_at   | Tha1     | threonine aldolase 1                                                            | Cluster0002_Small-intestine-related |
| 1427055_at   | Them4    | thioesterase superfamily member 4                                               | Cluster0002_Small-intestine-related |
| 1432282_a_at | Tlcd2    | TLC domain containing 2                                                         | Cluster0002_Small-intestine-related |
| 1424445_at   | Tm4sf5   | transmembrane 4 superfamily member 5                                            | Cluster0002_Small-intestine-related |
| 1425079_at   | Tm6sf2   | transmembrane 6 superfamily member 2                                            | Cluster0002_Small-intestine-related |
| 1431810_a_at | Tmco4    | transmembrane and coiled-coil domains 4                                         | Cluster0002_Small-intestine-related |
| 1435031_at   | Tmem120a | transmembrane protein 120A                                                      | Cluster0002_Small-intestine-related |
| 1436556_at   | Tmem139  | transmembrane protein 139                                                       | Cluster0002_Small-intestine-related |
| 1431128_at   | Tmem170  | transmembrane protein 170                                                       | Cluster0002_Small-intestine-related |
| 1416261_at   | Tmem19   | transmembrane protein 19                                                        | Cluster0002_Small-intestine-related |
| 1416262_at   | Tmem19   | transmembrane protein 19                                                        | Cluster0002_Small-intestine-related |
| 1448275_at   | Tmem19   | transmembrane protein 19                                                        | Cluster0002_Small-intestine-related |
| 1424191_a_at | Tmem41a  | transmembrane protein 41a                                                       | Cluster0002_Small-intestine-related |
| 1451528_at   | Tmem82   | transmembrane protein 82                                                        | Cluster0002_Small-intestine-related |
| 1436974_at   | Tmem88b  | transmembrane protein 88B                                                       | Cluster0002_Small-intestine-related |
| 1449969_at   | Tmod4    | tropomodulin 4                                                                  | Cluster0002_Small-intestine-related |

|              |               |                                                       |                                     |
|--------------|---------------|-------------------------------------------------------|-------------------------------------|
| 1421510_at   | Tmprss15      | transmembrane protease, serine 15                     | Cluster0002_Small-intestine-related |
| 1455256_at   | Tnik          | TRAF2 and NCK interacting kinase                      | Cluster0002_Small-intestine-related |
| 1422721_at   | Tnk1          | tyrosine kinase, non-receptor, 1                      | Cluster0002_Small-intestine-related |
| 1425634_a_at | Tnk1          | tyrosine kinase, non-receptor, 1                      | Cluster0002_Small-intestine-related |
| 1434385_at   | Tom112        | target of myb1-like 2 (chicken)                       | Cluster0002_Small-intestine-related |
| 1449430_a_at | Treh          | trehalase (brush-border membrane glycoprotein)        | Cluster0002_Small-intestine-related |
| 1425308_at   | Trim31        | tripartite motif-containing 31                        | Cluster0002_Small-intestine-related |
| 1440230_at   | Tsku          | tsukushin                                             | Cluster0002_Small-intestine-related |
| 1450133_at   | Ugt2a3        | UDP glucuronosyltransferase 2 family, polypeptide A3  | Cluster0002_Small-intestine-related |
| 1439624_at   | Ugt2b35       | UDP glucuronosyltransferase 2 family, polypeptide B35 | Cluster0002_Small-intestine-related |
| 1455595_at   | Ugt2b36       | UDP glucuronosyltransferase 2 family, polypeptide B36 | Cluster0002_Small-intestine-related |
| 1419622_at   | Ugt2b5        | UDP glucuronosyltransferase 2 family, polypeptide B5  | Cluster0002_Small-intestine-related |
| 1429950_at   | Unc5cl        | unc-5 homolog C (C. elegans)-like                     | Cluster0002_Small-intestine-related |
| 1433498_at   | Urgcp         | upregulator of cell proliferation                     | Cluster0002_Small-intestine-related |
| 1450001_a_at | Ush1c         | Usher syndrome 1C homolog (human)                     | Cluster0002_Small-intestine-related |
| 1448837_at   | Vil1          | villin 1                                              | Cluster0002_Small-intestine-related |
| 1455555_at   | Vipr1         | vasoactive intestinal peptide receptor 1              | Cluster0002_Small-intestine-related |
| 1426399_at   | Vwa1          | von Willebrand factor A domain containing 1           | Cluster0002_Small-intestine-related |
| 1455301_at   | Wipf3         | WAS/WASL interacting protein family, member 3         | Cluster0002_Small-intestine-related |
| 1422443_at   | Xpnpep1       | X-prolyl aminopeptidase (aminopeptidase P) 1, soluble | Cluster0002_Small-intestine-related |
| 1416545_at   | Zdhhc7        | zinc finger, DHH domain containing 7                  | Cluster0002_Small-intestine-related |
| 1424506_at   | Zfp768        | zinc finger protein 768                               | Cluster0002_Small-intestine-related |
| 1430502_at   | Zfr2          | zinc finger RNA binding protein 2                     | Cluster0002_Small-intestine-related |
| 1424670_s_at | Zfyve21       | zinc finger, FYVE domain containing 21                | Cluster0002_Small-intestine-related |
| 1438224_at   | Zswim5        | zinc finger, SWIM domain containing 5                 | Cluster0002_Small-intestine-related |
| 1454126_at   | 0710001A04Rik | RIKEN cDNA 0710001A04 gene                            | Cluster0003_Paneth cell-related     |
| 1459810_at   | 1110008F13Rik | RIKEN cDNA 1110008F13 gene                            | Cluster0003_Paneth cell-related     |
| 1432663_at   | 1500005C15Rik | RIKEN cDNA 1500005C15 gene                            | Cluster0003_Paneth cell-related     |
| 1430070_at   | 1500035N22Rik | RIKEN cDNA 1500035N22 gene                            | Cluster0003_Paneth cell-related     |
| 1447007_at   | 1700008I05Rik | RIKEN cDNA 1700008I05 gene                            | Cluster0003_Paneth cell-related     |
| 1453460_at   | 1700012I11Rik | RIKEN cDNA 1700012I11 gene                            | Cluster0003_Paneth cell-related     |
| 1437792_at   | 1700013D24Rik | RIKEN cDNA 1700013D24 gene                            | Cluster0003_Paneth cell-related     |
| 1429645_at   | 1700017G19Rik | RIKEN cDNA 1700017G19 gene                            | Cluster0003_Paneth cell-related     |
| 1440518_at   | 1700029I01Rik | RIKEN cDNA 1700029I01 gene                            | Cluster0003_Paneth cell-related     |
| 1432395_at   | 1700039E15Rik | RIKEN cDNA 1700039E15 gene                            | Cluster0003_Paneth cell-related     |
| 1442131_at   | 1700048M11Rik | RIKEN cDNA 1700048M11 gene                            | Cluster0003_Paneth cell-related     |
| 1454277_at   | 1700049J03Rik | RIKEN cDNA 1700049J03 gene                            | Cluster0003_Paneth cell-related     |
| 1432772_at   | 1700081H04Rik | RIKEN cDNA 1700081H04 gene                            | Cluster0003_Paneth cell-related     |
| 1421639_at   | 1700082M22Rik | RIKEN cDNA 1700082M22 gene                            | Cluster0003_Paneth cell-related     |
| 1453679_at   | 1700100I10Rik | RIKEN cDNA 1700100I10 gene                            | Cluster0003_Paneth cell-related     |
| 1428486_at   | 1700123L14Rik | nucleoporin 50 pseudogene                             | Cluster0003_Paneth cell-related     |
| 1447902_at   | 1810013A23Rik | RIKEN cDNA 1810013A23 gene                            | Cluster0003_Paneth cell-related     |
| 1441871_at   | 1810044D09Rik | RIKEN cDNA 1810044D09 gene                            | Cluster0003_Paneth cell-related     |
| 1432261_at   | 2310039D24Rik | RIKEN cDNA 2310039D24 gene                            | Cluster0003_Paneth cell-related     |
| 1443918_at   | 2700050L05Rik | RIKEN cDNA 2700050L05 gene                            | Cluster0003_Paneth cell-related     |
| 1431482_at   | 2900012M01Rik | RIKEN cDNA 2900012M01 gene                            | Cluster0003_Paneth cell-related     |
| 1432943_at   | 2900046L07Rik | RIKEN cDNA 2900046L07 gene                            | Cluster0003_Paneth cell-related     |
| 1432887_at   | 3110048L19Rik | zinc finger pseudogene                                | Cluster0003_Paneth cell-related     |
| 1431367_at   |               | Mar-01 membrane-associated ring finger (C3HC4) 1      | Cluster0003_Paneth cell-related     |
| 1446122_at   | 4732416N19Rik | RIKEN cDNA 4732416N19 gene                            | Cluster0003_Paneth cell-related     |
| 1432224_at   | 4831407H17Rik | RIKEN cDNA 4831407H17 gene                            | Cluster0003_Paneth cell-related     |
| 1432899_at   | 4833408G04Rik | RIKEN cDNA 4833408G04 gene                            | Cluster0003_Paneth cell-related     |
| 1453292_at   | 4921501E09Rik | RIKEN cDNA 4921501E09 gene                            | Cluster0003_Paneth cell-related     |
| 1432044_a_at | 4921504E06Rik | RIKEN cDNA 4921504E06 gene                            | Cluster0003_Paneth cell-related     |
| 1433395_at   | 4921504P13Rik | RIKEN cDNA 4921504P13 gene                            | Cluster0003_Paneth cell-related     |
| 1460493_at   | 4921506J03Rik | RIKEN cDNA 4921506J03 gene                            | Cluster0003_Paneth cell-related     |
| 1431458_at   | 4921507L20Rik | RIKEN cDNA 4921507L20 gene                            | Cluster0003_Paneth cell-related     |

|              |               |                                                     |                                 |
|--------------|---------------|-----------------------------------------------------|---------------------------------|
| 1433380_at   | 4921509A06Rik | RIKEN cDNA 4921509A06 gene                          | Cluster0003_Paneth cell-related |
| 1453691_at   | 4921528I07Rik | RIKEN cDNA 4921528I07 gene                          | Cluster0003_Paneth cell-related |
| 1454470_at   | 4930404F17Rik | RIKEN cDNA 4930404F17 gene                          | Cluster0003_Paneth cell-related |
| 1454128_at   | 4930413E15Rik | RIKEN cDNA 4930413E15 gene                          | Cluster0003_Paneth cell-related |
| 1444782_at   | 4930417H01Rik | RIKEN cDNA 4930417H01 gene                          | Cluster0003_Paneth cell-related |
| 1432215_s_at | 4930417O22Rik | RIKEN cDNA 4930417O22 gene                          | Cluster0003_Paneth cell-related |
| 1433024_at   | 4930421C12Rik | RIKEN cDNA 4930421C12 gene                          | Cluster0003_Paneth cell-related |
| 1454516_at   | 4930424E08Rik | RIKEN cDNA 4930424E08 gene                          | Cluster0003_Paneth cell-related |
| 1431841_at   | 4930434E21Rik | RIKEN cDNA 4930434E21 gene                          | Cluster0003_Paneth cell-related |
| 1454509_at   | 4930444E06Rik | RIKEN cDNA 4930444E06 gene                          | Cluster0003_Paneth cell-related |
| 1433345_s_at | 4930448K20Rik | glyceraldehyde-3-phosphate dehydrogenase pseudogene | Cluster0003_Paneth cell-related |
| 1432279_at   | 4930452L02Rik | RIKEN cDNA 4930452L02 gene                          | Cluster0003_Paneth cell-related |
| 1453889_at   | 4930461C15Rik | RIKEN cDNA 4930461C15 gene                          | Cluster0003_Paneth cell-related |
| 1454068_at   | 4930470H14Rik | RIKEN cDNA 4930470H14 gene                          | Cluster0003_Paneth cell-related |
| 1454579_at   | 4930474A20Rik | RIKEN cDNA 4930474A20 gene                          | Cluster0003_Paneth cell-related |
| 1454208_at   | 4930483O08Rik | RIKEN cDNA 4930483O08 gene                          | Cluster0003_Paneth cell-related |
| 1433314_at   | 4930486A15Rik | RIKEN cDNA 4930486A15 gene                          | Cluster0003_Paneth cell-related |
| 1433307_at   | 4930509E22Rik | RIKEN cDNA 4930509E22 gene                          | Cluster0003_Paneth cell-related |
| 1454553_at   | 4930509E22Rik | RIKEN cDNA 4930509E22 gene                          | Cluster0003_Paneth cell-related |
| 1431460_at   | 4930519D14Rik | RIKEN cDNA 4930519D14 gene                          | Cluster0003_Paneth cell-related |
| 1433320_at   | 4930519N06Rik | RIKEN cDNA 4930519N06 gene                          | Cluster0003_Paneth cell-related |
| 1421576_at   | 4930524B15Rik | RIKEN cDNA 4930524B15 gene                          | Cluster0003_Paneth cell-related |
| 1432433_at   | 4930524N10Rik | RIKEN cDNA 4930524N10 gene                          | Cluster0003_Paneth cell-related |
| 1454346_at   | 4930540E01Rik | RIKEN cDNA 4930540E01 gene                          | Cluster0003_Paneth cell-related |
| 1422689_at   | 4930547C10Rik | RIKEN cDNA 4930547C10 gene                          | Cluster0003_Paneth cell-related |
| 1432761_at   | 4930551I15Rik | RIKEN cDNA 4930551I15 gene                          | Cluster0003_Paneth cell-related |
| 1429931_at   | 4930553P18Rik | RIKEN cDNA 4930553P18 gene                          | Cluster0003_Paneth cell-related |
| 1454239_at   | 4930578G10Rik | RIKEN cDNA 4930578G10 gene                          | Cluster0003_Paneth cell-related |
| 1432368_at   | 4930594M17Rik | RIKEN cDNA 4930594M17 gene                          | Cluster0003_Paneth cell-related |
| 1430433_at   | 4933406J08Rik | RIKEN cDNA 4933406J08 gene                          | Cluster0003_Paneth cell-related |
| 1460527_at   | 4933407C09Rik | RIKEN cDNA 4933407C09 gene                          | Cluster0003_Paneth cell-related |
| 1431908_at   | 4933408J17Rik | RIKEN cDNA 4933408J17 gene                          | Cluster0003_Paneth cell-related |
| 1432010_at   | 4933408N05Rik | RIKEN cDNA 4933408N05 gene                          | Cluster0003_Paneth cell-related |
| 1431555_at   | 4933409F18Rik | RIKEN cDNA 4933409F18 gene                          | Cluster0003_Paneth cell-related |
| 1433048_at   | 4933428L01Rik | RIKEN cDNA 4933428L01 gene                          | Cluster0003_Paneth cell-related |
| 1429840_at   | 4933439G12Rik | RIKEN cDNA 4933439G12 gene                          | Cluster0003_Paneth cell-related |
| 1433253_at   | 5033423K11Rik | RIKEN cDNA 5033423K11 gene                          | Cluster0003_Paneth cell-related |
| 1454493_at   | 5033425B01Rik | RIKEN cDNA 5033425B01 gene                          | Cluster0003_Paneth cell-related |
| 1433233_at   | 5430425E15Rik | RIKEN cDNA 5430425E15 gene                          | Cluster0003_Paneth cell-related |
| 1432915_at   | 5730407I07Rik | RIKEN cDNA 5730407I07 gene                          | Cluster0003_Paneth cell-related |
| 1432941_at   | 5730408A14Rik | RIKEN cDNA 5730408A14 gene                          | Cluster0003_Paneth cell-related |
| 1432721_at   | 5830424K16Rik | RIKEN cDNA 5830424K16 gene                          | Cluster0003_Paneth cell-related |
| 1454323_at   | 5830433D23Rik | RIKEN cDNA 5830433D23 gene                          | Cluster0003_Paneth cell-related |
| 1433060_at   | 6230426I18Rik | RIKEN cDNA 6230426I18 gene                          | Cluster0003_Paneth cell-related |
| 1437881_at   | 6330416L07Rik | RIKEN cDNA 6330416L07 gene                          | Cluster0003_Paneth cell-related |
| 1433157_at   | 6330562C20Rik | RIKEN cDNA 6330562C20 gene                          | Cluster0003_Paneth cell-related |
| 1454483_at   | 6330590E21Rik | RIKEN cDNA 6330590E21 gene                          | Cluster0003_Paneth cell-related |
| 1432644_at   | 6430711C07Rik | RIKEN cDNA 6430711C07 gene                          | Cluster0003_Paneth cell-related |
| 1446586_at   | 8030463A06Rik | RIKEN cDNA 8030463A06 gene                          | Cluster0003_Paneth cell-related |
| 1439844_at   | 8430426J06Rik | RIKEN cDNA 8430426J06 gene                          | Cluster0003_Paneth cell-related |
| 1429917_at   | 9030625N01Rik | RIKEN cDNA 9030625N01 gene                          | Cluster0003_Paneth cell-related |
| 1431641_at   | 9330161L09Rik | RIKEN cDNA 9330161L09 gene                          | Cluster0003_Paneth cell-related |
| 1454512_at   | 9430018C23Rik | RIKEN cDNA 9430018C23 gene                          | Cluster0003_Paneth cell-related |
| 1442179_at   | 9430053O09Rik | RIKEN cDNA 9430053O09 gene                          | Cluster0003_Paneth cell-related |
| 1430965_at   | 9430064K01Rik | RIKEN cDNA 9430064K01 gene                          | Cluster0003_Paneth cell-related |
| 1458881_at   | 9530001P21Rik | RIKEN cDNA 9530001P21 gene                          | Cluster0003_Paneth cell-related |
| 1442425_at   | A030014E15Rik | RIKEN cDNA A030014E15 gene                          | Cluster0003_Paneth cell-related |

|              |               |                                                                          |                                 |
|--------------|---------------|--------------------------------------------------------------------------|---------------------------------|
| 1446676_at   | A130033P14    | hypothetical protein A130033P14                                          | Cluster0003_Paneth cell-related |
| 1447735_x_at | A2bp1         | ataxin 2 binding protein 1                                               | Cluster0003_Paneth cell-related |
| 1458799_at   | A33003J07Rik  | RIKEN cDNA A33003J07 gene                                                | Cluster0003_Paneth cell-related |
| 1433272_at   | A430110A21Rik | RIKEN cDNA A430110A21 gene                                               | Cluster0003_Paneth cell-related |
| 1446677_at   | A830029E22Rik | RIKEN cDNA A830029E22 gene                                               | Cluster0003_Paneth cell-related |
| 1457388_at   | A830080L01Rik | RIKEN cDNA A830080L01 gene                                               | Cluster0003_Paneth cell-related |
| 1431529_at   | A930002H02Rik | RIKEN cDNA A930002H02 gene                                               | Cluster0003_Paneth cell-related |
| 1438777_a_at | AA881470      | EST AA881470                                                             | Cluster0003_Paneth cell-related |
| 1433064_at   | Acot12        | acyl-CoA thioesterase 12                                                 | Cluster0003_Paneth cell-related |
| 1418878_at   | Acrv1         | acrosomal vesicle protein 1                                              | Cluster0003_Paneth cell-related |
| 1458197_x_at | Adam1a        | a disintegrin and metalloproteinase domain 1a                            | Cluster0003_Paneth cell-related |
| 1422116_at   | Aff2          | AF4/FMR2 family, member 2                                                | Cluster0003_Paneth cell-related |
| 1438308_at   | Agbl4         | ATP/GTP binding protein-like 4                                           | Cluster0003_Paneth cell-related |
| 1429866_at   | Ahnak         | AHNAK nucleoprotein (desmoyokin)                                         | Cluster0003_Paneth cell-related |
| 1425771_at   | Akr1d1        | aldo-keto reductase family 1, member D1                                  | Cluster0003_Paneth cell-related |
| 1427337_at   | Aldh8a1       | aldehyde dehydrogenase 8 family, member A1                               | Cluster0003_Paneth cell-related |
| 1443291_at   | Ank1          | ankyrin 1, erythroid                                                     | Cluster0003_Paneth cell-related |
| 1435199_at   | Apc2          | adenomatosis polyposis coli 2                                            | Cluster0003_Paneth cell-related |
| 1456007_at   | Arf3          | ADP-ribosylation factor 3                                                | Cluster0003_Paneth cell-related |
| 1457655_x_at | Arhgap27      | Rho GTPase activating protein 27                                         | Cluster0003_Paneth cell-related |
| 1429789_at   | Arpm1         | actin related protein M1                                                 | Cluster0003_Paneth cell-related |
| 1451553_at   | Art5          | ADP-ribosyltransferase 5                                                 | Cluster0003_Paneth cell-related |
| 1425275_at   | Asph          | aspartate-beta-hydroxylase                                               | Cluster0003_Paneth cell-related |
| 1425653_at   | Atf7          | activating transcription factor 7                                        | Cluster0003_Paneth cell-related |
| 1457650_x_at | Atg4a         | autophagy-related 4A (yeast)                                             | Cluster0003_Paneth cell-related |
| 1455949_at   | Atp1b1        | ATPase, Na <sup>+</sup> /K <sup>+</sup> transporting, beta 1 polypeptide | Cluster0003_Paneth cell-related |
| 1425838_at   | Atp9a         | ATPase, class II, type 9A                                                | Cluster0003_Paneth cell-related |
| 1458762_at   | AU015230      | expressed sequence AU015230                                              | Cluster0003_Paneth cell-related |
| 1443607_at   | AU020745      | expressed sequence AU020745                                              | Cluster0003_Paneth cell-related |
| 1445120_at   | AU021977      | expressed sequence AU021977                                              | Cluster0003_Paneth cell-related |
| 1446766_at   | AU022746      | expressed sequence AU022746                                              | Cluster0003_Paneth cell-related |
| 1446432_at   | B530045E10Rik | RIKEN cDNA B530045E10 gene                                               | Cluster0003_Paneth cell-related |
| 1432760_at   | Bat2l2        | HLA-B associated transcript 2-like 2                                     | Cluster0003_Paneth cell-related |
| 1438901_at   | BC024814      | cDNA sequence BC024814                                                   | Cluster0003_Paneth cell-related |
| 1425823_at   | BC026782      | cDNA sequence BC026782                                                   | Cluster0003_Paneth cell-related |
| 1459829_x_at | BC031781      | CDNA sequence BC031781                                                   | Cluster0003_Paneth cell-related |
| 1439446_at   | BC048507      | cDNA sequence BC048507                                                   | Cluster0003_Paneth cell-related |
| 1444497_at   | BC059050      | cDNA sequence BC059050                                                   | Cluster0003_Paneth cell-related |
| 1422265_at   | Brs3          | bombesin-like receptor 3                                                 | Cluster0003_Paneth cell-related |
| 1433333_at   | C030004M13Rik | RIKEN cDNA C030004M13 gene                                               | Cluster0003_Paneth cell-related |
| 1456958_at   | C230072F16Rik | RIKEN cDNA C230072F16 gene                                               | Cluster0003_Paneth cell-related |
| 1431497_at   | C330022C24Rik | RIKEN cDNA C330022C24 gene                                               | Cluster0003_Paneth cell-related |
| 1447082_at   | C630004L07Rik | RIKEN cDNA C630004L07 gene                                               | Cluster0003_Paneth cell-related |
| 1447990_at   | C76332        | expressed sequence C76332                                                | Cluster0003_Paneth cell-related |
| 1448088_at   | C78228        | expressed sequence C78228                                                | Cluster0003_Paneth cell-related |
| 1446018_at   | C79240        | expressed sequence C79240                                                | Cluster0003_Paneth cell-related |
| 1445910_at   | C79999        | expressed sequence C79999                                                | Cluster0003_Paneth cell-related |
| 1447507_at   | C80406        | expressed sequence C80406                                                | Cluster0003_Paneth cell-related |
| 1445810_at   | C85163        | expressed sequence C85163                                                | Cluster0003_Paneth cell-related |
| 1431288_at   | Car10         | carbonic anhydrase 10                                                    | Cluster0003_Paneth cell-related |
| 1447762_x_at | Car12         | carbonic anhydrase 12                                                    | Cluster0003_Paneth cell-related |
| 1443824_s_at | Car7          | carbonic anhydrase 7                                                     | Cluster0003_Paneth cell-related |
| 1425852_at   | Catsperg1     | cation channel, sperm-associated, gamma 1                                | Cluster0003_Paneth cell-related |
| 1421932_at   | Cbx5          | chromobox homolog 5 (Drosophila HP1a)                                    | Cluster0003_Paneth cell-related |
| 1419986_at   | Ccdc69        | Coiled-coil domain containing 69                                         | Cluster0003_Paneth cell-related |
| 1455568_at   | Ccdc74a       | coiled-coil domain containing 74A                                        | Cluster0003_Paneth cell-related |
| 1453923_at   | Ccdc83        | coiled-coil domain containing 83                                         | Cluster0003_Paneth cell-related |

|              |                         |                                                                                                          |                                 |
|--------------|-------------------------|----------------------------------------------------------------------------------------------------------|---------------------------------|
| 1430670_at   | Ccdc91                  | coiled-coil domain containing 91                                                                         | Cluster0003_Paneth cell-related |
| 1446482_at   | Cep63                   | centrosomal protein 63                                                                                   | Cluster0003_Paneth cell-related |
| 1447036_at   | Chl1                    | cell adhesion molecule with homology to L1CAM                                                            | Cluster0003_Paneth cell-related |
| 1456354_at   | Chrna4                  | cholinergic receptor, nicotinic, alpha polypeptide 4                                                     | Cluster0003_Paneth cell-related |
| 1440356_at   | Ciapin1                 | cytokine induced apoptosis inhibitor 1                                                                   | Cluster0003_Paneth cell-related |
| 1457546_at   | Cnot1                   | CCR4-NOT transcription complex, subunit 1                                                                | Cluster0003_Paneth cell-related |
| 1430676_at   | Col19a1                 | collagen, type XIX, alpha 1                                                                              | Cluster0003_Paneth cell-related |
| 1424606_at   | Cplx3                   | complexin 3                                                                                              | Cluster0003_Paneth cell-related |
| 1441330_at   | Crb1                    | crumbs homolog 1 (Drosophila)                                                                            | Cluster0003_Paneth cell-related |
| 1446533_at   | Crtc1                   | CREB regulated transcription coactivator 1                                                               | Cluster0003_Paneth cell-related |
| 1449185_at   | Crx                     | cone-rod homeobox containing gene                                                                        | Cluster0003_Paneth cell-related |
| 1449285_at   | Cst9                    | cystatin 9                                                                                               | Cluster0003_Paneth cell-related |
| 1419590_at   | Cyp2b9 /// LOC100047700 | cytochrome P450, family 2, subfamily b, polypeptide 9 /// similar to testosterone 16a-hydroxylase type a | Cluster0003_Paneth cell-related |
| 1430814_at   | Cyp2d40                 | cytochrome P450, family 2, subfamily d, polypeptide 40                                                   | Cluster0003_Paneth cell-related |
| 1449759_at   | D11ErtD326e             | DNA segment, Chr 11, ERATO Doi 326, expressed                                                            | Cluster0003_Paneth cell-related |
| 1445927_at   | D13ErtD212e             | DNA segment, Chr 13, ERATO Doi 212, expressed                                                            | Cluster0003_Paneth cell-related |
| 1448091_at   | D15ErtD50e              | DNA segment, Chr 15, ERATO Doi 50, expressed                                                             | Cluster0003_Paneth cell-related |
| 1445953_at   | D17ErtD191e             | DNA segment, Chr 17, ERATO Doi 191, expressed                                                            | Cluster0003_Paneth cell-related |
| 1459246_at   | D230021J17Rik           | RIKEN cDNA D230021J17 gene                                                                               | Cluster0003_Paneth cell-related |
| 1441160_at   | D330050G23Rik           | RIKEN cDNA D330050G23 gene                                                                               | Cluster0003_Paneth cell-related |
| 1460161_at   | D5ErtD422e              | DNA segment, Chr 5, ERATO Doi 422, expressed                                                             | Cluster0003_Paneth cell-related |
| 1445183_s_at | D7ErtD523e              | DNA segment, Chr 7, ERATO Doi 523, expressed                                                             | Cluster0003_Paneth cell-related |
| 1445078_at   | D7ErtD526e              | DNA segment, Chr 7, ERATO Doi 526, expressed                                                             | Cluster0003_Paneth cell-related |
| 1444996_at   | Depdc5                  | DEP domain containing 5                                                                                  | Cluster0003_Paneth cell-related |
| 1458843_at   | Depdc5                  | DEP domain containing 5                                                                                  | Cluster0003_Paneth cell-related |
| 1438799_at   | Dlx6os1                 | Dlx6 opposite strand transcript 1                                                                        | Cluster0003_Paneth cell-related |
| 1431360_s_at | Dmrtc1a                 | DMRT-like family C1a                                                                                     | Cluster0003_Paneth cell-related |
| 1447641_at   | Dmwd                    | dystrophia myotonica-containing WD repeat motif                                                          | Cluster0003_Paneth cell-related |
| 1445829_at   | Dnhd1                   | dynein heavy chain domain 1                                                                              | Cluster0003_Paneth cell-related |
| 1445705_x_at | Dpp8                    | dipeptidylpeptidase 8                                                                                    | Cluster0003_Paneth cell-related |
| 1447677_x_at | Dtd1 /// LOC100048650   | D-tyrosyl-tRNA deacylase 1 homolog (S. cerevisiae) /// similar to D-tyrosyl-tRNA deacylase 1             | Cluster0003_Paneth cell-related |
| 1442768_at   | E130112L23Rik           | RIKEN cDNA E130112L23 gene                                                                               | Cluster0003_Paneth cell-related |
| 1419724_at   | Edar                    | ectodysplasin-A receptor                                                                                 | Cluster0003_Paneth cell-related |
| 1456613_at   | Eif4ebp2                | eukaryotic translation initiation factor 4E binding protein 2                                            | Cluster0003_Paneth cell-related |
| 1433052_at   | Elavl2                  | ELAV (embryonic lethal, abnormal vision, Drosophila)-like 2 (Hu antigen B)                               | Cluster0003_Paneth cell-related |
| 1432235_at   | Epsti1                  | epithelial stromal interaction 1 (breast)                                                                | Cluster0003_Paneth cell-related |
| 1432249_a_at | Ercc8                   | excision repaircross-complementing rodent repair deficiency, complementation group 8                     | Cluster0003_Paneth cell-related |
| 1432900_at   | Etl4                    | enhancer trap locus 4                                                                                    | Cluster0003_Paneth cell-related |
| 1447884_x_at | Fam134c                 | family with sequence similarity 134, member C                                                            | Cluster0003_Paneth cell-related |
| 1430736_at   | Fam38b                  | family with sequence similarity 38, member B                                                             | Cluster0003_Paneth cell-related |
| 1440376_at   | Fbxo41                  | F-box protein 41                                                                                         | Cluster0003_Paneth cell-related |
| 1427846_x_at | Fgfr4                   | fibroblast growth factor receptor 4                                                                      | Cluster0003_Paneth cell-related |
| 1459808_at   | Fkbp4                   | FK506 binding protein 4                                                                                  | Cluster0003_Paneth cell-related |
| 1421536_at   | Gabrq                   | gamma-aminobutyric acid (GABA) A receptor, subunit theta                                                 | Cluster0003_Paneth cell-related |
| 1443753_at   | Galns                   | Galactosamine (N-acetyl)-6-sulfate sulfatase                                                             | Cluster0003_Paneth cell-related |
| 1429147_at   | Gas2                    | growth arrest specific 2                                                                                 | Cluster0003_Paneth cell-related |
| 1450127_a_at | Gcgr                    | glucagon receptor                                                                                        | Cluster0003_Paneth cell-related |
| 1426591_at   | Gfm2                    | G elongation factor, mitochondrial 2                                                                     | Cluster0003_Paneth cell-related |
| 1451856_at   | Gigyf2                  | GRB10 interacting GYF protein 2                                                                          | Cluster0003_Paneth cell-related |
| 1460095_at   | Giyd2                   | GIY-YIG domain containing 2                                                                              | Cluster0003_Paneth cell-related |
| 1449726_at   | Glrx3 /// Gm12669       | glutaredoxin 3 /// predicted gene 12669                                                                  | Cluster0003_Paneth cell-related |
| 1441508_at   | Gm10114                 | predicted gene 10114                                                                                     | Cluster0003_Paneth cell-related |
| 1447938_at   | Gm10590 /// Gm2172      | predicted gene 10590 /// predicted gene 2172                                                             | Cluster0003_Paneth cell-related |
| 1441468_at   | Gm10710                 | predicted gene 10710                                                                                     | Cluster0003_Paneth cell-related |
| 1444850_at   | Gm12169                 | predicted gene 12169                                                                                     | Cluster0003_Paneth cell-related |
| 1444616_x_at | Gm2380                  | predicted gene 2380                                                                                      | Cluster0003_Paneth cell-related |
| 1437518_at   | Gm2694                  | predicted gene 2694                                                                                      | Cluster0003_Paneth cell-related |

|              |                           |                                                                                          |                                 |
|--------------|---------------------------|------------------------------------------------------------------------------------------|---------------------------------|
| 1447427_at   | Gm2717                    | Predicted gene 2717                                                                      | Cluster0003_Paneth cell-related |
| 1441000_at   | Gm4926                    | T-cell immunoglobulin and mucin domain containing 2 pseudogene                           | Cluster0003_Paneth cell-related |
| 1449775_x_at | Gm5866 /// Slc35a4        | predicted gene 5866 /// solute carrier family 35, member A4                              | Cluster0003_Paneth cell-related |
| 1439338_at   | Gm6150                    | predicted gene 6150                                                                      | Cluster0003_Paneth cell-related |
| 1447327_at   | Gm8002 /// Gm8016         | predicted gene 8002 /// predicted gene 8016                                              | Cluster0003_Paneth cell-related |
| 1449651_x_at | Gm9222                    | Predicted gene 9222                                                                      | Cluster0003_Paneth cell-related |
| 1433135_at   | Golgb1                    | golgi autoantigen, golgin subfamily b, macrogolgin 1                                     | Cluster0003_Paneth cell-related |
| 1447485_at   | Gpr150                    | G protein-coupled receptor 150                                                           | Cluster0003_Paneth cell-related |
| 1420698_at   | Gpx5                      | glutathione peroxidase 5                                                                 | Cluster0003_Paneth cell-related |
| 1431344_at   | Grm2                      | glutamate receptor, metabotropic 2                                                       | Cluster0003_Paneth cell-related |
| 1457299_at   | Grm4                      | glutamate receptor, metabotropic 4                                                       | Cluster0003_Paneth cell-related |
| 1432257_at   | Gsdmcl1                   | gasdermin C-like 1                                                                       | Cluster0003_Paneth cell-related |
| 1457975_at   | Gtpbp3                    | GTP binding protein 3                                                                    | Cluster0003_Paneth cell-related |
| 1441954_s_at | H1fnt                     | H1 histone family, member N, testis-specific                                             | Cluster0003_Paneth cell-related |
| 1436756_x_at | Hadh                      | hydroxyacyl-Coenzyme A dehydrogenase                                                     | Cluster0003_Paneth cell-related |
| 1432523_at   | Hipk2                     | homeodomain interacting protein kinase 2                                                 | Cluster0003_Paneth cell-related |
| 1452421_at   | Hoxa3                     | homeobox A3                                                                              | Cluster0003_Paneth cell-related |
| 1444712_at   | Hsf5                      | heat shock transcription factor family member 5                                          | Cluster0003_Paneth cell-related |
| 1450219_at   | Htr1a                     | 5-hydroxytryptamine (serotonin) receptor 1A                                              | Cluster0003_Paneth cell-related |
| 1450477_at   | Htr2c                     | 5-hydroxytryptamine (serotonin) receptor 2C                                              | Cluster0003_Paneth cell-related |
| 1431762_at   | Htra3                     | Htra serine peptidase 3                                                                  | Cluster0003_Paneth cell-related |
| 1457165_at   | Ick                       | intestinal cell kinase                                                                   | Cluster0003_Paneth cell-related |
| 1421672_at   | Il17a                     | interleukin 17A                                                                          | Cluster0003_Paneth cell-related |
| 1433267_at   | Ing1                      | inhibitor of growth family, member 1                                                     | Cluster0003_Paneth cell-related |
| 1459621_at   | Itns1                     | intersectin 1 (SH3 domain protein 1A)                                                    | Cluster0003_Paneth cell-related |
| 1443724_at   | Jph3                      | junctophilin 3                                                                           | Cluster0003_Paneth cell-related |
| 1421568_at   | Kcna6                     | potassium voltage-gated channel, shaker-related, subfamily, member 6                     | Cluster0003_Paneth cell-related |
| 1450490_at   | Kcna7                     | potassium voltage-gated channel, shaker-related subfamily, member 7                      | Cluster0003_Paneth cell-related |
| 1426070_a_at | Kcnd3                     | potassium voltage-gated channel, Shal-related family, member 3                           | Cluster0003_Paneth cell-related |
| 1425707_a_at | Kcnj6                     | potassium inwardly-rectifying channel, subfamily J, member 6                             | Cluster0003_Paneth cell-related |
| 1421401_at   | Kcnmb1                    | potassium large conductance calcium-activated channel, subfamily M, beta member 1        | Cluster0003_Paneth cell-related |
| 1447236_at   | Kif21a                    | kinesin family member 21A                                                                | Cluster0003_Paneth cell-related |
| 1452723_at   | Klf9                      | Kruppel-like factor 9                                                                    | Cluster0003_Paneth cell-related |
| 1455573_at   | Krt14                     | keratin 14                                                                               | Cluster0003_Paneth cell-related |
| 1427378_at   | Krt75                     | keratin 75                                                                               | Cluster0003_Paneth cell-related |
| 1450535_at   | Krtap12-1                 | keratin associated protein 12-1                                                          | Cluster0003_Paneth cell-related |
| 1428007_at   | Krtap13-1                 | keratin associated protein 13-1                                                          | Cluster0003_Paneth cell-related |
| 1426203_at   | Krtap16-4                 | keratin associated protein 16-4                                                          | Cluster0003_Paneth cell-related |
| 1430296_at   | Krtap31-1                 | keratin associated protein 31-1                                                          | Cluster0003_Paneth cell-related |
| 1431650_at   | Krtap4-6                  | keratin associated protein 4-6                                                           | Cluster0003_Paneth cell-related |
| 1443096_at   | Lca5l                     | Leber congenital amaurosis 5-like                                                        | Cluster0003_Paneth cell-related |
| 1420350_at   | Lce1a2                    | late cornified envelope 1A2                                                              | Cluster0003_Paneth cell-related |
| 1449902_at   | Lce1c /// Lce1f /// Lce1g | late cornified envelope 1C /// late cornified envelope 1F /// late cornified envelope 1G | Cluster0003_Paneth cell-related |
| 1420550_at   | Lce1f                     | late cornified envelope 1F                                                               | Cluster0003_Paneth cell-related |
| 1429935_at   | Lcn12                     | lipocalin 12                                                                             | Cluster0003_Paneth cell-related |
| 1443076_at   | Letm2                     | leucine zipper-EF-hand containing transmembrane protein 2                                | Cluster0003_Paneth cell-related |
| 1445677_x_at | LOC100048307 /// Slc35f2  | similar to Solute carrier family 35, member F2 /// solute carrier family 35, member F2   | Cluster0003_Paneth cell-related |
| 1460461_at   | Lpcat2b                   | lysophosphatidylcholine acyltransferase 2B                                               | Cluster0003_Paneth cell-related |
| 1419928_at   | Lrig1                     | leucine-rich repeats and immunoglobulin-like domains 1                                   | Cluster0003_Paneth cell-related |
| 1443058_at   | MacroD2                   | MACRO domain containing 2                                                                | Cluster0003_Paneth cell-related |
| 1458221_at   | Mamld1                    | mastermind-like domain containing 1                                                      | Cluster0003_Paneth cell-related |
| 1457237_at   | Mbnl2                     | Muscleblind-like 2                                                                       | Cluster0003_Paneth cell-related |
| 1431709_at   | Mtl5                      | metallothionein-like 5, testis-specific (tesmin)                                         | Cluster0003_Paneth cell-related |
| 1430893_at   | Mup10                     | major urinary protein 10                                                                 | Cluster0003_Paneth cell-related |
| 1446405_at   | Myst3                     | MYST histone acetyltransferase (monocytic leukemia) 3                                    | Cluster0003_Paneth cell-related |
| 1460111_at   | Myt1l                     | myelin transcription factor 1-like                                                       | Cluster0003_Paneth cell-related |
| 1419965_at   | NA                        | ---                                                                                      | Cluster0003_Paneth cell-related |



|              |    |     |                                 |
|--------------|----|-----|---------------------------------|
| 1420041_at   | NA | --- | Cluster0003_Paneth cell-related |
| 1420076_at   | NA | --- | Cluster0003_Paneth cell-related |
| 1420145_at   | NA | --- | Cluster0003_Paneth cell-related |
| 1420211_at   | NA | --- | Cluster0003_Paneth cell-related |
| 1420231_at   | NA | --- | Cluster0003_Paneth cell-related |
| 1420241_at   | NA | --- | Cluster0003_Paneth cell-related |
| 1420254_at   | NA | --- | Cluster0003_Paneth cell-related |
| 1420264_at   | NA | --- | Cluster0003_Paneth cell-related |
| 1420288_at   | NA | --- | Cluster0003_Paneth cell-related |
| 1422426_at   | NA | --- | Cluster0003_Paneth cell-related |
| 1425720_at   | NA | --- | Cluster0003_Paneth cell-related |
| 1427621_at   | NA | --- | Cluster0003_Paneth cell-related |
| 1427641_at   | NA | --- | Cluster0003_Paneth cell-related |
| 1432645_at   | NA | --- | Cluster0003_Paneth cell-related |
| 1436464_at   | NA | --- | Cluster0003_Paneth cell-related |
| 1439536_at   | NA | --- | Cluster0003_Paneth cell-related |
| 1439625_at   | NA | --- | Cluster0003_Paneth cell-related |
| 1439822_at   | NA | --- | Cluster0003_Paneth cell-related |
| 1440367_at   | NA | --- | Cluster0003_Paneth cell-related |
| 1440670_at   | NA | --- | Cluster0003_Paneth cell-related |
| 1440682_at   | NA | --- | Cluster0003_Paneth cell-related |
| 1441194_at   | NA | --- | Cluster0003_Paneth cell-related |
| 1441222_x_at | NA | --- | Cluster0003_Paneth cell-related |
| 1441296_at   | NA | --- | Cluster0003_Paneth cell-related |
| 1441378_at   | NA | --- | Cluster0003_Paneth cell-related |
| 1441666_at   | NA | --- | Cluster0003_Paneth cell-related |
| 1441691_at   | NA | --- | Cluster0003_Paneth cell-related |
| 1441744_at   | NA | --- | Cluster0003_Paneth cell-related |
| 1441791_at   | NA | --- | Cluster0003_Paneth cell-related |
| 1442428_at   | NA | --- | Cluster0003_Paneth cell-related |
| 1442457_at   | NA | --- | Cluster0003_Paneth cell-related |
| 1442488_at   | NA | --- | Cluster0003_Paneth cell-related |
| 1442635_at   | NA | --- | Cluster0003_Paneth cell-related |
| 1442644_at   | NA | --- | Cluster0003_Paneth cell-related |
| 1442776_at   | NA | --- | Cluster0003_Paneth cell-related |
| 1442840_at   | NA | --- | Cluster0003_Paneth cell-related |
| 1442854_at   | NA | --- | Cluster0003_Paneth cell-related |
| 1442859_at   | NA | --- | Cluster0003_Paneth cell-related |
| 1443072_at   | NA | --- | Cluster0003_Paneth cell-related |
| 1443429_at   | NA | --- | Cluster0003_Paneth cell-related |
| 1443543_at   | NA | --- | Cluster0003_Paneth cell-related |
| 1443614_at   | NA | --- | Cluster0003_Paneth cell-related |
| 1443678_at   | NA | --- | Cluster0003_Paneth cell-related |
| 1443722_at   | NA | --- | Cluster0003_Paneth cell-related |
| 1443965_at   | NA | --- | Cluster0003_Paneth cell-related |
| 1444428_at   | NA | --- | Cluster0003_Paneth cell-related |
| 1444444_at   | NA | --- | Cluster0003_Paneth cell-related |
| 1444807_at   | NA | --- | Cluster0003_Paneth cell-related |
| 1444822_at   | NA | --- | Cluster0003_Paneth cell-related |
| 1444876_at   | NA | --- | Cluster0003_Paneth cell-related |
| 1444891_at   | NA | --- | Cluster0003_Paneth cell-related |
| 1444919_at   | NA | --- | Cluster0003_Paneth cell-related |
| 1444922_at   | NA | --- | Cluster0003_Paneth cell-related |
| 1445002_at   | NA | --- | Cluster0003_Paneth cell-related |
| 1445038_at   | NA | --- | Cluster0003_Paneth cell-related |
| 1445057_at   | NA | --- | Cluster0003_Paneth cell-related |
| 1445122_at   | NA | --- | Cluster0003_Paneth cell-related |

|              |    |     |                                 |
|--------------|----|-----|---------------------------------|
| 1445238_at   | NA | --- | Cluster0003_Paneth cell-related |
| 1445287_at   | NA | --- | Cluster0003_Paneth cell-related |
| 1445752_at   | NA | --- | Cluster0003_Paneth cell-related |
| 1445835_at   | NA | --- | Cluster0003_Paneth cell-related |
| 1445932_at   | NA | --- | Cluster0003_Paneth cell-related |
| 1445935_at   | NA | --- | Cluster0003_Paneth cell-related |
| 1445962_at   | NA | --- | Cluster0003_Paneth cell-related |
| 1445994_at   | NA | --- | Cluster0003_Paneth cell-related |
| 1446043_at   | NA | --- | Cluster0003_Paneth cell-related |
| 1446046_at   | NA | --- | Cluster0003_Paneth cell-related |
| 1446067_at   | NA | --- | Cluster0003_Paneth cell-related |
| 1446233_at   | NA | --- | Cluster0003_Paneth cell-related |
| 1446283_at   | NA | --- | Cluster0003_Paneth cell-related |
| 1446312_at   | NA | --- | Cluster0003_Paneth cell-related |
| 1446382_at   | NA | --- | Cluster0003_Paneth cell-related |
| 1446487_at   | NA | --- | Cluster0003_Paneth cell-related |
| 1446651_at   | NA | --- | Cluster0003_Paneth cell-related |
| 1446764_at   | NA | --- | Cluster0003_Paneth cell-related |
| 1446808_at   | NA | --- | Cluster0003_Paneth cell-related |
| 1446824_at   | NA | --- | Cluster0003_Paneth cell-related |
| 1446849_at   | NA | --- | Cluster0003_Paneth cell-related |
| 1446853_at   | NA | --- | Cluster0003_Paneth cell-related |
| 1446924_at   | NA | --- | Cluster0003_Paneth cell-related |
| 1446980_at   | NA | --- | Cluster0003_Paneth cell-related |
| 1446996_at   | NA | --- | Cluster0003_Paneth cell-related |
| 1447681_x_at | NA | --- | Cluster0003_Paneth cell-related |
| 1447699_at   | NA | --- | Cluster0003_Paneth cell-related |
| 1447916_at   | NA | --- | Cluster0003_Paneth cell-related |
| 1453936_at   | NA | --- | Cluster0003_Paneth cell-related |
| 1454398_at   | NA | --- | Cluster0003_Paneth cell-related |
| 1454407_at   | NA | --- | Cluster0003_Paneth cell-related |
| 1454583_at   | NA | --- | Cluster0003_Paneth cell-related |
| 1455690_at   | NA | --- | Cluster0003_Paneth cell-related |
| 1457077_at   | NA | --- | Cluster0003_Paneth cell-related |
| 1457095_at   | NA | --- | Cluster0003_Paneth cell-related |
| 1457201_at   | NA | --- | Cluster0003_Paneth cell-related |
| 1457217_at   | NA | --- | Cluster0003_Paneth cell-related |
| 1457340_at   | NA | --- | Cluster0003_Paneth cell-related |
| 1457974_at   | NA | --- | Cluster0003_Paneth cell-related |
| 1457986_at   | NA | --- | Cluster0003_Paneth cell-related |
| 1458008_at   | NA | --- | Cluster0003_Paneth cell-related |
| 1458029_at   | NA | --- | Cluster0003_Paneth cell-related |
| 1458131_at   | NA | --- | Cluster0003_Paneth cell-related |
| 1458162_at   | NA | --- | Cluster0003_Paneth cell-related |
| 1458337_at   | NA | --- | Cluster0003_Paneth cell-related |
| 1458349_s_at | NA | --- | Cluster0003_Paneth cell-related |
| 1458357_x_at | NA | --- | Cluster0003_Paneth cell-related |
| 1458437_at   | NA | --- | Cluster0003_Paneth cell-related |
| 1458606_at   | NA | --- | Cluster0003_Paneth cell-related |
| 1458732_at   | NA | --- | Cluster0003_Paneth cell-related |
| 1458851_at   | NA | --- | Cluster0003_Paneth cell-related |
| 1458861_at   | NA | --- | Cluster0003_Paneth cell-related |
| 1459033_at   | NA | --- | Cluster0003_Paneth cell-related |
| 1459149_at   | NA | --- | Cluster0003_Paneth cell-related |
| 1459200_at   | NA | --- | Cluster0003_Paneth cell-related |
| 1459227_at   | NA | --- | Cluster0003_Paneth cell-related |
| 1459431_at   | NA | --- | Cluster0003_Paneth cell-related |

|              |           |                                                                                                    |                                 |
|--------------|-----------|----------------------------------------------------------------------------------------------------|---------------------------------|
| 1459505_at   | NA        | ---                                                                                                | Cluster0003_Paneth cell-related |
| 1459514_at   | NA        | ---                                                                                                | Cluster0003_Paneth cell-related |
| 1459645_at   | NA        | ---                                                                                                | Cluster0003_Paneth cell-related |
| 1459939_at   | NA        | ---                                                                                                | Cluster0003_Paneth cell-related |
| 1459969_x_at | NA        | ---                                                                                                | Cluster0003_Paneth cell-related |
| 1460119_at   | NA        | ---                                                                                                | Cluster0003_Paneth cell-related |
| 1460158_at   | NA        | ---                                                                                                | Cluster0003_Paneth cell-related |
| 1458344_at   | Nagpa     | N-acetylglucosamine-1-phosphodiester alpha-N-acetylglucosaminidase                                 | Cluster0003_Paneth cell-related |
| 1418995_at   | Neurod2   | neurogenic differentiation 2                                                                       | Cluster0003_Paneth cell-related |
| 1418055_at   | Neurod4   | neurogenic differentiation 4                                                                       | Cluster0003_Paneth cell-related |
| 1426032_at   | Nfatc2    | nuclear factor of activated T-cells, cytoplasmic, calcineurin-dependent 2                          | Cluster0003_Paneth cell-related |
| 1425943_at   | Nmur2     | neuromedin U receptor 2                                                                            | Cluster0003_Paneth cell-related |
| 1429341_at   | Oaz3      | ornithine decarboxylase antizyme 3                                                                 | Cluster0003_Paneth cell-related |
| 1422365_at   | Olf17     | olfactory receptor 17                                                                              | Cluster0003_Paneth cell-related |
| 1422370_at   | Olf49     | olfactory receptor 49                                                                              | Cluster0003_Paneth cell-related |
| 1420419_a_at | Otof      | otoferlin                                                                                          | Cluster0003_Paneth cell-related |
| 1420797_at   | Otog      | otogelin                                                                                           | Cluster0003_Paneth cell-related |
| 1443043_at   | Otop2     | otopetrin 2                                                                                        | Cluster0003_Paneth cell-related |
| 1421988_at   | Papss2    | 3-phosphoadenosine 5-phosphosulfate synthase 2                                                     | Cluster0003_Paneth cell-related |
| 1443476_at   | Pax1      | Paired box gene 1                                                                                  | Cluster0003_Paneth cell-related |
| 1454380_at   | Phactr4   | phosphatase and actin regulator 4                                                                  | Cluster0003_Paneth cell-related |
| 1458321_at   | Pik3cd    | phosphatidylinositol 3-kinase catalytic delta polypeptide                                          | Cluster0003_Paneth cell-related |
| 1457105_at   | Pkd2l1    | polycystic kidney disease 2-like 1                                                                 | Cluster0003_Paneth cell-related |
| 1432928_at   | Plcd4     | phospholipase C, delta 4                                                                           | Cluster0003_Paneth cell-related |
| 1459319_at   | Pola1     | Polymerase (DNA directed), alpha 1                                                                 | Cluster0003_Paneth cell-related |
| 1431999_at   | Polr3f    | polymerase (RNA) III (DNA directed) polypeptide F                                                  | Cluster0003_Paneth cell-related |
| 1438522_at   | Pom121l12 | POM121 membrane glycoprotein-like 12                                                               | Cluster0003_Paneth cell-related |
| 1429732_at   | Ppp1r1c   | protein phosphatase 1, regulatory (inhibitor) subunit 1C                                           | Cluster0003_Paneth cell-related |
| 1444123_at   | Prdm2     | PR domain containing 2, with ZNF domain                                                            | Cluster0003_Paneth cell-related |
| 1450689_at   | Prss3     | protease, serine, 3                                                                                | Cluster0003_Paneth cell-related |
| 1432726_at   | Psmd11    | proteasome (prosome, macropain) 26S subunit, non-ATPase, 11                                        | Cluster0003_Paneth cell-related |
| 1420467_at   | Psors1c2  | psoriasis susceptibility 1 candidate 2 (human)                                                     | Cluster0003_Paneth cell-related |
| 1445445_s_at | Ptger1    | prostaglandin E receptor 1 (subtype EP1)                                                           | Cluster0003_Paneth cell-related |
| 1419991_at   | Rab3il1   | RAB3A interacting protein (rabin3)-like 1                                                          | Cluster0003_Paneth cell-related |
| 1441737_s_at | Rassf1    | Ras association (RalGDS/AF-6) domain family member 1                                               | Cluster0003_Paneth cell-related |
| 1450433_at   | Rbpjl     | recombination signal binding protein for immunoglobulin kappa J region-like                        | Cluster0003_Paneth cell-related |
| 1447634_x_at | Rcbtb2    | regulator of chromosome condensation (RCC1) and BTB (POZ) domain containing protein 2              | Cluster0003_Paneth cell-related |
| 1457651_x_at | Rem2      | rad and gem related GTP binding protein 2                                                          | Cluster0003_Paneth cell-related |
| 1441758_at   | Rhot1     | ras homolog gene family, member T1                                                                 | Cluster0003_Paneth cell-related |
| 1438950_x_at | Ric8      | resistance to inhibitors of cholinesterase 8 homolog (C. elegans)                                  | Cluster0003_Paneth cell-related |
| 1448074_at   | Rln1      | Relaxin 1                                                                                          | Cluster0003_Paneth cell-related |
| 1422543_at   | Ropn1     | ropporin, rhophilin associated protein 1                                                           | Cluster0003_Paneth cell-related |
| 1431426_at   | Rprd2     | regulation of nuclear pre-mRNA domain containing 2                                                 | Cluster0003_Paneth cell-related |
| 1425055_at   | Saps2     | SAPS domain family, member 2                                                                       | Cluster0003_Paneth cell-related |
| 1431336_at   | Scara5    | scavenger receptor class A, member 5 (putative)                                                    | Cluster0003_Paneth cell-related |
| 1456291_x_at | Scx       | scleraxis                                                                                          | Cluster0003_Paneth cell-related |
| 1421091_at   | Serpina12 | serine (or cysteine) peptidase inhibitor, clade A (alpha-1 antiproteinase, antitrypsin), member 12 | Cluster0003_Paneth cell-related |
| 1436784_x_at | Sf3b4     | splicing factor 3b, subunit 4                                                                      | Cluster0003_Paneth cell-related |
| 1421390_at   | Slc12a1   | solute carrier family 12, member 1                                                                 | Cluster0003_Paneth cell-related |
| 1439281_at   | Slc26a8   | solute carrier family 26, member 8                                                                 | Cluster0003_Paneth cell-related |
| 1440779_s_at | Slc5a9    | solute carrier family 5 (sodium/glucose cotransporter), member 9                                   | Cluster0003_Paneth cell-related |
| 1447186_at   | Slc6a16   | solute carrier family 6, member 16                                                                 | Cluster0003_Paneth cell-related |
| 1421641_at   | Slc6a2    | solute carrier family 6 (neurotransmitter transporter, noradrenalin), member 2                     | Cluster0003_Paneth cell-related |
| 1425992_at   | Slc6a5    | solute carrier family 6 (neurotransmitter transporter, glycine), member 5                          | Cluster0003_Paneth cell-related |
| 1419579_at   | Slc7a12   | solute carrier family 7 (cationic amino acid transporter, y+ system), member 12                    | Cluster0003_Paneth cell-related |
| 1430822_at   | Smarcae1  | SWI/SNF related, matrix associated, actin dependent regulator of chromatin, subfamily e, member 1  | Cluster0003_Paneth cell-related |
| 1452516_at   | Smok3a    | sperm motility kinase 3A                                                                           | Cluster0003_Paneth cell-related |

|              |               |                                                                   |                                                                   |
|--------------|---------------|-------------------------------------------------------------------|-------------------------------------------------------------------|
| 1422310_at   | Snn           | stannin                                                           | Cluster0003_Paneth cell-related                                   |
| 1443825_x_at | Spaca3        | sperm acrosome associated 3                                       | Cluster0003_Paneth cell-related                                   |
| 1459142_at   | Spag17        | sperm associated antigen 17                                       | Cluster0003_Paneth cell-related                                   |
| 1454156_at   | Spats2l       | spermatogenesis associated, serine-rich 2-like                    | Cluster0003_Paneth cell-related                                   |
| 1435999_at   | Spink8        | serine peptidase inhibitor, Kazal type 8                          | Cluster0003_Paneth cell-related                                   |
| 1449833_at   | Sprr2f        | small proline-rich protein 2F                                     | Cluster0003_Paneth cell-related                                   |
| 1453338_at   | Stam2         | signal transducing adaptor molecule (SH3 domain and ITAM motif) 2 | Cluster0003_Paneth cell-related                                   |
| 1452420_at   | Stk32b        | serine/threonine kinase 32B                                       | Cluster0003_Paneth cell-related                                   |
| 1450349_at   | Stx1b         | Syntaxin 1B                                                       | Cluster0003_Paneth cell-related                                   |
| 1419304_at   | T             | brachyury                                                         | Cluster0003_Paneth cell-related                                   |
| 1439996_at   | Tatdn1        | TatD DNase domain containing 1                                    | Cluster0003_Paneth cell-related                                   |
| 1457436_at   | Tbc1d7        | TBC1 domain family, member 7                                      | Cluster0003_Paneth cell-related                                   |
| 1440791_x_at | Tcea2         | transcription elongation factor A (SII), 2                        | Cluster0003_Paneth cell-related                                   |
| 1457133_at   | Tcerg1l       | transcription elongation regulator 1-like                         | Cluster0003_Paneth cell-related                                   |
| 1443795_at   | Tcf19         | transcription factor 19                                           | Cluster0003_Paneth cell-related                                   |
| 1421942_s_at | Tgfa          | transforming growth factor alpha                                  | Cluster0003_Paneth cell-related                                   |
| 1418766_s_at | Timd2         | T-cell immunoglobulin and mucin domain containing 2               | Cluster0003_Paneth cell-related                                   |
| 1422361_at   | Tlm           | T lymphoma oncogene                                               | Cluster0003_Paneth cell-related                                   |
| 1459210_at   | Tmem108       | transmembrane protein 108                                         | Cluster0003_Paneth cell-related                                   |
| 1444135_at   | Tmem229a      | Transmembrane protein 229A                                        | Cluster0003_Paneth cell-related                                   |
| 1430413_at   | Tmem29        | transmembrane protein 29                                          | Cluster0003_Paneth cell-related                                   |
| 1432506_at   | Tmem86b       | transmembrane protein 86B                                         | Cluster0003_Paneth cell-related                                   |
| 1421226_at   | Trem2         | triggering receptor expressed on myeloid cells 2                  | Cluster0003_Paneth cell-related                                   |
| 1440696_at   | Trnp1         | TMF1-regulated nuclear protein 1                                  | Cluster0003_Paneth cell-related                                   |
| 1432101_a_at | Tssk4         | testis-specific serine kinase 4                                   | Cluster0003_Paneth cell-related                                   |
| 1428912_at   | Ttll4         | tubulin tyrosine ligase-like family, member 4                     | Cluster0003_Paneth cell-related                                   |
| 1444638_at   | Ttn           | titin                                                             | Cluster0003_Paneth cell-related                                   |
| 1456470_x_at | Tubb2c        | tubulin, beta 2C                                                  | Cluster0003_Paneth cell-related                                   |
| 1437266_at   | Txndc2        | thioredoxin domain containing 2 (spermatzoa)                      | Cluster0003_Paneth cell-related                                   |
| 1460272_at   | Ubl4b         | ubiquitin-like 4B                                                 | Cluster0003_Paneth cell-related                                   |
| 1459934_at   | Usp42         | ubiquitin specific peptidase 42                                   | Cluster0003_Paneth cell-related                                   |
| 1451863_at   | Uts2r         | urotensin 2 receptor                                              | Cluster0003_Paneth cell-related                                   |
| 1441124_at   | Vezt          | vezatin, adherens junctions transmembrane protein                 | Cluster0003_Paneth cell-related                                   |
| 1419628_at   | Vsx2          | visual system homeobox 2                                          | Cluster0003_Paneth cell-related                                   |
| 1460622_x_at | Wdr18         | WD repeat domain 18                                               | Cluster0003_Paneth cell-related                                   |
| 1439124_at   | Wdr91         | WD repeat domain 91                                               | Cluster0003_Paneth cell-related                                   |
| 1442507_at   | Whrn          | whirlin                                                           | Cluster0003_Paneth cell-related                                   |
| 1443197_at   | Wnt9b         | wingless-type MMTV integration site 9B                            | Cluster0003_Paneth cell-related                                   |
| 1430312_at   | Wrb           | tryptophan rich basic protein                                     | Cluster0003_Paneth cell-related                                   |
| 1460076_x_at | Zfp3          | zinc finger protein 3                                             | Cluster0003_Paneth cell-related                                   |
| 1425879_at   | Zfp352        | zinc finger protein 352                                           | Cluster0003_Paneth cell-related                                   |
| 1438378_at   | 1700013G23Rik | RIKEN cDNA 1700013G23 gene                                        | Cluster0004_High in MIN-6-Pancreatic beta cell, insulin secreting |
| 1460478_at   | 2200002J24Rik | RIKEN cDNA 2200002J24 gene                                        | Cluster0004_High in MIN-6-Pancreatic beta cell, insulin secreting |
| 1430642_at   | 2900001G08Rik | RIKEN cDNA 2900001G08 gene                                        | Cluster0004_High in MIN-6-Pancreatic beta cell, insulin secreting |
| 1431703_at   | 2900027M19Rik | RIKEN cDNA 2900027M19 gene                                        | Cluster0004_High in MIN-6-Pancreatic beta cell, insulin secreting |
| 1431471_at   | 4833428M15Rik | RIKEN cDNA 4833428M15 gene                                        | Cluster0004_High in MIN-6-Pancreatic beta cell, insulin secreting |
| 1428525_at   | 4930488B01Rik | RIKEN cDNA 4930488B01 gene                                        | Cluster0004_High in MIN-6-Pancreatic beta cell, insulin secreting |
| 1432950_at   | 5330421F21Rik | RIKEN cDNA 5330421F21 gene                                        | Cluster0004_High in MIN-6-Pancreatic beta cell, insulin secreting |
| 1433047_at   | 5330430B06Rik | RIKEN cDNA 5330430B06 gene                                        | Cluster0004_High in MIN-6-Pancreatic beta cell, insulin secreting |
| 1458949_at   | 5330434G04Rik | RIKEN cDNA 5330434G04 gene                                        | Cluster0004_High in MIN-6-Pancreatic beta cell, insulin secreting |
| 1454501_at   | 6330419E04Rik | RIKEN cDNA 6330419E04 gene                                        | Cluster0004_High in MIN-6-Pancreatic beta cell, insulin secreting |
| 1433184_at   | 6720477C19Rik | RIKEN cDNA 6720477C19 gene                                        | Cluster0004_High in MIN-6-Pancreatic beta cell, insulin secreting |
| 1441092_at   | 9330159M07Rik | RIKEN cDNA 9330159M07 gene                                        | Cluster0004_High in MIN-6-Pancreatic beta cell, insulin secreting |
| 1441550_at   | 9330184L24Rik | RIKEN cDNA 9330184L24 gene                                        | Cluster0004_High in MIN-6-Pancreatic beta cell, insulin secreting |
| 1458123_at   | 9630002A11Rik | RIKEN cDNA 9630002A11 gene                                        | Cluster0004_High in MIN-6-Pancreatic beta cell, insulin secreting |
| 1418100_at   | A030009H04Rik | RIKEN cDNA A030009H04 gene                                        | Cluster0004_High in MIN-6-Pancreatic beta cell, insulin secreting |
| 1448952_at   | A030009H04Rik | RIKEN cDNA A030009H04 gene                                        | Cluster0004_High in MIN-6-Pancreatic beta cell, insulin secreting |

|              |                        |                                                                                  |                                                                   |
|--------------|------------------------|----------------------------------------------------------------------------------|-------------------------------------------------------------------|
| 1456402_at   | A330076H08Rik          | RIKEN cDNA A330076H08 gene                                                       | Cluster0004_High in MIN-6-Pancreatic beta cell, insulin secreting |
| 1457557_at   | A330076H08Rik          | RIKEN cDNA A330076H08 gene                                                       | Cluster0004_High in MIN-6-Pancreatic beta cell, insulin secreting |
| 1438746_at   | A530058N18Rik          | RIKEN cDNA A530058N18 gene                                                       | Cluster0004_High in MIN-6-Pancreatic beta cell, insulin secreting |
| 1443313_at   | A530058N18Rik          | RIKEN cDNA A530058N18 gene                                                       | Cluster0004_High in MIN-6-Pancreatic beta cell, insulin secreting |
| 1447058_at   | A530058N18Rik          | RIKEN cDNA A530058N18 gene                                                       | Cluster0004_High in MIN-6-Pancreatic beta cell, insulin secreting |
| 1436825_a_at | A630095E13Rik          | RIKEN cDNA A630095E13 gene                                                       | Cluster0004_High in MIN-6-Pancreatic beta cell, insulin secreting |
| 1436117_at   | A830010M20Rik          | RIKEN cDNA A830010M20 gene                                                       | Cluster0004_High in MIN-6-Pancreatic beta cell, insulin secreting |
| 1438565_at   | A830010M20Rik          | RIKEN cDNA A830010M20 gene                                                       | Cluster0004_High in MIN-6-Pancreatic beta cell, insulin secreting |
| 1439086_at   | A930009L07Rik          | RIKEN cDNA A930009L07 gene                                                       | Cluster0004_High in MIN-6-Pancreatic beta cell, insulin secreting |
| 1445124_at   | A930009L07Rik          | RIKEN cDNA A930009L07 gene                                                       | Cluster0004_High in MIN-6-Pancreatic beta cell, insulin secreting |
| 1434474_at   | Abca5                  | ATP-binding cassette, sub-family A (ABC1), member 5                              | Cluster0004_High in MIN-6-Pancreatic beta cell, insulin secreting |
| 1455765_a_at | Abcc8                  | ATP-binding cassette, sub-family C (CFTR/MRP), member 8                          | Cluster0004_High in MIN-6-Pancreatic beta cell, insulin secreting |
| 1457066_at   | Abcc8                  | ATP-binding cassette, sub-family C (CFTR/MRP), member 8                          | Cluster0004_High in MIN-6-Pancreatic beta cell, insulin secreting |
| 1425326_at   | Acly                   | ATP citrate lyase                                                                | Cluster0004_High in MIN-6-Pancreatic beta cell, insulin secreting |
| 1451666_at   | Acly                   | ATP citrate lyase                                                                | Cluster0004_High in MIN-6-Pancreatic beta cell, insulin secreting |
| 1423022_at   | Adra2a                 | adrenergic receptor, alpha 2a                                                    | Cluster0004_High in MIN-6-Pancreatic beta cell, insulin secreting |
| 1443847_x_at | Aff2                   | AF4/FMR2 family, member 2                                                        | Cluster0004_High in MIN-6-Pancreatic beta cell, insulin secreting |
| 1443963_at   | Aff2                   | AF4/FMR2 family, member 2                                                        | Cluster0004_High in MIN-6-Pancreatic beta cell, insulin secreting |
| 1456591_x_at | Akap3                  | A kinase (PRKA) anchor protein 3                                                 | Cluster0004_High in MIN-6-Pancreatic beta cell, insulin secreting |
| 1427373_at   | Amigo1                 | adhesion molecule with Ig like domain 1                                          | Cluster0004_High in MIN-6-Pancreatic beta cell, insulin secreting |
| 1426927_at   | Ap3b2                  | adaptor-related protein complex 3, beta 2 subunit                                | Cluster0004_High in MIN-6-Pancreatic beta cell, insulin secreting |
| 1416551_at   | Atp2a2                 | ATPase, Ca++ transporting, cardiac muscle, slow twitch 2                         | Cluster0004_High in MIN-6-Pancreatic beta cell, insulin secreting |
| 1443551_at   | Atp2a2                 | ATPase, Ca++ transporting, cardiac muscle, slow twitch 2                         | Cluster0004_High in MIN-6-Pancreatic beta cell, insulin secreting |
| 1452363_a_at | Atp2a2                 | ATPase, Ca++ transporting, cardiac muscle, slow twitch 2                         | Cluster0004_High in MIN-6-Pancreatic beta cell, insulin secreting |
| 1421286_a_at | Atp4a                  | ATPase, H+/K+ exchanging, gastric, alpha polypeptide                             | Cluster0004_High in MIN-6-Pancreatic beta cell, insulin secreting |
| 1433188_at   | B230112I24Rik          | RIKEN cDNA B230112I24 gene                                                       | Cluster0004_High in MIN-6-Pancreatic beta cell, insulin secreting |
| 1428568_at   | B230217C12Rik          | RIKEN cDNA B230217C12 gene                                                       | Cluster0004_High in MIN-6-Pancreatic beta cell, insulin secreting |
| 1436286_at   | B830017H08Rik          | RIKEN cDNA B830017H08 gene                                                       | Cluster0004_High in MIN-6-Pancreatic beta cell, insulin secreting |
| 1416673_at   | Bace2                  | beta-site APP-cleaving enzyme 2                                                  | Cluster0004_High in MIN-6-Pancreatic beta cell, insulin secreting |
| 1435581_at   | Bace2                  | beta-site APP-cleaving enzyme 2                                                  | Cluster0004_High in MIN-6-Pancreatic beta cell, insulin secreting |
| 1443368_at   | BB557941               | expressed sequence BB557941                                                      | Cluster0004_High in MIN-6-Pancreatic beta cell, insulin secreting |
| 1447725_at   | C030034E14Rik          | RIKEN cDNA C030034E14 gene                                                       | Cluster0004_High in MIN-6-Pancreatic beta cell, insulin secreting |
| 1453326_at   | C2cd4b                 | C2 calcium-dependent domain containing 4B                                        | Cluster0004_High in MIN-6-Pancreatic beta cell, insulin secreting |
| 1421255_a_at | Cabp1                  | calcium binding protein 1                                                        | Cluster0004_High in MIN-6-Pancreatic beta cell, insulin secreting |
| 1441608_at   | Cacna2d1               | calcium channel, voltage-dependent, alpha2/delta subunit 1                       | Cluster0004_High in MIN-6-Pancreatic beta cell, insulin secreting |
| 1448955_s_at | Cadps                  | Ca2+-dependent secretion activator                                               | Cluster0004_High in MIN-6-Pancreatic beta cell, insulin secreting |
| 1429204_at   | Camk2n2                | calcium/calmodulin-dependent protein kinase II inhibitor 2                       | Cluster0004_High in MIN-6-Pancreatic beta cell, insulin secreting |
| 1433972_at   | Camta1                 | calmodulin binding transcription activator 1                                     | Cluster0004_High in MIN-6-Pancreatic beta cell, insulin secreting |
| 1424547_at   | Car10                  | carbonic anhydrase 10                                                            | Cluster0004_High in MIN-6-Pancreatic beta cell, insulin secreting |
| 1422825_at   | Cartpt                 | CART prepropeptide                                                               | Cluster0004_High in MIN-6-Pancreatic beta cell, insulin secreting |
| 1434779_at   | Cbln2                  | cerebellin 2 precursor protein                                                   | Cluster0004_High in MIN-6-Pancreatic beta cell, insulin secreting |
| 1456557_at   | Ccdc30                 | coiled-coil domain containing 30                                                 | Cluster0004_High in MIN-6-Pancreatic beta cell, insulin secreting |
| 1424767_at   | Cdh22 /// LOC100046008 | cadherin 22 /// similar to cadherin 22                                           | Cluster0004_High in MIN-6-Pancreatic beta cell, insulin secreting |
| 1460045_at   | Cdh7                   | cadherin 7, type 2                                                               | Cluster0004_High in MIN-6-Pancreatic beta cell, insulin secreting |
| 1422052_at   | Cdh8                   | cadherin 8                                                                       | Cluster0004_High in MIN-6-Pancreatic beta cell, insulin secreting |
| 1418304_at   | Cdhr1                  | cadherin-related family member 1                                                 | Cluster0004_High in MIN-6-Pancreatic beta cell, insulin secreting |
| 1416868_at   | Cdkn2c                 | cyclin-dependent kinase inhibitor 2C (p18, inhibits CDK4)                        | Cluster0004_High in MIN-6-Pancreatic beta cell, insulin secreting |
| 1452240_at   | Celf4                  | CUGBP, Elav-like family member 4                                                 | Cluster0004_High in MIN-6-Pancreatic beta cell, insulin secreting |
| 1418149_at   | Chga                   | chromogranin A                                                                   | Cluster0004_High in MIN-6-Pancreatic beta cell, insulin secreting |
| 1427573_at   | Chic1                  | cysteine-rich hydrophobic domain 1                                               | Cluster0004_High in MIN-6-Pancreatic beta cell, insulin secreting |
| 1439300_at   | Chic1                  | cysteine-rich hydrophobic domain 1                                               | Cluster0004_High in MIN-6-Pancreatic beta cell, insulin secreting |
| 1440522_at   | Chic1                  | cysteine-rich hydrophobic domain 1                                               | Cluster0004_High in MIN-6-Pancreatic beta cell, insulin secreting |
| 1436428_at   | Chrn2                  | cholinergic receptor, nicotinic, beta polypeptide 2 (neuronal)                   | Cluster0004_High in MIN-6-Pancreatic beta cell, insulin secreting |
| 1456606_a_at | Chst11 /// Phactr1     | carbohydrate sulfotransferase 11 /// phosphatase and actin regulator 1           | Cluster0004_High in MIN-6-Pancreatic beta cell, insulin secreting |
| 1454837_at   | Cln6                   | ceroid-lipofuscinosis, neuronal 6                                                | Cluster0004_High in MIN-6-Pancreatic beta cell, insulin secreting |
| 1417524_at   | Cnih2 /// LOC100044812 | cornichon homolog 2 (Drosophila) /// similar to cornichon homolog 2 (Drosophila) | Cluster0004_High in MIN-6-Pancreatic beta cell, insulin secreting |
| 1419429_at   | Cntfr                  | ciliary neurotrophic factor receptor                                             | Cluster0004_High in MIN-6-Pancreatic beta cell, insulin secreting |

|              |                        |                                                                                               |                                                                   |
|--------------|------------------------|-----------------------------------------------------------------------------------------------|-------------------------------------------------------------------|
| 1437782_at   | Cntnap2                | contactin associated protein-like 2                                                           | Cluster0004_High in MIN-6-Pancreatic beta cell, insulin secreting |
| 1434326_x_at | Coro2b                 | coronin, actin binding protein, 2B                                                            | Cluster0004_High in MIN-6-Pancreatic beta cell, insulin secreting |
| 1434755_at   | Coro2b                 | coronin, actin binding protein, 2B                                                            | Cluster0004_High in MIN-6-Pancreatic beta cell, insulin secreting |
| 1417960_at   | Cpeb1                  | cytoplasmic polyadenylation element binding protein 1                                         | Cluster0004_High in MIN-6-Pancreatic beta cell, insulin secreting |
| 1421477_at   | Cplx2                  | complexin 2                                                                                   | Cluster0004_High in MIN-6-Pancreatic beta cell, insulin secreting |
| 1436383_at   | Cplx2                  | complexin 2                                                                                   | Cluster0004_High in MIN-6-Pancreatic beta cell, insulin secreting |
| 1455672_s_at | Cplx2                  | complexin 2                                                                                   | Cluster0004_High in MIN-6-Pancreatic beta cell, insulin secreting |
| 1417745_at   | Cpn1                   | carboxypeptidase N, polypeptide 1                                                             | Cluster0004_High in MIN-6-Pancreatic beta cell, insulin secreting |
| 1429443_at   | Cpne4                  | copine IV                                                                                     | Cluster0004_High in MIN-6-Pancreatic beta cell, insulin secreting |
| 1427338_at   | Crocc                  | ciliary rootlet coiled-coil, rootletin                                                        | Cluster0004_High in MIN-6-Pancreatic beta cell, insulin secreting |
| 1419011_at   | Cryba2                 | crystallin, beta A2                                                                           | Cluster0004_High in MIN-6-Pancreatic beta cell, insulin secreting |
| 1447500_at   | Cux2                   | cut-like homeobox 2                                                                           | Cluster0004_High in MIN-6-Pancreatic beta cell, insulin secreting |
| 1456811_at   | Cxxc4                  | CXXC finger 4                                                                                 | Cluster0004_High in MIN-6-Pancreatic beta cell, insulin secreting |
| 1441662_at   | Cyp4x1                 | cytochrome P450, family 4, subfamily x, polypeptide 1                                         | Cluster0004_High in MIN-6-Pancreatic beta cell, insulin secreting |
| 1435730_at   | D930026N18Rik          | RIKEN cDNA D930026N18 gene                                                                    | Cluster0004_High in MIN-6-Pancreatic beta cell, insulin secreting |
| 1420695_at   | Dach1                  | dachshund 1 (Drosophila)                                                                      | Cluster0004_High in MIN-6-Pancreatic beta cell, insulin secreting |
| 1418139_at   | Dcx                    | doublecortin                                                                                  | Cluster0004_High in MIN-6-Pancreatic beta cell, insulin secreting |
| 1418141_at   | Dcx                    | doublecortin                                                                                  | Cluster0004_High in MIN-6-Pancreatic beta cell, insulin secreting |
| 1435404_at   | Disp2                  | dispatched homolog 2 (Drosophila)                                                             | Cluster0004_High in MIN-6-Pancreatic beta cell, insulin secreting |
| 1439767_at   | Dlgap2                 | discs, large (Drosophila) homolog-associated protein 2                                        | Cluster0004_High in MIN-6-Pancreatic beta cell, insulin secreting |
| 1417441_at   | Dnajc12                | DnaJ (Hsp40) homolog, subfamily C, member 12                                                  | Cluster0004_High in MIN-6-Pancreatic beta cell, insulin secreting |
| 1420667_at   | Doc2b                  | double C2, beta                                                                               | Cluster0004_High in MIN-6-Pancreatic beta cell, insulin secreting |
| 1451394_at   | Dpp6                   | dipeptidylpeptidase 6                                                                         | Cluster0004_High in MIN-6-Pancreatic beta cell, insulin secreting |
| 1426189_at   | Dusp15                 | dual specificity phosphatase-like 15                                                          | Cluster0004_High in MIN-6-Pancreatic beta cell, insulin secreting |
| 1424561_at   | Ece2                   | endothelin converting enzyme 2                                                                | Cluster0004_High in MIN-6-Pancreatic beta cell, insulin secreting |
| 1454198_a_at | Efcab1                 | EF hand calcium binding domain 1                                                              | Cluster0004_High in MIN-6-Pancreatic beta cell, insulin secreting |
| 1455074_at   | Efcab1                 | EF hand calcium binding domain 1                                                              | Cluster0004_High in MIN-6-Pancreatic beta cell, insulin secreting |
| 1427484_at   | Eml5                   | echinoderm microtubule associated protein like 5                                              | Cluster0004_High in MIN-6-Pancreatic beta cell, insulin secreting |
| 1437790_at   | Eml5                   | echinoderm microtubule associated protein like 5                                              | Cluster0004_High in MIN-6-Pancreatic beta cell, insulin secreting |
| 1437791_s_at | Eml5                   | echinoderm microtubule associated protein like 5                                              | Cluster0004_High in MIN-6-Pancreatic beta cell, insulin secreting |
| 1445181_at   | Eml5                   | echinoderm microtubule associated protein like 5                                              | Cluster0004_High in MIN-6-Pancreatic beta cell, insulin secreting |
| 1434049_at   | Entpd3                 | ectonucleoside triphosphate diphosphohydrolase 3                                              | Cluster0004_High in MIN-6-Pancreatic beta cell, insulin secreting |
| 1425705_a_at | Ero1b                  | ERO1-like beta (S. cerevisiae)                                                                | Cluster0004_High in MIN-6-Pancreatic beta cell, insulin secreting |
| 1434714_at   | Ero1b                  | ERO1-like beta (S. cerevisiae)                                                                | Cluster0004_High in MIN-6-Pancreatic beta cell, insulin secreting |
| 1449948_at   | Ero1b                  | ERO1-like beta (S. cerevisiae)                                                                | Cluster0004_High in MIN-6-Pancreatic beta cell, insulin secreting |
| 1422607_at   | Etv1                   | ets variant gene 1                                                                            | Cluster0004_High in MIN-6-Pancreatic beta cell, insulin secreting |
| 1450684_at   | Etv1                   | ets variant gene 1                                                                            | Cluster0004_High in MIN-6-Pancreatic beta cell, insulin secreting |
| 1433945_at   | Fam189a1               | family with sequence similarity 189, member A1                                                | Cluster0004_High in MIN-6-Pancreatic beta cell, insulin secreting |
| 1458320_at   | Fam194a                | family with sequence similarity 194, member A                                                 | Cluster0004_High in MIN-6-Pancreatic beta cell, insulin secreting |
| 1425213_at   | Fam81a                 | family with sequence similarity 81, member A                                                  | Cluster0004_High in MIN-6-Pancreatic beta cell, insulin secreting |
| 1440286_at   | Fbxl16                 | F-box and leucine-rich repeat protein 16                                                      | Cluster0004_High in MIN-6-Pancreatic beta cell, insulin secreting |
| 1451693_a_at | Fgf12                  | fibroblast growth factor 12                                                                   | Cluster0004_High in MIN-6-Pancreatic beta cell, insulin secreting |
| 1435747_at   | Fgf14                  | fibroblast growth factor 14                                                                   | Cluster0004_High in MIN-6-Pancreatic beta cell, insulin secreting |
| 1436800_at   | Fstl5                  | folliculin-like 5                                                                             | Cluster0004_High in MIN-6-Pancreatic beta cell, insulin secreting |
| 1423529_at   | G6pc2                  | glucose-6-phosphatase, catalytic, 2                                                           | Cluster0004_High in MIN-6-Pancreatic beta cell, insulin secreting |
| 1427704_a_at | Galr1                  | galanin receptor 1                                                                            | Cluster0004_High in MIN-6-Pancreatic beta cell, insulin secreting |
| 1441329_at   | Galr1                  | galanin receptor 1                                                                            | Cluster0004_High in MIN-6-Pancreatic beta cell, insulin secreting |
| 1426547_at   | Gc                     | group specific component                                                                      | Cluster0004_High in MIN-6-Pancreatic beta cell, insulin secreting |
| 1425303_at   | Gck                    | glucokinase                                                                                   | Cluster0004_High in MIN-6-Pancreatic beta cell, insulin secreting |
| 1423328_at   | Gdap1                  | ganglioside-induced differentiation-associated-protein 1                                      | Cluster0004_High in MIN-6-Pancreatic beta cell, insulin secreting |
| 1423329_at   | Gdap1                  | ganglioside-induced differentiation-associated-protein 1                                      | Cluster0004_High in MIN-6-Pancreatic beta cell, insulin secreting |
| 1450940_at   | Gdap1                  | ganglioside-induced differentiation-associated-protein 1                                      | Cluster0004_High in MIN-6-Pancreatic beta cell, insulin secreting |
| 1455443_at   | Gdap111                | ganglioside-induced differentiation-associated protein 1-like 1                               | Cluster0004_High in MIN-6-Pancreatic beta cell, insulin secreting |
| 1418880_at   | Gfra3 /// LOC100045484 | glial cell line derived neurotrophic factor family receptor alpha 3 /// similar to GFRalpha-3 | Cluster0004_High in MIN-6-Pancreatic beta cell, insulin secreting |
| 1445790_at   | Gipr                   | gastric inhibitory polypeptide receptor                                                       | Cluster0004_High in MIN-6-Pancreatic beta cell, insulin secreting |
| 1423019_at   | Gjd2                   | gap junction protein, delta 2                                                                 | Cluster0004_High in MIN-6-Pancreatic beta cell, insulin secreting |
| 1435297_at   | Gjd2                   | gap junction protein, delta 2                                                                 | Cluster0004_High in MIN-6-Pancreatic beta cell, insulin secreting |

|              |                      |                                                                                     |                                                                   |
|--------------|----------------------|-------------------------------------------------------------------------------------|-------------------------------------------------------------------|
| 1433728_at   | Glb1l2               | galactosidase, beta 1-like 2                                                        | Cluster0004_High in MIN-6-Pancreatic beta cell, insulin secreting |
| 1422330_at   | Glp1r                | glucagon-like peptide 1 receptor                                                    | Cluster0004_High in MIN-6-Pancreatic beta cell, insulin secreting |
| 1437139_at   | Glr1a                | glycine receptor, alpha 1 subunit                                                   | Cluster0004_High in MIN-6-Pancreatic beta cell, insulin secreting |
| 1456221_at   | Gm10632              | predicted gene 10632                                                                | Cluster0004_High in MIN-6-Pancreatic beta cell, insulin secreting |
| 1423183_at   | Gm3888 /// Lgi1      | predicted gene 3888 /// leucine-rich repeat LGI family, member 1                    | Cluster0004_High in MIN-6-Pancreatic beta cell, insulin secreting |
| 1459561_at   | Gm3924               | predicted gene 3924                                                                 | Cluster0004_High in MIN-6-Pancreatic beta cell, insulin secreting |
| 1443995_at   | Gm9                  | predicted gene 9                                                                    | Cluster0004_High in MIN-6-Pancreatic beta cell, insulin secreting |
| 1417943_at   | Gng4                 | guanine nucleotide binding protein (G protein), gamma 4                             | Cluster0004_High in MIN-6-Pancreatic beta cell, insulin secreting |
| 1447669_s_at | Gng4                 | guanine nucleotide binding protein (G protein), gamma 4                             | Cluster0004_High in MIN-6-Pancreatic beta cell, insulin secreting |
| 1438526_at   | Gpr158               | G protein-coupled receptor 158                                                      | Cluster0004_High in MIN-6-Pancreatic beta cell, insulin secreting |
| 1442138_at   | Gpr62                | G protein-coupled receptor 62                                                       | Cluster0004_High in MIN-6-Pancreatic beta cell, insulin secreting |
| 1435722_at   | Gria4                | glutamate receptor, ionotropic, AMPA4 (alpha 4)                                     | Cluster0004_High in MIN-6-Pancreatic beta cell, insulin secreting |
| 1436772_at   | Gria4                | Glutamate receptor, ionotropic, AMPA4 (alpha 4)                                     | Cluster0004_High in MIN-6-Pancreatic beta cell, insulin secreting |
| 1440891_at   | Gria4                | glutamate receptor, ionotropic, AMPA4 (alpha 4)                                     | Cluster0004_High in MIN-6-Pancreatic beta cell, insulin secreting |
| 1437968_at   | Grin1                | glutamate receptor, ionotropic, NMDA1 (zeta 1)                                      | Cluster0004_High in MIN-6-Pancreatic beta cell, insulin secreting |
| 1450202_at   | Grin1                | glutamate receptor, ionotropic, NMDA1 (zeta 1)                                      | Cluster0004_High in MIN-6-Pancreatic beta cell, insulin secreting |
| 1423634_at   | Gsdma                | gasdermin A                                                                         | Cluster0004_High in MIN-6-Pancreatic beta cell, insulin secreting |
| 1448928_at   | Hdac6                | histone deacetylase 6                                                               | Cluster0004_High in MIN-6-Pancreatic beta cell, insulin secreting |
| 1449482_at   | Hist3h2ba            | histone cluster 3, H2ba                                                             | Cluster0004_High in MIN-6-Pancreatic beta cell, insulin secreting |
| 1459646_at   | Hs3st6               | heparan sulfate (glucosamine) 3-O-sulfotransferase 6                                | Cluster0004_High in MIN-6-Pancreatic beta cell, insulin secreting |
| 1434051_s_at | Hspa12a              | heat shock protein 12A                                                              | Cluster0004_High in MIN-6-Pancreatic beta cell, insulin secreting |
| 1436961_at   | Hspa12a              | heat shock protein 12A                                                              | Cluster0004_High in MIN-6-Pancreatic beta cell, insulin secreting |
| 1423509_a_at | lapp                 | islet amyloid polypeptide                                                           | Cluster0004_High in MIN-6-Pancreatic beta cell, insulin secreting |
| 1423510_at   | lapp                 | islet amyloid polypeptide                                                           | Cluster0004_High in MIN-6-Pancreatic beta cell, insulin secreting |
| 1437323_a_at | lapp                 | islet amyloid polypeptide                                                           | Cluster0004_High in MIN-6-Pancreatic beta cell, insulin secreting |
| 1456004_x_at | lapp                 | islet amyloid polypeptide                                                           | Cluster0004_High in MIN-6-Pancreatic beta cell, insulin secreting |
| 1422826_at   | lgfals               | insulin-like growth factor binding protein, acid labile subunit                     | Cluster0004_High in MIN-6-Pancreatic beta cell, insulin secreting |
| 1438589_at   | Igfs1                | immunoglobulin superfamily, member 1                                                | Cluster0004_High in MIN-6-Pancreatic beta cell, insulin secreting |
| 1448950_at   | Il1r1                | interleukin 1 receptor, type I                                                      | Cluster0004_High in MIN-6-Pancreatic beta cell, insulin secreting |
| 1418178_at   | Ina                  | internexin neuronal intermediate filament protein, alpha                            | Cluster0004_High in MIN-6-Pancreatic beta cell, insulin secreting |
| 1448991_a_at | Ina /// LOC100047943 | internexin neuronal intermediate filament protein, alpha /// similar to Ina protein | Cluster0004_High in MIN-6-Pancreatic beta cell, insulin secreting |
| 1448992_at   | Ina /// LOC100047943 | internexin neuronal intermediate filament protein, alpha /// similar to Ina protein | Cluster0004_High in MIN-6-Pancreatic beta cell, insulin secreting |
| 1422447_at   | Ins1                 | insulin I                                                                           | Cluster0004_High in MIN-6-Pancreatic beta cell, insulin secreting |
| 1422446_x_at | Ins2                 | insulin II                                                                          | Cluster0004_High in MIN-6-Pancreatic beta cell, insulin secreting |
| 1421399_at   | Insm1                | insulinoma-associated 1                                                             | Cluster0004_High in MIN-6-Pancreatic beta cell, insulin secreting |
| 1455865_at   | Insm1                | insulinoma-associated 1                                                             | Cluster0004_High in MIN-6-Pancreatic beta cell, insulin secreting |
| 1422720_at   | Isl1                 | ISL1 transcription factor, LIM/homeodomain                                          | Cluster0004_High in MIN-6-Pancreatic beta cell, insulin secreting |
| 1450723_at   | Isl1                 | ISL1 transcription factor, LIM/homeodomain                                          | Cluster0004_High in MIN-6-Pancreatic beta cell, insulin secreting |
| 1423179_at   | Kcnb1                | potassium voltage gated channel, Shab-related subfamily, member 1                   | Cluster0004_High in MIN-6-Pancreatic beta cell, insulin secreting |
| 1423180_at   | Kcnb1                | potassium voltage gated channel, Shab-related subfamily, member 1                   | Cluster0004_High in MIN-6-Pancreatic beta cell, insulin secreting |
| 1455258_at   | Kcnc2                | potassium voltage gated channel, Shaw-related subfamily, member 2                   | Cluster0004_High in MIN-6-Pancreatic beta cell, insulin secreting |
| 1435994_at   | Kcnc1                | potassium voltage-gated channel, subfamily H (eag-related), member 1                | Cluster0004_High in MIN-6-Pancreatic beta cell, insulin secreting |
| 1416785_at   | Kcnp1                | Kv channel-interacting protein 1                                                    | Cluster0004_High in MIN-6-Pancreatic beta cell, insulin secreting |
| 1433156_at   | Kcnp1                | Kv channel-interacting protein 1                                                    | Cluster0004_High in MIN-6-Pancreatic beta cell, insulin secreting |
| 1448459_at   | Kcnp1                | Kv channel-interacting protein 1                                                    | Cluster0004_High in MIN-6-Pancreatic beta cell, insulin secreting |
| 1450515_at   | Kcnp11               | potassium inwardly rectifying channel, subfamily J, member 11                       | Cluster0004_High in MIN-6-Pancreatic beta cell, insulin secreting |
| 1429913_at   | Kcnk16               | potassium channel, subfamily K, member 16                                           | Cluster0004_High in MIN-6-Pancreatic beta cell, insulin secreting |
| 1424848_at   | Kcnma1               | potassium large conductance calcium-activated channel, subfamily M, alpha member 1  | Cluster0004_High in MIN-6-Pancreatic beta cell, insulin secreting |
| 1426322_a_at | Kcnmb2               | potassium large conductance calcium-activated channel, subfamily M, beta member 2   | Cluster0004_High in MIN-6-Pancreatic beta cell, insulin secreting |
| 1431844_at   | Kcnmb2               | potassium large conductance calcium-activated channel, subfamily M, beta member 2   | Cluster0004_High in MIN-6-Pancreatic beta cell, insulin secreting |
| 1422838_at   | Kcnu1                | potassium channel, subfamily U, member 1                                            | Cluster0004_High in MIN-6-Pancreatic beta cell, insulin secreting |
| 1424910_at   | Kif12                | kinesin family member 12                                                            | Cluster0004_High in MIN-6-Pancreatic beta cell, insulin secreting |
| 1453193_s_at | Kif12                | kinesin family member 12                                                            | Cluster0004_High in MIN-6-Pancreatic beta cell, insulin secreting |
| 1421053_at   | Kif1a                | kinesin family member 1A                                                            | Cluster0004_High in MIN-6-Pancreatic beta cell, insulin secreting |
| 1450108_at   | Kif1a                | kinesin family member 1A                                                            | Cluster0004_High in MIN-6-Pancreatic beta cell, insulin secreting |
| 1436465_at   | Klhl1                | kelch-like 1 (Drosophila)                                                           | Cluster0004_High in MIN-6-Pancreatic beta cell, insulin secreting |
| 1449241_at   | Klhl1                | kelch-like 1 (Drosophila)                                                           | Cluster0004_High in MIN-6-Pancreatic beta cell, insulin secreting |

|              |                          |                                                                                                                                          |                                                                   |
|--------------|--------------------------|------------------------------------------------------------------------------------------------------------------------------------------|-------------------------------------------------------------------|
| 1458375_at   | Klhl32                   | kelch-like 32 (Drosophila)                                                                                                               | Cluster0004_High in MIN-6-Pancreatic beta cell, insulin secreting |
| 1435851_at   | Lgi1                     | leucine-rich repeat LGI family, member 1                                                                                                 | Cluster0004_High in MIN-6-Pancreatic beta cell, insulin secreting |
| 1428118_at   | Lingo1                   | leucine rich repeat and Ig domain containing 1                                                                                           | Cluster0004_High in MIN-6-Pancreatic beta cell, insulin secreting |
| 1425828_at   | LOC100045487 /// Nkx6-1  | similar to homeodomain transcription factor /// NK6 homeobox 1                                                                           | Cluster0004_High in MIN-6-Pancreatic beta cell, insulin secreting |
| 1428077_at   | LOC100047091 /// Tmem163 | hypothetical protein LOC100047091 /// transmembrane protein 163                                                                          | Cluster0004_High in MIN-6-Pancreatic beta cell, insulin secreting |
| 1424900_at   | LOC100048058 /// Slc29a4 | similar to Solute carrier family 29 (nucleoside transporters), member 4 /// solute carrier family 29 (nucleoside transporters), member 4 | Cluster0004_High in MIN-6-Pancreatic beta cell, insulin secreting |
| 1448083_at   | LOC675405 /// Nalcn      | similar to voltage gated channel like 1 /// sodium leak channel, non-selective                                                           | Cluster0004_High in MIN-6-Pancreatic beta cell, insulin secreting |
| 1457423_at   | LOC675405 /// Nalcn      | similar to voltage gated channel like 1 /// sodium leak channel, non-selective                                                           | Cluster0004_High in MIN-6-Pancreatic beta cell, insulin secreting |
| 1436010_at   | Lrrc16b                  | leucine rich repeat containing 16B                                                                                                       | Cluster0004_High in MIN-6-Pancreatic beta cell, insulin secreting |
| 1433876_at   | Lrrc24                   | leucine rich repeat containing 24                                                                                                        | Cluster0004_High in MIN-6-Pancreatic beta cell, insulin secreting |
| 1451490_at   | Lyplal1                  | lysophospholipase-like 1                                                                                                                 | Cluster0004_High in MIN-6-Pancreatic beta cell, insulin secreting |
| 1418785_at   | Mapk8ip2                 | mitogen-activated protein kinase 8 interacting protein 2                                                                                 | Cluster0004_High in MIN-6-Pancreatic beta cell, insulin secreting |
| 1435045_s_at | Mapk8ip2                 | mitogen-activated protein kinase 8 interacting protein 2                                                                                 | Cluster0004_High in MIN-6-Pancreatic beta cell, insulin secreting |
| 1449225_a_at | Mapk8ip2                 | mitogen-activated protein kinase 8 interacting protein 2                                                                                 | Cluster0004_High in MIN-6-Pancreatic beta cell, insulin secreting |
| 1455194_at   | Mapk8ip2                 | mitogen-activated protein kinase 8 interacting protein 2                                                                                 | Cluster0004_High in MIN-6-Pancreatic beta cell, insulin secreting |
| 1449423_at   | Mast1                    | microtubule associated serine/threonine kinase 1                                                                                         | Cluster0004_High in MIN-6-Pancreatic beta cell, insulin secreting |
| 1423147_at   | Mat1a                    | methionine adenosyltransferase 1, alpha                                                                                                  | Cluster0004_High in MIN-6-Pancreatic beta cell, insulin secreting |
| 1428764_at   | Meg3                     | maternally expressed 3                                                                                                                   | Cluster0004_High in MIN-6-Pancreatic beta cell, insulin secreting |
| 1428765_at   | Meg3                     | maternally expressed 3                                                                                                                   | Cluster0004_High in MIN-6-Pancreatic beta cell, insulin secreting |
| 1429256_at   | Meg3                     | maternally expressed 3                                                                                                                   | Cluster0004_High in MIN-6-Pancreatic beta cell, insulin secreting |
| 1429257_at   | Meg3                     | maternally expressed 3                                                                                                                   | Cluster0004_High in MIN-6-Pancreatic beta cell, insulin secreting |
| 1436057_at   | Meg3                     | maternally expressed 3                                                                                                                   | Cluster0004_High in MIN-6-Pancreatic beta cell, insulin secreting |
| 1452906_at   | Meg3                     | maternally expressed 3                                                                                                                   | Cluster0004_High in MIN-6-Pancreatic beta cell, insulin secreting |
| 1460299_at   | Mnx1                     | motor neuron and pancreas homeobox 1                                                                                                     | Cluster0004_High in MIN-6-Pancreatic beta cell, insulin secreting |
| 1419077_at   | Mpp3                     | membrane protein, palmitoylated 3 (MAGUK p55 subfamily member 3)                                                                         | Cluster0004_High in MIN-6-Pancreatic beta cell, insulin secreting |
| 1440699_at   | Mtap2                    | microtubule-associated protein 2                                                                                                         | Cluster0004_High in MIN-6-Pancreatic beta cell, insulin secreting |
| 1427025_at   | Mtmr7                    | myotubularin related protein 7                                                                                                           | Cluster0004_High in MIN-6-Pancreatic beta cell, insulin secreting |
| 1445532_at   | Myo16                    | myosin XVI                                                                                                                               | Cluster0004_High in MIN-6-Pancreatic beta cell, insulin secreting |
| 1422773_at   | Myt1                     | myelin transcription factor 1                                                                                                            | Cluster0004_High in MIN-6-Pancreatic beta cell, insulin secreting |
| 1429738_at   | Myt1l                    | myelin transcription factor 1-like                                                                                                       | Cluster0004_High in MIN-6-Pancreatic beta cell, insulin secreting |
| 1436483_at   | Myt1l                    | myelin transcription factor 1-like                                                                                                       | Cluster0004_High in MIN-6-Pancreatic beta cell, insulin secreting |
| 1429676_at   | NA                       | ---                                                                                                                                      | Cluster0004_High in MIN-6-Pancreatic beta cell, insulin secreting |
| 1435598_at   | NA                       | ---                                                                                                                                      | Cluster0004_High in MIN-6-Pancreatic beta cell, insulin secreting |
| 1436092_at   | NA                       | ---                                                                                                                                      | Cluster0004_High in MIN-6-Pancreatic beta cell, insulin secreting |
| 1436461_at   | NA                       | ---                                                                                                                                      | Cluster0004_High in MIN-6-Pancreatic beta cell, insulin secreting |
| 1439702_at   | NA                       | ---                                                                                                                                      | Cluster0004_High in MIN-6-Pancreatic beta cell, insulin secreting |
| 1440056_at   | NA                       | ---                                                                                                                                      | Cluster0004_High in MIN-6-Pancreatic beta cell, insulin secreting |
| 1440291_at   | NA                       | ---                                                                                                                                      | Cluster0004_High in MIN-6-Pancreatic beta cell, insulin secreting |
| 1441220_at   | NA                       | ---                                                                                                                                      | Cluster0004_High in MIN-6-Pancreatic beta cell, insulin secreting |
| 1441679_at   | NA                       | ---                                                                                                                                      | Cluster0004_High in MIN-6-Pancreatic beta cell, insulin secreting |
| 1441869_x_at | NA                       | ---                                                                                                                                      | Cluster0004_High in MIN-6-Pancreatic beta cell, insulin secreting |
| 1442037_at   | NA                       | ---                                                                                                                                      | Cluster0004_High in MIN-6-Pancreatic beta cell, insulin secreting |
| 1442870_at   | NA                       | ---                                                                                                                                      | Cluster0004_High in MIN-6-Pancreatic beta cell, insulin secreting |
| 1443239_at   | NA                       | ---                                                                                                                                      | Cluster0004_High in MIN-6-Pancreatic beta cell, insulin secreting |
| 1443285_at   | NA                       | ---                                                                                                                                      | Cluster0004_High in MIN-6-Pancreatic beta cell, insulin secreting |
| 1443697_at   | NA                       | ---                                                                                                                                      | Cluster0004_High in MIN-6-Pancreatic beta cell, insulin secreting |
| 1444488_at   | NA                       | ---                                                                                                                                      | Cluster0004_High in MIN-6-Pancreatic beta cell, insulin secreting |
| 1445307_at   | NA                       | ---                                                                                                                                      | Cluster0004_High in MIN-6-Pancreatic beta cell, insulin secreting |
| 1445393_at   | NA                       | ---                                                                                                                                      | Cluster0004_High in MIN-6-Pancreatic beta cell, insulin secreting |
| 1445579_at   | NA                       | ---                                                                                                                                      | Cluster0004_High in MIN-6-Pancreatic beta cell, insulin secreting |
| 1446364_at   | NA                       | ---                                                                                                                                      | Cluster0004_High in MIN-6-Pancreatic beta cell, insulin secreting |
| 1446524_at   | NA                       | ---                                                                                                                                      | Cluster0004_High in MIN-6-Pancreatic beta cell, insulin secreting |
| 1446755_at   | NA                       | ---                                                                                                                                      | Cluster0004_High in MIN-6-Pancreatic beta cell, insulin secreting |
| 1456970_at   | NA                       | ---                                                                                                                                      | Cluster0004_High in MIN-6-Pancreatic beta cell, insulin secreting |
| 1457124_at   | NA                       | ---                                                                                                                                      | Cluster0004_High in MIN-6-Pancreatic beta cell, insulin secreting |
| 1457132_at   | NA                       | ---                                                                                                                                      | Cluster0004_High in MIN-6-Pancreatic beta cell, insulin secreting |
| 1457152_at   | NA                       | ---                                                                                                                                      | Cluster0004_High in MIN-6-Pancreatic beta cell, insulin secreting |



|              |                                          |                                                                                                           |                                                                   |
|--------------|------------------------------------------|-----------------------------------------------------------------------------------------------------------|-------------------------------------------------------------------|
| 1457177_at   | NA                                       | ---                                                                                                       | Cluster0004_High in MIN-6-Pancreatic beta cell, insulin secreting |
| 1457444_at   | NA                                       | ---                                                                                                       | Cluster0004_High in MIN-6-Pancreatic beta cell, insulin secreting |
| 1457490_at   | NA                                       | ---                                                                                                       | Cluster0004_High in MIN-6-Pancreatic beta cell, insulin secreting |
| 1457613_at   | NA                                       | ---                                                                                                       | Cluster0004_High in MIN-6-Pancreatic beta cell, insulin secreting |
| 1458134_at   | NA                                       | ---                                                                                                       | Cluster0004_High in MIN-6-Pancreatic beta cell, insulin secreting |
| 1458298_at   | NA                                       | ---                                                                                                       | Cluster0004_High in MIN-6-Pancreatic beta cell, insulin secreting |
| 1458697_at   | NA                                       | ---                                                                                                       | Cluster0004_High in MIN-6-Pancreatic beta cell, insulin secreting |
| 1459049_at   | NA                                       | ---                                                                                                       | Cluster0004_High in MIN-6-Pancreatic beta cell, insulin secreting |
| 1459310_at   | NA                                       | ---                                                                                                       | Cluster0004_High in MIN-6-Pancreatic beta cell, insulin secreting |
| 1460595_at   | NA                                       | ---                                                                                                       | Cluster0004_High in MIN-6-Pancreatic beta cell, insulin secreting |
| 1418046_at   | Nap12                                    | nucleosome assembly protein 1-like 2                                                                      | Cluster0004_High in MIN-6-Pancreatic beta cell, insulin secreting |
| 1417411_at   | Nap15                                    | nucleosome assembly protein 1-like 5                                                                      | Cluster0004_High in MIN-6-Pancreatic beta cell, insulin secreting |
| 1441353_at   | Nav2                                     | neuron navigator 2                                                                                        | Cluster0004_High in MIN-6-Pancreatic beta cell, insulin secreting |
| 1418881_at   | Necab2                                   | N-terminal EF-hand calcium binding protein 2                                                              | Cluster0004_High in MIN-6-Pancreatic beta cell, insulin secreting |
| 1433787_at   | Nell1                                    | NEL-like 1 (chicken)                                                                                      | Cluster0004_High in MIN-6-Pancreatic beta cell, insulin secreting |
| 1426412_at   | Neurod1                                  | neurogenic differentiation 1                                                                              | Cluster0004_High in MIN-6-Pancreatic beta cell, insulin secreting |
| 1426413_at   | Neurod1                                  | neurogenic differentiation 1                                                                              | Cluster0004_High in MIN-6-Pancreatic beta cell, insulin secreting |
| 1436205_at   | Nfasc                                    | neurofascin                                                                                               | Cluster0004_High in MIN-6-Pancreatic beta cell, insulin secreting |
| 1421112_at   | Nkx2-2                                   | NK2 transcription factor related, locus 2 (Drosophila)                                                    | Cluster0004_High in MIN-6-Pancreatic beta cell, insulin secreting |
| 1423506_a_at | Nnat                                     | neuronatin                                                                                                | Cluster0004_High in MIN-6-Pancreatic beta cell, insulin secreting |
| 1441447_at   | Nol4                                     | nucleolar protein 4                                                                                       | Cluster0004_High in MIN-6-Pancreatic beta cell, insulin secreting |
| 1456387_at   | Nol4                                     | nucleolar protein 4                                                                                       | Cluster0004_High in MIN-6-Pancreatic beta cell, insulin secreting |
| 1419127_at   | Npy                                      | neuropeptide Y                                                                                            | Cluster0004_High in MIN-6-Pancreatic beta cell, insulin secreting |
| 1435061_at   | Nudt10                                   | nudix (nucleoside diphosphate linked moiety X)-type motif 1C                                              | Cluster0004_High in MIN-6-Pancreatic beta cell, insulin secreting |
| 1454424_at   | Odz2                                     | odd Oz/ten-m homolog 2 (Drosophila)                                                                       | Cluster0004_High in MIN-6-Pancreatic beta cell, insulin secreting |
| 1457273_at   | Odz2                                     | odd Oz/ten-m homolog 2 (Drosophila)                                                                       | Cluster0004_High in MIN-6-Pancreatic beta cell, insulin secreting |
| 1440888_at   | Oxtr                                     | oxytocin receptor                                                                                         | Cluster0004_High in MIN-6-Pancreatic beta cell, insulin secreting |
| 1444451_at   | Pappa2                                   | pappalysin 2                                                                                              | Cluster0004_High in MIN-6-Pancreatic beta cell, insulin secreting |
| 1428931_a_at | Parp6                                    | poly (ADP-ribose) polymerase family, member 6                                                             | Cluster0004_High in MIN-6-Pancreatic beta cell, insulin secreting |
| 1419271_at   | Pax6                                     | paired box gene 6                                                                                         | Cluster0004_High in MIN-6-Pancreatic beta cell, insulin secreting |
| 1425960_s_at | Pax6                                     | paired box gene 6                                                                                         | Cluster0004_High in MIN-6-Pancreatic beta cell, insulin secreting |
| 1452526_a_at | Pax6                                     | paired box gene 6                                                                                         | Cluster0004_High in MIN-6-Pancreatic beta cell, insulin secreting |
| 1440445_at   | Pax6os1                                  | Pax6 opposite strand transcript 1                                                                         | Cluster0004_High in MIN-6-Pancreatic beta cell, insulin secreting |
| 1420798_s_at | Pcdha1 /// Pcdha10 /// Pcdha11 /// Pcdh: | protocadherin alpha 1 /// protocadherin alpha 10 /// protocadherin alpha 11 /// protocadherin alpha 12 // | Cluster0004_High in MIN-6-Pancreatic beta cell, insulin secreting |
| 1424341_s_at | Pcdha1 /// Pcdha10 /// Pcdha11 /// Pcdh: | protocadherin alpha 1 /// protocadherin alpha 10 /// protocadherin alpha 11 /// protocadherin alpha 12 // | Cluster0004_High in MIN-6-Pancreatic beta cell, insulin secreting |
| 1451769_s_at | Pcdha1 /// Pcdha10 /// Pcdha11 /// Pcdh: | protocadherin alpha 1 /// protocadherin alpha 10 /// protocadherin alpha 11 /// protocadherin alpha 12 // | Cluster0004_High in MIN-6-Pancreatic beta cell, insulin secreting |
| 1422729_at   | Pcdhb10                                  | protocadherin beta 10                                                                                     | Cluster0004_High in MIN-6-Pancreatic beta cell, insulin secreting |
| 1419392_at   | Pclo                                     | piccolo (presynaptic cytomatrix protein)                                                                  | Cluster0004_High in MIN-6-Pancreatic beta cell, insulin secreting |
| 1452423_at   | Pclo                                     | piccolo (presynaptic cytomatrix protein)                                                                  | Cluster0004_High in MIN-6-Pancreatic beta cell, insulin secreting |
| 1455373_at   | Pclo                                     | piccolo (presynaptic cytomatrix protein)                                                                  | Cluster0004_High in MIN-6-Pancreatic beta cell, insulin secreting |
| 1421396_at   | Pcsk1                                    | proprotein convertase subtilisin/kexin type 1                                                             | Cluster0004_High in MIN-6-Pancreatic beta cell, insulin secreting |
| 1416965_at   | Pcsk1n                                   | proprotein convertase subtilisin/kexin type 1 inhibitor                                                   | Cluster0004_High in MIN-6-Pancreatic beta cell, insulin secreting |
| 1428305_at   | Pcsk2                                    | proprotein convertase subtilisin/kexin type 2                                                             | Cluster0004_High in MIN-6-Pancreatic beta cell, insulin secreting |
| 1444147_at   | Pcsk2                                    | proprotein convertase subtilisin/kexin type 2                                                             | Cluster0004_High in MIN-6-Pancreatic beta cell, insulin secreting |
| 1447991_at   | Pcsk2                                    | proprotein convertase subtilisin/kexin type 2                                                             | Cluster0004_High in MIN-6-Pancreatic beta cell, insulin secreting |
| 1447992_s_at | Pcsk2                                    | proprotein convertase subtilisin/kexin type 2                                                             | Cluster0004_High in MIN-6-Pancreatic beta cell, insulin secreting |
| 1448312_at   | Pcsk2                                    | proprotein convertase subtilisin/kexin type 2                                                             | Cluster0004_High in MIN-6-Pancreatic beta cell, insulin secreting |
| 1422173_at   | Pdx1                                     | pancreatic and duodenal homeobox 1                                                                        | Cluster0004_High in MIN-6-Pancreatic beta cell, insulin secreting |
| 1422174_at   | Pdx1                                     | pancreatic and duodenal homeobox 1                                                                        | Cluster0004_High in MIN-6-Pancreatic beta cell, insulin secreting |
| 1416266_at   | Pdyn                                     | prodynorphin                                                                                              | Cluster0004_High in MIN-6-Pancreatic beta cell, insulin secreting |
| 1438399_at   | Pex5l                                    | peroxisomal biogenesis factor 5-like                                                                      | Cluster0004_High in MIN-6-Pancreatic beta cell, insulin secreting |
| 1446144_at   | Pex5l                                    | peroxisomal biogenesis factor 5-like                                                                      | Cluster0004_High in MIN-6-Pancreatic beta cell, insulin secreting |
| 1451062_a_at | Pex5l                                    | peroxisomal biogenesis factor 5-like                                                                      | Cluster0004_High in MIN-6-Pancreatic beta cell, insulin secreting |
| 1460570_at   | Pgbd5                                    | piggyBac transposable element derived 5                                                                   | Cluster0004_High in MIN-6-Pancreatic beta cell, insulin secreting |
| 1439022_at   | Phactr1                                  | phosphatase and actin regulator 1                                                                         | Cluster0004_High in MIN-6-Pancreatic beta cell, insulin secreting |
| 1454832_at   | Phactr1                                  | phosphatase and actin regulator 1                                                                         | Cluster0004_High in MIN-6-Pancreatic beta cell, insulin secreting |
| 1435618_at   | Pnma2                                    | paraneoplastic antigen MA2                                                                                | Cluster0004_High in MIN-6-Pancreatic beta cell, insulin secreting |

|              |          |                                                                                  |                                                                   |
|--------------|----------|----------------------------------------------------------------------------------|-------------------------------------------------------------------|
| 1435960_at   | Pnmal2   | PNMA-like 2                                                                      | Cluster0004_High in MIN-6-Pancreatic beta cell, insulin secreting |
| 1438363_at   | Pnmal2   | PNMA-like 2                                                                      | Cluster0004_High in MIN-6-Pancreatic beta cell, insulin secreting |
| 1422605_at   | Ppp1r1a  | protein phosphatase 1, regulatory (inhibitor) subunit 1A                         | Cluster0004_High in MIN-6-Pancreatic beta cell, insulin secreting |
| 1438671_at   | Ppp2r2c  | protein phosphatase 2 (formerly 2A), regulatory subunit B (PR 52), gamma isoform | Cluster0004_High in MIN-6-Pancreatic beta cell, insulin secreting |
| 1435204_at   | Prmt8    | protein arginine N-methyltransferase 8                                           | Cluster0004_High in MIN-6-Pancreatic beta cell, insulin secreting |
| 1437966_at   | Prrt3    | proline-rich transmembrane protein 3                                             | Cluster0004_High in MIN-6-Pancreatic beta cell, insulin secreting |
| 1441991_at   | Prss53   | protease, serine, 53                                                             | Cluster0004_High in MIN-6-Pancreatic beta cell, insulin secreting |
| 1416588_at   | Ptpn     | protein tyrosine phosphatase, receptor type, N                                   | Cluster0004_High in MIN-6-Pancreatic beta cell, insulin secreting |
| 1435968_at   | Ptpn2    | protein tyrosine phosphatase, receptor type, N polypeptide 2                     | Cluster0004_High in MIN-6-Pancreatic beta cell, insulin secreting |
| 1422589_at   | Rab3a    | RAB3A, member RAS oncogene family                                                | Cluster0004_High in MIN-6-Pancreatic beta cell, insulin secreting |
| 1433791_at   | Rab9b    | RAB9B, member RAS oncogene family                                                | Cluster0004_High in MIN-6-Pancreatic beta cell, insulin secreting |
| 1421622_a_at | Rapgef4  | Rap guanine nucleotide exchange factor (GEF) 4                                   | Cluster0004_High in MIN-6-Pancreatic beta cell, insulin secreting |
| 1422600_at   | Rasgrf1  | RAS protein-specific guanine nucleotide-releasing factor 1                       | Cluster0004_High in MIN-6-Pancreatic beta cell, insulin secreting |
| 1424734_at   | Rasgrf1  | RAS protein-specific guanine nucleotide-releasing factor 1                       | Cluster0004_High in MIN-6-Pancreatic beta cell, insulin secreting |
| 1459056_at   | Rasgrf1  | RAS protein-specific guanine nucleotide-releasing factor 1                       | Cluster0004_High in MIN-6-Pancreatic beta cell, insulin secreting |
| 1434027_at   | Rcan3    | regulator of calcineurin 3                                                       | Cluster0004_High in MIN-6-Pancreatic beta cell, insulin secreting |
| 1450450_at   | Rcan3    | regulator of calcineurin 3                                                       | Cluster0004_High in MIN-6-Pancreatic beta cell, insulin secreting |
| 1417988_at   | Resp18   | regulated endocrine-specific protein 18                                          | Cluster0004_High in MIN-6-Pancreatic beta cell, insulin secreting |
| 1435419_at   | Rgag4    | retrotransposon gag domain containing 4                                          | Cluster0004_High in MIN-6-Pancreatic beta cell, insulin secreting |
| 1418691_at   | Rgs9     | regulator of G-protein signaling 9                                               | Cluster0004_High in MIN-6-Pancreatic beta cell, insulin secreting |
| 1439635_at   | Rgs9     | regulator of G-protein signaling 9                                               | Cluster0004_High in MIN-6-Pancreatic beta cell, insulin secreting |
| 1428055_at   | Rian     | RNA imprinted and accumulated in nucleus                                         | Cluster0004_High in MIN-6-Pancreatic beta cell, insulin secreting |
| 1440001_at   | Rian     | RNA imprinted and accumulated in nucleus                                         | Cluster0004_High in MIN-6-Pancreatic beta cell, insulin secreting |
| 1441625_at   | Rimbp2   | RIMS binding protein 2                                                           | Cluster0004_High in MIN-6-Pancreatic beta cell, insulin secreting |
| 1455378_at   | Rimk1a   | ribosomal modification protein rimK-like family member A                         | Cluster0004_High in MIN-6-Pancreatic beta cell, insulin secreting |
| 1448125_at   | Rit2     | Ras-like without CAAX 2                                                          | Cluster0004_High in MIN-6-Pancreatic beta cell, insulin secreting |
| 1460166_at   | Rit2     | Ras-like without CAAX 2                                                          | Cluster0004_High in MIN-6-Pancreatic beta cell, insulin secreting |
| 1450708_at   | Scg2     | secretogranin II                                                                 | Cluster0004_High in MIN-6-Pancreatic beta cell, insulin secreting |
| 1423150_at   | Scg5     | secretogranin V                                                                  | Cluster0004_High in MIN-6-Pancreatic beta cell, insulin secreting |
| 1451534_at   | Scgn     | secretagogin, EF-hand calcium binding protein                                    | Cluster0004_High in MIN-6-Pancreatic beta cell, insulin secreting |
| 1417671_at   | Scly     | selenocysteine lyase                                                             | Cluster0004_High in MIN-6-Pancreatic beta cell, insulin secreting |
| 1441192_at   | Scly     | selenocysteine lyase                                                             | Cluster0004_High in MIN-6-Pancreatic beta cell, insulin secreting |
| 1436084_at   | Scrt1    | scratch homolog 1, zinc finger protein (Drosophila)                              | Cluster0004_High in MIN-6-Pancreatic beta cell, insulin secreting |
| 1448443_at   | Serpini1 | serine (or cysteine) peptidase inhibitor, clade I, member 1                      | Cluster0004_High in MIN-6-Pancreatic beta cell, insulin secreting |
| 1440128_s_at | Sez6l    | seizure related 6 homolog like                                                   | Cluster0004_High in MIN-6-Pancreatic beta cell, insulin secreting |
| 1423983_at   | Sez6l2   | seizure related 6 homolog like 2                                                 | Cluster0004_High in MIN-6-Pancreatic beta cell, insulin secreting |
| 1434641_x_at | Sez6l2   | seizure related 6 homolog like 2                                                 | Cluster0004_High in MIN-6-Pancreatic beta cell, insulin secreting |
| 1449967_at   | Sim1     | single-minded homolog 1 (Drosophila)                                             | Cluster0004_High in MIN-6-Pancreatic beta cell, insulin secreting |
| 1434188_at   | Slc16a12 | solute carrier family 16 (monocarboxylic acid transporters), member 12           | Cluster0004_High in MIN-6-Pancreatic beta cell, insulin secreting |
| 1429225_at   | Slc24a2  | solute carrier family 24 (sodium/potassium/calcium exchanger), member 2          | Cluster0004_High in MIN-6-Pancreatic beta cell, insulin secreting |
| 1444027_at   | Slc30a8  | solute carrier family 30 (zinc transporter), member 8                            | Cluster0004_High in MIN-6-Pancreatic beta cell, insulin secreting |
| 1428111_at   | Slc38a4  | solute carrier family 38, member 4                                               | Cluster0004_High in MIN-6-Pancreatic beta cell, insulin secreting |
| 1448889_at   | Slc38a4  | solute carrier family 38, member 4                                               | Cluster0004_High in MIN-6-Pancreatic beta cell, insulin secreting |
| 1454622_at   | Slc38a5  | solute carrier family 38, member 5                                               | Cluster0004_High in MIN-6-Pancreatic beta cell, insulin secreting |
| 1417672_at   | Slc4a10  | solute carrier family 4, sodium bicarbonate cotransporter-like, member 10        | Cluster0004_High in MIN-6-Pancreatic beta cell, insulin secreting |
| 1436137_at   | Slc6a17  | solute carrier family 6 (neurotransmitter transporter), member 17                | Cluster0004_High in MIN-6-Pancreatic beta cell, insulin secreting |
| 1458394_at   | Slc6a17  | solute carrier family 6 (neurotransmitter transporter), member 17                | Cluster0004_High in MIN-6-Pancreatic beta cell, insulin secreting |
| 1439607_at   | Slc7a14  | solute carrier family 7 (cationic amino acid transporter, y+ system), member 14  | Cluster0004_High in MIN-6-Pancreatic beta cell, insulin secreting |
| 1425277_at   | Slit1    | slit homolog 1 (Drosophila)                                                      | Cluster0004_High in MIN-6-Pancreatic beta cell, insulin secreting |
| 1429718_at   | Slitrk5  | SLIT and NTRK-like family, member 5                                              | Cluster0004_High in MIN-6-Pancreatic beta cell, insulin secreting |
| 1437231_at   | Slitrk6  | SLIT and NTRK-like family, member 6                                              | Cluster0004_High in MIN-6-Pancreatic beta cell, insulin secreting |
| 1424118_a_at | Spc25    | SPC25, NDC80 kinetochore complex component, homolog (S. cerevisiae)              | Cluster0004_High in MIN-6-Pancreatic beta cell, insulin secreting |
| 1453815_at   | Spc25    | SPC25, NDC80 kinetochore complex component, homolog (S. cerevisiae)              | Cluster0004_High in MIN-6-Pancreatic beta cell, insulin secreting |
| 1429470_at   | Spdya    | speedy homolog A (Xenopus laevis)                                                | Cluster0004_High in MIN-6-Pancreatic beta cell, insulin secreting |
| 1454926_at   | Sphkap   | SPHK1 interactor, AKAP domain containing                                         | Cluster0004_High in MIN-6-Pancreatic beta cell, insulin secreting |
| 1425116_a_at | Spnb4    | spectrin beta 4                                                                  | Cluster0004_High in MIN-6-Pancreatic beta cell, insulin secreting |
| 1419672_at   | Spock1   | sparc/osteonectin, cwcv and kazal-like domains proteoglycan 1                    | Cluster0004_High in MIN-6-Pancreatic beta cell, insulin secreting |

|              |                                |                                                                                                                     |                                                                   |
|--------------|--------------------------------|---------------------------------------------------------------------------------------------------------------------|-------------------------------------------------------------------|
| 1441603_at   | Sstr3                          | somatostatin receptor 3                                                                                             | Cluster0004_High in MIN-6-Pancreatic beta cell, insulin secreting |
| 1436793_at   | St18                           | suppression of tumorigenicity 18                                                                                    | Cluster0004_High in MIN-6-Pancreatic beta cell, insulin secreting |
| 1455123_at   | St18                           | suppression of tumorigenicity 18                                                                                    | Cluster0004_High in MIN-6-Pancreatic beta cell, insulin secreting |
| 1421735_a_at | St8sia5                        | ST8 alpha-N-acetyl-neuraminide alpha-2,8-sialyltransferase 5                                                        | Cluster0004_High in MIN-6-Pancreatic beta cell, insulin secreting |
| 1456818_at   | Stk32a                         | serine/threonine kinase 32A                                                                                         | Cluster0004_High in MIN-6-Pancreatic beta cell, insulin secreting |
| 1456883_at   | Stox1                          | storkhead box 1                                                                                                     | Cluster0004_High in MIN-6-Pancreatic beta cell, insulin secreting |
| 1420505_a_at | Stxbp1                         | syntaxin binding protein 1                                                                                          | Cluster0004_High in MIN-6-Pancreatic beta cell, insulin secreting |
| 1420506_a_at | Stxbp1                         | syntaxin binding protein 1                                                                                          | Cluster0004_High in MIN-6-Pancreatic beta cell, insulin secreting |
| 1423406_at   | Sv2a                           | synaptic vesicle glycoprotein 2 a                                                                                   | Cluster0004_High in MIN-6-Pancreatic beta cell, insulin secreting |
| 1434800_at   | Sv2b                           | synaptic vesicle glycoprotein 2 b                                                                                   | Cluster0004_High in MIN-6-Pancreatic beta cell, insulin secreting |
| 1435687_at   | Sv2b                           | synaptic vesicle glycoprotein 2 b                                                                                   | Cluster0004_High in MIN-6-Pancreatic beta cell, insulin secreting |
| 1451484_a_at | Syn1                           | synapsin I                                                                                                          | Cluster0004_High in MIN-6-Pancreatic beta cell, insulin secreting |
| 1423640_at   | Synpr                          | synaptoporin                                                                                                        | Cluster0004_High in MIN-6-Pancreatic beta cell, insulin secreting |
| 1448280_at   | Syp                            | synaptophysin                                                                                                       | Cluster0004_High in MIN-6-Pancreatic beta cell, insulin secreting |
| 1434470_at   | Syt13                          | synaptotagmin XIII                                                                                                  | Cluster0004_High in MIN-6-Pancreatic beta cell, insulin secreting |
| 1451045_at   | Syt13                          | synaptotagmin XIII                                                                                                  | Cluster0004_High in MIN-6-Pancreatic beta cell, insulin secreting |
| 1420418_at   | Syt2                           | synaptotagmin II                                                                                                    | Cluster0004_High in MIN-6-Pancreatic beta cell, insulin secreting |
| 1440323_at   | Syt2                           | synaptotagmin II                                                                                                    | Cluster0004_High in MIN-6-Pancreatic beta cell, insulin secreting |
| 1449866_at   | Syt2                           | synaptotagmin II                                                                                                    | Cluster0004_High in MIN-6-Pancreatic beta cell, insulin secreting |
| 1415844_at   | Syt4                           | synaptotagmin IV                                                                                                    | Cluster0004_High in MIN-6-Pancreatic beta cell, insulin secreting |
| 1415845_at   | Syt4                           | synaptotagmin IV                                                                                                    | Cluster0004_High in MIN-6-Pancreatic beta cell, insulin secreting |
| 1422531_at   | Syt5                           | synaptotagmin V                                                                                                     | Cluster0004_High in MIN-6-Pancreatic beta cell, insulin secreting |
| 1460081_at   | Syt7                           | synaptotagmin VII                                                                                                   | Cluster0004_High in MIN-6-Pancreatic beta cell, insulin secreting |
| 1417336_a_at | Syt14                          | synaptotagmin-like 4                                                                                                | Cluster0004_High in MIN-6-Pancreatic beta cell, insulin secreting |
| 1450961_a_at | Tceal3 /// Tceal5 /// Tceal6   | transcription elongation factor A (SII)-like 3 /// transcription elongation factor A (SII)-like 5 /// transcription | Cluster0004_High in MIN-6-Pancreatic beta cell, insulin secreting |
| 1420546_at   | Th                             | tyrosine hydroxylase                                                                                                | Cluster0004_High in MIN-6-Pancreatic beta cell, insulin secreting |
| 1455148_at   | Tmem130                        | transmembrane protein 130                                                                                           | Cluster0004_High in MIN-6-Pancreatic beta cell, insulin secreting |
| 1436754_at   | Tmem179                        | transmembrane protein 179                                                                                           | Cluster0004_High in MIN-6-Pancreatic beta cell, insulin secreting |
| 1435858_at   | Tmem215                        | transmembrane protein 215                                                                                           | Cluster0004_High in MIN-6-Pancreatic beta cell, insulin secreting |
| 1458866_at   | Tmem215                        | transmembrane protein 215                                                                                           | Cluster0004_High in MIN-6-Pancreatic beta cell, insulin secreting |
| 1435064_a_at | Tmem27                         | transmembrane protein 27                                                                                            | Cluster0004_High in MIN-6-Pancreatic beta cell, insulin secreting |
| 1452825_at   | Tmem59l                        | transmembrane protein 59-like                                                                                       | Cluster0004_High in MIN-6-Pancreatic beta cell, insulin secreting |
| 1438355_at   | Tmem90a                        | transmembrane protein 90a                                                                                           | Cluster0004_High in MIN-6-Pancreatic beta cell, insulin secreting |
| 1458342_at   | Tmem90a                        | transmembrane protein 90a                                                                                           | Cluster0004_High in MIN-6-Pancreatic beta cell, insulin secreting |
| 1455213_at   | Tmsb15b1-Tmsb15b2 /// Tmsb15b2 | Tmsb15b1-Tmsb15b2 readthrough transcript /// thymosin beta 15b2                                                     | Cluster0004_High in MIN-6-Pancreatic beta cell, insulin secreting |
| 1436600_at   | Tox3                           | TOX high mobility group box family member 3                                                                         | Cluster0004_High in MIN-6-Pancreatic beta cell, insulin secreting |
| 1427232_at   | Tshz1                          | teashirt zinc finger family member 1                                                                                | Cluster0004_High in MIN-6-Pancreatic beta cell, insulin secreting |
| 1424029_at   | Tspyl4                         | TSPY-like 4                                                                                                         | Cluster0004_High in MIN-6-Pancreatic beta cell, insulin secreting |
| 1427661_a_at | Tssc4                          | tumor-suppressing subchromosomal transferable fragment 4                                                            | Cluster0004_High in MIN-6-Pancreatic beta cell, insulin secreting |
| 1435456_at   | Ttc28                          | tetratricopeptide repeat domain 28                                                                                  | Cluster0004_High in MIN-6-Pancreatic beta cell, insulin secreting |
| 1451580_a_at | Ttr                            | transthyretin                                                                                                       | Cluster0004_High in MIN-6-Pancreatic beta cell, insulin secreting |
| 1454608_x_at | Ttr                            | transthyretin                                                                                                       | Cluster0004_High in MIN-6-Pancreatic beta cell, insulin secreting |
| 1455913_x_at | Ttr                            | transthyretin                                                                                                       | Cluster0004_High in MIN-6-Pancreatic beta cell, insulin secreting |
| 1459737_s_at | Ttr                            | transthyretin                                                                                                       | Cluster0004_High in MIN-6-Pancreatic beta cell, insulin secreting |
| 1441439_at   | Ucn3                           | urocortin 3                                                                                                         | Cluster0004_High in MIN-6-Pancreatic beta cell, insulin secreting |
| 1434989_at   | Unc80                          | unc-80 homolog (C. elegans)                                                                                         | Cluster0004_High in MIN-6-Pancreatic beta cell, insulin secreting |
| 1455714_at   | Vstm2l                         | V-set and transmembrane domain containing 2-like                                                                    | Cluster0004_High in MIN-6-Pancreatic beta cell, insulin secreting |
| 1435124_at   | Vwa5b2                         | von Willebrand factor A domain containing 5B2                                                                       | Cluster0004_High in MIN-6-Pancreatic beta cell, insulin secreting |
| 1443369_at   | Vwa5b2                         | von Willebrand factor A domain containing 5B2                                                                       | Cluster0004_High in MIN-6-Pancreatic beta cell, insulin secreting |
| 1456645_at   | Wdr25                          | WD repeat domain 25                                                                                                 | Cluster0004_High in MIN-6-Pancreatic beta cell, insulin secreting |
| 1452654_at   | Zdhhc2                         | zinc finger, DHHC domain containing 2                                                                               | Cluster0004_High in MIN-6-Pancreatic beta cell, insulin secreting |
| 1452656_at   | Zdhhc2                         | zinc finger, DHHC domain containing 2                                                                               | Cluster0004_High in MIN-6-Pancreatic beta cell, insulin secreting |
| 1429471_at   | 1110017D15Rik                  | RIKEN cDNA 1110017D15 gene                                                                                          | Cluster0005_High in NALT                                          |
| 1435987_x_at | 1110059G02Rik                  | RIKEN cDNA 1110059G02 gene                                                                                          | Cluster0005_High in NALT                                          |
| 1436203_a_at | 1110059G02Rik                  | RIKEN cDNA 1110059G02 gene                                                                                          | Cluster0005_High in NALT                                          |
| 1436204_at   | 1110059G02Rik                  | RIKEN cDNA 1110059G02 gene                                                                                          | Cluster0005_High in NALT                                          |
| 1438288_x_at | 1110059G02Rik                  | RIKEN cDNA 1110059G02 gene                                                                                          | Cluster0005_High in NALT                                          |

|                        |                                     |                                                                                                       |                          |
|------------------------|-------------------------------------|-------------------------------------------------------------------------------------------------------|--------------------------|
| 1431786_s_at           | 1190003J15Rik                       | RIKEN cDNA 1190003J15 gene                                                                            | Cluster0005_High in NALT |
| 1425737_at             | 1500002F19Rik /// BC002195          | RIKEN cDNA 1500002F19 gene /// cDNA sequence BC002195                                                 | Cluster0005_High in NALT |
| 1423933_a_at           | 1600029D21Rik                       | RIKEN cDNA 1600029D21 gene                                                                            | Cluster0005_High in NALT |
| 1454254_s_at           | 1600029D21Rik                       | RIKEN cDNA 1600029D21 gene                                                                            | Cluster0005_High in NALT |
| 1430852_at             | 1600029I14Rik                       | RIKEN cDNA 1600029I14 gene                                                                            | Cluster0005_High in NALT |
| 1432513_a_at           | 1700001C02Rik                       | RIKEN cDNA 1700001C02 gene                                                                            | Cluster0005_High in NALT |
| 1429851_at             | 1700003M02Rik                       | RIKEN cDNA 1700003M02 gene                                                                            | Cluster0005_High in NALT |
| 1429181_at             | 1700009P17Rik                       | RIKEN cDNA 1700009P17 gene                                                                            | Cluster0005_High in NALT |
| 1428962_at             | 1700013F07Rik                       | RIKEN cDNA 1700013F07 gene                                                                            | Cluster0005_High in NALT |
| 1436593_at             | 1700016K19Rik                       | RIKEN cDNA 1700016K19 gene                                                                            | Cluster0005_High in NALT |
| 1441861_at             | 1700018G05Rik                       | RIKEN cDNA 1700018G05 gene                                                                            | Cluster0005_High in NALT |
| 1429845_at             | 1700019L03Rik                       | RIKEN cDNA 1700019L03 gene                                                                            | Cluster0005_High in NALT |
| 1429074_at             | 1700026D08Rik                       | RIKEN cDNA 1700026D08 gene                                                                            | Cluster0005_High in NALT |
| 1453320_at             | 1700027A23Rik                       | RIKEN cDNA 1700027A23 gene                                                                            | Cluster0005_High in NALT |
| 1419326_at             | 1700028P14Rik                       | RIKEN cDNA 1700028P14 gene                                                                            | Cluster0005_High in NALT |
| 1428812_at             | 1700040L02Rik                       | RIKEN cDNA 1700040L02 gene                                                                            | Cluster0005_High in NALT |
| 1422774_at             | 1700088E04Rik                       | RIKEN cDNA 1700088E04 gene                                                                            | Cluster0005_High in NALT |
| 1429907_at             | 1700094D03Rik                       | RIKEN cDNA 1700094D03 gene                                                                            | Cluster0005_High in NALT |
| 1447556_x_at           | 1700094D03Rik                       | RIKEN cDNA 1700094D03 gene                                                                            | Cluster0005_High in NALT |
| 1432559_at             | 2210409D07Rik                       | RIKEN cDNA 2210409D07 gene                                                                            | Cluster0005_High in NALT |
| 1429419_at             | 2310007A19Rik                       | RIKEN cDNA 2310007A19Rik                                                                              | Cluster0005_High in NALT |
| 1419643_s_at           | 2310057J18Rik /// 2310065H11Rik     | RIKEN cDNA 2310057J18 gene /// RIKEN cDNA 2310065H11 gene                                             | Cluster0005_High in NALT |
| 1431991_at             | 2410004P03Rik                       | RIKEN cDNA 2410004P03 gene                                                                            | Cluster0005_High in NALT |
| 1439528_at             | 4833423E24Rik                       | RIKEN cDNA 4833423E24 gene                                                                            | Cluster0005_High in NALT |
| 1430762_at             | 4833427G06Rik                       | RIKEN cDNA 4833427G06 gene                                                                            | Cluster0005_High in NALT |
| 1430211_at             | 4930415O20Rik                       | RIKEN cDNA 4930415O20 gene                                                                            | Cluster0005_High in NALT |
| 1452480_at             | 4930529M08Rik                       | RIKEN cDNA 4930529M08 gene                                                                            | Cluster0005_High in NALT |
| 1418870_at             | 4930579J09Rik                       | RIKEN cDNA 4930579J09 gene                                                                            | Cluster0005_High in NALT |
| 1429744_at             | 4931407G18Rik                       | RIKEN cDNA 4931407G18 gene                                                                            | Cluster0005_High in NALT |
| 1456711_at             | 4932425I24Rik                       | RIKEN cDNA 4932425I24 gene                                                                            | Cluster0005_High in NALT |
| 1453176_a_at           | 4933404M02Rik                       | RIKEN cDNA 4933404M02 gene                                                                            | Cluster0005_High in NALT |
| 1453521_at             | 4933405L10Rik                       | RIKEN cDNA 4933405L10 gene                                                                            | Cluster0005_High in NALT |
| 1427066_a_at           | 4933439F18Rik                       | RIKEN cDNA 4933439F18 gene                                                                            | Cluster0005_High in NALT |
| 1430067_at             | 5430401F13Rik /// Gm6619            | RIKEN cDNA 5430401F13 gene /// predicted gene 6619                                                    | Cluster0005_High in NALT |
| 1430518_at             | 5430402E10Rik                       | RIKEN cDNA 5430402E10 gene                                                                            | Cluster0005_High in NALT |
| 1433967_at             | 5430413K10Rik                       | RIKEN cDNA 5430413K10 gene                                                                            | Cluster0005_High in NALT |
| 1460496_at             | 5430413K10Rik                       | RIKEN cDNA 5430413K10 gene                                                                            | Cluster0005_High in NALT |
| 1441109_at             | 5430414B12Rik                       | RIKEN cDNA 5430414B12 gene                                                                            | Cluster0005_High in NALT |
| 1447773_x_at           | 6330409D20Rik                       | RIKEN cDNA 6330409D20 gene                                                                            | Cluster0005_High in NALT |
| 1441306_at             | 6820408C15Rik                       | RIKEN cDNA 6820408C15 gene                                                                            | Cluster0005_High in NALT |
| 1431250_at             | 9030624G23Rik /// Gm5784 /// Gm9295 | RIKEN cDNA 9030624G23 gene /// predicted gene 5784 /// predicted gene 9295 /// predicted gene 9306 // | Cluster0005_High in NALT |
| 1429394_at             | A130010J15Rik                       | RIKEN cDNA A130010J15 gene                                                                            | Cluster0005_High in NALT |
| 1458930_at             | A4gnt                               | alpha-1,4-N-acetylglucosaminyltransferase                                                             | Cluster0005_High in NALT |
| 1423523_at             | Aass                                | aminoadipate-semialdehyde synthase                                                                    | Cluster0005_High in NALT |
| 1435751_at             | Abcc9                               | ATP-binding cassette, sub-family C (CFTR/MRP), member 9                                               | Cluster0005_High in NALT |
| 1424063_at             | Abpa                                | androgen binding protein alpha                                                                        | Cluster0005_High in NALT |
| 1425032_at             | Abpb                                | androgen binding protein beta                                                                         | Cluster0005_High in NALT |
| 1453943_a_at           | Acpp                                | acid phosphatase, prostate                                                                            | Cluster0005_High in NALT |
| AFFX-b-ActinMur/M Actb |                                     | actin, beta                                                                                           | Cluster0005_High in NALT |
| AFFX-b-ActinMur/M Actb |                                     | actin, beta                                                                                           | Cluster0005_High in NALT |
| 1436880_at             | Afp                                 | Alpha fetoprotein                                                                                     | Cluster0005_High in NALT |
| 1423396_at             | Agt                                 | angiotensinogen (serpin peptidase inhibitor, clade A, member 8)                                       | Cluster0005_High in NALT |
| 1440731_at             | AI413759                            | expressed sequence AI413759                                                                           | Cluster0005_High in NALT |
| 1427175_at             | AI428936                            | expressed sequence AI428936                                                                           | Cluster0005_High in NALT |
| 1427176_s_at           | AI428936                            | expressed sequence AI428936                                                                           | Cluster0005_High in NALT |
| 1457541_at             | Akap14                              | A kinase (PRKA) anchor protein 14                                                                     | Cluster0005_High in NALT |
| 1456317_at             | Aldh3b2                             | aldehyde dehydrogenase 3 family, member B2                                                            | Cluster0005_High in NALT |

|              |                                    |                                                                                                           |                          |
|--------------|------------------------------------|-----------------------------------------------------------------------------------------------------------|--------------------------|
| 1418858_at   | Aox3                               | aldehyde oxidase 3                                                                                        | Cluster0005_High in NALT |
| 1418818_at   | Aqp5 /// LOC100046616              | aquaporin 5 /// similar to aquaporin 5                                                                    | Cluster0005_High in NALT |
| 1424240_at   | Arfp2                              | ADP-ribosylation factor interacting protein 2                                                             | Cluster0005_High in NALT |
| 1435498_at   | Arfp2                              | ADP-ribosylation factor interacting protein 2                                                             | Cluster0005_High in NALT |
| 1451320_at   | Arhgap8                            | Rho GTPase activating protein 8                                                                           | Cluster0005_High in NALT |
| 1429815_at   | Armc3                              | armadillo repeat containing 3                                                                             | Cluster0005_High in NALT |
| 1456472_at   | Armc4                              | armadillo repeat containing 4                                                                             | Cluster0005_High in NALT |
| 1420780_at   | Ascl3                              | achaete-scute complex homolog 3 (Drosophila)                                                              | Cluster0005_High in NALT |
| 1421944_a_at | Asgr1                              | asialoglycoprotein receptor 1                                                                             | Cluster0005_High in NALT |
| 1456388_at   | Atp11a                             | ATPase, class VI, type 11A                                                                                | Cluster0005_High in NALT |
| 1436411_at   | Atp13a5                            | ATPase type 13A5                                                                                          | Cluster0005_High in NALT |
| 1439172_at   | Atp13a5                            | ATPase type 13A5                                                                                          | Cluster0005_High in NALT |
| 1419373_at   | Atp6v1b1                           | ATPase, H+ transporting, lysosomal V1 subunit B1                                                          | Cluster0005_High in NALT |
| 1430306_a_at | Atp6v1c2                           | ATPase, H+ transporting, lysosomal V1 subunit C2                                                          | Cluster0005_High in NALT |
| 1455172_at   | AU020094                           | expressed sequence AU020094                                                                               | Cluster0005_High in NALT |
| 1458500_at   | AU021034                           | expressed sequence AU021034                                                                               | Cluster0005_High in NALT |
| 1455144_s_at | AU040829                           | expressed sequence AU040829                                                                               | Cluster0005_High in NALT |
| 1443946_s_at | AU040972                           | expressed sequence AU040972                                                                               | Cluster0005_High in NALT |
| 1417776_at   | Azgp1                              | alpha-2-glycoprotein 1, zinc                                                                              | Cluster0005_High in NALT |
| 1421761_a_at | Barx2                              | BarH-like homeobox 2                                                                                      | Cluster0005_High in NALT |
| 1425121_a_at | BC006965                           | cDNA sequence BC006965                                                                                    | Cluster0005_High in NALT |
| 1440889_at   | BC006965                           | cDNA sequence BC006965                                                                                    | Cluster0005_High in NALT |
| 1425046_at   | BC018465                           | cDNA sequence BC018465                                                                                    | Cluster0005_High in NALT |
| 1436503_at   | BC048546                           | cDNA sequence BC048546                                                                                    | Cluster0005_High in NALT |
| 1441979_at   | BC060267                           | cDNA sequence BC060267                                                                                    | Cluster0005_High in NALT |
| 1416647_at   | Bckdha                             | branched chain ketoacid dehydrogenase E1, alpha polypeptide                                               | Cluster0005_High in NALT |
| 1443813_x_at | Bckdk                              | branched chain ketoacid dehydrogenase kinase                                                              | Cluster0005_High in NALT |
| 1460644_at   | Bckdk                              | branched chain ketoacid dehydrogenase kinase                                                              | Cluster0005_High in NALT |
| 1449880_s_at | Bglap /// Bglap-rs1 /// Bglap2     | bone gamma carboxyglutamate protein /// bone gamma-carboxyglutamate protein, related sequence 1 //        | Cluster0005_High in NALT |
| 1418800_at   | Bhlha15                            | basic helix-loop-helix family, member a15                                                                 | Cluster0005_High in NALT |
| 1449233_at   | Bhlha15                            | basic helix-loop-helix family, member a15                                                                 | Cluster0005_High in NALT |
| 1428669_at   | Bmyc                               | brain expressed myelocytomatosis oncogene                                                                 | Cluster0005_High in NALT |
| 1420683_at   | Bnipl                              | BCL2/adenovirus E1B 19kD interacting protein like                                                         | Cluster0005_High in NALT |
| 1458386_at   | C030009J22Rik                      | RIKEN cDNA C030009J22 gene                                                                                | Cluster0005_High in NALT |
| 1418608_at   | Calm13                             | calmodulin-like 3                                                                                         | Cluster0005_High in NALT |
| 1421001_a_at | Car6                               | carbonic anhydrase 6                                                                                      | Cluster0005_High in NALT |
| 1434983_at   | Ccdc108                            | coiled-coil domain containing 108                                                                         | Cluster0005_High in NALT |
| 1436285_at   | Ccdc113                            | coiled-coil domain containing 113                                                                         | Cluster0005_High in NALT |
| 1456766_at   | Ccdc151                            | coiled-coil domain containing 151                                                                         | Cluster0005_High in NALT |
| 1458104_a_at | Ccdc153                            | coiled-coil domain containing 153                                                                         | Cluster0005_High in NALT |
| 1430638_at   | Ccdc30                             | coiled-coil domain containing 30                                                                          | Cluster0005_High in NALT |
| 1429781_s_at | Ccdc39                             | coiled-coil domain containing 39                                                                          | Cluster0005_High in NALT |
| 1439864_at   | Ccdc40                             | coiled-coil domain containing 40                                                                          | Cluster0005_High in NALT |
| 1431839_a_at | Ccdc81                             | coiled-coil domain containing 81                                                                          | Cluster0005_High in NALT |
| 1419306_at   | Ccdc96                             | coiled-coil domain containing 96                                                                          | Cluster0005_High in NALT |
| 1424420_at   | Ccp1                               | cell cycle progression 1                                                                                  | Cluster0005_High in NALT |
| 1456937_at   | Cdh26                              | cadherin-like 26                                                                                          | Cluster0005_High in NALT |
| 1439147_at   | Cdhr3                              | cadherin-related family member 3                                                                          | Cluster0005_High in NALT |
| 1431780_at   | Cdhr4                              | cadherin-related family member 4                                                                          | Cluster0005_High in NALT |
| 1438142_s_at | Cdhr4                              | cadherin-related family member 4                                                                          | Cluster0005_High in NALT |
| 1433969_at   | Cdkl4                              | cyclin-dependent kinase-like 4                                                                            | Cluster0005_High in NALT |
| 1448842_at   | Cdo1                               | cysteine dioxygenase 1, cytosolic                                                                         | Cluster0005_High in NALT |
| 1420569_at   | Chad                               | chondroadherin                                                                                            | Cluster0005_High in NALT |
| 1426147_s_at | Cldn10a                            | claudin 10A                                                                                               | Cluster0005_High in NALT |
| 1419735_at   | Csn3                               | casein kappa                                                                                              | Cluster0005_High in NALT |
| 1451610_at   | Cxcl17                             | chemokine (C-X-C motif) ligand 17                                                                         | Cluster0005_High in NALT |
| 1422230_s_at | Cyp2a4 /// Cyp2a5 /// LOC100047711 | cytochrome P450, family 2, subfamily a, polypeptide 4 /// cytochrome P450, family 2, subfamily a, polypep | Cluster0005_High in NALT |

|              |                                          |                                                                                                                            |                          |
|--------------|------------------------------------------|----------------------------------------------------------------------------------------------------------------------------|--------------------------|
| 1419731_at   | Cyp2b19                                  | cytochrome P450, family 2, subfamily b, polypeptide 19                                                                     | Cluster0005_High in NALT |
| 1448792_a_at | Cyp2f2                                   | cytochrome P450, family 2, subfamily f, polypeptide 2                                                                      | Cluster0005_High in NALT |
| 1456978_s_at | D19Ert652e                               | DNA segment, Chr 19, ERATO Doi 652, expressed                                                                              | Cluster0005_High in NALT |
| 1439096_at   | Ddo                                      | D-aspartate oxidase                                                                                                        | Cluster0005_High in NALT |
| 1453677_a_at | Derl3                                    | Der1-like domain family, member 3                                                                                          | Cluster0005_High in NALT |
| 1444395_at   | Dixdc1                                   | DIX domain containing 1                                                                                                    | Cluster0005_High in NALT |
| 1440707_at   | Dmrt3                                    | doublesex and mab-3 related transcription factor 3                                                                         | Cluster0005_High in NALT |
| 1441579_at   | Dmrt1                                    | doublesex and mab-3 related transcription factor like family A1                                                            | Cluster0005_High in NALT |
| 1421434_at   | Dnahc5                                   | dynein, axonemal, heavy chain 5                                                                                            | Cluster0005_High in NALT |
| 1457401_at   | Dnahc9                                   | dynein, axonemal, heavy chain 9                                                                                            | Cluster0005_High in NALT |
| 1436296_x_at | Dnaic2                                   | dynein, axonemal, intermediate chain 2                                                                                     | Cluster0005_High in NALT |
| 1436126_at   | Dnali1                                   | dynein, axonemal, light intermediate polypeptide 1                                                                         | Cluster0005_High in NALT |
| 1455379_at   | Dnali1                                   | dynein, axonemal, light intermediate polypeptide 1                                                                         | Cluster0005_High in NALT |
| 1428987_at   | Dynlrb2                                  | dynein light chain roadblock-type 2                                                                                        | Cluster0005_High in NALT |
| 1453558_at   | Efcab10                                  | EF-hand calcium binding domain 10                                                                                          | Cluster0005_High in NALT |
| 1427367_at   | Efcab4a                                  | EF-hand calcium binding domain 4A                                                                                          | Cluster0005_High in NALT |
| 1453159_at   | Efhc1                                    | EF-hand domain (C-terminal) containing 1                                                                                   | Cluster0005_High in NALT |
| 1418093_a_at | Egf                                      | epidermal growth factor                                                                                                    | Cluster0005_High in NALT |
| 1419555_at   | Elf5                                     | E74-like factor 5                                                                                                          | Cluster0005_High in NALT |
| 1419556_at   | Elf5                                     | E74-like factor 5                                                                                                          | Cluster0005_High in NALT |
| 1428960_at   | Enkur                                    | enkurin, TRPC channel interacting protein                                                                                  | Cluster0005_High in NALT |
| 1444614_x_at | Eno4                                     | enolase 4                                                                                                                  | Cluster0005_High in NALT |
| 1457693_a_at | Eno4                                     | enolase 4                                                                                                                  | Cluster0005_High in NALT |
| 1449190_a_at | Entpd4 /// LOC100048085                  | ectonucleoside triphosphate diphosphohydrolase 4 /// similar to ectonucleoside triphosphate diphosphohydrolase 4           | Cluster0005_High in NALT |
| 1417160_s_at | Expi                                     | extracellular proteinase inhibitor                                                                                         | Cluster0005_High in NALT |
| 1447743_x_at | Ext2                                     | exostoses (multiple) 2                                                                                                     | Cluster0005_High in NALT |
| 1435918_at   | Fam107a                                  | family with sequence similarity 107, member A                                                                              | Cluster0005_High in NALT |
| 1460107_at   | Fam154b                                  | family with sequence similarity 154, member B                                                                              | Cluster0005_High in NALT |
| 1440898_at   | Fam179a                                  | family with sequence similarity 179, member A                                                                              | Cluster0005_High in NALT |
| 1433877_at   | Fam46b                                   | family with sequence similarity 46, member B                                                                               | Cluster0005_High in NALT |
| 1455383_at   | Fam47e                                   | family with sequence similarity 47, member E                                                                               | Cluster0005_High in NALT |
| 1419567_at   | Fank1                                    | fibronectin type 3 and ankyrin repeat domains 1                                                                            | Cluster0005_High in NALT |
| 1425925_at   | Fcamr                                    | Fc receptor, IgA, IgM, high affinity                                                                                       | Cluster0005_High in NALT |
| 1429991_at   | Fezf1                                    | Fez family zinc finger 1                                                                                                   | Cluster0005_High in NALT |
| 1449525_at   | Fmo3                                     | flavin containing monooxygenase 3                                                                                          | Cluster0005_High in NALT |
| 1449458_at   | Foxi1                                    | forkhead box J1                                                                                                            | Cluster0005_High in NALT |
| 1425291_at   | Foxj1                                    | forkhead box J1                                                                                                            | Cluster0005_High in NALT |
| 1419378_a_at | Fxyd2                                    | FXYP domain-containing ion transport regulator 2                                                                           | Cluster0005_High in NALT |
| 1419379_x_at | Fxyd2                                    | FXYP domain-containing ion transport regulator 2                                                                           | Cluster0005_High in NALT |
| 1456601_x_at | Fxyd2                                    | FXYP domain-containing ion transport regulator 2                                                                           | Cluster0005_High in NALT |
| 1418374_at   | Fxyd3                                    | FXYP domain-containing ion transport regulator 3                                                                           | Cluster0005_High in NALT |
| 1429330_at   | Gabra4                                   | gamma-aminobutyric acid (GABA) A receptor, subunit alpha 4                                                                 | Cluster0005_High in NALT |
| 1424647_at   | Gabrp                                    | gamma-aminobutyric acid (GABA) A receptor, pi                                                                              | Cluster0005_High in NALT |
| 1451424_at   | Gabrp                                    | gamma-aminobutyric acid (GABA) A receptor, pi                                                                              | Cluster0005_High in NALT |
| 1417589_at   | Galnt3                                   | UDP-N-acetyl-alpha-D-galactosamine:polypeptide N-acetylgalactosaminyltransferase 3                                         | Cluster0005_High in NALT |
| 1425882_at   | Gdf2                                     | growth differentiation factor 2                                                                                            | Cluster0005_High in NALT |
| 1419139_at   | Gdf5                                     | growth differentiation factor 5                                                                                            | Cluster0005_High in NALT |
| 1448766_at   | Gjb1                                     | gap junction protein, beta 1                                                                                               | Cluster0005_High in NALT |
| 1448767_s_at | Gjb1                                     | gap junction protein, beta 1                                                                                               | Cluster0005_High in NALT |
| 1459850_x_at | Glr1b                                    | glycine receptor, beta subunit                                                                                             | Cluster0005_High in NALT |
| 1438927_x_at | Gm10335 /// Gm3362 /// Gm3940 /// Gm3941 | predicted gene 10335 /// predicted pseudogene 3362 /// predicted gene 3940 /// predicted gene 7413 /// predicted gene 7414 | Cluster0005_High in NALT |
| 1455973_at   | Gm11992                                  | predicted gene 11992                                                                                                       | Cluster0005_High in NALT |
| 1422403_at   | Gm12597 /// Gm13280 /// Ifna1 /// Ifna1  | predicted gene 12597 /// predicted gene 13280 /// interferon alpha 1 /// interferon alpha 12 /// interferon alpha 12       | Cluster0005_High in NALT |
| 1449597_at   | Gm14743                                  | predicted gene 14743                                                                                                       | Cluster0005_High in NALT |
| 1446591_at   | Gm1574 /// LOC100045399                  | predicted gene 1574 /// similar to Gene model 1574, (NCBI)                                                                 | Cluster0005_High in NALT |
| 1429086_at   | Gm16136 /// Grhl2                        | predicted gene 16136 /// grainyhead-like 2 (Drosophila)                                                                    | Cluster0005_High in NALT |
| 1434634_at   | Gm166                                    | predicted gene 166                                                                                                         | Cluster0005_High in NALT |

|                |                                           |                                                                                                                 |                          |
|----------------|-------------------------------------------|-----------------------------------------------------------------------------------------------------------------|--------------------------|
| 1437418_at     | Gm3515                                    | predicted gene 3515                                                                                             | Cluster0005_High in NALT |
| 1443941_at     | Gm447                                     | predicted gene 447                                                                                              | Cluster0005_High in NALT |
| 1458506_at     | Gm626 /// LOC100046336                    | predicted gene 626 /// hypothetical protein LOC100046336                                                        | Cluster0005_High in NALT |
| 1456823_at     | Gm70                                      | predicted gene 70                                                                                               | Cluster0005_High in NALT |
| 1437498_at     | Gm9971                                    | predicted gene 9971                                                                                             | Cluster0005_High in NALT |
| 1417422_at     | Gnmt                                      | glycine N-methyltransferase                                                                                     | Cluster0005_High in NALT |
| 1434007_at     | Gylt1b                                    | glycosyltransferase-like 1B                                                                                     | Cluster0005_High in NALT |
| 1436295_at     | Hcrrt1 /// LOC100046129 /// LOC1000488    | hypocretin (orexin) receptor 1 /// similar to Hypocretin (orexin) receptor 1 /// similar to Hypocretin (orexin) | Cluster0005_High in NALT |
| 1435626_a_at   | Herpud1                                   | homocysteine-inducible, endoplasmic reticulum stress-inducible, ubiquitin-like domain member 1                  | Cluster0005_High in NALT |
| 1448185_at     | Herpud1                                   | homocysteine-inducible, endoplasmic reticulum stress-inducible, ubiquitin-like domain member 1                  | Cluster0005_High in NALT |
| 1451511_at     | Hibch                                     | 3-hydroxyisobutyryl-Coenzyme A hydrolase                                                                        | Cluster0005_High in NALT |
| 1418366_at     | Hist2h2aa1 /// Hist2h2aa2 /// Hist2h2ac / | histone cluster 2, H2aa1 /// histone cluster 2, H2aa2 /// histone cluster 2, H2ac /// histone cluster 2, H3c1   | Cluster0005_High in NALT |
| 1418367_x_at   | Hist2h2aa1 /// Hist2h2aa2 /// Hist2h2ac / | histone cluster 2, H2aa1 /// histone cluster 2, H2aa2 /// histone cluster 2, H2ac /// histone cluster 2, H3c1   | Cluster0005_High in NALT |
| 1422155_at     | Hist2h3c2                                 | histone cluster 2, H3c2                                                                                         | Cluster0005_High in NALT |
| 1460106_at     | Hydin                                     | hydrocephalus inducing                                                                                          | Cluster0005_High in NALT |
| 1435992_at     | lqca                                      | IQ motif containing with AAA domain                                                                             | Cluster0005_High in NALT |
| 1439400_x_at   | Kbtbd13                                   | kelch repeat and BTB (POZ) domain containing 13                                                                 | Cluster0005_High in NALT |
| 1425558_at     | Klc3                                      | kinesin light chain 3                                                                                           | Cluster0005_High in NALT |
| 1418213_at     | Krt23                                     | keratin 23                                                                                                      | Cluster0005_High in NALT |
| 1444322_at     | Lcn11                                     | lipocalin 11                                                                                                    | Cluster0005_High in NALT |
| 1428022_at     | Lcn13                                     | lipocalin 13                                                                                                    | Cluster0005_High in NALT |
| 1422306_at     | Lcn3                                      | lipocalin 3                                                                                                     | Cluster0005_High in NALT |
| 1450795_at     | Lhb                                       | luteinizing hormone beta                                                                                        | Cluster0005_High in NALT |
| 1423719_at     | LOC632073 /// U46068                      | similar to long palate, lung and nasal epithelium carcinoma associated 1 isoform 2 /// cDNA sequence U46068     | Cluster0005_High in NALT |
| 1430217_at     | Lrguk                                     | leucine-rich repeats and guanylate kinase domain containing                                                     | Cluster0005_High in NALT |
| 1432083_a_at   | Lrrc23                                    | leucine rich repeat containing 23                                                                               | Cluster0005_High in NALT |
| 1451498_at     | Lrrc26                                    | leucine rich repeat containing 26                                                                               | Cluster0005_High in NALT |
| 1457170_at     | Lrrc36                                    | leucine rich repeat containing 36                                                                               | Cluster0005_High in NALT |
| 1424340_at     | Lrrc48                                    | leucine rich repeat containing 48                                                                               | Cluster0005_High in NALT |
| 1420660_at     | Lrrc6                                     | leucine rich repeat containing 6 (testis)                                                                       | Cluster0005_High in NALT |
| 1440798_x_at   | Lrrc6                                     | leucine rich repeat containing 6 (testis)                                                                       | Cluster0005_High in NALT |
| 1453509_at     | Lypd2                                     | Ly6/Plaur domain containing 2                                                                                   | Cluster0005_High in NALT |
| 1449834_at     | Magix                                     | MAGI family member, X-linked                                                                                    | Cluster0005_High in NALT |
| 1429842_at     | Mdh1b                                     | malate dehydrogenase 1B, NAD (soluble)                                                                          | Cluster0005_High in NALT |
| 1423410_at     | Meig1                                     | meiosis expressed gene 1                                                                                        | Cluster0005_High in NALT |
| 1418589_a_at   | Mlf1                                      | myeloid leukemia factor 1                                                                                       | Cluster0005_High in NALT |
| 1425586_a_at   | Mlph                                      | melanophilin                                                                                                    | Cluster0005_High in NALT |
| 1449896_at     | Mlph                                      | melanophilin                                                                                                    | Cluster0005_High in NALT |
| 1452804_at     | Morn5                                     | MORN repeat containing 5                                                                                        | Cluster0005_High in NALT |
| 1420793_at     | Mup4                                      | major urinary protein 4                                                                                         | Cluster0005_High in NALT |
| 1426166_at     | Mup5                                      | major urinary protein 5                                                                                         | Cluster0005_High in NALT |
| 1456468_x_at   | Myadml2                                   | myeloid-associated differentiation marker-like 2                                                                | Cluster0005_High in NALT |
| 1427867_at     | Myh1                                      | Myosin, heavy polypeptide 1, skeletal muscle, adult                                                             | Cluster0005_High in NALT |
| 1435688_at     | NA                                        | ---                                                                                                             | Cluster0005_High in NALT |
| 1441099_at     | NA                                        | ---                                                                                                             | Cluster0005_High in NALT |
| 1442229_at     | NA                                        | ---                                                                                                             | Cluster0005_High in NALT |
| 1444517_at     | NA                                        | ---                                                                                                             | Cluster0005_High in NALT |
| 1444946_at     | NA                                        | ---                                                                                                             | Cluster0005_High in NALT |
| 1445349_at     | NA                                        | ---                                                                                                             | Cluster0005_High in NALT |
| 1445630_at     | NA                                        | ---                                                                                                             | Cluster0005_High in NALT |
| 1446860_at     | NA                                        | ---                                                                                                             | Cluster0005_High in NALT |
| 1447570_s_at   | NA                                        | ---                                                                                                             | Cluster0005_High in NALT |
| 1457883_at     | NA                                        | ---                                                                                                             | Cluster0005_High in NALT |
| 1457953_at     | NA                                        | ---                                                                                                             | Cluster0005_High in NALT |
| 1458356_at     | NA                                        | ---                                                                                                             | Cluster0005_High in NALT |
| 1459730_at     | NA                                        | ---                                                                                                             | Cluster0005_High in NALT |
| AFFX-ThrX-3_at | NA                                        | ---                                                                                                             | Cluster0005_High in NALT |

|                |               |                                                                              |                          |
|----------------|---------------|------------------------------------------------------------------------------|--------------------------|
| AFFX-ThrX-5_at | NA            | ---                                                                          | Cluster0005_High in NALT |
| AFFX-ThrX-M_at | NA            | ---                                                                          | Cluster0005_High in NALT |
| 1444163_at     | Nek5          | NIMA (never in mitosis gene a)-related expressed kinase 5                    | Cluster0005_High in NALT |
| 1431936_a_at   | Neu2          | neuraminidase 2                                                              | Cluster0005_High in NALT |
| 1417520_at     | Nfe2l3        | nuclear factor, erythroid derived 2, like 3                                  | Cluster0005_High in NALT |
| 1453614_a_at   | Nfe2l3        | nuclear factor, erythroid derived 2, like 3                                  | Cluster0005_High in NALT |
| 1422727_at     | Nme5          | non-metastatic cells 5, protein expressed in (nucleoside-diphosphate kinase) | Cluster0005_High in NALT |
| 1455034_at     | Nr4a2         | nuclear receptor subfamily 4, group A, member 2                              | Cluster0005_High in NALT |
| 1418355_at     | Nucb2         | nucleobindin 2                                                               | Cluster0005_High in NALT |
| 1451329_at     | Nudt22        | nudix (nucleoside diphosphate linked moiety X)-type motif 22                 | Cluster0005_High in NALT |
| 1460358_s_at   | Nudt22        | nudix (nucleoside diphosphate linked moiety X)-type motif 22                 | Cluster0005_High in NALT |
| 1453644_at     | Obp1a         | odorant binding protein 1a                                                   | Cluster0005_High in NALT |
| 1430186_at     | Odam          | odontogenic, ameloblast associated                                           | Cluster0005_High in NALT |
| 1437601_at     | Otx1          | orthodenticle homolog 1 (Drosophila)                                         | Cluster0005_High in NALT |
| 1451125_at     | Paip2b        | poly(A) binding protein interacting protein 2B                               | Cluster0005_High in NALT |
| 1417251_at     | Palmd         | palmdelphin                                                                  | Cluster0005_High in NALT |
| 1430335_a_at   | Pax3          | paired box gene 3                                                            | Cluster0005_High in NALT |
| 1441743_at     | Pax3          | paired box gene 3                                                            | Cluster0005_High in NALT |
| 1444596_at     | Pax7          | paired box gene 7                                                            | Cluster0005_High in NALT |
| 1448910_at     | Pecr          | peroxisomal trans-2-enoyl-CoA reductase                                      | Cluster0005_High in NALT |
| 1418835_at     | Phlda1        | pleckstrin homology-like domain, family A, member 1                          | Cluster0005_High in NALT |
| 1429936_at     | Pih1d2        | PIH1 domain containing 2                                                     | Cluster0005_High in NALT |
| 1451069_at     | Pim3          | proviral integration site 3                                                  | Cluster0005_High in NALT |
| 1449212_at     | Pip           | prolactin induced protein                                                    | Cluster0005_High in NALT |
| 1452026_a_at   | Pla2g12a      | phospholipase A2, group XIAA                                                 | Cluster0005_High in NALT |
| 1425338_at     | Plcb4         | phospholipase C, beta 4                                                      | Cluster0005_High in NALT |
| 1425339_at     | Plcb4         | phospholipase C, beta 4                                                      | Cluster0005_High in NALT |
| 1435771_at     | Plcb4         | phospholipase C, beta 4                                                      | Cluster0005_High in NALT |
| 1437842_at     | Plcxd1        | phosphatidylinositol-specific phospholipase C, X domain containing 1         | Cluster0005_High in NALT |
| 1415777_at     | Pnliprp1      | pancreatic lipase related protein 1                                          | Cluster0005_High in NALT |
| 1418190_at     | Pon1          | paraoxonase 1                                                                | Cluster0005_High in NALT |
| 1453310_at     | Ppil6         | peptidylprolyl isomerase (cyclophilin)-like 6                                | Cluster0005_High in NALT |
| 1425631_at     | Ppp1r3c       | protein phosphatase 1, regulatory (inhibitor) subunit 3C                     | Cluster0005_High in NALT |
| 1417047_at     | Prom2         | prominin 2                                                                   | Cluster0005_High in NALT |
| 1417048_at     | Prom2         | prominin 2                                                                   | Cluster0005_High in NALT |
| 1421638_at     | Psg17         | pregnancy specific glycoprotein 17                                           | Cluster0005_High in NALT |
| 1424556_at     | Pycr1         | pyrroline-5-carboxylate reductase 1                                          | Cluster0005_High in NALT |
| 1420831_at     | Qsox1         | quiescin Q6 sulfhydryl oxidase 1                                             | Cluster0005_High in NALT |
| 1420832_at     | Qsox1         | quiescin Q6 sulfhydryl oxidase 1                                             | Cluster0005_High in NALT |
| 1435500_at     | Rab26         | RAB26, member RAS oncogene family                                            | Cluster0005_High in NALT |
| 1443764_x_at   | Rab27b        | RAB27b, member RAS oncogene family                                           | Cluster0005_High in NALT |
| 1459980_x_at   | Rab3a         | RAB3A, member RAS oncogene family                                            | Cluster0005_High in NALT |
| 1418890_a_at   | Rab3d         | RAB3D, member RAS oncogene family                                            | Cluster0005_High in NALT |
| 1454752_at     | Rbm24         | RNA binding motif protein 24                                                 | Cluster0005_High in NALT |
| 1448975_s_at   | Ren1 /// Ren2 | renin 1 structural /// renin 2 tandem duplication of Ren1                    | Cluster0005_High in NALT |
| 1450280_a_at   | Rrh           | retinal pigment epithelium derived rhodopsin homolog                         | Cluster0005_High in NALT |
| 1417643_at     | Rsph1         | radial spoke head 1 homolog (Chlamydomonas)                                  | Cluster0005_High in NALT |
| 1445576_at     | Rsph10b2      | radial spoke head 10 homolog B (Chlamydomonas)                               | Cluster0005_High in NALT |
| 1444270_at     | Rsph4a        | radial spoke head 4 homolog A (Chlamydomonas)                                | Cluster0005_High in NALT |
| 1431601_at     | Rtdr1         | rhabdoid tumor deletion region gene 1                                        | Cluster0005_High in NALT |
| 1460698_a_at   | Sec11c        | SEC11 homolog C (S. cerevisiae)                                              | Cluster0005_High in NALT |
| 1434986_a_at   | Sec61a1       | Sec61 alpha 1 subunit (S. cerevisiae)                                        | Cluster0005_High in NALT |
| 1448242_at     | Sec61a1       | Sec61 alpha 1 subunit (S. cerevisiae)                                        | Cluster0005_High in NALT |
| 1449451_at     | Serpinh11     | serine (or cysteine) peptidase inhibitor, clade B (ovalbumin), member 11     | Cluster0005_High in NALT |
| 1426318_at     | Serpinh1b     | serine (or cysteine) peptidase inhibitor, clade B, member 1b                 | Cluster0005_High in NALT |
| 1420378_at     | Sftpd         | surfactant associated protein D                                              | Cluster0005_High in NALT |
| 1424730_a_at   | Slc15a2       | solute carrier family 15 (H+/peptide transporter), member 2                  | Cluster0005_High in NALT |



|              |          |                                                                                             |                          |
|--------------|----------|---------------------------------------------------------------------------------------------|--------------------------|
| 1447808_s_at | Slc15a2  | solute carrier family 15 (H+/peptide transporter), member 2                                 | Cluster0005_High in NALT |
| 1435206_at   | Slc24a4  | solute carrier family 24 (sodium/potassium/calcium exchanger), member 4                     | Cluster0005_High in NALT |
| 1434996_at   | Slc25a16 | solute carrier family 25 (mitochondrial carrier, Graves disease autoantigen), member 16     | Cluster0005_High in NALT |
| 1423980_at   | Slc25a29 | solute carrier family 25 (mitochondrial carrier, palmitoylcarnitine transporter), member 29 | Cluster0005_High in NALT |
| 1423981_x_at | Slc25a29 | solute carrier family 25 (mitochondrial carrier, palmitoylcarnitine transporter), member 29 | Cluster0005_High in NALT |
| 1443163_at   | Slc39a2  | solute carrier family 39 (zinc transporter), member 2                                       | Cluster0005_High in NALT |
| 1449203_at   | Slco1a5  | solute carrier organic anion transporter family, member 1a5                                 | Cluster0005_High in NALT |
| 1420492_s_at | Smr3a    | submaxillary gland androgen regulated protein 3A                                            | Cluster0005_High in NALT |
| 1421455_at   | Sntb1    | syntrophin, basic 1                                                                         | Cluster0005_High in NALT |
| 1451938_a_at | Sntb1    | syntrophin, basic 1                                                                         | Cluster0005_High in NALT |
| 1451689_a_at | Sox10    | SRY-box containing gene 10                                                                  | Cluster0005_High in NALT |
| 1440519_at   | Sp8      | trans-acting transcription factor 8                                                         | Cluster0005_High in NALT |
| 1417635_at   | Spa17    | sperm autoantigenic protein 17                                                              | Cluster0005_High in NALT |
| 1441708_at   | Spag16   | sperm associated antigen 16                                                                 | Cluster0005_High in NALT |
| 1417528_at   | Spag6    | sperm associated antigen 6                                                                  | Cluster0005_High in NALT |
| 1435997_at   | Spag8    | sperm associated antigen 8                                                                  | Cluster0005_High in NALT |
| 1429580_x_at | Spat24   | spermatogenesis associated 24                                                               | Cluster0005_High in NALT |
| 1439492_at   | Sptlc3   | serine palmitoyltransferase, long chain base subunit 3                                      | Cluster0005_High in NALT |
| 1423670_a_at | Sprp     | signal recognition particle receptor ( docking protein )                                    | Cluster0005_High in NALT |
| 1452892_at   | Stk33    | serine/threonine kinase 33                                                                  | Cluster0005_High in NALT |
| 1420359_at   | Sva      | seminal vesicle antigen                                                                     | Cluster0005_High in NALT |
| 1450809_at   | Sva12    | seminal vesicle antigen-like 2                                                              | Cluster0005_High in NALT |
| 1457352_x_at | Svopl    | SV2 related protein homolog (rat)-like                                                      | Cluster0005_High in NALT |
| 1418548_at   | Svs6     | seminal vesicle secretory protein 6                                                         | Cluster0005_High in NALT |
| 1429956_at   | Tbata    | thymus, brain and testes associated                                                         | Cluster0005_High in NALT |
| 1439634_at   | Tbc1d30  | TBC1 domain family, member 30                                                               | Cluster0005_High in NALT |
| 1436653_at   | Tctex1d4 | Tctex1 domain containing 4                                                                  | Cluster0005_High in NALT |
| 1432075_a_at | Tekt1    | tektin 1                                                                                    | Cluster0005_High in NALT |
| 1453121_at   | Tekt4    | tektin 4                                                                                    | Cluster0005_High in NALT |
| 1420719_at   | Tex15    | testis expressed gene 15                                                                    | Cluster0005_High in NALT |
| 1430142_at   | Tgm5     | transglutaminase 5                                                                          | Cluster0005_High in NALT |
| 1453801_at   | Them5    | thioesterase superfamily member 5                                                           | Cluster0005_High in NALT |
| 1418765_at   | Timd2    | T-cell immunoglobulin and mucin domain containing 2                                         | Cluster0005_High in NALT |
| 1436111_at   | Tmem212  | transmembrane protein 212                                                                   | Cluster0005_High in NALT |
| 1439575_at   | Tmem232  | transmembrane protein 232                                                                   | Cluster0005_High in NALT |
| 1427477_at   | Tmprss13 | transmembrane protease, serine 13                                                           | Cluster0005_High in NALT |
| 1418412_at   | Tpd52l1  | tumor protein D52-like 1                                                                    | Cluster0005_High in NALT |
| 1428093_at   | Trabd    | TraB domain containing                                                                      | Cluster0005_High in NALT |
| 1427018_at   | Tsnaxip1 | translin-associated factor X (Tsnax) interacting protein 1                                  | Cluster0005_High in NALT |
| 1454604_s_at | Tspan12  | tetraspanin 12                                                                              | Cluster0005_High in NALT |
| 1441218_at   | Ttc21a   | Tetratricopeptide repeat domain 21A                                                         | Cluster0005_High in NALT |
| 1442472_at   | Ttc21a   | Tetratricopeptide repeat domain 21A                                                         | Cluster0005_High in NALT |
| 1429130_at   | Ttc25    | tetratricopeptide repeat domain 25                                                          | Cluster0005_High in NALT |
| 1437096_at   | Ttc29    | tetratricopeptide repeat domain 29                                                          | Cluster0005_High in NALT |
| 1426007_a_at | Ubxn10   | UBX domain protein 10                                                                       | Cluster0005_High in NALT |
| 1451906_at   | Ubxn10   | UBX domain protein 10                                                                       | Cluster0005_High in NALT |
| 1447881_x_at | Usp15    | ubiquitin specific peptidase 15                                                             | Cluster0005_High in NALT |
| 1429552_at   | Wdr16    | WD repeat domain 16                                                                         | Cluster0005_High in NALT |
| 1432217_a_at | Wdr16    | WD repeat domain 16                                                                         | Cluster0005_High in NALT |
| 1436675_at   | Wdr63    | WD repeat domain 63                                                                         | Cluster0005_High in NALT |
| 1429808_at   | Wdr65    | WD repeat domain 65                                                                         | Cluster0005_High in NALT |
| 1430112_at   | Wdr66    | WD repeat domain 66                                                                         | Cluster0005_High in NALT |
| 1434144_s_at | Wdyhv1   | WDYHV motif containing 1                                                                    | Cluster0005_High in NALT |
| 1436751_at   | Wee2     | WEE1 homolog 2 (S. pombe)                                                                   | Cluster0005_High in NALT |
| 1449191_at   | Wfdc12   | WAP four-disulfide core domain 12                                                           | Cluster0005_High in NALT |
| 1436485_s_at | Whrn     | whirlin                                                                                     | Cluster0005_High in NALT |
| 1447809_x_at | Zfp420   | zinc finger protein 420                                                                     | Cluster0005_High in NALT |

|              |                        |                                                                                                              |                                      |
|--------------|------------------------|--------------------------------------------------------------------------------------------------------------|--------------------------------------|
| 1451059_at   | Zfp474                 | zinc finger protein 474                                                                                      | Cluster0005_High in NALT             |
| 1422750_a_at | Zmynd10                | zinc finger, MYND domain containing 10                                                                       | Cluster0005_High in NALT             |
| 1459815_at   | Zmynd12                | zinc finger, MYND domain containing 12                                                                       | Cluster0005_High in NALT             |
| 1450425_a_at | 2700062C07Rik          | RIKEN cDNA 2700062C07 gene                                                                                   | Cluster0006_House keeping-cell cycle |
| 1451377_a_at | Aaas                   | achalasia, adrenocortical insufficiency, alacrimia                                                           | Cluster0006_House keeping-cell cycle |
| 1428757_at   | Aasdhppt               | aminoadipate-semialdehyde dehydrogenase-phosphopantetheinyl transferase                                      | Cluster0006_House keeping-cell cycle |
| 1416014_at   | Abce1                  | ATP-binding cassette, sub-family E (OABP), member 1                                                          | Cluster0006_House keeping-cell cycle |
| 1416015_s_at | Abce1                  | ATP-binding cassette, sub-family E (OABP), member 1                                                          | Cluster0006_House keeping-cell cycle |
| 1451262_a_at | Aimp2                  | aminoacyl tRNA synthetase complex-interacting multifunctional protein 2                                      | Cluster0006_House keeping-cell cycle |
| 1416835_s_at | Amd1                   | S-adenosylmethionine decarboxylase 1                                                                         | Cluster0006_House keeping-cell cycle |
| 1430971_a_at | Aqr                    | aquarius                                                                                                     | Cluster0006_House keeping-cell cycle |
| 1452448_at   | Aqr                    | aquarius                                                                                                     | Cluster0006_House keeping-cell cycle |
| 1430571_s_at | Armc6                  | armadillo repeat containing 6                                                                                | Cluster0006_House keeping-cell cycle |
| 1418292_at   | Asna1                  | arsA arsenite transporter, ATP-binding, homolog 1 (bacterial)                                                | Cluster0006_House keeping-cell cycle |
| 1428506_at   | Atic                   | 5-aminoimidazole-4-carboxamide ribonucleotide formyltransferase/IMP cyclohydrolase                           | Cluster0006_House keeping-cell cycle |
| 1452811_at   | Atic                   | 5-aminoimidazole-4-carboxamide ribonucleotide formyltransferase/IMP cyclohydrolase                           | Cluster0006_House keeping-cell cycle |
| 1421081_a_at | Banf1                  | barrier to autointegration factor 1                                                                          | Cluster0006_House keeping-cell cycle |
| 1421082_s_at | Banf1                  | barrier to autointegration factor 1                                                                          | Cluster0006_House keeping-cell cycle |
| 1421083_x_at | Banf1                  | barrier to autointegration factor 1                                                                          | Cluster0006_House keeping-cell cycle |
| 1418234_s_at | Bcas2                  | breast carcinoma amplified sequence 2                                                                        | Cluster0006_House keeping-cell cycle |
| 1436023_at   | Bclaf1                 | BCL2-associated transcription factor 1                                                                       | Cluster0006_House keeping-cell cycle |
| 1433636_at   | Bms1                   | BMS1 homolog, ribosome assembly protein (yeast)                                                              | Cluster0006_House keeping-cell cycle |
| 1423264_at   | Bop1                   | block of proliferation 1                                                                                     | Cluster0006_House keeping-cell cycle |
| 1429561_at   | Brf2                   | BRF2, subunit of RNA polymerase III transcription initiation factor, BRF1-like                               | Cluster0006_House keeping-cell cycle |
| 1428648_at   | Cand1                  | cullin associated and neddylation disassociated 1                                                            | Cluster0006_House keeping-cell cycle |
| 1455751_at   | Cand1                  | cullin associated and neddylation disassociated 1                                                            | Cluster0006_House keeping-cell cycle |
| 1424465_at   | Ccdc58                 | coiled-coil domain containing 58                                                                             | Cluster0006_House keeping-cell cycle |
| 1416037_a_at | Cct2                   | chaperonin containing Tcp1, subunit 2 (beta)                                                                 | Cluster0006_House keeping-cell cycle |
| 1449645_s_at | Cct3                   | chaperonin containing Tcp1, subunit 3 (gamma)                                                                | Cluster0006_House keeping-cell cycle |
| 1415867_at   | Cct4                   | chaperonin containing Tcp1, subunit 4 (delta)                                                                | Cluster0006_House keeping-cell cycle |
| 1423517_at   | Cct6a                  | chaperonin containing Tcp1, subunit 6a (zeta)                                                                | Cluster0006_House keeping-cell cycle |
| 1455988_a_at | Cct6a                  | chaperonin containing Tcp1, subunit 6a (zeta)                                                                | Cluster0006_House keeping-cell cycle |
| 1415785_a_at | Cct8                   | chaperonin containing Tcp1, subunit 8 (theta)                                                                | Cluster0006_House keeping-cell cycle |
| 1434879_at   | Cdc34 /// LOC100046898 | cell division cycle 34 homolog (S. cerevisiae) /// similar to Cell division cycle 34 homolog (S. cerevisiae) | Cluster0006_House keeping-cell cycle |
| 1425932_a_at | Celf1                  | CUGBP, Elav-like family member 1                                                                             | Cluster0006_House keeping-cell cycle |
| 1448441_at   | Cks1b                  | CDC28 protein kinase 1b                                                                                      | Cluster0006_House keeping-cell cycle |
| 1427548_a_at | Clns1a                 | chloride channel, nucleotide-sensitive, 1A                                                                   | Cluster0006_House keeping-cell cycle |
| 1454168_a_at | Clpb                   | ClpB caseinolytic peptidase B homolog (E. coli)                                                              | Cluster0006_House keeping-cell cycle |
| 1416615_at   | Clpp                   | caseinolytic peptidase, ATP-dependent, proteolytic subunit homolog (E. coli)                                 | Cluster0006_House keeping-cell cycle |
| 1417117_at   | Cstf1                  | cleavage stimulation factor, 3 pre-RNA, subunit 1                                                            | Cluster0006_House keeping-cell cycle |
| 1452722_a_at | Cul5                   | cullin 5                                                                                                     | Cluster0006_House keeping-cell cycle |
| 1431005_at   | D10Wsu102e             | DNA segment, Chr 10, Wayne State University 102, expressed                                                   | Cluster0006_House keeping-cell cycle |
| 1428533_at   | D1Bwg0212e             | DNA segment, Chr 1, Brigham & Women s Genetics 0212 expressed                                                | Cluster0006_House keeping-cell cycle |
| 1419275_at   | Dazap1                 | DAZ associated protein 1                                                                                     | Cluster0006_House keeping-cell cycle |
| 1455563_at   | Ddx49                  | DEAD (Asp-Glu-Ala-Asp) box polypeptide 49                                                                    | Cluster0006_House keeping-cell cycle |
| 1423815_at   | Ddx56                  | DEAD (Asp-Glu-Ala-Asp) box polypeptide 56                                                                    | Cluster0006_House keeping-cell cycle |
| 1425617_at   | Dhx9                   | DEAH (Asp-Glu-Ala-His) box polypeptide 9                                                                     | Cluster0006_House keeping-cell cycle |
| 1417322_at   | Dohh                   | deoxyhypusine hydroxylase/monooxygenase                                                                      | Cluster0006_House keeping-cell cycle |
| 1448336_at   | Drg1                   | developmentally regulated GTP binding protein 1                                                              | Cluster0006_House keeping-cell cycle |
| 1449116_a_at | Dtymk                  | deoxythymidylate kinase                                                                                      | Cluster0006_House keeping-cell cycle |
| 1433886_at   | Eif2b5                 | eukaryotic translation initiation factor 2B, subunit 5 epsilon                                               | Cluster0006_House keeping-cell cycle |
| 1416659_at   | Eif3a                  | eukaryotic translation initiation factor 3, subunit A                                                        | Cluster0006_House keeping-cell cycle |
| 1416660_at   | Eif3a                  | eukaryotic translation initiation factor 3, subunit A                                                        | Cluster0006_House keeping-cell cycle |
| 1426674_at   | Eif3b                  | eukaryotic translation initiation factor 3, subunit B                                                        | Cluster0006_House keeping-cell cycle |
| 1426394_at   | Eif3j                  | eukaryotic translation initiation factor 3, subunit J                                                        | Cluster0006_House keeping-cell cycle |
| 1423728_at   | Eif3l                  | eukaryotic translation initiation factor 3, subunit L                                                        | Cluster0006_House keeping-cell cycle |
| 1434985_a_at | Eif4a1                 | eukaryotic translation initiation factor 4A1                                                                 | Cluster0006_House keeping-cell cycle |

|              |                               |                                                                                                                                                    |                                      |
|--------------|-------------------------------|----------------------------------------------------------------------------------------------------------------------------------------------------|--------------------------------------|
| 1450908_at   | Eif4e                         | eukaryotic translation initiation factor 4E                                                                                                        | Cluster0006_House keeping-cell cycle |
| 1437859_x_at | Eif5a                         | eukaryotic translation initiation factor 5A                                                                                                        | Cluster0006_House keeping-cell cycle |
| 1451470_s_at | Eif5a                         | eukaryotic translation initiation factor 5A                                                                                                        | Cluster0006_House keeping-cell cycle |
| 1416393_at   | Emg1                          | EMG1 nucleolar protein homolog (S. cerevisiae)                                                                                                     | Cluster0006_House keeping-cell cycle |
| 1430536_a_at | Erh                           | enhancer of rudimentary homolog (Drosophila)                                                                                                       | Cluster0006_House keeping-cell cycle |
| 1453727_at   | Esf1                          | ESF1, nucleolar pre-rRNA processing protein, homolog (S. cerevisiae)                                                                               | Cluster0006_House keeping-cell cycle |
| 1424013_at   | Etf1                          | eukaryotic translation termination factor 1                                                                                                        | Cluster0006_House keeping-cell cycle |
| 1451208_at   | Etf1                          | eukaryotic translation termination factor 1                                                                                                        | Cluster0006_House keeping-cell cycle |
| 1426630_at   | Exosc2                        | exosome component 2                                                                                                                                | Cluster0006_House keeping-cell cycle |
| 1433482_a_at | Fubp1                         | far upstream element (FUSE) binding protein 1                                                                                                      | Cluster0006_House keeping-cell cycle |
| 1452247_at   | Fxr1                          | fragile X mental retardation gene 1, autosomal homolog                                                                                             | Cluster0006_House keeping-cell cycle |
| 1452881_at   | Gins2                         | GIN5 complex subunit 2 (Psf2 homolog)                                                                                                              | Cluster0006_House keeping-cell cycle |
| 1452033_at   | Gle1                          | GLE1 RNA export mediator (yeast)                                                                                                                   | Cluster0006_House keeping-cell cycle |
| 1431054_at   | Gm10043 /// Gm2926 /// Lsm6   | LSM6 homolog, U6 small nuclear RNA associated pseudogene /// LSM6 homolog, U6 small nuclear RNA associated pseudogene                              | Cluster0006_House keeping-cell cycle |
| 1418274_at   | Gm10333 /// Gm10349 /// Nutf2 | nuclear transport factor 2, pseudogene 1 /// predicted pseudogene 10349 /// nuclear transport factor 2                                             | Cluster0006_House keeping-cell cycle |
| 1439553_s_at | Gm10333 /// Gm10349 /// Nutf2 | nuclear transport factor 2, pseudogene 1 /// predicted pseudogene 10349 /// nuclear transport factor 2                                             | Cluster0006_House keeping-cell cycle |
| 1423382_a_at | Gm11793 /// Hnrnpf            | predicted gene 11793 /// heterogeneous nuclear ribonucleoprotein F                                                                                 | Cluster0006_House keeping-cell cycle |
| 1420476_a_at | Gm4204 /// Nap11              | predicted gene 4204 /// nucleosome assembly protein 1-like 1                                                                                       | Cluster0006_House keeping-cell cycle |
| 1456626_a_at | Gm6563 /// Sarnp              | SAP domain containing ribonucleoprotein pseudogene /// SAP domain containing ribonucleoprotein                                                     | Cluster0006_House keeping-cell cycle |
| 1423455_at   | Gm9800 /// Ptma               | predicted gene 9800 /// prothymosin alpha                                                                                                          | Cluster0006_House keeping-cell cycle |
| 1433567_at   | Gmps                          | guanine monophosphate synthetase                                                                                                                   | Cluster0006_House keeping-cell cycle |
| 1426736_at   | Gspt1                         | G1 to S phase transition 1                                                                                                                         | Cluster0006_House keeping-cell cycle |
| 1452168_x_at | Gspt1                         | G1 to S phase transition 1                                                                                                                         | Cluster0006_House keeping-cell cycle |
| 1448585_at   | Gtf2h4                        | general transcription factor II H, polypeptide 4                                                                                                   | Cluster0006_House keeping-cell cycle |
| 1426187_a_at | Hax1                          | HCLS1 associated X-1                                                                                                                               | Cluster0006_House keeping-cell cycle |
| 1415888_at   | Hdgf                          | hepatoma-derived growth factor                                                                                                                     | Cluster0006_House keeping-cell cycle |
| 1453849_s_at | Hnrnpab                       | heterogeneous nuclear ribonucleoprotein A/B                                                                                                        | Cluster0006_House keeping-cell cycle |
| 1450963_at   | Hnrnpf                        | heterogeneous nuclear ribonucleoprotein F                                                                                                          | Cluster0006_House keeping-cell cycle |
| 1450849_at   | Hnrnpu                        | heterogeneous nuclear ribonucleoprotein U                                                                                                          | Cluster0006_House keeping-cell cycle |
| 1416365_at   | Hsp90ab1                      | heat shock protein 90 alpha (cytosolic), class B member 1                                                                                          | Cluster0006_House keeping-cell cycle |
| 1418504_at   | Hspa9                         | heat shock protein 9                                                                                                                               | Cluster0006_House keeping-cell cycle |
| 1422579_at   | Hspe1                         | heat shock protein 1 (chaperonin 10)                                                                                                               | Cluster0006_House keeping-cell cycle |
| 1417949_at   | Ilf2                          | interleukin enhancer binding factor 2                                                                                                              | Cluster0006_House keeping-cell cycle |
| 1426945_at   | Ipo5                          | importin 5                                                                                                                                         | Cluster0006_House keeping-cell cycle |
| 1454955_at   | Ipo7                          | importin 7                                                                                                                                         | Cluster0006_House keeping-cell cycle |
| 1416925_at   | Kpnb1                         | karyopherin (importin) beta 1                                                                                                                      | Cluster0006_House keeping-cell cycle |
| 1452658_at   | Krr1                          | KRR1, small subunit (SSU) processome component, homolog (yeast)                                                                                    | Cluster0006_House keeping-cell cycle |
| 1425865_a_at | Lig3                          | ligase III, DNA, ATP-dependent                                                                                                                     | Cluster0006_House keeping-cell cycle |
| 1426040_a_at | LOC100047199 /// Odf2         | similar to outer dense fiber of sperm tails 2 /// outer dense fiber of sperm tails 2                                                               | Cluster0006_House keeping-cell cycle |
| 1425373_a_at | LOC100047604 /// Psmg2        | similar to Clast3 protein /// proteasome (prosome, macropain) assembly chaperone 2                                                                 | Cluster0006_House keeping-cell cycle |
| 1430982_at   | LOC100048559 /// Sfrs1        | similar to splicing factor, arginine/serine-rich 1 (splicing factor 2, alternate splicing factor) /// splicing factor 2, alternate splicing factor | Cluster0006_House keeping-cell cycle |
| 1437630_at   | Lsg1                          | large subunit GTPase 1 homolog (S. cerevisiae)                                                                                                     | Cluster0006_House keeping-cell cycle |
| 1451884_a_at | Lsm2                          | LSM2 homolog, U6 small nuclear RNA associated (S. cerevisiae)                                                                                      | Cluster0006_House keeping-cell cycle |
| 1426813_at   | Ltv1                          | LTV1 homolog (S. cerevisiae)                                                                                                                       | Cluster0006_House keeping-cell cycle |
| 1416212_at   | Magoh                         | mago-nashi homolog, proliferation-associated (Drosophila)                                                                                          | Cluster0006_House keeping-cell cycle |
| 1417728_at   | Mbd3                          | methyl-CpG binding domain protein 3                                                                                                                | Cluster0006_House keeping-cell cycle |
| 1439115_at   | Mcph1                         | microcephaly, primary autosomal recessive 1                                                                                                        | Cluster0006_House keeping-cell cycle |
| 1452395_at   | Med19                         | mediator of RNA polymerase II transcription, subunit 19 homolog (yeast)                                                                            | Cluster0006_House keeping-cell cycle |
| 1426837_at   | Metap1                        | methionyl aminopeptidase 1                                                                                                                         | Cluster0006_House keeping-cell cycle |
| 1432177_a_at | Mnat1                         | menage a trois 1                                                                                                                                   | Cluster0006_House keeping-cell cycle |
| 1417918_at   | Mrpl11                        | mitochondrial ribosomal protein L11                                                                                                                | Cluster0006_House keeping-cell cycle |
| 1424204_at   | Mrpl13                        | mitochondrial ribosomal protein L13                                                                                                                | Cluster0006_House keeping-cell cycle |
| 1435995_at   | Mrpl22                        | mitochondrial ribosomal protein L22                                                                                                                | Cluster0006_House keeping-cell cycle |
| 1416284_at   | Mrpl28                        | mitochondrial ribosomal protein L28                                                                                                                | Cluster0006_House keeping-cell cycle |
| 1423219_a_at | Mrpl49                        | mitochondrial ribosomal protein L49                                                                                                                | Cluster0006_House keeping-cell cycle |
| 1428153_at   | Mrps10                        | mitochondrial ribosomal protein S10                                                                                                                | Cluster0006_House keeping-cell cycle |
| 1420845_at   | Mrps2                         | mitochondrial ribosomal protein S2                                                                                                                 | Cluster0006_House keeping-cell cycle |

|              |         |                                                                  |                                      |
|--------------|---------|------------------------------------------------------------------|--------------------------------------|
| 1421874_a_at | Mrps23  | mitochondrial ribosomal protein S23                              | Cluster0006_House keeping-cell cycle |
| 1453725_a_at | Mrps7   | mitochondrial ribosomal protein S7                               | Cluster0006_House keeping-cell cycle |
| 1418522_at   | Mtx1    | metaxin 1                                                        | Cluster0006_House keeping-cell cycle |
| 1423430_at   | Mybbp1a | MYB binding protein (P160) 1a                                    | Cluster0006_House keeping-cell cycle |
| 1435139_at   | Naa15   | N(alpha)-acetyltransferase 15, NatA auxiliary subunit            | Cluster0006_House keeping-cell cycle |
| 1420478_at   | Nap11   | nucleosome assembly protein 1-like 1                             | Cluster0006_House keeping-cell cycle |
| 1420479_a_at | Nap11   | nucleosome assembly protein 1-like 1                             | Cluster0006_House keeping-cell cycle |
| 1429227_x_at | Nap11   | nucleosome assembly protein 1-like 1                             | Cluster0006_House keeping-cell cycle |
| 1415771_at   | Ncl     | nucleolin                                                        | Cluster0006_House keeping-cell cycle |
| 1415773_at   | Ncl     | nucleolin                                                        | Cluster0006_House keeping-cell cycle |
| 1427639_a_at | Nek4    | NIMA (never in mitosis gene a)-related expressed kinase 4        | Cluster0006_House keeping-cell cycle |
| 1416605_at   | Nhp2    | NHP2 ribonucleoprotein homolog (yeast)                           | Cluster0006_House keeping-cell cycle |
| 1416973_at   | Nhp21   | NHP2 non-histone chromosome protein 2-like 1 (S. cerevisiae)     | Cluster0006_House keeping-cell cycle |
| 1423479_at   | Nol1    | nucleolar protein 11                                             | Cluster0006_House keeping-cell cycle |
| 1451010_at   | Nol1    | nucleolar protein 11                                             | Cluster0006_House keeping-cell cycle |
| 1432218_a_at | Nol9    | nucleolar protein 9                                              | Cluster0006_House keeping-cell cycle |
| 1453114_at   | Nol9    | nucleolar protein 9                                              | Cluster0006_House keeping-cell cycle |
| 1424620_at   | Nop16   | NOP16 nucleolar protein homolog (yeast)                          | Cluster0006_House keeping-cell cycle |
| 1454804_at   | Nploc4  | nuclear protein localization 4 homolog (S. cerevisiae)           | Cluster0006_House keeping-cell cycle |
| 1432416_a_at | Npm1    | nucleophosmin 1                                                  | Cluster0006_House keeping-cell cycle |
| 1447924_at   | Nucks1  | nuclear casein kinase and cyclin-dependent kinase substrate 1    | Cluster0006_House keeping-cell cycle |
| 1429655_at   | Nudcd1  | NudC domain containing 1                                         | Cluster0006_House keeping-cell cycle |
| 1417681_at   | Nudt21  | nudix (nucleoside diphosphate linked moiety X)-type motif 21     | Cluster0006_House keeping-cell cycle |
| 1451111_at   | Nup133  | nucleoporin 133                                                  | Cluster0006_House keeping-cell cycle |
| 1426447_at   | Nup35   | nucleoporin 35                                                   | Cluster0006_House keeping-cell cycle |
| 1450722_at   | Nup50   | nucleoporin 50                                                   | Cluster0006_House keeping-cell cycle |
| 1430053_a_at | Ola1    | Obg-like ATPase 1                                                | Cluster0006_House keeping-cell cycle |
| 1434469_at   | Otud4   | OTU domain containing 4                                          | Cluster0006_House keeping-cell cycle |
| 1454120_a_at | Pcgf6   | polycomb group ring finger 6                                     | Cluster0006_House keeping-cell cycle |
| 1428080_at   | Pgam5   | phosphoglycerate mutase family member 5                          | Cluster0006_House keeping-cell cycle |
| 1417053_at   | Phb     | prohibitin                                                       | Cluster0006_House keeping-cell cycle |
| 1429707_at   | Plaa    | phospholipase A2, activating protein                             | Cluster0006_House keeping-cell cycle |
| 1416707_a_at | Pmf1    | polyamine-modulated factor 1                                     | Cluster0006_House keeping-cell cycle |
| 1424661_at   | Pmpca   | peptidase (mitochondrial processing) alpha                       | Cluster0006_House keeping-cell cycle |
| 1423325_at   | Pnn     | pinin                                                            | Cluster0006_House keeping-cell cycle |
| 1450735_at   | Pno1    | partner of NOB1 homolog (S. cerevisiae)                          | Cluster0006_House keeping-cell cycle |
| 1451120_at   | Polr1d  | polymerase (RNA) I polypeptide D                                 | Cluster0006_House keeping-cell cycle |
| 1424258_at   | Polr2d  | polymerase (RNA) II (DNA directed) polypeptide D                 | Cluster0006_House keeping-cell cycle |
| 1435766_at   | Pphln1  | periphilin 1                                                     | Cluster0006_House keeping-cell cycle |
| 1424554_at   | Ppp1r8  | protein phosphatase 1, regulatory (inhibitor) subunit 8          | Cluster0006_House keeping-cell cycle |
| 1422796_at   | Prep    | prolyl endopeptidase                                             | Cluster0006_House keeping-cell cycle |
| 1452787_a_at | Prmt1   | protein arginine N-methyltransferase 1                           | Cluster0006_House keeping-cell cycle |
| 1460633_at   | Prpf19  | PRP19/PSO4 pre-mRNA processing factor 19 homolog (S. cerevisiae) | Cluster0006_House keeping-cell cycle |
| 1423567_a_at | Psma7   | proteasome (prosome, macropain) subunit, alpha type 7            | Cluster0006_House keeping-cell cycle |
| 1423568_at   | Psma7   | proteasome (prosome, macropain) subunit, alpha type 7            | Cluster0006_House keeping-cell cycle |
| 1417052_at   | Psmb3   | proteasome (prosome, macropain) subunit, beta type 3             | Cluster0006_House keeping-cell cycle |
| 1416240_at   | Psmb7   | proteasome (prosome, macropain) subunit, beta type 7             | Cluster0006_House keeping-cell cycle |
| 1429370_a_at | Psmd11  | proteasome (prosome, macropain) 26S subunit, non-ATPase, 11      | Cluster0006_House keeping-cell cycle |
| 1448492_a_at | Psmd12  | proteasome (prosome, macropain) 26S subunit, non-ATPase, 12      | Cluster0006_House keeping-cell cycle |
| 1418874_a_at | Psmd4   | proteasome (prosome, macropain) 26S subunit, non-ATPase, 4       | Cluster0006_House keeping-cell cycle |
| 1425859_a_at | Psmd4   | proteasome (prosome, macropain) 26S subunit, non-ATPase, 4       | Cluster0006_House keeping-cell cycle |
| 1426824_at   | Psme4   | proteasome (prosome, macropain) activator subunit 4              | Cluster0006_House keeping-cell cycle |
| 1424874_a_at | Ptbp1   | polypyrimidine tract binding protein 1                           | Cluster0006_House keeping-cell cycle |
| 1460221_at   | Ptges3  | prostaglandin E synthase 3 (cytosolic)                           | Cluster0006_House keeping-cell cycle |
| 1452075_at   | Pus10   | pseudouridylylase 10                                             | Cluster0006_House keeping-cell cycle |
| 1454142_a_at | Pwp1    | PWP1 homolog (S. cerevisiae)                                     | Cluster0006_House keeping-cell cycle |
| 1421320_a_at | Qtrtd1  | queuine tRNA-ribosyltransferase domain containing 1              | Cluster0006_House keeping-cell cycle |

|              |                   |                                                                |                                      |
|--------------|-------------------|----------------------------------------------------------------|--------------------------------------|
| 1448414_at   | Rad1              | RAD1 homolog ( <i>S. pombe</i> )                               | Cluster0006_House keeping-cell cycle |
| 1416162_at   | Rad21             | RAD21 homolog ( <i>S. pombe</i> )                              | Cluster0006_House keeping-cell cycle |
| 1424222_s_at | Rad23b            | RAD23b homolog ( <i>S. cerevisiae</i> )                        | Cluster0006_House keeping-cell cycle |
| 1450903_at   | Rad23b            | RAD23b homolog ( <i>S. cerevisiae</i> )                        | Cluster0006_House keeping-cell cycle |
| 1429528_at   | Rae1              | RAE1 RNA export 1 homolog ( <i>S. pombe</i> )                  | Cluster0006_House keeping-cell cycle |
| 1460551_at   | Ran               | RAN, member RAS oncogene family                                | Cluster0006_House keeping-cell cycle |
| 1422547_at   | Ranbp1            | RAN binding protein 1                                          | Cluster0006_House keeping-cell cycle |
| 1425523_at   | Rbm25             | RNA binding motif protein 25                                   | Cluster0006_House keeping-cell cycle |
| 1422993_s_at | Refbp2 /// Thoc4  | RNA and export factor binding protein 2 /// THO complex 4      | Cluster0006_House keeping-cell cycle |
| 1423700_at   | Rfc3              | replication factor C (activator 1) 3                           | Cluster0006_House keeping-cell cycle |
| 1432538_a_at | Rfc3              | replication factor C (activator 1) 3                           | Cluster0006_House keeping-cell cycle |
| 1423654_a_at | Rnf4              | ring finger protein 4                                          | Cluster0006_House keeping-cell cycle |
| 1448324_at   | Rnps1             | ribonucleic acid binding protein S1                            | Cluster0006_House keeping-cell cycle |
| 1431784_a_at | Rpf1              | ribosome production factor 1 homolog ( <i>S. cerevisiae</i> )  | Cluster0006_House keeping-cell cycle |
| 1416807_at   | Rpl36a            | ribosomal protein L36A                                         | Cluster0006_House keeping-cell cycle |
| 1451631_at   | Rprd1a            | regulation of nuclear pre-mRNA domain containing 1A            | Cluster0006_House keeping-cell cycle |
| 1456383_at   | Rsl1d1            | ribosomal L1 domain containing 1                               | Cluster0006_House keeping-cell cycle |
| 1417035_at   | Sac3d1            | SAC3 domain containing 1                                       | Cluster0006_House keeping-cell cycle |
| 1417548_at   | Sart3             | squamous cell carcinoma antigen recognized by T-cells 3        | Cluster0006_House keeping-cell cycle |
| 1433974_at   | Sephs1            | selenophosphate synthetase 1                                   | Cluster0006_House keeping-cell cycle |
| 1421819_a_at | Set               | SET translocation                                              | Cluster0006_House keeping-cell cycle |
| 1416670_at   | Setdb1            | SET domain, bifurcated 1                                       | Cluster0006_House keeping-cell cycle |
| 1432488_a_at | Sf3a3             | splicing factor 3a, subunit 3                                  | Cluster0006_House keeping-cell cycle |
| 1418527_a_at | Sfrs13a           | splicing factor, arginine/serine-rich 13A                      | Cluster0006_House keeping-cell cycle |
| 1415807_s_at | Sfrs2             | splicing factor, arginine/serine-rich 2 (SC-35)                | Cluster0006_House keeping-cell cycle |
| 1427504_s_at | Sfrs2             | splicing factor, arginine/serine-rich 2 (SC-35)                | Cluster0006_House keeping-cell cycle |
| 1452439_s_at | Sfrs2             | splicing factor, arginine/serine-rich 2 (SC-35)                | Cluster0006_House keeping-cell cycle |
| 1416150_a_at | Sfrs3             | splicing factor, arginine/serine-rich 3 (SRp20)                | Cluster0006_House keeping-cell cycle |
| 1419404_s_at | Siah1a /// Siah1b | seven in absentia 1A /// seven in absentia 1B                  | Cluster0006_House keeping-cell cycle |
| 1449293_a_at | Skp2              | S-phase kinase-associated protein 2 (p45)                      | Cluster0006_House keeping-cell cycle |
| 1426596_a_at | Smn1              | survival motor neuron 1                                        | Cluster0006_House keeping-cell cycle |
| 1417274_at   | Snrpa             | small nuclear ribonucleoprotein polypeptide A                  | Cluster0006_House keeping-cell cycle |
| 1426613_a_at | Snrpb2            | U2 small nuclear ribonucleoprotein B                           | Cluster0006_House keeping-cell cycle |
| 1416197_at   | Snrpc             | U1 small nuclear ribonucleoprotein C                           | Cluster0006_House keeping-cell cycle |
| 1416336_s_at | Snrpd1            | small nuclear ribonucleoprotein D1                             | Cluster0006_House keeping-cell cycle |
| 1422884_at   | Snrpd3            | small nuclear ribonucleoprotein D3                             | Cluster0006_House keeping-cell cycle |
| 1448357_at   | Snrpg             | small nuclear ribonucleoprotein polypeptide G                  | Cluster0006_House keeping-cell cycle |
| 1453928_a_at | Ssb               | Sjogren syndrome antigen B                                     | Cluster0006_House keeping-cell cycle |
| 1452616_s_at | Ssbp1             | single-stranded DNA binding protein 1                          | Cluster0006_House keeping-cell cycle |
| 1416851_at   | St13              | Suppression of tumorigenicity 13                               | Cluster0006_House keeping-cell cycle |
| 1460193_at   | St13              | suppression of tumorigenicity 13                               | Cluster0006_House keeping-cell cycle |
| 1455655_a_at | Tardbp            | TAR DNA binding protein                                        | Cluster0006_House keeping-cell cycle |
| 1421033_a_at | Tcerg1            | transcription elongation regulator 1 (CA150)                   | Cluster0006_House keeping-cell cycle |
| 1450100_a_at | Tcerg1            | transcription elongation regulator 1 (CA150)                   | Cluster0006_House keeping-cell cycle |
| 1429282_at   | Thap1             | THAP domain containing, apoptosis associated protein 1         | Cluster0006_House keeping-cell cycle |
| 1417724_at   | Thoc4             | THO complex 4                                                  | Cluster0006_House keeping-cell cycle |
| 1426256_at   | Timm17a           | translocase of inner mitochondrial membrane 17a                | Cluster0006_House keeping-cell cycle |
| 1454669_at   | Tmem11            | transmembrane protein 11                                       | Cluster0006_House keeping-cell cycle |
| 1417912_at   | Tmem93            | transmembrane protein 93                                       | Cluster0006_House keeping-cell cycle |
| 1429369_at   | Tnpo3             | transportin 3                                                  | Cluster0006_House keeping-cell cycle |
| 1453124_at   | Tnpo3             | transportin 3                                                  | Cluster0006_House keeping-cell cycle |
| 1423080_at   | Tommm20           | translocase of outer mitochondrial membrane 20 homolog (yeast) | Cluster0006_House keeping-cell cycle |
| 1429103_at   | Tommm22           | translocase of outer mitochondrial membrane 22 homolog (yeast) | Cluster0006_House keeping-cell cycle |
| 1419543_a_at | Tra2b             | transformer 2 beta homolog ( <i>Drosophila</i> )               | Cluster0006_House keeping-cell cycle |
| 1437314_a_at | Trmt1             | TRM1 tRNA methyltransferase 1 homolog ( <i>S. cerevisiae</i> ) | Cluster0006_House keeping-cell cycle |
| 1426538_a_at | Trp53             | transformation related protein 53                              | Cluster0006_House keeping-cell cycle |
| 1427739_a_at | Trp53             | transformation related protein 53                              | Cluster0006_House keeping-cell cycle |

|              |                                       |                                                                                                                     |                                      |
|--------------|---------------------------------------|---------------------------------------------------------------------------------------------------------------------|--------------------------------------|
| 1452818_at   | Ttf2                                  | transcription termination factor, RNA polymerase II                                                                 | Cluster0006_House keeping-cell cycle |
| 1422509_at   | U2af1                                 | U2 small nuclear ribonucleoprotein auxiliary factor (U2AF) 1                                                        | Cluster0006_House keeping-cell cycle |
| 1428944_at   | Uba6                                  | ubiquitin-like modifier activating enzyme 6                                                                         | Cluster0006_House keeping-cell cycle |
| 1424281_at   | Ubap2                                 | ubiquitin-associated protein 2                                                                                      | Cluster0006_House keeping-cell cycle |
| 1422559_at   | Ube2n                                 | ubiquitin-conjugating enzyme E2N                                                                                    | Cluster0006_House keeping-cell cycle |
| 1423675_at   | Usp1                                  | ubiquitin specific peptidase 1                                                                                      | Cluster0006_House keeping-cell cycle |
| 1433635_at   | Wdr18                                 | WD repeat domain 18                                                                                                 | Cluster0006_House keeping-cell cycle |
| 1453554_a_at | Wdr33                                 | WD repeat domain 33                                                                                                 | Cluster0006_House keeping-cell cycle |
| 1448389_at   | Wdr5                                  | WD repeat domain 5                                                                                                  | Cluster0006_House keeping-cell cycle |
| 1430289_a_at | Wdr77                                 | WD repeat domain 77                                                                                                 | Cluster0006_House keeping-cell cycle |
| 1451468_s_at | Xpo5                                  | exportin 5                                                                                                          | Cluster0006_House keeping-cell cycle |
| 1430134_a_at | Yars2                                 | tyrosyl-tRNA synthetase 2 (mitochondrial)                                                                           | Cluster0006_House keeping-cell cycle |
| 1426384_a_at | Ywhae                                 | tyrosine 3-monooxygenase/tryptophan 5-monooxygenase activation protein, epsilon polypeptide                         | Cluster0006_House keeping-cell cycle |
| 1426385_x_at | Ywhae                                 | tyrosine 3-monooxygenase/tryptophan 5-monooxygenase activation protein, epsilon polypeptide                         | Cluster0006_House keeping-cell cycle |
| 1438839_a_at | Ywhae                                 | tyrosine 3-monooxygenase/tryptophan 5-monooxygenase activation protein, epsilon polypeptide                         | Cluster0006_House keeping-cell cycle |
| 1423545_a_at | Zfp207                                | zinc finger protein 207                                                                                             | Cluster0006_House keeping-cell cycle |
| 1430117_a_at | Zfp64                                 | zinc finger protein 64                                                                                              | Cluster0006_House keeping-cell cycle |
| 1438140_a_at | Zfp64                                 | zinc finger protein 64                                                                                              | Cluster0006_House keeping-cell cycle |
| 1419522_at   | Zmynd19                               | zinc finger, MYND domain containing 19                                                                              | Cluster0006_House keeping-cell cycle |
| 1449074_at   | 1700019N12Rik                         | RIKEN cDNA 1700019N12 gene                                                                                          | Cluster0007_High in Neuro2A cells    |
| 1430261_at   | 1700024J04Rik                         | RIKEN cDNA 1700024J04 gene                                                                                          | Cluster0007_High in Neuro2A cells    |
| 1457426_at   | 1700048O20Rik                         | RIKEN cDNA 1700048O20 gene                                                                                          | Cluster0007_High in Neuro2A cells    |
| 1430324_x_at | 1700049E17Rik1 /// 1700049E17Rik2     | RIKEN cDNA 1700049E17 gene, gene 1 /// tandem duplication of RIKEN cDNA 1700049E17 gene, gene 2                     | Cluster0007_High in Neuro2A cells    |
| 1430323_at   | 1700049E17Rik1 /// 1700049E17Rik2 /// | RIKEN cDNA 1700049E17 gene, gene 1 /// tandem duplication of RIKEN cDNA 1700049E17 gene, gene 2 ///                 | Cluster0007_High in Neuro2A cells    |
| 1442388_at   | 2410137F16Rik                         | RIKEN cDNA 2410137F16 gene                                                                                          | Cluster0007_High in Neuro2A cells    |
| 1436362_x_at | 2700079J08Rik /// Ccrn4l /// Gm4638   | RIKEN cDNA 2700079J08 gene /// CCR4 carbon catabolite repression 4-like ( <i>S. cerevisiae</i> ) /// predicted gene | Cluster0007_High in Neuro2A cells    |
| 1455947_at   |                                       | Mar-11 membrane-associated ring finger (C3HC4) 11                                                                   | Cluster0007_High in Neuro2A cells    |
| 1450793_at   | 4930550L24Rik                         | RIKEN cDNA 4930550L24 gene                                                                                          | Cluster0007_High in Neuro2A cells    |
| 1420774_a_at | 4930583H14Rik                         | RIKEN cDNA 4930583H14 gene                                                                                          | Cluster0007_High in Neuro2A cells    |
| 1430033_at   | 5330431K02Rik                         | RIKEN cDNA 5330431K02 gene                                                                                          | Cluster0007_High in Neuro2A cells    |
| 1453444_at   | 5730437C12Rik                         | RIKEN cDNA 5730437C12 gene                                                                                          | Cluster0007_High in Neuro2A cells    |
| 1429896_at   | 5830408B19Rik                         | RIKEN cDNA 5830408B19 gene                                                                                          | Cluster0007_High in Neuro2A cells    |
| 1432713_at   | 6430709C05Rik                         | RIKEN cDNA 6430709C05 gene                                                                                          | Cluster0007_High in Neuro2A cells    |
| 1444797_at   | 8030474K03Rik                         | RIKEN cDNA 8030474K03 gene                                                                                          | Cluster0007_High in Neuro2A cells    |
| 1458811_at   | 9430047L24Rik                         | RIKEN cDNA 9430047L24 gene                                                                                          | Cluster0007_High in Neuro2A cells    |
| 1431491_at   | 9430087N24Rik                         | RIKEN cDNA 9430087N24 gene                                                                                          | Cluster0007_High in Neuro2A cells    |
| 1441197_at   | 9530059O14Rik                         | RIKEN cDNA 9530059O14 gene                                                                                          | Cluster0007_High in Neuro2A cells    |
| 1457550_at   | 9530059O14Rik                         | RIKEN cDNA 9530059O14 gene                                                                                          | Cluster0007_High in Neuro2A cells    |
| 1440581_at   | A530088H08Rik                         | RIKEN cDNA A530088H08 gene                                                                                          | Cluster0007_High in Neuro2A cells    |
| 1447493_at   | A530088H08Rik                         | RIKEN cDNA A530088H08 gene                                                                                          | Cluster0007_High in Neuro2A cells    |
| 1455328_at   | Accn2                                 | amiloride-sensitive cation channel 2, neuronal                                                                      | Cluster0007_High in Neuro2A cells    |
| 1439042_at   | Adcyap1r1                             | adenylate cyclase activating polypeptide 1 receptor 1                                                               | Cluster0007_High in Neuro2A cells    |
| 1438967_x_at | Amhr2                                 | anti-Mullerian hormone type 2 receptor                                                                              | Cluster0007_High in Neuro2A cells    |
| 1457021_x_at | Amhr2                                 | anti-Mullerian hormone type 2 receptor                                                                              | Cluster0007_High in Neuro2A cells    |
| 1422402_a_at | Asz1                                  | ankyrin repeat, SAM and basic leucine zipper domain containing 1                                                    | Cluster0007_High in Neuro2A cells    |
| 1424939_at   | Asz1                                  | ankyrin repeat, SAM and basic leucine zipper domain containing 1                                                    | Cluster0007_High in Neuro2A cells    |
| 1434466_at   | Atcay                                 | ataxia, cerebellar, Cayman type homolog (human)                                                                     | Cluster0007_High in Neuro2A cells    |
| 1434467_at   | Atcay                                 | ataxia, cerebellar, Cayman type homolog (human)                                                                     | Cluster0007_High in Neuro2A cells    |
| 1430144_at   | Avl9                                  | AVL9 homolog ( <i>S. cerevisiae</i> )                                                                               | Cluster0007_High in Neuro2A cells    |
| 1424951_at   | Baiap2l1                              | BAI1-associated protein 2-like 1                                                                                    | Cluster0007_High in Neuro2A cells    |
| 1451539_at   | Baiap2l1                              | BAI1-associated protein 2-like 1                                                                                    | Cluster0007_High in Neuro2A cells    |
| 1422777_at   | C1ql1                                 | complement component 1, q subcomponent-like 1                                                                       | Cluster0007_High in Neuro2A cells    |
| 1436602_x_at | Cacna1b                               | calcium channel, voltage-dependent, N type, alpha 1B subunit                                                        | Cluster0007_High in Neuro2A cells    |
| 1439612_at   | Cacna1b                               | calcium channel, voltage-dependent, N type, alpha 1B subunit                                                        | Cluster0007_High in Neuro2A cells    |
| 1460608_at   | Cacna1b                               | calcium channel, voltage-dependent, N type, alpha 1B subunit                                                        | Cluster0007_High in Neuro2A cells    |
| 1450520_at   | Cacng3                                | calcium channel, voltage-dependent, gamma subunit 3                                                                 | Cluster0007_High in Neuro2A cells    |
| 1441965_at   | Ccdc38                                | coiled-coil domain containing 38                                                                                    | Cluster0007_High in Neuro2A cells    |

|              |                      |                                                                            |                                   |
|--------------|----------------------|----------------------------------------------------------------------------|-----------------------------------|
| 1429790_at   | Celf6                | CUGBP, Elav-like family member 6                                           | Cluster0007_High in Neuro2A cells |
| 1421348_a_at | Cend1                | cell cycle exit and neuronal differentiation 1                             | Cluster0007_High in Neuro2A cells |
| 1421349_x_at | Cend1                | cell cycle exit and neuronal differentiation 1                             | Cluster0007_High in Neuro2A cells |
| 1452010_at   | Chrna3               | cholinergic receptor, nicotinic, alpha polypeptide 3                       | Cluster0007_High in Neuro2A cells |
| 1455931_at   | Chrna3               | cholinergic receptor, nicotinic, alpha polypeptide 3                       | Cluster0007_High in Neuro2A cells |
| 1427401_at   | Chrna5               | cholinergic receptor, nicotinic, alpha polypeptide 5                       | Cluster0007_High in Neuro2A cells |
| 1422314_at   | Clcn6                | chloride channel 6                                                         | Cluster0007_High in Neuro2A cells |
| 1439427_at   | Cldn9                | claudin 9                                                                  | Cluster0007_High in Neuro2A cells |
| 1433906_at   | Clvs1                | clavesin 1                                                                 | Cluster0007_High in Neuro2A cells |
| 1459941_at   | Clvs1                | clavesin 1                                                                 | Cluster0007_High in Neuro2A cells |
| 1419425_at   | Cnr1                 | cannabinoid receptor 1 (brain)                                             | Cluster0007_High in Neuro2A cells |
| 1434172_at   | Cnr1                 | cannabinoid receptor 1 (brain)                                             | Cluster0007_High in Neuro2A cells |
| 1420739_at   | Cntn3                | contactin 3                                                                | Cluster0007_High in Neuro2A cells |
| 1438628_x_at | Cntn3                | contactin 3                                                                | Cluster0007_High in Neuro2A cells |
| 1429687_at   | Cox7b2               | cytochrome c oxidase subunit VIIb2                                         | Cluster0007_High in Neuro2A cells |
| 1417746_at   | Cplx1                | complexin 1                                                                | Cluster0007_High in Neuro2A cells |
| 1417747_at   | Cplx1                | complexin 1                                                                | Cluster0007_High in Neuro2A cells |
| 1448832_a_at | Cplx1                | complexin 1                                                                | Cluster0007_High in Neuro2A cells |
| 1448289_at   | Crmp1                | collapsin response mediator protein 1                                      | Cluster0007_High in Neuro2A cells |
| 1455516_at   | Csrnp3               | cysteine-serine-rich nuclear protein 3                                     | Cluster0007_High in Neuro2A cells |
| 1456336_at   | Csrnp3               | cysteine-serine-rich nuclear protein 3                                     | Cluster0007_High in Neuro2A cells |
| 1459448_at   | Cyb5r2               | cytochrome b5 reductase 2                                                  | Cluster0007_High in Neuro2A cells |
| 1455526_at   | Diras1               | DIRAS family, GTP-binding RAS-like 1                                       | Cluster0007_High in Neuro2A cells |
| 1420360_at   | Dkk1                 | dickkopf homolog 1 (Xenopus laevis)                                        | Cluster0007_High in Neuro2A cells |
| 1458232_at   | Dkk1                 | dickkopf homolog 1 (Xenopus laevis)                                        | Cluster0007_High in Neuro2A cells |
| 1419580_at   | Dlg4                 | discs, large homolog 4 (Drosophila)                                        | Cluster0007_High in Neuro2A cells |
| 1419581_at   | Dlg4                 | discs, large homolog 4 (Drosophila)                                        | Cluster0007_High in Neuro2A cells |
| 1453544_at   | Dmrtc1c /// Dmrtc1c2 | DMRTC-like family C1c /// DMRTC-like family C1c2                           | Cluster0007_High in Neuro2A cells |
| 1415877_at   | Dpysl3               | dihydropyrimidinase-like 3                                                 | Cluster0007_High in Neuro2A cells |
| 1438789_s_at | Dpysl3               | dihydropyrimidinase-like 3                                                 | Cluster0007_High in Neuro2A cells |
| 1454613_at   | Dpysl3               | dihydropyrimidinase-like 3                                                 | Cluster0007_High in Neuro2A cells |
| 1428653_x_at | Elavl1               | ELAV (embryonic lethal, abnormal vision, Drosophila)-like 1 (Hu antigen R) | Cluster0007_High in Neuro2A cells |
| 1445521_at   | Elavl1               | ELAV (embryonic lethal, abnormal vision, Drosophila)-like 1 (Hu antigen R) | Cluster0007_High in Neuro2A cells |
| 1452858_at   | Elavl1               | ELAV (embryonic lethal, abnormal vision, Drosophila)-like 1 (Hu antigen R) | Cluster0007_High in Neuro2A cells |
| 1421881_a_at | Elavl2               | ELAV (embryonic lethal, abnormal vision, Drosophila)-like 2 (Hu antigen B) | Cluster0007_High in Neuro2A cells |
| 1421882_a_at | Elavl2               | ELAV (embryonic lethal, abnormal vision, Drosophila)-like 2 (Hu antigen B) | Cluster0007_High in Neuro2A cells |
| 1421883_at   | Elavl2               | ELAV (embryonic lethal, abnormal vision, Drosophila)-like 2 (Hu antigen B) | Cluster0007_High in Neuro2A cells |
| 1435871_at   | Elavl3               | ELAV (embryonic lethal, abnormal vision, Drosophila)-like 3 (Hu antigen C) | Cluster0007_High in Neuro2A cells |
| 1452524_a_at | Elavl3               | ELAV (embryonic lethal, abnormal vision, Drosophila)-like 3 (Hu antigen C) | Cluster0007_High in Neuro2A cells |
| 1455484_at   | Elavl3               | ELAV (embryonic lethal, abnormal vision, Drosophila)-like 3 (Hu antigen C) | Cluster0007_High in Neuro2A cells |
| 1428741_at   | Elavl4               | ELAV (embryonic lethal, abnormal vision, Drosophila)-like 4 (Hu antigen D) | Cluster0007_High in Neuro2A cells |
| 1450258_a_at | Elavl4               | ELAV (embryonic lethal, abnormal vision, Drosophila)-like 4 (Hu antigen D) | Cluster0007_High in Neuro2A cells |
| 1452894_at   | Elavl4               | ELAV (embryonic lethal, abnormal vision, Drosophila)-like 4 (Hu antigen D) | Cluster0007_High in Neuro2A cells |
| 1456202_at   | Elfn2                | leucine rich repeat and fibronectin type III, extracellular 2              | Cluster0007_High in Neuro2A cells |
| 1420964_at   | Enc1                 | ectodermal-neural cortex 1                                                 | Cluster0007_High in Neuro2A cells |
| 1440046_at   | Fam199x              | family with sequence similarity 199, X-linked                              | Cluster0007_High in Neuro2A cells |
| 1427356_at   | Fam89a               | family with sequence similarity 89, member A                               | Cluster0007_High in Neuro2A cells |
| 1452826_s_at | Fbxl20               | F-box and leucine-rich repeat protein 20                                   | Cluster0007_High in Neuro2A cells |
| 1456378_s_at | Fbxl20               | F-box and leucine-rich repeat protein 20                                   | Cluster0007_High in Neuro2A cells |
| 1424494_s_at | Flywch2              | FLYWCH family member 2                                                     | Cluster0007_High in Neuro2A cells |
| 1442957_at   | G730013B05Rik        | RIKEN cDNA G730013B05 gene                                                 | Cluster0007_High in Neuro2A cells |
| 1421189_at   | Gabrb3               | gamma-aminobutyric acid (GABA) A receptor, subunit beta 3                  | Cluster0007_High in Neuro2A cells |
| 1433553_at   | Garnl3               | GTPase activating RANGAP domain-like 3                                     | Cluster0007_High in Neuro2A cells |
| 1451094_at   | Ggt7                 | gamma-glutamyltransferase 7                                                | Cluster0007_High in Neuro2A cells |
| 1437522_x_at | Gh                   | growth hormone                                                             | Cluster0007_High in Neuro2A cells |
| 1456595_x_at | Gh                   | growth hormone                                                             | Cluster0007_High in Neuro2A cells |
| 1460310_a_at | Gh                   | growth hormone                                                             | Cluster0007_High in Neuro2A cells |

|              |                                       |                                                                                                           |                                   |
|--------------|---------------------------------------|-----------------------------------------------------------------------------------------------------------|-----------------------------------|
| 1460613_x_at | Gh                                    | growth hormone                                                                                            | Cluster0007_High in Neuro2A cells |
| 1427346_at   | Gm10439 /// Gm15085 /// Gm15128 ///   | predicted gene 10439 /// predicted gene 15085 /// predicted gene 15128 /// leucine zipper protein 4 /// o | Cluster0007_High in Neuro2A cells |
| 1453217_at   | Gm14596 /// Gm16405 /// Gm16430 ///   | predicted gene 14596 /// predicted gene 16405 /// predicted gene 16430 /// Slx-like :                     | Cluster0007_High in Neuro2A cells |
| 1446812_at   | Gm2818                                | Predicted gene 2818                                                                                       | Cluster0007_High in Neuro2A cells |
| 1440692_at   | Gm364                                 | predicted gene 364                                                                                        | Cluster0007_High in Neuro2A cells |
| 1449600_at   | Gm3716                                | predicted gene 3716                                                                                       | Cluster0007_High in Neuro2A cells |
| 1433578_at   | Gm5868 /// Slc10a4                    | predicted gene 5868 /// solute carrier family 10 (sodium/bile acid cotransporter family), member 4        | Cluster0007_High in Neuro2A cells |
| 1440815_x_at | Gm8126 /// Gm8267 /// LOC624112       | predicted gene 8126 /// predicted gene 8267 /// hypothetical protein LOC624112                            | Cluster0007_High in Neuro2A cells |
| 1440074_at   | Gm9918                                | predicted gene 9918                                                                                       | Cluster0007_High in Neuro2A cells |
| 1434672_at   | Gpr22                                 | G protein-coupled receptor 22                                                                             | Cluster0007_High in Neuro2A cells |
| 1421350_a_at | Grip1                                 | glutamate receptor interacting protein 1                                                                  | Cluster0007_High in Neuro2A cells |
| 1421061_at   | Guca1a                                | guanylate cyclase activator 1a (retina)                                                                   | Cluster0007_High in Neuro2A cells |
| 1420871_at   | Gucy1b3                               | guanylate cyclase 1, soluble, beta 3                                                                      | Cluster0007_High in Neuro2A cells |
| 1436517_at   | H1fx                                  | H1 histone family, member X                                                                               | Cluster0007_High in Neuro2A cells |
| 1443854_at   | Hand2                                 | heart and neural crest derivatives expressed transcript 2                                                 | Cluster0007_High in Neuro2A cells |
| 1422221_at   | Hand2 /// LOC100046086                | heart and neural crest derivatives expressed transcript 2 /// similar to dHand protein                    | Cluster0007_High in Neuro2A cells |
| 1418268_at   | Htr3a                                 | 5-hydroxytryptamine (serotonin) receptor 3A                                                               | Cluster0007_High in Neuro2A cells |
| 1423290_at   | Hyou1                                 | hypoxia up-regulated 1                                                                                    | Cluster0007_High in Neuro2A cells |
| 1451913_a_at | Hyou1                                 | hypoxia up-regulated 1                                                                                    | Cluster0007_High in Neuro2A cells |
| 1419529_at   | Il23a                                 | interleukin 23, alpha subunit p19                                                                         | Cluster0007_High in Neuro2A cells |
| 1423274_at   | Ints6                                 | integrator complex subunit 6                                                                              | Cluster0007_High in Neuro2A cells |
| 1440557_at   | lpw                                   | Imprinted gene in the Prader-Willi syndrome region                                                        | Cluster0007_High in Neuro2A cells |
| 1434421_at   | Islr2                                 | immunoglobulin superfamily containing leucine-rich repeat 2                                               | Cluster0007_High in Neuro2A cells |
| 1439031_at   | Jph4                                  | junctophilin 4                                                                                            | Cluster0007_High in Neuro2A cells |
| 1425341_at   | Kcnk3                                 | potassium channel, subfamily K, member 3                                                                  | Cluster0007_High in Neuro2A cells |
| 1425342_a_at | Kcnk3                                 | potassium channel, subfamily K, member 3                                                                  | Cluster0007_High in Neuro2A cells |
| 1422945_a_at | Kif5c                                 | kinesin family member 5C                                                                                  | Cluster0007_High in Neuro2A cells |
| 1450804_at   | Kif5c                                 | kinesin family member 5C                                                                                  | Cluster0007_High in Neuro2A cells |
| 1455266_at   | Kif5c                                 | kinesin family member 5C                                                                                  | Cluster0007_High in Neuro2A cells |
| 1429266_at   | Lhfp15                                | lipoma HMGIC fusion partner-like 5                                                                        | Cluster0007_High in Neuro2A cells |
| 1432432_a_at | LOC100044883 /// Rab3c                | similar to RAB3C, member RAS oncogene family /// RAB3C, member RAS oncogene family                        | Cluster0007_High in Neuro2A cells |
| 1449494_at   | LOC100044883 /// Rab3c                | similar to RAB3C, member RAS oncogene family /// RAB3C, member RAS oncogene family                        | Cluster0007_High in Neuro2A cells |
| 1449318_at   | LOC100045019 /// Tubg2                | similar to Tubulin, gamma 2 /// tubulin, gamma 2                                                          | Cluster0007_High in Neuro2A cells |
| 1436041_at   | LOC100046086                          | similar to dHand protein                                                                                  | Cluster0007_High in Neuro2A cells |
| 1450542_s_at | Magea1 /// Magea2 /// Magea3 /// Mage | melanoma antigen, family A, 1 /// melanoma antigen, family A, 2 /// melanoma antigen, family A, 3 /// me  | Cluster0007_High in Neuro2A cells |
| 1422325_at   | Magea5                                | melanoma antigen, family A, 5                                                                             | Cluster0007_High in Neuro2A cells |
| 1417885_at   | Mapt                                  | microtubule-associated protein tau                                                                        | Cluster0007_High in Neuro2A cells |
| 1424719_a_at | Mapt                                  | microtubule-associated protein tau                                                                        | Cluster0007_High in Neuro2A cells |
| 1455028_at   | Mapt                                  | microtubule-associated protein tau                                                                        | Cluster0007_High in Neuro2A cells |
| 1418160_at   | Mkrn3                                 | makorin, ring finger protein, 3                                                                           | Cluster0007_High in Neuro2A cells |
| 1421850_at   | Mtap1b                                | microtubule-associated protein 1B                                                                         | Cluster0007_High in Neuro2A cells |
| 1421851_at   | Mtap1b                                | microtubule-associated protein 1B                                                                         | Cluster0007_High in Neuro2A cells |
| 1450397_at   | Mtap1b                                | microtubule-associated protein 1B                                                                         | Cluster0007_High in Neuro2A cells |
| 1429013_at   | Mtap7d2                               | MAP7 domain containing 2                                                                                  | Cluster0007_High in Neuro2A cells |
| 1431403_a_at | Mtap7d2                               | MAP7 domain containing 2                                                                                  | Cluster0007_High in Neuro2A cells |
| 1432205_a_at | Mtus2                                 | microtubule associated tumor suppressor candidate 2                                                       | Cluster0007_High in Neuro2A cells |
| 1427795_s_at | NA                                    | ---                                                                                                       | Cluster0007_High in Neuro2A cells |
| 1431868_at   | NA                                    | ---                                                                                                       | Cluster0007_High in Neuro2A cells |
| 1435125_at   | NA                                    | ---                                                                                                       | Cluster0007_High in Neuro2A cells |
| 1439174_at   | NA                                    | ---                                                                                                       | Cluster0007_High in Neuro2A cells |
| 1440657_at   | NA                                    | ---                                                                                                       | Cluster0007_High in Neuro2A cells |
| 1444151_at   | NA                                    | ---                                                                                                       | Cluster0007_High in Neuro2A cells |
| 1444767_at   | NA                                    | ---                                                                                                       | Cluster0007_High in Neuro2A cells |
| 1444837_at   | NA                                    | ---                                                                                                       | Cluster0007_High in Neuro2A cells |
| 1445634_at   | NA                                    | ---                                                                                                       | Cluster0007_High in Neuro2A cells |
| 1445804_at   | NA                                    | ---                                                                                                       | Cluster0007_High in Neuro2A cells |
| 1446799_at   | NA                                    | ---                                                                                                       | Cluster0007_High in Neuro2A cells |



|              |                                         |                                                                                                     |                                   |
|--------------|-----------------------------------------|-----------------------------------------------------------------------------------------------------|-----------------------------------|
| 1447453_x_at | NA                                      | ---                                                                                                 | Cluster0007_High in Neuro2A cells |
| 1452452_at   | NA                                      | ---                                                                                                 | Cluster0007_High in Neuro2A cells |
| 1457497_at   | NA                                      | ---                                                                                                 | Cluster0007_High in Neuro2A cells |
| 1458830_at   | NA                                      | ---                                                                                                 | Cluster0007_High in Neuro2A cells |
| 1459714_at   | NA                                      | ---                                                                                                 | Cluster0007_High in Neuro2A cells |
| 1459720_x_at | NA                                      | ---                                                                                                 | Cluster0007_High in Neuro2A cells |
| 1455509_at   | Nacad                                   | NAC alpha domain containing                                                                         | Cluster0007_High in Neuro2A cells |
| 1423172_at   | Napb                                    | N-ethylmaleimide sensitive fusion protein attachment protein beta                                   | Cluster0007_High in Neuro2A cells |
| 1427470_s_at | Napb                                    | N-ethylmaleimide sensitive fusion protein attachment protein beta                                   | Cluster0007_High in Neuro2A cells |
| 1452444_at   | Napb                                    | N-ethylmaleimide sensitive fusion protein attachment protein beta                                   | Cluster0007_High in Neuro2A cells |
| 1421241_at   | Ngfr                                    | nerve growth factor receptor (TNFR superfamily, member 16)                                          | Cluster0007_High in Neuro2A cells |
| 1450177_at   | Ngfr                                    | nerve growth factor receptor (TNFR superfamily, member 16)                                          | Cluster0007_High in Neuro2A cells |
| 1454903_at   | Ngfr                                    | nerve growth factor receptor (TNFR superfamily, member 16)                                          | Cluster0007_High in Neuro2A cells |
| 1449566_at   | Nkx2-5                                  | NK2 transcription factor related, locus 5 (Drosophila)                                              | Cluster0007_High in Neuro2A cells |
| 1450000_at   | Nlrp4c                                  | NLR family, pyrin domain containing 4C                                                              | Cluster0007_High in Neuro2A cells |
| 1436155_at   | Nmnat2                                  | nicotinamide nucleotide adenylyltransferase 2                                                       | Cluster0007_High in Neuro2A cells |
| 1438483_at   | Nos1                                    | nitric oxide synthase 1, neuronal                                                                   | Cluster0007_High in Neuro2A cells |
| 1420801_at   | Npas1                                   | neuronal PAS domain protein 1                                                                       | Cluster0007_High in Neuro2A cells |
| 1443990_at   | Ntrk1                                   | neurotrophic tyrosine kinase, receptor, type 1                                                      | Cluster0007_High in Neuro2A cells |
| 1456035_at   | Nxf3                                    | nuclear RNA export factor 3                                                                         | Cluster0007_High in Neuro2A cells |
| 1427399_a_at | Nxf7                                    | nuclear RNA export factor 7                                                                         | Cluster0007_High in Neuro2A cells |
| 1455743_at   | Olfml2a                                 | olfactomedin-like 2A                                                                                | Cluster0007_High in Neuro2A cells |
| 1417526_at   | Pcbp3                                   | poly(rC) binding protein 3                                                                          | Cluster0007_High in Neuro2A cells |
| 1437722_x_at | Pcbp3                                   | Poly(rC) binding protein 3                                                                          | Cluster0007_High in Neuro2A cells |
| 1417890_at   | Pdcp                                    | pyridoxal (pyridoxine, vitamin B6) phosphatase                                                      | Cluster0007_High in Neuro2A cells |
| 1418620_at   | Phox2a                                  | paired-like homeobox 2a                                                                             | Cluster0007_High in Neuro2A cells |
| 1422232_at   | Phox2b                                  | paired-like homeobox 2b                                                                             | Cluster0007_High in Neuro2A cells |
| 1455907_x_at | Phox2b                                  | paired-like homeobox 2b                                                                             | Cluster0007_High in Neuro2A cells |
| 1420674_at   | Pla2g2e                                 | phospholipase A2, group IIE                                                                         | Cluster0007_High in Neuro2A cells |
| 1439207_at   | Pnma5                                   | paraneoplastic antigen family 5                                                                     | Cluster0007_High in Neuro2A cells |
| 1425304_s_at | Prima1                                  | proline rich membrane anchor 1                                                                      | Cluster0007_High in Neuro2A cells |
| 1422530_at   | Prph                                    | peripherin                                                                                          | Cluster0007_High in Neuro2A cells |
| 1438333_at   | Prtg                                    | protogenin homolog (Gallus gallus)                                                                  | Cluster0007_High in Neuro2A cells |
| 1456329_at   | Prtg                                    | protogenin homolog (Gallus gallus)                                                                  | Cluster0007_High in Neuro2A cells |
| 1416674_at   | Ptpru                                   | protein tyrosine phosphatase, receptor type, U                                                      | Cluster0007_High in Neuro2A cells |
| 1435047_at   | Rab3c                                   | RAB3C, member RAS oncogene family                                                                   | Cluster0007_High in Neuro2A cells |
| 1421359_at   | Ret                                     | ret proto-oncogene                                                                                  | Cluster0007_High in Neuro2A cells |
| 1436359_at   | Ret                                     | ret proto-oncogene                                                                                  | Cluster0007_High in Neuro2A cells |
| 1420448_at   | Rhox2a                                  | reproductive homeobox 2A                                                                            | Cluster0007_High in Neuro2A cells |
| 1419229_at   | Rhox4a /// Rhox4b /// Rhox4c /// Rhox4d | reproductive homeobox 4A /// reproductive homeobox 4B /// reproductive homeobox 4C /// reproductive | Cluster0007_High in Neuro2A cells |
| 1459042_at   | Rims3                                   | regulating synaptic membrane exocytosis 3                                                           | Cluster0007_High in Neuro2A cells |
| 1436277_at   | Rnf207                                  | ring finger protein 207                                                                             | Cluster0007_High in Neuro2A cells |
| 1437403_at   | Samd5                                   | sterile alpha motif domain containing 5                                                             | Cluster0007_High in Neuro2A cells |
| 1443454_at   | Sctr                                    | secretin receptor                                                                                   | Cluster0007_High in Neuro2A cells |
| 1437977_at   | Sgtb                                    | Small glutamine-rich tetratricopeptide repeat (TPR)-containing, beta                                | Cluster0007_High in Neuro2A cells |
| 1451529_at   | Sgtb                                    | small glutamine-rich tetratricopeptide repeat (TPR)-containing, beta                                | Cluster0007_High in Neuro2A cells |
| 1424211_at   | Slc25a33                                | solute carrier family 25, member 33                                                                 | Cluster0007_High in Neuro2A cells |
| 1426712_at   | Slc6a15                                 | solute carrier family 6 (neurotransmitter transporter), member 15                                   | Cluster0007_High in Neuro2A cells |
| 1456187_at   | Slc7a14                                 | solute carrier family 7 (cationic amino acid transporter, y+ system), member 14                     | Cluster0007_High in Neuro2A cells |
| 1429817_at   | Sohlh2                                  | spermatogenesis and oogenesis specific basic helix-loop-helix 2                                     | Cluster0007_High in Neuro2A cells |
| 1440029_at   | St8sia3                                 | ST8 alpha-N-acetyl-neuraminide alpha-2,8-sialyltransferase 3                                        | Cluster0007_High in Neuro2A cells |
| 1418957_at   | Stac                                    | src homology three (SH3) and cysteine rich domain                                                   | Cluster0007_High in Neuro2A cells |
| 1423280_at   | Stmn2                                   | stathmin-like 2                                                                                     | Cluster0007_High in Neuro2A cells |
| 1418105_at   | Stmn4                                   | stathmin-like 4                                                                                     | Cluster0007_High in Neuro2A cells |
| 1448366_at   | Stx1a                                   | syntaxin 1A (brain)                                                                                 | Cluster0007_High in Neuro2A cells |
| 1421606_a_at | Sult4a1                                 | sulfotransferase family 4A, member 1                                                                | Cluster0007_High in Neuro2A cells |
| 1433714_at   | Sult4a1                                 | sulfotransferase family 4A, member 1                                                                | Cluster0007_High in Neuro2A cells |

|              |                       |                                                                                               |                                                 |
|--------------|-----------------------|-----------------------------------------------------------------------------------------------|-------------------------------------------------|
| 1453715_at   | Sv2c                  | synaptic vesicle glycoprotein 2c                                                              | Cluster0007_High in Neuro2A cells               |
| 1421990_at   | Syt1                  | synaptotagmin I                                                                               | Cluster0007_High in Neuro2A cells               |
| 1431191_a_at | Syt1                  | synaptotagmin I                                                                               | Cluster0007_High in Neuro2A cells               |
| 1433884_at   | Syt1                  | synaptotagmin I                                                                               | Cluster0007_High in Neuro2A cells               |
| 1438282_at   | Syt1                  | synaptotagmin I                                                                               | Cluster0007_High in Neuro2A cells               |
| 1426106_a_at | Syt6                  | synaptotagmin VI                                                                              | Cluster0007_High in Neuro2A cells               |
| 1425158_at   | Tbx20                 | T-box 20                                                                                      | Cluster0007_High in Neuro2A cells               |
| 1453351_at   | Tbx20                 | T-box 20                                                                                      | Cluster0007_High in Neuro2A cells               |
| 1456033_at   | Tbx4                  | T-box 4                                                                                       | Cluster0007_High in Neuro2A cells               |
| 1432159_a_at | Tex13                 | testis expressed gene 13                                                                      | Cluster0007_High in Neuro2A cells               |
| 1450555_at   | Tex13                 | testis expressed gene 13                                                                      | Cluster0007_High in Neuro2A cells               |
| 1415715_at   | Tmem129               | transmembrane protein 129                                                                     | Cluster0007_High in Neuro2A cells               |
| 1436656_at   | Tmem150c              | transmembrane protein 150C                                                                    | Cluster0007_High in Neuro2A cells               |
| 1439807_at   | Tmem74                | transmembrane protein 74                                                                      | Cluster0007_High in Neuro2A cells               |
| 1456684_at   | Tmem74                | transmembrane protein 74                                                                      | Cluster0007_High in Neuro2A cells               |
| 1435314_at   | Tph2                  | tryptophan hydroxylase 2                                                                      | Cluster0007_High in Neuro2A cells               |
| 1456967_at   | Trim66                | tripartite motif-containing 66                                                                | Cluster0007_High in Neuro2A cells               |
| 1421201_a_at | Tro                   | trophinin                                                                                     | Cluster0007_High in Neuro2A cells               |
| 1437095_at   | Tspan18               | tetraspanin 18                                                                                | Cluster0007_High in Neuro2A cells               |
| 1429416_at   | Ttc9b                 | tetratricopeptide repeat domain 9B                                                            | Cluster0007_High in Neuro2A cells               |
| 1420925_at   | Tub                   | tubby candidate gene                                                                          | Cluster0007_High in Neuro2A cells               |
| 1415978_at   | Tubb3                 | tubulin, beta 3                                                                               | Cluster0007_High in Neuro2A cells               |
| 1448260_at   | Uchl1                 | ubiquitin carboxy-terminal hydrolase L1                                                       | Cluster0007_High in Neuro2A cells               |
| 1449522_at   | Unc5c                 | unc-5 homolog C (C. elegans)                                                                  | Cluster0007_High in Neuro2A cells               |
| 1433551_at   | Vat1l                 | vesicle amine transport protein 1 homolog-like (T. californica)                               | Cluster0007_High in Neuro2A cells               |
| 1418545_at   | Wasf1                 | WASP family 1                                                                                 | Cluster0007_High in Neuro2A cells               |
| 1416334_at   | Wwox                  | WW domain-containing oxidoreductase                                                           | Cluster0007_High in Neuro2A cells               |
| 1428434_at   | Zcchc12               | zinc finger, CCHC domain containing 12                                                        | Cluster0007_High in Neuro2A cells               |
| 1427684_at   | Zfp264                | zinc finger protein 264                                                                       | Cluster0007_High in Neuro2A cells               |
| 1423261_at   | 1500015O10Rik         | RIKEN cDNA 1500015O10 gene                                                                    | Cluster0008_High in differentiating osteoblasts |
| 1440780_x_at | 1500015O10Rik         | RIKEN cDNA 1500015O10 gene                                                                    | Cluster0008_High in differentiating osteoblasts |
| 1460049_s_at | 1500015O10Rik         | RIKEN cDNA 1500015O10 gene                                                                    | Cluster0008_High in differentiating osteoblasts |
| 1445896_at   | 2810433D01Rik         | RIKEN cDNA 2810433D01 gene                                                                    | Cluster0008_High in differentiating osteoblasts |
| 1450770_at   | 3632451O06Rik         | RIKEN cDNA 3632451O06 gene                                                                    | Cluster0008_High in differentiating osteoblasts |
| 1423473_at   |                       | Sep-02 septin 2                                                                               | Cluster0008_High in differentiating osteoblasts |
| 1421645_at   | 9930013L23Rik         | RIKEN cDNA 9930013L23 gene                                                                    | Cluster0008_High in differentiating osteoblasts |
| 1429987_at   | 9930013L23Rik         | RIKEN cDNA 9930013L23 gene                                                                    | Cluster0008_High in differentiating osteoblasts |
| 1460465_at   | A930038C07Rik         | RIKEN cDNA A930038C07 gene                                                                    | Cluster0008_High in differentiating osteoblasts |
| 1427053_at   | Abi3bp                | ABI gene family, member 3 (NESH) binding protein                                              | Cluster0008_High in differentiating osteoblasts |
| 1427054_s_at | Abi3bp                | ABI gene family, member 3 (NESH) binding protein                                              | Cluster0008_High in differentiating osteoblasts |
| 1421171_at   | Adam12                | a disintegrin and metallopeptidase domain 12 (meltrin alpha)                                  | Cluster0008_High in differentiating osteoblasts |
| 1421172_at   | Adam12                | a disintegrin and metallopeptidase domain 12 (meltrin alpha)                                  | Cluster0008_High in differentiating osteoblasts |
| 1435990_at   | Adamts2               | a disintegrin-like and metallopeptidase (reprolysin type) with thrombospondin type 1 motif, 2 | Cluster0008_High in differentiating osteoblasts |
| 1457058_at   | Adamts2               | a disintegrin-like and metallopeptidase (reprolysin type) with thrombospondin type 1 motif, 2 | Cluster0008_High in differentiating osteoblasts |
| 1430313_at   | Adamts1               | ADAMTS-like 1                                                                                 | Cluster0008_High in differentiating osteoblasts |
| 1442063_at   | Adamts1               | ADAMTS-like 1                                                                                 | Cluster0008_High in differentiating osteoblasts |
| 1415832_at   | Agtr2                 | angiotensin II receptor, type 2                                                               | Cluster0008_High in differentiating osteoblasts |
| 1457042_at   | AI256396              | EST AI256396                                                                                  | Cluster0008_High in differentiating osteoblasts |
| 1421421_at   | Angptl1               | angiopoietin-like 1                                                                           | Cluster0008_High in differentiating osteoblasts |
| 1455224_at   | Angptl1               | angiopoietin-like 1                                                                           | Cluster0008_High in differentiating osteoblasts |
| 1451446_at   | Antxr1                | anthrax toxin receptor 1                                                                      | Cluster0008_High in differentiating osteoblasts |
| 1416371_at   | Apod                  | apolipoprotein D                                                                              | Cluster0008_High in differentiating osteoblasts |
| 1444564_at   | Apod /// LOC100047583 | apolipoprotein D /// similar to apolipoprotein D                                              | Cluster0008_High in differentiating osteoblasts |
| 1416652_at   | Aspn                  | asporin                                                                                       | Cluster0008_High in differentiating osteoblasts |
| 1448421_s_at | Aspn                  | asporin                                                                                       | Cluster0008_High in differentiating osteoblasts |
| 1418604_at   | Avpr1a                | arginine vasopressin receptor 1A                                                              | Cluster0008_High in differentiating osteoblasts |
| 1433434_at   | AW551984              | expressed sequence AW551984                                                                   | Cluster0008_High in differentiating osteoblasts |

|              |                  |                                                                                            |                                                 |
|--------------|------------------|--------------------------------------------------------------------------------------------|-------------------------------------------------|
| 1435468_at   | B3gnt9           | UDP-GlcNAc:betaGal beta-1,3-N-acetylglucosaminyltransferase 9                              | Cluster0008_High in differentiating osteoblasts |
| 1429273_at   | Bmper            | BMP-binding endothelial regulator                                                          | Cluster0008_High in differentiating osteoblasts |
| 1455416_at   | C130021I20Rik    | Riken cDNA C130021I20 gene                                                                 | Cluster0008_High in differentiating osteoblasts |
| 1424762_at   | C1qtnf5 /// Mfrp | C1q and tumor necrosis factor related protein 5 /// membrane-type frizzled-related protein | Cluster0008_High in differentiating osteoblasts |
| 1429030_at   | C1qtnf7          | C1q and tumor necrosis factor related protein 7                                            | Cluster0008_High in differentiating osteoblasts |
| 1460163_at   | C1qtnf7          | C1q and tumor necrosis factor related protein 7                                            | Cluster0008_High in differentiating osteoblasts |
| 1449297_at   | Casp12           | caspase 12                                                                                 | Cluster0008_High in differentiating osteoblasts |
| 1426139_a_at | Ccr1             | chemokine (C-C motif) receptor-like 1                                                      | Cluster0008_High in differentiating osteoblasts |
| 1450757_at   | Cdh11            | cadherin 11                                                                                | Cluster0008_High in differentiating osteoblasts |
| 1435345_at   | Cercam           | cerebral endothelial cell adhesion molecule                                                | Cluster0008_High in differentiating osteoblasts |
| 1421295_at   | Chrd1            | chordin-like 1                                                                             | Cluster0008_High in differentiating osteoblasts |
| 1434201_at   | Chrd1            | chordin-like 1                                                                             | Cluster0008_High in differentiating osteoblasts |
| 1418796_at   | Clec11a          | C-type lectin domain family 11, member a                                                   | Cluster0008_High in differentiating osteoblasts |
| 1427391_a_at | Col12a1          | collagen, type XII, alpha 1                                                                | Cluster0008_High in differentiating osteoblasts |
| 1434411_at   | Col12a1          | collagen, type XII, alpha 1                                                                | Cluster0008_High in differentiating osteoblasts |
| 1427168_a_at | Col14a1          | collagen, type XIV, alpha 1                                                                | Cluster0008_High in differentiating osteoblasts |
| 1428455_at   | Col14a1          | collagen, type XIV, alpha 1                                                                | Cluster0008_High in differentiating osteoblasts |
| 1453931_at   | Col14a1          | collagen, type XIV, alpha 1                                                                | Cluster0008_High in differentiating osteoblasts |
| 1427884_at   | Col3a1           | collagen, type III, alpha 1                                                                | Cluster0008_High in differentiating osteoblasts |
| 1450625_at   | Col5a2           | collagen, type V, alpha 2                                                                  | Cluster0008_High in differentiating osteoblasts |
| 1418440_at   | Col8a1           | collagen, type VIII, alpha 1                                                               | Cluster0008_High in differentiating osteoblasts |
| 1418441_at   | Col8a1           | collagen, type VIII, alpha 1                                                               | Cluster0008_High in differentiating osteoblasts |
| 1447819_x_at | Col8a1           | collagen, type VIII, alpha 1                                                               | Cluster0008_High in differentiating osteoblasts |
| 1455627_at   | Col8a1           | collagen, type VIII, alpha 1                                                               | Cluster0008_High in differentiating osteoblasts |
| 1434667_at   | Col8a2           | collagen, type VIII, alpha 2                                                               | Cluster0008_High in differentiating osteoblasts |
| 1440617_at   | Cpa6             | carboxypeptidase A6                                                                        | Cluster0008_High in differentiating osteoblasts |
| 1448901_at   | Cpxm1            | carboxypeptidase X 1 (M14 family)                                                          | Cluster0008_High in differentiating osteoblasts |
| 1419000_at   | Cpxm2            | carboxypeptidase X 2 (M14 family)                                                          | Cluster0008_High in differentiating osteoblasts |
| 1460248_at   | Cpxm2            | carboxypeptidase X 2 (M14 family)                                                          | Cluster0008_High in differentiating osteoblasts |
| 1426251_at   | Cpz              | carboxypeptidase Z                                                                         | Cluster0008_High in differentiating osteoblasts |
| 1451191_at   | Crabp2           | cellular retinoic acid binding protein II                                                  | Cluster0008_High in differentiating osteoblasts |
| 1452968_at   | Cthrc1           | collagen triple helix repeat containing 1                                                  | Cluster0008_High in differentiating osteoblasts |
| 1450080_at   | Cxx1c            | CAAX box 1 homolog C (human)                                                               | Cluster0008_High in differentiating osteoblasts |
| 1436736_x_at | D0H4S114         | DNA segment, human D4S114                                                                  | Cluster0008_High in differentiating osteoblasts |
| 1450839_at   | D0H4S114         | DNA segment, human D4S114                                                                  | Cluster0008_High in differentiating osteoblasts |
| 1420097_at   | D13Ert787e       | DNA segment, Chr 13, ERATO Doi 787, expressed                                              | Cluster0008_High in differentiating osteoblasts |
| 1458662_at   | Daam1            | dishevelled associated activator of morphogenesis 1                                        | Cluster0008_High in differentiating osteoblasts |
| 1417318_at   | Dbc1             | deleted in bladder cancer 1 (human)                                                        | Cluster0008_High in differentiating osteoblasts |
| 1417312_at   | Dkk3             | dickkopf homolog 3 (Xenopus laevis)                                                        | Cluster0008_High in differentiating osteoblasts |
| 1426005_at   | Dmp1             | dentin matrix protein 1                                                                    | Cluster0008_High in differentiating osteoblasts |
| 1443745_s_at | Dmp1             | dentin matrix protein 1                                                                    | Cluster0008_High in differentiating osteoblasts |
| 1443746_x_at | Dmp1             | dentin matrix protein 1                                                                    | Cluster0008_High in differentiating osteoblasts |
| 1425622_at   | Edil3            | EGF-like repeats and discoidin I-like domains 3                                            | Cluster0008_High in differentiating osteoblasts |
| 1433474_at   | Edil3            | EGF-like repeats and discoidin I-like domains 3                                            | Cluster0008_High in differentiating osteoblasts |
| 1433525_at   | Ednra            | endothelin receptor type A                                                                 | Cluster0008_High in differentiating osteoblasts |
| 1451691_at   | Ednra            | endothelin receptor type A                                                                 | Cluster0008_High in differentiating osteoblasts |
| 1460513_a_at | Ednra            | endothelin receptor type A                                                                 | Cluster0008_High in differentiating osteoblasts |
| 1419332_at   | Egfl6            | EGF-like-domain, multiple 6                                                                | Cluster0008_High in differentiating osteoblasts |
| 1420854_at   | Eln              | elastin                                                                                    | Cluster0008_High in differentiating osteoblasts |
| 1420855_at   | Eln              | elastin                                                                                    | Cluster0008_High in differentiating osteoblasts |
| 1425310_a_at | Emid2            | EMI domain containing 2                                                                    | Cluster0008_High in differentiating osteoblasts |
| 1425574_at   | Epha3            | Eph receptor A3                                                                            | Cluster0008_High in differentiating osteoblasts |
| 1425575_at   | Epha3            | Eph receptor A3                                                                            | Cluster0008_High in differentiating osteoblasts |
| 1426057_a_at | Epha3            | Eph receptor A3                                                                            | Cluster0008_High in differentiating osteoblasts |
| 1455426_at   | Epha3            | Eph receptor A3                                                                            | Cluster0008_High in differentiating osteoblasts |
| 1453192_at   | Fam101a          | family with sequence similarity 101, member A                                              | Cluster0008_High in differentiating osteoblasts |
| 1438007_at   | Fam19a2          | family with sequence similarity 19, member A2                                              | Cluster0008_High in differentiating osteoblasts |

|              |                         |                                                                                                       |                                                 |
|--------------|-------------------------|-------------------------------------------------------------------------------------------------------|-------------------------------------------------|
| 1424680_at   | Fam26e                  | family with sequence similarity 26, member E                                                          | Cluster0008_High in differentiating osteoblasts |
| 1417552_at   | Fap                     | fibroblast activation protein                                                                         | Cluster0008_High in differentiating osteoblasts |
| 1438870_at   | Fbn1                    | fibrillin 1                                                                                           | Cluster0008_High in differentiating osteoblasts |
| 1449528_at   | Figf                    | c-fos induced growth factor                                                                           | Cluster0008_High in differentiating osteoblasts |
| 1433481_at   | Fkbp14                  | FK506 binding protein 14                                                                              | Cluster0008_High in differentiating osteoblasts |
| 1416803_at   | Fkbp7                   | FK506 binding protein 7                                                                               | Cluster0008_High in differentiating osteoblasts |
| 1415939_at   | Fmod                    | fibromodulin                                                                                          | Cluster0008_High in differentiating osteoblasts |
| 1437324_x_at | Fmod                    | fibromodulin                                                                                          | Cluster0008_High in differentiating osteoblasts |
| 1437685_x_at | Fmod                    | fibromodulin                                                                                          | Cluster0008_High in differentiating osteoblasts |
| 1437718_x_at | Fmod                    | fibromodulin                                                                                          | Cluster0008_High in differentiating osteoblasts |
| 1438966_x_at | Fmod                    | fibromodulin                                                                                          | Cluster0008_High in differentiating osteoblasts |
| 1456084_x_at | Fmod                    | fibromodulin                                                                                          | Cluster0008_High in differentiating osteoblasts |
| 1455280_at   | Frem1                   | Fras1 related extracellular matrix protein 1                                                          | Cluster0008_High in differentiating osteoblasts |
| 1422985_at   | Fzd1                    | frizzled homolog 1 (Drosophila)                                                                       | Cluster0008_High in differentiating osteoblasts |
| 1437284_at   | Fzd1                    | frizzled homolog 1 (Drosophila)                                                                       | Cluster0008_High in differentiating osteoblasts |
| 1445815_at   | Fzd8                    | frizzled homolog 8 (Drosophila)                                                                       | Cluster0008_High in differentiating osteoblasts |
| 1422942_at   | Galr2                   | galanin receptor 2                                                                                    | Cluster0008_High in differentiating osteoblasts |
| 1417399_at   | Gas6                    | growth arrest specific 6                                                                              | Cluster0008_High in differentiating osteoblasts |
| 1424007_at   | Gdf10                   | growth differentiation factor 10                                                                      | Cluster0008_High in differentiating osteoblasts |
| 1421973_at   | Gfra1                   | glial cell line derived neurotrophic factor family receptor alpha 1                                   | Cluster0008_High in differentiating osteoblasts |
| 1450440_at   | Gfra1                   | glial cell line derived neurotrophic factor family receptor alpha 1                                   | Cluster0008_High in differentiating osteoblasts |
| 1445898_at   | Ggcx                    | gamma-glutamyl carboxylase                                                                            | Cluster0008_High in differentiating osteoblasts |
| 1415801_at   | Gja1                    | gap junction protein, alpha 1                                                                         | Cluster0008_High in differentiating osteoblasts |
| 1430385_a_at | Glb1l                   | galactosidase, beta 1-like                                                                            | Cluster0008_High in differentiating osteoblasts |
| 1427789_s_at | Gnas                    | GNAS (guanine nucleotide binding protein, alpha stimulating) complex locus                            | Cluster0008_High in differentiating osteoblasts |
| 1450990_at   | Gpc3                    | glypican 3                                                                                            | Cluster0008_High in differentiating osteoblasts |
| 1426973_at   | Gpr153                  | G protein-coupled receptor 153                                                                        | Cluster0008_High in differentiating osteoblasts |
| 1423171_at   | Gpr88                   | G-protein coupled receptor 88                                                                         | Cluster0008_High in differentiating osteoblasts |
| 1449106_at   | Gpx3                    | glutathione peroxidase 3                                                                              | Cluster0008_High in differentiating osteoblasts |
| 1417836_at   | Gpx7                    | glutathione peroxidase 7                                                                              | Cluster0008_High in differentiating osteoblasts |
| 1444302_at   | Gxylt2 /// LOC100048436 | glucoside xylosyltransferase 2 /// similar to CDNA sequence BC049816                                  | Cluster0008_High in differentiating osteoblasts |
| 1455962_at   | Hhat                    | hedgheg acyltransferase                                                                               | Cluster0008_High in differentiating osteoblasts |
| 1422152_at   | Hmx1                    | H6 homeobox 1                                                                                         | Cluster0008_High in differentiating osteoblasts |
| 1422919_at   | Hrasls                  | HRAS-like suppressor                                                                                  | Cluster0008_High in differentiating osteoblasts |
| 1417485_at   | Ibsp                    | integrin binding sialoprotein                                                                         | Cluster0008_High in differentiating osteoblasts |
| 1429065_at   | Ikbip                   | IKKBK interacting protein                                                                             | Cluster0008_High in differentiating osteoblasts |
| 1435714_x_at | Il17d /// LOC100046772  | interleukin 17D /// similar to IL-17D                                                                 | Cluster0008_High in differentiating osteoblasts |
| 1431920_a_at | Il34                    | interleukin 34                                                                                        | Cluster0008_High in differentiating osteoblasts |
| 1418517_at   | Irx3                    | Iroquois related homeobox 3 (Drosophila)                                                              | Cluster0008_High in differentiating osteoblasts |
| 1418450_at   | Islr                    | immunoglobulin superfamily containing leucine-rich repeat                                             | Cluster0008_High in differentiating osteoblasts |
| 1436987_at   | Ism1                    | isthmin 1 homolog (zebrafish)                                                                         | Cluster0008_High in differentiating osteoblasts |
| 1436988_at   | Ism1                    | isthmin 1 homolog (zebrafish)                                                                         | Cluster0008_High in differentiating osteoblasts |
| 1425039_at   | Itgb1                   | integrin, beta-like 1                                                                                 | Cluster0008_High in differentiating osteoblasts |
| 1423608_at   | Itm2a                   | integral membrane protein 2A                                                                          | Cluster0008_High in differentiating osteoblasts |
| 1451047_at   | Itm2a                   | integral membrane protein 2A                                                                          | Cluster0008_High in differentiating osteoblasts |
| 1418156_at   | Kcne4                   | potassium voltage-gated channel, Isk-related subfamily, gene 4                                        | Cluster0008_High in differentiating osteoblasts |
| 1448550_at   | Lbp                     | lipopolysaccharide binding protein                                                                    | Cluster0008_High in differentiating osteoblasts |
| 1449531_at   | Leprel2                 | leprecan-like 2                                                                                       | Cluster0008_High in differentiating osteoblasts |
| 1450988_at   | Lgr5                    | leucine rich repeat containing G protein coupled receptor 5                                           | Cluster0008_High in differentiating osteoblasts |
| 1428005_at   | LOC100045982 /// Mosc1  | similar to MOSC domain-containing protein 1, mitochondrial /// MOCO sulphurase C-terminal domain cont | Cluster0008_High in differentiating osteoblasts |
| 1436055_at   | Lrrc15                  | leucine rich repeat containing 15                                                                     | Cluster0008_High in differentiating osteoblasts |
| 1453214_at   | Lrrc15                  | leucine rich repeat containing 15                                                                     | Cluster0008_High in differentiating osteoblasts |
| 1418061_at   | Ltbp2                   | latent transforming growth factor beta binding protein 2                                              | Cluster0008_High in differentiating osteoblasts |
| 1423607_at   | Lum                     | lumican                                                                                               | Cluster0008_High in differentiating osteoblasts |
| 1419442_at   | Matn2                   | matrilin 2                                                                                            | Cluster0008_High in differentiating osteoblasts |
| 1455978_a_at | Matn2                   | matrilin 2                                                                                            | Cluster0008_High in differentiating osteoblasts |
| 1418464_at   | Matn4                   | matrilin 4                                                                                            | Cluster0008_High in differentiating osteoblasts |

|              |          |                                                                                                  |                                                 |
|--------------|----------|--------------------------------------------------------------------------------------------------|-------------------------------------------------|
| 1437057_at   | Megf6    | multiple EGF-like-domains 6                                                                      | Cluster0008_High in differentiating osteoblasts |
| 1437058_at   | Megf6    | multiple EGF-like-domains 6                                                                      | Cluster0008_High in differentiating osteoblasts |
| 1417359_at   | Mfap2    | microfibrillar-associated protein 2                                                              | Cluster0008_High in differentiating osteoblasts |
| 1424010_at   | Mfap4    | microfibrillar-associated protein 4                                                              | Cluster0008_High in differentiating osteoblasts |
| 1418454_at   | Mfap5    | microfibrillar associated protein 5                                                              | Cluster0008_High in differentiating osteoblasts |
| 1449082_at   | Mfap5    | microfibrillar associated protein 5                                                              | Cluster0008_High in differentiating osteoblasts |
| 1448416_at   | Mgp      | matrix Gla protein                                                                               | Cluster0008_High in differentiating osteoblasts |
| 1422626_at   | Mmp16    | matrix metalloproteinase 16                                                                      | Cluster0008_High in differentiating osteoblasts |
| 1443412_s_at | Mmp16    | matrix metalloproteinase 16                                                                      | Cluster0008_High in differentiating osteoblasts |
| 1417281_a_at | Mmp23    | matrix metalloproteinase 23                                                                      | Cluster0008_High in differentiating osteoblasts |
| 1417282_at   | Mmp23    | matrix metalloproteinase 23                                                                      | Cluster0008_High in differentiating osteoblasts |
| 1418945_at   | Mmp3     | matrix metalloproteinase 3                                                                       | Cluster0008_High in differentiating osteoblasts |
| 1421044_at   | Mrc2     | mannose receptor, C type 2                                                                       | Cluster0008_High in differentiating osteoblasts |
| 1448601_s_at | Msx1     | homeobox, msh-like 1                                                                             | Cluster0008_High in differentiating osteoblasts |
| 1430539_at   | Mxra7    | matrix-remodelling associated 7                                                                  | Cluster0008_High in differentiating osteoblasts |
| 1440975_at   | Mxra7    | matrix-remodelling associated 7                                                                  | Cluster0008_High in differentiating osteoblasts |
| 1453855_at   | Mxra7    | matrix-remodelling associated 7                                                                  | Cluster0008_High in differentiating osteoblasts |
| 1452330_a_at | Mxra8    | matrix-remodelling associated 8                                                                  | Cluster0008_High in differentiating osteoblasts |
| 1435120_at   | NA       | ---                                                                                              | Cluster0008_High in differentiating osteoblasts |
| 1443755_at   | NA       | ---                                                                                              | Cluster0008_High in differentiating osteoblasts |
| 1444704_at   | NA       | ---                                                                                              | Cluster0008_High in differentiating osteoblasts |
| 1445758_at   | NA       | ---                                                                                              | Cluster0008_High in differentiating osteoblasts |
| 1447771_at   | NA       | ---                                                                                              | Cluster0008_High in differentiating osteoblasts |
| 1457373_at   | NA       | ---                                                                                              | Cluster0008_High in differentiating osteoblasts |
| 1434905_at   | Ndufa4l2 | NADH dehydrogenase (ubiquinone) 1 alpha subcomplex, 4-like 2                                     | Cluster0008_High in differentiating osteoblasts |
| 1432517_a_at | Nnmt     | nicotinamide N-methyltransferase                                                                 | Cluster0008_High in differentiating osteoblasts |
| 1455663_at   | Olfml1   | olfactomedin-like 1                                                                              | Cluster0008_High in differentiating osteoblasts |
| 1448475_at   | Olfml3   | olfactomedin-like 3                                                                              | Cluster0008_High in differentiating osteoblasts |
| 1446951_at   | P4ha3    | procollagen-proline, 2-oxoglutarate 4-dioxygenase (proline 4-hydroxylase), alpha polypeptide III | Cluster0008_High in differentiating osteoblasts |
| 1451454_at   | Pcdh20   | protocadherin 20                                                                                 | Cluster0008_High in differentiating osteoblasts |
| 1418941_at   | Pcdhb22  | protocadherin beta 22                                                                            | Cluster0008_High in differentiating osteoblasts |
| 1422640_at   | Pcdhb9   | protocadherin beta 9                                                                             | Cluster0008_High in differentiating osteoblasts |
| 1451406_a_at | Pcsk5    | proprotein convertase subtilisin/kexin type 5                                                    | Cluster0008_High in differentiating osteoblasts |
| 1426319_at   | Pdgfd    | platelet-derived growth factor, D polypeptide                                                    | Cluster0008_High in differentiating osteoblasts |
| 1456532_at   | Pdgfd    | platelet-derived growth factor, D polypeptide                                                    | Cluster0008_High in differentiating osteoblasts |
| 1428896_at   | Pdgfrl   | platelet-derived growth factor receptor-like                                                     | Cluster0008_High in differentiating osteoblasts |
| 1421403_at   | Pi15     | peptidase inhibitor 15                                                                           | Cluster0008_High in differentiating osteoblasts |
| 1423606_at   | Postn    | periostin, osteoblast specific factor                                                            | Cluster0008_High in differentiating osteoblasts |
| 1436962_at   | Prdm6    | PR domain containing 6                                                                           | Cluster0008_High in differentiating osteoblasts |
| 1416321_s_at | Prelp    | proline arginine-rich end leucine-rich repeat                                                    | Cluster0008_High in differentiating osteoblasts |
| 1416322_at   | Prelp    | proline arginine-rich end leucine-rich repeat                                                    | Cluster0008_High in differentiating osteoblasts |
| 1434195_at   | Prss35   | protease, serine, 35                                                                             | Cluster0008_High in differentiating osteoblasts |
| 1448816_at   | Ptgis    | prostaglandin I2 (prostacyclin) synthase                                                         | Cluster0008_High in differentiating osteoblasts |
| 1431091_at   | Pygo1    | pygopus 1                                                                                        | Cluster0008_High in differentiating osteoblasts |
| 1436937_at   | Rbms3    | RNA binding motif, single stranded interacting protein                                           | Cluster0008_High in differentiating osteoblasts |
| 1452761_a_at | Rbms3    | RNA binding motif, single stranded interacting protein                                           | Cluster0008_High in differentiating osteoblasts |
| 1452762_at   | Rbms3    | RNA binding motif, single stranded interacting protein                                           | Cluster0008_High in differentiating osteoblasts |
| 1448754_at   | Rbp1     | retinol binding protein 1, cellular                                                              | Cluster0008_High in differentiating osteoblasts |
| 1447890_at   | Rcn1     | reticulocalbin 1                                                                                 | Cluster0008_High in differentiating osteoblasts |
| 1424382_at   | Rcn3     | reticulocalbin 3, EF-hand calcium binding domain                                                 | Cluster0008_High in differentiating osteoblasts |
| 1425296_a_at | Rgs3     | regulator of G-protein signaling 3                                                               | Cluster0008_High in differentiating osteoblasts |
| 1425701_a_at | Rgs3     | regulator of G-protein signaling 3                                                               | Cluster0008_High in differentiating osteoblasts |
| 1427231_at   | Robo1    | roundabout homolog 1 (Drosophila)                                                                | Cluster0008_High in differentiating osteoblasts |
| 1455607_at   | Rspo3    | R-spondin 3 homolog (Xenopus laevis)                                                             | Cluster0008_High in differentiating osteoblasts |
| 1427020_at   | Scara3   | scavenger receptor class A, member 3                                                             | Cluster0008_High in differentiating osteoblasts |
| 1453486_a_at | Scube2   | signal peptide, CUB domain, EGF-like 2                                                           | Cluster0008_High in differentiating osteoblasts |
| 1429459_at   | Sema3d   | sema domain, immunoglobulin domain (Ig), short basic domain, secreted, (semaphorin) 3D           | Cluster0008_High in differentiating osteoblasts |

|              |                           |                                                                                        |                                                 |
|--------------|---------------------------|----------------------------------------------------------------------------------------|-------------------------------------------------|
| 1453148_at   | Sema3d                    | sema domain, immunoglobulin domain (lg), short basic domain, secreted, (semaphorin) 3D | Cluster0008_High in differentiating osteoblasts |
| 1416594_at   | Sfrp1                     | secreted frizzled-related protein 1                                                    | Cluster0008_High in differentiating osteoblasts |
| 1428136_at   | Sfrp1                     | secreted frizzled-related protein 1                                                    | Cluster0008_High in differentiating osteoblasts |
| 1438620_x_at | Sfrp1                     | secreted frizzled-related protein 1                                                    | Cluster0008_High in differentiating osteoblasts |
| 1448395_at   | Sfrp1                     | secreted frizzled-related protein 1                                                    | Cluster0008_High in differentiating osteoblasts |
| 1460187_at   | Sfrp1                     | secreted frizzled-related protein 1                                                    | Cluster0008_High in differentiating osteoblasts |
| 1448201_at   | Sfrp2                     | secreted frizzled-related protein 2                                                    | Cluster0008_High in differentiating osteoblasts |
| 1437168_at   | Sfrs13b                   | splicing factor, arginine/serine-rich 13B                                              | Cluster0008_High in differentiating osteoblasts |
| 1436279_at   | Slc26a7                   | solute carrier family 26, member 7                                                     | Cluster0008_High in differentiating osteoblasts |
| 1415935_at   | Smoc2                     | SPARC related modular calcium binding 2                                                | Cluster0008_High in differentiating osteoblasts |
| 1431362_a_at | Smoc2                     | SPARC related modular calcium binding 2                                                | Cluster0008_High in differentiating osteoblasts |
| 1429571_a_at | Spaca1                    | sperm acrosome associated 1                                                            | Cluster0008_High in differentiating osteoblasts |
| 1449979_a_at | Spock3                    | sparc/osteonectin, cwcv and kazal-like domains proteoglycan 3                          | Cluster0008_High in differentiating osteoblasts |
| 1451939_a_at | Srpx                      | sushi-repeat-containing protein                                                        | Cluster0008_High in differentiating osteoblasts |
| 1427919_at   | Srpx2                     | sushi-repeat-containing protein, X-linked 2                                            | Cluster0008_High in differentiating osteoblasts |
| 1417644_at   | Sspn                      | sarcospan                                                                              | Cluster0008_High in differentiating osteoblasts |
| 1417645_at   | Sspn                      | sarcospan                                                                              | Cluster0008_High in differentiating osteoblasts |
| 1438200_at   | Sulf1                     | sulfatase 1                                                                            | Cluster0008_High in differentiating osteoblasts |
| 1422195_s_at | Tbx15                     | T-box 15                                                                               | Cluster0008_High in differentiating osteoblasts |
| 1417455_at   | Tgfb3                     | transforming growth factor, beta 3                                                     | Cluster0008_High in differentiating osteoblasts |
| 1422571_at   | Thbs2                     | thrombospondin 2                                                                       | Cluster0008_High in differentiating osteoblasts |
| 1447862_x_at | Thbs2                     | thrombospondin 2                                                                       | Cluster0008_High in differentiating osteoblasts |
| 1450663_at   | Thbs2                     | thrombospondin 2                                                                       | Cluster0008_High in differentiating osteoblasts |
| 1420753_at   | Tll1                      | tolloid-like                                                                           | Cluster0008_High in differentiating osteoblasts |
| 1451344_at   | Tmem119                   | transmembrane protein 119                                                              | Cluster0008_High in differentiating osteoblasts |
| 1416710_at   | Tmem35                    | transmembrane protein 35                                                               | Cluster0008_High in differentiating osteoblasts |
| 1437392_at   | Tmem90b                   | transmembrane protein 90B                                                              | Cluster0008_High in differentiating osteoblasts |
| 1439855_at   | Tmtc1                     | transmembrane and tetratricopeptide repeat containing 1                                | Cluster0008_High in differentiating osteoblasts |
| 1417979_at   | Tnmd                      | tenomodulin                                                                            | Cluster0008_High in differentiating osteoblasts |
| 1423312_at   | Tpbp                      | trophoblast glycoprotein                                                               | Cluster0008_High in differentiating osteoblasts |
| 1452770_at   | Vkorc1                    | vitamin K epoxide reductase complex, subunit 1                                         | Cluster0008_High in differentiating osteoblasts |
| 1419015_at   | Wisp2                     | WNT1 inducible signaling pathway protein 2                                             | Cluster0008_High in differentiating osteoblasts |
| 1439044_at   | Zfp354c                   | zinc finger protein 354C                                                               | Cluster0008_High in differentiating osteoblasts |
| 1450321_at   | Zfp354c                   | zinc finger protein 354C                                                               | Cluster0008_High in differentiating osteoblasts |
| 1423477_at   | Zic1                      | zinc finger protein of the cerebellum 1                                                | Cluster0008_High in differentiating osteoblasts |
| 1439627_at   | Zic1                      | zinc finger protein of the cerebellum 1                                                | Cluster0008_High in differentiating osteoblasts |
| 1421539_at   | Zic4                      | zinc finger protein of the cerebellum 4                                                | Cluster0008_High in differentiating osteoblasts |
| 1431446_at   | 0610009B14Rik             | RIKEN cDNA 0610009B14 gene                                                             | Cluster0009_Low in some Paneth cells            |
| 1430331_at   | 1110005A03Rik /// Gm14127 | RIKEN cDNA 1110005A03 gene /// predicted gene 14127                                    | Cluster0009_Low in some Paneth cells            |
| 1454238_a_at | 1700010H22Rik             | RIKEN cDNA 1700010H22 gene                                                             | Cluster0009_Low in some Paneth cells            |
| 1431783_at   | 1700010L04Rik             | RIKEN cDNA 1700010L04 gene                                                             | Cluster0009_Low in some Paneth cells            |
| 1453879_at   | 1700016H13Rik             | RIKEN cDNA 1700016H13 gene                                                             | Cluster0009_Low in some Paneth cells            |
| 1454273_at   | 1700025H01Rik             | RIKEN cDNA 1700025H01 gene                                                             | Cluster0009_Low in some Paneth cells            |
| 1456959_at   | 1700034H15Rik             | RIKEN cDNA 1700034H15 gene                                                             | Cluster0009_Low in some Paneth cells            |
| 1458583_at   | 1700123O12Rik             | RIKEN cDNA 1700123O12 gene                                                             | Cluster0009_Low in some Paneth cells            |
| 1431769_at   | 2210406O10Rik             | RIKEN cDNA 2210406O10 gene                                                             | Cluster0009_Low in some Paneth cells            |
| 1445682_at   | 2700099C18Rik             | NDC80 homolog, kinetochore complex component pseudogene                                | Cluster0009_Low in some Paneth cells            |
| 1432824_at   | 2900018N21Rik             | RIKEN cDNA 2900018N21 gene                                                             | Cluster0009_Low in some Paneth cells            |
| 1445673_at   | 2900052N01Rik             | RIKEN cDNA 2900052N01 gene                                                             | Cluster0009_Low in some Paneth cells            |
| 1454072_at   | 4731417B20Rik             | RIKEN cDNA 4731417B20 gene                                                             | Cluster0009_Low in some Paneth cells            |
| 1432659_at   | 4930402H05Rik             | RIKEN cDNA 4930402H05 gene                                                             | Cluster0009_Low in some Paneth cells            |
| 1432046_at   | 4930404K06Rik             | RIKEN cDNA 4930404K06 gene                                                             | Cluster0009_Low in some Paneth cells            |
| 1431635_at   | 4930412F09Rik             | RIKEN cDNA 4930412F09 gene                                                             | Cluster0009_Low in some Paneth cells            |
| 1454135_at   | 4930458K08Rik             | RIKEN cDNA 4930458K08 gene                                                             | Cluster0009_Low in some Paneth cells            |
| 1439977_at   | 4930515I15                | hypothetical protein 4930515I15                                                        | Cluster0009_Low in some Paneth cells            |
| 1431963_at   | 4930556A20Rik             | RIKEN cDNA 4930556A20 gene                                                             | Cluster0009_Low in some Paneth cells            |
| 1431523_at   | 4930564K09Rik             | RIKEN cDNA 4930564K09 gene                                                             | Cluster0009_Low in some Paneth cells            |

|              |               |                                                           |                                      |
|--------------|---------------|-----------------------------------------------------------|--------------------------------------|
| 1431576_at   | 4933404K08Rik | RIKEN cDNA 4933404K08 gene                                | Cluster0009_Low in some Paneth cells |
| 1432087_at   | 4933406G16Rik | RIKEN cDNA 4933406G16 gene                                | Cluster0009_Low in some Paneth cells |
| 1432252_a_at | 4933406K04Rik | RIKEN cDNA 4933406K04 gene                                | Cluster0009_Low in some Paneth cells |
| 1431519_at   | 4933406L23Rik | RIKEN cDNA 4933406L23 gene                                | Cluster0009_Low in some Paneth cells |
| 1449995_at   | 4933421I07Rik | RIKEN cDNA 4933421I07 gene                                | Cluster0009_Low in some Paneth cells |
| 1433178_at   | 4933427C19Rik | RIKEN cDNA 4933427C19 gene                                | Cluster0009_Low in some Paneth cells |
| 1433099_at   | 4933428L12Rik | RIKEN cDNA 4933428L12 gene                                | Cluster0009_Low in some Paneth cells |
| 1431536_at   | 4933432K03Rik | RIKEN cDNA 4933432K03 gene                                | Cluster0009_Low in some Paneth cells |
| 1454195_at   | 4933433G19Rik | RIKEN cDNA 4933433G19 gene                                | Cluster0009_Low in some Paneth cells |
| 1432248_at   | 5430402P08Rik | RIKEN cDNA 5430402P08 gene                                | Cluster0009_Low in some Paneth cells |
| 1432704_at   | 5730405A17Rik | RIKEN cDNA 5730405A17 gene                                | Cluster0009_Low in some Paneth cells |
| 1433299_at   | 5830461L22Rik | RIKEN cDNA 5830461L22 gene                                | Cluster0009_Low in some Paneth cells |
| 1433121_at   | 5830490A04Rik | RIKEN cDNA 5830490A04 gene                                | Cluster0009_Low in some Paneth cells |
| 1433226_at   | 6330403N20Rik | RIKEN cDNA 6330403N20 gene                                | Cluster0009_Low in some Paneth cells |
| 1454492_at   | 8430418B16Rik | RIKEN cDNA 8430418B16 gene                                | Cluster0009_Low in some Paneth cells |
| 1432303_at   | 9330198I05Rik | RIKEN cDNA 9330198I05 gene                                | Cluster0009_Low in some Paneth cells |
| 1432317_at   | 9430078K24Rik | RIKEN cDNA 9430078K24 gene                                | Cluster0009_Low in some Paneth cells |
| 1454486_at   | 9530002O20Rik | RIKEN cDNA 9530002O20 gene                                | Cluster0009_Low in some Paneth cells |
| 1433195_at   | 9530006O14Rik | RIKEN cDNA 9530006O14 gene                                | Cluster0009_Low in some Paneth cells |
| 1441478_at   | 9930013L23Rik | RIKEN cDNA 9930013L23 gene                                | Cluster0009_Low in some Paneth cells |
| 1432222_at   | A930015G24Rik | RIKEN cDNA A930015G24 gene                                | Cluster0009_Low in some Paneth cells |
| 1419831_at   | AA416453      | expressed sequence AA416453                               | Cluster0009_Low in some Paneth cells |
| 1449748_at   | AA517023      | expressed sequence AA517023                               | Cluster0009_Low in some Paneth cells |
| 1458455_at   | Abra          | actin-binding Rho activating protein                      | Cluster0009_Low in some Paneth cells |
| 1443377_at   | Adam1a        | a disintegrin and metallopeptidase domain 1a              | Cluster0009_Low in some Paneth cells |
| 1449513_at   | Adam24        | a disintegrin and metallopeptidase domain 24 (testase 1)  | Cluster0009_Low in some Paneth cells |
| 1420742_at   | Adam7         | a disintegrin and metallopeptidase domain 7               | Cluster0009_Low in some Paneth cells |
| 1425387_at   | Akr1c20       | aldo-keto reductase family 1, member C20                  | Cluster0009_Low in some Paneth cells |
| 1435809_at   | Ankrd34a      | ankyrin repeat domain 34A                                 | Cluster0009_Low in some Paneth cells |
| 1447974_s_at | Aqp6          | aquaporin 6                                               | Cluster0009_Low in some Paneth cells |
| 1458982_at   | AU014965      | expressed sequence AU014965                               | Cluster0009_Low in some Paneth cells |
| 1442012_at   | AU015791      | expressed sequence AU015791                               | Cluster0009_Low in some Paneth cells |
| 1443487_at   | AU022238      | expressed sequence AU022238                               | Cluster0009_Low in some Paneth cells |
| 1432507_at   | B430319H21Rik | RIKEN cDNA B430319H21 gene                                | Cluster0009_Low in some Paneth cells |
| 1458544_at   | BC059841      | cDNA sequence BC059841                                    | Cluster0009_Low in some Paneth cells |
| 1430454_x_at | Bcl2l2        | BCL2-like 2                                               | Cluster0009_Low in some Paneth cells |
| 1450210_at   | Bmp15         | bone morphogenetic protein 15                             | Cluster0009_Low in some Paneth cells |
| 1453897_at   | C030014A21Rik | RIKEN cDNA C030014A21 gene                                | Cluster0009_Low in some Paneth cells |
| 1441474_at   | C130070B15Rik | RIKEN cDNA C130070B15 gene                                | Cluster0009_Low in some Paneth cells |
| 1448078_at   | C76533        | expressed sequence C76533                                 | Cluster0009_Low in some Paneth cells |
| 1459152_at   | C78515        | expressed sequence C78515                                 | Cluster0009_Low in some Paneth cells |
| 1458826_at   | C78809        | expressed sequence C78809                                 | Cluster0009_Low in some Paneth cells |
| 1444958_at   | C79017        | expressed sequence C79017                                 | Cluster0009_Low in some Paneth cells |
| 1442948_at   | C79452        | expressed sequence C79452                                 | Cluster0009_Low in some Paneth cells |
| 1442934_at   | C81608        | expressed sequence C81608                                 | Cluster0009_Low in some Paneth cells |
| 1434810_a_at | Cage1         | cancer antigen 1                                          | Cluster0009_Low in some Paneth cells |
| 1432522_s_at | Ccdc46        | coiled-coil domain containing 46                          | Cluster0009_Low in some Paneth cells |
| 1431527_at   | Cd164         | CD164 antigen                                             | Cluster0009_Low in some Paneth cells |
| 1425912_at   | Cep164        | centrosomal protein 164                                   | Cluster0009_Low in some Paneth cells |
| 1432330_at   | Cfhr3         | complement factor H-related 3                             | Cluster0009_Low in some Paneth cells |
| 1419320_at   | Chst5         | carbohydrate (N-acetylglucosamine 6-O) sulfotransferase 5 | Cluster0009_Low in some Paneth cells |
| 1441312_at   | Cnnm1         | cyclin M1                                                 | Cluster0009_Low in some Paneth cells |
| 1450462_at   | Crhr2         | corticotropin releasing hormone receptor 2                | Cluster0009_Low in some Paneth cells |
| 1449479_at   | Cyp2b13       | cytochrome P450, family 2, subfamily b, polypeptide 13    | Cluster0009_Low in some Paneth cells |
| 1445243_at   | D10Erttd533e  | DNA segment, Chr 10, ERATO Doi 533, expressed             | Cluster0009_Low in some Paneth cells |
| 1458567_at   | D130017N08Rik | RIKEN cDNA D130017N08 gene                                | Cluster0009_Low in some Paneth cells |
| 1446664_at   | D15Erttd154e  | DNA segment, Chr 15, ERATO Doi 154, expressed             | Cluster0009_Low in some Paneth cells |

|              |                         |                                                                                       |                                      |
|--------------|-------------------------|---------------------------------------------------------------------------------------|--------------------------------------|
| 1459502_at   | D17ErtD589e             | DNA segment, Chr 17, ERATO Doi 589, expressed                                         | Cluster0009_Low in some Paneth cells |
| 1441672_at   | D3ErtD547e              | DNA segment, Chr 3, ERATO Doi 547, expressed                                          | Cluster0009_Low in some Paneth cells |
| 1458422_at   | D730002M21Rik           | RIKEN cDNA D730002M21 gene                                                            | Cluster0009_Low in some Paneth cells |
| 1445119_at   | D7ErtD661e              | DNA segment, Chr 7, ERATO Doi 661, expressed                                          | Cluster0009_Low in some Paneth cells |
| 1441717_at   | D9ErtD596e              | DNA segment, Chr 9, ERATO Doi 596, expressed                                          | Cluster0009_Low in some Paneth cells |
| 1440572_at   | Dusp19                  | dual specificity phosphatase 19                                                       | Cluster0009_Low in some Paneth cells |
| 1450615_at   | Ear4                    | eosinophil-associated, ribonuclease A family, member 4                                | Cluster0009_Low in some Paneth cells |
| 1447760_x_at | Ehf                     | ets homologous factor                                                                 | Cluster0009_Low in some Paneth cells |
| 1442101_at   | Elfn1                   | leucine rich repeat and fibronectin type III, extracellular 1                         | Cluster0009_Low in some Paneth cells |
| 1456559_at   | Emx2os                  | empty spiracles homolog 2 (Drosophila) opposite strand                                | Cluster0009_Low in some Paneth cells |
| 1441838_at   | Ercc1                   | excision repair cross-complementing rodent repair deficiency, complementation group 1 | Cluster0009_Low in some Paneth cells |
| 1458067_at   | Fam179b                 | Family with sequence similarity 179, member B                                         | Cluster0009_Low in some Paneth cells |
| 1454209_at   | Fam57b                  | family with sequence similarity 57, member B                                          | Cluster0009_Low in some Paneth cells |
| 1460155_at   | Fam82b                  | family with sequence similarity 82, member B                                          | Cluster0009_Low in some Paneth cells |
| 1447632_at   | Fancc                   | Fanconi anemia, complementation group C                                               | Cluster0009_Low in some Paneth cells |
| 1430241_at   | Fbxl17                  | F-box and leucine-rich repeat protein 17                                              | Cluster0009_Low in some Paneth cells |
| 1454593_at   | Fgd3                    | FYVE, RhoGEF and PH domain containing 3                                               | Cluster0009_Low in some Paneth cells |
| 1422149_at   | Foxo4                   | forkhead box O4                                                                       | Cluster0009_Low in some Paneth cells |
| 1427617_at   | Fut10                   | fucosyltransferase 10                                                                 | Cluster0009_Low in some Paneth cells |
| 1431025_at   | Fuz                     | fuzzy homolog (Drosophila)                                                            | Cluster0009_Low in some Paneth cells |
| 1425595_at   | Gabbr1                  | gamma-aminobutyric acid (GABA) B receptor, 1                                          | Cluster0009_Low in some Paneth cells |
| 1445846_at   | Gabrg3                  | gamma-aminobutyric acid (GABA) A receptor, subunit gamma 3                            | Cluster0009_Low in some Paneth cells |
| 1452567_at   | Gcap8                   | granule cell antiserum positive 8                                                     | Cluster0009_Low in some Paneth cells |
| 1437607_at   | Gcmt2                   | Glucosaminyl (N-acetyl) transferase 2, I-branching enzyme                             | Cluster0009_Low in some Paneth cells |
| 1439420_x_at | Ggt5                    | gamma-glutamyltransferase 5                                                           | Cluster0009_Low in some Paneth cells |
| 1430740_at   | Gm11651                 | predicted gene 11651                                                                  | Cluster0009_Low in some Paneth cells |
| 1440060_at   | Gm5126                  | predicted pseudogene 5126                                                             | Cluster0009_Low in some Paneth cells |
| 1441575_at   | Gm9930                  | predicted gene 9930                                                                   | Cluster0009_Low in some Paneth cells |
| 1460031_at   | Gpr45                   | G protein-coupled receptor 45                                                         | Cluster0009_Low in some Paneth cells |
| 1430658_a_at | Gsdma2                  | gasdermin A2                                                                          | Cluster0009_Low in some Paneth cells |
| 1441832_at   | Hdac10                  | histone deacetylase 10                                                                | Cluster0009_Low in some Paneth cells |
| 1450132_at   | Hivep3                  | human immunodeficiency virus type I enhancer binding protein 3                        | Cluster0009_Low in some Paneth cells |
| 1422207_at   | Htr5a                   | 5-hydroxytryptamine (serotonin) receptor 5A                                           | Cluster0009_Low in some Paneth cells |
| 1422196_at   | Htr5b                   | 5-hydroxytryptamine (serotonin) receptor 5B                                           | Cluster0009_Low in some Paneth cells |
| 1443272_at   | Igdcc4                  | immunoglobulin superfamily, DCC subclass, member 4                                    | Cluster0009_Low in some Paneth cells |
| 1418918_at   | Igfbp1                  | insulin-like growth factor binding protein 1                                          | Cluster0009_Low in some Paneth cells |
| 1432275_at   | Ikbkb                   | inhibitor of kappaB kinase beta                                                       | Cluster0009_Low in some Paneth cells |
| 1443503_at   | Ip6k3                   | inositol hexaphosphate kinase 3                                                       | Cluster0009_Low in some Paneth cells |
| 1433923_at   | Krt77                   | keratin 77                                                                            | Cluster0009_Low in some Paneth cells |
| 1451859_at   | Krtap6-1                | keratin associated protein 6-1                                                        | Cluster0009_Low in some Paneth cells |
| 1444860_at   | Lama3                   | Laminin, alpha 3                                                                      | Cluster0009_Low in some Paneth cells |
| 1430340_at   | Lca5                    | Leber congenital amaurosis 5 (human)                                                  | Cluster0009_Low in some Paneth cells |
| 1449959_x_at | Lce1h                   | late cornified envelope 1H                                                            | Cluster0009_Low in some Paneth cells |
| 1460078_at   | LOC100047782 /// Zfp771 | similar to crooked legs CG14938-PB /// zinc finger protein 771                        | Cluster0009_Low in some Paneth cells |
| 1440941_at   | LOC552912               | hypothetical LOC552912                                                                | Cluster0009_Low in some Paneth cells |
| 1458581_at   | LOC553093               | hypothetical LOC553093                                                                | Cluster0009_Low in some Paneth cells |
| 1444669_at   | Lrfr1                   | leucine rich repeat and fibronectin type III domain containing 1                      | Cluster0009_Low in some Paneth cells |
| 1454076_at   | Lrrc17                  | leucine rich repeat containing 17                                                     | Cluster0009_Low in some Paneth cells |
| 1449892_at   | Lyz11                   | lysozyme-like 1                                                                       | Cluster0009_Low in some Paneth cells |
| 1437739_a_at | Mamstr                  | MEF2 activating motif and SAP domain containing transcriptional regulator             | Cluster0009_Low in some Paneth cells |
| 1441287_at   | Mbtd1                   | Mbt domain containing 1                                                               | Cluster0009_Low in some Paneth cells |
| 1431282_at   | Med24                   | mediator complex subunit 24                                                           | Cluster0009_Low in some Paneth cells |
| 1419902_at   | NA                      | ---                                                                                   | Cluster0009_Low in some Paneth cells |
| 1420104_at   | NA                      | ---                                                                                   | Cluster0009_Low in some Paneth cells |
| 1420198_at   | NA                      | ---                                                                                   | Cluster0009_Low in some Paneth cells |
| 1420275_at   | NA                      | ---                                                                                   | Cluster0009_Low in some Paneth cells |
| 1430788_at   | NA                      | ---                                                                                   | Cluster0009_Low in some Paneth cells |



|              |          |                                           |                                      |
|--------------|----------|-------------------------------------------|--------------------------------------|
| 1431249_at   | NA       | ---                                       | Cluster0009_Low in some Paneth cells |
| 1431779_at   | NA       | ---                                       | Cluster0009_Low in some Paneth cells |
| 1433042_at   | NA       | ---                                       | Cluster0009_Low in some Paneth cells |
| 1433138_at   | NA       | ---                                       | Cluster0009_Low in some Paneth cells |
| 1438959_x_at | NA       | ---                                       | Cluster0009_Low in some Paneth cells |
| 1439522_at   | NA       | ---                                       | Cluster0009_Low in some Paneth cells |
| 1440149_at   | NA       | ---                                       | Cluster0009_Low in some Paneth cells |
| 1441225_at   | NA       | ---                                       | Cluster0009_Low in some Paneth cells |
| 1441463_at   | NA       | ---                                       | Cluster0009_Low in some Paneth cells |
| 1442387_at   | NA       | ---                                       | Cluster0009_Low in some Paneth cells |
| 1442392_at   | NA       | ---                                       | Cluster0009_Low in some Paneth cells |
| 1442480_at   | NA       | ---                                       | Cluster0009_Low in some Paneth cells |
| 1442734_at   | NA       | ---                                       | Cluster0009_Low in some Paneth cells |
| 1442981_at   | NA       | ---                                       | Cluster0009_Low in some Paneth cells |
| 1443386_at   | NA       | ---                                       | Cluster0009_Low in some Paneth cells |
| 1443532_at   | NA       | ---                                       | Cluster0009_Low in some Paneth cells |
| 1443738_at   | NA       | ---                                       | Cluster0009_Low in some Paneth cells |
| 1444794_at   | NA       | ---                                       | Cluster0009_Low in some Paneth cells |
| 1444893_at   | NA       | ---                                       | Cluster0009_Low in some Paneth cells |
| 1444913_at   | NA       | ---                                       | Cluster0009_Low in some Paneth cells |
| 1444949_at   | NA       | ---                                       | Cluster0009_Low in some Paneth cells |
| 1445054_at   | NA       | ---                                       | Cluster0009_Low in some Paneth cells |
| 1445556_at   | NA       | ---                                       | Cluster0009_Low in some Paneth cells |
| 1445672_at   | NA       | ---                                       | Cluster0009_Low in some Paneth cells |
| 1445788_at   | NA       | ---                                       | Cluster0009_Low in some Paneth cells |
| 1445904_at   | NA       | ---                                       | Cluster0009_Low in some Paneth cells |
| 1446187_at   | NA       | ---                                       | Cluster0009_Low in some Paneth cells |
| 1446804_at   | NA       | ---                                       | Cluster0009_Low in some Paneth cells |
| 1446984_at   | NA       | ---                                       | Cluster0009_Low in some Paneth cells |
| 1446999_at   | NA       | ---                                       | Cluster0009_Low in some Paneth cells |
| 1447069_at   | NA       | ---                                       | Cluster0009_Low in some Paneth cells |
| 1447172_at   | NA       | ---                                       | Cluster0009_Low in some Paneth cells |
| 1447189_at   | NA       | ---                                       | Cluster0009_Low in some Paneth cells |
| 1447313_at   | NA       | ---                                       | Cluster0009_Low in some Paneth cells |
| 1447747_x_at | NA       | ---                                       | Cluster0009_Low in some Paneth cells |
| 1453615_at   | NA       | ---                                       | Cluster0009_Low in some Paneth cells |
| 1455670_at   | NA       | ---                                       | Cluster0009_Low in some Paneth cells |
| 1456921_at   | NA       | ---                                       | Cluster0009_Low in some Paneth cells |
| 1457223_at   | NA       | ---                                       | Cluster0009_Low in some Paneth cells |
| 1457234_at   | NA       | ---                                       | Cluster0009_Low in some Paneth cells |
| 1457251_x_at | NA       | ---                                       | Cluster0009_Low in some Paneth cells |
| 1457873_at   | NA       | ---                                       | Cluster0009_Low in some Paneth cells |
| 1458598_at   | NA       | ---                                       | Cluster0009_Low in some Paneth cells |
| 1458623_at   | NA       | ---                                       | Cluster0009_Low in some Paneth cells |
| 1458735_at   | NA       | ---                                       | Cluster0009_Low in some Paneth cells |
| 1458795_at   | NA       | ---                                       | Cluster0009_Low in some Paneth cells |
| 1458979_at   | NA       | ---                                       | Cluster0009_Low in some Paneth cells |
| 1459065_at   | NA       | ---                                       | Cluster0009_Low in some Paneth cells |
| 1422342_at   | Nmbr     | neuromedin B receptor                     | Cluster0009_Low in some Paneth cells |
| 1447650_at   | Nmd3     | NMD3 homolog (S. cerevisiae)              | Cluster0009_Low in some Paneth cells |
| 1450597_at   | Olfir870 | olfactory receptor 870                    | Cluster0009_Low in some Paneth cells |
| 1450341_at   | Pcdhb8   | protocadherin beta 8                      | Cluster0009_Low in some Paneth cells |
| 1438956_x_at | Pim3     | proviral integration site 3               | Cluster0009_Low in some Paneth cells |
| 1429309_at   | Prdm16   | PR domain containing 16                   | Cluster0009_Low in some Paneth cells |
| 1445474_at   | Prim2    | DNA primase, p58 subunit                  | Cluster0009_Low in some Paneth cells |
| 1432455_a_at | Prl8a1   | prolactin family 8, subfamily a, member 1 | Cluster0009_Low in some Paneth cells |
| 1452129_at   | Pth2r    | parathyroid hormone 2 receptor            | Cluster0009_Low in some Paneth cells |

|              |                  |                                                                                     |                                               |
|--------------|------------------|-------------------------------------------------------------------------------------|-----------------------------------------------|
| 1424035_at   | Rora             | RAR-related orphan receptor alpha                                                   | Cluster0009_Low in some Paneth cells          |
| 1433210_at   | Rptn             | repetin                                                                             | Cluster0009_Low in some Paneth cells          |
| 1425218_a_at | Scgb3a2          | secretoglobin, family 3A, member 2                                                  | Cluster0009_Low in some Paneth cells          |
| 1418813_at   | Serpina5         | serine (or cysteine) peptidase inhibitor, clade A, member 5                         | Cluster0009_Low in some Paneth cells          |
| 1444046_at   | Shisa7           | shisa homolog 7 (Xenopus laevis)                                                    | Cluster0009_Low in some Paneth cells          |
| 1449112_at   | Slc27a5          | solute carrier family 27 (fatty acid transporter), member 5                         | Cluster0009_Low in some Paneth cells          |
| 1453687_at   | Slc4a3           | solute carrier family 4 (anion exchanger), member 3                                 | Cluster0009_Low in some Paneth cells          |
| 1458441_at   | Slc6a17          | solute carrier family 6 (neurotransmitter transporter), member 17                   | Cluster0009_Low in some Paneth cells          |
| 1429874_at   | Spata17          | spermatogenesis associated 17                                                       | Cluster0009_Low in some Paneth cells          |
| 1458175_at   | Spon2            | spondin 2, extracellular matrix protein                                             | Cluster0009_Low in some Paneth cells          |
| 1449843_at   | St8sia2          | ST8 alpha-N-acetyl-neuraminidase alpha-2,8-sialyltransferase 2                      | Cluster0009_Low in some Paneth cells          |
| 1436782_at   | Svs3a /// Svs3b  | seminal vesicle secretory protein 3A /// seminal vesicle secretory protein 3B       | Cluster0009_Low in some Paneth cells          |
| 1420458_at   | Tac4             | tachykinin 4                                                                        | Cluster0009_Low in some Paneth cells          |
| 1448719_at   | Tada3            | transcriptional adaptor 3                                                           | Cluster0009_Low in some Paneth cells          |
| 1420423_at   | Tcl1b4           | T-cell leukemia/lymphoma 1B, 4                                                      | Cluster0009_Low in some Paneth cells          |
| 1430773_a_at | Tcte2            | t-complex-associated testis expressed 2                                             | Cluster0009_Low in some Paneth cells          |
| 1460683_at   | Tead4            | TEA domain family member 4                                                          | Cluster0009_Low in some Paneth cells          |
| 1441819_x_at | Timm50           | translocase of inner mitochondrial membrane 50 homolog (yeast)                      | Cluster0009_Low in some Paneth cells          |
| 1421626_at   | Tmc1             | transmembrane channel-like gene family 1                                            | Cluster0009_Low in some Paneth cells          |
| 1446460_at   | Tmem61           | transmembrane protein 61                                                            | Cluster0009_Low in some Paneth cells          |
| 1437004_at   | Trim43a          | tripartite motif-containing 43A                                                     | Cluster0009_Low in some Paneth cells          |
| 1450371_at   | Tshb             | thyroid stimulating hormone, beta subunit                                           | Cluster0009_Low in some Paneth cells          |
| 1428001_at   | Tshr             | thyroid stimulating hormone receptor                                                | Cluster0009_Low in some Paneth cells          |
| 1427636_at   | Tspy-ps          | testis specific protein-Y encoded, pseudogene                                       | Cluster0009_Low in some Paneth cells          |
| 1432045_at   | Tssk5            | testis-specific serine kinase 5                                                     | Cluster0009_Low in some Paneth cells          |
| 1446450_at   | Ttn              | Titin                                                                               | Cluster0009_Low in some Paneth cells          |
| 1437714_x_at | Usp14            | Ubiquitin specific peptidase 14                                                     | Cluster0009_Low in some Paneth cells          |
| 1421716_at   | Vmn1r65          | vomeroneasal 1 receptor 65                                                          | Cluster0009_Low in some Paneth cells          |
| 1453695_at   | Vmn1r90          | vomeroneasal 1 receptor 90                                                          | Cluster0009_Low in some Paneth cells          |
| 1443741_x_at | Whsc1            | Wolf-Hirschhorn syndrome candidate 1 (human)                                        | Cluster0009_Low in some Paneth cells          |
| 1446215_at   | Zfx2as           | zinc finger homeobox 2, antisense                                                   | Cluster0009_Low in some Paneth cells          |
| 1427796_at   | Zfp133           | zinc finger protein 133                                                             | Cluster0009_Low in some Paneth cells          |
| 1430562_at   | Zkscan5          | zinc finger with KRAB and SCAN domains 5                                            | Cluster0009_Low in some Paneth cells          |
| 1424904_at   | 1300010F03Rik    | RIKEN cDNA 1300010F03 gene                                                          | Cluster0010_Small and large intestine-related |
| 1455376_at   | 1300010F03Rik    | RIKEN cDNA 1300010F03 gene                                                          | Cluster0010_Small and large intestine-related |
| 1451381_at   | 1810020D17Rik    | RIKEN cDNA 1810020D17 gene                                                          | Cluster0010_Small and large intestine-related |
| 1424072_at   | 2010107G23Rik    | RIKEN cDNA 2010107G23 gene                                                          | Cluster0010_Small and large intestine-related |
| 1428400_at   | 2200002K05Rik    | RIKEN cDNA 2200002K05 gene                                                          | Cluster0010_Small and large intestine-related |
| 1428331_at   | 2210016F16Rik    | RIKEN cDNA 2210016F16 gene                                                          | Cluster0010_Small and large intestine-related |
| 1440916_at   | 2510049J12Rik    | RIKEN cDNA 2510049J12 gene                                                          | Cluster0010_Small and large intestine-related |
| 1450947_at   | 2610528J11Rik    | RIKEN cDNA 2610528J11 gene                                                          | Cluster0010_Small and large intestine-related |
| 1429089_s_at | 2900026A02Rik    | RIKEN cDNA 2900026A02 gene                                                          | Cluster0010_Small and large intestine-related |
| 1416607_at   | 4931406C07Rik    | RIKEN cDNA 4931406C07 gene                                                          | Cluster0010_Small and large intestine-related |
| 1454069_at   | 9030409C19Rik    | RIKEN cDNA 9030409C19 gene                                                          | Cluster0010_Small and large intestine-related |
| 1452081_a_at | 9130017N09Rik    | RIKEN cDNA 9130017N09 gene                                                          | Cluster0010_Small and large intestine-related |
| 1458210_at   | 9130404H23Rik    | RIKEN cDNA 9130404H23 gene                                                          | Cluster0010_Small and large intestine-related |
| 1460517_at   | 9130409J20Rik    | RIKEN cDNA 9130409J20 gene                                                          | Cluster0010_Small and large intestine-related |
| 1427957_at   | 9530008L14Rik    | RIKEN cDNA 9530008L14 gene                                                          | Cluster0010_Small and large intestine-related |
| 1428009_a_at | Abcc10           | ATP-binding cassette, sub-family C (CFTR/MRP), member 10                            | Cluster0010_Small and large intestine-related |
| 1416679_at   | Abcd3            | ATP-binding cassette, sub-family D (ALD), member 3                                  | Cluster0010_Small and large intestine-related |
| 1419103_a_at | Abhd6            | abhydrolase domain containing 6                                                     | Cluster0010_Small and large intestine-related |
| 1419104_at   | Abhd6            | abhydrolase domain containing 6                                                     | Cluster0010_Small and large intestine-related |
| 1424600_at   | Abp1             | amiloride binding protein 1 (amine oxidase, copper-containing)                      | Cluster0010_Small and large intestine-related |
| 1433545_s_at | Acad11 /// Nphp3 | acyl-Coenzyme A dehydrogenase family, member 11 /// nephronophthisis 3 (adolescent) | Cluster0010_Small and large intestine-related |
| 1416408_at   | Acox1            | acyl-Coenzyme A oxidase 1, palmitoyl                                                | Cluster0010_Small and large intestine-related |
| 1416409_at   | Acox1            | acyl-Coenzyme A oxidase 1, palmitoyl                                                | Cluster0010_Small and large intestine-related |
| 1436753_at   | Adck5            | aarF domain containing kinase 5                                                     | Cluster0010_Small and large intestine-related |

|              |                    |                                                                                                           |                                               |
|--------------|--------------------|-----------------------------------------------------------------------------------------------------------|-----------------------------------------------|
| 1425163_at   | Al661453           | expressed sequence Al661453                                                                               | Cluster0010_Small and large intestine-related |
| 1433905_at   | Akap7              | A kinase (PRKA) anchor protein 7                                                                          | Cluster0010_Small and large intestine-related |
| 1446483_at   | Akr1e1             | aldo-keto reductase family 1, member E1                                                                   | Cluster0010_Small and large intestine-related |
| 1416468_at   | Aldh1a1            | aldehyde dehydrogenase family 1, subfamily A1                                                             | Cluster0010_Small and large intestine-related |
| 1453042_at   | Anks4b             | ankyrin repeat and sterile alpha motif domain containing 4B                                               | Cluster0010_Small and large intestine-related |
| 1424979_at   | Aph1a              | anterior pharynx defective 1a homolog (C. elegans)                                                        | Cluster0010_Small and large intestine-related |
| 1434926_at   | Arhgef11           | Rho guanine nucleotide exchange factor (GEF) 11                                                           | Cluster0010_Small and large intestine-related |
| 1427386_at   | Arhgef16           | Rho guanine nucleotide exchange factor (GEF) 16                                                           | Cluster0010_Small and large intestine-related |
| 1452304_a_at | Arhgef5            | Rho guanine nucleotide exchange factor (GEF) 5                                                            | Cluster0010_Small and large intestine-related |
| 1433918_at   | Atg4d              | autophagy-related 4D (yeast)                                                                              | Cluster0010_Small and large intestine-related |
| 1423890_x_at | Atp1b1             | ATPase, Na+/K+ transporting, beta 1 polypeptide                                                           | Cluster0010_Small and large intestine-related |
| 1451152_a_at | Atp1b1             | ATPase, Na+/K+ transporting, beta 1 polypeptide                                                           | Cluster0010_Small and large intestine-related |
| 1434791_at   | Atp6v0a2           | ATPase, H+ transporting, lysosomal V0 subunit A2                                                          | Cluster0010_Small and large intestine-related |
| 1457752_at   | AU014876           | expressed sequence AU014876                                                                               | Cluster0010_Small and large intestine-related |
| 1433712_at   | AW555464           | expressed sequence AW555464                                                                               | Cluster0010_Small and large intestine-related |
| 1436195_at   | BC046404           | cDNA sequence BC046404                                                                                    | Cluster0010_Small and large intestine-related |
| 1434645_at   | C530008M17Rik      | RIKEN cDNA C530008M17 gene                                                                                | Cluster0010_Small and large intestine-related |
| 1424713_at   | Calm14             | calmodulin-like 4                                                                                         | Cluster0010_Small and large intestine-related |
| 1459054_at   | Cas21              | castor homolog 1, zinc finger (Drosophila)                                                                | Cluster0010_Small and large intestine-related |
| 1453166_at   | Ccdc109a           | coiled-coil domain containing 109A                                                                        | Cluster0010_Small and large intestine-related |
| 1439109_at   | Ccdc68             | coiled-coil domain containing 68                                                                          | Cluster0010_Small and large intestine-related |
| 1416488_at   | Ccng2              | cyclin G2                                                                                                 | Cluster0010_Small and large intestine-related |
| 1419331_at   | Cdh17              | cadherin 17                                                                                               | Cluster0010_Small and large intestine-related |
| 1426014_a_at | Cdhr5              | cadherin-related family member 5                                                                          | Cluster0010_Small and large intestine-related |
| 1428680_at   | Cds1               | CDP-diacylglycerol synthase 1                                                                             | Cluster0010_Small and large intestine-related |
| 1456114_at   | Cds1               | CDP-diacylglycerol synthase 1                                                                             | Cluster0010_Small and large intestine-related |
| 1424245_at   | Ces2 /// Gm9756    | carboxylesterase 2 /// predicted gene 9756                                                                | Cluster0010_Small and large intestine-related |
| 1420517_at   | Chmp4c             | chromatin modifying protein 4C                                                                            | Cluster0010_Small and large intestine-related |
| 1431176_at   | Chmp4c             | chromatin modifying protein 4C                                                                            | Cluster0010_Small and large intestine-related |
| 1417089_a_at | Ckmt1              | creatine kinase, mitochondrial 1, ubiquitous                                                              | Cluster0010_Small and large intestine-related |
| 1424673_at   | Clec2h             | C-type lectin domain family 2, member h                                                                   | Cluster0010_Small and large intestine-related |
| 1431240_at   | Clec2h             | C-type lectin domain family 2, member h                                                                   | Cluster0010_Small and large intestine-related |
| 1434345_at   | Clrn3              | clarin 3                                                                                                  | Cluster0010_Small and large intestine-related |
| 1447112_s_at | Cryl1              | crystallin, lambda 1                                                                                      | Cluster0010_Small and large intestine-related |
| 1429994_s_at | Cyp2c65            | cytochrome P450, family 2, subfamily c, polypeptide 65                                                    | Cluster0010_Small and large intestine-related |
| 1416194_at   | Cyp4b1             | cytochrome P450, family 4, subfamily b, polypeptide 1                                                     | Cluster0010_Small and large intestine-related |
| 1449291_a_at | Dcbld1             | discoidin, CUB and LCCL domain containing 1                                                               | Cluster0010_Small and large intestine-related |
| 1449443_at   | Decr1              | 2,4-dienoyl CoA reductase 1, mitochondrial                                                                | Cluster0010_Small and large intestine-related |
| 1424549_at   | Degs2              | degenerative spermatocyte homolog 2 (Drosophila), lipid desaturase                                        | Cluster0010_Small and large intestine-related |
| 1428072_a_at | Dolpp1             | dolichyl pyrophosphate phosphatase 1                                                                      | Cluster0010_Small and large intestine-related |
| 1417382_at   | Entpd5             | ectonucleoside triphosphate diphosphohydrolase 5                                                          | Cluster0010_Small and large intestine-related |
| 1417384_at   | Entpd5             | ectonucleoside triphosphate diphosphohydrolase 5                                                          | Cluster0010_Small and large intestine-related |
| 1433763_at   | Entpd5             | ectonucleoside triphosphate diphosphohydrolase 5                                                          | Cluster0010_Small and large intestine-related |
| 1451765_a_at | Entpd5             | ectonucleoside triphosphate diphosphohydrolase 5                                                          | Cluster0010_Small and large intestine-related |
| 1418294_at   | Epb4.114b          | erythrocyte protein band 4.1-like 4b                                                                      | Cluster0010_Small and large intestine-related |
| 1422824_s_at | Eps8               | epidermal growth factor receptor pathway substrate 8                                                      | Cluster0010_Small and large intestine-related |
| 1422823_at   | Eps8 /// LOC632638 | epidermal growth factor receptor pathway substrate 8 /// similar to Epidermal growth factor receptor kina | Cluster0010_Small and large intestine-related |
| 1435797_at   | Ept1               | ethanolaminophosphotransferase 1 (CDP-ethanolamine-specific)                                              | Cluster0010_Small and large intestine-related |
| 1434606_at   | Erbb3              | v-erb-b2 erythroblastic leukemia viral oncogene homolog 3 (avian)                                         | Cluster0010_Small and large intestine-related |
| 1435223_at   | Erlin2             | ER lipid raft associated 2                                                                                | Cluster0010_Small and large intestine-related |
| 1441214_at   | Exp5               | exophilin 5                                                                                               | Cluster0010_Small and large intestine-related |
| 1425122_at   | Fam3b              | family with sequence similarity 3, member B                                                               | Cluster0010_Small and large intestine-related |
| 1451143_at   | Fam98c             | family with sequence similarity 98, member C                                                              | Cluster0010_Small and large intestine-related |
| 1417535_at   | Fbxo25             | F-box protein 25                                                                                          | Cluster0010_Small and large intestine-related |
| 1439397_at   | Fmn1               | formin 1                                                                                                  | Cluster0010_Small and large intestine-related |
| 1421362_a_at | Frk                | fyn-related kinase                                                                                        | Cluster0010_Small and large intestine-related |
| 1424076_at   | Gdpd1              | glycerophosphodiester phosphodiesterase domain containing 1                                               | Cluster0010_Small and large intestine-related |

|              |                   |                                                                  |                                               |
|--------------|-------------------|------------------------------------------------------------------|-----------------------------------------------|
| 1424077_at   | Gdpd1             | glycerophosphodiester phosphodiesterase domain containing 1      | Cluster0010_Small and large intestine-related |
| 1417178_at   | Gipc2             | GIPC PDZ domain containing family, member 2                      | Cluster0010_Small and large intestine-related |
| 1455455_at   | Glt28d2           | glycosyltransferase 28 domain containing 2                       | Cluster0010_Small and large intestine-related |
| 1437361_at   | Gm11545           | predicted gene 11545                                             | Cluster0010_Small and large intestine-related |
| 1425020_at   | Gm6245 /// Ubxn2a | predicted gene 6245 /// UBX domain protein 2A                    | Cluster0010_Small and large intestine-related |
| 1434254_at   | Gna11             | guanine nucleotide binding protein, alpha 11                     | Cluster0010_Small and large intestine-related |
| 1424696_at   | Gpr89             | G protein-coupled receptor 89                                    | Cluster0010_Small and large intestine-related |
| 1448227_at   | Grb7              | growth factor receptor bound protein 7                           | Cluster0010_Small and large intestine-related |
| 1425891_a_at | Grtp1             | GH regulated TBC protein 1                                       | Cluster0010_Small and large intestine-related |
| 1448273_at   | Gss               | glutathione synthetase                                           | Cluster0010_Small and large intestine-related |
| 1452823_at   | Gstk1             | glutathione S-transferase kappa 1                                | Cluster0010_Small and large intestine-related |
| 1455972_x_at | Hadh              | hydroxyacyl-Coenzyme A dehydrogenase                             | Cluster0010_Small and large intestine-related |
| 1423913_at   | Hectd3            | HECT domain containing 3                                         | Cluster0010_Small and large intestine-related |
| 1448696_at   | Heph              | hephaestin                                                       | Cluster0010_Small and large intestine-related |
| 1419905_s_at | Hpgd              | hydroxyprostaglandin dehydrogenase 15 (NAD)                      | Cluster0010_Small and large intestine-related |
| 1419906_at   | Hpgd              | Hydroxyprostaglandin dehydrogenase 15 (NAD)                      | Cluster0010_Small and large intestine-related |
| 1434642_at   | Hsd17b11          | hydroxysteroid (17-beta) dehydrogenase 11                        | Cluster0010_Small and large intestine-related |
| 1419671_a_at | Il17rc            | interleukin 17 receptor C                                        | Cluster0010_Small and large intestine-related |
| 1418983_at   | Inadl             | InaD-like (Drosophila)                                           | Cluster0010_Small and large intestine-related |
| 1459894_at   | Iqgap2            | IQ motif containing GTPase activating protein 2                  | Cluster0010_Small and large intestine-related |
| 1426733_at   | Itpk1             | inositol 1,3,4-triphosphate 5/6 kinase                           | Cluster0010_Small and large intestine-related |
| 1454755_at   | Itpkc             | inositol 1,4,5-trisphosphate 3-kinase C                          | Cluster0010_Small and large intestine-related |
| 1429796_at   | Kalrn             | kalirin, RhoGEF kinase                                           | Cluster0010_Small and large intestine-related |
| 1426284_at   | Krt20             | keratin 20                                                       | Cluster0010_Small and large intestine-related |
| 1455497_at   | Leng9             | leukocyte receptor cluster (LRC) member 9                        | Cluster0010_Small and large intestine-related |
| 1456619_at   | Liph              | lipase, member H                                                 | Cluster0010_Small and large intestine-related |
| 1457026_at   | Liph              | lipase, member H                                                 | Cluster0010_Small and large intestine-related |
| 1455056_at   | Lmo7              | LIM domain only 7                                                | Cluster0010_Small and large intestine-related |
| 1455018_at   | Lmtk2             | lemur tyrosine kinase 2                                          | Cluster0010_Small and large intestine-related |
| 1455825_s_at | Lnx1              | ligand of numb-protein X 1                                       | Cluster0010_Small and large intestine-related |
| 1434915_s_at | Lrrc19            | leucine rich repeat containing 19                                | Cluster0010_Small and large intestine-related |
| 1444019_at   | Lrrc19            | leucine rich repeat containing 19                                | Cluster0010_Small and large intestine-related |
| 1442096_at   | Lrrc66            | leucine rich repeat containing 66                                | Cluster0010_Small and large intestine-related |
| 1428667_at   | Maoa              | monoamine oxidase A                                              | Cluster0010_Small and large intestine-related |
| 1460619_at   | Mfsd9             | major facilitator superfamily domain containing 9                | Cluster0010_Small and large intestine-related |
| 1428801_at   | Mgat3             | mannoside acetylglucosaminyltransferase 3                        | Cluster0010_Small and large intestine-related |
| 1452592_at   | Mgst2             | microsomal glutathione S-transferase 2                           | Cluster0010_Small and large intestine-related |
| 1418437_a_at | Mlx               | MAX-like protein X                                               | Cluster0010_Small and large intestine-related |
| 1434954_at   | Mpp5              | membrane protein, palmitoylated 5 (MAGUK p55 subfamily member 5) | Cluster0010_Small and large intestine-related |
| 1421836_at   | Mtap7             | microtubule-associated protein 7                                 | Cluster0010_Small and large intestine-related |
| 1438843_x_at | Mtch2             | mitochondrial carrier homolog 2 (C. elegans)                     | Cluster0010_Small and large intestine-related |
| 1448654_at   | Mtch2             | mitochondrial carrier homolog 2 (C. elegans)                     | Cluster0010_Small and large intestine-related |
| 1419386_at   | Muc13             | mucin 13, epithelial transmembrane                               | Cluster0010_Small and large intestine-related |
| 1419387_s_at | Muc13             | mucin 13, epithelial transmembrane                               | Cluster0010_Small and large intestine-related |
| 1448618_at   | Mvp               | major vault protein                                              | Cluster0010_Small and large intestine-related |
| 1434830_at   | Mxd1              | MAX dimerization protein 1                                       | Cluster0010_Small and large intestine-related |
| 1428835_at   | Myh14             | myosin, heavy polypeptide 14                                     | Cluster0010_Small and large intestine-related |
| 1435979_a_at | Myo15b            | myosin XVB                                                       | Cluster0010_Small and large intestine-related |
| 1452298_a_at | Myo5b             | myosin VB                                                        | Cluster0010_Small and large intestine-related |
| 1436630_at   | NA                | ---                                                              | Cluster0010_Small and large intestine-related |
| 1439526_at   | NA                | ---                                                              | Cluster0010_Small and large intestine-related |
| 1444479_at   | NA                | ---                                                              | Cluster0010_Small and large intestine-related |
| 1455411_at   | NA                | ---                                                              | Cluster0010_Small and large intestine-related |
| 1457384_at   | NA                | ---                                                              | Cluster0010_Small and large intestine-related |
| 1458619_at   | NA                | ---                                                              | Cluster0010_Small and large intestine-related |
| 1460118_at   | NA                | ---                                                              | Cluster0010_Small and large intestine-related |
| 1449981_a_at | Nat2              | N-acetyltransferase 2 (arylamine N-acetyltransferase)            | Cluster0010_Small and large intestine-related |

|              |          |                                                                                                    |                                               |
|--------------|----------|----------------------------------------------------------------------------------------------------|-----------------------------------------------|
| 1452066_a_at | Ndfip2   | Nedd4 family interacting protein 2                                                                 | Cluster0010_Small and large intestine-related |
| 1418947_at   | Nek3     | NIMA (never in mitosis gene a)-related expressed kinase 3                                          | Cluster0010_Small and large intestine-related |
| 1426934_at   | Nhs1l    | NHS-like 1                                                                                         | Cluster0010_Small and large intestine-related |
| 1441075_at   | Nostrin  | nitric oxide synthase trafficker                                                                   | Cluster0010_Small and large intestine-related |
| 1435917_at   | Ociad2   | OClA domain containing 2                                                                           | Cluster0010_Small and large intestine-related |
| 1428548_at   | Pak4     | p21 protein (Cdc42/Rac)-activated kinase 4                                                         | Cluster0010_Small and large intestine-related |
| 1433613_at   | Pank3    | pantothenate kinase 3                                                                              | Cluster0010_Small and large intestine-related |
| 1423175_s_at | Pard6b   | par-6 (partitioning defective 6) homolog beta (C. elegans)                                         | Cluster0010_Small and large intestine-related |
| 1452475_at   | Pcsk5    | proprotein convertase subtilisin/kexin type 5                                                      | Cluster0010_Small and large intestine-related |
| 1417602_at   | Per2     | period homolog 2 (Drosophila)                                                                      | Cluster0010_Small and large intestine-related |
| 1450389_s_at | Pip5k1b  | phosphatidylinositol-4-phosphate 5-kinase, type 1 beta                                             | Cluster0010_Small and large intestine-related |
| 1437113_s_at | Pld1     | phospholipase D1                                                                                   | Cluster0010_Small and large intestine-related |
| 1449424_at   | Plek2    | pleckstrin 2                                                                                       | Cluster0010_Small and large intestine-related |
| 1434889_at   | Plekha7  | pleckstrin homology domain containing, family A member 7                                           | Cluster0010_Small and large intestine-related |
| 1436128_at   | Plekha8  | pleckstrin homology domain containing, family A (phosphoinositide binding specific) member 8       | Cluster0010_Small and large intestine-related |
| 1452517_at   | Plekhh1  | pleckstrin homology domain containing, family H (with MyTH4 domain) member 1                       | Cluster0010_Small and large intestine-related |
| 1428345_at   | Ppapdc2  | phosphatidic acid phosphatase type 2 domain containing 2                                           | Cluster0010_Small and large intestine-related |
| 1457721_at   | Ppara    | peroxisome proliferator activated receptor alpha                                                   | Cluster0010_Small and large intestine-related |
| 1434100_x_at | Ppargc1a | peroxisome proliferative activated receptor, gamma, coactivator 1 alpha                            | Cluster0010_Small and large intestine-related |
| 1437751_at   | Ppargc1a | peroxisome proliferative activated receptor, gamma, coactivator 1 alpha                            | Cluster0010_Small and large intestine-related |
| 1460584_at   | Ppip5k1  | diphosphoinositol pentakisphosphate kinase 1                                                       | Cluster0010_Small and large intestine-related |
| 1415678_at   | Ppm1a    | protein phosphatase 1A, magnesium dependent, alpha isoform                                         | Cluster0010_Small and large intestine-related |
| 1418085_at   | Prkcz    | protein kinase C, zeta                                                                             | Cluster0010_Small and large intestine-related |
| 1433503_at   | Ptgr2    | prostaglandin reductase 2                                                                          | Cluster0010_Small and large intestine-related |
| 1420842_at   | Ptprf    | protein tyrosine phosphatase, receptor type, F                                                     | Cluster0010_Small and large intestine-related |
| 1420843_at   | Ptprf    | protein tyrosine phosphatase, receptor type, F                                                     | Cluster0010_Small and large intestine-related |
| 1426047_a_at | Ptprr    | protein tyrosine phosphatase, receptor type, R                                                     | Cluster0010_Small and large intestine-related |
| 1448673_at   | Pvrl3    | poliovirus receptor-related 3                                                                      | Cluster0010_Small and large intestine-related |
| 1422178_a_at | Rab17    | RAB17, member RAS oncogene family                                                                  | Cluster0010_Small and large intestine-related |
| 1434302_at   | Raph1    | Ras association (RalGDS/AF-6) and pleckstrin homology domains 1                                    | Cluster0010_Small and large intestine-related |
| 1423411_at   | Rbm47    | RNA binding motif protein 47                                                                       | Cluster0010_Small and large intestine-related |
| 1438021_at   | Rbm47    | RNA binding motif protein 47                                                                       | Cluster0010_Small and large intestine-related |
| 1415737_at   | Rfk      | riboflavin kinase                                                                                  | Cluster0010_Small and large intestine-related |
| 1457696_at   | Rilp     | Rab interacting lysosomal protein                                                                  | Cluster0010_Small and large intestine-related |
| 1434956_at   | Rnf170   | ring finger protein 170                                                                            | Cluster0010_Small and large intestine-related |
| 1424794_at   | Rnf186   | ring finger protein 186                                                                            | Cluster0010_Small and large intestine-related |
| 1457926_at   | Rnpepl1  | arginyl aminopeptidase (aminopeptidase B)-like 1                                                   | Cluster0010_Small and large intestine-related |
| 1425793_a_at | Rorc     | RAR-related orphan receptor gamma                                                                  | Cluster0010_Small and large intestine-related |
| 1452227_at   | Sel1l3   | sel-1 suppressor of lin-12-like 3 (C. elegans)                                                     | Cluster0010_Small and large intestine-related |
| 1448110_at   | Sema4a   | sema domain, immunoglobulin domain (Ig), transmembrane domain (TM) and short cytoplasmic domain, ( | Cluster0010_Small and large intestine-related |
| 1417809_at   | Slc22a18 | solute carrier family 22 (organic cation transporter), member 18                                   | Cluster0010_Small and large intestine-related |
| 1450395_at   | Slc22a5  | solute carrier family 22 (organic cation transporter), member 5                                    | Cluster0010_Small and large intestine-related |
| 1455506_at   | Slc25a34 | solute carrier family 25, member 34                                                                | Cluster0010_Small and large intestine-related |
| 1451139_at   | Slc39a4  | solute carrier family 39 (zinc transporter), member 4                                              | Cluster0010_Small and large intestine-related |
| 1452765_at   | Slc39a9  | solute carrier family 39 (zinc transporter), member 9                                              | Cluster0010_Small and large intestine-related |
| 1421225_a_at | Slc4a4   | solute carrier family 4 (anion exchanger), member 4                                                | Cluster0010_Small and large intestine-related |
| 1450982_at   | Slc9a3r1 | solute carrier family 9 (sodium/hydrogen exchanger), member 3 regulator 1                          | Cluster0010_Small and large intestine-related |
| 1450191_a_at | Sox13    | SRY-box containing gene 13                                                                         | Cluster0010_Small and large intestine-related |
| 1416627_at   | Spint1   | serine protease inhibitor, Kunitz type 1                                                           | Cluster0010_Small and large intestine-related |
| 1425118_at   | Spire2   | spire homolog 2 (Drosophila)                                                                       | Cluster0010_Small and large intestine-related |
| 1423240_at   | Src      | Rous sarcoma oncogene                                                                              | Cluster0010_Small and large intestine-related |
| 1450918_s_at | Src      | Rous sarcoma oncogene                                                                              | Cluster0010_Small and large intestine-related |
| 1418076_at   | St14     | suppression of tumorigenicity 14 (colon carcinoma)                                                 | Cluster0010_Small and large intestine-related |
| 1418138_at   | Sult1d1  | sulfotransferase family 1D, member 1                                                               | Cluster0010_Small and large intestine-related |
| 1448973_at   | Sult1d1  | sulfotransferase family 1D, member 1                                                               | Cluster0010_Small and large intestine-related |
| 1426546_at   | Tesk2    | testis-specific kinase 2                                                                           | Cluster0010_Small and large intestine-related |
| 1417370_at   | Tff3     | trefoil factor 3, intestinal                                                                       | Cluster0010_Small and large intestine-related |

|              |                                          |                                                                                                           |                                               |
|--------------|------------------------------------------|-----------------------------------------------------------------------------------------------------------|-----------------------------------------------|
| 1421943_at   | Tgfa                                     | transforming growth factor alpha                                                                          | Cluster0010_Small and large intestine-related |
| 1419314_at   | Tinag                                    | tubulointerstitial nephritis antigen                                                                      | Cluster0010_Small and large intestine-related |
| 1417162_at   | Tmbim1                                   | transmembrane BAX inhibitor motif containing 1                                                            | Cluster0010_Small and large intestine-related |
| 1451586_at   | Tmbim6                                   | transmembrane BAX inhibitor motif containing 6                                                            | Cluster0010_Small and large intestine-related |
| 1452934_at   | Tmc5                                     | transmembrane channel-like gene family 5                                                                  | Cluster0010_Small and large intestine-related |
| 1453318_at   | Tmem102                                  | transmembrane protein 102                                                                                 | Cluster0010_Small and large intestine-related |
| 1434094_at   | Tmem125                                  | transmembrane protein 125                                                                                 | Cluster0010_Small and large intestine-related |
| 1417199_at   | Tmem183a                                 | transmembrane protein 183A                                                                                | Cluster0010_Small and large intestine-related |
| 1417200_at   | Tmem183a                                 | transmembrane protein 183A                                                                                | Cluster0010_Small and large intestine-related |
| 1417895_a_at | Tmem54                                   | transmembrane protein 54                                                                                  | Cluster0010_Small and large intestine-related |
| 1433740_at   | Tmem87b                                  | transmembrane protein 87B                                                                                 | Cluster0010_Small and large intestine-related |
| 1435526_at   | Tor1aip2                                 | torsin A interacting protein 2                                                                            | Cluster0010_Small and large intestine-related |
| 1425388_a_at | Tpk1                                     | thiamine pyrophosphokinase                                                                                | Cluster0010_Small and large intestine-related |
| 1452622_a_at | Tradd                                    | TNFRSF1A-associated via death domain                                                                      | Cluster0010_Small and large intestine-related |
| 1435549_at   | Trpm4                                    | transient receptor potential cation channel, subfamily M, member 4                                        | Cluster0010_Small and large intestine-related |
| 1416308_at   | Ugdh                                     | UDP-glucose dehydrogenase                                                                                 | Cluster0010_Small and large intestine-related |
| 1424783_a_at | Ugt1a1 /// Ugt1a10 /// Ugt1a2 /// Ugt1a5 | UDP glucuronosyltransferase 1 family, polypeptide A1 /// UDP glycosyltransferase 1 family, polypeptide A1 | Cluster0010_Small and large intestine-related |
| 1426260_a_at | Ugt1a1 /// Ugt1a10 /// Ugt1a2 /// Ugt1a5 | UDP glucuronosyltransferase 1 family, polypeptide A1 /// UDP glycosyltransferase 1 family, polypeptide A1 | Cluster0010_Small and large intestine-related |
| 1426261_s_at | Ugt1a1 /// Ugt1a10 /// Ugt1a2 /// Ugt1a5 | UDP glucuronosyltransferase 1 family, polypeptide A1 /// UDP glycosyltransferase 1 family, polypeptide A1 | Cluster0010_Small and large intestine-related |
| 1427961_s_at | Ugt2b34                                  | UDP glucuronosyltransferase 2 family, polypeptide B34                                                     | Cluster0010_Small and large intestine-related |
| 1418175_at   | Vdr                                      | vitamin D receptor                                                                                        | Cluster0010_Small and large intestine-related |
| 1418176_at   | Vdr                                      | vitamin D receptor                                                                                        | Cluster0010_Small and large intestine-related |
| 1455071_at   | Zbtb7b                                   | zinc finger and BTB domain containing 7B                                                                  | Cluster0010_Small and large intestine-related |
| 1434137_x_at | Zg16                                     | zymogen granule protein 16                                                                                | Cluster0010_Small and large intestine-related |
| 1434192_at   | Zze1                                     | zinc finger, ZZ-type with EF hand domain 1                                                                | Cluster0010_Small and large intestine-related |
| 1433767_at   | 1110018G07Rik                            | RIKEN cDNA 1110018G07 gene                                                                                | Cluster0011_Phagocyte-related                 |
| 1454721_at   | 1110018G07Rik                            | RIKEN cDNA 1110018G07 gene                                                                                | Cluster0011_Phagocyte-related                 |
| 1430715_at   | 2310014L17Rik                            | RIKEN cDNA 2310014L17 gene                                                                                | Cluster0011_Phagocyte-related                 |
| 1435572_at   | 2310014L17Rik                            | RIKEN cDNA 2310014L17 gene                                                                                | Cluster0011_Phagocyte-related                 |
| 1426356_at   | 6330578E17Rik                            | RIKEN cDNA 6330578E17 gene                                                                                | Cluster0011_Phagocyte-related                 |
| 1455263_at   | 9030625A04Rik                            | RIKEN cDNA 9030625A04 gene                                                                                | Cluster0011_Phagocyte-related                 |
| 1448583_at   | AA960436                                 | expressed sequence AA960436                                                                               | Cluster0011_Phagocyte-related                 |
| 1427519_at   | Adora2a                                  | adenosine A2a receptor                                                                                    | Cluster0011_Phagocyte-related                 |
| 1460710_at   | Adora2a                                  | adenosine A2a receptor                                                                                    | Cluster0011_Phagocyte-related                 |
| 1426862_at   | Aftph                                    | aftiphilin                                                                                                | Cluster0011_Phagocyte-related                 |
| 1440914_s_at | Aftph                                    | aftiphilin                                                                                                | Cluster0011_Phagocyte-related                 |
| 1457300_at   | Aftph                                    | aftiphilin                                                                                                | Cluster0011_Phagocyte-related                 |
| 1422965_at   | Agtrap                                   | angiotensin II, type I receptor-associated protein                                                        | Cluster0011_Phagocyte-related                 |
| 1435665_at   | Al451617                                 | expressed sequence Al451617                                                                               | Cluster0011_Phagocyte-related                 |
| 1438716_at   | Al451617                                 | expressed sequence Al451617                                                                               | Cluster0011_Phagocyte-related                 |
| 1456494_a_at | Al451617 /// Trim30                      | expressed sequence Al451617 /// tripartite motif-containing 30                                            | Cluster0011_Phagocyte-related                 |
| 1451340_at   | Arid5a                                   | AT rich interactive domain 5A (MRF1-like)                                                                 | Cluster0011_Phagocyte-related                 |
| 1419004_s_at | Bcl2a1a /// Bcl2a1b /// Bcl2a1d          | B-cell leukemia/lymphoma 2 related protein A1a /// B-cell leukemia/lymphoma 2 related protein A1b /// B-  | Cluster0011_Phagocyte-related                 |
| 1424921_at   | Bst2                                     | bone marrow stromal cell antigen 2                                                                        | Cluster0011_Phagocyte-related                 |
| 1443414_at   | C78513                                   | EST C78513                                                                                                | Cluster0011_Phagocyte-related                 |
| 1421307_at   | Car13                                    | carbonic anhydrase 13                                                                                     | Cluster0011_Phagocyte-related                 |
| 1421308_at   | Car13                                    | carbonic anhydrase 13                                                                                     | Cluster0011_Phagocyte-related                 |
| 1439620_at   | Car13                                    | carbonic anhydrase 13                                                                                     | Cluster0011_Phagocyte-related                 |
| 1449591_at   | Casp4                                    | caspase 4, apoptosis-related cysteine peptidase                                                           | Cluster0011_Phagocyte-related                 |
| 1420380_at   | Ccl2                                     | chemokine (C-C motif) ligand 2                                                                            | Cluster0011_Phagocyte-related                 |
| 1419561_at   | Ccl3                                     | chemokine (C-C motif) ligand 3                                                                            | Cluster0011_Phagocyte-related                 |
| 1419714_at   | Cd274                                    | CD274 antigen                                                                                             | Cluster0011_Phagocyte-related                 |
| 1439221_s_at | Cd40                                     | CD40 antigen                                                                                              | Cluster0011_Phagocyte-related                 |
| 1449473_s_at | Cd40                                     | CD40 antigen                                                                                              | Cluster0011_Phagocyte-related                 |
| 1460415_a_at | Cd40                                     | CD40 antigen                                                                                              | Cluster0011_Phagocyte-related                 |
| 1418901_at   | Cebpb                                    | CCAAT/enhancer binding protein (C/EBP), beta                                                              | Cluster0011_Phagocyte-related                 |
| 1427844_a_at | Cebpb                                    | CCAAT/enhancer binding protein (C/EBP), beta                                                              | Cluster0011_Phagocyte-related                 |

|              |                                            |                                                                                                              |                               |
|--------------|--------------------------------------------|--------------------------------------------------------------------------------------------------------------|-------------------------------|
| 1424996_at   | Cflar                                      | CASP8 and FADD-like apoptosis regulator                                                                      | Cluster0011_Phagocyte-related |
| 1425686_at   | Cflar                                      | CASP8 and FADD-like apoptosis regulator                                                                      | Cluster0011_Phagocyte-related |
| 1425687_at   | Cflar                                      | CASP8 and FADD-like apoptosis regulator                                                                      | Cluster0011_Phagocyte-related |
| 1449317_at   | Cflar /// Gm9845                           | CASP8 and FADD-like apoptosis regulator /// CASP8 and FADD-like apoptosis regulator pseudogene               | Cluster0011_Phagocyte-related |
| 1426240_at   | Chmp4b /// LOC674706                       | chromatin modifying protein 4B /// similar to zinc finger protein 341                                        | Cluster0011_Phagocyte-related |
| 1425821_at   | Clcn7                                      | chloride channel 7                                                                                           | Cluster0011_Phagocyte-related |
| 1420330_at   | Clec4e                                     | C-type lectin domain family 4, member e                                                                      | Cluster0011_Phagocyte-related |
| 1420331_at   | Clec4e                                     | C-type lectin domain family 4, member e                                                                      | Cluster0011_Phagocyte-related |
| 1422095_a_at | Cmpk2                                      | cytidine monophosphate (UMP-CMP) kinase 2, mitochondrial                                                     | Cluster0011_Phagocyte-related |
| 1450484_a_at | Cmpk2                                      | cytidine monophosphate (UMP-CMP) kinase 2, mitochondrial                                                     | Cluster0011_Phagocyte-related |
| 1418930_at   | Cxcl10                                     | chemokine (C-X-C motif) ligand 10                                                                            | Cluster0011_Phagocyte-related |
| 1438148_at   | Cxcl3                                      | chemokine (C-X-C motif) ligand 3                                                                             | Cluster0011_Phagocyte-related |
| 1422978_at   | Cybb                                       | cytochrome b-245, beta polypeptide                                                                           | Cluster0011_Phagocyte-related |
| 1436778_at   | Cybb                                       | cytochrome b-245, beta polypeptide                                                                           | Cluster0011_Phagocyte-related |
| 1436779_at   | Cybb                                       | cytochrome b-245, beta polypeptide                                                                           | Cluster0011_Phagocyte-related |
| 1438868_at   | D14Erttd668e                               | DNA segment, Chr 14, ERATO Doi 668, expressed                                                                | Cluster0011_Phagocyte-related |
| 1419026_at   | Daxx                                       | Fas death domain-associated protein                                                                          | Cluster0011_Phagocyte-related |
| 1430150_at   | Dcp2                                       | DCP2 decapping enzyme homolog ( <i>S. cerevisiae</i> )                                                       | Cluster0011_Phagocyte-related |
| 1427289_at   | Ddhd1                                      | DDHD domain containing 1                                                                                     | Cluster0011_Phagocyte-related |
| 1454070_a_at | Ddhd1                                      | DDHD domain containing 1                                                                                     | Cluster0011_Phagocyte-related |
| 1447789_x_at | Ddx6                                       | DEAD (Asp-Glu-Ala-Asp) box polypeptide 6                                                                     | Cluster0011_Phagocyte-related |
| 1420768_a_at | Dhx58                                      | DEXH (Asp-Glu-X-His) box polypeptide 58                                                                      | Cluster0011_Phagocyte-related |
| 1451426_at   | Dhx58                                      | DEXH (Asp-Glu-X-His) box polypeptide 58                                                                      | Cluster0011_Phagocyte-related |
| 1424524_at   | Dram1                                      | DNA-damage regulated autophagy modulator 1                                                                   | Cluster0011_Phagocyte-related |
| 1444405_at   | E030037K03Rik                              | RIKEN cDNA E030037K03 gene                                                                                   | Cluster0011_Phagocyte-related |
| 1422005_at   | Eif2ak2                                    | eukaryotic translation initiation factor 2-alpha kinase 2                                                    | Cluster0011_Phagocyte-related |
| 1422006_at   | Eif2ak2                                    | eukaryotic translation initiation factor 2-alpha kinase 2                                                    | Cluster0011_Phagocyte-related |
| 1440866_at   | Eif2ak2                                    | eukaryotic translation initiation factor 2-alpha kinase 2                                                    | Cluster0011_Phagocyte-related |
| 1418992_at   | F10                                        | coagulation factor X                                                                                         | Cluster0011_Phagocyte-related |
| 1418993_s_at | F10                                        | coagulation factor X                                                                                         | Cluster0011_Phagocyte-related |
| 1449305_at   | F10                                        | coagulation factor X                                                                                         | Cluster0011_Phagocyte-related |
| 1416023_at   | Fabp3                                      | fatty acid binding protein 3, muscle and heart                                                               | Cluster0011_Phagocyte-related |
| 1436576_at   | Fam26f                                     | family with sequence similarity 26, member F                                                                 | Cluster0011_Phagocyte-related |
| 1443863_at   | Fndc3a                                     | fibronectin type III domain containing 3A                                                                    | Cluster0011_Phagocyte-related |
| 1440342_at   | G530011O06Rik                              | RIKEN cDNA G530011O06 gene                                                                                   | Cluster0011_Phagocyte-related |
| 1418240_at   | Gbp2                                       | guanylate binding protein 2                                                                                  | Cluster0011_Phagocyte-related |
| 1435906_x_at | Gbp2                                       | guanylate binding protein 2                                                                                  | Cluster0011_Phagocyte-related |
| 1418392_a_at | Gbp3                                       | guanylate binding protein 3                                                                                  | Cluster0011_Phagocyte-related |
| 1420499_at   | Gch1                                       | GTP cyclohydrolase 1                                                                                         | Cluster0011_Phagocyte-related |
| 1453939_x_at | Gm9706                                     | predicted gene 9706                                                                                          | Cluster0011_Phagocyte-related |
| 1431591_s_at | Gm9706 /// lsg15                           | predicted gene 9706 /// ISG15 ubiquitin-like modifier                                                        | Cluster0011_Phagocyte-related |
| 1422160_at   | H2-T24                                     | histocompatibility 2, T region locus 24                                                                      | Cluster0011_Phagocyte-related |
| 1419196_at   | Hamp                                       | hepcidin antimicrobial peptide                                                                               | Cluster0011_Phagocyte-related |
| 1419197_x_at | Hamp                                       | hepcidin antimicrobial peptide                                                                               | Cluster0011_Phagocyte-related |
| 1431095_a_at | Herc5                                      | hect domain and RLD 5                                                                                        | Cluster0011_Phagocyte-related |
| 1432026_a_at | Herc5                                      | hect domain and RLD 5                                                                                        | Cluster0011_Phagocyte-related |
| 1438037_at   | Herc5                                      | hect domain and RLD 5                                                                                        | Cluster0011_Phagocyte-related |
| 1453757_at   | Herc5                                      | hect domain and RLD 5                                                                                        | Cluster0011_Phagocyte-related |
| 1458802_at   | Hivep3                                     | human immunodeficiency virus type 1 enhancer binding protein 3                                               | Cluster0011_Phagocyte-related |
| 1424067_at   | Icam1                                      | intercellular adhesion molecule 1                                                                            | Cluster0011_Phagocyte-related |
| 1425008_a_at | Ifi203                                     | interferon activated gene 203                                                                                | Cluster0011_Phagocyte-related |
| 1452348_s_at | Ifi203 /// Ifi204 /// Ifi205 /// LOC640890 | interferon activated gene 203 /// interferon activated gene 204 /// interferon activated gene 205 /// simila | Cluster0011_Phagocyte-related |
| 1419603_at   | Ifi204                                     | interferon activated gene 204                                                                                | Cluster0011_Phagocyte-related |
| 1452349_x_at | Ifi205 /// Mnda                            | interferon activated gene 205 /// myeloid cell nuclear differentiation antigen                               | Cluster0011_Phagocyte-related |
| 1450783_at   | Ifit1                                      | interferon-induced protein with tetratricopeptide repeats 1                                                  | Cluster0011_Phagocyte-related |
| 1418293_at   | Ifit2                                      | interferon-induced protein with tetratricopeptide repeats 2                                                  | Cluster0011_Phagocyte-related |
| 1449025_at   | Ifit3                                      | interferon-induced protein with tetratricopeptide repeats 3                                                  | Cluster0011_Phagocyte-related |

|              |                         |                                                                                                         |                               |
|--------------|-------------------------|---------------------------------------------------------------------------------------------------------|-------------------------------|
| 1460675_at   | Igsf8                   | immunoglobulin superfamily, member 8                                                                    | Cluster0011_Phagocyte-related |
| 1425454_a_at | Il12a                   | interleukin 12a                                                                                         | Cluster0011_Phagocyte-related |
| 1419530_at   | Il12b                   | interleukin 12b                                                                                         | Cluster0011_Phagocyte-related |
| 1449497_at   | Il12b                   | interleukin 12b                                                                                         | Cluster0011_Phagocyte-related |
| 1418219_at   | Il15                    | interleukin 15                                                                                          | Cluster0011_Phagocyte-related |
| 1422397_a_at | Il15ra                  | interleukin 15 receptor, alpha chain                                                                    | Cluster0011_Phagocyte-related |
| 1448681_at   | Il15ra                  | interleukin 15 receptor, alpha chain                                                                    | Cluster0011_Phagocyte-related |
| 1421473_at   | Il1a                    | interleukin 1 alpha                                                                                     | Cluster0011_Phagocyte-related |
| 1449399_a_at | Il1b                    | interleukin 1 beta                                                                                      | Cluster0011_Phagocyte-related |
| 1423017_a_at | Il1rn                   | interleukin 1 receptor antagonist                                                                       | Cluster0011_Phagocyte-related |
| 1425663_at   | Il1rn                   | interleukin 1 receptor antagonist                                                                       | Cluster0011_Phagocyte-related |
| 1451798_at   | Il1rn                   | interleukin 1 receptor antagonist                                                                       | Cluster0011_Phagocyte-related |
| 1450297_at   | Il6                     | interleukin 6                                                                                           | Cluster0011_Phagocyte-related |
| 1436622_at   | Iqsec2                  | IQ motif and Sec7 domain 2                                                                              | Cluster0011_Phagocyte-related |
| 1417244_a_at | Irf7                    | interferon regulatory factor 7                                                                          | Cluster0011_Phagocyte-related |
| 1427381_at   | Irg1                    | immunoresponsive gene 1                                                                                 | Cluster0011_Phagocyte-related |
| 1418825_at   | Irgm1                   | immunity-related GTPase family M member 1                                                               | Cluster0011_Phagocyte-related |
| 1421828_at   | Kpna3                   | karyopherin (importin) alpha 3                                                                          | Cluster0011_Phagocyte-related |
| 1450385_at   | Kpna3                   | karyopherin (importin) alpha 3                                                                          | Cluster0011_Phagocyte-related |
| 1450386_at   | Kpna3                   | karyopherin (importin) alpha 3                                                                          | Cluster0011_Phagocyte-related |
| 1422068_at   | LOC100045707 /// Pou3f1 | similar to long overlapping ORF; NH2 terminus uncertain /// POU domain, class 3, transcription factor 1 | Cluster0011_Phagocyte-related |
| 1460038_at   | LOC100045707 /// Pou3f1 | similar to long overlapping ORF; NH2 terminus uncertain /// POU domain, class 3, transcription factor 1 | Cluster0011_Phagocyte-related |
| 1428119_a_at | LOC100047558 /// Rap2c  | similar to RAP2C, member of RAS oncogene family /// RAP2C, member of RAS oncogene family                | Cluster0011_Phagocyte-related |
| 1454605_a_at | LOC100047707 /// Pi4k2a | hypothetical protein LOC100047707 /// phosphatidylinositol 4-kinase type 2 alpha                        | Cluster0011_Phagocyte-related |
| 1428660_s_at | LOC100047963 /// Tor3a  | similar to ADIR1 /// torsin family 3, member A                                                          | Cluster0011_Phagocyte-related |
| 1418191_at   | LOC100048346 /// Usp18  | similar to ubiquitin specific protease UBP43 /// ubiquitin specific peptidase 18                        | Cluster0011_Phagocyte-related |
| 1431774_a_at | Lymr1                   | LYR motif containing 1                                                                                  | Cluster0011_Phagocyte-related |
| 1456126_at   | Malt1                   | mucosa associated lymphoid tissue lymphoma translocation gene 1                                         | Cluster0011_Phagocyte-related |
| 1428027_at   | Mir155                  | microRNA 155                                                                                            | Cluster0011_Phagocyte-related |
| 1429570_at   | Mkl1                    | mixed lineage kinase domain-like                                                                        | Cluster0011_Phagocyte-related |
| 1422132_at   | Mthfr                   | 5,10-methylenetetrahydrofolate reductase                                                                | Cluster0011_Phagocyte-related |
| 1434087_at   | Mthfr                   | 5,10-methylenetetrahydrofolate reductase                                                                | Cluster0011_Phagocyte-related |
| 1450498_at   | Mthfr                   | 5,10-methylenetetrahydrofolate reductase                                                                | Cluster0011_Phagocyte-related |
| 1425066_a_at | Mtmr14                  | myotubularin related protein 14                                                                         | Cluster0011_Phagocyte-related |
| 1451905_a_at | Mx1                     | myxovirus (influenza virus) resistance 1                                                                | Cluster0011_Phagocyte-related |
| 1419676_at   | Mx2                     | myxovirus (influenza virus) resistance 2                                                                | Cluster0011_Phagocyte-related |
| 1419272_at   | Myd88                   | myeloid differentiation primary response gene 88                                                        | Cluster0011_Phagocyte-related |
| 1436032_at   | NA                      | ---                                                                                                     | Cluster0011_Phagocyte-related |
| 1440506_at   | NA                      | ---                                                                                                     | Cluster0011_Phagocyte-related |
| 1442640_at   | NA                      | ---                                                                                                     | Cluster0011_Phagocyte-related |
| 1442994_at   | NA                      | ---                                                                                                     | Cluster0011_Phagocyte-related |
| 1444203_at   | NA                      | ---                                                                                                     | Cluster0011_Phagocyte-related |
| 1456778_at   | NA                      | ---                                                                                                     | Cluster0011_Phagocyte-related |
| 1425902_a_at | Nfkb2                   | nuclear factor of kappa light polypeptide gene enhancer in B-cells 2, p49/p100                          | Cluster0011_Phagocyte-related |
| 1421266_s_at | Nfkbib                  | nuclear factor of kappa light polypeptide gene enhancer in B-cells inhibitor, beta                      | Cluster0011_Phagocyte-related |
| 1419721_at   | Niacr1                  | niacin receptor 1                                                                                       | Cluster0011_Phagocyte-related |
| 1425412_at   | Nlrp3                   | NLR family, pyrin domain containing 3                                                                   | Cluster0011_Phagocyte-related |
| 1426528_at   | Nrp2                    | neuropilin 2                                                                                            | Cluster0011_Phagocyte-related |
| 1435349_at   | Nrp2                    | neuropilin 2                                                                                            | Cluster0011_Phagocyte-related |
| 1425374_at   | Oas3                    | 2'-5' oligoadenylate synthetase 3                                                                       | Cluster0011_Phagocyte-related |
| 1424339_at   | Oasl1                   | 2'-5' oligoadenylate synthetase-like 1                                                                  | Cluster0011_Phagocyte-related |
| 1453196_a_at | Oasl2                   | 2'-5' oligoadenylate synthetase-like 2                                                                  | Cluster0011_Phagocyte-related |
| 1422511_a_at | Ogfr                    | opioid growth factor receptor                                                                           | Cluster0011_Phagocyte-related |
| 1419534_at   | Olr1                    | oxidized low density lipoprotein (lectin-like) receptor 1                                               | Cluster0011_Phagocyte-related |
| 1426774_at   | Parp12                  | poly (ADP-ribose) polymerase family, member 12                                                          | Cluster0011_Phagocyte-related |
| 1417523_at   | Plek                    | pleckstrin                                                                                              | Cluster0011_Phagocyte-related |
| 1448748_at   | Plek                    | pleckstrin                                                                                              | Cluster0011_Phagocyte-related |



|              |                 |                                                                                     |                               |
|--------------|-----------------|-------------------------------------------------------------------------------------|-------------------------------|
| 1448749_at   | Plek            | pleckstrin                                                                          | Cluster0011_Phagocyte-related |
| 1424287_at   | Prkx            | protein kinase, X-linked                                                            | Cluster0011_Phagocyte-related |
| 1425587_a_at | Ptprj           | protein tyrosine phosphatase, receptor type, J                                      | Cluster0011_Phagocyte-related |
| 1425588_at   | Ptprj           | protein tyrosine phosphatase, receptor type, J                                      | Cluster0011_Phagocyte-related |
| 1455030_at   | Ptprj           | protein tyrosine phosphatase, receptor type, J                                      | Cluster0011_Phagocyte-related |
| 1460634_at   | Ralgds          | ral guanine nucleotide dissociation stimulator                                      | Cluster0011_Phagocyte-related |
| 1417333_at   | Rasa4           | RAS p21 protein activator 4                                                         | Cluster0011_Phagocyte-related |
| 1454742_at   | Rasgef1b        | RasGEF domain family, member 1B                                                     | Cluster0011_Phagocyte-related |
| 1444009_at   | Rassf4          | Ras association (RalGDS/AF-6) domain family member 4                                | Cluster0011_Phagocyte-related |
| 1434774_at   | Rhbdf2          | rhomboid 5 homolog 2 (Drosophila)                                                   | Cluster0011_Phagocyte-related |
| 1452289_a_at | Rnf135          | ring finger protein 135                                                             | Cluster0011_Phagocyte-related |
| 1455500_at   | Rnf213          | ring finger protein 213                                                             | Cluster0011_Phagocyte-related |
| 1421008_at   | Rsad2           | radical S-adenosyl methionine domain containing 2                                   | Cluster0011_Phagocyte-related |
| 1421009_at   | Rsad2           | radical S-adenosyl methionine domain containing 2                                   | Cluster0011_Phagocyte-related |
| 1436058_at   | Rsad2           | radical S-adenosyl methionine domain containing 2                                   | Cluster0011_Phagocyte-related |
| 1449143_at   | Rtp4            | receptor transporter protein 4                                                      | Cluster0011_Phagocyte-related |
| 1419082_at   | Serpinp2        | serine (or cysteine) peptidase inhibitor, clade B, member 2                         | Cluster0011_Phagocyte-related |
| 1453472_a_at | Slamf7          | SLAM family member 7                                                                | Cluster0011_Phagocyte-related |
| 1425294_at   | Slamf8          | SLAM family member 8                                                                | Cluster0011_Phagocyte-related |
| 1452078_a_at | Slc11a2         | solute carrier family 11 (proton-coupled divalent metal ion transporters), member 2 | Cluster0011_Phagocyte-related |
| 1420697_at   | Slc15a3         | solute carrier family 15, member 3                                                  | Cluster0011_Phagocyte-related |
| 1434015_at   | Slc2a6          | solute carrier family 2 (facilitated glucose transporter), member 6                 | Cluster0011_Phagocyte-related |
| 1422648_at   | Slc7a2          | solute carrier family 7 (cationic amino acid transporter, y+ system), member 2      | Cluster0011_Phagocyte-related |
| 1426008_a_at | Slc7a2          | solute carrier family 7 (cationic amino acid transporter, y+ system), member 2      | Cluster0011_Phagocyte-related |
| 1436555_at   | Slc7a2          | solute carrier family 7 (cationic amino acid transporter, y+ system), member 2      | Cluster0011_Phagocyte-related |
| 1450703_at   | Slc7a2          | solute carrier family 7 (cationic amino acid transporter, y+ system), member 2      | Cluster0011_Phagocyte-related |
| 1434537_at   | Slco3a1         | solute carrier organic anion transporter family, member 3a1                         | Cluster0011_Phagocyte-related |
| 1448918_at   | Slco3a1         | solute carrier organic anion transporter family, member 3a1                         | Cluster0011_Phagocyte-related |
| 1450165_at   | Slnf2           | schlafen 2                                                                          | Cluster0011_Phagocyte-related |
| 1450322_s_at | Slnf3 /// Slnf4 | schlafen 3 /// schlafen 4                                                           | Cluster0011_Phagocyte-related |
| 1427102_at   | Slnf4           | schlafen 4                                                                          | Cluster0011_Phagocyte-related |
| 1456288_at   | Slnf5           | schlafen 5                                                                          | Cluster0011_Phagocyte-related |
| 1458458_at   | Slnf5           | schlafen 5                                                                          | Cluster0011_Phagocyte-related |
| 1451655_at   | Slnf8           | schlafen 8                                                                          | Cluster0011_Phagocyte-related |
| 1431055_a_at | Snx10           | sorting nexin 10                                                                    | Cluster0011_Phagocyte-related |
| 1418946_at   | St3gal1         | ST3 beta-galactoside alpha-2,3-sialyltransferase 1                                  | Cluster0011_Phagocyte-related |
| 1417405_at   | Stard3          | START domain containing 3                                                           | Cluster0011_Phagocyte-related |
| 1421911_at   | Stat2           | signal transducer and activator of transcription 2                                  | Cluster0011_Phagocyte-related |
| 1450403_at   | Stat2           | signal transducer and activator of transcription 2                                  | Cluster0011_Phagocyte-related |
| 1421640_a_at | Tank            | TRAF family member-associated Nf-kappa B activator                                  | Cluster0011_Phagocyte-related |
| 1424082_at   | Tbc1d13         | TBC1 domain family, member 13                                                       | Cluster0011_Phagocyte-related |
| 1419132_at   | Tlr2            | toll-like receptor 2                                                                | Cluster0011_Phagocyte-related |
| 1453492_at   | Tmem67          | transmembrane protein 67                                                            | Cluster0011_Phagocyte-related |
| 1419607_at   | Tnf             | tumor necrosis factor                                                               | Cluster0011_Phagocyte-related |
| 1416273_at   | Tnfaip2         | tumor necrosis factor, alpha-induced protein 2                                      | Cluster0011_Phagocyte-related |
| 1450829_at   | Tnfaip3         | tumor necrosis factor, alpha-induced protein 3                                      | Cluster0011_Phagocyte-related |
| 1418099_at   | Tnfrsf1b        | tumor necrosis factor receptor superfamily, member 1b                               | Cluster0011_Phagocyte-related |
| 1448951_at   | Tnfrsf1b        | tumor necrosis factor receptor superfamily, member 1b                               | Cluster0011_Phagocyte-related |
| 1422924_at   | Tnfsf9          | tumor necrosis factor (ligand) superfamily, member 9                                | Cluster0011_Phagocyte-related |
| 1427689_a_at | Tnip1           | TNFAIP3 interacting protein 1                                                       | Cluster0011_Phagocyte-related |
| 1426084_a_at | Tor1aip1        | torsin A interacting protein 1                                                      | Cluster0011_Phagocyte-related |
| 1458364_s_at | Tor1aip1        | torsin A interacting protein 1                                                      | Cluster0011_Phagocyte-related |
| 1421998_at   | Tor3a           | torsin family 3, member A                                                           | Cluster0011_Phagocyte-related |
| 1450454_at   | Tor3a           | torsin family 3, member A                                                           | Cluster0011_Phagocyte-related |
| 1423602_at   | Traf1           | TNF receptor-associated factor 1                                                    | Cluster0011_Phagocyte-related |
| 1450672_a_at | Trex1           | three prime repair exonuclease 1                                                    | Cluster0011_Phagocyte-related |
| 1418077_at   | Trim21          | tripartite motif-containing 21                                                      | Cluster0011_Phagocyte-related |

|              |                                        |                                                                                                          |                                                  |
|--------------|----------------------------------------|----------------------------------------------------------------------------------------------------------|--------------------------------------------------|
| 1426415_a_at | Trim25                                 | tripartite motif-containing 25                                                                           | Cluster0011_Phagocyte-related                    |
| 1451860_a_at | Trim30                                 | tripartite motif-containing 30                                                                           | Cluster0011_Phagocyte-related                    |
| 1420723_at   | Vnn3                                   | vanin 3                                                                                                  | Cluster0011_Phagocyte-related                    |
| 1443698_at   | Xaf1                                   | XIAP associated factor 1                                                                                 | Cluster0011_Phagocyte-related                    |
| 1439590_at   | Xkr8                                   | X Kell blood group precursor related family member 8 homolog                                             | Cluster0011_Phagocyte-related                    |
| 1455704_at   | Xkr8                                   | X Kell blood group precursor related family member 8 homolog                                             | Cluster0011_Phagocyte-related                    |
| 1419604_at   | Zbp1                                   | Z-DNA binding protein 1                                                                                  | Cluster0011_Phagocyte-related                    |
| 1429947_a_at | Zbp1                                   | Z-DNA binding protein 1                                                                                  | Cluster0011_Phagocyte-related                    |
| 1427091_at   | Znfx1                                  | zinc finger, NFX1-type containing 1                                                                      | Cluster0011_Phagocyte-related                    |
| 1442363_at   | 1110012J17Rik                          | RIKEN cDNA 1110012J17 gene                                                                               | Cluster0012_High in Bruce 4 embryonic stem cells |
| 1449276_at   | 1700029P11Rik                          | RIKEN cDNA 1700029P11 gene                                                                               | Cluster0012_High in Bruce 4 embryonic stem cells |
| 1437019_at   | 2200001I15Rik                          | RIKEN cDNA 2200001I15 gene                                                                               | Cluster0012_High in Bruce 4 embryonic stem cells |
| 1419106_at   | 2210409E12Rik                          | transcription elongation factor B (SIII), polypeptide 2 pseudogene                                       | Cluster0012_High in Bruce 4 embryonic stem cells |
| 1449344_s_at | 2210409E12Rik                          | transcription elongation factor B (SIII), polypeptide 2 pseudogene                                       | Cluster0012_High in Bruce 4 embryonic stem cells |
| 1429377_at   | 2410004A20Rik                          | RIKEN cDNA 2410004A20 gene                                                                               | Cluster0012_High in Bruce 4 embryonic stem cells |
| 1454215_at   | 2410007B07Rik                          | RIKEN cDNA 2410007B07 gene                                                                               | Cluster0012_High in Bruce 4 embryonic stem cells |
| 1428604_at   | 2610305D13Rik                          | RIKEN cDNA 2610305D13 gene                                                                               | Cluster0012_High in Bruce 4 embryonic stem cells |
| 1431979_at   | 4930444M15Rik                          | RIKEN cDNA 4930444M15 gene                                                                               | Cluster0012_High in Bruce 4 embryonic stem cells |
| 1429932_at   | 4930566F21Rik                          | RIKEN cDNA 4930566F21 gene                                                                               | Cluster0012_High in Bruce 4 embryonic stem cells |
| 1453700_s_at | 4933403O03Rik /// Gm4981               | RIKEN cDNA 4933403O03 gene /// predicted gene 4981                                                       | Cluster0012_High in Bruce 4 embryonic stem cells |
| 1435497_at   | 5730590G19Rik /// LOC100047683         | RIKEN cDNA 5730590G19 gene /// hypothetical protein LOC100047683                                         | Cluster0012_High in Bruce 4 embryonic stem cells |
| 1439723_at   | 5730590G19Rik /// LOC100047683         | RIKEN cDNA 5730590G19 gene /// hypothetical protein LOC100047683                                         | Cluster0012_High in Bruce 4 embryonic stem cells |
| 1435929_at   | 9630033F20Rik                          | RIKEN cDNA 9630033F20 gene                                                                               | Cluster0012_High in Bruce 4 embryonic stem cells |
| 1436742_a_at | Accs1                                  | 1-aminocyclopropane-1-carboxylate synthase homolog (Arabidopsis)(non-functional)-like                    | Cluster0012_High in Bruce 4 embryonic stem cells |
| 1417889_at   | Apobec2                                | apolipoprotein B mRNA editing enzyme, catalytic polypeptide 2                                            | Cluster0012_High in Bruce 4 embryonic stem cells |
| 1427603_at   | Atf7ip2                                | activating transcription factor 7 interacting protein 2                                                  | Cluster0012_High in Bruce 4 embryonic stem cells |
| 1430364_at   | Atf7ip2                                | activating transcription factor 7 interacting protein 2                                                  | Cluster0012_High in Bruce 4 embryonic stem cells |
| 1435154_at   | AU018091                               | expressed sequence AU018091                                                                              | Cluster0012_High in Bruce 4 embryonic stem cells |
| 1449364_at   | Aurkc                                  | aurora kinase C                                                                                          | Cluster0012_High in Bruce 4 embryonic stem cells |
| 1427479_at   | BB287469 /// Eif1a /// Gm2022 /// Gm40 | expressed sequence BB287469 /// eukaryotic translation initiation factor 1A /// predicted pseudogene 202 | Cluster0012_High in Bruce 4 embryonic stem cells |
| 1449972_s_at | BC018101 /// Zfp97                     | cDNA sequence BC018101 /// zinc finger protein 97                                                        | Cluster0012_High in Bruce 4 embryonic stem cells |
| 1445849_at   | BC080696                               | cDNA sequence BC080696                                                                                   | Cluster0012_High in Bruce 4 embryonic stem cells |
| 1428209_at   | Bex4                                   | brain expressed gene 4                                                                                   | Cluster0012_High in Bruce 4 embryonic stem cells |
| 1443945_at   | C130073F10Rik                          | RIKEN cDNA C130073F10 gene                                                                               | Cluster0012_High in Bruce 4 embryonic stem cells |
| 1443052_at   | C330019L16Rik /// Gm2381               | RIKEN cDNA C330019L16 gene /// predicted gene 2381                                                       | Cluster0012_High in Bruce 4 embryonic stem cells |
| 1429483_at   | Calcoco2                               | calcium binding and coiled-coil domain 2                                                                 | Cluster0012_High in Bruce 4 embryonic stem cells |
| 1437936_at   | Ccdc160                                | coiled-coil domain containing 160                                                                        | Cluster0012_High in Bruce 4 embryonic stem cells |
| 1416492_at   | Ccne1                                  | cyclin E1                                                                                                | Cluster0012_High in Bruce 4 embryonic stem cells |
| 1432229_a_at | Cdyl2                                  | chromodomain protein, Y chromosome-like 2                                                                | Cluster0012_High in Bruce 4 embryonic stem cells |
| 1430086_at   | Chrna9                                 | cholinergic receptor, nicotinic, alpha polypeptide 9                                                     | Cluster0012_High in Bruce 4 embryonic stem cells |
| 1417845_at   | Cldn6                                  | claudin 6                                                                                                | Cluster0012_High in Bruce 4 embryonic stem cells |
| 1419959_s_at | Cphx                                   | cytoplasmic polyadenylated homeobox                                                                      | Cluster0012_High in Bruce 4 embryonic stem cells |
| 1455999_at   | Cphx                                   | cytoplasmic polyadenylated homeobox                                                                      | Cluster0012_High in Bruce 4 embryonic stem cells |
| 1460605_at   | Crxos1                                 | Crx opposite strand transcript 1                                                                         | Cluster0012_High in Bruce 4 embryonic stem cells |
| 1419929_at   | D15Ert455e                             | DNA segment, Chr 15, ERATO Doi 55, expressed                                                             | Cluster0012_High in Bruce 4 embryonic stem cells |
| 1419930_at   | D15Ert455e                             | DNA segment, Chr 15, ERATO Doi 55, expressed                                                             | Cluster0012_High in Bruce 4 embryonic stem cells |
| 1422956_at   | D1Pas1                                 | DNA segment, Chr 1, Pasteur Institute 1                                                                  | Cluster0012_High in Bruce 4 embryonic stem cells |
| 1437693_at   | D1Pas1                                 | DNA segment, Chr 1, Pasteur Institute 1                                                                  | Cluster0012_High in Bruce 4 embryonic stem cells |
| 1456891_at   | Dennd2c                                | DENN/MADD domain containing 2C                                                                           | Cluster0012_High in Bruce 4 embryonic stem cells |
| 1423925_at   | Dhx16                                  | DEAH (Asp-Glu-Ala-His) box polypeptide 16                                                                | Cluster0012_High in Bruce 4 embryonic stem cells |
| 1423582_at   | Dmrt1                                  | doublesex and mab-3 related transcription factor 1                                                       | Cluster0012_High in Bruce 4 embryonic stem cells |
| 1425035_s_at | Dnmt3l                                 | DNA (cytosine-5-)-methyltransferase 3-like                                                               | Cluster0012_High in Bruce 4 embryonic stem cells |
| 1429654_at   | Dppa2                                  | developmental pluripotency associated 2                                                                  | Cluster0012_High in Bruce 4 embryonic stem cells |
| 1453223_s_at | Dppa2                                  | developmental pluripotency associated 2                                                                  | Cluster0012_High in Bruce 4 embryonic stem cells |
| 1429597_at   | Dppa4                                  | developmental pluripotency associated 4                                                                  | Cluster0012_High in Bruce 4 embryonic stem cells |
| 1416552_at   | Dppa5a                                 | developmental pluripotency associated 5A                                                                 | Cluster0012_High in Bruce 4 embryonic stem cells |
| 1436291_a_at | Dpys                                   | dihydropyrimidinase                                                                                      | Cluster0012_High in Bruce 4 embryonic stem cells |

|              |                                                                                                                                                                                                                                                                                                                                                                                                                                                                                                                                                                                                                                                                                                                                                                                                                                                                                                                                                                                                                                                                                                                                                                                                                                                                                                                                                                                                                                                                                                                                                                                                                                                                                                                                                                                                                                                                                                                                                                                                                                                                                                                                                                                                                                                                                                                                                                                                                                                                                                                                                                                                                                                                                                                                                                                                                                                                                                                                                                                                                                                                                                                                                                                                                                                                                                                                                                                                                                                                                                                                                                                                                                                                                                                                                                                                                                                                                                                                                                                                                                                                                                                                                                                                                                                                                                                                                                                                                                                                                                                                                                                                                                                                                                                                                                                                                                                                                                                                                                                                                                                                                                                                                                                                                                                                                                                                                                                                                                                                                                                                                                                                                                                                                                                                                                                                                                                                                                                                                                                                                                                                                                                                            |                                                                                                            |                                                  |
|--------------|--------------------------------------------------------------------------------------------------------------------------------------------------------------------------------------------------------------------------------------------------------------------------------------------------------------------------------------------------------------------------------------------------------------------------------------------------------------------------------------------------------------------------------------------------------------------------------------------------------------------------------------------------------------------------------------------------------------------------------------------------------------------------------------------------------------------------------------------------------------------------------------------------------------------------------------------------------------------------------------------------------------------------------------------------------------------------------------------------------------------------------------------------------------------------------------------------------------------------------------------------------------------------------------------------------------------------------------------------------------------------------------------------------------------------------------------------------------------------------------------------------------------------------------------------------------------------------------------------------------------------------------------------------------------------------------------------------------------------------------------------------------------------------------------------------------------------------------------------------------------------------------------------------------------------------------------------------------------------------------------------------------------------------------------------------------------------------------------------------------------------------------------------------------------------------------------------------------------------------------------------------------------------------------------------------------------------------------------------------------------------------------------------------------------------------------------------------------------------------------------------------------------------------------------------------------------------------------------------------------------------------------------------------------------------------------------------------------------------------------------------------------------------------------------------------------------------------------------------------------------------------------------------------------------------------------------------------------------------------------------------------------------------------------------------------------------------------------------------------------------------------------------------------------------------------------------------------------------------------------------------------------------------------------------------------------------------------------------------------------------------------------------------------------------------------------------------------------------------------------------------------------------------------------------------------------------------------------------------------------------------------------------------------------------------------------------------------------------------------------------------------------------------------------------------------------------------------------------------------------------------------------------------------------------------------------------------------------------------------------------------------------------------------------------------------------------------------------------------------------------------------------------------------------------------------------------------------------------------------------------------------------------------------------------------------------------------------------------------------------------------------------------------------------------------------------------------------------------------------------------------------------------------------------------------------------------------------------------------------------------------------------------------------------------------------------------------------------------------------------------------------------------------------------------------------------------------------------------------------------------------------------------------------------------------------------------------------------------------------------------------------------------------------------------------------------------------------------------------------------------------------------------------------------------------------------------------------------------------------------------------------------------------------------------------------------------------------------------------------------------------------------------------------------------------------------------------------------------------------------------------------------------------------------------------------------------------------------------------------------------------------------------------------------------------------------------------------------------------------------------------------------------------------------------------------------------------------------------------------------------------------------------------------------------------------------------------------------------------------------------------------------------------------------------------------------------------------------------------------------------------------------------|------------------------------------------------------------------------------------------------------------|--------------------------------------------------|
| 1420773_at   | Dub1                                                                                                                                                                                                                                                                                                                                                                                                                                                                                                                                                                                                                                                                                                                                                                                                                                                                                                                                                                                                                                                                                                                                                                                                                                                                                                                                                                                                                                                                                                                                                                                                                                                                                                                                                                                                                                                                                                                                                                                                                                                                                                                                                                                                                                                                                                                                                                                                                                                                                                                                                                                                                                                                                                                                                                                                                                                                                                                                                                                                                                                                                                                                                                                                                                                                                                                                                                                                                                                                                                                                                                                                                                                                                                                                                                                                                                                                                                                                                                                                                                                                                                                                                                                                                                                                                                                                                                                                                                                                                                                                                                                                                                                                                                                                                                                                                                                                                                                                                                                                                                                                                                                                                                                                                                                                                                                                                                                                                                                                                                                                                                                                                                                                                                                                                                                                                                                                                                                                                                                                                                                                                                                                       | deubiquitinating enzyme 1                                                                                  | Cluster0012_High in Bruce 4 embryonic stem cells |
| 1439746_at   | Dusp27                                                                                                                                                                                                                                                                                                                                                                                                                                                                                                                                                                                                                                                                                                                                                                                                                                                                                                                                                                                                                                                                                                                                                                                                                                                                                                                                                                                                                                                                                                                                                                                                                                                                                                                                                                                                                                                                                                                                                                                                                                                                                                                                                                                                                                                                                                                                                                                                                                                                                                                                                                                                                                                                                                                                                                                                                                                                                                                                                                                                                                                                                                                                                                                                                                                                                                                                                                                                                                                                                                                                                                                                                                                                                                                                                                                                                                                                                                                                                                                                                                                                                                                                                                                                                                                                                                                                                                                                                                                                                                                                                                                                                                                                                                                                                                                                                                                                                                                                                                                                                                                                                                                                                                                                                                                                                                                                                                                                                                                                                                                                                                                                                                                                                                                                                                                                                                                                                                                                                                                                                                                                                                                                     | dual specificity phosphatase 27 (putative)                                                                 | Cluster0012_High in Bruce 4 embryonic stem cells |
| 1458716_at   | Dusp27                                                                                                                                                                                                                                                                                                                                                                                                                                                                                                                                                                                                                                                                                                                                                                                                                                                                                                                                                                                                                                                                                                                                                                                                                                                                                                                                                                                                                                                                                                                                                                                                                                                                                                                                                                                                                                                                                                                                                                                                                                                                                                                                                                                                                                                                                                                                                                                                                                                                                                                                                                                                                                                                                                                                                                                                                                                                                                                                                                                                                                                                                                                                                                                                                                                                                                                                                                                                                                                                                                                                                                                                                                                                                                                                                                                                                                                                                                                                                                                                                                                                                                                                                                                                                                                                                                                                                                                                                                                                                                                                                                                                                                                                                                                                                                                                                                                                                                                                                                                                                                                                                                                                                                                                                                                                                                                                                                                                                                                                                                                                                                                                                                                                                                                                                                                                                                                                                                                                                                                                                                                                                                                                     | dual specificity phosphatase 27 (putative)                                                                 | Cluster0012_High in Bruce 4 embryonic stem cells |
| 1433844_a_at | Dusp9                                                                                                                                                                                                                                                                                                                                                                                                                                                                                                                                                                                                                                                                                                                                                                                                                                                                                                                                                                                                                                                                                                                                                                                                                                                                                                                                                                                                                                                                                                                                                                                                                                                                                                                                                                                                                                                                                                                                                                                                                                                                                                                                                                                                                                                                                                                                                                                                                                                                                                                                                                                                                                                                                                                                                                                                                                                                                                                                                                                                                                                                                                                                                                                                                                                                                                                                                                                                                                                                                                                                                                                                                                                                                                                                                                                                                                                                                                                                                                                                                                                                                                                                                                                                                                                                                                                                                                                                                                                                                                                                                                                                                                                                                                                                                                                                                                                                                                                                                                                                                                                                                                                                                                                                                                                                                                                                                                                                                                                                                                                                                                                                                                                                                                                                                                                                                                                                                                                                                                                                                                                                                                                                      | dual specificity phosphatase 9                                                                             | Cluster0012_High in Bruce 4 embryonic stem cells |
| 1433845_x_at | Dusp9                                                                                                                                                                                                                                                                                                                                                                                                                                                                                                                                                                                                                                                                                                                                                                                                                                                                                                                                                                                                                                                                                                                                                                                                                                                                                                                                                                                                                                                                                                                                                                                                                                                                                                                                                                                                                                                                                                                                                                                                                                                                                                                                                                                                                                                                                                                                                                                                                                                                                                                                                                                                                                                                                                                                                                                                                                                                                                                                                                                                                                                                                                                                                                                                                                                                                                                                                                                                                                                                                                                                                                                                                                                                                                                                                                                                                                                                                                                                                                                                                                                                                                                                                                                                                                                                                                                                                                                                                                                                                                                                                                                                                                                                                                                                                                                                                                                                                                                                                                                                                                                                                                                                                                                                                                                                                                                                                                                                                                                                                                                                                                                                                                                                                                                                                                                                                                                                                                                                                                                                                                                                                                                                      | dual specificity phosphatase 9                                                                             | Cluster0012_High in Bruce 4 embryonic stem cells |
| 1454737_at   | Dusp9                                                                                                                                                                                                                                                                                                                                                                                                                                                                                                                                                                                                                                                                                                                                                                                                                                                                                                                                                                                                                                                                                                                                                                                                                                                                                                                                                                                                                                                                                                                                                                                                                                                                                                                                                                                                                                                                                                                                                                                                                                                                                                                                                                                                                                                                                                                                                                                                                                                                                                                                                                                                                                                                                                                                                                                                                                                                                                                                                                                                                                                                                                                                                                                                                                                                                                                                                                                                                                                                                                                                                                                                                                                                                                                                                                                                                                                                                                                                                                                                                                                                                                                                                                                                                                                                                                                                                                                                                                                                                                                                                                                                                                                                                                                                                                                                                                                                                                                                                                                                                                                                                                                                                                                                                                                                                                                                                                                                                                                                                                                                                                                                                                                                                                                                                                                                                                                                                                                                                                                                                                                                                                                                      | dual specificity phosphatase 9                                                                             | Cluster0012_High in Bruce 4 embryonic stem cells |
| 1426980_s_at | E130012A19Rik                                                                                                                                                                                                                                                                                                                                                                                                                                                                                                                                                                                                                                                                                                                                                                                                                                                                                                                                                                                                                                                                                                                                                                                                                                                                                                                                                                                                                                                                                                                                                                                                                                                                                                                                                                                                                                                                                                                                                                                                                                                                                                                                                                                                                                                                                                                                                                                                                                                                                                                                                                                                                                                                                                                                                                                                                                                                                                                                                                                                                                                                                                                                                                                                                                                                                                                                                                                                                                                                                                                                                                                                                                                                                                                                                                                                                                                                                                                                                                                                                                                                                                                                                                                                                                                                                                                                                                                                                                                                                                                                                                                                                                                                                                                                                                                                                                                                                                                                                                                                                                                                                                                                                                                                                                                                                                                                                                                                                                                                                                                                                                                                                                                                                                                                                                                                                                                                                                                                                                                                                                                                                                                              | RIKEN cDNA E130012A19 gene                                                                                 | Cluster0012_High in Bruce 4 embryonic stem cells |
| 1454313_at   | Egfr                                                                                                                                                                                                                                                                                                                                                                                                                                                                                                                                                                                                                                                                                                                                                                                                                                                                                                                                                                                                                                                                                                                                                                                                                                                                                                                                                                                                                                                                                                                                                                                                                                                                                                                                                                                                                                                                                                                                                                                                                                                                                                                                                                                                                                                                                                                                                                                                                                                                                                                                                                                                                                                                                                                                                                                                                                                                                                                                                                                                                                                                                                                                                                                                                                                                                                                                                                                                                                                                                                                                                                                                                                                                                                                                                                                                                                                                                                                                                                                                                                                                                                                                                                                                                                                                                                                                                                                                                                                                                                                                                                                                                                                                                                                                                                                                                                                                                                                                                                                                                                                                                                                                                                                                                                                                                                                                                                                                                                                                                                                                                                                                                                                                                                                                                                                                                                                                                                                                                                                                                                                                                                                                       | epidermal growth factor receptor                                                                           | Cluster0012_High in Bruce 4 embryonic stem cells |
| 1436799_at   | Enox1                                                                                                                                                                                                                                                                                                                                                                                                                                                                                                                                                                                                                                                                                                                                                                                                                                                                                                                                                                                                                                                                                                                                                                                                                                                                                                                                                                                                                                                                                                                                                                                                                                                                                                                                                                                                                                                                                                                                                                                                                                                                                                                                                                                                                                                                                                                                                                                                                                                                                                                                                                                                                                                                                                                                                                                                                                                                                                                                                                                                                                                                                                                                                                                                                                                                                                                                                                                                                                                                                                                                                                                                                                                                                                                                                                                                                                                                                                                                                                                                                                                                                                                                                                                                                                                                                                                                                                                                                                                                                                                                                                                                                                                                                                                                                                                                                                                                                                                                                                                                                                                                                                                                                                                                                                                                                                                                                                                                                                                                                                                                                                                                                                                                                                                                                                                                                                                                                                                                                                                                                                                                                                                                      | ecto-NOX disulfide-thiol exchanger 1                                                                       | Cluster0012_High in Bruce 4 embryonic stem cells |
| 1456511_x_at | Eras                                                                                                                                                                                                                                                                                                                                                                                                                                                                                                                                                                                                                                                                                                                                                                                                                                                                                                                                                                                                                                                                                                                                                                                                                                                                                                                                                                                                                                                                                                                                                                                                                                                                                                                                                                                                                                                                                                                                                                                                                                                                                                                                                                                                                                                                                                                                                                                                                                                                                                                                                                                                                                                                                                                                                                                                                                                                                                                                                                                                                                                                                                                                                                                                                                                                                                                                                                                                                                                                                                                                                                                                                                                                                                                                                                                                                                                                                                                                                                                                                                                                                                                                                                                                                                                                                                                                                                                                                                                                                                                                                                                                                                                                                                                                                                                                                                                                                                                                                                                                                                                                                                                                                                                                                                                                                                                                                                                                                                                                                                                                                                                                                                                                                                                                                                                                                                                                                                                                                                                                                                                                                                                                       | ES cell-expressed Ras                                                                                      | Cluster0012_High in Bruce 4 embryonic stem cells |
| 1422986_at   | Esrrb                                                                                                                                                                                                                                                                                                                                                                                                                                                                                                                                                                                                                                                                                                                                                                                                                                                                                                                                                                                                                                                                                                                                                                                                                                                                                                                                                                                                                                                                                                                                                                                                                                                                                                                                                                                                                                                                                                                                                                                                                                                                                                                                                                                                                                                                                                                                                                                                                                                                                                                                                                                                                                                                                                                                                                                                                                                                                                                                                                                                                                                                                                                                                                                                                                                                                                                                                                                                                                                                                                                                                                                                                                                                                                                                                                                                                                                                                                                                                                                                                                                                                                                                                                                                                                                                                                                                                                                                                                                                                                                                                                                                                                                                                                                                                                                                                                                                                                                                                                                                                                                                                                                                                                                                                                                                                                                                                                                                                                                                                                                                                                                                                                                                                                                                                                                                                                                                                                                                                                                                                                                                                                                                      | estrogen related receptor, beta                                                                            | Cluster0012_High in Bruce 4 embryonic stem cells |
| 1436926_at   | Esrrb                                                                                                                                                                                                                                                                                                                                                                                                                                                                                                                                                                                                                                                                                                                                                                                                                                                                                                                                                                                                                                                                                                                                                                                                                                                                                                                                                                                                                                                                                                                                                                                                                                                                                                                                                                                                                                                                                                                                                                                                                                                                                                                                                                                                                                                                                                                                                                                                                                                                                                                                                                                                                                                                                                                                                                                                                                                                                                                                                                                                                                                                                                                                                                                                                                                                                                                                                                                                                                                                                                                                                                                                                                                                                                                                                                                                                                                                                                                                                                                                                                                                                                                                                                                                                                                                                                                                                                                                                                                                                                                                                                                                                                                                                                                                                                                                                                                                                                                                                                                                                                                                                                                                                                                                                                                                                                                                                                                                                                                                                                                                                                                                                                                                                                                                                                                                                                                                                                                                                                                                                                                                                                                                      | estrogen related receptor, beta                                                                            | Cluster0012_High in Bruce 4 embryonic stem cells |
| 1435783_at   | Fam169a                                                                                                                                                                                                                                                                                                                                                                                                                                                                                                                                                                                                                                                                                                                                                                                                                                                                                                                                                                                                                                                                                                                                                                                                                                                                                                                                                                                                                                                                                                                                                                                                                                                                                                                                                                                                                                                                                                                                                                                                                                                                                                                                                                                                                                                                                                                                                                                                                                                                                                                                                                                                                                                                                                                                                                                                                                                                                                                                                                                                                                                                                                                                                                                                                                                                                                                                                                                                                                                                                                                                                                                                                                                                                                                                                                                                                                                                                                                                                                                                                                                                                                                                                                                                                                                                                                                                                                                                                                                                                                                                                                                                                                                                                                                                                                                                                                                                                                                                                                                                                                                                                                                                                                                                                                                                                                                                                                                                                                                                                                                                                                                                                                                                                                                                                                                                                                                                                                                                                                                                                                                                                                                                    | family with sequence similarity 169, member A                                                              | Cluster0012_High in Bruce 4 embryonic stem cells |
| 1427238_at   | Fbxo15                                                                                                                                                                                                                                                                                                                                                                                                                                                                                                                                                                                                                                                                                                                                                                                                                                                                                                                                                                                                                                                                                                                                                                                                                                                                                                                                                                                                                                                                                                                                                                                                                                                                                                                                                                                                                                                                                                                                                                                                                                                                                                                                                                                                                                                                                                                                                                                                                                                                                                                                                                                                                                                                                                                                                                                                                                                                                                                                                                                                                                                                                                                                                                                                                                                                                                                                                                                                                                                                                                                                                                                                                                                                                                                                                                                                                                                                                                                                                                                                                                                                                                                                                                                                                                                                                                                                                                                                                                                                                                                                                                                                                                                                                                                                                                                                                                                                                                                                                                                                                                                                                                                                                                                                                                                                                                                                                                                                                                                                                                                                                                                                                                                                                                                                                                                                                                                                                                                                                                                                                                                                                                                                     | F-box protein 15                                                                                           | Cluster0012_High in Bruce 4 embryonic stem cells |
| 1421523_at   | Fgf17                                                                                                                                                                                                                                                                                                                                                                                                                                                                                                                                                                                                                                                                                                                                                                                                                                                                                                                                                                                                                                                                                                                                                                                                                                                                                                                                                                                                                                                                                                                                                                                                                                                                                                                                                                                                                                                                                                                                                                                                                                                                                                                                                                                                                                                                                                                                                                                                                                                                                                                                                                                                                                                                                                                                                                                                                                                                                                                                                                                                                                                                                                                                                                                                                                                                                                                                                                                                                                                                                                                                                                                                                                                                                                                                                                                                                                                                                                                                                                                                                                                                                                                                                                                                                                                                                                                                                                                                                                                                                                                                                                                                                                                                                                                                                                                                                                                                                                                                                                                                                                                                                                                                                                                                                                                                                                                                                                                                                                                                                                                                                                                                                                                                                                                                                                                                                                                                                                                                                                                                                                                                                                                                      | fibroblast growth factor 17                                                                                | Cluster0012_High in Bruce 4 embryonic stem cells |
| 1456239_at   | Fgf17                                                                                                                                                                                                                                                                                                                                                                                                                                                                                                                                                                                                                                                                                                                                                                                                                                                                                                                                                                                                                                                                                                                                                                                                                                                                                                                                                                                                                                                                                                                                                                                                                                                                                                                                                                                                                                                                                                                                                                                                                                                                                                                                                                                                                                                                                                                                                                                                                                                                                                                                                                                                                                                                                                                                                                                                                                                                                                                                                                                                                                                                                                                                                                                                                                                                                                                                                                                                                                                                                                                                                                                                                                                                                                                                                                                                                                                                                                                                                                                                                                                                                                                                                                                                                                                                                                                                                                                                                                                                                                                                                                                                                                                                                                                                                                                                                                                                                                                                                                                                                                                                                                                                                                                                                                                                                                                                                                                                                                                                                                                                                                                                                                                                                                                                                                                                                                                                                                                                                                                                                                                                                                                                      | fibroblast growth factor 17                                                                                | Cluster0012_High in Bruce 4 embryonic stem cells |
| 1420085_at   | Fgf4                                                                                                                                                                                                                                                                                                                                                                                                                                                                                                                                                                                                                                                                                                                                                                                                                                                                                                                                                                                                                                                                                                                                                                                                                                                                                                                                                                                                                                                                                                                                                                                                                                                                                                                                                                                                                                                                                                                                                                                                                                                                                                                                                                                                                                                                                                                                                                                                                                                                                                                                                                                                                                                                                                                                                                                                                                                                                                                                                                                                                                                                                                                                                                                                                                                                                                                                                                                                                                                                                                                                                                                                                                                                                                                                                                                                                                                                                                                                                                                                                                                                                                                                                                                                                                                                                                                                                                                                                                                                                                                                                                                                                                                                                                                                                                                                                                                                                                                                                                                                                                                                                                                                                                                                                                                                                                                                                                                                                                                                                                                                                                                                                                                                                                                                                                                                                                                                                                                                                                                                                                                                                                                                       | fibroblast growth factor 4                                                                                 | Cluster0012_High in Bruce 4 embryonic stem cells |
| 1420086_x_at | Fgf4                                                                                                                                                                                                                                                                                                                                                                                                                                                                                                                                                                                                                                                                                                                                                                                                                                                                                                                                                                                                                                                                                                                                                                                                                                                                                                                                                                                                                                                                                                                                                                                                                                                                                                                                                                                                                                                                                                                                                                                                                                                                                                                                                                                                                                                                                                                                                                                                                                                                                                                                                                                                                                                                                                                                                                                                                                                                                                                                                                                                                                                                                                                                                                                                                                                                                                                                                                                                                                                                                                                                                                                                                                                                                                                                                                                                                                                                                                                                                                                                                                                                                                                                                                                                                                                                                                                                                                                                                                                                                                                                                                                                                                                                                                                                                                                                                                                                                                                                                                                                                                                                                                                                                                                                                                                                                                                                                                                                                                                                                                                                                                                                                                                                                                                                                                                                                                                                                                                                                                                                                                                                                                                                       | fibroblast growth factor 4                                                                                 | Cluster0012_High in Bruce 4 embryonic stem cells |
| 1450282_at   | Fgf4                                                                                                                                                                                                                                                                                                                                                                                                                                                                                                                                                                                                                                                                                                                                                                                                                                                                                                                                                                                                                                                                                                                                                                                                                                                                                                                                                                                                                                                                                                                                                                                                                                                                                                                                                                                                                                                                                                                                                                                                                                                                                                                                                                                                                                                                                                                                                                                                                                                                                                                                                                                                                                                                                                                                                                                                                                                                                                                                                                                                                                                                                                                                                                                                                                                                                                                                                                                                                                                                                                                                                                                                                                                                                                                                                                                                                                                                                                                                                                                                                                                                                                                                                                                                                                                                                                                                                                                                                                                                                                                                                                                                                                                                                                                                                                                                                                                                                                                                                                                                                                                                                                                                                                                                                                                                                                                                                                                                                                                                                                                                                                                                                                                                                                                                                                                                                                                                                                                                                                                                                                                                                                                                       | fibroblast growth factor 4                                                                                 | Cluster0012_High in Bruce 4 embryonic stem cells |
| 1434739_at   | Fmr1nb                                                                                                                                                                                                                                                                                                                                                                                                                                                                                                                                                                                                                                                                                                                                                                                                                                                                                                                                                                                                                                                                                                                                                                                                                                                                                                                                                                                                                                                                                                                                                                                                                                                                                                                                                                                                                                                                                                                                                                                                                                                                                                                                                                                                                                                                                                                                                                                                                                                                                                                                                                                                                                                                                                                                                                                                                                                                                                                                                                                                                                                                                                                                                                                                                                                                                                                                                                                                                                                                                                                                                                                                                                                                                                                                                                                                                                                                                                                                                                                                                                                                                                                                                                                                                                                                                                                                                                                                                                                                                                                                                                                                                                                                                                                                                                                                                                                                                                                                                                                                                                                                                                                                                                                                                                                                                                                                                                                                                                                                                                                                                                                                                                                                                                                                                                                                                                                                                                                                                                                                                                                                                                                                     | fragile X mental retardation 1 neighbor                                                                    | Cluster0012_High in Bruce 4 embryonic stem cells |
| 1450995_at   | Folr1                                                                                                                                                                                                                                                                                                                                                                                                                                                                                                                                                                                                                                                                                                                                                                                                                                                                                                                                                                                                                                                                                                                                                                                                                                                                                                                                                                                                                                                                                                                                                                                                                                                                                                                                                                                                                                                                                                                                                                                                                                                                                                                                                                                                                                                                                                                                                                                                                                                                                                                                                                                                                                                                                                                                                                                                                                                                                                                                                                                                                                                                                                                                                                                                                                                                                                                                                                                                                                                                                                                                                                                                                                                                                                                                                                                                                                                                                                                                                                                                                                                                                                                                                                                                                                                                                                                                                                                                                                                                                                                                                                                                                                                                                                                                                                                                                                                                                                                                                                                                                                                                                                                                                                                                                                                                                                                                                                                                                                                                                                                                                                                                                                                                                                                                                                                                                                                                                                                                                                                                                                                                                                                                      | folate receptor 1 (adult)                                                                                  | Cluster0012_High in Bruce 4 embryonic stem cells |
| 1422210_at   | Foxd3                                                                                                                                                                                                                                                                                                                                                                                                                                                                                                                                                                                                                                                                                                                                                                                                                                                                                                                                                                                                                                                                                                                                                                                                                                                                                                                                                                                                                                                                                                                                                                                                                                                                                                                                                                                                                                                                                                                                                                                                                                                                                                                                                                                                                                                                                                                                                                                                                                                                                                                                                                                                                                                                                                                                                                                                                                                                                                                                                                                                                                                                                                                                                                                                                                                                                                                                                                                                                                                                                                                                                                                                                                                                                                                                                                                                                                                                                                                                                                                                                                                                                                                                                                                                                                                                                                                                                                                                                                                                                                                                                                                                                                                                                                                                                                                                                                                                                                                                                                                                                                                                                                                                                                                                                                                                                                                                                                                                                                                                                                                                                                                                                                                                                                                                                                                                                                                                                                                                                                                                                                                                                                                                      | forkhead box D3                                                                                            | Cluster0012_High in Bruce 4 embryonic stem cells |
| 1437779_at   | Foxh1                                                                                                                                                                                                                                                                                                                                                                                                                                                                                                                                                                                                                                                                                                                                                                                                                                                                                                                                                                                                                                                                                                                                                                                                                                                                                                                                                                                                                                                                                                                                                                                                                                                                                                                                                                                                                                                                                                                                                                                                                                                                                                                                                                                                                                                                                                                                                                                                                                                                                                                                                                                                                                                                                                                                                                                                                                                                                                                                                                                                                                                                                                                                                                                                                                                                                                                                                                                                                                                                                                                                                                                                                                                                                                                                                                                                                                                                                                                                                                                                                                                                                                                                                                                                                                                                                                                                                                                                                                                                                                                                                                                                                                                                                                                                                                                                                                                                                                                                                                                                                                                                                                                                                                                                                                                                                                                                                                                                                                                                                                                                                                                                                                                                                                                                                                                                                                                                                                                                                                                                                                                                                                                                      | forkhead box H1                                                                                            | Cluster0012_High in Bruce 4 embryonic stem cells |
| 1419540_at   | Fthl17 /// Gm14499 /// Gm14511 /// Gm14512 /// Gm14513 /// Gm14514 /// Gm14515 /// Gm14516 /// Gm14517 /// Gm14518 /// Gm14519 /// Gm14520 /// Gm14521 /// Gm14522 /// Gm14523 /// Gm14524 /// Gm14525 /// Gm14526 /// Gm14527 /// Gm14528 /// Gm14529 /// Gm14530 /// Gm14531 /// Gm14532 /// Gm14533 /// Gm14534 /// Gm14535 /// Gm14536 /// Gm14537 /// Gm14538 /// Gm14539 /// Gm14540 /// Gm14541 /// Gm14542 /// Gm14543 /// Gm14544 /// Gm14545 /// Gm14546 /// Gm14547 /// Gm14548 /// Gm14549 /// Gm14550 /// Gm14551 /// Gm14552 /// Gm14553 /// Gm14554 /// Gm14555 /// Gm14556 /// Gm14557 /// Gm14558 /// Gm14559 /// Gm14560 /// Gm14561 /// Gm14562 /// Gm14563 /// Gm14564 /// Gm14565 /// Gm14566 /// Gm14567 /// Gm14568 /// Gm14569 /// Gm14570 /// Gm14571 /// Gm14572 /// Gm14573 /// Gm14574 /// Gm14575 /// Gm14576 /// Gm14577 /// Gm14578 /// Gm14579 /// Gm14580 /// Gm14581 /// Gm14582 /// Gm14583 /// Gm14584 /// Gm14585 /// Gm14586 /// Gm14587 /// Gm14588 /// Gm14589 /// Gm14590 /// Gm14591 /// Gm14592 /// Gm14593 /// Gm14594 /// Gm14595 /// Gm14596 /// Gm14597 /// Gm14598 /// Gm14599 /// Gm14600 /// Gm14601 /// Gm14602 /// Gm14603 /// Gm14604 /// Gm14605 /// Gm14606 /// Gm14607 /// Gm14608 /// Gm14609 /// Gm14610 /// Gm14611 /// Gm14612 /// Gm14613 /// Gm14614 /// Gm14615 /// Gm14616 /// Gm14617 /// Gm14618 /// Gm14619 /// Gm14620 /// Gm14621 /// Gm14622 /// Gm14623 /// Gm14624 /// Gm14625 /// Gm14626 /// Gm14627 /// Gm14628 /// Gm14629 /// Gm14630 /// Gm14631 /// Gm14632 /// Gm14633 /// Gm14634 /// Gm14635 /// Gm14636 /// Gm14637 /// Gm14638 /// Gm14639 /// Gm14640 /// Gm14641 /// Gm14642 /// Gm14643 /// Gm14644 /// Gm14645 /// Gm14646 /// Gm14647 /// Gm14648 /// Gm14649 /// Gm14650 /// Gm14651 /// Gm14652 /// Gm14653 /// Gm14654 /// Gm14655 /// Gm14656 /// Gm14657 /// Gm14658 /// Gm14659 /// Gm14660 /// Gm14661 /// Gm14662 /// Gm14663 /// Gm14664 /// Gm14665 /// Gm14666 /// Gm14667 /// Gm14668 /// Gm14669 /// Gm14670 /// Gm14671 /// Gm14672 /// Gm14673 /// Gm14674 /// Gm14675 /// Gm14676 /// Gm14677 /// Gm14678 /// Gm14679 /// Gm14680 /// Gm14681 /// Gm14682 /// Gm14683 /// Gm14684 /// Gm14685 /// Gm14686 /// Gm14687 /// Gm14688 /// Gm14689 /// Gm14690 /// Gm14691 /// Gm14692 /// Gm14693 /// Gm14694 /// Gm14695 /// Gm14696 /// Gm14697 /// Gm14698 /// Gm14699 /// Gm14700 /// Gm14701 /// Gm14702 /// Gm14703 /// Gm14704 /// Gm14705 /// Gm14706 /// Gm14707 /// Gm14708 /// Gm14709 /// Gm14710 /// Gm14711 /// Gm14712 /// Gm14713 /// Gm14714 /// Gm14715 /// Gm14716 /// Gm14717 /// Gm14718 /// Gm14719 /// Gm14720 /// Gm14721 /// Gm14722 /// Gm14723 /// Gm14724 /// Gm14725 /// Gm14726 /// Gm14727 /// Gm14728 /// Gm14729 /// Gm14730 /// Gm14731 /// Gm14732 /// Gm14733 /// Gm14734 /// Gm14735 /// Gm14736 /// Gm14737 /// Gm14738 /// Gm14739 /// Gm14740 /// Gm14741 /// Gm14742 /// Gm14743 /// Gm14744 /// Gm14745 /// Gm14746 /// Gm14747 /// Gm14748 /// Gm14749 /// Gm14750 /// Gm14751 /// Gm14752 /// Gm14753 /// Gm14754 /// Gm14755 /// Gm14756 /// Gm14757 /// Gm14758 /// Gm14759 /// Gm14760 /// Gm14761 /// Gm14762 /// Gm14763 /// Gm14764 /// Gm14765 /// Gm14766 /// Gm14767 /// Gm14768 /// Gm14769 /// Gm14770 /// Gm14771 /// Gm14772 /// Gm14773 /// Gm14774 /// Gm14775 /// Gm14776 /// Gm14777 /// Gm14778 /// Gm14779 /// Gm14780 /// Gm14781 /// Gm14782 /// Gm14783 /// Gm14784 /// Gm14785 /// Gm14786 /// Gm14787 /// Gm14788 /// Gm14789 /// Gm14790 /// Gm14791 /// Gm14792 /// Gm14793 /// Gm14794 /// Gm14795 /// Gm14796 /// Gm14797 /// Gm14798 /// Gm14799 /// Gm14800 /// Gm14801 /// Gm14802 /// Gm14803 /// Gm14804 /// Gm14805 /// Gm14806 /// Gm14807 /// Gm14808 /// Gm14809 /// Gm14810 /// Gm14811 /// Gm14812 /// Gm14813 /// Gm14814 /// Gm14815 /// Gm14816 /// Gm14817 /// Gm14818 /// Gm14819 /// Gm14820 /// Gm14821 /// Gm14822 /// Gm14823 /// Gm14824 /// Gm14825 /// Gm14826 /// Gm14827 /// Gm14828 /// Gm14829 /// Gm14830 /// Gm14831 /// Gm14832 /// Gm14833 /// Gm14834 /// Gm14835 /// Gm14836 /// Gm14837 /// Gm14838 /// Gm14839 /// Gm14840 /// Gm14841 /// Gm14842 /// Gm14843 /// Gm14844 /// Gm14845 /// Gm14846 /// Gm14847 /// Gm14848 /// Gm14849 /// Gm14850 /// Gm14851 /// Gm14852 /// Gm14853 /// Gm14854 /// Gm14855 /// Gm14856 /// Gm14857 /// Gm14858 /// Gm14859 /// Gm14860 /// Gm14861 /// Gm14862 /// Gm14863 /// Gm14864 /// Gm14865 /// Gm14866 /// Gm14867 /// Gm14868 /// Gm14869 /// Gm14870 /// Gm14871 /// Gm14872 /// Gm14873 /// Gm14874 /// Gm14875 /// Gm14876 /// Gm14877 /// Gm14878 /// Gm14879 /// Gm14880 /// Gm14881 /// Gm14882 /// Gm14883 /// Gm14884 /// Gm14885 /// Gm14886 /// Gm14887 /// Gm14888 /// Gm14889 /// Gm14890 /// Gm14891 /// Gm14892 /// Gm14893 /// Gm14894 /// Gm14895 /// Gm14896 /// Gm14897 /// Gm14898 /// Gm14899 /// Gm14900 /// Gm14901 /// Gm14902 /// Gm14903 /// Gm14904 /// Gm14905 /// Gm14906 /// Gm14907 /// Gm14908 /// Gm14909 /// Gm14910 /// Gm14911 /// Gm14912 /// Gm14913 /// Gm14914 /// Gm14915 /// Gm14916 /// Gm14917 /// Gm14918 /// Gm14919 /// Gm14920 /// Gm14921 /// Gm14922 /// Gm14923 /// Gm14924 /// Gm14925 /// Gm14926 /// Gm14927 /// Gm14928 /// Gm14929 /// Gm14930 /// Gm14931 /// Gm14932 /// Gm14933 /// Gm14934 /// Gm14935 /// Gm14936 /// Gm14937 /// Gm14938 /// Gm14939 /// Gm14940 /// Gm14941 /// Gm14942 /// Gm14943 /// Gm14944 /// Gm14945 /// Gm14946 /// Gm14947 /// Gm14948 /// Gm14949 /// Gm14950 /// Gm14951 /// Gm14952 /// Gm14953 /// Gm14954 /// Gm14955 /// Gm14956 /// Gm14957 /// Gm14958 /// Gm14959 /// Gm14960 /// Gm14961 /// Gm14962 /// Gm14963 /// Gm14964 /// Gm14965 /// Gm14966 /// Gm14967 /// Gm14968 /// Gm14969 /// Gm14970 /// Gm14971 /// Gm14972 /// Gm14973 /// Gm14974 /// Gm14975 /// Gm14976 /// Gm14977 /// Gm14978 /// Gm14979 /// Gm14980 /// Gm14981 /// Gm14982 /// Gm14983 /// Gm14984 /// Gm14985 /// Gm14986 /// Gm14987 /// Gm14988 /// Gm14989 /// Gm14990 /// Gm14991 /// Gm14992 /// Gm14993 /// Gm14994 /// Gm14995 /// Gm14996 /// Gm14997 /// Gm14998 /// Gm14999 /// Gm15000 | ferritin, heavy polypeptide-like 17 /// predicted gene 14499 /// predicted gene 14511 /// predicted gene 5 | Cluster0012_High in Bruce 4 embryonic stem cells |
| 1448814_at   | Gab1                                                                                                                                                                                                                                                                                                                                                                                                                                                                                                                                                                                                                                                                                                                                                                                                                                                                                                                                                                                                                                                                                                                                                                                                                                                                                                                                                                                                                                                                                                                                                                                                                                                                                                                                                                                                                                                                                                                                                                                                                                                                                                                                                                                                                                                                                                                                                                                                                                                                                                                                                                                                                                                                                                                                                                                                                                                                                                                                                                                                                                                                                                                                                                                                                                                                                                                                                                                                                                                                                                                                                                                                                                                                                                                                                                                                                                                                                                                                                                                                                                                                                                                                                                                                                                                                                                                                                                                                                                                                                                                                                                                                                                                                                                                                                                                                                                                                                                                                                                                                                                                                                                                                                                                                                                                                                                                                                                                                                                                                                                                                                                                                                                                                                                                                                                                                                                                                                                                                                                                                                                                                                                                                       | growth factor receptor bound protein 2-associated protein 1                                                | Cluster0012_High in Bruce 4 embryonic stem cells |
| 1420337_at   | Gbx2                                                                                                                                                                                                                                                                                                                                                                                                                                                                                                                                                                                                                                                                                                                                                                                                                                                                                                                                                                                                                                                                                                                                                                                                                                                                                                                                                                                                                                                                                                                                                                                                                                                                                                                                                                                                                                                                                                                                                                                                                                                                                                                                                                                                                                                                                                                                                                                                                                                                                                                                                                                                                                                                                                                                                                                                                                                                                                                                                                                                                                                                                                                                                                                                                                                                                                                                                                                                                                                                                                                                                                                                                                                                                                                                                                                                                                                                                                                                                                                                                                                                                                                                                                                                                                                                                                                                                                                                                                                                                                                                                                                                                                                                                                                                                                                                                                                                                                                                                                                                                                                                                                                                                                                                                                                                                                                                                                                                                                                                                                                                                                                                                                                                                                                                                                                                                                                                                                                                                                                                                                                                                                                                       | gastrulation brain homeobox 2                                                                              | Cluster0012_High in Bruce 4 embryonic stem cells |
| 1449288_at   | Gdf3                                                                                                                                                                                                                                                                                                                                                                                                                                                                                                                                                                                                                                                                                                                                                                                                                                                                                                                                                                                                                                                                                                                                                                                                                                                                                                                                                                                                                                                                                                                                                                                                                                                                                                                                                                                                                                                                                                                                                                                                                                                                                                                                                                                                                                                                                                                                                                                                                                                                                                                                                                                                                                                                                                                                                                                                                                                                                                                                                                                                                                                                                                                                                                                                                                                                                                                                                                                                                                                                                                                                                                                                                                                                                                                                                                                                                                                                                                                                                                                                                                                                                                                                                                                                                                                                                                                                                                                                                                                                                                                                                                                                                                                                                                                                                                                                                                                                                                                                                                                                                                                                                                                                                                                                                                                                                                                                                                                                                                                                                                                                                                                                                                                                                                                                                                                                                                                                                                                                                                                                                                                                                                                                       | growth differentiation factor 3                                                                            | Cluster0012_High in Bruce 4 embryonic stem cells |
| 1460057_at   | Gdf3                                                                                                                                                                                                                                                                                                                                                                                                                                                                                                                                                                                                                                                                                                                                                                                                                                                                                                                                                                                                                                                                                                                                                                                                                                                                                                                                                                                                                                                                                                                                                                                                                                                                                                                                                                                                                                                                                                                                                                                                                                                                                                                                                                                                                                                                                                                                                                                                                                                                                                                                                                                                                                                                                                                                                                                                                                                                                                                                                                                                                                                                                                                                                                                                                                                                                                                                                                                                                                                                                                                                                                                                                                                                                                                                                                                                                                                                                                                                                                                                                                                                                                                                                                                                                                                                                                                                                                                                                                                                                                                                                                                                                                                                                                                                                                                                                                                                                                                                                                                                                                                                                                                                                                                                                                                                                                                                                                                                                                                                                                                                                                                                                                                                                                                                                                                                                                                                                                                                                                                                                                                                                                                                       | growth differentiation factor 3                                                                            | Cluster0012_High in Bruce 4 embryonic stem cells |
| 1436287_at   | Gm10664                                                                                                                                                                                                                                                                                                                                                                                                                                                                                                                                                                                                                                                                                                                                                                                                                                                                                                                                                                                                                                                                                                                                                                                                                                                                                                                                                                                                                                                                                                                                                                                                                                                                                                                                                                                                                                                                                                                                                                                                                                                                                                                                                                                                                                                                                                                                                                                                                                                                                                                                                                                                                                                                                                                                                                                                                                                                                                                                                                                                                                                                                                                                                                                                                                                                                                                                                                                                                                                                                                                                                                                                                                                                                                                                                                                                                                                                                                                                                                                                                                                                                                                                                                                                                                                                                                                                                                                                                                                                                                                                                                                                                                                                                                                                                                                                                                                                                                                                                                                                                                                                                                                                                                                                                                                                                                                                                                                                                                                                                                                                                                                                                                                                                                                                                                                                                                                                                                                                                                                                                                                                                                                                    | predicted gene 10664                                                                                       | Cluster0012_High in Bruce 4 embryonic stem cells |
| 1442334_at   | Gm13040 /// Gm13043 /// Gm13057                                                                                                                                                                                                                                                                                                                                                                                                                                                                                                                                                                                                                                                                                                                                                                                                                                                                                                                                                                                                                                                                                                                                                                                                                                                                                                                                                                                                                                                                                                                                                                                                                                                                                                                                                                                                                                                                                                                                                                                                                                                                                                                                                                                                                                                                                                                                                                                                                                                                                                                                                                                                                                                                                                                                                                                                                                                                                                                                                                                                                                                                                                                                                                                                                                                                                                                                                                                                                                                                                                                                                                                                                                                                                                                                                                                                                                                                                                                                                                                                                                                                                                                                                                                                                                                                                                                                                                                                                                                                                                                                                                                                                                                                                                                                                                                                                                                                                                                                                                                                                                                                                                                                                                                                                                                                                                                                                                                                                                                                                                                                                                                                                                                                                                                                                                                                                                                                                                                                                                                                                                                                                                            | predicted gene 13040 /// predicted gene 13043 /// predicted gene 13057                                     | Cluster0012_High in Bruce 4 embryonic stem cells |
| 1438237_at   | Gm13138 /// Gm13242 /// LOC10004881                                                                                                                                                                                                                                                                                                                                                                                                                                                                                                                                                                                                                                                                                                                                                                                                                                                                                                                                                                                                                                                                                                                                                                                                                                                                                                                                                                                                                                                                                                                                                                                                                                                                                                                                                                                                                                                                                                                                                                                                                                                                                                                                                                                                                                                                                                                                                                                                                                                                                                                                                                                                                                                                                                                                                                                                                                                                                                                                                                                                                                                                                                                                                                                                                                                                                                                                                                                                                                                                                                                                                                                                                                                                                                                                                                                                                                                                                                                                                                                                                                                                                                                                                                                                                                                                                                                                                                                                                                                                                                                                                                                                                                                                                                                                                                                                                                                                                                                                                                                                                                                                                                                                                                                                                                                                                                                                                                                                                                                                                                                                                                                                                                                                                                                                                                                                                                                                                                                                                                                                                                                                                                        | predicted gene 13138 /// predicted gene 13242 /// hypothetical protein LOC10004881 /// reduced expres      | Cluster0012_High in Bruce 4 embryonic stem cells |
| 1445924_at   | Gm13151 /// Gm13235 /// Zfp534                                                                                                                                                                                                                                                                                                                                                                                                                                                                                                                                                                                                                                                                                                                                                                                                                                                                                                                                                                                                                                                                                                                                                                                                                                                                                                                                                                                                                                                                                                                                                                                                                                                                                                                                                                                                                                                                                                                                                                                                                                                                                                                                                                                                                                                                                                                                                                                                                                                                                                                                                                                                                                                                                                                                                                                                                                                                                                                                                                                                                                                                                                                                                                                                                                                                                                                                                                                                                                                                                                                                                                                                                                                                                                                                                                                                                                                                                                                                                                                                                                                                                                                                                                                                                                                                                                                                                                                                                                                                                                                                                                                                                                                                                                                                                                                                                                                                                                                                                                                                                                                                                                                                                                                                                                                                                                                                                                                                                                                                                                                                                                                                                                                                                                                                                                                                                                                                                                                                                                                                                                                                                                             | predicted gene 13151 /// predicted gene 13235 /// zinc finger protein 534                                  | Cluster0012_High in Bruce 4 embryonic stem cells |
| 1439065_x_at | Gm13152                                                                                                                                                                                                                                                                                                                                                                                                                                                                                                                                                                                                                                                                                                                                                                                                                                                                                                                                                                                                                                                                                                                                                                                                                                                                                                                                                                                                                                                                                                                                                                                                                                                                                                                                                                                                                                                                                                                                                                                                                                                                                                                                                                                                                                                                                                                                                                                                                                                                                                                                                                                                                                                                                                                                                                                                                                                                                                                                                                                                                                                                                                                                                                                                                                                                                                                                                                                                                                                                                                                                                                                                                                                                                                                                                                                                                                                                                                                                                                                                                                                                                                                                                                                                                                                                                                                                                                                                                                                                                                                                                                                                                                                                                                                                                                                                                                                                                                                                                                                                                                                                                                                                                                                                                                                                                                                                                                                                                                                                                                                                                                                                                                                                                                                                                                                                                                                                                                                                                                                                                                                                                                                                    | predicted gene 13152                                                                                       | Cluster0012_High in Bruce 4 embryonic stem cells |
| 1437678_at   | Gm1564                                                                                                                                                                                                                                                                                                                                                                                                                                                                                                                                                                                                                                                                                                                                                                                                                                                                                                                                                                                                                                                                                                                                                                                                                                                                                                                                                                                                                                                                                                                                                                                                                                                                                                                                                                                                                                                                                                                                                                                                                                                                                                                                                                                                                                                                                                                                                                                                                                                                                                                                                                                                                                                                                                                                                                                                                                                                                                                                                                                                                                                                                                                                                                                                                                                                                                                                                                                                                                                                                                                                                                                                                                                                                                                                                                                                                                                                                                                                                                                                                                                                                                                                                                                                                                                                                                                                                                                                                                                                                                                                                                                                                                                                                                                                                                                                                                                                                                                                                                                                                                                                                                                                                                                                                                                                                                                                                                                                                                                                                                                                                                                                                                                                                                                                                                                                                                                                                                                                                                                                                                                                                                                                     | predicted gene 1564                                                                                        | Cluster0012_High in Bruce 4 embryonic stem cells |
| 1439958_at   | Gm1995 /// Gm7104                                                                                                                                                                                                                                                                                                                                                                                                                                                                                                                                                                                                                                                                                                                                                                                                                                                                                                                                                                                                                                                                                                                                                                                                                                                                                                                                                                                                                                                                                                                                                                                                                                                                                                                                                                                                                                                                                                                                                                                                                                                                                                                                                                                                                                                                                                                                                                                                                                                                                                                                                                                                                                                                                                                                                                                                                                                                                                                                                                                                                                                                                                                                                                                                                                                                                                                                                                                                                                                                                                                                                                                                                                                                                                                                                                                                                                                                                                                                                                                                                                                                                                                                                                                                                                                                                                                                                                                                                                                                                                                                                                                                                                                                                                                                                                                                                                                                                                                                                                                                                                                                                                                                                                                                                                                                                                                                                                                                                                                                                                                                                                                                                                                                                                                                                                                                                                                                                                                                                                                                                                                                                                                          | REX1, RNA exonuclease 1 homolog pseudogene /// REX1, RNA exonuclease 1 homolog pseudogene                  | Cluster0012_High in Bruce 4 embryonic stem cells |
| 1450285_at   | Gm2098 /// LOC100040390 /// Ube1y1                                                                                                                                                                                                                                                                                                                                                                                                                                                                                                                                                                                                                                                                                                                                                                                                                                                                                                                                                                                                                                                                                                                                                                                                                                                                                                                                                                                                                                                                                                                                                                                                                                                                                                                                                                                                                                                                                                                                                                                                                                                                                                                                                                                                                                                                                                                                                                                                                                                                                                                                                                                                                                                                                                                                                                                                                                                                                                                                                                                                                                                                                                                                                                                                                                                                                                                                                                                                                                                                                                                                                                                                                                                                                                                                                                                                                                                                                                                                                                                                                                                                                                                                                                                                                                                                                                                                                                                                                                                                                                                                                                                                                                                                                                                                                                                                                                                                                                                                                                                                                                                                                                                                                                                                                                                                                                                                                                                                                                                                                                                                                                                                                                                                                                                                                                                                                                                                                                                                                                                                                                                                                                         | ubiquitin-activating enzyme E1, Chr Y 1 pseudogene /// similar to ubiquitin activating enzyme E1 /// ubiq  | Cluster0012_High in Bruce 4 embryonic stem cells |
| 1443961_at   | Gm4340                                                                                                                                                                                                                                                                                                                                                                                                                                                                                                                                                                                                                                                                                                                                                                                                                                                                                                                                                                                                                                                                                                                                                                                                                                                                                                                                                                                                                                                                                                                                                                                                                                                                                                                                                                                                                                                                                                                                                                                                                                                                                                                                                                                                                                                                                                                                                                                                                                                                                                                                                                                                                                                                                                                                                                                                                                                                                                                                                                                                                                                                                                                                                                                                                                                                                                                                                                                                                                                                                                                                                                                                                                                                                                                                                                                                                                                                                                                                                                                                                                                                                                                                                                                                                                                                                                                                                                                                                                                                                                                                                                                                                                                                                                                                                                                                                                                                                                                                                                                                                                                                                                                                                                                                                                                                                                                                                                                                                                                                                                                                                                                                                                                                                                                                                                                                                                                                                                                                                                                                                                                                                                                                     | predicted gene 4340                                                                                        | Cluster0012_High in Bruce 4 embryonic stem cells |
| 1456242_at   | Gm7325                                                                                                                                                                                                                                                                                                                                                                                                                                                                                                                                                                                                                                                                                                                                                                                                                                                                                                                                                                                                                                                                                                                                                                                                                                                                                                                                                                                                                                                                                                                                                                                                                                                                                                                                                                                                                                                                                                                                                                                                                                                                                                                                                                                                                                                                                                                                                                                                                                                                                                                                                                                                                                                                                                                                                                                                                                                                                                                                                                                                                                                                                                                                                                                                                                                                                                                                                                                                                                                                                                                                                                                                                                                                                                                                                                                                                                                                                                                                                                                                                                                                                                                                                                                                                                                                                                                                                                                                                                                                                                                                                                                                                                                                                                                                                                                                                                                                                                                                                                                                                                                                                                                                                                                                                                                                                                                                                                                                                                                                                                                                                                                                                                                                                                                                                                                                                                                                                                                                                                                                                                                                                                                                     | predicted gene 7325                                                                                        | Cluster0012_High in Bruce 4 embryonic stem cells |
| 1418994_at   | Gtsf1l                                                                                                                                                                                                                                                                                                                                                                                                                                                                                                                                                                                                                                                                                                                                                                                                                                                                                                                                                                                                                                                                                                                                                                                                                                                                                                                                                                                                                                                                                                                                                                                                                                                                                                                                                                                                                                                                                                                                                                                                                                                                                                                                                                                                                                                                                                                                                                                                                                                                                                                                                                                                                                                                                                                                                                                                                                                                                                                                                                                                                                                                                                                                                                                                                                                                                                                                                                                                                                                                                                                                                                                                                                                                                                                                                                                                                                                                                                                                                                                                                                                                                                                                                                                                                                                                                                                                                                                                                                                                                                                                                                                                                                                                                                                                                                                                                                                                                                                                                                                                                                                                                                                                                                                                                                                                                                                                                                                                                                                                                                                                                                                                                                                                                                                                                                                                                                                                                                                                                                                                                                                                                                                                     | gametocyte specific factor 1-like                                                                          | Cluster0012_High in Bruce 4 embryonic stem cells |
| 1437571_at   | Hic2                                                                                                                                                                                                                                                                                                                                                                                                                                                                                                                                                                                                                                                                                                                                                                                                                                                                                                                                                                                                                                                                                                                                                                                                                                                                                                                                                                                                                                                                                                                                                                                                                                                                                                                                                                                                                                                                                                                                                                                                                                                                                                                                                                                                                                                                                                                                                                                                                                                                                                                                                                                                                                                                                                                                                                                                                                                                                                                                                                                                                                                                                                                                                                                                                                                                                                                                                                                                                                                                                                                                                                                                                                                                                                                                                                                                                                                                                                                                                                                                                                                                                                                                                                                                                                                                                                                                                                                                                                                                                                                                                                                                                                                                                                                                                                                                                                                                                                                                                                                                                                                                                                                                                                                                                                                                                                                                                                                                                                                                                                                                                                                                                                                                                                                                                                                                                                                                                                                                                                                                                                                                                                                                       | hypermethylated in cancer 2                                                                                | Cluster0012_High in Bruce 4 embryonic stem cells |
| 1454944_at   | Hic2                                                                                                                                                                                                                                                                                                                                                                                                                                                                                                                                                                                                                                                                                                                                                                                                                                                                                                                                                                                                                                                                                                                                                                                                                                                                                                                                                                                                                                                                                                                                                                                                                                                                                                                                                                                                                                                                                                                                                                                                                                                                                                                                                                                                                                                                                                                                                                                                                                                                                                                                                                                                                                                                                                                                                                                                                                                                                                                                                                                                                                                                                                                                                                                                                                                                                                                                                                                                                                                                                                                                                                                                                                                                                                                                                                                                                                                                                                                                                                                                                                                                                                                                                                                                                                                                                                                                                                                                                                                                                                                                                                                                                                                                                                                                                                                                                                                                                                                                                                                                                                                                                                                                                                                                                                                                                                                                                                                                                                                                                                                                                                                                                                                                                                                                                                                                                                                                                                                                                                                                                                                                                                                                       | hypermethylated in cancer 2                                                                                | Cluster0012_High in Bruce 4 embryonic stem cells |
| 1429802_at   | Hsd17b14                                                                                                                                                                                                                                                                                                                                                                                                                                                                                                                                                                                                                                                                                                                                                                                                                                                                                                                                                                                                                                                                                                                                                                                                                                                                                                                                                                                                                                                                                                                                                                                                                                                                                                                                                                                                                                                                                                                                                                                                                                                                                                                                                                                                                                                                                                                                                                                                                                                                                                                                                                                                                                                                                                                                                                                                                                                                                                                                                                                                                                                                                                                                                                                                                                                                                                                                                                                                                                                                                                                                                                                                                                                                                                                                                                                                                                                                                                                                                                                                                                                                                                                                                                                                                                                                                                                                                                                                                                                                                                                                                                                                                                                                                                                                                                                                                                                                                                                                                                                                                                                                                                                                                                                                                                                                                                                                                                                                                                                                                                                                                                                                                                                                                                                                                                                                                                                                                                                                                                                                                                                                                                                                   | hydroxysteroid (17-beta) dehydrogenase 14                                                                  | Cluster0012_High in Bruce 4 embryonic stem cells |
| 1447678_at   | Hsd17b14                                                                                                                                                                                                                                                                                                                                                                                                                                                                                                                                                                                                                                                                                                                                                                                                                                                                                                                                                                                                                                                                                                                                                                                                                                                                                                                                                                                                                                                                                                                                                                                                                                                                                                                                                                                                                                                                                                                                                                                                                                                                                                                                                                                                                                                                                                                                                                                                                                                                                                                                                                                                                                                                                                                                                                                                                                                                                                                                                                                                                                                                                                                                                                                                                                                                                                                                                                                                                                                                                                                                                                                                                                                                                                                                                                                                                                                                                                                                                                                                                                                                                                                                                                                                                                                                                                                                                                                                                                                                                                                                                                                                                                                                                                                                                                                                                                                                                                                                                                                                                                                                                                                                                                                                                                                                                                                                                                                                                                                                                                                                                                                                                                                                                                                                                                                                                                                                                                                                                                                                                                                                                                                                   | Hydroxysteroid (17-beta) dehydrogenase 14                                                                  | Cluster0012_High in Bruce 4 embryonic stem cells |
| 1443892_at   | I1C0022H11Rik                                                                                                                                                                                                                                                                                                                                                                                                                                                                                                                                                                                                                                                                                                                                                                                                                                                                                                                                                                                                                                                                                                                                                                                                                                                                                                                                                                                                                                                                                                                                                                                                                                                                                                                                                                                                                                                                                                                                                                                                                                                                                                                                                                                                                                                                                                                                                                                                                                                                                                                                                                                                                                                                                                                                                                                                                                                                                                                                                                                                                                                                                                                                                                                                                                                                                                                                                                                                                                                                                                                                                                                                                                                                                                                                                                                                                                                                                                                                                                                                                                                                                                                                                                                                                                                                                                                                                                                                                                                                                                                                                                                                                                                                                                                                                                                                                                                                                                                                                                                                                                                                                                                                                                                                                                                                                                                                                                                                                                                                                                                                                                                                                                                                                                                                                                                                                                                                                                                                                                                                                                                                                                                              | RIKEN cDNA I1C0022H11 gene                                                                                 | Cluster0012_High in Bruce 4 embryonic stem cells |
| 1418761_at   | Igf2bp1                                                                                                                                                                                                                                                                                                                                                                                                                                                                                                                                                                                                                                                                                                                                                                                                                                                                                                                                                                                                                                                                                                                                                                                                                                                                                                                                                                                                                                                                                                                                                                                                                                                                                                                                                                                                                                                                                                                                                                                                                                                                                                                                                                                                                                                                                                                                                                                                                                                                                                                                                                                                                                                                                                                                                                                                                                                                                                                                                                                                                                                                                                                                                                                                                                                                                                                                                                                                                                                                                                                                                                                                                                                                                                                                                                                                                                                                                                                                                                                                                                                                                                                                                                                                                                                                                                                                                                                                                                                                                                                                                                                                                                                                                                                                                                                                                                                                                                                                                                                                                                                                                                                                                                                                                                                                                                                                                                                                                                                                                                                                                                                                                                                                                                                                                                                                                                                                                                                                                                                                                                                                                                                                    | insulin-like growth factor 2 mRNA binding protein 1                                                        | Cluster0012_High in Bruce 4 embryonic stem cells |
| 1449210_at   | Igf2bp1                                                                                                                                                                                                                                                                                                                                                                                                                                                                                                                                                                                                                                                                                                                                                                                                                                                                                                                                                                                                                                                                                                                                                                                                                                                                                                                                                                                                                                                                                                                                                                                                                                                                                                                                                                                                                                                                                                                                                                                                                                                                                                                                                                                                                                                                                                                                                                                                                                                                                                                                                                                                                                                                                                                                                                                                                                                                                                                                                                                                                                                                                                                                                                                                                                                                                                                                                                                                                                                                                                                                                                                                                                                                                                                                                                                                                                                                                                                                                                                                                                                                                                                                                                                                                                                                                                                                                                                                                                                                                                                                                                                                                                                                                                                                                                                                                                                                                                                                                                                                                                                                                                                                                                                                                                                                                                                                                                                                                                                                                                                                                                                                                                                                                                                                                                                                                                                                                                                                                                                                                                                                                                                                    | insulin-like growth factor 2 mRNA binding protein 1                                                        | Cluster0012_High in Bruce 4 embryonic stem cells |
| 1455223_at   | Igf2bp1                                                                                                                                                                                                                                                                                                                                                                                                                                                                                                                                                                                                                                                                                                                                                                                                                                                                                                                                                                                                                                                                                                                                                                                                                                                                                                                                                                                                                                                                                                                                                                                                                                                                                                                                                                                                                                                                                                                                                                                                                                                                                                                                                                                                                                                                                                                                                                                                                                                                                                                                                                                                                                                                                                                                                                                                                                                                                                                                                                                                                                                                                                                                                                                                                                                                                                                                                                                                                                                                                                                                                                                                                                                                                                                                                                                                                                                                                                                                                                                                                                                                                                                                                                                                                                                                                                                                                                                                                                                                                                                                                                                                                                                                                                                                                                                                                                                                                                                                                                                                                                                                                                                                                                                                                                                                                                                                                                                                                                                                                                                                                                                                                                                                                                                                                                                                                                                                                                                                                                                                                                                                                                                                    | insulin-like growth factor 2 mRNA binding protein 1                                                        | Cluster0012_High in Bruce 4 embryonic stem cells |
| 1431417_at   | Jam2                                                                                                                                                                                                                                                                                                                                                                                                                                                                                                                                                                                                                                                                                                                                                                                                                                                                                                                                                                                                                                                                                                                                                                                                                                                                                                                                                                                                                                                                                                                                                                                                                                                                                                                                                                                                                                                                                                                                                                                                                                                                                                                                                                                                                                                                                                                                                                                                                                                                                                                                                                                                                                                                                                                                                                                                                                                                                                                                                                                                                                                                                                                                                                                                                                                                                                                                                                                                                                                                                                                                                                                                                                                                                                                                                                                                                                                                                                                                                                                                                                                                                                                                                                                                                                                                                                                                                                                                                                                                                                                                                                                                                                                                                                                                                                                                                                                                                                                                                                                                                                                                                                                                                                                                                                                                                                                                                                                                                                                                                                                                                                                                                                                                                                                                                                                                                                                                                                                                                                                                                                                                                                                                       | junction adhesion molecule 2                                                                               | Cluster0012_High in Bruce 4 embryonic stem cells |
| 1450710_at   | Jarid2                                                                                                                                                                                                                                                                                                                                                                                                                                                                                                                                                                                                                                                                                                                                                                                                                                                                                                                                                                                                                                                                                                                                                                                                                                                                                                                                                                                                                                                                                                                                                                                                                                                                                                                                                                                                                                                                                                                                                                                                                                                                                                                                                                                                                                                                                                                                                                                                                                                                                                                                                                                                                                                                                                                                                                                                                                                                                                                                                                                                                                                                                                                                                                                                                                                                                                                                                                                                                                                                                                                                                                                                                                                                                                                                                                                                                                                                                                                                                                                                                                                                                                                                                                                                                                                                                                                                                                                                                                                                                                                                                                                                                                                                                                                                                                                                                                                                                                                                                                                                                                                                                                                                                                                                                                                                                                                                                                                                                                                                                                                                                                                                                                                                                                                                                                                                                                                                                                                                                                                                                                                                                                                                     | jumonji, AT rich interactive domain 2                                                                      | Cluster0012_High in Bruce 4 embryonic stem cells |
| 1427143_at   | Kdm5b                                                                                                                                                                                                                                                                                                                                                                                                                                                                                                                                                                                                                                                                                                                                                                                                                                                                                                                                                                                                                                                                                                                                                                                                                                                                                                                                                                                                                                                                                                                                                                                                                                                                                                                                                                                                                                                                                                                                                                                                                                                                                                                                                                                                                                                                                                                                                                                                                                                                                                                                                                                                                                                                                                                                                                                                                                                                                                                                                                                                                                                                                                                                                                                                                                                                                                                                                                                                                                                                                                                                                                                                                                                                                                                                                                                                                                                                                                                                                                                                                                                                                                                                                                                                                                                                                                                                                                                                                                                                                                                                                                                                                                                                                                                                                                                                                                                                                                                                                                                                                                                                                                                                                                                                                                                                                                                                                                                                                                                                                                                                                                                                                                                                                                                                                                                                                                                                                                                                                                                                                                                                                                                                      | lysine (K)-specific demethylase 5B                                                                         | Cluster0012_High in Bruce 4 embryonic stem cells |
| 1430208_at   | Krt42                                                                                                                                                                                                                                                                                                                                                                                                                                                                                                                                                                                                                                                                                                                                                                                                                                                                                                                                                                                                                                                                                                                                                                                                                                                                                                                                                                                                                                                                                                                                                                                                                                                                                                                                                                                                                                                                                                                                                                                                                                                                                                                                                                                                                                                                                                                                                                                                                                                                                                                                                                                                                                                                                                                                                                                                                                                                                                                                                                                                                                                                                                                                                                                                                                                                                                                                                                                                                                                                                                                                                                                                                                                                                                                                                                                                                                                                                                                                                                                                                                                                                                                                                                                                                                                                                                                                                                                                                                                                                                                                                                                                                                                                                                                                                                                                                                                                                                                                                                                                                                                                                                                                                                                                                                                                                                                                                                                                                                                                                                                                                                                                                                                                                                                                                                                                                                                                                                                                                                                                                                                                                                                                      | keratin 42                                                                                                 | Cluster0012_High in Bruce 4 embryonic stem cells |
| 1457314_at   | L1td1                                                                                                                                                                                                                                                                                                                                                                                                                                                                                                                                                                                                                                                                                                                                                                                                                                                                                                                                                                                                                                                                                                                                                                                                                                                                                                                                                                                                                                                                                                                                                                                                                                                                                                                                                                                                                                                                                                                                                                                                                                                                                                                                                                                                                                                                                                                                                                                                                                                                                                                                                                                                                                                                                                                                                                                                                                                                                                                                                                                                                                                                                                                                                                                                                                                                                                                                                                                                                                                                                                                                                                                                                                                                                                                                                                                                                                                                                                                                                                                                                                                                                                                                                                                                                                                                                                                                                                                                                                                                                                                                                                                                                                                                                                                                                                                                                                                                                                                                                                                                                                                                                                                                                                                                                                                                                                                                                                                                                                                                                                                                                                                                                                                                                                                                                                                                                                                                                                                                                                                                                                                                                                                                      | LINE-1 type transposase domain containing 1                                                                | Cluster0012_High in Bruce 4 embryonic stem cells |
| 1418153_at   | Lama1                                                                                                                                                                                                                                                                                                                                                                                                                                                                                                                                                                                                                                                                                                                                                                                                                                                                                                                                                                                                                                                                                                                                                                                                                                                                                                                                                                                                                                                                                                                                                                                                                                                                                                                                                                                                                                                                                                                                                                                                                                                                                                                                                                                                                                                                                                                                                                                                                                                                                                                                                                                                                                                                                                                                                                                                                                                                                                                                                                                                                                                                                                                                                                                                                                                                                                                                                                                                                                                                                                                                                                                                                                                                                                                                                                                                                                                                                                                                                                                                                                                                                                                                                                                                                                                                                                                                                                                                                                                                                                                                                                                                                                                                                                                                                                                                                                                                                                                                                                                                                                                                                                                                                                                                                                                                                                                                                                                                                                                                                                                                                                                                                                                                                                                                                                                                                                                                                                                                                                                                                                                                                                                                      | laminin, alpha 1                                                                                           | Cluster0012_High in Bruce 4 embryonic stem cells |
| 1417638_at   | Lefty1                                                                                                                                                                                                                                                                                                                                                                                                                                                                                                                                                                                                                                                                                                                                                                                                                                                                                                                                                                                                                                                                                                                                                                                                                                                                                                                                                                                                                                                                                                                                                                                                                                                                                                                                                                                                                                                                                                                                                                                                                                                                                                                                                                                                                                                                                                                                                                                                                                                                                                                                                                                                                                                                                                                                                                                                                                                                                                                                                                                                                                                                                                                                                                                                                                                                                                                                                                                                                                                                                                                                                                                                                                                                                                                                                                                                                                                                                                                                                                                                                                                                                                                                                                                                                                                                                                                                                                                                                                                                                                                                                                                                                                                                                                                                                                                                                                                                                                                                                                                                                                                                                                                                                                                                                                                                                                                                                                                                                                                                                                                                                                                                                                                                                                                                                                                                                                                                                                                                                                                                                                                                                                                                     | left right determination factor 1                                                                          | Cluster0012_High in Bruce 4 embryonic stem cells |
| 1436227_at   | Lefty2                                                                                                                                                                                                                                                                                                                                                                                                                                                                                                                                                                                                                                                                                                                                                                                                                                                                                                                                                                                                                                                                                                                                                                                                                                                                                                                                                                                                                                                                                                                                                                                                                                                                                                                                                                                                                                                                                                                                                                                                                                                                                                                                                                                                                                                                                                                                                                                                                                                                                                                                                                                                                                                                                                                                                                                                                                                                                                                                                                                                                                                                                                                                                                                                                                                                                                                                                                                                                                                                                                                                                                                                                                                                                                                                                                                                                                                                                                                                                                                                                                                                                                                                                                                                                                                                                                                                                                                                                                                                                                                                                                                                                                                                                                                                                                                                                                                                                                                                                                                                                                                                                                                                                                                                                                                                                                                                                                                                                                                                                                                                                                                                                                                                                                                                                                                                                                                                                                                                                                                                                                                                                                                                     | left-right determination factor 2                                                                          | Cluster0012_High in Bruce 4 embryonic stem cells |
| 1421749_at   | Lin28                                                                                                                                                                                                                                                                                                                                                                                                                                                                                                                                                                                                                                                                                                                                                                                                                                                                                                                                                                                                                                                                                                                                                                                                                                                                                                                                                                                                                                                                                                                                                                                                                                                                                                                                                                                                                                                                                                                                                                                                                                                                                                                                                                                                                                                                                                                                                                                                                                                                                                                                                                                                                                                                                                                                                                                                                                                                                                                                                                                                                                                                                                                                                                                                                                                                                                                                                                                                                                                                                                                                                                                                                                                                                                                                                                                                                                                                                                                                                                                                                                                                                                                                                                                                                                                                                                                                                                                                                                                                                                                                                                                                                                                                                                                                                                                                                                                                                                                                                                                                                                                                                                                                                                                                                                                                                                                                                                                                                                                                                                                                                                                                                                                                                                                                                                                                                                                                                                                                                                                                                                                                                                                                      | Lin-28 homolog (C. elegans)                                                                                | Cluster0012_High in Bruce 4 embryonic stem cells |
| 1437752_at   | Lin28a                                                                                                                                                                                                                                                                                                                                                                                                                                                                                                                                                                                                                                                                                                                                                                                                                                                                                                                                                                                                                                                                                                                                                                                                                                                                                                                                                                                                                                                                                                                                                                                                                                                                                                                                                                                                                                                                                                                                                                                                                                                                                                                                                                                                                                                                                                                                                                                                                                                                                                                                                                                                                                                                                                                                                                                                                                                                                                                                                                                                                                                                                                                                                                                                                                                                                                                                                                                                                                                                                                                                                                                                                                                                                                                                                                                                                                                                                                                                                                                                                                                                                                                                                                                                                                                                                                                                                                                                                                                                                                                                                                                                                                                                                                                                                                                                                                                                                                                                                                                                                                                                                                                                                                                                                                                                                                                                                                                                                                                                                                                                                                                                                                                                                                                                                                                                                                                                                                                                                                                                                                                                                                                                     | lin-28 homolog A (C. elegans)                                                                              | Cluster0012_High in Bruce 4 embryonic stem cells |

|              |                         |                                                                                                             |                                                  |
|--------------|-------------------------|-------------------------------------------------------------------------------------------------------------|--------------------------------------------------|
| 1425220_x_at | LOC100038935            | hypothetical protein LOC100038935                                                                           | Cluster0012_High in Bruce 4 embryonic stem cells |
| 1429343_at   | LOC100046433 /// Rbmxl2 | similar to testes-specific heterogenous nuclear ribonucleoprotein G-T /// RNA binding motif protein, X-link | Cluster0012_High in Bruce 4 embryonic stem cells |
| 1444292_at   | LOC100303645            | hypothetical LOC100303645                                                                                   | Cluster0012_High in Bruce 4 embryonic stem cells |
| 1427133_s_at | Lrp2                    | low density lipoprotein receptor-related protein 2                                                          | Cluster0012_High in Bruce 4 embryonic stem cells |
| 1452320_at   | Lrp2                    | low density lipoprotein receptor-related protein 2                                                          | Cluster0012_High in Bruce 4 embryonic stem cells |
| 1427388_at   | Lrrc2                   | leucine rich repeat containing 2                                                                            | Cluster0012_High in Bruce 4 embryonic stem cells |
| 1453628_s_at | Lrrc2                   | leucine rich repeat containing 2                                                                            | Cluster0012_High in Bruce 4 embryonic stem cells |
| 1436837_at   | Mael                    | maelstrom homolog (Drosophila)                                                                              | Cluster0012_High in Bruce 4 embryonic stem cells |
| 1429701_at   | Mageb16                 | melanoma antigen family B, 16                                                                               | Cluster0012_High in Bruce 4 embryonic stem cells |
| 1419021_at   | Mcf2                    | mcf.2 transforming sequence                                                                                 | Cluster0012_High in Bruce 4 embryonic stem cells |
| 1419418_a_at | Morc1                   | microrchidia 1                                                                                              | Cluster0012_High in Bruce 4 embryonic stem cells |
| 1416915_at   | Msh6                    | mutS homolog 6 (E. coli)                                                                                    | Cluster0012_High in Bruce 4 embryonic stem cells |
| 1454904_at   | Mtm1                    | X-linked myotubular myopathy gene 1                                                                         | Cluster0012_High in Bruce 4 embryonic stem cells |
| 1417656_at   | Mybl2                   | myeloblastosis oncogene-like 2                                                                              | Cluster0012_High in Bruce 4 embryonic stem cells |
| 1454946_at   | Mybl2                   | myeloblastosis oncogene-like 2                                                                              | Cluster0012_High in Bruce 4 embryonic stem cells |
| 1423508_at   | Myst4                   | MYST histone acetyltransferase monocytic leukemia 4                                                         | Cluster0012_High in Bruce 4 embryonic stem cells |
| 1434029_at   | NA                      | ---                                                                                                         | Cluster0012_High in Bruce 4 embryonic stem cells |
| 1440752_at   | NA                      | ---                                                                                                         | Cluster0012_High in Bruce 4 embryonic stem cells |
| 1441011_at   | NA                      | ---                                                                                                         | Cluster0012_High in Bruce 4 embryonic stem cells |
| 1444496_at   | NA                      | ---                                                                                                         | Cluster0012_High in Bruce 4 embryonic stem cells |
| 1445368_at   | NA                      | ---                                                                                                         | Cluster0012_High in Bruce 4 embryonic stem cells |
| 1447021_at   | NA                      | ---                                                                                                         | Cluster0012_High in Bruce 4 embryonic stem cells |
| 1456673_at   | NA                      | ---                                                                                                         | Cluster0012_High in Bruce 4 embryonic stem cells |
| 1437786_at   | Naa11                   | N(alpha)-acetyltransferase 11, NatA catalytic subunit                                                       | Cluster0012_High in Bruce 4 embryonic stem cells |
| 1429388_at   | Nanog                   | Nanog homeobox                                                                                              | Cluster0012_High in Bruce 4 embryonic stem cells |
| 1416043_at   | Nasp                    | nuclear autoantigenic sperm protein (histone-binding)                                                       | Cluster0012_High in Bruce 4 embryonic stem cells |
| 1430233_a_at | Nhedc1                  | Na+/H+ exchanger domain containing 1                                                                        | Cluster0012_High in Bruce 4 embryonic stem cells |
| 1454114_a_at | Nhedc1                  | Na+/H+ exchanger domain containing 1                                                                        | Cluster0012_High in Bruce 4 embryonic stem cells |
| 1422057_at   | Nodal                   | nodal                                                                                                       | Cluster0012_High in Bruce 4 embryonic stem cells |
| 1422058_at   | Nodal                   | nodal                                                                                                       | Cluster0012_High in Bruce 4 embryonic stem cells |
| 1422142_at   | Nphs1                   | nephrosis 1 homolog, nephrin (human)                                                                        | Cluster0012_High in Bruce 4 embryonic stem cells |
| 1417760_at   | Nr0b1                   | nuclear receptor subfamily 0, group B, member 1                                                             | Cluster0012_High in Bruce 4 embryonic stem cells |
| 1460471_at   | Ooep                    | oocyte expressed protein homolog (dog)                                                                      | Cluster0012_High in Bruce 4 embryonic stem cells |
| 1425926_a_at | Otx2                    | orthodenticle homolog 2 (Drosophila)                                                                        | Cluster0012_High in Bruce 4 embryonic stem cells |
| 1421113_at   | Pga5                    | pepsinogen 5, group I                                                                                       | Cluster0012_High in Bruce 4 embryonic stem cells |
| 1423212_at   | Phc1                    | polyhomeotic-like 1 (Drosophila)                                                                            | Cluster0012_High in Bruce 4 embryonic stem cells |
| 1426753_at   | Phf17                   | PHD finger protein 17                                                                                       | Cluster0012_High in Bruce 4 embryonic stem cells |
| 1417837_at   | Phlda2                  | pleckstrin homology-like domain, family A, member 2                                                         | Cluster0012_High in Bruce 4 embryonic stem cells |
| 1441098_at   | Pnlcd1                  | poly(A)-specific ribonuclease (PARN)-like domain containing 1                                               | Cluster0012_High in Bruce 4 embryonic stem cells |
| 1437588_at   | Pou4f2                  | POU domain, class 4, transcription factor 2                                                                 | Cluster0012_High in Bruce 4 embryonic stem cells |
| 1417945_at   | Pou5f1                  | POU domain, class 5, transcription factor 1                                                                 | Cluster0012_High in Bruce 4 embryonic stem cells |
| 1428459_at   | Pramef12                | PRAME family member 12                                                                                      | Cluster0012_High in Bruce 4 embryonic stem cells |
| 1422655_at   | Ptch2                   | patched homolog 2                                                                                           | Cluster0012_High in Bruce 4 embryonic stem cells |
| 1421020_at   | Ranbp17                 | RAN binding protein 17                                                                                      | Cluster0012_High in Bruce 4 embryonic stem cells |
| 1443844_at   | Rhox13                  | reproductive homeobox 13                                                                                    | Cluster0012_High in Bruce 4 embryonic stem cells |
| 1425708_at   | Rnf17                   | ring finger protein 17                                                                                      | Cluster0012_High in Bruce 4 embryonic stem cells |
| 1438820_at   | Rnf17                   | ring finger protein 17                                                                                      | Cluster0012_High in Bruce 4 embryonic stem cells |
| 1448845_at   | Rpp25                   | ribonuclease P 25 subunit (human)                                                                           | Cluster0012_High in Bruce 4 embryonic stem cells |
| 1452730_at   | Rps4y2                  | ribosomal protein S4, Y-linked 2                                                                            | Cluster0012_High in Bruce 4 embryonic stem cells |
| 1429759_at   | Rps6ka6                 | ribosomal protein S6 kinase polypeptide 6                                                                   | Cluster0012_High in Bruce 4 embryonic stem cells |
| 1450489_at   | Sall1                   | sal-like 1 (Drosophila)                                                                                     | Cluster0012_High in Bruce 4 embryonic stem cells |
| 1424152_at   | Sall4                   | sal-like 4 (Drosophila)                                                                                     | Cluster0012_High in Bruce 4 embryonic stem cells |
| 1424153_s_at | Sall4                   | sal-like 4 (Drosophila)                                                                                     | Cluster0012_High in Bruce 4 embryonic stem cells |
| 1448866_at   | Senp3                   | SUMO/sentrin specific peptidase 3                                                                           | Cluster0012_High in Bruce 4 embryonic stem cells |
| 1420366_at   | Spesp1                  | sperm equatorial segment protein 1                                                                          | Cluster0012_High in Bruce 4 embryonic stem cells |
| 1440867_at   | Spry4                   | sprouty homolog 4 (Drosophila)                                                                              | Cluster0012_High in Bruce 4 embryonic stem cells |
| 1425317_x_at | Stk31                   | serine threonine kinase 31                                                                                  | Cluster0012_High in Bruce 4 embryonic stem cells |

|              |                                           |                                                                                                                   |                                                     |
|--------------|-------------------------------------------|-------------------------------------------------------------------------------------------------------------------|-----------------------------------------------------|
| 1454138_a_at | Stk31                                     | serine threonine kinase 31                                                                                        | Cluster0012_High in Bruce 4 embryonic stem cells    |
| 1420568_at   | Stra8                                     | stimulated by retinoic acid gene 8                                                                                | Cluster0012_High in Bruce 4 embryonic stem cells    |
| 1428685_at   | Syce1                                     | synaptonemal complex central element protein 1                                                                    | Cluster0012_High in Bruce 4 embryonic stem cells    |
| 1449534_at   | Sycp3                                     | synaptonemal complex protein 3                                                                                    | Cluster0012_High in Bruce 4 embryonic stem cells    |
| 1423169_at   | Taf7                                      | TAF7 RNA polymerase II, TATA box binding protein (TBP)-associated factor                                          | Cluster0012_High in Bruce 4 embryonic stem cells    |
| 1423170_at   | Taf7                                      | TAF7 RNA polymerase II, TATA box binding protein (TBP)-associated factor                                          | Cluster0012_High in Bruce 4 embryonic stem cells    |
| 1449592_at   | Tcf15                                     | transcription factor 15                                                                                           | Cluster0012_High in Bruce 4 embryonic stem cells    |
| 1418147_at   | Tcfap2c                                   | transcription factor AP-2, gamma                                                                                  | Cluster0012_High in Bruce 4 embryonic stem cells    |
| 1436392_s_at | Tcfap2c                                   | transcription factor AP-2, gamma                                                                                  | Cluster0012_High in Bruce 4 embryonic stem cells    |
| 1448977_at   | Tcfap2c                                   | transcription factor AP-2, gamma                                                                                  | Cluster0012_High in Bruce 4 embryonic stem cells    |
| 1422458_at   | Tcl1                                      | T-cell lymphoma breakpoint 1                                                                                      | Cluster0012_High in Bruce 4 embryonic stem cells    |
| 1450989_at   | Tdgf1                                     | teratocarcinoma-derived growth factor 1                                                                           | Cluster0012_High in Bruce 4 embryonic stem cells    |
| 1449064_at   | Tdh                                       | L-threonine dehydrogenase                                                                                         | Cluster0012_High in Bruce 4 embryonic stem cells    |
| 1453219_a_at | Tdrd12                                    | tudor domain containing 12                                                                                        | Cluster0012_High in Bruce 4 embryonic stem cells    |
| 1419896_at   | Tet1                                      | tet oncogene 1                                                                                                    | Cluster0012_High in Bruce 4 embryonic stem cells    |
| 1429448_s_at | Tet1                                      | tet oncogene 1                                                                                                    | Cluster0012_High in Bruce 4 embryonic stem cells    |
| 1455425_at   | Tet1                                      | tet oncogene 1                                                                                                    | Cluster0012_High in Bruce 4 embryonic stem cells    |
| 1419729_at   | Tex11                                     | testis expressed gene 11                                                                                          | Cluster0012_High in Bruce 4 embryonic stem cells    |
| 1419240_at   | Tex14                                     | testis expressed gene 14                                                                                          | Cluster0012_High in Bruce 4 embryonic stem cells    |
| 1417482_at   | Tex19.1                                   | testis expressed gene 19.1                                                                                        | Cluster0012_High in Bruce 4 embryonic stem cells    |
| 1460226_at   | Trap1a                                    | tumor rejection antigen P1A                                                                                       | Cluster0012_High in Bruce 4 embryonic stem cells    |
| 1418756_at   | Trh                                       | thyrotropin releasing hormone                                                                                     | Cluster0012_High in Bruce 4 embryonic stem cells    |
| 1424448_at   | Trim6                                     | tripartite motif-containing 6                                                                                     | Cluster0012_High in Bruce 4 embryonic stem cells    |
| 1453599_at   | Trim71                                    | tripartite motif-containing 71                                                                                    | Cluster0012_High in Bruce 4 embryonic stem cells    |
| 1438872_at   | Triml1                                    | tripartite motif family-like 1                                                                                    | Cluster0012_High in Bruce 4 embryonic stem cells    |
| 1416899_at   | Utf1                                      | undifferentiated embryonic cell transcription factor 1                                                            | Cluster0012_High in Bruce 4 embryonic stem cells    |
| 1443786_at   | Utf1                                      | undifferentiated embryonic cell transcription factor 1                                                            | Cluster0012_High in Bruce 4 embryonic stem cells    |
| 1428401_at   | Zcchc3                                    | zinc finger, CCHC domain containing 3                                                                             | Cluster0012_High in Bruce 4 embryonic stem cells    |
| 1424301_at   | Zfp219                                    | zinc finger protein 219                                                                                           | Cluster0012_High in Bruce 4 embryonic stem cells    |
| 1418362_at   | Zfp42                                     | zinc finger protein 42                                                                                            | Cluster0012_High in Bruce 4 embryonic stem cells    |
| 1457078_at   | Zfp473                                    | zinc finger protein 473                                                                                           | Cluster0012_High in Bruce 4 embryonic stem cells    |
| 1435091_at   | Zfp568                                    | zinc finger protein 568                                                                                           | Cluster0012_High in Bruce 4 embryonic stem cells    |
| 1459929_at   | Zfp568                                    | zinc finger protein 568                                                                                           | Cluster0012_High in Bruce 4 embryonic stem cells    |
| 1450929_at   | Zfp57                                     | zinc finger protein 57                                                                                            | Cluster0012_High in Bruce 4 embryonic stem cells    |
| 1431865_a_at | Zfp819                                    | zinc finger protein 819                                                                                           | Cluster0012_High in Bruce 4 embryonic stem cells    |
| 1423424_at   | Zic3                                      | zinc finger protein of the cerebellum 3                                                                           | Cluster0012_High in Bruce 4 embryonic stem cells    |
| 1438737_at   | Zic3                                      | zinc finger protein of the cerebellum 3                                                                           | Cluster0012_High in Bruce 4 embryonic stem cells    |
| 1428052_a_at | Zmym1                                     | zinc finger, MYM domain containing 1                                                                              | Cluster0012_High in Bruce 4 embryonic stem cells    |
| 1438787_at   | Zscan10                                   | zinc finger and SCAN domain containing 10                                                                         | Cluster0012_High in Bruce 4 embryonic stem cells    |
| 1457033_at   | Zscan4-ps2 /// Zscan4-ps3 /// Zscan4a /// | zinc finger and SCAN domain containing 4, pseudogene 2 /// zinc finger and SCAN domain containing 4, pseudogene 2 | Cluster0012_High in Bruce 4 embryonic stem cells    |
| 1455288_at   | 1110036O03Rik                             | RIKEN cDNA 1110036O03 gene                                                                                        | Cluster0012_High in Bruce 4 embryonic stem cells    |
| 1460626_at   |                                           | Sep-11 septin 11                                                                                                  | Cluster0013_Mesenchyme-related/extracellular matrix |
| 1457260_at   | 5730409E04Rik                             | RIKEN cDNA 5730409E04Rik gene                                                                                     | Cluster0013_Mesenchyme-related/extracellular matrix |
| 1448460_at   | Acvr1                                     | activin A receptor, type 1                                                                                        | Cluster0013_Mesenchyme-related/extracellular matrix |
| 1439827_at   | Adamts12                                  | a disintegrin-like and metalloproteinase (reprolysin type) with thrombospondin type 1 motif, 12                   | Cluster0013_Mesenchyme-related/extracellular matrix |
| 1422514_at   | Aebp1                                     | AE binding protein 1                                                                                              | Cluster0013_Mesenchyme-related/extracellular matrix |
| 1450637_a_at | Aebp1                                     | AE binding protein 1                                                                                              | Cluster0013_Mesenchyme-related/extracellular matrix |
| 1456361_at   | Afap1                                     | actin filament associated protein 1                                                                               | Cluster0013_Mesenchyme-related/extracellular matrix |
| 1422184_a_at | Ak1                                       | adenylate kinase 1                                                                                                | Cluster0013_Mesenchyme-related/extracellular matrix |
| 1416405_at   | Bgn                                       | biglycan                                                                                                          | Cluster0013_Mesenchyme-related/extracellular matrix |
| 1437889_x_at | Bgn                                       | biglycan                                                                                                          | Cluster0013_Mesenchyme-related/extracellular matrix |
| 1448323_a_at | Bgn                                       | biglycan                                                                                                          | Cluster0013_Mesenchyme-related/extracellular matrix |
| 1431856_a_at | C1qtnf6                                   | C1q and tumor necrosis factor related protein 6                                                                   | Cluster0013_Mesenchyme-related/extracellular matrix |
| 1440397_at   | Cacna2d1                                  | calcium channel, voltage-dependent, alpha2/delta subunit 1                                                        | Cluster0013_Mesenchyme-related/extracellular matrix |
| 1424768_at   | Cald1                                     | caldesmon 1                                                                                                       | Cluster0013_Mesenchyme-related/extracellular matrix |
| 1424769_s_at | Cald1                                     | caldesmon 1                                                                                                       | Cluster0013_Mesenchyme-related/extracellular matrix |
| 1418981_at   | Casp12                                    | caspase 12                                                                                                        | Cluster0013_Mesenchyme-related/extracellular matrix |

|              |            |                                                       |                                                     |
|--------------|------------|-------------------------------------------------------|-----------------------------------------------------|
| 1424186_at   | Ccdc80     | coiled-coil domain containing 80                      | Cluster0013_Mesenchyme-related/extracellular matrix |
| 1417439_at   | Cd248      | CD248 antigen, endosialin                             | Cluster0013_Mesenchyme-related/extracellular matrix |
| 1454023_a_at | Chpf       | chondroitin polymerizing factor                       | Cluster0013_Mesenchyme-related/extracellular matrix |
| 1429417_at   | Chsy3      | chondroitin sulfate synthase 3                        | Cluster0013_Mesenchyme-related/extracellular matrix |
| 1426755_at   | Ckap4      | cytoskeleton-associated protein 4                     | Cluster0013_Mesenchyme-related/extracellular matrix |
| 1455019_x_at | Ckap4      | cytoskeleton-associated protein 4                     | Cluster0013_Mesenchyme-related/extracellular matrix |
| 1427986_a_at | Col16a1    | collagen, type XVI, alpha 1                           | Cluster0013_Mesenchyme-related/extracellular matrix |
| 1423669_at   | Col1a1     | collagen, type I, alpha 1                             | Cluster0013_Mesenchyme-related/extracellular matrix |
| 1423110_at   | Col1a2     | collagen, type I, alpha 2                             | Cluster0013_Mesenchyme-related/extracellular matrix |
| 1450857_a_at | Col1a2     | collagen, type I, alpha 2                             | Cluster0013_Mesenchyme-related/extracellular matrix |
| 1427883_a_at | Col3a1     | collagen, type III, alpha 1                           | Cluster0013_Mesenchyme-related/extracellular matrix |
| 1416740_at   | Col5a1     | collagen, type V, alpha 1                             | Cluster0013_Mesenchyme-related/extracellular matrix |
| 1434479_at   | Col5a1     | collagen, type V, alpha 1                             | Cluster0013_Mesenchyme-related/extracellular matrix |
| 1422437_at   | Col5a2     | collagen, type V, alpha 2                             | Cluster0013_Mesenchyme-related/extracellular matrix |
| 1419703_at   | Col5a3     | collagen, type V, alpha 3                             | Cluster0013_Mesenchyme-related/extracellular matrix |
| 1448590_at   | Col6a1     | collagen, type VI, alpha 1                            | Cluster0013_Mesenchyme-related/extracellular matrix |
| 1426947_x_at | Col6a2     | collagen, type VI, alpha 2                            | Cluster0013_Mesenchyme-related/extracellular matrix |
| 1452250_a_at | Col6a2     | collagen, type VI, alpha 2                            | Cluster0013_Mesenchyme-related/extracellular matrix |
| 1424131_at   | Col6a3     | collagen, type VI, alpha 3                            | Cluster0013_Mesenchyme-related/extracellular matrix |
| 1448592_at   | Crtap      | cartilage associated protein                          | Cluster0013_Mesenchyme-related/extracellular matrix |
| 1416612_at   | Cyp1b1     | cytochrome P450, family 1, subfamily b, polypeptide 1 | Cluster0013_Mesenchyme-related/extracellular matrix |
| 1416613_at   | Cyp1b1     | cytochrome P450, family 1, subfamily b, polypeptide 1 | Cluster0013_Mesenchyme-related/extracellular matrix |
| 1419978_s_at | D10Ert610e | DNA segment, Chr 10, ERATO Doi 610, expressed         | Cluster0013_Mesenchyme-related/extracellular matrix |
| 1449687_at   | D10Ert610e | DNA segment, Chr 10, ERATO Doi 610, expressed         | Cluster0013_Mesenchyme-related/extracellular matrix |
| 1455688_at   | Ddr2       | discoidin domain receptor family, member 2            | Cluster0013_Mesenchyme-related/extracellular matrix |
| 1427298_at   | Dnm3os     | dynamin 3, opposite strand                            | Cluster0013_Mesenchyme-related/extracellular matrix |
| 1438407_at   | Dsel       | dermatan sulfate epimerase-like                       | Cluster0013_Mesenchyme-related/extracellular matrix |
| 1417272_at   | Fam114a1   | family with sequence similarity 114, member A1        | Cluster0013_Mesenchyme-related/extracellular matrix |
| 1441904_x_at | Fam114a1   | family with sequence similarity 114, member A1        | Cluster0013_Mesenchyme-related/extracellular matrix |
| 1448648_at   | Fam114a1   | family with sequence similarity 114, member A1        | Cluster0013_Mesenchyme-related/extracellular matrix |
| 1437639_at   | Fam115a    | family with sequence similarity 115, member A         | Cluster0013_Mesenchyme-related/extracellular matrix |
| 1437950_at   | Fam149a    | family with sequence similarity 149, member A         | Cluster0013_Mesenchyme-related/extracellular matrix |
| 1425896_a_at | Fbn1       | fibrillin 1                                           | Cluster0013_Mesenchyme-related/extracellular matrix |
| 1460208_at   | Fbn1       | fibrillin 1                                           | Cluster0013_Mesenchyme-related/extracellular matrix |
| 1421746_a_at | Fbxo17     | F-box protein 17                                      | Cluster0013_Mesenchyme-related/extracellular matrix |
| 1424050_s_at | Fgfr1      | fibroblast growth factor receptor 1                   | Cluster0013_Mesenchyme-related/extracellular matrix |
| 1425911_a_at | Fgfr1      | fibroblast growth factor receptor 1                   | Cluster0013_Mesenchyme-related/extracellular matrix |
| 1415951_at   | Fkbp10     | FK506 binding protein 10                              | Cluster0013_Mesenchyme-related/extracellular matrix |
| 1449632_s_at | Fkbp10     | FK506 binding protein 10                              | Cluster0013_Mesenchyme-related/extracellular matrix |
| 1423677_at   | Fkbp9      | FK506 binding protein 9                               | Cluster0013_Mesenchyme-related/extracellular matrix |
| 1437687_x_at | Fkbp9      | FK506 binding protein 9                               | Cluster0013_Mesenchyme-related/extracellular matrix |
| 1426642_at   | Fn1        | fibronectin 1                                         | Cluster0013_Mesenchyme-related/extracellular matrix |
| 1416221_at   | Fstl1      | folliculin-like 1                                     | Cluster0013_Mesenchyme-related/extracellular matrix |
| 1448259_at   | Fstl1      | folliculin-like 1                                     | Cluster0013_Mesenchyme-related/extracellular matrix |
| 1454924_at   | Fut10      | fucosyltransferase 10                                 | Cluster0013_Mesenchyme-related/extracellular matrix |
| 1423348_at   | Fzd8       | frizzled homolog 8 (Drosophila)                       | Cluster0013_Mesenchyme-related/extracellular matrix |
| 1423554_at   | Ggcx       | gamma-glutamyl carboxylase                            | Cluster0013_Mesenchyme-related/extracellular matrix |
| 1440215_at   | Gm11818    | predicted gene 11818                                  | Cluster0013_Mesenchyme-related/extracellular matrix |
| 1443939_at   | Gm12824    | predicted gene 12824                                  | Cluster0013_Mesenchyme-related/extracellular matrix |
| 1436745_at   | Gorab      | golgin, RAB6-interacting                              | Cluster0013_Mesenchyme-related/extracellular matrix |
| 1458365_at   | Gorab      | golgin, RAB6-interacting                              | Cluster0013_Mesenchyme-related/extracellular matrix |
| 1419688_at   | Gpc6       | glypican 6                                            | Cluster0013_Mesenchyme-related/extracellular matrix |
| 1428774_at   | Gpc6       | glypican 6                                            | Cluster0013_Mesenchyme-related/extracellular matrix |
| 1418379_s_at | Gpr124     | G protein-coupled receptor 124                        | Cluster0013_Mesenchyme-related/extracellular matrix |
| 1424099_at   | Gpx8       | glutathione peroxidase 8 (putative)                   | Cluster0013_Mesenchyme-related/extracellular matrix |
| 1430164_a_at | Grb10      | growth factor receptor bound protein 10               | Cluster0013_Mesenchyme-related/extracellular matrix |
| 1432092_a_at | Gulp1      | GULP, engulfment adaptor PTB domain containing 1      | Cluster0013_Mesenchyme-related/extracellular matrix |

|              |                         |                                                                                                              |                                                     |
|--------------|-------------------------|--------------------------------------------------------------------------------------------------------------|-----------------------------------------------------|
| 1453771_at   | Gulp1                   | GULP, engulfment adaptor PTB domain containing 1                                                             | Cluster0013_Mesenchyme-related/extracellular matrix |
| 1425636_at   | Hhat                    | hedgehog acyltransferase                                                                                     | Cluster0013_Mesenchyme-related/extracellular matrix |
| 1429219_at   | Ikbip                   | IKKBK interacting protein                                                                                    | Cluster0013_Mesenchyme-related/extracellular matrix |
| 1421239_at   | Il6st                   | interleukin 6 signal transducer                                                                              | Cluster0013_Mesenchyme-related/extracellular matrix |
| 1452843_at   | Il6st                   | interleukin 6 signal transducer                                                                              | Cluster0013_Mesenchyme-related/extracellular matrix |
| 1460295_s_at | Il6st                   | interleukin 6 signal transducer                                                                              | Cluster0013_Mesenchyme-related/extracellular matrix |
| 1423104_at   | Irs1                    | insulin receptor substrate 1                                                                                 | Cluster0013_Mesenchyme-related/extracellular matrix |
| 1423503_at   | Jam3                    | junction adhesion molecule 3                                                                                 | Cluster0013_Mesenchyme-related/extracellular matrix |
| 1460559_at   | Kank2                   | KN motif and ankyrin repeat domains 2                                                                        | Cluster0013_Mesenchyme-related/extracellular matrix |
| 1453071_s_at | Kdelc2                  | KDEL (Lys-Asp-Glu-Leu) containing 2                                                                          | Cluster0013_Mesenchyme-related/extracellular matrix |
| 1421462_a_at | Lepre1                  | leprecan 1                                                                                                   | Cluster0013_Mesenchyme-related/extracellular matrix |
| 1452752_at   | Lepre1                  | leprecan 1                                                                                                   | Cluster0013_Mesenchyme-related/extracellular matrix |
| 1436546_at   | Lix1l                   | Lix1-like                                                                                                    | Cluster0013_Mesenchyme-related/extracellular matrix |
| 1418171_at   | LOC100045031 /// Tceal8 | similar to transcription elongation factor A (SII)-like 8 /// transcription elongation factor A (SII)-like 8 | Cluster0013_Mesenchyme-related/extracellular matrix |
| 1421811_at   | LOC640441 /// Thbs1     | similar to thrombospondin 1 /// thrombospondin 1                                                             | Cluster0013_Mesenchyme-related/extracellular matrix |
| 1450377_at   | LOC640441 /// Thbs1     | similar to thrombospondin 1 /// thrombospondin 1                                                             | Cluster0013_Mesenchyme-related/extracellular matrix |
| 1416121_at   | Lox                     | lysyl oxidase                                                                                                | Cluster0013_Mesenchyme-related/extracellular matrix |
| 1448228_at   | Lox                     | lysyl oxidase                                                                                                | Cluster0013_Mesenchyme-related/extracellular matrix |
| 1451978_at   | Loxl1                   | lysyl oxidase-like 1                                                                                         | Cluster0013_Mesenchyme-related/extracellular matrix |
| 1418269_at   | Loxl3                   | lysyl oxidase-like 3                                                                                         | Cluster0013_Mesenchyme-related/extracellular matrix |
| 1429679_at   | Lrrc17                  | leucine rich repeat containing 17                                                                            | Cluster0013_Mesenchyme-related/extracellular matrix |
| 1431385_a_at | Mbtps1                  | membrane-bound transcription factor peptidase, site 1                                                        | Cluster0013_Mesenchyme-related/extracellular matrix |
| 1416136_at   | Mmp2                    | matrix metalloproteinase 2                                                                                   | Cluster0013_Mesenchyme-related/extracellular matrix |
| 1439364_a_at | Mmp2                    | matrix metalloproteinase 2                                                                                   | Cluster0013_Mesenchyme-related/extracellular matrix |
| 1421045_at   | Mrc2                    | mannose receptor, C type 2                                                                                   | Cluster0013_Mesenchyme-related/extracellular matrix |
| 1439151_at   | Msrb3                   | methionine sulfoxide reductase B3                                                                            | Cluster0013_Mesenchyme-related/extracellular matrix |
| 1454997_at   | Msrb3                   | methionine sulfoxide reductase B3                                                                            | Cluster0013_Mesenchyme-related/extracellular matrix |
| 1415923_at   | Ndn                     | necdin                                                                                                       | Cluster0013_Mesenchyme-related/extracellular matrix |
| 1423379_at   | Nfatc4                  | nuclear factor of activated T-cells, cytoplasmic, calcineurin-dependent 4                                    | Cluster0013_Mesenchyme-related/extracellular matrix |
| 1423380_s_at | Nfatc4                  | nuclear factor of activated T-cells, cytoplasmic, calcineurin-dependent 4                                    | Cluster0013_Mesenchyme-related/extracellular matrix |
| 1427191_at   | Npr2                    | natriuretic peptide receptor 2                                                                               | Cluster0013_Mesenchyme-related/extracellular matrix |
| 1427535_s_at | Obsl1                   | obscurin-like 1                                                                                              | Cluster0013_Mesenchyme-related/extracellular matrix |
| 1423915_at   | Olfml2b                 | olfactomedin-like 2B                                                                                         | Cluster0013_Mesenchyme-related/extracellular matrix |
| 1418674_at   | Osmr                    | oncostatin M receptor                                                                                        | Cluster0013_Mesenchyme-related/extracellular matrix |
| 1422889_at   | Pcdh18                  | protocadherin 18                                                                                             | Cluster0013_Mesenchyme-related/extracellular matrix |
| 1448933_at   | Pcdhb17                 | protocadherin beta 17                                                                                        | Cluster0013_Mesenchyme-related/extracellular matrix |
| 1437165_a_at | Pcolce                  | procollagen C-endopeptidase enhancer protein                                                                 | Cluster0013_Mesenchyme-related/extracellular matrix |
| 1448433_a_at | Pcolce                  | procollagen C-endopeptidase enhancer protein                                                                 | Cluster0013_Mesenchyme-related/extracellular matrix |
| 1417148_at   | Pdgfrb                  | platelet derived growth factor receptor, beta polypeptide                                                    | Cluster0013_Mesenchyme-related/extracellular matrix |
| 1436970_a_at | Pdgfrb                  | platelet derived growth factor receptor, beta polypeptide                                                    | Cluster0013_Mesenchyme-related/extracellular matrix |
| 1454862_at   | Phldb2                  | pleckstrin homology-like domain, family B, member 2                                                          | Cluster0013_Mesenchyme-related/extracellular matrix |
| 1417753_at   | Pkd2                    | polycystic kidney disease 2                                                                                  | Cluster0013_Mesenchyme-related/extracellular matrix |
| 1441870_s_at | Pkd2                    | polycystic kidney disease 2                                                                                  | Cluster0013_Mesenchyme-related/extracellular matrix |
| 1457145_at   | Plekhg4                 | pleckstrin homology domain containing, family G (with RhoGef domain) member 4                                | Cluster0013_Mesenchyme-related/extracellular matrix |
| 1423725_at   | Pls3                    | plastin 3 (T-isoform)                                                                                        | Cluster0013_Mesenchyme-related/extracellular matrix |
| 1416498_at   | Ppic                    | peptidylprolyl isomerase C                                                                                   | Cluster0013_Mesenchyme-related/extracellular matrix |
| 1416782_s_at | Praf2                   | PRA1 domain family 2                                                                                         | Cluster0013_Mesenchyme-related/extracellular matrix |
| 1423771_at   | Prkcdp                  | protein kinase C, delta binding protein                                                                      | Cluster0013_Mesenchyme-related/extracellular matrix |
| 1455724_at   | Prrg1                   | proline rich Gla (G-carboxyglutamic acid) 1                                                                  | Cluster0013_Mesenchyme-related/extracellular matrix |
| 1425526_a_at | Prrx1                   | paired related homeobox 1                                                                                    | Cluster0013_Mesenchyme-related/extracellular matrix |
| 1425527_at   | Prrx1                   | paired related homeobox 1                                                                                    | Cluster0013_Mesenchyme-related/extracellular matrix |
| 1425528_at   | Prrx1                   | paired related homeobox 1                                                                                    | Cluster0013_Mesenchyme-related/extracellular matrix |
| 1432129_a_at | Prrx1                   | paired related homeobox 1                                                                                    | Cluster0013_Mesenchyme-related/extracellular matrix |
| 1439774_at   | Prrx1                   | paired related homeobox 1                                                                                    | Cluster0013_Mesenchyme-related/extracellular matrix |
| 1432331_a_at | Prrx2                   | paired related homeobox 2                                                                                    | Cluster0013_Mesenchyme-related/extracellular matrix |
| 1424130_a_at | Ptrf                    | polymerase I and transcript release factor                                                                   | Cluster0013_Mesenchyme-related/extracellular matrix |
| 1418666_at   | Ptx3                    | pentraxin related gene                                                                                       | Cluster0013_Mesenchyme-related/extracellular matrix |

|              |               |                                                                            |                                                     |
|--------------|---------------|----------------------------------------------------------------------------|-----------------------------------------------------|
| 1436938_at   | Rbms3         | RNA binding motif, single stranded interacting protein                     | Cluster0013_Mesenchyme-related/extracellular matrix |
| 1424594_at   | Samd4         | sterile alpha motif domain containing 4                                    | Cluster0013_Mesenchyme-related/extracellular matrix |
| 1434740_at   | Scarf2        | scavenger receptor class F, member 2                                       | Cluster0013_Mesenchyme-related/extracellular matrix |
| 1438406_at   | Scarf2        | scavenger receptor class F, member 2                                       | Cluster0013_Mesenchyme-related/extracellular matrix |
| 1417012_at   | Sdc2          | syndecan 2                                                                 | Cluster0013_Mesenchyme-related/extracellular matrix |
| 1448545_at   | Sdc2          | syndecan 2                                                                 | Cluster0013_Mesenchyme-related/extracellular matrix |
| 1416168_at   | Serpinf1      | serine (or cysteine) peptidase inhibitor, clade F, member 1                | Cluster0013_Mesenchyme-related/extracellular matrix |
| 1453724_a_at | Serpinf1      | serine (or cysteine) peptidase inhibitor, clade F, member 1                | Cluster0013_Mesenchyme-related/extracellular matrix |
| 1450843_a_at | Serpinh1      | serine (or cysteine) peptidase inhibitor, clade H, member 1                | Cluster0013_Mesenchyme-related/extracellular matrix |
| 1456733_x_at | Serpinh1      | serine (or cysteine) peptidase inhibitor, clade H, member 1                | Cluster0013_Mesenchyme-related/extracellular matrix |
| 1454877_at   | Sertad4       | SERTA domain containing 4                                                  | Cluster0013_Mesenchyme-related/extracellular matrix |
| 1420688_a_at | Sgce          | sarcoglycan, epsilon                                                       | Cluster0013_Mesenchyme-related/extracellular matrix |
| 1428914_at   | Sh3pxd2a      | SH3 and PX domains 2A                                                      | Cluster0013_Mesenchyme-related/extracellular matrix |
| 1427180_at   | Slc27a3       | solute carrier family 27 (fatty acid transporter), member 3                | Cluster0013_Mesenchyme-related/extracellular matrix |
| 1448742_at   | Snai1         | snail homolog 1 (Drosophila)                                               | Cluster0013_Mesenchyme-related/extracellular matrix |
| 1418673_at   | Snai2         | snail homolog 2 (Drosophila)                                               | Cluster0013_Mesenchyme-related/extracellular matrix |
| 1416589_at   | Sparc         | secreted acidic cysteine rich glycoprotein                                 | Cluster0013_Mesenchyme-related/extracellular matrix |
| 1448392_at   | Sparc         | secreted acidic cysteine rich glycoprotein                                 | Cluster0013_Mesenchyme-related/extracellular matrix |
| 1439496_at   | Ston1         | Stonin 1                                                                   | Cluster0013_Mesenchyme-related/extracellular matrix |
| 1436319_at   | Sulf1         | sulfatase 1                                                                | Cluster0013_Mesenchyme-related/extracellular matrix |
| 1419182_at   | Svep1         | sushi, von Willebrand factor type A, EGF and pentraxin domain containing 1 | Cluster0013_Mesenchyme-related/extracellular matrix |
| 1418755_at   | Tbx15         | T-box 15                                                                   | Cluster0013_Mesenchyme-related/extracellular matrix |
| 1441496_at   | Tdrd3         | tudor domain containing 3                                                  | Cluster0013_Mesenchyme-related/extracellular matrix |
| 1438530_at   | Tfpi          | tissue factor pathway inhibitor                                            | Cluster0013_Mesenchyme-related/extracellular matrix |
| 1451790_a_at | Tfpi          | tissue factor pathway inhibitor                                            | Cluster0013_Mesenchyme-related/extracellular matrix |
| 1452432_at   | Tfpi          | tissue factor pathway inhibitor                                            | Cluster0013_Mesenchyme-related/extracellular matrix |
| 1418136_at   | Tgfb11        | transforming growth factor beta 1 induced transcript 1                     | Cluster0013_Mesenchyme-related/extracellular matrix |
| 1460302_at   | Thbs1         | thrombospondin 1                                                           | Cluster0013_Mesenchyme-related/extracellular matrix |
| 1420924_at   | Timp2         | tissue inhibitor of metalloproteinase 2                                    | Cluster0013_Mesenchyme-related/extracellular matrix |
| 1433662_s_at | Timp2         | tissue inhibitor of metalloproteinase 2                                    | Cluster0013_Mesenchyme-related/extracellular matrix |
| 1450040_at   | Timp2         | tissue inhibitor of metalloproteinase 2                                    | Cluster0013_Mesenchyme-related/extracellular matrix |
| 1454677_at   | Timp2         | tissue inhibitor of metalloproteinase 2                                    | Cluster0013_Mesenchyme-related/extracellular matrix |
| 1419088_at   | Timp3         | tissue inhibitor of metalloproteinase 3                                    | Cluster0013_Mesenchyme-related/extracellular matrix |
| 1419089_at   | Timp3         | tissue inhibitor of metalloproteinase 3                                    | Cluster0013_Mesenchyme-related/extracellular matrix |
| 1449334_at   | Timp3         | tissue inhibitor of metalloproteinase 3                                    | Cluster0013_Mesenchyme-related/extracellular matrix |
| 1449335_at   | Timp3         | tissue inhibitor of metalloproteinase 3                                    | Cluster0013_Mesenchyme-related/extracellular matrix |
| 1422587_at   | Tmem45a       | transmembrane protein 45a                                                  | Cluster0013_Mesenchyme-related/extracellular matrix |
| 1418733_at   | Twist1        | twist homolog 1 (Drosophila)                                               | Cluster0013_Mesenchyme-related/extracellular matrix |
| 1455862_at   | Ubtd2         | ubiquitin domain containing 2                                              | Cluster0013_Mesenchyme-related/extracellular matrix |
| 1427894_at   | Vasn          | vasorin                                                                    | Cluster0013_Mesenchyme-related/extracellular matrix |
| 1455812_x_at | Vasn          | vasorin                                                                    | Cluster0013_Mesenchyme-related/extracellular matrix |
| 1430596_s_at | Vgll3         | vestigial like 3 (Drosophila)                                              | Cluster0013_Mesenchyme-related/extracellular matrix |
| 1453593_at   | Vgll3         | vestigial like 3 (Drosophila)                                              | Cluster0013_Mesenchyme-related/extracellular matrix |
| 1455299_at   | Vgll3         | vestigial like 3 (Drosophila)                                              | Cluster0013_Mesenchyme-related/extracellular matrix |
| 1448593_at   | Wisp1         | WNT1 inducible signaling pathway protein 1                                 | Cluster0013_Mesenchyme-related/extracellular matrix |
| 1448594_at   | Wisp1         | WNT1 inducible signaling pathway protein 1                                 | Cluster0013_Mesenchyme-related/extracellular matrix |
| 1423824_at   | Wls           | wntless homolog (Drosophila)                                               | Cluster0013_Mesenchyme-related/extracellular matrix |
| 1423825_at   | Wls           | wntless homolog (Drosophila)                                               | Cluster0013_Mesenchyme-related/extracellular matrix |
| 1437434_a_at | Wls           | wntless homolog (Drosophila)                                               | Cluster0013_Mesenchyme-related/extracellular matrix |
| 1439945_at   | Zfp449        | zinc finger protein 449                                                    | Cluster0013_Mesenchyme-related/extracellular matrix |
| 1424722_at   | 1300017J02Rik | RIKEN cDNA 1300017J02 gene                                                 | Cluster0014_High in bone marrow                     |
| 1424695_at   | 2010011I20Rik | RIKEN cDNA 2010011I20 gene                                                 | Cluster0014_High in bone marrow                     |
| 1451450_at   | 2010011I20Rik | RIKEN cDNA 2010011I20 gene                                                 | Cluster0014_High in bone marrow                     |
| 1418389_at   | 2810453I06Rik | RIKEN cDNA 2810453I06 gene                                                 | Cluster0014_High in bone marrow                     |
| 1451975_at   | 2810453I06Rik | RIKEN cDNA 2810453I06 gene                                                 | Cluster0014_High in bone marrow                     |
| 1439540_at   |               | Mar-02 membrane-associated ring finger (C3HC4) 2                           | Cluster0014_High in bone marrow                     |
| 1430918_at   |               | Mar-03 membrane-associated ring finger (C3HC4) 3                           | Cluster0014_High in bone marrow                     |



|              |                                  |                                                                                                                                                                                                                                          |                                 |
|--------------|----------------------------------|------------------------------------------------------------------------------------------------------------------------------------------------------------------------------------------------------------------------------------------|---------------------------------|
| 1441643_at   |                                  | Mar-03 membrane-associated ring finger (C3HC4) 3                                                                                                                                                                                         | Cluster0014_High in bone marrow |
| 1454193_at   | 5430401H09Rik                    | RIKEN cDNA 5430401H09 gene                                                                                                                                                                                                               | Cluster0014_High in bone marrow |
| 1431194_at   | 6030468B19Rik                    | RIKEN cDNA 6030468B19 gene                                                                                                                                                                                                               | Cluster0014_High in bone marrow |
| 1427425_at   | 9130208E07Rik                    | RIKEN cDNA 9130208E07 gene                                                                                                                                                                                                               | Cluster0014_High in bone marrow |
| 1442406_at   | 9230104K21Rik                    | RIKEN cDNA 9230104K21 gene                                                                                                                                                                                                               | Cluster0014_High in bone marrow |
| 1430839_at   | 9430076G02Rik                    | RIKEN cDNA 9430076G02 gene                                                                                                                                                                                                               | Cluster0014_High in bone marrow |
| 1416402_at   | Abcb10                           | ATP-binding cassette, sub-family B (MDR/TAP), member 10                                                                                                                                                                                  | Cluster0014_High in bone marrow |
| 1416403_at   | Abcb10                           | ATP-binding cassette, sub-family B (MDR/TAP), member 10                                                                                                                                                                                  | Cluster0014_High in bone marrow |
| 1454265_a_at | Abcb10 /// LOC100048313          | ATP-binding cassette, sub-family B (MDR/TAP), member 10 /// similar to ABC transporter                                                                                                                                                   | Cluster0014_High in bone marrow |
| 1422635_at   | Ache                             | acetylcholinesterase                                                                                                                                                                                                                     | Cluster0014_High in bone marrow |
| 1421975_a_at | Add2                             | adducin 2 (beta)                                                                                                                                                                                                                         | Cluster0014_High in bone marrow |
| 1431076_at   | Add2                             | adducin 2 (beta)                                                                                                                                                                                                                         | Cluster0014_High in bone marrow |
| 1435287_at   | Add2                             | adducin 2 (beta)                                                                                                                                                                                                                         | Cluster0014_High in bone marrow |
| 1451914_a_at | Add2                             | adducin 2 (beta)                                                                                                                                                                                                                         | Cluster0014_High in bone marrow |
| 1449077_at   | Ahsp                             | alpha hemoglobin stabilizing protein                                                                                                                                                                                                     | Cluster0014_High in bone marrow |
| 1459692_at   | Al661323                         | expressed sequence Al661323                                                                                                                                                                                                              | Cluster0014_High in bone marrow |
| 1451675_a_at | Alas2                            | aminolevulinic acid synthase 2, erythroid                                                                                                                                                                                                | Cluster0014_High in bone marrow |
| 1422699_at   | Alox12                           | arachidonate 12-lipoxygenase                                                                                                                                                                                                             | Cluster0014_High in bone marrow |
| 1420338_at   | Alox15                           | arachidonate 15-lipoxygenase                                                                                                                                                                                                             | Cluster0014_High in bone marrow |
| 1419421_at   | Ank1                             | ankyrin 1, erythroid                                                                                                                                                                                                                     | Cluster0014_High in bone marrow |
| 1425677_a_at | Ank1                             | ankyrin 1, erythroid                                                                                                                                                                                                                     | Cluster0014_High in bone marrow |
| 1452512_a_at | Ank1                             | ankyrin 1, erythroid                                                                                                                                                                                                                     | Cluster0014_High in bone marrow |
| 1440927_x_at | Apol11b                          | apolipoprotein L 11b                                                                                                                                                                                                                     | Cluster0014_High in bone marrow |
| 1457307_at   | Apol11b                          | apolipoprotein L 11b                                                                                                                                                                                                                     | Cluster0014_High in bone marrow |
| 1441054_at   | Apol8                            | apolipoprotein L 8                                                                                                                                                                                                                       | Cluster0014_High in bone marrow |
| 1430632_at   | Asb1                             | ankyrin repeat and SOCS box-containing 1                                                                                                                                                                                                 | Cluster0014_High in bone marrow |
| 1415864_at   | Bpgm                             | 2,3-bisphosphoglycerate mutase                                                                                                                                                                                                           | Cluster0014_High in bone marrow |
| 1415865_s_at | Bpgm                             | 2,3-bisphosphoglycerate mutase                                                                                                                                                                                                           | Cluster0014_High in bone marrow |
| 1448119_at   | Bpgm                             | 2,3-bisphosphoglycerate mutase                                                                                                                                                                                                           | Cluster0014_High in bone marrow |
| 1452372_at   | Bsdcl1                           | BSD domain containing 1                                                                                                                                                                                                                  | Cluster0014_High in bone marrow |
| 1443142_at   | Btrc                             | beta-transducin repeat containing protein                                                                                                                                                                                                | Cluster0014_High in bone marrow |
| 1421264_at   | Butr1                            | butyrophilin related 1                                                                                                                                                                                                                   | Cluster0014_High in bone marrow |
| 1430879_at   | C030008P14Rik                    | RIKEN cDNA C030008P14 gene                                                                                                                                                                                                               | Cluster0014_High in bone marrow |
| 1419691_at   | Camp                             | cathelicidin antimicrobial peptide                                                                                                                                                                                                       | Cluster0014_High in bone marrow |
| 1415907_at   | Ccnd3                            | cyclin D3                                                                                                                                                                                                                                | Cluster0014_High in bone marrow |
| 1422957_at   | Ccr3                             | chemokine (C-C motif) receptor 3                                                                                                                                                                                                         | Cluster0014_High in bone marrow |
| 1437209_at   | Cep76                            | centrosomal protein 76                                                                                                                                                                                                                   | Cluster0014_High in bone marrow |
| 1437254_at   | Cep76                            | centrosomal protein 76                                                                                                                                                                                                                   | Cluster0014_High in bone marrow |
| 1419764_at   | Chi3l3                           | chitinase 3-like 3                                                                                                                                                                                                                       | Cluster0014_High in bone marrow |
| 1425451_s_at | Chi3l3 /// Chi3l4                | chitinase 3-like 3 /// chitinase 3-like 4                                                                                                                                                                                                | Cluster0014_High in bone marrow |
| 1422920_at   | Cldn13                           | claudin 13                                                                                                                                                                                                                               | Cluster0014_High in bone marrow |
| 1422492_at   | Cpox                             | coproporphyrinogen oxidase                                                                                                                                                                                                               | Cluster0014_High in bone marrow |
| 1422493_at   | Cpox                             | coproporphyrinogen oxidase                                                                                                                                                                                                               | Cluster0014_High in bone marrow |
| 1440747_at   | Cpox                             | coproporphyrinogen oxidase                                                                                                                                                                                                               | Cluster0014_High in bone marrow |
| 1418989_at   | Ctse                             | cathepsin E                                                                                                                                                                                                                              | Cluster0014_High in bone marrow |
| 1444539_at   | D530039A21Rik                    | RIKEN cDNA D530039A21 gene                                                                                                                                                                                                               | Cluster0014_High in bone marrow |
| 1429392_at   | Dcaf12                           | DDB1 and CUL4 associated factor 12                                                                                                                                                                                                       | Cluster0014_High in bone marrow |
| 1429393_at   | Dcaf12                           | DDB1 and CUL4 associated factor 12                                                                                                                                                                                                       | Cluster0014_High in bone marrow |
| 1438669_at   | Dcaf12                           | DDB1 and CUL4 associated factor 12                                                                                                                                                                                                       | Cluster0014_High in bone marrow |
| 1436434_at   | E2f2                             | E2F transcription factor 2                                                                                                                                                                                                               | Cluster0014_High in bone marrow |
| 1455790_at   | E2f2                             | E2F transcription factor 2                                                                                                                                                                                                               | Cluster0014_High in bone marrow |
| 1421802_at   | Ear1                             | eosinophil-associated, ribonuclease A family, member 1                                                                                                                                                                                   | Cluster0014_High in bone marrow |
| 1422411_s_at | Ear1 /// Ear12 /// Ear2 /// Ear3 | eosinophil-associated, ribonuclease A family, member 1 /// eosinophil-associated, ribonuclease A family, member 12 /// eosinophil-associated, ribonuclease A family, member 2 /// eosinophil-associated, ribonuclease A family, member 3 | Cluster0014_High in bone marrow |
| 1449846_at   | Ear2                             | eosinophil-associated, ribonuclease A family, member 2                                                                                                                                                                                   | Cluster0014_High in bone marrow |
| 1421900_at   | Eif2ak1                          | eukaryotic translation initiation factor 2 alpha kinase 1                                                                                                                                                                                | Cluster0014_High in bone marrow |
| 1421901_at   | Eif2ak1                          | eukaryotic translation initiation factor 2 alpha kinase 1                                                                                                                                                                                | Cluster0014_High in bone marrow |
| 1422928_at   | Elane                            | elastase, neutrophil expressed                                                                                                                                                                                                           | Cluster0014_High in bone marrow |

|              |                         |                                                                         |                                 |
|--------------|-------------------------|-------------------------------------------------------------------------|---------------------------------|
| 1424092_at   | Epb4.1                  | erythrocyte protein band 4.1                                            | Cluster0014_High in bone marrow |
| 1430369_at   | Epb4.1                  | erythrocyte protein band 4.1                                            | Cluster0014_High in bone marrow |
| 1417337_at   | Epb4.2                  | erythrocyte protein band 4.2                                            | Cluster0014_High in bone marrow |
| 1417338_at   | Epb4.2                  | erythrocyte protein band 4.2                                            | Cluster0014_High in bone marrow |
| 1460223_a_at | Epb4.9                  | erythrocyte protein band 4.9                                            | Cluster0014_High in bone marrow |
| 1423344_at   | Epor                    | erythropoietin receptor                                                 | Cluster0014_High in bone marrow |
| 1449136_at   | Epx                     | eosinophil peroxidase                                                   | Cluster0014_High in bone marrow |
| 1418909_at   | Ermap                   | erythroblast membrane-associated protein                                | Cluster0014_High in bone marrow |
| 1433639_at   | Fam117a                 | family with sequence similarity 117, member A                           | Cluster0014_High in bone marrow |
| 1429682_at   | Fam46c                  | family with sequence similarity 46, member C                            | Cluster0014_High in bone marrow |
| 1448021_at   | Fam46c                  | family with sequence similarity 46, member C                            | Cluster0014_High in bone marrow |
| 1444471_at   | Fam55b                  | family with sequence similarity 55, member B                            | Cluster0014_High in bone marrow |
| 1430080_at   | Fcnb                    | ficolin B                                                               | Cluster0014_High in bone marrow |
| 1418698_a_at | Fech                    | ferrochelatase                                                          | Cluster0014_High in bone marrow |
| 1418699_s_at | Fech                    | ferrochelatase                                                          | Cluster0014_High in bone marrow |
| 1449181_at   | Fech                    | ferrochelatase                                                          | Cluster0014_High in bone marrow |
| 1439018_at   | Fhdc1                   | FH2 domain containing 1                                                 | Cluster0014_High in bone marrow |
| 1443657_at   | Fhdc1                   | FH2 domain containing 1                                                 | Cluster0014_High in bone marrow |
| 1418311_at   | Fn3k                    | fructosamine 3 kinase                                                   | Cluster0014_High in bone marrow |
| 1428553_at   | Glrx5                   | glutaredoxin 5 homolog (S. cerevisiae)                                  | Cluster0014_High in bone marrow |
| 1419720_at   | Gp9                     | glycoprotein 9 (platelet)                                               | Cluster0014_High in bone marrow |
| 1423016_a_at | Gypa                    | glycophorin A                                                           | Cluster0014_High in bone marrow |
| 1425643_at   | Gypa                    | glycophorin A                                                           | Cluster0014_High in bone marrow |
| 1417714_x_at | Hba-a1 /// Hba-a2       | hemoglobin alpha, adult chain 1 /// hemoglobin alpha, adult chain 2     | Cluster0014_High in bone marrow |
| 1427866_x_at | Hbb-b2                  | hemoglobin, beta adult minor chain                                      | Cluster0014_High in bone marrow |
| 1418199_at   | Hemgn                   | hemogen                                                                 | Cluster0014_High in bone marrow |
| 1426475_at   | Hmbs                    | hydroxymethylbilane synthase                                            | Cluster0014_High in bone marrow |
| 1422930_at   | Icam4                   | intercellular adhesion molecule 4, Landsteiner-Wiener blood group       | Cluster0014_High in bone marrow |
| 1440865_at   | Iftim6                  | interferon induced transmembrane protein 6                              | Cluster0014_High in bone marrow |
| 1417255_at   | Ift140                  | intraflagellar transport 140 homolog (Chlamydomonas)                    | Cluster0014_High in bone marrow |
| 1423651_at   | Isca1                   | iron-sulfur cluster assembly 1 homolog (S. cerevisiae)                  | Cluster0014_High in bone marrow |
| 1423652_at   | Isca1                   | iron-sulfur cluster assembly 1 homolog (S. cerevisiae)                  | Cluster0014_High in bone marrow |
| 1441590_at   | Kcnj5                   | potassium inwardly-rectifying channel, subfamily J, member 5            | Cluster0014_High in bone marrow |
| 1449057_at   | Kel                     | Kell blood group                                                        | Cluster0014_High in bone marrow |
| 1450827_at   | Kif23                   | kinesin family member 23                                                | Cluster0014_High in bone marrow |
| 1418600_at   | Klf1                    | Kruppel-like factor 1 (erythroid)                                       | Cluster0014_High in bone marrow |
| 1424888_at   | LOC100044703 /// March2 | similar to March2 protein /// membrane-associated ring finger (C3HC4) 2 | Cluster0014_High in bone marrow |
| 1459871_x_at | LOC100044703 /// March2 | similar to March2 protein /// membrane-associated ring finger (C3HC4) 2 | Cluster0014_High in bone marrow |
| 1421277_at   | LOC630963 /// Spna1     | similar to spectrin alpha 1 /// spectrin alpha 1                        | Cluster0014_High in bone marrow |
| 1421278_s_at | LOC630963 /// Spna1     | similar to spectrin alpha 1 /// spectrin alpha 1                        | Cluster0014_High in bone marrow |
| 1450009_at   | Ltf                     | lactotransferrin                                                        | Cluster0014_High in bone marrow |
| 1449965_at   | Mcpt8                   | mast cell protease 8                                                    | Cluster0014_High in bone marrow |
| 1442000_at   | Mfsd2b                  | major facilitator superfamily domain containing 2B                      | Cluster0014_High in bone marrow |
| 1439101_at   | Mylk3                   | myosin light chain kinase 3                                             | Cluster0014_High in bone marrow |
| 1436169_at   | NA                      | ---                                                                     | Cluster0014_High in bone marrow |
| 1443249_at   | NA                      | ---                                                                     | Cluster0014_High in bone marrow |
| 1443689_at   | NA                      | ---                                                                     | Cluster0014_High in bone marrow |
| 1443872_at   | NA                      | ---                                                                     | Cluster0014_High in bone marrow |
| 1446391_at   | NA                      | ---                                                                     | Cluster0014_High in bone marrow |
| 1446422_at   | NA                      | ---                                                                     | Cluster0014_High in bone marrow |
| 1446898_at   | NA                      | ---                                                                     | Cluster0014_High in bone marrow |
| 1455601_at   | NA                      | ---                                                                     | Cluster0014_High in bone marrow |
| 1458574_at   | NA                      | ---                                                                     | Cluster0014_High in bone marrow |
| 1458609_at   | NA                      | ---                                                                     | Cluster0014_High in bone marrow |
| 1459202_at   | NA                      | ---                                                                     | Cluster0014_High in bone marrow |
| 1459373_at   | NA                      | ---                                                                     | Cluster0014_High in bone marrow |
| 1452001_at   | Nfe2                    | nuclear factor, erythroid derived 2                                     | Cluster0014_High in bone marrow |

|              |                   |                                                          |                                 |
|--------------|-------------------|----------------------------------------------------------|---------------------------------|
| 1418722_at   | Ngp               | neutrophilic granule protein                             | Cluster0014_High in bone marrow |
| 1415946_at   | Pigq              | phosphatidylinositol glycan anchor biosynthesis, class Q | Cluster0014_High in bone marrow |
| 1426055_a_at | Pigq              | phosphatidylinositol glycan anchor biosynthesis, class Q | Cluster0014_High in bone marrow |
| 1449469_at   | Pkd2l2            | polycystic kidney disease 2-like 2                       | Cluster0014_High in bone marrow |
| 1418480_at   | Ppbp              | pro-platelet basic protein                               | Cluster0014_High in bone marrow |
| 1416618_at   | Ppox              | protoporphyrinogen oxidase                               | Cluster0014_High in bone marrow |
| 1422873_at   | Prg2              | proteoglycan 2, bone marrow                              | Cluster0014_High in bone marrow |
| 1449924_at   | Prg3              | proteoglycan 3                                           | Cluster0014_High in bone marrow |
| 1424585_at   | Ranbp10           | RAN binding protein 10                                   | Cluster0014_High in bone marrow |
| 1421265_a_at | Rbm38             | RNA binding motif protein 38                             | Cluster0014_High in bone marrow |
| 1419014_at   | Rhag              | Rhesus blood group-associated A glycoprotein             | Cluster0014_High in bone marrow |
| 1417049_at   | Rhd               | Rh blood group, D antigen                                | Cluster0014_High in bone marrow |
| 1434611_at   | Rnf123            | ring finger protein 123                                  | Cluster0014_High in bone marrow |
| 1419394_s_at | S100a8            | S100 calcium binding protein A8 (calgranulin A)          | Cluster0014_High in bone marrow |
| 1448756_at   | S100a9            | S100 calcium binding protein A9 (calgranulin B)          | Cluster0014_High in bone marrow |
| 1425288_at   | Samd11            | sterile alpha motif domain containing 11                 | Cluster0014_High in bone marrow |
| 1417750_a_at | Slc25a37          | solute carrier family 25, member 37                      | Cluster0014_High in bone marrow |
| 1430374_at   | Slc25a37          | solute carrier family 25, member 37                      | Cluster0014_High in bone marrow |
| 1424418_at   | Slc25a38          | solute carrier family 25, member 38                      | Cluster0014_High in bone marrow |
| 1453255_at   | Slc43a1           | solute carrier family 43, member 1                       | Cluster0014_High in bone marrow |
| 1416464_at   | Slc4a1            | solute carrier family 4 (anion exchanger), member 1      | Cluster0014_High in bone marrow |
| 1431743_a_at | Slc4a1            | solute carrier family 4 (anion exchanger), member 1      | Cluster0014_High in bone marrow |
| 1434502_x_at | Slc4a1            | solute carrier family 4 (anion exchanger), member 1      | Cluster0014_High in bone marrow |
| 1418493_a_at | Snca              | synuclein, alpha                                         | Cluster0014_High in bone marrow |
| 1431022_at   | Snca              | synuclein, alpha                                         | Cluster0014_High in bone marrow |
| 1436853_a_at | Snca              | synuclein, alpha                                         | Cluster0014_High in bone marrow |
| 1426018_a_at | Sox6              | SRY-box containing gene 6                                | Cluster0014_High in bone marrow |
| 1450556_at   | Spnb1             | spectrin beta 1                                          | Cluster0014_High in bone marrow |
| 1433544_at   | Stradb            | STE20-related kinase adaptor beta                        | Cluster0014_High in bone marrow |
| 1419411_at   | Tac2              | tachykinin 2                                             | Cluster0014_High in bone marrow |
| 1435344_at   | Tfdp2             | transcription factor Dp 2                                | Cluster0014_High in bone marrow |
| 1437174_at   | Tfdp2             | transcription factor Dp 2                                | Cluster0014_High in bone marrow |
| 1443962_at   | Tfdp2             | transcription factor Dp 2                                | Cluster0014_High in bone marrow |
| 1428108_x_at | Tmcc2             | transmembrane and coiled-coil domains 2                  | Cluster0014_High in bone marrow |
| 1452666_a_at | Tmcc2             | transmembrane and coiled-coil domains 2                  | Cluster0014_High in bone marrow |
| 1422754_at   | Tmod1             | tropomodulin 1                                           | Cluster0014_High in bone marrow |
| 1429607_at   | Trak2             | trafficking protein, kinesin binding 2                   | Cluster0014_High in bone marrow |
| 1435016_at   | Trak2             | trafficking protein, kinesin binding 2                   | Cluster0014_High in bone marrow |
| 1452630_at   | Trem1             | triggering receptor expressed on myeloid cells-like 1    | Cluster0014_High in bone marrow |
| 1419311_at   | Trim10            | tripartite motif-containing 10                           | Cluster0014_High in bone marrow |
| 1425157_x_at | Tspan33           | tetraspanin 33                                           | Cluster0014_High in bone marrow |
| 1451608_a_at | Tspan33           | tetraspanin 33                                           | Cluster0014_High in bone marrow |
| 1451609_at   | Tspan33           | tetraspanin 33                                           | Cluster0014_High in bone marrow |
| 1455618_x_at | Tspan33           | tetraspanin 33                                           | Cluster0014_High in bone marrow |
| 1453047_at   | Tspo2             | translocator protein 2                                   | Cluster0014_High in bone marrow |
| 1444214_at   | Tubb1             | tubulin, beta 1                                          | Cluster0014_High in bone marrow |
| 1429972_s_at | Txnrd2            | thioredoxin reductase 2                                  | Cluster0014_High in bone marrow |
| 1416963_at   | Ubac1             | ubiquitin associated domain containing 1                 | Cluster0014_High in bone marrow |
| 1433765_at   | Ube2o             | ubiquitin-conjugating enzyme E2O                         | Cluster0014_High in bone marrow |
| 1417206_at   | Urod              | uroporphyrinogen decarboxylase                           | Cluster0014_High in bone marrow |
| 1443849_x_at | Urod              | uroporphyrinogen decarboxylase                           | Cluster0014_High in bone marrow |
| 1423482_at   | Uros              | uroporphyrinogen III synthase                            | Cluster0014_High in bone marrow |
| 1422416_s_at | Vpreb1 /// Vpreb2 | pre-B lymphocyte gene 1 /// pre-B lymphocyte gene 2      | Cluster0014_High in bone marrow |
| 1423963_at   | Wdr26             | WD repeat domain 26                                      | Cluster0014_High in bone marrow |
| 1415682_at   | Xpo7              | exportin 7                                               | Cluster0014_High in bone marrow |
| 1435814_at   | Xpo7              | exportin 7                                               | Cluster0014_High in bone marrow |
| 1442836_at   | Xpo7              | exportin 7                                               | Cluster0014_High in bone marrow |

|              |                     |                                                                                                             |                                     |
|--------------|---------------------|-------------------------------------------------------------------------------------------------------------|-------------------------------------|
| 1446826_at   | Xpo7                | exportin 7                                                                                                  | Cluster0014_High in bone marrow     |
| 1434501_at   | Ypel4               | yippee-like 4 (Drosophila)                                                                                  | Cluster0014_High in bone marrow     |
| 1430861_at   | 2010111101Rik       | RIKEN cDNA 2010111101 gene                                                                                  | Cluster0015_Large intestine-related |
| 1440229_at   | 2310034G01Rik       | RIKEN cDNA 2310034G01 gene                                                                                  | Cluster0015_Large intestine-related |
| 1435639_at   | 2610528A11Rik       | RIKEN cDNA 2610528A11 gene                                                                                  | Cluster0015_Large intestine-related |
| 1432590_at   | 4930573O21Rik       | RIKEN cDNA 4930573O21 gene                                                                                  | Cluster0015_Large intestine-related |
| 1432336_at   | 5033404E19Rik       | RIKEN cDNA 5033404E19 gene                                                                                  | Cluster0015_Large intestine-related |
| 1432902_at   | 9130414P19Rik       | RIKEN cDNA 9130414P19 gene                                                                                  | Cluster0015_Large intestine-related |
| 1430768_at   | 9530018H14Rik       | RIKEN cDNA 9530018H14 gene                                                                                  | Cluster0015_Large intestine-related |
| 1433855_at   | Abat                | 4-aminobutyrate aminotransferase                                                                            | Cluster0015_Large intestine-related |
| 1421559_at   | Abo                 | ABO blood group (transferase A, alpha 1-3-N-acetylgalactosaminyltransferase, transferase B, alpha 1-3-gal:  | Cluster0015_Large intestine-related |
| 1450825_at   | Acer1               | alkaline ceramidase 1                                                                                       | Cluster0015_Large intestine-related |
| 1425559_a_at | Acsm3               | acyl-CoA synthetase medium-chain family member 3                                                            | Cluster0015_Large intestine-related |
| 1422479_at   | Acss2               | acyl-CoA synthetase short-chain family member 2                                                             | Cluster0015_Large intestine-related |
| 1427056_at   | Adams15             | a disintegrin-like and metallopeptidase (reprolysin type) with thrombospondin type 1 motif, 15              | Cluster0015_Large intestine-related |
| 1435048_at   | AI854703            | expressed sequence AI854703                                                                                 | Cluster0015_Large intestine-related |
| 1435049_s_at | AI854703            | expressed sequence AI854703                                                                                 | Cluster0015_Large intestine-related |
| 1442583_a_at | AI854703            | expressed sequence AI854703                                                                                 | Cluster0015_Large intestine-related |
| 1453023_at   | Ankhd1 /// Eif4ebp3 | ankyrin repeat and KH domain containing 1 /// eukaryotic translation initiation factor 4E binding protein : | Cluster0015_Large intestine-related |
| 1426571_at   | Ano1                | anoctamin 1, calcium activated chloride channel                                                             | Cluster0015_Large intestine-related |
| 1459713_s_at | Ano1                | anoctamin 1, calcium activated chloride channel                                                             | Cluster0015_Large intestine-related |
| 1417828_at   | Aqp8                | aquaporin 8                                                                                                 | Cluster0015_Large intestine-related |
| 1449475_at   | Atp12a              | ATPase, H+/K+ transporting, nongastric, alpha polypeptide                                                   | Cluster0015_Large intestine-related |
| 1452326_at   | Atp2c2              | ATPase, Ca++ transporting, type 2C, member 2                                                                | Cluster0015_Large intestine-related |
| 1436321_at   | B3gnt7              | UDP-GlcNAc:betaGal beta-1,3-N-acetylglucosaminyltransferase 7                                               | Cluster0015_Large intestine-related |
| 1425729_at   | Best2               | bestrophin 2                                                                                                | Cluster0015_Large intestine-related |
| 1450131_a_at | Bspry               | B-box and SPRY domain containing                                                                            | Cluster0015_Large intestine-related |
| 1437960_at   | Capn13              | calpain 13                                                                                                  | Cluster0015_Large intestine-related |
| 1418671_at   | Capn5               | calpain 5                                                                                                   | Cluster0015_Large intestine-related |
| 1416193_at   | Car1                | carbonic anhydrase 1                                                                                        | Cluster0015_Large intestine-related |
| 1418094_s_at | Car4                | carbonic anhydrase 4                                                                                        | Cluster0015_Large intestine-related |
| 1448949_at   | Car4                | carbonic anhydrase 4                                                                                        | Cluster0015_Large intestine-related |
| 1418748_at   | Casp14              | caspase 14                                                                                                  | Cluster0015_Large intestine-related |
| 1449582_at   | Cdx1                | caudal type homeobox 1                                                                                      | Cluster0015_Large intestine-related |
| 1418113_at   | Cyp2d10             | cytochrome P450, family 2, subfamily d, polypeptide 10                                                      | Cluster0015_Large intestine-related |
| 1435853_at   | Cyp2d12             | cytochrome P450, family 2, subfamily d, polypeptide 12                                                      | Cluster0015_Large intestine-related |
| 1425365_a_at | Cyp2d13             | cytochrome P450, family 2, subfamily d, polypeptide 13                                                      | Cluster0015_Large intestine-related |
| 1431803_at   | Cyp2d13             | cytochrome P450, family 2, subfamily d, polypeptide 13                                                      | Cluster0015_Large intestine-related |
| 1425069_at   | Cyp2d34             | cytochrome P450, family 2, subfamily d, polypeptide 34                                                      | Cluster0015_Large intestine-related |
| 1425746_at   | D730039F16Rik       | RIKEN cDNA D730039F16 gene                                                                                  | Cluster0015_Large intestine-related |
| 1430688_s_at | D730039F16Rik       | RIKEN cDNA D730039F16 gene                                                                                  | Cluster0015_Large intestine-related |
| 1442290_at   | Defb45              | defensin beta 45                                                                                            | Cluster0015_Large intestine-related |
| 1443579_s_at | Depdc6              | DEP domain containing 6                                                                                     | Cluster0015_Large intestine-related |
| 1419475_a_at | Ehf                 | ets homologous factor                                                                                       | Cluster0015_Large intestine-related |
| 1426540_at   | Endod1              | endonuclease domain containing 1                                                                            | Cluster0015_Large intestine-related |
| 1426541_a_at | Endod1              | endonuclease domain containing 1                                                                            | Cluster0015_Large intestine-related |
| 1426542_at   | Endod1              | endonuclease domain containing 1                                                                            | Cluster0015_Large intestine-related |
| 1426543_x_at | Endod1              | endonuclease domain containing 1                                                                            | Cluster0015_Large intestine-related |
| 1433796_at   | Endod1              | endonuclease domain containing 1                                                                            | Cluster0015_Large intestine-related |
| 1417203_at   | Ethe1               | ethylmalonic encephalopathy 1                                                                               | Cluster0015_Large intestine-related |
| 1426960_a_at | Fa2h                | fatty acid 2-hydroxylase                                                                                    | Cluster0015_Large intestine-related |
| 1430717_at   | Fam83e              | family with sequence similarity 83, member E                                                                | Cluster0015_Large intestine-related |
| 1437135_at   | Fbxw10              | F-box and WD-40 domain protein 10                                                                           | Cluster0015_Large intestine-related |
| 1417872_at   | Fhl1                | four and a half LIM domains 1                                                                               | Cluster0015_Large intestine-related |
| 1431900_a_at | Foxa3               | forkhead box A3                                                                                             | Cluster0015_Large intestine-related |
| 1434862_at   | Fut2                | fucosyltransferase 2                                                                                        | Cluster0015_Large intestine-related |
| 1457409_at   | Fut9                | fucosyltransferase 9                                                                                        | Cluster0015_Large intestine-related |

|              |                                         |                                                                                                                      |                                     |
|--------------|-----------------------------------------|----------------------------------------------------------------------------------------------------------------------|-------------------------------------|
| 1418207_at   | Fxyd4                                   | FXYD domain-containing ion transport regulator 4                                                                     | Cluster0015_Large intestine-related |
| 1449526_a_at | Gdppd3                                  | glycerophosphodiester phosphodiesterase domain containing 3                                                          | Cluster0015_Large intestine-related |
| 1419595_a_at | Ggh                                     | gamma-glutamyl hydrolase                                                                                             | Cluster0015_Large intestine-related |
| 1449204_at   | Gjb5                                    | gap junction protein, beta 5                                                                                         | Cluster0015_Large intestine-related |
| 1421184_a_at | Gm10035 /// Higd1c /// Mettl7a1 /// Met | predicted gene 10035 /// HIG1 domain family, member 1C /// methyltransferase like 7A1 /// methyltransferase like 7A2 | Cluster0015_Large intestine-related |
| 1415698_at   | Golm1                                   | golgi membrane protein 1                                                                                             | Cluster0015_Large intestine-related |
| 1425173_s_at | Golph3l                                 | golgi phosphoprotein 3-like                                                                                          | Cluster0015_Large intestine-related |
| 1451619_at   | Golph3l                                 | golgi phosphoprotein 3-like                                                                                          | Cluster0015_Large intestine-related |
| 1430641_at   | Gsdmc2 /// Gsdmc4                       | gasdermin C2 /// gasdermin C4                                                                                        | Cluster0015_Large intestine-related |
| 1454883_at   | Gsdmc2 /// LOC100045250                 | gasdermin C2 /// hypothetical protein LOC100045250                                                                   | Cluster0015_Large intestine-related |
| 1418654_at   | Hao2                                    | hydroxyacid oxidase 2                                                                                                | Cluster0015_Large intestine-related |
| 1434150_a_at | Higd1c /// Mettl7a1 /// Mettl7a2        | HIG1 domain family, member 1C /// methyltransferase like 7A1 /// methyltransferase like 7A2                          | Cluster0015_Large intestine-related |
| 1456510_x_at | Higd1c /// Mettl7a2                     | HIG1 domain family, member 1C /// methyltransferase like 7A2                                                         | Cluster0015_Large intestine-related |
| 1447356_at   | Higd1c /// Mettl7a2-Higd1c              | HIG1 domain family, member 1C /// Mettl7a2-Higd1c readthrough transcript                                             | Cluster0015_Large intestine-related |
| 1431475_a_at | Hoxa10                                  | homeobox A10                                                                                                         | Cluster0015_Large intestine-related |
| 1452400_a_at | Hoxa11as                                | HOXA11 antisense RNA (non-protein coding)                                                                            | Cluster0015_Large intestine-related |
| 1422336_at   | Hoxa13                                  | homeobox A13                                                                                                         | Cluster0015_Large intestine-related |
| 1419576_at   | Hoxb13                                  | homeobox B13                                                                                                         | Cluster0015_Large intestine-related |
| 1450584_at   | Hoxd11                                  | homeobox D11                                                                                                         | Cluster0015_Large intestine-related |
| 1422239_at   | Hoxd13                                  | homeobox D13                                                                                                         | Cluster0015_Large intestine-related |
| 1440626_at   | Hoxd13                                  | homeobox D13                                                                                                         | Cluster0015_Large intestine-related |
| 1416761_at   | Hsd11b2                                 | hydroxysteroid 11-beta dehydrogenase 2                                                                               | Cluster0015_Large intestine-related |
| 1425589_at   | Hsd17b13                                | hydroxysteroid (17-beta) dehydrogenase 13                                                                            | Cluster0015_Large intestine-related |
| 1443365_at   | Htr4                                    | 5 hydroxytryptamine (serotonin) receptor 4                                                                           | Cluster0015_Large intestine-related |
| 1431693_a_at | Il17b                                   | interleukin 17B                                                                                                      | Cluster0015_Large intestine-related |
| 1423276_at   | Ildr1                                   | immunoglobulin-like domain containing receptor 1                                                                     | Cluster0015_Large intestine-related |
| 1449493_at   | InsI5                                   | insulin-like 5                                                                                                       | Cluster0015_Large intestine-related |
| 1429159_at   | Itih5                                   | inter-alpha (globulin) inhibitor H5                                                                                  | Cluster0015_Large intestine-related |
| 1418499_a_at | Kcne3                                   | potassium voltage-gated channel, Isk-related subfamily, gene 3                                                       | Cluster0015_Large intestine-related |
| 1449568_at   | Klb                                     | klotho beta                                                                                                          | Cluster0015_Large intestine-related |
| 1417686_at   | Lgals12                                 | lectin, galactose binding, soluble 12                                                                                | Cluster0015_Large intestine-related |
| 1420762_a_at | LOC100045903 /// Ybx2                   | similar to Y box protein 2 /// Y box protein 2                                                                       | Cluster0015_Large intestine-related |
| 1417538_at   | LOC100046775 /// Slc35a1                | similar to CMP-sialic acid transporter /// solute carrier family 35 (CMP-sialic acid transporter), member 1          | Cluster0015_Large intestine-related |
| 1416554_at   | LOC100048338 /// Pdlim1                 | similar to Pdlim1 protein /// PDZ and LIM domain 1 (elfin)                                                           | Cluster0015_Large intestine-related |
| 1416744_at   | LOC640502 /// Uap1                      | similar to UDP-N-acetylhexosamine pyrophosphorylase /// UDP-N-acetylglucosamine pyrophosphorylase 1                  | Cluster0015_Large intestine-related |
| 1416745_x_at | LOC640502 /// Uap1                      | similar to UDP-N-acetylhexosamine pyrophosphorylase /// UDP-N-acetylglucosamine pyrophosphorylase 1                  | Cluster0015_Large intestine-related |
| 1448998_at   | Lpo                                     | lactoperoxidase                                                                                                      | Cluster0015_Large intestine-related |
| 1429368_at   | Lrig3                                   | leucine-rich repeats and immunoglobulin-like domains 3                                                               | Cluster0015_Large intestine-related |
| 1435323_a_at | Mboat1                                  | membrane bound O-acyltransferase domain containing 1                                                                 | Cluster0015_Large intestine-related |
| 1434151_at   | Mettl7a1                                | methyltransferase like 7A1                                                                                           | Cluster0015_Large intestine-related |
| 1454858_x_at | Mettl7a1                                | methyltransferase like 7A1                                                                                           | Cluster0015_Large intestine-related |
| 1427195_at   | NA                                      | ---                                                                                                                  | Cluster0015_Large intestine-related |
| 1435265_at   | NA                                      | ---                                                                                                                  | Cluster0015_Large intestine-related |
| 1438223_at   | NA                                      | ---                                                                                                                  | Cluster0015_Large intestine-related |
| 1439614_at   | NA                                      | ---                                                                                                                  | Cluster0015_Large intestine-related |
| 1442067_at   | NA                                      | ---                                                                                                                  | Cluster0015_Large intestine-related |
| 1443882_at   | NA                                      | ---                                                                                                                  | Cluster0015_Large intestine-related |
| 1445968_at   | NA                                      | ---                                                                                                                  | Cluster0015_Large intestine-related |
| 1447370_at   | NA                                      | ---                                                                                                                  | Cluster0015_Large intestine-related |
| 1448022_at   | NA                                      | ---                                                                                                                  | Cluster0015_Large intestine-related |
| 1459354_at   | NA                                      | ---                                                                                                                  | Cluster0015_Large intestine-related |
| 1459495_at   | NA                                      | ---                                                                                                                  | Cluster0015_Large intestine-related |
| 1460152_at   | NA                                      | ---                                                                                                                  | Cluster0015_Large intestine-related |
| 1417773_at   | Nans                                    | N-acetylneuraminic acid synthase (sialic acid synthase)                                                              | Cluster0015_Large intestine-related |
| 1417774_at   | Nans                                    | N-acetylneuraminic acid synthase (sialic acid synthase)                                                              | Cluster0015_Large intestine-related |
| 1424502_at   | Oit1                                    | oncprotein induced transcript 1                                                                                      | Cluster0015_Large intestine-related |
| 1421507_at   | Olfir78                                 | olfactory receptor 78                                                                                                | Cluster0015_Large intestine-related |

|              |                   |                                                                                                             |                                     |
|--------------|-------------------|-------------------------------------------------------------------------------------------------------------|-------------------------------------|
| 1440009_at   | Olf78             | olfactory receptor 78                                                                                       | Cluster0015_Large intestine-related |
| 1424214_at   | Parm1             | prostate androgen-regulated mucin-like protein 1                                                            | Cluster0015_Large intestine-related |
| 1428891_at   | Parm1             | prostate androgen-regulated mucin-like protein 1                                                            | Cluster0015_Large intestine-related |
| 1452705_at   | Pdxdc1            | pyridoxal-dependent decarboxylase domain containing 1                                                       | Cluster0015_Large intestine-related |
| 1460662_at   | Per3              | period homolog 3 (Drosophila)                                                                               | Cluster0015_Large intestine-related |
| 1451502_at   | Pla2g10           | phospholipase A2, group X                                                                                   | Cluster0015_Large intestine-related |
| 1455408_at   | Pla2g4f           | phospholipase A2, group IVF                                                                                 | Cluster0015_Large intestine-related |
| 1452398_at   | Plice1            | phospholipase C, epsilon 1                                                                                  | Cluster0015_Large intestine-related |
| 1420440_at   | Ppy               | pancreatic polypeptide                                                                                      | Cluster0015_Large intestine-related |
| 1423223_a_at | Prdx6             | peroxiredoxin 6                                                                                             | Cluster0015_Large intestine-related |
| 1429463_at   | Prkaa2            | protein kinase, AMP-activated, alpha 2 catalytic subunit                                                    | Cluster0015_Large intestine-related |
| 1424689_at   | Prss32            | protease, serine, 32                                                                                        | Cluster0015_Large intestine-related |
| 1454267_a_at | Prss32            | protease, serine, 32                                                                                        | Cluster0015_Large intestine-related |
| 1424865_at   | Pyy               | peptide YY                                                                                                  | Cluster0015_Large intestine-related |
| 1418368_at   | Retnlb            | resistin like beta                                                                                          | Cluster0015_Large intestine-related |
| 1449166_at   | S100a14           | S100 calcium binding protein A14                                                                            | Cluster0015_Large intestine-related |
| 1419075_s_at | Saa1              | serum amyloid A 1                                                                                           | Cluster0015_Large intestine-related |
| 1450788_at   | Saa1              | serum amyloid A 1                                                                                           | Cluster0015_Large intestine-related |
| 1449326_x_at | Saa2              | serum amyloid A 2                                                                                           | Cluster0015_Large intestine-related |
| 1427017_at   | Satb2             | special AT-rich sequence binding protein 2                                                                  | Cluster0015_Large intestine-related |
| 1418475_at   | Scnn1b            | sodium channel, nonvoltage-gated 1 beta                                                                     | Cluster0015_Large intestine-related |
| 1417580_s_at | Selenbp1          | selenium binding protein 1                                                                                  | Cluster0015_Large intestine-related |
| 1434776_at   | Sema5a            | sema domain, seven thrombospondin repeats (type 1 and type 1-like), transmembrane domain (TM) and s         | Cluster0015_Large intestine-related |
| 1421752_a_at | Serpinh5          | serine (or cysteine) peptidase inhibitor, clade B, member 5                                                 | Cluster0015_Large intestine-related |
| 1424623_at   | Serpinh5          | serine (or cysteine) peptidase inhibitor, clade B, member 5                                                 | Cluster0015_Large intestine-related |
| 1432023_a_at | Slc17a9           | solute carrier family 17, member 9                                                                          | Cluster0015_Large intestine-related |
| 1438824_at   | Slc20a1           | solute carrier family 20, member 1                                                                          | Cluster0015_Large intestine-related |
| 1421145_at   | Slc26a2           | solute carrier family 26 (sulfate transporter), member 2                                                    | Cluster0015_Large intestine-related |
| 1421445_at   | Slc26a3           | solute carrier family 26, member 3                                                                          | Cluster0015_Large intestine-related |
| 1427547_a_at | Slc26a3           | solute carrier family 26, member 3                                                                          | Cluster0015_Large intestine-related |
| 1429467_s_at | Slc26a3           | solute carrier family 26, member 3                                                                          | Cluster0015_Large intestine-related |
| 1453151_at   | Slc26a3           | solute carrier family 26, member 3                                                                          | Cluster0015_Large intestine-related |
| 1420503_at   | Slc6a14           | solute carrier family 6 (neurotransmitter transporter), member 14                                           | Cluster0015_Large intestine-related |
| 1420504_at   | Slc6a14           | solute carrier family 6 (neurotransmitter transporter), member 14                                           | Cluster0015_Large intestine-related |
| 1423115_at   | ST6galnac6        | ST6 (alpha-N-acetyl-neuraminyl-2,3-beta-galactosyl-1,3)-N-acetylgalactosaminide alpha-2,6-sialyltransferase | Cluster0015_Large intestine-related |
| 1449409_at   | Sult1c2           | sulfotransferase family, cytosolic, 1C, member 2                                                            | Cluster0015_Large intestine-related |
| 1420400_at   | Sval1             | seminal vesicle antigen-like 1                                                                              | Cluster0015_Large intestine-related |
| 1434803_a_at | Sycn              | syncollin                                                                                                   | Cluster0015_Large intestine-related |
| 1451228_a_at | Sycn              | syncollin                                                                                                   | Cluster0015_Large intestine-related |
| 1418091_at   | Tcfcp2l1          | transcription factor CP2-like 1                                                                             | Cluster0015_Large intestine-related |
| 1421355_at   | Tgm3              | transglutaminase 3, E polypeptide                                                                           | Cluster0015_Large intestine-related |
| 1440150_at   | Tgm3              | transglutaminase 3, E polypeptide                                                                           | Cluster0015_Large intestine-related |
| 1418520_at   | Tgoln1            | trans-golgi network protein                                                                                 | Cluster0015_Large intestine-related |
| 1423309_at   | Tgoln1            | trans-golgi network protein                                                                                 | Cluster0015_Large intestine-related |
| 1423307_s_at | Tgoln1 /// Tgoln2 | trans-golgi network protein /// trans-golgi network protein 2                                               | Cluster0015_Large intestine-related |
| 1449388_at   | Thbs4             | thrombospondin 4                                                                                            | Cluster0015_Large intestine-related |
| 1419154_at   | Tmprss2           | transmembrane protease, serine 2                                                                            | Cluster0015_Large intestine-related |
| 1450813_a_at | Tnni1             | troponin I, skeletal, slow 1                                                                                | Cluster0015_Large intestine-related |
| 1439347_at   | Tns4              | tensin 4                                                                                                    | Cluster0015_Large intestine-related |
| 1444254_at   | Tns4              | tensin 4                                                                                                    | Cluster0015_Large intestine-related |
| 1452766_at   | Tppp              | tubulin polymerization promoting protein                                                                    | Cluster0015_Large intestine-related |
| 1417957_a_at | Tspan1            | tetraspanin 1                                                                                               | Cluster0015_Large intestine-related |
| 1417958_at   | Tspan1            | tetraspanin 1                                                                                               | Cluster0015_Large intestine-related |
| 1455780_at   | Ttl6              | tubulin tyrosine ligase-like family, member 6                                                               | Cluster0015_Large intestine-related |
| 1452385_at   | Usp53             | ubiquitin specific peptidase 53                                                                             | Cluster0015_Large intestine-related |
| 1424196_at   | Yip1              | Yip1 domain family, member 1                                                                                | Cluster0015_Large intestine-related |
| 1421614_at   | Zan               | zonadhesin                                                                                                  | Cluster0015_Large intestine-related |



|              |                                                |                                                                                                                              |                                     |
|--------------|------------------------------------------------|------------------------------------------------------------------------------------------------------------------------------|-------------------------------------|
| 1438794_x_at | Gm15483 /// Gm6573 /// Gm6834 /// LOC100044992 | predicted gene 15483 /// ribosomal protein S13 pseudogene /// predicted pseudogene 6834 /// similar to ribosomal protein S13 | Cluster0016_House keeping-Ribosomal |
| 1423665_a_at | Gm15500 /// Rpl5                               | predicted pseudogene 15500 /// ribosomal protein L5                                                                          | Cluster0016_House keeping-Ribosomal |
| 1435725_x_at | Gm16519 /// Gm6285 /// Gm6336 /// LOC100044992 | predicted gene, 16519 /// predicted gene 6285 /// ribosomal protein L12 pseudogene /// similar to 60S ribosomal protein L12  | Cluster0016_House keeping-Ribosomal |
| 1438776_x_at | Gm2614 /// Gm6402 /// Rps17                    | predicted gene 2614 /// ribosomal protein S17 pseudogene /// ribosomal protein S17                                           | Cluster0016_House keeping-Ribosomal |
| 1459986_a_at | Gm2614 /// Rps17                               | predicted gene 2614 /// ribosomal protein S17                                                                                | Cluster0016_House keeping-Ribosomal |
| 1426659_a_at | Gm3362 /// Rpl23a                              | predicted pseudogene 3362 /// ribosomal protein L23a                                                                         | Cluster0016_House keeping-Ribosomal |
| 1415942_at   | Gm3379 /// Gm4892 /// Gm7476 /// Rpl10         | predicted gene 3379 /// ribosomal protein 10 pseudogene /// 60S ribosomal protein L10 (QM protein homolog)                   | Cluster0016_House keeping-Ribosomal |
| 1416217_a_at | Gm4149 /// Rpl37a                              | predicted pseudogene 4149 /// ribosomal protein L37a                                                                         | Cluster0016_House keeping-Ribosomal |
| 1437706_x_at | Gm5805 /// Rps14                               | predicted gene 5805 /// ribosomal protein S14                                                                                | Cluster0016_House keeping-Ribosomal |
| 1415912_a_at | Gm6573 /// Gm6834 /// LOC100044992             | ribosomal protein S13 pseudogene /// predicted pseudogene 6834 /// similar to ribosomal protein S13                          | Cluster0016_House keeping-Ribosomal |
| 1448142_x_at | Gm6573 /// LOC100044992 /// Rps13              | ribosomal protein S13 pseudogene /// similar to ribosomal protein S13                                                        | Cluster0016_House keeping-Ribosomal |
| 1428530_x_at | Gm6948 /// Gm8942 /// LOC677113 /// Rpl10      | ribosomal protein S24 pseudogene /// predicted gene 8942 /// similar to ribosomal protein S24                                | Cluster0016_House keeping-Ribosomal |
| 1455364_a_at | Gm7285 /// Rps7                                | predicted gene 7285 /// ribosomal protein S7                                                                                 | Cluster0016_House keeping-Ribosomal |
| 1449196_a_at | Gm9354 /// LOC100042019 /// Rps27a             | predicted gene 9354 /// similar to fusion protein: ubiquitin (bases 43_513); ribosomal protein S27a (bases 43_513)           | Cluster0016_House keeping-Ribosomal |
| 1460201_a_at | Gm9385 /// Rpl24                               | predicted gene 9385 /// ribosomal protein L24                                                                                | Cluster0016_House keeping-Ribosomal |
| 1426793_a_at | Gm9811 /// Rpl14                               | ribosomal protein L14 pseudogene /// ribosomal protein L14                                                                   | Cluster0016_House keeping-Ribosomal |
| 1455168_a_at | Gnb211                                         | guanine nucleotide binding protein (G protein), beta polypeptide 2 like 1                                                    | Cluster0016_House keeping-Ribosomal |
| 1452506_a_at | llkap                                          | integrin-linked kinase-associated serine/threonine phosphatase 2C                                                            | Cluster0016_House keeping-Ribosomal |
| 1416210_at   | Imp3                                           | IMP3, U3 small nucleolar ribonucleoprotein, homolog (yeast)                                                                  | Cluster0016_House keeping-Ribosomal |
| 1460680_a_at | LOC100044627 /// Rpl23                         | similar to HL23 ribosomal protein /// ribosomal protein L23                                                                  | Cluster0016_House keeping-Ribosomal |
| 1416088_a_at | LOC100046223 /// Rps15                         | similar to insulinoma protein (rig) /// ribosomal protein S15                                                                | Cluster0016_House keeping-Ribosomal |
| 1460175_at   | LOC100046668 /// Rps23                         | similar to yeast ribosomal protein S28 homologue /// ribosomal protein S23                                                   | Cluster0016_House keeping-Ribosomal |
| 1423857_at   | Mrpl30                                         | mitochondrial ribosomal protein L30                                                                                          | Cluster0016_House keeping-Ribosomal |
| 1416669_s_at | Naca                                           | nascent polypeptide-associated complex alpha polypeptide                                                                     | Cluster0016_House keeping-Ribosomal |
| 1448430_a_at | Naca                                           | nascent polypeptide-associated complex alpha polypeptide                                                                     | Cluster0016_House keeping-Ribosomal |
| 1423211_at   | Nop10                                          | NOP10 ribonucleoprotein homolog (yeast)                                                                                      | Cluster0016_House keeping-Ribosomal |
| 1423132_a_at | Nsa2                                           | NSA2 ribosome biogenesis homolog (S. cerevisiae)                                                                             | Cluster0016_House keeping-Ribosomal |
| 1415736_at   | Pfdn5                                          | prefoldin 5                                                                                                                  | Cluster0016_House keeping-Ribosomal |
| 1460637_s_at | Pfdn5                                          | prefoldin 5                                                                                                                  | Cluster0016_House keeping-Ribosomal |
| 1417451_a_at | Ppia                                           | peptidylprolyl isomerase A                                                                                                   | Cluster0016_House keeping-Ribosomal |
| 1460165_at   | Ppp1ca                                         | protein phosphatase 1, catalytic subunit, alpha isoform                                                                      | Cluster0016_House keeping-Ribosomal |
| 1427468_at   | Ppp3cb                                         | protein phosphatase 3, catalytic subunit, beta isoform                                                                       | Cluster0016_House keeping-Ribosomal |
| 1448166_a_at | Psmb1                                          | proteasome (prosome, macropain) subunit, beta type 1                                                                         | Cluster0016_House keeping-Ribosomal |
| 1448157_s_at | Rpl10                                          | ribosomal protein 10                                                                                                         | Cluster0016_House keeping-Ribosomal |
| 1431177_a_at | Rpl10a /// Rpl10a-ps1                          | ribosomal protein L10A /// ribosomal protein L10A, pseudogene 1                                                              | Cluster0016_House keeping-Ribosomal |
| 1417615_a_at | Rpl11                                          | ribosomal protein L11                                                                                                        | Cluster0016_House keeping-Ribosomal |
| 1416026_a_at | Rpl12                                          | ribosomal protein L12                                                                                                        | Cluster0016_House keeping-Ribosomal |
| 1455245_x_at | Rpl13                                          | ribosomal protein L13                                                                                                        | Cluster0016_House keeping-Ribosomal |
| 1417608_a_at | Rpl13a                                         | ribosomal protein L13A                                                                                                       | Cluster0016_House keeping-Ribosomal |
| 1455485_x_at | Rpl13a                                         | ribosomal protein L13A                                                                                                       | Cluster0016_House keeping-Ribosomal |
| 1435873_a_at | Rpl13a /// Zfp526                              | ribosomal protein L13A /// zinc finger protein 526                                                                           | Cluster0016_House keeping-Ribosomal |
| 1449255_a_at | Rpl15                                          | ribosomal protein L15                                                                                                        | Cluster0016_House keeping-Ribosomal |
| 1437005_a_at | Rpl18                                          | ribosomal protein L18                                                                                                        | Cluster0016_House keeping-Ribosomal |
| 1450372_a_at | Rpl18                                          | ribosomal protein L18                                                                                                        | Cluster0016_House keeping-Ribosomal |
| 1428152_a_at | Rpl18a                                         | ribosomal protein L18A                                                                                                       | Cluster0016_House keeping-Ribosomal |
| 1416219_at   | Rpl19                                          | ribosomal protein L19                                                                                                        | Cluster0016_House keeping-Ribosomal |
| 1455767_x_at | Rpl21                                          | ribosomal protein L21                                                                                                        | Cluster0016_House keeping-Ribosomal |
| 1416603_at   | Rpl22                                          | ribosomal protein L22                                                                                                        | Cluster0016_House keeping-Ribosomal |
| 1453118_s_at | Rpl22                                          | ribosomal protein L22                                                                                                        | Cluster0016_House keeping-Ribosomal |
| 1415701_x_at | Rpl23                                          | ribosomal protein L23                                                                                                        | Cluster0016_House keeping-Ribosomal |
| 1426660_x_at | Rpl23a                                         | ribosomal protein L23a                                                                                                       | Cluster0016_House keeping-Ribosomal |
| 1436995_a_at | Rpl26                                          | ribosomal protein L26                                                                                                        | Cluster0016_House keeping-Ribosomal |
| 1448109_a_at | Rpl26                                          | ribosomal protein L26                                                                                                        | Cluster0016_House keeping-Ribosomal |
| 1426661_at   | Rpl27a                                         | ribosomal protein L27A                                                                                                       | Cluster0016_House keeping-Ribosomal |
| 1449323_a_at | Rpl3                                           | ribosomal protein L3                                                                                                         | Cluster0016_House keeping-Ribosomal |
| 1435897_at   | Rpl32                                          | ribosomal protein L32                                                                                                        | Cluster0016_House keeping-Ribosomal |
| 1427875_a_at | Rpl34                                          | ribosomal protein L34                                                                                                        | Cluster0016_House keeping-Ribosomal |



|              |         |                                                                           |                                     |
|--------------|---------|---------------------------------------------------------------------------|-------------------------------------|
| 1438655_a_at | Rpl34   | ribosomal protein L34                                                     | Cluster0016_House keeping-Ribosomal |
| 1434231_x_at | Rpl35   | ribosomal protein L35                                                     | Cluster0016_House keeping-Ribosomal |
| 1436840_x_at | Rpl35   | ribosomal protein L35                                                     | Cluster0016_House keeping-Ribosomal |
| 1454856_x_at | Rpl35   | ribosomal protein L35                                                     | Cluster0016_House keeping-Ribosomal |
| 1455950_x_at | Rpl35   | ribosomal protein L35                                                     | Cluster0016_House keeping-Ribosomal |
| 1448697_s_at | Rpl36al | ribosomal protein L36A-like                                               | Cluster0016_House keeping-Ribosomal |
| 1434872_x_at | Rpl37   | ribosomal protein L37                                                     | Cluster0016_House keeping-Ribosomal |
| 1453729_a_at | Rpl37   | ribosomal protein L37                                                     | Cluster0016_House keeping-Ribosomal |
| 1460543_x_at | Rpl37a  | ribosomal protein L37a                                                    | Cluster0016_House keeping-Ribosomal |
| 1450840_a_at | Rpl39   | ribosomal protein L39                                                     | Cluster0016_House keeping-Ribosomal |
| 1425183_a_at | Rpl4    | ribosomal protein L4                                                      | Cluster0016_House keeping-Ribosomal |
| 1422623_x_at | Rpl41   | ribosomal protein L41                                                     | Cluster0016_House keeping-Ribosomal |
| 1416546_a_at | Rpl6    | ribosomal protein L6                                                      | Cluster0016_House keeping-Ribosomal |
| 1415979_x_at | Rpl7    | ribosomal protein L7                                                      | Cluster0016_House keeping-Ribosomal |
| 1426162_a_at | Rpl7    | ribosomal protein L7                                                      | Cluster0016_House keeping-Ribosomal |
| 1426163_x_at | Rpl7    | ribosomal protein L7                                                      | Cluster0016_House keeping-Ribosomal |
| 1422613_a_at | Rpl7a   | ribosomal protein L7A                                                     | Cluster0016_House keeping-Ribosomal |
| 1417762_a_at | Rpl8    | ribosomal protein L8                                                      | Cluster0016_House keeping-Ribosomal |
| 1419441_at   | Rplp0   | ribosomal protein, large, P0                                              | Cluster0016_House keeping-Ribosomal |
| 1416277_a_at | Rplp1   | ribosomal protein, large, P1                                              | Cluster0016_House keeping-Ribosomal |
| 1415879_a_at | Rplp2   | ribosomal protein, large P2                                               | Cluster0016_House keeping-Ribosomal |
| 1416719_a_at | Rps10   | ribosomal protein S10                                                     | Cluster0016_House keeping-Ribosomal |
| 1434854_a_at | Rps10   | ribosomal protein S10                                                     | Cluster0016_House keeping-Ribosomal |
| 1438723_a_at | Rps10   | ribosomal protein S10                                                     | Cluster0016_House keeping-Ribosomal |
| 1439374_x_at | Rps10   | ribosomal protein S10                                                     | Cluster0016_House keeping-Ribosomal |
| 1456497_x_at | Rps10   | ribosomal protein S10                                                     | Cluster0016_House keeping-Ribosomal |
| 1424000_a_at | Rps11   | ribosomal protein S11                                                     | Cluster0016_House keeping-Ribosomal |
| 1433432_x_at | Rps12   | ribosomal protein S12                                                     | Cluster0016_House keeping-Ribosomal |
| 1436586_x_at | Rps14   | ribosomal protein S14                                                     | Cluster0016_House keeping-Ribosomal |
| 1416089_at   | Rps15   | ribosomal protein S15                                                     | Cluster0016_House keeping-Ribosomal |
| 1453467_s_at | Rps15a  | ribosomal protein S15A                                                    | Cluster0016_House keeping-Ribosomal |
| 1437510_x_at | Rps17   | ribosomal protein S17                                                     | Cluster0016_House keeping-Ribosomal |
| 1438986_x_at | Rps17   | ribosomal protein S17                                                     | Cluster0016_House keeping-Ribosomal |
| 1455662_x_at | Rps17   | ribosomal protein S17                                                     | Cluster0016_House keeping-Ribosomal |
| 1449243_a_at | Rps19   | ribosomal protein S19                                                     | Cluster0016_House keeping-Ribosomal |
| 1431766_x_at | Rps2    | ribosomal protein S2                                                      | Cluster0016_House keeping-Ribosomal |
| 1456373_x_at | Rps20   | ribosomal protein S20                                                     | Cluster0016_House keeping-Ribosomal |
| 1456436_x_at | Rps20   | ribosomal protein S20                                                     | Cluster0016_House keeping-Ribosomal |
| 1430288_x_at | Rps21   | ribosomal protein S21                                                     | Cluster0016_House keeping-Ribosomal |
| 1433549_x_at | Rps21   | ribosomal protein S21                                                     | Cluster0016_House keeping-Ribosomal |
| 1433721_x_at | Rps21   | ribosomal protein S21                                                     | Cluster0016_House keeping-Ribosomal |
| 1434358_x_at | Rps21   | ribosomal protein S21                                                     | Cluster0016_House keeping-Ribosomal |
| 1436064_x_at | Rps24   | ribosomal protein S24                                                     | Cluster0016_House keeping-Ribosomal |
| 1453362_x_at | Rps24   | ribosomal protein S24                                                     | Cluster0016_House keeping-Ribosomal |
| 1456628_x_at | Rps24   | ribosomal protein S24                                                     | Cluster0016_House keeping-Ribosomal |
| 1451068_s_at | Rps25   | ribosomal protein S25                                                     | Cluster0016_House keeping-Ribosomal |
| 1415876_a_at | Rps26   | ribosomal protein S26                                                     | Cluster0016_House keeping-Ribosomal |
| 1435151_a_at | Rps3    | ribosomal protein S3                                                      | Cluster0016_House keeping-Ribosomal |
| 1416276_a_at | Rps4x   | ribosomal protein S4, X-linked                                            | Cluster0016_House keeping-Ribosomal |
| 1416054_at   | Rps5    | ribosomal protein S5                                                      | Cluster0016_House keeping-Ribosomal |
| 1419364_a_at | Rps7    | ribosomal protein S7                                                      | Cluster0016_House keeping-Ribosomal |
| 1435593_x_at | Rps7    | ribosomal protein S7                                                      | Cluster0016_House keeping-Ribosomal |
| 1437610_x_at | Rps8    | ribosomal protein S8                                                      | Cluster0016_House keeping-Ribosomal |
| 1455319_x_at | Rps8    | ribosomal protein S8                                                      | Cluster0016_House keeping-Ribosomal |
| 1433689_s_at | Rps9    | ribosomal protein S9                                                      | Cluster0016_House keeping-Ribosomal |
| 1448784_at   | Taf10   | TAF10 RNA polymerase II, TATA box binding protein (TBP)-associated factor | Cluster0016_House keeping-Ribosomal |
| 1416642_a_at | Tpt1    | tumor protein, translationally-controlled 1                               | Cluster0016_House keeping-Ribosomal |

|              |                  |                                                                                                        |                                               |
|--------------|------------------|--------------------------------------------------------------------------------------------------------|-----------------------------------------------|
| 1452701_x_at | Uba52            | ubiquitin A-52 residue ribosomal protein fusion product 1                                              | Cluster0016_House keeping-Ribosomal           |
| 1427878_at   | 0610010012Rik    | RIKEN cDNA 0610010012 gene                                                                             | Cluster0017_Small and large intestine-related |
| 1428671_at   | 2200002D01Rik    | RIKEN cDNA 2200002D01 gene                                                                             | Cluster0017_Small and large intestine-related |
| 1451441_at   | 2210415F13Rik    | RIKEN cDNA 2210415F13 gene                                                                             | Cluster0017_Small and large intestine-related |
| 1453511_at   | 2310007B03Rik    | RIKEN cDNA 2310007B03 gene                                                                             | Cluster0017_Small and large intestine-related |
| 1432464_a_at | 2310057J16Rik    | RIKEN cDNA 2310057J16 gene                                                                             | Cluster0017_Small and large intestine-related |
| 1436345_at   | 5730559C18Rik    | RIKEN cDNA 5730559C18 gene                                                                             | Cluster0017_Small and large intestine-related |
| 1451326_at   | Abhd14b          | abhydrolase domain containing 14b                                                                      | Cluster0017_Small and large intestine-related |
| 1454647_at   | Acad11 /// Nphp3 | acyl-Coenzyme A dehydrogenase family, member 11 /// nephronophthisis 3 (adolescent)                    | Cluster0017_Small and large intestine-related |
| 1415984_at   | Acadm            | acyl-Coenzyme A dehydrogenase, medium chain                                                            | Cluster0017_Small and large intestine-related |
| 1460216_at   | Acads            | acyl-Coenzyme A dehydrogenase, short chain                                                             | Cluster0017_Small and large intestine-related |
| 1429267_at   | Acot11           | acyl-CoA thioesterase 11                                                                               | Cluster0017_Small and large intestine-related |
| 1433725_at   | Acvr1b           | activin A receptor, type 1B                                                                            | Cluster0017_Small and large intestine-related |
| 1416225_at   | Adh1             | alcohol dehydrogenase 1 (class I)                                                                      | Cluster0017_Small and large intestine-related |
| 1460190_at   | Ap1m2            | adaptor protein complex AP-1, mu 2 subunit                                                             | Cluster0017_Small and large intestine-related |
| 1451526_at   | Arhgap12         | Rho GTPase activating protein 12                                                                       | Cluster0017_Small and large intestine-related |
| 1418453_a_at | Atp1b1           | ATPase, Na+/K+ transporting, beta 1 polypeptide                                                        | Cluster0017_Small and large intestine-related |
| 1439036_a_at | Atp1b1           | ATPase, Na+/K+ transporting, beta 1 polypeptide                                                        | Cluster0017_Small and large intestine-related |
| 1455396_at   | Atp8b1           | ATPase, class I, type 8B, member 1                                                                     | Cluster0017_Small and large intestine-related |
| 1415932_x_at | Atp9a            | ATPase, class II, type 9A                                                                              | Cluster0017_Small and large intestine-related |
| 1427604_a_at | Atp9a            | ATPase, class II, type 9A                                                                              | Cluster0017_Small and large intestine-related |
| 1442028_at   | B4galnt2         | beta-1,4-N-acetyl-galactosaminyl transferase 2                                                         | Cluster0017_Small and large intestine-related |
| 1441213_at   | BC021891         | cDNA sequence BC021891                                                                                 | Cluster0017_Small and large intestine-related |
| 1459904_at   | BC030870         | cDNA sequence BC030870                                                                                 | Cluster0017_Small and large intestine-related |
| 1428792_at   | Bcas1            | breast carcinoma amplified sequence 1                                                                  | Cluster0017_Small and large intestine-related |
| 1426959_at   | Bdh1             | 3-hydroxybutyrate dehydrogenase, type 1                                                                | Cluster0017_Small and large intestine-related |
| 1452257_at   | Bdh1             | 3-hydroxybutyrate dehydrogenase, type 1                                                                | Cluster0017_Small and large intestine-related |
| 1423635_at   | Bmp2             | bone morphogenetic protein 2                                                                           | Cluster0017_Small and large intestine-related |
| 1433709_at   | Cant1            | calcium activated nucleotidase 1                                                                       | Cluster0017_Small and large intestine-related |
| 1422666_at   | Cblc             | Casitas B-lineage lymphoma c                                                                           | Cluster0017_Small and large intestine-related |
| 1460051_at   | Ccdc64b          | coiled-coil domain containing 64B                                                                      | Cluster0017_Small and large intestine-related |
| 1436197_at   | Cdc42bpg         | CDC42 binding protein kinase gamma (DMPK-like)                                                         | Cluster0017_Small and large intestine-related |
| 1418712_at   | Cdc42ep5         | CDC42 effector protein (Rho GTPase binding) 5                                                          | Cluster0017_Small and large intestine-related |
| 1427095_at   | Cdcp1            | CUB domain containing protein 1                                                                        | Cluster0017_Small and large intestine-related |
| 1448261_at   | Cdh1             | cadherin 1                                                                                             | Cluster0017_Small and large intestine-related |
| 1448564_at   | Cib1             | calcium and integrin binding 1 (calmyrin)                                                              | Cluster0017_Small and large intestine-related |
| 1435017_at   | Cisd3            | CDGSH iron sulfur domain 3                                                                             | Cluster0017_Small and large intestine-related |
| 1424409_at   | Cldn23           | claudin 23                                                                                             | Cluster0017_Small and large intestine-related |
| 1434651_a_at | Cldn3            | claudin 3                                                                                              | Cluster0017_Small and large intestine-related |
| 1451701_x_at | Cldn3            | claudin 3                                                                                              | Cluster0017_Small and large intestine-related |
| 1460569_x_at | Cldn3            | claudin 3                                                                                              | Cluster0017_Small and large intestine-related |
| 1448393_at   | Cldn7            | claudin 7                                                                                              | Cluster0017_Small and large intestine-related |
| 1423073_at   | Cmpk1            | cytidine monophosphate (UMP-CMP) kinase 1                                                              | Cluster0017_Small and large intestine-related |
| 1418709_at   | Cox7a1           | cytochrome c oxidase, subunit VIIa 1                                                                   | Cluster0017_Small and large intestine-related |
| 1434851_s_at | Crb3             | crumbs homolog 3 (Drosophila)                                                                          | Cluster0017_Small and large intestine-related |
| 1416326_at   | Crip1            | cysteine-rich protein 1 (intestinal)                                                                   | Cluster0017_Small and large intestine-related |
| 1427033_at   | Dnmbp            | dynamilin binding protein                                                                              | Cluster0017_Small and large intestine-related |
| 1423376_a_at | Dok4             | docking protein 4                                                                                      | Cluster0017_Small and large intestine-related |
| 1426911_at   | Dsc2             | desmocollin 2                                                                                          | Cluster0017_Small and large intestine-related |
| 1449741_at   | Dsg2             | Desmoglein 2                                                                                           | Cluster0017_Small and large intestine-related |
| 1435494_s_at | Dsp              | desmoplakin                                                                                            | Cluster0017_Small and large intestine-related |
| 1448491_at   | Ech1             | enoyl coenzyme A hydratase 1, peroxisomal                                                              | Cluster0017_Small and large intestine-related |
| 1416895_at   | Efna1            | ephrin A1                                                                                              | Cluster0017_Small and large intestine-related |
| 1416916_at   | Elf3             | E74-like factor 3                                                                                      | Cluster0017_Small and large intestine-related |
| 1434489_at   | Elmo3            | engulfment and cell motility 3, ced-12 homolog (C. elegans)                                            | Cluster0017_Small and large intestine-related |
| 1416579_a_at | Epcam            | epithelial cell adhesion molecule                                                                      | Cluster0017_Small and large intestine-related |
| 1424919_at   | ErbB2            | v-erb-b2 erythroblastic leukemia viral oncogene homolog 2, neuro/glioblastoma derived oncogene homolog | Cluster0017_Small and large intestine-related |

|              |                         |                                                                                                      |                                               |
|--------------|-------------------------|------------------------------------------------------------------------------------------------------|-----------------------------------------------|
| 1426880_at   | Etl4                    | enhancer trap locus 4                                                                                | Cluster0017_Small and large intestine-related |
| 1419133_at   | Evpl                    | envoplakin                                                                                           | Cluster0017_Small and large intestine-related |
| 1424595_at   | F11r                    | F11 receptor                                                                                         | Cluster0017_Small and large intestine-related |
| 1456611_at   | Fam13a                  | family with sequence similarity 13, member A                                                         | Cluster0017_Small and large intestine-related |
| 1426996_at   | Fam83h                  | family with sequence similarity 83, member H                                                         | Cluster0017_Small and large intestine-related |
| 1452273_at   | Fam83h                  | family with sequence similarity 83, member H                                                         | Cluster0017_Small and large intestine-related |
| 1426872_at   | Fcgbp                   | Fc fragment of IgG binding protein                                                                   | Cluster0017_Small and large intestine-related |
| 1455604_at   | Fzd5                    | frizzled homolog 5 (Drosophila)                                                                      | Cluster0017_Small and large intestine-related |
| 1454078_a_at | Gal3st1                 | galactose-3-O-sulfotransferase 1                                                                     | Cluster0017_Small and large intestine-related |
| 1424140_at   | Gale                    | galactose-4-epimerase, UDP                                                                           | Cluster0017_Small and large intestine-related |
| 1453587_at   | Ggt6                    | gamma-glutamyltransferase 6                                                                          | Cluster0017_Small and large intestine-related |
| 1419330_a_at | Gpa33                   | glycoprotein A33 (transmembrane)                                                                     | Cluster0017_Small and large intestine-related |
| 1423891_at   | Gstt3                   | glutathione S-transferase, theta 3                                                                   | Cluster0017_Small and large intestine-related |
| 1460184_at   | Hadh                    | hydroxyacyl-Coenzyme A dehydrogenase                                                                 | Cluster0017_Small and large intestine-related |
| 1427000_at   | Hnf4a                   | hepatic nuclear factor 4, alpha                                                                      | Cluster0017_Small and large intestine-related |
| 1427001_s_at | Hnf4a                   | hepatic nuclear factor 4, alpha                                                                      | Cluster0017_Small and large intestine-related |
| 1454243_at   | Ick                     | intestinal cell kinase                                                                               | Cluster0017_Small and large intestine-related |
| 1455687_at   | Ick                     | intestinal cell kinase                                                                               | Cluster0017_Small and large intestine-related |
| 1450704_at   | Ihh                     | Indian hedgehog                                                                                      | Cluster0017_Small and large intestine-related |
| 1456200_at   | Ipmk                    | inositol polyphosphate multikinase                                                                   | Cluster0017_Small and large intestine-related |
| 1418301_at   | Irf6                    | interferon regulatory factor 6                                                                       | Cluster0017_Small and large intestine-related |
| 1427387_a_at | Itgb4                   | integrin beta 4                                                                                      | Cluster0017_Small and large intestine-related |
| 1426873_s_at | Jup                     | junction plakoglobin                                                                                 | Cluster0017_Small and large intestine-related |
| 1417395_at   | Klf4                    | Kruppel-like factor 4 (gut)                                                                          | Cluster0017_Small and large intestine-related |
| 1451021_a_at | Klf5                    | Kruppel-like factor 5                                                                                | Cluster0017_Small and large intestine-related |
| 1420647_a_at | Krt8                    | keratin 8                                                                                            | Cluster0017_Small and large intestine-related |
| 1423691_x_at | Krt8                    | keratin 8                                                                                            | Cluster0017_Small and large intestine-related |
| 1435989_x_at | Krt8                    | keratin 8                                                                                            | Cluster0017_Small and large intestine-related |
| 1432474_a_at | Krtcap3                 | keratinocyte associated protein 3                                                                    | Cluster0017_Small and large intestine-related |
| 1418449_at   | Lad1                    | ladinin                                                                                              | Cluster0017_Small and large intestine-related |
| 1451336_at   | Lgals4                  | lectin, galactose binding, soluble 4                                                                 | Cluster0017_Small and large intestine-related |
| 1423938_at   | Lig12 /// LOC100047332  | lethal giant larvae homolog 2 (Drosophila) /// similar to Lethal giant larvae homolog 2 (Drosophila) | Cluster0017_Small and large intestine-related |
| 1435452_at   | LOC100047579 /// Tmem20 | similar to transmembrane protein 20 /// transmembrane protein 2C                                     | Cluster0017_Small and large intestine-related |
| 1449099_at   | Lrba                    | LPS-responsive beige-like anchor                                                                     | Cluster0017_Small and large intestine-related |
| 1435461_at   | Magi3                   | membrane associated guanylate kinase, WW and PDZ domain containing 3                                 | Cluster0017_Small and large intestine-related |
| 1448871_at   | Mapk13                  | mitogen-activated protein kinase 13                                                                  | Cluster0017_Small and large intestine-related |
| 1427060_at   | Mapk3                   | mitogen-activated protein kinase 3                                                                   | Cluster0017_Small and large intestine-related |
| 1426914_at   | Marveld2                | MARVEL (membrane-associating) domain containing 2                                                    | Cluster0017_Small and large intestine-related |
| 1451764_at   | Marveld3                | MARVEL (membrane-associating) domain containing 3                                                    | Cluster0017_Small and large intestine-related |
| 1453264_at   | Marveld3                | MARVEL (membrane-associating) domain containing 3                                                    | Cluster0017_Small and large intestine-related |
| 1435641_at   | Mgat4a                  | mannoside acetylglucosaminyltransferase 4, isoenzyme A                                               | Cluster0017_Small and large intestine-related |
| 1429284_at   | Mobkl2b                 | MOB1, Mps One Binder kinase activator-like 2B (yeast)                                                | Cluster0017_Small and large intestine-related |
| 1451540_at   | Mpi                     | mannose phosphate isomerase                                                                          | Cluster0017_Small and large intestine-related |
| 1418797_at   | Ms4a8a                  | membrane-spanning 4-domains, subfamily A, member 8A                                                  | Cluster0017_Small and large intestine-related |
| 1427374_at   | Muc3                    | mucin 3, intestinal                                                                                  | Cluster0017_Small and large intestine-related |
| 1425506_at   | Mylk                    | myosin, light polypeptide kinase                                                                     | Cluster0017_Small and large intestine-related |
| 1435463_s_at | Myo1d                   | myosin ID                                                                                            | Cluster0017_Small and large intestine-related |
| 1440220_at   | NA                      | ---                                                                                                  | Cluster0017_Small and large intestine-related |
| 1425298_a_at | Naip1                   | NLR family, apoptosis inhibitory protein 1                                                           | Cluster0017_Small and large intestine-related |
| 1425723_at   | Nr1i2                   | nuclear receptor subfamily 1, group I, member 2                                                      | Cluster0017_Small and large intestine-related |
| 1451807_at   | Nr1i2                   | nuclear receptor subfamily 1, group I, member 2                                                      | Cluster0017_Small and large intestine-related |
| 1453187_at   | Ociad2                  | OCIA domain containing 2                                                                             | Cluster0017_Small and large intestine-related |
| 1452294_at   | Pcdh1                   | protocadherin 1                                                                                      | Cluster0017_Small and large intestine-related |
| 1417180_at   | Pcsk7                   | proprotein convertase subtilisin/kexin type 7                                                        | Cluster0017_Small and large intestine-related |
| 1449403_at   | Pde9a                   | phosphodiesterase 9A                                                                                 | Cluster0017_Small and large intestine-related |
| 1450060_at   | Pigr                    | polymeric immunoglobulin receptor                                                                    | Cluster0017_Small and large intestine-related |
| 1455490_at   | Pigr                    | polymeric immunoglobulin receptor                                                                    | Cluster0017_Small and large intestine-related |

|              |                                     |                                                                                                    |                                               |
|--------------|-------------------------------------|----------------------------------------------------------------------------------------------------|-----------------------------------------------|
| 1437112_at   | Pld1                                | phospholipase D1                                                                                   | Cluster0017_Small and large intestine-related |
| 1454819_at   | Plekha8                             | pleckstrin homology domain containing, family A (phosphoinositide binding specific) member 8       | Cluster0017_Small and large intestine-related |
| 1427492_at   | Pof1b                               | premature ovarian failure 1B                                                                       | Cluster0017_Small and large intestine-related |
| 1451210_at   | Ppap2c                              | phosphatidic acid phosphatase type 2C                                                              | Cluster0017_Small and large intestine-related |
| 1428344_at   | Ppapdc2                             | phosphatidic acid phosphatase type 2 domain containing 2                                           | Cluster0017_Small and large intestine-related |
| 1454902_at   | Prkcz                               | protein kinase C, zeta                                                                             | Cluster0017_Small and large intestine-related |
| 1433870_at   | Prr15l                              | proline rich 15-like                                                                               | Cluster0017_Small and large intestine-related |
| 1418320_at   | Prss8                               | protease, serine, 8 (prostasin)                                                                    | Cluster0017_Small and large intestine-related |
| 1418924_at   | Rassf7                              | Ras association (RalGDS/AF-6) domain family (N-terminal) member 7                                  | Cluster0017_Small and large intestine-related |
| 1416230_at   | Rfk                                 | riboflavin kinase                                                                                  | Cluster0017_Small and large intestine-related |
| 1442819_at   | Rhbdl2                              | rhomboid, veinlet-like 2 (Drosophila)                                                              | Cluster0017_Small and large intestine-related |
| 1431805_a_at | Rhpn2                               | rhophilin, Rho GTPase binding protein 2                                                            | Cluster0017_Small and large intestine-related |
| 1434628_a_at | Rhpn2                               | rhophilin, Rho GTPase binding protein 2                                                            | Cluster0017_Small and large intestine-related |
| 1425792_a_at | Rorc                                | RAR-related orphan receptor gamma                                                                  | Cluster0017_Small and large intestine-related |
| 1424090_at   | Sdcbp2                              | syndecan binding protein (syntenin) 2                                                              | Cluster0017_Small and large intestine-related |
| 1427082_at   | Sdr42e1                             | short chain dehydrogenase/reductase family 42E, member 1                                           | Cluster0017_Small and large intestine-related |
| 1419478_at   | Sectm1b                             | secreted and transmembrane 1B                                                                      | Cluster0017_Small and large intestine-related |
| 1449202_at   | Sema4g                              | sema domain, immunoglobulin domain (Ig), transmembrane domain (TM) and short cytoplasmic domain, ( | Cluster0017_Small and large intestine-related |
| 1421938_at   | Serhl                               | serine hydrolase-like                                                                              | Cluster0017_Small and large intestine-related |
| 1434145_s_at | Serhl                               | serine hydrolase-like                                                                              | Cluster0017_Small and large intestine-related |
| 1434382_at   | Serinc2                             | serine incorporator 2                                                                              | Cluster0017_Small and large intestine-related |
| 1457867_at   | Sgpp2                               | sphingosine-1-phosphate phosphatase 2                                                              | Cluster0017_Small and large intestine-related |
| 1422629_s_at | Shroom3                             | shroom family member 3                                                                             | Cluster0017_Small and large intestine-related |
| 1451854_a_at | Shroom3                             | shroom family member 3                                                                             | Cluster0017_Small and large intestine-related |
| 1454211_a_at | Shroom3                             | shroom family member 3                                                                             | Cluster0017_Small and large intestine-related |
| 1429648_at   | Slc35a3                             | solute carrier family 35 (UDP-N-acetylglucosamine (UDP-GlcNAc) transporter), member 3              | Cluster0017_Small and large intestine-related |
| 1426601_at   | Slc37a1                             | solute carrier family 37 (glycerol-3-phosphate transporter), member 1                              | Cluster0017_Small and large intestine-related |
| 1425108_a_at | Smagp                               | small cell adhesion glycoprotein                                                                   | Cluster0017_Small and large intestine-related |
| 1415938_at   | Spink3                              | serine peptidase inhibitor, Kazal type 3                                                           | Cluster0017_Small and large intestine-related |
| 1451935_a_at | Spint2                              | serine protease inhibitor, Kunitz type 2                                                           | Cluster0017_Small and large intestine-related |
| 1435937_at   | Sptlc2                              | serine palmitoyltransferase, long chain base subunit 2                                             | Cluster0017_Small and large intestine-related |
| 1437190_at   | Styk1                               | serine/threonine/tyrosine kinase 1                                                                 | Cluster0017_Small and large intestine-related |
| 1451455_at   | Thns12                              | threonine synthase-like 2 (bacterial)                                                              | Cluster0017_Small and large intestine-related |
| 1417896_at   | Tjp3                                | tight junction protein 3                                                                           | Cluster0017_Small and large intestine-related |
| 1427178_at   | Tmc4                                | transmembrane channel-like gene family 4                                                           | Cluster0017_Small and large intestine-related |
| 1433579_at   | Tmem30b                             | transmembrane protein 30B                                                                          | Cluster0017_Small and large intestine-related |
| 1424357_at   | Tmem45b                             | transmembrane protein 45b                                                                          | Cluster0017_Small and large intestine-related |
| 1418344_at   | Tmem8                               | transmembrane protein 8 (five membrane-spanning domains)                                           | Cluster0017_Small and large intestine-related |
| 1460377_a_at | Tmem8                               | transmembrane protein 8 (five membrane-spanning domains)                                           | Cluster0017_Small and large intestine-related |
| 1426302_at   | Tmprss4                             | transmembrane protease, serine 4                                                                   | Cluster0017_Small and large intestine-related |
| 1459666_at   | Trak1                               | trafficking protein, kinesin binding 1                                                             | Cluster0017_Small and large intestine-related |
| 1424649_a_at | Tspan8                              | tetraspanin 8                                                                                      | Cluster0017_Small and large intestine-related |
| 1428358_at   | Zg16                                | zymogen granule protein 16                                                                         | Cluster0017_Small and large intestine-related |
| 1428359_s_at | Zg16                                | zymogen granule protein 16                                                                         | Cluster0017_Small and large intestine-related |
| 1431984_at   | 1700007F19Rik                       | RIKEN cDNA 1700007F19 gene                                                                         | Cluster0018_Low in some Paneth cells          |
| 1431612_at   | 1700007J10Rik                       | RIKEN cDNA 1700007J10 gene                                                                         | Cluster0018_Low in some Paneth cells          |
| 1453333_at   | 1700012P22Rik                       | RIKEN cDNA 1700012P22 gene                                                                         | Cluster0018_Low in some Paneth cells          |
| 1441741_at   | 1700024B05Rik /// Gm7995 /// Gm8267 | RIKEN cDNA 1700024B05 gene /// predicted gene 7995 /// predicted gene 8267                         | Cluster0018_Low in some Paneth cells          |
| 1453459_at   | 1700028I16Rik /// LOC100046441      | RIKEN cDNA 1700028I16 gene /// hypothetical protein LOC100046441                                   | Cluster0018_Low in some Paneth cells          |
| 1440768_x_at | 1700052I22Rik                       | RIKEN cDNA 1700052I22 gene                                                                         | Cluster0018_Low in some Paneth cells          |
| 1431599_at   | 2310069B03Rik                       | RIKEN cDNA 2310069B03 gene                                                                         | Cluster0018_Low in some Paneth cells          |
| 1444220_at   | 2410089E03Rik                       | RIKEN cDNA 2410089E03 gene                                                                         | Cluster0018_Low in some Paneth cells          |
| 1453922_at   | 4921539H07Rik                       | RIKEN cDNA 4921539H07 gene                                                                         | Cluster0018_Low in some Paneth cells          |
| 1433136_at   | 4930432H08Rik                       | RIKEN cDNA 4930432H08 gene                                                                         | Cluster0018_Low in some Paneth cells          |
| 1431671_at   | 4930447A16Rik                       | RIKEN cDNA 4930447A16 gene                                                                         | Cluster0018_Low in some Paneth cells          |
| 1432457_at   | 4930448F12Rik                       | RIKEN cDNA 4930448F12 gene                                                                         | Cluster0018_Low in some Paneth cells          |
| 1453910_at   | 4930500A05Rik                       | RIKEN cDNA 4930500A05 gene                                                                         | Cluster0018_Low in some Paneth cells          |

|              |                                  |                                                                                                |                                      |
|--------------|----------------------------------|------------------------------------------------------------------------------------------------|--------------------------------------|
| 1453948_at   | 4930529K09Rik                    | RIKEN cDNA 4930529K09 gene                                                                     | Cluster0018_Low in some Paneth cells |
| 1432274_at   | 4930543N07Rik                    | RIKEN cDNA 4930543N07 gene                                                                     | Cluster0018_Low in some Paneth cells |
| 1454298_at   | 4932430A15Rik                    | RIKEN cDNA 4932430A15 gene                                                                     | Cluster0018_Low in some Paneth cells |
| 1454341_at   | 4933404I11Rik                    | RIKEN cDNA 4933404I11 gene                                                                     | Cluster0018_Low in some Paneth cells |
| 1432370_at   | 4933411E02Rik                    | RIKEN cDNA 4933411E02 gene                                                                     | Cluster0018_Low in some Paneth cells |
| 1432117_at   | 4933422A05Rik                    | RIKEN cDNA 4933422A05 gene                                                                     | Cluster0018_Low in some Paneth cells |
| 1431895_at   | 4933434M16Rik                    | RIKEN cDNA 4933434M16 gene                                                                     | Cluster0018_Low in some Paneth cells |
| 1460533_at   | 4933440K10Rik                    | RIKEN cDNA 4933440K10 gene                                                                     | Cluster0018_Low in some Paneth cells |
| 1432945_at   | 5230400M06Rik                    | RIKEN cDNA 5230400M06 gene                                                                     | Cluster0018_Low in some Paneth cells |
| 1433153_at   | 9030201C23Rik                    | RIKEN cDNA 9030201C23 gene                                                                     | Cluster0018_Low in some Paneth cells |
| 1446547_at   | 9330175E14Rik                    | RIKEN cDNA 9330175E14 gene                                                                     | Cluster0018_Low in some Paneth cells |
| 1430464_at   | 9430021M05Rik                    | RIKEN cDNA 9430021M05 gene                                                                     | Cluster0018_Low in some Paneth cells |
| 1420158_s_at | Abcf1                            | ATP-binding cassette, sub-family F (GCN20), member 1                                           | Cluster0018_Low in some Paneth cells |
| 1449247_at   | Actrt2                           | actin-related protein T2                                                                       | Cluster0018_Low in some Paneth cells |
| 1459247_at   | Agbl3                            | ATP/GTP binding protein-like 3                                                                 | Cluster0018_Low in some Paneth cells |
| 1432512_at   | Agbl4                            | ATP/GTP binding protein-like 4                                                                 | Cluster0018_Low in some Paneth cells |
| 1442759_at   | Akt1                             | Thymoma viral proto-oncogene 1                                                                 | Cluster0018_Low in some Paneth cells |
| 1425907_s_at | Amot                             | angiominin                                                                                     | Cluster0018_Low in some Paneth cells |
| 1450145_at   | Ankrd5                           | ankyrin repeat domain 5                                                                        | Cluster0018_Low in some Paneth cells |
| 1441144_at   | Arr3                             | arrestin 3, retinal                                                                            | Cluster0018_Low in some Paneth cells |
| 1442796_at   | Atf7ip2                          | activating transcription factor 7 interacting protein 2                                        | Cluster0018_Low in some Paneth cells |
| 1460640_at   | Atox1                            | ATX1 (antioxidant protein 1) homolog 1 (yeast)                                                 | Cluster0018_Low in some Paneth cells |
| 1438512_at   | BC048679                         | cDNA sequence BC048679                                                                         | Cluster0018_Low in some Paneth cells |
| 1430052_at   | C030048H21Rik                    | RIKEN cDNA C030048H21 gene                                                                     | Cluster0018_Low in some Paneth cells |
| 1431656_at   | C630050I24Rik                    | RIKEN cDNA C630050I24 gene                                                                     | Cluster0018_Low in some Paneth cells |
| 1442705_at   | C76938                           | expressed sequence C76938                                                                      | Cluster0018_Low in some Paneth cells |
| 1447197_at   | C86544                           | expressed sequence C86544                                                                      | Cluster0018_Low in some Paneth cells |
| 1432497_at   | Ccdc93                           | coiled-coil domain containing 93                                                               | Cluster0018_Low in some Paneth cells |
| 1455365_at   | Cdh8                             | cadherin 8                                                                                     | Cluster0018_Low in some Paneth cells |
| 1446111_at   | D14Ert611e                       | DNA segment, Chr 14, ERATO Doi 611, expressed                                                  | Cluster0018_Low in some Paneth cells |
| 1425222_x_at | D630002G06Rik                    | RIKEN cDNA D630002G06 gene                                                                     | Cluster0018_Low in some Paneth cells |
| 1443395_at   | D6Ert490e                        | DNA segment, Chr 6, ERATO Doi 490, expressed                                                   | Cluster0018_Low in some Paneth cells |
| 1431171_at   | D730001G18Rik                    | RIKEN cDNA D730001G18 gene                                                                     | Cluster0018_Low in some Paneth cells |
| 1446979_at   | Dcps                             | Decapping enzyme, scavenger                                                                    | Cluster0018_Low in some Paneth cells |
| 1429480_at   | Ddi1                             | DDI1, DNA-damage inducible 1, homolog 1 (S. cerevisiae)                                        | Cluster0018_Low in some Paneth cells |
| 1427784_at   | Defb13                           | defensin beta 13                                                                               | Cluster0018_Low in some Paneth cells |
| 1425447_at   | Dkk4                             | dickkopf homolog 4 (Xenopus laevis)                                                            | Cluster0018_Low in some Paneth cells |
| 1440797_at   | Dlx6os2                          | Dlx6 opposite strand transcript 2                                                              | Cluster0018_Low in some Paneth cells |
| 1429746_at   | Efcab9                           | EF-hand calcium binding domain 9                                                               | Cluster0018_Low in some Paneth cells |
| 1432829_at   | Eno1 /// Gm5506 /// LOC100047043 | enolase 1, alpha non-neuron /// predicted gene 5506 /// similar to enolase 1, alpha non-neuron | Cluster0018_Low in some Paneth cells |
| 1453955_a_at | Fam122c                          | family with sequence similarity 122, member C                                                  | Cluster0018_Low in some Paneth cells |
| 1430141_at   | Fam13c                           | family with sequence similarity 13, member C                                                   | Cluster0018_Low in some Paneth cells |
| 1427845_at   | Fgfr4                            | fibroblast growth factor receptor 4                                                            | Cluster0018_Low in some Paneth cells |
| 1451706_a_at | Gabra6                           | gamma-aminobutyric acid (GABA) A receptor, subunit alpha 6                                     | Cluster0018_Low in some Paneth cells |
| 1419634_a_at | Ghrh                             | growth hormone releasing hormone                                                               | Cluster0018_Low in some Paneth cells |
| 1443372_at   | Gm2990                           | predicted gene 2990                                                                            | Cluster0018_Low in some Paneth cells |
| 1443460_at   | Gm4250                           | Predicted gene 4250                                                                            | Cluster0018_Low in some Paneth cells |
| 1436437_at   | Gm97                             | predicted gene 97                                                                              | Cluster0018_Low in some Paneth cells |
| 1453297_at   | Golga7b                          | golgi autoantigen, golgin subfamily a, 7B                                                      | Cluster0018_Low in some Paneth cells |
| 1430504_at   | Gprc2a-rs5                       | G protein-coupled receptor, family C, group 2, member A, related sequence 5                    | Cluster0018_Low in some Paneth cells |
| 1420462_at   | Il1rapl2                         | interleukin 1 receptor accessory protein-like 2                                                | Cluster0018_Low in some Paneth cells |
| 1417436_at   | Large                            | like-glycosyltransferase                                                                       | Cluster0018_Low in some Paneth cells |
| 1449894_at   | Lrrc18                           | leucine rich repeat containing 18                                                              | Cluster0018_Low in some Paneth cells |
| 1432716_at   | Lrrn1                            | leucine rich repeat protein 1, neuronal                                                        | Cluster0018_Low in some Paneth cells |
| 1458922_at   | Map3k9                           | mitogen-activated protein kinase kinase kinase 9                                               | Cluster0018_Low in some Paneth cells |
| 1460508_at   | Mrpl1                            | mitochondrial ribosomal protein L1                                                             | Cluster0018_Low in some Paneth cells |
| 1459299_at   | Myo3b                            | myosin IIIB                                                                                    | Cluster0018_Low in some Paneth cells |

|              |                 |                                                                |                                      |
|--------------|-----------------|----------------------------------------------------------------|--------------------------------------|
| 1420289_at   | NA              | ---                                                            | Cluster0018_Low in some Paneth cells |
| 1433055_at   | NA              | ---                                                            | Cluster0018_Low in some Paneth cells |
| 1437720_at   | NA              | ---                                                            | Cluster0018_Low in some Paneth cells |
| 1439303_at   | NA              | ---                                                            | Cluster0018_Low in some Paneth cells |
| 1439335_at   | NA              | ---                                                            | Cluster0018_Low in some Paneth cells |
| 1440601_at   | NA              | ---                                                            | Cluster0018_Low in some Paneth cells |
| 1441419_at   | NA              | ---                                                            | Cluster0018_Low in some Paneth cells |
| 1441882_at   | NA              | ---                                                            | Cluster0018_Low in some Paneth cells |
| 1442419_at   | NA              | ---                                                            | Cluster0018_Low in some Paneth cells |
| 1442653_at   | NA              | ---                                                            | Cluster0018_Low in some Paneth cells |
| 1442689_at   | NA              | ---                                                            | Cluster0018_Low in some Paneth cells |
| 1443463_at   | NA              | ---                                                            | Cluster0018_Low in some Paneth cells |
| 1443469_at   | NA              | ---                                                            | Cluster0018_Low in some Paneth cells |
| 1444825_at   | NA              | ---                                                            | Cluster0018_Low in some Paneth cells |
| 1444915_at   | NA              | ---                                                            | Cluster0018_Low in some Paneth cells |
| 1444925_at   | NA              | ---                                                            | Cluster0018_Low in some Paneth cells |
| 1444954_at   | NA              | ---                                                            | Cluster0018_Low in some Paneth cells |
| 1445168_at   | NA              | ---                                                            | Cluster0018_Low in some Paneth cells |
| 1445469_at   | NA              | ---                                                            | Cluster0018_Low in some Paneth cells |
| 1445648_at   | NA              | ---                                                            | Cluster0018_Low in some Paneth cells |
| 1445800_at   | NA              | ---                                                            | Cluster0018_Low in some Paneth cells |
| 1446020_at   | NA              | ---                                                            | Cluster0018_Low in some Paneth cells |
| 1446264_at   | NA              | ---                                                            | Cluster0018_Low in some Paneth cells |
| 1446420_at   | NA              | ---                                                            | Cluster0018_Low in some Paneth cells |
| 1446762_at   | NA              | ---                                                            | Cluster0018_Low in some Paneth cells |
| 1446794_at   | NA              | ---                                                            | Cluster0018_Low in some Paneth cells |
| 1446839_at   | NA              | ---                                                            | Cluster0018_Low in some Paneth cells |
| 1446913_at   | NA              | ---                                                            | Cluster0018_Low in some Paneth cells |
| 1447022_at   | NA              | ---                                                            | Cluster0018_Low in some Paneth cells |
| 1447134_at   | NA              | ---                                                            | Cluster0018_Low in some Paneth cells |
| 1447239_at   | NA              | ---                                                            | Cluster0018_Low in some Paneth cells |
| 1447309_at   | NA              | ---                                                            | Cluster0018_Low in some Paneth cells |
| 1449727_x_at | NA              | ---                                                            | Cluster0018_Low in some Paneth cells |
| 1449776_at   | NA              | ---                                                            | Cluster0018_Low in some Paneth cells |
| 1449793_at   | NA              | ---                                                            | Cluster0018_Low in some Paneth cells |
| 1452576_at   | NA              | ---                                                            | Cluster0018_Low in some Paneth cells |
| 1456522_at   | NA              | ---                                                            | Cluster0018_Low in some Paneth cells |
| 1457192_at   | NA              | ---                                                            | Cluster0018_Low in some Paneth cells |
| 1458271_at   | NA              | ---                                                            | Cluster0018_Low in some Paneth cells |
| 1458734_at   | NA              | ---                                                            | Cluster0018_Low in some Paneth cells |
| 1458776_at   | NA              | ---                                                            | Cluster0018_Low in some Paneth cells |
| 1458794_at   | NA              | ---                                                            | Cluster0018_Low in some Paneth cells |
| 1459017_at   | NA              | ---                                                            | Cluster0018_Low in some Paneth cells |
| 1459369_at   | NA              | ---                                                            | Cluster0018_Low in some Paneth cells |
| 1459528_at   | NA              | ---                                                            | Cluster0018_Low in some Paneth cells |
| 1459686_at   | NA              | ---                                                            | Cluster0018_Low in some Paneth cells |
| 1460504_at   | NA              | ---                                                            | Cluster0018_Low in some Paneth cells |
| 1456575_at   | Ndn             | Necdin                                                         | Cluster0018_Low in some Paneth cells |
| 1429507_at   | Nkd1            | naked cuticle 1 homolog (Drosophila)                           | Cluster0018_Low in some Paneth cells |
| 1460312_at   | Olf157          | olfactory receptor 157                                         | Cluster0018_Low in some Paneth cells |
| 1450592_at   | Olf68 /// Olf69 | olfactory receptor 68 /// olfactory receptor 69                | Cluster0018_Low in some Paneth cells |
| 1440350_at   | Panx2           | pannexin 2                                                     | Cluster0018_Low in some Paneth cells |
| 1432999_at   | Pde11a          | phosphodiesterase 11A                                          | Cluster0018_Low in some Paneth cells |
| 1431625_at   | Pde1a           | phosphodiesterase 1A, calmodulin-dependent                     | Cluster0018_Low in some Paneth cells |
| 1431348_at   | Ppifos          | peptidylprolyl isomerase F, opposite strand transcription unit | Cluster0018_Low in some Paneth cells |
| 1415835_at   | Prl3b1          | prolactin family 3, subfamily b, member 1                      | Cluster0018_Low in some Paneth cells |
| 1430528_at   | Sdcbp           | syndecan binding protein                                       | Cluster0018_Low in some Paneth cells |

|              |               |                                                                                    |                                      |
|--------------|---------------|------------------------------------------------------------------------------------|--------------------------------------|
| 1440523_at   | Sdr16c5       | short chain dehydrogenase/reductase family 16C, member 5                           | Cluster0018_Low in some Paneth cells |
| 1441636_at   | Sec14I5       | SEC14-like 5 ( <i>S. cerevisiae</i> )                                              | Cluster0018_Low in some Paneth cells |
| 1456508_at   | Skint10       | selection and upkeep of intraepithelial T cells 10                                 | Cluster0018_Low in some Paneth cells |
| 1418358_at   | Smcp          | sperm mitochondria-associated cysteine-rich protein                                | Cluster0018_Low in some Paneth cells |
| 1443726_at   | Smyd1         | SET and MYND domain containing 1                                                   | Cluster0018_Low in some Paneth cells |
| 1443727_x_at | Smyd1         | SET and MYND domain containing 1                                                   | Cluster0018_Low in some Paneth cells |
| 1426320_at   | Snx29         | sorting nexin 29                                                                   | Cluster0018_Low in some Paneth cells |
| 1427609_at   | Sox14         | SRY-box containing gene 14                                                         | Cluster0018_Low in some Paneth cells |
| 1441390_at   | Spdya         | speedy homolog A ( <i>Xenopus laevis</i> )                                         | Cluster0018_Low in some Paneth cells |
| 1422672_at   | Sprr1b        | small proline-rich protein 1B                                                      | Cluster0018_Low in some Paneth cells |
| 1448062_at   | Stk11         | serine/threonine kinase 11                                                         | Cluster0018_Low in some Paneth cells |
| 1439544_at   | Tbc1d5        | TBC1 domain family, member 5                                                       | Cluster0018_Low in some Paneth cells |
| 1432437_at   | Tmem217       | transmembrane protein 217                                                          | Cluster0018_Low in some Paneth cells |
| 1449644_at   | Trav12d-1     | T cell receptor alpha variable 12d-1                                               | Cluster0018_Low in some Paneth cells |
| 1420333_at   | Txndc8        | thioredoxin domain containing 8                                                    | Cluster0018_Low in some Paneth cells |
| 1457242_at   | Ubox5         | U box domain containing 5                                                          | Cluster0018_Low in some Paneth cells |
| 1451565_s_at | Uroc1         | urocanase domain containing 1                                                      | Cluster0018_Low in some Paneth cells |
| 1452509_at   | Usp9y         | ubiquitin specific peptidase 9, Y chromosome                                       | Cluster0018_Low in some Paneth cells |
| 1427681_s_at | Vmn2r88       | vomeroneasal 2, receptor 88                                                        | Cluster0018_Low in some Paneth cells |
| 1450487_at   | Vsx1          | visual system homeobox 1 homolog (zebrafish)                                       | Cluster0018_Low in some Paneth cells |
| 1458070_at   | Vtcn1         | V-set domain containing T cell activation inhibitor 1                              | Cluster0018_Low in some Paneth cells |
| 1447765_at   | Wdr48         | WD repeat domain 48                                                                | Cluster0018_Low in some Paneth cells |
| 1429221_at   | Wdr85         | WD repeat domain 85                                                                | Cluster0018_Low in some Paneth cells |
| 1438327_at   | Zfp385b       | Zinc finger protein 385B                                                           | Cluster0018_Low in some Paneth cells |
| 1433309_at   | Zfp572        | zinc finger protein 572                                                            | Cluster0018_Low in some Paneth cells |
| 1417886_at   | 1810009A15Rik | RIKEN cDNA 1810009A15 gene                                                         | Cluster0019_House keeping-cell cycle |
| 1436349_at   | 2700094K13Rik | RIKEN cDNA 2700094K13 gene                                                         | Cluster0019_House keeping-cell cycle |
| 1430515_s_at | Aasdhppt      | aminoadipate-semialdehyde dehydrogenase-phosphopantetheinyl transferase            | Cluster0019_House keeping-cell cycle |
| 1432394_a_at | Aatf          | apoptosis antagonizing transcription factor                                        | Cluster0019_House keeping-cell cycle |
| 1423863_at   | Abcf2         | ATP-binding cassette, sub-family F (GCN20), member 2                               | Cluster0019_House keeping-cell cycle |
| 1416569_at   | Actl6a        | actin-like 6A                                                                      | Cluster0019_House keeping-cell cycle |
| 1419130_at   | Adat2         | adenosine deaminase, tRNA-specific 2, TAD2 homolog ( <i>S. cerevisiae</i> )        | Cluster0019_House keeping-cell cycle |
| 1424712_at   | Ahctf1        | AT hook containing transcription factor 1                                          | Cluster0019_House keeping-cell cycle |
| 1416135_at   | Apex1         | apurinic/apryrimidinic endonuclease 1                                              | Cluster0019_House keeping-cell cycle |
| 1437186_at   | BC055324      | cDNA sequence BC055324                                                             | Cluster0019_House keeping-cell cycle |
| 1451144_at   | Brix1         | BRX1, biogenesis of ribosomes, homolog ( <i>S. cerevisiae</i> )                    | Cluster0019_House keeping-cell cycle |
| 1422767_at   | Bysl          | bystin-like                                                                        | Cluster0019_House keeping-cell cycle |
| 1448274_at   | C1qbp         | complement component 1, q subcomponent binding protein                             | Cluster0019_House keeping-cell cycle |
| 1452047_at   | Cacybp        | calyculin binding protein                                                          | Cluster0019_House keeping-cell cycle |
| 1419944_at   | Ccnb1         | Cyclin B1                                                                          | Cluster0019_House keeping-cell cycle |
| 1459987_s_at | Cct3          | chaperonin containing Tcp1, subunit 3 (gamma)                                      | Cluster0019_House keeping-cell cycle |
| 1417258_at   | Cct5          | chaperonin containing Tcp1, subunit 5 (epsilon)                                    | Cluster0019_House keeping-cell cycle |
| 1418184_at   | Cenpm         | centromere protein M                                                               | Cluster0019_House keeping-cell cycle |
| 1416742_at   | Cfdp1         | craniofacial development protein 1                                                 | Cluster0019_House keeping-cell cycle |
| 1452098_at   | Chtf18        | CTF18, chromosome transmission fidelity factor 18 homolog ( <i>S. cerevisiae</i> ) | Cluster0019_House keeping-cell cycle |
| 1423884_at   | Cirh1a        | cirrhosis, autosomal recessive 1A (human)                                          | Cluster0019_House keeping-cell cycle |
| 1448677_at   | Cox4nb        | COX4 neighbor                                                                      | Cluster0019_House keeping-cell cycle |
| 1423964_at   | Cpsf3l        | cleavage and polyadenylation specific factor 3-like                                | Cluster0019_House keeping-cell cycle |
| 1448809_at   | Cse1l         | chromosome segregation 1-like ( <i>S. cerevisiae</i> )                             | Cluster0019_House keeping-cell cycle |
| 1426931_s_at | D19Bwg1357e   | DNA segment, Chr 19, Brigham & Women s Genetics 1357 expressed                     | Cluster0019_House keeping-cell cycle |
| 1416071_at   | Ddx18         | DEAD (Asp-Glu-Ala-Asp) box polypeptide 18                                          | Cluster0019_House keeping-cell cycle |
| 1416751_a_at | Ddx20         | DEAD (Asp-Glu-Ala-Asp) box polypeptide 20                                          | Cluster0019_House keeping-cell cycle |
| 1424161_at   | Ddx27         | DEAD (Asp-Glu-Ala-Asp) box polypeptide 27                                          | Cluster0019_House keeping-cell cycle |
| 1423643_at   | Ddx39         | DEAD (Asp-Glu-Ala-Asp) box polypeptide 39                                          | Cluster0019_House keeping-cell cycle |
| 1427882_at   | Dnttip2       | deoxynucleotidyltransferase, terminal, interacting protein 2                       | Cluster0019_House keeping-cell cycle |
| 1423767_at   | Dpy30         | dpy-30 homolog ( <i>C. elegans</i> )                                               | Cluster0019_House keeping-cell cycle |
| 1428315_at   | Ebna1bp2      | EBNA1 binding protein 2                                                            | Cluster0019_House keeping-cell cycle |

|              |                                      |                                                                                                                             |                                      |
|--------------|--------------------------------------|-----------------------------------------------------------------------------------------------------------------------------|--------------------------------------|
| 1434524_at   | Eif2b3                               | eukaryotic translation initiation factor 2B, subunit 3                                                                      | Cluster0019_House keeping-cell cycle |
| 1451076_s_at | Eif3m                                | eukaryotic translation initiation factor 3, subunit M                                                                       | Cluster0019_House keeping-cell cycle |
| 1417242_at   | Eif4a3                               | eukaryotic translation initiation factor 4A3                                                                                | Cluster0019_House keeping-cell cycle |
| 1428476_a_at | Elac2                                | elac homolog 2 (E. coli)                                                                                                    | Cluster0019_House keeping-cell cycle |
| 1424907_a_at | Farsa                                | phenylalanyl-tRNA synthetase, alpha subunit                                                                                 | Cluster0019_House keeping-cell cycle |
| 1451026_at   | Ftsj3                                | FtsJ homolog 3 (E. coli)                                                                                                    | Cluster0019_House keeping-cell cycle |
| 1424435_a_at | Gart                                 | phosphoribosylglycinamide formyltransferase                                                                                 | Cluster0019_House keeping-cell cycle |
| 1433622_at   | Gemin4                               | gem (nuclear organelle) associated protein 4                                                                                | Cluster0019_House keeping-cell cycle |
| 1436310_at   | Gemin5                               | gem (nuclear organelle) associated protein 5                                                                                | Cluster0019_House keeping-cell cycle |
| 1417913_at   | Gins4                                | GINS complex subunit 4 (Sld5 homolog)                                                                                       | Cluster0019_House keeping-cell cycle |
| 1452171_at   | Grwd1                                | glutamate-rich WD repeat containing 1                                                                                       | Cluster0019_House keeping-cell cycle |
| 1417093_a_at | Gtf2h4                               | general transcription factor II H, polypeptide 4                                                                            | Cluster0019_House keeping-cell cycle |
| 1450980_at   | Gtpbp3                               | GTP binding protein 3                                                                                                       | Cluster0019_House keeping-cell cycle |
| 1415744_at   | H2-Ke2                               | H2-K region expressed gene 2                                                                                                | Cluster0019_House keeping-cell cycle |
| 1417024_at   | Hars                                 | histidyl-tRNA synthetase                                                                                                    | Cluster0019_House keeping-cell cycle |
| 1428061_at   | Hat1                                 | histone aminotransferase 1                                                                                                  | Cluster0019_House keeping-cell cycle |
| 1455488_at   | Haus6                                | HAUS augmin-like complex, subunit 6                                                                                         | Cluster0019_House keeping-cell cycle |
| 1456597_at   | Heatr3                               | HEAT repeat containing 3                                                                                                    | Cluster0019_House keeping-cell cycle |
| 1417541_at   | Hells                                | helicase, lymphoid specific                                                                                                 | Cluster0019_House keeping-cell cycle |
| 1424142_at   | Ikbkap                               | inhibitor of kappa light polypeptide enhancer in B-cells, kinase complex-associated protein                                 | Cluster0019_House keeping-cell cycle |
| 1451254_at   | Ikbkap                               | inhibitor of kappa light polypeptide enhancer in B-cells, kinase complex-associated protein                                 | Cluster0019_House keeping-cell cycle |
| 1417948_s_at | Ilf2                                 | interleukin enhancer binding factor 2                                                                                       | Cluster0019_House keeping-cell cycle |
| 1426213_at   | Imp4                                 | IMP4, U3 small nucleolar ribonucleoprotein, homolog (yeast)                                                                 | Cluster0019_House keeping-cell cycle |
| 1454235_a_at | Ing5                                 | inhibitor of growth family, member 5                                                                                        | Cluster0019_House keeping-cell cycle |
| 1416448_at   | Itpa                                 | inosine triphosphatase (nucleoside triphosphate pyrophosphatase)                                                            | Cluster0019_House keeping-cell cycle |
| 1416068_at   | Kars /// LOC631033                   | lysyl-tRNA synthetase /// similar to lysyl-tRNA synthetase                                                                  | Cluster0019_House keeping-cell cycle |
| 1426783_at   | Kat2a                                | K(lysine) acetyltransferase 2A                                                                                              | Cluster0019_House keeping-cell cycle |
| 1417057_a_at | Lamp3 /// LOC100043444 /// LOC100045 | lysosomal-associated membrane protein 3 /// similar to peptidylprolyl isomerase D /// similar to peptidylprolyl isomerase D | Cluster0019_House keeping-cell cycle |
| 1429558_a_at | Larp7                                | La ribonucleoprotein domain family, member 7                                                                                | Cluster0019_House keeping-cell cycle |
| 1434183_at   | LOC546078 /// Samd1                  | similar to sterile alpha motif domain containing 1 /// sterile alpha motif domain containing 1                              | Cluster0019_House keeping-cell cycle |
| 1448536_at   | Lsm3                                 | LSM3 homolog, U6 small nuclear RNA associated (S. cerevisiae)                                                               | Cluster0019_House keeping-cell cycle |
| 1418656_at   | Lsm5                                 | LSM5 homolog, U6 small nuclear RNA associated (S. cerevisiae)                                                               | Cluster0019_House keeping-cell cycle |
| 1417313_at   | Lsm7                                 | LSM7 homolog, U6 small nuclear RNA associated (S. cerevisiae)                                                               | Cluster0019_House keeping-cell cycle |
| 1431181_a_at | Luc7l                                | Luc7 homolog (S. cerevisiae)-like                                                                                           | Cluster0019_House keeping-cell cycle |
| 1453983_a_at | Mett10d                              | methyltransferase 10 domain containing                                                                                      | Cluster0019_House keeping-cell cycle |
| 1423848_at   | Mphosph6                             | M phase phosphoprotein 6                                                                                                    | Cluster0019_House keeping-cell cycle |
| 1416748_a_at | Mre11a                               | meiotic recombination 11 homolog A (S. cerevisiae)                                                                          | Cluster0019_House keeping-cell cycle |
| 1448373_at   | Mrpl18                               | mitochondrial ribosomal protein L18                                                                                         | Cluster0019_House keeping-cell cycle |
| 1452580_a_at | Mrpl21                               | mitochondrial ribosomal protein L21                                                                                         | Cluster0019_House keeping-cell cycle |
| 1419363_a_at | Mrpl35                               | mitochondrial ribosomal protein L35                                                                                         | Cluster0019_House keeping-cell cycle |
| 1448849_at   | Mrpl40                               | mitochondrial ribosomal protein L40                                                                                         | Cluster0019_House keeping-cell cycle |
| 1451164_a_at | Mrps18b                              | mitochondrial ribosomal protein S18B                                                                                        | Cluster0019_House keeping-cell cycle |
| 1424577_at   | Msto1                                | misato homolog 1 (Drosophila)                                                                                               | Cluster0019_House keeping-cell cycle |
| 1423431_a_at | Mybbp1a                              | MYB binding protein (P160) 1a                                                                                               | Cluster0019_House keeping-cell cycle |
| 1418024_at   | Naa15                                | N(alpha)-acetyltransferase 15, NatA auxiliary subunit                                                                       | Cluster0019_House keeping-cell cycle |
| 1416042_s_at | Nasp                                 | nuclear autoantigenic sperm protein (histone-binding)                                                                       | Cluster0019_House keeping-cell cycle |
| 1416972_at   | Nhp21l                               | NHP2 non-histone chromosome protein 2-like 1 (S. cerevisiae)                                                                | Cluster0019_House keeping-cell cycle |
| 1448480_at   | Nip7                                 | nuclear import 7 homolog (S. cerevisiae)                                                                                    | Cluster0019_House keeping-cell cycle |
| 1448133_at   | Nmd3                                 | NMD3 homolog (S. cerevisiae)                                                                                                | Cluster0019_House keeping-cell cycle |
| 1454957_at   | Nob1                                 | NIN1/RPN12 binding protein 1 homolog (S. cerevisiae)                                                                        | Cluster0019_House keeping-cell cycle |
| 1426286_at   | Noc3l                                | nucleolar complex associated 3 homolog (S. cerevisiae)                                                                      | Cluster0019_House keeping-cell cycle |
| 1423826_at   | Noc4l                                | nucleolar complex associated 4 homolog (S. cerevisiae)                                                                      | Cluster0019_House keeping-cell cycle |
| 1423827_s_at | Noc4l                                | nucleolar complex associated 4 homolog (S. cerevisiae)                                                                      | Cluster0019_House keeping-cell cycle |
| 1429338_a_at | Nol9                                 | nucleolar protein 9                                                                                                         | Cluster0019_House keeping-cell cycle |
| 1428870_at   | Nolc1                                | nucleolar and coiled-body phosphoprotein 1                                                                                  | Cluster0019_House keeping-cell cycle |
| 1450087_a_at | Nolc1                                | nucleolar and coiled-body phosphoprotein 1                                                                                  | Cluster0019_House keeping-cell cycle |
| 1424019_at   | Nop2                                 | NOP2 nucleolar protein homolog (yeast)                                                                                      | Cluster0019_House keeping-cell cycle |



|              |          |                                                                           |                                      |
|--------------|----------|---------------------------------------------------------------------------|--------------------------------------|
| 1426533_at   | Nop56    | NOP56 ribonucleoprotein homolog (yeast)                                   | Cluster0019_House keeping-cell cycle |
| 1450986_at   | Nop58    | NOP58 ribonucleoprotein homolog (yeast)                                   | Cluster0019_House keeping-cell cycle |
| 1423850_at   | Nsun2    | NOL1/NOP2/Sun domain family member 2                                      | Cluster0019_House keeping-cell cycle |
| 1423787_at   | Nup133   | nucleoporin 133                                                           | Cluster0019_House keeping-cell cycle |
| 1418530_at   | Nup160   | nucleoporin 160                                                           | Cluster0019_House keeping-cell cycle |
| 1427047_at   | Nup188   | nucleoporin 188                                                           | Cluster0019_House keeping-cell cycle |
| 1432188_s_at | Nup43    | nucleoporin 43                                                            | Cluster0019_House keeping-cell cycle |
| 1424291_at   | Nup93    | nucleoporin 93                                                            | Cluster0019_House keeping-cell cycle |
| 1449017_at   | Nutf2    | nuclear transport factor 2                                                | Cluster0019_House keeping-cell cycle |
| 1422663_at   | Orc1l    | origin recognition complex, subunit 1-like ( <i>S. cerevisiae</i> )       | Cluster0019_House keeping-cell cycle |
| 1418226_at   | Orc2l    | origin recognition complex, subunit 2-like ( <i>S. cerevisiae</i> )       | Cluster0019_House keeping-cell cycle |
| 1418227_at   | Orc2l    | origin recognition complex, subunit 2-like ( <i>S. cerevisiae</i> )       | Cluster0019_House keeping-cell cycle |
| 1423060_at   | Pa2g4    | proliferation-associated 2G4                                              | Cluster0019_House keeping-cell cycle |
| 1425042_s_at | Pelp1    | proline, glutamic acid and leucine rich protein 1                         | Cluster0019_House keeping-cell cycle |
| 1416172_at   | Pes1     | pescadillo homolog 1, containing BRCT domain (zebrafish)                  | Cluster0019_House keeping-cell cycle |
| 1460215_at   | Polr1a   | polymerase (RNA) I polypeptide A                                          | Cluster0019_House keeping-cell cycle |
| 1417041_at   | Polr1c   | polymerase (RNA) I polypeptide C                                          | Cluster0019_House keeping-cell cycle |
| 1416341_at   | Polr2c   | polymerase (RNA) II (DNA directed) polypeptide C                          | Cluster0019_House keeping-cell cycle |
| 1424473_at   | Polr2h   | polymerase (RNA) II (DNA directed) polypeptide H                          | Cluster0019_House keeping-cell cycle |
| 1431506_s_at | Ppih     | peptidyl prolyl isomerase H                                               | Cluster0019_House keeping-cell cycle |
| 1435821_s_at | Ppp1r8   | protein phosphatase 1, regulatory (inhibitor) subunit 8                   | Cluster0019_House keeping-cell cycle |
| 1426381_at   | Pprc1    | peroxisome proliferative activated receptor, gamma, coactivator-related 1 | Cluster0019_House keeping-cell cycle |
| 1427439_s_at | Prmt5    | protein arginine N-methyltransferase 5                                    | Cluster0019_House keeping-cell cycle |
| 1423234_at   | Psmd5    | proteasome (prosome, macropain) 26S subunit, non-ATPase, 5                | Cluster0019_House keeping-cell cycle |
| 1448307_at   | Psmg1    | proteasome (prosome, macropain) assembly chaperone 1                      | Cluster0019_House keeping-cell cycle |
| 1428090_at   | Ptcd3    | pentatricopeptide repeat domain 3                                         | Cluster0019_House keeping-cell cycle |
| 1451365_at   | Rbm19    | RNA binding motif protein 19                                              | Cluster0019_House keeping-cell cycle |
| 1418119_at   | Rbm8a    | RNA binding motif protein 8a                                              | Cluster0019_House keeping-cell cycle |
| 1416177_at   | Rbmxt    | RNA binding motif protein, X chromosome retrogene                         | Cluster0019_House keeping-cell cycle |
| 1449050_at   | Rfc1     | replication factor C (activator 1) 1                                      | Cluster0019_House keeping-cell cycle |
| 1452917_at   | Rfc5     | replication factor C (activator 1) 5                                      | Cluster0019_House keeping-cell cycle |
| 1423481_at   | Riok2    | RIO kinase 2 (yeast)                                                      | Cluster0019_House keeping-cell cycle |
| 1452725_a_at | Rnaseh2a | ribonuclease H2, large subunit                                            | Cluster0019_House keeping-cell cycle |
| 1423293_at   | Rpa1     | replication protein A1                                                    | Cluster0019_House keeping-cell cycle |
| 1452119_at   | Rrp1b    | ribosomal RNA processing 1 homolog B ( <i>S. cerevisiae</i> )             | Cluster0019_House keeping-cell cycle |
| 1451293_at   | Rrp9     | RRP9, small subunit (SSU) processome component, homolog (yeast)           | Cluster0019_House keeping-cell cycle |
| 1416998_at   | Rrs1     | RRS1 ribosome biogenesis regulator homolog ( <i>S. cerevisiae</i> )       | Cluster0019_House keeping-cell cycle |
| 1436728_s_at | Rtel1    | regulator of telomere elongation helicase 1                               | Cluster0019_House keeping-cell cycle |
| 1418564_s_at | Serbp1   | serpine1 mRNA binding protein 1                                           | Cluster0019_House keeping-cell cycle |
| 1453182_a_at | Smpd4    | sphingomyelin phosphodiesterase 4                                         | Cluster0019_House keeping-cell cycle |
| 1451722_s_at | Smyd5    | SET and MYND domain containing 5                                          | Cluster0019_House keeping-cell cycle |
| 1428264_at   | Snrnp40  | small nuclear ribonucleoprotein 40 (U5)                                   | Cluster0019_House keeping-cell cycle |
| 1417352_s_at | Snrpa1   | small nuclear ribonucleoprotein polypeptide A                             | Cluster0019_House keeping-cell cycle |
| 1417353_x_at | Snrpa1   | small nuclear ribonucleoprotein polypeptide A                             | Cluster0019_House keeping-cell cycle |
| 1417726_at   | Sssca1   | Sjogren s syndrome/scleroderma autoantigen 1 homolog (human)              | Cluster0019_House keeping-cell cycle |
| 1415909_at   | Stip1    | stress-induced phosphoprotein 1                                           | Cluster0019_House keeping-cell cycle |
| 1415750_at   | Tbl3     | transducin (beta)-like 3                                                  | Cluster0019_House keeping-cell cycle |
| 1423970_at   | Thoc3    | THO complex 3                                                             | Cluster0019_House keeping-cell cycle |
| 1452672_at   | Thoc5    | THO complex 5                                                             | Cluster0019_House keeping-cell cycle |
| 1417499_at   | Timm10   | translocase of inner mitochondrial membrane 10 homolog (yeast)            | Cluster0019_House keeping-cell cycle |
| 1435883_at   | Tmco7    | transmembrane and coiled-coil domains 7                                   | Cluster0019_House keeping-cell cycle |
| 1456308_x_at | Trim28   | tripartite motif-containing 28                                            | Cluster0019_House keeping-cell cycle |
| 1429294_at   | Trip13   | thyroid hormone receptor interactor 13                                    | Cluster0019_House keeping-cell cycle |
| 1433502_s_at | Tsr1     | TSR1, 20S rRNA accumulation, homolog (yeast)                              | Cluster0019_House keeping-cell cycle |
| 1416280_at   | Uba2     | ubiquitin-like modifier activating enzyme 2                               | Cluster0019_House keeping-cell cycle |
| 1455832_a_at | Umps     | uridine monophosphate synthetase                                          | Cluster0019_House keeping-cell cycle |
| 1416890_at   | Wdr74    | WD repeat domain 74                                                       | Cluster0019_House keeping-cell cycle |

|              |               |                                                                                               |                                         |
|--------------|---------------|-----------------------------------------------------------------------------------------------|-----------------------------------------|
| 1422844_a_at | Wdr77         | WD repeat domain 77                                                                           | Cluster0019_House keeping-cell cycle    |
| 1421054_at   | Xpo4          | exportin 4                                                                                    | Cluster0019_House keeping-cell cycle    |
| 1426654_at   | Zc3hc1        | zinc finger, C3HC type 1                                                                      | Cluster0019_House keeping-cell cycle    |
| 1436020_at   | Zfp828        | zinc finger protein 828                                                                       | Cluster0019_House keeping-cell cycle    |
| 1452880_at   | Znhit3        | zinc finger, HIT type 3                                                                       | Cluster0019_House keeping-cell cycle    |
| 1444605_at   | 1700061F12Rik | RIKEN cDNA 1700061F12 gene                                                                    | Cluster0020_Natural helper cell-related |
| 1421031_a_at | 2310016C08Rik | RIKEN cDNA 2310016C08 gene                                                                    | Cluster0020_Natural helper cell-related |
| 1457535_at   | 4932438A13Rik | RIKEN cDNA 4932438A13 gene                                                                    | Cluster0020_Natural helper cell-related |
| 1439736_at   | 5830453J16Rik | RIKEN cDNA 5830453J16 gene                                                                    | Cluster0020_Natural helper cell-related |
| 1433015_at   | 6330436F06Rik | RIKEN cDNA 6330436F06 gene                                                                    | Cluster0020_Natural helper cell-related |
| 1443044_at   | A830091E24    | hypothetical A830091E24                                                                       | Cluster0020_Natural helper cell-related |
| 1427371_at   | Abca8a        | ATP-binding cassette, sub-family A (ABC1), member 8a                                          | Cluster0020_Natural helper cell-related |
| 1434013_at   | Ablim3        | actin binding LIM protein family, member 3                                                    | Cluster0020_Natural helper cell-related |
| 1430107_at   | Acbd7         | acyl-Coenzyme A binding domain containing 7                                                   | Cluster0020_Natural helper cell-related |
| 1451355_at   | Acer2         | alkaline ceramidase 2                                                                         | Cluster0020_Natural helper cell-related |
| 1455965_at   | Adamts4       | a disintegrin-like and metallopeptidase (reprolysin type) with thrombospondin type 1 motif, 4 | Cluster0020_Natural helper cell-related |
| 1430352_at   | Adamts9       | a disintegrin-like and metallopeptidase (reprolysin type) with thrombospondin type 1 motif, 9 | Cluster0020_Natural helper cell-related |
| 1436099_at   | AI836003      | expressed sequence AI836003                                                                   | Cluster0020_Natural helper cell-related |
| 1438651_a_at | Aplnr         | apelin receptor                                                                               | Cluster0020_Natural helper cell-related |
| 1421134_at   | Areg          | amphiregulin                                                                                  | Cluster0020_Natural helper cell-related |
| 1419549_at   | Arg1          | arginase, liver                                                                               | Cluster0020_Natural helper cell-related |
| 1453590_at   | Arl5b         | ADP-ribosylation factor-like 5B                                                               | Cluster0020_Natural helper cell-related |
| 1447141_at   | AW107722      | expressed sequence AW107722                                                                   | Cluster0020_Natural helper cell-related |
| 1460113_at   | B930093H17Rik | RIKEN cDNA B930093H17 gene                                                                    | Cluster0020_Natural helper cell-related |
| 1423753_at   | Bambi         | BMP and activin membrane-bound inhibitor, homolog ( <i>Xenopus laevis</i> )                   | Cluster0020_Natural helper cell-related |
| 1430581_at   | Bclaf1        | BCL2-associated transcription factor 1                                                        | Cluster0020_Natural helper cell-related |
| 1443227_at   | Bzw2          | basic leucine zipper and W2 domains 2                                                         | Cluster0020_Natural helper cell-related |
| 1442033_at   | C1qtnf9       | C1q and tumor necrosis factor related protein 9                                               | Cluster0020_Natural helper cell-related |
| 1444982_at   | C230007H23Rik | RIKEN cDNA C230007H23 gene                                                                    | Cluster0020_Natural helper cell-related |
| 1452004_at   | Calca         | calcitonin/calcitonin-related polypeptide, alpha                                              | Cluster0020_Natural helper cell-related |
| 1421688_a_at | Ccl1          | chemokine (C-C motif) ligand 1                                                                | Cluster0020_Natural helper cell-related |
| 1417789_at   | Ccl11         | chemokine (C-C motif) ligand 11                                                               | Cluster0020_Natural helper cell-related |
| 1422291_at   | Ccr8          | chemokine (C-C motif) receptor 8                                                              | Cluster0020_Natural helper cell-related |
| 1458345_s_at | Colec11       | collectin sub-family member 11                                                                | Cluster0020_Natural helper cell-related |
| 1418322_at   | Crem          | cAMP responsive element modulator                                                             | Cluster0020_Natural helper cell-related |
| 1449037_at   | Crem          | cAMP responsive element modulator                                                             | Cluster0020_Natural helper cell-related |
| 1427429_at   | Csf2          | colony stimulating factor 2 (granulocyte-macrophage)                                          | Cluster0020_Natural helper cell-related |
| 1434350_at   | Csrnp1        | cysteine-serine-rich nuclear protein 1                                                        | Cluster0020_Natural helper cell-related |
| 1428759_s_at | Cwc25         | CWC25 spliceosome-associated protein homolog ( <i>S. cerevisiae</i> )                         | Cluster0020_Natural helper cell-related |
| 1425832_a_at | Cxcr6         | chemokine (C-X-C motif) receptor 6                                                            | Cluster0020_Natural helper cell-related |
| 1421642_a_at | Cysltr2       | cysteinyl leukotriene receptor 2                                                              | Cluster0020_Natural helper cell-related |
| 1424724_a_at | D16Ertd472e   | DNA segment, Chr 16, ERATO Doi 472, expressed                                                 | Cluster0020_Natural helper cell-related |
| 1441115_at   | D18Ertd232e   | DNA segment, Chr 18, ERATO Doi 232, expressed                                                 | Cluster0020_Natural helper cell-related |
| 1440109_at   | D7Ertd413e    | DNA segment, Chr 7, ERATO Doi 413, expressed                                                  | Cluster0020_Natural helper cell-related |
| 1446761_at   | D8Ertd56e     | DNA segment, Chr 8, ERATO Doi 56, expressed                                                   | Cluster0020_Natural helper cell-related |
| 1442409_at   | D9Wsu90e      | DNA segment, Chr 9, Wayne State University 90, expressed                                      | Cluster0020_Natural helper cell-related |
| 1449823_at   | Dach2         | dachshund 2 ( <i>Drosophila</i> )                                                             | Cluster0020_Natural helper cell-related |
| 1458012_at   | Dach2         | dachshund 2 ( <i>Drosophila</i> )                                                             | Cluster0020_Natural helper cell-related |
| 1428267_at   | Dhx40         | DEAH (Asp-Glu-Ala-His) box polypeptide 40                                                     | Cluster0020_Natural helper cell-related |
| 1437199_at   | Dusp5         | dual specificity phosphatase 5                                                                | Cluster0020_Natural helper cell-related |
| 1418494_at   | Ebf2          | early B-cell factor 2                                                                         | Cluster0020_Natural helper cell-related |
| 1449102_at   | Ebf2          | early B-cell factor 2                                                                         | Cluster0020_Natural helper cell-related |
| 1440096_at   | Ecm2          | extracellular matrix protein 2, female organ and adipocyte specific                           | Cluster0020_Natural helper cell-related |
| 1430370_at   | Eprs          | glutamyl-prolyl-tRNA synthetase                                                               | Cluster0020_Natural helper cell-related |
| 1418323_at   | Fem1b         | feminization 1 homolog b ( <i>C. elegans</i> )                                                | Cluster0020_Natural helper cell-related |
| 1419300_at   | Flt1          | FMS-like tyrosine kinase 1                                                                    | Cluster0020_Natural helper cell-related |
| 1440926_at   | Flt1          | FMS-like tyrosine kinase 1                                                                    | Cluster0020_Natural helper cell-related |

|              |                        |                                                                                                         |                                         |
|--------------|------------------------|---------------------------------------------------------------------------------------------------------|-----------------------------------------|
| 1451756_at   | Flt1                   | FMS-like tyrosine kinase 1                                                                              | Cluster0020_Natural helper cell-related |
| 1422905_s_at | Fmo2                   | flavin containing monooxygenase 2                                                                       | Cluster0020_Natural helper cell-related |
| 1422931_at   | Fosl2                  | fos-like antigen 2                                                                                      | Cluster0020_Natural helper cell-related |
| 1449773_s_at | Gadd45b                | growth arrest and DNA-damage-inducible 45 beta                                                          | Cluster0020_Natural helper cell-related |
| 1429235_at   | Galnt2                 | UDP-N-acetyl-alpha-D-galactosamine:polypeptide N-acetylgalactosaminyltransferase-like 2                 | Cluster0020_Natural helper cell-related |
| 1429236_at   | Galnt2                 | UDP-N-acetyl-alpha-D-galactosamine:polypeptide N-acetylgalactosaminyltransferase-like 2                 | Cluster0020_Natural helper cell-related |
| 1448886_at   | Gata3                  | GATA binding protein 3                                                                                  | Cluster0020_Natural helper cell-related |
| 1453022_at   | Gpihbp1                | GPI-anchored HDL-binding protein 1                                                                      | Cluster0020_Natural helper cell-related |
| 1460123_at   | Gpr1                   | G protein-coupled receptor 1                                                                            | Cluster0020_Natural helper cell-related |
| 1429843_at   | Grrp1                  | glycine/arginine rich protein 1                                                                         | Cluster0020_Natural helper cell-related |
| 1455150_at   | Hecw2                  | HECT, C2 and WW domain containing E3 ubiquitin protein ligase 2                                         | Cluster0020_Natural helper cell-related |
| 1423450_a_at | Hs3st1                 | heparan sulfate (glucosamine) 3-O-sulfotransferase 1                                                    | Cluster0020_Natural helper cell-related |
| 1419292_at   | Htra3                  | Htra serine peptidase 3                                                                                 | Cluster0020_Natural helper cell-related |
| 1427029_at   | Htra3                  | Htra serine peptidase 3                                                                                 | Cluster0020_Natural helper cell-related |
| 1420802_at   | Il13                   | interleukin 13                                                                                          | Cluster0020_Natural helper cell-related |
| 1449990_at   | Il2                    | interleukin 2                                                                                           | Cluster0020_Natural helper cell-related |
| 1450550_at   | Il5                    | interleukin 5                                                                                           | Cluster0020_Natural helper cell-related |
| 1418697_at   | Inmt                   | indolethylamine N-methyltransferase                                                                     | Cluster0020_Natural helper cell-related |
| 1459728_at   | Isy1                   | ISY1 splicing factor homolog (S. cerevisiae)                                                            | Cluster0020_Natural helper cell-related |
| 1417171_at   | Itk                    | IL2-inducible T-cell kinase                                                                             | Cluster0020_Natural helper cell-related |
| 1430833_at   | Itk                    | IL2-inducible T-cell kinase                                                                             | Cluster0020_Natural helper cell-related |
| 1456836_at   | Itk                    | IL2-inducible T-cell kinase                                                                             | Cluster0020_Natural helper cell-related |
| 1457120_at   | Itk                    | IL2-inducible T-cell kinase                                                                             | Cluster0020_Natural helper cell-related |
| 1444418_at   | Itpr2                  | Inositol 1,4,5-triphosphate receptor 2                                                                  | Cluster0020_Natural helper cell-related |
| 1451878_a_at | Jmy                    | junction-mediating and regulatory protein                                                               | Cluster0020_Natural helper cell-related |
| 1415899_at   | Junb                   | Jun-B oncogene                                                                                          | Cluster0020_Natural helper cell-related |
| 1417680_at   | Kcna5                  | potassium voltage-gated channel, shaker-related subfamily, member 5                                     | Cluster0020_Natural helper cell-related |
| 1420788_at   | Klrg1                  | killer cell lectin-like receptor subfamily G, member 1                                                  | Cluster0020_Natural helper cell-related |
| 1420401_a_at | LOC100046186 /// Ramp3 | similar to receptor activity modifying protein 3 /// receptor (calcitonin) activity modifying protein 3 | Cluster0020_Natural helper cell-related |
| 1420407_at   | Ltb4r1                 | leukotriene B4 receptor 1                                                                               | Cluster0020_Natural helper cell-related |
| 1453678_at   | Mbd1                   | methyl-CpG binding domain protein 1                                                                     | Cluster0020_Natural helper cell-related |
| 1420276_x_at | Mmrn2                  | multimerin 2                                                                                            | Cluster0020_Natural helper cell-related |
| 1437123_at   | Mmrn2                  | multimerin 2                                                                                            | Cluster0020_Natural helper cell-related |
| 1439518_at   | Mmrn2                  | multimerin 2                                                                                            | Cluster0020_Natural helper cell-related |
| 1456768_a_at | Mmrn2                  | multimerin 2                                                                                            | Cluster0020_Natural helper cell-related |
| 1420072_s_at | NA                     | ---                                                                                                     | Cluster0020_Natural helper cell-related |
| 1420277_at   | NA                     | ---                                                                                                     | Cluster0020_Natural helper cell-related |
| 1435701_at   | NA                     | ---                                                                                                     | Cluster0020_Natural helper cell-related |
| 1438960_at   | NA                     | ---                                                                                                     | Cluster0020_Natural helper cell-related |
| 1438997_at   | NA                     | ---                                                                                                     | Cluster0020_Natural helper cell-related |
| 1439165_at   | NA                     | ---                                                                                                     | Cluster0020_Natural helper cell-related |
| 1439651_at   | NA                     | ---                                                                                                     | Cluster0020_Natural helper cell-related |
| 1442822_at   | NA                     | ---                                                                                                     | Cluster0020_Natural helper cell-related |
| 1445265_at   | NA                     | ---                                                                                                     | Cluster0020_Natural helper cell-related |
| 1445517_at   | NA                     | ---                                                                                                     | Cluster0020_Natural helper cell-related |
| 1446249_at   | NA                     | ---                                                                                                     | Cluster0020_Natural helper cell-related |
| 1446346_at   | NA                     | ---                                                                                                     | Cluster0020_Natural helper cell-related |
| 1446969_at   | NA                     | ---                                                                                                     | Cluster0020_Natural helper cell-related |
| 1447116_at   | NA                     | ---                                                                                                     | Cluster0020_Natural helper cell-related |
| 1447286_at   | NA                     | ---                                                                                                     | Cluster0020_Natural helper cell-related |
| 1457839_at   | NA                     | ---                                                                                                     | Cluster0020_Natural helper cell-related |
| 1458083_at   | NA                     | ---                                                                                                     | Cluster0020_Natural helper cell-related |
| 1458141_at   | NA                     | ---                                                                                                     | Cluster0020_Natural helper cell-related |
| 1459242_at   | NA                     | ---                                                                                                     | Cluster0020_Natural helper cell-related |
| 1436074_at   | Nfkbid                 | nuclear factor of kappa light polypeptide gene enhancer in B-cells inhibitor, delta                     | Cluster0020_Natural helper cell-related |
| 1448728_a_at | Nfkbiz                 | nuclear factor of kappa light polypeptide gene enhancer in B-cells inhibitor, zeta                      | Cluster0020_Natural helper cell-related |
| 1447863_s_at | Nr4a2                  | nuclear receptor subfamily 4, group A, member 2                                                         | Cluster0020_Natural helper cell-related |

|              |               |                                                                            |                                         |
|--------------|---------------|----------------------------------------------------------------------------|-----------------------------------------|
| 1438796_at   | Nr4a3         | nuclear receptor subfamily 4, group A, member 3                            | Cluster0020_Natural helper cell-related |
| 1455679_at   | Obfc2a        | oligonucleotide/oligosaccharide-binding fold containing 2A                 | Cluster0020_Natural helper cell-related |
| 1449835_at   | Pdcd1         | programmed cell death 1                                                    | Cluster0020_Natural helper cell-related |
| 1427313_at   | Ptgir         | prostaglandin I receptor (IP)                                              | Cluster0020_Natural helper cell-related |
| 1452127_a_at | Ptpn13        | protein tyrosine phosphatase, non-receptor type 13                         | Cluster0020_Natural helper cell-related |
| 1427486_at   | Ptprb         | protein tyrosine phosphatase, receptor type, B                             | Cluster0020_Natural helper cell-related |
| 1436367_at   | Ptprb         | protein tyrosine phosphatase, receptor type, B                             | Cluster0020_Natural helper cell-related |
| 1420583_a_at | Rora          | RAR-related orphan receptor alpha                                          | Cluster0020_Natural helper cell-related |
| 1424034_at   | Rora          | RAR-related orphan receptor alpha                                          | Cluster0020_Natural helper cell-related |
| 1436325_at   | Rora          | RAR-related orphan receptor alpha                                          | Cluster0020_Natural helper cell-related |
| 1436326_at   | Rora          | RAR-related orphan receptor alpha                                          | Cluster0020_Natural helper cell-related |
| 1455165_at   | Rora          | RAR-related orphan receptor alpha                                          | Cluster0020_Natural helper cell-related |
| 1458129_at   | Rora          | RAR-related orphan receptor alpha                                          | Cluster0020_Natural helper cell-related |
| 1422562_at   | Rrad          | Ras-related associated with diabetes                                       | Cluster0020_Natural helper cell-related |
| 1444615_x_at | Runx1t1       | runt-related transcription factor 1; translocated to, 1 (cyclin D-related) | Cluster0020_Natural helper cell-related |
| 1440173_x_at | Selp          | selectin, platelet                                                         | Cluster0020_Natural helper cell-related |
| 1459601_at   | Sik1          | Salt inducible kinase 1                                                    | Cluster0020_Natural helper cell-related |
| 1424824_at   | Slain1        | SLAIN motif family, member 1                                               | Cluster0020_Natural helper cell-related |
| 1421657_a_at | Sox17         | SRY-box containing gene 17                                                 | Cluster0020_Natural helper cell-related |
| 1429177_x_at | Sox17         | SRY-box containing gene 17                                                 | Cluster0020_Natural helper cell-related |
| 1434885_at   | Spty2d1       | SPT2, Suppressor of Ty, domain containing 1 (S. cerevisiae)                | Cluster0020_Natural helper cell-related |
| 1455130_at   | Spty2d1       | SPT2, Suppressor of Ty, domain containing 1 (S. cerevisiae)                | Cluster0020_Natural helper cell-related |
| 1420447_at   | Sult1e1       | sulfotransferase family 1E, member 1                                       | Cluster0020_Natural helper cell-related |
| 1449816_at   | Sult5a1       | sulfotransferase family 5A, member 1                                       | Cluster0020_Natural helper cell-related |
| 1445310_at   | Sytl3         | synaptotagmin-like 3                                                       | Cluster0020_Natural helper cell-related |
| 1435302_at   | Taf4b         | TAF4B RNA polymerase II, TATA box binding protein (TBP)-associated factor  | Cluster0020_Natural helper cell-related |
| 1435303_at   | Taf4b         | TAF4B RNA polymerase II, TATA box binding protein (TBP)-associated factor  | Cluster0020_Natural helper cell-related |
| 1448976_at   | Tfip11        | tuftelin interacting protein 11                                            | Cluster0020_Natural helper cell-related |
| 1420064_s_at | Tkt1          | transketolase-like 1                                                       | Cluster0020_Natural helper cell-related |
| 1449567_at   | Tkt1          | transketolase-like 1                                                       | Cluster0020_Natural helper cell-related |
| 1436698_x_at | Tmem204       | transmembrane protein 204                                                  | Cluster0020_Natural helper cell-related |
| 1447915_x_at | Tmem204       | transmembrane protein 204                                                  | Cluster0020_Natural helper cell-related |
| 1431659_at   | Tmem86b       | transmembrane protein 86B                                                  | Cluster0020_Natural helper cell-related |
| 1422303_a_at | Tnfrsf18      | tumor necrosis factor receptor superfamily, member 18                      | Cluster0020_Natural helper cell-related |
| 1419083_at   | Tnfsf11       | tumor necrosis factor (ligand) superfamily, member 11                      | Cluster0020_Natural helper cell-related |
| 1448666_s_at | Tob2          | transducer of ERBB2, 2                                                     | Cluster0020_Natural helper cell-related |
| 1448667_x_at | Tob2          | transducer of ERBB2, 2                                                     | Cluster0020_Natural helper cell-related |
| 1436939_at   | Unc45b        | unc-45 homolog B (C. elegans)                                              | Cluster0020_Natural helper cell-related |
| 1457582_at   | Uty           | Ubiquitously transcribed tetratricopeptide repeat gene, Y chromosome       | Cluster0020_Natural helper cell-related |
| 1459565_at   | Uty           | ubiquitously transcribed tetratricopeptide repeat gene, Y chromosome       | Cluster0020_Natural helper cell-related |
| 1424380_at   | Vps37b        | vacuolar protein sorting 37B (yeast)                                       | Cluster0020_Natural helper cell-related |
| 1436068_at   | Zbtb10        | zinc finger and BTB domain containing 10                                   | Cluster0020_Natural helper cell-related |
| 1452877_at   | 2700029M09Rik | RIKEN cDNA 2700029M09 gene                                                 | Cluster0021_House keeping-cell cycle    |
| 1419153_at   | 2810417H13Rik | RIKEN cDNA 2810417H13 gene                                                 | Cluster0021_House keeping-cell cycle    |
| 1429734_at   | 4632434I11Rik | RIKEN cDNA 4632434I11 gene                                                 | Cluster0021_House keeping-cell cycle    |
| 1431358_at   | 4930547N16Rik | RIKEN cDNA 4930547N16 gene                                                 | Cluster0021_House keeping-cell cycle    |
| 1435773_at   | 4930547N16Rik | RIKEN cDNA 4930547N16 gene                                                 | Cluster0021_House keeping-cell cycle    |
| 1423714_at   | Asf1b         | ASF1 anti-silencing function 1 homolog B (S. cerevisiae)                   | Cluster0021_House keeping-cell cycle    |
| 1422814_at   | Aspm          | asp (abnormal spindle)-like, microcephaly associated (Drosophila)          | Cluster0021_House keeping-cell cycle    |
| 1441520_at   | Aspm          | asp (abnormal spindle)-like, microcephaly associated (Drosophila)          | Cluster0021_House keeping-cell cycle    |
| 1458560_at   | Aspm          | asp (abnormal spindle)-like, microcephaly associated (Drosophila)          | Cluster0021_House keeping-cell cycle    |
| 1458873_at   | Aspm          | asp (abnormal spindle)-like, microcephaly associated (Drosophila)          | Cluster0021_House keeping-cell cycle    |
| 1436174_at   | Atad2         | ATPase family, AAA domain containing 2                                     | Cluster0021_House keeping-cell cycle    |
| 1443229_at   | Atad2         | ATPase family, AAA domain containing 2                                     | Cluster0021_House keeping-cell cycle    |
| 1424511_at   | Aurka         | aurora kinase A                                                            | Cluster0021_House keeping-cell cycle    |
| 1424128_x_at | Aurkb         | aurora kinase B                                                            | Cluster0021_House keeping-cell cycle    |
| 1451246_s_at | Aurkb         | aurora kinase B                                                            | Cluster0021_House keeping-cell cycle    |

|              |                                        |                                                                                                             |                                      |
|--------------|----------------------------------------|-------------------------------------------------------------------------------------------------------------|--------------------------------------|
| 1424278_a_at | Birc5                                  | baculoviral IAP repeat-containing 5                                                                         | Cluster0021_House keeping-cell cycle |
| 1424630_a_at | Brca1                                  | breast cancer 1                                                                                             | Cluster0021_House keeping-cell cycle |
| 1451417_at   | Brca1                                  | breast cancer 1                                                                                             | Cluster0021_House keeping-cell cycle |
| 1424046_at   | Bub1                                   | budding uninhibited by benzimidazoles 1 homolog (S. cerevisiae)                                             | Cluster0021_House keeping-cell cycle |
| 1417910_at   | Ccna2                                  | cyclin A2                                                                                                   | Cluster0021_House keeping-cell cycle |
| 1417911_at   | Ccna2                                  | cyclin A2                                                                                                   | Cluster0021_House keeping-cell cycle |
| 1419943_s_at | Ccnb1                                  | cyclin B1                                                                                                   | Cluster0021_House keeping-cell cycle |
| 1448205_at   | Ccnb1                                  | cyclin B1                                                                                                   | Cluster0021_House keeping-cell cycle |
| 1449675_at   | Ccnb1 /// Gm4870 /// Gm5593 /// Gm8416 | cyclin B1 /// predicted gene 4870 /// predicted gene 5593 /// predicted gene 8416 /// similar to major urin | Cluster0021_House keeping-cell cycle |
| 1416076_at   | Ccnb1 /// Gm5593 /// Gm8416            | cyclin B1 /// predicted gene 5593 /// predicted gene 8416                                                   | Cluster0021_House keeping-cell cycle |
| 1450920_at   | Ccnb2                                  | cyclin B2                                                                                                   | Cluster0021_House keeping-cell cycle |
| 1422513_at   | Ccnf                                   | cyclin F                                                                                                    | Cluster0021_House keeping-cell cycle |
| 1416664_at   | Cdc20                                  | cell division cycle 20 homolog (S. cerevisiae)                                                              | Cluster0021_House keeping-cell cycle |
| 1422252_a_at | Cdc25c                                 | cell division cycle 25 homolog C (S. pombe)                                                                 | Cluster0021_House keeping-cell cycle |
| 1456077_x_at | Cdc25c                                 | cell division cycle 25 homolog C (S. pombe)                                                                 | Cluster0021_House keeping-cell cycle |
| 1416575_at   | Cdc45                                  | cell division cycle 45 homolog (S. cerevisiae)                                                              | Cluster0021_House keeping-cell cycle |
| 1437251_at   | Cdca2                                  | cell division cycle associated 2                                                                            | Cluster0021_House keeping-cell cycle |
| 1452040_a_at | Cdca3                                  | cell division cycle associated 3                                                                            | Cluster0021_House keeping-cell cycle |
| 1428480_at   | Cdca8                                  | cell division cycle associated 8                                                                            | Cluster0021_House keeping-cell cycle |
| 1450842_a_at | Cenpa                                  | centromere protein A                                                                                        | Cluster0021_House keeping-cell cycle |
| 1435005_at   | Cenpe                                  | centromere protein E                                                                                        | Cluster0021_House keeping-cell cycle |
| 1427161_at   | Cenpf                                  | centromere protein F                                                                                        | Cluster0021_House keeping-cell cycle |
| 1422016_a_at | Cenph                                  | centromere protein H                                                                                        | Cluster0021_House keeping-cell cycle |
| 1436723_at   | Cenpi                                  | centromere protein I                                                                                        | Cluster0021_House keeping-cell cycle |
| 1427105_at   | Cenpn                                  | centromere protein N                                                                                        | Cluster0021_House keeping-cell cycle |
| 1452305_s_at | Cenpn                                  | centromere protein N                                                                                        | Cluster0021_House keeping-cell cycle |
| 1432361_a_at | Cenpp                                  | centromere protein P                                                                                        | Cluster0021_House keeping-cell cycle |
| 1452242_at   | Cep55                                  | centrosomal protein 55                                                                                      | Cluster0021_House keeping-cell cycle |
| 1453769_at   | Ckap2l                                 | cytoskeleton associated protein 2-like                                                                      | Cluster0021_House keeping-cell cycle |
| 1416698_a_at | Cks1b                                  | CDC28 protein kinase 1b                                                                                     | Cluster0021_House keeping-cell cycle |
| 1417458_s_at | Cks2                                   | CDC28 protein kinase regulatory subunit 2                                                                   | Cluster0021_House keeping-cell cycle |
| 1441984_at   | Clspn                                  | claspin homolog (Xenopus laevis)                                                                            | Cluster0021_House keeping-cell cycle |
| 1456280_at   | Clspn                                  | claspin homolog (Xenopus laevis)                                                                            | Cluster0021_House keeping-cell cycle |
| 1420081_s_at | D2Ert750e                              | DNA segment, Chr 2, ERATO Doi 750, expressed                                                                | Cluster0021_House keeping-cell cycle |
| 1423463_a_at | D2Ert750e                              | DNA segment, Chr 2, ERATO Doi 750, expressed                                                                | Cluster0021_House keeping-cell cycle |
| 1418334_at   | Dbf4                                   | DBF4 homolog (S. cerevisiae)                                                                                | Cluster0021_House keeping-cell cycle |
| 1424292_at   | Depdc1a                                | DEP domain containing 1a                                                                                    | Cluster0021_House keeping-cell cycle |
| 1422944_a_at | Diap3                                  | diaphanous homolog 3 (Drosophila)                                                                           | Cluster0021_House keeping-cell cycle |
| 1438811_at   | Dlgap5                                 | discs, large (Drosophila) homolog-associated protein 5                                                      | Cluster0021_House keeping-cell cycle |
| 1455730_at   | Dlgap5                                 | discs, large (Drosophila) homolog-associated protein 5                                                      | Cluster0021_House keeping-cell cycle |
| 1443864_at   | Dtl                                    | denticleless homolog (Drosophila)                                                                           | Cluster0021_House keeping-cell cycle |
| 1437187_at   | E2f7                                   | E2F transcription factor 7                                                                                  | Cluster0021_House keeping-cell cycle |
| 1433862_at   | Esp1                                   | extra spindle poles-like 1 (S. cerevisiae)                                                                  | Cluster0021_House keeping-cell cycle |
| 1418027_at   | Exo1                                   | exonuclease 1                                                                                               | Cluster0021_House keeping-cell cycle |
| 1454744_at   | F630043A04Rik                          | RIKEN cDNA F630043A04 gene                                                                                  | Cluster0021_House keeping-cell cycle |
| 1423440_at   | Fam33a                                 | family with sequence similarity 33, member A                                                                | Cluster0021_House keeping-cell cycle |
| 1452924_at   | Fam83d                                 | family with sequence similarity 83, member D                                                                | Cluster0021_House keeping-cell cycle |
| 1439091_at   | Fancd2                                 | Fanconi anemia, complementation group D2                                                                    | Cluster0021_House keeping-cell cycle |
| 1425941_a_at | Fanci                                  | Fanconi anemia, complementation group I                                                                     | Cluster0021_House keeping-cell cycle |
| 1429499_at   | Fbxo5                                  | F-box protein 5                                                                                             | Cluster0021_House keeping-cell cycle |
| 1453050_at   | Gins3                                  | GINS complex subunit 3 (Psf3 homolog)                                                                       | Cluster0021_House keeping-cell cycle |
| 1438009_at   | Gm11276 /// Hist1h2ad /// Hist1h2ao    | predicted gene 11276 /// histone cluster 1, H2ad /// histone cluster 1, H2ao                                | Cluster0021_House keeping-cell cycle |
| 1427541_x_at | Hmnr                                   | hyaluronan mediated motility receptor (RHAMM)                                                               | Cluster0021_House keeping-cell cycle |
| 1429871_at   | Hmnr                                   | hyaluronan mediated motility receptor (RHAMM)                                                               | Cluster0021_House keeping-cell cycle |
| 1450156_a_at | Hmnr                                   | hyaluronan mediated motility receptor (RHAMM)                                                               | Cluster0021_House keeping-cell cycle |
| 1450157_a_at | Hmnr                                   | hyaluronan mediated motility receptor (RHAMM)                                                               | Cluster0021_House keeping-cell cycle |
| 1423092_at   | Incnp                                  | inner centromere protein                                                                                    | Cluster0021_House keeping-cell cycle |

|              |                        |                                                                                                              |                                      |
|--------------|------------------------|--------------------------------------------------------------------------------------------------------------|--------------------------------------|
| 1435306_a_at | Kif11                  | kinesin family member 11                                                                                     | Cluster0021_House keeping-cell cycle |
| 1452314_at   | Kif11                  | kinesin family member 11                                                                                     | Cluster0021_House keeping-cell cycle |
| 1452315_at   | Kif11                  | kinesin family member 11                                                                                     | Cluster0021_House keeping-cell cycle |
| 1424107_at   | Kif18a                 | kinesin family member 18A                                                                                    | Cluster0021_House keeping-cell cycle |
| 1453226_at   | Kif18b                 | kinesin family member 18B                                                                                    | Cluster0021_House keeping-cell cycle |
| 1449207_a_at | Kif20a                 | kinesin family member 20A                                                                                    | Cluster0021_House keeping-cell cycle |
| 1439695_a_at | Kif20b                 | kinesin family member 20B                                                                                    | Cluster0021_House keeping-cell cycle |
| 1440924_at   | Kif20b                 | kinesin family member 20B                                                                                    | Cluster0021_House keeping-cell cycle |
| 1423813_at   | Kif22                  | kinesin family member 22                                                                                     | Cluster0021_House keeping-cell cycle |
| 1451128_s_at | Kif22                  | kinesin family member 22                                                                                     | Cluster0021_House keeping-cell cycle |
| 1454221_a_at | Kif2c                  | kinesin family member 2C                                                                                     | Cluster0021_House keeping-cell cycle |
| 1449060_at   | Kif2c /// LOC631653    | kinesin family member 2C /// similar to Kinesin-like protein KIF2C (Mitotic centromere-associated kinesin) ( | Cluster0021_House keeping-cell cycle |
| 1450692_at   | Kif4                   | kinesin family member 4                                                                                      | Cluster0021_House keeping-cell cycle |
| 1449877_s_at | Kifc1 /// LOC100044746 | kinesin family member C1 /// similar to Kifc1 protein                                                        | Cluster0021_House keeping-cell cycle |
| 1435575_at   | Kntc1                  | kinetochore associated 1                                                                                     | Cluster0021_House keeping-cell cycle |
| 1415860_at   | Kpna2                  | karyopherin (importin) alpha 2                                                                               | Cluster0021_House keeping-cell cycle |
| 1423520_at   | Lmnb1                  | lamin B1                                                                                                     | Cluster0021_House keeping-cell cycle |
| 1423521_at   | Lmnb1                  | lamin B1                                                                                                     | Cluster0021_House keeping-cell cycle |
| 1426653_at   | LOC100045677 /// Mcm3  | similar to DNA replication licensing factor MCM3 (DNA polymerase alpha holoenzyme-associated protein P       | Cluster0021_House keeping-cell cycle |
| 1422460_at   | Mad21                  | MAD2 mitotic arrest deficient-like 1 (yeast)                                                                 | Cluster0021_House keeping-cell cycle |
| 1416214_at   | Mcm4                   | minichromosome maintenance deficient 4 homolog (S. cerevisiae)                                               | Cluster0021_House keeping-cell cycle |
| 1415945_at   | Mcm5                   | minichromosome maintenance deficient 5, cell division cycle 46 (S. cerevisiae)                               | Cluster0021_House keeping-cell cycle |
| 1416030_a_at | Mcm7                   | minichromosome maintenance deficient 7 (S. cerevisiae)                                                       | Cluster0021_House keeping-cell cycle |
| 1416558_at   | Melk                   | maternal embryonic leucine zipper kinase                                                                     | Cluster0021_House keeping-cell cycle |
| 1434426_at   | Ncapd3                 | non-SMC condensin II complex, subunit D3                                                                     | Cluster0021_House keeping-cell cycle |
| 1429171_a_at | Ncapg                  | non-SMC condensin I complex, subunit G                                                                       | Cluster0021_House keeping-cell cycle |
| 1417926_at   | Ncapg2                 | non-SMC condensin II complex, subunit G2                                                                     | Cluster0021_House keeping-cell cycle |
| 1423920_at   | Ncaph                  | non-SMC condensin I complex, subunit H                                                                       | Cluster0021_House keeping-cell cycle |
| 1417445_at   | Ndc80                  | NDC80 homolog, kinetochore complex component (S. cerevisiae)                                                 | Cluster0021_House keeping-cell cycle |
| 1437580_s_at | Nek2                   | NIMA (never in mitosis gene a)-related expressed kinase 2                                                    | Cluster0021_House keeping-cell cycle |
| 1430811_a_at | Nuf2                   | NUF2, NDC80 kinetochore complex component, homolog (S. cerevisiae)                                           | Cluster0021_House keeping-cell cycle |
| 1430617_at   | Oip5                   | Opa interacting protein 5                                                                                    | Cluster0021_House keeping-cell cycle |
| 1448191_at   | Plk1                   | polo-like kinase 1 (Drosophila)                                                                              | Cluster0021_House keeping-cell cycle |
| 1419838_s_at | Plk4                   | polo-like kinase 4 (Drosophila)                                                                              | Cluster0021_House keeping-cell cycle |
| 1426580_at   | Plk4                   | polo-like kinase 4 (Drosophila)                                                                              | Cluster0021_House keeping-cell cycle |
| 1452115_a_at | Plk4                   | polo-like kinase 4 (Drosophila)                                                                              | Cluster0021_House keeping-cell cycle |
| 1432202_a_at | Poc1a                  | POC1 centriolar protein homolog A (Chlamydomonas)                                                            | Cluster0021_House keeping-cell cycle |
| 1428892_at   | Ppil1                  | peptidylprolyl isomerase (cyclophilin)-like 1                                                                | Cluster0021_House keeping-cell cycle |
| 1423774_a_at | Prc1                   | protein regulator of cytokinesis 1                                                                           | Cluster0021_House keeping-cell cycle |
| 1423775_s_at | Prc1                   | protein regulator of cytokinesis 1                                                                           | Cluster0021_House keeping-cell cycle |
| 1417940_s_at | Rad51ap1               | RAD51 associated protein 1                                                                                   | Cluster0021_House keeping-cell cycle |
| 1416962_at   | Rcc1                   | regulator of chromosome condensation 1                                                                       | Cluster0021_House keeping-cell cycle |
| 1454011_a_at | Rpa2                   | replication protein A2                                                                                       | Cluster0021_House keeping-cell cycle |
| 1415878_at   | Rrm1                   | ribonucleotide reductase M1                                                                                  | Cluster0021_House keeping-cell cycle |
| 1448127_at   | Rrm1                   | ribonucleotide reductase M1                                                                                  | Cluster0021_House keeping-cell cycle |
| 1418919_at   | Sgo1                   | shugoshin-like 1 (S. pombe)                                                                                  | Cluster0021_House keeping-cell cycle |
| 1437370_at   | Sgo2                   | shugoshin-like 2 (S. pombe)                                                                                  | Cluster0021_House keeping-cell cycle |
| 1416299_at   | Shcbp1                 | Shc SH2-domain binding protein 1                                                                             | Cluster0021_House keeping-cell cycle |
| 1432179_x_at | Ska1                   | spindle and kinetochore associated complex subunit 1                                                         | Cluster0021_House keeping-cell cycle |
| 1450496_a_at | Ska1                   | spindle and kinetochore associated complex subunit 1                                                         | Cluster0021_House keeping-cell cycle |
| 1429659_at   | Smc2                   | structural maintenance of chromosomes 2                                                                      | Cluster0021_House keeping-cell cycle |
| 1448635_at   | Smc2                   | structural maintenance of chromosomes 2                                                                      | Cluster0021_House keeping-cell cycle |
| 1427498_a_at | Spag5                  | sperm associated antigen 5                                                                                   | Cluster0021_House keeping-cell cycle |
| 1433892_at   | Spag5                  | sperm associated antigen 5                                                                                   | Cluster0021_House keeping-cell cycle |
| 1433893_s_at | Spag5                  | sperm associated antigen 5                                                                                   | Cluster0021_House keeping-cell cycle |
| 1427707_a_at | Stil                   | Scf/Tal1 interrupting locus                                                                                  | Cluster0021_House keeping-cell cycle |
| 1427382_a_at | Suv39h1                | suppressor of variegation 3-9 homolog 1 (Drosophila)                                                         | Cluster0021_House keeping-cell cycle |

|              |                                     |                                                                                                                                  |                                      |
|--------------|-------------------------------------|----------------------------------------------------------------------------------------------------------------------------------|--------------------------------------|
| 1432236_a_at | Suv39h1                             | suppressor of variegation 3-9 homolog 1 (Drosophila)                                                                             | Cluster0021_House keeping-cell cycle |
| 1417450_a_at | Tacc3                               | transforming, acidic coiled-coil containing protein 3                                                                            | Cluster0021_House keeping-cell cycle |
| 1423241_a_at | Tfdp1                               | transcription factor Dp 1                                                                                                        | Cluster0021_House keeping-cell cycle |
| 1426612_at   | Tipin                               | timeless interacting protein                                                                                                     | Cluster0021_House keeping-cell cycle |
| 1416258_at   | Tk1                                 | thymidine kinase 1                                                                                                               | Cluster0021_House keeping-cell cycle |
| 1442454_at   | Top2a                               | topoisomerase (DNA) II alpha                                                                                                     | Cluster0021_House keeping-cell cycle |
| 1454694_a_at | Top2a                               | topoisomerase (DNA) II alpha                                                                                                     | Cluster0021_House keeping-cell cycle |
| 1428104_at   | Tpx2                                | TPX2, microtubule-associated protein homolog (Xenopus laevis)                                                                    | Cluster0021_House keeping-cell cycle |
| 1428105_at   | Tpx2                                | TPX2, microtubule-associated protein homolog (Xenopus laevis)                                                                    | Cluster0021_House keeping-cell cycle |
| 1420707_a_at | Traip                               | TRAF-interacting protein                                                                                                         | Cluster0021_House keeping-cell cycle |
| 1449171_at   | Ttk                                 | Ttk protein kinase                                                                                                               | Cluster0021_House keeping-cell cycle |
| 1424991_s_at | Tyms /// Tyms-ps                    | thymidylate synthase /// thymidylate synthase, pseudogene                                                                        | Cluster0021_House keeping-cell cycle |
| 1452954_at   | Ube2c                               | ubiquitin-conjugating enzyme E2C                                                                                                 | Cluster0021_House keeping-cell cycle |
| 1415810_at   | Uhrf1                               | ubiquitin-like, containing PHD and RING finger domains, 1                                                                        | Cluster0021_House keeping-cell cycle |
| 1415811_at   | Uhrf1                               | ubiquitin-like, containing PHD and RING finger domains, 1                                                                        | Cluster0021_House keeping-cell cycle |
| 1423674_at   | Usp1                                | ubiquitin specific peptidase 1                                                                                                   | Cluster0021_House keeping-cell cycle |
| 1416757_at   | Zwilch                              | Zwilch, kinetochore associated, homolog (Drosophila)                                                                             | Cluster0021_House keeping-cell cycle |
| 1428243_at   | 1700021K19Rik                       | RIKEN cDNA 1700021K19 gene                                                                                                       | Cluster0022_B cell-related           |
| 1428947_at   | 2010001M09Rik                       | RIKEN cDNA 2010001M09 gene                                                                                                       | Cluster0022_B cell-related           |
| 1430479_at   | 2010007H06Rik                       | RIKEN cDNA 2010007H06 gene                                                                                                       | Cluster0022_B cell-related           |
| 1428719_at   | 2010309G21Rik /// Igl-C2            | RIKEN cDNA 2010309G21 gene /// immunoglobulin lambda chain, constant region 2                                                    | Cluster0022_B cell-related           |
| 1428720_s_at | 2010309G21Rik /// Igl-C2 /// Igl-C3 | RIKEN cDNA 2010309G21 gene /// immunoglobulin lambda chain, constant region 2 /// immunoglobulin lambda chain, constant region 3 | Cluster0022_B cell-related           |
| 1440845_at   | 4930420K17Rik                       | RIKEN cDNA 4930420K17 gene                                                                                                       | Cluster0022_B cell-related           |
| 1432153_at   | 4933426B08Rik                       | RIKEN cDNA 4933426B08 gene                                                                                                       | Cluster0022_B cell-related           |
| 1432978_at   | 9030607L02Rik                       | RIKEN cDNA 9030607L02 gene                                                                                                       | Cluster0022_B cell-related           |
| 1442023_at   | A530030E21Rik                       | RIKEN cDNA A530030E21 gene                                                                                                       | Cluster0022_B cell-related           |
| 1442266_at   | Al662175                            | expressed sequence Al662175                                                                                                      | Cluster0022_B cell-related           |
| 1446396_at   | Angptl1                             | Angiopoietin-like 1                                                                                                              | Cluster0022_B cell-related           |
| 1417470_at   | Apobec3                             | apolipoprotein B mRNA editing enzyme, catalytic polypeptide 3                                                                    | Cluster0022_B cell-related           |
| 1417440_at   | Arid1a                              | AT rich interactive domain 1A (SWI-like)                                                                                         | Cluster0022_B cell-related           |
| 1423526_at   | Arid3b                              | AT rich interactive domain 3B (BRIGHT-like)                                                                                      | Cluster0022_B cell-related           |
| 1452044_at   | Arpc5l                              | actin related protein 2/3 complex, subunit 5-like                                                                                | Cluster0022_B cell-related           |
| 1430450_at   | Atp5sl                              | ATP5S-like                                                                                                                       | Cluster0022_B cell-related           |
| 1458551_at   | AY512938                            | cDNA sequence AY512938                                                                                                           | Cluster0022_B cell-related           |
| 1456328_at   | Bank1                               | B-cell scaffold protein with ankyrin repeats 1                                                                                   | Cluster0022_B cell-related           |
| 1447334_at   | Bcl11a                              | B-cell CLL/lymphoma 11A (zinc finger protein)                                                                                    | Cluster0022_B cell-related           |
| 1435351_at   | Bend5                               | BEN domain containing 5                                                                                                          | Cluster0022_B cell-related           |
| 1422775_at   | Blk                                 | B lymphoid kinase                                                                                                                | Cluster0022_B cell-related           |
| 1455656_at   | Btla                                | B and T lymphocyte associated                                                                                                    | Cluster0022_B cell-related           |
| 1444107_at   | C130039O16Rik                       | RIKEN cDNA C130039O16 gene                                                                                                       | Cluster0022_B cell-related           |
| 1450357_a_at | Ccr6                                | chemokine (C-C motif) receptor 6                                                                                                 | Cluster0022_B cell-related           |
| 1450570_a_at | Cd19                                | CD19 antigen                                                                                                                     | Cluster0022_B cell-related           |
| 1419768_at   | Cd22                                | CD22 antigen                                                                                                                     | Cluster0022_B cell-related           |
| 1419769_at   | Cd22                                | CD22 antigen                                                                                                                     | Cluster0022_B cell-related           |
| 1419206_at   | Cd37                                | CD37 antigen                                                                                                                     | Cluster0022_B cell-related           |
| 1425736_at   | Cd37                                | CD37 antigen                                                                                                                     | Cluster0022_B cell-related           |
| 1418830_at   | Cd79a /// LOC100047815              | CD79A antigen (immunoglobulin-associated alpha) /// similar to CD79A antigen (immunoglobulin-associated alpha)                   | Cluster0022_B cell-related           |
| 1417640_at   | Cd79b                               | CD79B antigen                                                                                                                    | Cluster0022_B cell-related           |
| 1421210_at   | Ciita                               | class II transactivator                                                                                                          | Cluster0022_B cell-related           |
| 1421211_a_at | Ciita                               | class II transactivator                                                                                                          | Cluster0022_B cell-related           |
| 1428043_a_at | Cmah                                | cytidine monophospho-N-acetylneuraminic acid hydroxylase                                                                         | Cluster0022_B cell-related           |
| 1435288_at   | Coro1a                              | coronin, actin binding protein 1A                                                                                                | Cluster0022_B cell-related           |
| 1425289_a_at | Cr2                                 | complement receptor 2                                                                                                            | Cluster0022_B cell-related           |
| 1449838_at   | Crisp3                              | cysteine-rich secretory protein 3                                                                                                | Cluster0022_B cell-related           |
| 1422003_at   | Cxcr5                               | chemokine (C-X-C motif) receptor 5                                                                                               | Cluster0022_B cell-related           |
| 1419219_at   | Cyp4f18 /// LOC100044439            | cytochrome P450, family 4, subfamily f, polypeptide 18 /// similar to cytochrome P450 CYP4F18                                    | Cluster0022_B cell-related           |
| 1429889_at   | Faim3                               | Fas apoptotic inhibitory molecule 3                                                                                              | Cluster0022_B cell-related           |

|              |                                        |                                                                                                            |                            |
|--------------|----------------------------------------|------------------------------------------------------------------------------------------------------------|----------------------------|
| 1459140_at   | Fam172a                                | family with sequence similarity 172, member A                                                              | Cluster0022_B cell-related |
| 1422122_at   | Fcer2a                                 | Fc receptor, IgE, low affinity II, alpha polypeptide                                                       | Cluster0022_B cell-related |
| 1451713_a_at | Fcer2a                                 | Fc receptor, IgE, low affinity II, alpha polypeptide                                                       | Cluster0022_B cell-related |
| 1434260_at   | Fchsd2                                 | FCH and double SH3 domains 2                                                                               | Cluster0022_B cell-related |
| 1425062_at   | Fcrl1                                  | Fc receptor-like 1                                                                                         | Cluster0022_B cell-related |
| 1425802_a_at | Fcrla                                  | Fc receptor-like A                                                                                         | Cluster0022_B cell-related |
| 1443258_at   | Foxp1                                  | forkhead box P1                                                                                            | Cluster0022_B cell-related |
| 1459564_at   | Gm4670                                 | predicted gene 4670                                                                                        | Cluster0022_B cell-related |
| 1442219_at   | Gm8369                                 | predicted gene 8369                                                                                        | Cluster0022_B cell-related |
| 1429387_at   | Grap                                   | GRB2-related adaptor protein                                                                               | Cluster0022_B cell-related |
| 1429782_at   | Grccl0                                 | gene rich cluster, C10 gene                                                                                | Cluster0022_B cell-related |
| 1450480_a_at | Grk6                                   | G protein-coupled receptor kinase 6                                                                        | Cluster0022_B cell-related |
| 1419744_at   | H2-DMb2                                | histocompatibility 2, class II, locus Mb2                                                                  | Cluster0022_B cell-related |
| 1443686_at   | H2-DMb2                                | histocompatibility 2, class II, locus Mb2                                                                  | Cluster0022_B cell-related |
| 1443687_x_at | H2-DMb2                                | histocompatibility 2, class II, locus Mb2                                                                  | Cluster0022_B cell-related |
| 1419297_at   | H2-Oa                                  | histocompatibility 2, O region alpha locus                                                                 | Cluster0022_B cell-related |
| 1422201_at   | H2-Ob                                  | histocompatibility 2, O region beta locus                                                                  | Cluster0022_B cell-related |
| 1440837_at   | H2-Ob                                  | histocompatibility 2, O region beta locus                                                                  | Cluster0022_B cell-related |
| 1432492_a_at | Haa0                                   | 3-hydroxyanthranilate 3,4-dioxygenase                                                                      | Cluster0022_B cell-related |
| 1454775_at   | Hdac10                                 | histone deacetylase 10                                                                                     | Cluster0022_B cell-related |
| 1419212_at   | Icosl                                  | icos ligand                                                                                                | Cluster0022_B cell-related |
| 1455530_at   | Ighv14-2                               | immunoglobulin heavy variable V14-2                                                                        | Cluster0022_B cell-related |
| 1425871_a_at | Igk-V28 /// Ikgv12-46 /// LOC100046973 | immunoglobulin kappa chain variable 28 (V28) /// immunoglobulin kappa chain variable 12-46 /// similar to  | Cluster0022_B cell-related |
| 1427292_at   | Igl-V1                                 | immunoglobulin lambda chain, variable 1                                                                    | Cluster0022_B cell-related |
| 1447918_x_at | Igl-V1                                 | Immunoglobulin lambda chain, variable 1                                                                    | Cluster0022_B cell-related |
| 1441088_at   | Ikzf3                                  | IKAROS family zinc finger 3                                                                                | Cluster0022_B cell-related |
| 1450456_at   | Il21r                                  | interleukin 21 receptor                                                                                    | Cluster0022_B cell-related |
| 1438721_a_at | Irf3                                   | interferon regulatory factor 3                                                                             | Cluster0022_B cell-related |
| 1421173_at   | Irf4                                   | interferon regulatory factor 4                                                                             | Cluster0022_B cell-related |
| 1431772_a_at | Itns2                                  | intersectin 2                                                                                              | Cluster0022_B cell-related |
| 1446595_at   | Itns2                                  | intersectin 2                                                                                              | Cluster0022_B cell-related |
| 1438687_at   | Lax1                                   | lymphocyte transmembrane adaptor 1                                                                         | Cluster0022_B cell-related |
| 1427757_at   | LOC100047222 /// LOC676193             | similar to anti-glycoprotein-B of human Cytomegalovirus immunoglobulin VI chain /// similar to Ig kappa ch | Cluster0022_B cell-related |
| 1431394_a_at | Lrrk2                                  | leucine-rich repeat kinase 2                                                                               | Cluster0022_B cell-related |
| 1416930_at   | Ly6d                                   | lymphocyte antigen 6 complex, locus D                                                                      | Cluster0022_B cell-related |
| 1439773_at   | Ly6e                                   | lymphocyte antigen 6 complex, locus E                                                                      | Cluster0022_B cell-related |
| 1439323_a_at | Map4k1                                 | mitogen-activated protein kinase kinase kinase kinase 1                                                    | Cluster0022_B cell-related |
| 1428297_at   | Map4k2                                 | mitogen-activated protein kinase kinase kinase kinase 2                                                    | Cluster0022_B cell-related |
| 1434833_at   | Map4k2                                 | mitogen-activated protein kinase kinase kinase kinase 2                                                    | Cluster0022_B cell-related |
| 1450244_a_at | Map4k2                                 | mitogen-activated protein kinase kinase kinase kinase 2                                                    | Cluster0022_B cell-related |
| 1421027_a_at | Mef2c                                  | myocyte enhancer factor 2C                                                                                 | Cluster0022_B cell-related |
| 1421028_a_at | Mef2c                                  | myocyte enhancer factor 2C                                                                                 | Cluster0022_B cell-related |
| 1451506_at   | Mef2c                                  | myocyte enhancer factor 2C                                                                                 | Cluster0022_B cell-related |
| 1451507_at   | Mef2c                                  | myocyte enhancer factor 2C                                                                                 | Cluster0022_B cell-related |
| 1451523_a_at | Mif4gd                                 | MIF4G domain containing                                                                                    | Cluster0022_B cell-related |
| 1423226_at   | Ms4a1                                  | membrane-spanning 4-domains, subfamily A, member 1                                                         | Cluster0022_B cell-related |
| 1450912_at   | Ms4a1                                  | membrane-spanning 4-domains, subfamily A, member 1                                                         | Cluster0022_B cell-related |
| 1421598_at   | NA                                     | ---                                                                                                        | Cluster0022_B cell-related |
| 1439946_at   | NA                                     | ---                                                                                                        | Cluster0022_B cell-related |
| 1440051_at   | NA                                     | ---                                                                                                        | Cluster0022_B cell-related |
| 1440196_at   | NA                                     | ---                                                                                                        | Cluster0022_B cell-related |
| 1440494_at   | NA                                     | ---                                                                                                        | Cluster0022_B cell-related |
| 1441126_at   | NA                                     | ---                                                                                                        | Cluster0022_B cell-related |
| 1442074_at   | NA                                     | ---                                                                                                        | Cluster0022_B cell-related |
| 1442254_at   | NA                                     | ---                                                                                                        | Cluster0022_B cell-related |
| 1443115_at   | NA                                     | ---                                                                                                        | Cluster0022_B cell-related |
| 1444100_at   | NA                                     | ---                                                                                                        | Cluster0022_B cell-related |



|              |               |                                                                                              |                               |
|--------------|---------------|----------------------------------------------------------------------------------------------|-------------------------------|
| 1444260_at   | NA            | ---                                                                                          | Cluster0022_B cell-related    |
| 1444375_at   | NA            | ---                                                                                          | Cluster0022_B cell-related    |
| 1445222_at   | NA            | ---                                                                                          | Cluster0022_B cell-related    |
| 1445420_at   | NA            | ---                                                                                          | Cluster0022_B cell-related    |
| 1445716_at   | NA            | ---                                                                                          | Cluster0022_B cell-related    |
| 1446414_at   | NA            | ---                                                                                          | Cluster0022_B cell-related    |
| 1446484_at   | NA            | ---                                                                                          | Cluster0022_B cell-related    |
| 1446489_at   | NA            | ---                                                                                          | Cluster0022_B cell-related    |
| 1446669_at   | NA            | ---                                                                                          | Cluster0022_B cell-related    |
| 1452426_x_at | NA            | ---                                                                                          | Cluster0022_B cell-related    |
| 1456274_at   | NA            | ---                                                                                          | Cluster0022_B cell-related    |
| 1457995_at   | NA            | ---                                                                                          | Cluster0022_B cell-related    |
| 1458978_at   | NA            | ---                                                                                          | Cluster0022_B cell-related    |
| 1459136_at   | NA            | ---                                                                                          | Cluster0022_B cell-related    |
| 1459916_at   | NA            | ---                                                                                          | Cluster0022_B cell-related    |
| 1423590_at   | Napsa         | napsin A aspartic peptidase                                                                  | Cluster0022_B cell-related    |
| 1430744_at   | Napsa         | napsin A aspartic peptidase                                                                  | Cluster0022_B cell-related    |
| 1421765_at   | Pax5          | paired box gene 5                                                                            | Cluster0022_B cell-related    |
| 1436177_at   | Plekha2       | pleckstrin homology domain-containing, family A (phosphoinositide binding specific) member 2 | Cluster0022_B cell-related    |
| 1459137_at   | Pml           | promyelocytic leukemia                                                                       | Cluster0022_B cell-related    |
| 1416957_at   | Pou2af1       | POU domain, class 2, associating factor 1                                                    | Cluster0022_B cell-related    |
| 1418181_at   | Ptp4a3        | protein tyrosine phosphatase 4a3                                                             | Cluster0022_B cell-related    |
| 1425602_a_at | Rabep2        | rabaptin, RAB GTPase binding effector protein 2                                              | Cluster0022_B cell-related    |
| 1453365_at   | Rabgap1       | RAB GTPase activating protein 1-like                                                         | Cluster0022_B cell-related    |
| 1417230_at   | Ralgs2        | Ral GEF with PH domain and SH3 binding motif 2                                               | Cluster0022_B cell-related    |
| 1428392_at   | Rassf2        | Ras association (RalGDS/AF-6) domain family member 2                                         | Cluster0022_B cell-related    |
| 1421235_s_at | Recq15        | RecQ protein-like 5                                                                          | Cluster0022_B cell-related    |
| 1444346_at   | Sh3bp5        | SH3-domain binding protein 5 (BTK-associated)                                                | Cluster0022_B cell-related    |
| 1435955_at   | Siglecg       | sialic acid binding Ig-like lectin G                                                         | Cluster0022_B cell-related    |
| 1416206_at   | Sipa1         | signal-induced proliferation associated gene 1                                               | Cluster0022_B cell-related    |
| 1450675_at   | Smap2         | stromal membrane-associated GTPase-activating protein 2                                      | Cluster0022_B cell-related    |
| 1452789_at   | Snn           | stannin                                                                                      | Cluster0022_B cell-related    |
| 1456922_at   | Snx29         | sorting nexin 29                                                                             | Cluster0022_B cell-related    |
| 1460407_at   | SpiB          | Spi-B transcription factor (Spi-1/PU.1 related)                                              | Cluster0022_B cell-related    |
| 1418798_s_at | SrpK3         | serine/arginine-rich protein specific kinase 3                                               | Cluster0022_B cell-related    |
| 1431825_at   | SrpK3         | serine/arginine-rich protein specific kinase 3                                               | Cluster0022_B cell-related    |
| 1447806_s_at | SrpK3         | serine/arginine-rich protein specific kinase 3                                               | Cluster0022_B cell-related    |
| 1423543_at   | Swap70        | SWA-70 protein                                                                               | Cluster0022_B cell-related    |
| 1434225_at   | Swap70        | SWA-70 protein                                                                               | Cluster0022_B cell-related    |
| 1423182_at   | Tnfrsf13b     | tumor necrosis factor receptor superfamily, member 13b                                       | Cluster0022_B cell-related    |
| 1419307_at   | Tnfrsf13c     | tumor necrosis factor receptor superfamily, member 13c                                       | Cluster0022_B cell-related    |
| 1424857_a_at | Trim34        | tripartite motif-containing 34                                                               | Cluster0022_B cell-related    |
| 1425743_at   | Trim7         | tripartite motif-containing 7                                                                | Cluster0022_B cell-related    |
| 1439352_at   | Trim7         | tripartite motif-containing 7                                                                | Cluster0022_B cell-related    |
| 1421478_a_at | Zfp318        | zinc finger protein 318                                                                      | Cluster0022_B cell-related    |
| 1421479_at   | Zfp318        | zinc finger protein 318                                                                      | Cluster0022_B cell-related    |
| 1425346_at   | Zfp318        | zinc finger protein 318                                                                      | Cluster0022_B cell-related    |
| 1425347_a_at | Zfp318        | zinc finger protein 318                                                                      | Cluster0022_B cell-related    |
| 1452573_a_at | 0610007P08Rik | RIKEN cDNA 0610007P08 gene                                                                   | Cluster0023_Mast cell-related |
| 1429604_at   | 1810011H11Rik | RIKEN cDNA 1810011H11 gene                                                                   | Cluster0023_Mast cell-related |
| 1429700_at   | 3110040M04Rik | RIKEN cDNA 3110040M04 gene                                                                   | Cluster0023_Mast cell-related |
| 1431185_at   | 4930503B20Rik | RIKEN cDNA 4930503B20 gene                                                                   | Cluster0023_Mast cell-related |
| 1431910_at   | 5730460C07Rik | RIKEN cDNA 5730460C07 gene                                                                   | Cluster0023_Mast cell-related |
| 1439179_a_at | 5830405N20Rik | RIKEN cDNA 5830405N20 gene                                                                   | Cluster0023_Mast cell-related |
| 1423072_at   | 6720475J19Rik | RIKEN cDNA 6720475J19 gene                                                                   | Cluster0023_Mast cell-related |
| 1455338_at   | A4galt        | alpha 1,4-galactosyltransferase                                                              | Cluster0023_Mast cell-related |
| 1446542_at   | Acsc2         | acyl-CoA synthetase short-chain family member 2                                              | Cluster0023_Mast cell-related |

|              |                    |                                                                                                                                                                         |                               |
|--------------|--------------------|-------------------------------------------------------------------------------------------------------------------------------------------------------------------------|-------------------------------|
| 1457460_at   | AcsS2              | acyl-CoA synthetase short-chain family member 2                                                                                                                         | Cluster0023_Mast cell-related |
| 1445546_at   | AI844685           | expressed sequence AI844685                                                                                                                                             | Cluster0023_Mast cell-related |
| 1460003_at   | AI956758           | expressed sequence AI956758                                                                                                                                             | Cluster0023_Mast cell-related |
| 1441962_at   | Alox5              | arachidonate 5-lipoxygenase                                                                                                                                             | Cluster0023_Mast cell-related |
| 1453782_at   | Ankrd33b           | ankyrin repeat domain 33B                                                                                                                                               | Cluster0023_Mast cell-related |
| 1432410_a_at | Bmp7               | bone morphogenetic protein 7                                                                                                                                            | Cluster0023_Mast cell-related |
| 1422755_at   | Btk                | Bruton agammaglobulinemia tyrosine kinase                                                                                                                               | Cluster0023_Mast cell-related |
| 1428928_at   | Cacnb4             | calcium channel, voltage-dependent, beta 4 subunit                                                                                                                      | Cluster0023_Mast cell-related |
| 1436912_at   | Cacnb4             | calcium channel, voltage-dependent, beta 4 subunit                                                                                                                      | Cluster0023_Mast cell-related |
| 1452089_at   | Cacnb4             | calcium channel, voltage-dependent, beta 4 subunit                                                                                                                      | Cluster0023_Mast cell-related |
| 1418921_at   | Cadm3              | cell adhesion molecule 3                                                                                                                                                | Cluster0023_Mast cell-related |
| 1418922_at   | Cadm3              | cell adhesion molecule 3                                                                                                                                                | Cluster0023_Mast cell-related |
| 1449272_at   | Cadm3              | cell adhesion molecule 3                                                                                                                                                | Cluster0023_Mast cell-related |
| 1427355_at   | Calca              | calcitonin/calcitonin-related polypeptide, alpha                                                                                                                        | Cluster0023_Mast cell-related |
| 1422349_at   | Ccr11              | chemokine (C-C motif) receptor 1-like 1                                                                                                                                 | Cluster0023_Mast cell-related |
| 1418762_at   | Cd55               | CD55 antigen                                                                                                                                                            | Cluster0023_Mast cell-related |
| 1443906_at   | Cd55               | CD55 antigen                                                                                                                                                            | Cluster0023_Mast cell-related |
| 1460242_at   | Cd55               | CD55 antigen                                                                                                                                                            | Cluster0023_Mast cell-related |
| 1429830_a_at | Cd59a              | CD59a antigen                                                                                                                                                           | Cluster0023_Mast cell-related |
| 1421267_a_at | Cited2             | Cbp/p300-interacting transactivator, with Glu/Asp-rich carboxy-terminal domain, 2                                                                                       | Cluster0023_Mast cell-related |
| 1452207_at   | Cited2             | Cbp/p300-interacting transactivator, with Glu/Asp-rich carboxy-terminal domain, 2                                                                                       | Cluster0023_Mast cell-related |
| 1421326_at   | Csf2rb             | colony stimulating factor 2 receptor, beta, low-affinity (granulocyte-macrophage)                                                                                       | Cluster0023_Mast cell-related |
| 1450200_s_at | Csf2rb /// Csf2rb2 | colony stimulating factor 2 receptor, beta, low-affinity (granulocyte-macrophage) /// colony stimulating factor 2 receptor, beta, low-affinity (granulocyte-macrophage) | Cluster0023_Mast cell-related |
| 1419202_at   | Cst7               | cystatin F (leukocystatin)                                                                                                                                              | Cluster0023_Mast cell-related |
| 1450019_at   | Cx3cr1             | chemokine (C-X3-C) receptor 1                                                                                                                                           | Cluster0023_Mast cell-related |
| 1448804_at   | Cyp11a1            | cytochrome P450, family 11, subfamily a, polypeptide 1                                                                                                                  | Cluster0023_Mast cell-related |
| 1424352_at   | Cyp4a12a           | cytochrome P450, family 4, subfamily a, polypeptide 12a                                                                                                                 | Cluster0023_Mast cell-related |
| 1421199_at   | Dlg2               | discs, large homolog 2 (Drosophila)                                                                                                                                     | Cluster0023_Mast cell-related |
| 1437927_at   | Dlg2               | discs, large homolog 2 (Drosophila)                                                                                                                                     | Cluster0023_Mast cell-related |
| 1418591_at   | Dnaja4             | DnaJ (Hsp40) homolog, subfamily A, member 4                                                                                                                             | Cluster0023_Mast cell-related |
| 1418592_at   | Dnaja4             | DnaJ (Hsp40) homolog, subfamily A, member 4                                                                                                                             | Cluster0023_Mast cell-related |
| 1434196_at   | Dnaja4             | DnaJ (Hsp40) homolog, subfamily A, member 4                                                                                                                             | Cluster0023_Mast cell-related |
| 1425403_at   | Dnm3               | dynamamin 3                                                                                                                                                             | Cluster0023_Mast cell-related |
| 1438801_at   | Dnm3               | dynamamin 3                                                                                                                                                             | Cluster0023_Mast cell-related |
| 1436545_at   | Dtx4               | deltex 4 homolog (Drosophila)                                                                                                                                           | Cluster0023_Mast cell-related |
| 1453074_at   | Dusp23             | dual specificity phosphatase 23                                                                                                                                         | Cluster0023_Mast cell-related |
| 1433673_at   | E130309D14Rik      | RIKEN cDNA E130309D14 gene                                                                                                                                              | Cluster0023_Mast cell-related |
| 1448613_at   | Ecm1               | extracellular matrix protein 1                                                                                                                                          | Cluster0023_Mast cell-related |
| 1428638_at   | Efhc2              | EF-hand domain (C-terminal) containing 2                                                                                                                                | Cluster0023_Mast cell-related |
| 1431162_a_at | Enah               | enabled homolog (Drosophila)                                                                                                                                            | Cluster0023_Mast cell-related |
| 1460480_at   | Erv3               | endogenous retroviral sequence 3                                                                                                                                        | Cluster0023_Mast cell-related |
| 1448929_at   | F13a1              | coagulation factor XIII, A1 subunit                                                                                                                                     | Cluster0023_Mast cell-related |
| 1448231_at   | Fkbp5              | FK506 binding protein 5                                                                                                                                                 | Cluster0023_Mast cell-related |
| 1449232_at   | Gata1              | GATA binding protein 1                                                                                                                                                  | Cluster0023_Mast cell-related |
| 1428816_a_at | Gata2              | GATA binding protein 2                                                                                                                                                  | Cluster0023_Mast cell-related |
| 1450333_a_at | Gata2              | GATA binding protein 2                                                                                                                                                  | Cluster0023_Mast cell-related |
| 1446631_at   | Gm14047            | predicted gene 14047                                                                                                                                                    | Cluster0023_Mast cell-related |
| 1422316_at   | Gp1ba              | glycoprotein 1b, alpha polypeptide                                                                                                                                      | Cluster0023_Mast cell-related |
| 1426099_at   | Hrh4               | histamine receptor H4                                                                                                                                                   | Cluster0023_Mast cell-related |
| 1420938_at   | Hs6st2             | heparan sulfate 6-O-sulfotransferase 2                                                                                                                                  | Cluster0023_Mast cell-related |
| 1460664_at   | Ikzf4              | IKAROS family zinc finger 4                                                                                                                                             | Cluster0023_Mast cell-related |
| 1424195_a_at | Inpp5d             | inositol polyphosphate-5-phosphatase D                                                                                                                                  | Cluster0023_Mast cell-related |
| 1437912_at   | Iqsec3             | IQ motif and Sec7 domain 3                                                                                                                                              | Cluster0023_Mast cell-related |
| 1417758_at   | Itga2b             | integrin alpha 2b                                                                                                                                                       | Cluster0023_Mast cell-related |
| 1415961_at   | Itn2c              | integral membrane protein 2C                                                                                                                                            | Cluster0023_Mast cell-related |
| 1415900_a_at | Kit                | kit oncogene                                                                                                                                                            | Cluster0023_Mast cell-related |
| 1450160_at   | Lif                | leukemia inhibitory factor                                                                                                                                              | Cluster0023_Mast cell-related |

|              |          |                                                                                                   |                               |
|--------------|----------|---------------------------------------------------------------------------------------------------|-------------------------------|
| 1421369_at   | Mab2111  | mab-21-like 1 (C. elegans)                                                                        | Cluster0023_Mast cell-related |
| 1425967_at   | Mcpt4    | mast cell protease 4                                                                              | Cluster0023_Mast cell-related |
| 1451926_at   | Mrgpra4  | MAS-related GPR, member A4                                                                        | Cluster0023_Mast cell-related |
| 1421475_at   | Ms4a2    | membrane-spanning 4-domains, subfamily A, member 2                                                | Cluster0023_Mast cell-related |
| 1451612_at   | Mt1      | metallothionein 1                                                                                 | Cluster0023_Mast cell-related |
| 1439699_at   | NA       | ---                                                                                               | Cluster0023_Mast cell-related |
| 1443191_at   | NA       | ---                                                                                               | Cluster0023_Mast cell-related |
| 1443405_at   | NA       | ---                                                                                               | Cluster0023_Mast cell-related |
| 1445467_at   | NA       | ---                                                                                               | Cluster0023_Mast cell-related |
| 1447014_at   | NA       | ---                                                                                               | Cluster0023_Mast cell-related |
| 1457381_at   | NA       | ---                                                                                               | Cluster0023_Mast cell-related |
| 1458194_at   | NA       | ---                                                                                               | Cluster0023_Mast cell-related |
| 1458876_at   | NA       | ---                                                                                               | Cluster0023_Mast cell-related |
| 1459249_at   | NA       | ---                                                                                               | Cluster0023_Mast cell-related |
| 1456881_at   | Nbeal2   | neurobeachin-like 2                                                                               | Cluster0023_Mast cell-related |
| 1417931_at   | Ndst2    | N-deacetylase/N-sulfotransferase (heparan glucosaminyll) 2                                        | Cluster0023_Mast cell-related |
| 1435355_at   | Neb      | nebulin                                                                                           | Cluster0023_Mast cell-related |
| 1419405_at   | Nmb      | neuromedin B                                                                                      | Cluster0023_Mast cell-related |
| 1449312_at   | Npy5r    | neuropeptide Y receptor Y5                                                                        | Cluster0023_Mast cell-related |
| 1423231_at   | Nrgn     | neurogranin                                                                                       | Cluster0023_Mast cell-related |
| 1450611_at   | Orm3     | orosomucoid 3                                                                                     | Cluster0023_Mast cell-related |
| 1419853_a_at | P2rx7    | purinergic receptor P2X, ligand-gated ion channel, 7                                              | Cluster0023_Mast cell-related |
| 1422218_at   | P2rx7    | purinergic receptor P2X, ligand-gated ion channel, 7                                              | Cluster0023_Mast cell-related |
| 1439787_at   | P2rx7    | purinergic receptor P2X, ligand-gated ion channel, 7                                              | Cluster0023_Mast cell-related |
| 1418252_at   | Pad12    | peptidyl arginine deiminase, type II                                                              | Cluster0023_Mast cell-related |
| 1426036_a_at | Pde1c    | phosphodiesterase 1C                                                                              | Cluster0023_Mast cell-related |
| 1429643_a_at | Pde1c    | phosphodiesterase 1C                                                                              | Cluster0023_Mast cell-related |
| 1436251_at   | Pde1c    | phosphodiesterase 1C                                                                              | Cluster0023_Mast cell-related |
| 1417689_a_at | Pdzk1ip1 | PDZK1 interacting protein 1                                                                       | Cluster0023_Mast cell-related |
| 1421444_at   | Pgr      | progesterone receptor                                                                             | Cluster0023_Mast cell-related |
| 1455772_at   | Pgr      | progesterone receptor                                                                             | Cluster0023_Mast cell-related |
| 1440143_at   | Pigz     | phosphatidylinositol glycan anchor biosynthesis, class Z                                          | Cluster0023_Mast cell-related |
| 1458306_at   | Pigz     | phosphatidylinositol glycan anchor biosynthesis, class Z                                          | Cluster0023_Mast cell-related |
| 1439087_a_at | Pik3ip1  | phosphoinositide-3-kinase interacting protein 1                                                   | Cluster0023_Mast cell-related |
| 1443406_at   | Plscr4   | phospholipid scramblase 4                                                                         | Cluster0023_Mast cell-related |
| 1418912_at   | Plxdc2   | plexin domain containing 2                                                                        | Cluster0023_Mast cell-related |
| 1431110_at   | Plxdc2   | plexin domain containing 2                                                                        | Cluster0023_Mast cell-related |
| 1449270_at   | Plxdc2   | plexin domain containing 2                                                                        | Cluster0023_Mast cell-related |
| 1446582_at   | Poln     | DNA polymerase N                                                                                  | Cluster0023_Mast cell-related |
| 1451364_at   | Polr3gl  | polymerase (RNA) III (DNA directed) polypeptide G like                                            | Cluster0023_Mast cell-related |
| 1420610_at   | Prkacb   | protein kinase, cAMP dependent, catalytic, beta                                                   | Cluster0023_Mast cell-related |
| 1416130_at   | Prnp     | prion protein                                                                                     | Cluster0023_Mast cell-related |
| 1425251_at   | Ptger3   | prostaglandin E receptor 3 (subtype EP3)                                                          | Cluster0023_Mast cell-related |
| 1450344_a_at | Ptger3   | prostaglandin E receptor 3 (subtype EP3)                                                          | Cluster0023_Mast cell-related |
| 1450122_at   | Ptprg    | protein tyrosine phosphatase, receptor type, G                                                    | Cluster0023_Mast cell-related |
| 1433947_at   | Rab37    | RAB37, member of RAS oncogene family                                                              | Cluster0023_Mast cell-related |
| 1450167_at   | Rab37    | RAB37, member of RAS oncogene family                                                              | Cluster0023_Mast cell-related |
| 1417700_at   | Rab38    | RAB38, member of RAS oncogene family                                                              | Cluster0023_Mast cell-related |
| 1456980_at   | Rab44    | RAB44, member RAS oncogene family                                                                 | Cluster0023_Mast cell-related |
| 1440208_at   | Rac2     | RAS-related C3 botulinum substrate 2                                                              | Cluster0023_Mast cell-related |
| 1449331_a_at | Rapsn    | receptor-associated protein of the synapse                                                        | Cluster0023_Mast cell-related |
| 1425380_at   | Rasgrp4  | RAS guanyl releasing protein 4                                                                    | Cluster0023_Mast cell-related |
| 1422552_at   | Rprm     | reprimin, TP53 dependent G2 arrest mediator candidate                                             | Cluster0023_Mast cell-related |
| 1422865_at   | Runx1    | runt related transcription factor 1                                                               | Cluster0023_Mast cell-related |
| 1420818_at   | Sla      | src-like adaptor                                                                                  | Cluster0023_Mast cell-related |
| 1417929_at   | Slc7a8   | solute carrier family 7 (cationic amino acid transporter, y+ system), member 8                    | Cluster0023_Mast cell-related |
| 1460292_a_at | Smarca1  | SWI/SNF related, matrix associated, actin dependent regulator of chromatin, subfamily a, member 1 | Cluster0023_Mast cell-related |

|              |                           |                                                                                                           |                               |
|--------------|---------------------------|-----------------------------------------------------------------------------------------------------------|-------------------------------|
| 1450446_a_at | Socs1                     | suppressor of cytokine signaling 1                                                                        | Cluster0023_Mast cell-related |
| 1454710_at   | Spink2                    | serine peptidase inhibitor, Kazal type 2                                                                  | Cluster0023_Mast cell-related |
| 1422133_at   | Spn                       | sialophorin                                                                                               | Cluster0023_Mast cell-related |
| 1436324_at   | Stard9                    | START domain containing 9                                                                                 | Cluster0023_Mast cell-related |
| 1430301_at   | Stxbp5                    | syntaxin binding protein 5 (tomosyn)                                                                      | Cluster0023_Mast cell-related |
| 1435398_at   | Stxbp5                    | syntaxin binding protein 5 (tomosyn)                                                                      | Cluster0023_Mast cell-related |
| 1427222_a_at | Svs4                      | seminal vesicle secretory protein 4                                                                       | Cluster0023_Mast cell-related |
| 1449389_at   | Tal1                      | T-cell acute lymphocytic leukemia 1                                                                       | Cluster0023_Mast cell-related |
| 1416827_at   | Tbxas1                    | thromboxane A synthase 1, platelet                                                                        | Cluster0023_Mast cell-related |
| 1420893_a_at | Tgfr1                     | transforming growth factor, beta receptor I                                                               | Cluster0023_Mast cell-related |
| 1420894_at   | Tgfr1                     | transforming growth factor, beta receptor I                                                               | Cluster0023_Mast cell-related |
| 1428074_at   | Tmem158                   | transmembrane protein 158                                                                                 | Cluster0023_Mast cell-related |
| 1452652_at   | Tmem158                   | transmembrane protein 158                                                                                 | Cluster0023_Mast cell-related |
| 1419557_a_at | Tmem9                     | transmembrane protein 9                                                                                   | Cluster0023_Mast cell-related |
| 1422180_a_at | Tpsb2                     | tryptase beta 2                                                                                           | Cluster0023_Mast cell-related |
| 1449564_at   | Tpsg1                     | tryptase gamma 1                                                                                          | Cluster0023_Mast cell-related |
| 1449431_at   | Trpc6                     | transient receptor potential cation channel, subfamily C, member 6                                        | Cluster0023_Mast cell-related |
| 1423812_s_at | Vopp1                     | vesicular, overexpressed in cancer, prosurvival protein 1                                                 | Cluster0023_Mast cell-related |
| 1451127_at   | Vopp1                     | vesicular, overexpressed in cancer, prosurvival protein 1                                                 | Cluster0023_Mast cell-related |
| 1431359_a_at | 1110007C09Rik             | RIKEN cDNA 1110007C09 gene                                                                                | Cluster0024_Phagocyte-related |
| 1431712_a_at | 2310022A10Rik             | RIKEN cDNA 2310022A10 gene                                                                                | Cluster0024_Phagocyte-related |
| 1434048_at   | 4930471M23Rik             | RIKEN cDNA 4930471M23 gene                                                                                | Cluster0024_Phagocyte-related |
| 1424987_at   | 5430435G22Rik             | RIKEN cDNA 5430435G22 gene                                                                                | Cluster0024_Phagocyte-related |
| 1435830_a_at | 5430435G22Rik             | RIKEN cDNA 5430435G22 gene                                                                                | Cluster0024_Phagocyte-related |
| 1444063_at   | 5430435G22Rik             | RIKEN cDNA 5430435G22 gene                                                                                | Cluster0024_Phagocyte-related |
| 1457096_at   | 6430520M22Rik /// Bhlhe41 | RIKEN cDNA 6430520M22 gene /// basic helix-loop-helix family, member e41                                  | Cluster0024_Phagocyte-related |
| 1420684_at   | Acox3                     | acyl-Coenzyme A oxidase 3, pristanoyl                                                                     | Cluster0024_Phagocyte-related |
| 1428057_a_at | Ahnak                     | AHNAK nucleoprotein (desmoyokin)                                                                          | Cluster0024_Phagocyte-related |
| 1428058_at   | Ahnak                     | AHNAK nucleoprotein (desmoyokin)                                                                          | Cluster0024_Phagocyte-related |
| 1429466_s_at | Aph1b /// Aph1c           | anterior pharynx defective 1b homolog (C. elegans) /// anterior pharynx defective 1c homolog (C. elegans) | Cluster0024_Phagocyte-related |
| 1428137_at   | Arl8b                     | ADP-ribosylation factor-like 8B                                                                           | Cluster0024_Phagocyte-related |
| 1428138_s_at | Arl8b                     | ADP-ribosylation factor-like 8B                                                                           | Cluster0024_Phagocyte-related |
| 1427481_a_at | Atp1a3                    | ATPase, Na <sup>+</sup> /K <sup>+</sup> transporting, alpha 3 polypeptide                                 | Cluster0024_Phagocyte-related |
| 1425227_a_at | Atp6v0a1                  | ATPase, H <sup>+</sup> transporting, lysosomal V0 subunit A1                                              | Cluster0024_Phagocyte-related |
| 1434798_at   | Atp6v0d2                  | ATPase, H <sup>+</sup> transporting, lysosomal V0 subunit D2                                              | Cluster0024_Phagocyte-related |
| 1444176_at   | Atp6v0d2                  | ATPase, H <sup>+</sup> transporting, lysosomal V0 subunit D2                                              | Cluster0024_Phagocyte-related |
| 1416328_a_at | Atp6v0e                   | ATPase, H <sup>+</sup> transporting, lysosomal V0 subunit E                                               | Cluster0024_Phagocyte-related |
| 1422508_at   | Atp6v1a                   | ATPase, H <sup>+</sup> transporting, lysosomal V1 subunit A                                               | Cluster0024_Phagocyte-related |
| 1450634_at   | Atp6v1a                   | ATPase, H <sup>+</sup> transporting, lysosomal V1 subunit A                                               | Cluster0024_Phagocyte-related |
| 1415814_at   | Atp6v1b2                  | ATPase, H <sup>+</sup> transporting, lysosomal V1 subunit B2                                              | Cluster0024_Phagocyte-related |
| 1419883_s_at | Atp6v1b2                  | ATPase, H <sup>+</sup> transporting, lysosomal V1 subunit B2                                              | Cluster0024_Phagocyte-related |
| 1419544_at   | Atp6v1c1                  | ATPase, H <sup>+</sup> transporting, lysosomal V1 subunit C1                                              | Cluster0024_Phagocyte-related |
| 1419545_a_at | Atp6v1c1                  | ATPase, H <sup>+</sup> transporting, lysosomal V1 subunit C1                                              | Cluster0024_Phagocyte-related |
| 1419546_at   | Atp6v1c1                  | ATPase, H <sup>+</sup> transporting, lysosomal V1 subunit C1                                              | Cluster0024_Phagocyte-related |
| 1416952_at   | Atp6v1d                   | ATPase, H <sup>+</sup> transporting, lysosomal V1 subunit D                                               | Cluster0024_Phagocyte-related |
| 1415826_at   | Atp6v1h                   | ATPase, H <sup>+</sup> transporting, lysosomal V1 subunit H                                               | Cluster0024_Phagocyte-related |
| 1449164_at   | Cd68                      | CD68 antigen                                                                                              | Cluster0024_Phagocyte-related |
| 1422875_at   | Cd84                      | CD84 antigen                                                                                              | Cluster0024_Phagocyte-related |
| 1422494_s_at | Cdk20                     | cyclin-dependent kinase 20                                                                                | Cluster0024_Phagocyte-related |
| 1417649_at   | Cdkn1c                    | cyclin-dependent kinase inhibitor 1C (P57)                                                                | Cluster0024_Phagocyte-related |
| 1448456_at   | Cln8                      | ceroid-lipofuscinosis, neuronal 8                                                                         | Cluster0024_Phagocyte-related |
| 1455745_at   | Cln8                      | ceroid-lipofuscinosis, neuronal 8                                                                         | Cluster0024_Phagocyte-related |
| 1420703_at   | Csf2ra                    | colony stimulating factor 2 receptor, alpha, low-affinity (granulocyte-macrophage)                        | Cluster0024_Phagocyte-related |
| 1417491_at   | Ctsb                      | cathepsin B                                                                                               | Cluster0024_Phagocyte-related |
| 1457724_at   | Ctsl                      | cathepsin L                                                                                               | Cluster0024_Phagocyte-related |
| 1417869_s_at | Ctsz                      | cathepsin Z                                                                                               | Cluster0024_Phagocyte-related |
| 1451970_at   | Daglb                     | diacylglycerol lipase, beta                                                                               | Cluster0024_Phagocyte-related |

|              |                                          |                                                                                                                        |                               |
|--------------|------------------------------------------|------------------------------------------------------------------------------------------------------------------------|-------------------------------|
| 1423064_at   | Dnmt3a                                   | DNA methyltransferase 3A                                                                                               | Cluster0024_Phagocyte-related |
| 1423065_at   | Dnmt3a                                   | DNA methyltransferase 3A                                                                                               | Cluster0024_Phagocyte-related |
| 1423066_at   | Dnmt3a                                   | DNA methyltransferase 3A                                                                                               | Cluster0024_Phagocyte-related |
| 1436479_a_at | Dpp7                                     | dipeptidylpeptidase 7                                                                                                  | Cluster0024_Phagocyte-related |
| 1434263_at   | F630110N24Rik                            | RIKEN cDNA F630110N24 gene                                                                                             | Cluster0024_Phagocyte-related |
| 1419321_at   | F7                                       | coagulation factor VII                                                                                                 | Cluster0024_Phagocyte-related |
| 1416022_at   | Fabp5                                    | fatty acid binding protein 5, epidermal                                                                                | Cluster0024_Phagocyte-related |
| 1416021_a_at | Fabp5 /// Gm6166                         | fatty acid binding protein 5, epidermal /// predicted gene 6166                                                        | Cluster0024_Phagocyte-related |
| 1439189_at   | Fnip2                                    | folliculin interacting protein 2                                                                                       | Cluster0024_Phagocyte-related |
| 1422301_at   | Ftl1 /// Ftl2 /// Gm10116 /// Gm12164 // | ferritin light chain 1 /// ferritin light chain 2 /// ferritin light chain 1 pseudogene /// ferritin light chain 1 pse | Cluster0024_Phagocyte-related |
| 1420547_at   | Galc                                     | galactosylceramidase                                                                                                   | Cluster0024_Phagocyte-related |
| 1448744_at   | Galns                                    | galactosamine (N-acetyl)-6-sulfate sulfatase                                                                           | Cluster0024_Phagocyte-related |
| 1418248_at   | Gla                                      | galactosidase, alpha                                                                                                   | Cluster0024_Phagocyte-related |
| 1449006_at   | Gla                                      | galactosidase, alpha                                                                                                   | Cluster0024_Phagocyte-related |
| 1439345_at   | Gpnmb                                    | glycoprotein (transmembrane) nmb                                                                                       | Cluster0024_Phagocyte-related |
| 1448303_at   | Gpnmb                                    | glycoprotein (transmembrane) nmb                                                                                       | Cluster0024_Phagocyte-related |
| 1450881_s_at | Gpr137b                                  | G protein-coupled receptor 137B                                                                                        | Cluster0024_Phagocyte-related |
| 1423164_at   | Gpr137b /// Gpr137b-ps                   | G protein-coupled receptor 137B /// G protein-coupled receptor 137B, pseudogene                                        | Cluster0024_Phagocyte-related |
| 1429775_a_at | Gpr137b /// Gpr137b-ps /// LOC1000449:   | G protein-coupled receptor 137B /// G protein-coupled receptor 137B, pseudogene /// similar to Gpr137b                 | Cluster0024_Phagocyte-related |
| 1439255_s_at | Gpr137b /// Gpr137b-ps /// LOC1000449:   | G protein-coupled receptor 137B /// G protein-coupled receptor 137B, pseudogene /// similar to Gpr137b                 | Cluster0024_Phagocyte-related |
| 1450882_s_at | Gpr137b /// Gpr137b-ps /// LOC1000449:   | G protein-coupled receptor 137B /// G protein-coupled receptor 137B, pseudogene /// similar to Gpr137b                 | Cluster0024_Phagocyte-related |
| 1449670_x_at | Gpr137b /// LOC100044979                 | G protein-coupled receptor 137B /// similar to Gpr137b protein                                                         | Cluster0024_Phagocyte-related |
| 1439256_x_at | Gpr137b-ps                               | G protein-coupled receptor 137B, pseudogene                                                                            | Cluster0024_Phagocyte-related |
| 1430332_a_at | Gusb                                     | glucuronidase, beta                                                                                                    | Cluster0024_Phagocyte-related |
| 1448124_at   | Gusb                                     | glucuronidase, beta                                                                                                    | Cluster0024_Phagocyte-related |
| 1434129_s_at | Lhfp12                                   | lipoma HMGIC fusion partner-like 2                                                                                     | Cluster0024_Phagocyte-related |
| 1434130_at   | Lhfp12                                   | lipoma HMGIC fusion partner-like 2                                                                                     | Cluster0024_Phagocyte-related |
| 1454847_at   | Lhfp12                                   | lipoma HMGIC fusion partner-like 2                                                                                     | Cluster0024_Phagocyte-related |
| 1423140_at   | Lipa                                     | lysosomal acid lipase A                                                                                                | Cluster0024_Phagocyte-related |
| 1423141_at   | Lipa                                     | lysosomal acid lipase A                                                                                                | Cluster0024_Phagocyte-related |
| 1450872_s_at | Lipa                                     | lysosomal acid lipase A                                                                                                | Cluster0024_Phagocyte-related |
| 1452440_at   | LOC100048347 /// Tnfsf12 /// Tnfsf12-Tn  | similar to TWEAK /// tumor necrosis factor (ligand) superfamily, member 12 /// Tnfsf12-tnfsf13 readthroug              | Cluster0024_Phagocyte-related |
| 1429863_at   | Lonrf3                                   | LON peptidase N-terminal domain and ring finger 3                                                                      | Cluster0024_Phagocyte-related |
| 1436200_at   | Lonrf3                                   | LON peptidase N-terminal domain and ring finger 3                                                                      | Cluster0024_Phagocyte-related |
| 1431217_at   | Lrrc27                                   | leucine rich repeat containing 27                                                                                      | Cluster0024_Phagocyte-related |
| 1452865_at   | Lrrc27                                   | leucine rich repeat containing 27                                                                                      | Cluster0024_Phagocyte-related |
| 1453152_at   | Mamdc2                                   | MAM domain containing 2                                                                                                | Cluster0024_Phagocyte-related |
| 1432329_a_at | Matk                                     | megakaryocyte-associated tyrosine kinase                                                                               | Cluster0024_Phagocyte-related |
| 1442691_at   | NA                                       | ---                                                                                                                    | Cluster0024_Phagocyte-related |
| 1417706_at   | Naglu                                    | alpha-N-acetylglucosaminidase (Sanfilippo disease IIIB)                                                                | Cluster0024_Phagocyte-related |
| 1441281_s_at | Ninj1                                    | ninjurin 1                                                                                                             | Cluster0024_Phagocyte-related |
| 1448417_at   | Ninj1                                    | ninjurin 1                                                                                                             | Cluster0024_Phagocyte-related |
| 1455768_at   | Npc2                                     | Niemann Pick type C2                                                                                                   | Cluster0024_Phagocyte-related |
| 1424954_a_at | Pip5k1c                                  | phosphatidylinositol-4-phosphate 5-kinase, type 1 gamma                                                                | Cluster0024_Phagocyte-related |
| 1416013_at   | Pld3                                     | phospholipase D family, member 3                                                                                       | Cluster0024_Phagocyte-related |
| 1454746_at   | Plekhh1                                  | pleckstrin homology domain containing, family M (with RUN domain) member 1                                             | Cluster0024_Phagocyte-related |
| 1437740_at   | Plekhh2                                  | pleckstrin homology domain containing, family M (with RUN domain) member 2                                             | Cluster0024_Phagocyte-related |
| 1429646_at   | Prss46                                   | protease, serine, 46                                                                                                   | Cluster0024_Phagocyte-related |
| 1421813_a_at | Psap                                     | prosaposin                                                                                                             | Cluster0024_Phagocyte-related |
| 1426622_a_at | Qpct                                     | glutaminyl-peptide cyclotransferase (glutaminyl cyclase)                                                               | Cluster0024_Phagocyte-related |
| 1430726_at   | Rassf8                                   | Ras association (RalGDS/AF-6) domain family (N-terminal) member 8                                                      | Cluster0024_Phagocyte-related |
| 1438713_at   | Rassf8                                   | Ras association (RalGDS/AF-6) domain family (N-terminal) member 8                                                      | Cluster0024_Phagocyte-related |
| 1452283_at   | Rassf8                                   | Ras association (RalGDS/AF-6) domain family (N-terminal) member 8                                                      | Cluster0024_Phagocyte-related |
| 1450107_a_at | Renbp                                    | renin binding protein                                                                                                  | Cluster0024_Phagocyte-related |
| 1418535_at   | Rgl1                                     | ral guanine nucleotide dissociation stimulator,-like 1                                                                 | Cluster0024_Phagocyte-related |
| 1424976_at   | Rhov                                     | ras homolog gene family, member V                                                                                      | Cluster0024_Phagocyte-related |
| 1423134_at   | Rilpl2                                   | Rab interacting lysosomal protein-like 2                                                                               | Cluster0024_Phagocyte-related |

|              |                                         |                                                                                                           |                                      |
|--------------|-----------------------------------------|-----------------------------------------------------------------------------------------------------------|--------------------------------------|
| 1451201_s_at | Rnh1                                    | ribonuclease/angiogenin inhibitor 1                                                                       | Cluster0024_Phagocyte-related        |
| 1451013_at   | Slc29a3                                 | solute carrier family 29 (nucleoside transporters), member 3                                              | Cluster0024_Phagocyte-related        |
| 1455731_at   | Slc29a3                                 | solute carrier family 29 (nucleoside transporters), member 3                                              | Cluster0024_Phagocyte-related        |
| 1455249_at   | Slc36a4                                 | solute carrier family 36 (proton/amino acid symporter), member 4                                          | Cluster0024_Phagocyte-related        |
| 1421346_a_at | Slc6a6                                  | solute carrier family 6 (neurotransmitter transporter, taurine), member 6                                 | Cluster0024_Phagocyte-related        |
| 1430037_at   | Snx27                                   | sorting nexin family member 27                                                                            | Cluster0024_Phagocyte-related        |
| 1433614_at   | Snx27                                   | sorting nexin family member 27                                                                            | Cluster0024_Phagocyte-related        |
| 1451418_a_at | Spsb4                                   | splA/ryanodine receptor domain and SOCS box containing 4                                                  | Cluster0024_Phagocyte-related        |
| 1451419_at   | Spsb4                                   | splA/ryanodine receptor domain and SOCS box containing 4                                                  | Cluster0024_Phagocyte-related        |
| 1420635_a_at | Tcrg1                                   | T-cell, immune regulator 1, ATPase, H+ transporting, lysosomal V0 protein A3                              | Cluster0024_Phagocyte-related        |
| 1457753_at   | Tlr13                                   | toll-like receptor 13                                                                                     | Cluster0024_Phagocyte-related        |
| 1424411_at   | Tmem189                                 | transmembrane protein 189                                                                                 | Cluster0024_Phagocyte-related        |
| 1451341_s_at | Tmem189                                 | transmembrane protein 189                                                                                 | Cluster0024_Phagocyte-related        |
| 1418345_at   | Tnfsf12 /// Tnfsf12-Tnfsf13 /// Tnfsf13 | tumor necrosis factor (ligand) superfamily, member 12 /// Tnfsf12-tnfsf13 readthrough transcript /// tumo | Cluster0024_Phagocyte-related        |
| 1424304_at   | Tpcn2                                   | two pore segment channel 2                                                                                | Cluster0024_Phagocyte-related        |
| 1421792_s_at | Trem2                                   | triggering receptor expressed on myeloid cells 2                                                          | Cluster0024_Phagocyte-related        |
| 1422895_at   | Vamp4                                   | vesicle-associated membrane protein 4                                                                     | Cluster0024_Phagocyte-related        |
| 1427304_at   | Vps18                                   | vacuolar protein sorting 18 (yeast)                                                                       | Cluster0024_Phagocyte-related        |
| 1437819_s_at | Wdr91                                   | WD repeat domain 91                                                                                       | Cluster0024_Phagocyte-related        |
| 1456181_at   | Wdr91                                   | WD repeat domain 91                                                                                       | Cluster0024_Phagocyte-related        |
| 1448411_at   | Wfs1                                    | Wolfram syndrome 1 homolog (human)                                                                        | Cluster0024_Phagocyte-related        |
| 1437981_x_at | 1110057K04Rik                           | RIKEN cDNA 1110057K04 gene                                                                                | Cluster0025_Low in some Paneth cells |
| 1431414_at   | 1700003G18Rik                           | RIKEN cDNA 1700003G18 gene                                                                                | Cluster0025_Low in some Paneth cells |
| 1432116_at   | 1700031F05Rik                           | RIKEN cDNA 1700031F05 gene                                                                                | Cluster0025_Low in some Paneth cells |
| 1432476_at   | 1700040F17Rik                           | RIKEN cDNA 1700040F17 gene                                                                                | Cluster0025_Low in some Paneth cells |
| 1440520_a_at | 1700051A21Rik                           | RIKEN cDNA 1700051A21 gene                                                                                | Cluster0025_Low in some Paneth cells |
| 1447572_at   | 1700052I22Rik                           | RIKEN cDNA 1700052I22 gene                                                                                | Cluster0025_Low in some Paneth cells |
| 1432440_at   | 1700111E14Rik                           | RIKEN cDNA 1700111E14 gene                                                                                | Cluster0025_Low in some Paneth cells |
| 1432563_at   | 1700116B05Rik                           | RIKEN cDNA 1700116B05 gene                                                                                | Cluster0025_Low in some Paneth cells |
| 1460502_at   | 2010007E15Rik                           | RIKEN cDNA 2010007E15 gene                                                                                | Cluster0025_Low in some Paneth cells |
| 1447709_at   | 2410021H03Rik                           | RIKEN cDNA 2410021H03 gene                                                                                | Cluster0025_Low in some Paneth cells |
| 1431595_at   | 2900064B16Rik                           | RIKEN cDNA 2900064B16 gene                                                                                | Cluster0025_Low in some Paneth cells |
| 1433093_at   | 2900092N22Rik                           | RIKEN cDNA 2900092N22 gene                                                                                | Cluster0025_Low in some Paneth cells |
| 1430319_at   | 4833411C07Rik                           | RIKEN cDNA 4833411C07 gene                                                                                | Cluster0025_Low in some Paneth cells |
| 1431557_at   | 4930488N15Rik                           | RIKEN cDNA 4930488N15 gene                                                                                | Cluster0025_Low in some Paneth cells |
| 1454489_at   | 4930513L20Rik                           | RIKEN cDNA 4930513L20 gene                                                                                | Cluster0025_Low in some Paneth cells |
| 1430968_at   | 4930517O19Rik                           | RIKEN cDNA 4930517O19 gene                                                                                | Cluster0025_Low in some Paneth cells |
| 1431636_at   | 4930558K02Rik                           | RIKEN cDNA 4930558K02 gene                                                                                | Cluster0025_Low in some Paneth cells |
| 1431570_at   | 4930588G17Rik                           | RIKEN cDNA 4930588G17 gene                                                                                | Cluster0025_Low in some Paneth cells |
| 1433249_at   | 4931409D07Rik                           | RIKEN cDNA 4931409D07 gene                                                                                | Cluster0025_Low in some Paneth cells |
| 1431489_at   | 4933432K03Rik                           | RIKEN cDNA 4933432K03 gene                                                                                | Cluster0025_Low in some Paneth cells |
| 1433125_at   | 5330422M15Rik                           | RIKEN cDNA 5330422M15 gene                                                                                | Cluster0025_Low in some Paneth cells |
| 1432985_at   | 5430402M21Rik                           | RIKEN cDNA 5430402M21 gene                                                                                | Cluster0025_Low in some Paneth cells |
| 1433070_at   | 5830433M15Rik                           | RIKEN cDNA 5830433M15 gene                                                                                | Cluster0025_Low in some Paneth cells |
| 1458647_at   | 6430553K19Rik                           | RIKEN cDNA 6430553K19 gene                                                                                | Cluster0025_Low in some Paneth cells |
| 1432258_at   | 9430014N10Rik                           | RIKEN cDNA 9430014N10 gene                                                                                | Cluster0025_Low in some Paneth cells |
| 1433363_at   | A930036I15Rik                           | RIKEN cDNA A930036I15 gene                                                                                | Cluster0025_Low in some Paneth cells |
| 1416787_at   | Acvr1                                   | activin A receptor, type 1                                                                                | Cluster0025_Low in some Paneth cells |
| 1421651_at   | Ankrd22                                 | ankyrin repeat domain 22                                                                                  | Cluster0025_Low in some Paneth cells |
| 1459044_at   | AU015558                                | expressed sequence AU015558                                                                               | Cluster0025_Low in some Paneth cells |
| 1443967_at   | Banf2                                   | barrier to autointegration factor 2                                                                       | Cluster0025_Low in some Paneth cells |
| 1460087_at   | BC017643                                | cDNA sequence BC017643                                                                                    | Cluster0025_Low in some Paneth cells |
| 1433390_at   | BC049349                                | cDNA sequence BC049349                                                                                    | Cluster0025_Low in some Paneth cells |
| 1459220_at   | C78651                                  | expressed sequence C78651                                                                                 | Cluster0025_Low in some Paneth cells |
| 1443461_at   | C79130                                  | expressed sequence C79130                                                                                 | Cluster0025_Low in some Paneth cells |
| 1445973_at   | C79461                                  | expressed sequence C79461                                                                                 | Cluster0025_Low in some Paneth cells |
| 1442932_at   | C79709                                  | expressed sequence C79709                                                                                 | Cluster0025_Low in some Paneth cells |

|              |                       |                                                                                                             |                                      |
|--------------|-----------------------|-------------------------------------------------------------------------------------------------------------|--------------------------------------|
| 1445951_at   | C86345                | expressed sequence C86345                                                                                   | Cluster0025_Low in some Paneth cells |
| 1454336_at   | Ccnc                  | cyclin C                                                                                                    | Cluster0025_Low in some Paneth cells |
| 1445017_at   | Cnot2                 | CCR4-NOT transcription complex, subunit 2                                                                   | Cluster0025_Low in some Paneth cells |
| 1432834_at   | Cpb2                  | carboxypeptidase B2 (plasma)                                                                                | Cluster0025_Low in some Paneth cells |
| 1436283_at   | D630042F21Rik         | RIKEN cDNA D630042F21 gene                                                                                  | Cluster0025_Low in some Paneth cells |
| 1421864_at   | Dbil5                 | diazepam binding inhibitor-like 5                                                                           | Cluster0025_Low in some Paneth cells |
| 1452900_at   | Dgcr6                 | DiGeorge syndrome critical region gene 6                                                                    | Cluster0025_Low in some Paneth cells |
| 1442412_at   | Dnahc9                | dynein, axonemal, heavy chain 9                                                                             | Cluster0025_Low in some Paneth cells |
| 1444324_at   | E530001K10Rik         | RIKEN cDNA E530001K10 gene                                                                                  | Cluster0025_Low in some Paneth cells |
| 1438792_at   | Ergic1                | endoplasmic reticulum-golgi intermediate compartment (ERGIC) 1                                              | Cluster0025_Low in some Paneth cells |
| 1453861_at   | Fam78b                | family with sequence similarity 78, member B                                                                | Cluster0025_Low in some Paneth cells |
| 1456326_at   | Fndc3c1 /// LOC676436 | fibronectin type III domain containing 3C1 /// similar to Fibronectin type-III domain-containing protein 3a | Cluster0025_Low in some Paneth cells |
| 1450996_at   | Fshb                  | follicle stimulating hormone beta                                                                           | Cluster0025_Low in some Paneth cells |
| 1440155_at   | Fstl4                 | follistatin-like 4                                                                                          | Cluster0025_Low in some Paneth cells |
| 1421347_at   | Ftmt                  | ferritin mitochondrial                                                                                      | Cluster0025_Low in some Paneth cells |
| 1439280_at   | Gm13112               | predicted gene 13112                                                                                        | Cluster0025_Low in some Paneth cells |
| 1458169_at   | Gm9195                | predicted gene 9195                                                                                         | Cluster0025_Low in some Paneth cells |
| 1437970_at   | Heatr2                | HEAT repeat containing 2                                                                                    | Cluster0025_Low in some Paneth cells |
| 1440656_at   | Hecw1                 | HECT, C2 and WW domain containing E3 ubiquitin protein ligase 1                                             | Cluster0025_Low in some Paneth cells |
| 1444276_at   | Ict1                  | immature colon carcinoma transcript 1                                                                       | Cluster0025_Low in some Paneth cells |
| 1450613_x_at | Ifnab                 | interferon alpha B                                                                                          | Cluster0025_Low in some Paneth cells |
| 1432781_at   | Intu                  | inturned planar cell polarity effector homolog (Drosophila)                                                 | Cluster0025_Low in some Paneth cells |
| 1441377_at   | Kif6                  | kinesin family member 6                                                                                     | Cluster0025_Low in some Paneth cells |
| 1421316_at   | Lce1g                 | late cornified envelope 1G                                                                                  | Cluster0025_Low in some Paneth cells |
| 1415898_at   | Mgst1                 | microsomal glutathione S-transferase 1                                                                      | Cluster0025_Low in some Paneth cells |
| 1420263_at   | NA                    | ---                                                                                                         | Cluster0025_Low in some Paneth cells |
| 1427818_at   | NA                    | ---                                                                                                         | Cluster0025_Low in some Paneth cells |
| 1441103_at   | NA                    | ---                                                                                                         | Cluster0025_Low in some Paneth cells |
| 1442486_at   | NA                    | ---                                                                                                         | Cluster0025_Low in some Paneth cells |
| 1442627_at   | NA                    | ---                                                                                                         | Cluster0025_Low in some Paneth cells |
| 1442718_at   | NA                    | ---                                                                                                         | Cluster0025_Low in some Paneth cells |
| 1442777_at   | NA                    | ---                                                                                                         | Cluster0025_Low in some Paneth cells |
| 1443009_at   | NA                    | ---                                                                                                         | Cluster0025_Low in some Paneth cells |
| 1443572_at   | NA                    | ---                                                                                                         | Cluster0025_Low in some Paneth cells |
| 1443631_at   | NA                    | ---                                                                                                         | Cluster0025_Low in some Paneth cells |
| 1444608_at   | NA                    | ---                                                                                                         | Cluster0025_Low in some Paneth cells |
| 1444931_at   | NA                    | ---                                                                                                         | Cluster0025_Low in some Paneth cells |
| 1444989_at   | NA                    | ---                                                                                                         | Cluster0025_Low in some Paneth cells |
| 1445015_at   | NA                    | ---                                                                                                         | Cluster0025_Low in some Paneth cells |
| 1445097_at   | NA                    | ---                                                                                                         | Cluster0025_Low in some Paneth cells |
| 1445394_at   | NA                    | ---                                                                                                         | Cluster0025_Low in some Paneth cells |
| 1445567_at   | NA                    | ---                                                                                                         | Cluster0025_Low in some Paneth cells |
| 1445776_at   | NA                    | ---                                                                                                         | Cluster0025_Low in some Paneth cells |
| 1446061_at   | NA                    | ---                                                                                                         | Cluster0025_Low in some Paneth cells |
| 1446668_at   | NA                    | ---                                                                                                         | Cluster0025_Low in some Paneth cells |
| 1447192_at   | NA                    | ---                                                                                                         | Cluster0025_Low in some Paneth cells |
| 1447193_at   | NA                    | ---                                                                                                         | Cluster0025_Low in some Paneth cells |
| 1458030_at   | NA                    | ---                                                                                                         | Cluster0025_Low in some Paneth cells |
| 1458805_at   | NA                    | ---                                                                                                         | Cluster0025_Low in some Paneth cells |
| 1458848_at   | NA                    | ---                                                                                                         | Cluster0025_Low in some Paneth cells |
| 1459163_at   | NA                    | ---                                                                                                         | Cluster0025_Low in some Paneth cells |
| 1459194_at   | NA                    | ---                                                                                                         | Cluster0025_Low in some Paneth cells |
| 1459281_at   | NA                    | ---                                                                                                         | Cluster0025_Low in some Paneth cells |
| 1459506_at   | NA                    | ---                                                                                                         | Cluster0025_Low in some Paneth cells |
| 1460157_at   | NA                    | ---                                                                                                         | Cluster0025_Low in some Paneth cells |
| 1421593_at   | Ncam2                 | neural cell adhesion molecule 2                                                                             | Cluster0025_Low in some Paneth cells |
| 1454098_at   | Olf112                | olfactory receptor 112                                                                                      | Cluster0025_Low in some Paneth cells |

|              |                         |                                                                                |                                           |
|--------------|-------------------------|--------------------------------------------------------------------------------|-------------------------------------------|
| 1422362_s_at | Olfir68 /// Olfir69     | olfactory receptor 68 /// olfactory receptor 69                                | Cluster0025_Low in some Paneth cells      |
| 1436721_x_at | Oog3                    | oogenesis 3                                                                    | Cluster0025_Low in some Paneth cells      |
| 1420260_at   | Phf7                    | PHD finger protein 7                                                           | Cluster0025_Low in some Paneth cells      |
| 1421745_at   | Plag1                   | pleiomorphic adenoma gene 1                                                    | Cluster0025_Low in some Paneth cells      |
| 1447715_x_at | Prdx6-rs1               | peroxiredoxin 6, related sequence 1                                            | Cluster0025_Low in some Paneth cells      |
| 1447737_at   | Prkra                   | protein kinase, interferon inducible double stranded RNA dependent activator   | Cluster0025_Low in some Paneth cells      |
| 1441873_at   | Prl7a1                  | prolactin family 7, subfamily a, member 1                                      | Cluster0025_Low in some Paneth cells      |
| 1441874_x_at | Prl7a1                  | prolactin family 7, subfamily a, member 1                                      | Cluster0025_Low in some Paneth cells      |
| 1419992_x_at | Rab3il1                 | RAB3A interacting protein (rabin3)-like 1                                      | Cluster0025_Low in some Paneth cells      |
| 1447367_at   | Scfd2                   | Sec1 family domain containing 2                                                | Cluster0025_Low in some Paneth cells      |
| 1421782_a_at | Smr2                    | submaxillary gland androgen regulated protein 2                                | Cluster0025_Low in some Paneth cells      |
| 1436621_at   | Srcin1                  | SRC kinase signaling inhibitor 1                                               | Cluster0025_Low in some Paneth cells      |
| 1430695_at   | Tlr4                    | toll-like receptor 4                                                           | Cluster0025_Low in some Paneth cells      |
| 1432550_at   | Tmem190                 | transmembrane protein 190                                                      | Cluster0025_Low in some Paneth cells      |
| 1421607_at   | Vgl11                   | vestigial like 1 homolog (Drosophila)                                          | Cluster0025_Low in some Paneth cells      |
| 1439320_at   | Wscd1                   | WSC domain containing 1                                                        | Cluster0025_Low in some Paneth cells      |
| 1459724_at   | Zdhhc20                 | zinc finger, DHHC domain containing 20                                         | Cluster0025_Low in some Paneth cells      |
| 1429053_at   | 1110012J17Rik           | RIKEN cDNA 1110012J17 gene                                                     | Cluster0026_High in Min 6 & Neuro2A cells |
| 1429729_at   | 1500004A13Rik           | RIKEN cDNA 1500004A13 gene                                                     | Cluster0026_High in Min 6 & Neuro2A cells |
| 1439232_at   | 1500016L03Rik           | RIKEN cDNA 1500016L03 gene                                                     | Cluster0026_High in Min 6 & Neuro2A cells |
| 1453646_at   | 3110005L21Rik           | RIKEN cDNA 3110005L21 gene                                                     | Cluster0026_High in Min 6 & Neuro2A cells |
| 1456421_at   | 4930578M01Rik           | RIKEN cDNA 4930578M01 gene                                                     | Cluster0026_High in Min 6 & Neuro2A cells |
| 1422564_at   | Act16b                  | actin-like 6B                                                                  | Cluster0026_High in Min 6 & Neuro2A cells |
| 1423892_at   | Apbb1                   | amyloid beta (A4) precursor protein-binding, family B, member 1                | Cluster0026_High in Min 6 & Neuro2A cells |
| 1423893_x_at | Apbb1                   | amyloid beta (A4) precursor protein-binding, family B, member 1                | Cluster0026_High in Min 6 & Neuro2A cells |
| 1456837_at   | Asphd1                  | aspartate beta-hydroxylase domain containing 1                                 | Cluster0026_High in Min 6 & Neuro2A cells |
| 1439850_at   | BC066028                | cDNA sequence BC066028                                                         | Cluster0026_High in Min 6 & Neuro2A cells |
| 1458163_at   | BC066028                | cDNA sequence BC066028                                                         | Cluster0026_High in Min 6 & Neuro2A cells |
| 1417388_at   | Bex2                    | brain expressed X-linked 2                                                     | Cluster0026_High in Min 6 & Neuro2A cells |
| 1426929_at   | Celf4                   | CUGBP, Elav-like family member 4                                               | Cluster0026_High in Min 6 & Neuro2A cells |
| 1426930_at   | Celf4                   | CUGBP, Elav-like family member 4                                               | Cluster0026_High in Min 6 & Neuro2A cells |
| 1425067_at   | Celsr3                  | cadherin, EGF LAG seven-pass G-type receptor 3 (flamingo homolog, Drosophila)  | Cluster0026_High in Min 6 & Neuro2A cells |
| 1418810_at   | Crhrl                   | corticotropin releasing hormone receptor 1                                     | Cluster0026_High in Min 6 & Neuro2A cells |
| 1437351_at   | Cxxc4                   | CXXC finger 4                                                                  | Cluster0026_High in Min 6 & Neuro2A cells |
| 1418263_at   | Ddx25                   | DEAD (Asp-Glu-Ala-Asp) box polypeptide 25                                      | Cluster0026_High in Min 6 & Neuro2A cells |
| 1418062_at   | Eef1a2                  | eukaryotic translation elongation factor 1 alpha 2                             | Cluster0026_High in Min 6 & Neuro2A cells |
| 1424306_at   | Elovl4                  | elongation of very long chain fatty acids (FEN1/Elo2, SUR4/Elo3, yeast)-like 4 | Cluster0026_High in Min 6 & Neuro2A cells |
| 1451308_at   | Elovl4                  | elongation of very long chain fatty acids (FEN1/Elo2, SUR4/Elo3, yeast)-like 4 | Cluster0026_High in Min 6 & Neuro2A cells |
| 1418829_a_at | Eno2                    | enolase 2, gamma neuronal                                                      | Cluster0026_High in Min 6 & Neuro2A cells |
| 1436355_at   | Fads6                   | fatty acid desaturase domain family, member 6                                  | Cluster0026_High in Min 6 & Neuro2A cells |
| 1443904_at   | Fads6                   | fatty acid desaturase domain family, member 6                                  | Cluster0026_High in Min 6 & Neuro2A cells |
| 1438706_at   | Fam5b                   | family with sequence similarity 5, member B                                    | Cluster0026_High in Min 6 & Neuro2A cells |
| 1421190_at   | Gabbr3                  | gamma-aminobutyric acid (GABA) A receptor, subunit beta 3                      | Cluster0026_High in Min 6 & Neuro2A cells |
| 1435021_at   | Gabbr3                  | gamma-aminobutyric acid (GABA) A receptor, subunit beta 3                      | Cluster0026_High in Min 6 & Neuro2A cells |
| 1424935_at   | Gdap11                  | ganglioside-induced differentiation-associated protein 1-like 1                | Cluster0026_High in Min 6 & Neuro2A cells |
| 1435245_at   | Gls2                    | glutaminase 2 (liver, mitochondrial)                                           | Cluster0026_High in Min 6 & Neuro2A cells |
| 1424455_at   | Gprasp1                 | G protein-coupled receptor associated sorting protein 1                        | Cluster0026_High in Min 6 & Neuro2A cells |
| 1434073_at   | Gprasp2                 | G protein-coupled receptor associated sorting protein 2                        | Cluster0026_High in Min 6 & Neuro2A cells |
| 1416997_a_at | Hap1                    | huntingtin-associated protein 1                                                | Cluster0026_High in Min 6 & Neuro2A cells |
| 1434913_at   | Hmgcl1                  | 3-hydroxymethyl-3-methylglutaryl-Coenzyme A lyase-like 1                       | Cluster0026_High in Min 6 & Neuro2A cells |
| 1450930_at   | Hpca                    | hippocalcin                                                                    | Cluster0026_High in Min 6 & Neuro2A cells |
| 1436552_at   | Jakmip2                 | janus kinase and microtubule interacting protein 2                             | Cluster0026_High in Min 6 & Neuro2A cells |
| 1418161_at   | Jph3                    | junctophilin 3                                                                 | Cluster0026_High in Min 6 & Neuro2A cells |
| 1451595_a_at | Kcnq2                   | potassium voltage-gated channel, subfamily Q, member 2                         | Cluster0026_High in Min 6 & Neuro2A cells |
| 1455202_at   | LOC100045737 /// Maneal | hypothetical protein LOC100045737 /// mannosidase, endo-alpha-like             | Cluster0026_High in Min 6 & Neuro2A cells |
| 1433536_at   | Lrp11                   | low density lipoprotein receptor-related protein 11                            | Cluster0026_High in Min 6 & Neuro2A cells |
| 1418786_at   | Mapk8ip2                | mitogen-activated protein kinase 8 interacting protein 2                       | Cluster0026_High in Min 6 & Neuro2A cells |



|              |                           |                                                                                                           |                                           |
|--------------|---------------------------|-----------------------------------------------------------------------------------------------------------|-------------------------------------------|
| 1440231_at   | Mtap9                     | microtubule-associated protein 9                                                                          | Cluster0026_High in Min 6 & Neuro2A cells |
| 1441961_at   | Mtap9                     | microtubule-associated protein 9                                                                          | Cluster0026_High in Min 6 & Neuro2A cells |
| 1421175_at   | Myt1l                     | myelin transcription factor 1-like                                                                        | Cluster0026_High in Min 6 & Neuro2A cells |
| 1438412_at   | NA                        | ---                                                                                                       | Cluster0026_High in Min 6 & Neuro2A cells |
| 1439265_at   | NA                        | ---                                                                                                       | Cluster0026_High in Min 6 & Neuro2A cells |
| 1439732_at   | NA                        | ---                                                                                                       | Cluster0026_High in Min 6 & Neuro2A cells |
| 1445479_at   | NA                        | ---                                                                                                       | Cluster0026_High in Min 6 & Neuro2A cells |
| 1447342_at   | NA                        | ---                                                                                                       | Cluster0026_High in Min 6 & Neuro2A cells |
| 1451626_x_at | NA                        | ---                                                                                                       | Cluster0026_High in Min 6 & Neuro2A cells |
| 1457399_at   | NA                        | ---                                                                                                       | Cluster0026_High in Min 6 & Neuro2A cells |
| 1458693_at   | NA                        | ---                                                                                                       | Cluster0026_High in Min 6 & Neuro2A cells |
| 1435961_at   | Nat14                     | N-acetyltransferase 14                                                                                    | Cluster0026_High in Min 6 & Neuro2A cells |
| 1426865_a_at | Ncam1                     | neural cell adhesion molecule 1                                                                           | Cluster0026_High in Min 6 & Neuro2A cells |
| 1456854_at   | Neurl1a                   | neuritized homolog 1A (Drosophila)                                                                        | Cluster0026_High in Min 6 & Neuro2A cells |
| 1418588_at   | Nrsn1                     | neurensin 1                                                                                               | Cluster0026_High in Min 6 & Neuro2A cells |
| 1460214_at   | Pcp4                      | Purkinje cell protein 4                                                                                   | Cluster0026_High in Min 6 & Neuro2A cells |
| 1439618_at   | Pde10a                    | phosphodiesterase 10A                                                                                     | Cluster0026_High in Min 6 & Neuro2A cells |
| 1454999_at   | Phf21b                    | PHD finger protein 21B                                                                                    | Cluster0026_High in Min 6 & Neuro2A cells |
| 1436821_at   | Plcx3                     | phosphatidylinositol-specific phospholipase C, X domain containing 3                                      | Cluster0026_High in Min 6 & Neuro2A cells |
| 1437018_at   | Pnma2                     | paraneoplastic antigen MA2                                                                                | Cluster0026_High in Min 6 & Neuro2A cells |
| 1439289_s_at | Pnma1                     | PNMA-like 1                                                                                               | Cluster0026_High in Min 6 & Neuro2A cells |
| 1456856_at   | Ppfia2                    | protein tyrosine phosphatase, receptor type, f polypeptide (PTPRF), interacting protein (liprin), alpha 2 | Cluster0026_High in Min 6 & Neuro2A cells |
| 1416753_at   | Prkar1b                   | protein kinase, cAMP dependent regulatory, type I beta                                                    | Cluster0026_High in Min 6 & Neuro2A cells |
| 1416754_at   | Prkar1b                   | protein kinase, cAMP dependent regulatory, type I beta                                                    | Cluster0026_High in Min 6 & Neuro2A cells |
| 1434325_x_at | Prkar1b                   | protein kinase, cAMP dependent regulatory, type I beta                                                    | Cluster0026_High in Min 6 & Neuro2A cells |
| 1440132_s_at | Prkar1b                   | protein kinase, cAMP dependent regulatory, type I beta                                                    | Cluster0026_High in Min 6 & Neuro2A cells |
| 1440133_x_at | Prkar1b                   | protein kinase, cAMP dependent regulatory, type I beta                                                    | Cluster0026_High in Min 6 & Neuro2A cells |
| 1439274_at   | Prune2                    | prune homolog 2 (Drosophila)                                                                              | Cluster0026_High in Min 6 & Neuro2A cells |
| 1455342_at   | Prune2                    | prune homolog 2 (Drosophila)                                                                              | Cluster0026_High in Min 6 & Neuro2A cells |
| 1435014_at   | Rab39b                    | RAB39B, member RAS oncogene family                                                                        | Cluster0026_High in Min 6 & Neuro2A cells |
| 1453246_at   | Rab39b                    | RAB39B, member RAS oncogene family                                                                        | Cluster0026_High in Min 6 & Neuro2A cells |
| 1424386_at   | Reep2                     | receptor accessory protein 2                                                                              | Cluster0026_High in Min 6 & Neuro2A cells |
| 1422809_at   | Rims2                     | regulating synaptic membrane exocytosis 2                                                                 | Cluster0026_High in Min 6 & Neuro2A cells |
| 1436470_at   | Rims2                     | regulating synaptic membrane exocytosis 2                                                                 | Cluster0026_High in Min 6 & Neuro2A cells |
| 1450761_s_at | Rims2                     | regulating synaptic membrane exocytosis 2                                                                 | Cluster0026_High in Min 6 & Neuro2A cells |
| 1435971_at   | Rims3                     | regulating synaptic membrane exocytosis 3                                                                 | Cluster0026_High in Min 6 & Neuro2A cells |
| 1436408_at   | Rprml                     | reprimin-like                                                                                             | Cluster0026_High in Min 6 & Neuro2A cells |
| 1424403_a_at | Rufy3                     | RUN and FYVE domain containing 3                                                                          | Cluster0026_High in Min 6 & Neuro2A cells |
| 1442786_s_at | Rufy3                     | RUN and FYVE domain containing 3                                                                          | Cluster0026_High in Min 6 & Neuro2A cells |
| 1455027_at   | Rufy3                     | RUN and FYVE domain containing 3                                                                          | Cluster0026_High in Min 6 & Neuro2A cells |
| 1449246_at   | Rundc3a                   | RUN domain containing 3A                                                                                  | Cluster0026_High in Min 6 & Neuro2A cells |
| 1442810_x_at | Scn9a                     | sodium channel, voltage-gated, type IX, alpha                                                             | Cluster0026_High in Min 6 & Neuro2A cells |
| 1425180_at   | Sgip1                     | SH3-domain GRB2-like (endophilin) interacting protein 1                                                   | Cluster0026_High in Min 6 & Neuro2A cells |
| 1416828_at   | Snap25                    | synaptosomal-associated protein 25                                                                        | Cluster0026_High in Min 6 & Neuro2A cells |
| 1416688_at   | Snap91                    | synaptosomal-associated protein 91                                                                        | Cluster0026_High in Min 6 & Neuro2A cells |
| 1427542_at   | Sobp                      | sine oculis-binding protein homolog (Drosophila)                                                          | Cluster0026_High in Min 6 & Neuro2A cells |
| 1457087_at   | Srrm3                     | serine/arginine repetitive matrix 3                                                                       | Cluster0026_High in Min 6 & Neuro2A cells |
| 1451008_at   | St8sia3                   | ST8 alpha-N-acetyl-neuraminide alpha-2,8-sialyltransferase 3                                              | Cluster0026_High in Min 6 & Neuro2A cells |
| 1435113_x_at | Stmn3                     | stathmin-like 3                                                                                           | Cluster0026_High in Min 6 & Neuro2A cells |
| 1460181_at   | Stmn3                     | stathmin-like 3                                                                                           | Cluster0026_High in Min 6 & Neuro2A cells |
| 1452663_at   | Svop                      | SV2 related protein                                                                                       | Cluster0026_High in Min 6 & Neuro2A cells |
| 1416098_at   | Syng3                     | synaptogyrin 3                                                                                            | Cluster0026_High in Min 6 & Neuro2A cells |
| 1448216_at   | Syng3                     | synaptogyrin 3                                                                                            | Cluster0026_High in Min 6 & Neuro2A cells |
| 1436916_at   | Tmem108                   | transmembrane protein 108                                                                                 | Cluster0026_High in Min 6 & Neuro2A cells |
| 1437472_at   | Unc13a                    | unc-13 homolog A (C. elegans)                                                                             | Cluster0026_High in Min 6 & Neuro2A cells |
| 1436094_at   | Vgf                       | VGF nerve growth factor inducible                                                                         | Cluster0026_High in Min 6 & Neuro2A cells |
| 1420357_s_at | Xlr3a /// Xlr3b /// Xlr3c | X-linked lymphocyte-regulated 3A /// X-linked lymphocyte-regulated 3B /// X-linked lymphocyte-regulated   | Cluster0026_High in Min 6 & Neuro2A cells |

|              |               |                                                                  |                                           |
|--------------|---------------|------------------------------------------------------------------|-------------------------------------------|
| 1456783_at   | Zdbf2         | zinc finger, DBF-type containing 2                               | Cluster0026_High in Min 6 & Neuro2A cells |
| 1430557_at   | 4930434J08Rik | RIKEN cDNA 4930434J08 gene                                       | Cluster0027_Astrocyte-related             |
| 1456798_at   | 9330118A15Rik | RIKEN cDNA 9330118A15 gene                                       | Cluster0027_Astrocyte-related             |
| 1434818_at   | 9330159K06    | hypothetical protein 9330159K06                                  | Cluster0027_Astrocyte-related             |
| 1454551_at   | 9530034D02Rik | RIKEN cDNA 9530034D02 gene                                       | Cluster0027_Astrocyte-related             |
| 1420796_at   | Ahrr          | aryl-hydrocarbon receptor repressor                              | Cluster0027_Astrocyte-related             |
| 1434052_at   | AI593442      | expressed sequence AI593442                                      | Cluster0027_Astrocyte-related             |
| 1444026_at   | AI593442      | expressed sequence AI593442                                      | Cluster0027_Astrocyte-related             |
| 1417784_at   | Als2          | amyotrophic lateral sclerosis 2 (juvenile) homolog (human)       | Cluster0027_Astrocyte-related             |
| 1424011_at   | Aqp9          | aquaporin 9                                                      | Cluster0027_Astrocyte-related             |
| 1417704_a_at | Arhgap6       | Rho GTPase activating protein 6                                  | Cluster0027_Astrocyte-related             |
| 1451867_x_at | Arhgap6       | Rho GTPase activating protein 6                                  | Cluster0027_Astrocyte-related             |
| 1456333_a_at | Arhgap6       | Rho GTPase activating protein 6                                  | Cluster0027_Astrocyte-related             |
| 1441151_at   | AU044157      | expressed sequence AU044157                                      | Cluster0027_Astrocyte-related             |
| 1430170_at   | Bbs10         | Bardet-Biedl syndrome 10 (human)                                 | Cluster0027_Astrocyte-related             |
| 1440787_s_at | Bbs10         | Bardet-Biedl syndrome 10 (human)                                 | Cluster0027_Astrocyte-related             |
| 1437650_at   | C730026J16    | hypothetical protein C730026J16                                  | Cluster0027_Astrocyte-related             |
| 1460066_at   | C80889        | expressed sequence C80889                                        | Cluster0027_Astrocyte-related             |
| 1427482_a_at | Car8          | carbonic anhydrase 8                                             | Cluster0027_Astrocyte-related             |
| 1457904_at   | Car8          | carbonic anhydrase 8                                             | Cluster0027_Astrocyte-related             |
| 1430645_at   | Cd200r3       | CD200 receptor 3                                                 | Cluster0027_Astrocyte-related             |
| 1428573_at   | Chn2          | chimerin (chimaerin) 2                                           | Cluster0027_Astrocyte-related             |
| 1450237_at   | Dnase2b       | deoxyribonuclease II beta                                        | Cluster0027_Astrocyte-related             |
| 1436624_at   | Dnm3          | dynamin 3                                                        | Cluster0027_Astrocyte-related             |
| 1436875_at   | Dnm3          | dynamin 3                                                        | Cluster0027_Astrocyte-related             |
| 1439860_at   | Eef2k         | eukaryotic elongation factor-2 kinase                            | Cluster0027_Astrocyte-related             |
| 1441250_at   | Enthd1        | ENTH domain containing 1                                         | Cluster0027_Astrocyte-related             |
| 1419029_at   | Ero1l         | ERO1-like (S. cerevisiae)                                        | Cluster0027_Astrocyte-related             |
| 1449324_at   | Ero1l         | ERO1-like (S. cerevisiae)                                        | Cluster0027_Astrocyte-related             |
| 1457589_at   | Fat3          | FAT tumor suppressor homolog 3 (Drosophila)                      | Cluster0027_Astrocyte-related             |
| 1435189_at   | Frpm1         | FERM and PDZ domain containing 1                                 | Cluster0027_Astrocyte-related             |
| 1455599_at   | Gfod1         | glucose-fructose oxidoreductase domain containing 1              | Cluster0027_Astrocyte-related             |
| 1453354_at   | Gm11602       | predicted gene 11602                                             | Cluster0027_Astrocyte-related             |
| 1436110_at   | Homer2        | homer homolog 2 (Drosophila)                                     | Cluster0027_Astrocyte-related             |
| 1420939_at   | Hs6st2        | heparan sulfate 6-O-sulfotransferase 2                           | Cluster0027_Astrocyte-related             |
| 1446257_at   | Hs6st2        | heparan sulfate 6-O-sulfotransferase 2                           | Cluster0027_Astrocyte-related             |
| 1433894_at   | Jazf1         | JAZF zinc finger 1                                               | Cluster0027_Astrocyte-related             |
| 1447846_x_at | Mboat7        | membrane bound O-acyltransferase domain containing 7             | Cluster0027_Astrocyte-related             |
| 1451066_at   | Mboat7        | membrane bound O-acyltransferase domain containing 7             | Cluster0027_Astrocyte-related             |
| 1435393_at   | Mc1r          | melanocortin 1 receptor                                          | Cluster0027_Astrocyte-related             |
| 1449989_at   | Mcpt2         | mast cell protease 2                                             | Cluster0027_Astrocyte-related             |
| 1441546_at   | Mpp6          | Membrane protein, palmitoylated 6 (MAGUK p55 subfamily member 6) | Cluster0027_Astrocyte-related             |
| 1437529_at   | Mrgprb1       | MAS-related GPR, member B1                                       | Cluster0027_Astrocyte-related             |
| 1435268_at   | NA            | ---                                                              | Cluster0027_Astrocyte-related             |
| 1440490_at   | NA            | ---                                                              | Cluster0027_Astrocyte-related             |
| 1441425_at   | NA            | ---                                                              | Cluster0027_Astrocyte-related             |
| 1441765_at   | NA            | ---                                                              | Cluster0027_Astrocyte-related             |
| 1442183_at   | NA            | ---                                                              | Cluster0027_Astrocyte-related             |
| 1442813_at   | NA            | ---                                                              | Cluster0027_Astrocyte-related             |
| 1444384_at   | NA            | ---                                                              | Cluster0027_Astrocyte-related             |
| 1444527_at   | NA            | ---                                                              | Cluster0027_Astrocyte-related             |
| 1445540_at   | NA            | ---                                                              | Cluster0027_Astrocyte-related             |
| 1445902_at   | NA            | ---                                                              | Cluster0027_Astrocyte-related             |
| 1446175_at   | NA            | ---                                                              | Cluster0027_Astrocyte-related             |
| 1446451_at   | NA            | ---                                                              | Cluster0027_Astrocyte-related             |
| 1446694_at   | NA            | ---                                                              | Cluster0027_Astrocyte-related             |
| 1447835_at   | NA            | ---                                                              | Cluster0027_Astrocyte-related             |

|              |               |                                                          |                                       |
|--------------|---------------|----------------------------------------------------------|---------------------------------------|
| 1447906_at   | NA            | ---                                                      | Cluster0027_Astrocyte-related         |
| 1449594_at   | NA            | ---                                                      | Cluster0027_Astrocyte-related         |
| 1459091_at   | NA            | ---                                                      | Cluster0027_Astrocyte-related         |
| 1448954_at   | Nrip3         | nuclear receptor interacting protein 3                   | Cluster0027_Astrocyte-related         |
| 1438448_at   | Otop1         | otopetrin 1                                              | Cluster0027_Astrocyte-related         |
| 1429794_a_at | P2rx1         | purinergic receptor P2X, ligand-gated ion channel, 1     | Cluster0027_Astrocyte-related         |
| 1418715_at   | Pank1         | pantothenate kinase 1                                    | Cluster0027_Astrocyte-related         |
| 1431028_a_at | Pank1         | pantothenate kinase 1                                    | Cluster0027_Astrocyte-related         |
| 1458721_at   | Pcdhg@        | Protocadherin gamma cluster                              | Cluster0027_Astrocyte-related         |
| 1444386_at   | Pde1c         | phosphodiesterase 1C                                     | Cluster0027_Astrocyte-related         |
| 1457824_at   | Plscr1        | phospholipid scramblase 1                                | Cluster0027_Astrocyte-related         |
| 1423478_at   | Prkcb         | protein kinase C, beta                                   | Cluster0027_Astrocyte-related         |
| 1460419_a_at | Prkcb         | protein kinase C, beta                                   | Cluster0027_Astrocyte-related         |
| 1453129_a_at | Rgs12         | regulator of G-protein signaling 12                      | Cluster0027_Astrocyte-related         |
| 1457511_at   | Rgs12         | regulator of G-protein signaling 12                      | Cluster0027_Astrocyte-related         |
| 1449856_at   | Rgs18         | regulator of G-protein signaling 18                      | Cluster0027_Astrocyte-related         |
| 1422864_at   | Runx1         | runt related transcription factor 1                      | Cluster0027_Astrocyte-related         |
| 1440878_at   | Runx1         | runt related transcription factor 1                      | Cluster0027_Astrocyte-related         |
| 1427427_at   | Ryr3          | ryanodine receptor 3                                     | Cluster0027_Astrocyte-related         |
| 1420784_at   | Scn11a        | sodium channel, voltage-gated, type XI, alpha            | Cluster0027_Astrocyte-related         |
| 1456764_at   | Slc35f3       | solute carrier family 35, member F3                      | Cluster0027_Astrocyte-related         |
| 1423160_at   | Spred1        | sprouty protein with EVH-1 domain 1, related sequence    | Cluster0027_Astrocyte-related         |
| 1423162_s_at | Spred1        | sprouty protein with EVH-1 domain 1, related sequence    | Cluster0027_Astrocyte-related         |
| 1445228_at   | Spred1        | Sprouty protein with EVH-1 domain 1, related sequence    | Cluster0027_Astrocyte-related         |
| 1453021_at   | Stxbp5        | syntaxin binding protein 5 (tomosyn)                     | Cluster0027_Astrocyte-related         |
| 1450272_at   | Tnfsf8        | tumor necrosis factor (ligand) superfamily, member 8     | Cluster0027_Astrocyte-related         |
| 1426175_a_at | Tpsab1        | tryptase alpha/beta 1                                    | Cluster0027_Astrocyte-related         |
| 1451802_at   | Tpsb2         | tryptase beta 2                                          | Cluster0027_Astrocyte-related         |
| 1426486_at   | Ubxn4         | UBX domain protein 4                                     | Cluster0027_Astrocyte-related         |
| 1451276_at   | Uhrf1bp1l     | UHRF1 (ICBP90) binding protein 1-like                    | Cluster0027_Astrocyte-related         |
| 1417779_at   | 2310079N02Rik | RIKEN cDNA 2310079N02 gene                               | Cluster0028_High in Peyer's patch FDC |
| 1430252_at   | 3110027N22Rik | RIKEN cDNA 3110027N22 gene                               | Cluster0028_High in Peyer's patch FDC |
| 1444758_at   | 4930595D18Rik | RIKEN cDNA 4930595D18 gene                               | Cluster0028_High in Peyer's patch FDC |
| 1432946_at   | 5230400M06Rik | RIKEN cDNA 5230400M06 gene                               | Cluster0028_High in Peyer's patch FDC |
| 1429900_at   | 5330406M23Rik | RIKEN cDNA 5330406M23 gene                               | Cluster0028_High in Peyer's patch FDC |
| 1431374_at   | 6330407A03Rik | RIKEN cDNA 6330407A03 gene                               | Cluster0028_High in Peyer's patch FDC |
| 1441669_at   | Acap2         | ArfGAP with coiled-coil, ankyrin repeat and PH domains 2 | Cluster0028_High in Peyer's patch FDC |
| 1449395_at   | Ankrd61       | ankyrin repeat domain 61                                 | Cluster0028_High in Peyer's patch FDC |
| 1423008_at   | Art2a         | ADP-ribosyltransferase 2a                                | Cluster0028_High in Peyer's patch FDC |
| 1439819_at   | AU015263      | expressed sequence AU015263                              | Cluster0028_High in Peyer's patch FDC |
| 1457761_at   | C79607        | expressed sequence C79607                                | Cluster0028_High in Peyer's patch FDC |
| 1441534_at   | C86753        | expressed sequence C86753                                | Cluster0028_High in Peyer's patch FDC |
| 1419627_s_at | Clec4n        | C-type lectin domain family 4, member n                  | Cluster0028_High in Peyer's patch FDC |
| 1456887_at   | Cmklr1        | chemokine-like receptor 1                                | Cluster0028_High in Peyer's patch FDC |
| 1442576_at   | Creb5         | cAMP responsive element binding protein 5                | Cluster0028_High in Peyer's patch FDC |
| 1440451_at   | D730048J04Rik | RIKEN cDNA D730048J04 gene                               | Cluster0028_High in Peyer's patch FDC |
| 1457180_at   | Dip2c         | DIP2 disco-interacting protein 2 homolog C (Drosophila)  | Cluster0028_High in Peyer's patch FDC |
| 1441462_at   | Dock4         | dedicator of cytokinesis 4                               | Cluster0028_High in Peyer's patch FDC |
| 1457146_at   | Dock4         | dedicator of cytokinesis 4                               | Cluster0028_High in Peyer's patch FDC |
| 1458459_a_at | E230029C05Rik | RIKEN cDNA E230029C05 gene                               | Cluster0028_High in Peyer's patch FDC |
| 1425295_at   | Ear11         | eosinophil-associated, ribonuclease A family, member 11  | Cluster0028_High in Peyer's patch FDC |
| 1434580_at   | Enpp4         | ectonucleotide pyrophosphatase/phosphodiesterase 4       | Cluster0028_High in Peyer's patch FDC |
| 1453977_at   | Exoc4         | exocyst complex component 4                              | Cluster0028_High in Peyer's patch FDC |
| 1426594_at   | Frm4b         | FERM domain containing 4B                                | Cluster0028_High in Peyer's patch FDC |
| 1438169_a_at | Frm4b         | FERM domain containing 4B                                | Cluster0028_High in Peyer's patch FDC |
| 1441548_at   | Frm4b         | FERM domain containing 4B                                | Cluster0028_High in Peyer's patch FDC |
| 1452123_s_at | Frm4b         | FERM domain containing 4B                                | Cluster0028_High in Peyer's patch FDC |

|              |                   |                                                                                                         |                                       |
|--------------|-------------------|---------------------------------------------------------------------------------------------------------|---------------------------------------|
| 1421596_s_at | H28               | histocompatibility 28                                                                                   | Cluster0028_High in Peyer's patch FDC |
| 1425917_at   | H28               | histocompatibility 28                                                                                   | Cluster0028_High in Peyer's patch FDC |
| 1422891_at   | H2-Ea             | histocompatibility 2, class II antigen E alpha                                                          | Cluster0028_High in Peyer's patch FDC |
| 1422892_s_at | H2-Ea             | histocompatibility 2, class II antigen E alpha                                                          | Cluster0028_High in Peyer's patch FDC |
| 1418645_at   | Hal               | histidine ammonia lyase                                                                                 | Cluster0028_High in Peyer's patch FDC |
| 1452388_at   | Hspa1a            | heat shock protein 1A                                                                                   | Cluster0028_High in Peyer's patch FDC |
| 1427126_at   | Hspa1b            | heat shock protein 1B                                                                                   | Cluster0028_High in Peyer's patch FDC |
| 1427127_x_at | Hspa1b            | heat shock protein 1B                                                                                   | Cluster0028_High in Peyer's patch FDC |
| 1452318_a_at | Hspa1b            | heat shock protein 1B                                                                                   | Cluster0028_High in Peyer's patch FDC |
| 1423555_a_at | Ifi44             | interferon-induced protein 44                                                                           | Cluster0028_High in Peyer's patch FDC |
| 1420860_at   | Itga9             | integrin alpha 9                                                                                        | Cluster0028_High in Peyer's patch FDC |
| 1450029_s_at | Itga9             | integrin alpha 9                                                                                        | Cluster0028_High in Peyer's patch FDC |
| 1460285_at   | Itga9             | integrin alpha 9                                                                                        | Cluster0028_High in Peyer's patch FDC |
| 1435645_at   | LOC676546 /// Mmd | similar to monocyte to macrophage differentiation-associated /// monocyte to macrophage differentiation | Cluster0028_High in Peyer's patch FDC |
| 1440684_at   | Lpcat2            | lysophosphatidylcholine acyltransferase 2                                                               | Cluster0028_High in Peyer's patch FDC |
| 1451716_at   | Mafb              | v-maf musculoaponeurotic fibrosarcoma oncogene family, protein B (avian)                                | Cluster0028_High in Peyer's patch FDC |
| 1454119_at   | Mknk1             | MAP kinase-interacting serine/threonine kinase 1                                                        | Cluster0028_High in Peyer's patch FDC |
| 1420286_at   | NA                | ---                                                                                                     | Cluster0028_High in Peyer's patch FDC |
| 1425583_at   | NA                | ---                                                                                                     | Cluster0028_High in Peyer's patch FDC |
| 1425584_x_at | NA                | ---                                                                                                     | Cluster0028_High in Peyer's patch FDC |
| 1436259_at   | NA                | ---                                                                                                     | Cluster0028_High in Peyer's patch FDC |
| 1440662_at   | NA                | ---                                                                                                     | Cluster0028_High in Peyer's patch FDC |
| 1441567_at   | NA                | ---                                                                                                     | Cluster0028_High in Peyer's patch FDC |
| 1441726_at   | NA                | ---                                                                                                     | Cluster0028_High in Peyer's patch FDC |
| 1442049_at   | NA                | ---                                                                                                     | Cluster0028_High in Peyer's patch FDC |
| 1442760_x_at | NA                | ---                                                                                                     | Cluster0028_High in Peyer's patch FDC |
| 1443208_at   | NA                | ---                                                                                                     | Cluster0028_High in Peyer's patch FDC |
| 1444411_at   | NA                | ---                                                                                                     | Cluster0028_High in Peyer's patch FDC |
| 1444862_at   | NA                | ---                                                                                                     | Cluster0028_High in Peyer's patch FDC |
| 1445500_at   | NA                | ---                                                                                                     | Cluster0028_High in Peyer's patch FDC |
| 1445831_at   | NA                | ---                                                                                                     | Cluster0028_High in Peyer's patch FDC |
| 1447348_at   | NA                | ---                                                                                                     | Cluster0028_High in Peyer's patch FDC |
| 1447560_at   | NA                | ---                                                                                                     | Cluster0028_High in Peyer's patch FDC |
| 1452408_at   | NA                | ---                                                                                                     | Cluster0028_High in Peyer's patch FDC |
| 1457483_at   | NA                | ---                                                                                                     | Cluster0028_High in Peyer's patch FDC |
| 1457489_at   | NA                | ---                                                                                                     | Cluster0028_High in Peyer's patch FDC |
| 1457952_at   | NA                | ---                                                                                                     | Cluster0028_High in Peyer's patch FDC |
| 1458159_at   | NA                | ---                                                                                                     | Cluster0028_High in Peyer's patch FDC |
| 1458781_at   | NA                | ---                                                                                                     | Cluster0028_High in Peyer's patch FDC |
| 1459668_at   | NA                | ---                                                                                                     | Cluster0028_High in Peyer's patch FDC |
| 1459670_at   | NA                | ---                                                                                                     | Cluster0028_High in Peyer's patch FDC |
| 1460096_at   | NA                | ---                                                                                                     | Cluster0028_High in Peyer's patch FDC |
| 1443266_at   | Npc2              | Niemann Pick type C2                                                                                    | Cluster0028_High in Peyer's patch FDC |
| 1431724_a_at | P2ry12            | purinergic receptor P2Y, G-protein coupled 12                                                           | Cluster0028_High in Peyer's patch FDC |
| 1428700_at   | P2ry13            | purinergic receptor P2Y, G-protein coupled 13                                                           | Cluster0028_High in Peyer's patch FDC |
| 1429831_at   | Pik3ap1           | phosphoinositide-3-kinase adaptor protein 1                                                             | Cluster0028_High in Peyer's patch FDC |
| 1448060_at   | Sema6d            | sema domain, transmembrane domain (TM), and cytoplasmic domain, (semaphorin) 6D                         | Cluster0028_High in Peyer's patch FDC |
| 1446509_at   | Smox              | spermine oxidase                                                                                        | Cluster0028_High in Peyer's patch FDC |
| 1440344_at   | Snord89           | small nucleolar RNA, C/D box 89                                                                         | Cluster0028_High in Peyer's patch FDC |
| 1424415_s_at | Spon1             | spondin 1, (f-spondin) extracellular matrix protein                                                     | Cluster0028_High in Peyer's patch FDC |
| 1442613_at   | Spon1             | spondin 1, (f-spondin) extracellular matrix protein                                                     | Cluster0028_High in Peyer's patch FDC |
| 1438329_at   | Tlr12             | toll-like receptor 12                                                                                   | Cluster0028_High in Peyer's patch FDC |
| 1434583_at   | Tmem26            | transmembrane protein 26                                                                                | Cluster0028_High in Peyer's patch FDC |
| 1435409_at   | Tmem26            | transmembrane protein 26                                                                                | Cluster0028_High in Peyer's patch FDC |
| 1436225_at   | Trpm2             | transient receptor potential cation channel, subfamily M, member 2                                      | Cluster0028_High in Peyer's patch FDC |
| 1455551_at   | Uevld             | UEV and lactate/malate dehydrogenase domains                                                            | Cluster0028_High in Peyer's patch FDC |
| 1434483_at   | Usp12             | ubiquitin specific peptidase 12                                                                         | Cluster0028_High in Peyer's patch FDC |

|                     |                           |                                                                                   |                                           |
|---------------------|---------------------------|-----------------------------------------------------------------------------------|-------------------------------------------|
| 1442112_at          | Vps18                     | vacuolar protein sorting 18 (yeast)                                               | Cluster0028_High in Peyer's patch FDC     |
| 1460056_at          | 1700109F18Rik             | RIKEN cDNA 1700109F18 gene                                                        | Cluster0029_Lymphatic endothelium-related |
| 1433837_at          | 8430408G22Rik             | RIKEN cDNA 8430408G22 gene                                                        | Cluster0029_Lymphatic endothelium-related |
| 1418098_at          | Adcy4                     | adenylate cyclase 4                                                               | Cluster0029_Lymphatic endothelium-related |
| 1451038_at          | Apln                      | apelin                                                                            | Cluster0029_Lymphatic endothelium-related |
| 1457172_at          | Arhgef15                  | Rho guanine nucleotide exchange factor (GEF) 15                                   | Cluster0029_Lymphatic endothelium-related |
| 1440358_at          | Arhgef15 /// LOC100045735 | Rho guanine nucleotide exchange factor (GEF) 15 /// similar to Arhgef15 protein   | Cluster0029_Lymphatic endothelium-related |
| 1455522_at          | Arhgef15 /// LOC100045735 | Rho guanine nucleotide exchange factor (GEF) 15 /// similar to Arhgef15 protein   | Cluster0029_Lymphatic endothelium-related |
| 1435600_s_at        | BC020535                  | cDNA sequence BC020535                                                            | Cluster0029_Lymphatic endothelium-related |
| 1418421_at          | Bcl6b                     | B-cell CLL/lymphoma 6, member B                                                   | Cluster0029_Lymphatic endothelium-related |
| 1425175_at          | C1qI3                     | C1q-like 3                                                                        | Cluster0029_Lymphatic endothelium-related |
| 1425176_at          | C1qI3                     | C1q-like 3                                                                        | Cluster0029_Lymphatic endothelium-related |
| 1451620_at          | C1qI3                     | C1q-like 3                                                                        | Cluster0029_Lymphatic endothelium-related |
| 1454015_a_at        | Cdh13                     | cadherin 13                                                                       | Cluster0029_Lymphatic endothelium-related |
| 1433956_at          | Cdh5                      | cadherin 5                                                                        | Cluster0029_Lymphatic endothelium-related |
| 1421158_at          | Cgnl1                     | cingulin-like 1                                                                   | Cluster0029_Lymphatic endothelium-related |
| 1448052_at          | Cgnl1                     | cingulin-like 1                                                                   | Cluster0029_Lymphatic endothelium-related |
| 1452309_at          | Cgnl1                     | cingulin-like 1                                                                   | Cluster0029_Lymphatic endothelium-related |
| 1449227_at          | Ch25h                     | cholesterol 25-hydroxylase                                                        | Cluster0029_Lymphatic endothelium-related |
| 1419793_at          | D5Ert615e                 | DNA segment, Chr 5, ERATO Doi 615, expressed                                      | Cluster0029_Lymphatic endothelium-related |
| 1422127_at          | Dhh                       | desert hedgehog                                                                   | Cluster0029_Lymphatic endothelium-related |
| 1434959_at          | Dhh                       | desert hedgehog                                                                   | Cluster0029_Lymphatic endothelium-related |
| 1451891_a_at        | Dysf                      | dysferlin                                                                         | Cluster0029_Lymphatic endothelium-related |
| 1460356_at          | Esam                      | endothelial cell-specific adhesion molecule                                       | Cluster0029_Lymphatic endothelium-related |
| 1436536_at          | Exoc3l                    | exocyst complex component 3-like                                                  | Cluster0029_Lymphatic endothelium-related |
| 1428867_at          | Exoc3l2                   | exocyst complex component 3-like 2                                                | Cluster0029_Lymphatic endothelium-related |
| 1421288_at          | F2rI3                     | coagulation factor II (thrombin) receptor-like 3                                  | Cluster0029_Lymphatic endothelium-related |
| 1449558_at          | F8                        | coagulation factor VIII                                                           | Cluster0029_Lymphatic endothelium-related |
| 1455587_at          | Fam167b                   | family with sequence similarity 167, member B                                     | Cluster0029_Lymphatic endothelium-related |
| 1420806_at          | Fgf16                     | fibroblast growth factor 16                                                       | Cluster0029_Lymphatic endothelium-related |
| 1429993_s_at        | Gm10471 /// Speer4b       | predicted gene 10471 /// spermatogenesis associated glutamate (E)-rich protein 4b | Cluster0029_Lymphatic endothelium-related |
| 1440830_at          | Gpr116                    | G protein-coupled receptor 116                                                    | Cluster0029_Lymphatic endothelium-related |
| 1453708_a_at        | Gsto2                     | glutathione S-transferase omega 2                                                 | Cluster0029_Lymphatic endothelium-related |
| 1438532_at          | Hmcn1                     | hemicentin 1                                                                      | Cluster0029_Lymphatic endothelium-related |
| 1450209_at          | Hoxd4                     | homeobox D4                                                                       | Cluster0029_Lymphatic endothelium-related |
| 1431099_at          | Hoxd8                     | homeobox D8                                                                       | Cluster0029_Lymphatic endothelium-related |
| 1419126_at          | Hoxd9                     | homeobox D9                                                                       | Cluster0029_Lymphatic endothelium-related |
| 1426181_a_at        | Il24                      | interleukin 24                                                                    | Cluster0029_Lymphatic endothelium-related |
| 1448839_at          | Kank3                     | KN motif and ankyrin repeat domains 3                                             | Cluster0029_Lymphatic endothelium-related |
| 1456629_at          | Kank3                     | KN motif and ankyrin repeat domains 3                                             | Cluster0029_Lymphatic endothelium-related |
| 1449379_at          | Kdr                       | kinase insert domain protein receptor                                             | Cluster0029_Lymphatic endothelium-related |
| 1451245_at          | Lrrc3b                    | leucine rich repeat containing 3B                                                 | Cluster0029_Lymphatic endothelium-related |
| 1419340_at          | Mov10l1                   | Moloney leukemia virus 10-like 1                                                  | Cluster0029_Lymphatic endothelium-related |
| 1452072_at          | Myct1                     | myc target 1                                                                      | Cluster0029_Lymphatic endothelium-related |
| 1434585_at          | NA                        | ---                                                                               | Cluster0029_Lymphatic endothelium-related |
| 1447996_at          | NA                        | ---                                                                               | Cluster0029_Lymphatic endothelium-related |
| AFFX-r2-Bs-lys-3_at | NA                        | ---                                                                               | Cluster0029_Lymphatic endothelium-related |
| AFFX-r2-Bs-lys-M_at | NA                        | ---                                                                               | Cluster0029_Lymphatic endothelium-related |
| 1422622_at          | Nos3                      | nitric oxide synthase 3, endothelial cell                                         | Cluster0029_Lymphatic endothelium-related |
| 1449146_at          | Notch4                    | Notch gene homolog 4 (Drosophila)                                                 | Cluster0029_Lymphatic endothelium-related |
| 1450791_at          | Nppb                      | natriuretic peptide precursor type B                                              | Cluster0029_Lymphatic endothelium-related |
| 1422130_at          | Nptx1                     | neuronal pentraxin 1                                                              | Cluster0029_Lymphatic endothelium-related |
| 1434877_at          | Nptx1                     | neuronal pentraxin 1                                                              | Cluster0029_Lymphatic endothelium-related |
| 1424793_a_at        | Pbp2                      | phosphatidylethanolamine binding protein 2                                        | Cluster0029_Lymphatic endothelium-related |
| 1450765_a_at        | Pde6h                     | phosphodiesterase 6H, cGMP-specific, cone, gamma                                  | Cluster0029_Lymphatic endothelium-related |
| 1450766_at          | Pde6h                     | phosphodiesterase 6H, cGMP-specific, cone, gamma                                  | Cluster0029_Lymphatic endothelium-related |
| 1421287_a_at        | Pecam1                    | platelet/endothelial cell adhesion molecule 1                                     | Cluster0029_Lymphatic endothelium-related |

|              |                                      |                                                                                                             |                                           |
|--------------|--------------------------------------|-------------------------------------------------------------------------------------------------------------|-------------------------------------------|
| 1418471_at   | Pgf                                  | placental growth factor                                                                                     | Cluster0029_Lymphatic endothelium-related |
| 1434525_at   | Pkn3                                 | protein kinase N3                                                                                           | Cluster0029_Lymphatic endothelium-related |
| 1430631_at   | Ppm1f                                | protein phosphatase 1F (PP2C domain containing)                                                             | Cluster0029_Lymphatic endothelium-related |
| 1432047_at   | Prex2                                | phosphatidylinositol-3,4,5-trisphosphate-dependent Rac exchange factor 2                                    | Cluster0029_Lymphatic endothelium-related |
| 1420664_s_at | Procr                                | protein C receptor, endothelial                                                                             | Cluster0029_Lymphatic endothelium-related |
| 1453908_at   | Ptprb                                | protein tyrosine phosphatase, receptor type, B                                                              | Cluster0029_Lymphatic endothelium-related |
| 1422541_at   | Ptpnm                                | protein tyrosine phosphatase, receptor type, M                                                              | Cluster0029_Lymphatic endothelium-related |
| 1418187_at   | Ramp2                                | receptor (calcitonin) activity modifying protein 2                                                          | Cluster0029_Lymphatic endothelium-related |
| 1428016_a_at | Rasip1                               | Ras interacting protein 1                                                                                   | Cluster0029_Lymphatic endothelium-related |
| 1425124_at   | Rnf183                               | ring finger protein 183                                                                                     | Cluster0029_Lymphatic endothelium-related |
| 1426206_at   | Robo4                                | roundabout homolog 4 (Drosophila)                                                                           | Cluster0029_Lymphatic endothelium-related |
| 1421712_at   | Sele                                 | selectin, endothelial cell                                                                                  | Cluster0029_Lymphatic endothelium-related |
| 1420558_at   | Selp                                 | selectin, platelet                                                                                          | Cluster0029_Lymphatic endothelium-related |
| 1419137_at   | Shank3                               | SH3/ankyrin domain gene 3                                                                                   | Cluster0029_Lymphatic endothelium-related |
| 1457465_at   | Shroom4                              | shroom family member 4                                                                                      | Cluster0029_Lymphatic endothelium-related |
| 1431208_a_at | Slc9a3r2                             | solute carrier family 9 (sodium/hydrogen exchanger), member 3 regulator 2                                   | Cluster0029_Lymphatic endothelium-related |
| 1439368_a_at | Slc9a3r2                             | solute carrier family 9 (sodium/hydrogen exchanger), member 3 regulator 2                                   | Cluster0029_Lymphatic endothelium-related |
| 1416564_at   | Sox7                                 | SRY-box containing gene 7                                                                                   | Cluster0029_Lymphatic endothelium-related |
| 1422726_x_at | Speer4a                              | spermatogenesis associated glutamate (E)-rich protein 4a                                                    | Cluster0029_Lymphatic endothelium-related |
| 1429992_at   | Speer4b                              | spermatogenesis associated glutamate (E)-rich protein 4b                                                    | Cluster0029_Lymphatic endothelium-related |
| 1416238_at   | Tie1                                 | tyrosine kinase with immunoglobulin-like and EGF-like domains 1                                             | Cluster0029_Lymphatic endothelium-related |
| 1453285_at   | Tmem88                               | transmembrane protein 88                                                                                    | Cluster0029_Lymphatic endothelium-related |
| 1458871_at   | Tmprss11e                            | transmembrane protease, serine 11e                                                                          | Cluster0029_Lymphatic endothelium-related |
| 1455649_at   | Ttc9                                 | tetratricopeptide repeat domain 9                                                                           | Cluster0029_Lymphatic endothelium-related |
| 1431178_at   | Ulbp1                                | UL16 binding protein 1                                                                                      | Cluster0029_Lymphatic endothelium-related |
| 1451500_at   | Ushbp1                               | Usher syndrome 1C binding protein 1                                                                         | Cluster0029_Lymphatic endothelium-related |
| 1436785_a_at | 1110069O07Rik                        | RIKEN cDNA 1110069O07 gene                                                                                  | Cluster0030_Uncertain                     |
| 1428601_at   | 1700003E16Rik                        | RIKEN cDNA 1700003E16 gene                                                                                  | Cluster0030_Uncertain                     |
| 1433406_at   | 1700084K02Rik                        | RIKEN cDNA 1700084K02 gene                                                                                  | Cluster0030_Uncertain                     |
| 1453829_at   | 2310007J06Rik                        | RIKEN cDNA 2310007J06 gene                                                                                  | Cluster0030_Uncertain                     |
| 1458587_at   | 2310047D07Rik                        | RIKEN cDNA 2310047D07 gene                                                                                  | Cluster0030_Uncertain                     |
| 1453778_at   | 2810407C02Rik                        | RIKEN cDNA 2810407C02 gene                                                                                  | Cluster0030_Uncertain                     |
| 1432582_at   | 3110054G05Rik                        | RIKEN cDNA 3110054G05 gene                                                                                  | Cluster0030_Uncertain                     |
| 1440783_at   | 4930529M08Rik                        | RIKEN cDNA 4930529M08 gene                                                                                  | Cluster0030_Uncertain                     |
| 1430763_at   | 4930563E22Rik                        | RIKEN cDNA 4930563E22 gene                                                                                  | Cluster0030_Uncertain                     |
| 1433836_a_at | 8430408G22Rik                        | RIKEN cDNA 8430408G22 gene                                                                                  | Cluster0030_Uncertain                     |
| 1424262_at   | Aif1l                                | allograft inflammatory factor 1-like                                                                        | Cluster0030_Uncertain                     |
| 1451661_at   | Akap4                                | A kinase (PRKA) anchor protein 4                                                                            | Cluster0030_Uncertain                     |
| 1422415_at   | Ang2                                 | angiogenin, ribonuclease A family, member 2                                                                 | Cluster0030_Uncertain                     |
| 1434950_a_at | Armc8                                | armadillo repeat containing 8                                                                               | Cluster0030_Uncertain                     |
| 1432529_at   | Bol                                  | bol, boule-like (Drosophila)                                                                                | Cluster0030_Uncertain                     |
| 1439745_at   | Cacng7                               | calcium channel, voltage-dependent, gamma subunit 7                                                         | Cluster0030_Uncertain                     |
| 1438825_at   | Calm3                                | calmodulin 3                                                                                                | Cluster0030_Uncertain                     |
| 1440164_x_at | Cd8a                                 | CD8 antigen, alpha chain                                                                                    | Cluster0030_Uncertain                     |
| 1459589_at   | Cry1l                                | crystallin, lambda 1                                                                                        | Cluster0030_Uncertain                     |
| 1420099_at   | D13Ert4787e                          | DNA segment, Chr 13, ERATO Doi 787, expressed                                                               | Cluster0030_Uncertain                     |
| 1433809_at   | Ddx5                                 | DEAD (Asp-Glu-Ala-Asp) box polypeptide 5                                                                    | Cluster0030_Uncertain                     |
| 1422254_a_at | Dyrk1b                               | dual-specificity tyrosine-(Y)-phosphorylation regulated kinase 1b                                           | Cluster0030_Uncertain                     |
| 1458322_x_at | E230008N13Rik                        | RIKEN cDNA E230008N13 gene                                                                                  | Cluster0030_Uncertain                     |
| 1447625_at   | E2f5                                 | E2F transcription factor 5                                                                                  | Cluster0030_Uncertain                     |
| 1447495_at   | Fank1                                | fibronectin type 3 and ankyrin repeat domains 1                                                             | Cluster0030_Uncertain                     |
| 1447622_at   | Fcgr2b                               | Fc receptor, IgG, low affinity IIb                                                                          | Cluster0030_Uncertain                     |
| 1459696_at   | Fry                                  | Furry homolog (Drosophila)                                                                                  | Cluster0030_Uncertain                     |
| 1456594_at   | Gm1971                               | predicted gene 1971                                                                                         | Cluster0030_Uncertain                     |
| 1458418_at   | Gm2380                               | predicted gene 2380                                                                                         | Cluster0030_Uncertain                     |
| 1433584_at   | Gm5620 /// Gm6682 /// Gm7172 /// LOC | predicted gene 5620 /// predicted gene 6682 /// predicted gene 7172 /// similar to tubulin, alpha 1 /// tub | Cluster0030_Uncertain                     |
| 1427593_at   | Gm9798                               | predicted gene 9798                                                                                         | Cluster0030_Uncertain                     |

|              |                         |                                                                                        |                            |
|--------------|-------------------------|----------------------------------------------------------------------------------------|----------------------------|
| 1454803_a_at | Hdac11                  | histone deacetylase 11                                                                 | Cluster0030_Uncertain      |
| 1419999_at   | Igbbp1                  | immunoglobulin (CD79A) binding protein 1                                               | Cluster0030_Uncertain      |
| 1459825_x_at | Igf2bp1                 | insulin-like growth factor 2 mRNA binding protein 1                                    | Cluster0030_Uncertain      |
| 1445805_x_at | Kcnn3                   | potassium voltage-gated channel, subfamily H (eag-related), member 3                   | Cluster0030_Uncertain      |
| 1459107_at   | Kcnn3                   | potassium voltage-gated channel, subfamily H (eag-related), member 3                   | Cluster0030_Uncertain      |
| 1426136_x_at | Klra21                  | killer cell lectin-like receptor subfamily A, member 21                                | Cluster0030_Uncertain      |
| 1447742_at   | Laptm5                  | lysosomal-associated protein transmembrane 5                                           | Cluster0030_Uncertain      |
| 1456578_x_at | Lasp1                   | LIM and SH3 protein 1                                                                  | Cluster0030_Uncertain      |
| 1420332_x_at | Lce1d                   | late cornified envelope 1D                                                             | Cluster0030_Uncertain      |
| 1420293_at   | Lpcat1                  | lysophosphatidylcholine acyltransferase 1                                              | Cluster0030_Uncertain      |
| 1430684_s_at | Lrp2bp                  | Lrp2 binding protein                                                                   | Cluster0030_Uncertain      |
| 1460462_at   | Med18                   | mediator of RNA polymerase II transcription, subunit 18 homolog (yeast)                | Cluster0030_Uncertain      |
| 1438351_at   | Msx2                    | homeobox, msh-like 2                                                                   | Cluster0030_Uncertain      |
| 1434110_x_at | Mup1 /// Mup10 /// Mup2 | major urinary protein 1 /// major urinary protein 10 /// major urinary protein 2       | Cluster0030_Uncertain      |
| 1419836_at   | NA                      | ---                                                                                    | Cluster0030_Uncertain      |
| 1419923_at   | NA                      | ---                                                                                    | Cluster0030_Uncertain      |
| 1420217_x_at | NA                      | ---                                                                                    | Cluster0030_Uncertain      |
| 1423020_at   | NA                      | ---                                                                                    | Cluster0030_Uncertain      |
| 1440080_at   | NA                      | ---                                                                                    | Cluster0030_Uncertain      |
| 1443754_x_at | NA                      | ---                                                                                    | Cluster0030_Uncertain      |
| 1444536_at   | NA                      | ---                                                                                    | Cluster0030_Uncertain      |
| 1444789_at   | NA                      | ---                                                                                    | Cluster0030_Uncertain      |
| 1445231_at   | NA                      | ---                                                                                    | Cluster0030_Uncertain      |
| 1445237_at   | NA                      | ---                                                                                    | Cluster0030_Uncertain      |
| 1446239_at   | NA                      | ---                                                                                    | Cluster0030_Uncertain      |
| 1447005_at   | NA                      | ---                                                                                    | Cluster0030_Uncertain      |
| 1458328_x_at | NA                      | ---                                                                                    | Cluster0030_Uncertain      |
| 1433792_at   | Nrip2                   | nuclear receptor interacting protein 2                                                 | Cluster0030_Uncertain      |
| 1432033_at   | Ntn2                    | netrin G2                                                                              | Cluster0030_Uncertain      |
| 1443798_at   | Pik3cd                  | phosphatidylinositol 3-kinase catalytic delta polypeptide                              | Cluster0030_Uncertain      |
| 1456731_x_at | Polr3k                  | polymerase (RNA) III (DNA directed) polypeptide K                                      | Cluster0030_Uncertain      |
| 1459592_a_at | Ppp1r13l                | protein phosphatase 1, regulatory (inhibitor) subunit 13 like                          | Cluster0030_Uncertain      |
| 1458284_at   | Ptbp1                   | polypyrimidine tract binding protein 1                                                 | Cluster0030_Uncertain      |
| 1443699_at   | Ptprk                   | protein tyrosine phosphatase, receptor type, K                                         | Cluster0030_Uncertain      |
| 1456213_x_at | Qars                    | glutaminyl-tRNA synthetase                                                             | Cluster0030_Uncertain      |
| 1455924_at   | Rab6b                   | RAB6B, member RAS oncogene family                                                      | Cluster0030_Uncertain      |
| 1447557_at   | Rabif                   | RAB interacting factor                                                                 | Cluster0030_Uncertain      |
| 1448860_at   | Rem2                    | rad and gem related GTP binding protein 2                                              | Cluster0030_Uncertain      |
| 1440931_at   | Scrt2                   | scratch homolog 2, zinc finger protein (Drosophila)                                    | Cluster0030_Uncertain      |
| 1438947_x_at | Sema3f                  | sema domain, immunoglobulin domain (Ig), short basic domain, secreted, (semaphorin) 3F | Cluster0030_Uncertain      |
| 1451898_a_at | Sema6c                  | sema domain, transmembrane domain (TM), and cytoplasmic domain, (semaphorin) 6C        | Cluster0030_Uncertain      |
| 1429804_at   | Slc22a16                | solute carrier family 22 (organic cation transporter), member 16                       | Cluster0030_Uncertain      |
| 1439674_at   | Slc4a8                  | solute carrier family 4 (anion exchanger), member 8                                    | Cluster0030_Uncertain      |
| 1420210_at   | Slc8a1                  | solute carrier family 8 (sodium/calcium exchanger), member 1                           | Cluster0030_Uncertain      |
| 1431384_at   | Spem1                   | sperm maturation 1                                                                     | Cluster0030_Uncertain      |
| 1438549_a_at | Srr                     | serine racemase                                                                        | Cluster0030_Uncertain      |
| 1448801_a_at | Timm44                  | translocase of inner mitochondrial membrane 44                                         | Cluster0030_Uncertain      |
| 1447908_x_at | Ttc3                    | tetratricopeptide repeat domain 3                                                      | Cluster0030_Uncertain      |
| 1430851_at   | Zfp444                  | zinc finger protein 444                                                                | Cluster0030_Uncertain      |
| 1421630_at   | Zfy1 /// Zfy2           | zinc finger protein 1, Y linked /// zinc finger protein 2, Y linked                    | Cluster0030_Uncertain      |
| 1428357_at   | 2610019F03Rik           | RIKEN cDNA 2610019F03 gene                                                             | Cluster0031_T cell-related |
| 1430448_at   | 6720418B01Rik           | RIKEN cDNA 6720418B01 gene                                                             | Cluster0031_T cell-related |
| 1426113_x_at | A130082M07Rik /// Tcra  | RIKEN cDNA A130082M07 gene /// T-cell receptor alpha chain                             | Cluster0031_T cell-related |
| 1452405_x_at | A130082M07Rik /// Tcra  | RIKEN cDNA A130082M07 gene /// T-cell receptor alpha chain                             | Cluster0031_T cell-related |
| 1444299_at   | A430093F15Rik           | RIKEN cDNA A430093F15 gene                                                             | Cluster0031_T cell-related |
| 1445450_x_at | A530021J07Rik           | Riken cDNA A530021J07 gene                                                             | Cluster0031_T cell-related |
| 1456751_x_at | A530021J07Rik           | Riken cDNA A530021J07 gene                                                             | Cluster0031_T cell-related |

|              |               |                                                                                  |                            |
|--------------|---------------|----------------------------------------------------------------------------------|----------------------------|
| 1458977_at   | A530021J07Rik | Riken cDNA A530021J07 gene                                                       | Cluster0031_T cell-related |
| 1455370_at   | A630023P12Rik | RIKEN cDNA A630023P12 gene                                                       | Cluster0031_T cell-related |
| 1420794_at   | Art2b         | ADP-ribosyltransferase 2b                                                        | Cluster0031_T cell-related |
| 1442301_at   | AW060742      | expressed sequence AW060742                                                      | Cluster0031_T cell-related |
| 1456235_at   | BB165335      | expressed sequence BB165335                                                      | Cluster0031_T cell-related |
| 1435227_at   | Bcl11b        | B-cell leukemia/lymphoma 11B                                                     | Cluster0031_T cell-related |
| 1438784_at   | Bcl11b        | B-cell leukemia/lymphoma 11B                                                     | Cluster0031_T cell-related |
| 1452966_at   | Bcl11b        | B-cell leukemia/lymphoma 11B                                                     | Cluster0031_T cell-related |
| 1438125_at   | C230085N15Rik | RIKEN cDNA C230085N15 gene                                                       | Cluster0031_T cell-related |
| 1418770_at   | Cd2           | CD2 antigen                                                                      | Cluster0031_T cell-related |
| 1420716_at   | Cd247         | CD247 antigen                                                                    | Cluster0031_T cell-related |
| 1417597_at   | Cd28          | CD28 antigen                                                                     | Cluster0031_T cell-related |
| 1437025_at   | Cd28          | CD28 antigen                                                                     | Cluster0031_T cell-related |
| 1443703_at   | Cd28          | CD28 antigen                                                                     | Cluster0031_T cell-related |
| 1422828_at   | Cd3d          | CD3 antigen, delta polypeptide                                                   | Cluster0031_T cell-related |
| 1422105_at   | Cd3e          | CD3 antigen, epsilon polypeptide                                                 | Cluster0031_T cell-related |
| 1419178_at   | Cd3g          | CD3 antigen, gamma polypeptide                                                   | Cluster0031_T cell-related |
| 1418353_at   | Cd5           | CD5 antigen                                                                      | Cluster0031_T cell-related |
| 1451910_a_at | Cd6           | CD6 antigen                                                                      | Cluster0031_T cell-related |
| 1451763_at   | Cnga1         | cyclic nucleotide gated channel alpha 1                                          | Cluster0031_T cell-related |
| 1453568_at   | Dapl1         | death associated protein-like 1                                                  | Cluster0031_T cell-related |
| 1437699_at   | E430014B02Rik | RIKEN cDNA E430014B02 gene                                                       | Cluster0031_T cell-related |
| 1436608_at   | Fam113b       | family with sequence similarity 113, member B                                    | Cluster0031_T cell-related |
| 1433657_at   | Fam78a        | family with sequence similarity 78, member A                                     | Cluster0031_T cell-related |
| 1420735_at   | Gabrr2        | gamma-aminobutyric acid (GABA) C receptor, subunit rho 2                         | Cluster0031_T cell-related |
| 1436491_at   | Gm11346       | X-linked lymphocyte-regulated 5 pseudogene                                       | Cluster0031_T cell-related |
| 1441286_at   | Gm13948       | predicted gene 13948                                                             | Cluster0031_T cell-related |
| 1446476_at   | Gm16460       | predicted gene 16460                                                             | Cluster0031_T cell-related |
| 1433108_at   | Gm6273        | predicted gene 6273                                                              | Cluster0031_T cell-related |
| 1439808_at   | Ipcef1        | interaction protein for cytohesin exchange factors 1                             | Cluster0031_T cell-related |
| 1443932_at   | Klhdc1        | kelch domain containing 1                                                        | Cluster0031_T cell-related |
| 1439146_s_at | Lck           | lymphocyte protein tyrosine kinase                                               | Cluster0031_T cell-related |
| 1421299_a_at | Lef1          | lymphoid enhancer binding factor 1                                               | Cluster0031_T cell-related |
| 1454734_at   | Lef1          | lymphoid enhancer binding factor 1                                               | Cluster0031_T cell-related |
| 1427849_a_at | LOC665506     | similar to T-cell receptor beta-2 chain C region                                 | Cluster0031_T cell-related |
| 1429274_at   | Lypd6b        | LY6/PLAUR domain containing 6B                                                   | Cluster0031_T cell-related |
| 1439956_at   | Ms4a6b        | Membrane-spanning 4-domains, subfamily A, member 6B                              | Cluster0031_T cell-related |
| 1433107_at   | NA            | ---                                                                              | Cluster0031_T cell-related |
| 1436398_at   | NA            | ---                                                                              | Cluster0031_T cell-related |
| 1438392_at   | NA            | ---                                                                              | Cluster0031_T cell-related |
| 1439203_at   | NA            | ---                                                                              | Cluster0031_T cell-related |
| 1440760_at   | NA            | ---                                                                              | Cluster0031_T cell-related |
| 1441188_at   | NA            | ---                                                                              | Cluster0031_T cell-related |
| 1442045_at   | NA            | ---                                                                              | Cluster0031_T cell-related |
| 1443464_at   | NA            | ---                                                                              | Cluster0031_T cell-related |
| 1444088_at   | NA            | ---                                                                              | Cluster0031_T cell-related |
| 1445937_at   | NA            | ---                                                                              | Cluster0031_T cell-related |
| 1446713_at   | NA            | ---                                                                              | Cluster0031_T cell-related |
| 1446814_at   | NA            | ---                                                                              | Cluster0031_T cell-related |
| 1453788_at   | NA            | ---                                                                              | Cluster0031_T cell-related |
| 1459697_at   | NA            | ---                                                                              | Cluster0031_T cell-related |
| 1416107_at   | Nsg2          | neuron specific gene family member 2                                             | Cluster0031_T cell-related |
| 1456685_at   | Nsg2          | neuron specific gene family member 2                                             | Cluster0031_T cell-related |
| 1434974_at   | Pdk1          | pyruvate dehydrogenase kinase, isoenzyme 1                                       | Cluster0031_T cell-related |
| 1439315_at   | Satb1         | Special AT-rich sequence binding protein 1                                       | Cluster0031_T cell-related |
| 1419328_at   | Sema4f        | sema domain, immunoglobulin domain (Ig), TM domain, and short cytoplasmic domain | Cluster0031_T cell-related |
| 1426550_at   | Sid11         | SID1 transmembrane family, member 1                                              | Cluster0031_T cell-related |



|              |                          |                                                                       |                               |
|--------------|--------------------------|-----------------------------------------------------------------------|-------------------------------|
| 1418751_at   | Sit1                     | suppression inducing transmembrane adaptor 1                          | Cluster0031_T cell-related    |
| 1439595_at   | Tcra                     | T-cell receptor alpha chain                                           | Cluster0031_T cell-related    |
| 1441552_at   | Tcra                     | T-cell receptor alpha chain                                           | Cluster0031_T cell-related    |
| 1426158_at   | Tcrb-J                   | T-cell receptor beta, joining region                                  | Cluster0031_T cell-related    |
| 1427666_a_at | Tcrb-J                   | T-cell receptor beta, joining region                                  | Cluster0031_T cell-related    |
| 1427667_s_at | Tcrb-J                   | T-cell receptor beta, joining region                                  | Cluster0031_T cell-related    |
| 1427752_a_at | Tcrb-J                   | T-cell receptor beta, joining region                                  | Cluster0031_T cell-related    |
| 1427765_a_at | Tcrb-J                   | T-cell receptor beta, joining region                                  | Cluster0031_T cell-related    |
| 1436423_at   | Themis                   | thymocyte selection associated                                        | Cluster0031_T cell-related    |
| 1439719_at   | Themis                   | thymocyte selection associated                                        | Cluster0031_T cell-related    |
| 1442022_at   | Themis                   | thymocyte selection associated                                        | Cluster0031_T cell-related    |
| 1443192_at   | Themis                   | Thymocyte selection associated                                        | Cluster0031_T cell-related    |
| 1441926_x_at | Tmie                     | transmembrane inner ear                                               | Cluster0031_T cell-related    |
| 1443964_at   | Tmie                     | transmembrane inner ear                                               | Cluster0031_T cell-related    |
| 1431698_at   | Ubash3a                  | ubiquitin associated and SH3 domain containing, A                     | Cluster0031_T cell-related    |
| 1423289_a_at | 1810029B16RIK            | RIKEN cDNA 1810029B16 gene                                            | Cluster0032_Phagocyte-related |
| 1422526_at   | Acs11                    | acyl-CoA synthetase long-chain family member 1                        | Cluster0032_Phagocyte-related |
| 1423883_at   | Acs11                    | acyl-CoA synthetase long-chain family member 1                        | Cluster0032_Phagocyte-related |
| 1450643_s_at | Acs11                    | acyl-CoA synthetase long-chain family member 1                        | Cluster0032_Phagocyte-related |
| 1450214_at   | Adora2b /// LOC100045233 | adenosine A2b receptor /// similar to Adenosine A2b receptor          | Cluster0032_Phagocyte-related |
| 1421967_at   | B4galt5                  | UDP-Gal:betaGlcNAc beta 1,4-galactosyltransferase, polypeptide 5      | Cluster0032_Phagocyte-related |
| 1456178_at   | Bambi-ps1                | BMP and activin membrane-bound inhibitor, pseudogene (Xenopus laevis) | Cluster0032_Phagocyte-related |
| 1418489_a_at | Calcr1                   | calcitonin receptor-like                                              | Cluster0032_Phagocyte-related |
| 1419282_at   | Ccl12                    | chemokine (C-C motif) ligand 12                                       | Cluster0032_Phagocyte-related |
| 1421578_at   | Ccl4                     | chemokine (C-C motif) ligand 4                                        | Cluster0032_Phagocyte-related |
| 1421228_at   | Ccl7                     | chemokine (C-C motif) ligand 7                                        | Cluster0032_Phagocyte-related |
| 1417936_at   | Ccl9                     | chemokine (C-C motif) ligand 9                                        | Cluster0032_Phagocyte-related |
| 1417268_at   | Cd14                     | CD14 antigen                                                          | Cluster0032_Phagocyte-related |
| 1419427_at   | Csf3                     | colony stimulating factor 3 (granulocyte)                             | Cluster0032_Phagocyte-related |
| 1424625_a_at | Dennd1a                  | DENN/MADD domain containing 1A                                        | Cluster0032_Phagocyte-related |
| 1421720_a_at | Dtx2                     | deltex 2 homolog (Drosophila)                                         | Cluster0032_Phagocyte-related |
| 1449222_at   | Ebi3                     | Epstein-Barr virus induced gene 3                                     | Cluster0032_Phagocyte-related |
| 1448175_at   | Ehd1                     | EH-domain containing 1                                                | Cluster0032_Phagocyte-related |
| 1431045_at   | Fam49a                   | family with sequence similarity 49, member A                          | Cluster0032_Phagocyte-related |
| 1417876_at   | Fcgr1                    | Fc receptor, IgG, high affinity I                                     | Cluster0032_Phagocyte-related |
| 1436625_at   | Fcgr1                    | Fc receptor, IgG, high affinity I                                     | Cluster0032_Phagocyte-related |
| 1435476_a_at | Fcgr2b                   | Fc receptor, IgG, low affinity IIb                                    | Cluster0032_Phagocyte-related |
| 1435477_s_at | Fcgr2b                   | Fc receptor, IgG, low affinity IIb                                    | Cluster0032_Phagocyte-related |
| 1451941_a_at | Fcgr2b                   | Fc receptor, IgG, low affinity IIb                                    | Cluster0032_Phagocyte-related |
| 1455332_x_at | Fcgr2b                   | Fc receptor, IgG, low affinity IIb                                    | Cluster0032_Phagocyte-related |
| 1425225_at   | Fcgr4                    | Fc receptor, IgG, low affinity IV                                     | Cluster0032_Phagocyte-related |
| 1417859_at   | Gas7                     | growth arrest specific 7                                              | Cluster0032_Phagocyte-related |
| 1431400_a_at | Gas7                     | growth arrest specific 7                                              | Cluster0032_Phagocyte-related |
| 1436530_at   | Gm11428                  | predicted gene 11428                                                  | Cluster0032_Phagocyte-related |
| 1445687_at   | Gm885                    | predicted gene 885                                                    | Cluster0032_Phagocyte-related |
| 1420591_at   | Gpr84                    | G protein-coupled receptor 84                                         | Cluster0032_Phagocyte-related |
| 1424896_at   | Gpr85                    | G protein-coupled receptor 85                                         | Cluster0032_Phagocyte-related |
| 1424897_at   | Gpr85                    | G protein-coupled receptor 85                                         | Cluster0032_Phagocyte-related |
| 1437618_x_at | Gpr85                    | G protein-coupled receptor 85                                         | Cluster0032_Phagocyte-related |
| 1417813_at   | Ikbke                    | inhibitor of kappaB kinase epsilon                                    | Cluster0032_Phagocyte-related |
| 1418609_at   | Il1f6                    | interleukin 1 family, member 6                                        | Cluster0032_Phagocyte-related |
| 1430704_at   | Irak3                    | interleukin-1 receptor-associated kinase 3                            | Cluster0032_Phagocyte-related |
| 1435040_at   | Irak3                    | interleukin-1 receptor-associated kinase 3                            | Cluster0032_Phagocyte-related |
| 1421261_at   | Lipg                     | lipase, endothelial                                                   | Cluster0032_Phagocyte-related |
| 1421262_at   | Lipg                     | lipase, endothelial                                                   | Cluster0032_Phagocyte-related |
| 1450188_s_at | Lipg                     | lipase, endothelial                                                   | Cluster0032_Phagocyte-related |
| 1421180_at   | Lix1                     | limb expression 1 homolog (chicken)                                   | Cluster0032_Phagocyte-related |

|              |               |                                                               |                                                      |
|--------------|---------------|---------------------------------------------------------------|------------------------------------------------------|
| 1426648_at   | Mapkapk2      | MAP kinase-activated protein kinase 2                         | Cluster0032_Phagocyte-related                        |
| 1415922_s_at | Marcks1       | MARCKS-like 1                                                 | Cluster0032_Phagocyte-related                        |
| 1435415_x_at | Marcks1       | MARCKS-like 1                                                 | Cluster0032_Phagocyte-related                        |
| 1435627_x_at | Marcks1       | MARCKS-like 1                                                 | Cluster0032_Phagocyte-related                        |
| 1437226_x_at | Marcks1       | MARCKS-like 1                                                 | Cluster0032_Phagocyte-related                        |
| 1431705_a_at | Mcoln2        | mucolipin 2                                                   | Cluster0032_Phagocyte-related                        |
| 1425434_a_at | Msr1          | macrophage scavenger receptor 1                               | Cluster0032_Phagocyte-related                        |
| 1420393_at   | Nos2          | nitric oxide synthase 2, inducible                            | Cluster0032_Phagocyte-related                        |
| 1450318_a_at | P2ry2         | purinergic receptor P2Y, G-protein coupled 2                  | Cluster0032_Phagocyte-related                        |
| 1416432_at   | Pfkfb3        | 6-phosphofructo-2-kinase/fructose-2,6-biphosphatase 3         | Cluster0032_Phagocyte-related                        |
| 1456676_a_at | Pfkfb3        | 6-phosphofructo-2-kinase/fructose-2,6-biphosphatase 3         | Cluster0032_Phagocyte-related                        |
| 1444969_at   | Pid1          | phosphotyrosine interaction domain containing 1               | Cluster0032_Phagocyte-related                        |
| 1421285_at   | Pik3ap1       | phosphoinositide-3-kinase adaptor protein 1                   | Cluster0032_Phagocyte-related                        |
| 1417519_at   | Plagl2        | pleiomorphic adenoma gene-like 2                              | Cluster0032_Phagocyte-related                        |
| 1456543_at   | Prokr1        | prokineticin receptor 1                                       | Cluster0032_Phagocyte-related                        |
| 1439747_at   | Ptges         | prostaglandin E synthase                                      | Cluster0032_Phagocyte-related                        |
| 1449449_at   | Ptges         | prostaglandin E synthase                                      | Cluster0032_Phagocyte-related                        |
| 1449450_at   | Ptges         | prostaglandin E synthase                                      | Cluster0032_Phagocyte-related                        |
| 1450826_a_at | Saa3          | serum amyloid A 3                                             | Cluster0032_Phagocyte-related                        |
| 1417654_at   | Sdc4          | syndecan 4                                                    | Cluster0032_Phagocyte-related                        |
| 1438884_at   | Shisa3        | shisa homolog 3 ( <i>Xenopus laevis</i> )                     | Cluster0032_Phagocyte-related                        |
| 1460000_at   | Shisa3        | shisa homolog 3 ( <i>Xenopus laevis</i> )                     | Cluster0032_Phagocyte-related                        |
| 1421463_at   | Siglece       | sialic acid binding Ig-like lectin E                          | Cluster0032_Phagocyte-related                        |
| 1416576_at   | Socs3         | suppressor of cytokine signaling 3                            | Cluster0032_Phagocyte-related                        |
| 1417193_at   | Sod2          | superoxide dismutase 2, mitochondrial                         | Cluster0032_Phagocyte-related                        |
| 1417194_at   | Sod2          | superoxide dismutase 2, mitochondrial                         | Cluster0032_Phagocyte-related                        |
| 1448610_a_at | Sod2          | superoxide dismutase 2, mitochondrial                         | Cluster0032_Phagocyte-related                        |
| 1454976_at   | Sod2          | superoxide dismutase 2, mitochondrial                         | Cluster0032_Phagocyte-related                        |
| 1422821_s_at | Stard5        | StAR-related lipid transfer (START) domain containing 5       | Cluster0032_Phagocyte-related                        |
| 1419537_at   | Tcfec         | transcription factor EC                                       | Cluster0032_Phagocyte-related                        |
| 1458668_at   | Tpd52         | tumor protein D52                                             | Cluster0032_Phagocyte-related                        |
| 1443993_at   | Zc3h12a       | zinc finger CCCH type containing 12A                          | Cluster0032_Phagocyte-related                        |
| 1430973_at   | Zfp558        | zinc finger protein 558                                       | Cluster0032_Phagocyte-related                        |
| 1455085_at   | 1700086L19Rik | RIKEN cDNA 1700086L19 gene                                    | Cluster0033_High in Min6, astrocytes & Neuro2A cells |
| 1439833_at   |               | Sep-03 septin 3                                               | Cluster0033_High in Min6, astrocytes & Neuro2A cells |
| 1458779_at   | 8030445P17Rik | RIKEN cDNA 8030445P17 gene                                    | Cluster0033_High in Min6, astrocytes & Neuro2A cells |
| 1438324_at   | 9330182L06Rik | RIKEN cDNA 9330182L06 gene                                    | Cluster0033_High in Min6, astrocytes & Neuro2A cells |
| 1443175_at   | A830010M09Rik | RIKEN cDNA A830010M09 gene                                    | Cluster0033_High in Min6, astrocytes & Neuro2A cells |
| 1429938_at   | A930009E05Rik | RIKEN cDNA A930009E05 gene                                    | Cluster0033_High in Min6, astrocytes & Neuro2A cells |
| 1427044_a_at | Amph          | amphiphysin                                                   | Cluster0033_High in Min6, astrocytes & Neuro2A cells |
| 1434264_at   | Ank2          | ankyrin 2, brain                                              | Cluster0033_High in Min6, astrocytes & Neuro2A cells |
| 1434265_s_at | Ank2          | ankyrin 2, brain                                              | Cluster0033_High in Min6, astrocytes & Neuro2A cells |
| 1433888_at   | Atp2b2        | ATPase, Ca <sup>++</sup> transporting, plasma membrane 2      | Cluster0033_High in Min6, astrocytes & Neuro2A cells |
| 1448211_at   | Atp6v0e2      | ATPase, H <sup>+</sup> transporting, lysosomal V0 subunit E2  | Cluster0033_High in Min6, astrocytes & Neuro2A cells |
| 1431826_a_at | Brsk2         | BR serine/threonine kinase 2                                  | Cluster0033_High in Min6, astrocytes & Neuro2A cells |
| 1423844_s_at | Cbs           | cystathionine beta-synthase                                   | Cluster0033_High in Min6, astrocytes & Neuro2A cells |
| 1425623_a_at | Cbs           | cystathionine beta-synthase                                   | Cluster0033_High in Min6, astrocytes & Neuro2A cells |
| 1449422_at   | Cdh4          | cadherin 4                                                    | Cluster0033_High in Min6, astrocytes & Neuro2A cells |
| 1456397_at   | Cdh4          | cadherin 4                                                    | Cluster0033_High in Min6, astrocytes & Neuro2A cells |
| 1427247_at   | D3Bwg0562e    | DNA segment, Chr 3, Brigham & Women s Genetics 0562 expressed | Cluster0033_High in Min6, astrocytes & Neuro2A cells |
| 1444452_at   | D930002L09Rik | RIKEN cDNA D930002L09 gene                                    | Cluster0033_High in Min6, astrocytes & Neuro2A cells |
| 1435126_at   | Dusp15        | dual specificity phosphatase-like 15                          | Cluster0033_High in Min6, astrocytes & Neuro2A cells |
| 1428739_at   | Enho          | energy homeostasis associated                                 | Cluster0033_High in Min6, astrocytes & Neuro2A cells |
| 1452893_s_at | Enho          | energy homeostasis associated                                 | Cluster0033_High in Min6, astrocytes & Neuro2A cells |
| 1455628_at   | Epb4.114b     | erythrocyte protein band 4.1-like 4b                          | Cluster0033_High in Min6, astrocytes & Neuro2A cells |
| 1456570_at   | Epb4.114b     | erythrocyte protein band 4.1-like 4b                          | Cluster0033_High in Min6, astrocytes & Neuro2A cells |
| 1456063_at   | Fam120c       | family with sequence similarity 120, member C                 | Cluster0033_High in Min6, astrocytes & Neuro2A cells |

|              |                       |                                                                      |                                                      |
|--------------|-----------------------|----------------------------------------------------------------------|------------------------------------------------------|
| 1454051_at   | Fam123a               | family with sequence similarity 123, member A                        | Cluster0033_High in Min6, astrocytes & Neuro2A cells |
| 1436350_at   | Fam171b               | family with sequence similarity 171, member B                        | Cluster0033_High in Min6, astrocytes & Neuro2A cells |
| 1454965_at   | Fam171b               | family with sequence similarity 171, member B                        | Cluster0033_High in Min6, astrocytes & Neuro2A cells |
| 1430066_at   | Fam184a               | family with sequence similarity 184, member A                        | Cluster0033_High in Min6, astrocytes & Neuro2A cells |
| 1434455_at   | Fbxo44                | F-box protein 44                                                     | Cluster0033_High in Min6, astrocytes & Neuro2A cells |
| 1450063_at   | Fmn2 /// LOC100044570 | formin 2 /// similar to formin-2                                     | Cluster0033_High in Min6, astrocytes & Neuro2A cells |
| 1422504_at   | Glrb                  | glycine receptor, beta subunit                                       | Cluster0033_High in Min6, astrocytes & Neuro2A cells |
| 1421152_a_at | Gnao1                 | guanine nucleotide binding protein, alpha O                          | Cluster0033_High in Min6, astrocytes & Neuro2A cells |
| 1448031_at   | Gnao1                 | guanine nucleotide binding protein, alpha O                          | Cluster0033_High in Min6, astrocytes & Neuro2A cells |
| 1418784_at   | Grik5                 | glutamate receptor, ionotropic, kainate 5 (gamma 2)                  | Cluster0033_High in Min6, astrocytes & Neuro2A cells |
| 1433652_at   | Igsf1                 | immunoglobulin superfamily, member 1                                 | Cluster0033_High in Min6, astrocytes & Neuro2A cells |
| 1445550_at   | Klhl32                | kelch-like 32 (Drosophila)                                           | Cluster0033_High in Min6, astrocytes & Neuro2A cells |
| 1436553_at   | Lhfp14                | lipoma HMGIC fusion partner-like protein 4                           | Cluster0033_High in Min6, astrocytes & Neuro2A cells |
| 1416053_at   | Lrrn1                 | leucine rich repeat protein 1, neuronal                              | Cluster0033_High in Min6, astrocytes & Neuro2A cells |
| 1433469_at   | Lrrn2                 | leucine rich repeat protein 2, neuronal                              | Cluster0033_High in Min6, astrocytes & Neuro2A cells |
| 1420532_at   | Magi2                 | membrane associated guanylate kinase, WW and PDZ domain containing 2 | Cluster0033_High in Min6, astrocytes & Neuro2A cells |
| 1435367_at   | Mapk4                 | mitogen-activated protein kinase 4                                   | Cluster0033_High in Min6, astrocytes & Neuro2A cells |
| 1440619_at   | Mapk8ip1              | mitogen-activated protein kinase 8 interacting protein 1             | Cluster0033_High in Min6, astrocytes & Neuro2A cells |
| 1434194_at   | Mtap2                 | microtubule-associated protein 2                                     | Cluster0033_High in Min6, astrocytes & Neuro2A cells |
| 1435489_at   | NA                    | ---                                                                  | Cluster0033_High in Min6, astrocytes & Neuro2A cells |
| 1436463_at   | NA                    | ---                                                                  | Cluster0033_High in Min6, astrocytes & Neuro2A cells |
| 1438891_at   | NA                    | ---                                                                  | Cluster0033_High in Min6, astrocytes & Neuro2A cells |
| 1440838_at   | NA                    | ---                                                                  | Cluster0033_High in Min6, astrocytes & Neuro2A cells |
| 1441983_at   | NA                    | ---                                                                  | Cluster0033_High in Min6, astrocytes & Neuro2A cells |
| 1445847_at   | NA                    | ---                                                                  | Cluster0033_High in Min6, astrocytes & Neuro2A cells |
| 1457743_at   | NA                    | ---                                                                  | Cluster0033_High in Min6, astrocytes & Neuro2A cells |
| 1426864_a_at | Ncam1                 | neural cell adhesion molecule 1                                      | Cluster0033_High in Min6, astrocytes & Neuro2A cells |
| 1456068_at   | Nfasc                 | neurofascin                                                          | Cluster0033_High in Min6, astrocytes & Neuro2A cells |
| 1435305_at   | Ntrk2                 | neurotrophic tyrosine kinase, receptor, type 2                       | Cluster0033_High in Min6, astrocytes & Neuro2A cells |
| 1458622_at   | Ntrk2                 | neurotrophic tyrosine kinase, receptor, type 2                       | Cluster0033_High in Min6, astrocytes & Neuro2A cells |
| 1426887_at   | Nudt11                | nudix (nucleoside diphosphate linked moiety X)-type motif 11         | Cluster0033_High in Min6, astrocytes & Neuro2A cells |
| 1436718_at   | Nxph1                 | neurexophilin 1                                                      | Cluster0033_High in Min6, astrocytes & Neuro2A cells |
| 1428211_at   | P4htm                 | prolyl 4-hydroxylase, transmembrane (endoplasmic reticulum)          | Cluster0033_High in Min6, astrocytes & Neuro2A cells |
| 1436449_at   | Pcdh11x               | protocadherin 11 X-linked                                            | Cluster0033_High in Min6, astrocytes & Neuro2A cells |
| 1449583_at   | Pcdhb20               | protocadherin beta 20                                                | Cluster0033_High in Min6, astrocytes & Neuro2A cells |
| 1436876_at   | Rgs7bp                | regulator of G-protein signalling 7 binding protein                  | Cluster0033_High in Min6, astrocytes & Neuro2A cells |
| 1448628_at   | Scg3                  | secretogranin III                                                    | Cluster0033_High in Min6, astrocytes & Neuro2A cells |
| 1439500_at   | Scrn1                 | secernin 1                                                           | Cluster0033_High in Min6, astrocytes & Neuro2A cells |
| 1424764_at   | Sez6l                 | seizure related 6 homolog like                                       | Cluster0033_High in Min6, astrocytes & Neuro2A cells |
| 1418485_at   | Slc4a3                | solute carrier family 4 (anion exchanger), member 3                  | Cluster0033_High in Min6, astrocytes & Neuro2A cells |
| 1436662_at   | Sorcs1                | VPS10 domain receptor protein SORCS 1                                | Cluster0033_High in Min6, astrocytes & Neuro2A cells |
| 1426616_at   | Tlcd1                 | TLC domain containing 1                                              | Cluster0033_High in Min6, astrocytes & Neuro2A cells |
| 1417174_at   | Tmem218               | transmembrane protein 218                                            | Cluster0033_High in Min6, astrocytes & Neuro2A cells |
| 1430153_at   | Tmod2                 | tropomodulin 2                                                       | Cluster0033_High in Min6, astrocytes & Neuro2A cells |
| 1431326_a_at | Tmod2                 | tropomodulin 2                                                       | Cluster0033_High in Min6, astrocytes & Neuro2A cells |
| 1435060_at   | Tmod2                 | tropomodulin 2                                                       | Cluster0033_High in Min6, astrocytes & Neuro2A cells |
| 1421096_at   | Trpc1                 | transient receptor potential cation channel, subfamily C, member 1   | Cluster0033_High in Min6, astrocytes & Neuro2A cells |
| 1417502_at   | Tspan7                | tetraspanin 7                                                        | Cluster0033_High in Min6, astrocytes & Neuro2A cells |
| 1426617_a_at | Ttyh1                 | tweety homolog 1 (Drosophila)                                        | Cluster0033_High in Min6, astrocytes & Neuro2A cells |
| 1435392_at   | Wdr17                 | WD repeat domain 17                                                  | Cluster0033_High in Min6, astrocytes & Neuro2A cells |
| 1457647_x_at | 1600023N17Rik         | RIKEN cDNA 1600023N17 gene                                           | Cluster0034_Low in some Paneth cells                 |
| 1441822_at   | 1700008F19Rik         | RIKEN cDNA 1700008F19 gene                                           | Cluster0034_Low in some Paneth cells                 |
| 1436814_at   | 1810010D01Rik         | RIKEN cDNA 1810010D01 gene                                           | Cluster0034_Low in some Paneth cells                 |
| 1436815_x_at | 1810010D01Rik         | RIKEN cDNA 1810010D01 gene                                           | Cluster0034_Low in some Paneth cells                 |
| 1436677_at   | 1810032O08Rik         | RIKEN cDNA 1810032O08 gene                                           | Cluster0034_Low in some Paneth cells                 |
| 1438615_x_at | 2010317E24Rik         | RIKEN cDNA 2010317E24 gene                                           | Cluster0034_Low in some Paneth cells                 |
| 1432355_at   | 2210039B01Rik         | RIKEN cDNA 2210039B01 gene                                           | Cluster0034_Low in some Paneth cells                 |

|              |                        |                                                                                    |                                      |
|--------------|------------------------|------------------------------------------------------------------------------------|--------------------------------------|
| 1432667_at   | 2210411G17Rik          | RIKEN cDNA 2210411G17 gene                                                         | Cluster0034_Low in some Paneth cells |
| 1431806_at   | 4931408D14Rik          | RIKEN cDNA 4931408D14 gene                                                         | Cluster0034_Low in some Paneth cells |
| 1431248_at   | 5031426D15Rik          | RIKEN cDNA 5031426D15 gene                                                         | Cluster0034_Low in some Paneth cells |
| 1430766_at   | 5033403F01Rik          | RIKEN cDNA 5033403F01 gene                                                         | Cluster0034_Low in some Paneth cells |
| 1429927_at   | 5830409B07Rik          | RIKEN cDNA 5830409B07 gene                                                         | Cluster0034_Low in some Paneth cells |
| 1433338_at   | 6720460K10Rik          | RIKEN cDNA 6720460K10 gene                                                         | Cluster0034_Low in some Paneth cells |
| 1420141_at   | AA517023               | expressed sequence AA517023                                                        | Cluster0034_Low in some Paneth cells |
| 1441935_at   | Ankra2                 | ankyrin repeat, family A (RFXANK-like), 2                                          | Cluster0034_Low in some Paneth cells |
| 1432018_at   | Ascl2                  | achaete-scute complex homolog 2 (Drosophila)                                       | Cluster0034_Low in some Paneth cells |
| 1437770_at   | AW557046               | expressed sequence AW557046                                                        | Cluster0034_Low in some Paneth cells |
| 1433155_at   | B230204H03Rik          | RIKEN cDNA B230204H03 gene                                                         | Cluster0034_Low in some Paneth cells |
| 1456701_at   | B230208H17Rik          | RIKEN cDNA B230208H17 gene                                                         | Cluster0034_Low in some Paneth cells |
| 1441839_s_at | BC024814               | cDNA sequence BC024814                                                             | Cluster0034_Low in some Paneth cells |
| 1455565_at   | Bcl9                   | B-cell CLL/lymphoma 9                                                              | Cluster0034_Low in some Paneth cells |
| 1418914_s_at | Bhmt2                  | betaine-homocysteine methyltransferase 2                                           | Cluster0034_Low in some Paneth cells |
| 1458942_at   | C230037E05Rik          | RIKEN cDNA C230037E05 gene                                                         | Cluster0034_Low in some Paneth cells |
| 1445681_at   | Cdca7                  | Cell division cycle associated 7                                                   | Cluster0034_Low in some Paneth cells |
| 1437690_x_at | Csnk1d                 | casein kinase 1, delta                                                             | Cluster0034_Low in some Paneth cells |
| 1445454_at   | D2Ertd282e             | DNA segment, Chr 2, ERATO Doi 282, expressed                                       | Cluster0034_Low in some Paneth cells |
| 1441506_at   | Dcn                    | decorin                                                                            | Cluster0034_Low in some Paneth cells |
| 1419491_at   | Defb1                  | defensin beta 1                                                                    | Cluster0034_Low in some Paneth cells |
| 1419492_s_at | Defb1                  | defensin beta 1                                                                    | Cluster0034_Low in some Paneth cells |
| 1456794_at   | E230016M11Rik          | RIKEN cDNA E230016M11 gene                                                         | Cluster0034_Low in some Paneth cells |
| 1445605_s_at | Fam135a                | family with sequence similarity 135, member A                                      | Cluster0034_Low in some Paneth cells |
| 1453461_at   | Fxc1                   | fractured callus expressed transcript 1                                            | Cluster0034_Low in some Paneth cells |
| 1455661_at   | Gm9958                 | predicted gene 9958                                                                | Cluster0034_Low in some Paneth cells |
| 1439428_x_at | Gm5                    | GDP-mannose 4, 6-dehydratase                                                       | Cluster0034_Low in some Paneth cells |
| 1439568_at   | Greb1 /// LOC100045413 | gene regulated by estrogen in breast cancer protein /// similar to Greb1 protein   | Cluster0034_Low in some Paneth cells |
| 1443695_at   | Habp2                  | hyaluronic acid binding protein 2                                                  | Cluster0034_Low in some Paneth cells |
| 1457018_at   | Kcnma1                 | Potassium large conductance calcium-activated channel, subfamily M, alpha member 1 | Cluster0034_Low in some Paneth cells |
| 1422071_at   | Lgals6                 | lectin, galactose binding, soluble 6                                               | Cluster0034_Low in some Paneth cells |
| 1444037_at   | Lman1                  | lectin, mannose-binding, 1                                                         | Cluster0034_Low in some Paneth cells |
| 1445422_at   | LOC621549              | hypothetical protein LOC621549                                                     | Cluster0034_Low in some Paneth cells |
| 1454845_x_at | Mchr1                  | melanin-concentrating hormone receptor 1                                           | Cluster0034_Low in some Paneth cells |
| 1440728_at   | NA                     | ---                                                                                | Cluster0034_Low in some Paneth cells |
| 1440810_x_at | NA                     | ---                                                                                | Cluster0034_Low in some Paneth cells |
| 1441547_at   | NA                     | ---                                                                                | Cluster0034_Low in some Paneth cells |
| 1441854_at   | NA                     | ---                                                                                | Cluster0034_Low in some Paneth cells |
| 1442422_at   | NA                     | ---                                                                                | Cluster0034_Low in some Paneth cells |
| 1442715_at   | NA                     | ---                                                                                | Cluster0034_Low in some Paneth cells |
| 1443770_x_at | NA                     | ---                                                                                | Cluster0034_Low in some Paneth cells |
| 1443833_at   | NA                     | ---                                                                                | Cluster0034_Low in some Paneth cells |
| 1444045_at   | NA                     | ---                                                                                | Cluster0034_Low in some Paneth cells |
| 1445713_at   | NA                     | ---                                                                                | Cluster0034_Low in some Paneth cells |
| 1445774_at   | NA                     | ---                                                                                | Cluster0034_Low in some Paneth cells |
| 1445979_at   | NA                     | ---                                                                                | Cluster0034_Low in some Paneth cells |
| 1446075_at   | NA                     | ---                                                                                | Cluster0034_Low in some Paneth cells |
| 1447023_at   | NA                     | ---                                                                                | Cluster0034_Low in some Paneth cells |
| 1447119_at   | NA                     | ---                                                                                | Cluster0034_Low in some Paneth cells |
| 1449601_x_at | NA                     | ---                                                                                | Cluster0034_Low in some Paneth cells |
| 1457128_at   | NA                     | ---                                                                                | Cluster0034_Low in some Paneth cells |
| 1458340_at   | NA                     | ---                                                                                | Cluster0034_Low in some Paneth cells |
| 1460103_at   | NA                     | ---                                                                                | Cluster0034_Low in some Paneth cells |
| 1460149_at   | NA                     | ---                                                                                | Cluster0034_Low in some Paneth cells |
| 1433111_at   | Nhsl1                  | NHS-like 1                                                                         | Cluster0034_Low in some Paneth cells |
| 1455860_at   | Pigh                   | phosphatidylinositol glycan anchor biosynthesis, class H                           | Cluster0034_Low in some Paneth cells |
| 1447564_x_at | Piwil4                 | piwi-like homolog 4 (Drosophila)                                                   | Cluster0034_Low in some Paneth cells |

|              |                         |                                                               |                                       |
|--------------|-------------------------|---------------------------------------------------------------|---------------------------------------|
| 1459366_at   | Rgmb                    | RGM domain family, member B                                   | Cluster0034_Low in some Paneth cells  |
| 1443768_at   | Rhoa                    | Ras homolog gene family, member A                             | Cluster0034_Low in some Paneth cells  |
| 1416490_at   | Tmed6                   | transmembrane emp24 protein transport domain containing 6     | Cluster0034_Low in some Paneth cells  |
| 1438254_at   | 1110007A13Rik           | RIKEN cDNA 1110007A13 gene                                    | Cluster0035_High in some granulocytes |
| 1436446_at   | 2310007O11Rik           | RIKEN cDNA 2310007O11 gene                                    | Cluster0035_High in some granulocytes |
| 1453627_at   | 2610020P09Rik           | RIKEN cDNA 2610020P09 gene                                    | Cluster0035_High in some granulocytes |
| 1420329_at   | 4930455C21Rik           | RIKEN cDNA 4930455C21 gene                                    | Cluster0035_High in some granulocytes |
| 1442654_at   | A530054K11Rik           | RIKEN cDNA A530054K11 gene                                    | Cluster0035_High in some granulocytes |
| 1456670_at   | A930007A09Rik           | RIKEN cDNA A930007A09 gene                                    | Cluster0035_High in some granulocytes |
| 1439478_at   | Acot2                   | acyl-CoA thioesterase 2                                       | Cluster0035_High in some granulocytes |
| 1425685_at   | Akr1b10                 | Aldo-keto reductase family 1, member B10 (aldose reductase)   | Cluster0035_High in some granulocytes |
| 1434701_at   | Alkbh5                  | alkB, alkylation repair homolog 5 (E. coli)                   | Cluster0035_High in some granulocytes |
| 1458452_at   | Ankrd11                 | Ankyrin repeat domain 11                                      | Cluster0035_High in some granulocytes |
| 1433597_at   | Arglu1                  | arginine and glutamate rich 1                                 | Cluster0035_High in some granulocytes |
| 1457889_at   | AU014972                | expressed sequence AU014972                                   | Cluster0035_High in some granulocytes |
| 1454523_at   | C530007A02Rik           | RIKEN cDNA C530007A02 gene                                    | Cluster0035_High in some granulocytes |
| 1442984_at   | C80060                  | expressed sequence C80060                                     | Cluster0035_High in some granulocytes |
| 1449991_at   | Cd244                   | CD244 natural killer cell receptor 2B4                        | Cluster0035_High in some granulocytes |
| 1458110_at   | D430030G11Rik           | RIKEN cDNA D430030G11 gene                                    | Cluster0035_High in some granulocytes |
| 1457901_at   | D4Ertd76e               | DNA segment, Chr 4, ERATO Doi 76, expressed                   | Cluster0035_High in some granulocytes |
| 1459326_at   | D9Ertd256e              | DNA segment, Chr 9, ERATO Doi 256, expressed                  | Cluster0035_High in some granulocytes |
| 1453312_at   | Dcaf6                   | DDB1 and CUL4 associated factor 6                             | Cluster0035_High in some granulocytes |
| 1420861_at   | Dctn4                   | dynactin 4                                                    | Cluster0035_High in some granulocytes |
| 1420115_at   | Exosc8                  | exosome component 8                                           | Cluster0035_High in some granulocytes |
| 1452085_at   | Gata1                   | GATA zinc finger domain containing 1                          | Cluster0035_High in some granulocytes |
| 1454958_at   | Gsk3b                   | glycogen synthase kinase 3 beta                               | Cluster0035_High in some granulocytes |
| 1444842_at   | Kdm5a                   | lysine (K)-specific demethylase 5A                            | Cluster0035_High in some granulocytes |
| 1434752_at   | LOC100044751 /// Zfp207 | hypothetical protein LOC100044751 /// zinc finger protein 207 | Cluster0035_High in some granulocytes |
| 1418288_at   | Lpin1                   | lipin 1                                                       | Cluster0035_High in some granulocytes |
| 1426516_a_at | Lpin1                   | lipin 1                                                       | Cluster0035_High in some granulocytes |
| 1420112_at   | NA                      | ---                                                           | Cluster0035_High in some granulocytes |
| 1420172_at   | NA                      | ---                                                           | Cluster0035_High in some granulocytes |
| 1438714_at   | NA                      | ---                                                           | Cluster0035_High in some granulocytes |
| 1439517_at   | NA                      | ---                                                           | Cluster0035_High in some granulocytes |
| 1440365_at   | NA                      | ---                                                           | Cluster0035_High in some granulocytes |
| 1440862_at   | NA                      | ---                                                           | Cluster0035_High in some granulocytes |
| 1441592_at   | NA                      | ---                                                           | Cluster0035_High in some granulocytes |
| 1442761_at   | NA                      | ---                                                           | Cluster0035_High in some granulocytes |
| 1443966_at   | NA                      | ---                                                           | Cluster0035_High in some granulocytes |
| 1444199_at   | NA                      | ---                                                           | Cluster0035_High in some granulocytes |
| 1445427_at   | NA                      | ---                                                           | Cluster0035_High in some granulocytes |
| 1446129_at   | NA                      | ---                                                           | Cluster0035_High in some granulocytes |
| 1446384_at   | NA                      | ---                                                           | Cluster0035_High in some granulocytes |
| 1447561_at   | NA                      | ---                                                           | Cluster0035_High in some granulocytes |
| 1457047_at   | NA                      | ---                                                           | Cluster0035_High in some granulocytes |
| 1457390_at   | NA                      | ---                                                           | Cluster0035_High in some granulocytes |
| 1457849_at   | NA                      | ---                                                           | Cluster0035_High in some granulocytes |
| 1459695_at   | NA                      | ---                                                           | Cluster0035_High in some granulocytes |
| 1448027_at   | Ncoa3                   | nuclear receptor coactivator 3                                | Cluster0035_High in some granulocytes |
| 1423200_at   | Ncor1                   | nuclear receptor co-repressor 1                               | Cluster0035_High in some granulocytes |
| 1455556_at   | Notch2                  | Notch gene homolog 2 (Drosophila)                             | Cluster0035_High in some granulocytes |
| 1447837_x_at | Polh                    | polymerase (DNA directed), eta (RAD 30 related)               | Cluster0035_High in some granulocytes |
| 1434514_at   | Rbm15                   | RNA binding motif protein 15                                  | Cluster0035_High in some granulocytes |
| 1438419_at   | Rbm16                   | RNA binding motif protein 16                                  | Cluster0035_High in some granulocytes |
| 1431113_at   | Rbm4b                   | RNA binding motif protein 4B                                  | Cluster0035_High in some granulocytes |
| 1448079_at   | Rnf166                  | ring finger protein 166                                       | Cluster0035_High in some granulocytes |
| 1440275_at   | Runx3                   | runt related transcription factor 3                           | Cluster0035_High in some granulocytes |

|              |               |                                                         |                                       |
|--------------|---------------|---------------------------------------------------------|---------------------------------------|
| 1439882_at   | Sec23ip       | Sec23 interacting protein                               | Cluster0035_High in some granulocytes |
| 1442408_at   | Sulf2         | sulfatase 2                                             | Cluster0035_High in some granulocytes |
| 1426357_at   | Taok1         | TAO kinase 1                                            | Cluster0035_High in some granulocytes |
| 1438082_at   | Tmem206       | transmembrane protein 206                               | Cluster0035_High in some granulocytes |
| 1442004_at   | Trim65        | tripartite motif-containing 65                          | Cluster0035_High in some granulocytes |
| 1429515_at   | Ubr2          | ubiquitin protein ligase E3 component n-recogin 2       | Cluster0035_High in some granulocytes |
| 1429085_at   | Vezf1         | vascular endothelial zinc finger 1                      | Cluster0035_High in some granulocytes |
| 1442282_at   | Vmn2r84       | Vomeronal 2, receptor 84                                | Cluster0035_High in some granulocytes |
| 1452401_at   | Wtap          | Wilms tumour 1-associating protein                      | Cluster0035_High in some granulocytes |
| 1460357_at   | Ythdf2        | YTH domain family 2                                     | Cluster0035_High in some granulocytes |
| 1457285_at   | Zfp187        | zinc finger protein 187                                 | Cluster0035_High in some granulocytes |
| 1451997_at   | Zfp426        | zinc finger protein 426                                 | Cluster0035_High in some granulocytes |
| 1441883_at   | 0610010O12Rik | RIKEN cDNA 0610010O12 gene                              | Cluster0036_Intestine-related         |
| 1430017_at   | 1600016N20Rik | RIKEN cDNA 1600016N20 gene                              | Cluster0036_Intestine-related         |
| 1424626_at   | 2010003K11Rik | RIKEN cDNA 2010003K11 gene                              | Cluster0036_Intestine-related         |
| 1421489_a_at | 2010106E10Rik | RIKEN cDNA 2010106E10 gene                              | Cluster0036_Intestine-related         |
| 1450109_s_at | Abcc2         | ATP-binding cassette, sub-family C (CFTR/MRP), member 2 | Cluster0036_Intestine-related         |
| 1419393_at   | Abcg5         | ATP-binding cassette, sub-family G (WHITE), member 5    | Cluster0036_Intestine-related         |
| 1429608_at   | Adh6a         | alcohol dehydrogenase 6A (class V)                      | Cluster0036_Intestine-related         |
| 1437813_at   | Aim1l         | absent in melanoma 1-like                               | Cluster0036_Intestine-related         |
| 1457554_at   | Apob          | apolipoprotein B                                        | Cluster0036_Intestine-related         |
| 1453080_at   | Apol7a        | apolipoprotein L 7a                                     | Cluster0036_Intestine-related         |
| 1430329_at   | Cgn           | cingulin                                                | Cluster0036_Intestine-related         |
| 1435155_at   | Cgn           | cingulin                                                | Cluster0036_Intestine-related         |
| 1448448_a_at | Chkb          | choline kinase beta                                     | Cluster0036_Intestine-related         |
| 1455399_at   | Cnksr1        | connector enhancer of kinase suppressor of Ras 1        | Cluster0036_Intestine-related         |
| 1424688_at   | Creb3l3       | cAMP responsive element binding protein 3-like 3        | Cluster0036_Intestine-related         |
| 1436631_at   | Ctnna1        | catenin (cadherin associated protein), alpha 1          | Cluster0036_Intestine-related         |
| 1419523_at   | Cyp3a13       | cytochrome P450, family 3, subfamily a, polypeptide 13  | Cluster0036_Intestine-related         |
| 1456422_at   | Dennd5b       | DENN/MADD domain containing 5B                          | Cluster0036_Intestine-related         |
| 1439260_a_at | Enpp3         | ectonucleotide pyrophosphatase/phosphodiesterase 3      | Cluster0036_Intestine-related         |
| 1417843_s_at | Eps8l2        | EPS8-like 2                                             | Cluster0036_Intestine-related         |
| 1448798_at   | Eps8l3        | EPS8-like 3                                             | Cluster0036_Intestine-related         |
| 1423005_a_at | Espn          | espin                                                   | Cluster0036_Intestine-related         |
| 1426701_at   | Fam160a2      | family with sequence similarity 160, member A2          | Cluster0036_Intestine-related         |
| 1425464_at   | Gata6         | GATA binding protein 6                                  | Cluster0036_Intestine-related         |
| 1422868_s_at | Gda           | guanine deaminase                                       | Cluster0036_Intestine-related         |
| 1448803_at   | Golga4        | golgi autoantigen, golgin subfamily a, 4                | Cluster0036_Intestine-related         |
| 1417434_at   | Gpd2          | glycerol phosphate dehydrogenase 2, mitochondrial       | Cluster0036_Intestine-related         |
| 1428323_at   | Gpd2          | glycerol phosphate dehydrogenase 2, mitochondrial       | Cluster0036_Intestine-related         |
| 1452741_s_at | Gpd2          | glycerol phosphate dehydrogenase 2, mitochondrial       | Cluster0036_Intestine-related         |
| 1456833_at   | Gpr17         | G protein-coupled receptor 17                           | Cluster0036_Intestine-related         |
| 1418984_at   | Inadl         | InaD-like (Drosophila)                                  | Cluster0036_Intestine-related         |
| 1433527_at   | Ireb2         | iron responsive element binding protein 2               | Cluster0036_Intestine-related         |
| 1451774_at   | Krtap4-16     | keratin associated protein 4-16                         | Cluster0036_Intestine-related         |
| 1442581_at   | Ksr1          | kinase suppressor of ras 1                              | Cluster0036_Intestine-related         |
| 1458453_at   | Lmo7          | LIM domain only 7                                       | Cluster0036_Intestine-related         |
| 1452837_at   | Lpin2         | lipin 2                                                 | Cluster0036_Intestine-related         |
| 1460290_at   | Lpin2         | lipin 2                                                 | Cluster0036_Intestine-related         |
| 1449440_at   | Lpin3         | lipin 3                                                 | Cluster0036_Intestine-related         |
| 1460636_at   | Map2k2        | mitogen-activated protein kinase 2                      | Cluster0036_Intestine-related         |
| 1447823_x_at | Mapk12        | mitogen-activated protein kinase 12                     | Cluster0036_Intestine-related         |
| 1428898_at   | Mon1a         | MON1 homolog A (yeast)                                  | Cluster0036_Intestine-related         |
| 1451422_at   | Myo18a        | myosin XVIIIa                                           | Cluster0036_Intestine-related         |
| 1420426_at   | Myo7b         | myosin VIIb                                             | Cluster0036_Intestine-related         |
| 1442952_at   | NA            | ---                                                     | Cluster0036_Intestine-related         |
| 1443436_at   | NA            | ---                                                     | Cluster0036_Intestine-related         |

|              |               |                                                                            |                                                                 |
|--------------|---------------|----------------------------------------------------------------------------|-----------------------------------------------------------------|
| 1445781_at   | NA            | ---                                                                        | Cluster0036_Intestine-related                                   |
| 1459167_at   | NA            | ---                                                                        | Cluster0036_Intestine-related                                   |
| 1438514_at   | Npc1l1        | NPC1-like 1                                                                | Cluster0036_Intestine-related                                   |
| 1420493_a_at | Pcyt2         | phosphate cytidylyltransferase 2, ethanolamine                             | Cluster0036_Intestine-related                                   |
| 1456888_at   | Pfkfb4        | 6-phosphofructo-2-kinase/fructose-2,6-biphosphatase 4                      | Cluster0036_Intestine-related                                   |
| 1416424_at   | Plin3         | perilipin 3                                                                | Cluster0036_Intestine-related                                   |
| 1455996_x_at | Prap1         | proline-rich acidic protein 1                                              | Cluster0036_Intestine-related                                   |
| 1440875_a_at | Rsad1         | radical S-adenosyl methionine domain containing 1                          | Cluster0036_Intestine-related                                   |
| 1439348_at   | S100a10       | S100 calcium binding protein A10 (calpactin)                               | Cluster0036_Intestine-related                                   |
| 1452653_at   | Slc25a22      | solute carrier family 25 (mitochondrial carrier, glutamate), member 22     | Cluster0036_Intestine-related                                   |
| 1416639_at   | Slc2a5        | solute carrier family 2 (facilitated glucose transporter), member 5        | Cluster0036_Intestine-related                                   |
| 1448596_at   | Slc6a8        | solute carrier family 6 (neurotransmitter transporter, creatine), member 8 | Cluster0036_Intestine-related                                   |
| 1424148_a_at | Stap2         | signal transducing adaptor family member 2                                 | Cluster0036_Intestine-related                                   |
| 1451261_s_at | Stap2         | signal transducing adaptor family member 2                                 | Cluster0036_Intestine-related                                   |
| 1424059_at   | Suv420h2      | suppressor of variegation 4-20 homolog 2 (Drosophila)                      | Cluster0036_Intestine-related                                   |
| 1419388_at   | Tm4sf20       | transmembrane 4 L six family member 20                                     | Cluster0036_Intestine-related                                   |
| 1425635_at   | Tnk1          | tyrosine kinase, non-receptor, 1                                           | Cluster0036_Intestine-related                                   |
| 1437915_at   | Tom1l2        | target of myb1-like 2 (chicken)                                            | Cluster0036_Intestine-related                                   |
| 1416689_at   | Tuft1         | tuftelin 1                                                                 | Cluster0036_Intestine-related                                   |
| 1439184_s_at | Txndc17       | thioredoxin domain containing 17                                           | Cluster0036_Intestine-related                                   |
| 1430494_at   | Urgcp         | upregulator of cell proliferation                                          | Cluster0036_Intestine-related                                   |
| 1425000_s_at | 5430407P10Rik | RIKEN cDNA 5430407P10 gene                                                 | Cluster0037_High in MIMCD3 renal inner medullary epithelial cel |
| 1456210_at   | 5430407P10Rik | RIKEN cDNA 5430407P10 gene                                                 | Cluster0037_High in MIMCD3 renal inner medullary epithelial cel |
| 1424263_at   | Aif1l         | allograft inflammatory factor 1-like                                       | Cluster0037_High in MIMCD3 renal inner medullary epithelial cel |
| 1451287_s_at | Aif1l         | allograft inflammatory factor 1-like                                       | Cluster0037_High in MIMCD3 renal inner medullary epithelial cel |
| 1434092_at   | Atg9b         | ATG9 autophagy related 9 homolog B (S. cerevisiae)                         | Cluster0037_High in MIMCD3 renal inner medullary epithelial cel |
| 1458648_at   | AU042950      | expressed sequence AU042950                                                | Cluster0037_High in MIMCD3 renal inner medullary epithelial cel |
| 1437558_at   | B130021B11Rik | RIKEN cDNA B130021B11 gene                                                 | Cluster0037_High in MIMCD3 renal inner medullary epithelial cel |
| 1438989_s_at | B130021B11Rik | RIKEN cDNA B130021B11 gene                                                 | Cluster0037_High in MIMCD3 renal inner medullary epithelial cel |
| 1424791_a_at | Bcam          | basal cell adhesion molecule                                               | Cluster0037_High in MIMCD3 renal inner medullary epithelial cel |
| 1442845_at   | C130075A20Rik | RIKEN cDNA C130075A20 gene                                                 | Cluster0037_High in MIMCD3 renal inner medullary epithelial cel |
| 1448906_at   | Cdh16         | cadherin 16                                                                | Cluster0037_High in MIMCD3 renal inner medullary epithelial cel |
| 1426673_at   | Cdh3          | cadherin 3                                                                 | Cluster0037_High in MIMCD3 renal inner medullary epithelial cel |
| 1450288_at   | Cdh6          | cadherin 6                                                                 | Cluster0037_High in MIMCD3 renal inner medullary epithelial cel |
| 1437932_a_at | Cldn1         | claudin 1                                                                  | Cluster0037_High in MIMCD3 renal inner medullary epithelial cel |
| 1450014_at   | Cldn1         | claudin 1                                                                  | Cluster0037_High in MIMCD3 renal inner medullary epithelial cel |
| 1438779_at   | Col4a3        | collagen, type IV, alpha 3                                                 | Cluster0037_High in MIMCD3 renal inner medullary epithelial cel |
| 1450224_at   | Col4a3        | collagen, type IV, alpha 3                                                 | Cluster0037_High in MIMCD3 renal inner medullary epithelial cel |
| 1425772_at   | Col4a4        | collagen, type IV, alpha 4                                                 | Cluster0037_High in MIMCD3 renal inner medullary epithelial cel |
| 1440250_at   | Col4a4        | collagen, type IV, alpha 4                                                 | Cluster0037_High in MIMCD3 renal inner medullary epithelial cel |
| 1445328_at   | Col4a4        | collagen, type IV, alpha 4                                                 | Cluster0037_High in MIMCD3 renal inner medullary epithelial cel |
| 1436532_at   | Dclk3         | doublecortin-like kinase 3                                                 | Cluster0037_High in MIMCD3 renal inner medullary epithelial cel |
| 1425199_a_at | Epb4.115      | erythrocyte protein band 4.1-like 5                                        | Cluster0037_High in MIMCD3 renal inner medullary epithelial cel |
| 1459120_at   | Epb4.115      | erythrocyte protein band 4.1-like 5                                        | Cluster0037_High in MIMCD3 renal inner medullary epithelial cel |
| 1435551_at   | Fhod3         | formin homology 2 domain containing 3                                      | Cluster0037_High in MIMCD3 renal inner medullary epithelial cel |
| 1456552_at   | Foxl2os       | forkhead box L2 opposite strand transcript                                 | Cluster0037_High in MIMCD3 renal inner medullary epithelial cel |
| 1422179_at   | Gjb4          | gap junction protein, beta 4                                               | Cluster0037_High in MIMCD3 renal inner medullary epithelial cel |
| 1439816_at   | Gm10567       | predicted gene 10567                                                       | Cluster0037_High in MIMCD3 renal inner medullary epithelial cel |
| 1421224_a_at | Hnf1b         | HNF1B homeobox B                                                           | Cluster0037_High in MIMCD3 renal inner medullary epithelial cel |
| 1449397_at   | Hoxb2         | homeobox B2                                                                | Cluster0037_High in MIMCD3 renal inner medullary epithelial cel |
| 1452317_at   | Hoxb9         | homeobox B9                                                                | Cluster0037_High in MIMCD3 renal inner medullary epithelial cel |
| 1441174_a_at | Lmlin         | leishmanolysin-like (metallopeptidase M8 family)                           | Cluster0037_High in MIMCD3 renal inner medullary epithelial cel |
| 1457044_at   | Macc1         | metastasis associated in colon cancer 1                                    | Cluster0037_High in MIMCD3 renal inner medullary epithelial cel |
| 1417275_at   | Mal           | myelin and lymphocyte protein, T-cell differentiation protein              | Cluster0037_High in MIMCD3 renal inner medullary epithelial cel |
| 1432558_a_at | Mal           | myelin and lymphocyte protein, T-cell differentiation protein              | Cluster0037_High in MIMCD3 renal inner medullary epithelial cel |
| 1433438_x_at | Mela          | melanoma antigen                                                           | Cluster0037_High in MIMCD3 renal inner medullary epithelial cel |
| 1456182_x_at | Mela          | melanoma antigen                                                           | Cluster0037_High in MIMCD3 renal inner medullary epithelial cel |

|              |                                   |                                                                                             |                                                                 |
|--------------|-----------------------------------|---------------------------------------------------------------------------------------------|-----------------------------------------------------------------|
| 1456456_x_at | Mela                              | Melanoma antigen                                                                            | Cluster0037_High in MIMCD3 renal inner medullary epithelial cel |
| 1442097_at   | NA                                | ---                                                                                         | Cluster0037_High in MIMCD3 renal inner medullary epithelial cel |
| 1442257_at   | NA                                | ---                                                                                         | Cluster0037_High in MIMCD3 renal inner medullary epithelial cel |
| 1443157_at   | NA                                | ---                                                                                         | Cluster0037_High in MIMCD3 renal inner medullary epithelial cel |
| 1443253_at   | NA                                | ---                                                                                         | Cluster0037_High in MIMCD3 renal inner medullary epithelial cel |
| 1444540_at   | NA                                | ---                                                                                         | Cluster0037_High in MIMCD3 renal inner medullary epithelial cel |
| 1446178_at   | NA                                | ---                                                                                         | Cluster0037_High in MIMCD3 renal inner medullary epithelial cel |
| 1457317_at   | NA                                | ---                                                                                         | Cluster0037_High in MIMCD3 renal inner medullary epithelial cel |
| 1459702_at   | NA                                | ---                                                                                         | Cluster0037_High in MIMCD3 renal inner medullary epithelial cel |
| 1418208_at   | Pax8                              | paired box gene 8                                                                           | Cluster0037_High in MIMCD3 renal inner medullary epithelial cel |
| 1419820_at   | Pkhd1                             | polycystic kidney and hepatic disease 1                                                     | Cluster0037_High in MIMCD3 renal inner medullary epithelial cel |
| 1460732_a_at | Ppl                               | periplakin                                                                                  | Cluster0037_High in MIMCD3 renal inner medullary epithelial cel |
| 1420352_at   | Prss22                            | protease, serine, 22                                                                        | Cluster0037_High in MIMCD3 renal inner medullary epithelial cel |
| 1431791_a_at | Ptpn13                            | protein tyrosine phosphatase, non-receptor type 13                                          | Cluster0037_High in MIMCD3 renal inner medullary epithelial cel |
| 1423854_a_at | Ras11b                            | RAS-like, family 11, member B                                                               | Cluster0037_High in MIMCD3 renal inner medullary epithelial cel |
| 1422837_at   | Scel                              | sciellin                                                                                    | Cluster0037_High in MIMCD3 renal inner medullary epithelial cel |
| 1434867_at   | Slc4a11                           | solute carrier family 4, sodium bicarbonate transporter-like, member 11                     | Cluster0037_High in MIMCD3 renal inner medullary epithelial cel |
| 1457989_at   | Slc4a11                           | solute carrier family 4, sodium bicarbonate transporter-like, member 11                     | Cluster0037_High in MIMCD3 renal inner medullary epithelial cel |
| 1431101_a_at | Srd5a1                            | steroid 5 alpha-reductase 1                                                                 | Cluster0037_High in MIMCD3 renal inner medullary epithelial cel |
| 1438699_at   | Srd5a1                            | steroid 5 alpha-reductase 1                                                                 | Cluster0037_High in MIMCD3 renal inner medullary epithelial cel |
| 1454649_at   | Srd5a1                            | steroid 5 alpha-reductase 1                                                                 | Cluster0037_High in MIMCD3 renal inner medullary epithelial cel |
| 1424221_at   | Susd4                             | sushi domain containing 4                                                                   | Cluster0037_High in MIMCD3 renal inner medullary epithelial cel |
| 1460593_at   | Susd4                             | sushi domain containing 4                                                                   | Cluster0037_High in MIMCD3 renal inner medullary epithelial cel |
| 1423323_at   | Tacstd2                           | tumor-associated calcium signal transducer 2                                                | Cluster0037_High in MIMCD3 renal inner medullary epithelial cel |
| 1419063_at   | Ugt8a                             | UDP galactosyltransferase 8A                                                                | Cluster0037_High in MIMCD3 renal inner medullary epithelial cel |
| 1419064_a_at | Ugt8a                             | UDP galactosyltransferase 8A                                                                | Cluster0037_High in MIMCD3 renal inner medullary epithelial cel |
| 1438567_at   | Vwa2                              | von Willebrand factor A domain containing 2                                                 | Cluster0037_High in MIMCD3 renal inner medullary epithelial cel |
| 1420891_at   | Wnt7b                             | wingless-related MMTV integration site 7B                                                   | Cluster0037_High in MIMCD3 renal inner medullary epithelial cel |
| 1420892_at   | Wnt7b                             | wingless-related MMTV integration site 7B                                                   | Cluster0037_High in MIMCD3 renal inner medullary epithelial cel |
| 1416077_at   | Adm                               | adrenomedullin                                                                              | Cluster0038_Lymphatic endothelium-related                       |
| 1448831_at   | Angpt2                            | angiopoietin 2                                                                              | Cluster0038_Lymphatic endothelium-related                       |
| 1441228_at   | Apold1                            | apolipoprotein L domain containing 1                                                        | Cluster0038_Lymphatic endothelium-related                       |
| 1425660_at   | Btbd3                             | BTB (POZ) domain containing 3                                                               | Cluster0038_Lymphatic endothelium-related                       |
| 1433868_at   | Btbd3                             | BTB (POZ) domain containing 3                                                               | Cluster0038_Lymphatic endothelium-related                       |
| 1453232_at   | Calr3                             | calreticulin 3                                                                              | Cluster0038_Lymphatic endothelium-related                       |
| 1453233_s_at | Calr3                             | calreticulin 3                                                                              | Cluster0038_Lymphatic endothelium-related                       |
| 1422047_at   | Cdh5                              | cadherin 5                                                                                  | Cluster0038_Lymphatic endothelium-related                       |
| 1451440_at   | Chodl                             | chondrolectin                                                                               | Cluster0038_Lymphatic endothelium-related                       |
| 1419467_at   | Clec14a                           | C-type lectin domain family 14, member a                                                    | Cluster0038_Lymphatic endothelium-related                       |
| 1419468_at   | Clec14a                           | C-type lectin domain family 14, member a                                                    | Cluster0038_Lymphatic endothelium-related                       |
| 1426951_at   | Crim1                             | cysteine rich transmembrane BMP regulator 1 (chordin like)                                  | Cluster0038_Lymphatic endothelium-related                       |
| 1452253_at   | Crim1                             | cysteine rich transmembrane BMP regulator 1 (chordin like)                                  | Cluster0038_Lymphatic endothelium-related                       |
| 1444028_s_at | Dock9                             | dedicator of cytokinesis 9                                                                  | Cluster0038_Lymphatic endothelium-related                       |
| 1450931_at   | Dock9                             | dedicator of cytokinesis 9                                                                  | Cluster0038_Lymphatic endothelium-related                       |
| 1450932_s_at | Dock9                             | dedicator of cytokinesis 9                                                                  | Cluster0038_Lymphatic endothelium-related                       |
| 1456051_at   | Drd1a                             | dopamine receptor D1A                                                                       | Cluster0038_Lymphatic endothelium-related                       |
| 1437451_at   | Ecscr                             | endothelial cell-specific chemotaxis regulator                                              | Cluster0038_Lymphatic endothelium-related                       |
| 1421335_a_at | Egfl7                             | EGF-like domain 7                                                                           | Cluster0038_Lymphatic endothelium-related                       |
| 1435823_x_at | Egfl7                             | EGF-like domain 7                                                                           | Cluster0038_Lymphatic endothelium-related                       |
| 1451427_a_at | Egfl7                             | EGF-like domain 7                                                                           | Cluster0038_Lymphatic endothelium-related                       |
| 1451428_x_at | Egfl7                             | EGF-like domain 7                                                                           | Cluster0038_Lymphatic endothelium-related                       |
| 1425582_a_at | Emcn                              | endomucin                                                                                   | Cluster0038_Lymphatic endothelium-related                       |
| 1417271_a_at | Eng                               | endoglin                                                                                    | Cluster0038_Lymphatic endothelium-related                       |
| 1443682_at   | Eng                               | Endoglin                                                                                    | Cluster0038_Lymphatic endothelium-related                       |
| 1421442_at   | Flt4                              | FMS-like tyrosine kinase 4                                                                  | Cluster0038_Lymphatic endothelium-related                       |
| 1444052_at   | Flt4                              | FMS-like tyrosine kinase 4                                                                  | Cluster0038_Lymphatic endothelium-related                       |
| 1450292_a_at | Gm15529 /// Hormad1 /// LOC675573 | predicted gene 15529 /// HORMA domain containing 1 /// similar to HORMA domain containing 1 | Cluster0038_Lymphatic endothelium-related                       |



|              |                             |                                                                                     |                                           |
|--------------|-----------------------------|-------------------------------------------------------------------------------------|-------------------------------------------|
| 1448942_at   | Gng11                       | guanine nucleotide binding protein (G protein), gamma 11                            | Cluster0038_Lymphatic endothelium-related |
| 1420581_at   | Gpr143                      | G protein-coupled receptor 143                                                      | Cluster0038_Lymphatic endothelium-related |
| 1418606_at   | Hoxd10                      | homeobox D10                                                                        | Cluster0038_Lymphatic endothelium-related |
| 1422080_at   | Il7                         | interleukin 7                                                                       | Cluster0038_Lymphatic endothelium-related |
| 1436861_at   | Il7                         | interleukin 7                                                                       | Cluster0038_Lymphatic endothelium-related |
| 1440355_at   | Kctd12b                     | potassium channel tetramerisation domain containing 12b                             | Cluster0038_Lymphatic endothelium-related |
| 1442368_at   | Kctd12b                     | potassium channel tetramerisation domain containing 12b                             | Cluster0038_Lymphatic endothelium-related |
| 1439078_at   | Klhl4                       | kelch-like 4 (Drosophila)                                                           | Cluster0038_Lymphatic endothelium-related |
| 1445318_at   | Klhl4                       | kelch-like 4 (Drosophila)                                                           | Cluster0038_Lymphatic endothelium-related |
| 1421101_a_at | Ldb2                        | LIM domain binding 2                                                                | Cluster0038_Lymphatic endothelium-related |
| 1439557_s_at | Ldb2                        | LIM domain binding 2                                                                | Cluster0038_Lymphatic endothelium-related |
| 1456786_at   | Ldb2                        | LIM domain binding 2                                                                | Cluster0038_Lymphatic endothelium-related |
| 1429379_at   | Lyve1                       | lymphatic vessel endothelial hyaluronan receptor 1                                  | Cluster0038_Lymphatic endothelium-related |
| 1453128_at   | Lyve1                       | lymphatic vessel endothelial hyaluronan receptor 1                                  | Cluster0038_Lymphatic endothelium-related |
| 1422216_at   | Mid2                        | midline 2                                                                           | Cluster0038_Lymphatic endothelium-related |
| 1450537_at   | Mid2                        | midline 2                                                                           | Cluster0038_Lymphatic endothelium-related |
| 1437260_at   | Mmrn1                       | multimerin 1                                                                        | Cluster0038_Lymphatic endothelium-related |
| 1426433_at   | Myct1                       | myc target 1                                                                        | Cluster0038_Lymphatic endothelium-related |
| 1438048_at   | Myct1                       | myc target 1                                                                        | Cluster0038_Lymphatic endothelium-related |
| 1422138_at   | Plau                        | plasminogen activator, urokinase                                                    | Cluster0038_Lymphatic endothelium-related |
| 1422139_at   | Plau                        | plasminogen activator, urokinase                                                    | Cluster0038_Lymphatic endothelium-related |
| 1425681_a_at | Prnd                        | prion protein dublet                                                                | Cluster0038_Lymphatic endothelium-related |
| 1421336_at   | Prox1                       | prospero-related homeobox 1                                                         | Cluster0038_Lymphatic endothelium-related |
| 1437894_at   | Prox1                       | prospero-related homeobox 1                                                         | Cluster0038_Lymphatic endothelium-related |
| 1457432_at   | Prox1                       | prospero-related homeobox 1                                                         | Cluster0038_Lymphatic endothelium-related |
| 1427942_at   | Rassf9                      | Ras association (RalGDS/AF-6) domain family (N-terminal) member 9                   | Cluster0038_Lymphatic endothelium-related |
| 1449465_at   | Reln                        | reelin                                                                              | Cluster0038_Lymphatic endothelium-related |
| 1449086_at   | Rnf141                      | ring finger protein 141                                                             | Cluster0038_Lymphatic endothelium-related |
| 1449087_at   | Rnf141                      | ring finger protein 141                                                             | Cluster0038_Lymphatic endothelium-related |
| 1439204_at   | Scn3a                       | sodium channel, voltage-gated, type III, alpha                                      | Cluster0038_Lymphatic endothelium-related |
| 1458813_at   | Scn5a                       | sodium channel, voltage-gated, type V, alpha                                        | Cluster0038_Lymphatic endothelium-related |
| 1449135_at   | Sox18                       | SRY-box containing gene 18                                                          | Cluster0038_Lymphatic endothelium-related |
| 1425783_at   | Tc2n                        | tandem C2 domains, nuclear                                                          | Cluster0038_Lymphatic endothelium-related |
| 1439045_x_at | Tc2n                        | tandem C2 domains, nuclear                                                          | Cluster0038_Lymphatic endothelium-related |
| 1451838_a_at | Tc2n                        | tandem C2 domains, nuclear                                                          | Cluster0038_Lymphatic endothelium-related |
| 1418547_at   | Tfpi2                       | tissue factor pathway inhibitor 2                                                   | Cluster0038_Lymphatic endothelium-related |
| 1417577_at   | Trpc3                       | transient receptor potential cation channel, subfamily C, member 3                  | Cluster0038_Lymphatic endothelium-related |
| 1460404_at   | 0610007P08Rik               | RIKEN cDNA 0610007P08 gene                                                          | Cluster0039_Mast cell-related             |
| 1447886_at   | 0610040B09Rik               | RIKEN cDNA 0610040B09 gene                                                          | Cluster0039_Mast cell-related             |
| 1446612_at   | 9330118A15Rik               | RIKEN cDNA 9330118A15 gene                                                          | Cluster0039_Mast cell-related             |
| 1423071_x_at | 9930105H17Rik /// LOC381508 | RIKEN cDNA 9930105H17 gene /// similar to RIKEN cDNA 2610524H06 gene                | Cluster0039_Mast cell-related             |
| 1430482_at   | Adora3                      | adenosine A3 receptor                                                               | Cluster0039_Mast cell-related             |
| 1426952_at   | Arhgap18                    | Rho GTPase activating protein 18                                                    | Cluster0039_Mast cell-related             |
| 1431133_at   | Arhgap18                    | Rho GTPase activating protein 18                                                    | Cluster0039_Mast cell-related             |
| 1427522_at   | Arhgap20                    | Rho GTPase activating protein 20                                                    | Cluster0039_Mast cell-related             |
| 1429918_at   | Arhgap20                    | Rho GTPase activating protein 20                                                    | Cluster0039_Mast cell-related             |
| 1453813_at   | Cd200r3                     | CD200 receptor 3                                                                    | Cluster0039_Mast cell-related             |
| 1435313_at   | Cd200r4                     | CD200 receptor 4                                                                    | Cluster0039_Mast cell-related             |
| 1418710_at   | Cd59a                       | CD59a antigen                                                                       | Cluster0039_Mast cell-related             |
| 1449456_a_at | Cma1                        | chymase 1, mast cell                                                                | Cluster0039_Mast cell-related             |
| 1448730_at   | Cpa3                        | carboxypeptidase A3, mast cell                                                      | Cluster0039_Mast cell-related             |
| 1449360_at   | Csf2rb2                     | colony stimulating factor 2 receptor, beta 2, low-affinity (granulocyte-macrophage) | Cluster0039_Mast cell-related             |
| 1432273_a_at | Darc                        | Duffy blood group, chemokine receptor                                               | Cluster0039_Mast cell-related             |
| 1446265_at   | Dnm3                        | dynamilin 3                                                                         | Cluster0039_Mast cell-related             |
| 1428122_s_at | Fam125b                     | family with sequence similarity 125, member B                                       | Cluster0039_Mast cell-related             |
| 1436842_at   | Fam63b                      | family with sequence similarity 63, member B                                        | Cluster0039_Mast cell-related             |
| 1421775_at   | Fcer1a                      | Fc receptor, IgE, high affinity I, alpha polypeptide                                | Cluster0039_Mast cell-related             |

|              |                     |                                                                                                              |                                      |
|--------------|---------------------|--------------------------------------------------------------------------------------------------------------|--------------------------------------|
| 1422542_at   | Gpr34               | G protein-coupled receptor 34                                                                                | Cluster0039_Mast cell-related        |
| 1419060_at   | Gzmb                | granzyme B                                                                                                   | Cluster0039_Mast cell-related        |
| 1450047_at   | Hs6st2              | heparan sulfate 6-O-sulfotransferase 2                                                                       | Cluster0039_Mast cell-related        |
| 1425145_at   | Il1rl1              | interleukin 1 receptor-like 1                                                                                | Cluster0039_Mast cell-related        |
| 1457359_at   | Inpp4b              | inositol polyphosphate-4-phosphatase, type II                                                                | Cluster0039_Mast cell-related        |
| 1452514_a_at | Kit                 | kit oncogene                                                                                                 | Cluster0039_Mast cell-related        |
| 1434360_s_at | LOC632664 /// Ptpng | similar to protein tyrosine phosphatase, receptor type, G /// protein tyrosine phosphatase, receptor type, G | Cluster0039_Mast cell-related        |
| 1428615_at   | Lpar6               | lysophosphatidic acid receptor 6                                                                             | Cluster0039_Mast cell-related        |
| 1424679_at   | Mab2111             | mab-21-like 1 (C. elegans)                                                                                   | Cluster0039_Mast cell-related        |
| 1427755_at   | Mcpt-ps1            | mast cell protease, pseudogene 1                                                                             | Cluster0039_Mast cell-related        |
| 1430439_at   | Mctp1               | multiple C2 domains, transmembrane 1                                                                         | Cluster0039_Mast cell-related        |
| 1443264_at   | Ms4a2               | membrane-spanning 4-domains, subfamily A, member 2                                                           | Cluster0039_Mast cell-related        |
| 1442184_at   | NA                  | ---                                                                                                          | Cluster0039_Mast cell-related        |
| 1444126_at   | NA                  | ---                                                                                                          | Cluster0039_Mast cell-related        |
| 1446426_at   | NA                  | ---                                                                                                          | Cluster0039_Mast cell-related        |
| 1446946_at   | NA                  | ---                                                                                                          | Cluster0039_Mast cell-related        |
| 1457063_at   | NA                  | ---                                                                                                          | Cluster0039_Mast cell-related        |
| 1458900_at   | NA                  | ---                                                                                                          | Cluster0039_Mast cell-related        |
| 1459588_at   | NA                  | ---                                                                                                          | Cluster0039_Mast cell-related        |
| 1453777_a_at | Ndst3               | N-deacetylase/N-sulfotransferase (heparan glucosaminyl) 3                                                    | Cluster0039_Mast cell-related        |
| 1418104_at   | Nrip3               | nuclear receptor interacting protein 3                                                                       | Cluster0039_Mast cell-related        |
| 1431597_a_at | Nrip3               | nuclear receptor interacting protein 3                                                                       | Cluster0039_Mast cell-related        |
| 1460719_a_at | P2rx1               | purinergic receptor P2X, ligand-gated ion channel, 1                                                         | Cluster0039_Mast cell-related        |
| 1439088_at   | Pdzd8               | PDZ domain containing 8                                                                                      | Cluster0039_Mast cell-related        |
| 1455477_s_at | Pdzk1ip1            | PDZK1 interacting protein 1                                                                                  | Cluster0039_Mast cell-related        |
| 1439527_at   | Pgr                 | progesterone receptor                                                                                        | Cluster0039_Mast cell-related        |
| 1433626_at   | Plscr4              | phospholipid scramblase 4                                                                                    | Cluster0039_Mast cell-related        |
| 1420611_at   | Prkacb              | protein kinase, cAMP dependent, catalytic, beta                                                              | Cluster0039_Mast cell-related        |
| 1429691_at   | Ptpng               | protein tyrosine phosphatase, receptor type, G                                                               | Cluster0039_Mast cell-related        |
| 1456070_at   | Ptpng               | protein tyrosine phosphatase, receptor type, G                                                               | Cluster0039_Mast cell-related        |
| 1417215_at   | Rab27b              | RAB27b, member RAS oncogene family                                                                           | Cluster0039_Mast cell-related        |
| 1420398_at   | Rgs18               | regulator of G-protein signaling 18                                                                          | Cluster0039_Mast cell-related        |
| 1437079_at   | Slc18a2             | solute carrier family 18 (vesicular monoamine), member 2                                                     | Cluster0039_Mast cell-related        |
| 1424308_at   | Slc24a3             | solute carrier family 24 (sodium/potassium/calcium exchanger), member 3                                      | Cluster0039_Mast cell-related        |
| 1426663_s_at | Slc45a3             | solute carrier family 45, member 3                                                                           | Cluster0039_Mast cell-related        |
| 1426664_x_at | Slc45a3             | solute carrier family 45, member 3                                                                           | Cluster0039_Mast cell-related        |
| 1420903_at   | St6galnac3          | ST6 (alpha-N-acetyl-neuraminyl-2,3-beta-galactosyl-1,3)-N-acetylgalactosaminide alpha-2,6-sialyltransferase  | Cluster0039_Mast cell-related        |
| 1420895_at   | Tgfbr1              | transforming growth factor, beta receptor I                                                                  | Cluster0039_Mast cell-related        |
| 1418057_at   | Tiam1               | T-cell lymphoma invasion and metastasis 1                                                                    | Cluster0039_Mast cell-related        |
| 1419524_at   | Tph1                | tryptophan hydroxylase 1                                                                                     | Cluster0039_Mast cell-related        |
| 1446771_at   | Tuba8               | tubulin, alpha 8                                                                                             | Cluster0039_Mast cell-related        |
| 1451720_at   | Vps39               | vacuolar protein sorting 39 (yeast)                                                                          | Cluster0039_Mast cell-related        |
| 1426221_at   | Vwa5a               | von Willebrand factor A domain containing 5A                                                                 | Cluster0039_Mast cell-related        |
| 1426222_s_at | Vwa5a               | von Willebrand factor A domain containing 5A                                                                 | Cluster0039_Mast cell-related        |
| 1456366_at   | 1700015F17Rik       | RIKEN cDNA 1700015F17 gene                                                                                   | Cluster0040_Low in some Paneth cells |
| 1457258_at   | 1700017L05Rik       | RIKEN cDNA 1700017L05 gene                                                                                   | Cluster0040_Low in some Paneth cells |
| 1447648_at   | 1700021N20Rik       | RIKEN cDNA 1700021N20 gene                                                                                   | Cluster0040_Low in some Paneth cells |
| 1447687_x_at | 2410075B13Rik       | RIKEN cDNA 2410075B13 gene                                                                                   | Cluster0040_Low in some Paneth cells |
| 1454328_at   | 2900060K15Rik       | RIKEN cDNA 2900060K15 gene                                                                                   | Cluster0040_Low in some Paneth cells |
| 1432376_at   | 3830403N18Rik       | RIKEN cDNA 3830403N18 gene                                                                                   | Cluster0040_Low in some Paneth cells |
| 1454376_at   | 4833410I11Rik       | RIKEN cDNA 4833410I11 gene                                                                                   | Cluster0040_Low in some Paneth cells |
| 1432956_at   | 4930444K16Rik       | RIKEN cDNA 4930444K16 gene                                                                                   | Cluster0040_Low in some Paneth cells |
| 1432169_at   | 4930523O13Rik       | RIKEN cDNA 4930523O13 gene                                                                                   | Cluster0040_Low in some Paneth cells |
| 1438346_at   | 4930525G20Rik       | RIKEN cDNA 4930525G20 gene                                                                                   | Cluster0040_Low in some Paneth cells |
| 1443994_at   | 6030407O03Rik       | RIKEN cDNA 6030407O03 gene                                                                                   | Cluster0040_Low in some Paneth cells |
| 1460522_at   | 6030458E02Rik       | RIKEN cDNA 6030458E02 gene                                                                                   | Cluster0040_Low in some Paneth cells |
| 1454527_at   | 8430437B07Rik       | RIKEN cDNA 8430437B07 gene                                                                                   | Cluster0040_Low in some Paneth cells |

|                        |                                           |                                                                                                       |                                                                  |
|------------------------|-------------------------------------------|-------------------------------------------------------------------------------------------------------|------------------------------------------------------------------|
| 1451958_at             | AB069917 /// Igh-VJ558 /// Ighv1-72 /// L | cDNA sequence AB069917 /// immunoglobulin heavy chain (J558 family) /// immunoglobulin heavy variable | Cluster0040_Low in some Paneth cells                             |
| 1429605_at             | Ankrd7                                    | ankyrin repeat domain 7                                                                               | Cluster0040_Low in some Paneth cells                             |
| 1459769_at             | BC048609                                  | cDNA sequence BC048609                                                                                | Cluster0040_Low in some Paneth cells                             |
| 1443537_at             | C130009A20Rik                             | RIKEN cDNA C130009A20 gene                                                                            | Cluster0040_Low in some Paneth cells                             |
| 1446790_at             | C78948                                    | expressed sequence C78948                                                                             | Cluster0040_Low in some Paneth cells                             |
| 1441432_at             | C820005J03Rik                             | RIKEN cDNA C820005J03 gene                                                                            | Cluster0040_Low in some Paneth cells                             |
| 1456224_x_at           | Cage1                                     | cancer antigen 1                                                                                      | Cluster0040_Low in some Paneth cells                             |
| 1443570_at             | Cops3                                     | COP9 (constitutive photomorphogenic) homolog, subunit 3 (Arabidopsis thaliana)                        | Cluster0040_Low in some Paneth cells                             |
| 1427181_at             | D18ErtD653e                               | DNA segment, Chr 18, ERATO Doi 653, expressed                                                         | Cluster0040_Low in some Paneth cells                             |
| 1445921_at             | D2ErtD397e                                | DNA segment, Chr 2, ERATO Doi 397, expressed                                                          | Cluster0040_Low in some Paneth cells                             |
| 1427873_at             | Defa15                                    | defensin, alpha, 15                                                                                   | Cluster0040_Low in some Paneth cells                             |
| 1427612_at             | Defb9                                     | defensin beta 9                                                                                       | Cluster0040_Low in some Paneth cells                             |
| 1421542_at             | Dzip1                                     | DAZ interacting protein 1                                                                             | Cluster0040_Low in some Paneth cells                             |
| 1425842_at             | Edil3                                     | EGF-like repeats and discoidin I-like domains 3                                                       | Cluster0040_Low in some Paneth cells                             |
| 1442872_at             | Kri1                                      | KRI1 homolog (S. cerevisiae)                                                                          | Cluster0040_Low in some Paneth cells                             |
| 1420676_at             | Lce1a1                                    | late cornified envelope 1A1                                                                           | Cluster0040_Low in some Paneth cells                             |
| 1420436_x_at           | LOC100048071 /// Tex21                    | similar to tsec-2 /// testis expressed gene 21                                                        | Cluster0040_Low in some Paneth cells                             |
| 1456637_at             | Lrrtm2                                    | leucine rich repeat transmembrane neuronal 2                                                          | Cluster0040_Low in some Paneth cells                             |
| 1429952_at             | Mospd4                                    | motile sperm domain containing 4                                                                      | Cluster0040_Low in some Paneth cells                             |
| 1420227_at             | NA                                        | ---                                                                                                   | Cluster0040_Low in some Paneth cells                             |
| 1426038_at             | NA                                        | ---                                                                                                   | Cluster0040_Low in some Paneth cells                             |
| 1441294_at             | NA                                        | ---                                                                                                   | Cluster0040_Low in some Paneth cells                             |
| 1442990_at             | NA                                        | ---                                                                                                   | Cluster0040_Low in some Paneth cells                             |
| 1443168_at             | NA                                        | ---                                                                                                   | Cluster0040_Low in some Paneth cells                             |
| 1443617_at             | NA                                        | ---                                                                                                   | Cluster0040_Low in some Paneth cells                             |
| 1444853_at             | NA                                        | ---                                                                                                   | Cluster0040_Low in some Paneth cells                             |
| 1445113_at             | NA                                        | ---                                                                                                   | Cluster0040_Low in some Paneth cells                             |
| 1445592_at             | NA                                        | ---                                                                                                   | Cluster0040_Low in some Paneth cells                             |
| 1445782_at             | NA                                        | ---                                                                                                   | Cluster0040_Low in some Paneth cells                             |
| 1445803_at             | NA                                        | ---                                                                                                   | Cluster0040_Low in some Paneth cells                             |
| 1449774_at             | NA                                        | ---                                                                                                   | Cluster0040_Low in some Paneth cells                             |
| 1449801_at             | NA                                        | ---                                                                                                   | Cluster0040_Low in some Paneth cells                             |
| 1454435_at             | NA                                        | ---                                                                                                   | Cluster0040_Low in some Paneth cells                             |
| 1458744_at             | NA                                        | ---                                                                                                   | Cluster0040_Low in some Paneth cells                             |
| 1458883_at             | NA                                        | ---                                                                                                   | Cluster0040_Low in some Paneth cells                             |
| 1459554_at             | NA                                        | ---                                                                                                   | Cluster0040_Low in some Paneth cells                             |
| AFFX-BioB-3_at         | NA                                        | ---                                                                                                   | Cluster0040_Low in some Paneth cells                             |
| AFFX-BioB-5_at         | NA                                        | ---                                                                                                   | Cluster0040_Low in some Paneth cells                             |
| 1449798_at             | Rab3c                                     | RAB3C, member RAS oncogene family                                                                     | Cluster0040_Low in some Paneth cells                             |
| 1434346_at             | Rufy2                                     | RUN and FYVE domain-containing 2                                                                      | Cluster0040_Low in some Paneth cells                             |
| 1449394_at             | Slco1b2                                   | solute carrier organic anion transporter family, member 1b2                                           | Cluster0040_Low in some Paneth cells                             |
| 1427598_at             | Snord116                                  | small nucleolar RNA, C/D box 116 cluster                                                              | Cluster0040_Low in some Paneth cells                             |
| 1420185_at             | Ssx2ip                                    | synovial sarcoma, X breakpoint 2 interacting protein                                                  | Cluster0040_Low in some Paneth cells                             |
| 1423145_a_at           | Tcap                                      | titin-cap                                                                                             | Cluster0040_Low in some Paneth cells                             |
| AFFX-TransRecMur/.Tfrc |                                           | transferrin receptor                                                                                  | Cluster0040_Low in some Paneth cells                             |
| AFFX-TransRecMur/.Tfrc |                                           | transferrin receptor                                                                                  | Cluster0040_Low in some Paneth cells                             |
| 1456246_x_at           | Tpbpb                                     | trophoblast specific protein beta                                                                     | Cluster0040_Low in some Paneth cells                             |
| 1426142_a_at           | Trdn                                      | triadin                                                                                               | Cluster0040_Low in some Paneth cells                             |
| 1430106_at             | Trp53tg5                                  | transformation related protein 53 target 5                                                            | Cluster0040_Low in some Paneth cells                             |
| 1446342_at             | 2310001H17Rik                             | RIKEN cDNA 2310001H17 gene                                                                            | Cluster0041_High in BAF3 interleukin 3-dependent pro-B cell line |
| 1432118_at             | 2410012E07Rik                             | RIKEN cDNA 2410012E07 gene                                                                            | Cluster0041_High in BAF3 interleukin 3-dependent pro-B cell line |
| 1430214_a_at           | 2610020H08Rik                             | RIKEN cDNA 2610020H08 gene                                                                            | Cluster0041_High in BAF3 interleukin 3-dependent pro-B cell line |
| 1430215_at             | 2610020H08Rik                             | RIKEN cDNA 2610020H08 gene                                                                            | Cluster0041_High in BAF3 interleukin 3-dependent pro-B cell line |
| 1434327_at             | 2610020H08Rik                             | RIKEN cDNA 2610020H08 gene                                                                            | Cluster0041_High in BAF3 interleukin 3-dependent pro-B cell line |
| 1442510_at             | 5830473C10Rik                             | RIKEN cDNA 5830473C10 gene                                                                            | Cluster0041_High in BAF3 interleukin 3-dependent pro-B cell line |
| 1431106_a_at           | 9530053H05Rik                             | RIKEN cDNA 9530053H05 gene                                                                            | Cluster0041_High in BAF3 interleukin 3-dependent pro-B cell line |
| 1454171_x_at           | 9530053H05Rik                             | RIKEN cDNA 9530053H05 gene                                                                            | Cluster0041_High in BAF3 interleukin 3-dependent pro-B cell line |

|              |                        |                                                                                      |                                                                  |
|--------------|------------------------|--------------------------------------------------------------------------------------|------------------------------------------------------------------|
| 1441241_at   | 9630013D21Rik          | RIKEN cDNA 9630013D21 gene                                                           | Cluster0041_High in BAF3 interleukin 3-dependent pro-B cell line |
| 1420516_at   | a                      | nonagouti                                                                            | Cluster0041_High in BAF3 interleukin 3-dependent pro-B cell line |
| 1449588_at   | Abca4                  | ATP-binding cassette, sub-family A (ABC1), member 4                                  | Cluster0041_High in BAF3 interleukin 3-dependent pro-B cell line |
| 1427052_at   | Acacb /// LOC100047358 | acetyl-Coenzyme A carboxylase beta /// similar to acetyl-Coenzyme A carboxylase beta | Cluster0041_High in BAF3 interleukin 3-dependent pro-B cell line |
| 1416645_a_at | Afp                    | alpha fetoprotein                                                                    | Cluster0041_High in BAF3 interleukin 3-dependent pro-B cell line |
| 1416646_at   | Afp                    | alpha fetoprotein                                                                    | Cluster0041_High in BAF3 interleukin 3-dependent pro-B cell line |
| 1436879_x_at | Afp                    | alpha fetoprotein                                                                    | Cluster0041_High in BAF3 interleukin 3-dependent pro-B cell line |
| 1421441_at   | Angpt1                 | angiopoietin 1                                                                       | Cluster0041_High in BAF3 interleukin 3-dependent pro-B cell line |
| 1419215_at   | Aox4                   | aldehyde oxidase 4                                                                   | Cluster0041_High in BAF3 interleukin 3-dependent pro-B cell line |
| 1457323_at   | C030030A07Rik          | RIKEN cDNA C030030A07 gene                                                           | Cluster0041_High in BAF3 interleukin 3-dependent pro-B cell line |
| 1449955_at   | Cacna1f                | calcium channel, voltage-dependent, alpha 1F subunit                                 | Cluster0041_High in BAF3 interleukin 3-dependent pro-B cell line |
| 1460291_at   | Cdk6                   | cyclin-dependent kinase 6                                                            | Cluster0041_High in BAF3 interleukin 3-dependent pro-B cell line |
| 1417614_at   | Ckm                    | creatine kinase, muscle                                                              | Cluster0041_High in BAF3 interleukin 3-dependent pro-B cell line |
| 1422166_at   | Clec2i                 | C-type lectin domain family 2, member i                                              | Cluster0041_High in BAF3 interleukin 3-dependent pro-B cell line |
| 1424725_at   | D16Ertd472e            | DNA segment, Chr 16, ERATO Doi 472, expressed                                        | Cluster0041_High in BAF3 interleukin 3-dependent pro-B cell line |
| 1431216_s_at | Dnajc6                 | DnaJ (Hsp40) homolog, subfamily C, member 6                                          | Cluster0041_High in BAF3 interleukin 3-dependent pro-B cell line |
| 1421407_at   | F2rl2                  | coagulation factor II (thrombin) receptor-like 2                                     | Cluster0041_High in BAF3 interleukin 3-dependent pro-B cell line |
| 1421732_at   | Glrp1                  | glutamine repeat protein 1                                                           | Cluster0041_High in BAF3 interleukin 3-dependent pro-B cell line |
| 1443245_at   | Gm4349                 | SET domain, bifurcated 1 pseudogene                                                  | Cluster0041_High in BAF3 interleukin 3-dependent pro-B cell line |
| 1460130_at   | Gm5544                 | predicted gene 5544                                                                  | Cluster0041_High in BAF3 interleukin 3-dependent pro-B cell line |
| 1427422_at   | Gm6484                 | predicted gene 6484                                                                  | Cluster0041_High in BAF3 interleukin 3-dependent pro-B cell line |
| 1441836_x_at | Gtsf1                  | Gametocyte specific factor 1                                                         | Cluster0041_High in BAF3 interleukin 3-dependent pro-B cell line |
| 1452967_at   | Gtsf1                  | gametocyte specific factor 1                                                         | Cluster0041_High in BAF3 interleukin 3-dependent pro-B cell line |
| 1450170_x_at | H2-D1                  | histocompatibility 2, D region locus 1                                               | Cluster0041_High in BAF3 interleukin 3-dependent pro-B cell line |
| 1424703_at   | Hemk1                  | HemK methyltransferase family member 1                                               | Cluster0041_High in BAF3 interleukin 3-dependent pro-B cell line |
| 1430287_s_at | Hemk1                  | HemK methyltransferase family member 1                                               | Cluster0041_High in BAF3 interleukin 3-dependent pro-B cell line |
| 1422144_at   | Inhbe                  | inhibin beta E                                                                       | Cluster0041_High in BAF3 interleukin 3-dependent pro-B cell line |
| 1438325_at   | Mecom                  | MDS1 and EVI1 complex locus                                                          | Cluster0041_High in BAF3 interleukin 3-dependent pro-B cell line |
| 1418267_at   | Mst1                   | macrophage stimulating 1 (hepatocyte growth factor-like)                             | Cluster0041_High in BAF3 interleukin 3-dependent pro-B cell line |
| 1417155_at   | Mycn                   | v-myc myelocytomatosis viral related oncogene, neuroblastoma derived (avian)         | Cluster0041_High in BAF3 interleukin 3-dependent pro-B cell line |
| 1425922_a_at | Mycn                   | v-myc myelocytomatosis viral related oncogene, neuroblastoma derived (avian)         | Cluster0041_High in BAF3 interleukin 3-dependent pro-B cell line |
| 1439362_at   | NA                     | ---                                                                                  | Cluster0041_High in BAF3 interleukin 3-dependent pro-B cell line |
| 1440665_at   | NA                     | ---                                                                                  | Cluster0041_High in BAF3 interleukin 3-dependent pro-B cell line |
| 1441885_s_at | NA                     | ---                                                                                  | Cluster0041_High in BAF3 interleukin 3-dependent pro-B cell line |
| 1443346_at   | NA                     | ---                                                                                  | Cluster0041_High in BAF3 interleukin 3-dependent pro-B cell line |
| 1456841_at   | NA                     | ---                                                                                  | Cluster0041_High in BAF3 interleukin 3-dependent pro-B cell line |
| 1426410_at   | Pdk3                   | pyruvate dehydrogenase kinase, isoenzyme 3                                           | Cluster0041_High in BAF3 interleukin 3-dependent pro-B cell line |
| 1421566_at   | Pet2                   | plasmacytoma expressed transcript 2                                                  | Cluster0041_High in BAF3 interleukin 3-dependent pro-B cell line |
| 1421704_a_at | Pik3cg                 | phosphatidylinositol 3-kinase, C2 domain containing, gamma polypeptide               | Cluster0041_High in BAF3 interleukin 3-dependent pro-B cell line |
| 1422707_at   | Pik3cg                 | phosphoinositide-3-kinase, catalytic, gamma polypeptide                              | Cluster0041_High in BAF3 interleukin 3-dependent pro-B cell line |
| 1423006_at   | Pim1                   | proviral integration site 1                                                          | Cluster0041_High in BAF3 interleukin 3-dependent pro-B cell line |
| 1417216_at   | Pim2                   | proviral integration site 2                                                          | Cluster0041_High in BAF3 interleukin 3-dependent pro-B cell line |
| 1454187_at   | Pkd1l2                 | polycystic kidney disease 1 like 2                                                   | Cluster0041_High in BAF3 interleukin 3-dependent pro-B cell line |
| 1417396_at   | Podxl                  | podocalyxin-like                                                                     | Cluster0041_High in BAF3 interleukin 3-dependent pro-B cell line |
| 1448688_at   | Podxl                  | podocalyxin-like                                                                     | Cluster0041_High in BAF3 interleukin 3-dependent pro-B cell line |
| 1425169_at   | Prss42                 | protease, serine, 42                                                                 | Cluster0041_High in BAF3 interleukin 3-dependent pro-B cell line |
| 1427170_at   | Psma8                  | proteasome (prosome, macropain) subunit, alpha type, 8                               | Cluster0041_High in BAF3 interleukin 3-dependent pro-B cell line |
| 1434222_at   | Sipa1l1                | signal-induced proliferation-associated 1 like 1                                     | Cluster0041_High in BAF3 interleukin 3-dependent pro-B cell line |
| 1429140_at   | Spns3                  | spinster homolog 3 (Drosophila)                                                      | Cluster0041_High in BAF3 interleukin 3-dependent pro-B cell line |
| 1426105_a_at | Ubxn11                 | UBX domain protein 11                                                                | Cluster0041_High in BAF3 interleukin 3-dependent pro-B cell line |
| 1454897_at   | 6330509M05Rik          | RIKEN cDNA 6330509M05 gene                                                           | Cluster0042_NK cell-related                                      |
| 1455239_at   | 6330512M04Rik          | RIKEN cDNA 6330512M04 gene                                                           | Cluster0042_NK cell-related                                      |
| 1460745_at   | A630038E17Rik          | RIKEN cDNA A630038E17 gene                                                           | Cluster0042_NK cell-related                                      |
| 1436895_at   | Arap2                  | ArfGAP with RhoGAP domain, ankyrin repeat and PH domain 2                            | Cluster0042_NK cell-related                                      |
| 1456337_at   | Arap2                  | ArfGAP with RhoGAP domain, ankyrin repeat and PH domain 2                            | Cluster0042_NK cell-related                                      |
| 1444128_at   | Arhgap26               | Rho GTPase activating protein 26                                                     | Cluster0042_NK cell-related                                      |
| 1434671_at   | B230337E12Rik          | RIKEN cDNA B230337E12 gene                                                           | Cluster0042_NK cell-related                                      |

|              |                  |                                                                                                                     |                                 |
|--------------|------------------|---------------------------------------------------------------------------------------------------------------------|---------------------------------|
| 1427509_at   | Baiap3           | BAI1-associated protein 3                                                                                           | Cluster0042_NK cell-related     |
| 1445196_at   | C79595           | expressed sequence C79595                                                                                           | Cluster0042_NK cell-related     |
| 1456847_at   | Cd160            | CD160 antigen                                                                                                       | Cluster0042_NK cell-related     |
| 1422632_at   | Ctsw             | cathepsin W                                                                                                         | Cluster0042_NK cell-related     |
| 1441045_at   | Ddx43            | DEAD (Asp-Glu-Ala-Asp) box polypeptide 43                                                                           | Cluster0042_NK cell-related     |
| 1426001_at   | Eomes            | eomesodermin homolog (Xenopus laevis)                                                                               | Cluster0042_NK cell-related     |
| 1435172_at   | Eomes            | eomesodermin homolog (Xenopus laevis)                                                                               | Cluster0042_NK cell-related     |
| 1449235_at   | Fasl             | Fas ligand (TNF superfamily, member 6)                                                                              | Cluster0042_NK cell-related     |
| 1450886_at   | Gsg2             | germ cell-specific gene 2                                                                                           | Cluster0042_NK cell-related     |
| 1421628_at   | Il18r1           | interleukin 18 receptor 1                                                                                           | Cluster0042_NK cell-related     |
| 1421291_at   | Il18rap          | interleukin 18 receptor accessory protein                                                                           | Cluster0042_NK cell-related     |
| 1456545_at   | Il18rap          | interleukin 18 receptor accessory protein                                                                           | Cluster0042_NK cell-related     |
| 1418142_at   | Kcnj8            | potassium inwardly-rectifying channel, subfamily J, member 8                                                        | Cluster0042_NK cell-related     |
| 1434163_at   | Khdc1b           | KH domain containing 1B                                                                                             | Cluster0042_NK cell-related     |
| 1434164_s_at | Khdc1b           | KH domain containing 1B                                                                                             | Cluster0042_NK cell-related     |
| 1452645_x_at | Klra1 /// Klra22 | killer cell lectin-like receptor, subfamily A, member 1 /// killer cell lectin-like receptor subfamily A, member 22 | Cluster0042_NK cell-related     |
| 1425453_x_at | Klra12           | killer cell lectin-like receptor subfamily A, member 12                                                             | Cluster0042_NK cell-related     |
| 1426127_x_at | Klra18           | killer cell lectin-like receptor, subfamily A, member 18                                                            | Cluster0042_NK cell-related     |
| 1425436_x_at | Klra3 /// Klra9  | killer cell lectin-like receptor, subfamily A, member 3 /// killer cell lectin-like receptor subfamily A, member 9  | Cluster0042_NK cell-related     |
| 1426171_x_at | Klra7            | killer cell lectin-like receptor, subfamily A, member 7                                                             | Cluster0042_NK cell-related     |
| 1425417_x_at | Klra8            | killer cell lectin-like receptor, subfamily A, member 8                                                             | Cluster0042_NK cell-related     |
| 1450296_at   | Klrb1a           | killer cell lectin-like receptor subfamily B member 1A                                                              | Cluster0042_NK cell-related     |
| 1449570_at   | Klrb1c           | killer cell lectin-like receptor subfamily B member 1C                                                              | Cluster0042_NK cell-related     |
| 1425962_at   | Klrb1f           | killer cell lectin-like receptor subfamily B member 1F                                                              | Cluster0042_NK cell-related     |
| 1457722_at   | Klrb1f           | killer cell lectin-like receptor subfamily B member 1F                                                              | Cluster0042_NK cell-related     |
| 1425005_at   | Klrc1            | killer cell lectin-like receptor subfamily C, member 1                                                              | Cluster0042_NK cell-related     |
| 1421795_s_at | Klrc2 /// Klrc3  | killer cell lectin-like receptor subfamily C, member 2 /// killer cell lectin-like receptor subfamily C, member 3   | Cluster0042_NK cell-related     |
| 1460245_at   | Klrd1            | killer cell lectin-like receptor, subfamily D, member 1                                                             | Cluster0042_NK cell-related     |
| 1458642_at   | Klre1            | killer cell lectin-like receptor family E member 1                                                                  | Cluster0042_NK cell-related     |
| 1450495_a_at | Klrk1            | killer cell lectin-like receptor subfamily K, member 1                                                              | Cluster0042_NK cell-related     |
| 1438797_at   | NA               | ---                                                                                                                 | Cluster0042_NK cell-related     |
| 1442350_at   | NA               | ---                                                                                                                 | Cluster0042_NK cell-related     |
| 1443937_at   | NA               | ---                                                                                                                 | Cluster0042_NK cell-related     |
| 1444275_at   | NA               | ---                                                                                                                 | Cluster0042_NK cell-related     |
| 1444600_at   | NA               | ---                                                                                                                 | Cluster0042_NK cell-related     |
| 1446649_at   | NA               | ---                                                                                                                 | Cluster0042_NK cell-related     |
| 1458173_at   | NA               | ---                                                                                                                 | Cluster0042_NK cell-related     |
| 1459870_x_at | NA               | ---                                                                                                                 | Cluster0042_NK cell-related     |
| 1444466_at   | Ncald            | Neurocalcin delta                                                                                                   | Cluster0042_NK cell-related     |
| 1422089_at   | Ncr1             | natural cytotoxicity triggering receptor 1                                                                          | Cluster0042_NK cell-related     |
| 1450753_at   | Nkg7             | natural killer cell group 7 sequence                                                                                | Cluster0042_NK cell-related     |
| 1438724_at   | Osbp13           | oxysterol binding protein-like 3                                                                                    | Cluster0042_NK cell-related     |
| 1439806_at   | Pogk             | Pogo transposable element with KRAB domain                                                                          | Cluster0042_NK cell-related     |
| 1451862_a_at | Prf1             | perforin 1 (pore forming protein)                                                                                   | Cluster0042_NK cell-related     |
| 1452834_at   | Prr51            | proline rich 5 like                                                                                                 | Cluster0042_NK cell-related     |
| 1449365_at   | S1pr5            | sphingosine-1-phosphate receptor 5                                                                                  | Cluster0042_NK cell-related     |
| 1422804_at   | Serp1nb6b        | serine (or cysteine) peptidase inhibitor, clade B, member 6b                                                        | Cluster0042_NK cell-related     |
| 1430058_at   | Slbp             | stem-loop binding protein                                                                                           | Cluster0042_NK cell-related     |
| 1449361_at   | Tbx21            | T-box 21                                                                                                            | Cluster0042_NK cell-related     |
| 1432566_at   | Tmsb15a          | thymosin beta 15a                                                                                                   | Cluster0042_NK cell-related     |
| 1438044_at   | 1700047M11Rik    | RIKEN cDNA 1700047M11 gene                                                                                          | Cluster0043_Granulocyte-related |
| 1430466_at   | 2310005G13Rik    | RIKEN cDNA 2310005G13 gene                                                                                          | Cluster0043_Granulocyte-related |
| 1433284_at   | 4921522E08Rik    | RIKEN cDNA 4921522E08 gene                                                                                          | Cluster0043_Granulocyte-related |
| 1419242_at   | 9530002B09Rik    | RIKEN cDNA 9530002B09 gene                                                                                          | Cluster0043_Granulocyte-related |
| 1457389_at   | 9830166K06Rik    | RIKEN cDNA 9830166K06 gene                                                                                          | Cluster0043_Granulocyte-related |
| 1440370_at   | Abca13           | ATP-binding cassette, sub-family A (ABC1), member 13                                                                | Cluster0043_Granulocyte-related |
| 1451704_at   | Abpd             | androgen binding protein delta                                                                                      | Cluster0043_Granulocyte-related |

|              |                                        |                                                                                                                     |                                 |
|--------------|----------------------------------------|---------------------------------------------------------------------------------------------------------------------|---------------------------------|
| 1417765_a_at | Amy1                                   | amylase 1, salivary                                                                                                 | Cluster0043_Granulocyte-related |
| 1453239_a_at | Ankrd22                                | ankyrin repeat domain 22                                                                                            | Cluster0043_Granulocyte-related |
| 1421803_at   | Apbh                                   | androgen-binding protein eta                                                                                        | Cluster0043_Granulocyte-related |
| 1452732_at   | Asprv1                                 | aspartic peptidase, retroviral-like 1                                                                               | Cluster0043_Granulocyte-related |
| 1441395_at   | AU021933                               | expressed sequence AU021933                                                                                         | Cluster0043_Granulocyte-related |
| 1424664_at   | BC017647                               | cDNA sequence BC017647                                                                                              | Cluster0043_Granulocyte-related |
| 1455114_at   | Ccno                                   | cyclin O                                                                                                            | Cluster0043_Granulocyte-related |
| 1451537_at   | Chi3l1                                 | chitinase 3-like 1                                                                                                  | Cluster0043_Granulocyte-related |
| 1416456_a_at | Chia                                   | chitinase, acidic                                                                                                   | Cluster0043_Granulocyte-related |
| 1426606_at   | Crtac1                                 | cartilage acidic protein 1                                                                                          | Cluster0043_Granulocyte-related |
| 1452936_at   | Crtac1                                 | cartilage acidic protein 1                                                                                          | Cluster0043_Granulocyte-related |
| 1449447_at   | Cst10                                  | cystatin 10 (chondrocytes)                                                                                          | Cluster0043_Granulocyte-related |
| 1421734_at   | Cxcr2                                  | chemokine (C-X-C motif) receptor 2                                                                                  | Cluster0043_Granulocyte-related |
| 1459725_s_at | Dcpp1 /// Dcpp2 /// Dcpp3 /// LOC10004 | demilune cell and parotid protein 1 /// demilune cell and parotid protein 2 /// demilune cell and parotid protein 3 | Cluster0043_Granulocyte-related |
| 1432892_at   | Dhrs7                                  | dehydrogenase/reductase (SDR family) member 7                                                                       | Cluster0043_Granulocyte-related |
| 1422318_at   | Foxd4                                  | forkhead box D4                                                                                                     | Cluster0043_Granulocyte-related |
| 1425398_at   | Gm11277 /// Gm13646                    | predicted gene 11277 /// predicted gene 13646                                                                       | Cluster0043_Granulocyte-related |
| 1442588_at   | Gm5101                                 | predicted gene 5101                                                                                                 | Cluster0043_Granulocyte-related |
| 1425137_a_at | H2-Q10                                 | histocompatibility 2, Q region locus 10                                                                             | Cluster0043_Granulocyte-related |
| 1427365_at   | Krt86                                  | keratin 86                                                                                                          | Cluster0043_Granulocyte-related |
| 1415846_a_at | Ldhc                                   | lactate dehydrogenase C                                                                                             | Cluster0043_Granulocyte-related |
| 1415847_at   | Ldhc                                   | lactate dehydrogenase C                                                                                             | Cluster0043_Granulocyte-related |
| 1443136_at   | LOC432459                              | hypothetical gene supported by AK082906                                                                             | Cluster0043_Granulocyte-related |
| 1435660_at   | LOC664787                              | similar to Sp110 nuclear body protein                                                                               | Cluster0043_Granulocyte-related |
| 1424977_at   | Lrrc67                                 | leucine rich repeat containing 67                                                                                   | Cluster0043_Granulocyte-related |
| 1451858_at   | Mrgpra2a /// Mrgpra2b                  | MAS-related GPR, member A2A /// MAS-related GPR, member A2B                                                         | Cluster0043_Granulocyte-related |
| 1448394_at   | Myl2                                   | myosin, light polypeptide 2, regulatory, cardiac, slow                                                              | Cluster0043_Granulocyte-related |
| 1442209_at   | NA                                     | ---                                                                                                                 | Cluster0043_Granulocyte-related |
| 1444056_at   | NA                                     | ---                                                                                                                 | Cluster0043_Granulocyte-related |
| 1444459_at   | NA                                     | ---                                                                                                                 | Cluster0043_Granulocyte-related |
| 1446418_at   | NA                                     | ---                                                                                                                 | Cluster0043_Granulocyte-related |
| 1454311_at   | NA                                     | ---                                                                                                                 | Cluster0043_Granulocyte-related |
| 1458064_at   | NA                                     | ---                                                                                                                 | Cluster0043_Granulocyte-related |
| 1440921_at   | Nlrp12                                 | NLR family, pyrin domain containing 12                                                                              | Cluster0043_Granulocyte-related |
| 1443970_at   | Ntrk3                                  | neurotrophic tyrosine kinase, receptor, type 3                                                                      | Cluster0043_Granulocyte-related |
| 1452922_at   | Ppp1r3d                                | protein phosphatase 1, regulatory subunit 3D                                                                        | Cluster0043_Granulocyte-related |
| 1419681_a_at | Prok2                                  | prokineticin 2                                                                                                      | Cluster0043_Granulocyte-related |
| 1449587_a_at | Prol1                                  | proline rich, lacrimal 1                                                                                            | Cluster0043_Granulocyte-related |
| 1453203_at   | Prps11                                 | phosphoribosyl pyrophosphate synthetase 1-like 1                                                                    | Cluster0043_Granulocyte-related |
| 1419348_at   | Psp                                    | parotid secretory protein                                                                                           | Cluster0043_Granulocyte-related |
| 1440428_at   | Sfxn5                                  | sideroflexin 5                                                                                                      | Cluster0043_Granulocyte-related |
| 1458933_at   | Slc22a15                               | solute carrier family 22 (organic anion/cation transporter), member 15                                              | Cluster0043_Granulocyte-related |
| 1437870_at   | Slco4c1                                | solute carrier organic anion transporter family, member 4C1                                                         | Cluster0043_Granulocyte-related |
| 1460616_at   | Slco4c1                                | solute carrier organic anion transporter family, member 4C1                                                         | Cluster0043_Granulocyte-related |
| 1448168_a_at | Spt1                                   | salivary protein 1                                                                                                  | Cluster0043_Granulocyte-related |
| 1442339_at   | Stfa2l1                                | stefin A2 like 1                                                                                                    | Cluster0043_Granulocyte-related |
| 1444122_at   | Sycp2                                  | synaptonemal complex protein 2                                                                                      | Cluster0043_Granulocyte-related |
| 1447284_at   | Trem1                                  | triggering receptor expressed on myeloid cells 1                                                                    | Cluster0043_Granulocyte-related |
| 1460282_at   | Trem1                                  | triggering receptor expressed on myeloid cells 1                                                                    | Cluster0043_Granulocyte-related |
| 1430403_at   | Usp32                                  | ubiquitin specific peptidase 32                                                                                     | Cluster0043_Granulocyte-related |
| 1457375_at   | 2210016F16Rik                          | RIKEN cDNA 2210016F16 gene                                                                                          | Cluster0044_Low in many         |
| 1460532_at   | 2900011F02Rik                          | RIKEN cDNA 2900011F02 gene                                                                                          | Cluster0044_Low in many         |
| 1454510_at   | 2900034C19Rik                          | RIKEN cDNA 2900034C19 gene                                                                                          | Cluster0044_Low in many         |
| 1454443_at   | 4833411I10Rik                          | RIKEN cDNA 4833411I10 gene                                                                                          | Cluster0044_Low in many         |
| 1430115_at   | 4833413E03Rik                          | RIKEN cDNA 4833413E03 gene                                                                                          | Cluster0044_Low in many         |
| 1453978_at   | 4921522H14Rik                          | RIKEN cDNA 4921522H14 gene                                                                                          | Cluster0044_Low in many         |
| 1431508_at   | 4930423M02Rik                          | RIKEN cDNA 4930423M02 gene                                                                                          | Cluster0044_Low in many         |

|              |               |                                                                       |                                     |
|--------------|---------------|-----------------------------------------------------------------------|-------------------------------------|
| 1433197_at   | 4930445B03Rik | RIKEN cDNA 4930445B03 gene                                            | Cluster0044_Low in many             |
| 1432067_at   | 4930473O22Rik | RIKEN cDNA 4930473O22 gene                                            | Cluster0044_Low in many             |
| 1433316_at   | 4930477O15Rik | RIKEN cDNA 4930477O15 gene                                            | Cluster0044_Low in many             |
| 1430919_at   | 4930525F21Rik | RIKEN cDNA 4930525F21 gene                                            | Cluster0044_Low in many             |
| 1432277_at   | 4930565D16Rik | RIKEN cDNA 4930565D16 gene                                            | Cluster0044_Low in many             |
| 1433329_at   | 4930573C08Rik | RIKEN cDNA 4930573C08 gene                                            | Cluster0044_Low in many             |
| 1454411_at   | 4933406F09Rik | RIKEN cDNA 4933406F09 gene                                            | Cluster0044_Low in many             |
| 1432040_at   | 4933417O13Rik | RIKEN cDNA 4933417O13 gene                                            | Cluster0044_Low in many             |
| 1447310_at   | Agphd1        | aminoglycoside phosphotransferase domain containing 1                 | Cluster0044_Low in many             |
| 1432104_a_at | Allc          | allantoicase                                                          | Cluster0044_Low in many             |
| 1445240_at   | AU019796      | expressed sequence AU019796                                           | Cluster0044_Low in many             |
| 1459501_at   | AU022194      | expressed sequence AU022194                                           | Cluster0044_Low in many             |
| 1459685_at   | C77683        | expressed sequence C77683                                             | Cluster0044_Low in many             |
| 1451826_at   | Cabp5         | calcium binding protein 5                                             | Cluster0044_Low in many             |
| 1431155_at   | Camsap11      | calmodulin regulated spectrin-associated protein 1-like 1             | Cluster0044_Low in many             |
| 1428606_at   | Ccdc124       | coiled-coil domain containing 124                                     | Cluster0044_Low in many             |
| 1451842_a_at | Chrn3         | cholinergic receptor, nicotinic, beta polypeptide 3                   | Cluster0044_Low in many             |
| 1460422_at   | D0Kist5       | DNA segment, KIST 5                                                   | Cluster0044_Low in many             |
| 1459280_at   | D1Ert185e     | DNA segment, Chr 1, ERATO Doi 185, expressed                          | Cluster0044_Low in many             |
| 1428204_at   | Gabrb2        | gamma-aminobutyric acid (GABA) A receptor, subunit beta 2             | Cluster0044_Low in many             |
| 1428205_x_at | Gabrb2        | gamma-aminobutyric acid (GABA) A receptor, subunit beta 2             | Cluster0044_Low in many             |
| 1446359_at   | Gnal          | guanine nucleotide binding protein, alpha stimulating, olfactory type | Cluster0044_Low in many             |
| 1444661_at   | Gpr26         | G protein-coupled receptor 26                                         | Cluster0044_Low in many             |
| 1422423_at   | Magea7        | melanoma antigen, family A, 7                                         | Cluster0044_Low in many             |
| 1421590_at   | Mrgprh        | MAS-related GPR, member H                                             | Cluster0044_Low in many             |
| 1456876_at   | Mypop         | Myb-related transcription factor, partner of profilin                 | Cluster0044_Low in many             |
| 1425446_at   | NA            | ---                                                                   | Cluster0044_Low in many             |
| 1433021_at   | NA            | ---                                                                   | Cluster0044_Low in many             |
| 1442390_at   | NA            | ---                                                                   | Cluster0044_Low in many             |
| 1443674_at   | NA            | ---                                                                   | Cluster0044_Low in many             |
| 1445112_at   | NA            | ---                                                                   | Cluster0044_Low in many             |
| 1445730_at   | NA            | ---                                                                   | Cluster0044_Low in many             |
| 1445762_at   | NA            | ---                                                                   | Cluster0044_Low in many             |
| 1449768_at   | NA            | ---                                                                   | Cluster0044_Low in many             |
| 1449787_at   | NA            | ---                                                                   | Cluster0044_Low in many             |
| 1452229_at   | NA            | ---                                                                   | Cluster0044_Low in many             |
| 1458860_at   | NA            | ---                                                                   | Cluster0044_Low in many             |
| 1459282_at   | NA            | ---                                                                   | Cluster0044_Low in many             |
| 1459596_at   | NA            | ---                                                                   | Cluster0044_Low in many             |
| 1459775_at   | NA            | ---                                                                   | Cluster0044_Low in many             |
| 1459776_x_at | NA            | ---                                                                   | Cluster0044_Low in many             |
| 1450195_at   | Ndst4         | N-deacetylase/N-sulfotransferase (heparin glucosaminyl) 4             | Cluster0044_Low in many             |
| 1422108_at   | Ppp1r3a       | protein phosphatase 1, regulatory (inhibitor) subunit 3A              | Cluster0044_Low in many             |
| 1449805_at   | Prss29        | Protease, serine, 29                                                  | Cluster0044_Low in many             |
| 1443982_at   | Rgnef         | Rho-guanine nucleotide exchange factor                                | Cluster0044_Low in many             |
| 1437949_x_at | Rnf114        | ring finger protein 114                                               | Cluster0044_Low in many             |
| 1450605_at   | Tas2r108      | taste receptor, type 2, member 108                                    | Cluster0044_Low in many             |
| 1451373_at   | Ugt3a1        | UDP glycosyltransferases 3 family, polypeptide A1                     | Cluster0044_Low in many             |
| 1435378_at   | 2210020M01Rik | RIKEN cDNA 2210020M01 gene                                            | Cluster0045_Plasmacytoid DC-related |
| 1439112_at   | 2810442I21Rik | RIKEN cDNA 2810442I21 gene                                            | Cluster0045_Plasmacytoid DC-related |
| 1440541_at   | 2810442I21Rik | RIKEN cDNA 2810442I21 gene                                            | Cluster0045_Plasmacytoid DC-related |
| 1442903_at   | 4732423E21Rik | RIKEN cDNA 4732423E21 gene                                            | Cluster0045_Plasmacytoid DC-related |
| 1430218_at   | 4933424M12Rik | RIKEN cDNA 4933424M12 gene                                            | Cluster0045_Plasmacytoid DC-related |
| 1460524_at   | 6430711C07Rik | RIKEN cDNA 6430711C07 gene                                            | Cluster0045_Plasmacytoid DC-related |
| 1450248_at   | Adam11        | a disintegrin and metallopeptidase domain 11                          | Cluster0045_Plasmacytoid DC-related |
| 1455270_at   | Adam11        | a disintegrin and metallopeptidase domain 11                          | Cluster0045_Plasmacytoid DC-related |
| 1457372_at   | AW121686      | expressed sequence AW121686                                           | Cluster0045_Plasmacytoid DC-related |

|              |                                             |                                                                                                                                    |                                              |
|--------------|---------------------------------------------|------------------------------------------------------------------------------------------------------------------------------------|----------------------------------------------|
| 1421919_a_at | Ccr9                                        | chemokine (C-C motif) receptor 9                                                                                                   | Cluster0045_Plasmacytoid DC-related          |
| 1421920_a_at | Ccr9                                        | chemokine (C-C motif) receptor 9                                                                                                   | Cluster0045_Plasmacytoid DC-related          |
| 1427419_x_at | Ccr9                                        | chemokine (C-C motif) receptor 9                                                                                                   | Cluster0045_Plasmacytoid DC-related          |
| 1436065_at   | Ccr9                                        | chemokine (C-C motif) receptor 9                                                                                                   | Cluster0045_Plasmacytoid DC-related          |
| 1426183_a_at | Cd209d                                      | CD209d antigen                                                                                                                     | Cluster0045_Plasmacytoid DC-related          |
| 1431575_at   | Clec4g                                      | C-type lectin domain family 4, member g                                                                                            | Cluster0045_Plasmacytoid DC-related          |
| 1417607_at   | Cox6a2                                      | cytochrome c oxidase, subunit VI a, polypeptide 2                                                                                  | Cluster0045_Plasmacytoid DC-related          |
| 1457633_x_at | Cox6a2                                      | cytochrome c oxidase, subunit VI a, polypeptide 2                                                                                  | Cluster0045_Plasmacytoid DC-related          |
| 1439771_s_at | D13Ert608e                                  | DNA segment, Chr 13, ERATO Doi 608, expressed                                                                                      | Cluster0045_Plasmacytoid DC-related          |
| 1429099_at   | Duxbl /// Gm10394                           | double homeobox B-like /// predicted gene 10394                                                                                    | Cluster0045_Plasmacytoid DC-related          |
| 1445710_x_at | Duxbl /// Gm10394                           | double homeobox B-like /// predicted gene 10394                                                                                    | Cluster0045_Plasmacytoid DC-related          |
| 1440072_at   | E430022K19Rik                               | RIKEN cDNA E430022K19 gene                                                                                                         | Cluster0045_Plasmacytoid DC-related          |
| 1445856_at   | Fam178a                                     | family with sequence similarity 178, member A                                                                                      | Cluster0045_Plasmacytoid DC-related          |
| 1420455_at   | Gcm2                                        | glial cells missing homolog 2 (Drosophila)                                                                                         | Cluster0045_Plasmacytoid DC-related          |
| 1459002_at   | Gm10045 /// Gm10155 /// Gm10163 /// Gm10072 | predicted pseudogene 10045 /// predicted gene 10155 /// predicted pseudogene 10163 /// predicted gene 10072                        | Cluster0045_Plasmacytoid DC-related          |
| 1441304_at   | Gm10072 /// Gm16382 /// Gm9154 /// Rm10072  | ribosomal protein L31 pseudogene /// ribosomal protein L31 pseudogene /// predicted gene 9154 /// ribosomal protein L31 pseudogene | Cluster0045_Plasmacytoid DC-related          |
| 1447033_at   | Gm829                                       | predicted gene 829                                                                                                                 | Cluster0045_Plasmacytoid DC-related          |
| 1421530_a_at | Grm8                                        | glutamate receptor, metabotropic 8                                                                                                 | Cluster0045_Plasmacytoid DC-related          |
| 1434716_at   | Havcr1                                      | hepatitis A virus cellular receptor 1                                                                                              | Cluster0045_Plasmacytoid DC-related          |
| 1450364_a_at | Havcr1                                      | hepatitis A virus cellular receptor 1                                                                                              | Cluster0045_Plasmacytoid DC-related          |
| 1455712_at   | Hist3h2a                                    | histone cluster 3, H2a                                                                                                             | Cluster0045_Plasmacytoid DC-related          |
| 1421587_at   | Klk1b27                                     | kallikrein 1-related peptidase b27                                                                                                 | Cluster0045_Plasmacytoid DC-related          |
| 1425888_at   | Klra17                                      | killer cell lectin-like receptor, subfamily A, member 17                                                                           | Cluster0045_Plasmacytoid DC-related          |
| 1457707_at   | Mctp2                                       | multiple C2 domains, transmembrane 2                                                                                               | Cluster0045_Plasmacytoid DC-related          |
| 1438295_at   | NA                                          | ---                                                                                                                                | Cluster0045_Plasmacytoid DC-related          |
| 1440106_at   | NA                                          | ---                                                                                                                                | Cluster0045_Plasmacytoid DC-related          |
| 1441760_at   | NA                                          | ---                                                                                                                                | Cluster0045_Plasmacytoid DC-related          |
| 1446104_at   | NA                                          | ---                                                                                                                                | Cluster0045_Plasmacytoid DC-related          |
| 1446386_at   | NA                                          | ---                                                                                                                                | Cluster0045_Plasmacytoid DC-related          |
| 1446605_at   | NA                                          | ---                                                                                                                                | Cluster0045_Plasmacytoid DC-related          |
| 1447502_at   | NA                                          | ---                                                                                                                                | Cluster0045_Plasmacytoid DC-related          |
| 1451885_at   | NA                                          | ---                                                                                                                                | Cluster0045_Plasmacytoid DC-related          |
| 1457786_at   | NA                                          | ---                                                                                                                                | Cluster0045_Plasmacytoid DC-related          |
| 1458629_at   | NA                                          | ---                                                                                                                                | Cluster0045_Plasmacytoid DC-related          |
| 1459139_at   | NA                                          | ---                                                                                                                                | Cluster0045_Plasmacytoid DC-related          |
| 1459518_at   | NA                                          | ---                                                                                                                                | Cluster0045_Plasmacytoid DC-related          |
| 1460108_at   | NA                                          | ---                                                                                                                                | Cluster0045_Plasmacytoid DC-related          |
| 1443632_at   | Obscn                                       | obscurin, cytoskeletal calmodulin and titin-interacting RhoGEF                                                                     | Cluster0045_Plasmacytoid DC-related          |
| 1422656_at   | Rasl2-9                                     | RAS-like, family 2, locus 9                                                                                                        | Cluster0045_Plasmacytoid DC-related          |
| 1447101_at   | Rnf122                                      | ring finger protein 122                                                                                                            | Cluster0045_Plasmacytoid DC-related          |
| 1451785_at   | Rpgrip1                                     | retinitis pigmentosa GTPase regulator interacting protein 1                                                                        | Cluster0045_Plasmacytoid DC-related          |
| 1454231_a_at | Rpgrip1                                     | retinitis pigmentosa GTPase regulator interacting protein 1                                                                        | Cluster0045_Plasmacytoid DC-related          |
| 1426034_a_at | Runx2                                       | runt related transcription factor 2                                                                                                | Cluster0045_Plasmacytoid DC-related          |
| 1436131_at   | Siglech                                     | sialic acid binding Ig-like lectin H                                                                                               | Cluster0045_Plasmacytoid DC-related          |
| 1426518_at   | Tubgcp5                                     | tubulin, gamma complex associated protein 5                                                                                        | Cluster0045_Plasmacytoid DC-related          |
| 1453089_at   | 3110079O15Rik                               | RIKEN cDNA 3110079O15 gene                                                                                                         | Cluster0046_Chondrocyte & osteoblast-related |
| 1424838_at   | A330049M08Rik                               | RIKEN cDNA A330049M08 gene                                                                                                         | Cluster0046_Chondrocyte & osteoblast-related |
| 1449827_at   | Acan                                        | aggrecan                                                                                                                           | Cluster0046_Chondrocyte & osteoblast-related |
| 1435022_at   | Alx1                                        | ALX homeobox 1                                                                                                                     | Cluster0046_Chondrocyte & osteoblast-related |
| 1456454_at   | Alx1                                        | ALX homeobox 1                                                                                                                     | Cluster0046_Chondrocyte & osteoblast-related |
| 1451478_at   | Angptl7                                     | angiopoietin-like 7                                                                                                                | Cluster0046_Chondrocyte & osteoblast-related |
| 1423422_at   | Asb4                                        | ankyrin repeat and SOCS box-containing 4                                                                                           | Cluster0046_Chondrocyte & osteoblast-related |
| 1433919_at   | Asb4                                        | ankyrin repeat and SOCS box-containing 4                                                                                           | Cluster0046_Chondrocyte & osteoblast-related |
| 1421282_at   | Bmp5                                        | bone morphogenetic protein 5                                                                                                       | Cluster0046_Chondrocyte & osteoblast-related |
| 1421283_at   | Bmp5                                        | bone morphogenetic protein 5                                                                                                       | Cluster0046_Chondrocyte & osteoblast-related |
| 1422253_at   | Col10a1                                     | collagen, type X, alpha 1                                                                                                          | Cluster0046_Chondrocyte & osteoblast-related |
| 1423578_at   | Col11a2                                     | collagen, type XI, alpha 2                                                                                                         | Cluster0046_Chondrocyte & osteoblast-related |



|              |               |                                                                                      |                                              |
|--------------|---------------|--------------------------------------------------------------------------------------|----------------------------------------------|
| 1450567_a_at | Col2a1        | collagen, type II, alpha 1                                                           | Cluster0046_Chondrocyte & osteoblast-related |
| 1421381_a_at | Col9a1        | collagen, type IX, alpha 1                                                           | Cluster0046_Chondrocyte & osteoblast-related |
| 1428571_at   | Col9a1        | collagen, type IX, alpha 1                                                           | Cluster0046_Chondrocyte & osteoblast-related |
| 1450673_at   | Col9a2        | collagen, type IX, alpha 2                                                           | Cluster0046_Chondrocyte & osteoblast-related |
| 1460693_a_at | Col9a3        | collagen, type IX, alpha 3                                                           | Cluster0046_Chondrocyte & osteoblast-related |
| 1460734_at   | Col9a3        | collagen, type IX, alpha 3                                                           | Cluster0046_Chondrocyte & osteoblast-related |
| 1419527_at   | Comp          | cartilage oligomeric matrix protein                                                  | Cluster0046_Chondrocyte & osteoblast-related |
| 1456793_at   | Cyt11         | cytokine-like 1                                                                      | Cluster0046_Chondrocyte & osteoblast-related |
| 1420807_a_at | Dlk2          | delta-like 2 homolog (Drosophila)                                                    | Cluster0046_Chondrocyte & osteoblast-related |
| 1450005_x_at | Dlk2          | delta-like 2 homolog (Drosophila)                                                    | Cluster0046_Chondrocyte & osteoblast-related |
| 1419376_at   | Fibin         | fin bud initiation factor homolog (zebrafish)                                        | Cluster0046_Chondrocyte & osteoblast-related |
| 1421633_a_at | Hapln1        | hyaluronan and proteoglycan link protein 1                                           | Cluster0046_Chondrocyte & osteoblast-related |
| 1426294_at   | Hapln1        | hyaluronan and proteoglycan link protein 1                                           | Cluster0046_Chondrocyte & osteoblast-related |
| 1426295_at   | Hapln1        | hyaluronan and proteoglycan link protein 1                                           | Cluster0046_Chondrocyte & osteoblast-related |
| 1427361_at   | Hoxc6         | homeobox C6                                                                          | Cluster0046_Chondrocyte & osteoblast-related |
| 1427362_x_at | Hoxc6         | homeobox C6                                                                          | Cluster0046_Chondrocyte & osteoblast-related |
| 1452412_at   | Hoxc8         | homeobox C8                                                                          | Cluster0046_Chondrocyte & osteoblast-related |
| 1420537_at   | Kctd4         | potassium channel tetramerisation domain containing 4                                | Cluster0046_Chondrocyte & osteoblast-related |
| 1460236_at   | Klk10         | kallikrein related-peptidase 10                                                      | Cluster0046_Chondrocyte & osteoblast-related |
| 1460258_at   | Lect1         | leukocyte cell derived chemotaxin 1                                                  | Cluster0046_Chondrocyte & osteoblast-related |
| 1421153_at   | Loxl4         | lysyl oxidase-like 4                                                                 | Cluster0046_Chondrocyte & osteoblast-related |
| 1450134_at   | Loxl4         | lysyl oxidase-like 4                                                                 | Cluster0046_Chondrocyte & osteoblast-related |
| 1447547_at   | Ltbp1         | latent transforming growth factor beta binding protein 1                             | Cluster0046_Chondrocyte & osteoblast-related |
| 1418477_at   | Matn1         | matrilin 1, cartilage matrix protein                                                 | Cluster0046_Chondrocyte & osteoblast-related |
| 1422148_at   | Matn3         | matrilin 3                                                                           | Cluster0046_Chondrocyte & osteoblast-related |
| 1455948_x_at | Matn3         | matrilin 3                                                                           | Cluster0046_Chondrocyte & osteoblast-related |
| 1419755_at   | Mfi2          | antigen p97 (melanoma associated) identified by monoclonal antibodies 133.2 and 96.5 | Cluster0046_Chondrocyte & osteoblast-related |
| 1422643_at   | Moxd1         | monooxygenase, DBH-like 1                                                            | Cluster0046_Chondrocyte & osteoblast-related |
| 1436399_s_at | Nrk           | Nik related kinase                                                                   | Cluster0046_Chondrocyte & osteoblast-related |
| 1456073_s_at | Panx3         | pannexin 3                                                                           | Cluster0046_Chondrocyte & osteoblast-related |
| 1426981_at   | Pcsk6         | proprotein convertase subtilisin/kexin type 6                                        | Cluster0046_Chondrocyte & osteoblast-related |
| 1450533_a_at | Plagl1        | pleiomorphic adenoma gene-like 1                                                     | Cluster0046_Chondrocyte & osteoblast-related |
| 1426225_at   | Rbp4          | retinol binding protein 4, plasma                                                    | Cluster0046_Chondrocyte & osteoblast-related |
| 1429661_at   | Rhobtb3       | Rho-related BTB domain containing 3                                                  | Cluster0046_Chondrocyte & osteoblast-related |
| 1447869_x_at | Rhobtb3       | Rho-related BTB domain containing 3                                                  | Cluster0046_Chondrocyte & osteoblast-related |
| 1437387_at   | Susd5         | sushi domain containing 5                                                            | Cluster0046_Chondrocyte & osteoblast-related |
| 1438636_s_at | Susd5         | sushi domain containing 5                                                            | Cluster0046_Chondrocyte & osteoblast-related |
| 1428993_at   | Ucma          | upper zone of growth plate and cartilage matrix associated                           | Cluster0046_Chondrocyte & osteoblast-related |
| 1428994_s_at | Ucma          | upper zone of growth plate and cartilage matrix associated                           | Cluster0046_Chondrocyte & osteoblast-related |
| 1460657_at   | Wnt10a        | wingless related MMTV integration site 10a                                           | Cluster0046_Chondrocyte & osteoblast-related |
| 1436731_at   | Zfp385b       | zinc finger protein 385B                                                             | Cluster0046_Chondrocyte & osteoblast-related |
| 1432069_at   | 1700023G09Rik | RIKEN cDNA 1700023G09 gene                                                           | Cluster0047_Low in many                      |
| 1430946_at   | 2600014E21Rik | RIKEN cDNA 2600014E21 gene                                                           | Cluster0047_Low in many                      |
| 1454377_at   | 2700080J24Rik | RIKEN cDNA 2700080J24 gene                                                           | Cluster0047_Low in many                      |
| 1441025_at   | 3110047P20Rik | RIKEN cDNA 3110047P20 gene                                                           | Cluster0047_Low in many                      |
| 1432888_at   | 4930455M05Rik | RIKEN cDNA 4930455M05 gene                                                           | Cluster0047_Low in many                      |
| 1431870_at   | 4930463O16Rik | RIKEN cDNA 4930463O16 gene                                                           | Cluster0047_Low in many                      |
| 1433097_at   | 4930473M17Rik | RIKEN cDNA 4930473M17 gene                                                           | Cluster0047_Low in many                      |
| 1453952_at   | 4930572G02Rik | RIKEN cDNA 4930572G02 gene                                                           | Cluster0047_Low in many                      |
| 1429975_at   | 4931432M23Rik | RIKEN cDNA 4931432M23 gene                                                           | Cluster0047_Low in many                      |
| 1430903_at   | 4933416O17Rik | RIKEN cDNA 4933416O17 gene                                                           | Cluster0047_Low in many                      |
| 1454185_at   | 4933436E23Rik | RIKEN cDNA 4933436E23 gene                                                           | Cluster0047_Low in many                      |
| 1432949_at   | 5330421F21Rik | RIKEN cDNA 5330421F21 gene                                                           | Cluster0047_Low in many                      |
| 1430922_at   | 5530401A14Rik | RIKEN cDNA 5530401A14 gene                                                           | Cluster0047_Low in many                      |
| 1433321_at   | 9430087B13Rik | RIKEN cDNA 9430087B13 gene                                                           | Cluster0047_Low in many                      |
| 1430065_at   | A930005N03Rik | RIKEN cDNA A930005N03 gene                                                           | Cluster0047_Low in many                      |
| 1430937_at   | A930016O22Rik | RIKEN cDNA A930016O22 gene                                                           | Cluster0047_Low in many                      |

|              |                        |                                                                                                       |                               |
|--------------|------------------------|-------------------------------------------------------------------------------------------------------|-------------------------------|
| 1430945_at   | A930028C08Rik          | RIKEN cDNA A930028C08 gene                                                                            | Cluster0047_Low in many       |
| 1447138_at   | AI853502               | expressed sequence AI853502                                                                           | Cluster0047_Low in many       |
| 1444000_at   | B930059L03Rik          | RIKEN cDNA B930059L03 gene                                                                            | Cluster0047_Low in many       |
| 1427698_at   | Brca1                  | breast cancer 1                                                                                       | Cluster0047_Low in many       |
| 1458784_at   | C78148                 | expressed sequence C78148                                                                             | Cluster0047_Low in many       |
| 1448983_at   | Cdrt4                  | CMT1A duplicated region transcript 4                                                                  | Cluster0047_Low in many       |
| 1455275_at   | E530001K10Rik          | RIKEN cDNA E530001K10 gene                                                                            | Cluster0047_Low in many       |
| 1441357_at   | Kirrel3                | kin of IRRE like 3 (Drosophila)                                                                       | Cluster0047_Low in many       |
| 1441582_at   | LOC100038759           | hypothetical LOC100038759                                                                             | Cluster0047_Low in many       |
| 1446074_at   | LOC100045982 /// Mosc1 | similar to MOSC domain-containing protein 1, mitochondrial /// MOCO sulphurase C-terminal domain cont | Cluster0047_Low in many       |
| 1419677_at   | Masp1                  | mannan-binding lectin serine peptidase 1                                                              | Cluster0047_Low in many       |
| 1445442_at   | Mtap9                  | microtubule-associated protein 9                                                                      | Cluster0047_Low in many       |
| 1426145_at   | NA                     | ---                                                                                                   | Cluster0047_Low in many       |
| 1440420_at   | NA                     | ---                                                                                                   | Cluster0047_Low in many       |
| 1440449_at   | NA                     | ---                                                                                                   | Cluster0047_Low in many       |
| 1441488_at   | NA                     | ---                                                                                                   | Cluster0047_Low in many       |
| 1444173_at   | NA                     | ---                                                                                                   | Cluster0047_Low in many       |
| 1444955_at   | NA                     | ---                                                                                                   | Cluster0047_Low in many       |
| 1445415_at   | NA                     | ---                                                                                                   | Cluster0047_Low in many       |
| 1445587_at   | NA                     | ---                                                                                                   | Cluster0047_Low in many       |
| 1446039_at   | NA                     | ---                                                                                                   | Cluster0047_Low in many       |
| 1446709_at   | NA                     | ---                                                                                                   | Cluster0047_Low in many       |
| 1453781_at   | NA                     | ---                                                                                                   | Cluster0047_Low in many       |
| 1458095_at   | NA                     | ---                                                                                                   | Cluster0047_Low in many       |
| 1459199_at   | NA                     | ---                                                                                                   | Cluster0047_Low in many       |
| 1459337_at   | NA                     | ---                                                                                                   | Cluster0047_Low in many       |
| 1447608_x_at | Nacc2                  | nucleus accumbens associated 2, BEN and BTB (POZ) domain containing                                   | Cluster0047_Low in many       |
| 1430429_at   | Pgs1                   | phosphatidylglycerophosphate synthase 1                                                               | Cluster0047_Low in many       |
| 1449032_at   | Prl2a1                 | prolactin family 2, subfamily a, member 1                                                             | Cluster0047_Low in many       |
| 1438421_at   | Pvr1                   | poliovirus receptor-related 1                                                                         | Cluster0047_Low in many       |
| 1443215_at   | Rims2                  | regulating synaptic membrane exocytosis 2                                                             | Cluster0047_Low in many       |
| 1450197_at   | Rpe65                  | retinal pigment epithelium 65                                                                         | Cluster0047_Low in many       |
| 1422240_s_at | Sprr2h                 | small proline-rich protein 2H                                                                         | Cluster0047_Low in many       |
| 1438529_at   | Tmem201                | transmembrane protein 201                                                                             | Cluster0047_Low in many       |
| 1429869_at   | Wdr65                  | WD repeat domain 65                                                                                   | Cluster0047_Low in many       |
| 1454555_at   | Zfp572                 | zinc finger protein 572                                                                               | Cluster0047_Low in many       |
| 1436213_a_at | 1110028C15Rik          | RIKEN cDNA 1110028C15 gene                                                                            | Cluster0048_Thymocyte-related |
| 1436214_at   | 1110028C15Rik          | RIKEN cDNA 1110028C15 gene                                                                            | Cluster0048_Thymocyte-related |
| 1455602_x_at | 1110028C15Rik          | RIKEN cDNA 1110028C15 gene                                                                            | Cluster0048_Thymocyte-related |
| 1452840_at   | 1500009L16Rik          | RIKEN cDNA 1500009L16 gene                                                                            | Cluster0048_Thymocyte-related |
| 1430387_at   | 1810073O08Rik          | RIKEN cDNA 1810073O08 gene                                                                            | Cluster0048_Thymocyte-related |
| 1453323_at   | 2900079G21Rik          | RIKEN cDNA 2900079G21 gene                                                                            | Cluster0048_Thymocyte-related |
| 1447836_x_at | 4921525O09Rik          | RIKEN cDNA 4921525O09 gene                                                                            | Cluster0048_Thymocyte-related |
| 1454269_s_at | 4930519L02Rik          | RIKEN cDNA 4930519L02 gene                                                                            | Cluster0048_Thymocyte-related |
| 1438536_at   | 5830411N06Rik          | RIKEN cDNA 5830411N06 gene                                                                            | Cluster0048_Thymocyte-related |
| 1432288_at   | 5830468F06Rik          | RIKEN cDNA 5830468F06 gene                                                                            | Cluster0048_Thymocyte-related |
| 1459400_at   | A630038E17Rik          | RIKEN cDNA A630038E17 gene                                                                            | Cluster0048_Thymocyte-related |
| 1440233_at   | A930013B10Rik          | RIKEN cDNA A930013B10 gene                                                                            | Cluster0048_Thymocyte-related |
| 1456919_at   | A930013B10Rik          | RIKEN cDNA A930013B10 gene                                                                            | Cluster0048_Thymocyte-related |
| 1419028_at   | Arpp21                 | cyclic AMP-regulated phosphoprotein, 21                                                               | Cluster0048_Thymocyte-related |
| 1440429_at   | Arpp21                 | cyclic AMP-regulated phosphoprotein, 21                                                               | Cluster0048_Thymocyte-related |
| 1442121_at   | Arpp21                 | cyclic AMP-regulated phosphoprotein, 21                                                               | Cluster0048_Thymocyte-related |
| 1445536_at   | AW061096               | expressed sequence AW061096                                                                           | Cluster0048_Thymocyte-related |
| 1437232_at   | Bpil2                  | bactericidal/permeability-increasing protein-like 2                                                   | Cluster0048_Thymocyte-related |
| 1442754_at   | C030013G03Rik          | RIKEN cDNA C030013G03 gene                                                                            | Cluster0048_Thymocyte-related |
| 1427182_s_at | D18Ert653e             | DNA segment, Chr 18, ERATO Doi 653, expressed                                                         | Cluster0048_Thymocyte-related |
| 1452343_at   | D18Ert653e             | DNA segment, Chr 18, ERATO Doi 653, expressed                                                         | Cluster0048_Thymocyte-related |

|              |               |                                                                                   |                               |
|--------------|---------------|-----------------------------------------------------------------------------------|-------------------------------|
| 1442180_at   | Dleu7         | deleted in lymphocytic leukemia, 7                                                | Cluster0048_Thymocyte-related |
| 1442655_at   | Dnmt3b        | DNA methyltransferase 3B                                                          | Cluster0048_Thymocyte-related |
| 1420166_at   | Dntt          | Deoxynucleotidyltransferase, terminal                                             | Cluster0048_Thymocyte-related |
| 1449757_x_at | Dntt          | deoxynucleotidyltransferase, terminal                                             | Cluster0048_Thymocyte-related |
| 1450545_a_at | Dntt          | deoxynucleotidyltransferase, terminal                                             | Cluster0048_Thymocyte-related |
| 1449937_at   | Endou         | endonuclease, polyU-specific                                                      | Cluster0048_Thymocyte-related |
| 1449938_at   | Endou         | endonuclease, polyU-specific                                                      | Cluster0048_Thymocyte-related |
| 1441350_at   | Fgf3          | fibroblast growth factor 3                                                        | Cluster0048_Thymocyte-related |
| 1441914_x_at | Fgf3          | Fibroblast growth factor 3                                                        | Cluster0048_Thymocyte-related |
| 1441805_at   | Gm2629        | Predicted gene 2629                                                               | Cluster0048_Thymocyte-related |
| 1447559_at   | Gpr25         | G protein-coupled receptor 25                                                     | Cluster0048_Thymocyte-related |
| 1446696_at   | lft57         | intraflagellar transport 57 homolog (Chlamydomonas)                               | Cluster0048_Thymocyte-related |
| 1455423_at   | Khdc1a        | KH domain containing 1A                                                           | Cluster0048_Thymocyte-related |
| 1421402_at   | Mta3          | metastasis associated 3                                                           | Cluster0048_Thymocyte-related |
| 1420805_at   | Myl10         | myosin, light chain 10, regulatory                                                | Cluster0048_Thymocyte-related |
| 1436154_at   | NA            | ---                                                                               | Cluster0048_Thymocyte-related |
| 1439412_at   | NA            | ---                                                                               | Cluster0048_Thymocyte-related |
| 1441605_at   | NA            | ---                                                                               | Cluster0048_Thymocyte-related |
| 1443908_at   | NA            | ---                                                                               | Cluster0048_Thymocyte-related |
| 1445895_at   | NA            | ---                                                                               | Cluster0048_Thymocyte-related |
| 1452558_at   | NA            | ---                                                                               | Cluster0048_Thymocyte-related |
| 1457101_at   | NA            | ---                                                                               | Cluster0048_Thymocyte-related |
| 1439897_at   | Nebi          | nebulin                                                                           | Cluster0048_Thymocyte-related |
| 1455343_at   | Plekha7       | pleckstrin homology domain containing, family A member 7                          | Cluster0048_Thymocyte-related |
| 1422256_at   | Sstr2         | somatostatin receptor 2                                                           | Cluster0048_Thymocyte-related |
| 1427628_at   | Tcrb-V8.2     | T-cell receptor beta, variable 8.2                                                | Cluster0048_Thymocyte-related |
| 1451181_at   | Tmem121       | transmembrane protein 121                                                         | Cluster0048_Thymocyte-related |
| 1431029_at   | Ttll9         | tubulin tyrosine ligase-like family, member 9                                     | Cluster0048_Thymocyte-related |
| 1420767_at   | 1700019G17Rik | RIKEN cDNA 1700019G17 gene                                                        | Cluster0049_Intestine-related |
| 1431130_at   | 2010110P09Rik | RIKEN cDNA 2010110P09 gene                                                        | Cluster0049_Intestine-related |
| 1451562_at   | A2ld1         | AIG2-like domain 1                                                                | Cluster0049_Intestine-related |
| 1455061_a_at | Acaa2         | acetyl-Coenzyme A acyltransferase 2 (mitochondrial 3-oxoacyl-Coenzyme A thiolase) | Cluster0049_Intestine-related |
| 1451911_a_at | Ace           | angiotensin I converting enzyme (peptidyl-dipeptidase A) 1                        | Cluster0049_Intestine-related |
| 1438451_at   | Arhgap32      | Rho GTPase activating protein 32                                                  | Cluster0049_Intestine-related |
| 1426699_at   | AU040320      | expressed sequence AU040320                                                       | Cluster0049_Intestine-related |
| 1418764_a_at | Bpnt1         | bisphosphate 3-nucleotidase 1                                                     | Cluster0049_Intestine-related |
| 1442031_at   | Ccdc109a      | coiled-coil domain containing 109A                                                | Cluster0049_Intestine-related |
| 1422074_at   | Cdx2          | caudal type homeobox 2                                                            | Cluster0049_Intestine-related |
| 1449887_at   | Chmp4c        | chromatin modifying protein 4C                                                    | Cluster0049_Intestine-related |
| 1431261_at   | Clic5         | chloride intracellular channel 5                                                  | Cluster0049_Intestine-related |
| 1458381_at   | Clic5         | chloride intracellular channel 5                                                  | Cluster0049_Intestine-related |
| 1419382_a_at | Dhrs4         | dehydrogenase/reductase (SDR family) member 4                                     | Cluster0049_Intestine-related |
| 1430278_a_at | Dqx1          | DEAQ RNA-dependent ATPase                                                         | Cluster0049_Intestine-related |
| 1450314_at   | Dqx1          | DEAQ RNA-dependent ATPase                                                         | Cluster0049_Intestine-related |
| 1421136_at   | Edn3          | endothelin 3                                                                      | Cluster0049_Intestine-related |
| 1417383_at   | Entpd5        | ectonucleoside triphosphate diphosphohydrolase 5                                  | Cluster0049_Intestine-related |
| 1452482_at   | Erbb3         | v-erb-b2 erythroblastic leukemia viral oncogene homolog 3 (avian)                 | Cluster0049_Intestine-related |
| 1425799_at   | Fmo4          | flavin containing monooxygenase 4                                                 | Cluster0049_Intestine-related |
| 1450125_at   | Gata5         | GATA binding protein 5                                                            | Cluster0049_Intestine-related |
| 1460233_at   | Guca2b        | guanylate cyclase activator 2b (retina)                                           | Cluster0049_Intestine-related |
| 1450447_at   | Hnf4a         | hepatic nuclear factor 4, alpha                                                   | Cluster0049_Intestine-related |
| 1422182_at   | Hnf4g         | hepatocyte nuclear factor 4, gamma                                                | Cluster0049_Intestine-related |
| 1450518_at   | Hnf4g         | hepatocyte nuclear factor 4, gamma                                                | Cluster0049_Intestine-related |
| 1421011_at   | Hsd17b11      | hydroxysteroid (17-beta) dehydrogenase 11                                         | Cluster0049_Intestine-related |
| 1450860_at   | Lap3          | leucine aminopeptidase 3                                                          | Cluster0049_Intestine-related |
| 1447252_s_at | Mep1a         | mepriin 1 alpha                                                                   | Cluster0049_Intestine-related |
| 1422145_at   | Mgat3         | mannoside acetylglucosaminyltransferase 3                                         | Cluster0049_Intestine-related |

|              |                                       |                                                                                                                   |                                         |
|--------------|---------------------------------------|-------------------------------------------------------------------------------------------------------------------|-----------------------------------------|
| 1422975_at   | Mme                                   | membrane metallo endopeptidase                                                                                    | Cluster0049_Intestine-related           |
| 1421835_at   | Mtap7                                 | microtubule-associated protein 7                                                                                  | Cluster0049_Intestine-related           |
| 1429894_a_at | Mtap7                                 | microtubule-associated protein 7                                                                                  | Cluster0049_Intestine-related           |
| 1447211_at   | Nrip1                                 | nuclear receptor interacting protein 1                                                                            | Cluster0049_Intestine-related           |
| 1439617_s_at | Pck1                                  | phosphoenolpyruvate carboxykinase 1, cytosolic                                                                    | Cluster0049_Intestine-related           |
| 1425739_at   | Pld1                                  | phospholipase D1                                                                                                  | Cluster0049_Intestine-related           |
| 1425853_s_at | Prlr                                  | prolactin receptor                                                                                                | Cluster0049_Intestine-related           |
| 1431301_at   | Prr15                                 | proline rich 15                                                                                                   | Cluster0049_Intestine-related           |
| 1450516_a_at | Rab17                                 | RAB17, member RAS oncogene family                                                                                 | Cluster0049_Intestine-related           |
| 1422846_at   | Rbp2                                  | retinol binding protein 2, cellular                                                                               | Cluster0049_Intestine-related           |
| 1449495_at   | Reg3a                                 | regenerating islet-derived 3 alpha                                                                                | Cluster0049_Intestine-related           |
| 1449228_at   | Sh3gl2                                | SH3-domain GRB2-like 2                                                                                            | Cluster0049_Intestine-related           |
| 1427531_a_at | Slc22a18                              | solute carrier family 22 (organic cation transporter), member 18                                                  | Cluster0049_Intestine-related           |
| 1420966_at   | Slc25a15                              | solute carrier family 25 (mitochondrial carrier ornithine transporter), member 15                                 | Cluster0049_Intestine-related           |
| 1447181_s_at | Slc7a7                                | solute carrier family 7 (cationic amino acid transporter, y+ system), member 7                                    | Cluster0049_Intestine-related           |
| 1452042_a_at | Tmem144                               | transmembrane protein 144                                                                                         | Cluster0049_Intestine-related           |
| 1451836_at   | Tmem150b                              | transmembrane protein 150B                                                                                        | Cluster0049_Intestine-related           |
| 1423004_at   | Vipr1                                 | vasoactive intestinal peptide receptor 1                                                                          | Cluster0049_Intestine-related           |
| 1418470_at   | Yes1                                  | Yamaguchi sarcoma viral (v-yes) oncogene homolog 1                                                                | Cluster0049_Intestine-related           |
| 1428258_at   | 2010107E04Rik                         | RIKEN cDNA 2010107E04 gene                                                                                        | Cluster0050_House keeping-mitochondrion |
| 1455006_at   | 2310016M24Rik                         | RIKEN cDNA 2310016M24 gene                                                                                        | Cluster0050_House keeping-mitochondrion |
| 1427909_at   | 2410015M20Rik                         | RIKEN cDNA 2410015M20 gene                                                                                        | Cluster0050_House keeping-mitochondrion |
| 1416567_s_at | Atp5e                                 | ATP synthase, H+ transporting, mitochondrial F1 complex, epsilon subunit                                          | Cluster0050_House keeping-mitochondrion |
| 1426742_at   | Atp5f1                                | ATP synthase, H+ transporting, mitochondrial F0 complex, subunit B1                                               | Cluster0050_House keeping-mitochondrion |
| 1416020_a_at | Atp5g1                                | ATP synthase, H+ transporting, mitochondrial F0 complex, subunit c1 (subunit 9)                                   | Cluster0050_House keeping-mitochondrion |
| 1423676_at   | Atp5h                                 | ATP synthase, H+ transporting, mitochondrial F0 complex, subunit d                                                | Cluster0050_House keeping-mitochondrion |
| 1416269_at   | Atp5j2                                | ATP synthase, H+ transporting, mitochondrial F0 complex, subunit F2                                               | Cluster0050_House keeping-mitochondrion |
| 1448203_at   | Atp5l /// Atp5l2 /// Gm10221          | ATP synthase, H+ transporting, mitochondrial F0 complex, subunit g /// ATP synthase, H+ transporting, mit         | Cluster0050_House keeping-mitochondrion |
| 1456616_a_at | Bsg                                   | basigin                                                                                                           | Cluster0050_House keeping-mitochondrion |
| 1450815_s_at | Chchd2 /// LOC100045688 /// Scand3    | coiled-coil-helix-coiled-coil-helix domain containing 2 /// similar to coiled-coil-helix-coiled-coil-helix domain | Cluster0050_House keeping-mitochondrion |
| 1451504_at   | Chchd3                                | coiled-coil-helix-coiled-coil-helix domain containing 3                                                           | Cluster0050_House keeping-mitochondrion |
| 1416849_at   | Cisd1                                 | CDGSH iron sulfur domain 1                                                                                        | Cluster0050_House keeping-mitochondrion |
| 1448153_at   | Cox5a                                 | cytochrome c oxidase, subunit Va                                                                                  | Cluster0050_House keeping-mitochondrion |
| 1416902_a_at | Cox5b                                 | cytochrome c oxidase, subunit Vb                                                                                  | Cluster0050_House keeping-mitochondrion |
| 1417418_s_at | Cox6a1 /// Gm7795                     | cytochrome c oxidase, subunit VI a, polypeptide 1 /// predicted gene 7795                                         | Cluster0050_House keeping-mitochondrion |
| 1416565_at   | Cox6b1                                | cytochrome c oxidase, subunit VIb polypeptide 1                                                                   | Cluster0050_House keeping-mitochondrion |
| 1415970_at   | Cox6c                                 | cytochrome c oxidase, subunit VIc                                                                                 | Cluster0050_House keeping-mitochondrion |
| 1416971_at   | Cox7a2                                | cytochrome c oxidase, subunit VIIa 2                                                                              | Cluster0050_House keeping-mitochondrion |
| 1448112_at   | Cox7c /// LOC100047065 /// LOC1000486 | cytochrome c oxidase, subunit VIIc /// similar to cytochrome c oxidase, subunit VIIc /// similar to cytochr       | Cluster0050_House keeping-mitochondrion |
| 1416112_at   | Cox8a                                 | cytochrome c oxidase, subunit VIIla                                                                               | Cluster0050_House keeping-mitochondrion |
| 1448222_x_at | Cox8a                                 | cytochrome c oxidase, subunit VIIla                                                                               | Cluster0050_House keeping-mitochondrion |
| 1452341_at   | Echs1                                 | enoyl Coenzyme A hydratase, short chain, 1, mitochondrial                                                         | Cluster0050_House keeping-mitochondrion |
| 1428075_at   | Gm3244 /// Ndufb4                     | predicted pseudogene 3244 /// NADH dehydrogenase (ubiquinone) 1 beta subcomplex 4                                 | Cluster0050_House keeping-mitochondrion |
| 1428076_s_at | Gm3244 /// Ndufb4                     | predicted pseudogene 3244 /// NADH dehydrogenase (ubiquinone) 1 beta subcomplex 4                                 | Cluster0050_House keeping-mitochondrion |
| 1450067_a_at | Mdp1                                  | magnesium-dependent phosphatase 1                                                                                 | Cluster0050_House keeping-mitochondrion |
| 1429708_at   | Ndufa11                               | NADH dehydrogenase (ubiquinone) 1 alpha subcomplex 11                                                             | Cluster0050_House keeping-mitochondrion |
| 1448427_at   | Ndufa6                                | NADH dehydrogenase (ubiquinone) 1 alpha subcomplex, 6 (B14)                                                       | Cluster0050_House keeping-mitochondrion |
| 1455749_x_at | Ndufa7                                | NADH dehydrogenase (ubiquinone) 1 alpha subcomplex, 7 (B14.5a)                                                    | Cluster0050_House keeping-mitochondrion |
| 1423692_at   | Ndufa8                                | NADH dehydrogenase (ubiquinone) 1 alpha subcomplex, 8                                                             | Cluster0050_House keeping-mitochondrion |
| 1428159_s_at | Ndufab1                               | NADH dehydrogenase (ubiquinone) 1, alpha/beta subcomplex, 1                                                       | Cluster0050_House keeping-mitochondrion |
| 1416057_at   | Ndufb11                               | NADH dehydrogenase (ubiquinone) 1 beta subcomplex, 11                                                             | Cluster0050_House keeping-mitochondrion |
| 1448589_at   | Ndufb5                                | NADH dehydrogenase (ubiquinone) 1 beta subcomplex, 5                                                              | Cluster0050_House keeping-mitochondrion |
| 1448331_at   | Ndufb7                                | NADH dehydrogenase (ubiquinone) 1 beta subcomplex, 7                                                              | Cluster0050_House keeping-mitochondrion |
| 1452184_at   | Ndufb9                                | NADH dehydrogenase (ubiquinone) 1 beta subcomplex, 9                                                              | Cluster0050_House keeping-mitochondrion |
| 1416285_at   | Ndufc1                                | NADH dehydrogenase (ubiquinone) 1, subcomplex unknown, 1                                                          | Cluster0050_House keeping-mitochondrion |
| 1451312_at   | Ndufs7                                | NADH dehydrogenase (ubiquinone) Fe-S protein 7                                                                    | Cluster0050_House keeping-mitochondrion |
| 1428179_at   | Ndufv2                                | NADH dehydrogenase (ubiquinone) flavoprotein 2                                                                    | Cluster0050_House keeping-mitochondrion |

|              |               |                                                                                                 |                                          |
|--------------|---------------|-------------------------------------------------------------------------------------------------|------------------------------------------|
| 1432332_a_at | Nudt19        | nudix (nucleoside diphosphate linked moiety X)-type motif 19                                    | Cluster0050_House keeping-mitochondrion  |
| 1421215_a_at | Slmap         | sarcolemma associated protein                                                                   | Cluster0050_House keeping-mitochondrion  |
| 1427441_a_at | Succlg2       | succinate-Coenzyme A ligase, GDP-forming, beta subunit                                          | Cluster0050_House keeping-mitochondrion  |
| 1423951_at   | Tm2d3         | TM2 domain containing 3                                                                         | Cluster0050_House keeping-mitochondrion  |
| 1424364_a_at | Uqcr10        | ubiquinol-cytochrome c reductase, complex III subunit X                                         | Cluster0050_House keeping-mitochondrion  |
| 1452133_at   | Uqcrh         | ubiquinol-cytochrome c reductase hinge protein                                                  | Cluster0050_House keeping-mitochondrion  |
| 1453229_s_at | Uqcrh         | ubiquinol-cytochrome c reductase hinge protein                                                  | Cluster0050_House keeping-mitochondrion  |
| 1415998_at   | Vdac1         | voltage-dependent anion channel 1                                                               | Cluster0050_House keeping-mitochondrion  |
| 1437291_at   | 2700081O15Rik | RIKEN cDNA 2700081O15 gene                                                                      | Cluster0051_Extracellular matrix-related |
| 1452387_a_at | Amotl2        | angiomin-like 2                                                                                 | Cluster0051_Extracellular matrix-related |
| 1424770_at   | Cald1         | caldesmon 1                                                                                     | Cluster0051_Extracellular matrix-related |
| 1415870_at   | Calu          | calumenin                                                                                       | Cluster0051_Extracellular matrix-related |
| 1438715_at   | Ccdc102a      | coiled-coil domain containing 102A                                                              | Cluster0051_Extracellular matrix-related |
| 1436380_at   | Cdc42bpa      | CDC42 binding protein kinase alpha                                                              | Cluster0051_Extracellular matrix-related |
| 1426754_x_at | Ckap4         | cytoskeleton-associated protein 4                                                               | Cluster0051_Extracellular matrix-related |
| 1452181_at   | Ckap4         | cytoskeleton-associated protein 4                                                               | Cluster0051_Extracellular matrix-related |
| 1425155_x_at | Csf1          | colony stimulating factor 1 (macrophage)                                                        | Cluster0051_Extracellular matrix-related |
| 1460220_a_at | Csf1          | colony stimulating factor 1 (macrophage)                                                        | Cluster0051_Extracellular matrix-related |
| 1426855_at   | D10Ert610e    | DNA segment, Chr 10, ERATO Doi 610, expressed                                                   | Cluster0051_Extracellular matrix-related |
| 1417018_at   | Efemp2        | epidermal growth factor-containing fibulin-like extracellular matrix protein 2                  | Cluster0051_Extracellular matrix-related |
| 1423407_a_at | Fbln2         | fibulin 2                                                                                       | Cluster0051_Extracellular matrix-related |
| 1434181_at   | Fermt2        | fermitin family homolog 2 (Drosophila)                                                          | Cluster0051_Extracellular matrix-related |
| 1437218_at   | Fn1           | fibronectin 1                                                                                   | Cluster0051_Extracellular matrix-related |
| 1419066_at   | Ier5l         | immediate early response 5-like                                                                 | Cluster0051_Extracellular matrix-related |
| 1434797_at   | Kirrel        | kin of IRRE like (Drosophila)                                                                   | Cluster0051_Extracellular matrix-related |
| 1444165_at   | Layn          | layilin                                                                                         | Cluster0051_Extracellular matrix-related |
| 1433812_at   | Lix1l         | Lix1-like                                                                                       | Cluster0051_Extracellular matrix-related |
| 1436063_at   | Lox1l         | lysyl oxidase-like 1                                                                            | Cluster0051_Extracellular matrix-related |
| 1417234_at   | Mmp11         | matrix metalloproteinase 11                                                                     | Cluster0051_Extracellular matrix-related |
| 1422550_a_at | Mtap6         | microtubule-associated protein 6                                                                | Cluster0051_Extracellular matrix-related |
| 1416491_at   | Numb1         | numb-like                                                                                       | Cluster0051_Extracellular matrix-related |
| 1424086_at   | Oaf           | OAF homolog (Drosophila)                                                                        | Cluster0051_Extracellular matrix-related |
| 1460414_at   | Obsl1         | obscurin-like 1                                                                                 | Cluster0051_Extracellular matrix-related |
| 1417149_at   | P4ha2         | procollagen-proline, 2-oxoglutarate 4-dioxygenase (proline 4-hydroxylase), alpha II polypeptide | Cluster0051_Extracellular matrix-related |
| 1416818_at   | Parva         | parvin, alpha                                                                                   | Cluster0051_Extracellular matrix-related |
| 1449002_at   | Phlda3        | pleckstrin homology-like domain, family A, member 3                                             | Cluster0051_Extracellular matrix-related |
| 1416781_at   | Praf2         | PRA1 domain family 2                                                                            | Cluster0051_Extracellular matrix-related |
| 1427688_a_at | Ptprs         | protein tyrosine phosphatase, receptor type, S                                                  | Cluster0051_Extracellular matrix-related |
| 1422399_a_at | Rab23         | RAB23, member RAS oncogene family                                                               | Cluster0051_Extracellular matrix-related |
| 1452113_a_at | Rab23         | RAB23, member RAS oncogene family                                                               | Cluster0051_Extracellular matrix-related |
| 1416590_a_at | Rab34         | RAB34, member of RAS oncogene family                                                            | Cluster0051_Extracellular matrix-related |
| 1416591_at   | Rab34         | RAB34, member of RAS oncogene family                                                            | Cluster0051_Extracellular matrix-related |
| 1418246_at   | Rbm9          | RNA binding motif protein 9                                                                     | Cluster0051_Extracellular matrix-related |
| 1418247_s_at | Rbm9          | RNA binding motif protein 9                                                                     | Cluster0051_Extracellular matrix-related |
| 1423540_at   | Rbms2         | RNA binding motif, single stranded interacting protein 2                                        | Cluster0051_Extracellular matrix-related |
| 1423349_at   | Socs5         | suppressor of cytokine signaling 5                                                              | Cluster0051_Extracellular matrix-related |
| 1429556_at   | Tead1         | TEA domain family member 1                                                                      | Cluster0051_Extracellular matrix-related |
| 1460227_at   | Timp1         | tissue inhibitor of metalloproteinase 1                                                         | Cluster0051_Extracellular matrix-related |
| 1429111_at   | Tln2          | taln 2                                                                                          | Cluster0051_Extracellular matrix-related |
| 1451327_a_at | Tmed1         | transmembrane emp24 domain containing 1                                                         | Cluster0051_Extracellular matrix-related |
| 1431150_at   | 1700110M21Rik | RIKEN cDNA 1700110M21 gene                                                                      | Cluster0052_Uncertain                    |
| 1433214_x_at | 2700008E08Rik | RIKEN cDNA 2700008E08 gene                                                                      | Cluster0052_Uncertain                    |
| 1430398_at   | 4921517O11Rik | RIKEN cDNA 4921517O11 gene                                                                      | Cluster0052_Uncertain                    |
| 1433344_at   | 4930448K20Rik | glyceraldehyde-3-phosphate dehydrogenase pseudogene                                             | Cluster0052_Uncertain                    |
| 1432373_at   | 4930533B01Rik | RIKEN cDNA 4930533B01 gene                                                                      | Cluster0052_Uncertain                    |
| 1431927_at   | 5033417F24Rik | RIKEN cDNA 5033417F24 gene                                                                      | Cluster0052_Uncertain                    |
| 1433230_at   | 5730415C11Rik | RIKEN cDNA 5730415C11 gene                                                                      | Cluster0052_Uncertain                    |

|              |                         |                                                                                                 |                       |
|--------------|-------------------------|-------------------------------------------------------------------------------------------------|-----------------------|
| 1433358_at   | A230102O21Rik           | RIKEN cDNA A230102O21 gene                                                                      | Cluster0052_Uncertain |
| 1444381_at   | A830005F24Rik           | RIKEN cDNA A830005F24 gene                                                                      | Cluster0052_Uncertain |
| 1436112_at   | AI118078                | expressed sequence AI118078                                                                     | Cluster0052_Uncertain |
| 1433187_at   | B230112I24Rik           | RIKEN cDNA B230112I24 gene                                                                      | Cluster0052_Uncertain |
| 1459468_at   | C79743                  | expressed sequence C79743                                                                       | Cluster0052_Uncertain |
| 1427591_at   | Clcn1                   | chloride channel 1                                                                              | Cluster0052_Uncertain |
| 1458890_at   | D030055H07Rik           | RIKEN cDNA D030055H07 gene                                                                      | Cluster0052_Uncertain |
| 1445063_at   | D1ErtD228e              | DNA segment, Chr 1, ERATO Doi 228, expressed                                                    | Cluster0052_Uncertain |
| 1420219_at   | Dnajc21                 | DnaJ (Hsp40) homolog, subfamily C, member 21                                                    | Cluster0052_Uncertain |
| 1449777_at   | Dus4l                   | Dihydrouridine synthase 4-like ( <i>S. cerevisiae</i> )                                         | Cluster0052_Uncertain |
| 1422212_at   | Foxh1                   | forkhead box H1                                                                                 | Cluster0052_Uncertain |
| 1420266_at   | Gm10627                 | predicted gene 10627                                                                            | Cluster0052_Uncertain |
| 1446470_at   | Gm9799                  | predicted gene 9799                                                                             | Cluster0052_Uncertain |
| 1421468_at   | Kcnj3                   | potassium inwardly-rectifying channel, subfamily J, member 3                                    | Cluster0052_Uncertain |
| 1458352_at   | Lcorl                   | Ligand dependent nuclear receptor corepressor-like                                              | Cluster0052_Uncertain |
| 1450831_at   | LOC100046032 /// Pou3f2 | similar to brain-2 class III POU-domain protein /// POU domain, class 3, transcription factor 2 | Cluster0052_Uncertain |
| 1453673_at   | LOC100046982            | hypothetical protein LOC100046982                                                               | Cluster0052_Uncertain |
| 1458136_at   | Msi2                    | Musashi homolog 2 ( <i>Drosophila</i> )                                                         | Cluster0052_Uncertain |
| 1437612_at   | NA                      | ---                                                                                             | Cluster0052_Uncertain |
| 1442694_at   | NA                      | ---                                                                                             | Cluster0052_Uncertain |
| 1442910_at   | NA                      | ---                                                                                             | Cluster0052_Uncertain |
| 1443006_at   | NA                      | ---                                                                                             | Cluster0052_Uncertain |
| 1444522_at   | NA                      | ---                                                                                             | Cluster0052_Uncertain |
| 1445372_at   | NA                      | ---                                                                                             | Cluster0052_Uncertain |
| 1459007_at   | NA                      | ---                                                                                             | Cluster0052_Uncertain |
| 1460160_at   | NA                      | ---                                                                                             | Cluster0052_Uncertain |
| 1441587_at   | Plch2                   | phospholipase C, eta 2                                                                          | Cluster0052_Uncertain |
| 1459768_x_at | Rap1gds1                | RAP1, GTP-GDP dissociation stimulator 1                                                         | Cluster0052_Uncertain |
| 1447563_at   | Rps3                    | ribosomal protein S3                                                                            | Cluster0052_Uncertain |
| 1450353_at   | Slc25a17                | solute carrier family 25 (mitochondrial carrier, peroxisomal membrane protein), member 17       | Cluster0052_Uncertain |
| 1429923_x_at | Spata3                  | spermatogenesis associated 3                                                                    | Cluster0052_Uncertain |
| 1453335_a_at | Spata3                  | spermatogenesis associated 3                                                                    | Cluster0052_Uncertain |
| 1442751_at   | Trio                    | triple functional domain (PTPRF interacting)                                                    | Cluster0052_Uncertain |
| 1451694_at   | Ttl3                    | tubulin tyrosine ligase-like family, member 3                                                   | Cluster0052_Uncertain |
| 1431578_at   | Wbp2nl                  | WBP2 N-terminal like                                                                            | Cluster0052_Uncertain |
| 1454251_at   | 1700034J04Rik           | RIKEN cDNA 1700034J04 gene                                                                      | Cluster0053_Uncertain |
| 1457982_at   | 1700052M18Rik           | RIKEN cDNA 1700052M18 gene                                                                      | Cluster0053_Uncertain |
| 1440160_x_at | 2010321M09Rik           | RIKEN cDNA 2010321M09 gene                                                                      | Cluster0053_Uncertain |
| 1432687_at   | 4833406M21Rik           | RIKEN cDNA 4833406M21 gene                                                                      | Cluster0053_Uncertain |
| 1454164_at   | 4921523L03Rik           | RIKEN cDNA 4921523L03 gene                                                                      | Cluster0053_Uncertain |
| 1432048_at   | 6330565B04Rik           | RIKEN cDNA 6330565B04 gene                                                                      | Cluster0053_Uncertain |
| 1460388_at   | Acot6                   | acyl-CoA thioesterase 6                                                                         | Cluster0053_Uncertain |
| 1436129_at   | Adam6b                  | a disintegrin and metallopeptidase domain 6B                                                    | Cluster0053_Uncertain |
| 1458753_at   | Arhgef33                | Rho guanine nucleotide exchange factor (GEF) 33                                                 | Cluster0053_Uncertain |
| 1451699_at   | B230354O11Rik           | RIKEN cDNA B230354O11 gene                                                                      | Cluster0053_Uncertain |
| 1457661_at   | B930036G03Rik           | RIKEN cDNA B930036G03 gene                                                                      | Cluster0053_Uncertain |
| 1447759_x_at | Ccdc22                  | coiled-coil domain containing 22                                                                | Cluster0053_Uncertain |
| 1433353_at   | D530015H24Rik           | RIKEN cDNA D530015H24 gene                                                                      | Cluster0053_Uncertain |
| 1421788_x_at | Egfbp2                  | epidermal growth factor binding protein type B                                                  | Cluster0053_Uncertain |
| 1445482_at   | Gle1                    | GLE1 RNA export mediator (yeast)                                                                | Cluster0053_Uncertain |
| 1440733_at   | Gm16499                 | predicted gene 16499                                                                            | Cluster0053_Uncertain |
| 1447412_at   | Gm996                   | predicted gene 996                                                                              | Cluster0053_Uncertain |
| 1450346_at   | Gpr50                   | G-protein-coupled receptor 50                                                                   | Cluster0053_Uncertain |
| 1436749_at   | Mesdc2                  | mesoderm development candidate 2                                                                | Cluster0053_Uncertain |
| 1457425_at   | Mtus2                   | Microtubule associated tumor suppressor candidate 2                                             | Cluster0053_Uncertain |
| 1420228_at   | NA                      | ---                                                                                             | Cluster0053_Uncertain |
| 1440597_at   | NA                      | ---                                                                                             | Cluster0053_Uncertain |

|              |                       |                                                                                                        |                                   |
|--------------|-----------------------|--------------------------------------------------------------------------------------------------------|-----------------------------------|
| 1444022_at   | NA                    | ---                                                                                                    | Cluster0053_Uncertain             |
| 1446334_at   | NA                    | ---                                                                                                    | Cluster0053_Uncertain             |
| 1446869_at   | NA                    | ---                                                                                                    | Cluster0053_Uncertain             |
| 1446961_at   | NA                    | ---                                                                                                    | Cluster0053_Uncertain             |
| 1447532_at   | NA                    | ---                                                                                                    | Cluster0053_Uncertain             |
| 1449781_at   | NA                    | ---                                                                                                    | Cluster0053_Uncertain             |
| 1457595_at   | NA                    | ---                                                                                                    | Cluster0053_Uncertain             |
| 1458085_at   | NA                    | ---                                                                                                    | Cluster0053_Uncertain             |
| 1459654_at   | NA                    | ---                                                                                                    | Cluster0053_Uncertain             |
| 1443277_at   | Ndst3                 | N-deacetylase/N-sulfotransferase (heparan glucosaminy) 3                                               | Cluster0053_Uncertain             |
| 1422386_at   | Olfir64               | olfactory receptor 64                                                                                  | Cluster0053_Uncertain             |
| 1421503_at   | Pcdh15                | protocadherin 15                                                                                       | Cluster0053_Uncertain             |
| 1439002_s_at | Pr13d1 /// Pr13d2     | prolactin family 3, subfamily d, member 1 /// prolactin family 3, subfamily d, member 1                | Cluster0053_Uncertain             |
| 1427727_x_at | Psg19                 | pregnancy specific glycoprotein 19                                                                     | Cluster0053_Uncertain             |
| 1447672_x_at | Pskh1                 | protein serine kinase H1                                                                               | Cluster0053_Uncertain             |
| 1455707_at   | Ranbp3l               | RAN binding protein 3-like                                                                             | Cluster0053_Uncertain             |
| 1421668_x_at | Speer3                | spermatogenesis associated glutamate (E)-rich protein 3                                                | Cluster0053_Uncertain             |
| 1443740_at   | St3gal6               | ST3 beta-galactoside alpha-2,3-sialyltransferase 6                                                     | Cluster0053_Uncertain             |
| 1446416_at   | Sulf1                 | sulfatase 1                                                                                            | Cluster0053_Uncertain             |
| 1435310_at   | Syn3                  | synapsin III                                                                                           | Cluster0053_Uncertain             |
| 1424629_at   | Brca1                 | breast cancer 1                                                                                        | Cluster0054_House keeping-nucleus |
| 1447363_s_at | Bub1b                 | budding uninhibited by benzimidazoles 1 homolog, beta ( <i>S. cerevisiae</i> )                         | Cluster0054_House keeping-nucleus |
| 1434767_at   | C79407                | expressed sequence C79407                                                                              | Cluster0054_House keeping-nucleus |
| 1455983_at   | Cdca2                 | cell division cycle associated 2                                                                       | Cluster0054_House keeping-nucleus |
| 1448466_at   | Cdca5                 | cell division cycle associated 5                                                                       | Cluster0054_House keeping-nucleus |
| 1428481_s_at | Cdca8                 | cell division cycle associated 8                                                                       | Cluster0054_House keeping-nucleus |
| 1450677_at   | Chek1                 | checkpoint kinase 1 homolog ( <i>S. pombe</i> )                                                        | Cluster0054_House keeping-nucleus |
| 1434695_at   | Dtl                   | denticleless homolog ( <i>Drosophila</i> )                                                             | Cluster0054_House keeping-nucleus |
| 1452681_at   | Dtymk                 | deoxythymidylate kinase                                                                                | Cluster0054_House keeping-nucleus |
| 1419270_a_at | Dut                   | deoxyuridine triphosphatase                                                                            | Cluster0054_House keeping-nucleus |
| 1427147_at   | F730047E07Rik         | RIKEN cDNA F730047E07 gene                                                                             | Cluster0054_House keeping-nucleus |
| 1439562_at   | F730047E07Rik         | RIKEN cDNA F730047E07 gene                                                                             | Cluster0054_House keeping-nucleus |
| 1427953_at   | Fanci                 | Fanconi anemia, complementation group I                                                                | Cluster0054_House keeping-nucleus |
| 1422430_at   | Fignl1                | fidgetin-like 1                                                                                        | Cluster0054_House keeping-nucleus |
| 1452598_at   | Gins1                 | GIN5 complex subunit 1 (Psf1 homolog)                                                                  | Cluster0054_House keeping-nucleus |
| 1417506_at   | Gmnn                  | geminin                                                                                                | Cluster0054_House keeping-nucleus |
| 1451103_at   | Haus4                 | HAUS augmin-like complex, subunit 4                                                                    | Cluster0054_House keeping-nucleus |
| 1437716_x_at | Kif22                 | kinesin family member 22                                                                               | Cluster0054_House keeping-nucleus |
| 1416641_at   | Lig1                  | ligase I, DNA, ATP-dependent                                                                           | Cluster0054_House keeping-nucleus |
| 1420028_s_at | LOC100045677 /// Mcm3 | similar to DNA replication licensing factor MCM3 (DNA polymerase alpha holoenzyme-associated protein P | Cluster0054_House keeping-nucleus |
| 1426652_at   | LOC100045677 /// Mcm3 | similar to DNA replication licensing factor MCM3 (DNA polymerase alpha holoenzyme-associated protein P | Cluster0054_House keeping-nucleus |
| 1449705_x_at | LOC100045677 /// Mcm3 | similar to DNA replication licensing factor MCM3 (DNA polymerase alpha holoenzyme-associated protein P | Cluster0054_House keeping-nucleus |
| 1448777_at   | Mcm2                  | minichromosome maintenance deficient 2 mitotin ( <i>S. cerevisiae</i> )                                | Cluster0054_House keeping-nucleus |
| 1416251_at   | Mcm6                  | minichromosome maintenance deficient 6 (MISS homolog, <i>S. pombe</i> ) ( <i>S. cerevisiae</i> )       | Cluster0054_House keeping-nucleus |
| 1416031_s_at | Mcm7                  | minichromosome maintenance deficient 7 ( <i>S. cerevisiae</i> )                                        | Cluster0054_House keeping-nucleus |
| 1438320_s_at | Mcm7                  | minichromosome maintenance deficient 7 ( <i>S. cerevisiae</i> )                                        | Cluster0054_House keeping-nucleus |
| 1428518_at   | Mlf1ip                | myeloid leukemia factor 1 interacting protein                                                          | Cluster0054_House keeping-nucleus |
| 1436707_x_at | Ncaph                 | non-SMC condensin I complex, subunit H                                                                 | Cluster0054_House keeping-nucleus |
| 1430530_s_at | Nmral1                | NmrA-like family domain containing 1                                                                   | Cluster0054_House keeping-nucleus |
| 1453562_a_at | Nmral1                | NmrA-like family domain containing 1                                                                   | Cluster0054_House keeping-nucleus |
| 1419397_at   | Pola1                 | polymerase (DNA directed), alpha 1                                                                     | Cluster0054_House keeping-nucleus |
| 1448650_a_at | Pole                  | polymerase (DNA directed), epsilon                                                                     | Cluster0054_House keeping-nucleus |
| 1436922_at   | Ppil5                 | peptidylprolyl isomerase (cyclophilin) like 5                                                          | Cluster0054_House keeping-nucleus |
| 1418036_at   | Prim2                 | DNA primase, p58 subunit                                                                               | Cluster0054_House keeping-nucleus |
| 1450862_at   | Rad54l                | RAD54 like ( <i>S. cerevisiae</i> )                                                                    | Cluster0054_House keeping-nucleus |
| 1424321_at   | Rfc4                  | replication factor C (activator 1) 4                                                                   | Cluster0054_House keeping-nucleus |
| 1423882_at   | Rfwd3                 | ring finger and WD repeat domain 3                                                                     | Cluster0054_House keeping-nucleus |

|              |                      |                                                                                                           |                                                                      |
|--------------|----------------------|-----------------------------------------------------------------------------------------------------------|----------------------------------------------------------------------|
| 1429660_s_at | Smc2                 | structural maintenance of chromosomes 2                                                                   | Cluster0054_House keeping-nucleus                                    |
| 1417587_at   | Timeless             | timeless homolog (Drosophila)                                                                             | Cluster0054_House keeping-nucleus                                    |
| 1452241_at   | Topbp1               | topoisomerase (DNA) II binding protein 1                                                                  | Cluster0054_House keeping-nucleus                                    |
| 1453547_at   | 1810046K07Rik        | RIKEN cDNA 1810046K07 gene                                                                                | Cluster0055_Intestinal chemosensory- and neuroendocrine cell-related |
| 1454592_at   | 9430012M22Rik        | RIKEN cDNA 9430012M22 gene                                                                                | Cluster0055_Intestinal chemosensory- and neuroendocrine cell-related |
| 1420451_at   | Accn5                | amiloride-sensitive cation channel 5, intestinal                                                          | Cluster0055_Intestinal chemosensory- and neuroendocrine cell-related |
| 1440327_at   | AI195470             | expressed sequence AI195470                                                                               | Cluster0055_Intestinal chemosensory- and neuroendocrine cell-related |
| 1419148_at   | Avil                 | advillin                                                                                                  | Cluster0055_Intestinal chemosensory- and neuroendocrine cell-related |
| 1446681_at   | BB086117             | expressed sequence BB086117                                                                               | Cluster0055_Intestinal chemosensory- and neuroendocrine cell-related |
| 1455653_at   | Ccnj                 | cyclin J                                                                                                  | Cluster0055_Intestinal chemosensory- and neuroendocrine cell-related |
| 1418724_at   | Cfi /// LOC100047470 | complement component factor i /// similar to complement component factor i                                | Cluster0055_Intestinal chemosensory- and neuroendocrine cell-related |
| 1440070_at   | Chat                 | choline acetyltransferase                                                                                 | Cluster0055_Intestinal chemosensory- and neuroendocrine cell-related |
| 1417651_at   | Cyp2c29              | cytochrome P450, family 2, subfamily c, polypeptide 29                                                    | Cluster0055_Intestinal chemosensory- and neuroendocrine cell-related |
| 1435940_at   | Dclk1                | doublecortin-like kinase 1                                                                                | Cluster0055_Intestinal chemosensory- and neuroendocrine cell-related |
| 1446190_at   | Dclk1                | doublecortin-like kinase 1                                                                                | Cluster0055_Intestinal chemosensory- and neuroendocrine cell-related |
| 1450863_a_at | Dclk1                | doublecortin-like kinase 1                                                                                | Cluster0055_Intestinal chemosensory- and neuroendocrine cell-related |
| 1433847_at   | Fam40b               | family with sequence similarity 40, member B                                                              | Cluster0055_Intestinal chemosensory- and neuroendocrine cell-related |
| 1436889_at   | Gabra1               | gamma-aminobutyric acid (GABA) A receptor, subunit alpha 1                                                | Cluster0055_Intestinal chemosensory- and neuroendocrine cell-related |
| 1455766_at   | Gabra1               | gamma-aminobutyric acid (GABA) A receptor, subunit alpha 1                                                | Cluster0055_Intestinal chemosensory- and neuroendocrine cell-related |
| 1440148_at   | Gpr6                 | G protein-coupled receptor 6                                                                              | Cluster0055_Intestinal chemosensory- and neuroendocrine cell-related |
| 1425804_at   | Hmx2                 | H6 homeobox 2                                                                                             | Cluster0055_Intestinal chemosensory- and neuroendocrine cell-related |
| 1422150_at   | Hmx3                 | H6 homeobox 3                                                                                             | Cluster0055_Intestinal chemosensory- and neuroendocrine cell-related |
| 1420740_at   | Il25                 | interleukin 25                                                                                            | Cluster0055_Intestinal chemosensory- and neuroendocrine cell-related |
| 1441429_at   | Irs4                 | insulin receptor substrate 4                                                                              | Cluster0055_Intestinal chemosensory- and neuroendocrine cell-related |
| 1421739_a_at | Matk                 | megakaryocyte-associated tyrosine kinase                                                                  | Cluster0055_Intestinal chemosensory- and neuroendocrine cell-related |
| 1439752_at   | Mboat4               | membrane bound O-acyltransferase domain containing 4                                                      | Cluster0055_Intestinal chemosensory- and neuroendocrine cell-related |
| 1430771_a_at | Msh5                 | mutS homolog 5 (E. coli)                                                                                  | Cluster0055_Intestinal chemosensory- and neuroendocrine cell-related |
| 1442091_at   | NA                   | ---                                                                                                       | Cluster0055_Intestinal chemosensory- and neuroendocrine cell-related |
| 1443799_at   | NA                   | ---                                                                                                       | Cluster0055_Intestinal chemosensory- and neuroendocrine cell-related |
| 1446324_at   | NA                   | ---                                                                                                       | Cluster0055_Intestinal chemosensory- and neuroendocrine cell-related |
| 1457378_at   | NA                   | ---                                                                                                       | Cluster0055_Intestinal chemosensory- and neuroendocrine cell-related |
| 1442263_at   | Rgs13                | regulator of G-protein signaling 13                                                                       | Cluster0055_Intestinal chemosensory- and neuroendocrine cell-related |
| 1430113_at   | Sh2d6                | SH2 domain containing 6                                                                                   | Cluster0055_Intestinal chemosensory- and neuroendocrine cell-related |
| 1424975_at   | Siglec5              | sialic acid binding Ig-like lectin 5                                                                      | Cluster0055_Intestinal chemosensory- and neuroendocrine cell-related |
| 1417954_at   | Sst                  | somatostatin                                                                                              | Cluster0055_Intestinal chemosensory- and neuroendocrine cell-related |
| 1425318_a_at | Tmem116              | transmembrane protein 116                                                                                 | Cluster0055_Intestinal chemosensory- and neuroendocrine cell-related |
| 1453710_at   | Tmem116              | transmembrane protein 116                                                                                 | Cluster0055_Intestinal chemosensory- and neuroendocrine cell-related |
| 1418783_at   | Trpm5                | transient receptor potential cation channel, subfamily M, member 5                                        | Cluster0055_Intestinal chemosensory- and neuroendocrine cell-related |
| 1443413_s_at | Trpm5                | transient receptor potential cation channel, subfamily M, member 5                                        | Cluster0055_Intestinal chemosensory- and neuroendocrine cell-related |
| 1449224_at   | Trpm5                | transient receptor potential cation channel, subfamily M, member 5                                        | Cluster0055_Intestinal chemosensory- and neuroendocrine cell-related |
| 1439140_at   | Ttll8                | tubulin tyrosine ligase-like family, member 8                                                             | Cluster0055_Intestinal chemosensory- and neuroendocrine cell-related |
| 1430143_at   | 4930426D05Rik        | RIKEN cDNA 4930426D05 gene                                                                                | Cluster0056_High in B cells                                          |
| 1439644_at   | 9630023C09Rik        | RIKEN cDNA 9630023C09 gene                                                                                | Cluster0056_High in B cells                                          |
| 1440162_x_at | A630043P06           | hypothetical protein A630043P06                                                                           | Cluster0056_High in B cells                                          |
| 1458649_at   | AI662245             | expressed sequence AI662245                                                                               | Cluster0056_High in B cells                                          |
| 1445301_at   | C920021L13Rik        | RIKEN cDNA C920021L13 gene                                                                                | Cluster0056_High in B cells                                          |
| 1437937_at   | Ccbp2                | chemokine binding protein 2                                                                               | Cluster0056_High in B cells                                          |
| 1441886_at   | Ccdc79               | coiled-coil domain containing 79                                                                          | Cluster0056_High in B cells                                          |
| 1442013_at   | Ccdc79               | coiled-coil domain containing 79                                                                          | Cluster0056_High in B cells                                          |
| 1421213_at   | Edaradd              | EDAR (ectodysplasin-A receptor)-associated death domain                                                   | Cluster0056_High in B cells                                          |
| 1433133_at   | Edaradd              | EDAR (ectodysplasin-A receptor)-associated death domain                                                   | Cluster0056_High in B cells                                          |
| 1437800_at   | Edaradd              | EDAR (ectodysplasin-A receptor)-associated death domain                                                   | Cluster0056_High in B cells                                          |
| 1442144_at   | Emid1                | EMI domain containing 1                                                                                   | Cluster0056_High in B cells                                          |
| 1425063_at   | Fcrl1                | Fc receptor-like 1                                                                                        | Cluster0056_High in B cells                                          |
| 1427629_at   | Gm13767 /// Ptprij   | protein tyrosine phosphatase, receptor type, J pseudogene /// protein tyrosine phosphatase, receptor type | Cluster0056_High in B cells                                          |
| 1448094_at   | Gm5914               | predicted gene 5914                                                                                       | Cluster0056_High in B cells                                          |
| 1427855_at   | Igk-V38              | Immunoglobulin kappa chain variable 38(V38)                                                               | Cluster0056_High in B cells                                          |



|              |                            |                                                                                                                |                                          |
|--------------|----------------------------|----------------------------------------------------------------------------------------------------------------|------------------------------------------|
| 1421620_at   | Il5ra                      | interleukin 5 receptor, alpha                                                                                  | Cluster0056_High in B cells              |
| 1428837_at   | Klh14                      | kelch-like 14 (Drosophila)                                                                                     | Cluster0056_High in B cells              |
| 1419560_at   | Lipc                       | lipase, hepatic                                                                                                | Cluster0056_High in B cells              |
| 1439893_at   | NA                         | ---                                                                                                            | Cluster0056_High in B cells              |
| 1440809_at   | NA                         | ---                                                                                                            | Cluster0056_High in B cells              |
| 1441627_at   | NA                         | ---                                                                                                            | Cluster0056_High in B cells              |
| 1441730_at   | NA                         | ---                                                                                                            | Cluster0056_High in B cells              |
| 1442343_at   | NA                         | ---                                                                                                            | Cluster0056_High in B cells              |
| 1443669_at   | NA                         | ---                                                                                                            | Cluster0056_High in B cells              |
| 1445581_at   | NA                         | ---                                                                                                            | Cluster0056_High in B cells              |
| 1457955_at   | NA                         | ---                                                                                                            | Cluster0056_High in B cells              |
| 1459040_at   | NA                         | ---                                                                                                            | Cluster0056_High in B cells              |
| 1459348_at   | NA                         | ---                                                                                                            | Cluster0056_High in B cells              |
| 1459412_at   | NA                         | ---                                                                                                            | Cluster0056_High in B cells              |
| 1418531_at   | Oosp1                      | oocyte secreted protein 1                                                                                      | Cluster0056_High in B cells              |
| 1427438_at   | Pip4k2b                    | phosphatidylinositol-5-phosphate 4-kinase, type II, beta                                                       | Cluster0056_High in B cells              |
| 1457186_at   | Tbl1xr1                    | transducin (beta)-like 1X-linked receptor 1                                                                    | Cluster0056_High in B cells              |
| 1421398_at   | Trim7                      | tripartite motif-containing 7                                                                                  | Cluster0056_High in B cells              |
| 1420587_at   | Tsga13                     | testis specific gene A13                                                                                       | Cluster0056_High in B cells              |
| 1445489_at   | Ttpal                      | tocopherol (alpha) transfer protein-like                                                                       | Cluster0056_High in B cells              |
| 1429606_at   | Ublcp1                     | ubiquitin-like domain containing CTD phosphatase 1                                                             | Cluster0056_High in B cells              |
| 1455449_at   | 2010107G12Rik              | RIKEN cDNA 2010107G12 gene                                                                                     | Cluster0057_High in colonic villi        |
| 1418661_at   | Abhd2                      | abhydrolase domain containing 2                                                                                | Cluster0057_High in colonic villi        |
| 1450572_at   | Akp3                       | alkaline phosphatase 3, intestine, not Mn requiring                                                            | Cluster0057_High in colonic villi        |
| 1431369_at   | Asap2                      | ArfGAP with SH3 domain, ankyrin repeat and PH domain 2                                                         | Cluster0057_High in colonic villi        |
| 1426843_at   | Atg2a                      | ATG2 autophagy related 2 homolog A (S. cerevisiae)                                                             | Cluster0057_High in colonic villi        |
| 1449907_at   | Bcno1                      | beta-carotene 15,15 -monooxygenase                                                                             | Cluster0057_High in colonic villi        |
| 1418734_at   | BE136769                   | expressed sequence BE136769                                                                                    | Cluster0057_High in colonic villi        |
| 1447394_at   | Clca6 /// Gm6289           | chloride channel calcium activated 6 /// predicted gene 6289                                                   | Cluster0057_High in colonic villi        |
| 1444010_at   | Eif4e                      | eukaryotic translation initiation factor 4E                                                                    | Cluster0057_High in colonic villi        |
| 1448980_at   | Ghrl                       | ghrelin                                                                                                        | Cluster0057_High in colonic villi        |
| 1450639_at   | Gm14085 /// Slc28a2        | predicted gene 14085 /// solute carrier family 28 (sodium-coupled nucleoside transporter), member 2            | Cluster0057_High in colonic villi        |
| 1457555_at   | Gpr151                     | G protein-coupled receptor 151                                                                                 | Cluster0057_High in colonic villi        |
| 1422280_at   | Gzmk                       | granzyme K                                                                                                     | Cluster0057_High in colonic villi        |
| 1450531_at   | H2-BI                      | histocompatibility 2, blastocyst                                                                               | Cluster0057_High in colonic villi        |
| 1419230_at   | Krt12                      | keratin 12                                                                                                     | Cluster0057_High in colonic villi        |
| 1448680_at   | LOC100046946 /// Serpina1c | similar to serine (or cysteine) proteinase inhibitor, clade A, member 1c /// serine (or cysteine) peptidase in | Cluster0057_High in colonic villi        |
| 1452565_x_at | LOC641050                  | hypothetical protein LOC641050                                                                                 | Cluster0057_High in colonic villi        |
| 1427285_s_at | Malat1                     | metastasis associated lung adenocarcinoma transcript 1 (non-coding RNA)                                        | Cluster0057_High in colonic villi        |
| 1452378_at   | Malat1                     | metastasis associated lung adenocarcinoma transcript 1 (non-coding RNA)                                        | Cluster0057_High in colonic villi        |
| 1449537_at   | Msh5                       | mutS homolog 5 (E. coli)                                                                                       | Cluster0057_High in colonic villi        |
| 1420461_at   | Mst1r                      | macrophage stimulating 1 receptor (c-met-related tyrosine kinase)                                              | Cluster0057_High in colonic villi        |
| 1438783_at   | NA                         | ---                                                                                                            | Cluster0057_High in colonic villi        |
| 1447123_at   | NA                         | ---                                                                                                            | Cluster0057_High in colonic villi        |
| 1426029_a_at | Nfat5                      | nuclear factor of activated T-cells 5                                                                          | Cluster0057_High in colonic villi        |
| 1457084_at   | Nlrp9b                     | NLR family, pyrin domain containing 9B                                                                         | Cluster0057_High in colonic villi        |
| 1418272_at   | Oxct2a                     | 3-oxoacid CoA transferase 2A                                                                                   | Cluster0057_High in colonic villi        |
| 1441026_at   | Parp4                      | poly (ADP-ribose) polymerase family, member 4                                                                  | Cluster0057_High in colonic villi        |
| 1429308_at   | Prdm16                     | PR domain containing 16                                                                                        | Cluster0057_High in colonic villi        |
| 1417909_at   | Serpinc1                   | serine (or cysteine) peptidase inhibitor, clade C (antithrombin), member 1                                     | Cluster0057_High in colonic villi        |
| 1426639_a_at | Tcf7l2                     | transcription factor 7-like 2, T-cell specific, HMG-box                                                        | Cluster0057_High in colonic villi        |
| 1427802_a_at | Tcrg-V4                    | T-cell receptor gamma, variable 4                                                                              | Cluster0057_High in colonic villi        |
| 1459216_at   | Tdrd7                      | Tudor domain containing 7                                                                                      | Cluster0057_High in colonic villi        |
| 1459099_at   | Tmc7                       | transmembrane channel-like gene family 7                                                                       | Cluster0057_High in colonic villi        |
| 1451916_s_at | Trim15                     | tripartite motif-containing 15                                                                                 | Cluster0057_High in colonic villi        |
| 1434894_at   | Zc3h13                     | zinc finger CCCH type containing 13                                                                            | Cluster0057_High in colonic villi        |
| 1429673_at   | 5830407E08Rik              | RIKEN cDNA 5830407E08 gene                                                                                     | Cluster0058_High in haematopoietic cells |

|              |                        |                                                                                           |                                          |
|--------------|------------------------|-------------------------------------------------------------------------------------------|------------------------------------------|
| 1434874_x_at | Acap1                  | ArfGAP with coiled-coil, ankyrin repeat and PH domains 1                                  | Cluster0058_High in haematopoietic cells |
| 1437117_at   | Acap1                  | ArfGAP with coiled-coil, ankyrin repeat and PH domains 1                                  | Cluster0058_High in haematopoietic cells |
| 1455125_at   | Acap1                  | ArfGAP with coiled-coil, ankyrin repeat and PH domains 1                                  | Cluster0058_High in haematopoietic cells |
| 1434873_a_at | Acap1 /// LOC100045877 | ArfGAP with coiled-coil, ankyrin repeat and PH domains 1 /// similar to Centaurin, beta 1 | Cluster0058_High in haematopoietic cells |
| 1451992_at   | Adrbk1                 | adrenergic receptor kinase, beta 1                                                        | Cluster0058_High in haematopoietic cells |
| 1427325_s_at | Akna                   | AT-hook transcription factor                                                              | Cluster0058_High in haematopoietic cells |
| 1429881_at   | Arhgap15               | Rho GTPase activating protein 15                                                          | Cluster0058_High in haematopoietic cells |
| 1419296_at   | Arhgap4                | Rho GTPase activating protein 4                                                           | Cluster0058_High in haematopoietic cells |
| 1436515_at   | Bach2                  | BTB and CNC homology 2                                                                    | Cluster0058_High in haematopoietic cells |
| 1427146_at   | Carns1                 | carnosine synthase 1                                                                      | Cluster0058_High in haematopoietic cells |
| 1438805_at   | Ccnd3                  | cyclin D3                                                                                 | Cluster0058_High in haematopoietic cells |
| 1416246_a_at | Coro1a                 | coronin, actin binding protein 1A                                                         | Cluster0058_High in haematopoietic cells |
| 1455269_a_at | Coro1a                 | coronin, actin binding protein 1A                                                         | Cluster0058_High in haematopoietic cells |
| 1460338_a_at | Crif3                  | cytokine receptor-like factor 3                                                           | Cluster0058_High in haematopoietic cells |
| 1431840_at   | Dennd1c                | DENN/MADD domain containing 1C                                                            | Cluster0058_High in haematopoietic cells |
| 1437121_at   | Dennd1c                | DENN/MADD domain containing 1C                                                            | Cluster0058_High in haematopoietic cells |
| 1436941_at   | Fam55c                 | family with sequence similarity 55, member C                                              | Cluster0058_High in haematopoietic cells |
| 1434359_at   | Fam65b                 | family with sequence similarity 65, member B                                              | Cluster0058_High in haematopoietic cells |
| 1453837_at   | Fam65b                 | family with sequence similarity 65, member B                                              | Cluster0058_High in haematopoietic cells |
| 1449988_at   | Gimap1                 | GTPase, IMAP family member 1                                                              | Cluster0058_High in haematopoietic cells |
| 1432160_at   | Git2                   | G protein-coupled receptor kinase-interactor 2                                            | Cluster0058_High in haematopoietic cells |
| 1428242_at   | Hmha1                  | histocompatibility (minor) HA-1                                                           | Cluster0058_High in haematopoietic cells |
| 1417391_a_at | Il16                   | interleukin 16                                                                            | Cluster0058_High in haematopoietic cells |
| 1437886_at   | Klhl6                  | kelch-like 6 (Drosophila)                                                                 | Cluster0058_High in haematopoietic cells |
| 1439468_at   | NA                     | ---                                                                                       | Cluster0058_High in haematopoietic cells |
| 1440304_at   | NA                     | ---                                                                                       | Cluster0058_High in haematopoietic cells |
| 1443263_at   | NA                     | ---                                                                                       | Cluster0058_High in haematopoietic cells |
| 1434334_at   | Prkd2                  | protein kinase D2                                                                         | Cluster0058_High in haematopoietic cells |
| 1455132_at   | Rasal3                 | RAS protein activator like 3                                                              | Cluster0058_High in haematopoietic cells |
| 1442264_at   | Rasgrp2                | RAS, guanyl releasing protein 2                                                           | Cluster0058_High in haematopoietic cells |
| 1424194_at   | Rcsd1                  | RCSL domain containing 1                                                                  | Cluster0058_High in haematopoietic cells |
| 1427007_at   | Sash3                  | SAM and SH3 domain containing 3                                                           | Cluster0058_High in haematopoietic cells |
| 1419481_at   | Sell                   | selectin, lymphocyte                                                                      | Cluster0058_High in haematopoietic cells |
| 1434573_at   | Traf3ip3               | TRAF3 interacting protein 3                                                               | Cluster0058_High in haematopoietic cells |
| 1444105_at   | Acta2                  | actin, alpha 2, smooth muscle, aorta                                                      | Cluster0059_Large intestine-related      |
| 1422340_a_at | Actg2                  | actin, gamma 2, smooth muscle, enteric                                                    | Cluster0059_Large intestine-related      |
| 1451129_at   | Calb2                  | calbindin 2                                                                               | Cluster0059_Large intestine-related      |
| 1421195_at   | Cckar                  | cholecystokinin A receptor                                                                | Cluster0059_Large intestine-related      |
| 1417917_at   | Cnn1                   | calponin 1                                                                                | Cluster0059_Large intestine-related      |
| 1438059_at   | Ctxn3                  | cortixin 3                                                                                | Cluster0059_Large intestine-related      |
| 1426731_at   | Des                    | desmin                                                                                    | Cluster0059_Large intestine-related      |
| 1434944_at   | Dmpk                   | dystrophia myotonica-protein kinase                                                       | Cluster0059_Large intestine-related      |
| 1434939_at   | Foxf1a                 | forkhead box F1a                                                                          | Cluster0059_Large intestine-related      |
| 1421400_at   | Kcnmb1                 | potassium large conductance calcium-activated channel, subfamily M, beta member 1         | Cluster0059_Large intestine-related      |
| 1427485_at   | Lmod1                  | leiomodion 1 (smooth muscle)                                                              | Cluster0059_Large intestine-related      |
| 1418122_at   | Myh11                  | myosin, heavy polypeptide 11, smooth muscle                                               | Cluster0059_Large intestine-related      |
| 1448962_at   | Myh11                  | myosin, heavy polypeptide 11, smooth muscle                                               | Cluster0059_Large intestine-related      |
| 1425504_at   | Mylk                   | myosin, light polypeptide kinase                                                          | Cluster0059_Large intestine-related      |
| 1425505_at   | Mylk                   | myosin, light polypeptide kinase                                                          | Cluster0059_Large intestine-related      |
| 1425978_at   | Myocd                  | myocardin                                                                                 | Cluster0059_Large intestine-related      |
| 1420693_at   | Myom1                  | myomesin 1                                                                                | Cluster0059_Large intestine-related      |
| 1420578_at   | Optc                   | opticin                                                                                   | Cluster0059_Large intestine-related      |
| 1443299_at   | Pdlim3                 | PDZ and LIM domain 3                                                                      | Cluster0059_Large intestine-related      |
| 1449178_at   | Pdlim3                 | PDZ and LIM domain 3                                                                      | Cluster0059_Large intestine-related      |
| 1423359_at   | Pln                    | phospholamban                                                                             | Cluster0059_Large intestine-related      |
| 1450952_at   | Pln                    | phospholamban                                                                             | Cluster0059_Large intestine-related      |
| 1434786_at   | Ppp1r12b               | protein phosphatase 1, regulatory (inhibitor) subunit 12B                                 | Cluster0059_Large intestine-related      |

|              |                              |                                                                                                              |                                                                   |
|--------------|------------------------------|--------------------------------------------------------------------------------------------------------------|-------------------------------------------------------------------|
| 1417466_at   | Rgs5                         | regulator of G-protein signaling 5                                                                           | Cluster0059_Large intestine-related                               |
| 1420941_at   | Rgs5                         | regulator of G-protein signaling 5                                                                           | Cluster0059_Large intestine-related                               |
| 1420942_s_at | Rgs5                         | regulator of G-protein signaling 5                                                                           | Cluster0059_Large intestine-related                               |
| 1435667_at   | Rims1                        | regulating synaptic membrane exocytosis 1                                                                    | Cluster0059_Large intestine-related                               |
| 1438305_at   | Rims1                        | regulating synaptic membrane exocytosis 1                                                                    | Cluster0059_Large intestine-related                               |
| 1418789_at   | Sntg2                        | syntrophin, gamma 2                                                                                          | Cluster0059_Large intestine-related                               |
| 1455610_at   | Synm                         | synemin, intermediate filament protein                                                                       | Cluster0059_Large intestine-related                               |
| 1457275_at   | Synm                         | synemin, intermediate filament protein                                                                       | Cluster0059_Large intestine-related                               |
| 1435399_at   | Synpo2                       | synaptopodin 2                                                                                               | Cluster0059_Large intestine-related                               |
| 1441206_at   | Synpo2                       | synaptopodin 2                                                                                               | Cluster0059_Large intestine-related                               |
| 1452879_at   | Synpo2                       | synaptopodin 2                                                                                               | Cluster0059_Large intestine-related                               |
| 1428984_a_at | 1700012B09Rik                | RIKEN cDNA 1700012B09 gene                                                                                   | Cluster0060_High in NIH3T3 embronic fibroblasts & C2C12 myoblasts |
| 1420702_at   | 1700093K21Rik                | RIKEN cDNA 1700093K21 gene                                                                                   | Cluster0060_High in NIH3T3 embronic fibroblasts & C2C12 myoblasts |
| 1453275_at   | 2310002L13Rik                | RIKEN cDNA 2310002L13 gene                                                                                   | Cluster0060_High in NIH3T3 embronic fibroblasts & C2C12 myoblasts |
| 1449356_at   | Asb5                         | ankyrin repeat and SOCs box-containing 5                                                                     | Cluster0060_High in NIH3T3 embronic fibroblasts & C2C12 myoblasts |
| 1419003_at   | Bves                         | blood vessel epicardial substance                                                                            | Cluster0060_High in NIH3T3 embronic fibroblasts & C2C12 myoblasts |
| 1439848_at   | Bves                         | blood vessel epicardial substance                                                                            | Cluster0060_High in NIH3T3 embronic fibroblasts & C2C12 myoblasts |
| 1422813_at   | Cacng1                       | calcium channel, voltage-dependent, gamma subunit 1                                                          | Cluster0060_High in NIH3T3 embronic fibroblasts & C2C12 myoblasts |
| 1418602_at   | Cdh15                        | cadherin 15                                                                                                  | Cluster0060_High in NIH3T3 embronic fibroblasts & C2C12 myoblasts |
| 1418852_at   | Chrna1                       | cholinergic receptor, nicotinic, alpha polypeptide 1 (muscle)                                                | Cluster0060_High in NIH3T3 embronic fibroblasts & C2C12 myoblasts |
| 1450475_at   | Dlx3                         | distal-less homeobox 3                                                                                       | Cluster0060_High in NIH3T3 embronic fibroblasts & C2C12 myoblasts |
| 1434993_at   | Fam5c                        | family with sequence similarity 5, member C                                                                  | Cluster0060_High in NIH3T3 embronic fibroblasts & C2C12 myoblasts |
| 1421040_a_at | Gsta2                        | glutathione S-transferase, alpha 2 (Yc2)                                                                     | Cluster0060_High in NIH3T3 embronic fibroblasts & C2C12 myoblasts |
| 1421426_at   | Hhip                         | Hedgehog-interacting protein                                                                                 | Cluster0060_High in NIH3T3 embronic fibroblasts & C2C12 myoblasts |
| 1438083_at   | Hhip                         | Hedgehog-interacting protein                                                                                 | Cluster0060_High in NIH3T3 embronic fibroblasts & C2C12 myoblasts |
| 1418393_a_at | Itga7                        | integrin alpha 7                                                                                             | Cluster0060_High in NIH3T3 embronic fibroblasts & C2C12 myoblasts |
| 1419288_at   | Jam2                         | junction adhesion molecule 2                                                                                 | Cluster0060_High in NIH3T3 embronic fibroblasts & C2C12 myoblasts |
| 1452707_at   | Klhl30                       | kelch-like 30 (Drosophila)                                                                                   | Cluster0060_High in NIH3T3 embronic fibroblasts & C2C12 myoblasts |
| 1444084_at   | LOC676960 /// Prrg4          | similar to Transmembrane gamma-carboxyglutamic acid protein 4 precursor (Proline-rich Gla protein 4) (Pr     | Cluster0060_High in NIH3T3 embronic fibroblasts & C2C12 myoblasts |
| 1420551_at   | Murc                         | muscle-related coiled-coil protein                                                                           | Cluster0060_High in NIH3T3 embronic fibroblasts & C2C12 myoblasts |
| 1420757_at   | Myf5                         | myogenic factor 5                                                                                            | Cluster0060_High in NIH3T3 embronic fibroblasts & C2C12 myoblasts |
| 1418420_at   | Myod1                        | myogenic differentiation 1                                                                                   | Cluster0060_High in NIH3T3 embronic fibroblasts & C2C12 myoblasts |
| 1426255_at   | Nefl                         | neurofilament, light polypeptide                                                                             | Cluster0060_High in NIH3T3 embronic fibroblasts & C2C12 myoblasts |
| 1454672_at   | Nefl                         | neurofilament, light polypeptide                                                                             | Cluster0060_High in NIH3T3 embronic fibroblasts & C2C12 myoblasts |
| 1418289_at   | Nes                          | nestin                                                                                                       | Cluster0060_High in NIH3T3 embronic fibroblasts & C2C12 myoblasts |
| 1449022_at   | Nes                          | nestin                                                                                                       | Cluster0060_High in NIH3T3 embronic fibroblasts & C2C12 myoblasts |
| 1453997_a_at | Nes                          | nestin                                                                                                       | Cluster0060_High in NIH3T3 embronic fibroblasts & C2C12 myoblasts |
| 1428356_at   | Osbp2                        | oxysterol binding protein 2                                                                                  | Cluster0060_High in NIH3T3 embronic fibroblasts & C2C12 myoblasts |
| 1450482_a_at | Pitx2                        | paired-like homeodomain transcription factor 2                                                               | Cluster0060_High in NIH3T3 embronic fibroblasts & C2C12 myoblasts |
| 1423856_at   | Popdc3                       | popeye domain containing 3                                                                                   | Cluster0060_High in NIH3T3 embronic fibroblasts & C2C12 myoblasts |
| 1427760_s_at | Prl2c2 /// Prl2c3 /// Prl2c4 | prolactin family 2, subfamily c, member 2 /// prolactin family 2, subfamily c, member 3 /// prolactin family | Cluster0060_High in NIH3T3 embronic fibroblasts & C2C12 myoblasts |
| 1450158_at   | Rem1                         | rad and gem related GTP binding protein 1                                                                    | Cluster0060_High in NIH3T3 embronic fibroblasts & C2C12 myoblasts |
| 1442308_at   | Smyd4                        | SET and MYND domain containing 4                                                                             | Cluster0060_High in NIH3T3 embronic fibroblasts & C2C12 myoblasts |
| 1432349_a_at | Sync                         | syncoilin                                                                                                    | Cluster0060_High in NIH3T3 embronic fibroblasts & C2C12 myoblasts |
| 1436361_at   | Vgll2                        | vestigial like 2 homolog (Drosophila)                                                                        | Cluster0060_High in NIH3T3 embronic fibroblasts & C2C12 myoblasts |
| 1430419_at   | 2310031A07Rik                | RIKEN cDNA 2310031A07 gene                                                                                   | Cluster0061_High in CD8+ DC                                       |
| 1455241_at   | BC037703                     | cDNA sequence BC037703                                                                                       | Cluster0061_High in CD8+ DC                                       |
| 1425243_at   | Cd207                        | CD207 antigen                                                                                                | Cluster0061_High in CD8+ DC                                       |
| 1436127_at   | Crhbp                        | corticotropin releasing hormone binding protein                                                              | Cluster0061_High in CD8+ DC                                       |
| 1450671_at   | Cryba1                       | crystallin, beta A1                                                                                          | Cluster0061_High in CD8+ DC                                       |
| 1419141_at   | Crygd                        | crystallin, gamma D                                                                                          | Cluster0061_High in CD8+ DC                                       |
| 1420453_at   | Crygs                        | crystallin, gamma S                                                                                          | Cluster0061_High in CD8+ DC                                       |
| 1456907_at   | Cxcl9                        | chemokine (C-X-C motif) ligand 9                                                                             | Cluster0061_High in CD8+ DC                                       |
| 1418028_at   | Dct                          | dopachrome tautomerase                                                                                       | Cluster0061_High in CD8+ DC                                       |
| 1456481_at   | Esy3                         | extended synaptotagmin-like protein 3                                                                        | Cluster0061_High in CD8+ DC                                       |
| 1444367_at   | Fndc7                        | fibronectin type III domain containing 7                                                                     | Cluster0061_High in CD8+ DC                                       |
| 1445930_at   | Fndc7                        | fibronectin type III domain containing 7                                                                     | Cluster0061_High in CD8+ DC                                       |

|              |                                   |                                                                                                           |                                      |
|--------------|-----------------------------------|-----------------------------------------------------------------------------------------------------------|--------------------------------------|
| 1451708_at   | Gpr33                             | G protein-coupled receptor 33                                                                             | Cluster0061_High in CD8+ DC          |
| 1457745_at   | Gpr4                              | G protein-coupled receptor 4                                                                              | Cluster0061_High in CD8+ DC          |
| 1435332_at   | Htr7                              | 5-hydroxytryptamine (serotonin) receptor 7                                                                | Cluster0061_High in CD8+ DC          |
| 1430635_at   | Mlana                             | melan-A                                                                                                   | Cluster0061_High in CD8+ DC          |
| 1443141_at   | NA                                | ---                                                                                                       | Cluster0061_High in CD8+ DC          |
| 1444189_at   | NA                                | ---                                                                                                       | Cluster0061_High in CD8+ DC          |
| 1452068_at   | Naaa                              | N-acylethanolamine acid amidase                                                                           | Cluster0061_High in CD8+ DC          |
| 1422121_at   | Oprd1                             | opioid receptor, delta 1                                                                                  | Cluster0061_High in CD8+ DC          |
| 1422159_at   | Ppef2                             | protein phosphatase, EF hand calcium-binding domain 2                                                     | Cluster0061_High in CD8+ DC          |
| 1423859_a_at | Ptgds                             | prostaglandin D2 synthase (brain)                                                                         | Cluster0061_High in CD8+ DC          |
| 1423860_at   | Ptgds                             | prostaglandin D2 synthase (brain)                                                                         | Cluster0061_High in CD8+ DC          |
| 1422523_at   | Si                                | silver                                                                                                    | Cluster0061_High in CD8+ DC          |
| 1418935_at   | Trpm1                             | transient receptor potential cation channel, subfamily M, member 1                                        | Cluster0061_High in CD8+ DC          |
| 1417717_a_at | Tyr                               | tyrosinase                                                                                                | Cluster0061_High in CD8+ DC          |
| 1456095_at   | Tyr                               | tyrosinase                                                                                                | Cluster0061_High in CD8+ DC          |
| 1415861_at   | Tyrp1                             | tyrosinase-related protein 1                                                                              | Cluster0061_High in CD8+ DC          |
| 1415862_at   | Tyrp1                             | tyrosinase-related protein 1                                                                              | Cluster0061_High in CD8+ DC          |
| 1439409_x_at | Tyrp1                             | tyrosinase-related protein 1                                                                              | Cluster0061_High in CD8+ DC          |
| 1422294_at   | Xcr1                              | chemokine (C motif) receptor 1                                                                            | Cluster0061_High in CD8+ DC          |
| 1453870_at   | 1810018F18Rik                     | RIKEN cDNA 1810018F18 gene                                                                                | Cluster0062_Low in some Paneth cells |
| 1433117_at   | 2300004M11Rik                     | RIKEN cDNA 2300004M11 gene                                                                                | Cluster0062_Low in some Paneth cells |
| 1430994_at   |                                   | Mar-05 membrane-associated ring finger (C3HC4) 5                                                          | Cluster0062_Low in some Paneth cells |
| 1430467_at   | 4921511H03Rik                     | RIKEN cDNA 4921511H03 gene                                                                                | Cluster0062_Low in some Paneth cells |
| 1432402_at   | 4930402F11Rik                     | RIKEN cDNA 4930402F11 gene                                                                                | Cluster0062_Low in some Paneth cells |
| 1432085_at   | 4930425O10Rik                     | RIKEN cDNA 4930425O10 gene                                                                                | Cluster0062_Low in some Paneth cells |
| 1432933_at   | 4930429N05Rik                     | RIKEN cDNA 4930429N05 gene                                                                                | Cluster0062_Low in some Paneth cells |
| 1433232_at   | 4933426I03Rik                     | RIKEN cDNA 4933426I03 gene                                                                                | Cluster0062_Low in some Paneth cells |
| 1433202_at   | 6030400A10Rik                     | RIKEN cDNA 6030400A10 gene                                                                                | Cluster0062_Low in some Paneth cells |
| 1439954_at   | 6430514M23Rik                     | RIKEN cDNA 6430514M23 gene                                                                                | Cluster0062_Low in some Paneth cells |
| 1419939_at   | Arhgef17                          | Rho guanine nucleotide exchange factor (GEF) 17                                                           | Cluster0062_Low in some Paneth cells |
| 1444907_at   | AU022138                          | expressed sequence AU022138                                                                               | Cluster0062_Low in some Paneth cells |
| 1448588_at   | Cd320                             | CD320 antigen                                                                                             | Cluster0062_Low in some Paneth cells |
| 1449309_at   | Cyp8b1                            | cytochrome P450, family 8, subfamily b, polypeptide 1                                                     | Cluster0062_Low in some Paneth cells |
| 1419948_at   | D4ErtD117e                        | DNA segment, Chr 4, ERATO Doi 117, expressed                                                              | Cluster0062_Low in some Paneth cells |
| 1445761_at   | D4ErtD628e                        | DNA segment, Chr 4, ERATO Doi 628, expressed                                                              | Cluster0062_Low in some Paneth cells |
| 1449994_at   | Epgn                              | epithelial mitogen                                                                                        | Cluster0062_Low in some Paneth cells |
| 1420599_at   | Gm11554 /// Gm11569 /// Krtap4-13 | predicted gene 11554 /// predicted gene 11569 /// keratin associated protein 4-1:                         | Cluster0062_Low in some Paneth cells |
| 1458671_at   | Gm9461                            | predicted gene 9461                                                                                       | Cluster0062_Low in some Paneth cells |
| 1421608_at   | Il20                              | interleukin 20                                                                                            | Cluster0062_Low in some Paneth cells |
| 1441016_at   | NA                                | ---                                                                                                       | Cluster0062_Low in some Paneth cells |
| 1446093_at   | NA                                | ---                                                                                                       | Cluster0062_Low in some Paneth cells |
| 1446514_at   | NA                                | ---                                                                                                       | Cluster0062_Low in some Paneth cells |
| 1446775_at   | NA                                | ---                                                                                                       | Cluster0062_Low in some Paneth cells |
| 1446918_at   | NA                                | ---                                                                                                       | Cluster0062_Low in some Paneth cells |
| 1458287_at   | NA                                | ---                                                                                                       | Cluster0062_Low in some Paneth cells |
| 1458767_at   | NA                                | ---                                                                                                       | Cluster0062_Low in some Paneth cells |
| 1430486_at   | Rad511                            | RAD51-like 1 ( <i>S. cerevisiae</i> )                                                                     | Cluster0062_Low in some Paneth cells |
| 1438949_at   | Ric8                              | resistance to inhibitors of cholinesterase 8 homolog ( <i>C. elegans</i> )                                | Cluster0062_Low in some Paneth cells |
| 1437407_at   | Rnf222                            | ring finger protein 222                                                                                   | Cluster0062_Low in some Paneth cells |
| 1420240_at   | Smarcd1                           | SWI/SNF related, matrix associated, actin dependent regulator of chromatin, subfamily d, member 1         | Cluster0062_Low in some Paneth cells |
| 1430770_at   | 3110080E11Rik                     | RIKEN cDNA 3110080E11 gene                                                                                | Cluster0063_Lymph node-related       |
| 1426168_a_at | A130082M07Rik /// Tcra            | RIKEN cDNA A130082M07 gene /// T-cell receptor alpha chain                                                | Cluster0063_Lymph node-related       |
| 1430584_s_at | Car3                              | carbonic anhydrase 3                                                                                      | Cluster0063_Lymph node-related       |
| 1453588_at   | Car3                              | carbonic anhydrase 3                                                                                      | Cluster0063_Lymph node-related       |
| 1419426_s_at | Ccl21a /// Ccl21b /// Ccl21c      | chemokine (C-C motif) ligand 21A /// chemokine (C-C motif) ligand 21B /// chemokine (C-C motif) ligand 21 | Cluster0063_Lymph node-related       |
| 1417925_at   | Ccl22                             | chemokine (C-C motif) ligand 22                                                                           | Cluster0063_Lymph node-related       |
| 1426157_a_at | Cd209b                            | CD209b antigen                                                                                            | Cluster0063_Lymph node-related       |

|              |                |                                                                                               |                                                   |
|--------------|----------------|-----------------------------------------------------------------------------------------------|---------------------------------------------------|
| 1456895_at   | Cd209b         | CD209b antigen                                                                                | Cluster0063_Lymph node-related                    |
| 1452539_a_at | Cd247          | CD247 antigen                                                                                 | Cluster0063_Lymph node-related                    |
| 1453131_at   | Cd300lg        | CD300 antigen like family member G                                                            | Cluster0063_Lymph node-related                    |
| 1427779_a_at | Cd4            | CD4 antigen                                                                                   | Cluster0063_Lymph node-related                    |
| 1417867_at   | Cfd            | complement factor D (adipsin)                                                                 | Cluster0063_Lymph node-related                    |
| 1415994_at   | Cyp2e1         | cytochrome P450, family 2, subfamily e, polypeptide 1                                         | Cluster0063_Lymph node-related                    |
| 1434534_at   | Dsc3           | desmocollin 3                                                                                 | Cluster0063_Lymph node-related                    |
| 1448136_at   | Enpp2          | ectonucleotide pyrophosphatase/phosphodiesterase 2                                            | Cluster0063_Lymph node-related                    |
| 1424825_a_at | Glycam1        | glycosylation dependent cell adhesion molecule 1                                              | Cluster0063_Lymph node-related                    |
| 1426174_s_at | Igh-3 /// Ighg | immunoglobulin heavy chain 3 (serum IgG2b) /// Immunoglobulin heavy chain (gamma polypeptide) | Cluster0063_Lymph node-related                    |
| 1425324_x_at | Igh-6          | Immunoglobulin heavy chain 6 (heavy chain of IgM)                                             | Cluster0063_Lymph node-related                    |
| 1427756_x_at | Igh-6          | Immunoglobulin heavy chain 6 (heavy chain of IgM)                                             | Cluster0063_Lymph node-related                    |
| 1427870_x_at | Igh-6          | Immunoglobulin heavy chain 6 (heavy chain of IgM)                                             | Cluster0063_Lymph node-related                    |
| 1442544_at   | Igh-6          | Immunoglobulin heavy chain 6 (heavy chain of IgM)                                             | Cluster0063_Lymph node-related                    |
| 1424631_a_at | Ighg           | Immunoglobulin heavy chain (gamma polypeptide)                                                | Cluster0063_Lymph node-related                    |
| 1425247_a_at | Ighg1          | immunoglobulin heavy constant gamma 1 (G1m marker)                                            | Cluster0063_Lymph node-related                    |
| 1443179_at   | NA             | ---                                                                                           | Cluster0063_Lymph node-related                    |
| 1443718_at   | NA             | ---                                                                                           | Cluster0063_Lymph node-related                    |
| 1449182_at   | Retn           | resistin                                                                                      | Cluster0063_Lymph node-related                    |
| 1450461_at   | Tcf7           | transcription factor 7, T-cell specific                                                       | Cluster0063_Lymph node-related                    |
| 1450790_at   | Tg             | thyroglobulin                                                                                 | Cluster0063_Lymph node-related                    |
| 1422973_a_at | Thrsp          | thyroid hormone responsive SPOT14 homolog (Rattus)                                            | Cluster0063_Lymph node-related                    |
| 1424737_at   | Thrsp          | thyroid hormone responsive SPOT14 homolog (Rattus)                                            | Cluster0063_Lymph node-related                    |
| 1440884_s_at | A530047J11Rik  | RIKEN cDNA A530047J11 gene                                                                    | Cluster0064_Extracellular matrix-related          |
| 1426869_at   | Boc            | biregional cell adhesion molecule-related/down-regulated by oncogenes (Cdon) binding protein  | Cluster0064_Extracellular matrix-related          |
| 1427516_a_at | Boc            | biregional cell adhesion molecule-related/down-regulated by oncogenes (Cdon) binding protein  | Cluster0064_Extracellular matrix-related          |
| 1427528_a_at | Epha7          | Eph receptor A7                                                                               | Cluster0064_Extracellular matrix-related          |
| 1442542_at   | Eya4           | eyes absent 4 homolog (Drosophila)                                                            | Cluster0064_Extracellular matrix-related          |
| 1456647_a_at | Eya4           | eyes absent 4 homolog (Drosophila)                                                            | Cluster0064_Extracellular matrix-related          |
| 1456665_at   | Eya4           | eyes absent 4 homolog (Drosophila)                                                            | Cluster0064_Extracellular matrix-related          |
| 1459749_s_at | Fat4           | FAT tumor suppressor homolog 4 (Drosophila)                                                   | Cluster0064_Extracellular matrix-related          |
| 1460574_at   | Fat4           | FAT tumor suppressor homolog 4 (Drosophila)                                                   | Cluster0064_Extracellular matrix-related          |
| 1416164_at   | Fbln5          | fibulin 5                                                                                     | Cluster0064_Extracellular matrix-related          |
| 1422831_at   | Fbn2           | fibrillin 2                                                                                   | Cluster0064_Extracellular matrix-related          |
| 1456220_at   | Fbxl7          | F-box and leucine-rich repeat protein 7                                                       | Cluster0064_Extracellular matrix-related          |
| 1429403_x_at | Glt8d2         | glycosyltransferase 8 domain containing 2                                                     | Cluster0064_Extracellular matrix-related          |
| 1434423_at   | Gulp1          | GULP, engulfment adaptor PTB domain containing 1                                              | Cluster0064_Extracellular matrix-related          |
| 1439665_at   | Lpar4          | lysophosphatidic acid receptor 4                                                              | Cluster0064_Extracellular matrix-related          |
| 1452424_at   | Lpar4          | lysophosphatidic acid receptor 4                                                              | Cluster0064_Extracellular matrix-related          |
| 1437568_at   | Mmp16          | matrix metalloproteinase 16                                                                   | Cluster0064_Extracellular matrix-related          |
| 1440161_at   | Mmp16          | matrix metalloproteinase 16                                                                   | Cluster0064_Extracellular matrix-related          |
| 1454867_at   | Mn1            | meningioma 1                                                                                  | Cluster0064_Extracellular matrix-related          |
| 1439990_at   | NA             | ---                                                                                           | Cluster0064_Extracellular matrix-related          |
| 1443219_at   | NA             | ---                                                                                           | Cluster0064_Extracellular matrix-related          |
| 1458660_at   | NA             | ---                                                                                           | Cluster0064_Extracellular matrix-related          |
| 1423516_a_at | Nid2           | nidogen 2                                                                                     | Cluster0064_Extracellular matrix-related          |
| 1426851_a_at | Nov            | nephroblastoma overexpressed gene                                                             | Cluster0064_Extracellular matrix-related          |
| 1426852_x_at | Nov            | nephroblastoma overexpressed gene                                                             | Cluster0064_Extracellular matrix-related          |
| 1419662_at   | Ogn            | osteoglycin                                                                                   | Cluster0064_Extracellular matrix-related          |
| 1419663_at   | Ogn            | osteoglycin                                                                                   | Cluster0064_Extracellular matrix-related          |
| 1451204_at   | Scara5         | scavenger receptor class A, member 5 (putative)                                               | Cluster0064_Extracellular matrix-related          |
| 1450805_at   | Sgcd           | sarcoglycan, delta (dystrophin-associated glycoprotein)                                       | Cluster0064_Extracellular matrix-related          |
| 1451816_at   | Zfp451         | zinc finger protein 451                                                                       | Cluster0064_Extracellular matrix-related          |
| 1432976_at   | Z310038E17Rik  | RIKEN cDNA Z310038E17 gene                                                                    | Cluster0065_FAE- and Peyer's patch M cell-related |
| 1449426_a_at | Anxa10         | annexin A10                                                                                   | Cluster0065_FAE- and Peyer's patch M cell-related |
| 1422396_s_at | Ascl2          | achaete-scute complex homolog 2 (Drosophila)                                                  | Cluster0065_FAE- and Peyer's patch M cell-related |
| 1422639_at   | Calcb          | calcitonin-related polypeptide, beta                                                          | Cluster0065_FAE- and Peyer's patch M cell-related |

|              |                 |                                                                                 |                                                   |
|--------------|-----------------|---------------------------------------------------------------------------------|---------------------------------------------------|
| 1422029_at   | Ccl20           | chemokine (C-C motif) ligand 20                                                 | Cluster0065_FAE- and Peyer's patch M cell-related |
| 1427767_a_at | Cftr            | cystic fibrosis transmembrane conductance regulator homolog                     | Cluster0065_FAE- and Peyer's patch M cell-related |
| 1419463_at   | Clca2           | chloride channel calcium activated 2                                            | Cluster0065_FAE- and Peyer's patch M cell-related |
| 1437578_at   | Clca2           | chloride channel calcium activated 2                                            | Cluster0065_FAE- and Peyer's patch M cell-related |
| 1444965_at   | E130002L11Rik   | RIKEN cDNA E130002L11 gene                                                      | Cluster0065_FAE- and Peyer's patch M cell-related |
| 1451600_s_at | Es31 /// Gm4738 | esterase 31 /// predicted gene 4738                                             | Cluster0065_FAE- and Peyer's patch M cell-related |
| 1418376_at   | Fgf15           | fibroblast growth factor 15                                                     | Cluster0065_FAE- and Peyer's patch M cell-related |
| 1427776_a_at | Fgfr4           | fibroblast growth factor receptor 4                                             | Cluster0065_FAE- and Peyer's patch M cell-related |
| 1423271_at   | Gjb2            | gap junction protein, beta 2                                                    | Cluster0065_FAE- and Peyer's patch M cell-related |
| 1445150_at   | Gm10399         | predicted gene 10399                                                            | Cluster0065_FAE- and Peyer's patch M cell-related |
| 1449452_a_at | Gp2             | glycoprotein 2 (zymogen granule membrane)                                       | Cluster0065_FAE- and Peyer's patch M cell-related |
| 1455466_at   | Gpr133          | G protein-coupled receptor 133                                                  | Cluster0065_FAE- and Peyer's patch M cell-related |
| 1451297_at   | Gulo            | gulonolactone (L-) oxidase                                                      | Cluster0065_FAE- and Peyer's patch M cell-related |
| 1417416_at   | Kcna1           | potassium voltage-gated channel, shaker-related subfamily, member 1             | Cluster0065_FAE- and Peyer's patch M cell-related |
| 1437230_at   | Kcna1           | potassium voltage-gated channel, shaker-related subfamily, member 1             | Cluster0065_FAE- and Peyer's patch M cell-related |
| 1455785_at   | Kcna1           | potassium voltage-gated channel, shaker-related subfamily, member 1             | Cluster0065_FAE- and Peyer's patch M cell-related |
| 1435354_at   | Kcnj15          | potassium inwardly-rectifying channel, subfamily J, member 15                   | Cluster0065_FAE- and Peyer's patch M cell-related |
| 1450185_a_at | Kcnj15          | potassium inwardly-rectifying channel, subfamily J, member 15                   | Cluster0065_FAE- and Peyer's patch M cell-related |
| 1422087_at   | Mycl1           | v-myc myelocytomatosis viral oncogene homolog 1, lung carcinoma derived (avian) | Cluster0065_FAE- and Peyer's patch M cell-related |
| 1422088_at   | Mycl1           | v-myc myelocytomatosis viral oncogene homolog 1, lung carcinoma derived (avian) | Cluster0065_FAE- and Peyer's patch M cell-related |
| 1419775_at   | NA              | ---                                                                             | Cluster0065_FAE- and Peyer's patch M cell-related |
| 1431169_at   | Pgap1           | post-GPI attachment to proteins 1                                               | Cluster0065_FAE- and Peyer's patch M cell-related |
| 1421658_x_at | Psg18           | pregnancy specific glycoprotein 18                                              | Cluster0065_FAE- and Peyer's patch M cell-related |
| 1426466_s_at | Rps6kl1         | ribosomal protein S6 kinase-like 1                                              | Cluster0065_FAE- and Peyer's patch M cell-related |
| 1419762_at   | Ubd             | ubiquitin D                                                                     | Cluster0065_FAE- and Peyer's patch M cell-related |
| 1453307_a_at | Anapc5          | anaphase-promoting complex subunit 5                                            | Cluster0066_House keeping-cel cycle               |
| 1450846_at   | Bzw1            | basic leucine zipper and W2 domains 1                                           | Cluster0066_House keeping-cel cycle               |
| 1448348_at   | Caprin1         | cell cycle associated protein 1                                                 | Cluster0066_House keeping-cel cycle               |
| 1460549_a_at | Cdc23           | CDC23 (cell division cycle 23, yeast, homolog)                                  | Cluster0066_House keeping-cel cycle               |
| 1427037_at   | Eif4g1          | eukaryotic translation initiation factor 4, gamma 1                             | Cluster0066_House keeping-cel cycle               |
| 1438686_at   | Eif4g1          | eukaryotic translation initiation factor 4, gamma 1                             | Cluster0066_House keeping-cel cycle               |
| 1434370_s_at | Faf1            | Fas-associated factor 1                                                         | Cluster0066_House keeping-cel cycle               |
| 1431465_s_at | Fyttd1          | forty-two-three domain containing 1                                             | Cluster0066_House keeping-cel cycle               |
| 1440720_s_at | Gle1            | GLE1 RNA export mediator (yeast)                                                | Cluster0066_House keeping-cel cycle               |
| 1438040_a_at | Hsp90b1         | heat shock protein 90, beta (Grp94), member 1                                   | Cluster0066_House keeping-cel cycle               |
| 1415843_at   | Mlst8           | MTOR associated protein, LST8 homolog (S. cerevisiae)                           | Cluster0066_House keeping-cel cycle               |
| 1429878_a_at | Nupl1           | nucleoporin like 1                                                              | Cluster0066_House keeping-cel cycle               |
| 1421015_s_at | Pole3           | polymerase (DNA directed), epsilon 3 (p17 subunit)                              | Cluster0066_House keeping-cel cycle               |
| 1431768_a_at | Prmt3           | protein arginine N-methyltransferase 3                                          | Cluster0066_House keeping-cel cycle               |
| 1423697_at   | Psmc6           | proteasome (prosome, macropain) 26S subunit, non-ATPase, 6                      | Cluster0066_House keeping-cel cycle               |
| 1454791_a_at | Rbbp4           | retinoblastoma binding protein 4                                                | Cluster0066_House keeping-cel cycle               |
| 1454875_a_at | Rbbp4           | retinoblastoma binding protein 4                                                | Cluster0066_House keeping-cel cycle               |
| 1448042_s_at | Rnf2            | ring finger protein 2                                                           | Cluster0066_House keeping-cel cycle               |
| 1451072_a_at | Rnf4            | ring finger protein 4                                                           | Cluster0066_House keeping-cel cycle               |
| 1429941_at   | Slc10a7         | solute carrier family 10 (sodium/bile acid cotransporter family), member 7      | Cluster0066_House keeping-cel cycle               |
| 1419361_at   | Ss18            | synovial sarcoma translocation, Chromosome 18                                   | Cluster0066_House keeping-cel cycle               |
| 1416421_a_at | Ssb             | Sjogren syndrome antigen B                                                      | Cluster0066_House keeping-cel cycle               |
| 1422769_at   | Syncrip         | synaptotagmin binding, cytoplasmic RNA interacting protein                      | Cluster0066_House keeping-cel cycle               |
| 1450743_s_at | Syncrip         | synaptotagmin binding, cytoplasmic RNA interacting protein                      | Cluster0066_House keeping-cel cycle               |
| 1419257_at   | Tcea1           | transcription elongation factor A (SII) 1                                       | Cluster0066_House keeping-cel cycle               |
| 1425592_at   | Tnpo2           | transportin 2 (importin 3, karyopherin beta 2b)                                 | Cluster0066_House keeping-cel cycle               |
| 1432207_a_at | Toe1            | target of EGR1, member 1 (nuclear)                                              | Cluster0066_House keeping-cel cycle               |
| 1416774_at   | Wee1            | WEE 1 homolog 1 (S. pombe)                                                      | Cluster0066_House keeping-cel cycle               |
| 1425097_a_at | Zfp106          | zinc finger protein 106                                                         | Cluster0066_House keeping-cel cycle               |
| 1427508_at   | Arsi            | arylsulfatase i                                                                 | Cluster0067_Chondrocyte and osteoblast-related    |
| 1426418_at   | Atoh8           | atonal homolog 8 (Drosophila)                                                   | Cluster0067_Chondrocyte and osteoblast-related    |
| 1422606_at   | C1qtnf3         | C1q and tumor necrosis factor related protein 3                                 | Cluster0067_Chondrocyte and osteoblast-related    |

|              |               |                                                                              |                                                  |
|--------------|---------------|------------------------------------------------------------------------------|--------------------------------------------------|
| 1424187_at   | Ccdc80        | coiled-coil domain containing 80                                             | Cluster0067_Chondrocyte and osteoblast-related   |
| 1418599_at   | Col11a1       | collagen, type XI, alpha 1                                                   | Cluster0067_Chondrocyte and osteoblast-related   |
| 1449154_at   | Col11a1       | collagen, type XI, alpha 1                                                   | Cluster0067_Chondrocyte and osteoblast-related   |
| 1423352_at   | Crispld1      | cysteine-rich secretory protein LCCL domain containing 1                     | Cluster0067_Chondrocyte and osteoblast-related   |
| 1421114_a_at | Epyc          | epiphycan                                                                    | Cluster0067_Chondrocyte and osteoblast-related   |
| 1460412_at   | Fbln7         | fibulin 7                                                                    | Cluster0067_Chondrocyte and osteoblast-related   |
| 1454830_at   | Fbn2          | fibrillin 2                                                                  | Cluster0067_Chondrocyte and osteoblast-related   |
| 1420847_a_at | Fgfr2         | fibroblast growth factor receptor 2                                          | Cluster0067_Chondrocyte and osteoblast-related   |
| 1448194_a_at | H19           | H19 fetal liver mRNA                                                         | Cluster0067_Chondrocyte and osteoblast-related   |
| 1415931_at   | Igf2          | insulin-like growth factor 2                                                 | Cluster0067_Chondrocyte and osteoblast-related   |
| 1448152_at   | Igf2          | insulin-like growth factor 2                                                 | Cluster0067_Chondrocyte and osteoblast-related   |
| 1448870_at   | Ltbp1         | latent transforming growth factor beta binding protein 1                     | Cluster0067_Chondrocyte and osteoblast-related   |
| 1423294_at   | Mest          | mesoderm specific transcript                                                 | Cluster0067_Chondrocyte and osteoblast-related   |
| 1419608_a_at | Mia1          | melanoma inhibitory activity 1                                               | Cluster0067_Chondrocyte and osteoblast-related   |
| 1445268_at   | NA            | ---                                                                          | Cluster0067_Chondrocyte and osteoblast-related   |
| 1450078_at   | Nrk           | Nik related kinase                                                           | Cluster0067_Chondrocyte and osteoblast-related   |
| 1450079_at   | Nrk           | Nik related kinase                                                           | Cluster0067_Chondrocyte and osteoblast-related   |
| 1418745_at   | Omd           | osteomodulin                                                                 | Cluster0067_Chondrocyte and osteoblast-related   |
| 1416686_at   | Plod2         | procollagen lysine, 2-oxoglutarate 5-dioxygenase 2                           | Cluster0067_Chondrocyte and osteoblast-related   |
| 1416687_at   | Plod2         | procollagen lysine, 2-oxoglutarate 5-dioxygenase 2                           | Cluster0067_Chondrocyte and osteoblast-related   |
| 1417092_at   | Pth1r         | parathyroid hormone 1 receptor                                               | Cluster0067_Chondrocyte and osteoblast-related   |
| 1419383_at   | S100b         | S100 protein, beta polypeptide, neural                                       | Cluster0067_Chondrocyte and osteoblast-related   |
| 1417011_at   | Sdc2          | syndecan 2                                                                   | Cluster0067_Chondrocyte and osteoblast-related   |
| 1426082_a_at | Slc16a4       | solute carrier family 16 (monocarboxylic acid transporters), member 4        | Cluster0067_Chondrocyte and osteoblast-related   |
| 1425483_at   | Tox           | thymocyte selection-associated high mobility group box                       | Cluster0067_Chondrocyte and osteoblast-related   |
| 1437355_at   | Zcchc5        | zinc finger, CCHC domain containing 5                                        | Cluster0067_Chondrocyte and osteoblast-related   |
| 1456929_at   | BC042782      | cDNA sequence BC042782                                                       | Cluster0068_High in NIH3T3 embryonic fibroblasts |
| 1421006_at   | Col4a6        | collagen, type IV, alpha 6                                                   | Cluster0068_High in NIH3T3 embryonic fibroblasts |
| 1421007_at   | Col4a6        | collagen, type IV, alpha 6                                                   | Cluster0068_High in NIH3T3 embryonic fibroblasts |
| 1448326_a_at | Crabp1        | cellular retinoic acid binding protein I                                     | Cluster0068_High in NIH3T3 embryonic fibroblasts |
| 1449470_at   | Dlx1          | distal-less homeobox 1                                                       | Cluster0068_High in NIH3T3 embryonic fibroblasts |
| 1420779_at   | Fhl3          | four and a half LIM domains 3                                                | Cluster0068_High in NIH3T3 embryonic fibroblasts |
| 1438210_at   | Gpr149        | G protein-coupled receptor 149                                               | Cluster0068_High in NIH3T3 embryonic fibroblasts |
| 1456858_at   | Gpr149        | G protein-coupled receptor 149                                               | Cluster0068_High in NIH3T3 embryonic fibroblasts |
| 1438613_at   | Kcna4         | potassium voltage-gated channel, shaker-related subfamily, member 4          | Cluster0068_High in NIH3T3 embryonic fibroblasts |
| 1424425_a_at | Mtap          | methylthioadenosine phosphorylase                                            | Cluster0068_High in NIH3T3 embryonic fibroblasts |
| 1424426_at   | Mtap          | methylthioadenosine phosphorylase                                            | Cluster0068_High in NIH3T3 embryonic fibroblasts |
| 1451345_at   | Mtap          | methylthioadenosine phosphorylase                                            | Cluster0068_High in NIH3T3 embryonic fibroblasts |
| 1451346_at   | Mtap          | methylthioadenosine phosphorylase                                            | Cluster0068_High in NIH3T3 embryonic fibroblasts |
| 1425923_at   | Mycn          | v-myc myelocytomatosis viral related oncogene, neuroblastoma derived (avian) | Cluster0068_High in NIH3T3 embryonic fibroblasts |
| 1427797_s_at | NA            | ---                                                                          | Cluster0068_High in NIH3T3 embryonic fibroblasts |
| 1427798_x_at | NA            | ---                                                                          | Cluster0068_High in NIH3T3 embryonic fibroblasts |
| 1416158_at   | Nr2f2         | nuclear receptor subfamily 2, group F, member 2                              | Cluster0068_High in NIH3T3 embryonic fibroblasts |
| 1416159_at   | Nr2f2         | nuclear receptor subfamily 2, group F, member 2                              | Cluster0068_High in NIH3T3 embryonic fibroblasts |
| 1416160_at   | Nr2f2         | nuclear receptor subfamily 2, group F, member 2                              | Cluster0068_High in NIH3T3 embryonic fibroblasts |
| 1436475_at   | Nr2f2         | nuclear receptor subfamily 2, group F, member 2                              | Cluster0068_High in NIH3T3 embryonic fibroblasts |
| 1444229_at   | Nr2f2         | nuclear receptor subfamily 2, group F, member 2                              | Cluster0068_High in NIH3T3 embryonic fibroblasts |
| 1420349_at   | Ptgr          | prostaglandin F receptor                                                     | Cluster0068_High in NIH3T3 embryonic fibroblasts |
| 1446331_at   | Ptgr          | prostaglandin F receptor                                                     | Cluster0068_High in NIH3T3 embryonic fibroblasts |
| 1449828_at   | Ptgr          | prostaglandin F receptor                                                     | Cluster0068_High in NIH3T3 embryonic fibroblasts |
| 1453924_a_at | Ptgr          | prostaglandin F receptor                                                     | Cluster0068_High in NIH3T3 embryonic fibroblasts |
| 1430310_at   | Tspan11       | tetraspanin 11                                                               | Cluster0068_High in NIH3T3 embryonic fibroblasts |
| 1436626_at   | Tspan11       | tetraspanin 11                                                               | Cluster0068_High in NIH3T3 embryonic fibroblasts |
| 1441776_at   | Tspan11       | tetraspanin 11                                                               | Cluster0068_High in NIH3T3 embryonic fibroblasts |
| 1422368_at   | Vmn1r43       | vomer nasal 1 receptor 43                                                    | Cluster0068_High in NIH3T3 embryonic fibroblasts |
| 1429135_at   | 1110059M19Rik | RIKEN cDNA 1110059M19 gene                                                   | Cluster0069_Osteoblast-related                   |
| 1442077_at   | 2310076G05Rik | RIKEN cDNA 2310076G05 gene                                                   | Cluster0069_Osteoblast-related                   |





|              |                        |                                                                                                             |                                                   |
|--------------|------------------------|-------------------------------------------------------------------------------------------------------------|---------------------------------------------------|
| 1454242_at   | 2310079G19Rik          | RIKEN cDNA 2310079G19 gene                                                                                  | Cluster0071_High in caecum                        |
| 1450633_at   | Calm4                  | calmodulin 4                                                                                                | Cluster0071_High in caecum                        |
| 1429540_at   | Cnfn                   | cornifelin                                                                                                  | Cluster0071_High in caecum                        |
| 1435760_at   | Csta                   | cystatin A                                                                                                  | Cluster0071_High in caecum                        |
| 1427268_at   | Flg                    | filaggrin                                                                                                   | Cluster0071_High in caecum                        |
| 1458367_at   | Gm94                   | predicted gene 94                                                                                           | Cluster0071_High in caecum                        |
| 1422481_at   | Krt1                   | keratin 1                                                                                                   | Cluster0071_High in caecum                        |
| 1452166_a_at | Krt10                  | keratin 10                                                                                                  | Cluster0071_High in caecum                        |
| 1422454_at   | Krt13                  | keratin 13                                                                                                  | Cluster0071_High in caecum                        |
| 1423935_x_at | Krt14                  | keratin 14                                                                                                  | Cluster0071_High in caecum                        |
| 1460347_at   | Krt14                  | keratin 14                                                                                                  | Cluster0071_High in caecum                        |
| 1418735_at   | Krt4                   | keratin 4                                                                                                   | Cluster0071_High in caecum                        |
| 1438394_x_at | Krt4                   | keratin 4                                                                                                   | Cluster0071_High in caecum                        |
| 1424096_at   | Krt5                   | keratin 5                                                                                                   | Cluster0071_High in caecum                        |
| 1422783_a_at | Krt6a                  | keratin 6A                                                                                                  | Cluster0071_High in caecum                        |
| 1422784_at   | Krt6a                  | keratin 6A                                                                                                  | Cluster0071_High in caecum                        |
| 1427700_x_at | Krt6a                  | keratin 6A                                                                                                  | Cluster0071_High in caecum                        |
| 1422588_at   | Krt6b                  | keratin 6B                                                                                                  | Cluster0071_High in caecum                        |
| 1434227_at   | Krtdap                 | keratinocyte differentiation associated protein                                                             | Cluster0071_High in caecum                        |
| 1456248_at   | Lce3f /// LOC630971    | late cornified envelope 3F /// hypothetical protein LOC630971                                               | Cluster0071_High in caecum                        |
| 1422308_a_at | Lgals7                 | lectin, galactose binding, soluble 7                                                                        | Cluster0071_High in caecum                        |
| 1450645_at   | Mt4                    | metallothionein 4                                                                                           | Cluster0071_High in caecum                        |
| 1456539_at   | NA                     | ---                                                                                                         | Cluster0071_High in caecum                        |
| 1420431_at   | Rptn                   | repetin                                                                                                     | Cluster0071_High in caecum                        |
| 1422939_at   | Serpib3b /// Serpinb3c | serine (or cysteine) peptidase inhibitor, clade B (ovalbumin), member 3B /// serine (or cysteine) peptidase | Cluster0071_High in caecum                        |
| 1422940_x_at | Serpib3b /// Serpinb3c | serine (or cysteine) peptidase inhibitor, clade B (ovalbumin), member 3B /// serine (or cysteine) peptidase | Cluster0071_High in caecum                        |
| 1422401_at   | Spr3                   | small proline-rich protein 3                                                                                | Cluster0071_High in caecum                        |
| 1455848_at   | Tmprss11a              | transmembrane protease, serine 11a                                                                          | Cluster0071_High in caecum                        |
| 1437013_x_at | Atp6v0b                | ATPase, H+ transporting, lysosomal V0 subunit B                                                             | Cluster0072_Phagocyte-related/ antigen processing |
| 1435732_x_at | Atp6v0c                | ATPase, H+ transporting, lysosomal V0 subunit C                                                             | Cluster0072_Phagocyte-related/ antigen processing |
| 1438925_x_at | Atp6v0c                | ATPase, H+ transporting, lysosomal V0 subunit C                                                             | Cluster0072_Phagocyte-related/ antigen processing |
| 1422506_a_at | Cstb                   | cystatin B                                                                                                  | Cluster0072_Phagocyte-related/ antigen processing |
| 1427658_at   | Ctbs                   | chitinase, di-N-acetyl-                                                                                     | Cluster0072_Phagocyte-related/ antigen processing |
| 1452504_s_at | Ctbs                   | chitinase, di-N-acetyl-                                                                                     | Cluster0072_Phagocyte-related/ antigen processing |
| 1448128_at   | Ctsa                   | cathepsin A                                                                                                 | Cluster0072_Phagocyte-related/ antigen processing |
| 1417490_at   | Ctsb                   | cathepsin B                                                                                                 | Cluster0072_Phagocyte-related/ antigen processing |
| 1417492_at   | Ctsb                   | cathepsin B                                                                                                 | Cluster0072_Phagocyte-related/ antigen processing |
| 1448732_at   | Ctsb                   | cathepsin B                                                                                                 | Cluster0072_Phagocyte-related/ antigen processing |
| 1448118_a_at | Ctsd                   | cathepsin D                                                                                                 | Cluster0072_Phagocyte-related/ antigen processing |
| 1417868_a_at | Ctsz                   | cathepsin Z                                                                                                 | Cluster0072_Phagocyte-related/ antigen processing |
| 1417870_x_at | Ctsz                   | cathepsin Z                                                                                                 | Cluster0072_Phagocyte-related/ antigen processing |
| 1450099_a_at | Gba                    | glucosidase, beta, acid                                                                                     | Cluster0072_Phagocyte-related/ antigen processing |
| 1448148_at   | Grn                    | granulin                                                                                                    | Cluster0072_Phagocyte-related/ antigen processing |
| 1449024_a_at | Hexa                   | hexosaminidase A                                                                                            | Cluster0072_Phagocyte-related/ antigen processing |
| 1448883_at   | Lgmn                   | legumain                                                                                                    | Cluster0072_Phagocyte-related/ antigen processing |
| 1449874_at   | Ly96                   | lymphocyte antigen 96                                                                                       | Cluster0072_Phagocyte-related/ antigen processing |
| 1427076_at   | Mpeg1                  | macrophage expressed gene 1                                                                                 | Cluster0072_Phagocyte-related/ antigen processing |
| 1423425_at   | Plbd2                  | phospholipase B domain containing 2                                                                         | Cluster0072_Phagocyte-related/ antigen processing |
| 1448318_at   | Plin2                  | perilipin 2                                                                                                 | Cluster0072_Phagocyte-related/ antigen processing |
| 1415687_a_at | Psap                   | prosaposin                                                                                                  | Cluster0072_Phagocyte-related/ antigen processing |
| 1415734_at   | Rab7                   | RAB7, member RAS oncogene family                                                                            | Cluster0072_Phagocyte-related/ antigen processing |
| 1436482_a_at | Sdc3                   | syndecan 3                                                                                                  | Cluster0072_Phagocyte-related/ antigen processing |
| 1450027_at   | Sdc3                   | syndecan 3                                                                                                  | Cluster0072_Phagocyte-related/ antigen processing |
| 1423332_at   | Sdcbp                  | syndecan binding protein                                                                                    | Cluster0072_Phagocyte-related/ antigen processing |
| 1420361_at   | Slc11a1                | solute carrier family 11 (proton-coupled divalent metal ion transporters), member 1                         | Cluster0072_Phagocyte-related/ antigen processing |
| 1424603_at   | Sumf1                  | sulfatase modifying factor 1                                                                                | Cluster0072_Phagocyte-related/ antigen processing |
| 1453841_at   | 2310050P20Rik          | RIKEN cDNA 2310050P20 gene                                                                                  | Cluster0073_High in B and T cells                 |

|              |                                |                                                                                                          |                                          |
|--------------|--------------------------------|----------------------------------------------------------------------------------------------------------|------------------------------------------|
| 1430622_at   | 4833423F13Rik                  | RIKEN cDNA 4833423F13 gene                                                                               | Cluster0073_High in B and T cells        |
| 1453395_at   | 5330403D14Rik                  | RIKEN cDNA 5330403D14 gene                                                                               | Cluster0073_High in B and T cells        |
| 1441977_at   | 9630023C09Rik                  | RIKEN cDNA 9630023C09 gene                                                                               | Cluster0073_High in B and T cells        |
| 1440214_at   | A630001G21Rik                  | RIKEN cDNA A630001G21 gene                                                                               | Cluster0073_High in B and T cells        |
| 1430131_at   | Cr1l                           | complement component (3b/4b) receptor 1-like                                                             | Cluster0073_High in B and T cells        |
| 1443084_at   | Ctso                           | cathepsin O                                                                                              | Cluster0073_High in B and T cells        |
| 1425822_a_at | Dtx1                           | deltex 1 homolog (Drosophila)                                                                            | Cluster0073_High in B and T cells        |
| 1438802_at   | Foxp1                          | Forkhead box P1                                                                                          | Cluster0073_High in B and T cells        |
| 1439926_at   | Heg1                           | HEG homolog 1 (zebrafish)                                                                                | Cluster0073_High in B and T cells        |
| 1438519_at   | Klhl24                         | kelch-like 24 (Drosophila)                                                                               | Cluster0073_High in B and T cells        |
| 1439097_at   | NA                             | ---                                                                                                      | Cluster0073_High in B and T cells        |
| 1441172_at   | NA                             | ---                                                                                                      | Cluster0073_High in B and T cells        |
| 1441472_at   | NA                             | ---                                                                                                      | Cluster0073_High in B and T cells        |
| 1441794_at   | NA                             | ---                                                                                                      | Cluster0073_High in B and T cells        |
| 1442411_at   | NA                             | ---                                                                                                      | Cluster0073_High in B and T cells        |
| 1444676_at   | NA                             | ---                                                                                                      | Cluster0073_High in B and T cells        |
| 1444917_at   | NA                             | ---                                                                                                      | Cluster0073_High in B and T cells        |
| 1446280_at   | NA                             | ---                                                                                                      | Cluster0073_High in B and T cells        |
| 1446739_at   | NA                             | ---                                                                                                      | Cluster0073_High in B and T cells        |
| 1447092_at   | NA                             | ---                                                                                                      | Cluster0073_High in B and T cells        |
| 1447209_at   | NA                             | ---                                                                                                      | Cluster0073_High in B and T cells        |
| 1452402_at   | NA                             | ---                                                                                                      | Cluster0073_High in B and T cells        |
| 1456851_at   | NA                             | ---                                                                                                      | Cluster0073_High in B and T cells        |
| 1422272_at   | Phxr4                          | per-hexamer repeat gene 4                                                                                | Cluster0073_High in B and T cells        |
| 1441414_at   | Sfi1                           | Sfi1 homolog, spindle assembly associated (yeast)                                                        | Cluster0073_High in B and T cells        |
| 1438580_at   | Zcchc7                         | zinc finger, CCHC domain containing 7                                                                    | Cluster0073_High in B and T cells        |
| 1439033_at   | Zcchc7                         | zinc finger, CCHC domain containing 7                                                                    | Cluster0073_High in B and T cells        |
| 1417802_at   | 1110032A04Rik                  | RIKEN cDNA 1110032A04 gene                                                                               | Cluster0074_Large intestine-related      |
| 1417803_at   | 1110032A04Rik                  | RIKEN cDNA 1110032A04 gene                                                                               | Cluster0074_Large intestine-related      |
| 1424439_at   | 1810065E05Rik                  | RIKEN cDNA 1810065E05 gene                                                                               | Cluster0074_Large intestine-related      |
| 1431427_at   | 5430427M07Rik                  | RIKEN cDNA 5430427M07 gene                                                                               | Cluster0074_Large intestine-related      |
| 1435036_at   | Aspg                           | asparaginase homolog (S. cerevisiae)                                                                     | Cluster0074_Large intestine-related      |
| 1445025_at   | AU015536                       | expressed sequence AU015536                                                                              | Cluster0074_Large intestine-related      |
| 1436539_at   | Clmn                           | calmin                                                                                                   | Cluster0074_Large intestine-related      |
| 1440576_at   | Cpn1                           | carboxypeptidase N, polypeptide 1                                                                        | Cluster0074_Large intestine-related      |
| 1419582_at   | Cyp2c55                        | cytochrome P450, family 2, subfamily c, polypeptide 55                                                   | Cluster0074_Large intestine-related      |
| 1419349_a_at | Cyp2d9                         | cytochrome P450, family 2, subfamily d, polypeptide 9                                                    | Cluster0074_Large intestine-related      |
| 1429310_at   | Flrt3                          | fibronectin leucine rich transmembrane protein 3                                                         | Cluster0074_Large intestine-related      |
| 1424901_at   | Gcnt3                          | glucosaminyl (N-acetyl) transferase 3, mucin type                                                        | Cluster0074_Large intestine-related      |
| 1430963_at   | Gcnt3                          | glucosaminyl (N-acetyl) transferase 3, mucin type                                                        | Cluster0074_Large intestine-related      |
| 1440409_at   | Gcnt3                          | glucosaminyl (N-acetyl) transferase 3, mucin type                                                        | Cluster0074_Large intestine-related      |
| 1437258_at   | Gm4162 /// Sprr2a1 /// Sprr2a2 | predicted gene 4162 /// small proline-rich protein 2A1 /// small proline-rich protein 2A2                | Cluster0074_Large intestine-related      |
| 1431833_a_at | Hmgcs2                         | 3-hydroxy-3-methylglutaryl-Coenzyme A synthase 2                                                         | Cluster0074_Large intestine-related      |
| 1425127_at   | Hsd3b2                         | hydroxy-delta-5-steroid dehydrogenase, 3 beta- and steroid delta-isomerase 2                             | Cluster0074_Large intestine-related      |
| 1460232_s_at | Hsd3b2 /// Hsd3b3 /// Hsd3b6   | hydroxy-delta-5-steroid dehydrogenase, 3 beta- and steroid delta-isomerase 2 /// hydroxy-delta-5-steroid | Cluster0074_Large intestine-related      |
| 1427377_x_at | Hsd3b3                         | hydroxy-delta-5-steroid dehydrogenase, 3 beta- and steroid delta-isomerase 3                             | Cluster0074_Large intestine-related      |
| 1431916_at   | Hsd3b3                         | hydroxy-delta-5-steroid dehydrogenase, 3 beta- and steroid delta-isomerase 3                             | Cluster0074_Large intestine-related      |
| 1416980_at   | Mettl7b                        | methyltransferase like 7B                                                                                | Cluster0074_Large intestine-related      |
| 1451183_at   | Myo19                          | myosin XIX                                                                                               | Cluster0074_Large intestine-related      |
| 1438310_at   | NA                             | ---                                                                                                      | Cluster0074_Large intestine-related      |
| 1444495_at   | NA                             | ---                                                                                                      | Cluster0074_Large intestine-related      |
| 1438856_x_at | Serpinb5                       | serine (or cysteine) peptidase inhibitor, clade B, member 5                                              | Cluster0074_Large intestine-related      |
| 1441941_x_at | Serpinb5                       | serine (or cysteine) peptidase inhibitor, clade B, member 5                                              | Cluster0074_Large intestine-related      |
| 1418739_at   | Sgk2                           | serum/glucocorticoid regulated kinase 2                                                                  | Cluster0074_Large intestine-related      |
| 1428909_at   | A130040M12Rik                  | RIKEN cDNA A130040M12 gene                                                                               | Cluster0075_High in haematopoietic cells |
| 1426249_at   | Adrbk1                         | adrenergic receptor kinase, beta 1                                                                       | Cluster0075_High in haematopoietic cells |
| 1452393_at   | Akna                           | AT-hook transcription factor                                                                             | Cluster0075_High in haematopoietic cells |

|              |                         |                                                                                  |                                         |
|--------------|-------------------------|----------------------------------------------------------------------------------|-----------------------------------------|
| 1421164_a_at | Arhgef1                 | Rho guanine nucleotide exchange factor (GEF) 1                                   | Cluster0075_High inhaematopoietic cells |
| 1444650_at   | Arhgef18                | rho/rac guanine nucleotide exchange factor (GEF) 18                              | Cluster0075_High inhaematopoietic cells |
| 1437667_a_at | Bach2                   | BTB and CNC homology 2                                                           | Cluster0075_High inhaematopoietic cells |
| 1423518_at   | Csk                     | c-src tyrosine kinase                                                            | Cluster0075_High inhaematopoietic cells |
| 1422027_a_at | Ets1                    | E26 avian leukemia oncogene 1, 5 domain                                          | Cluster0075_High inhaematopoietic cells |
| 1458202_at   | Fam65b                  | family with sequence similarity 65, member B                                     | Cluster0075_High inhaematopoietic cells |
| 1416981_at   | Foxo1                   | forkhead box O1                                                                  | Cluster0075_High inhaematopoietic cells |
| 1427891_at   | Gimap6                  | GTPase, IMAP family member 6                                                     | Cluster0075_High inhaematopoietic cells |
| 1439141_at   | Gpr18                   | G protein-coupled receptor 18                                                    | Cluster0075_High inhaematopoietic cells |
| 1451672_at   | Grk6                    | G protein-coupled receptor kinase 6                                              | Cluster0075_High inhaematopoietic cells |
| 1429104_at   | Limd2                   | LIM domain containing 2                                                          | Cluster0075_High inhaematopoietic cells |
| 1460738_at   | Limd2                   | LIM domain containing 2                                                          | Cluster0075_High inhaematopoietic cells |
| 1419135_at   | Ltb                     | lymphotoxin B                                                                    | Cluster0075_High inhaematopoietic cells |
| 1428848_a_at | Macf1                   | microtubule-actin crosslinking factor 1                                          | Cluster0075_High inhaematopoietic cells |
| 1445141_at   | NA                      | ---                                                                              | Cluster0075_High inhaematopoietic cells |
| 1420743_a_at | Ppp3cc                  | protein phosphatase 3, catalytic subunit, gamma isoform                          | Cluster0075_High inhaematopoietic cells |
| 1456870_at   | Rasal3                  | RAS protein activator like 3                                                     | Cluster0075_High inhaematopoietic cells |
| 1431749_a_at | Rasgrp1                 | RAS guanyl releasing protein 1                                                   | Cluster0075_High inhaematopoietic cells |
| 1442866_at   | Rcsd1                   | RCS domain containing 1                                                          | Cluster0075_High inhaematopoietic cells |
| 1425086_a_at | Slamf6                  | SLAM family member 6                                                             | Cluster0075_High inhaematopoietic cells |
| 1430165_at   | Stk17b                  | serine/threonine kinase 17b (apoptosis-inducing)                                 | Cluster0075_High inhaematopoietic cells |
| 1454850_at   | Tbc1d10c                | TBC1 domain family, member 10c                                                   | Cluster0075_High inhaematopoietic cells |
| 1421863_at   | Vamp1                   | vesicle-associated membrane protein 1                                            | Cluster0075_High inhaematopoietic cells |
| 1455518_at   | Zdhhc18                 | zinc finger, DHHC domain containing 18                                           | Cluster0075_High inhaematopoietic cells |
| 1437715_x_at | Apex1                   | apurinic/aprimidinic endonuclease 1                                              | Cluster0076_House keeping-cell cycle    |
| 1456079_x_at | Apex1                   | apurinic/aprimidinic endonuclease 1                                              | Cluster0076_House keeping-cell cycle    |
| 1434365_a_at | BC055324                | cDNA sequence BC055324                                                           | Cluster0076_House keeping-cell cycle    |
| 1451541_at   | Bcs1l                   | BCS1-like (yeast)                                                                | Cluster0076_House keeping-cell cycle    |
| 1419076_a_at | Brca2                   | breast cancer 2                                                                  | Cluster0076_House keeping-cell cycle    |
| 1417019_a_at | Cdc6                    | cell division cycle 6 homolog (S. cerevisiae)                                    | Cluster0076_House keeping-cell cycle    |
| 1416802_a_at | Cdca5                   | cell division cycle associated 5                                                 | Cluster0076_House keeping-cell cycle    |
| 1452912_at   | Dscc1                   | defective in sister chromatid cohesion 1 homolog (S. cerevisiae)                 | Cluster0076_House keeping-cell cycle    |
| 1416544_at   | Ezh2                    | enhancer of zeste homolog 2 (Drosophila)                                         | Cluster0076_House keeping-cell cycle    |
| 1424136_a_at | LOC433064 /// Ppih      | similar to peptidyl prolyl isomerase H /// peptidyl prolyl isomerase H           | Cluster0076_House keeping-cell cycle    |
| 1428144_at   | Lrwd1                   | leucine-rich repeats and WD repeat domain containing 1                           | Cluster0076_House keeping-cell cycle    |
| 1433408_a_at | Mcm10                   | minichromosome maintenance deficient 10 (S. cerevisiae)                          | Cluster0076_House keeping-cell cycle    |
| 1434079_s_at | Mcm2                    | minichromosome maintenance deficient 2 mitotin (S. cerevisiae)                   | Cluster0076_House keeping-cell cycle    |
| 1436708_x_at | Mcm4                    | minichromosome maintenance deficient 4 homolog (S. cerevisiae)                   | Cluster0076_House keeping-cell cycle    |
| 1436808_x_at | Mcm5                    | minichromosome maintenance deficient 5, cell division cycle 46 (S. cerevisiae)   | Cluster0076_House keeping-cell cycle    |
| 1438852_x_at | Mcm6                    | minichromosome maintenance deficient 6 (MIS5 homolog, S. pombe) (S. cerevisiae)  | Cluster0076_House keeping-cell cycle    |
| 1439269_x_at | Mcm7                    | minichromosome maintenance deficient 7 (S. cerevisiae)                           | Cluster0076_House keeping-cell cycle    |
| 1420142_s_at | Pa2g4                   | proliferation-associated 2G4                                                     | Cluster0076_House keeping-cell cycle    |
| 1427094_at   | Pole2                   | polymerase (DNA directed), epsilon 2 (p59 subunit)                               | Cluster0076_House keeping-cell cycle    |
| 1442058_s_at | Psmc3ip                 | proteasome (prosome, macropain) 26S subunit, ATPase 3, interacting protein       | Cluster0076_House keeping-cell cycle    |
| 1416151_at   | Sfrs3                   | splicing factor, arginine/serine-rich 3 (SRp20)                                  | Cluster0076_House keeping-cell cycle    |
| 1454993_a_at | Sfrs3                   | splicing factor, arginine/serine-rich 3 (SRp20)                                  | Cluster0076_House keeping-cell cycle    |
| 1423971_at   | Thoc3                   | THO complex 3                                                                    | Cluster0076_House keeping-cell cycle    |
| 1417586_at   | Timeless                | timeless homolog (Drosophila)                                                    | Cluster0076_House keeping-cell cycle    |
| 1429295_s_at | Trip13                  | thyroid hormone receptor interactor 13                                           | Cluster0076_House keeping-cell cycle    |
| 1425753_a_at | Ung                     | uracil DNA glycosylase                                                           | Cluster0076_House keeping-cell cycle    |
| 1435114_at   | Wdhd1                   | WD repeat and HMG-box DNA binding protein 1                                      | Cluster0076_House keeping-cell cycle    |
| 1440381_at   | 2410085M17Rik /// Riok2 | RIKEN cDNA 2410085M17 gene /// RIO kinase 2 (yeast)                              | Cluster0077_House keeping-nucleus       |
| 1452830_s_at | Cad                     | carbamoyl-phosphate synthetase 2, aspartate transcarbamylase, and dihydroorotase | Cluster0077_House keeping-nucleus       |
| 1416616_s_at | Clpp                    | caseinolytic peptidase, ATP-dependent, proteolytic subunit homolog (E. coli)     | Cluster0077_House keeping-nucleus       |
| 1417657_s_at | Dnajc2                  | DnaJ (Hsp40) homolog, subfamily C, member 2                                      | Cluster0077_House keeping-nucleus       |
| 1419680_a_at | Elac2                   | elaC homolog 2 (E. coli)                                                         | Cluster0077_House keeping-nucleus       |
| 1452266_at   | Las1l                   | LAS1-like (S. cerevisiae)                                                        | Cluster0077_House keeping-nucleus       |

|              |                                |                                                                                                            |                                                  |
|--------------|--------------------------------|------------------------------------------------------------------------------------------------------------|--------------------------------------------------|
| 1426631_at   | LOC100047009 /// Pus7          | hypothetical protein LOC100047009 /// pseudouridylyl synthase 7 homolog ( <i>S. cerevisiae</i> ;           | Cluster0077_House keeping-nucleus                |
| 1417511_at   | Lyar                           | Ly1 antibody reactive clone                                                                                | Cluster0077_House keeping-nucleus                |
| 1428869_at   | Nolc1                          | nucleolar and coiled-body phosphoprotein 1                                                                 | Cluster0077_House keeping-nucleus                |
| 1455035_s_at | Nop56                          | NOP56 ribonucleoprotein homolog (yeast)                                                                    | Cluster0077_House keeping-nucleus                |
| 1434289_at   | Nsun5                          | NOL1/NOP2/Sun domain family, member 5                                                                      | Cluster0077_House keeping-nucleus                |
| 1428458_at   | Pop1                           | processing of precursor 1, ribonuclease P/MRP family, ( <i>S. cerevisiae</i> )                             | Cluster0077_House keeping-nucleus                |
| 1423703_at   | Ppan                           | peter pan homolog ( <i>Drosophila</i> )                                                                    | Cluster0077_House keeping-nucleus                |
| 1448740_at   | Rangrf                         | RAN guanine nucleotide release factor                                                                      | Cluster0077_House keeping-nucleus                |
| 1422922_at   | Recq14                         | RecQ protein-like 4                                                                                        | Cluster0077_House keeping-nucleus                |
| 1424792_at   | Rpp40                          | ribonuclease P 40 subunit (human)                                                                          | Cluster0077_House keeping-nucleus                |
| 1443750_s_at | Rpp40                          | ribonuclease P 40 subunit (human)                                                                          | Cluster0077_House keeping-nucleus                |
| 1434239_at   | Rrp12                          | ribosomal RNA processing 12 homolog ( <i>S. cerevisiae</i> )                                               | Cluster0077_House keeping-nucleus                |
| 1452118_at   | Rrp1b                          | ribosomal RNA processing 1 homolog B ( <i>S. cerevisiae</i> )                                              | Cluster0077_House keeping-nucleus                |
| 1417725_a_at | Sscca1                         | Sjogren s syndrome/scleroderma autoantigen 1 homolog (human)                                               | Cluster0077_House keeping-nucleus                |
| 1416345_at   | Timm8a1                        | translocase of inner mitochondrial membrane 8 homolog a1 (yeast)                                           | Cluster0077_House keeping-nucleus                |
| 1448101_s_at | Trim27                         | tripartite motif-containing 27                                                                             | Cluster0077_House keeping-nucleus                |
| 1435118_at   | Tsen2                          | tRNA splicing endonuclease 2 homolog ( <i>S. cerevisiae</i> )                                              | Cluster0077_House keeping-nucleus                |
| 1460209_at   | Usp39                          | ubiquitin specific peptidase 39                                                                            | Cluster0077_House keeping-nucleus                |
| 1428390_at   | Wdr43                          | WD repeat domain 43                                                                                        | Cluster0077_House keeping-nucleus                |
| 1422709_a_at | Wdr46                          | WD repeat domain 46                                                                                        | Cluster0077_House keeping-nucleus                |
| 1437828_s_at | Wdr46                          | WD repeat domain 46                                                                                        | Cluster0077_House keeping-nucleus                |
| 1432280_at   | 2310007L24Rik                  | RIKEN cDNA 2310007L24 gene                                                                                 | Cluster0078_Lymphoid tissue inducer cell-related |
| 1444091_a_at | 6430571L13Rik                  | RIKEN cDNA 6430571L13 gene                                                                                 | Cluster0078_Lymphoid tissue inducer cell-related |
| 1458456_x_at | 6430571L13Rik                  | RIKEN cDNA 6430571L13 gene                                                                                 | Cluster0078_Lymphoid tissue inducer cell-related |
| 1425078_x_at | C130026I21Rik /// LOC100041885 | RIKEN cDNA C130026I21 gene /// similar to C130026I21Rik protein                                            | Cluster0078_Lymphoid tissue inducer cell-related |
| 1421420_at   | Ccr10                          | chemokine (C-C motif) receptor 10                                                                          | Cluster0078_Lymphoid tissue inducer cell-related |
| 1420066_s_at | Cd160                          | CD160 antigen                                                                                              | Cluster0078_Lymphoid tissue inducer cell-related |
| 1420396_at   | Cd160                          | CD160 antigen                                                                                              | Cluster0078_Lymphoid tissue inducer cell-related |
| 1440200_at   | Fam184b                        | family with sequence similarity 184, member B                                                              | Cluster0078_Lymphoid tissue inducer cell-related |
| 1455279_at   | Gm1060                         | predicted gene 1060                                                                                        | Cluster0078_Lymphoid tissue inducer cell-related |
| 1421256_at   | Gzmc                           | granzyme C                                                                                                 | Cluster0078_Lymphoid tissue inducer cell-related |
| 1426566_s_at | Il17re                         | interleukin 17 receptor E                                                                                  | Cluster0078_Lymphoid tissue inducer cell-related |
| 1439357_at   | Il17re                         | interleukin 17 receptor E                                                                                  | Cluster0078_Lymphoid tissue inducer cell-related |
| 1427624_s_at | Il22 /// Iltifb                | interleukin 22 /// interleukin 10-related T cell-derived inducible factor bet2                             | Cluster0078_Lymphoid tissue inducer cell-related |
| 1420421_s_at | Klrb1b                         | killer cell lectin-like receptor subfamily B member 1B                                                     | Cluster0078_Lymphoid tissue inducer cell-related |
| 1422065_at   | Klrb1b                         | killer cell lectin-like receptor subfamily B member 1B                                                     | Cluster0078_Lymphoid tissue inducer cell-related |
| 1422066_x_at | Klrb1b                         | killer cell lectin-like receptor subfamily B member 1B                                                     | Cluster0078_Lymphoid tissue inducer cell-related |
| 1422067_at   | Klrb1b                         | killer cell lectin-like receptor subfamily B member 1B                                                     | Cluster0078_Lymphoid tissue inducer cell-related |
| 1445399_at   | Klrb1b                         | killer cell lectin-like receptor subfamily B member 1B                                                     | Cluster0078_Lymphoid tissue inducer cell-related |
| 1416676_at   | Kng1                           | kininogen 1                                                                                                | Cluster0078_Lymphoid tissue inducer cell-related |
| 1426045_at   | Kng1                           | kininogen 1                                                                                                | Cluster0078_Lymphoid tissue inducer cell-related |
| 1420353_at   | Lta                            | lymphotoxin A                                                                                              | Cluster0078_Lymphoid tissue inducer cell-related |
| 1459057_at   | NA                             | ---                                                                                                        | Cluster0078_Lymphoid tissue inducer cell-related |
| 1440531_at   | Rbm11                          | RNA binding motif protein 11                                                                               | Cluster0078_Lymphoid tissue inducer cell-related |
| 1420786_a_at | Rbmy1a1                        | RNA binding motif protein, Y chromosome, family 1, member A1                                               | Cluster0078_Lymphoid tissue inducer cell-related |
| 1418422_at   | Serpinh9g                      | serine (or cysteine) peptidase inhibitor, clade B, member 9g                                               | Cluster0078_Lymphoid tissue inducer cell-related |
| 1419412_at   | Xcl1                           | chemokine (C motif) ligand 1                                                                               | Cluster0078_Lymphoid tissue inducer cell-related |
| 1436934_s_at | Aco2                           | aconitase 2, mitochondrial                                                                                 | Cluster0079_House keeping-mitochondrion          |
| 1451002_at   | Aco2                           | aconitase 2, mitochondrial                                                                                 | Cluster0079_House keeping-mitochondrion          |
| 1427206_at   | Afg3l2 /// LOC100048880        | AFG3(ATPase family gene 3)-like 2 (yeast) /// similar to AFG3(ATPase family gene 3)-like 2 (yeast)         | Cluster0079_House keeping-mitochondrion          |
| 1427207_s_at | Afg3l2 /// LOC100048880        | AFG3(ATPase family gene 3)-like 2 (yeast) /// similar to AFG3(ATPase family gene 3)-like 2 (yeast)         | Cluster0079_House keeping-mitochondrion          |
| 1454661_at   | Atp5g3                         | ATP synthase, H+ transporting, mitochondrial F0 complex, subunit C3 (subunit 9)                            | Cluster0079_House keeping-mitochondrion          |
| 1422578_at   | Cs                             | citrate synthase                                                                                           | Cluster0079_House keeping-mitochondrion          |
| 1460189_at   | Dcaf11                         | DDB1 and CUL4 associated factor 11                                                                         | Cluster0079_House keeping-mitochondrion          |
| 1429773_at   | Dnajc22                        | DnaJ (Hsp40) homolog, subfamily C, member 22                                                               | Cluster0079_House keeping-mitochondrion          |
| 1423972_at   | Etfa                           | electron transferring flavoprotein, alpha polypeptide                                                      | Cluster0079_House keeping-mitochondrion          |
| 1438545_at   | Gm5529 /// Slc25a5             | predicted pseudogene 5529 /// solute carrier family 25 (mitochondrial carrier, adenine nucleotide transloc | Cluster0079_House keeping-mitochondrion          |

|              |                                |                                                                                                                           |                                         |
|--------------|--------------------------------|---------------------------------------------------------------------------------------------------------------------------|-----------------------------------------|
| 1438546_x_at | Gm5529 /// Slc25a5             | predicted pseudogene 5529 /// solute carrier family 25 (mitochondrial carrier, adenine nucleotide translocator), member 5 | Cluster0079_House keeping-mitochondrion |
| 1426522_at   | Hadhb                          | hydroxyacyl-Coenzyme A dehydrogenase/3-ketoacyl-Coenzyme A thiolase/enoyl-Coenzyme A hydratase (trimeric)                 | Cluster0079_House keeping-mitochondrion |
| 1451096_at   | Ndufs2                         | NADH dehydrogenase (ubiquinone) Fe-S protein 2                                                                            | Cluster0079_House keeping-mitochondrion |
| 1415967_at   | Ndufv1                         | NADH dehydrogenase (ubiquinone) flavoprotein 1                                                                            | Cluster0079_House keeping-mitochondrion |
| 1426688_at   | Sdha                           | succinate dehydrogenase complex, subunit A, flavoprotein (Fp)                                                             | Cluster0079_House keeping-mitochondrion |
| 1418005_at   | Sdhb                           | succinate dehydrogenase complex, subunit B, iron sulfur (lp)                                                              | Cluster0079_House keeping-mitochondrion |
| 1428235_at   | Sdhd                           | succinate dehydrogenase complex, subunit D, integral membrane protein                                                     | Cluster0079_House keeping-mitochondrion |
| 1423772_x_at | Slc25a5                        | solute carrier family 25 (mitochondrial carrier, adenine nucleotide translocator), member 5                               | Cluster0079_House keeping-mitochondrion |
| 1430542_a_at | Slc25a5                        | solute carrier family 25 (mitochondrial carrier, adenine nucleotide translocator), member 5                               | Cluster0079_House keeping-mitochondrion |
| 1434801_x_at | Slc25a5                        | solute carrier family 25 (mitochondrial carrier, adenine nucleotide translocator), member 5                               | Cluster0079_House keeping-mitochondrion |
| 1436874_x_at | Slc25a5                        | solute carrier family 25 (mitochondrial carrier, adenine nucleotide translocator), member 5                               | Cluster0079_House keeping-mitochondrion |
| 1450748_at   | Smpd3                          | sphingomyelin phosphodiesterase 3, neutral                                                                                | Cluster0079_House keeping-mitochondrion |
| 1415891_at   | Suclg1                         | succinate-CoA ligase, GDP-forming, alpha subunit                                                                          | Cluster0079_House keeping-mitochondrion |
| 1416119_at   | Txn1                           | thioredoxin 1                                                                                                             | Cluster0079_House keeping-mitochondrion |
| 1428631_a_at | Uqcrc2                         | ubiquinol cytochrome c reductase core protein 2                                                                           | Cluster0079_House keeping-mitochondrion |
| 1450968_at   | Uqcrcf1                        | ubiquinol-cytochrome c reductase, Rieske iron-sulfur polypeptide 1                                                        | Cluster0079_House keeping-mitochondrion |
| 1457643_x_at | 2610316D01Rik                  | RIKEN cDNA 2610316D01 gene                                                                                                | Cluster0080_Paneth cell-related         |
| 1433388_at   | 2900022M07Rik                  | RIKEN cDNA 2900022M07 gene                                                                                                | Cluster0080_Paneth cell-related         |
| 1441867_x_at | 4930534B04Rik                  | RIKEN cDNA 4930534B04 gene                                                                                                | Cluster0080_Paneth cell-related         |
| 1447089_at   | Arl1                           | ADP-ribosylation factor-like 1                                                                                            | Cluster0080_Paneth cell-related         |
| 1437367_at   | Bat1a                          | HLA-B-associated transcript 1A                                                                                            | Cluster0080_Paneth cell-related         |
| 1418913_at   | Bhmt2                          | betaine-homocysteine methyltransferase 2                                                                                  | Cluster0080_Paneth cell-related         |
| 1425754_a_at | Btn1a1                         | butyrophilin, subfamily 1, member A1                                                                                      | Cluster0080_Paneth cell-related         |
| 1422421_at   | Defa-rs12                      | defensin, alpha, related sequence 12                                                                                      | Cluster0080_Paneth cell-related         |
| 1441493_at   | Erc1                           | ELKS/RAB6-interacting/CAST family member 1                                                                                | Cluster0080_Paneth cell-related         |
| 1437712_x_at | Exosc4                         | exosome component 4                                                                                                       | Cluster0080_Paneth cell-related         |
| 1439688_at   | Fbln1                          | fibulin 1                                                                                                                 | Cluster0080_Paneth cell-related         |
| 1437812_x_at | Ganab                          | alpha glucosidase 2 alpha neutral subunit                                                                                 | Cluster0080_Paneth cell-related         |
| 1447012_at   | Gm10791                        | predicted gene 10791                                                                                                      | Cluster0080_Paneth cell-related         |
| 1437134_at   | Gm15393                        | predicted gene 15393                                                                                                      | Cluster0080_Paneth cell-related         |
| 1439386_x_at | Mat2a                          | methionine adenosyltransferase II, alpha                                                                                  | Cluster0080_Paneth cell-related         |
| 1439473_at   | NA                             | ---                                                                                                                       | Cluster0080_Paneth cell-related         |
| 1440824_at   | NA                             | ---                                                                                                                       | Cluster0080_Paneth cell-related         |
| 1442781_at   | NA                             | ---                                                                                                                       | Cluster0080_Paneth cell-related         |
| 1443848_at   | NA                             | ---                                                                                                                       | Cluster0080_Paneth cell-related         |
| 1444944_at   | NA                             | ---                                                                                                                       | Cluster0080_Paneth cell-related         |
| 1446805_at   | NA                             | ---                                                                                                                       | Cluster0080_Paneth cell-related         |
| 1447043_at   | NA                             | ---                                                                                                                       | Cluster0080_Paneth cell-related         |
| 1459640_at   | NA                             | ---                                                                                                                       | Cluster0080_Paneth cell-related         |
| 1429667_at   | Pou4f1                         | POU domain, class 4, transcription factor 1                                                                               | Cluster0080_Paneth cell-related         |
| 1460007_at   | Thyn1                          | thymocyte nuclear protein 1                                                                                               | Cluster0080_Paneth cell-related         |
| 1459818_x_at | Zmym3                          | zinc finger, MYM-type 3                                                                                                   | Cluster0080_Paneth cell-related         |
| 1429801_at   | 2310028H24Rik /// LOC100044215 | RIKEN cDNA 2310028H24 gene /// hypothetical protein LOC100044215                                                          | Cluster0081_Phagocyte-related           |
| 1418042_a_at | Abcc5                          | ATP-binding cassette, sub-family C (CFTR/MRP), member 5                                                                   | Cluster0081_Phagocyte-related           |
| 1427565_a_at | Abcc5                          | ATP-binding cassette, sub-family C (CFTR/MRP), member 5                                                                   | Cluster0081_Phagocyte-related           |
| 1438056_x_at | Abcc5                          | ATP-binding cassette, sub-family C (CFTR/MRP), member 5                                                                   | Cluster0081_Phagocyte-related           |
| 1443086_at   | Alcam                          | activated leukocyte cell adhesion molecule                                                                                | Cluster0081_Phagocyte-related           |
| 1449711_at   | Atp6v1e1                       | ATPase, H+ transporting, lysosomal V1 subunit E1                                                                          | Cluster0081_Phagocyte-related           |
| 1449712_s_at | Atp6v1e1                       | ATPase, H+ transporting, lysosomal V1 subunit E1                                                                          | Cluster0081_Phagocyte-related           |
| 1448788_at   | Cd200                          | CD200 antigen                                                                                                             | Cluster0081_Phagocyte-related           |
| 1450408_at   | Clcn7                          | chloride channel 7                                                                                                        | Cluster0081_Phagocyte-related           |
| 1452702_at   | Clcn7                          | chloride channel 7                                                                                                        | Cluster0081_Phagocyte-related           |
| 1449931_at   | Cpeb4                          | cytoplasmic polyadenylation element binding protein 4                                                                     | Cluster0081_Phagocyte-related           |
| 1417688_at   | Fam20c                         | family with sequence similarity 20, member C                                                                              | Cluster0081_Phagocyte-related           |
| 1443827_x_at | Fam20c                         | family with sequence similarity 20, member C                                                                              | Cluster0081_Phagocyte-related           |
| 1457648_x_at | Fam20c                         | family with sequence similarity 20, member C                                                                              | Cluster0081_Phagocyte-related           |
| 1429566_a_at | Hipk2                          | homeodomain interacting protein kinase 2                                                                                  | Cluster0081_Phagocyte-related           |

|              |                                          |                                                                                                             |                                                  |
|--------------|------------------------------------------|-------------------------------------------------------------------------------------------------------------|--------------------------------------------------|
| 1435490_at   | Hk3                                      | hexokinase 3                                                                                                | Cluster0081_Phagocyte-related                    |
| 1442798_x_at | Hk3                                      | hexokinase 3                                                                                                | Cluster0081_Phagocyte-related                    |
| 1421408_at   | IgSF6                                    | immunoglobulin superfamily, member 6                                                                        | Cluster0081_Phagocyte-related                    |
| 1449153_at   | Mmp12                                    | matrix metalloproteinase 12                                                                                 | Cluster0081_Phagocyte-related                    |
| 1433462_a_at | Pi4k2a                                   | phosphatidylinositol 4-kinase type 2 alpha                                                                  | Cluster0081_Phagocyte-related                    |
| 1449124_at   | Rgl1                                     | ral guanine nucleotide dissociation stimulator,-like 1                                                      | Cluster0081_Phagocyte-related                    |
| 1427619_a_at | SH3t1                                    | SH3 domain and tetrapeptide repeats 1                                                                       | Cluster0081_Phagocyte-related                    |
| 1418074_at   | St6galnac4                               | ST6 (alpha-N-acetyl-neuraminyl-2,3-beta-galactosyl-1,3)-N-acetylglactosaminide alpha-2,6-sialyltransferase  | Cluster0081_Phagocyte-related                    |
| 1418075_at   | St6galnac4                               | ST6 (alpha-N-acetyl-neuraminyl-2,3-beta-galactosyl-1,3)-N-acetylglactosaminide alpha-2,6-sialyltransferase  | Cluster0081_Phagocyte-related                    |
| 1451573_a_at | Stx4a                                    | syntaxin 4A (placental)                                                                                     | Cluster0081_Phagocyte-related                    |
| 1453341_a_at | Tmem202                                  | transmembrane protein 202                                                                                   | Cluster0081_Phagocyte-related                    |
| 1422434_a_at | 2210010C04Rik                            | RIKEN cDNA 2210010C04 gene                                                                                  | Cluster0082_Proteolysis-related                  |
| 1422435_at   | 2210010C04Rik                            | RIKEN cDNA 2210010C04 gene                                                                                  | Cluster0082_Proteolysis-related                  |
| 1422436_at   | 2210010C04Rik                            | RIKEN cDNA 2210010C04 gene                                                                                  | Cluster0082_Proteolysis-related                  |
| 1416055_at   | Amy2a2 /// Amy2a5                        | amylase 2a2 /// amylase 2a5                                                                                 | Cluster0082_Proteolysis-related                  |
| 1417257_at   | Cel                                      | carboxyl ester lipase                                                                                       | Cluster0082_Proteolysis-related                  |
| 1448281_a_at | Cela2a                                   | chymotrypsin-like elastase family, member 2A                                                                | Cluster0082_Proteolysis-related                  |
| 1415883_a_at | Cela3b                                   | chymotrypsin-like elastase family, member 3B                                                                | Cluster0082_Proteolysis-related                  |
| 1415884_at   | Cela3b                                   | chymotrypsin-like elastase family, member 3B                                                                | Cluster0082_Proteolysis-related                  |
| 1435611_x_at | Cela3b                                   | chymotrypsin-like elastase family, member 3B                                                                | Cluster0082_Proteolysis-related                  |
| 1435012_x_at | Cela3b /// Gm13011 /// LOC638418         | chymotrypsin-like elastase family, member 3B /// predicted gene 13011 /// similar to elastase 3B, pancrea   | Cluster0082_Proteolysis-related                  |
| 1437326_x_at | Cela3b /// LOC638418                     | chymotrypsin-like elastase family, member 3B /// similar to elastase 3B, pancreatic                         | Cluster0082_Proteolysis-related                  |
| 1428062_at   | Cpa1                                     | carboxypeptidase A1                                                                                         | Cluster0082_Proteolysis-related                  |
| 1454623_at   | Cpa2                                     | carboxypeptidase A2, pancreatic                                                                             | Cluster0082_Proteolysis-related                  |
| 1428102_at   | Cpb1                                     | carboxypeptidase B1 (tissue)                                                                                | Cluster0082_Proteolysis-related                  |
| 1448220_at   | Ctrb1                                    | chymotrypsinogen B1                                                                                         | Cluster0082_Proteolysis-related                  |
| 1431763_a_at | Ctrl                                     | chymotrypsin-like                                                                                           | Cluster0082_Proteolysis-related                  |
| 1422682_s_at | EG436523 /// Gm10334 /// Prss1 /// Prss2 | predicted gene, EG436523 /// predicted gene 10334 /// protease, serine, 1 (trypsin 1) /// protease, serine, | Cluster0082_Proteolysis-related                  |
| 1421868_a_at | Pnlip                                    | pancreatic lipase                                                                                           | Cluster0082_Proteolysis-related                  |
| 1433431_at   | Pnlip                                    | pancreatic lipase                                                                                           | Cluster0082_Proteolysis-related                  |
| 1417682_a_at | Prss2                                    | protease, serine, 2                                                                                         | Cluster0082_Proteolysis-related                  |
| 1433459_x_at | Prss2                                    | protease, serine, 2                                                                                         | Cluster0082_Proteolysis-related                  |
| 1433573_x_at | Prss2                                    | protease, serine, 2                                                                                         | Cluster0082_Proteolysis-related                  |
| 1435507_x_at | Prss2                                    | protease, serine, 2                                                                                         | Cluster0082_Proteolysis-related                  |
| 1416139_at   | Reg2                                     | regenerating islet-derived 2                                                                                | Cluster0082_Proteolysis-related                  |
| 1415954_at   | Try4 /// Try5                            | trypsin 4 /// trypsin 5                                                                                     | Cluster0082_Proteolysis-related                  |
| 1437900_at   | 4930523C07Rik                            | RIKEN cDNA 4930523C07 gene                                                                                  | Cluster0083_High in NKcells, T cells and B cells |
| 1453103_at   | Ablim1                                   | actin-binding LIM protein 1                                                                                 | Cluster0083_High in NKcells, T cells and B cells |
| 1454708_at   | Ablim1                                   | actin-binding LIM protein 1                                                                                 | Cluster0083_High in NKcells, T cells and B cells |
| 1418553_at   | Arhgef18                                 | rho/rac guanine nucleotide exchange factor (GEF) 18                                                         | Cluster0083_High in NKcells, T cells and B cells |
| 1425706_a_at | Ddb2                                     | damage specific DNA binding protein 2                                                                       | Cluster0083_High in NKcells, T cells and B cells |
| 1422028_a_at | Ets1                                     | E26 avian leukemia oncogene 1, 5 domain                                                                     | Cluster0083_High in NKcells, T cells and B cells |
| 1426725_s_at | Ets1                                     | E26 avian leukemia oncogene 1, 5 domain                                                                     | Cluster0083_High in NKcells, T cells and B cells |
| 1452163_at   | Ets1                                     | E26 avian leukemia oncogene 1, 5 domain                                                                     | Cluster0083_High in NKcells, T cells and B cells |
| 1416982_at   | Foxo1                                    | forkhead box O1                                                                                             | Cluster0083_High in NKcells, T cells and B cells |
| 1416983_s_at | Foxo1                                    | forkhead box O1                                                                                             | Cluster0083_High in NKcells, T cells and B cells |
| 1449220_at   | Gimap3 /// LOC100044538                  | GTPase, IMAP family member 3 /// similar to immunity-associated nucleotide 4                                | Cluster0083_High in NKcells, T cells and B cells |
| 1424374_at   | Gimap4                                   | GTPase, IMAP family member 4                                                                                | Cluster0083_High in NKcells, T cells and B cells |
| 1424375_s_at | Gimap4                                   | GTPase, IMAP family member 4                                                                                | Cluster0083_High in NKcells, T cells and B cells |
| 1456762_at   | Gimap6                                   | GTPase, IMAP family member 6                                                                                | Cluster0083_High in NKcells, T cells and B cells |
| 1425084_at   | Gimap7                                   | GTPase, IMAP family member 7                                                                                | Cluster0083_High in NKcells, T cells and B cells |
| 1444283_at   | Gimap7                                   | GTPase, IMAP family member 7                                                                                | Cluster0083_High in NKcells, T cells and B cells |
| 1435772_at   | Kif21b                                   | kinesin family member 21B                                                                                   | Cluster0083_High in NKcells, T cells and B cells |
| 1456453_at   | NA                                       | ---                                                                                                         | Cluster0083_High in NKcells, T cells and B cells |
| 1458604_at   | NA                                       | ---                                                                                                         | Cluster0083_High in NKcells, T cells and B cells |
| 1458607_at   | NA                                       | ---                                                                                                         | Cluster0083_High in NKcells, T cells and B cells |
| 1434333_a_at | Prkd2                                    | protein kinase D2                                                                                           | Cluster0083_High in NKcells, T cells and B cells |

|                       |                 |                                                                                       |                                                  |
|-----------------------|-----------------|---------------------------------------------------------------------------------------|--------------------------------------------------|
| 1436589_x_at          | Prkd2           | protein kinase D2                                                                     | Cluster0083_High in NKcells, T cells and B cells |
| 1443878_at            | Rapgef6         | Rap guanine nucleotide exchange factor (GEF) 6                                        | Cluster0083_High in NKcells, T cells and B cells |
| 1451024_at            | S1pr4           | sphingosine-1-phosphate receptor 4                                                    | Cluster0083_High in NKcells, T cells and B cells |
| 1423986_a_at          | Shisa5          | shisa homolog 5 ( <i>Xenopus laevis</i> )                                             | Cluster0083_High in NKcells, T cells and B cells |
| 1421476_a_at          | Cant1           | calcium activated nucleotidase 1                                                      | Cluster0084_Intestine-related                    |
| 1451688_s_at          | Cant1           | calcium activated nucleotidase 1                                                      | Cluster0084_Intestine-related                    |
| 1431692_a_at          | Cblc            | Casitas B-lineage lymphoma c                                                          | Cluster0084_Intestine-related                    |
| 1417232_at            | Cldn2           | claudin 2                                                                             | Cluster0084_Intestine-related                    |
| 1426332_a_at          | Cldn3           | claudin 3                                                                             | Cluster0084_Intestine-related                    |
| 1431233_at            | Cnnm4           | cyclin M4                                                                             | Cluster0084_Intestine-related                    |
| 1424809_at            | Crb3            | crumbs homolog 3 ( <i>Drosophila</i> )                                                | Cluster0084_Intestine-related                    |
| 1421156_a_at          | Dsc2            | desmocollin 2                                                                         | Cluster0084_Intestine-related                    |
| 1427610_at            | Dsp             | desmoplakin                                                                           | Cluster0084_Intestine-related                    |
| 1421983_s_at          | Hnf4a           | hepatic nuclear factor 4, alpha                                                       | Cluster0084_Intestine-related                    |
| 1455121_at            | Lcor            | ligand dependent nuclear receptor corepressor                                         | Cluster0084_Intestine-related                    |
| 1423322_at            | Lin7c           | lin-7 homolog C ( <i>C. elegans</i> )                                                 | Cluster0084_Intestine-related                    |
| 1451255_at            | Lsr             | lipolysis stimulated lipoprotein receptor                                             | Cluster0084_Intestine-related                    |
| 1421120_at            | Myo6            | myosin VI                                                                             | Cluster0084_Intestine-related                    |
| 1421321_a_at          | Net1            | neuroepithelial cell transforming gene 1                                              | Cluster0084_Intestine-related                    |
| 1448873_at            | Ocln            | occludin                                                                              | Cluster0084_Intestine-related                    |
| 1435053_s_at          | Plekhh1         | pleckstrin homology domain containing, family H (with MyTH4 domain) member 1          | Cluster0084_Intestine-related                    |
| 1431938_a_at          | Pmm2            | phosphomannomutase 2                                                                  | Cluster0084_Intestine-related                    |
| 1417738_at            | Rab25           | RAB25, member RAS oncogene family                                                     | Cluster0084_Intestine-related                    |
| 1424579_at            | Slc35a3         | solute carrier family 35 (UDP-N-acetylglucosamine (UDP-GlcNAc) transporter), member 3 | Cluster0084_Intestine-related                    |
| 1424580_at            | Slc35a3         | solute carrier family 35 (UDP-N-acetylglucosamine (UDP-GlcNAc) transporter), member 3 | Cluster0084_Intestine-related                    |
| 1429649_at            | Slc35a3         | solute carrier family 35 (UDP-N-acetylglucosamine (UDP-GlcNAc) transporter), member 3 | Cluster0084_Intestine-related                    |
| 1422779_at            | Smpd3           | sphingomyelin phosphodiesterase 3, neutral                                            | Cluster0084_Intestine-related                    |
| 1424653_at            | Tspan15         | tetraspanin 15                                                                        | Cluster0084_Intestine-related                    |
| 1427960_at            | Ugt2b34         | UDP glucuronosyltransferase 2 family, polypeptide B34                                 | Cluster0084_Intestine-related                    |
| 1436172_at            | 9530028C05      | hypothetical protein 9530028C05                                                       | Cluster0085_High in haematopoietic cells         |
| 1437636_at            | E030037K03Rik   | RIKEN cDNA E030037K03 gene                                                            | Cluster0085_High in haematopoietic cells         |
| 1425156_at            | Gbp6            | guanylate binding protein 6                                                           | Cluster0085_High in haematopoietic cells         |
| 1434380_at            | Gbp6            | guanylate binding protein 6                                                           | Cluster0085_High in haematopoietic cells         |
| 1448775_at            | Ifi203          | interferon activated gene 203                                                         | Cluster0085_High in haematopoietic cells         |
| 1451567_a_at          | Ifi203          | interferon activated gene 203                                                         | Cluster0085_High in haematopoietic cells         |
| 1417292_at            | Ifi47           | interferon gamma inducible protein 47                                                 | Cluster0085_High in haematopoietic cells         |
| 1426906_at            | Mndal           | myeloid nuclear differentiation antigen like                                          | Cluster0085_High in haematopoietic cells         |
| 1452231_x_at          | Mndal           | myeloid nuclear differentiation antigen like                                          | Cluster0085_High in haematopoietic cells         |
| 1420671_x_at          | Ms4a4c          | membrane-spanning 4-domains, subfamily A, member 4C                                   | Cluster0085_High in haematopoietic cells         |
| 1450291_s_at          | Ms4a4c          | membrane-spanning 4-domains, subfamily A, member 4C                                   | Cluster0085_High in haematopoietic cells         |
| 1437176_at            | Nlrc5           | NLR family, CARD domain containing 5                                                  | Cluster0085_High in haematopoietic cells         |
| 1434139_at            | Parp11          | poly (ADP-ribose) polymerase family, member 11                                        | Cluster0085_High in haematopoietic cells         |
| 1435330_at            | Pyhin1          | pyrin and HIN domain family, member 1                                                 | Cluster0085_High in haematopoietic cells         |
| 1435331_at            | Pyhin1          | pyrin and HIN domain family, member 1                                                 | Cluster0085_High in haematopoietic cells         |
| 1418131_at            | Samhd1          | SAM domain and HD domain, 1                                                           | Cluster0085_High in haematopoietic cells         |
| 1436120_at            | Setdb2          | SET domain, bifurcated 2                                                              | Cluster0085_High in haematopoietic cells         |
| 1434457_at            | Sp100           | nuclear antigen Sp100                                                                 | Cluster0085_High in haematopoietic cells         |
| 1429563_x_at          | Sp110           | Sp110 nuclear body protein                                                            | Cluster0085_High in haematopoietic cells         |
| 1416016_at            | Tap1            | transporter 1, ATP-binding cassette, sub-family B (MDR/TAP)                           | Cluster0085_High in haematopoietic cells         |
| 1421812_at            | Tapbp           | TAP binding protein                                                                   | Cluster0085_High in haematopoietic cells         |
| 1449009_at            | Tgtp1 /// Tgtp2 | T-cell specific GTPase 1 /// T-cell specific GTPase 2                                 | Cluster0085_High in haematopoietic cells         |
| 1448940_at            | Trim21          | tripartite motif-containing 21                                                        | Cluster0085_High in haematopoietic cells         |
| 1417961_a_at          | Trim30          | tripartite motif-containing 30                                                        | Cluster0085_High in haematopoietic cells         |
| 1436899_at            | Zufsp           | zinc finger with UFM1-specific peptidase domain                                       | Cluster0085_High in haematopoietic cells         |
| AFFX-GapdhMur/M:Gapdh |                 | glyceraldehyde-3-phosphate dehydrogenase                                              | Cluster0086_Affymetrix control probe sets        |
| AFFX-GapdhMur/M:Gapdh |                 | glyceraldehyde-3-phosphate dehydrogenase                                              | Cluster0086_Affymetrix control probe sets        |
| AFFX-GapdhMur/M:Gapdh |                 | glyceraldehyde-3-phosphate dehydrogenase                                              | Cluster0086_Affymetrix control probe sets        |





|              |               |                                                                                   |                                      |
|--------------|---------------|-----------------------------------------------------------------------------------|--------------------------------------|
| 1431700_at   | Grin2b        | glutamate receptor, ionotropic, NMDA2B (epsilon 2)                                | Cluster0088_Low in some Paneth cells |
| 1422950_at   | Hes7          | hairy and enhancer of split 7 (Drosophila)                                        | Cluster0088_Low in some Paneth cells |
| 1456301_at   | Hoxc5         | homeobox C5                                                                       | Cluster0088_Low in some Paneth cells |
| 1425237_at   | Krtap16-8     | keratin associated protein 16-8                                                   | Cluster0088_Low in some Paneth cells |
| 1443914_at   | Lipk          | lipase, family member K                                                           | Cluster0088_Low in some Paneth cells |
| 1445901_at   | Lrp2          | low density lipoprotein receptor-related protein 2                                | Cluster0088_Low in some Paneth cells |
| 1421597_a_at | Msx3          | homeobox, msh-like 3                                                              | Cluster0088_Low in some Paneth cells |
| 1441738_at   | NA            | ---                                                                               | Cluster0088_Low in some Paneth cells |
| 1444918_at   | NA            | ---                                                                               | Cluster0088_Low in some Paneth cells |
| 1443817_x_at | Nkx2-6        | NK2 transcription factor related, locus 6 (Drosophila)                            | Cluster0088_Low in some Paneth cells |
| 1423012_at   | Syt7          | synaptotagmin VII                                                                 | Cluster0088_Low in some Paneth cells |
| 1430422_at   | 1700020A23Rik | RIKEN cDNA 1700020A23 gene                                                        | Cluster0089_Low in some Paneth cells |
| 1433287_at   | 4833417J16Rik | RIKEN cDNA 4833417J16 gene                                                        | Cluster0089_Low in some Paneth cells |
| 1431481_at   | 4930443O20Rik | RIKEN cDNA 4930443O20 gene                                                        | Cluster0089_Low in some Paneth cells |
| 1433343_at   | 4930448K20Rik | glyceraldehyde-3-phosphate dehydrogenase pseudogene                               | Cluster0089_Low in some Paneth cells |
| 1433400_at   | 5033405D04Rik | RIKEN cDNA 5033405D04 gene                                                        | Cluster0089_Low in some Paneth cells |
| 1460427_a_at | Adam28        | a disintegrin and metallopeptidase domain 28                                      | Cluster0089_Low in some Paneth cells |
| 1419096_at   | Apom          | apolipoprotein M                                                                  | Cluster0089_Low in some Paneth cells |
| 1437555_at   | Barh12        | BarH-like 2 (Drosophila)                                                          | Cluster0089_Low in some Paneth cells |
| 1427627_at   | BC038268      | cDNA sequence BC038268                                                            | Cluster0089_Low in some Paneth cells |
| 1416887_at   | C1d           | C1D nuclear receptor co-repressor                                                 | Cluster0089_Low in some Paneth cells |
| 1459610_at   | C87490        | expressed sequence C87490                                                         | Cluster0089_Low in some Paneth cells |
| 1445950_at   | C87926        | cDNA sequence, C87926                                                             | Cluster0089_Low in some Paneth cells |
| 1427780_at   | Defb35        | defensin beta 35                                                                  | Cluster0089_Low in some Paneth cells |
| 1433089_at   | NA            | ---                                                                               | Cluster0089_Low in some Paneth cells |
| 1443519_at   | NA            | ---                                                                               | Cluster0089_Low in some Paneth cells |
| 1445139_at   | NA            | ---                                                                               | Cluster0089_Low in some Paneth cells |
| 1445907_at   | NA            | ---                                                                               | Cluster0089_Low in some Paneth cells |
| 1446903_at   | NA            | ---                                                                               | Cluster0089_Low in some Paneth cells |
| 1459422_at   | NA            | ---                                                                               | Cluster0089_Low in some Paneth cells |
| 1447311_at   | Slc6a2        | solute carrier family 6 (neurotransmitter transporter, noradrenalin), member 2    | Cluster0089_Low in some Paneth cells |
| 1433026_at   | Tmpo          | thymopoietin                                                                      | Cluster0089_Low in some Paneth cells |
| 1427507_at   | Trim17        | tripartite motif-containing 17                                                    | Cluster0089_Low in some Paneth cells |
| 1454321_at   | 1500005C15Rik | RIKEN cDNA 1500005C15 gene                                                        | Cluster0090_Low in some Paneth cells |
| 1432734_at   | 4933402E15Rik | RIKEN cDNA 4933402E15 gene                                                        | Cluster0090_Low in some Paneth cells |
| 1431849_at   | 4933432B09Rik | RIKEN cDNA 4933432B09 gene                                                        | Cluster0090_Low in some Paneth cells |
| 1432681_at   | 9130009M17Rik | RIKEN cDNA 9130009M17 gene                                                        | Cluster0090_Low in some Paneth cells |
| 1442850_at   | AU045717      | expressed sequence AU045717                                                       | Cluster0090_Low in some Paneth cells |
| 1450182_at   | Clcna         | chloride channel Ka                                                               | Cluster0090_Low in some Paneth cells |
| 1432766_at   | E130112B07Rik | RIKEN cDNA E130112B07 gene                                                        | Cluster0090_Low in some Paneth cells |
| 1419980_at   | Gba2          | glucosidase beta 2                                                                | Cluster0090_Low in some Paneth cells |
| 1444448_at   | Gm10392       | predicted gene 10392                                                              | Cluster0090_Low in some Paneth cells |
| 1417973_at   | Itih1         | inter-alpha trypsin inhibitor, heavy chain 1                                      | Cluster0090_Low in some Paneth cells |
| 1438323_at   | Lim2          | lens intrinsic membrane protein 2                                                 | Cluster0090_Low in some Paneth cells |
| 1440321_at   | Mast2         | Microtubule associated serine/threonine kinase 2                                  | Cluster0090_Low in some Paneth cells |
| 1437823_at   | NA            | ---                                                                               | Cluster0090_Low in some Paneth cells |
| 1445622_at   | NA            | ---                                                                               | Cluster0090_Low in some Paneth cells |
| 1445961_at   | NA            | ---                                                                               | Cluster0090_Low in some Paneth cells |
| 1458675_at   | NA            | ---                                                                               | Cluster0090_Low in some Paneth cells |
| 1458957_at   | NA            | ---                                                                               | Cluster0090_Low in some Paneth cells |
| 1431373_at   | Pop5          | processing of precursor 5, ribonuclease P/MRP family (S. cerevisiae)              | Cluster0090_Low in some Paneth cells |
| 1422913_at   | Ppm3          | protamine 3                                                                       | Cluster0090_Low in some Paneth cells |
| 1455226_at   | Spnb1         | spectrin beta 1                                                                   | Cluster0090_Low in some Paneth cells |
| 1439838_a_at | Tmie          | transmembrane inner ear                                                           | Cluster0090_Low in some Paneth cells |
| 1434494_at   | Zar1          | zygote arrest 1                                                                   | Cluster0090_Low in some Paneth cells |
| 1427557_at   | Alg12         | asparagine-linked glycosylation 12 homolog (yeast, alpha-1,6-mannosyltransferase) | Cluster0091_House keeping            |
| 1427558_s_at | Alg12         | asparagine-linked glycosylation 12 homolog (yeast, alpha-1,6-mannosyltransferase) | Cluster0091_House keeping            |

|              |                         |                                                                                              |                                |
|--------------|-------------------------|----------------------------------------------------------------------------------------------|--------------------------------|
| 1453744_a_at | Ankrd40                 | ankyrin repeat domain 40                                                                     | Cluster0091_House keeping      |
| 1416374_at   | Ap3m1                   | adaptor-related protein complex 3, mu 1 subunit                                              | Cluster0091_House keeping      |
| 1448309_at   | Ap3m1                   | adaptor-related protein complex 3, mu 1 subunit                                              | Cluster0091_House keeping      |
| 1426313_at   | Bre                     | brain and reproductive organ-expressed protein                                               | Cluster0091_House keeping      |
| 1422845_at   | Canx                    | calnexin                                                                                     | Cluster0091_House keeping      |
| 1429385_at   | Dcaf7                   | DDB1 and CUL4 associated factor 7                                                            | Cluster0091_House keeping      |
| 1450030_at   | Dctn4                   | dynactin 4                                                                                   | Cluster0091_House keeping      |
| 1431645_a_at | Gdi2                    | guanosine diphosphate (GDP) dissociation inhibitor 2                                         | Cluster0091_House keeping      |
| 1421876_at   | Mapk9                   | mitogen-activated protein kinase 9                                                           | Cluster0091_House keeping      |
| 1452037_at   | Mgat2                   | mannoside acetylglucosaminyltransferase 2                                                    | Cluster0091_House keeping      |
| 1424185_a_at | Morf4l1                 | mortality factor 4 like 1                                                                    | Cluster0091_House keeping      |
| 1425459_at   | Mtmr2                   | myotubularin related protein 2                                                               | Cluster0091_House keeping      |
| 1423715_a_at | Nedd8                   | neural precursor cell expressed, developmentally down-regulated gene 8                       | Cluster0091_House keeping      |
| 1423599_a_at | Pdcl                    | phosducin-like                                                                               | Cluster0091_House keeping      |
| 1420839_at   | Plekha3                 | pleckstrin homology domain-containing, family A (phosphoinositide binding specific) member 3 | Cluster0091_House keeping      |
| 1450368_a_at | Ppp3r1                  | protein phosphatase 3, regulatory subunit B, alpha isoform (calcineurin B, type I)           | Cluster0091_House keeping      |
| 1424332_at   | Rab40c                  | Rab40c, member RAS oncogene family                                                           | Cluster0091_House keeping      |
| 1460717_at   | Tspyl1                  | testis-specific protein, Y-encoded-like 1                                                    | Cluster0091_House keeping      |
| 1417033_at   | Ube2g2                  | ubiquitin-conjugating enzyme E2G 2                                                           | Cluster0091_House keeping      |
| 1419385_a_at | Ubqln1                  | ubiquilin 1                                                                                  | Cluster0091_House keeping      |
| 1438531_at   | A730054J21Rik           | RIKEN cDNA A730054J21 gene                                                                   | Cluster0092_Mesenchyme-related |
| 1419728_at   | Cxcl5                   | chemokine (C-X-C motif) ligand 5                                                             | Cluster0092_Mesenchyme-related |
| 1422243_at   | Fgf7                    | fibroblast growth factor 7                                                                   | Cluster0092_Mesenchyme-related |
| 1438405_at   | Fgf7                    | fibroblast growth factor 7                                                                   | Cluster0092_Mesenchyme-related |
| 1438954_x_at | Figf                    | c-fos induced growth factor                                                                  | Cluster0092_Mesenchyme-related |
| 1438953_at   | Figf /// LOC100047108   | c-fos induced growth factor /// similar to FIGF                                              | Cluster0092_Mesenchyme-related |
| 1417962_s_at | Ghr                     | growth hormone receptor                                                                      | Cluster0092_Mesenchyme-related |
| 1451501_a_at | Ghr                     | growth hormone receptor                                                                      | Cluster0092_Mesenchyme-related |
| 1451871_a_at | Ghr                     | growth hormone receptor                                                                      | Cluster0092_Mesenchyme-related |
| 1417673_at   | Grb14                   | growth factor receptor bound protein 14                                                      | Cluster0092_Mesenchyme-related |
| 1440990_at   | Kif26b                  | kinesin family member 26B                                                                    | Cluster0092_Mesenchyme-related |
| 1426306_a_at | LOC100046560 /// Maged2 | similar to melanoma antigen family D, 2 /// melanoma antigen, family D, 2                    | Cluster0092_Mesenchyme-related |
| 1459304_at   | NA                      | ---                                                                                          | Cluster0092_Mesenchyme-related |
| 1449298_a_at | Pde1a                   | phosphodiesterase 1A, calmodulin-dependent                                                   | Cluster0092_Mesenchyme-related |
| 1421916_at   | Pdgfra                  | platelet derived growth factor receptor, alpha polypeptide                                   | Cluster0092_Mesenchyme-related |
| 1421917_at   | Pdgfra                  | platelet derived growth factor receptor, alpha polypeptide                                   | Cluster0092_Mesenchyme-related |
| 1420696_at   | Sema3c                  | sema domain, immunoglobulin domain (Ig), short basic domain, secreted, (semaphorin) 3C       | Cluster0092_Mesenchyme-related |
| 1424659_at   | Slit2                   | slit homolog 2 (Drosophila)                                                                  | Cluster0092_Mesenchyme-related |
| 1417633_at   | Sod3                    | superoxide dismutase 3, extracellular                                                        | Cluster0092_Mesenchyme-related |
| 1417634_at   | Sod3                    | superoxide dismutase 3, extracellular                                                        | Cluster0092_Mesenchyme-related |
| 1425620_at   | Tgfb3                   | transforming growth factor, beta receptor III                                                | Cluster0092_Mesenchyme-related |
| 1452065_at   | Vstm2a                  | V-set and transmembrane domain containing 2A                                                 | Cluster0092_Mesenchyme-related |
| 1430743_at   | 4930412F12Rik           | RIKEN cDNA 4930412F12 gene                                                                   | Cluster0093_Uncertain          |
| 1459053_at   | Agap1                   | ArfGAP with GTPase domain, ankyrin repeat and PH domain 1                                    | Cluster0093_Uncertain          |
| 1457427_at   | Ajap1                   | adherens junction associated protein 1                                                       | Cluster0093_Uncertain          |
| 1456206_at   | Alkbh3                  | AlkB, alkylation repair homolog 3 (E. coli)                                                  | Cluster0093_Uncertain          |
| 1460658_at   | Ap1g1                   | adaptor protein complex AP-1, gamma 1 subunit                                                | Cluster0093_Uncertain          |
| 1443685_at   | Ccdc106                 | Coiled-coil domain containing 106                                                            | Cluster0093_Uncertain          |
| 1422989_a_at | Dmpk                    | dystrophia myotonica-protein kinase                                                          | Cluster0093_Uncertain          |
| 1458225_at   | Fkbp14                  | FK506 binding protein 14                                                                     | Cluster0093_Uncertain          |
| 1459050_at   | Gm996                   | Predicted gene 996                                                                           | Cluster0093_Uncertain          |
| 1457236_at   | Gpr62                   | G protein-coupled receptor 62                                                                | Cluster0093_Uncertain          |
| 1421393_at   | Grin2d                  | glutamate receptor, ionotropic, NMDA2D (epsilon 4)                                           | Cluster0093_Uncertain          |
| 1433251_at   | Hsp90aa1                | heat shock protein 90, alpha (cytosolic), class A member 1                                   | Cluster0093_Uncertain          |
| 1437897_at   | Klhl21                  | kelch-like 21 (Drosophila)                                                                   | Cluster0093_Uncertain          |
| 1427824_at   | NA                      | ---                                                                                          | Cluster0093_Uncertain          |
| 1431227_at   | NA                      | ---                                                                                          | Cluster0093_Uncertain          |

|              |                                 |                                                                                                                         |                                                |
|--------------|---------------------------------|-------------------------------------------------------------------------------------------------------------------------|------------------------------------------------|
| 1445696_x_at | NA                              | ---                                                                                                                     | Cluster0093_Uncertain                          |
| 1445812_at   | NA                              | ---                                                                                                                     | Cluster0093_Uncertain                          |
| 1438286_at   | Otud7a                          | OTU domain containing 7A                                                                                                | Cluster0093_Uncertain                          |
| 1457014_x_at | Slc16a8                         | solute carrier family 16 (monocarboxylic acid transporters), member 8                                                   | Cluster0093_Uncertain                          |
| 1447573_at   | Slc32a1                         | Solute carrier family 32 (GABA vesicular transporter), member 1                                                         | Cluster0093_Uncertain                          |
| 1421245_at   | Sost                            | sclerostin                                                                                                              | Cluster0093_Uncertain                          |
| 1450485_at   | Sox3                            | SRY-box containing gene 3                                                                                               | Cluster0093_Uncertain                          |
| 1429628_at   | 6330407J23Rik                   | RIKEN cDNA 6330407J23 gene                                                                                              | Cluster0094_High in astrocytes & Neuro2A cells |
| 1433577_at   | A730017C20Rik                   | RIKEN cDNA A730017C20 gene                                                                                              | Cluster0094_High in astrocytes & Neuro2A cells |
| 1437528_x_at | A730017C20Rik                   | RIKEN cDNA A730017C20 gene                                                                                              | Cluster0094_High in astrocytes & Neuro2A cells |
| 1435605_at   | Actr3b                          | ARP3 actin-related protein 3 homolog B (yeast)                                                                          | Cluster0094_High in astrocytes & Neuro2A cells |
| 1426097_a_at | Ccdc106                         | coiled-coil domain containing 106                                                                                       | Cluster0094_High in astrocytes & Neuro2A cells |
| 1455440_at   | Clcn6                           | chloride channel 6                                                                                                      | Cluster0094_High in astrocytes & Neuro2A cells |
| 1455419_at   | D630045J12Rik                   | RIKEN cDNA D630045J12 gene                                                                                              | Cluster0094_High in astrocytes & Neuro2A cells |
| 1434582_at   | Erc2                            | ELKS/RAB6-interacting/CAST family member 2                                                                              | Cluster0094_High in astrocytes & Neuro2A cells |
| 1435951_at   | Grip1                           | glutamate receptor interacting protein 1                                                                                | Cluster0094_High in astrocytes & Neuro2A cells |
| 1428221_at   | Klhdc8b                         | kelch domain containing 8B                                                                                              | Cluster0094_High in astrocytes & Neuro2A cells |
| 1427246_at   | Magi1                           | membrane associated guanylate kinase, WW and PDZ domain containing 1                                                    | Cluster0094_High in astrocytes & Neuro2A cells |
| 1424718_at   | Mapt                            | microtubule-associated protein tau                                                                                      | Cluster0094_High in astrocytes & Neuro2A cells |
| 1455917_at   | Ntrk3                           | neurotrophic tyrosine kinase, receptor, type 3                                                                          | Cluster0094_High in astrocytes & Neuro2A cells |
| 1457446_at   | Opcml                           | opioid binding protein/cell adhesion molecule-like                                                                      | Cluster0094_High in astrocytes & Neuro2A cells |
| 1418746_at   | Pnkd                            | paroxysmal nonkinesinogenic dyskinesia                                                                                  | Cluster0094_High in astrocytes & Neuro2A cells |
| 1426621_a_at | Ppp2r2b                         | protein phosphatase 2 (formerly 2A), regulatory subunit B (PR 52), beta isoform                                         | Cluster0094_High in astrocytes & Neuro2A cells |
| 1450659_at   | Rgs7                            | regulator of G protein signaling 7                                                                                      | Cluster0094_High in astrocytes & Neuro2A cells |
| 1452386_at   | Sall3                           | sal-like 3 (Drosophila)                                                                                                 | Cluster0094_High in astrocytes & Neuro2A cells |
| 1423515_at   | Scn8a                           | sodium channel, voltage-gated, type VIII, alpha                                                                         | Cluster0094_High in astrocytes & Neuro2A cells |
| 1425181_at   | Sgip1                           | SH3-domain GRB2-like (endophilin) interacting protein 1                                                                 | Cluster0094_High in astrocytes & Neuro2A cells |
| 1435026_at   | Spock2                          | sparc/osteonectin, cwcv and kazal-like domains proteoglycan 2                                                           | Cluster0094_High in astrocytes & Neuro2A cells |
| 1449264_at   | Syt11                           | synaptotagmin XI                                                                                                        | Cluster0094_High in astrocytes & Neuro2A cells |
| 1419758_at   | Abcb1a                          | ATP-binding cassette, sub-family B (MDR/TAP), member 1A                                                                 | Cluster0095_Intestine-related                  |
| 1425538_x_at | Ceacam1                         | carcinoembryonic antigen-related cell adhesion molecule 1                                                               | Cluster0095_Intestine-related                  |
| 1427630_x_at | Ceacam1                         | carcinoembryonic antigen-related cell adhesion molecule 1                                                               | Cluster0095_Intestine-related                  |
| 1450494_x_at | Ceacam1                         | carcinoembryonic antigen-related cell adhesion molecule 1                                                               | Cluster0095_Intestine-related                  |
| 1460681_at   | Ceacam1                         | carcinoembryonic antigen-related cell adhesion molecule 1                                                               | Cluster0095_Intestine-related                  |
| 1422123_s_at | Ceacam1 /// Ceacam2             | carcinoembryonic antigen-related cell adhesion molecule 1 /// carcinoembryonic antigen-related cell adhesion molecule 2 | Cluster0095_Intestine-related                  |
| 1460682_s_at | Ceacam1 /// Ceacam2             | carcinoembryonic antigen-related cell adhesion molecule 1 /// carcinoembryonic antigen-related cell adhesion molecule 2 | Cluster0095_Intestine-related                  |
| 1432363_at   | Gm3336                          | predicted gene 3336                                                                                                     | Cluster0095_Intestine-related                  |
| 1418352_at   | Hsd17b2                         | hydroxysteroid (17-beta) dehydrogenase 2                                                                                | Cluster0095_Intestine-related                  |
| 1421178_at   | Mgat4c                          | mannosyl (alpha-1,3-)-glycoprotein beta-1,4-N-acetylglucosaminyltransferase, isozyme C (putative)                       | Cluster0095_Intestine-related                  |
| 1422597_at   | Mmp15                           | matrix metalloproteinase 15                                                                                             | Cluster0095_Intestine-related                  |
| 1428435_at   | Muc2                            | mucin 2                                                                                                                 | Cluster0095_Intestine-related                  |
| 1442837_at   | NA                              | ---                                                                                                                     | Cluster0095_Intestine-related                  |
| 1418871_a_at | Phgr1                           | proline/histidine/glycine-rich 1                                                                                        | Cluster0095_Intestine-related                  |
| 1449952_s_at | Prss30                          | protease, serine, 30                                                                                                    | Cluster0095_Intestine-related                  |
| 1453004_at   | Slc22a23                        | solute carrier family 22, member 23                                                                                     | Cluster0095_Intestine-related                  |
| 1416596_at   | Slc44a4                         | solute carrier family 44, member 4                                                                                      | Cluster0095_Intestine-related                  |
| 1437259_at   | Slc9a2                          | solute carrier family 9 (sodium/hydrogen exchanger), member 2                                                           | Cluster0095_Intestine-related                  |
| 1450618_a_at | Sprr2a1 /// Sprr2a2             | small proline-rich protein 2A1 /// small proline-rich protein 2A2                                                       | Cluster0095_Intestine-related                  |
| 1439016_x_at | Sprr2a1 /// Sprr2a2 /// Sprr2a3 | small proline-rich protein 2A1 /// small proline-rich protein 2A2 /// small proline-rich protein 2A3                    | Cluster0095_Intestine-related                  |
| 1451557_at   | Tat                             | tyrosine aminotransferase                                                                                               | Cluster0095_Intestine-related                  |
| 1436786_at   | 1110069O07Rik                   | RIKEN cDNA 1110069O07 gene                                                                                              | Cluster0096_High in NALT                       |
| 1436787_x_at | 1110069O07Rik                   | RIKEN cDNA 1110069O07 gene                                                                                              | Cluster0096_High in NALT                       |
| 1430396_at   | 5730403I07Rik                   | RIKEN cDNA 5730403I07 gene                                                                                              | Cluster0096_High in NALT                       |
| 1449417_at   | Ambn                            | ameloblastin                                                                                                            | Cluster0096_High in NALT                       |
| 1451614_a_at | Amelx                           | amelogenin X chromosome                                                                                                 | Cluster0096_High in NALT                       |
| 1451686_x_at | Amelx                           | amelogenin X chromosome                                                                                                 | Cluster0096_High in NALT                       |
| 1422181_at   | Cnga2                           | cyclic nucleotide gated channel alpha 2                                                                                 | Cluster0096_High in NALT                       |

|              |                         |                                                                                                               |                                          |
|--------------|-------------------------|---------------------------------------------------------------------------------------------------------------|------------------------------------------|
| 1449565_at   | Cyp2g1                  | cytochrome P450, family 2, subfamily g, polypeptide 1                                                         | Cluster0096_High in NALT                 |
| 1439957_at   | Gnal                    | guanine nucleotide binding protein, alpha stimulating, olfactory type                                         | Cluster0096_High in NALT                 |
| 1452135_at   | Gpx6                    | glutathione peroxidase 6                                                                                      | Cluster0096_High in NALT                 |
| 1422304_at   | Lcn4                    | lipocalin 4                                                                                                   | Cluster0096_High in NALT                 |
| 1422199_at   | Omp                     | olfactory marker protein                                                                                      | Cluster0096_High in NALT                 |
| 1422200_at   | Omp                     | olfactory marker protein                                                                                      | Cluster0096_High in NALT                 |
| 1427614_at   | Pip                     | prolactin induced protein                                                                                     | Cluster0096_High in NALT                 |
| 1420347_at   | Plunc                   | palate, lung, and nasal epithelium associated                                                                 | Cluster0096_High in NALT                 |
| 1449927_at   | S100a5                  | S100 calcium binding protein A5                                                                               | Cluster0096_High in NALT                 |
| 1441036_at   | Stoml3                  | stomatin (Epb7.2)-like 3                                                                                      | Cluster0096_High in NALT                 |
| 1447847_x_at | Stoml3                  | stomatin (Epb7.2)-like 3                                                                                      | Cluster0096_High in NALT                 |
| 1420470_at   | Sult1c1                 | sulfotransferase family, cytosolic, 1C, member 1                                                              | Cluster0096_High in NALT                 |
| 1421484_at   | Ugt2a1 /// Ugt2a2       | UDP glucuronosyltransferase 2 family, polypeptide A1 /// UDP glucuronosyltransferase 2 family, polypeptide A2 | Cluster0096_High in NALT                 |
| 1439211_at   | Umodl1                  | uromodulin-like 1                                                                                             | Cluster0096_High in NALT                 |
| 1430423_s_at | 2610528E23Rik /// Pgap2 | RIKEN cDNA 2610528E23 gene /// post-GPI attachment to proteins 2                                              | Cluster0097_House keeping-transcription  |
| 1418584_at   | Ccnh                    | cyclin H                                                                                                      | Cluster0097_House keeping-transcription  |
| 1415816_at   | Cct7                    | chaperonin containing Tcp1, subunit 7 (eta)                                                                   | Cluster0097_House keeping-transcription  |
| 1415817_s_at | Cct7                    | chaperonin containing Tcp1, subunit 7 (eta)                                                                   | Cluster0097_House keeping-transcription  |
| 1416541_at   | Clpb                    | ClpB caseinolytic peptidase B homolog (E. coli)                                                               | Cluster0097_House keeping-transcription  |
| 1419644_at   | Cstf2                   | cleavage stimulation factor, 3 pre-RNA subunit 2                                                              | Cluster0097_House keeping-transcription  |
| 1416557_a_at | Eftud2                  | elongation factor Tu GTP binding domain containing 2                                                          | Cluster0097_House keeping-transcription  |
| 1438835_a_at | Eftud2                  | elongation factor Tu GTP binding domain containing 2                                                          | Cluster0097_House keeping-transcription  |
| 1416100_at   | Eif3d                   | eukaryotic translation initiation factor 3, subunit D                                                         | Cluster0097_House keeping-transcription  |
| 1448192_s_at | Gm5081 /// Prps1        | predicted gene 5081 /// phosphoribosyl pyrophosphate synthetase 1                                             | Cluster0097_House keeping-transcription  |
| 1448884_at   | Gtf2e2                  | general transcription factor II E, polypeptide 2 (beta subunit)                                               | Cluster0097_House keeping-transcription  |
| 1428532_at   | Ints2                   | integrator complex subunit 7                                                                                  | Cluster0097_House keeping-transcription  |
| 1427158_at   | Mrps30                  | mitochondrial ribosomal protein S30                                                                           | Cluster0097_House keeping-transcription  |
| 1417118_a_at | Naa10                   | N(alpha)-acetyltransferase 10, NatA catalytic subunit                                                         | Cluster0097_House keeping-transcription  |
| 1419471_a_at | Nudc                    | nuclear distribution gene C homolog (Aspergillus)                                                             | Cluster0097_House keeping-transcription  |
| 1448277_at   | Pold2                   | polymerase (DNA directed), delta 2, regulatory subunit                                                        | Cluster0097_House keeping-transcription  |
| 1419553_a_at | Rabggtb                 | RAB geranylgeranyl transferase, b subunit                                                                     | Cluster0097_House keeping-transcription  |
| 1448938_at   | Rpa3                    | replication protein A3                                                                                        | Cluster0097_House keeping-transcription  |
| 1423417_at   | Smarcc1                 | SWI/SNF related, matrix associated, actin dependent regulator of chromatin, subfamily c, member 1             | Cluster0097_House keeping-transcription  |
| 1434419_s_at | Tardbp                  | TAR DNA binding protein                                                                                       | Cluster0097_House keeping-transcription  |
| 1418443_at   | Xpo1                    | exportin 1, CRM1 homolog (yeast)                                                                              | Cluster0097_House keeping-transcription  |
| 1460489_at   | 1700097M23Rik           | RIKEN cDNA 1700097M23 gene                                                                                    | Cluster0098_Paneth cell-related          |
| 1454395_at   | 4632404M16Rik           | RIKEN cDNA 4632404M16 gene                                                                                    | Cluster0098_Paneth cell-related          |
| 1432050_at   | 4930571B16Rik           | RIKEN cDNA 4930571B16 gene                                                                                    | Cluster0098_Paneth cell-related          |
| 1442612_at   | C730036E19Rik           | RIKEN cDNA C730036E19 gene                                                                                    | Cluster0098_Paneth cell-related          |
| 1430018_at   | Cdc42ep5                | CDC42 effector protein (Rho GTPase binding) 5                                                                 | Cluster0098_Paneth cell-related          |
| 1447882_x_at | Ddx54                   | DEAD (Asp-Glu-Ala-Asp) box polypeptide 54                                                                     | Cluster0098_Paneth cell-related          |
| 1440182_at   | Fzd10                   | frizzled homolog 10 (Drosophila)                                                                              | Cluster0098_Paneth cell-related          |
| 1456427_at   | Gp1bb                   | Glycoprotein Ib, beta polypeptide                                                                             | Cluster0098_Paneth cell-related          |
| 1446180_at   | Lamb1-1                 | laminin B1 subunit 1                                                                                          | Cluster0098_Paneth cell-related          |
| 1434319_at   | Mdh1                    | malate dehydrogenase 1, NAD (soluble)                                                                         | Cluster0098_Paneth cell-related          |
| 1458223_at   | Mdm4 /// Mdm4-ps        | transformed mouse 3T3 cell double minute 4 /// transformed mouse 3T3 cell double minute 4, pseudogen          | Cluster0098_Paneth cell-related          |
| 1425971_at   | NA                      | ---                                                                                                           | Cluster0098_Paneth cell-related          |
| 1440678_at   | NA                      | ---                                                                                                           | Cluster0098_Paneth cell-related          |
| 1441424_at   | NA                      | ---                                                                                                           | Cluster0098_Paneth cell-related          |
| 1459073_x_at | NA                      | ---                                                                                                           | Cluster0098_Paneth cell-related          |
| 1438939_x_at | Ndn                     | neccin                                                                                                        | Cluster0098_Paneth cell-related          |
| 1421517_at   | St6galnac1              | ST6 (alpha-N-acetyl-neuraminy-2,3-beta-galactosyl-1,3)-N-acetylgalactosaminide alpha-2,6-sialyltransferase    | Cluster0098_Paneth cell-related          |
| 1441490_at   | Tmem39a                 | Transmembrane protein 39a                                                                                     | Cluster0098_Paneth cell-related          |
| 1445251_at   | Tnfsf13b                | tumor necrosis factor (ligand) superfamily, member 13b                                                        | Cluster0098_Paneth cell-related          |
| 1453083_at   | Vmn2r29                 | vomer nasal 2, receptor 29                                                                                    | Cluster0098_Paneth cell-related          |
| 1429969_at   | 4833403J16Rik           | RIKEN cDNA 4833403J16 gene                                                                                    | Cluster0099_High in haematopoietic cells |
| 1440206_at   | A930024E05Rik           | RIKEN cDNA A930024E05 gene                                                                                    | Cluster0099_High in haematopoietic cells |

|              |                        |                                                                           |                                          |
|--------------|------------------------|---------------------------------------------------------------------------|------------------------------------------|
| 1436395_at   | Card6                  | caspase recruitment domain family, member 6                               | Cluster0099_High in haematopoietic cells |
| 1434618_at   | Crebzf                 | CREB/ATF bZIP transcription factor                                        | Cluster0099_High in haematopoietic cells |
| 1424325_at   | Esco1                  | establishment of cohesion 1 homolog 1 ( <i>S. cerevisiae</i> )            | Cluster0099_High in haematopoietic cells |
| 1460555_at   | Fam65b                 | family with sequence similarity 65, member B                              | Cluster0099_High in haematopoietic cells |
| 1455110_at   | Gabpb2                 | GA repeat binding protein, beta 2                                         | Cluster0099_High in haematopoietic cells |
| 1444181_at   | Gimap5                 | GTPase, IMAP family member 5                                              | Cluster0099_High in haematopoietic cells |
| 1456061_at   | Gimap8                 | GTPase, IMAP family member 8                                              | Cluster0099_High in haematopoietic cells |
| 1437756_at   | Gimap9                 | GTPase, IMAP family member 9                                              | Cluster0099_High in haematopoietic cells |
| 1427553_at   | Gm16489                | predicted gene 16489                                                      | Cluster0099_High in haematopoietic cells |
| 1440900_at   | Gpr174                 | G protein-coupled receptor 174                                            | Cluster0099_High in haematopoietic cells |
| 1437436_s_at | Grk6                   | G protein-coupled receptor kinase 6                                       | Cluster0099_High in haematopoietic cells |
| 1452377_at   | MLL1                   | myeloid/lymphoid or mixed-lineage leukemia 1                              | Cluster0099_High in haematopoietic cells |
| 1428479_at   | Nfat1                  | nuclear factor of activated T-cells, cytoplasmic, calcineurin-dependent 1 | Cluster0099_High in haematopoietic cells |
| 1452497_a_at | Nfatc3                 | nuclear factor of activated T-cells, cytoplasmic, calcineurin-dependent 3 | Cluster0099_High in haematopoietic cells |
| 1417585_at   | Nup210                 | nucleoporin 210                                                           | Cluster0099_High in haematopoietic cells |
| 1430025_at   | Ppp3cc                 | protein phosphatase 3, catalytic subunit, gamma isoform                   | Cluster0099_High in haematopoietic cells |
| 1416007_at   | Satb1                  | special AT-rich sequence binding protein 1                                | Cluster0099_High in haematopoietic cells |
| 1419480_at   | Sell                   | selectin, lymphocyte                                                      | Cluster0099_High in haematopoietic cells |
| 1448104_at   | Aldh6a1                | aldehyde dehydrogenase family 6, subfamily A1                             | Cluster0100_High in astrocytes & NALT    |
| 1460167_at   | Aldh7a1                | aldehyde dehydrogenase family 7, member A1                                | Cluster0100_High in astrocytes & NALT    |
| 1417050_at   | C1qtnf4                | C1q and tumor necrosis factor related protein 4                           | Cluster0100_High in astrocytes & NALT    |
| 1454222_a_at | Ccdc13                 | coiled-coil domain containing 13                                          | Cluster0100_High in astrocytes & NALT    |
| 1455055_at   | Ccdc157                | coiled-coil domain containing 157                                         | Cluster0100_High in astrocytes & NALT    |
| 1441107_at   | Dmrta2                 | doublesex and mab-3 related transcription factor like family A2           | Cluster0100_High in astrocytes & NALT    |
| 1423136_at   | Fgf1                   | fibroblast growth factor 1                                                | Cluster0100_High in astrocytes & NALT    |
| 1435115_at   | Fndc5                  | fibronectin type III domain containing 5                                  | Cluster0100_High in astrocytes & NALT    |
| 1453135_at   | Fndc5                  | fibronectin type III domain containing 5                                  | Cluster0100_High in astrocytes & NALT    |
| 1427529_at   | Fzd9                   | frizzled homolog 9 ( <i>Drosophila</i> )                                  | Cluster0100_High in astrocytes & NALT    |
| 1433707_at   | Gabra4                 | gamma-aminobutyric acid (GABA) A receptor, subunit alpha 4                | Cluster0100_High in astrocytes & NALT    |
| 1424030_at   | Grhl1 /// LOC100043996 | grainyhead-like 1 ( <i>Drosophila</i> ) /// similar to Grhl1 protein      | Cluster0100_High in astrocytes & NALT    |
| 1421435_at   | Grid2                  | glutamate receptor, ionotropic, delta 2                                   | Cluster0100_High in astrocytes & NALT    |
| 1448181_at   | Klf15                  | Kruppel-like factor 15                                                    | Cluster0100_High in astrocytes & NALT    |
| 1455216_at   | Paqr6                  | progesterin and adipoQ receptor family member VI                          | Cluster0100_High in astrocytes & NALT    |
| 1416178_a_at | Plekhhb1               | pleckstrin homology domain containing, family B (evectins) member 1       | Cluster0100_High in astrocytes & NALT    |
| 1433691_at   | Ppp1r3c                | protein phosphatase 1, regulatory (inhibitor) subunit 3C                  | Cluster0100_High in astrocytes & NALT    |
| 1435642_at   | Prr18                  | proline rich region 18                                                    | Cluster0100_High in astrocytes & NALT    |
| 1455392_at   | Prr18                  | proline rich region 18                                                    | Cluster0100_High in astrocytes & NALT    |
| 1429567_at   | Rassf10                | Ras association (RalGDS/AF-6) domain family (N-terminal) member 10        | Cluster0100_High in astrocytes & NALT    |
| 1428284_at   | 8430427H17Rik          | RIKEN cDNA 8430427H17 gene                                                | Cluster0101                              |
| 1442944_at   | C76555                 | expressed sequence C76555                                                 | Cluster0101                              |
| 1438503_x_at | Edf1                   | endothelial differentiation-related factor 1                              | Cluster0101                              |
| 1426569_a_at | Frk                    | fyn-related kinase                                                        | Cluster0101                              |
| 1439560_x_at | Gm5480                 | predicted gene 5480                                                       | Cluster0101                              |
| 1436215_at   | Ipmk                   | inositol polyphosphate multikinase                                        | Cluster0101                              |
| 1437856_at   | Ipmk                   | inositol polyphosphate multikinase                                        | Cluster0101                              |
| 1433885_at   | Iqgap2                 | IQ motif containing GTPase activating protein 2                           | Cluster0101                              |
| 1452411_at   | Lrrc1                  | leucine rich repeat containing 1                                          | Cluster0101                              |
| 1417016_at   | Mapkapk5               | MAP kinase-activated protein kinase 5                                     | Cluster0101                              |
| 1437698_at   | Myo5b                  | myosin VB                                                                 | Cluster0101                              |
| 1455520_at   | Ppp2r5c                | protein phosphatase 2, regulatory subunit B (B56), gamma isoform          | Cluster0101                              |
| 1430300_at   | Sco1                   | SCO cytochrome oxidase deficient homolog 1 (yeast)                        | Cluster0101                              |
| 1434473_at   | Slc16a5                | solute carrier family 16 (monocarboxylic acid transporters), member 5     | Cluster0101                              |
| 1457149_at   | Ttc22                  | tetratricopeptide repeat domain 22                                        | Cluster0101                              |
| 1425019_at   | Ubxn2a                 | UBX domain protein 2A                                                     | Cluster0101                              |
| 1426776_at   | Wasl                   | Wiskott-Aldrich syndrome-like (human)                                     | Cluster0101                              |
| 1452193_a_at | Wasl                   | Wiskott-Aldrich syndrome-like (human)                                     | Cluster0101                              |
| 1440348_at   | Zfyve9                 | zinc finger, FYVE domain containing 9                                     | Cluster0101                              |

|              |                                       |                                                                                                                 |             |
|--------------|---------------------------------------|-----------------------------------------------------------------------------------------------------------------|-------------|
| 1424984_at   | 2700078E11Rik                         | RIKEN cDNA 2700078E11 gene                                                                                      | Cluster0102 |
| 1423388_at   | Ap1g1                                 | adaptor protein complex AP-1, gamma 1 subunit                                                                   | Cluster0102 |
| 1454106_a_at | Cxxc1                                 | CXXC finger 1 (PHD domain)                                                                                      | Cluster0102 |
| 1429776_a_at | Dnajb6                                | DnaJ (Hsp40) homolog, subfamily B, member 6                                                                     | Cluster0102 |
| 1427058_at   | Eif4a1                                | eukaryotic translation initiation factor 4A1                                                                    | Cluster0102 |
| 1430980_a_at | Eif4a1                                | eukaryotic translation initiation factor 4A1                                                                    | Cluster0102 |
| 1448879_at   | Gm10145 /// Gm10705 /// Ube2I3        | predicted gene 10145 /// predicted gene 10705 /// ubiquitin-conjugating enzyme E2L :                            | Cluster0102 |
| 1450405_at   | Mrpl19                                | mitochondrial ribosomal protein L19                                                                             | Cluster0102 |
| 1430990_s_at | Mrpl44                                | mitochondrial ribosomal protein L44                                                                             | Cluster0102 |
| 1448781_at   | Nab1                                  | Ngfi-A binding protein 1                                                                                        | Cluster0102 |
| 1418905_at   | Nubp1                                 | nucleotide binding protein 1                                                                                    | Cluster0102 |
| 1430778_a_at | Nubp1                                 | nucleotide binding protein 1                                                                                    | Cluster0102 |
| 1460339_at   | Psma4                                 | proteasome (prosome, macropain) subunit, alpha type 4                                                           | Cluster0102 |
| 1416706_at   | Rpe                                   | ribose-5-phosphate-3-epimerase                                                                                  | Cluster0102 |
| 1431760_a_at | Sdccag3                               | serologically defined colon cancer antigen 3                                                                    | Cluster0102 |
| 1423113_a_at | Ube2d3                                | ubiquitin-conjugating enzyme E2D 3 (UBC4/5 homolog, yeast)                                                      | Cluster0102 |
| 1455480_s_at | Ube2d3                                | ubiquitin-conjugating enzyme E2D 3 (UBC4/5 homolog, yeast)                                                      | Cluster0102 |
| 1451378_at   | Utp6                                  | UTP6, small subunit (SSU) processome component, homolog (yeast)                                                 | Cluster0102 |
| 1422746_s_at | Bicd2                                 | bicaudal D homolog 2 (Drosophila)                                                                               | Cluster0103 |
| 1430452_at   | Cyp20a1                               | cytochrome P450, family 20, subfamily A, polypeptide 1                                                          | Cluster0103 |
| 1433491_at   | Epb4.1l2                              | erythrocyte protein band 4.1-like 2                                                                             | Cluster0103 |
| 1433492_at   | Epb4.1l2                              | erythrocyte protein band 4.1-like 2                                                                             | Cluster0103 |
| 1426918_at   | Irgb1                                 | integrin beta 1 (fibronectin receptor beta)                                                                     | Cluster0103 |
| 1448541_at   | Klc1                                  | kinesin light chain 1                                                                                           | Cluster0103 |
| 1422791_at   | Pafah1b2                              | platelet-activating factor acetylhydrolase, isoform 1b, subunit 2                                               | Cluster0103 |
| 1422792_at   | Pafah1b2                              | platelet-activating factor acetylhydrolase, isoform 1b, subunit 2                                               | Cluster0103 |
| 1422793_at   | Pafah1b2                              | platelet-activating factor acetylhydrolase, isoform 1b, subunit 2                                               | Cluster0103 |
| 1450755_at   | Pafah1b2                              | platelet-activating factor acetylhydrolase, isoform 1b, subunit 2                                               | Cluster0103 |
| 1452759_s_at | Ppfbp1                                | PTPRF interacting protein, binding protein 1 (liprin beta 1)                                                    | Cluster0103 |
| 1453406_a_at | Rab28                                 | RAB28, member RAS oncogene family                                                                               | Cluster0103 |
| 1440904_at   | Senp5                                 | SUMO/sentrin specific peptidase 5                                                                               | Cluster0103 |
| 1426680_at   | Sepn1                                 | selenoprotein N, 1                                                                                              | Cluster0103 |
| 1422854_at   | Shc1                                  | src homology 2 domain-containing transforming protein C1                                                        | Cluster0103 |
| 1448033_at   | Tatdn1                                | TatD DNase domain containing 1                                                                                  | Cluster0103 |
| 1425621_at   | Trim35                                | tripartite motif-containing 35                                                                                  | Cluster0103 |
| 1432367_a_at | Ufd1l                                 | ubiquitin fusion degradation 1 like                                                                             | Cluster0103 |
| 1454013_at   | 1810062O18Rik                         | RIKEN cDNA 1810062O18 gene                                                                                      | Cluster0104 |
| 1450339_a_at | Bcl11b                                | B-cell leukemia/lymphoma 11B                                                                                    | Cluster0104 |
| 1426396_at   | Cd247                                 | CD247 antigen                                                                                                   | Cluster0104 |
| 1452389_at   | Cd27                                  | CD27 antigen                                                                                                    | Cluster0104 |
| 1440217_at   | Fam169b                               | family with sequence similarity 169, member B                                                                   | Cluster0104 |
| 1454893_at   | Fam189b                               | family with sequence similarity 189, member B                                                                   | Cluster0104 |
| 1426772_x_at | Gm6273 /// LOC381765 /// LOC665506 // | predicted gene 6273 /// similar to T cell antigen receptor /// similar to T-cell receptor beta-2 chain C region | Cluster0104 |
| 1452205_x_at | Gm6273 /// LOC381765 /// LOC665506 // | predicted gene 6273 /// similar to T cell antigen receptor /// similar to T-cell receptor beta-2 chain C region | Cluster0104 |
| 1425396_a_at | Lck                                   | lymphocyte protein tyrosine kinase                                                                              | Cluster0104 |
| 1439145_at   | Lck                                   | lymphocyte protein tyrosine kinase                                                                              | Cluster0104 |
| 1425226_x_at | LOC665506                             | similar to T-cell receptor beta-2 chain C region                                                                | Cluster0104 |
| 1425854_x_at | LOC665506                             | similar to T-cell receptor beta-2 chain C region                                                                | Cluster0104 |
| 1433471_at   | Tcf7                                  | transcription factor 7, T-cell specific                                                                         | Cluster0104 |
| 1426159_x_at | Tcrb-J                                | T-cell receptor beta, joining region                                                                            | Cluster0104 |
| 1427184_at   | Tcrb-J                                | T-cell receptor beta, joining region                                                                            | Cluster0104 |
| 1427656_at   | Tcrb-J                                | T-cell receptor beta, joining region                                                                            | Cluster0104 |
| 1427532_at   | Trat1                                 | T cell receptor associated transmembrane adaptor 1                                                              | Cluster0104 |
| 1437561_at   | Trat1                                 | T cell receptor associated transmembrane adaptor 1                                                              | Cluster0104 |
| 1432291_at   | 0610033M10Rik                         | RIKEN cDNA 0610033M10 gene                                                                                      | Cluster0105 |
| 1453643_at   | 1700001L19Rik                         | RIKEN cDNA 1700001L19 gene                                                                                      | Cluster0105 |
| 1430525_at   | 2310001K24Rik                         | RIKEN cDNA 2310001K24 gene                                                                                      | Cluster0105 |

|              |                                            |                                                                                                                |             |
|--------------|--------------------------------------------|----------------------------------------------------------------------------------------------------------------|-------------|
| 1433022_at   | 2310068G24Rik                              | RIKEN cDNA 2310068G24 gene                                                                                     | Cluster0105 |
| 1432994_at   | 2900057E15Rik                              | RIKEN cDNA 2900057E15 gene                                                                                     | Cluster0105 |
| 1438105_at   |                                            | Mar-10 membrane-associated ring finger (C3HC4) 10                                                              | Cluster0105 |
| 1454473_at   | 4933433M23Rik                              | RIKEN cDNA 4933433M23 gene                                                                                     | Cluster0105 |
| 1438136_at   | AstI                                       | astacin-like metalloendopeptidase (M12 family)                                                                 | Cluster0105 |
| 1433456_at   | AU022751                                   | expressed sequence AU022751                                                                                    | Cluster0105 |
| 1440100_at   | Ccdc130                                    | Coiled-coil domain containing 130                                                                              | Cluster0105 |
| 1429925_at   | Clec12b                                    | C-type lectin domain family 12, member B                                                                       | Cluster0105 |
| 1440732_at   | D030018L15Rik                              | nuclear receptor coactivator 2 pseudogene                                                                      | Cluster0105 |
| 1440642_at   | D630042P16Rik                              | RIKEN cDNA D630042P16 gene                                                                                     | Cluster0105 |
| 1431877_a_at | Grhl2                                      | grainyhead-like 2 (Drosophila)                                                                                 | Cluster0105 |
| 1442669_at   | NA                                         | ---                                                                                                            | Cluster0105 |
| 1443067_at   | NA                                         | ---                                                                                                            | Cluster0105 |
| 1443588_at   | NA                                         | ---                                                                                                            | Cluster0105 |
| 1458353_at   | Nwd1                                       | NACHT and WD repeat domain containing 1                                                                        | Cluster0105 |
| 1427851_x_at | AB069917 /// Ighv1-72 /// LOC631518        | cDNA sequence AB069917 /// immunoglobulin heavy variable V1-72 /// similar to Ig heavy chain V-II region       | Cluster0106 |
| 1452463_x_at | Gm10883                                    | predicted gene 10883                                                                                           | Cluster0106 |
| 1426201_at   | Gm1499 /// Gm1524 /// Igv4-71              | predicted gene 1499 /// predicted gene 1524 /// immunoglobulin kappa chain variable 4-7:                       | Cluster0106 |
| 1426200_at   | Gm1524                                     | predicted gene 1524                                                                                            | Cluster0106 |
| 1452536_s_at | Gm5571 /// Igv-V1                          | predicted gene 5571 /// immunoglobulin kappa chain variable 1 (V1)                                             | Cluster0106 |
| 1460423_x_at | Gm5571 /// Igv-V1                          | predicted gene 5571 /// immunoglobulin kappa chain variable 1 (V1)                                             | Cluster0106 |
| 1427576_at   | Gm7202 /// Igv-C /// Igv-V19-14 /// Igv-V: | predicted gene 7202 /// immunoglobulin kappa chain, constant region /// immunoglobulin kappa chain va          | Cluster0106 |
| 1427577_x_at | Gm7202 /// Igv-C /// Igv-V19-14 /// Igv-V: | predicted gene 7202 /// immunoglobulin kappa chain, constant region /// immunoglobulin kappa chain va          | Cluster0106 |
| 1451965_at   | Gm7202 /// Igv-V19-14 /// Igv-V28 /// Igv  | predicted gene 7202 /// immunoglobulin kappa chain variable 19 (V19)-14 /// immunoglobulin kappa chain         | Cluster0106 |
| 1452535_at   | Igh-6                                      | Immunoglobulin heavy chain 6 (heavy chain of IgM)                                                              | Cluster0106 |
| 1451963_at   | Igh-VJ558 /// LOC631129 /// LOC675759      | immunoglobulin heavy chain (J558 family) /// similar to Ig heavy chain V-III region J606 /// similar to Ig hea | Cluster0106 |
| 1451962_at   | Igv-V19-20                                 | immunoglobulin kappa chain variable 19 (V19)-20                                                                | Cluster0106 |
| 1424931_s_at | Igl /// Igl-C1 /// Igl-V1 /// LOC433053    | immunoglobulin lambda chain complex /// immunoglobulin lambda chain, constant region 1 /// immunogl            | Cluster0106 |
| 1430523_s_at | Igl-V1                                     | immunoglobulin lambda chain, variable 1                                                                        | Cluster0106 |
| 1427860_at   | LOC100047162 /// LOC676175                 | similar to immunoglobulin kappa-chain /// similar to Ig kappa chain V-V region MPC11 precursor                 | Cluster0106 |
| 1425738_at   | LOC100047222 /// LOC676193                 | similar to anti-glycoprotein-B of human Cytomegalovirus immunoglobulin VI chain /// similar to Ig kappa ch     | Cluster0106 |
| 1426161_at   | NA                                         | ---                                                                                                            | Cluster0106 |
| 1427857_x_at | NA                                         | ---                                                                                                            | Cluster0106 |
| 1431321_at   | 4930513E20Rik                              | RIKEN cDNA 4930513E20 gene                                                                                     | Cluster0107 |
| 1444071_at   | 9630013A20Rik                              | RIKEN cDNA 9630013A20 gene                                                                                     | Cluster0107 |
| 1422141_s_at | Csprs                                      | component of Sp100-rs                                                                                          | Cluster0107 |
| 1460416_s_at | Csprs /// Gm7582 /// Gm7609 /// LOC100     | component of Sp100-rs /// predicted gene 7582 /// predicted gene 7609 /// similar to HSR /// similar to pu     | Cluster0107 |
| 1438278_a_at | Cwc22                                      | CWC22 spliceosome-associated protein homolog (S. cerevisiae)                                                   | Cluster0107 |
| 1421629_at   | Gabre                                      | gamma-aminobutyric acid (GABA) A receptor, subunit epsilon                                                     | Cluster0107 |
| 1422140_at   | Gm7609                                     | predicted gene 7609                                                                                            | Cluster0107 |
| 1421470_at   | Grpr                                       | gastrin releasing peptide receptor                                                                             | Cluster0107 |
| 1450260_at   | Grpr                                       | gastrin releasing peptide receptor                                                                             | Cluster0107 |
| 1423605_a_at | Mdm2                                       | transformed mouse 3T3 cell double minute 2                                                                     | Cluster0107 |
| 1427718_a_at | Mdm2                                       | transformed mouse 3T3 cell double minute 2                                                                     | Cluster0107 |
| 1457929_at   | Mdm2                                       | transformed mouse 3T3 cell double minute 2                                                                     | Cluster0107 |
| 1425918_at   | NA                                         | ---                                                                                                            | Cluster0107 |
| 1425093_at   | P2rx3                                      | purinergic receptor P2X, ligand-gated ion channel, 3                                                           | Cluster0107 |
| 1458396_at   | P2rx3                                      | purinergic receptor P2X, ligand-gated ion channel, 3                                                           | Cluster0107 |
| 1428805_at   | Slc35e3                                    | solute carrier family 35, member E3                                                                            | Cluster0107 |
| 1452027_a_at | Trp63                                      | transformation related protein 63                                                                              | Cluster0107 |
| 1433266_at   | 2810416A17Rik                              | RIKEN cDNA 2810416A17 gene                                                                                     | Cluster0108 |
| 1441249_at   | 4930403D09Rik                              | RIKEN cDNA 4930403D09 gene                                                                                     | Cluster0108 |
| 1441562_at   | A230048O21Rik                              | RIKEN cDNA A230048O21 gene                                                                                     | Cluster0108 |
| 1445123_at   | Gm11517                                    | Predicted gene 11517                                                                                           | Cluster0108 |
| 1421794_at   | Klrc3                                      | killer cell lectin-like receptor subfamily C, member 3                                                         | Cluster0108 |
| 1436261_at   | NA                                         | ---                                                                                                            | Cluster0108 |
| 1439813_at   | NA                                         | ---                                                                                                            | Cluster0108 |

|              |                    |                                                                                                |             |
|--------------|--------------------|------------------------------------------------------------------------------------------------|-------------|
| 1440488_at   | NA                 | ---                                                                                            | Cluster0108 |
| 1440722_at   | NA                 | ---                                                                                            | Cluster0108 |
| 1441129_at   | NA                 | ---                                                                                            | Cluster0108 |
| 1441346_at   | NA                 | ---                                                                                            | Cluster0108 |
| 1443628_at   | NA                 | ---                                                                                            | Cluster0108 |
| 1446330_at   | NA                 | ---                                                                                            | Cluster0108 |
| 1446551_at   | NA                 | ---                                                                                            | Cluster0108 |
| 1447871_at   | NA                 | ---                                                                                            | Cluster0108 |
| 1457859_at   | NA                 | ---                                                                                            | Cluster0108 |
| 1455327_at   | Senp2              | SUMO/sentrin specific peptidase 2                                                              | Cluster0108 |
| 1441309_at   | Adamts10           | a disintegrin-like and metallopeptidase (reprolysin type) with thrombospondin type 1 motif, 10 | Cluster0109 |
| 1437429_at   | Adamts1            | ADAMTS-like 1                                                                                  | Cluster0109 |
| 1456935_at   | Al606473           | expressed sequence Al606473                                                                    | Cluster0109 |
| 1433147_at   | Cald1              | caldesmon 1                                                                                    | Cluster0109 |
| 1422803_at   | Fstl3              | folliculin-like 3                                                                              | Cluster0109 |
| 1457040_at   | Lgi2               | leucine-rich repeat LGI family, member 2                                                       | Cluster0109 |
| 1427300_at   | Lhx8               | LIM homeobox protein 8                                                                         | Cluster0109 |
| 1452855_at   | Ly6k               | lymphocyte antigen 6 complex, locus K                                                          | Cluster0109 |
| 1443437_at   | NA                 | ---                                                                                            | Cluster0109 |
| 1446894_at   | NA                 | ---                                                                                            | Cluster0109 |
| 1458057_at   | NA                 | ---                                                                                            | Cluster0109 |
| 1447382_at   | Pigt               | phosphatidylinositol glycan anchor biosynthesis, class T                                       | Cluster0109 |
| 1431505_at   | Ppih               | peptidyl prolyl isomerase H                                                                    | Cluster0109 |
| 1454906_at   | Rarb               | retinoic acid receptor, beta                                                                   | Cluster0109 |
| 1418933_at   | Slc1a6             | solute carrier family 1 (high affinity aspartate/glutamate transporter), member 6              | Cluster0109 |
| 1460229_at   | Stag3              | stromal antigen 3                                                                              | Cluster0109 |
| 1429632_at   | Trappc4            | trafficking protein particle complex 4                                                         | Cluster0109 |
| 1433242_at   | 5830415B17Rik      | RIKEN cDNA 5830415B17 gene                                                                     | Cluster0110 |
| 1445588_at   | Ankrd44            | ankyrin repeat domain 44                                                                       | Cluster0110 |
| 1460064_at   | BC028789           | cDNA sequence BC028789                                                                         | Cluster0110 |
| 1459104_at   | Bub3               | budding uninhibited by benzimidazoles 3 homolog ( <i>S. cerevisiae</i> )                       | Cluster0110 |
| 1444340_at   | C230066G23Rik      | RIKEN cDNA C230066G23 gene                                                                     | Cluster0110 |
| 1457064_at   | D030002E05Rik      | RIKEN cDNA D030002E05 gene                                                                     | Cluster0110 |
| 1436487_x_at | Fbxw2              | F-box and WD-40 domain protein 2                                                               | Cluster0110 |
| 1459283_at   | Git2               | G protein-coupled receptor kinase-interactor 2                                                 | Cluster0110 |
| 1433100_at   | Lmf2               | lipase maturation factor 2                                                                     | Cluster0110 |
| 1424850_at   | Map3k1             | mitogen-activated protein kinase kinase kinase 1                                               | Cluster0110 |
| 1429959_at   | NA                 | ---                                                                                            | Cluster0110 |
| 1438353_at   | NA                 | ---                                                                                            | Cluster0110 |
| 1445911_at   | NA                 | ---                                                                                            | Cluster0110 |
| 1458556_at   | NA                 | ---                                                                                            | Cluster0110 |
| 1458741_at   | NA                 | ---                                                                                            | Cluster0110 |
| 1444101_at   | Odf2               | outer dense fiber of sperm tails 2                                                             | Cluster0110 |
| 1430932_at   | Slc9a8             | solute carrier family 9 (sodium/hydrogen exchanger), member 8                                  | Cluster0110 |
| 1450217_at   | Ccl28              | chemokine (C-C motif) ligand 28                                                                | Cluster0111 |
| 1450218_at   | Ccl28              | chemokine (C-C motif) ligand 28                                                                | Cluster0111 |
| 1449091_at   | Cldn8              | claudin 8                                                                                      | Cluster0111 |
| 1448810_at   | Gne                | glucosamine                                                                                    | Cluster0111 |
| 1425182_x_at | Klk1b22 /// Klk1b9 | kallikrein 1-related peptidase b22 /// kallikrein 1-related peptidase b5                       | Cluster0111 |
| 1417687_at   | Lgals12            | lectin, galactose binding, soluble 12                                                          | Cluster0111 |
| 1429833_at   | Ly6g5e             | lymphocyte antigen 6 complex, locus G6E                                                        | Cluster0111 |
| 1423284_at   | Mansc1             | MANSC domain containing 1                                                                      | Cluster0111 |
| 1436021_at   | Mfsd4              | major facilitator superfamily domain containing 4                                              | Cluster0111 |
| 1455531_at   | Mfsd4              | major facilitator superfamily domain containing 4                                              | Cluster0111 |
| 1444238_at   | NA                 | ---                                                                                            | Cluster0111 |
| 1448945_at   | Plip               | plasma membrane proteolipid                                                                    | Cluster0111 |
| 1427343_at   | Rasd2              | RASD family, member 2                                                                          | Cluster0111 |



|                  |                                         |                                                                                                             |             |
|------------------|-----------------------------------------|-------------------------------------------------------------------------------------------------------------|-------------|
| 1429285_at       | Serpina9                                | serine (or cysteine) peptidase inhibitor, clade A (alpha-1 antiproteinase, antitrypsin), member 9           | Cluster0111 |
| 1425606_at       | Slc5a8                                  | solute carrier family 5 (iodide transporter), member 8                                                      | Cluster0111 |
| 1450240_a_at     | Syt11                                   | synaptotagmin-like 1                                                                                        | Cluster0111 |
| 1448609_at       | Tst                                     | thiosulfate sulfurtransferase, mitochondrial                                                                | Cluster0111 |
| 1432487_at       | 4930405H06Rik                           | RIKEN cDNA 4930405H06 gene                                                                                  | Cluster0112 |
| 1453786_at       | 4933430H15Rik                           | RIKEN cDNA 4933430H15 gene                                                                                  | Cluster0112 |
| AFX-b-ActinMur/M | Actb                                    | actin, beta                                                                                                 | Cluster0112 |
| 1437940_at       | Apba1                                   | Amyloid beta (A4) precursor protein binding, family A, member 1                                             | Cluster0112 |
| 1434464_at       | Aqp12                                   | aquaporin 12                                                                                                | Cluster0112 |
| 1455677_s_at     | Clcnka                                  | chloride channel Ka                                                                                         | Cluster0112 |
| 1425401_at       | Cpsf4l                                  | cleavage and polyadenylation specific factor 4-like                                                         | Cluster0112 |
| 1422404_x_at     | Gm12597 /// Gm13280 /// Ifna1 /// Ifna1 | predicted gene 12597 /// predicted gene 13280 /// interferon alpha 1 /// interferon alpha 12 /// interferon | Cluster0112 |
| 1456631_at       | Heatr7b1                                | HEAT repeat containing 7B1                                                                                  | Cluster0112 |
| 1451786_at       | Muc20                                   | mucin 20                                                                                                    | Cluster0112 |
| 1441647_at       | NA                                      | ---                                                                                                         | Cluster0112 |
| 1442600_at       | NA                                      | ---                                                                                                         | Cluster0112 |
| 1447907_x_at     | Necab3                                  | N-terminal EF-hand calcium binding protein 3                                                                | Cluster0112 |
| 1449359_at       | Pax1                                    | paired box gene 1                                                                                           | Cluster0112 |
| 1431168_at       | Six3os1                                 | Six3 opposite strand transcript 1                                                                           | Cluster0112 |
| 1456938_at       | Smarcb1                                 | SWI/SNF related, matrix associated, actin dependent regulator of chromatin, subfamily b, member 1           | Cluster0112 |
| 1440774_x_at     | Wee2                                    | WEE1 homolog 2 (S. pombe)                                                                                   | Cluster0112 |
| 1423934_at       | 1600029D21Rik                           | RIKEN cDNA 1600029D21 gene                                                                                  | Cluster0113 |
| 1431290_at       | 4930588J15Rik                           | RIKEN cDNA 4930588J15 gene                                                                                  | Cluster0113 |
| 1453676_at       | A930041D05Rik                           | RIKEN cDNA A930041D05 gene                                                                                  | Cluster0113 |
| 1430936_at       | Chmp7                                   | CHMP family, member 7                                                                                       | Cluster0113 |
| 1427807_at       | Gm10083                                 | predicted gene 10083                                                                                        | Cluster0113 |
| 1420270_at       | NA                                      | ---                                                                                                         | Cluster0113 |
| 1444914_at       | NA                                      | ---                                                                                                         | Cluster0113 |
| 1446040_at       | NA                                      | ---                                                                                                         | Cluster0113 |
| 1447201_at       | NA                                      | ---                                                                                                         | Cluster0113 |
| 1447790_at       | NA                                      | ---                                                                                                         | Cluster0113 |
| 1458751_at       | NA                                      | ---                                                                                                         | Cluster0113 |
| 1459562_at       | NA                                      | ---                                                                                                         | Cluster0113 |
| 1432486_a_at     | Prss40                                  | protease, serine, 40                                                                                        | Cluster0113 |
| 1459058_at       | Siae                                    | sialic acid acetyltransferase                                                                               | Cluster0113 |
| 1427130_x_at     | Tbata                                   | thymus, brain and testes associated                                                                         | Cluster0113 |
| 1431531_at       | Tex13a                                  | testis expressed 13A                                                                                        | Cluster0113 |
| 1448718_at       | 2400001E08Rik                           | RIKEN cDNA 2400001E08 gene                                                                                  | Cluster0114 |
| 1452599_s_at     | AI413582                                | expressed sequence AI413582                                                                                 | Cluster0114 |
| 1418819_at       | Arl8b                                   | ADP-ribosylation factor-like 8B                                                                             | Cluster0114 |
| 1449622_s_at     | Atp6ap1                                 | ATPase, H+ transporting, lysosomal accessory protein 1                                                      | Cluster0114 |
| 1416392_a_at     | Atp6v0c                                 | ATPase, H+ transporting, lysosomal V0 subunit C                                                             | Cluster0114 |
| 1415671_at       | Atp6v0d1                                | ATPase, H+ transporting, lysosomal V0 subunit D1                                                            | Cluster0114 |
| 1423993_at       | Atp6v1f                                 | ATPase, H+ transporting, lysosomal V1 subunit F                                                             | Cluster0114 |
| 1423255_at       | Atp6v1g1                                | ATPase, H+ transporting, lysosomal V1 subunit G1                                                            | Cluster0114 |
| 1418364_a_at     | Ftl1                                    | ferritin light chain 1                                                                                      | Cluster0114 |
| 1448159_at       | Rab7                                    | RAB7, member RAS oncogene family                                                                            | Cluster0114 |
| 1420148_at       | Slc6a6                                  | solute carrier family 6 (neurotransmitter transporter, taurine), member 6                                   | Cluster0114 |
| 1450129_a_at     | Socs6                                   | suppressor of cytokine signaling 6                                                                          | Cluster0114 |
| 1423573_at       | Srd5a3                                  | steroid 5 alpha-reductase 3                                                                                 | Cluster0114 |
| 1424732_s_at     | Tmem192                                 | transmembrane protein 192                                                                                   | Cluster0114 |
| 1422883_at       | Usp8                                    | ubiquitin specific peptidase 8                                                                              | Cluster0114 |
| 1455873_a_at     | Vps18                                   | vacuolar protein sorting 18 (yeast)                                                                         | Cluster0114 |
| 1416171_at       | 2310037I24Rik                           | RIKEN cDNA 2310037I24 gene                                                                                  | Cluster0115 |
| 1422609_at       | Arpp19                                  | cAMP-regulated phosphoprotein 19                                                                            | Cluster0115 |
| 1421934_at       | Cbx5                                    | chromobox homolog 5 (Drosophila HP1a)                                                                       | Cluster0115 |
| 1450416_at       | Cbx5                                    | chromobox homolog 5 (Drosophila HP1a)                                                                       | Cluster0115 |

|              |                          |                                                                                                                 |             |
|--------------|--------------------------|-----------------------------------------------------------------------------------------------------------------|-------------|
| 1426885_a_at | Cdk2ap1 /// LOC100047490 | CDK2 (cyclin-dependent kinase 2)-associated protein 1 /// similar to putative oral cancer suppressor            | Cluster0115 |
| 1422441_x_at | Cdk4                     | cyclin-dependent kinase 4                                                                                       | Cluster0115 |
| 1422439_a_at | Cdk4 /// LOC640611       | cyclin-dependent kinase 4 /// similar to Cell division protein kinase 4 (Cyclin-dependent kinase 4) (PSK-J3) (( | Cluster0115 |
| 1422440_at   | Cdk4 /// LOC640611       | cyclin-dependent kinase 4 /// similar to Cell division protein kinase 4 (Cyclin-dependent kinase 4) (PSK-J3) (( | Cluster0115 |
| 1428135_a_at | Eef1d                    | eukaryotic translation elongation factor 1 delta (guanine nucleotide exchange protein)                          | Cluster0115 |
| 1422495_a_at | Hmgn1                    | high mobility group nucleosomal binding domain 1                                                                | Cluster0115 |
| 1424466_at   | Ipo9                     | importin 9                                                                                                      | Cluster0115 |
| 1441645_s_at | Ipo9                     | importin 9                                                                                                      | Cluster0115 |
| 1437109_s_at | Lsm6                     | LSM6 homolog, U6 small nuclear RNA associated ( <i>S. cerevisiae</i> )                                          | Cluster0115 |
| 1450914_at   | Ppp1r14b                 | protein phosphatase 1, regulatory (inhibitor) subunit 14B                                                       | Cluster0115 |
| 1433973_at   | Seps1                    | selenophosphate synthetase 1                                                                                    | Cluster0115 |
| 1428560_at   | Xpo5                     | exportin 5                                                                                                      | Cluster0115 |
| 1445457_at   | 9130219A07Rik            | RIKEN cDNA 9130219A07 gene                                                                                      | Cluster0116 |
| 1452138_a_at | Ace2                     | angiotensin I converting enzyme (peptidyl-dipeptidase A) 2                                                      | Cluster0116 |
| 1427357_at   | Cda                      | cytidine deaminase                                                                                              | Cluster0116 |
| 1424528_at   | Cgref1                   | cell growth regulator with EF hand domain 1                                                                     | Cluster0116 |
| 1430172_a_at | Cyp4f16 /// Gm9705       | cytochrome P450, family 4, subfamily f, polypeptide 16 /// predicted gene 9705                                  | Cluster0116 |
| 1425024_at   | E430018J23Rik            | RIKEN cDNA E430018J23 gene                                                                                      | Cluster0116 |
| 1441923_s_at | Edn3                     | endothelin 3                                                                                                    | Cluster0116 |
| 1451392_at   | Elmod3 /// LOC100047355  | ELMO/CED-12 domain containing 3 /// similar to RNA binding motif and ELMO domain 1                              | Cluster0116 |
| 1425463_at   | Gata6                    | GATA binding protein 6                                                                                          | Cluster0116 |
| 1460454_at   | Glod5                    | glyoxalase domain containing 5                                                                                  | Cluster0116 |
| 1428737_s_at | Gramd3                   | GRAM domain containing 3                                                                                        | Cluster0116 |
| 1427480_at   | Leap2                    | liver-expressed antimicrobial peptide 2                                                                         | Cluster0116 |
| 1426572_at   | Me2                      | malic enzyme 2, NAD(+)-dependent, mitochondrial                                                                 | Cluster0116 |
| 1421259_at   | Pk1r                     | pyruvate kinase liver and red blood cell                                                                        | Cluster0116 |
| 1418792_at   | Sh3gl2                   | SH3-domain GRB2-like 2                                                                                          | Cluster0116 |
| 1434191_at   | Tmem195                  | transmembrane protein 195                                                                                       | Cluster0116 |
| 1430195_at   | 2810043O03Rik            | RIKEN cDNA 2810043O03 gene                                                                                      | Cluster0117 |
| 1436652_at   | 5830418K08Rik            | RIKEN cDNA 5830418K08 gene                                                                                      | Cluster0117 |
| 1429883_at   | Actl6a                   | actin-like 6A                                                                                                   | Cluster0117 |
| 1457626_at   | D3Wsu106e                | DNA segment, Chr 3, Wayne State University 106, expressed                                                       | Cluster0117 |
| 1440341_at   | NA                       | ---                                                                                                             | Cluster0117 |
| 1440540_at   | NA                       | ---                                                                                                             | Cluster0117 |
| 1440896_at   | NA                       | ---                                                                                                             | Cluster0117 |
| 1444530_at   | NA                       | ---                                                                                                             | Cluster0117 |
| 1446445_at   | NA                       | ---                                                                                                             | Cluster0117 |
| 1447195_at   | NA                       | ---                                                                                                             | Cluster0117 |
| 1459856_at   | NA                       | ---                                                                                                             | Cluster0117 |
| 1442017_at   | Nfs1                     | nitrogen fixation gene 1 ( <i>S. cerevisiae</i> )                                                               | Cluster0117 |
| 1442731_at   | Pds5a                    | PDS5, regulator of cohesion maintenance, homolog A ( <i>S. cerevisiae</i> )                                     | Cluster0117 |
| 1438065_at   | Rprd1a                   | regulation of nuclear pre-mRNA domain containing 1A                                                             | Cluster0117 |
| 1436587_at   | Wdr38                    | WD repeat domain 38                                                                                             | Cluster0117 |
| 1441763_at   | Zdhhc6                   | zinc finger, DHHC domain containing 6                                                                           | Cluster0117 |
| 1439254_at   | Akap13                   | A kinase (PRKA) anchor protein 13                                                                               | Cluster0118 |
| 1439836_at   | Asb15                    | ankyrin repeat and SOCS box-containing 15                                                                       | Cluster0118 |
| 1441864_x_at | Cenpa                    | centromere protein A                                                                                            | Cluster0118 |
| 1443835_x_at | Fam100b /// Gm7367       | family with sequence similarity 100, member B /// 1110014K08Rik pseudogene                                      | Cluster0118 |
| 1454844_at   | Mchr1                    | melanin-concentrating hormone receptor 1                                                                        | Cluster0118 |
| 1446956_at   | N4bp1                    | NEDD4 binding protein 1                                                                                         | Cluster0118 |
| 1447717_x_at | Nrsn2                    | neurensin 2                                                                                                     | Cluster0118 |
| 1431867_a_at | Pdilt                    | protein disulfide isomerase-like, testis expressed                                                              | Cluster0118 |
| 1425939_at   | Rad50                    | RAD50 homolog ( <i>S. cerevisiae</i> )                                                                          | Cluster0118 |
| 1447793_x_at | Rbx1                     | ring-box 1                                                                                                      | Cluster0118 |
| 1433211_at   | Rptn                     | repetin                                                                                                         | Cluster0118 |
| 1437523_s_at | Sgcg                     | sarcoglycan, gamma (dystrophin-associated glycoprotein)                                                         | Cluster0118 |
| 1439245_at   | Tnrc6a                   | trinucleotide repeat containing 6a                                                                              | Cluster0118 |

|              |               |                                                                                 |             |
|--------------|---------------|---------------------------------------------------------------------------------|-------------|
| 1447518_at   | Tpx2          | TPX2, microtubule-associated protein homolog (Xenopus laevis)                   | Cluster0118 |
| 1447519_x_at | Tpx2          | TPX2, microtubule-associated protein homolog (Xenopus laevis)                   | Cluster0118 |
| 1437961_x_at | Unc119b       | unc-119 homolog B (C. elegans)                                                  | Cluster0118 |
| 1454589_at   | 9430006E15Rik | RIKEN cDNA 9430006E15 gene                                                      | Cluster0119 |
| 1421611_at   | AB041806      | hypothetical protein, MNcb-2457                                                 | Cluster0119 |
| 1427732_s_at | Abcg4         | ATP-binding cassette, sub-family G (WHITE), member 4                            | Cluster0119 |
| 1431778_at   | Cars2         | cysteinyl-tRNA synthetase 2 (mitochondrial)(putative)                           | Cluster0119 |
| 1449611_at   | Cd82          | CD82 antigen                                                                    | Cluster0119 |
| 1444438_at   | Cib3          | calcium and integrin binding family member 3                                    | Cluster0119 |
| 1442968_at   | D9Ert241e     | DNA segment, Chr 9, ERATO Doi 241, expressed                                    | Cluster0119 |
| 1447972_at   | Kcnk15        | potassium channel, subfamily K, member 15                                       | Cluster0119 |
| 1445915_at   | LOC100045318  | similar to HLA-B associated transcript 1                                        | Cluster0119 |
| 1420304_x_at | NA            | ---                                                                             | Cluster0119 |
| 1422251_at   | NA            | ---                                                                             | Cluster0119 |
| 1442515_at   | NA            | ---                                                                             | Cluster0119 |
| 1443228_at   | NA            | ---                                                                             | Cluster0119 |
| 1432219_at   | Nol9          | nucleolar protein 9                                                             | Cluster0119 |
| 1421781_at   | Upk2          | uroplakin 2                                                                     | Cluster0119 |
| 1457035_at   | AI607873      | expressed sequence AI607873                                                     | Cluster0120 |
| 1427736_a_at | Ccr12         | chemokine (C-C motif) receptor-like 2                                           | Cluster0120 |
| 1449858_at   | Cd86          | CD86 antigen                                                                    | Cluster0120 |
| 1418718_at   | Cxcl16        | chemokine (C-X-C motif) ligand 16                                               | Cluster0120 |
| 1449195_s_at | Cxcl16        | chemokine (C-X-C motif) ligand 16                                               | Cluster0120 |
| 1449984_at   | Cxcl2         | chemokine (C-X-C motif) ligand 2                                                | Cluster0120 |
| 1419598_at   | Ms4a6d        | membrane-spanning 4-domains, subfamily A, member 6D                             | Cluster0120 |
| 1419599_s_at | Ms4a6d        | membrane-spanning 4-domains, subfamily A, member 6D                             | Cluster0120 |
| 1422062_at   | Msr1          | macrophage scavenger receptor 1                                                 | Cluster0120 |
| 1425435_at   | Msr1          | macrophage scavenger receptor 1                                                 | Cluster0120 |
| 1448061_at   | Msr1          | macrophage scavenger receptor 1                                                 | Cluster0120 |
| 1438097_at   | Rab20         | RAB20, member RAS oncogene family                                               | Cluster0120 |
| 1429321_at   | Rnf149        | ring finger protein 149                                                         | Cluster0120 |
| 1422010_at   | Tlr7          | toll-like receptor 7                                                            | Cluster0120 |
| 1438855_x_at | Tnfaip2       | tumor necrosis factor, alpha-induced protein 2                                  | Cluster0120 |
| 1427215_at   | Acsm2         | acyl-CoA synthetase medium-chain family member 2                                | Cluster0121 |
| 1427223_a_at | Acsm2         | acyl-CoA synthetase medium-chain family member 2                                | Cluster0121 |
| 1456190_a_at | Acsm2         | acyl-CoA synthetase medium-chain family member 2                                | Cluster0121 |
| 1451030_at   | Akr1c21       | aldo-keto reductase family 1, member C21                                        | Cluster0121 |
| 1417554_at   | Hsd3b4        | hydroxy-delta-5-steroid dehydrogenase, 3 beta- and steroid delta-isomerase 4    | Cluster0121 |
| 1415968_a_at | Kap           | kidney androgen regulated protein                                               | Cluster0121 |
| 1415969_s_at | Kap           | kidney androgen regulated protein                                               | Cluster0121 |
| 1416833_at   | Keg1          | kidney expressed gene 1                                                         | Cluster0121 |
| 1416460_at   | Miox          | myo-inositol oxygenase                                                          | Cluster0121 |
| 1454638_a_at | Pah           | phenylalanine hydroxylase                                                       | Cluster0121 |
| 1424260_at   | Slc12a1       | solute carrier family 12, member 1                                              | Cluster0121 |
| 1418923_at   | Slc17a3       | solute carrier family 17 (sodium phosphate), member 3                           | Cluster0121 |
| 1423279_at   | Slc34a1       | solute carrier family 34 (sodium phosphate), member 1                           | Cluster0121 |
| 1449301_at   | Slc7a13       | solute carrier family 7, (cationic amino acid transporter, y+ system) member 13 | Cluster0121 |
| 1423968_at   | Ugt3a2        | UDP glycosyltransferases 3 family, polypeptide A2                               | Cluster0121 |
| 1434028_at   | Arnt2         | aryl hydrocarbon receptor nuclear translocator 2                                | Cluster0122 |
| 1424945_at   | Chrdl1        | chordin-like 1                                                                  | Cluster0122 |
| 1456722_at   | Chrdl1        | chordin-like 1                                                                  | Cluster0122 |
| 1441165_s_at | Clstn2        | calstentenin 2                                                                  | Cluster0122 |
| 1451019_at   | Ctsf          | cathepsin F                                                                     | Cluster0122 |
| 1455050_at   | E130203B14Rik | RIKEN cDNA E130203B14 gene                                                      | Cluster0122 |
| 1435606_at   | Gal3st4       | galactose-3-O-sulfotransferase 4                                                | Cluster0122 |
| 1416473_a_at | Igdcc4        | immunoglobulin superfamily, DCC subclass, member 4                              | Cluster0122 |
| 1416474_at   | Igdcc4        | immunoglobulin superfamily, DCC subclass, member 4                              | Cluster0122 |

|              |                       |                                                                                     |             |
|--------------|-----------------------|-------------------------------------------------------------------------------------|-------------|
| 1425510_at   | Mark1                 | MAP/microtubule affinity-regulating kinase 1                                        | Cluster0122 |
| 1434632_at   | NA                    | ---                                                                                 | Cluster0122 |
| 1424701_at   | Pcdh20                | protocadherin 20                                                                    | Cluster0122 |
| 1455622_at   | Podxl2                | podocalyxin-like 2                                                                  | Cluster0122 |
| 1429514_at   | Ppap2b                | phosphatidic acid phosphatase type 2B                                               | Cluster0122 |
| 1429638_at   | Wrnip1                | Werner helicase interacting protein 1                                               | Cluster0122 |
| 1434484_at   | 1100001G20Rik         | RIKEN cDNA 1100001G20 gene                                                          | Cluster0123 |
| 1429960_at   | 4930438A08Rik         | RIKEN cDNA 4930438A08 gene                                                          | Cluster0123 |
| 1446715_at   | Abca13                | ATP-binding cassette, sub-family A (ABC1), member 13                                | Cluster0123 |
| 1451079_at   | Adpgk                 | ADP-dependent glucokinase                                                           | Cluster0123 |
| 1443071_at   | AI839979              | expressed sequence AI839979                                                         | Cluster0123 |
| 1424509_at   | Cd177                 | CD177 antigen                                                                       | Cluster0123 |
| 1418907_at   | F5                    | coagulation factor V                                                                | Cluster0123 |
| 1449269_at   | F5                    | coagulation factor V                                                                | Cluster0123 |
| 1425958_at   | Il1f9                 | interleukin 1 family, member 9                                                      | Cluster0123 |
| 1449829_at   | Itgb2l                | integrin beta 2-like                                                                | Cluster0123 |
| 1449366_at   | Mmp8                  | matrix metalloproteinase 8                                                          | Cluster0123 |
| 1455040_s_at | Nhsl2                 | NHS-like 2                                                                          | Cluster0123 |
| 1456765_at   | Nhsl2                 | NHS-like 2                                                                          | Cluster0123 |
| 1422760_at   | Padl4                 | peptidyl arginine deiminase, type IV                                                | Cluster0123 |
| 1444090_at   | Pram1                 | PML-RAR alpha-regulated adaptor molecule 1                                          | Cluster0123 |
| 1434847_at   | Cnmn4                 | cyclin M4                                                                           | Cluster0124 |
| 1428622_at   | Depdc6                | DEP domain containing 6                                                             | Cluster0124 |
| 1419474_a_at | Ehf                   | ets homologous factor                                                               | Cluster0124 |
| 1454681_at   | Esrp1                 | epithelial splicing regulatory protein 1                                            | Cluster0124 |
| 1455915_at   | Galnt4                | UDP-N-acetyl-alpha-D-galactosamine:polypeptide N-acetylgalactosaminyltransferase 4  | Cluster0124 |
| 1426908_at   | Galnt7                | UDP-N-acetyl-alpha-D-galactosamine: polypeptide N-acetylgalactosaminyltransferase 7 | Cluster0124 |
| 1428715_at   | Gfpt1                 | glutamine fructose-6-phosphate transaminase 1                                       | Cluster0124 |
| 1416905_at   | Guca2a                | guanylate cyclase activator 2a (guanylin)                                           | Cluster0124 |
| 1434766_at   | Prkaa2                | protein kinase, AMP-activated, alpha 2 catalytic subunit                            | Cluster0124 |
| 1433645_at   | Slc44a1               | solute carrier family 44, member 1                                                  | Cluster0124 |
| 1423363_at   | Sort1                 | sortilin 1                                                                          | Cluster0124 |
| 1450955_s_at | Sort1                 | sortilin 1                                                                          | Cluster0124 |
| 1420641_a_at | Sqrdl                 | sulfide quinone reductase-like (yeast)                                              | Cluster0124 |
| 1448956_at   | Stard10               | START domain containing 10                                                          | Cluster0124 |
| 1435841_s_at | Suc1g2                | succinate-Coenzyme A ligase, GDP-forming, beta subunit                              | Cluster0124 |
| 1425818_at   | 4930520O04Rik         | RIKEN cDNA 4930520O04 gene                                                          | Cluster0125 |
| 1421605_a_at | Aqp9                  | aquaporin 9                                                                         | Cluster0125 |
| 1422938_at   | Bcl2                  | B-cell leukemia/lymphoma 2                                                          | Cluster0125 |
| 1437122_at   | Bcl2                  | B-cell leukemia/lymphoma 2                                                          | Cluster0125 |
| 1457687_at   | Bcl2                  | B-cell leukemia/lymphoma 2                                                          | Cluster0125 |
| 1460253_at   | Cmtm7                 | CKLF-like MARVEL transmembrane domain containing 7                                  | Cluster0125 |
| 1421936_at   | Dapp1                 | dual adaptor for phosphotyrosine and 3-phosphoinositides 1                          | Cluster0125 |
| 1435264_at   | Emilin2               | elastin microfibril interfacer 2                                                    | Cluster0125 |
| 1422115_a_at | Flt3l                 | FMS-like tyrosine kinase 3 ligand                                                   | Cluster0125 |
| 1424254_at   | Ifitm1                | interferon induced transmembrane protein 1                                          | Cluster0125 |
| 1419120_at   | Lyl1                  | lymphoblastic leukemia 1                                                            | Cluster0125 |
| 1441163_at   | Med12l                | mediator of RNA polymerase II transcription, subunit 12 homolog (yeast)-like        | Cluster0125 |
| 1452530_a_at | Runx1                 | runt related transcription factor 1                                                 | Cluster0125 |
| 1424338_at   | Slc6a13               | solute carrier family 6 (neurotransmitter transporter, GABA), member 13             | Cluster0125 |
| 1419518_at   | Tuba8                 | tubulin, alpha 8                                                                    | Cluster0125 |
| 1418688_at   | Calcr                 | calcitonin receptor                                                                 | Cluster0126 |
| 1428414_at   | Ccny /// LOC100044842 | cyclin Y /// similar to cyclin fold protein 1                                       | Cluster0126 |
| 1450652_at   | Ctsk                  | cathepsin K                                                                         | Cluster0126 |
| 1449954_at   | Hyal1 /// Nat6        | hyaluronoglucosaminidase 1 /// N-acetyltransferase 6                                | Cluster0126 |
| 1437540_at   | Mcoln3                | mucolipin 3                                                                         | Cluster0126 |
| 1450148_at   | Mcoln3                | mucolipin 3                                                                         | Cluster0126 |

|              |               |                                                                                                    |             |
|--------------|---------------|----------------------------------------------------------------------------------------------------|-------------|
| 1416298_at   | Mmp9          | matrix metallopeptidase 9                                                                          | Cluster0126 |
| 1448291_at   | Mmp9          | matrix metallopeptidase 9                                                                          | Cluster0126 |
| 1427015_at   | Nckap5l       | NCK-associated protein 5-like                                                                      | Cluster0126 |
| 1439995_at   | Nhedc2        | Na+/H+ exchanger domain containing 2                                                               | Cluster0126 |
| 1425442_at   | Oscar         | osteoclast associated receptor                                                                     | Cluster0126 |
| 1451710_at   | Oscar         | osteoclast associated receptor                                                                     | Cluster0126 |
| 1418680_at   | Serpind1      | serine (or cysteine) peptidase inhibitor, clade D, member 1                                        | Cluster0126 |
| 1431970_at   | Tm7sf4        | transmembrane 7 superfamily member 4                                                               | Cluster0126 |
| 1443841_x_at | Uap1l1        | UDP-N-acteylglucosamine pyrophosphorylase 1-like 1                                                 | Cluster0126 |
| 1430253_at   | 2900006B11Rik | RIKEN cDNA 2900006B11 gene                                                                         | Cluster0127 |
| 1460515_at   | 8430419K02Rik | RIKEN cDNA 8430419K02 gene                                                                         | Cluster0127 |
| 1441509_at   | A130009I22Rik | RIKEN cDNA A130009I22 gene                                                                         | Cluster0127 |
| 1427242_at   | Ddx4          | DEAD (Asp-Glu-Ala-Asp) box polypeptide 4                                                           | Cluster0127 |
| 1418058_at   | Eltld1        | EGF, latrophilin seven transmembrane domain containing 1                                           | Cluster0127 |
| 1442812_at   | Gm10482       | predicted gene 10482                                                                               | Cluster0127 |
| 1457418_at   | Gm4047        | predicted gene 4047                                                                                | Cluster0127 |
| 1434735_at   | Hlf           | hepatic leukemia factor                                                                            | Cluster0127 |
| 1434736_at   | Hlf           | hepatic leukemia factor                                                                            | Cluster0127 |
| 1455626_at   | Hoxa9         | homeobox A9                                                                                        | Cluster0127 |
| 1420176_x_at | Igll1         | immunoglobulin lambda-like polypeptide 1                                                           | Cluster0127 |
| 1421461_at   | Mpl           | myeloproliferative leukemia virus oncogene                                                         | Cluster0127 |
| 1444525_at   | NA            | ---                                                                                                | Cluster0127 |
| 1428642_at   | Slc35d3       | solute carrier family 35, member D3                                                                | Cluster0127 |
| 1449869_at   | Vpreb1        | pre-B lymphocyte gene 1                                                                            | Cluster0127 |
| 1438475_at   | AB124611      | cDNA sequence AB124611                                                                             | Cluster0128 |
| 1428064_at   | Arap1         | ArfGAP with RhoGAP domain, ankyrin repeat and PH domain 1                                          | Cluster0128 |
| 1427301_at   | Cd48          | CD48 antigen                                                                                       | Cluster0128 |
| 1460437_at   | Cyth4         | cytohesin 4                                                                                        | Cluster0128 |
| 1418508_a_at | Grb2          | growth factor receptor bound protein 2                                                             | Cluster0128 |
| 1449111_a_at | Grb2          | growth factor receptor bound protein 2                                                             | Cluster0128 |
| 1418842_at   | Hcls1         | hematopoietic cell specific Lyn substrate 1                                                        | Cluster0128 |
| 1415983_at   | Lcp1          | lymphocyte cytosolic protein 1                                                                     | Cluster0128 |
| 1451174_at   | Lrrc33        | leucine rich repeat containing 33                                                                  | Cluster0128 |
| 1418465_at   | Ncf4          | neutrophil cytosolic factor 4                                                                      | Cluster0128 |
| 1428786_at   | Nckap1l       | NCK associated protein 1 like                                                                      | Cluster0128 |
| 1428787_at   | Nckap1l       | NCK associated protein 1 like                                                                      | Cluster0128 |
| 1426799_at   | Rab8b         | RAB8B, member RAS oncogene family                                                                  | Cluster0128 |
| 1422572_at   | Rhog          | ras homolog gene family, member G                                                                  | Cluster0128 |
| 1420824_at   | Sema4d        | sema domain, immunoglobulin domain (Ig), transmembrane domain (TM) and short cytoplasmic domain, ( | Cluster0128 |
| 1458493_a_at | 2410089E03Rik | RIKEN cDNA 2410089E03 gene                                                                         | Cluster0129 |
| 1433348_at   | 2810414N06Rik | RIKEN cDNA 2810414N06 gene                                                                         | Cluster0129 |
| 1442391_at   | 4930519H02Rik | RIKEN cDNA 4930519H02 gene                                                                         | Cluster0129 |
| 1431855_at   | 4930570E03Rik | RIKEN cDNA 4930570E03 gene                                                                         | Cluster0129 |
| 1446060_at   | 9230109A22Rik | RIKEN cDNA 9230109A22 gene                                                                         | Cluster0129 |
| 1459893_at   | C76472        | expressed sequence C76472                                                                          | Cluster0129 |
| 1448001_x_at | Cdca3         | cell division cycle associated 3                                                                   | Cluster0129 |
| 1441503_at   | Dcdc2a        | doublecortin domain containing 2a                                                                  | Cluster0129 |
| 1459052_at   | Hif3a         | hypoxia inducible factor 3, alpha subunit                                                          | Cluster0129 |
| 1425715_at   | Il1f8         | interleukin 1 family, member 8                                                                     | Cluster0129 |
| 1444429_at   | Lrtm1         | leucine-rich repeats and transmembrane domains 1                                                   | Cluster0129 |
| 1419825_at   | NA            | ---                                                                                                | Cluster0129 |
| 1420045_at   | NA            | ---                                                                                                | Cluster0129 |
| 1445392_at   | NA            | ---                                                                                                | Cluster0129 |
| 1454529_at   | NA            | ---                                                                                                | Cluster0129 |
| 1435538_at   | 0610030E20Rik | RIKEN cDNA 0610030E20 gene                                                                         | Cluster0130 |
| 1458690_at   | Mar-07        | membrane-associated ring finger (C3HC4) 7                                                          | Cluster0130 |
| 1440974_at   | 9030203C11Rik | RIKEN cDNA 9030203C11 gene                                                                         | Cluster0130 |

|              |                       |                                                                                                   |             |
|--------------|-----------------------|---------------------------------------------------------------------------------------------------|-------------|
| 1430774_at   | A430106A12Rik         | RIKEN cDNA A430106A12 gene                                                                        | Cluster0130 |
| 1438809_at   | Atp5c1                | ATP synthase, H+ transporting, mitochondrial F1 complex, gamma polypeptide 1                      | Cluster0130 |
| 1457580_at   | Chd8                  | chromodomain helicase DNA binding protein 8                                                       | Cluster0130 |
| 1441465_at   | Cnot3                 | CCR4-NOT transcription complex, subunit 3                                                         | Cluster0130 |
| 1460002_at   | LOC100046241 /// Tlk1 | similar to tousled-like kinase 1 /// tousled-like kinase 1                                        | Cluster0130 |
| 1439081_at   | Mgea5                 | meningioma expressed antigen 5 (hyaluronidase)                                                    | Cluster0130 |
| 1442070_at   | MLlt10                | myeloid/lymphoid or mixed-lineage leukemia (trithorax homolog, Drosophila); translocated to, 10   | Cluster0130 |
| 1440259_at   | NA                    | ---                                                                                               | Cluster0130 |
| 1441844_at   | NA                    | ---                                                                                               | Cluster0130 |
| 1446006_at   | NA                    | ---                                                                                               | Cluster0130 |
| 1435253_at   | Rab11b                | RAB11B, member RAS oncogene family                                                                | Cluster0130 |
| 1431067_at   | 2210012G02Rik         | RIKEN cDNA 2210012G02 gene                                                                        | Cluster0131 |
| 1434284_at   | Bdp1                  | B double prime 1, subunit of RNA polymerase III transcription initiation factor IIIB              | Cluster0131 |
| 1427031_s_at | Ccdc52                | coiled-coil domain containing 52                                                                  | Cluster0131 |
| 1421005_at   | Cep110                | centrosomal protein 110                                                                           | Cluster0131 |
| 1456232_at   | Gmeb1                 | glucocorticoid modulatory element binding protein 1                                               | Cluster0131 |
| 1441318_at   | Kdm5a                 | lysine (K)-specific demethylase 5A                                                                | Cluster0131 |
| 1451569_at   | Nr2c2                 | nuclear receptor subfamily 2, group C, member 2                                                   | Cluster0131 |
| 1428474_at   | Ppp3cb                | protein phosphatase 3, catalytic subunit, beta isoform                                            | Cluster0131 |
| 1429810_at   | Rictor                | RPTOR independent companion of MTOR, complex 2                                                    | Cluster0131 |
| 1427333_s_at | Sfrs15                | splicing factor, arginine/serine-rich 15                                                          | Cluster0131 |
| 1426954_at   | Trim33                | tripartite motif-containing 33                                                                    | Cluster0131 |
| 1453034_at   | Zfp251                | zinc finger protein 251                                                                           | Cluster0131 |
| 1441198_at   | Zfp39                 | zinc finger protein 39                                                                            | Cluster0131 |
| 1455291_s_at | Znrf2                 | zinc and ring finger 2                                                                            | Cluster0131 |
| 1427937_at   | 2610030H06Rik         | RIKEN cDNA 2610030H06 gene                                                                        | Cluster0132 |
| 1434233_at   | 2610030H06Rik         | RIKEN cDNA 2610030H06 gene                                                                        | Cluster0132 |
| 1452607_at   | 2610030H06Rik         | RIKEN cDNA 2610030H06 gene                                                                        | Cluster0132 |
| 1422190_at   | C5ar1                 | complement component 5a receptor 1                                                                | Cluster0132 |
| 1439902_at   | C5ar1                 | complement component 5a receptor 1                                                                | Cluster0132 |
| 1448898_at   | Ccl9                  | chemokine (C-C motif) ligand 9                                                                    | Cluster0132 |
| 1422259_a_at | Ccr5                  | chemokine (C-C motif) receptor 5                                                                  | Cluster0132 |
| 1422260_x_at | Ccr5                  | chemokine (C-C motif) receptor 5                                                                  | Cluster0132 |
| 1418944_at   | Cysl1r1               | cysteinyl leukotriene receptor 1                                                                  | Cluster0132 |
| 1449282_at   | Cysl1r1               | cysteinyl leukotriene receptor 1                                                                  | Cluster0132 |
| 1420498_a_at | Dab2                  | disabled homolog 2 (Drosophila)                                                                   | Cluster0132 |
| 1430604_a_at | Dab2                  | disabled homolog 2 (Drosophila)                                                                   | Cluster0132 |
| 1451648_a_at | Folr2                 | folate receptor 2 (fetal)                                                                         | Cluster0132 |
| 1436999_at   | Pid1                  | phosphotyrosine interaction domain containing 1                                                   | Cluster0132 |
| 1428844_a_at | Bclaf1                | BCL2-associated transcription factor 1                                                            | Cluster0133 |
| 1420139_s_at | Krr1                  | KRR1, small subunit (SSU) processome component, homolog (yeast)                                   | Cluster0133 |
| 1435713_at   | Mettl2                | methyltransferase like 2                                                                          | Cluster0133 |
| 1449648_s_at | Polr1c                | polymerase (RNA) I polypeptide C                                                                  | Cluster0133 |
| 1433552_a_at | Polr2b                | polymerase (RNA) II (DNA directed) polypeptide B                                                  | Cluster0133 |
| 1455600_at   | Rps3                  | ribosomal protein S3                                                                              | Cluster0133 |
| 1452710_at   | Rpusd4                | RNA pseudouridylylate synthase domain containing 4                                                | Cluster0133 |
| 1434512_x_at | Sfrs3                 | splicing factor, arginine/serine-rich 3 (SRp20)                                                   | Cluster0133 |
| 1423416_at   | Smarcc1               | SWI/SNF related, matrix associated, actin dependent regulator of chromatin, subfamily c, member 1 | Cluster0133 |
| 1434434_s_at | Tcerg1                | transcription elongation regulator 1 (CA150)                                                      | Cluster0133 |
| 1439464_s_at | Tex10                 | testis expressed gene 10                                                                          | Cluster0133 |
| 1428754_at   | Trmt6                 | tRNA methyltransferase 6 homolog (S. cerevisiae)                                                  | Cluster0133 |
| 1452852_at   | Twistnb               | TWIST neighbor                                                                                    | Cluster0133 |
| 1433746_at   | Wdr3                  | WD repeat domain 3                                                                                | Cluster0133 |
| 1446068_at   | Adk                   | adenosine kinase                                                                                  | Cluster0134 |
| 1446675_at   | Adk                   | adenosine kinase                                                                                  | Cluster0134 |
| 1447985_s_at | Ankib1                | ankyrin repeat and IBR domain containing 1                                                        | Cluster0134 |
| 1420080_a_at | Gfpt1                 | glutamine fructose-6-phosphate transaminase 1                                                     | Cluster0134 |

|              |                                 |                                                                                                           |             |
|--------------|---------------------------------|-----------------------------------------------------------------------------------------------------------|-------------|
| 1441879_x_at | Mkrn1                           | makorin, ring finger protein, 1                                                                           | Cluster0134 |
| 1439175_at   | NA                              | ---                                                                                                       | Cluster0134 |
| 1440624_at   | NA                              | ---                                                                                                       | Cluster0134 |
| 1442615_at   | NA                              | ---                                                                                                       | Cluster0134 |
| 1445980_at   | NA                              | ---                                                                                                       | Cluster0134 |
| 1456960_at   | NA                              | ---                                                                                                       | Cluster0134 |
| 1448481_at   | Neu1                            | neuraminidase 1                                                                                           | Cluster0134 |
| 1428893_at   | Osbp17                          | oxysterol binding protein-like 7                                                                          | Cluster0134 |
| 1431046_at   | Ppfia3                          | protein tyrosine phosphatase, receptor type, f polypeptide (PTPRF), interacting protein (liprin), alpha 3 | Cluster0134 |
| 1429464_at   | Prkaa2                          | protein kinase, AMP-activated, alpha 2 catalytic subunit                                                  | Cluster0134 |
| 1443493_at   | Dhx37                           | DEAH (Asp-Glu-Ala-His) box polypeptide 37                                                                 | Cluster0135 |
| 1438172_x_at | Eri2                            | exoribonuclease 2                                                                                         | Cluster0135 |
| 1435103_x_at | Farsb                           | phenylalanyl-tRNA synthetase, beta subunit                                                                | Cluster0135 |
| 1426741_a_at | Fastkd2                         | FAST kinase domains 2                                                                                     | Cluster0135 |
| 1438319_x_at | Fastkd2                         | FAST kinase domains 2                                                                                     | Cluster0135 |
| 1415916_a_at | Mthfd1                          | methylenetetrahydrofolate dehydrogenase (NADP+ dependent), methenyltetrahydrofolate cyclohydrolase        | Cluster0135 |
| 1436704_x_at | Mthfd1                          | methylenetetrahydrofolate dehydrogenase (NADP+ dependent), methenyltetrahydrofolate cyclohydrolase        | Cluster0135 |
| 1438095_x_at | Noc4l                           | Nucleolar complex associated 4 homolog (S. cerevisiae)                                                    | Cluster0135 |
| 1443794_x_at | Noc4l                           | nucleolar complex associated 4 homolog (S. cerevisiae)                                                    | Cluster0135 |
| 1422128_at   | Rpl14                           | ribosomal protein L14                                                                                     | Cluster0135 |
| 1436856_x_at | Tars2                           | threonyl-tRNA synthetase 2, mitochondrial (putative)                                                      | Cluster0135 |
| 1448102_a_at | Wdr61                           | WD repeat domain 61                                                                                       | Cluster0135 |
| 1458355_x_at | Wdr92                           | WD repeat domain 92                                                                                       | Cluster0135 |
| 1439442_x_at | Yars2                           | tyrosyl-tRNA synthetase 2 (mitochondrial)                                                                 | Cluster0135 |
| 1424685_at   | Exosc4                          | exosome component 4                                                                                       | Cluster0136 |
| 1424514_at   | LOC100045963 /// Rnf126         | similar to Ring finger protein 126 /// ring finger protein 126                                            | Cluster0136 |
| 1423873_at   | Lsm1                            | LSM1 homolog, U6 small nuclear RNA associated (S. cerevisiae)                                             | Cluster0136 |
| 1455951_at   | Mars                            | methionine-tRNA synthetase                                                                                | Cluster0136 |
| 1451278_a_at | Mettl11a                        | methyltransferase like 11A                                                                                | Cluster0136 |
| 1448897_at   | Mkrn2                           | makorin, ring finger protein, 2                                                                           | Cluster0136 |
| 1423823_at   | Mrto4                           | MRT4, mRNA turnover 4, homolog (S. cerevisiae)                                                            | Cluster0136 |
| 1454888_at   | Pfdn4                           | prefoldin 4                                                                                               | Cluster0136 |
| 1460541_at   | Slc7a6                          | solute carrier family 7 (cationic amino acid transporter, y+ system), member 6                            | Cluster0136 |
| 1437464_at   | Spata7                          | spermatogenesis associated 7                                                                              | Cluster0136 |
| 1421260_a_at | Srm                             | spermidine synthase                                                                                       | Cluster0136 |
| 1455456_a_at | Timm50                          | translocase of inner mitochondrial membrane 50 homolog (yeast)                                            | Cluster0136 |
| 1453370_at   | Troap                           | trophinin associated protein                                                                              | Cluster0136 |
| 1452698_at   | Tsfm                            | Ts translation elongation factor, mitochondrial                                                           | Cluster0136 |
| 1429818_at   | 2410012M07Rik                   | RIKEN cDNA 2410012M07 gene                                                                                | Cluster0137 |
| 1430273_at   | 2410087M07Rik                   | RIKEN cDNA 2410087M07 gene                                                                                | Cluster0137 |
| 1457000_at   | BC060267                        | cDNA sequence BC060267                                                                                    | Cluster0137 |
| 1441279_at   | C430002E04Rik                   | RIKEN cDNA C430002E04 gene                                                                                | Cluster0137 |
| 1425312_s_at | Cpsf4l                          | cleavage and polyadenylation specific factor 4-like                                                       | Cluster0137 |
| 1444648_at   | Fam178b                         | family with sequence similarity 178, member B                                                             | Cluster0137 |
| 1435610_at   | Fam19a4                         | family with sequence similarity 19, member A4                                                             | Cluster0137 |
| 1422213_s_at | Foxh1                           | forkhead box H1                                                                                           | Cluster0137 |
| 1459089_at   | Gm11756 /// Gm11757 /// Gm13871 | predicted gene 11756 /// predicted gene 11757 /// predicted gene 13871                                    | Cluster0137 |
| 1456804_at   | Gm6792                          | predicted gene 6792                                                                                       | Cluster0137 |
| 1458687_at   | Gm9564                          | predicted gene 9564                                                                                       | Cluster0137 |
| 1451857_a_at | Notum                           | notum pectinacetyltransferase homolog (Drosophila)                                                        | Cluster0137 |
| 1432503_a_at | Pdcl2                           | phosducin-like 2                                                                                          | Cluster0137 |
| 1425709_at   | Rnf17                           | ring finger protein 17                                                                                    | Cluster0137 |
| 1417381_at   | C1qa                            | complement component 1, q subcomponent, alpha polypeptide                                                 | Cluster0138 |
| 1417063_at   | C1qb                            | complement component 1, q subcomponent, beta polypeptide                                                  | Cluster0138 |
| 1434366_x_at | C1qb                            | complement component 1, q subcomponent, beta polypeptide                                                  | Cluster0138 |
| 1437726_x_at | C1qb                            | complement component 1, q subcomponent, beta polypeptide                                                  | Cluster0138 |
| 1449401_at   | C1qc                            | complement component 1, q subcomponent, C chain                                                           | Cluster0138 |

|              |                         |                                                                |             |
|--------------|-------------------------|----------------------------------------------------------------|-------------|
| 1452279_at   | Cfp                     | complement factor properdin                                    | Cluster0138 |
| 1419872_at   | Csf1r                   | colony stimulating factor 1 receptor                           | Cluster0138 |
| 1419873_s_at | Csf1r                   | colony stimulating factor 1 receptor                           | Cluster0138 |
| 1423593_a_at | Csf1r                   | colony stimulating factor 1 receptor                           | Cluster0138 |
| 1430447_a_at | Lair1                   | leukocyte-associated Ig-like receptor 1                        | Cluster0138 |
| 1450430_at   | Mrc1                    | mannose receptor, C type 1                                     | Cluster0138 |
| 1424754_at   | Ms4a7                   | membrane-spanning 4-domains, subfamily A, member 7             | Cluster0138 |
| 1457322_at   | NA                      | ---                                                            | Cluster0138 |
| 1425214_at   | P2ry6                   | pyrimidinergic receptor P2Y, G-protein coupled, 6              | Cluster0138 |
| 1437285_at   | 1110020G09Rik           | RIKEN cDNA 1110020G09 gene                                     | Cluster0139 |
| 1437286_x_at | 1110020G09Rik           | RIKEN cDNA 1110020G09 gene                                     | Cluster0139 |
| 1430182_a_at | 1700006J14Rik           | RIKEN cDNA 1700006J14 gene                                     | Cluster0139 |
| 1437263_at   | A730089K16Rik           | RIKEN cDNA A730089K16 gene                                     | Cluster0139 |
| 1449818_at   | Abcb4                   | ATP-binding cassette, sub-family B (MDR/TAP), member 4         | Cluster0139 |
| 1420468_at   | Asb17                   | ankyrin repeat and SOCS box-containing 17                      | Cluster0139 |
| 1439739_at   | LOC100047259 /// Prss50 | similar to 1700112C13Rik protein /// protease, serine, 50      | Cluster0139 |
| 1446398_at   | LOC4333197              | hypothetical gene supported by AK028463                        | Cluster0139 |
| 1429750_at   | Minpp1                  | multiple inositol polyphosphate histidine phosphatase 1        | Cluster0139 |
| 1455787_x_at | Minpp1                  | multiple inositol polyphosphate histidine phosphatase 1        | Cluster0139 |
| 1424899_at   | Nmnat3                  | nicotinamide nucleotide adenyltransferase 3                    | Cluster0139 |
| 1451239_a_at | Slc26a1                 | solute carrier family 26 (sulfate transporter), member 1       | Cluster0139 |
| 1444769_at   | Tex9                    | Testis expressed gene 9                                        | Cluster0139 |
| 1428795_at   | 1110021L09Rik           | RIKEN cDNA 1110021L09 gene                                     | Cluster0140 |
| 1429292_a_at | 2310046K01Rik           | RIKEN cDNA 2310046K01 gene                                     | Cluster0140 |
| 1453397_at   | 9130016M20Rik           | RIKEN cDNA 9130016M20 gene                                     | Cluster0140 |
| 1436689_a_at | Aldh9a1                 | aldehyde dehydrogenase 9, subfamily A1                         | Cluster0140 |
| 1437398_a_at | Aldh9a1                 | aldehyde dehydrogenase 9, subfamily A1                         | Cluster0140 |
| 1452614_at   | Bcl2l15                 | BCL2-like 15                                                   | Cluster0140 |
| 1439186_at   | Bend7                   | BEN domain containing 7                                        | Cluster0140 |
| 1427308_at   | Dab1                    | disabled homolog 1 (Drosophila)                                | Cluster0140 |
| 1416752_at   | Ldb3                    | LIM domain binding 3                                           | Cluster0140 |
| 1441102_at   | Prlr                    | prolactin receptor                                             | Cluster0140 |
| 1418486_at   | Vnn1                    | vanin 1                                                        | Cluster0140 |
| 1447845_s_at | Vnn1                    | vanin 1                                                        | Cluster0140 |
| 1417805_at   | Xpnpep2                 | X-prolyl aminopeptidase (aminopeptidase P) 2, membrane-bound   | Cluster0140 |
| 1427501_at   | 4922501L14Rik           | RIKEN cDNA 4922501L14 gene                                     | Cluster0141 |
| 1429602_at   | Cd164l2                 | CD164 sialomucin-like 2                                        | Cluster0141 |
| 1443664_s_at | Cd164l2                 | CD164 sialomucin-like 2                                        | Cluster0141 |
| 1435050_at   | D10Bwg1379e             | DNA segment, Chr 10, Brigham & Women s Genetics 1379 expressed | Cluster0141 |
| 1432556_a_at | Fam183b                 | family with sequence similarity 183, member B                  | Cluster0141 |
| 1418953_at   | Fbxo16                  | F-box protein 16                                               | Cluster0141 |
| 1433727_at   | Glb1l2                  | galactosidase, beta 1-like 2                                   | Cluster0141 |
| 1435650_at   | Hapln4                  | hyaluronan and proteoglycan link protein 4                     | Cluster0141 |
| 1425679_a_at | Mapk8ip1                | mitogen-activated protein kinase 8 interacting protein 1       | Cluster0141 |
| 1439906_at   | NA                      | ---                                                            | Cluster0141 |
| 1417708_at   | Syt3                    | synaptotagmin III                                              | Cluster0141 |
| 1435763_at   | Tbc1d16                 | TBC1 domain family, member 16                                  | Cluster0141 |
| 1434095_at   | Unc5a                   | unc-5 homolog A (C. elegans)                                   | Cluster0141 |
| 1431580_at   | 4833421K07Rik           | RIKEN cDNA 4833421K07 gene                                     | Cluster0142 |
| 1431846_at   | 4930546C10Rik           | RIKEN cDNA 4930546C10 gene                                     | Cluster0142 |
| 1431876_at   | 4931429P17Rik           | RIKEN cDNA 4931429P17 gene                                     | Cluster0142 |
| 1420006_at   | Bmp15                   | Bone morphogenetic protein 15                                  | Cluster0142 |
| 1454372_at   | Cd80                    | CD80 antigen                                                   | Cluster0142 |
| 1447642_x_at | Dmwd                    | dystrophia myotonia-containing WD repeat motif                 | Cluster0142 |
| 1425438_at   | NA                      | ---                                                            | Cluster0142 |
| 1446717_at   | NA                      | ---                                                            | Cluster0142 |
| 1446833_at   | NA                      | ---                                                            | Cluster0142 |



|              |                     |                                                                                                       |             |
|--------------|---------------------|-------------------------------------------------------------------------------------------------------|-------------|
| 1458651_at   | NA                  | ---                                                                                                   | Cluster0142 |
| 1459699_at   | NA                  | ---                                                                                                   | Cluster0142 |
| 1430998_at   | Sqrdl               | sulfide quinone reductase-like (yeast)                                                                | Cluster0142 |
| 1447660_at   | Tbl3                | transducin (beta)-like 3                                                                              | Cluster0142 |
| 1438880_at   | 1700012D14Rik       | RIKEN cDNA 1700012D14 gene                                                                            | Cluster0143 |
| 1444348_at   | Apobec2             | apolipoprotein B mRNA editing enzyme, catalytic polypeptide 2                                         | Cluster0143 |
| 1458915_at   | C77949              | expressed sequence C77949                                                                             | Cluster0143 |
| 1444714_at   | Dcdc2b              | Predicted gene 12964                                                                                  | Cluster0143 |
| 1440157_at   | NA                  | ---                                                                                                   | Cluster0143 |
| 1440996_at   | NA                  | ---                                                                                                   | Cluster0143 |
| 1444920_at   | NA                  | ---                                                                                                   | Cluster0143 |
| 1456157_at   | NA                  | ---                                                                                                   | Cluster0143 |
| 1457345_at   | NA                  | ---                                                                                                   | Cluster0143 |
| 1457618_at   | NA                  | ---                                                                                                   | Cluster0143 |
| 1458628_at   | NA                  | ---                                                                                                   | Cluster0143 |
| 1429222_at   | Pus3                | pseudouridine synthase 3                                                                              | Cluster0143 |
| 1427999_at   | Snapc5              | small nuclear RNA activating complex, polypeptide 5                                                   | Cluster0143 |
| 1425519_a_at | Cd74                | CD74 antigen (invariant polypeptide of major histocompatibility complex, class II antigen-associated) | Cluster0144 |
| 1447075_at   | Ciita               | Class II transactivator                                                                               | Cluster0144 |
| 1435290_x_at | H2-Aa               | histocompatibility 2, class II antigen A, alpha                                                       | Cluster0144 |
| 1438858_x_at | H2-Aa               | histocompatibility 2, class II antigen A, alpha                                                       | Cluster0144 |
| 1443783_x_at | H2-Aa               | histocompatibility 2, class II antigen A, alpha                                                       | Cluster0144 |
| 1452431_s_at | H2-Aa               | histocompatibility 2, class II antigen A, alpha                                                       | Cluster0144 |
| 1425477_x_at | H2-Ab1              | histocompatibility 2, class II antigen A, beta 1                                                      | Cluster0144 |
| 1450648_s_at | H2-Ab1              | histocompatibility 2, class II antigen A, beta 1                                                      | Cluster0144 |
| 1451721_a_at | H2-Ab1              | histocompatibility 2, class II antigen A, beta 1                                                      | Cluster0144 |
| 1422527_at   | H2-DMA              | histocompatibility 2, class II, locus DMA                                                             | Cluster0144 |
| 1418638_at   | H2-DMb1 /// H2-DMb2 | histocompatibility 2, class II, locus Mb1 /// histocompatibility 2, class II, locus Mb2               | Cluster0144 |
| 1449580_s_at | H2-DMb1 /// H2-DMb2 | histocompatibility 2, class II, locus Mb1 /// histocompatibility 2, class II, locus Mb2               | Cluster0144 |
| 1417025_at   | H2-Eb1              | histocompatibility 2, class II antigen E beta                                                         | Cluster0144 |
| 1447372_at   | Aldh16a1            | aldehyde dehydrogenase 16 family, member A1                                                           | Cluster0145 |
| 1430681_at   | Cryl1               | crystallin, lambda 1                                                                                  | Cluster0145 |
| 1442864_at   | Esrra               | estrogen related receptor, alpha                                                                      | Cluster0145 |
| 1458172_at   | Me2                 | malic enzyme 2, NAD(+)-dependent, mitochondrial                                                       | Cluster0145 |
| 1441155_at   | NA                  | ---                                                                                                   | Cluster0145 |
| 1445892_at   | NA                  | ---                                                                                                   | Cluster0145 |
| 1446139_at   | NA                  | ---                                                                                                   | Cluster0145 |
| 1457141_at   | NA                  | ---                                                                                                   | Cluster0145 |
| 1457821_at   | NA                  | ---                                                                                                   | Cluster0145 |
| 1457991_at   | NA                  | ---                                                                                                   | Cluster0145 |
| 1459293_at   | NA                  | ---                                                                                                   | Cluster0145 |
| 1459409_at   | NA                  | ---                                                                                                   | Cluster0145 |
| 1445632_at   | Ogdh                | oxoglutarate dehydrogenase (lipoamide)                                                                | Cluster0145 |
| 1439331_at   | 4932439E07Rik       | RIKEN cDNA 4932439E07 gene                                                                            | Cluster0146 |
| 1418771_a_at | Cpb2                | carboxypeptidase B2 (plasma)                                                                          | Cluster0146 |
| 1423320_at   | Dnase1l2            | deoxyribonuclease 1-like 2                                                                            | Cluster0146 |
| 1450936_a_at | Dnase1l2            | deoxyribonuclease 1-like 2                                                                            | Cluster0146 |
| 1456229_at   | Hoxb3               | homeobox B3                                                                                           | Cluster0146 |
| 1460614_at   | Mier3               | mesoderm induction early response 1, family member 3                                                  | Cluster0146 |
| 1445402_at   | NA                  | ---                                                                                                   | Cluster0146 |
| 1445959_at   | NA                  | ---                                                                                                   | Cluster0146 |
| 1447155_at   | NA                  | ---                                                                                                   | Cluster0146 |
| 1455528_at   | NA                  | ---                                                                                                   | Cluster0146 |
| 1456348_x_at | Pagr5               | progesterone and adipoQ receptor family member V                                                      | Cluster0146 |
| 1440201_at   | Slc8a1              | solute carrier family 8 (sodium/calcium exchanger), member 1                                          | Cluster0146 |
| 1454161_s_at | 0610007P14Rik       | RIKEN cDNA 0610007P14 gene                                                                            | Cluster0147 |
| 1422533_at   | Cyp51               | cytochrome P450, family 51                                                                            | Cluster0147 |

|              |               |                                                                                              |             |
|--------------|---------------|----------------------------------------------------------------------------------------------|-------------|
| 1450646_at   | Cyp51         | cytochrome P450, family 51                                                                   | Cluster0147 |
| 1438322_x_at | Fdft1         | farnesyl diphosphate farnesyl transferase 1                                                  | Cluster0147 |
| 1448130_at   | Fdft1         | farnesyl diphosphate farnesyl transferase 1                                                  | Cluster0147 |
| 1433444_at   | Hmgcs1        | 3-hydroxy-3-methylglutaryl-Coenzyme A synthase 1                                             | Cluster0147 |
| 1433445_x_at | Hmgcs1        | 3-hydroxy-3-methylglutaryl-Coenzyme A synthase 1                                             | Cluster0147 |
| 1433446_at   | Hmgcs1        | 3-hydroxy-3-methylglutaryl-Coenzyme A synthase 1                                             | Cluster0147 |
| 1451122_at   | Idi1          | isopentenyl-diphosphate delta isomerase                                                      | Cluster0147 |
| 1416222_at   | Nsdhl         | NAD(P) dependent steroid dehydrogenase-like                                                  | Cluster0147 |
| 1423078_a_at | Sc4mol        | sterol-C4-methyl oxidase-like                                                                | Cluster0147 |
| 1415993_at   | Sqle          | squalene epoxidase                                                                           | Cluster0147 |
| 1427063_at   | 5330417C22Rik | RIKEN cDNA 5330417C22 gene                                                                   | Cluster0148 |
| 1442113_at   | 5330417C22Rik | RIKEN cDNA 5330417C22 gene                                                                   | Cluster0148 |
| 1424218_a_at | Creb3l4       | cAMP responsive element binding protein 3-like 4                                             | Cluster0148 |
| 1450869_at   | Fgf1          | fibroblast growth factor 1                                                                   | Cluster0148 |
| 1417588_at   | Galnt3        | UDP-N-acetyl-alpha-D-galactosamine:polypeptide N-acetylgalactosaminyltransferase 3           | Cluster0148 |
| 1445838_at   | NA            | ---                                                                                          | Cluster0148 |
| 1424612_at   | Nipal2        | NIPA-like domain containing 2                                                                | Cluster0148 |
| 1418891_a_at | Rab3d         | RAB3D, member RAS oncogene family                                                            | Cluster0148 |
| 1449259_at   | Rab3d         | RAB3D, member RAS oncogene family                                                            | Cluster0148 |
| 1428443_a_at | Rap1gap       | Rap1 GTPase-activating protein                                                               | Cluster0148 |
| 1420334_at   | Slc12a8       | solute carrier family 12 (potassium/chloride transporters), member 8                         | Cluster0148 |
| 1450220_a_at | Spdef         | SAM pointed domain containing ets transcription factor                                       | Cluster0148 |
| 1438061_at   | 4930523C07Rik | RIKEN cDNA 4930523C07 gene                                                                   | Cluster0149 |
| 1456446_at   | 4930523C07Rik | RIKEN cDNA 4930523C07 gene                                                                   | Cluster0149 |
| 1459962_at   | 4930523C07Rik | RIKEN cDNA 4930523C07 gene                                                                   | Cluster0149 |
| 1439582_at   | Macf1         | Microtubule-actin crosslinking factor 1                                                      | Cluster0149 |
| 1443027_at   | NA            | ---                                                                                          | Cluster0149 |
| 1444188_at   | NA            | ---                                                                                          | Cluster0149 |
| 1456553_at   | NA            | ---                                                                                          | Cluster0149 |
| 1456648_at   | NA            | ---                                                                                          | Cluster0149 |
| 1459376_at   | NA            | ---                                                                                          | Cluster0149 |
| 1439631_at   | Zcchc11       | zinc finger, CCHC domain containing 11                                                       | Cluster0149 |
| 1441359_at   | Zcchc11       | zinc finger, CCHC domain containing 11                                                       | Cluster0149 |
| 1456668_at   | Zcchc11       | zinc finger, CCHC domain containing 11                                                       | Cluster0149 |
| 1453618_at   | 4933424N20Rik | RIKEN cDNA 4933424N20 gene                                                                   | Cluster0150 |
| 1431905_s_at | 4933427G17Rik | RIKEN cDNA 4933427G17 gene                                                                   | Cluster0150 |
| 1441113_at   | A430071A18Rik | RIKEN cDNA A430071A18 gene                                                                   | Cluster0150 |
| 1446374_at   | Arhgef10      | Rho guanine nucleotide exchange factor (GEF) 10                                              | Cluster0150 |
| 1432391_at   | Ccdc21        | coiled-coil domain containing 21                                                             | Cluster0150 |
| 1420589_at   | Has3          | hyaluronan synthase 3                                                                        | Cluster0150 |
| 1420741_x_at | Lce1i         | late cornified envelope 1l                                                                   | Cluster0150 |
| 1442564_at   | NA            | ---                                                                                          | Cluster0150 |
| 1449287_at   | Srms          | src-related kinase lacking C-terminal regulatory tyrosine and N-terminal myristylation sites | Cluster0150 |
| 1450281_a_at | Tbata         | thymus, brain and testes associated                                                          | Cluster0150 |
| 1456963_at   | Tmem214       | transmembrane protein 214                                                                    | Cluster0150 |
| 1421458_at   | Zfp112        | zinc finger protein 112                                                                      | Cluster0150 |
| 1430904_at   | Arfgap3       | ADP-ribosylation factor GTPase activating protein 3                                          | Cluster0151 |
| 1440536_at   | NA            | ---                                                                                          | Cluster0151 |
| 1442630_at   | NA            | ---                                                                                          | Cluster0151 |
| 1443341_at   | NA            | ---                                                                                          | Cluster0151 |
| 1443509_at   | NA            | ---                                                                                          | Cluster0151 |
| 1444258_at   | NA            | ---                                                                                          | Cluster0151 |
| 1456346_at   | NA            | ---                                                                                          | Cluster0151 |
| 1457364_at   | NA            | ---                                                                                          | Cluster0151 |
| 1459442_at   | NA            | ---                                                                                          | Cluster0151 |
| 1431140_at   | Them4         | thioesterase superfamily member 4                                                            | Cluster0151 |
| 1426997_at   | Thra          | thyroid hormone receptor alpha                                                               | Cluster0151 |

|              |                                       |                                                                                                           |             |
|--------------|---------------------------------------|-----------------------------------------------------------------------------------------------------------|-------------|
| 1430130_at   | Vwce                                  | von Willebrand factor C and EGF domains                                                                   | Cluster0151 |
| 1454258_at   | 1110008E08Rik                         | RIKEN cDNA 1110008E08 gene                                                                                | Cluster0152 |
| 1443765_at   | 1810058N05Rik                         | RIKEN cDNA 1810058N05 gene                                                                                | Cluster0152 |
| 1431866_at   | 4930425K24Rik                         | RIKEN cDNA 4930425K24 gene                                                                                | Cluster0152 |
| 1439194_at   | C030048H21Rik                         | RIKEN cDNA C030048H21 gene                                                                                | Cluster0152 |
| 1444407_at   | Crebl2                                | CAMP responsive element binding protein-like 2                                                            | Cluster0152 |
| 1443582_at   | Gas2l2                                | growth arrest-specific 2 like 2                                                                           | Cluster0152 |
| 1441851_x_at | Ly6g6c                                | lymphocyte antigen 6 complex, locus G6C                                                                   | Cluster0152 |
| 1420556_at   | Oxt                                   | oxytocin                                                                                                  | Cluster0152 |
| 1456465_at   | Slc25a44                              | solute carrier family 25, member 44                                                                       | Cluster0152 |
| 1424985_a_at | Sox10                                 | SRY-box containing gene 10                                                                                | Cluster0152 |
| 1450585_at   | Tas2r119                              | taste receptor, type 2, member 119                                                                        | Cluster0152 |
| 1457433_x_at | Zfp120                                | zinc finger protein 120                                                                                   | Cluster0152 |
| 1436231_at   | 2900052N01Rik                         | RIKEN cDNA 2900052N01 gene                                                                                | Cluster0153 |
| 1457495_at   | 2900052N01Rik                         | RIKEN cDNA 2900052N01 gene                                                                                | Cluster0153 |
| 1444537_at   | AI429363                              | expressed sequence AI429363                                                                               | Cluster0153 |
| 1444987_at   | Ctsb                                  | cathepsin B                                                                                               | Cluster0153 |
| 1450424_a_at | Il18bp                                | interleukin 18 binding protein                                                                            | Cluster0153 |
| 1420282_s_at | LOC100047285 /// Prss29               | similar to implantation serine proteinase 2 /// protease, serine, 29                                      | Cluster0153 |
| 1439872_at   | NA                                    | ---                                                                                                       | Cluster0153 |
| 1458045_at   | NA                                    | ---                                                                                                       | Cluster0153 |
| 1446536_at   | Sema6d                                | sema domain, transmembrane domain (TM), and cytoplasmic domain, (semaphorin) 6D                           | Cluster0153 |
| 1449134_s_at | Spic                                  | Spi-C transcription factor (Spi-1/PU.1 related)                                                           | Cluster0153 |
| 1426588_at   | Tspan10                               | tetraspanin 10                                                                                            | Cluster0153 |
| 1436003_at   | Vcam1                                 | Vascular cell adhesion molecule 1                                                                         | Cluster0153 |
| 1425269_at   | Apbb1ip                               | amyloid beta (A4) precursor protein-binding, family B, member 1 interacting protein                       | Cluster0154 |
| 1458429_at   | Arhgap30                              | Rho GTPase activating protein 30                                                                          | Cluster0154 |
| 1450155_at   | Itga4                                 | integrin alpha 4                                                                                          | Cluster0154 |
| 1448160_at   | Lcp1                                  | lymphocyte cytosolic protein 1                                                                            | Cluster0154 |
| 1425598_a_at | LOC676654 /// Lyn                     | similar to Yamaguchi sarcoma viral (v-yes-1) oncogene homolog /// Yamaguchi sarcoma viral (v-yes-1) onco  | Cluster0154 |
| 1425609_at   | Ncf1                                  | neutrophil cytosolic factor 1                                                                             | Cluster0154 |
| 1451767_at   | Ncf1                                  | neutrophil cytosolic factor 1                                                                             | Cluster0154 |
| 1448561_at   | Ncf2                                  | neutrophil cytosolic factor 2                                                                             | Cluster0154 |
| 1442927_at   | Ptk2b                                 | PTK2 protein tyrosine kinase 2 beta                                                                       | Cluster0154 |
| 1460224_at   | Snx2                                  | sorting nexin 2                                                                                           | Cluster0154 |
| 1451821_a_at | Sp100                                 | nuclear antigen Sp100                                                                                     | Cluster0154 |
| 1425797_a_at | Sykb                                  | spleen tyrosine kinase                                                                                    | Cluster0154 |
| 1422168_a_at | Bdnf                                  | brain derived neurotrophic factor                                                                         | Cluster0155 |
| 1431187_s_at | Dlg5                                  | discs, large homolog 5 (Drosophila)                                                                       | Cluster0155 |
| 1434887_at   | Ncs1                                  | neuronal calcium sensor 1                                                                                 | Cluster0155 |
| 1422890_at   | Pcdh18                                | protocadherin 18                                                                                          | Cluster0155 |
| 1430427_a_at | Pcdh18                                | protocadherin 18                                                                                          | Cluster0155 |
| 1437360_at   | Pcdh19                                | protocadherin 19                                                                                          | Cluster0155 |
| 1444422_at   | Pcdh19                                | protocadherin 19                                                                                          | Cluster0155 |
| 1455145_at   | Pcdh19                                | protocadherin 19                                                                                          | Cluster0155 |
| 1429974_at   | Tbx18                                 | T-box18                                                                                                   | Cluster0155 |
| 1449871_at   | Tbx18                                 | T-box18                                                                                                   | Cluster0155 |
| 1423310_at   | Tpbp                                  | trophoblast glycoprotein                                                                                  | Cluster0155 |
| 1423311_s_at | Tpbp                                  | trophoblast glycoprotein                                                                                  | Cluster0155 |
| 1454029_at   | 4930431F12Rik                         | RIKEN cDNA 4930431F12 gene                                                                                | Cluster0156 |
| 1430390_x_at | 4930444G20Rik /// AF366264 /// Gm661: | RIKEN cDNA 4930444G20 gene /// cDNA sequence AF366264 /// predicted gene 6611 /// predicted gene 7:       | Cluster0156 |
| 1459085_at   | D1Ert259e                             | DNA segment, Chr 1, ERATO Doi 259, expressed                                                              | Cluster0156 |
| 1422209_s_at | Gm11559 /// Gm11567 /// Gm11568 ///   | predicted gene 11559 /// predicted gene 11567 /// predicted gene 11568 /// keratin associated protein 9-: | Cluster0156 |
| 1427179_at   | Krt33b                                | keratin 33B                                                                                               | Cluster0156 |
| 1420677_x_at | Lce1a1                                | late cornified envelope 1A1                                                                               | Cluster0156 |
| 1442429_at   | NA                                    | ---                                                                                                       | Cluster0156 |
| 1445802_at   | NA                                    | ---                                                                                                       | Cluster0156 |

|              |                                    |                                                                                                      |             |
|--------------|------------------------------------|------------------------------------------------------------------------------------------------------|-------------|
| 1457487_at   | NA                                 | ---                                                                                                  | Cluster0156 |
| 1431363_at   | Nhedc1                             | Na <sup>+</sup> /H <sup>+</sup> exchanger domain containing 1                                        | Cluster0156 |
| 1422927_at   | Yipf7                              | Yip1 domain family, member 7                                                                         | Cluster0156 |
| 1427678_at   | Zim3                               | zinc finger, imprinted 3                                                                             | Cluster0156 |
| 1433534_a_at | Cct2                               | chaperonin containing Tcp1, subunit 2 (beta)                                                         | Cluster0157 |
| 1433535_x_at | Cct2                               | chaperonin containing Tcp1, subunit 2 (beta)                                                         | Cluster0157 |
| 1433447_x_at | Cct4                               | chaperonin containing Tcp1, subunit 4 (delta)                                                        | Cluster0157 |
| 1438560_x_at | Cct4                               | chaperonin containing Tcp1, subunit 4 (delta)                                                        | Cluster0157 |
| 1448264_a_at | Eif3i                              | eukaryotic translation initiation factor 3, subunit I                                                | Cluster0157 |
| 1455855_x_at | Hnrnpab                            | heterogeneous nuclear ribonucleoprotein A/B                                                          | Cluster0157 |
| 1439270_x_at | LOC100045999 /// LOC640204 /// Rar | similar to RAN, member RAS oncogene family /// similar to RAN, member RAS oncogene family /// RAN, m | Cluster0157 |
| 1433569_x_at | LOC100045999 /// Ran               | similar to RAN, member RAS oncogene family /// RAN, member RAS oncogene family                       | Cluster0157 |
| 1434578_x_at | LOC100045999 /// Ran               | similar to RAN, member RAS oncogene family /// RAN, member RAS oncogene family                       | Cluster0157 |
| 1438977_x_at | LOC100045999 /// Ran               | similar to RAN, member RAS oncogene family /// RAN, member RAS oncogene family                       | Cluster0157 |
| 1437280_s_at | Serp1                              | serpine1 mRNA binding protein 1                                                                      | Cluster0157 |
| 1423846_x_at | Tuba1b                             | tubulin, alpha 1B                                                                                    | Cluster0157 |
| 1427198_at   | BC022960                           | cDNA sequence BC022960                                                                               | Cluster0158 |
| 1457871_at   | Colec10                            | collectin sub-family member 10                                                                       | Cluster0158 |
| 1440441_at   | Fbxl7                              | F-box and leucine-rich repeat protein 7                                                              | Cluster0158 |
| 1438350_at   | Gpr64                              | G protein-coupled receptor 64                                                                        | Cluster0158 |
| 1439795_at   | Gpr64                              | G protein-coupled receptor 64                                                                        | Cluster0158 |
| 1442041_at   | LOC552876                          | hypothetical LOC552876                                                                               | Cluster0158 |
| 1446967_at   | NA                                 | ---                                                                                                  | Cluster0158 |
| 1457966_at   | NA                                 | ---                                                                                                  | Cluster0158 |
| 1417553_at   | Plac1                              | placental specific protein 1                                                                         | Cluster0158 |
| 1455893_at   | Rspo2                              | R-spondin 2 homolog ( <i>Xenopus laevis</i> )                                                        | Cluster0158 |
| 1438482_at   | Wwp2                               | WW domain containing E3 ubiquitin protein ligase 2                                                   | Cluster0158 |
| 1456714_at   | Wwp2                               | WW domain containing E3 ubiquitin protein ligase 2                                                   | Cluster0158 |
| 1450141_at   | Abcg3                              | ATP-binding cassette, sub-family G (WHITE), member 3                                                 | Cluster0159 |
| 1449308_at   | C6                                 | complement component 6                                                                               | Cluster0159 |
| 1456936_at   | Calbp4                             | calcium binding protein 4                                                                            | Cluster0159 |
| 1419684_at   | Ccl8                               | chemokine (C-C motif) ligand 8                                                                       | Cluster0159 |
| 1445104_at   | E230029C05Rik                      | RIKEN cDNA E230029C05 gene                                                                           | Cluster0159 |
| 1418243_at   | Fcna                               | ficolin A                                                                                            | Cluster0159 |
| 1454157_a_at | Pla2g2d                            | phospholipase A2, group IID                                                                          | Cluster0159 |
| 1418555_x_at | Spic                               | Spi-C transcription factor (Spi-1/PU.1 related)                                                      | Cluster0159 |
| 1419423_at   | Stab2                              | stabilin 2                                                                                           | Cluster0159 |
| 1451416_a_at | Tgm1                               | transglutaminase 1, K polypeptide                                                                    | Cluster0159 |
| 1455318_at   | Timd4                              | T-cell immunoglobulin and mucin domain containing 4                                                  | Cluster0159 |
| 1448162_at   | Vcam1                              | vascular cell adhesion molecule 1                                                                    | Cluster0159 |
| 1453367_a_at | Abhd12                             | abhydrolase domain containing 12                                                                     | Cluster0160 |
| 1419482_at   | C3ar1                              | complement component 3a receptor 1                                                                   | Cluster0160 |
| 1419483_at   | C3ar1                              | complement component 3a receptor 1                                                                   | Cluster0160 |
| 1442082_at   | C3ar1                              | complement component 3a receptor 1                                                                   | Cluster0160 |
| 1424832_at   | Cd300ld                            | CD300 molecule-like family member d                                                                  | Cluster0160 |
| 1420804_s_at | Clec4d                             | C-type lectin domain family 4, member d                                                              | Cluster0160 |
| 1421492_at   | Hpgds                              | hematopoietic prostaglandin D synthase                                                               | Cluster0160 |
| 1415904_at   | Lpl                                | lipoprotein lipase                                                                                   | Cluster0160 |
| 1431056_a_at | Lpl                                | lipoprotein lipase                                                                                   | Cluster0160 |
| 1416986_a_at | Sirpa                              | signal-regulatory protein alpha                                                                      | Cluster0160 |
| 1448534_at   | Sirpa                              | signal-regulatory protein alpha                                                                      | Cluster0160 |
| 1444152_at   | Celf2                              | CUGBP, Elav-like family member 2                                                                     | Cluster0161 |
| 1442858_at   | Mycbp2                             | MYC binding protein 2                                                                                | Cluster0161 |
| 1445340_at   | Mycbp2                             | MYC binding protein 2                                                                                | Cluster0161 |
| 1447150_at   | Mycbp2                             | MYC binding protein 2                                                                                | Cluster0161 |
| 1439589_at   | NA                                 | ---                                                                                                  | Cluster0161 |
| 1439993_at   | NA                                 | ---                                                                                                  | Cluster0161 |

|              |               |                                                                    |             |
|--------------|---------------|--------------------------------------------------------------------|-------------|
| 1443349_at   | NA            | ---                                                                | Cluster0161 |
| 1446670_at   | NA            | ---                                                                | Cluster0161 |
| 1456715_at   | NA            | ---                                                                | Cluster0161 |
| 1458263_at   | NA            | ---                                                                | Cluster0161 |
| 1459956_at   | NA            | ---                                                                | Cluster0161 |
| 1453549_at   | 4930500G05Rik | RIKEN cDNA 4930500G05 gene                                         | Cluster0162 |
| 1432221_at   | 5330417H12Rik | RIKEN cDNA 5330417H12 gene                                         | Cluster0162 |
| 1432570_at   | 6030458E02Rik | RIKEN cDNA 6030458E02 gene                                         | Cluster0162 |
| 1432893_at   | 9130011L11Rik | RIKEN cDNA 9130011L11 gene                                         | Cluster0162 |
| 1445890_at   | C230079E05Rik | RIKEN cDNA C230079E05 gene                                         | Cluster0162 |
| 1419566_at   | Fank1         | fibronectin type 3 and ankyrin repeat domains 1                    | Cluster0162 |
| 1437596_at   | Lypd4         | Ly6/Plaur domain containing 4                                      | Cluster0162 |
| 1419880_x_at | NA            | ---                                                                | Cluster0162 |
| 1449690_x_at | NA            | ---                                                                | Cluster0162 |
| 1460124_at   | Nccrp1        | non-specific cytotoxic cell receptor protein 1 homolog (zebrafish) | Cluster0162 |
| 1456249_x_at | Syp           | Synaptophysin                                                      | Cluster0162 |
| 1423853_at   | 6330527O06Rik | RIKEN cDNA 6330527O06 gene                                         | Cluster0163 |
| 1436450_at   | D11Bwg0517e   | DNA segment, Chr 11, Brigham & Women s Genetics 0517 expressed     | Cluster0163 |
| 1417121_at   | Gabra6        | gamma-aminobutyric acid (GABA) A receptor, subunit alpha 6         | Cluster0163 |
| 1416561_at   | Gad1          | glutamic acid decarboxylase 1                                      | Cluster0163 |
| 1433987_at   | Hpcal4        | hippocalcin-like 4                                                 | Cluster0163 |
| 1436066_at   | Kalrn         | kalirin, RhoGEF kinase                                             | Cluster0163 |
| 1443855_at   | Kcnc1         | potassium voltage gated channel, Shaw-related subfamily, member 1  | Cluster0163 |
| 1433785_at   | Mobp          | myelin-associated oligodendrocytic basic protein                   | Cluster0163 |
| 1450121_at   | Scn1a         | sodium channel, voltage-gated, type I, alpha                       | Cluster0163 |
| 1451674_at   | Slc12a5       | solute carrier family 12, member 5                                 | Cluster0163 |
| 1420955_at   | Vsnl1         | visinin-like 1                                                     | Cluster0163 |
| 1421498_a_at | 2010204K13Rik | RIKEN cDNA 2010204K13 gene                                         | Cluster0164 |
| 1423511_at   | Asf1a         | ASF1 anti-silencing function 1 homolog A (S. cerevisiae)           | Cluster0164 |
| 1416439_at   | Dctpp1        | dCTP pyrophosphatase 1                                             | Cluster0164 |
| 1426609_at   | Dis3          | DIS3 mitotic control homolog (S. cerevisiae)                       | Cluster0164 |
| 1431349_at   | Hnrnpab       | heterogeneous nuclear ribonucleoprotein A/B                        | Cluster0164 |
| 1416606_s_at | Nhp2          | NHP2 ribonucleoprotein homolog (yeast)                             | Cluster0164 |
| 1423969_at   | Nup37         | nucleoporin 37                                                     | Cluster0164 |
| 1417096_at   | Rrp15         | ribosomal RNA processing 15 homolog (S. cerevisiae)                | Cluster0164 |
| 1428927_at   | Shq1          | SHQ1 homolog (S. cerevisiae)                                       | Cluster0164 |
| 1435379_at   | Urb2          | URB2 ribosome biogenesis 2 homolog (S. cerevisiae)                 | Cluster0164 |
| 1448646_at   | Wdr12         | WD repeat domain 12                                                | Cluster0164 |
| 1427326_at   | 4732471D19Rik | RIKEN cDNA 4732471D19 gene                                         | Cluster0165 |
| 1455793_at   | Fam149a       | family with sequence similarity 149, member A                      | Cluster0165 |
| 1425876_a_at | Glice         | glucuronyl C5-epimerase                                            | Cluster0165 |
| 1423453_at   | Nol12         | nucleolar protein 12                                               | Cluster0165 |
| 1433658_x_at | Pcbp4         | poly(rC) binding protein 4                                         | Cluster0165 |
| 1449054_a_at | Pcbp4         | poly(rC) binding protein 4                                         | Cluster0165 |
| 1449055_x_at | Pcbp4         | poly(rC) binding protein 4                                         | Cluster0165 |
| 1417959_at   | Pdlim7        | PDZ and LIM domain 7                                               | Cluster0165 |
| 1436910_at   | Rasal2        | RAS protein activator like 2                                       | Cluster0165 |
| 1434938_at   | Rbm9          | RNA binding motif protein 9                                        | Cluster0165 |
| 1451105_at   | Vash2         | vasohibin 2                                                        | Cluster0165 |
| 1425300_at   | Dak           | dihydroxyacetone kinase 2 homolog (yeast)                          | Cluster0166 |
| 1420709_s_at | Dao           | D-amino acid oxidase                                               | Cluster0166 |
| 1445746_at   | Eif4h         | Eukaryotic translation initiation factor 4H                        | Cluster0166 |
| 1444599_at   | Herc4         | hect domain and RLD 4                                              | Cluster0166 |
| 1419185_a_at | MLxip1        | MLX interacting protein-like                                       | Cluster0166 |
| 1439535_at   | NA            | ---                                                                | Cluster0166 |
| 1447891_at   | NA            | ---                                                                | Cluster0166 |
| 1439797_at   | Ppard         | peroxisome proliferator activator receptor delta                   | Cluster0166 |

|              |                             |                                                                                                                 |             |
|--------------|-----------------------------|-----------------------------------------------------------------------------------------------------------------|-------------|
| 1454257_at   | Sptlc2                      | serine palmitoyltransferase, long chain base subunit 2                                                          | Cluster0166 |
| 1444396_at   | Trp53inp2                   | Transformation related protein 53 inducible nuclear protein 2                                                   | Cluster0166 |
| 1442439_at   | W91776                      | expressed sequence W91776                                                                                       | Cluster0166 |
| 1445934_at   | Arih2                       | ariadne homolog 2 (Drosophila)                                                                                  | Cluster0167 |
| 1439094_at   | Cltc                        | clathrin, heavy polypeptide (Hc)                                                                                | Cluster0167 |
| 1448049_at   | Jmjd1c                      | jumonji domain containing 1C                                                                                    | Cluster0167 |
| 1440457_at   | NA                          | ---                                                                                                             | Cluster0167 |
| 1441328_at   | NA                          | ---                                                                                                             | Cluster0167 |
| 1444728_at   | NA                          | ---                                                                                                             | Cluster0167 |
| 1446722_at   | NA                          | ---                                                                                                             | Cluster0167 |
| 1455773_at   | NA                          | ---                                                                                                             | Cluster0167 |
| 1456808_at   | NA                          | ---                                                                                                             | Cluster0167 |
| 1457231_at   | NA                          | ---                                                                                                             | Cluster0167 |
| 1446464_at   | Psme4                       | Proteasome (prosome, macropain) activator subunit 4                                                             | Cluster0167 |
| 1431577_at   | 5430437J10Rik               | RIKEN cDNA 5430437J10 gene                                                                                      | Cluster0168 |
| 1450702_at   | Hfe                         | hemochromatosis                                                                                                 | Cluster0168 |
| 1438084_at   | NA                          | ---                                                                                                             | Cluster0168 |
| 1440790_x_at | NA                          | ---                                                                                                             | Cluster0168 |
| 1441692_at   | NA                          | ---                                                                                                             | Cluster0168 |
| 1445984_at   | NA                          | ---                                                                                                             | Cluster0168 |
| 1443629_at   | Nav1                        | neuron navigator 1                                                                                              | Cluster0168 |
| 1439588_at   | Slco5a1                     | solute carrier organic anion transporter family, member 5A1                                                     | Cluster0168 |
| 1440874_at   | Slco5a1                     | solute carrier organic anion transporter family, member 5A1                                                     | Cluster0168 |
| 1439997_at   | Synj1                       | synaptojanin 1                                                                                                  | Cluster0168 |
| 1436397_at   | Tifab                       | TRAF-interacting protein with forkhead-associated domain, family member B                                       | Cluster0168 |
| 1444484_at   | A130009E19Rik               | RIKEN cDNA A130009E19 gene                                                                                      | Cluster0169 |
| 1446188_at   | Cep97                       | centrosomal protein 97                                                                                          | Cluster0169 |
| 1439121_at   | H2-T10 /// H2-T22 /// H2-T9 | histocompatibility 2, T region locus 10 /// histocompatibility 2, T region locus 22 /// histocompatibility 2, T | Cluster0169 |
| 1439641_at   | LOC553090                   | hypothetical LOC553090                                                                                          | Cluster0169 |
| 1441747_at   | NA                          | ---                                                                                                             | Cluster0169 |
| 1442820_at   | NA                          | ---                                                                                                             | Cluster0169 |
| 1445665_at   | NA                          | ---                                                                                                             | Cluster0169 |
| 1457608_at   | NA                          | ---                                                                                                             | Cluster0169 |
| 1459272_at   | NA                          | ---                                                                                                             | Cluster0169 |
| 1443877_a_at | Rapgef6                     | Rap guanine nucleotide exchange factor (GEF) 6                                                                  | Cluster0169 |
| 1452319_at   | Zfp82                       | zinc finger protein 82                                                                                          | Cluster0169 |
| 1430232_at   | 4933407E14Rik               | RIKEN cDNA 4933407E14 gene                                                                                      | Cluster0170 |
| 1441091_at   | Elov17                      | ELOVL family member 7, elongation of long chain fatty acids (yeast)                                             | Cluster0170 |
| 1454022_at   | Ephb2                       | Eph receptor B2                                                                                                 | Cluster0170 |
| 1441375_at   | NA                          | ---                                                                                                             | Cluster0170 |
| 1442178_at   | NA                          | ---                                                                                                             | Cluster0170 |
| 1446772_at   | NA                          | ---                                                                                                             | Cluster0170 |
| 1446963_at   | NA                          | ---                                                                                                             | Cluster0170 |
| 1459443_at   | NA                          | ---                                                                                                             | Cluster0170 |
| 1436335_at   | Plch2                       | phospholipase C, eta 2                                                                                          | Cluster0170 |
| 1442811_at   | Rgmb                        | RGM domain family, member B                                                                                     | Cluster0170 |
| 1458347_s_at | Tmprss2                     | transmembrane protease, serine 2                                                                                | Cluster0170 |
| 1435191_at   | Cdsn                        | corneodesmosin                                                                                                  | Cluster0171 |
| 1419602_at   | Hoxa2                       | homeobox A2                                                                                                     | Cluster0171 |
| 1441358_at   | Pcdhb16                     | protocadherin beta 16                                                                                           | Cluster0171 |
| 1441994_at   | Pcdhb16                     | protocadherin beta 16                                                                                           | Cluster0171 |
| 1450216_at   | Pcdhb16                     | protocadherin beta 16                                                                                           | Cluster0171 |
| 1443173_at   | Ptn                         | pleiotrophin                                                                                                    | Cluster0171 |
| 1419255_at   | Spnb2                       | spectrin beta 2                                                                                                 | Cluster0171 |
| 1444089_at   | Spnb2                       | spectrin beta 2                                                                                                 | Cluster0171 |
| 1451830_a_at | Spnb2                       | spectrin beta 2                                                                                                 | Cluster0171 |
| 1436244_a_at | Tle2                        | transducin-like enhancer of split 2, homolog of Drosophila E(spl)                                               | Cluster0171 |

|              |                       |                                                                                                                 |             |
|--------------|-----------------------|-----------------------------------------------------------------------------------------------------------------|-------------|
| 1416668_at   | Ttc35                 | tetratricopeptide repeat domain 35                                                                              | Cluster0171 |
| 1445881_at   | 2310035P21Rik         | RIKEN cDNA 2310035P21 gene                                                                                      | Cluster0172 |
| 1442513_at   | BC016423              | cDNA sequence BC016423                                                                                          | Cluster0172 |
| 1457163_at   | D730035F11Rik         | RIKEN cDNA D730035F11 gene                                                                                      | Cluster0172 |
| 1443675_at   | NA                    | ---                                                                                                             | Cluster0172 |
| 1444449_at   | NA                    | ---                                                                                                             | Cluster0172 |
| 1457264_at   | Phf20l1               | PHD finger protein 20-like 1                                                                                    | Cluster0172 |
| 1416355_at   | Rbmx                  | RNA binding motif protein, X chromosome                                                                         | Cluster0172 |
| 1440061_at   | Rbx1                  | ring-box 1                                                                                                      | Cluster0172 |
| 1457796_at   | Ubr1                  | Ubiquitin protein ligase E3 component n-recognin 1                                                              | Cluster0172 |
| 1446512_at   | Zc3h15                | zinc finger CCCH-type containing 15                                                                             | Cluster0172 |
| 1456771_at   | Zer1                  | zer-1 homolog (C. elegans)                                                                                      | Cluster0172 |
| 1423816_at   | Cxx1a /// Cxx1b       | CAAX box 1 homolog A (human) /// CAAX box 1 homolog B (human)                                                   | Cluster0173 |
| 1417662_at   | Elk3                  | ELK3, member of ETS oncogene family                                                                             | Cluster0173 |
| 1438402_at   | Fam171a1              | family with sequence similarity 171, member A1                                                                  | Cluster0173 |
| 1433638_s_at | Hoxd8                 | homeobox D8                                                                                                     | Cluster0173 |
| 1425862_a_at | Pik3c2a               | phosphatidylinositol 3-kinase, C2 domain containing, alpha polypeptide                                          | Cluster0173 |
| 1422038_a_at | Tnfrsf22              | tumor necrosis factor receptor superfamily, member 22                                                           | Cluster0173 |
| 1422039_at   | Tnfrsf22              | tumor necrosis factor receptor superfamily, member 22                                                           | Cluster0173 |
| 1426095_a_at | Tnfrsf22              | tumor necrosis factor receptor superfamily, member 22                                                           | Cluster0173 |
| 1442590_at   | Tnfrsf22 /// Tnfrsf23 | tumor necrosis factor receptor superfamily, member 22 /// tumor necrosis factor receptor superfamily, member 23 | Cluster0173 |
| 1422101_at   | Tnfrsf23              | tumor necrosis factor receptor superfamily, member 23                                                           | Cluster0173 |
| 1441968_at   | Tspan9                | tetraspanin 9                                                                                                   | Cluster0173 |
| 1430315_at   | 1700010N08Rik         | RIKEN cDNA 1700010N08 gene                                                                                      | Cluster0174 |
| 1432989_at   | 2900011F02Rik         | RIKEN cDNA 2900011F02 gene                                                                                      | Cluster0174 |
| 1433173_at   | 5430440L12Rik         | RIKEN cDNA 5430440L12 gene                                                                                      | Cluster0174 |
| 1438372_at   | Myom2                 | myomesin 2                                                                                                      | Cluster0174 |
| 1419882_at   | NA                    | ---                                                                                                             | Cluster0174 |
| 1420206_at   | NA                    | ---                                                                                                             | Cluster0174 |
| 1442551_at   | NA                    | ---                                                                                                             | Cluster0174 |
| 1446028_at   | NA                    | ---                                                                                                             | Cluster0174 |
| 1447303_at   | NA                    | ---                                                                                                             | Cluster0174 |
| 1442208_at   | Scn8a                 | Sodium channel, voltage-gated, type VIII, alpha                                                                 | Cluster0174 |
| 1445972_at   | Ush2a                 | Usher syndrome 2A (autosomal recessive, mild) homolog (human)                                                   | Cluster0174 |
| 1426619_at   | Aim2                  | absent in melanoma 2                                                                                            | Cluster0175 |
| 1422191_at   | Cd200r1               | CD200 receptor 1                                                                                                | Cluster0175 |
| 1415947_at   | Creg1                 | cellular repressor of E1A-stimulated genes 1                                                                    | Cluster0175 |
| 1421143_at   | Diap1                 | diaphanous homolog 1 (Drosophila)                                                                               | Cluster0175 |
| 1418296_at   | Fxyd5                 | FXYD domain-containing ion transport regulator 5                                                                | Cluster0175 |
| 1435795_at   | Glb1                  | galactosidase, beta 1                                                                                           | Cluster0175 |
| 1426169_a_at | Lat2                  | linker for activation of T cells family, member 2                                                               | Cluster0175 |
| 1424826_s_at | Mtss1                 | metastasis suppressor 1                                                                                         | Cluster0175 |
| 1425125_at   | Oit3                  | oncprotein induced transcript 3                                                                                 | Cluster0175 |
| 1419289_a_at | Syngr1                | synaptogyrin 1                                                                                                  | Cluster0175 |
| 1439039_at   | Tmem104               | transmembrane protein 104                                                                                       | Cluster0175 |
| 1432454_at   | 2410137M14Rik         | RIKEN cDNA 2410137M14 gene                                                                                      | Cluster0176 |
| 1430947_at   | 4930549C15Rik         | RIKEN cDNA 4930549C15 gene                                                                                      | Cluster0176 |
| 1433035_at   | 5430430K15Rik         | RIKEN cDNA 5430430K15 gene                                                                                      | Cluster0176 |
| 1457531_a_at | A930017K11Rik         | RIKEN cDNA A930017K11 gene                                                                                      | Cluster0176 |
| 1459924_at   | Atp6v0a1              | ATPase, H+ transporting, lysosomal V0 subunit A1                                                                | Cluster0176 |
| 1419808_at   | Cog4                  | component of oligomeric golgi complex 4                                                                         | Cluster0176 |
| 1431342_at   | Gm15622               | predicted gene 15622                                                                                            | Cluster0176 |
| 1442328_at   | Grin2d                | glutamate receptor, ionotropic, NMDA2D (epsilon 4)                                                              | Cluster0176 |
| 1450619_x_at | NA                    | ---                                                                                                             | Cluster0176 |
| 1458749_at   | NA                    | ---                                                                                                             | Cluster0176 |
| 1440118_at   | Slc25a39              | solute carrier family 25, member 39                                                                             | Cluster0176 |
| 1438205_at   | 1110014N23Rik         | RIKEN cDNA 1110014N23 gene                                                                                      | Cluster0177 |

|              |                     |                                                                                                                   |             |
|--------------|---------------------|-------------------------------------------------------------------------------------------------------------------|-------------|
| 1448346_at   | Cfl1                | cofilin 1, non-muscle                                                                                             | Cluster0177 |
| 1432411_a_at | Fbxw2               | F-box and WD-40 domain protein 2                                                                                  | Cluster0177 |
| 1424070_at   | Napg                | N-ethylmaleimide sensitive fusion protein attachment protein gamma                                                | Cluster0177 |
| 1422082_a_at | Nfya                | nuclear transcription factor-Y alpha                                                                              | Cluster0177 |
| 1417350_at   | Pldn                | pallidin                                                                                                          | Cluster0177 |
| 1424179_at   | Pleckhj1            | pleckstrin homology domain containing, family J member 1                                                          | Cluster0177 |
| 1422119_at   | Rab5b               | RAB5B, member RAS oncogene family                                                                                 | Cluster0177 |
| 1453623_a_at | Rad23a              | RAD23a homolog (S. cerevisiae)                                                                                    | Cluster0177 |
| 1427567_a_at | Tpm3                | tropomyosin 3, gamma                                                                                              | Cluster0177 |
| 1416475_at   | Ube2d2              | ubiquitin-conjugating enzyme E2D 2                                                                                | Cluster0177 |
| 1432923_at   | 2810404I24Rik       | RIKEN cDNA 2810404I24 gene                                                                                        | Cluster0178 |
| 1432784_at   | 4930556A17Rik       | RIKEN cDNA 4930556A17 gene                                                                                        | Cluster0178 |
| 1459846_x_at | Cnpy2               | canopy 2 homolog (zebrafish)                                                                                      | Cluster0178 |
| 1447826_x_at | Iffo1               | intermediate filament family orphan 1                                                                             | Cluster0178 |
| 1438152_at   | NA                  | ---                                                                                                               | Cluster0178 |
| 1441532_at   | NA                  | ---                                                                                                               | Cluster0178 |
| 1447247_at   | NA                  | ---                                                                                                               | Cluster0178 |
| 1449804_at   | Pnmt                | phenylethanolamine-N-methyltransferase                                                                            | Cluster0178 |
| 1436806_at   | Trim62              | tripartite motif-containing 62                                                                                    | Cluster0178 |
| 1436807_x_at | Trim62              | tripartite motif-containing 62                                                                                    | Cluster0178 |
| 1432204_at   | 4930570B17Rik       | RIKEN cDNA 4930570B17 gene                                                                                        | Cluster0179 |
| 1432839_at   | 6430598H11Rik       | RIKEN cDNA 6430598H11 gene                                                                                        | Cluster0179 |
| 1454498_at   | 9230118N17Rik       | RIKEN cDNA 9230118N17 gene                                                                                        | Cluster0179 |
| 1433289_at   | 9530078B04Rik       | RIKEN cDNA 9530078B04 gene                                                                                        | Cluster0179 |
| 1420627_a_at | Csn1s1              | casein alpha s1                                                                                                   | Cluster0179 |
| 1438987_at   | Fam71d              | family with sequence similarity 71, member D                                                                      | Cluster0179 |
| 1425946_at   | Gstm7               | glutathione S-transferase, mu 7                                                                                   | Cluster0179 |
| 1419779_at   | NA                  | ---                                                                                                               | Cluster0179 |
| 1442589_at   | NA                  | ---                                                                                                               | Cluster0179 |
| 1441862_at   | Ppox                | protoporphyrinogen oxidase                                                                                        | Cluster0179 |
| 1430275_a_at | Aqr                 | aquarius                                                                                                          | Cluster0180 |
| 1426846_at   | Cenpt               | centromere protein T                                                                                              | Cluster0180 |
| 1451231_a_at | Cul2                | cullin 2                                                                                                          | Cluster0180 |
| 1416969_at   | Gtse1               | G two S phase expressed protein 1                                                                                 | Cluster0180 |
| 1426456_a_at | Pias2               | protein inhibitor of activated STAT 2                                                                             | Cluster0180 |
| 1428760_at   | Snapc3              | small nuclear RNA activating complex, polypeptide 3                                                               | Cluster0180 |
| 1453077_a_at | Snapc3              | small nuclear RNA activating complex, polypeptide 3                                                               | Cluster0180 |
| 1417754_at   | Topors              | topoisomerase I binding, arginine/serine-rich                                                                     | Cluster0180 |
| 1417755_at   | Topors              | topoisomerase I binding, arginine/serine-rich                                                                     | Cluster0180 |
| 1433479_at   | Ubr7                | ubiquitin protein ligase E3 component n-recogin 7 (putative)                                                      | Cluster0180 |
| 1422076_at   | Acot4               | acyl-CoA thioesterase 4                                                                                           | Cluster0181 |
| 1418848_at   | Aqp7                | aquaporin 7                                                                                                       | Cluster0181 |
| 1418849_x_at | Aqp7                | aquaporin 7                                                                                                       | Cluster0181 |
| 1427002_s_at | Arsg                | arylsulfatase G                                                                                                   | Cluster0181 |
| 1452277_at   | Arsg                | arylsulfatase G                                                                                                   | Cluster0181 |
| 1424853_s_at | Cyp4a10 /// Cyp4a31 | cytochrome P450, family 4, subfamily a, polypeptide 10 /// cytochrome P450, family 4, subfamily a, polypeptide 31 | Cluster0181 |
| 1422348_at   | LOC676708           | similar to H-2 class I histocompatibility antigen, L-D alpha chain precursor                                      | Cluster0181 |
| 1424716_at   | Retsat              | retinol saturase (all trans retinol 13,14 reductase)                                                              | Cluster0181 |
| 1421556_at   | Serpina3a           | serine (or cysteine) peptidase inhibitor, clade A, member 3A                                                      | Cluster0181 |
| 1421848_at   | Slc22a5             | solute carrier family 22 (organic cation transporter), member 5                                                   | Cluster0181 |
| 1439363_at   | 1200014J11Rik       | RIKEN cDNA 1200014J11 gene                                                                                        | Cluster0182 |
| 1433101_at   | 9030419F21Rik       | RIKEN cDNA 9030419F21 gene                                                                                        | Cluster0182 |
| 1419563_at   | Birc6               | baculoviral IAP repeat-containing 6                                                                               | Cluster0182 |
| 1457677_at   | C920016K16Rik       | RIKEN cDNA C920016K16 gene                                                                                        | Cluster0182 |
| 1435550_at   | MLI2                | myeloid/lymphoid or mixed-lineage leukemia 2                                                                      | Cluster0182 |
| 1441117_at   | NA                  | ---                                                                                                               | Cluster0182 |
| 1456683_at   | Sltm                | SAFB-like, transcription modulator                                                                                | Cluster0182 |



|              |                                           |                                                                                                                  |             |
|--------------|-------------------------------------------|------------------------------------------------------------------------------------------------------------------|-------------|
| 1423197_a_at | Smek2                                     | SMEK homolog 2, suppressor of mek1 (Dictyostelium)                                                               | Cluster0182 |
| 1441528_at   | Ttc15                                     | tetratricopeptide repeat domain 15                                                                               | Cluster0182 |
| 1446855_at   | Vps13d                                    | vacuolar protein sorting 13 D (yeast)                                                                            | Cluster0182 |
| 1446606_at   | 1700028E10Rik                             | RIKEN cDNA 1700028E10 gene                                                                                       | Cluster0183 |
| 1449038_at   | Hsd11b1                                   | hydroxysteroid 11-beta dehydrogenase 1                                                                           | Cluster0183 |
| 1448759_at   | Il2rb                                     | interleukin 2 receptor, beta chain                                                                               | Cluster0183 |
| 1457917_at   | Lck                                       | Lymphocyte protein tyrosine kinase                                                                               | Cluster0183 |
| 1449393_at   | LOC100046930 /// Sh2d2a                   | similar to T cell signal transduction molecule1 SAP /// SH2 domain protein 1A                                    | Cluster0183 |
| 1423467_at   | Ms4a4b                                    | membrane-spanning 4-domains, subfamily A, member 4B                                                              | Cluster0183 |
| 1425325_at   | Ms4a4b                                    | membrane-spanning 4-domains, subfamily A, member 4B                                                              | Cluster0183 |
| 1449516_a_at | Rgs3                                      | regulator of G-protein signaling 3                                                                               | Cluster0183 |
| 1454656_at   | Spata13                                   | spermatogenesis associated 13                                                                                    | Cluster0183 |
| 1455297_at   | Spin2                                     | spindlin family, member 2                                                                                        | Cluster0183 |
| 1431381_at   | 3110005L24Rik                             | RIKEN cDNA 3110005L24 gene                                                                                       | Cluster0184 |
| 1441705_at   | AU015680                                  | expressed sequence AU015680                                                                                      | Cluster0184 |
| 1444674_at   | AU015680                                  | expressed sequence AU015680                                                                                      | Cluster0184 |
| 1457174_at   | AU015680                                  | expressed sequence AU015680                                                                                      | Cluster0184 |
| 1444030_at   | Dcp1b                                     | DCP1 decapping enzyme homolog b (S. cerevisiae)                                                                  | Cluster0184 |
| 1439376_x_at | Dmtf1                                     | cyclin D binding myb-like transcription factor 1                                                                 | Cluster0184 |
| 1440876_at   | NA                                        | ---                                                                                                              | Cluster0184 |
| 1447077_at   | NA                                        | ---                                                                                                              | Cluster0184 |
| 1438819_at   | Nab1                                      | Ngfi-A binding protein 1                                                                                         | Cluster0184 |
| 1445660_at   | Tmem209                                   | Transmembrane protein 209                                                                                        | Cluster0184 |
| 1453234_at   | 1300002K09Rik                             | RIKEN cDNA 1300002K09 gene                                                                                       | Cluster0185 |
| 1452015_at   | 6330416G13Rik                             | RIKEN cDNA 6330416G13 gene                                                                                       | Cluster0185 |
| 1455885_at   | Amz1                                      | archaelysin family metallopeptidase 1                                                                            | Cluster0185 |
| 1419609_at   | Ccr1                                      | chemokine (C-C motif) receptor 1                                                                                 | Cluster0185 |
| 1420699_at   | Clec7a                                    | C-type lectin domain family 7, member a                                                                          | Cluster0185 |
| 1419128_at   | Itgax                                     | integrin alpha X                                                                                                 | Cluster0185 |
| 1416340_a_at | Man2b1                                    | mannosidase 2, alpha B1                                                                                          | Cluster0185 |
| 1442118_at   | NA                                        | ---                                                                                                              | Cluster0185 |
| 1440483_at   | Plekhn2                                   | Pleckstrin homology domain containing, family M (with RUN domain) member 2                                       | Cluster0185 |
| 1450941_at   | Sdcbp                                     | syndecan binding protein                                                                                         | Cluster0185 |
| 1420582_at   | Cd209e                                    | CD209e antigen                                                                                                   | Cluster0186 |
| 1449976_a_at | Gpr35                                     | G protein-coupled receptor 35                                                                                    | Cluster0186 |
| 1427615_at   | Itga4                                     | integrin alpha 4                                                                                                 | Cluster0186 |
| 1430570_at   | Kynu                                      | kynureninase (L-kynurenine hydrolase)                                                                            | Cluster0186 |
| 1451903_at   | Kynu                                      | kynureninase (L-kynurenine hydrolase)                                                                            | Cluster0186 |
| 1424902_at   | Plexdc1                                   | plexin domain containing 1                                                                                       | Cluster0186 |
| 1428577_at   | Ppfia4                                    | protein tyrosine phosphatase, receptor type, f polypeptide (PTPRF), interacting protein (liprin), alpha 4        | Cluster0186 |
| 1428578_s_at | Ppfia4                                    | protein tyrosine phosphatase, receptor type, f polypeptide (PTPRF), interacting protein (liprin), alpha 4        | Cluster0186 |
| 1452846_at   | Ppfia4                                    | protein tyrosine phosphatase, receptor type, f polypeptide (PTPRF), interacting protein (liprin), alpha 4        | Cluster0186 |
| 1430391_a_at | St8sia4                                   | ST8 alpha-N-acetyl-neuraminide alpha-2,8-sialyltransferase 4                                                     | Cluster0186 |
| 1431736_at   | 4933405D12Rik                             | RIKEN cDNA 4933405D12 gene                                                                                       | Cluster0187 |
| 1456011_x_at | Acaa1a                                    | acetyl-Coenzyme A acyltransferase 1A                                                                             | Cluster0187 |
| 1456737_x_at | Acaa1a                                    | acetyl-Coenzyme A acyltransferase 1A                                                                             | Cluster0187 |
| 1421108_at   | Cml2                                      | camello-like 2                                                                                                   | Cluster0187 |
| 1440580_at   | Efr3b                                     | EFR3 homolog B (S. cerevisiae)                                                                                   | Cluster0187 |
| 1427726_at   | H2-D1                                     | histocompatibility 2, D region locus 1                                                                           | Cluster0187 |
| 1452548_x_at | H2-D1 /// H2-T18 /// H2-T3 /// H2-T3-like | histocompatibility 2, D region locus 1 /// histocompatibility 2, T region locus 18 /// histocompatibility 2, T r | Cluster0187 |
| 1452547_s_at | H2-D1 /// H2-T18 /// H2-T3 /// LOC67437   | histocompatibility 2, D region locus 1 /// histocompatibility 2, T region locus 18 /// histocompatibility 2, T r | Cluster0187 |
| 1460418_x_at | H2-T18                                    | histocompatibility 2, T region locus 18                                                                          | Cluster0187 |
| 1444783_at   | NA                                        | ---                                                                                                              | Cluster0187 |
| 1430671_a_at | 0610010K06Rik                             | RIKEN cDNA 0610010K06 gene                                                                                       | Cluster0188 |
| 1432304_a_at | 9030624J02Rik                             | RIKEN cDNA 9030624J02 gene                                                                                       | Cluster0188 |
| 1430035_at   | Ccdc132                                   | coiled-coil domain containing 132                                                                                | Cluster0188 |
| 1451743_at   | D19Wsu162e                                | DNA segment, Chr 19, Wayne State University 162, expressed                                                       | Cluster0188 |

|              |                        |                                                                                                |             |
|--------------|------------------------|------------------------------------------------------------------------------------------------|-------------|
| 1450161_at   | lkbkg                  | inhibitor of kappaB kinase gamma                                                               | Cluster0188 |
| 1425426_a_at | Mef2a                  | myocyte enhancer factor 2A                                                                     | Cluster0188 |
| 1457301_at   | Prmt10                 | protein arginine methyltransferase 10 (putative)                                               | Cluster0188 |
| 1423842_a_at | Rnf41                  | ring finger protein 41                                                                         | Cluster0188 |
| 1453742_at   | Vps33a                 | vacuolar protein sorting 33A (yeast)                                                           | Cluster0188 |
| 1420816_at   | Ywhag                  | tyrosine 3-monooxygenase/tryptophan 5-monooxygenase activation protein, gamma polypeptide      | Cluster0188 |
| 1426984_at   | 2310067B10Rik          | RIKEN cDNA 2310067B10 gene                                                                     | Cluster0189 |
| 1440094_at   | BC030870               | cDNA sequence BC030870                                                                         | Cluster0189 |
| 1432418_a_at | Ckmt1                  | creatine kinase, mitochondrial 1, ubiquitous                                                   | Cluster0189 |
| 1426153_a_at | Dsg2                   | desmoglein 2                                                                                   | Cluster0189 |
| 1450834_at   | Fut4                   | fucosyltransferase 4                                                                           | Cluster0189 |
| 1444347_at   | Mgat4a                 | mannoside acetylglucosaminyltransferase 4, isoenzyme A                                         | Cluster0189 |
| 1448300_at   | Mgst3                  | microsomal glutathione S-transferase 3                                                         | Cluster0189 |
| 1449205_at   | Ovol2                  | ovo-like 2 (Drosophila)                                                                        | Cluster0189 |
| 1449369_at   | Tmprss2                | transmembrane protease, serine 2                                                               | Cluster0189 |
| 1452742_at   | Trak1                  | trafficking protein, kinesin binding 1                                                         | Cluster0189 |
| 1431528_at   | 5830427D02Rik          | RIKEN cDNA 5830427D02 gene                                                                     | Cluster0190 |
| 1436145_at   | NA                     | ---                                                                                            | Cluster0190 |
| 1437793_at   | NA                     | ---                                                                                            | Cluster0190 |
| 1439344_at   | NA                     | ---                                                                                            | Cluster0190 |
| 1439828_at   | NA                     | ---                                                                                            | Cluster0190 |
| 1456688_at   | NA                     | ---                                                                                            | Cluster0190 |
| 1457641_at   | NA                     | ---                                                                                            | Cluster0190 |
| 1457746_at   | NA                     | ---                                                                                            | Cluster0190 |
| 1458653_at   | NA                     | ---                                                                                            | Cluster0190 |
| 1450045_at   | Srrm1                  | serine/arginine repetitive matrix 1                                                            | Cluster0190 |
| 1434528_at   | Aard                   | alanine and arginine rich domain containing protein                                            | Cluster0191 |
| 1433971_at   | Camta1                 | calmodulin binding transcription activator 1                                                   | Cluster0191 |
| 1418617_x_at | Clgn                   | calmegin                                                                                       | Cluster0191 |
| 1430240_a_at | Clgn                   | calmegin                                                                                       | Cluster0191 |
| 1457829_at   | Clgn                   | calmegin                                                                                       | Cluster0191 |
| 1450752_at   | Cyct                   | cytochrome c, testis                                                                           | Cluster0191 |
| 1434170_at   | Dcaf1211               | DDB1 and CUL4 associated factor 12-like 1                                                      | Cluster0191 |
| 1420720_at   | LOC100044234 /// Nptx2 | hypothetical protein LOC100044234 /// neuronal pentraxin 2                                     | Cluster0191 |
| 1443924_at   | NA                     | ---                                                                                            | Cluster0191 |
| 1423258_at   | Syt9                   | synaptotagmin IX                                                                               | Cluster0191 |
| 1437918_at   | 4930539E08Rik          | RIKEN cDNA 4930539E08 gene                                                                     | Cluster0192 |
| 1424941_at   | BC016579               | cDNA sequence, BC016579                                                                        | Cluster0192 |
| 1450691_at   | Caskin2                | CASK-interacting protein 2                                                                     | Cluster0192 |
| 1420907_at   | Cd2ap                  | CD2-associated protein                                                                         | Cluster0192 |
| 1439476_at   | Dsg2                   | desmoglein 2                                                                                   | Cluster0192 |
| 1449740_s_at | Dsg2                   | desmoglein 2                                                                                   | Cluster0192 |
| 1435493_at   | Dsp                    | desmoplakin                                                                                    | Cluster0192 |
| 1436303_at   | Mllt4                  | myeloid/lymphoid or mixed-lineage leukemia (trithorax homolog, Drosophila); translocated to, 4 | Cluster0192 |
| 1458341_x_at | Pde5a                  | phosphodiesterase 5A, cGMP-specific                                                            | Cluster0192 |
| 1449579_at   | Sh3yl1                 | Sh3 domain YSC-like 1                                                                          | Cluster0192 |
| 1457915_at   | 4833442J19Rik          | RIKEN cDNA 4833442J19 gene                                                                     | Cluster0193 |
| 1418596_at   | Fgfr4                  | fibroblast growth factor receptor 4                                                            | Cluster0193 |
| 1457269_at   | Gm1123                 | predicted gene 1123                                                                            | Cluster0193 |
| 1434158_at   | Gmds                   | GDP-mannose 4, 6-dehydratase                                                                   | Cluster0193 |
| 1449464_at   | Kcnq1                  | potassium voltage-gated channel, subfamily Q, member 1                                         | Cluster0193 |
| 1425151_a_at | Noxo1                  | NADPH oxidase organizer 1                                                                      | Cluster0193 |
| 1438665_at   | Smpd3                  | sphingomyelin phosphodiesterase 3, neutral                                                     | Cluster0193 |
| 1427119_at   | Spink4                 | serine peptidase inhibitor, Kazal type 4                                                       | Cluster0193 |
| 1420017_at   | Tspan8                 | tetraspanin 8                                                                                  | Cluster0193 |
| 1420018_s_at | Tspan8                 | tetraspanin 8                                                                                  | Cluster0193 |
| 1438838_at   | B230206F22Rik          | RIKEN cDNA B230206F22 gene                                                                     | Cluster0194 |

|              |               |                                                                                    |             |
|--------------|---------------|------------------------------------------------------------------------------------|-------------|
| 1434245_a_at | Cybas3        | cytochrome b, ascorbate dependent 3                                                | Cluster0194 |
| 1447244_at   | Cybas3        | cytochrome b, ascorbate dependent 3                                                | Cluster0194 |
| 1458769_at   | D7Ert558e     | DNA segment, Chr 7, ERATO Doi 558, expressed                                       | Cluster0194 |
| 1419907_s_at | Fcrla         | Fc receptor-like A                                                                 | Cluster0194 |
| 1419908_at   | Fcrla         | Fc receptor-like A                                                                 | Cluster0194 |
| 1436260_at   | NA            | ---                                                                                | Cluster0194 |
| 1446293_at   | NA            | ---                                                                                | Cluster0194 |
| 1446953_at   | NA            | ---                                                                                | Cluster0194 |
| 1458201_at   | Tcf4          | Transcription factor 4                                                             | Cluster0194 |
| 1416143_at   | Atp5j         | ATP synthase, H+ transporting, mitochondrial F0 complex, subunit F                 | Cluster0195 |
| 1435395_s_at | Atp5j2        | ATP synthase, H+ transporting, mitochondrial F0 complex, subunit F2                | Cluster0195 |
| 1422525_at   | Atp5k         | ATP synthase, H+ transporting, mitochondrial F1F0 complex, subunit e               | Cluster0195 |
| 1450640_x_at | Atp5k         | ATP synthase, H+ transporting, mitochondrial F1F0 complex, subunit e               | Cluster0195 |
| 1419812_s_at | Ccdc56        | coiled-coil domain containing 56                                                   | Cluster0195 |
| 1448322_a_at | Cox4i1        | cytochrome c oxidase subunit IV isoform 1                                          | Cluster0195 |
| 1417417_a_at | Cox6a1        | cytochrome c oxidase, subunit VI a, polypeptide 1                                  | Cluster0195 |
| 1416970_a_at | Cox7a2        | cytochrome c oxidase, subunit VIIa 2                                               | Cluster0195 |
| 1428322_a_at | Ndufb10       | NADH dehydrogenase (ubiquinone) 1 beta subcomplex, 10                              | Cluster0195 |
| 1448292_at   | Uqcr11        | ubiquinol-cytochrome c reductase, complex III subunit XI                           | Cluster0195 |
| 1415800_at   | Gja1          | gap junction protein, alpha 1                                                      | Cluster0196 |
| 1437992_x_at | Gja1          | gap junction protein, alpha 1                                                      | Cluster0196 |
| 1438650_x_at | Gja1          | gap junction protein, alpha 1                                                      | Cluster0196 |
| 1438945_x_at | Gja1          | gap junction protein, alpha 1                                                      | Cluster0196 |
| 1435383_x_at | Ndn           | necdin                                                                             | Cluster0196 |
| 1455792_x_at | Ndn           | necdin                                                                             | Cluster0196 |
| 1420859_at   | Pkia          | protein kinase inhibitor, alpha                                                    | Cluster0196 |
| 1422449_s_at | Rcn2          | reticulocalbin 2                                                                   | Cluster0196 |
| 1438426_at   | Shisa4        | shisa homolog 4 ( <i>Xenopus laevis</i> )                                          | Cluster0196 |
| 1450923_at   | Tgfb2         | transforming growth factor, beta 2                                                 | Cluster0196 |
| 1430674_at   | 1700016C15Rik | RIKEN cDNA 1700016C15 gene                                                         | Cluster0197 |
| 1421218_at   | Bche          | butyrylcholinesterase                                                              | Cluster0197 |
| 1437863_at   | Bche          | butyrylcholinesterase                                                              | Cluster0197 |
| 1418864_at   | Gata4         | GATA binding protein 4                                                             | Cluster0197 |
| 1430834_at   | Gprin3        | GPRIN family member 3                                                              | Cluster0197 |
| 1422352_at   | Mcpt1         | mast cell protease 1                                                               | Cluster0197 |
| 1459747_at   | NA            | ---                                                                                | Cluster0197 |
| 1450128_at   | Pla2g2a       | phospholipase A2, group IIA (platelets, synovial fluid)                            | Cluster0197 |
| 1431164_at   | Rragd         | Ras-related GTP binding D                                                          | Cluster0197 |
| 1452425_at   | Tnfrsf14      | tumor necrosis factor receptor superfamily, member 14 (herpesvirus entry mediator) | Cluster0197 |
| 1432528_at   | 1700021P04Rik | RIKEN cDNA 1700021P04 gene                                                         | Cluster0198 |
| 1419715_at   | 1700029F12Rik | RIKEN cDNA 1700029F12 gene                                                         | Cluster0198 |
| 1432496_at   | 1700122O11Rik | RIKEN cDNA 1700122O11 gene                                                         | Cluster0198 |
| 1447095_at   | C86942        | expressed sequence C86942                                                          | Cluster0198 |
| 1431690_at   | Kcnh3         | potassium voltage-gated channel, subfamily H (eag-related), member 3               | Cluster0198 |
| 1420262_at   | NA            | ---                                                                                | Cluster0198 |
| 1443647_at   | NA            | ---                                                                                | Cluster0198 |
| 1446207_at   | NA            | ---                                                                                | Cluster0198 |
| 1421250_at   | Slc39a9       | Solute carrier family 39 (zinc transporter), member 9                              | Cluster0198 |
| 1422086_at   | Tbx19         | T-box 19                                                                           | Cluster0198 |
| 1460464_at   | 2700089E24Rik | RIKEN cDNA 2700089E24 gene                                                         | Cluster0199 |
| 1419163_s_at | Dnajc3        | DnaJ (Hsp40) homolog, subfamily C, member 3                                        | Cluster0199 |
| 1433887_at   | Dnajc3        | DnaJ (Hsp40) homolog, subfamily C, member 3                                        | Cluster0199 |
| 1449373_at   | Dnajc3        | DnaJ (Hsp40) homolog, subfamily C, member 3                                        | Cluster0199 |
| 1423334_at   | Ergic1        | endoplasmic reticulum-golgi intermediate compartment (ERGIC) 1                     | Cluster0199 |
| 1417287_at   | H13           | histocompatibility 13                                                              | Cluster0199 |
| 1425188_s_at | Sel1l         | sel-1 suppressor of lin-12-like ( <i>C. elegans</i> )                              | Cluster0199 |
| 1420868_s_at | Tmed2         | transmembrane emp24 domain trafficking protein 2                                   | Cluster0199 |

|              |                        |                                                                                                     |             |
|--------------|------------------------|-----------------------------------------------------------------------------------------------------|-------------|
| 1431036_a_at | Tmed2                  | transmembrane emp24 domain trafficking protein 2                                                    | Cluster0199 |
| 1426416_a_at | Yipf4                  | Yip1 domain family, member 4                                                                        | Cluster0199 |
| 1419312_at   | Atp2a1                 | ATPase, Ca++ transporting, cardiac muscle, fast twitch 1                                            | Cluster0200 |
| 1455736_at   | Mybpc2                 | myosin binding protein C, fast-type                                                                 | Cluster0200 |
| 1427026_at   | Myh4                   | myosin, heavy polypeptide 4, skeletal muscle                                                        | Cluster0200 |
| 1458368_at   | Myh4                   | myosin, heavy polypeptide 4, skeletal muscle                                                        | Cluster0200 |
| 1418155_at   | Myot                   | myotilin                                                                                            | Cluster0200 |
| 1417653_at   | Pvalb                  | parvalbumin                                                                                         | Cluster0200 |
| 1448602_at   | Pygm                   | muscle glycogen phosphorylase                                                                       | Cluster0200 |
| 1416889_at   | Tnni2                  | troponin I, skeletal, fast 2                                                                        | Cluster0200 |
| 1427445_a_at | Ttn                    | titin                                                                                               | Cluster0200 |
| 1427446_s_at | Ttn                    | titin                                                                                               | Cluster0200 |
| 1417326_a_at | Anapc11                | anaphase promoting complex subunit 11                                                               | Cluster0201 |
| 1433611_s_at | Bud31                  | BUD31 homolog (yeast)                                                                               | Cluster0201 |
| 1423087_a_at | LOC100047839 /// Tomm6 | hypothetical protein LOC100047839 /// translocase of outer mitochondrial membrane 6 homolog (yeast) | Cluster0201 |
| 1423386_at   | Psmc9                  | proteasome (prosome, macropain) 26S subunit, non-ATPase, 9                                          | Cluster0201 |
| 1422660_at   | Rbm3                   | RNA binding motif protein 3                                                                         | Cluster0201 |
| 1448387_at   | Rbx1                   | ring-box 1                                                                                          | Cluster0201 |
| 1418575_at   | Shfm1                  | split hand/foot malformation (ectrodactyly) type 1                                                  | Cluster0201 |
| 1415714_a_at | Snrnp27                | small nuclear ribonucleoprotein 27 (U4/U6.U5)                                                       | Cluster0201 |
| 1460697_s_at | Snrnp27                | small nuclear ribonucleoprotein 27 (U4/U6.U5)                                                       | Cluster0201 |
| 1451587_a_at | Tipr1                  | TIP41, TOR signalling pathway regulator-like (S. cerevisiae)                                        | Cluster0201 |
| 1424651_at   | Acsf3                  | acyl-CoA synthetase family member 3                                                                 | Cluster0202 |
| 1426234_s_at | Ap1ar                  | adaptor-related protein complex 1 associated regulatory protein                                     | Cluster0202 |
| 1449710_s_at | Atp5a1                 | ATP synthase, H+ transporting, mitochondrial F1 complex, alpha subunit 1                            | Cluster0202 |
| 1435112_a_at | Atp5h                  | ATP synthase, H+ transporting, mitochondrial F0 complex, subunit d                                  | Cluster0202 |
| 1435300_at   | Letm1                  | leucine zipper-EF-hand containing transmembrane protein 1                                           | Cluster0202 |
| 1415966_a_at | Ndufv1                 | NADH dehydrogenase (ubiquinone) flavoprotein 1                                                      | Cluster0202 |
| 1456015_x_at | Ndufv1                 | NADH dehydrogenase (ubiquinone) flavoprotein 1                                                      | Cluster0202 |
| 1426689_s_at | Sdha                   | succinate dehydrogenase complex, subunit A, flavoprotein (Fp)                                       | Cluster0202 |
| 1455875_x_at | Tm9sf2                 | transmembrane 9 superfamily member 2                                                                | Cluster0202 |
| 1435757_a_at | Uqcrc2                 | ubiquinol cytochrome c reductase core protein 2                                                     | Cluster0202 |
| 1455577_at   | Ccl28                  | chemokine (C-C motif) ligand 28                                                                     | Cluster0203 |
| 1434165_at   | Clhc6                  | chloride intracellular channel 6                                                                    | Cluster0203 |
| 1454866_s_at | Clhc6                  | chloride intracellular channel 6                                                                    | Cluster0203 |
| 1451348_at   | Depdc6                 | DEP domain containing 6                                                                             | Cluster0203 |
| 1451375_at   | Ehf                    | ets homologous factor                                                                               | Cluster0203 |
| 1415837_at   | Klk1                   | kallikrein 1                                                                                        | Cluster0203 |
| 1448107_x_at | Klk1                   | kallikrein 1                                                                                        | Cluster0203 |
| 1424933_at   | Myo5c                  | myosin VC                                                                                           | Cluster0203 |
| 1427149_at   | Plekha6                | pleckstrin homology domain containing, family A member 6                                            | Cluster0203 |
| 1455162_at   | Ttc39a                 | tetratricopeptide repeat domain 39A                                                                 | Cluster0203 |
| 1449921_s_at | Cpne6                  | copine VI                                                                                           | Cluster0204 |
| 1457148_at   | Csmc2                  | CUB and Sushi multiple domains 2                                                                    | Cluster0204 |
| 1417709_at   | Cyp46a1                | cytochrome P450, family 46, subfamily a, polypeptide 1                                              | Cluster0204 |
| 1420557_at   | Epha5                  | Eph receptor A5                                                                                     | Cluster0204 |
| 1441363_at   | Frm3pd3                | FERM and PDZ domain containing 3                                                                    | Cluster0204 |
| 1453098_at   | Gria2                  | glutamate receptor, ionotropic, AMPA2 (alpha 2)                                                     | Cluster0204 |
| 1433701_at   | Mpped1                 | metallophosphoesterase domain containing 1                                                          | Cluster0204 |
| 1457617_at   | NA                     | ---                                                                                                 | Cluster0204 |
| 1449975_a_at | Park2                  | Parkinson disease (autosomal recessive, juvenile) 2, parkin                                         | Cluster0204 |
| 1436980_x_at | Cnot2                  | CCR4-NOT transcription complex, subunit 2                                                           | Cluster0205 |
| 1456576_x_at | Cnot2                  | CCR4-NOT transcription complex, subunit 2                                                           | Cluster0205 |
| 1422855_at   | Cpsf3                  | cleavage and polyadenylation specificity factor 3                                                   | Cluster0205 |
| 1437852_x_at | Cpsf3                  | cleavage and polyadenylation specificity factor 3                                                   | Cluster0205 |
| 1433710_at   | Edc3                   | enhancer of mRNA decapping 3 homolog (S. cerevisiae)                                                | Cluster0205 |
| 1438318_x_at | Ngdn                   | neuroguidin, EIF4E binding protein                                                                  | Cluster0205 |

|              |               |                                                                          |             |
|--------------|---------------|--------------------------------------------------------------------------|-------------|
| 1448888_at   | Ppp1r7        | protein phosphatase 1, regulatory (inhibitor) subunit 7                  | Cluster0205 |
| 1438637_x_at | Sf3b2         | splicing factor 3b, subunit 2                                            | Cluster0205 |
| 1459836_x_at | Sf3b2         | splicing factor 3b, subunit 2                                            | Cluster0205 |
| 1435545_at   | BC032203      | cDNA sequence BC032203                                                   | Cluster0206 |
| 1441631_at   | Ddx24         | DEAD (Asp-Glu-Ala-Asp) box polypeptide 24                                | Cluster0206 |
| 1439571_at   | E230008J23Rik | RIKEN cDNA E230008J23 gene                                               | Cluster0206 |
| 1442568_at   | NA            | ---                                                                      | Cluster0206 |
| 1447466_at   | NA            | ---                                                                      | Cluster0206 |
| 1432421_at   | Pms2          | postmeiotic segregation increased 2 ( <i>S. cerevisiae</i> )             | Cluster0206 |
| 1459573_at   | Rpf1          | ribosome production factor 1 homolog ( <i>S. cerevisiae</i> )            | Cluster0206 |
| 1443956_at   | Zfp397        | zinc finger protein 397                                                  | Cluster0206 |
| 1455666_at   | Zfp595        | zinc finger protein 595                                                  | Cluster0206 |
| 1450764_at   | Aoah          | acyloxyacyl hydrolase                                                    | Cluster0207 |
| 1460156_at   | Aoah          | acyloxyacyl hydrolase                                                    | Cluster0207 |
| 1420523_at   | Ccdc50        | coiled-coil domain containing 50                                         | Cluster0207 |
| 1451161_a_at | Emr1          | EGF-like module containing, mucin-like, hormone receptor-like sequence 1 | Cluster0207 |
| 1450808_at   | Fpr1          | formyl peptide receptor 1                                                | Cluster0207 |
| 1444531_at   | NA            | ---                                                                      | Cluster0207 |
| 1419315_at   | Slamf9        | SLAM family member 9                                                     | Cluster0207 |
| 1436592_at   | Zfp799        | Zinc finger protein 799                                                  | Cluster0207 |
| 1443930_at   | Zfp811        | zinc finger protein 811                                                  | Cluster0207 |
| 1433278_at   | 5830440H09Rik | RIKEN cDNA 5830440H09 gene                                               | Cluster0208 |
| 1433377_at   | 5830445D09Rik | RIKEN cDNA 5830445D09 gene                                               | Cluster0208 |
| 1432800_at   | C030011G24Rik | RIKEN cDNA C030011G24 gene                                               | Cluster0208 |
| 1418218_at   | Ceacam9       | carcinoembryonic antigen-related cell adhesion molecule 9                | Cluster0208 |
| 1446126_at   | Gm3388        | Predicted gene 3388                                                      | Cluster0208 |
| 1439100_s_at | Krtap11-1     | keratin associated protein 11-1                                          | Cluster0208 |
| 1458850_at   | NA            | ---                                                                      | Cluster0208 |
| 1459393_at   | NA            | ---                                                                      | Cluster0208 |
| 1460421_at   | Zfp133        | zinc finger protein 133                                                  | Cluster0208 |
| 1431094_at   | 1110006E14Rik | RIKEN cDNA 1110006E14 gene                                               | Cluster0209 |
| 1426758_s_at | Meg3          | maternally expressed 3                                                   | Cluster0209 |
| 1436713_s_at | Meg3          | maternally expressed 3                                                   | Cluster0209 |
| 1439380_x_at | Meg3          | maternally expressed 3                                                   | Cluster0209 |
| 1452183_a_at | Meg3          | maternally expressed 3                                                   | Cluster0209 |
| 1452905_at   | Meg3          | maternally expressed 3                                                   | Cluster0209 |
| 1426208_x_at | Plagl1        | pleiomorphic adenoma gene-like 1                                         | Cluster0209 |
| 1427580_a_at | Rian          | RNA imprinted and accumulated in nucleus                                 | Cluster0209 |
| 1452899_at   | Rian          | RNA imprinted and accumulated in nucleus                                 | Cluster0209 |
| 1426220_at   | 4930471M23Rik | RIKEN cDNA 4930471M23 gene                                               | Cluster0210 |
| 1416769_s_at | Atp6v0b       | ATPase, H+ transporting, lysosomal V0 subunit B                          | Cluster0210 |
| 1425448_x_at | Atp6v0b       | ATPase, H+ transporting, lysosomal V0 subunit B                          | Cluster0210 |
| 1416924_at   | Bri3          | brain protein I3                                                         | Cluster0210 |
| 1422507_at   | Cstb          | cystatin B                                                               | Cluster0210 |
| 1435680_a_at | Dpp7          | dipeptidylpeptidase 7                                                    | Cluster0210 |
| 1424129_at   | Mfsd1         | major facilitator superfamily domain containing 1                        | Cluster0210 |
| 1454718_at   | Nagpa         | N-acetylglucosamine-1-phosphodiester alpha-N-acetylglucosaminidase       | Cluster0210 |
| 1453052_at   | Tmem192       | transmembrane protein 192                                                | Cluster0210 |
| 1441512_at   | 6030445D17Rik | RIKEN cDNA 6030445D17 gene                                               | Cluster0211 |
| 1435784_at   | Atg9a         | autophagy-related 9A (yeast)                                             | Cluster0211 |
| 1459973_x_at | Dpp4          | dipeptidylpeptidase 4                                                    | Cluster0211 |
| 1437381_x_at | Gpr172b       | G protein-coupled receptor 172B                                          | Cluster0211 |
| 1439451_x_at | Gpr172b       | G protein-coupled receptor 172B                                          | Cluster0211 |
| 1451256_at   | Gpr172b       | G protein-coupled receptor 172B                                          | Cluster0211 |
| 1454870_x_at | Gpr172b       | G protein-coupled receptor 172B                                          | Cluster0211 |
| 1430804_at   | Slc13a1       | solute carrier family 13 (sodium/sulfate symporters), member 1           | Cluster0211 |
| 1431379_a_at | Slc13a1       | solute carrier family 13 (sodium/sulfate symporters), member 1           | Cluster0211 |

|                       |                                        |                                                                                                            |             |
|-----------------------|----------------------------------------|------------------------------------------------------------------------------------------------------------|-------------|
| 1429812_at            | 2610002D18Rik                          | RIKEN cDNA 2610002D18 gene                                                                                 | Cluster0212 |
| 1439648_at            | Anln                                   | anillin, actin binding protein                                                                             | Cluster0212 |
| 1454636_at            | Cbx5                                   | chromobox homolog 5 (Drosophila HP1a)                                                                      | Cluster0212 |
| 1448314_at            | Cdk1                                   | cyclin-dependent kinase 1                                                                                  | Cluster0212 |
| 1458447_at            | Cenpf                                  | centromere protein F                                                                                       | Cluster0212 |
| 1437349_at            | Ckap5                                  | cytoskeleton associated protein 5                                                                          | Cluster0212 |
| 1423026_at            | Rad51c                                 | RAD51 homolog c (S. cerevisiae)                                                                            | Cluster0212 |
| 1451092_a_at          | Rangap1                                | RAN GTPase activating protein 1                                                                            | Cluster0212 |
| 1416726_s_at          | Ube2s                                  | ubiquitin-conjugating enzyme E2S                                                                           | Cluster0212 |
| 1416454_s_at          | Acta2                                  | actin, alpha 2, smooth muscle, aorta                                                                       | Cluster0213 |
| 1455404_at            | Jph2                                   | junctophilin 2                                                                                             | Cluster0213 |
| 1427201_at            | Mustn1                                 | musculoskeletal, embryonic nuclear protein 1                                                               | Cluster0213 |
| 1452670_at            | MyI9                                   | myosin, light polypeptide 9, regulatory                                                                    | Cluster0213 |
| 1423505_at            | Tagln                                  | transgelin                                                                                                 | Cluster0213 |
| 1423049_a_at          | Tpm1                                   | tropomyosin 1, alpha                                                                                       | Cluster0213 |
| 1423721_at            | Tpm1                                   | tropomyosin 1, alpha                                                                                       | Cluster0213 |
| 1419738_a_at          | Tpm2                                   | tropomyosin 2, beta                                                                                        | Cluster0213 |
| 1425028_a_at          | Tpm2                                   | tropomyosin 2, beta                                                                                        | Cluster0213 |
| 1437384_at            | 1700015E13Rik                          | RIKEN cDNA 1700015E13 gene                                                                                 | Cluster0214 |
| 1454314_at            | 4930578G10Rik                          | RIKEN cDNA 4930578G10 gene                                                                                 | Cluster0214 |
| 1449649_at            | Atp6v1b2                               | ATPase, H+ transporting, lysosomal V1 subunit B2                                                           | Cluster0214 |
| 1430509_at            | Gm11567                                | predicted gene 11567                                                                                       | Cluster0214 |
| 1443549_at            | lspd                                   | isoprenoid synthase domain containing                                                                      | Cluster0214 |
| 1458421_at            | Kcnq3                                  | potassium voltage-gated channel, subfamily Q, member 3                                                     | Cluster0214 |
| 1446348_at            | NA                                     | ---                                                                                                        | Cluster0214 |
| 1422382_at            | Olf16                                  | olfactory receptor 16                                                                                      | Cluster0214 |
| 1448841_at            | Pfpl                                   | pore forming protein-like                                                                                  | Cluster0214 |
| 1418972_at            | Bcl10                                  | B-cell leukemia/lymphoma 10                                                                                | Cluster0215 |
| 1448851_a_at          | Dnajc5                                 | DnaJ (Hsp40) homolog, subfamily C, member 5                                                                | Cluster0215 |
| 1425803_a_at          | Mbd2                                   | methyl-CpG binding domain protein 2                                                                        | Cluster0215 |
| AFFX-r2-Bs-phe-5_atNA |                                        | ---                                                                                                        | Cluster0215 |
| 1449018_at            | Pfn1                                   | profilin 1                                                                                                 | Cluster0215 |
| 1429554_at            | Sdccag3                                | serologically defined colon cancer antigen 3                                                               | Cluster0215 |
| 1453195_at            | Sdccag3                                | serologically defined colon cancer antigen 3                                                               | Cluster0215 |
| 1451465_at            | Ubl7                                   | ubiquitin-like 7 (bone marrow stromal cell-derived)                                                        | Cluster0215 |
| 1450851_at            | Wdr1                                   | WD repeat domain 1                                                                                         | Cluster0215 |
| 1448217_a_at          | Gm11518 /// Gm6199 /// Rpl27 /// Rpl27 | predicted gene 11518 /// ribosomal protein L27-like /// ribosomal protein L27 /// ribosomal protein L27, p | Cluster0216 |
| 1453096_x_at          | Gm11518 /// Gm6199 /// Rpl27 /// Rpl27 | predicted gene 11518 /// ribosomal protein L27-like /// ribosomal protein L27 /// ribosomal protein L27, p | Cluster0216 |
| 1416520_x_at          | Gm13611 /// Gm4604 /// LOC100048508    | predicted gene 13611 /// predicted gene 4604 /// similar to Rpl36 protein /// ribosomal protein L36        | Cluster0216 |
| 1433510_x_at          | Gm13611 /// Gm4604 /// LOC100048508    | predicted gene 13611 /// predicted gene 4604 /// similar to Rpl36 protein /// ribosomal protein L36        | Cluster0216 |
| 1433688_x_at          | Rpl14                                  | ribosomal protein L14                                                                                      | Cluster0216 |
| 1436688_x_at          | Rpl14                                  | ribosomal protein L14                                                                                      | Cluster0216 |
| 1438507_x_at          | Rpl14                                  | ribosomal protein L14                                                                                      | Cluster0216 |
| 1438626_x_at          | Rpl14                                  | ribosomal protein L14                                                                                      | Cluster0216 |
| 1448245_at            | Rpsa                                   | ribosomal protein SA                                                                                       | Cluster0216 |
| 1456730_x_at          | Actl6a                                 | actin-like 6A                                                                                              | Cluster0217 |
| 1439387_x_at          | Ctu2 /// LOC637671                     | cytosolic thiouridylase subunit 2 homolog (S. pombe) /// similar to RIKEN cDNA 2310061F22 gene             | Cluster0217 |
| 1451641_at            | Dbr1                                   | debranching enzyme homolog 1 (S. cerevisiae)                                                               | Cluster0217 |
| 1417351_a_at          | LOC100047155 /// Snrpa1                | similar to Small nuclear ribonucleoprotein polypeptide A /// small nuclear ribonucleoprotein polypeptide A | Cluster0217 |
| 1437194_x_at          | Lrwd1                                  | leucine-rich repeats and WD repeat domain containing 1                                                     | Cluster0217 |
| 1444952_a_at          | Nucks1                                 | nuclear casein kinase and cyclin-dependent kinase substrate 1                                              | Cluster0217 |
| 1436816_at            | Nup133                                 | nucleoporin 133                                                                                            | Cluster0217 |
| 1455546_s_at          | Sf3a2                                  | splicing factor 3a, subunit 2                                                                              | Cluster0217 |
| 1437024_at            | Smpd4                                  | sphingomyelin phosphodiesterase 4                                                                          | Cluster0217 |
| 1416794_at            | Atl2                                   | atlastin GTPase 2                                                                                          | Cluster0218 |
| 1431197_at            | Atl2                                   | atlastin GTPase 2                                                                                          | Cluster0218 |
| 1424513_at            | Atp6v0a2                               | ATPase, H+ transporting, lysosomal V0 subunit A2                                                           | Cluster0218 |

|              |                   |                                                                                                |             |
|--------------|-------------------|------------------------------------------------------------------------------------------------|-------------|
| 1431507_a_at | Cox16 /// Synj2bp | COX16 cytochrome c oxidase assembly homolog (S. cerevisiae) /// synaptojanin 2 binding protein | Cluster0218 |
| 1422432_at   | Dbi               | diazepam binding inhibitor                                                                     | Cluster0218 |
| 1431802_a_at | Ept1              | ethanolaminephosphotransferase 1 (CDP-ethanolamine-specific)                                   | Cluster0218 |
| 1432374_a_at | Ept1              | ethanolaminephosphotransferase 1 (CDP-ethanolamine-specific)                                   | Cluster0218 |
| 1453949_s_at | Lypla1            | lysophospholipase 1                                                                            | Cluster0218 |
| 1450113_at   | Mpp5              | membrane protein, palmitoylated 5 (MAGUK p55 subfamily member 5)                               | Cluster0218 |
| 1419268_at   | Agr2              | anterior gradient 2 (Xenopus laevis)                                                           | Cluster0219 |
| 1453352_at   | Atp10b            | ATPase, class V, type 10B                                                                      | Cluster0219 |
| 1419086_at   | Fgfbp1            | fibroblast growth factor binding protein 1                                                     | Cluster0219 |
| 1417156_at   | Krt19             | keratin 19                                                                                     | Cluster0219 |
| 1433891_at   | Lgr4              | leucine-rich repeat-containing G protein-coupled receptor 4                                    | Cluster0219 |
| 1434025_at   | NA                | ---                                                                                            | Cluster0219 |
| 1443053_at   | NA                | ---                                                                                            | Cluster0219 |
| 1451331_at   | Ppp1r1b           | protein phosphatase 1, regulatory (inhibitor) subunit 1B                                       | Cluster0219 |
| 1424052_at   | Thap4             | THAP domain containing 4                                                                       | Cluster0219 |
| 1426866_at   | Chst14            | carbohydrate (N-acetylgalactosamine 4-0) sulfotransferase 14                                   | Cluster0220 |
| 1419573_a_at | Lgals1            | lectin, galactose binding, soluble 1                                                           | Cluster0220 |
| 1455439_a_at | Lgals1            | lectin, galactose binding, soluble 1                                                           | Cluster0220 |
| 1422764_at   | Mapre1            | microtubule-associated protein, RP/EB family, member 1                                         | Cluster0220 |
| 1433883_at   | Tpm4              | tropomyosin 4                                                                                  | Cluster0220 |
| 1416431_at   | Tubb6             | tubulin, beta 6                                                                                | Cluster0220 |
| 1438118_x_at | Vim               | vimentin                                                                                       | Cluster0220 |
| 1450641_at   | Vim               | vimentin                                                                                       | Cluster0220 |
| 1456292_a_at | Vim               | vimentin                                                                                       | Cluster0220 |
| 1460171_at   | Cops5             | COP9 (constitutive photomorphogenic) homolog, subunit 5 (Arabidopsis thaliana)                 | Cluster0221 |
| 1417207_at   | Dvl2              | dishevelled 2, dsh homolog (Drosophila)                                                        | Cluster0221 |
| 1454765_at   | Gtf3c3            | general transcription factor IIIC, polypeptide 3                                               | Cluster0221 |
| 1429328_at   | Nsfl1c            | NSFL1 (p97) cofactor (p47)                                                                     | Cluster0221 |
| 1416291_at   | Psmc4             | proteasome (prosome, macropain) 26S subunit, ATPase, 4                                         | Cluster0221 |
| 1429291_at   | Psmc1             | proteasome (prosome, macropain) 26S subunit, non-ATPase, 1                                     | Cluster0221 |
| 1451056_at   | Psmc7             | proteasome (prosome, macropain) 26S subunit, non-ATPase, 7                                     | Cluster0221 |
| 1434448_at   | Txlna             | taxilin alpha                                                                                  | Cluster0221 |
| 1448311_at   | Usp5              | ubiquitin specific peptidase 5 (isopeptidase T)                                                | Cluster0221 |
| 1430749_at   | 2810040C05Rik     | RIKEN cDNA 2810040C05 gene                                                                     | Cluster0222 |
| 1454402_at   | 3110048L19Rik     | zinc finger pseudogene                                                                         | Cluster0222 |
| 1457891_at   | C230011H18Rik     | RIKEN cDNA C230011H18 gene                                                                     | Cluster0222 |
| 1457712_at   | Chd8              | chromodomain helicase DNA binding protein 8                                                    | Cluster0222 |
| 1447526_at   | D5Ert255e         | DNA segment, Chr 5, ERATO Doi 255, expressed                                                   | Cluster0222 |
| 1443074_at   | NA                | ---                                                                                            | Cluster0222 |
| 1458290_at   | NA                | ---                                                                                            | Cluster0222 |
| 1439917_at   | Pdzd8             | PDZ domain containing 8                                                                        | Cluster0222 |
| 1438454_at   | Pten              | phosphatase and tensin homolog                                                                 | Cluster0222 |
| 1433335_at   | 4930405G09Rik     | RIKEN cDNA 4930405G09 gene                                                                     | Cluster0223 |
| 1438052_at   | A130071D04Rik     | RIKEN cDNA A130071D04 gene                                                                     | Cluster0223 |
| 1431961_at   | Dock8             | dedicator of cytokinesis 8                                                                     | Cluster0223 |
| 1439226_at   | Dock8             | dedicator of cytokinesis 8                                                                     | Cluster0223 |
| 1445375_at   | Itsn2             | intersectin 2                                                                                  | Cluster0223 |
| 1437584_at   | NA                | ---                                                                                            | Cluster0223 |
| 1442262_at   | NA                | ---                                                                                            | Cluster0223 |
| 1446548_at   | NA                | ---                                                                                            | Cluster0223 |
| 1446567_at   | NA                | ---                                                                                            | Cluster0223 |
| 1431655_a_at | Agk               | acylglycerol kinase                                                                            | Cluster0224 |
| 1421042_at   | Arhgef2           | rho/rac guanine nucleotide exchange factor (GEF) 2                                             | Cluster0224 |
| 1427646_a_at | Arhgef2           | rho/rac guanine nucleotide exchange factor (GEF) 2                                             | Cluster0224 |
| 1453804_a_at | Orc4l             | origin recognition complex, subunit 4-like (S. cerevisiae)                                     | Cluster0224 |
| 1427956_at   | Pcgf1             | polycomb group ring finger 1                                                                   | Cluster0224 |
| 1419258_at   | Tcea1             | transcription elongation factor A (SII) 1                                                      | Cluster0224 |

|              |                       |                                                                                            |             |
|--------------|-----------------------|--------------------------------------------------------------------------------------------|-------------|
| 1425561_at   | Trnt1                 | tRNA nucleotidyl transferase, CCA-adding, 1                                                | Cluster0224 |
| 1431746_a_at | Uba3                  | ubiquitin-like modifier activating enzyme 3                                                | Cluster0224 |
| 1436382_at   | Zbtb12                | zinc finger and BTB domain containing 12                                                   | Cluster0224 |
| 1449718_s_at | 4930453N24Rik         | RIKEN cDNA 4930453N24 gene                                                                 | Cluster0225 |
| 1428502_at   | Actr6                 | ARP6 actin-related protein 6 homolog (yeast)                                               | Cluster0225 |
| 1424071_s_at | BC018507              | cDNA sequence BC018507                                                                     | Cluster0225 |
| 1460645_at   | Chordc1               | cysteine and histidine-rich domain (CHORD)-containing, zinc-binding protein 1              | Cluster0225 |
| 1428453_at   | Naa30                 | N(alpha)-acetyltransferase 30, NatC catalytic subunit                                      | Cluster0225 |
| 1441733_s_at | Nup153                | nucleoporin 153                                                                            | Cluster0225 |
| 1452176_at   | Nup153                | nucleoporin 153                                                                            | Cluster0225 |
| 1423371_at   | Pole4                 | polymerase (DNA-directed), epsilon 4 (p12 subunit)                                         | Cluster0225 |
| 1429047_at   | Rtf1                  | Rtf1, Paf1/RNA polymerase II complex component, homolog ( <i>S. cerevisiae</i> )           | Cluster0225 |
| 1415980_at   | Atp5g2                | ATP synthase, H+ transporting, mitochondrial F0 complex, subunit C2 (subunit 9)            | Cluster0226 |
| 1424018_at   | Hint1                 | histidine triad nucleotide binding protein 1                                               | Cluster0226 |
| 1451307_at   | Mrp14                 | mitochondrial ribosomal protein L14                                                        | Cluster0226 |
| 1422976_x_at | Ndufa7                | NADH dehydrogenase (ubiquinone) 1 alpha subcomplex, 7 (B14.5a)                             | Cluster0226 |
| 1428360_x_at | Ndufa7                | NADH dehydrogenase (ubiquinone) 1 alpha subcomplex, 7 (B14.5a)                             | Cluster0226 |
| 1436567_a_at | Ndufa7                | NADH dehydrogenase (ubiquinone) 1 alpha subcomplex, 7 (B14.5a)                             | Cluster0226 |
| 1450818_a_at | Ndufa7                | NADH dehydrogenase (ubiquinone) 1 alpha subcomplex, 7 (B14.5a)                             | Cluster0226 |
| 1423090_x_at | Sec61g                | SEC61, gamma subunit                                                                       | Cluster0226 |
| 1424912_at   | Slc25a17              | solute carrier family 25 (mitochondrial carrier, peroxisomal membrane protein), member 17  | Cluster0226 |
| 1433269_at   | 4930553M12Rik         | RIKEN cDNA 4930553M12 gene                                                                 | Cluster0227 |
| 1430914_at   | 5330426L24Rik         | RIKEN cDNA 5330426L24 gene                                                                 | Cluster0227 |
| 1425690_at   | B3gat1                | beta-1,3-glucuronyltransferase 1 (glucuronosyltransferase P)                               | Cluster0227 |
| 1446501_at   | Bhlha9                | basic helix-loop-helix family, member a9                                                   | Cluster0227 |
| 1438341_at   | LOC100047179 /// Tgm4 | similar to experimental autoimmune prostatitis antigen 1 /// transglutaminase 4 (prostate) | Cluster0227 |
| 1420232_at   | NA                    | ---                                                                                        | Cluster0227 |
| 1459097_at   | NA                    | ---                                                                                        | Cluster0227 |
| 1418882_at   | Nlrp5                 | NLR family, pyrin domain containing 5                                                      | Cluster0227 |
| 1457603_at   | Ppp1r9a               | protein phosphatase 1, regulatory (inhibitor) subunit 9A                                   | Cluster0227 |
| 1428291_at   | Exosc8                | exosome component 8                                                                        | Cluster0228 |
| 1418727_at   | Nup155                | nucleoporin 155                                                                            | Cluster0228 |
| 1449200_at   | Nup155                | nucleoporin 155                                                                            | Cluster0228 |
| 1454743_at   | Nup205                | nucleoporin 205                                                                            | Cluster0228 |
| 1416073_a_at | Nup85                 | nucleoporin 85                                                                             | Cluster0228 |
| 1417037_at   | Orc6l                 | origin recognition complex, subunit 6-like ( <i>S. cerevisiae</i> )                        | Cluster0228 |
| 1423539_at   | Pms2                  | postmeiotic segregation increased 2 ( <i>S. cerevisiae</i> )                               | Cluster0228 |
| 1448369_at   | Pola2                 | polymerase (DNA directed), alpha 2                                                         | Cluster0228 |
| 1425271_at   | Psmc3ip               | proteasome (prosome, macropain) 26S subunit, ATPase 3, interacting protein                 | Cluster0228 |
| 1441911_x_at | Gart                  | phosphoribosylglycinamide formyltransferase                                                | Cluster0229 |
| 1447728_x_at | Hspa9                 | heat shock protein 9                                                                       | Cluster0229 |
| 1438938_x_at | Phb2                  | prohibitin 2                                                                               | Cluster0229 |
| 1447750_x_at | Pih1d1                | PIH1 domain containing 1                                                                   | Cluster0229 |
| 1438955_x_at | Ppif                  | peptidylprolyl isomerase F (cyclophilin F)                                                 | Cluster0229 |
| 1455800_x_at | Samm50                | sorting and assembly machinery component 50 homolog ( <i>S. cerevisiae</i> )               | Cluster0229 |
| 1455801_x_at | Tbcd                  | tubulin-specific chaperone d                                                               | Cluster0229 |
| 1434420_x_at | Tommm22               | translocase of outer mitochondrial membrane 22 homolog (yeast)                             | Cluster0229 |
| 1437379_x_at | Trap1                 | TNF receptor-associated protein 1                                                          | Cluster0229 |
| 1450071_at   | Ash1l                 | ash1 (absent, small, or homeotic)-like ( <i>Drosophila</i> )                               | Cluster0230 |
| 1455567_at   | Cdk12                 | cyclin-dependent kinase 12                                                                 | Cluster0230 |
| 1442855_at   | Dopey1                | dopey family member 1                                                                      | Cluster0230 |
| 1444651_at   | LOC553089             | hypothetical LOC553089                                                                     | Cluster0230 |
| 1441442_at   | NA                    | ---                                                                                        | Cluster0230 |
| 1444048_at   | NA                    | ---                                                                                        | Cluster0230 |
| 1459887_at   | NA                    | ---                                                                                        | Cluster0230 |
| 1460104_at   | Vps4b                 | vacuolar protein sorting 4b (yeast)                                                        | Cluster0230 |
| 1426417_at   | Yipf4                 | Yip1 domain family, member 4                                                               | Cluster0230 |



|              |                       |                                                                                          |             |
|--------------|-----------------------|------------------------------------------------------------------------------------------|-------------|
| 1438311_at   | 2010002M12Rik         | RIKEN cDNA 2010002M12 gene                                                               | Cluster0231 |
| 1432212_at   | A1cf                  | APOBEC1 complementation factor                                                           | Cluster0231 |
| 1440447_at   | Abhd2                 | abhydrolase domain containing 2                                                          | Cluster0231 |
| 1418278_at   | Apoc3                 | apolipoprotein C-III                                                                     | Cluster0231 |
| 1425712_at   | BC025446              | cDNA sequence BC025446                                                                   | Cluster0231 |
| 1451964_at   | Mia2                  | melanoma inhibitory activity 2                                                           | Cluster0231 |
| 1453283_at   | Pgm1                  | phosphoglucomutase 1                                                                     | Cluster0231 |
| 1419167_at   | Prap1                 | proline-rich acidic protein 1                                                            | Cluster0231 |
| 1424962_at   | Tm4sf4                | transmembrane 4 superfamily member 4                                                     | Cluster0231 |
| 1457673_at   | 2610005L07Rik         | cadherin 11 pseudogene                                                                   | Cluster0232 |
| 1445258_at   | Gm4515                | Predicted gene 4515                                                                      | Cluster0232 |
| 1442244_at   | Inadl                 | InaD-like (Drosophila)                                                                   | Cluster0232 |
| 1446607_at   | Mtap7                 | Microtubule-associated protein 7                                                         | Cluster0232 |
| 1440749_at   | NA                    | ---                                                                                      | Cluster0232 |
| 1434303_at   | Raph1                 | Ras association (RalGDS/AF-6) and pleckstrin homology domains 1                          | Cluster0232 |
| 1456918_at   | Raph1                 | Ras association (RalGDS/AF-6) and pleckstrin homology domains 1                          | Cluster0232 |
| 1449027_at   | Rhou                  | ras homolog gene family, member U                                                        | Cluster0232 |
| 1439494_at   | Slc5a9                | solute carrier family 5 (sodium/glucose cotransporter), member 9                         | Cluster0232 |
| 1432340_at   | 1700121N20Rik         | RIKEN cDNA 1700121N20 gene                                                               | Cluster0233 |
| 1432736_at   | 4933430H06Rik         | RIKEN cDNA 4933430H06 gene                                                               | Cluster0233 |
| 1453671_at   | 9430041J12Rik         | RIKEN cDNA 9430041J12 gene                                                               | Cluster0233 |
| 1421659_at   | Adra1a                | adrenergic receptor, alpha 1a                                                            | Cluster0233 |
| 1419713_at   | Atp8b3                | ATPase, class I, type 8B, member 3                                                       | Cluster0233 |
| 1443502_at   | Birc7                 | baculoviral IAP repeat-containing 7 (livin)                                              | Cluster0233 |
| 1440211_at   | Cyp2j11               | cytochrome P450, family 2, subfamily j, polypeptide 11                                   | Cluster0233 |
| 1421361_at   | Grk1 /// LOC100045507 | G protein-coupled receptor kinase 1 /// similar to rhodopsin kinase                      | Cluster0233 |
| 1443139_at   | NA                    | ---                                                                                      | Cluster0233 |
| 1446272_at   | Cdk17                 | cyclin-dependent kinase 17                                                               | Cluster0234 |
| 1437282_at   | NA                    | ---                                                                                      | Cluster0234 |
| 1439686_at   | NA                    | ---                                                                                      | Cluster0234 |
| 1440014_at   | NA                    | ---                                                                                      | Cluster0234 |
| 1443534_at   | NA                    | ---                                                                                      | Cluster0234 |
| 1444741_at   | NA                    | ---                                                                                      | Cluster0234 |
| 1445106_at   | NA                    | ---                                                                                      | Cluster0234 |
| 1459382_at   | NA                    | ---                                                                                      | Cluster0234 |
| 1437203_at   | Cbll1                 | Casitas B-lineage lymphoma-like 1                                                        | Cluster0235 |
| 1436914_at   | Ctdspl2               | CTD (carboxy-terminal domain, RNA polymerase II, polypeptide A) small phosphatase like 2 | Cluster0235 |
| 1419370_a_at | Mfap1a                | microfibrillar-associated protein 1A                                                     | Cluster0235 |
| 1449445_x_at | Mfap1a                | microfibrillar-associated protein 1A                                                     | Cluster0235 |
| 1436588_at   | Rtttn                 | rotatin                                                                                  | Cluster0235 |
| 1423360_at   | Yme1l1                | YME1-like 1 (S. cerevisiae)                                                              | Cluster0235 |
| 1428170_at   | Zfp180                | zinc finger protein 180                                                                  | Cluster0235 |
| 1434461_at   | Zfp715                | zinc finger protein 715                                                                  | Cluster0235 |
| 1432364_at   | 4930556N13Rik         | RIKEN cDNA 4930556N13 gene                                                               | Cluster0236 |
| 1430898_s_at | 4931428L18Rik         | RIKEN cDNA 4931428L18 gene                                                               | Cluster0236 |
| 1433245_at   | 6720475M21Rik         | RIKEN cDNA 6720475M21 gene                                                               | Cluster0236 |
| 1421363_at   | Cyp2c39               | cytochrome P450, family 2, subfamily c, polypeptide 39                                   | Cluster0236 |
| 1455457_at   | Cyp2c54               | cytochrome P450, family 2, subfamily c, polypeptide 54                                   | Cluster0236 |
| 1433069_at   | NA                    | ---                                                                                      | Cluster0236 |
| 1446436_at   | NA                    | ---                                                                                      | Cluster0236 |
| 1432819_at   | Prcc1                 | proline-rich coiled-coil 1                                                               | Cluster0236 |
| 1416867_at   | Bet1                  | blocked early in transport 1 homolog (S. cerevisiae)                                     | Cluster0237 |
| 1450895_a_at | Cox16                 | COX16 cytochrome c oxidase assembly homolog (S. cerevisiae)                              | Cluster0237 |
| 1435276_a_at | Dgcr2                 | DiGeorge syndrome critical region gene 2                                                 | Cluster0237 |
| 1421845_at   | Golph3                | golgi phosphoprotein 3                                                                   | Cluster0237 |
| 1430777_a_at | Golph3                | golgi phosphoprotein 3                                                                   | Cluster0237 |
| 1432472_a_at | Mccc2                 | methylcrotonoyl-Coenzyme A carboxylase 2 (beta)                                          | Cluster0237 |

|              |                                           |                                                                                                        |             |
|--------------|-------------------------------------------|--------------------------------------------------------------------------------------------------------|-------------|
| 1422879_at   | Sypl                                      | synaptophysin-like protein                                                                             | Cluster0237 |
| 1448375_at   | Tm9sf3                                    | transmembrane 9 superfamily member 3                                                                   | Cluster0237 |
| 1441190_at   | Arpc5l                                    | actin related protein 2/3 complex, subunit 5-like                                                      | Cluster0238 |
| 1440440_at   | NA                                        | ---                                                                                                    | Cluster0238 |
| 1443435_at   | NA                                        | ---                                                                                                    | Cluster0238 |
| 1446570_at   | NA                                        | ---                                                                                                    | Cluster0238 |
| 1447546_s_at | NA                                        | ---                                                                                                    | Cluster0238 |
| 1460352_s_at | Pik3r4                                    | phosphatidylinositol 3 kinase, regulatory subunit, polypeptide 4, p150                                 | Cluster0238 |
| 1440846_at   | Scai                                      | suppressor of cancer cell invasion                                                                     | Cluster0238 |
| 1460069_at   | Smc6                                      | structural maintenance of chromosomes 6                                                                | Cluster0238 |
| 1454563_at   | 4930573C08Rik                             | RIKEN cDNA 4930573C08 gene                                                                             | Cluster0239 |
| 1432730_at   | 5830415G21Rik                             | RIKEN cDNA 5830415G21 gene                                                                             | Cluster0239 |
| 1432392_at   | Kif2c                                     | kinesin family member 2C                                                                               | Cluster0239 |
| 1453580_at   | Mettl13                                   | methyltransferase like 13                                                                              | Cluster0239 |
| 1443577_at   | NA                                        | ---                                                                                                    | Cluster0239 |
| 1444099_at   | NA                                        | ---                                                                                                    | Cluster0239 |
| 1449758_at   | NA                                        | ---                                                                                                    | Cluster0239 |
| 1443152_at   | Ptcd3                                     | pentatricopeptide repeat domain 3                                                                      | Cluster0239 |
| 1454364_at   | 9530025L08Rik                             | RIKEN cDNA 9530025L08 gene                                                                             | Cluster0240 |
| 1435894_at   | C030014L02                                | hypothetical protein C030014L02                                                                        | Cluster0240 |
| 1445234_at   | C130030K03Rik                             | RIKEN cDNA C130030K03 gene                                                                             | Cluster0240 |
| 1436467_at   | D230004N17Rik                             | RIKEN cDNA D230004N17 gene                                                                             | Cluster0240 |
| 1436529_at   | Gpr123                                    | G protein-coupled receptor 123                                                                         | Cluster0240 |
| 1443306_at   | NA                                        | ---                                                                                                    | Cluster0240 |
| 1424228_at   | Polr3h                                    | polymerase (RNA) III (DNA directed) polypeptide H                                                      | Cluster0240 |
| 1455122_at   | Ptchd2                                    | patched domain containing 2                                                                            | Cluster0240 |
| 1444132_at   | 2310003H01Rik                             | RIKEN cDNA 2310003H01 gene                                                                             | Cluster0241 |
| 1442487_at   | D14Ert24e                                 | DNA segment, Chr 14, ERATO Doi 24, expressed                                                           | Cluster0241 |
| 1425938_a_at | Fkbp11                                    | FK506 binding protein 11                                                                               | Cluster0241 |
| 1444838_at   | Gm9946                                    | predicted gene 9946                                                                                    | Cluster0241 |
| 1427211_at   | Krtap8-1                                  | keratin associated protein 8-1                                                                         | Cluster0241 |
| 1432811_at   | NA                                        | ---                                                                                                    | Cluster0241 |
| 1449208_at   | Papalb                                    | poly (A) polymerase beta (testis specific)                                                             | Cluster0241 |
| 1420771_at   | Sprr2d                                    | small proline-rich protein 2D                                                                          | Cluster0241 |
| 1455232_at   | Cml2                                      | camello-like 2                                                                                         | Cluster0242 |
| 1423404_at   | Gkn1                                      | gastrokine 1                                                                                           | Cluster0242 |
| 1437340_x_at | Gkn1                                      | gastrokine 1                                                                                           | Cluster0242 |
| 1453132_a_at | Gkn2                                      | gastrokine 2                                                                                           | Cluster0242 |
| 1419504_at   | LOC100047046 /// Mogat1                   | similar to monoacylglycerol O-acyltransferase 1 /// monoacylglycerol O-acyltransferase 1               | Cluster0242 |
| 1431899_at   | Nkx6-3                                    | NK6 homeobox 3                                                                                         | Cluster0242 |
| 1419615_at   | Trpv6                                     | transient receptor potential cation channel, subfamily V, member 6                                     | Cluster0242 |
| 1423397_at   | Ugt2b38                                   | UDP glucuronosyltransferase 2 family, polypeptide B38                                                  | Cluster0242 |
| 1421547_at   | Cd180                                     | CD180 antigen                                                                                          | Cluster0243 |
| 1454268_a_at | Cyba                                      | cytochrome b-245, alpha polypeptide                                                                    | Cluster0243 |
| 1420464_s_at | Gm10693 /// Gm15448 /// Lilra6 /// Lilrb: | predicted pseudogene 10693 /// predicted gene 15448 /// leukocyte immunoglobulin-like receptor, subfar | Cluster0243 |
| 1460257_a_at | Gm2382 /// Mthfs                          | predicted gene 2382 /// 5, 10-methenyltetrahydrofolate synthetase                                      | Cluster0243 |
| 1460231_at   | Irf5                                      | interferon regulatory factor 5                                                                         | Cluster0243 |
| 1427103_at   | Plekho2                                   | pleckstrin homology domain containing, family O member 2                                               | Cluster0243 |
| 1420823_at   | Sema4d                                    | sema domain, immunoglobulin domain (Ig), transmembrane domain (TM) and short cytoplasmic domain, (     | Cluster0243 |
| 1448328_at   | Sh3bp2                                    | SH3-domain binding protein 2                                                                           | Cluster0243 |
| 1430714_at   | 4930451C15Rik                             | RIKEN cDNA 4930451C15 gene                                                                             | Cluster0244 |
| 1454348_at   | 4933407C09Rik                             | RIKEN cDNA 4933407C09 gene                                                                             | Cluster0244 |
| 1430921_at   | 9130015G15Rik                             | RIKEN cDNA 9130015G15 gene                                                                             | Cluster0244 |
| 1426520_at   | Btg4                                      | B-cell translocation gene 4                                                                            | Cluster0244 |
| 1446236_at   | C230072F16Rik                             | RIKEN cDNA C230072F16 gene                                                                             | Cluster0244 |
| 1449771_at   | NA                                        | ---                                                                                                    | Cluster0244 |
| 1427403_at   | Slco1a5                                   | solute carrier organic anion transporter family, member 1a5                                            | Cluster0244 |

|              |                          |                                                                                                      |             |
|--------------|--------------------------|------------------------------------------------------------------------------------------------------|-------------|
| 1437609_at   | Ube2u                    | ubiquitin-conjugating enzyme E2U (putative)                                                          | Cluster0244 |
| 1417797_a_at | 1810019J16Rik            | RIKEN cDNA 1810019J16 gene                                                                           | Cluster0245 |
| 1452861_at   | 2010300C02Rik            | RIKEN cDNA 2010300C02 gene                                                                           | Cluster0245 |
| 1450896_at   | Arhgap5                  | Rho GTPase activating protein 5                                                                      | Cluster0245 |
| 1417507_at   | Cyb561                   | cytochrome b-561                                                                                     | Cluster0245 |
| 1428283_at   | Cyp2s1                   | cytochrome P450, family 2, subfamily s, polypeptide 1                                                | Cluster0245 |
| 1416271_at   | Perp                     | PERP, TP53 apoptosis effector                                                                        | Cluster0245 |
| 1438968_x_at | Spint2                   | serine protease inhibitor, Kunitz type 2                                                             | Cluster0245 |
| 1423295_at   | Tm9sf2                   | transmembrane 9 superfamily member 2                                                                 | Cluster0245 |
| 1460483_at   | 2610034E01Rik            | RIKEN cDNA 2610034E01 gene                                                                           | Cluster0246 |
| 1425154_a_at | Csf1                     | colony stimulating factor 1 (macrophage)                                                             | Cluster0246 |
| 1448914_a_at | Csf1                     | colony stimulating factor 1 (macrophage)                                                             | Cluster0246 |
| 1426024_a_at | Dbn1                     | drebrin 1                                                                                            | Cluster0246 |
| 1451734_a_at | Dbn1                     | drebrin 1                                                                                            | Cluster0246 |
| 1439888_at   | NA                       | ---                                                                                                  | Cluster0246 |
| 1425126_at   | Ncam1                    | neural cell adhesion molecule 1                                                                      | Cluster0246 |
| 1449577_x_at | Tpm2                     | tropomyosin 2, beta                                                                                  | Cluster0246 |
| 1433817_at   | Agpat3                   | 1-acylglycerol-3-phosphate O-acyltransferase 3                                                       | Cluster0247 |
| 1433819_s_at | Agpat3                   | 1-acylglycerol-3-phosphate O-acyltransferase 3                                                       | Cluster0247 |
| 1424400_a_at | Aldh111 /// LOC100047937 | aldehyde dehydrogenase 1 family, member L1 /// similar to Aldehyde dehydrogenase 1 family, member L1 | Cluster0247 |
| 1423936_at   | Kctd5                    | potassium channel tetramerisation domain containing 5                                                | Cluster0247 |
| 1448978_at   | Ngef                     | neuronal guanine nucleotide exchange factor                                                          | Cluster0247 |
| 1436458_at   | Sema6a                   | sema domain, transmembrane domain (TM), and cytoplasmic domain, (semaphorin) 6A                      | Cluster0247 |
| 1460684_at   | Tm7sf2                   | transmembrane 7 superfamily member 2                                                                 | Cluster0247 |
| 1452977_at   | Zhx3                     | zinc fingers and homeoboxes 3                                                                        | Cluster0247 |
| 1439183_at   | Acer1                    | alkaline ceramidase 1                                                                                | Cluster0248 |
| 1419922_s_at | Atrnl1                   | attractin like 1                                                                                     | Cluster0248 |
| 1436030_at   | Cachd1                   | cache domain containing 1                                                                            | Cluster0248 |
| 1445574_at   | NA                       | ---                                                                                                  | Cluster0248 |
| 1435991_at   | Nr3c2                    | nuclear receptor subfamily 3, group C, member 2                                                      | Cluster0248 |
| 1450699_at   | Selenbp1                 | selenium binding protein 1                                                                           | Cluster0248 |
| 1444507_at   | Usp53                    | ubiquitin specific peptidase 53                                                                      | Cluster0248 |
| 1458899_at   | Usp53                    | ubiquitin specific peptidase 53                                                                      | Cluster0248 |
| 1429837_at   | 1700016D18Rik            | RIKEN cDNA 1700016D18 gene                                                                           | Cluster0249 |
| 1429365_at   | 1700016M24Rik            | RIKEN cDNA 1700016M24 gene                                                                           | Cluster0249 |
| 1446321_at   | B230208B08Rik            | RIKEN cDNA B230208B08 gene                                                                           | Cluster0249 |
| 1439277_at   | Gm14873                  | predicted gene 14873                                                                                 | Cluster0249 |
| 1432930_at   | Gsdmcl2                  | gasdermin C-like 2                                                                                   | Cluster0249 |
| 1443304_at   | Mtl5                     | metallothionein-like 5, testis-specific (tesmin)                                                     | Cluster0249 |
| 1443316_at   | NA                       | ---                                                                                                  | Cluster0249 |
| 1420791_x_at | Speer4f                  | spermatogenesis associated glutamate (E)-rich protein 4f                                             | Cluster0249 |
| 1451746_a_at | Atg12                    | autophagy-related 12 (yeast)                                                                         | Cluster0250 |
| 1453751_at   | Dhx38                    | DEAH (Asp-Glu-Ala-His) box polypeptide 38                                                            | Cluster0250 |
| 1439160_at   | Pramef8                  | PRAME family member 8                                                                                | Cluster0250 |
| 1425487_at   | Slu7                     | SLU7 splicing factor homolog (S. cerevisiae)                                                         | Cluster0250 |
| 1425488_at   | Slu7                     | SLU7 splicing factor homolog (S. cerevisiae)                                                         | Cluster0250 |
| 1429003_at   | Snw1                     | SNW domain containing 1                                                                              | Cluster0250 |
| 1451158_at   | Trip12                   | thyroid hormone receptor interactor 12                                                               | Cluster0250 |
| 1437888_at   | Wnk1                     | WNK lysine deficient protein kinase 1                                                                | Cluster0250 |
| 1448903_at   |                          | Sep-15 selenoprotein                                                                                 | Cluster0251 |
| 1433539_at   | Commdd3                  | COMM domain containing 3                                                                             | Cluster0251 |
| 1454642_a_at | Commdd3                  | COMM domain containing 3                                                                             | Cluster0251 |
| 1424710_a_at | Gorasp2                  | golgi reassembly stacking protein 2                                                                  | Cluster0251 |
| 1449139_at   | Ostc                     | oligosaccharyltransferase complex subunit                                                            | Cluster0251 |
| 1428335_a_at | Scfd1                    | Sec1 family domain containing 1                                                                      | Cluster0251 |
| 1416220_at   | Spccs1                   | signal peptidase complex subunit 1 homolog (S. cerevisiae)                                           | Cluster0251 |
| 1448268_at   | Tmed9                    | transmembrane emp24 protein transport domain containing 9                                            | Cluster0251 |

|              |                        |                                                              |             |
|--------------|------------------------|--------------------------------------------------------------|-------------|
| 1421310_at   | 4921517D21Rik          | RIKEN cDNA 4921517D21 gene                                   | Cluster0252 |
| 1460505_at   | 8030442B05Rik          | RIKEN cDNA 8030442B05 gene                                   | Cluster0252 |
| 1457187_at   | A630071L07Rik          | RIKEN cDNA A630071L07 gene                                   | Cluster0252 |
| 1459932_at   | D8Ert28e               | DNA segment, Chr 8, ERATO Doi 28, expressed                  | Cluster0252 |
| 1440957_at   | Defb29                 | defensin beta 29                                             | Cluster0252 |
| 1422829_at   | Drd4                   | dopamine receptor 4                                          | Cluster0252 |
| 1432981_at   | LOC100044624           | similar to mixed lineage kinase MLK1                         | Cluster0252 |
| 1450345_at   | Ubqln1                 | ubiquilin 1                                                  | Cluster0252 |
| 1428298_at   | 1700029G01Rik          | RIKEN cDNA 1700029G01 gene                                   | Cluster0253 |
| 1418979_at   | Akr1c14                | aldo-keto reductase family 1, member C14                     | Cluster0253 |
| 1449949_a_at | Cxadr                  | coxsackie virus and adenovirus receptor                      | Cluster0253 |
| 1423244_at   | Cyp2c68                | cytochrome P450, family 2, subfamily c, polypeptide 68       | Cluster0253 |
| 1441622_at   | Gm5485                 | predicted gene 5485                                          | Cluster0253 |
| 1454247_a_at | Gpa33                  | glycoprotein A33 (transmembrane)                             | Cluster0253 |
| 1418931_at   | Reg4                   | regenerating islet-derived family, member 4                  | Cluster0253 |
| 1425002_at   | Sectm1a                | secreted and transmembrane 1A                                | Cluster0253 |
| 1436170_a_at | Csn1s2a                | casein alpha s2-like A                                       | Cluster0254 |
| 1460383_at   | Gnao1                  | guanine nucleotide binding protein, alpha O                  | Cluster0254 |
| 1418056_at   | lqcf3                  | IQ motif containing F3                                       | Cluster0254 |
| 1453249_a_at | LOC100048071 /// Tex21 | similar to tsec-2 /// testis expressed gene 21               | Cluster0254 |
| 1457610_at   | NA                     | ---                                                          | Cluster0254 |
| 1422035_at   | Serpinb9c              | serine (or cysteine) peptidase inhibitor, clade B, member 9c | Cluster0254 |
| 1431048_at   | Styx                   | serine/threonine/tyrosine interaction protein                | Cluster0254 |
| 1435205_at   | Tcfap2e                | transcription factor AP-2, epsilon                           | Cluster0254 |
| 1432825_at   | 2900018N21Rik          | RIKEN cDNA 2900018N21 gene                                   | Cluster0255 |
| 1421937_at   | Dapp1                  | dual adaptor for phosphotyrosine and 3-phosphoinositides 1   | Cluster0255 |
| 1443260_at   | Meis1                  | Meis homeobox 1                                              | Cluster0255 |
| 1450992_a_at | Meis1                  | Meis homeobox 1                                              | Cluster0255 |
| 1459423_at   | Meis1                  | Meis homeobox 1                                              | Cluster0255 |
| 1440431_at   | NA                     | ---                                                          | Cluster0255 |
| 1441774_at   | NA                     | ---                                                          | Cluster0255 |
| 1459512_at   | NA                     | ---                                                          | Cluster0255 |
| 1419816_s_at | Errfi1                 | ERBB receptor feedback inhibitor 1                           | Cluster0256 |
| 1418678_at   | Has2                   | hyaluronan synthase 2                                        | Cluster0256 |
| 1449169_at   | Has2                   | hyaluronan synthase 2                                        | Cluster0256 |
| 1426037_a_at | Rgs16                  | regulator of G-protein signaling 16                          | Cluster0256 |
| 1451452_a_at | Rgs16                  | regulator of G-protein signaling 16                          | Cluster0256 |
| 1419149_at   | Serpine1               | serine (or cysteine) peptidase inhibitor, clade E, member 1  | Cluster0256 |
| 1431116_at   | Tmem200a               | transmembrane protein 200A                                   | Cluster0256 |
| 1436304_at   | Tmem200a               | transmembrane protein 200A                                   | Cluster0256 |
| 1420491_at   | Eif2s1                 | eukaryotic translation initiation factor 2, subunit 1 alpha  | Cluster0257 |
| 1424938_at   | Steap1                 | six transmembrane epithelial antigen of the prostate 1       | Cluster0257 |
| 1451532_s_at | Steap1                 | six transmembrane epithelial antigen of the prostate 1       | Cluster0257 |
| 1428636_at   | Steap2                 | six transmembrane epithelial antigen of prostate 2           | Cluster0257 |
| 1438773_at   | Steap2                 | six transmembrane epithelial antigen of prostate 2           | Cluster0257 |
| 1442359_at   | Steap2                 | six transmembrane epithelial antigen of prostate 2           | Cluster0257 |
| 1444290_at   | Steap2                 | six transmembrane epithelial antigen of prostate 2           | Cluster0257 |
| 1446071_at   | Steap2                 | six transmembrane epithelial antigen of prostate 2           | Cluster0257 |
| 1419605_at   | Clec10a                | C-type lectin domain family 10, member A                     | Cluster0258 |
| 1446745_at   | Gm5547                 | predicted gene 5547                                          | Cluster0258 |
| 1439067_at   | Lair1                  | leukocyte-associated Ig-like receptor 1                      | Cluster0258 |
| 1444040_at   | Lair1                  | leukocyte-associated Ig-like receptor 1                      | Cluster0258 |
| 1442988_at   | NA                     | ---                                                          | Cluster0258 |
| 1443777_at   | NA                     | ---                                                          | Cluster0258 |
| 1421800_at   | Phxr1                  | per-hexamer repeat gene 1                                    | Cluster0258 |
| 1439181_at   | Zfp658                 | zinc finger protein 658                                      | Cluster0258 |
| 1434152_at   | Apol7c /// Gm8221      | apolipoprotein L 7c /// apolipoprotein L, 3-like             | Cluster0259 |

|                |                                     |                                                                                                  |             |
|----------------|-------------------------------------|--------------------------------------------------------------------------------------------------|-------------|
| 1453076_at     | Batf3                               | basic leucine zipper transcription factor, ATF-like 3                                            | Cluster0259 |
| 1418652_at     | Cxcl9                               | chemokine (C-X-C motif) ligand 9                                                                 | Cluster0259 |
| 1421056_at     | Dnase1l3                            | deoxyribonuclease 1-like 3                                                                       | Cluster0259 |
| 1421057_at     | Dnase1l3                            | deoxyribonuclease 1-like 3                                                                       | Cluster0259 |
| 1441887_x_at   | Gm6377                              | predicted gene 6377                                                                              | Cluster0259 |
| 1434008_at     | Scn4b                               | sodium channel, type IV, beta                                                                    | Cluster0259 |
| 1455015_at     | Tbc1d9                              | TBC1 domain family, member 9                                                                     | Cluster0259 |
| 1432689_at     | 4631422I05Rik                       | RIKEN cDNA 4631422I05 gene                                                                       | Cluster0260 |
| 1454461_at     | 5830433M15Rik                       | RIKEN cDNA 5830433M15 gene                                                                       | Cluster0260 |
| 1424856_at     | Atp1a3                              | ATPase, Na <sup>+</sup> /K <sup>+</sup> transporting, alpha 3 polypeptide                        | Cluster0260 |
| 1457838_at     | Cdc45                               | cell division cycle 45 homolog (S. cerevisiae)                                                   | Cluster0260 |
| 1441919_x_at   | Crat                                | carnitine acetyltransferase                                                                      | Cluster0260 |
| 1443317_at     | D6Ert47e                            | DNA segment, Chr 6, ERATO Doi 47, expressed                                                      | Cluster0260 |
| 1445382_at     | NA                                  | ---                                                                                              | Cluster0260 |
| 1454479_at     | NA                                  | ---                                                                                              | Cluster0260 |
| 1431997_at     | 3000002C10Rik                       | glyceraldehyde-3-phosphate dehydrogenase pseudogene                                              | Cluster0261 |
| 1418625_s_at   | 3000002C10Rik /// Gapdh /// Gm10284 | glyceraldehyde-3-phosphate dehydrogenase pseudogene /// glyceraldehyde-3-phosphate dehydrogenase | Cluster0261 |
| 1419023_x_at   | Eno1                                | enolase 1, alpha non-neuron                                                                      | Cluster0261 |
| 1419022_a_at   | Eno1 /// Gm5506 /// Gm5855          | enolase 1, alpha non-neuron /// predicted gene 5506 /// enolase 1, alpha non-neuron pseudogene   | Cluster0261 |
| 1427404_x_at   | Eno1 /// Gm5506 /// LOC100047043    | enolase 1, alpha non-neuron /// predicted gene 5506 /// similar to enolase 1, alpha non-neuron   | Cluster0261 |
| AFFX-DapX-3_at | NA                                  | ---                                                                                              | Cluster0261 |
| AFFX-DapX-M_at | NA                                  | ---                                                                                              | Cluster0261 |
| 1417308_at     | Pkm2                                | pyruvate kinase, muscle                                                                          | Cluster0261 |
| 1454532_at     | C030043A13Rik                       | RIKEN cDNA C030043A13 gene                                                                       | Cluster0262 |
| 1446693_at     | Frg1                                | FSHD region gene 1                                                                               | Cluster0262 |
| 1441239_at     | Kctd18                              | potassium channel tetramerisation domain containing 18                                           | Cluster0262 |
| 1457630_at     | NA                                  | ---                                                                                              | Cluster0262 |
| 1458765_at     | Rbm10                               | RNA binding motif protein 10                                                                     | Cluster0262 |
| 1453371_at     | Rprd2                               | regulation of nuclear pre-mRNA domain containing 2                                               | Cluster0262 |
| 1430592_at     | Tmem106b                            | transmembrane protein 106B                                                                       | Cluster0262 |
| 1424645_at     | Tnrc6c                              | trinucleotide repeat containing 6C                                                               | Cluster0262 |
| 1443399_at     | AU021001                            | expressed sequence AU021001                                                                      | Cluster0263 |
| 1429903_at     | Dpf2                                | D4, zinc and double PHD fingers family 2                                                         | Cluster0263 |
| 1437126_at     | NA                                  | ---                                                                                              | Cluster0263 |
| 1437896_at     | NA                                  | ---                                                                                              | Cluster0263 |
| 1442078_at     | NA                                  | ---                                                                                              | Cluster0263 |
| 1444764_at     | NA                                  | ---                                                                                              | Cluster0263 |
| 1445533_at     | NA                                  | ---                                                                                              | Cluster0263 |
| 1459704_at     | NA                                  | ---                                                                                              | Cluster0263 |
| 1455537_at     | 6430547I21Rik                       | RIKEN cDNA 6430547I21 gene                                                                       | Cluster0264 |
| 1435318_at     | E130218I03Rik                       | RIKEN cDNA E130218I03 gene                                                                       | Cluster0264 |
| 1455460_at     | Gm2612                              | Predicted gene 2612                                                                              | Cluster0264 |
| 1460212_at     | Gnat1                               | guanine nucleotide binding protein, alpha transducing 1                                          | Cluster0264 |
| 1449179_at     | Pdc                                 | phosducin                                                                                        | Cluster0264 |
| 1451618_at     | Rho                                 | rhodopsin                                                                                        | Cluster0264 |
| 1424963_at     | Rp1                                 | retinitis pigmentosa 1 (human)                                                                   | Cluster0264 |
| 1451647_at     | Slc24a1                             | solute carrier family 24 (sodium/potassium/calcium exchanger), member 1                          | Cluster0264 |
| 1419722_at     | Klk8                                | kallikrein related-peptidase 8                                                                   | Cluster0265 |
| 1439309_at     | NA                                  | ---                                                                                              | Cluster0265 |
| 1457596_at     | NA                                  | ---                                                                                              | Cluster0265 |
| 1459595_at     | NA                                  | ---                                                                                              | Cluster0265 |
| 1437249_at     | Skap1                               | src family associated phosphoprotein 1                                                           | Cluster0265 |
| 1440782_at     | Skap1                               | src family associated phosphoprotein 1                                                           | Cluster0265 |
| 1441322_at     | Skap1                               | src family associated phosphoprotein 1                                                           | Cluster0265 |
| 1431909_at     | Zc3hav1                             | zinc finger CCCH type, antiviral 1                                                               | Cluster0265 |
| 1420616_at     | Ash2l                               | ash2 (absent, small, or homeotic)-like (Drosophila)                                              | Cluster0266 |
| 1418707_at     | Bag4                                | BCL2-associated athanogene 4                                                                     | Cluster0266 |

|              |                        |                                                              |             |
|--------------|------------------------|--------------------------------------------------------------|-------------|
| 1435998_at   | Ccnb1ip1               | cyclin B1 interacting protein 1                              | Cluster0266 |
| 1448819_at   | Eif2s2                 | eukaryotic translation initiation factor 2, subunit 2 (beta) | Cluster0266 |
| 1448126_at   | Fam60a                 | family with sequence similarity 60, member A                 | Cluster0266 |
| 1452606_at   | Mnd1                   | meiotic nuclear divisions 1 homolog (S. cerevisiae)          | Cluster0266 |
| 1422198_a_at | Shmt1                  | serine hydroxymethyltransferase 1 (soluble)                  | Cluster0266 |
| 1431332_a_at | Terf1                  | telomeric repeat binding factor 1                            | Cluster0266 |
| 1433370_at   | 4930474A20Rik          | RIKEN cDNA 4930474A20 gene                                   | Cluster0267 |
| 1432970_at   | 4933423K11Rik          | RIKEN cDNA 4933423K11 gene                                   | Cluster0267 |
| 1437721_at   | Coro1c                 | coronin, actin binding protein 1C                            | Cluster0267 |
| 1430669_at   | Krtap4-7               | keratin associated protein 4-7                               | Cluster0267 |
| 1447690_at   | Lsr                    | lipolysis stimulated lipoprotein receptor                    | Cluster0267 |
| 1443356_at   | NA                     | ---                                                          | Cluster0267 |
| 1459072_at   | NA                     | ---                                                          | Cluster0267 |
| 1438438_at   | Rilpl1                 | Rab interacting lysosomal protein-like 1                     | Cluster0267 |
| 1419451_at   | Fzr1                   | fizzy/cell division cycle 20 related 1 (Drosophila)          | Cluster0268 |
| 1449821_a_at | LOC100047915 /// Memo1 | similar to Memo1 protein /// mediator of cell motility 1     | Cluster0268 |
| 1423610_at   | Metap2                 | methionine aminopeptidase 2                                  | Cluster0268 |
| 1451048_at   | Metap2                 | methionine aminopeptidase 2                                  | Cluster0268 |
| 1421046_a_at | Pabpc4                 | poly(A) binding protein, cytoplasmic 4                       | Cluster0268 |
| 1451296_x_at | Pabpc4                 | poly(A) binding protein, cytoplasmic 4                       | Cluster0268 |
| 1418078_at   | Psme3                  | proteasome (prosome, macropain) 28 subunit, 3                | Cluster0268 |
| 1454036_a_at | Usp15                  | ubiquitin specific peptidase 15                              | Cluster0268 |
| 1453919_at   | 2610028H24Rik          | RIKEN cDNA 2610028H24 gene                                   | Cluster0269 |
| 1428019_at   | 4932425I24Rik          | RIKEN cDNA 4932425I24 gene                                   | Cluster0269 |
| 1418668_at   | Acsm1                  | acyl-CoA synthetase medium-chain family member 1             | Cluster0269 |
| 1450833_at   | Chrm1                  | cholinergic receptor, muscarinic 1, CNS                      | Cluster0269 |
| 1442189_at   | Cyth1                  | Cytohesin 1                                                  | Cluster0269 |
| 1450564_x_at | Ifna1                  | interferon alpha 1                                           | Cluster0269 |
| 1430970_a_at | Morn3                  | MORN repeat containing 3                                     | Cluster0269 |
| 1430351_at   | Spata18                | spermatogenesis associated 18                                | Cluster0269 |
| 1423285_at   | Coch                   | coagulation factor C homolog (Limulus polyphemus)            | Cluster0270 |
| 1436957_at   | Gabra3                 | gamma-aminobutyric acid (GABA) A receptor, subunit alpha 3   | Cluster0270 |
| 1451961_a_at | Mbp                    | myelin basic protein                                         | Cluster0270 |
| 1455274_at   | NA                     | ---                                                          | Cluster0270 |
| 1460582_x_at | NA                     | ---                                                          | Cluster0270 |
| 1418728_at   | Star                   | steroidogenic acute regulatory protein                       | Cluster0270 |
| 1418729_at   | Star                   | steroidogenic acute regulatory protein                       | Cluster0270 |
| 1449201_at   | Star                   | steroidogenic acute regulatory protein                       | Cluster0270 |
| 1444670_at   | A130004G11Rik          | RIKEN cDNA A130004G11 gene                                   | Cluster0271 |
| 1433192_at   | A430105P17Rik          | RIKEN cDNA A430105P17 gene                                   | Cluster0271 |
| 1459433_at   | C130051F05Rik          | RIKEN cDNA C130051F05 gene                                   | Cluster0271 |
| 1441683_at   | NA                     | ---                                                          | Cluster0271 |
| 1444772_at   | NA                     | ---                                                          | Cluster0271 |
| 1447060_at   | NA                     | ---                                                          | Cluster0271 |
| 1457516_at   | NA                     | ---                                                          | Cluster0271 |
| 1456822_at   | Rad23b                 | RAD23b homolog (S. cerevisiae)                               | Cluster0271 |
| 1434405_at   | Fnip1                  | folliculin interacting protein 1                             | Cluster0272 |
| 1449668_s_at | Fnip1                  | folliculin interacting protein 1                             | Cluster0272 |
| 1433546_at   | Gns                    | glucosamine (N-acetyl)-6-sulfatase                           | Cluster0272 |
| 1438928_x_at | Ninj1                  | ninjurin 1                                                   | Cluster0272 |
| 1415749_a_at | Rragc                  | Ras-related GTP binding C                                    | Cluster0272 |
| 1434768_at   | Tpp1                   | tripeptidyl peptidase I                                      | Cluster0272 |
| 1448313_at   | Tpp1                   | tripeptidyl peptidase I                                      | Cluster0272 |
| 1420495_a_at | Vps26a                 | vacuolar protein sorting 26 homolog A (yeast)                | Cluster0272 |
| 1428838_a_at | Dck                    | deoxycytidine kinase                                         | Cluster0273 |
| 1422046_at   | Itgam                  | integrin alpha M                                             | Cluster0273 |
| 1448995_at   | Pf4                    | platelet factor 4                                            | Cluster0273 |

|              |               |                                                                            |             |
|--------------|---------------|----------------------------------------------------------------------------|-------------|
| 1419097_a_at | Stom          | stomatin                                                                   | Cluster0273 |
| 1419098_a_at | Stom          | stomatin                                                                   | Cluster0273 |
| 1419099_x_at | Stom          | stomatin                                                                   | Cluster0273 |
| 1438910_a_at | Stom          | stomatin                                                                   | Cluster0273 |
| 1449341_a_at | Stom          | stomatin                                                                   | Cluster0273 |
| 1429834_a_at | 1110014N23Rik | RIKEN cDNA 1110014N23 gene                                                 | Cluster0274 |
| 1433612_at   | Ap2s1         | adaptor-related protein complex 2, sigma 1 subunit                         | Cluster0274 |
| 1423133_at   | Cwc15         | CWC15 homolog (S. cerevisiae)                                              | Cluster0274 |
| 1417916_a_at | Fxc1          | fractured callus expressed transcript 1                                    | Cluster0274 |
| 1436416_x_at | Fxc1          | fractured callus expressed transcript 1                                    | Cluster0274 |
| 1448887_x_at | Fxc1          | fractured callus expressed transcript 1                                    | Cluster0274 |
| 1420460_a_at | Pex11b        | peroxisomal biogenesis factor 11 beta                                      | Cluster0274 |
| 1448772_at   | Ube2a         | ubiquitin-conjugating enzyme E2A, RAD6 homolog (S. cerevisiae)             | Cluster0274 |
| 1430047_at   | Ankrd32       | ankyrin repeat domain 32                                                   | Cluster0275 |
| 1440252_at   | H2afj         | H2A histone family, member J                                               | Cluster0275 |
| 1442750_at   | NA            | ---                                                                        | Cluster0275 |
| 1456864_at   | NA            | ---                                                                        | Cluster0275 |
| 1428625_a_at | Rmi1          | RMI1, RecQ mediated genome instability 1, homolog (S. cerevisiae)          | Cluster0275 |
| 1435274_at   | Spopl         | speckle-type POZ protein-like                                              | Cluster0275 |
| 1455778_at   | Zfp192        | zinc finger protein 192                                                    | Cluster0275 |
| 1439558_at   | Zfp317        | zinc finger protein 317                                                    | Cluster0275 |
| 1441768_at   | 9430051O21Rik | RIKEN cDNA 9430051O21 gene                                                 | Cluster0276 |
| 1418286_a_at | Efnb1         | ephrin B1                                                                  | Cluster0276 |
| 1449697_s_at | Mfn1          | mitofusin 1                                                                | Cluster0276 |
| 1443056_at   | NA            | ---                                                                        | Cluster0276 |
| 1445501_at   | NA            | ---                                                                        | Cluster0276 |
| 1459860_x_at | Trim2         | tripartite motif-containing 2                                              | Cluster0276 |
| 1424866_at   | Usp43         | ubiquitin specific peptidase 43                                            | Cluster0276 |
| 1439102_at   | Bptf          | bromodomain PHD finger transcription factor                                | Cluster0277 |
| 1436860_at   | Senp7         | SUMO1/sentrin specific peptidase 7                                         | Cluster0277 |
| 1460363_at   | Tnrc6c        | trinucleotide repeat containing 6C                                         | Cluster0277 |
| 1450066_at   | Ubr1          | ubiquitin protein ligase E3 component n-recogin 1                          | Cluster0277 |
| 1458033_at   | Ubr1          | Ubiquitin protein ligase E3 component n-recogin 1                          | Cluster0277 |
| 1430216_at   | Zfp292        | zinc finger protein 292                                                    | Cluster0277 |
| 1443931_at   | Zfp882        | zinc finger protein 882                                                    | Cluster0277 |
| 1421857_at   | Adam17        | a disintegrin and metallopeptidase domain 17                               | Cluster0278 |
| 1421859_at   | Adam17        | a disintegrin and metallopeptidase domain 17                               | Cluster0278 |
| 1448279_at   | Arcp3         | actin related protein 2/3 complex, subunit 3                               | Cluster0278 |
| 1426334_a_at | Bcl2l11       | BCL2-like 11 (apoptosis facilitator)                                       | Cluster0278 |
| 1435518_at   | Rap1b         | RAS related protein 1b                                                     | Cluster0278 |
| 1449996_a_at | Tpm3          | tropomyosin 3, gamma                                                       | Cluster0278 |
| 1416084_at   | Zfand5        | zinc finger, AN1-type domain 5                                             | Cluster0278 |
| 1449563_at   | Cntn1         | contactin 1                                                                | Cluster0279 |
| 1452981_at   | Cntn1         | contactin 1                                                                | Cluster0279 |
| 1433494_at   | Dos           | downstream of Stk11                                                        | Cluster0279 |
| 1438370_x_at | Dos           | downstream of Stk11                                                        | Cluster0279 |
| 1459807_x_at | P4htm         | prolyl 4-hydroxylase, transmembrane (endoplasmic reticulum)                | Cluster0279 |
| 1440310_at   | Runx1t1       | Runx-related transcription factor 1; translocated to, 1 (cyclin D-related) | Cluster0279 |
| 1434726_at   | Tmem146       | transmembrane protein 146                                                  | Cluster0279 |
| 1442292_at   | Arhgef6       | Rac/Cdc42 guanine nucleotide exchange factor (GEF) 6                       | Cluster0280 |
| 1440751_at   | Ep400         | E1A binding protein p400                                                   | Cluster0280 |
| 1444233_at   | Gpr132        | G protein-coupled receptor 132                                             | Cluster0280 |
| 1441058_at   | Itpkb         | inositol 1,4,5-trisphosphate 3-kinase B                                    | Cluster0280 |
| 1446592_at   | NA            | ---                                                                        | Cluster0280 |
| 1458460_at   | NA            | ---                                                                        | Cluster0280 |
| 1446827_at   | Ncoa2         | nuclear receptor coactivator 2                                             | Cluster0280 |
| 1418305_s_at | Gar1          | GAR1 ribonucleoprotein homolog (yeast)                                     | Cluster0281 |

|              |                      |                                                                                        |             |
|--------------|----------------------|----------------------------------------------------------------------------------------|-------------|
| 1425820_x_at | Gpatch4              | G patch domain containing 4                                                            | Cluster0281 |
| 1417360_at   | Mlh1                 | mutL homolog 1 (E. coli)                                                               | Cluster0281 |
| 1433692_at   | Nat10                | N-acetyltransferase 10                                                                 | Cluster0281 |
| 1451199_at   | Qtrtd1               | queuine tRNA-ribosyltransferase domain containing 1                                    | Cluster0281 |
| 1416864_at   | Surf6                | surfeit gene 6                                                                         | Cluster0281 |
| 1428389_s_at | Wdr43                | WD repeat domain 43                                                                    | Cluster0281 |
| 1448891_at   | Fcrls                | Fc receptor-like 5, scavenger receptor                                                 | Cluster0282 |
| 1425367_at   | Itgal                | integrin alpha L                                                                       | Cluster0282 |
| 1449498_at   | Marco                | macrophage receptor with collagenous structure                                         | Cluster0282 |
| 1458297_s_at | Marco                | macrophage receptor with collagenous structure                                         | Cluster0282 |
| 1458019_at   | NA                   | ---                                                                                    | Cluster0282 |
| 1416560_at   | Slc13a3              | solute carrier family 13 (sodium-dependent dicarboxylate transporter), member 3        | Cluster0282 |
| 1438377_x_at | Slc13a3              | solute carrier family 13 (sodium-dependent dicarboxylate transporter), member 3        | Cluster0282 |
| 1431148_at   | 1700018L02Rik        | RIKEN cDNA 1700018L02 gene                                                             | Cluster0283 |
| 1425751_at   | BC014805             | cDNA sequence BC014805                                                                 | Cluster0283 |
| 1445854_at   | C230004F18Rik        | RIKEN cDNA C230004F18 gene                                                             | Cluster0283 |
| 1440711_at   | C630001G18Rik        | RIKEN cDNA C630001G18 gene                                                             | Cluster0283 |
| 1442961_at   | NA                   | ---                                                                                    | Cluster0283 |
| 1449631_at   | NA                   | ---                                                                                    | Cluster0283 |
| 1444592_at   | Osgep                | O-sialoglycoprotein endopeptidase                                                      | Cluster0283 |
| 1426963_at   | Pacs2                | phosphofurin acidic cluster sorting protein 2                                          | Cluster0284 |
| 1434255_at   | Pacs2                | phosphofurin acidic cluster sorting protein 2                                          | Cluster0284 |
| 1452521_a_at | Plaur                | plasminogen activator, urokinase receptor                                              | Cluster0284 |
| 1421232_at   | Plxna1               | plexin A1                                                                              | Cluster0284 |
| 1428623_at   | Plxna1               | plexin A1                                                                              | Cluster0284 |
| 1423726_at   | Vat1                 | vesicle amine transport protein 1 homolog (T californica)                              | Cluster0284 |
| 1441930_x_at | Vat1                 | Vesicle amine transport protein 1 homolog (T californica)                              | Cluster0284 |
| 1431183_at   | 1700066M21Rik        | RIKEN cDNA 1700066M21 gene                                                             | Cluster0285 |
| 1426076_at   | Cdc27                | cell division cycle 27 homolog (S. cerevisiae)                                         | Cluster0285 |
| 1453683_a_at | Cep55                | centrosomal protein 55                                                                 | Cluster0285 |
| 1453748_a_at | Kif23                | kinesin family member 23                                                               | Cluster0285 |
| 1424173_at   | NA                   | ---                                                                                    | Cluster0285 |
| 1423196_at   | Nedd1                | neural precursor cell expressed, developmentally down-regulated gene 1                 | Cluster0285 |
| 1453761_at   | Phf6                 | PHD finger protein 6                                                                   | Cluster0285 |
| 1431131_s_at | A630007B06Rik        | RIKEN cDNA A630007B06 gene                                                             | Cluster0286 |
| 1460213_at   | Golga4               | golgi autoantigen, golgin subfamily a, 4                                               | Cluster0286 |
| 1435032_at   | Golgb1               | golgi autoantigen, golgin subfamily b, macrogolgin 1                                   | Cluster0286 |
| 1436056_at   | Kif13b               | kinesin family member 13B                                                              | Cluster0286 |
| 1436918_at   | LOC100044376         | similar to Dual-specificity tyrosine-(Y)-phosphorylation regulated kinase 2            | Cluster0286 |
| 1446452_at   | NA                   | ---                                                                                    | Cluster0286 |
| 1420747_at   | Ppnr                 | per-pentamer repeat gene                                                               | Cluster0286 |
| 1448451_at   | Ak2 /// LOC100047005 | adenylate kinase 2 /// similar to adenylate kinase 2                                   | Cluster0287 |
| 1417767_at   | Cyb5b                | cytochrome b5 type B                                                                   | Cluster0287 |
| 1448844_at   | Cyb5b                | cytochrome b5 type B                                                                   | Cluster0287 |
| 1416478_a_at | Mdh2                 | malate dehydrogenase 2, NAD (mitochondrial)                                            | Cluster0287 |
| 1430474_a_at | Mtch2                | mitochondrial carrier homolog 2 (C. elegans)                                           | Cluster0287 |
| 1416955_at   | Slc25a10             | solute carrier family 25 (mitochondrial carrier, dicarboxylate transporter), member 10 | Cluster0287 |
| 1433499_at   | Urgcp                | upregulator of cell proliferation                                                      | Cluster0287 |
| 1430677_at   | 4930442L01Rik        | RIKEN cDNA 4930442L01 gene                                                             | Cluster0288 |
| 1436255_at   | D830044I16Rik        | RIKEN cDNA D830044I16 gene                                                             | Cluster0288 |
| 1444898_at   | NA                   | ---                                                                                    | Cluster0288 |
| 1447087_at   | NA                   | ---                                                                                    | Cluster0288 |
| 1447126_at   | NA                   | ---                                                                                    | Cluster0288 |
| 1455624_at   | NA                   | ---                                                                                    | Cluster0288 |
| 1459308_at   | NA                   | ---                                                                                    | Cluster0288 |
| 1436247_at   | Ints2                | integrator complex subunit 2                                                           | Cluster0289 |
| 1439027_at   | Naa25                | N(alpha)-acetyltransferase 25, NatB auxiliary subunit                                  | Cluster0289 |



|              |                                       |                                                                                                        |             |
|--------------|---------------------------------------|--------------------------------------------------------------------------------------------------------|-------------|
| 1433580_at   | Nup54                                 | nucleoporin 54                                                                                         | Cluster0289 |
| 1438951_x_at | Nup54                                 | nucleoporin 54                                                                                         | Cluster0289 |
| 1459651_s_at | Nup54                                 | nucleoporin 54                                                                                         | Cluster0289 |
| 1428543_at   | Ppat                                  | phosphoribosyl pyrophosphate amidotransferase                                                          | Cluster0289 |
| 1452086_at   | Trmt5                                 | TRM5 tRNA methyltransferase 5 homolog (S. cerevisiae)                                                  | Cluster0289 |
| 1437884_at   | Arl5b                                 | ADP-ribosylation factor-like 5B                                                                        | Cluster0290 |
| 1455166_at   | Arl5b                                 | ADP-ribosylation factor-like 5B                                                                        | Cluster0290 |
| 1418910_at   | Bmp7                                  | bone morphogenetic protein 7                                                                           | Cluster0290 |
| 1435479_at   | Bmp7                                  | bone morphogenetic protein 7                                                                           | Cluster0290 |
| 1416442_at   | Ier2                                  | immediate early response 2                                                                             | Cluster0290 |
| 1421207_at   | Lif                                   | leukemia inhibitory factor                                                                             | Cluster0290 |
| 1445421_at   | NA                                    | ---                                                                                                    | Cluster0290 |
| 1454329_at   | 4933415J04Rik                         | RIKEN cDNA 4933415J04 gene                                                                             | Cluster0291 |
| 1458770_at   | D11Ert4e                              | DNA segment, Chr 11, ERATO Doi 4, expressed                                                            | Cluster0291 |
| 1459503_at   | Gm3764                                | predicted gene 3764                                                                                    | Cluster0291 |
| 1427555_at   | Mll2                                  | myeloid/lymphoid or mixed-lineage leukemia 2                                                           | Cluster0291 |
| 1437778_at   | Rbm15b                                | RNA binding motif protein 15B                                                                          | Cluster0291 |
| 1421248_at   | Syn3                                  | synapsin III                                                                                           | Cluster0291 |
| 1450356_at   | Trhr2                                 | thyrotropin releasing hormone receptor 2                                                               | Cluster0291 |
| 1434623_at   | 2810422J05Rik /// Gm5239 /// Gm7808 / | RIKEN cDNA 2810422J05 gene /// ubiquitin A-52 residue ribosomal protein fusion product 1 pseudogene // | Cluster0292 |
| 1433234_at   | 4930424E08Rik                         | RIKEN cDNA 4930424E08 gene                                                                             | Cluster0292 |
| 1453835_at   | 4930505M18Rik                         | RIKEN cDNA 4930505M18 gene                                                                             | Cluster0292 |
| 1444940_at   | C76411                                | expressed sequence C76411                                                                              | Cluster0292 |
| 1457962_at   | NA                                    | ---                                                                                                    | Cluster0292 |
| 1422372_at   | Olfir15                               | olfactory receptor 15                                                                                  | Cluster0292 |
| 1421697_at   | Ush2a                                 | Usher syndrome 2A (autosomal recessive, mild) homolog (human)                                          | Cluster0292 |
| 1456580_s_at | Atp5d                                 | ATP synthase, H+ transporting, mitochondrial F1 complex, delta subunit                                 | Cluster0293 |
| 1435613_x_at | Cox5b                                 | cytochrome c oxidase, subunit Vb                                                                       | Cluster0293 |
| 1454716_x_at | Cox5b                                 | cytochrome c oxidase, subunit Vb                                                                       | Cluster0293 |
| 1456588_x_at | Cox5b                                 | cytochrome c oxidase, subunit Vb                                                                       | Cluster0293 |
| 1436757_a_at | Cox6b1                                | cytochrome c oxidase, subunit VIb polypeptide 1                                                        | Cluster0293 |
| 1416604_at   | Cyc1                                  | cytochrome c-1                                                                                         | Cluster0293 |
| 1455997_a_at | Gm2962 /// Uqcrb                      | predicted pseudogene 2962 /// ubiquinol-cytochrome c reductase binding protein                         | Cluster0293 |
| 1441397_at   | NA                                    | ---                                                                                                    | Cluster0294 |
| 1442782_at   | NA                                    | ---                                                                                                    | Cluster0294 |
| 1457402_at   | NA                                    | ---                                                                                                    | Cluster0294 |
| 1458324_x_at | NA                                    | ---                                                                                                    | Cluster0294 |
| 1434802_s_at | Ntf3                                  | neurotrophin 3                                                                                         | Cluster0294 |
| 1436044_at   | Scn7a                                 | sodium channel, voltage-gated, type VII, alpha                                                         | Cluster0294 |
| 1428026_at   | Tshz2                                 | teashirt zinc finger family member 2                                                                   | Cluster0294 |
| 1419888_at   | NA                                    | ---                                                                                                    | Cluster0295 |
| 1439930_at   | NA                                    | ---                                                                                                    | Cluster0295 |
| 1444194_at   | NA                                    | ---                                                                                                    | Cluster0295 |
| 1444570_at   | NA                                    | ---                                                                                                    | Cluster0295 |
| 1447581_at   | NA                                    | ---                                                                                                    | Cluster0295 |
| 1456347_at   | NA                                    | ---                                                                                                    | Cluster0295 |
| 1459746_at   | NA                                    | ---                                                                                                    | Cluster0295 |
| 1416093_a_at | Mrpl20                                | mitochondrial ribosomal protein L20                                                                    | Cluster0296 |
| 1460195_at   | Mrps11                                | mitochondrial ribosomal protein S11                                                                    | Cluster0296 |
| 1418737_at   | Nudt2                                 | nudix (nucleoside diphosphate linked moiety X)-type motif 2                                            | Cluster0296 |
| 1451185_at   | Sf3b5                                 | splicing factor 3b, subunit 5                                                                          | Cluster0296 |
| 1455211_a_at | Timm13                                | translocase of inner mitochondrial membrane 13 homolog (yeast)                                         | Cluster0296 |
| 1416376_at   | Tmem97                                | transmembrane protein 97                                                                               | Cluster0296 |
| 1428747_at   | Trnau1ap                              | tRNA selenocysteine 1 associated protein 1                                                             | Cluster0296 |
| 1424270_at   | Dclk1                                 | doublecortin-like kinase 1                                                                             | Cluster0297 |
| 1424271_at   | Dclk1                                 | doublecortin-like kinase 1                                                                             | Cluster0297 |
| 1436659_at   | Dclk1                                 | doublecortin-like kinase 1                                                                             | Cluster0297 |

|              |                                                |                                                                                                                                                            |             |
|--------------|------------------------------------------------|------------------------------------------------------------------------------------------------------------------------------------------------------------|-------------|
| 1451289_at   | Dclk1                                          | doublecortin-like kinase 1                                                                                                                                 | Cluster0297 |
| 1423628_s_at | Pcdhga1 /// Pcdhga10 /// Pcdhga11 /// Pcdhga12 | protocadherin gamma subfamily A, 1 /// protocadherin gamma subfamily A, 10 /// protocadherin gamma subfamily A, 11 /// protocadherin gamma subfamily A, 12 | Cluster0297 |
| 1416211_a_at | Ptn                                            | pleiotrophin                                                                                                                                               | Cluster0297 |
| 1448254_at   | Ptn                                            | pleiotrophin                                                                                                                                               | Cluster0297 |
| 1455821_x_at | C1qbp                                          | complement component 1, q subcomponent binding protein                                                                                                     | Cluster0298 |
| 1438168_x_at | Ddx39                                          | DEAD (Asp-Glu-Ala-Asp) box polypeptide 39                                                                                                                  | Cluster0298 |
| 1438287_x_at | Ddx39                                          | DEAD (Asp-Glu-Ala-Asp) box polypeptide 39                                                                                                                  | Cluster0298 |
| 1451065_a_at | Ddx39                                          | DEAD (Asp-Glu-Ala-Asp) box polypeptide 39                                                                                                                  | Cluster0298 |
| 1455814_x_at | Ddx39                                          | DEAD (Asp-Glu-Ala-Asp) box polypeptide 39                                                                                                                  | Cluster0298 |
| 1435369_at   | Fastkd5                                        | FAST kinase domains 5                                                                                                                                      | Cluster0298 |
| 1434011_a_at | Ints5                                          | integrator complex subunit 5                                                                                                                               | Cluster0298 |
| 1448912_at   | C1qtnf1                                        | C1q and tumor necrosis factor related protein 1                                                                                                            | Cluster0299 |
| 1418455_at   | Copz2                                          | coatamer protein complex, subunit zeta 2                                                                                                                   | Cluster0299 |
| 1415919_at   | Npdc1                                          | neural proliferation, differentiation and control gene 1                                                                                                   | Cluster0299 |
| 1419665_a_at | Nupr1                                          | nuclear protein 1                                                                                                                                          | Cluster0299 |
| 1419666_x_at | Nupr1                                          | nuclear protein 1                                                                                                                                          | Cluster0299 |
| 1427436_at   | Six2                                           | sine oculis-related homeobox 2 homolog (Drosophila)                                                                                                        | Cluster0299 |
| 1416108_a_at | Tmed3                                          | transmembrane emp24 domain containing 3                                                                                                                    | Cluster0299 |
| 1438641_x_at | Fam57b                                         | family with sequence similarity 57, member B                                                                                                               | Cluster0300 |
| 1452806_at   | Fam57b                                         | family with sequence similarity 57, member B                                                                                                               | Cluster0300 |
| 1452807_s_at | Fam57b                                         | family with sequence similarity 57, member B                                                                                                               | Cluster0300 |
| 1449544_a_at | Kcnh2 /// LOC100047076                         | potassium voltage-gated channel, subfamily H (eag-related), member 2 /// similar to potassium channel epsilon 2                                            | Cluster0300 |
| 1418478_at   | Lmo1                                           | LIM domain only 1                                                                                                                                          | Cluster0300 |
| 1439192_at   | Nova2                                          | neuro-oncological ventral antigen 2                                                                                                                        | Cluster0300 |
| 1455925_at   | Prdm8                                          | PR domain containing 8                                                                                                                                     | Cluster0300 |
| 1454067_a_at | 4931406C07Rik                                  | RIKEN cDNA 4931406C07 gene                                                                                                                                 | Cluster0301 |
| 1439853_at   | B4galnt2                                       | beta-1,4-N-acetyl-galactosaminyl transferase 2                                                                                                             | Cluster0301 |
| 1426570_a_at | Frk                                            | fyn-related kinase                                                                                                                                         | Cluster0301 |
| 1449144_at   | Gna11                                          | guanine nucleotide binding protein, alpha 11                                                                                                               | Cluster0301 |
| 1423331_a_at | LOC100047693 /// Pvr13                         | similar to cell adhesion molecule nectin-3 beta /// poliovirus receptor-related 3                                                                          | Cluster0301 |
| 1416229_at   | Rfk                                            | riboflavin kinase                                                                                                                                          | Cluster0301 |
| 1426809_at   | Tprm                                           | taperin                                                                                                                                                    | Cluster0301 |
| 1453980_at   | 5330434G04Rik                                  | RIKEN cDNA 5330434G04 gene                                                                                                                                 | Cluster0302 |
| 1457318_at   | A330008L17Rik                                  | RIKEN cDNA A330008L17 gene                                                                                                                                 | Cluster0302 |
| 1435453_at   | A930011O12Rik                                  | RIKEN cDNA A930011O12 gene                                                                                                                                 | Cluster0302 |
| 1444129_at   | NA                                             | ---                                                                                                                                                        | Cluster0302 |
| 1434635_at   | Rph3a                                          | rabphilin 3A                                                                                                                                               | Cluster0302 |
| 1419673_at   | Spock1                                         | sparc/osteonectin, cwcv and kazal-like domains proteoglycan 1                                                                                              | Cluster0302 |
| 1423221_at   | Tubb4                                          | tubulin, beta 4                                                                                                                                            | Cluster0302 |
| 1440326_at   | 5830435N17Rik                                  | RIKEN cDNA 5830435N17 gene                                                                                                                                 | Cluster0303 |
| 1419226_at   | Cd96                                           | CD96 antigen                                                                                                                                               | Cluster0303 |
| 1441418_at   | NA                                             | ---                                                                                                                                                        | Cluster0303 |
| 1441589_at   | NA                                             | ---                                                                                                                                                        | Cluster0303 |
| 1445405_at   | NA                                             | ---                                                                                                                                                        | Cluster0303 |
| 1426044_a_at | Prkcc                                          | protein kinase C, theta                                                                                                                                    | Cluster0303 |
| 1440178_x_at | Zap70                                          | zeta-chain (TCR) associated protein kinase                                                                                                                 | Cluster0303 |
| 1424404_at   | 0610040J01Rik                                  | RIKEN cDNA 0610040J01 gene                                                                                                                                 | Cluster0304 |
| 1433558_at   | Dab2ip                                         | disabled homolog 2 (Drosophila) interacting protein                                                                                                        | Cluster0304 |
| 1453122_at   | Fam135a                                        | family with sequence similarity 135, member A                                                                                                              | Cluster0304 |
| 1422833_at   | Foxa2                                          | forkhead box A2                                                                                                                                            | Cluster0304 |
| 1434140_at   | Mcf2l                                          | mcf.2 transforming sequence-like                                                                                                                           | Cluster0304 |
| 1435161_at   | Sepsecs                                        | Sep (O-phosphoserine) tRNA:Sec (selenocysteine) tRNA synthase                                                                                              | Cluster0304 |
| 1425109_at   | Sic44a3                                        | solute carrier family 44, member 3                                                                                                                         | Cluster0304 |
| 1424122_s_at | Comm1d1                                        | COMM domain containing 1                                                                                                                                   | Cluster0305 |
| 1434057_at   | Ndufb6                                         | NADH dehydrogenase (ubiquinone) 1 beta subcomplex, 6                                                                                                       | Cluster0305 |
| 1416366_at   | Ndufc2                                         | NADH dehydrogenase (ubiquinone) 1, subcomplex unknown, 2                                                                                                   | Cluster0305 |
| 1416494_at   | Ndufs5                                         | NADH dehydrogenase (ubiquinone) Fe-S protein 5                                                                                                             | Cluster0305 |

|              |                               |                                                                                                           |             |
|--------------|-------------------------------|-----------------------------------------------------------------------------------------------------------|-------------|
| 1416495_s_at | Ndufs5                        | NADH dehydrogenase (ubiquinone) Fe-S protein 5                                                            | Cluster0305 |
| 1417105_at   | Trappc2l                      | trafficking protein particle complex 2-like                                                               | Cluster0305 |
| 1428621_a_at | Vps25                         | vacuolar protein sorting 25 (yeast)                                                                       | Cluster0305 |
| 1440213_a_at | 2010001M06Rik                 | RIKEN cDNA 2010001M06 gene                                                                                | Cluster0306 |
| 1451438_s_at | Clec2h                        | C-type lectin domain family 2, member h                                                                   | Cluster0306 |
| 1423519_at   | Fam108c                       | family with sequence similarity 108, member C                                                             | Cluster0306 |
| 1440191_s_at | Leng9                         | leukocyte receptor cluster (LRC) member 9                                                                 | Cluster0306 |
| 1425359_at   | Mall                          | mal, T-cell differentiation protein-like                                                                  | Cluster0306 |
| 1418832_at   | Pkp3                          | plakophilin 3                                                                                             | Cluster0306 |
| 1417990_at   | Ppp1r14d                      | protein phosphatase 1, regulatory (inhibitor) subunit 14D                                                 | Cluster0306 |
| 1428270_at   | Glt8d1                        | glycosyltransferase 8 domain containing 1                                                                 | Cluster0307 |
| 1427915_s_at | LOC100045866 /// Tceb1        | similar to elongation factor SIII p15 subunit /// transcription elongation factor B (SIII), polypeptide 1 | Cluster0307 |
| 1417879_at   | Nenf                          | neuron derived neurotrophic factor                                                                        | Cluster0307 |
| 1416573_at   | Pofut2                        | protein O-fucosyltransferase 2                                                                            | Cluster0307 |
| 1435056_x_at | Pofut2                        | protein O-fucosyltransferase 2                                                                            | Cluster0307 |
| 1437845_x_at | Pofut2                        | protein O-fucosyltransferase 2                                                                            | Cluster0307 |
| 1448384_at   | Pofut2                        | protein O-fucosyltransferase 2                                                                            | Cluster0307 |
| 1419596_at   | Eda                           | ectodysplasin-A                                                                                           | Cluster0308 |
| 1437040_at   | Etnk2                         | ethanolamine kinase 2                                                                                     | Cluster0308 |
| 1454784_at   | Hs3st2                        | heparan sulfate (glucosamine) 3-O-sulfotransferase 2                                                      | Cluster0308 |
| 1422832_at   | Rgr                           | retinal G protein coupled receptor                                                                        | Cluster0308 |
| 1430497_at   | Rxra                          | retinoid X receptor alpha                                                                                 | Cluster0308 |
| 1451581_at   | Saps2                         | SAPS domain family, member 2                                                                              | Cluster0308 |
| 1436005_at   | Sfrs14                        | splicing factor, arginine/serine-rich 14                                                                  | Cluster0308 |
| 1432514_at   | 1700066J24Rik                 | RIKEN cDNA 1700066J24 gene                                                                                | Cluster0309 |
| 1453431_at   | 2610206C17Rik                 | RIKEN cDNA 2610206C17 gene                                                                                | Cluster0309 |
| 1433167_at   | 4930444E06Rik                 | RIKEN cDNA 4930444E06 gene                                                                                | Cluster0309 |
| 1436106_x_at | Ccdc74a                       | coiled-coil domain containing 74A                                                                         | Cluster0309 |
| 1441659_at   | Dpf3                          | D4, zinc and double PHD fingers, family 3                                                                 | Cluster0309 |
| 1453057_at   | Fam187b                       | family with sequence similarity 187, member B                                                             | Cluster0309 |
| 1456275_at   | Mrpl21                        | mitochondrial ribosomal protein L21                                                                       | Cluster0309 |
| 1429378_x_at | AY761184                      | cDNA sequence AY761184                                                                                    | Cluster0310 |
| 1450631_x_at | Defa24                        | defensin, alpha, 24                                                                                       | Cluster0310 |
| 1450709_at   | Defa5 /// Gm10104 /// Gm15315 | defensin, alpha, 5 /// predicted gene 10104 /// predicted gene 15315                                      | Cluster0310 |
| 1418550_x_at | Defa-rs1                      | defensin, alpha, related sequence 1                                                                       | Cluster0310 |
| 1418165_at   | Itln1                         | intelectin 1 (galactofuranose binding)                                                                    | Cluster0310 |
| 1437060_at   | Olfm4                         | olfactomedin 4                                                                                            | Cluster0310 |
| 1448186_at   | Pnliprp2                      | pancreatic lipase-related protein 2                                                                       | Cluster0310 |
| 1454739_at   | Cdc27                         | cell division cycle 27 homolog (S. cerevisiae)                                                            | Cluster0311 |
| 1445684_s_at | Hdac2                         | histone deacetylase 2                                                                                     | Cluster0311 |
| 1449080_at   | Hdac2                         | histone deacetylase 2                                                                                     | Cluster0311 |
| 1449633_s_at | Nt5c3l                        | 5 -nucleotidase, cytosolic III-like                                                                       | Cluster0311 |
| 1416152_a_at | Sfrs3                         | splicing factor, arginine/serine-rich 3 (SRp20)                                                           | Cluster0311 |
| 1416045_a_at | Smarcb1                       | SWI/SNF related, matrix associated, actin dependent regulator of chromatin, subfamily b, member 1         | Cluster0311 |
| 1422778_at   | Taf9                          | TAF9 RNA polymerase II, TATA box binding protein (TBP)-associated factor                                  | Cluster0311 |
| 1446368_at   | 9130221J18Rik                 | RIKEN cDNA 9130221J18 gene                                                                                | Cluster0312 |
| 1435943_at   | Dpep1                         | dipeptidase 1 (renal)                                                                                     | Cluster0312 |
| 1427434_at   | Naip6                         | NLR family, apoptosis inhibitory protein 6                                                                | Cluster0312 |
| 1419105_at   | Nr1h4                         | nuclear receptor subfamily 1, group H, member 4                                                           | Cluster0312 |
| 1450245_at   | Slc10a2                       | solute carrier family 10, member 2                                                                        | Cluster0312 |
| 1436644_x_at | Tmem25                        | transmembrane protein 25                                                                                  | Cluster0312 |
| 1419498_at   | Tmig1                         | transmembrane and immunoglobulin domain containing 1                                                      | Cluster0312 |
| 1450528_at   | B3galt5                       | UDP-Gal:betaGlcNAc beta 1,3-galactosyltransferase, polypeptide 5                                          | Cluster0313 |
| 1456680_at   | B3gnt6                        | UDP-GlcNAc:betaGal beta-1,3-N-acetylglucosaminyltransferase 6 (core 3 synthase)                           | Cluster0313 |
| 1427711_a_at | Ceacam1                       | carcinoembryonic antigen-related cell adhesion molecule 1                                                 | Cluster0313 |
| 1427712_at   | Ceacam1                       | carcinoembryonic antigen-related cell adhesion molecule 1                                                 | Cluster0313 |
| 1452532_x_at | Ceacam1                       | carcinoembryonic antigen-related cell adhesion molecule 1                                                 | Cluster0313 |

|              |                           |                                                                                                              |             |
|--------------|---------------------------|--------------------------------------------------------------------------------------------------------------|-------------|
| 1427398_at   | Muc4                      | mucin 4                                                                                                      | Cluster0313 |
| 1420940_x_at | Rgs5                      | regulator of G-protein signaling 5                                                                           | Cluster0313 |
| 1428649_at   | Cand1                     | cullin associated and neddylation disassociated 1                                                            | Cluster0314 |
| 1449096_at   | Ccdc127                   | coiled-coil domain containing 127                                                                            | Cluster0314 |
| 1450422_a_at | Kdelc1                    | KDEL (Lys-Asp-Glu-Leu) containing 1                                                                          | Cluster0314 |
| 1416167_at   | Prdx4                     | peroxiredoxin 4                                                                                              | Cluster0314 |
| 1424562_a_at | Slc25a4                   | solute carrier family 25 (mitochondrial carrier, adenine nucleotide translocator), member 4                  | Cluster0314 |
| 1434897_a_at | Slc25a4                   | solute carrier family 25 (mitochondrial carrier, adenine nucleotide translocator), member 4                  | Cluster0314 |
| 1455069_x_at | Slc25a4                   | solute carrier family 25 (mitochondrial carrier, adenine nucleotide translocator), member 4                  | Cluster0314 |
| 1424729_at   | Adig                      | adipogenin                                                                                                   | Cluster0315 |
| 1422651_at   | Adipoq                    | adiponectin, C1Q and collagen domain containing                                                              | Cluster0315 |
| 1436453_at   | BB144871                  | expressed sequence BB144871                                                                                  | Cluster0315 |
| 1451371_at   | Mrap                      | melanocortin 2 receptor accessory protein                                                                    | Cluster0315 |
| 1415964_at   | Scd1                      | stearoyl-Coenzyme A desaturase 1                                                                             | Cluster0315 |
| 1415965_at   | Scd1                      | stearoyl-Coenzyme A desaturase 1                                                                             | Cluster0315 |
| 1436521_at   | Slc36a2                   | solute carrier family 36 (proton/amino acid symporter), member 2                                             | Cluster0315 |
| 1457642_at   | 2810030E01Rik             | RIKEN cDNA 2810030E01 gene                                                                                   | Cluster0316 |
| 1443977_at   | E130014H10Rik             | RIKEN cDNA E130014H10 gene                                                                                   | Cluster0316 |
| 1448507_at   | Efh1                      | EF hand domain containing 1                                                                                  | Cluster0316 |
| 1418157_at   | LOC100046044 /// Nr2f1    | similar to COUP-TFI /// nuclear receptor subfamily 2, group F, member 1                                      | Cluster0316 |
| 1456903_at   | Ptx3                      | pentraxin related gene                                                                                       | Cluster0316 |
| 1439072_at   | Slc1a3                    | solute carrier family 1 (glial high affinity glutamate transporter), member 3                                | Cluster0316 |
| 1440491_at   | Slc1a3                    | solute carrier family 1 (glial high affinity glutamate transporter), member 3                                | Cluster0316 |
| 1420116_s_at | Golph3                    | golgi phosphoprotein 3                                                                                       | Cluster0317 |
| 1434446_at   | Insr                      | insulin receptor                                                                                             | Cluster0317 |
| 1453174_at   | Nbeal1                    | neurobeachin like 1                                                                                          | Cluster0317 |
| 1443830_x_at | Rnf103                    | ring finger protein 103                                                                                      | Cluster0317 |
| 1423108_at   | Slc25a20                  | solute carrier family 25 (mitochondrial carnitine/acylcarnitine translocase), member 20                      | Cluster0317 |
| 1423109_s_at | Slc25a20                  | solute carrier family 25 (mitochondrial carnitine/acylcarnitine translocase), member 20                      | Cluster0317 |
| 1435251_at   | Snx13                     | sorting nexin 13                                                                                             | Cluster0317 |
| 1420369_a_at | Csn2                      | casein beta                                                                                                  | Cluster0318 |
| 1441333_at   | NA                        | ---                                                                                                          | Cluster0318 |
| 1444985_at   | NA                        | ---                                                                                                          | Cluster0318 |
| 1444317_at   | Pcdh15                    | protocadherin 15                                                                                             | Cluster0318 |
| 1422324_a_at | Pthlh                     | parathyroid hormone-like peptide                                                                             | Cluster0318 |
| 1420553_x_at | Serpina1a                 | serine (or cysteine) peptidase inhibitor, clade A, member 1A                                                 | Cluster0318 |
| 1422756_at   | Slc32a1                   | solute carrier family 32 (GABA vesicular transporter), member 1                                              | Cluster0318 |
| 1436119_at   | Aldh1l2                   | aldehyde dehydrogenase 1 family, member L2                                                                   | Cluster0319 |
| 1428446_at   | Dync2li1 /// LOC100048514 | dynein cytoplasmic 2 light intermediate chain 1 /// similar to Dynein cytoplasmic 2 light intermediate chain | Cluster0319 |
| 1450135_at   | Fzd3                      | frizzled homolog 3 (Drosophila)                                                                              | Cluster0319 |
| 1419286_s_at | lft81                     | intraflagellar transport 81 homolog (Chlamydomonas)                                                          | Cluster0319 |
| 1449407_at   | lft81                     | intraflagellar transport 81 homolog (Chlamydomonas)                                                          | Cluster0319 |
| 1429058_at   | Tmem107                   | transmembrane protein 107                                                                                    | Cluster0319 |
| 1429059_s_at | Tmem107                   | transmembrane protein 107                                                                                    | Cluster0319 |
| 1433110_at   | 5830474E16Rik             | RIKEN cDNA 5830474E16 gene                                                                                   | Cluster0320 |
| 1440575_at   | Hspa4                     | heat shock protein 4                                                                                         | Cluster0320 |
| 1441071_at   | Kcnq5                     | potassium voltage-gated channel, subfamily Q, member 5                                                       | Cluster0320 |
| 1445837_at   | NA                        | ---                                                                                                          | Cluster0320 |
| 1446212_at   | NA                        | ---                                                                                                          | Cluster0320 |
| 1446537_at   | NA                        | ---                                                                                                          | Cluster0320 |
| 1457898_at   | NA                        | ---                                                                                                          | Cluster0320 |
| 1420850_at   | Crnk1                     | Crn, crooked neck-like 1 (Drosophila)                                                                        | Cluster0321 |
| 1422681_at   | Ctr9                      | Ctr9, Paf1/RNA polymerase II complex component, homolog (S. cerevisiae)                                      | Cluster0321 |
| 1424570_at   | Ddx46                     | DEAD (Asp-Glu-Ala-Asp) box polypeptide 46                                                                    | Cluster0321 |
| 1450665_at   | Gabpa                     | GA repeat binding protein, alpha                                                                             | Cluster0321 |
| 1453263_at   | Naa35                     | N(alpha)-acetyltransferase 35, NatC auxiliary subunit                                                        | Cluster0321 |
| 1430875_a_at | Pak1ip1                   | PAK1 interacting protein 1                                                                                   | Cluster0321 |

|              |               |                                                                                    |             |
|--------------|---------------|------------------------------------------------------------------------------------|-------------|
| 1432042_a_at | Smu1          | smu-1 suppressor of mec-8 and unc-52 homolog (C. elegans)                          | Cluster0321 |
| 1427214_at   | Agmat         | agmatine ureohydrolase (agmatinase)                                                | Cluster0322 |
| 1422422_at   | Defa4         | defensin, alpha, 4                                                                 | Cluster0322 |
| 1422242_at   | Defa-rs10     | defensin, alpha, related sequence 10                                               | Cluster0322 |
| 1420598_x_at | Defa-rs2      | defensin, alpha, related sequence 2                                                | Cluster0322 |
| 1422934_x_at | Defa-rs7      | defensin, alpha, related sequence 7                                                | Cluster0322 |
| 1420250_at   | NA            | ---                                                                                | Cluster0322 |
| 1448852_at   | Rgn           | regucalcin                                                                         | Cluster0322 |
| 1440759_at   | Gm10672       | predicted gene 10672                                                               | Cluster0323 |
| 1419601_at   | Kcnj10        | potassium inwardly-rectifying channel, subfamily J, member 10                      | Cluster0323 |
| 1447277_s_at | Pcyox1        | prenylcysteine oxidase 1                                                           | Cluster0323 |
| 1454704_at   | Scarb2        | scavenger receptor class B, member 2                                               | Cluster0323 |
| 1453055_at   | Sema6d        | sema domain, transmembrane domain (TM), and cytoplasmic domain, (semaphorin) 6D    | Cluster0323 |
| 1451342_at   | Spon1         | spondin 1, (f-spondin) extracellular matrix protein                                | Cluster0323 |
| 1439502_at   | Tecpr2        | tectonin beta-propeller repeat containing 2                                        | Cluster0323 |
| 1426300_at   | Alcam         | activated leukocyte cell adhesion molecule                                         | Cluster0324 |
| 1426301_at   | Alcam         | activated leukocyte cell adhesion molecule                                         | Cluster0324 |
| 1437466_at   | Alcam         | activated leukocyte cell adhesion molecule                                         | Cluster0324 |
| 1437467_at   | Alcam         | activated leukocyte cell adhesion molecule                                         | Cluster0324 |
| 1420383_a_at | Col4a3bp      | collagen, type IV, alpha 3 (Goodpasture antigen) binding protein                   | Cluster0324 |
| 1449847_a_at | Col4a3bp      | collagen, type IV, alpha 3 (Goodpasture antigen) binding protein                   | Cluster0324 |
| 1416304_at   | Litaf         | LPS-induced TN factor                                                              | Cluster0324 |
| 1428785_at   | Amotl1        | angiomin-like 1                                                                    | Cluster0325 |
| 1426719_at   | Apbb2         | amyloid beta (A4) precursor protein-binding, family B, member 2                    | Cluster0325 |
| 1452342_at   | Apbb2         | amyloid beta (A4) precursor protein-binding, family B, member 2                    | Cluster0325 |
| 1417817_a_at | Wwtr1         | WW domain containing transcription regulator 1                                     | Cluster0325 |
| 1417818_at   | Wwtr1         | WW domain containing transcription regulator 1                                     | Cluster0325 |
| 1437155_a_at | Wwtr1         | WW domain containing transcription regulator 1                                     | Cluster0325 |
| 1449314_at   | Zfpm2         | zinc finger protein, multitype 2                                                   | Cluster0325 |
| 1449606_at   | Lat2          | Linker for activation of T cells family, member 2                                  | Cluster0326 |
| 1434036_at   | Mtss1         | metastasis suppressor 1                                                            | Cluster0326 |
| 1437069_at   | Osbpl8        | oxysterol binding protein-like 8                                                   | Cluster0326 |
| 1425869_a_at | Psen2         | presenilin 2                                                                       | Cluster0326 |
| 1427448_at   | Rabep1        | rabaptin, RAB GTPase binding effector protein 1                                    | Cluster0326 |
| 1443856_at   | Rabep1        | rabaptin, RAB GTPase binding effector protein 1                                    | Cluster0326 |
| 1422894_at   | Sfmbt1        | Scm-like with four mbt domains 1                                                   | Cluster0326 |
| 1431299_a_at | 2310014H01Rik | RIKEN cDNA 2310014H01 gene                                                         | Cluster0327 |
| 1426454_at   | Arhgdib       | Rho, GDP dissociation inhibitor (GDI) beta                                         | Cluster0327 |
| 1433963_a_at | Fermt3        | fermitin family homolog 3 (Drosophila)                                             | Cluster0327 |
| 1433964_s_at | Fermt3        | fermitin family homolog 3 (Drosophila)                                             | Cluster0327 |
| 1456014_s_at | Fermt3        | fermitin family homolog 3 (Drosophila)                                             | Cluster0327 |
| 1418396_at   | Gpsm3         | G-protein signalling modulator 3 (AGS3-like, C. elegans)                           | Cluster0327 |
| 1417620_at   | Rac2          | RAS-related C3 botulinum substrate 2                                               | Cluster0327 |
| 1425934_a_at | B4galt4       | UDP-Gal:betaGlcNAc beta 1,4-galactosyltransferase, polypeptide 4                   | Cluster0328 |
| 1418287_a_at | Dmbt1         | deleted in malignant brain tumors 1                                                | Cluster0328 |
| 1423637_at   | Galnt4        | UDP-N-acetyl-alpha-D-galactosamine:polypeptide N-acetylgalactosaminyltransferase 4 | Cluster0328 |
| 1460331_at   | Tm9sf2        | transmembrane 9 superfamily member 2                                               | Cluster0328 |
| 1417028_a_at | Trim2         | tripartite motif-containing 2                                                      | Cluster0328 |
| 1417029_a_at | Trim2         | tripartite motif-containing 2                                                      | Cluster0328 |
| 1448551_a_at | Trim2         | tripartite motif-containing 2                                                      | Cluster0328 |
| 1453598_at   | 3110082D06Rik | RIKEN cDNA 3110082D06 gene                                                         | Cluster0329 |
| 1455038_at   | 5730471H19Rik | RIKEN cDNA 5730471H19 gene                                                         | Cluster0329 |
| 1418476_at   | Cr1f1         | cytokine receptor-like factor 1                                                    | Cluster0329 |
| 1422738_at   | Ddr2          | discoidin domain receptor family, member 2                                         | Cluster0329 |
| 1426388_s_at | Ryk           | receptor-like tyrosine kinase                                                      | Cluster0329 |
| 1451789_a_at | Ryk           | receptor-like tyrosine kinase                                                      | Cluster0329 |
| 1431798_a_at | Syde1         | synapse defective 1, Rho GTPase, homolog 1 (C. elegans)                            | Cluster0329 |

|              |                       |                                                                                                  |             |
|--------------|-----------------------|--------------------------------------------------------------------------------------------------|-------------|
| 1432924_at   | 2810404I24Rik         | RIKEN cDNA 2810404I24 gene                                                                       | Cluster0330 |
| 1453384_at   | Dennd1b               | DENN/MADD domain containing 1B                                                                   | Cluster0330 |
| 1446407_at   | Mysm1                 | Myb-like, SWIRM and MPN domains 1                                                                | Cluster0330 |
| 1442381_at   | NA                    | ---                                                                                              | Cluster0330 |
| 1444114_at   | NA                    | ---                                                                                              | Cluster0330 |
| 1445282_at   | NA                    | ---                                                                                              | Cluster0330 |
| 1439161_at   | Saps3                 | SAPS domain family, member 3                                                                     | Cluster0330 |
| 1419958_at   | Cphx                  | cytoplasmic polyadenylated homeobox                                                              | Cluster0331 |
| 1450319_at   | Gabrb2                | gamma-aminobutyric acid (GABA) A receptor, subunit beta 2                                        | Cluster0331 |
| 1449242_s_at | Hrg                   | histidine-rich glycoprotein                                                                      | Cluster0331 |
| 1427800_at   | Krtap16-9             | Keratin associated protein 16-9                                                                  | Cluster0331 |
| 1445988_at   | NA                    | ---                                                                                              | Cluster0331 |
| 1459410_at   | NA                    | ---                                                                                              | Cluster0331 |
| 1436288_at   | Wfdc15a               | WAP four-disulfide core domain 15A                                                               | Cluster0331 |
| 1421058_at   | Adh7                  | alcohol dehydrogenase 7 (class IV), mu or sigma polypeptide                                      | Cluster0332 |
| 1450110_at   | Adh7                  | alcohol dehydrogenase 7 (class IV), mu or sigma polypeptide                                      | Cluster0332 |
| 1416855_at   | Gas1                  | growth arrest specific 1                                                                         | Cluster0332 |
| 1448494_at   | Gas1                  | growth arrest specific 1                                                                         | Cluster0332 |
| 1450112_a_at | Gas2                  | growth arrest specific 2                                                                         | Cluster0332 |
| 1426298_at   | Irx2 /// LOC100045612 | Iroquois related homeobox 2 (Drosophila) /// similar to iroquois-class homeobox protein IRX2     | Cluster0332 |
| 1424440_at   | Mrps6                 | mitochondrial ribosomal protein S6                                                               | Cluster0332 |
| 1444262_at   | 1110017F19Rik         | RIKEN cDNA 1110017F19 gene                                                                       | Cluster0333 |
| 1455802_x_at | Agr2                  | anterior gradient 2 (Xenopus laevis)                                                             | Cluster0333 |
| 1449822_at   | Atoh1                 | atonal homolog 1 (Drosophila)                                                                    | Cluster0333 |
| 1450139_at   | Ern2                  | endoplasmic reticulum (ER) to nucleus signalling 2                                               | Cluster0333 |
| 1437760_at   | Galnt12               | UDP-N-acetyl-alpha-D-galactosamine:polypeptide N-acetylgalactosaminyltransferase 12              | Cluster0333 |
| 1424618_at   | Hpd                   | 4-hydroxyphenylpyruvic acid dioxygenase                                                          | Cluster0333 |
| 1443408_at   | NA                    | ---                                                                                              | Cluster0333 |
| 1427559_a_at | Atf2                  | activating transcription factor 2                                                                | Cluster0334 |
| 1430519_a_at | Cnot7                 | CCR4-NOT transcription complex, subunit 7                                                        | Cluster0334 |
| 1460665_a_at | Cnot7                 | CCR4-NOT transcription complex, subunit 7                                                        | Cluster0334 |
| 1429533_at   | Immt                  | inner membrane protein, mitochondrial                                                            | Cluster0334 |
| 1429534_a_at | Immt                  | inner membrane protein, mitochondrial                                                            | Cluster0334 |
| 1431431_a_at | LOC100045796 /// Nfs1 | similar to Nitrogen fixation gene 1 (S. cerevisiae) /// nitrogen fixation gene 1 (S. cerevisiae) | Cluster0334 |
| 1431252_a_at | Zfp655                | zinc finger protein 655                                                                          | Cluster0334 |
| 1422906_at   | Abcg2                 | ATP-binding cassette, sub-family G (WHITE), member 2                                             | Cluster0335 |
| 1419674_a_at | Dpep1                 | dipeptidase 1 (renal)                                                                            | Cluster0335 |
| 1450682_at   | Fabp6                 | fatty acid binding protein 6, ileal (gastrotropin)                                               | Cluster0335 |
| 1457068_at   | Naaladl1              | N-acetylated alpha-linked acidic dipeptidase-like 1                                              | Cluster0335 |
| 1451481_s_at | Osta                  | organic solute transporter alpha                                                                 | Cluster0335 |
| 1454854_at   | Ostb                  | organic solute transporter beta                                                                  | Cluster0335 |
| 1416854_at   | Slc34a2               | solute carrier family 34 (sodium phosphate), member 2                                            | Cluster0335 |
| 1421002_at   | Angptl2               | angiopoietin-like 2                                                                              | Cluster0336 |
| 1450085_at   | Angptl2               | angiopoietin-like 2                                                                              | Cluster0336 |
| 1455090_at   | Angptl2               | angiopoietin-like 2                                                                              | Cluster0336 |
| 1458236_at   | NA                    | ---                                                                                              | Cluster0336 |
| 1427665_a_at | Nfic                  | nuclear factor I/C                                                                               | Cluster0336 |
| 1450661_x_at | Nfic                  | nuclear factor I/C                                                                               | Cluster0336 |
| 1421431_at   | Ptrf                  | polymerase I and transcript release factor                                                       | Cluster0336 |
| 1435776_at   | 2310009B15Rik         | RIKEN cDNA 2310009B15 gene                                                                       | Cluster0337 |
| 1452601_a_at | Acbd6                 | acyl-Coenzyme A binding domain containing 6                                                      | Cluster0337 |
| 1428863_at   | Ankrd39               | ankyrin repeat domain 39                                                                         | Cluster0337 |
| 1424197_s_at | Fance                 | Fanconi anemia, complementation group E                                                          | Cluster0337 |
| 1453689_at   | Fance                 | Fanconi anemia, complementation group E                                                          | Cluster0337 |
| 1416335_at   | Mif                   | macrophage migration inhibitory factor                                                           | Cluster0337 |
| 1448604_at   | Uck2                  | uridine-cytidine kinase 2                                                                        | Cluster0337 |
| 1452744_at   | 2210016F16Rik         | RIKEN cDNA 2210016F16 gene                                                                       | Cluster0338 |

|              |                                    |                                                                                            |             |
|--------------|------------------------------------|--------------------------------------------------------------------------------------------|-------------|
| 1455561_at   | Cndp1                              | carnosine dipeptidase 1 (metallopeptidase M20 family)                                      | Cluster0338 |
| 1434657_at   | Gls                                | glutaminase                                                                                | Cluster0338 |
| 1422704_at   | Gyk                                | glycerol kinase                                                                            | Cluster0338 |
| 1419134_at   | Rhbg                               | Rhesus blood group-associated B glycoprotein                                               | Cluster0338 |
| 1419343_at   | Slc15a1                            | solute carrier family 15 (oligopeptide transporter), member 1                              | Cluster0338 |
| 1422899_at   | Slc6a20b                           | solute carrier family 6 (neurotransmitter transporter), member 20B                         | Cluster0338 |
| 1428158_at   | Akt1s1                             | AKT1 substrate 1 (proline-rich)                                                            | Cluster0339 |
| 1422414_a_at | Calm2                              | calmodulin 2                                                                               | Cluster0339 |
| 1428257_s_at | Dynlrb1                            | dynein light chain roadblock-type 1                                                        | Cluster0339 |
| 1425265_a_at | Eri3                               | exoribonuclease 3                                                                          | Cluster0339 |
| 1431593_a_at | Tsen34                             | tRNA splicing endonuclease 34 homolog (S. cerevisiae)                                      | Cluster0339 |
| 1415738_at   | Txndc12                            | thioredoxin domain containing 12 (endoplasmic reticulum)                                   | Cluster0339 |
| 1423030_at   | Vcp                                | valosin containing protein                                                                 | Cluster0339 |
| 1445882_at   | Cd300lb                            | CD300 antigen like family member B                                                         | Cluster0340 |
| 1448390_a_at | Dhrs3                              | dehydrogenase/reductase (SDR family) member 3                                              | Cluster0340 |
| 1429173_at   | Dnase11l                           | deoxyribonuclease 1-like 1                                                                 | Cluster0340 |
| 1434472_at   | Dusp3                              | dual specificity phosphatase 3 (vaccinia virus phosphatase VH1-related)                    | Cluster0340 |
| 1435134_at   | Nceh1                              | arylacetylamide deacetylase-like 1                                                         | Cluster0340 |
| 1435135_at   | Nceh1                              | arylacetylamide deacetylase-like 1                                                         | Cluster0340 |
| 1455227_at   | Nceh1                              | arylacetylamide deacetylase-like 1                                                         | Cluster0340 |
| 1417599_at   | Cd276                              | CD276 antigen                                                                              | Cluster0341 |
| 1448876_at   | Evc                                | Ellis van Creveld gene homolog (human)                                                     | Cluster0341 |
| 1429447_at   | Evc2                               | Ellis van Creveld syndrome 2 homolog (human)                                               | Cluster0341 |
| 1418049_at   | Ltbp3                              | latent transforming growth factor beta binding protein 3                                   | Cluster0341 |
| 1427048_at   | Smo                                | smoothened homolog (Drosophila)                                                            | Cluster0341 |
| 1427049_s_at | Smo                                | smoothened homolog (Drosophila)                                                            | Cluster0341 |
| 1449041_a_at | Trip6                              | thyroid hormone receptor interactor 6                                                      | Cluster0341 |
| 1459855_x_at | Actr1a                             | ARP1 actin-related protein 1 homolog A, centractin alpha (yeast)                           | Cluster0342 |
| 1459799_at   | Farp1                              | FERM, RhoGEF (Arhgef) and pleckstrin domain protein 1 (chondrocyte-derived)                | Cluster0342 |
| 1436682_at   | Gm9844 /// LOC100048142 /// Tmsb1C | predicted gene 9844 /// similar to thymosin, beta 10 /// thymosin, beta 10                 | Cluster0342 |
| 1441122_at   | LOC639236                          | hypothetical protein LOC639236                                                             | Cluster0342 |
| 1441754_at   | NA                                 | ---                                                                                        | Cluster0342 |
| 1447680_at   | NA                                 | ---                                                                                        | Cluster0342 |
| 1456734_at   | Txn1                               | thioredoxin 1                                                                              | Cluster0342 |
| 1430378_at   | 2900011G08Rik                      | RIKEN cDNA 2900011G08 gene                                                                 | Cluster0343 |
| 1457911_at   | A930002I21Rik                      | RIKEN cDNA A930002I21 gene                                                                 | Cluster0343 |
| 1444078_at   | Cd8a                               | CD8 antigen, alpha chain                                                                   | Cluster0343 |
| 1426170_a_at | Cd8b1                              | CD8 antigen, beta chain 1                                                                  | Cluster0343 |
| 1449903_at   | Crtam                              | cytotoxic and regulatory T cell molecule                                                   | Cluster0343 |
| 1437602_at   | Fam71b                             | family with sequence similarity 71, member B                                               | Cluster0343 |
| 1442380_at   | Lcn4                               | lipocalin 4                                                                                | Cluster0343 |
| 1419334_at   | Ctla4                              | cytotoxic T-lymphocyte-associated protein 4                                                | Cluster0344 |
| 1420700_s_at | Folr4                              | folate receptor 4 (delta)                                                                  | Cluster0344 |
| 1420765_a_at | Foxp3                              | forkhead box P3                                                                            | Cluster0344 |
| 1423415_at   | Gpr83                              | G protein-coupled receptor 83                                                              | Cluster0344 |
| 1439569_at   | Gpr83                              | G protein-coupled receptor 83                                                              | Cluster0344 |
| 1459643_at   | NA                                 | ---                                                                                        | Cluster0344 |
| 1420351_at   | Tnfrsf4                            | tumor necrosis factor receptor superfamily, member 4                                       | Cluster0344 |
| 1426510_at   | LOC100044896 /// Scppdh            | similar to Saccharopine dehydrogenase (putative) /// saccharopine dehydrogenase (putative) | Cluster0345 |
| 1434943_at   | Morn4                              | MORN repeat containing 4                                                                   | Cluster0345 |
| 1457316_at   | Mtap6                              | microtubule-associated protein 6                                                           | Cluster0345 |
| 1415824_at   | Scd2                               | stearoyl-Coenzyme A desaturase 2                                                           | Cluster0345 |
| 1431015_at   | Tmem129                            | transmembrane protein 129                                                                  | Cluster0345 |
| 1455592_at   | Vangl2                             | vang-like 2 (van gogh, Drosophila)                                                         | Cluster0345 |
| 1422616_s_at | Wdr54                              | WD repeat domain 54                                                                        | Cluster0345 |
| 1437629_at   | Arhgef19                           | Rho guanine nucleotide exchange factor (GEF) 19                                            | Cluster0346 |
| 1435446_a_at | Chpt1                              | choline phosphotransferase 1                                                               | Cluster0346 |

|              |               |                                                                            |             |
|--------------|---------------|----------------------------------------------------------------------------|-------------|
| 1460401_at   | Edem3         | ER degradation enhancer, mannosidase alpha-like 3                          | Cluster0346 |
| 1429407_at   | Pex11c        | peroxisomal biogenesis factor 11 gamma                                     | Cluster0346 |
| 1426123_a_at | Rrbp1         | ribosome binding protein 1                                                 | Cluster0346 |
| 1449221_a_at | Rrbp1         | ribosome binding protein 1                                                 | Cluster0346 |
| 1423621_a_at | Slc33a1       | solute carrier family 33 (acetyl-CoA transporter), member 1                | Cluster0346 |
| 1433161_at   | 1700008N17Rik | RIKEN cDNA 1700008N17 gene                                                 | Cluster0347 |
| 1454428_at   | 4930467D19Rik | RIKEN cDNA 4930467D19 gene                                                 | Cluster0347 |
| 1429208_at   | 5730408K05Rik | RIKEN cDNA 5730408K05 gene                                                 | Cluster0347 |
| 1432830_at   | Ccdc138       | coiled-coil domain containing 138                                          | Cluster0347 |
| 1445614_at   | NA            | ---                                                                        | Cluster0347 |
| 1446796_at   | NA            | ---                                                                        | Cluster0347 |
| 1457609_at   | NA            | ---                                                                        | Cluster0347 |
| 1447839_x_at | Adm           | adrenomedullin                                                             | Cluster0348 |
| 1417839_at   | Cldn5         | claudin 5                                                                  | Cluster0348 |
| 1432176_a_at | Eng           | endoglin                                                                   | Cluster0348 |
| 1440225_at   | Gpr116        | G protein-coupled receptor 116                                             | Cluster0348 |
| 1437928_at   | Pcdh12        | protocadherin 12                                                           | Cluster0348 |
| 1418090_at   | Plvap         | plasmalemma vesicle associated protein                                     | Cluster0348 |
| 1428776_at   | Slc10a6       | solute carrier family 10 (sodium/bile acid cotransporter family), member 6 | Cluster0348 |
| 1460429_at   | Cdc5l         | cell division cycle 5-like (S. pombe)                                      | Cluster0349 |
| 1429724_at   | Prpf4         | PRP4 pre-mRNA processing factor 4 homolog (yeast)                          | Cluster0349 |
| 1437179_at   | Rif1          | Rap1 interacting factor 1 homolog (yeast)                                  | Cluster0349 |
| 1442939_at   | Rif1          | Rap1 interacting factor 1 homolog (yeast)                                  | Cluster0349 |
| 1426891_at   | Rpap1         | RNA polymerase II associated protein 1                                     | Cluster0349 |
| 1418380_at   | Terf1         | telomeric repeat binding factor 1                                          | Cluster0349 |
| 1415869_a_at | Trim28        | tripartite motif-containing 28                                             | Cluster0349 |
| 1438487_s_at | Zzz3          | zinc finger, ZZ domain containing 3                                        | No Class    |
| 1453583_at   | Zzef1         | zinc finger, ZZ-type with EF hand domain 1                                 | No Class    |
| 1438691_at   | Zzef1         | zinc finger, ZZ-type with EF hand domain 1                                 | No Class    |
| 1429787_x_at | Zwint         | ZW10 interactor                                                            | No Class    |
| 1429786_a_at | Zwint         | ZW10 interactor                                                            | No Class    |
| 1445206_at   | Zw10          | ZW10 homolog (Drosophila), centromere/kinetochore protein                  | No Class    |
| 1459722_at   | Zswim6        | Zinc finger, SWIM domain containing 6                                      | No Class    |
| 1431891_at   | Zswim5        | zinc finger, SWIM domain containing 5                                      | No Class    |
| 1455544_at   | Zranb3        | zinc finger, RAN-binding domain containing 3                               | No Class    |
| 1453617_at   | Zranb3        | zinc finger, RAN-binding domain containing 3                               | No Class    |
| 1453992_at   | Zpbp          | zona pellucida binding protein                                             | No Class    |
| 1455290_at   | Znrf2         | zinc and ring finger 2                                                     | No Class    |
| 1434017_at   | Znrf2         | zinc and ring finger 2                                                     | No Class    |
| 1431154_at   | Znrf2         | zinc and ring finger 2                                                     | No Class    |
| 1454214_a_at | Znhit6        | zinc finger, HIT type 6                                                    | No Class    |
| 1451745_a_at | Znhit1        | zinc finger, HIT domain containing 1                                       | No Class    |
| 1425531_at   | Znhit1        | zinc finger, HIT domain containing 1                                       | No Class    |
| 1441245_a_at | Znf512b       | zinc finger protein 512B                                                   | No Class    |
| 1458617_at   | Zmynd8        | zinc finger, MYND-type containing 8                                        | No Class    |
| 1445827_at   | Zmynd8        | Zinc finger, MYND-type containing 8                                        | No Class    |
| 1440205_at   | Zmynd19       | zinc finger, MYND domain containing 19                                     | No Class    |
| 1436153_a_at | Zmynd11       | zinc finger, MYND domain containing 11                                     | No Class    |
| 1425577_at   | Zmym5         | zinc finger, MYM-type 5                                                    | No Class    |
| 1449353_at   | Zmat3         | zinc finger matrin type 3                                                  | No Class    |
| 1448920_at   | Zkscan6       | zinc finger with KRAB and SCAN domains 6                                   | No Class    |
| 1449512_a_at | Zfx           | zinc finger protein X-linked                                               | No Class    |
| 1428046_a_at | Zfx           | zinc finger protein X-linked                                               | No Class    |
| 1425972_a_at | Zfx           | zinc finger protein X-linked                                               | No Class    |
| 1456483_at   | Zfp9          | zinc finger protein 9                                                      | No Class    |
| 1443640_at   | Zfp882        | zinc finger protein 882                                                    | No Class    |
| 1418291_at   | Zfp87         | zinc finger protein 87                                                     | No Class    |



|              |                      |                                                                        |          |
|--------------|----------------------|------------------------------------------------------------------------|----------|
| 1454679_at   | Zfp828               | zinc finger protein 828                                                | No Class |
| 1428748_at   | Zfp826               | zinc finger protein 826                                                | No Class |
| 1426293_at   | Zfp790               | zinc finger protein 790                                                | No Class |
| 1451902_at   | Zfp758               | zinc finger protein 758                                                | No Class |
| 1456324_at   | Zfp748               | zinc finger protein 748                                                | No Class |
| 1424752_x_at | Zfp71-rs1 /// Zfp738 | zinc finger protein 71, related sequence /// zinc finger protein 738   | No Class |
| 1440778_x_at | Zfp712               | Zinc finger protein 712                                                | No Class |
| 1459386_at   | Zfp709               | zinc finger protein 709                                                | No Class |
| 1440710_at   | Zfp706               | zinc finger protein 706                                                | No Class |
| 1426679_at   | Zfp706               | zinc finger protein 706                                                | No Class |
| 1440999_at   | Zfp697               | zinc finger protein 697                                                | No Class |
| 1457462_at   | Zfp68                | zinc finger protein 68                                                 | No Class |
| 1427969_s_at | Zfp654               | zinc finger protein 654                                                | No Class |
| 1455633_at   | Zfp647               | zinc finger protein 647                                                | No Class |
| 1456431_at   | Zfp64                | Zinc finger protein 64                                                 | No Class |
| 1421030_at   | Zfp64                | zinc finger protein 64                                                 | No Class |
| 1434689_at   | Zfp637               | zinc finger protein 637                                                | No Class |
| 1425495_at   | Zfp62                | zinc finger protein 62                                                 | No Class |
| 1453247_at   | Zfp618               | zinc fingerprotein 618                                                 | No Class |
| 1436190_at   | Zfp618               | zinc fingerprotein 618                                                 | No Class |
| 1456824_at   | Zfp612               | zinc finger protein 612                                                | No Class |
| 1427104_at   | Zfp612               | zinc finger protein 612                                                | No Class |
| 1422954_at   | Zfp60                | zinc finger protein 60                                                 | No Class |
| 1447703_x_at | Zfp593               | zinc finger protein 593                                                | No Class |
| 1460620_at   | Zfp592               | zinc finger protein 592                                                | No Class |
| 1454864_at   | Zfp592               | zinc finger protein 592                                                | No Class |
| 1425007_at   | Zfp566               | zinc finger protein 566                                                | No Class |
| 1426564_at   | Zfp553               | zinc finger protein 553                                                | No Class |
| 1440672_at   | Zfp541               | zinc finger protein 541                                                | No Class |
| 1435669_at   | Zfp532               | zinc finger protein 532                                                | No Class |
| 1445201_at   | Zfp53                | zinc finger protein 53                                                 | No Class |
| 1426472_at   | Zfp52                | zinc finger protein 52                                                 | No Class |
| 1423836_at   | Zfp503               | zinc finger protein 503                                                | No Class |
| 1436606_at   | Zfp498               | Zinc finger protein 498                                                | No Class |
| 1425058_at   | Zfp472               | zinc finger protein 472                                                | No Class |
| 1427255_s_at | Zfp445               | zinc finger protein 445                                                | No Class |
| 1439475_at   | Zfp429               | zinc finger protein 429                                                | No Class |
| 1424490_at   | Zfp428               | zinc finger protein 428                                                | No Class |
| 1459690_at   | Zfp426               | zinc finger protein 426                                                | No Class |
| 1419380_at   | Zfp423               | zinc finger protein 423                                                | No Class |
| 1459998_at   | Zfp407               | zinc finger protein 407                                                | No Class |
| 1435984_at   | Zfp40                | Zinc finger protein 40                                                 | No Class |
| 1456639_at   | Zfp398               | zinc finger protein 398                                                | No Class |
| 1435615_at   | Zfp365               | zinc finger protein 365                                                | No Class |
| 1433583_at   | Zfp365               | zinc finger protein 365                                                | No Class |
| 1425880_x_at | Zfp352               | zinc finger protein 352                                                | No Class |
| 1420110_s_at | Zfp334               | zinc finger protein 334                                                | No Class |
| 1451216_at   | Zfp330               | zinc finger protein 330                                                | No Class |
| 1452374_at   | Zfp322a              | zinc finger protein 322A                                               | No Class |
| 1430558_at   | Zfp318               | zinc finger protein 318                                                | No Class |
| 1449515_at   | Zfp292               | zinc finger protein 292                                                | No Class |
| 1436308_at   | Zfp292               | zinc finger protein 292                                                | No Class |
| 1419575_s_at | Zfp292               | zinc finger protein 292                                                | No Class |
| 1457455_at   | Zfp280d              | zinc finger protein 280D                                               | No Class |
| 1443362_at   | Zfp277               | zinc finger protein 277                                                | No Class |
| 1455503_at   | Zfp273 /// Zfp85-rs1 | zinc finger protein 273 /// zinc finger protein 85, related sequence 1 | No Class |
| 1427831_s_at | Zfp260               | zinc finger protein 260                                                | No Class |

|              |             |                                                                 |          |
|--------------|-------------|-----------------------------------------------------------------|----------|
| 1419165_at   | Zfp260      | zinc finger protein 260                                         | No Class |
| 1419164_at   | Zfp260      | zinc finger protein 260                                         | No Class |
| 1427120_at   | Zfp26       | zinc finger protein 26                                          | No Class |
| 1428294_at   | Zfp259      | zinc finger protein 259                                         | No Class |
| 1458267_at   | Zfp248      | zinc finger protein 248                                         | No Class |
| 1455153_at   | Zfp236      | zinc finger protein 236                                         | No Class |
| 1455092_at   | Zfp207      | zinc finger protein 207                                         | No Class |
| 1438515_at   | Zfp207      | zinc finger protein 207                                         | No Class |
| 1420944_at   | Zfp185      | zinc finger protein 185                                         | No Class |
| 1437585_x_at | Zfp161      | zinc finger protein 161                                         | No Class |
| 1420865_at   | Zfp161      | zinc finger protein 161                                         | No Class |
| 1455483_at   | Zfp148      | zinc finger protein 148                                         | No Class |
| 1449068_at   | Zfp148      | zinc finger protein 148                                         | No Class |
| 1422135_at   | Zfp146      | zinc finger protein 146                                         | No Class |
| 1454885_at   | Zfp141      | zinc finger protein 141                                         | No Class |
| 1437237_x_at | Zfp110      | zinc finger protein 110                                         | No Class |
| 1437236_a_at | Zfp110      | zinc finger protein 110                                         | No Class |
| 1437556_at   | Zfhx4       | zinc finger homeodomain 4                                       | No Class |
| 1421433_at   | Zfhx4       | zinc finger homeodomain 4                                       | No Class |
| 1449947_s_at | Zfhx3       | zinc finger homeobox 3                                          | No Class |
| 1420650_at   | Zfhx3       | zinc finger homeobox 3                                          | No Class |
| 1420649_at   | Zfhx3       | zinc finger homeobox 3                                          | No Class |
| 1453224_at   | Zfand5      | zinc finger, AN1-type domain 5                                  | No Class |
| 1449702_at   | Zfand2a     | zinc finger, AN1-type domain 2A                                 | No Class |
| 1415941_s_at | Zfand2a     | zinc finger, AN1-type domain 2A                                 | No Class |
| 1415940_at   | Zfand2a     | zinc finger, AN1-type domain 2A                                 | No Class |
| 1439404_x_at | Zfa /// Zfx | zinc finger protein, autosomal /// zinc finger protein X-linked | No Class |
| 1428047_s_at | Zfa /// Zfx | zinc finger protein, autosomal /// zinc finger protein X-linked | No Class |
| 1458941_at   | Zeb2        | zinc finger E-box binding homeobox 2                            | No Class |
| 1456389_at   | Zeb2        | zinc finger E-box binding homeobox 2                            | No Class |
| 1454200_at   | Zeb2        | zinc finger E-box binding homeobox 2                            | No Class |
| 1434298_at   | Zeb2        | zinc finger E-box binding homeobox 2                            | No Class |
| 1422748_at   | Zeb2        | zinc finger E-box binding homeobox 2                            | No Class |
| 1446127_at   | Zeb1        | Zinc finger E-box binding homeobox 1                            | No Class |
| 1420243_at   | Zeb1        | zinc finger E-box binding homeobox 1                            | No Class |
| 1426310_at   | Zdhhc5      | zinc finger, DHHc domain containing 5                           | No Class |
| 1430611_at   | Zdhhc25     | zinc finger, DHHc domain containing 25                          | No Class |
| 1453481_at   | Zdhhc2      | zinc finger, DHHc domain containing 2                           | No Class |
| 1452655_at   | Zdhhc2      | zinc finger, DHHc domain containing 2                           | No Class |
| 1458084_at   | Zdhhc17     | Zinc finger, DHHc domain containing 17                          | No Class |
| 1438975_x_at | Zdhhc14     | zinc finger, DHHc domain containing 14                          | No Class |
| 1438619_x_at | Zdhhc14     | zinc finger, DHHc domain containing 14                          | No Class |
| 1437614_x_at | Zdhhc14     | zinc finger, DHHc domain containing 14                          | No Class |
| 1423668_at   | Zdhhc14     | zinc finger, DHHc domain containing 14                          | No Class |
| 1428432_at   | Zcchc24     | zinc finger, CCHc domain containing 24                          | No Class |
| 1428431_at   | Zcchc24     | zinc finger, CCHc domain containing 24                          | No Class |
| 1418170_a_at | Zcchc14     | zinc finger, CCHc domain containing 14                          | No Class |
| 1418169_at   | Zcchc14     | zinc finger, CCHc domain containing 14                          | No Class |
| 1418168_at   | Zcchc14     | zinc finger, CCHc domain containing 14                          | No Class |
| 1441545_at   | Zcchc11     | zinc finger, CCHc domain containing 11                          | No Class |
| 1437395_at   | Zcchc11     | zinc finger, CCHc domain containing 11                          | No Class |
| 1436183_at   | Zc3hav1     | zinc finger CCCH type, antiviral 1                              | No Class |
| 1428378_at   | Zc3hav1     | zinc finger CCCH type, antiviral 1                              | No Class |
| 1418495_at   | Zc3h8       | zinc finger CCCH type containing 8                              | No Class |
| 1457458_at   | Zc3h4       | zinc finger CCCH-type containing 4                              | No Class |
| 1453684_s_at | Zc3h15      | zinc finger CCCH-type containing 15                             | No Class |
| 1427877_at   | Zc3h15      | zinc finger CCCH-type containing 15                             | No Class |

|              |                           |                                                                                                         |          |
|--------------|---------------------------|---------------------------------------------------------------------------------------------------------|----------|
| 1431745_a_at | Zc3h14                    | zinc finger CCCH type containing 14                                                                     | No Class |
| 1430568_at   | Zc3h13                    | zinc finger CCCH type containing 13                                                                     | No Class |
| 1444402_at   | Zc3h12c                   | zinc finger CCCH type containing 12C                                                                    | No Class |
| 1441787_at   | Zc3h12c                   | zinc finger CCCH type containing 12C                                                                    | No Class |
| 1437111_at   | Zc3h12c                   | zinc finger CCCH type containing 12C                                                                    | No Class |
| 1427348_at   | Zc3h12a                   | zinc finger CCCH type containing 12A                                                                    | No Class |
| 1454884_at   | Zbtb46                    | zinc finger and BTB domain containing 46                                                                | No Class |
| 1457293_at   | Zbtb4                     | zinc finger and BTB domain containing 4                                                                 | No Class |
| 1439128_at   | Zbtb20                    | zinc finger and BTB domain containing 20                                                                | No Class |
| 1438443_at   | Zbtb20                    | zinc finger and BTB domain containing 20                                                                | No Class |
| 1437066_at   | Zbtb20                    | zinc finger and BTB domain containing 20                                                                | No Class |
| 1422064_a_at | Zbtb20                    | zinc finger and BTB domain containing 20                                                                | No Class |
| 1419874_x_at | Zbtb16                    | zinc finger and BTB domain containing 16                                                                | No Class |
| 1441112_at   | Zbed6                     | zinc finger, BED domain containing 6                                                                    | No Class |
| 1437097_at   | Zbed3                     | zinc finger, BED domain containing 3                                                                    | No Class |
| 1422701_at   | Zap70                     | zeta-chain (TCR) associated protein kinase                                                              | No Class |
| 1448219_a_at | Ywhaz                     | tyrosine 3-monooxygenase/tryptophan 5-monooxygenase activation protein, zeta polypeptide                | No Class |
| 1448218_s_at | Ywhaz                     | tyrosine 3-monooxygenase/tryptophan 5-monooxygenase activation protein, zeta polypeptide                | No Class |
| 1416102_at   | Ywhaz                     | tyrosine 3-monooxygenase/tryptophan 5-monooxygenase activation protein, zeta polypeptide                | No Class |
| 1460621_x_at | Ywhaq                     | tyrosine 3-monooxygenase/tryptophan 5-monooxygenase activation protein, theta polypeptide               | No Class |
| 1437608_x_at | Ywhaq                     | tyrosine 3-monooxygenase/tryptophan 5-monooxygenase activation protein, theta polypeptide               | No Class |
| 1420830_x_at | Ywhaq                     | tyrosine 3-monooxygenase/tryptophan 5-monooxygenase activation protein, theta polypeptide               | No Class |
| 1420829_a_at | Ywhaq                     | tyrosine 3-monooxygenase/tryptophan 5-monooxygenase activation protein, theta polypeptide               | No Class |
| 1420828_s_at | Ywhaq                     | tyrosine 3-monooxygenase/tryptophan 5-monooxygenase activation protein, theta polypeptide               | No Class |
| 1450012_x_at | Ywhag                     | tyrosine 3-monooxygenase/tryptophan 5-monooxygenase activation protein, gamma polypeptide               | No Class |
| 1420817_at   | Ywhag                     | tyrosine 3-monooxygenase/tryptophan 5-monooxygenase activation protein, gamma polypeptide               | No Class |
| 1455815_a_at | Ywhab                     | tyrosine 3-monooxygenase/tryptophan 5-monooxygenase activation protein, beta polypeptide                | No Class |
| 1436783_x_at | Ywhab                     | tyrosine 3-monooxygenase/tryptophan 5-monooxygenase activation protein, beta polypeptide                | No Class |
| 1420879_a_at | Ywhab                     | tyrosine 3-monooxygenase/tryptophan 5-monooxygenase activation protein, beta polypeptide                | No Class |
| 1420878_a_at | Ywhab                     | tyrosine 3-monooxygenase/tryptophan 5-monooxygenase activation protein, beta polypeptide                | No Class |
| 1437456_x_at | Ythdf1                    | YTH domain family 1                                                                                     | No Class |
| 1456699_s_at | Ythdc1                    | YTH domain containing 1                                                                                 | No Class |
| 1426827_at   | Ythdc1                    | YTH domain containing 1                                                                                 | No Class |
| 1450954_at   | Yme1l1                    | YME1-like 1 (S. cerevisiae)                                                                             | No Class |
| 1423361_at   | Yme1l1                    | YME1-like 1 (S. cerevisiae)                                                                             | No Class |
| 1460191_at   | Ykt6                      | YKT6 homolog (S. Cerevisiae)                                                                            | No Class |
| 1448464_at   | Ykt6                      | YKT6 homolog (S. Cerevisiae)                                                                            | No Class |
| 1442647_at   | Yip1                      | Yip1 domain family, member 1                                                                            | No Class |
| 1423940_at   | Yif1a                     | Yip1 interacting factor homolog A (S. cerevisiae)                                                       | No Class |
| 1458878_at   | Yes1                      | Yamaguchi sarcoma viral (v-yes) oncogene homolog 1                                                      | No Class |
| 1460638_at   | Yars                      | tyrosyl-tRNA synthetase                                                                                 | No Class |
| 1452515_a_at | Xylt2                     | xylosyltransferase II                                                                                   | No Class |
| 1450777_at   | Xrn2                      | 5-3' exoribonuclease 2                                                                                  | No Class |
| 1422842_at   | Xrn2                      | 5-3' exoribonuclease 2                                                                                  | No Class |
| 1453380_a_at | Xrcc6bp1                  | XRCC6 binding protein 1                                                                                 | No Class |
| 1417437_at   | Xrcc6                     | X-ray repair complementing defective repair in Chinese hamster cells 6                                  | No Class |
| 1437623_x_at | Xrcc3                     | X-ray repair complementing defective repair in Chinese hamster cells 3                                  | No Class |
| 1450130_at   | Xpr1                      | xenotropic and polytropic retrovirus receptor 1                                                         | No Class |
| 1426993_at   | Xpr1                      | xenotropic and polytropic retrovirus receptor 1                                                         | No Class |
| 1426053_a_at | Xpr1                      | xenotropic and polytropic retrovirus receptor 1                                                         | No Class |
| 1441682_s_at | Xpot                      | exportin, tRNA (nuclear export receptor for tRNAs)                                                      | No Class |
| 1428949_at   | Xpot                      | exportin, tRNA (nuclear export receptor for tRNAs)                                                      | No Class |
| 1428772_at   | Xpot                      | exportin, tRNA (nuclear export receptor for tRNAs)                                                      | No Class |
| 1442528_at   | Xpo4                      | exportin 4                                                                                              | No Class |
| 1418442_at   | Xpo1                      | exportin 1, CRM1 homolog (yeast)                                                                        | No Class |
| 1443483_at   | Xlr5a /// Xlr5b /// Xlr5c | X-linked lymphocyte-regulated 5A /// X-linked lymphocyte-regulated 5B /// X-linked lymphocyte-regulated | No Class |
| 1422933_at   | Xlr5a /// Xlr5b /// Xlr5c | X-linked lymphocyte-regulated 5A /// X-linked lymphocyte-regulated 5B /// X-linked lymphocyte-regulated | No Class |

|              |                           |                                                                                                         |          |
|--------------|---------------------------|---------------------------------------------------------------------------------------------------------|----------|
| 1449347_a_at | Xlr4a /// Xlr4b /// Xlr4c | X-linked lymphocyte-regulated 4A /// X-linked lymphocyte-regulated 4B /// X-linked lymphocyte-regulated | No Class |
| 1454762_at   | Xkrx                      | X Kell blood group precursor related X linked                                                           | No Class |
| 1437223_s_at | Xbp1                      | X-box binding protein 1                                                                                 | No Class |
| 1420886_a_at | Xbp1                      | X-box binding protein 1                                                                                 | No Class |
| 1420011_s_at | Xbp1                      | X-box binding protein 1                                                                                 | No Class |
| 1452299_at   | Wwp1                      | WW domain containing E3 ubiquitin protein ligase 1                                                      | No Class |
| 1427098_at   | Wwp1                      | WW domain containing E3 ubiquitin protein ligase 1                                                      | No Class |
| 1427097_at   | Wwp1                      | WW domain containing E3 ubiquitin protein ligase 1                                                      | No Class |
| 1431942_at   | Wwox                      | WW domain-containing oxidoreductase                                                                     | No Class |
| 1448611_at   | Wwc2                      | WW, C2 and coiled-coil domain containing 2                                                              | No Class |
| 1417198_at   | Wwc2                      | WW, C2 and coiled-coil domain containing 2                                                              | No Class |
| 1417197_at   | Wwc2                      | WW, C2 and coiled-coil domain containing 2                                                              | No Class |
| 1417196_s_at | Wwc2                      | WW, C2 and coiled-coil domain containing 2                                                              | No Class |
| 1417195_at   | Wwc2                      | WW, C2 and coiled-coil domain containing 2                                                              | No Class |
| 1438129_at   | Wsb2                      | WD repeat and SOCS box-containing 2                                                                     | No Class |
| 1435980_x_at | Wnt6                      | wingless-related MMTV integration site 6                                                                | No Class |
| 1448818_at   | Wnt5a                     | wingless-related MMTV integration site 5A                                                               | No Class |
| 1437673_at   | Wnt5a                     | wingless-related MMTV integration site 5A                                                               | No Class |
| 1436791_at   | Wnt5a                     | wingless-related MMTV integration site 5A                                                               | No Class |
| 1422093_at   | Wnt3a                     | wingless-related MMTV integration site 3A                                                               | No Class |
| 1425377_at   | Wnt1                      | wingless-related MMTV integration site 1                                                                | No Class |
| 1427196_at   | Wnk4                      | WNK lysine deficient protein kinase 4                                                                   | No Class |
| 1428882_at   | Wipi2                     | WD repeat domain, phosphoinositide interacting 2                                                        | No Class |
| 1456624_at   | Wipi1                     | WD repeat domain, phosphoinositide interacting 1                                                        | No Class |
| 1452392_a_at | Wipi1                     | WD repeat domain, phosphoinositide interacting 1                                                        | No Class |
| 1439060_s_at | Wipi1                     | WD repeat domain, phosphoinositide interacting 1                                                        | No Class |
| 1438709_at   | Wipi1                     | WD repeat domain, phosphoinositide interacting 1                                                        | No Class |
| 1424917_a_at | Wipi1                     | WD repeat domain, phosphoinositide interacting 1                                                        | No Class |
| 1437298_at   | Wipf2                     | WAS/WASL interacting protein family, member 2                                                           | No Class |
| 1436954_at   | Wipf1                     | WAS/WASL interacting protein family, member 1                                                           | No Class |
| 1436953_at   | Wipf1                     | WAS/WASL interacting protein family, member 1                                                           | No Class |
| 1427248_at   | Whsc2                     | Wolf-Hirschhorn syndrome candidate 2 (human)                                                            | No Class |
| 1457794_at   | Whsc11                    | Wolf-Hirschhorn syndrome candidate 1-like 1 (human)                                                     | No Class |
| 1436036_at   | Whsc1                     | Wolf-Hirschhorn syndrome candidate 1 (human)                                                            | No Class |
| 1428827_at   | Whsc1                     | Wolf-Hirschhorn syndrome candidate 1 (human)                                                            | No Class |
| 1438433_at   | Whamm                     | WAS protein homolog associated with actin, golgi membranes and microtubules                             | No Class |
| 1457766_at   | Wfdc6a                    | WAP four-disulfide core domain 6A                                                                       | No Class |
| 1424351_at   | Wfdc2                     | WAP four-disulfide core domain 2                                                                        | No Class |
| 1431335_a_at | Wfdc1                     | WAP four-disulfide core domain 1                                                                        | No Class |
| 1432489_a_at | Wdyhv1                    | WDYHV motif containing 1                                                                                | No Class |
| 1454922_at   | Wdr92                     | WD repeat domain 92                                                                                     | No Class |
| 1426767_at   | Wdr90                     | WD repeat domain 90                                                                                     | No Class |
| 1451649_a_at | Wdr75                     | WD repeat domain 75                                                                                     | No Class |
| 1430082_at   | Wdr64                     | WD repeat domain 64                                                                                     | No Class |
| 1459985_at   | Wdr61                     | WD repeat domain 61                                                                                     | No Class |
| 1455940_x_at | Wdr6                      | WD repeat domain 6                                                                                      | No Class |
| 1415770_at   | Wdr6                      | WD repeat domain 6                                                                                      | No Class |
| 1416581_at   | Wdr5                      | WD repeat domain 5                                                                                      | No Class |
| 1452162_at   | Wdr48                     | WD repeat domain 48                                                                                     | No Class |
| 1433621_at   | Wdr41                     | WD repeat domain 41                                                                                     | No Class |
| 1454790_at   | Wdr35                     | WD repeat domain 35                                                                                     | No Class |
| 1440318_at   | Wdr35                     | WD repeat domain 35                                                                                     | No Class |
| 1456488_at   | Wdr33                     | WD repeat domain 33                                                                                     | No Class |
| 1445813_at   | Wdr27                     | WD repeat domain 27                                                                                     | No Class |
| 1417270_at   | Wdr12                     | WD repeat domain 12                                                                                     | No Class |
| 1437591_a_at | Wdr1                      | WD repeat domain 1                                                                                      | No Class |
| 1423054_at   | Wdr1                      | WD repeat domain 1                                                                                      | No Class |

|              |         |                                                                         |          |
|--------------|---------|-------------------------------------------------------------------------|----------|
| 1446867_at   | Wdfy4   | WD repeat and FYVE domain containing 4                                  | No Class |
| 1435582_at   | Wdfy4   | WD repeat and FYVE domain containing 4                                  | No Class |
| 1454234_at   | Wbscr28 | Williams-Beuren syndrome chromosome region 28 (human)                   | No Class |
| 1451230_a_at | Wbp5    | WW domain binding protein 5                                             | No Class |
| 1419631_at   | Was     | Wiskott-Aldrich syndrome homolog (human)                                | No Class |
| 1434813_x_at | Wars    | tryptophanyl-tRNA synthetase                                            | No Class |
| 1425106_a_at | Wars    | tryptophanyl-tRNA synthetase                                            | No Class |
| 1415694_at   | Wars    | tryptophanyl-tRNA synthetase                                            | No Class |
| 1437426_at   | Wac     | WW domain containing adaptor with coiled-coil                           | No Class |
| 1435386_at   | Vwf     | Von Willebrand factor homolog                                           | No Class |
| 1456129_at   | Vwa3a   | von Willebrand factor A domain containing 3A                            | No Class |
| 1455098_a_at | Vtn     | vitronectin                                                             | No Class |
| 1420484_a_at | Vtn     | vitronectin                                                             | No Class |
| 1446365_at   | Vti1a   | vesicle transport through interaction with t-SNAREs homolog 1A (yeast)  | No Class |
| 1436591_at   | Vsig10  | V-set and immunoglobulin domain containing 1C                           | No Class |
| 1430553_at   | Vsig1   | V-set and immunoglobulin domain containing 1                            | No Class |
| 1456810_at   | Vps54   | vacuolar protein sorting 54 (yeast)                                     | No Class |
| 1425474_a_at | Vps39   | vacuolar protein sorting 39 (yeast)                                     | No Class |
| 1415784_at   | Vps35   | vacuolar protein sorting 35                                             | No Class |
| 1415783_at   | Vps35   | vacuolar protein sorting 35                                             | No Class |
| 1459001_at   | Vps33a  | Vacuolar protein sorting 33A (yeast)                                    | No Class |
| 1434816_at   | Vps33a  | vacuolar protein sorting 33A (yeast)                                    | No Class |
| 1417660_s_at | Vps29   | vacuolar protein sorting 29 (S. pombe)                                  | No Class |
| 1417659_at   | Vps29   | vacuolar protein sorting 29 (S. pombe)                                  | No Class |
| 1421051_s_at | Vps25   | vacuolar protein sorting 25 (yeast)                                     | No Class |
| 1440146_at   | Vps13a  | vacuolar protein sorting 13A (yeast)                                    | No Class |
| 1422921_at   | Vpreb3  | pre-B lymphocyte gene 3                                                 | No Class |
| 1442169_at   | Vldlr   | very low density lipoprotein receptor                                   | No Class |
| 1438258_at   | Vldlr   | very low density lipoprotein receptor                                   | No Class |
| 1435893_at   | Vldlr   | very low density lipoprotein receptor                                   | No Class |
| 1434465_x_at | Vldlr   | very low density lipoprotein receptor                                   | No Class |
| 1417900_a_at | Vldlr   | very low density lipoprotein receptor                                   | No Class |
| 1428664_at   | Vip     | vasoactive intestinal polypeptide                                       | No Class |
| 1440739_at   | Vegfc   | vascular endothelial growth factor C                                    | No Class |
| 1439766_x_at | Vegfc   | vascular endothelial growth factor C                                    | No Class |
| 1419417_at   | Vegfc   | vascular endothelial growth factor C                                    | No Class |
| 1415990_at   | Vdac2   | voltage-dependent anion channel 2                                       | No Class |
| 1437947_x_at | Vdac1   | voltage-dependent anion channel 1                                       | No Class |
| 1437192_x_at | Vdac1   | voltage-dependent anion channel 1                                       | No Class |
| 1436992_x_at | Vdac1   | voltage-dependent anion channel 1                                       | No Class |
| 1416157_at   | Vcl     | vinculin                                                                | No Class |
| 1416156_at   | Vcl     | vinculin                                                                | No Class |
| 1447887_x_at | Vcan    | versican                                                                | No Class |
| 1427257_at   | Vcan    | versican                                                                | No Class |
| 1427256_at   | Vcan    | versican                                                                | No Class |
| 1421694_a_at | Vcan    | versican                                                                | No Class |
| 1443232_at   | Vax2os2 | Vax2 opposite strand transcript 2                                       | No Class |
| 1417123_at   | Vav3    | vav 3 oncogene                                                          | No Class |
| 1416466_at   | Vapa    | vesicle-associated membrane protein, associated protein A               | No Class |
| 1430522_a_at | Vamp5   | vesicle-associated membrane protein 5                                   | No Class |
| 1456245_x_at | Vamp3   | vesicle-associated membrane protein 3                                   | No Class |
| 1437708_x_at | Vamp3   | vesicle-associated membrane protein 3                                   | No Class |
| 1433693_x_at | Vamp3   | vesicle-associated membrane protein 3                                   | No Class |
| 1426275_a_at | Uxs1    | UDP-glucuronate decarboxylase 1                                         | No Class |
| 1424500_at   | Utp6    | UTP6, small subunit (SSU) processome component, homolog (yeast)         | No Class |
| 1417583_a_at | Utp3    | UTP3, small subunit (SSU) processome component, homolog (S. cerevisiae) | No Class |
| 1455259_a_at | Utp23   | UTP23, small subunit (SSU) processome component, homolog (yeast)        | No Class |

|              |          |                                                                  |          |
|--------------|----------|------------------------------------------------------------------|----------|
| 1429937_at   | Utp23    | UTP23, small subunit (SSU) processome component, homolog (yeast) | No Class |
| 1452252_at   | Utp20    | UTP20, small subunit (SSU) processome component, homolog (yeast) | No Class |
| 1454817_at   | Utp18    | UTP18, small subunit (SSU) processome component, homolog (yeast) | No Class |
| 1435099_at   | Utp14a   | UTP14, U3 small nucleolar ribonucleoprotein, homolog A (yeast)   | No Class |
| 1450039_at   | Usp9x    | ubiquitin specific peptidase 9, X chromosome                     | No Class |
| 1446807_at   | Usp8     | ubiquitin specific peptidase 8                                   | No Class |
| 1437118_at   | Usp7     | ubiquitin specific peptidase 7                                   | No Class |
| 1437007_x_at | Usp39    | ubiquitin specific peptidase 39                                  | No Class |
| 1438212_at   | Usp37    | ubiquitin specific peptidase 37                                  | No Class |
| 1434392_at   | Usp34    | ubiquitin specific peptidase 34                                  | No Class |
| 1419237_at   | Usp29    | ubiquitin specific peptidase 29                                  | No Class |
| 1456043_at   | Usp22    | ubiquitin specific peptidase 22                                  | No Class |
| 1437151_at   | Usp22    | ubiquitin specific peptidase 22                                  | No Class |
| 1446186_at   | Usp15    | ubiquitin specific peptidase 15                                  | No Class |
| 1416208_at   | Usp14    | ubiquitin specific peptidase 14                                  | No Class |
| 1455473_at   | Usp13    | ubiquitin specific peptidase 13 (isopeptidase T-3)               | No Class |
| 1448230_at   | Usp10    | ubiquitin specific peptidase 10                                  | No Class |
| 1451080_at   | Usp1     | ubiquitin specific peptidase 1                                   | No Class |
| 1424274_at   | Uso1     | USO1 homolog, vesicle docking protein (yeast)                    | No Class |
| 1431750_at   | Ush2a    | Usher syndrome 2A (autosomal recessive, mild) homolog (human)    | No Class |
| 1448805_at   | Usf1     | upstream transcription factor 1                                  | No Class |
| 1426164_a_at | Usf1     | upstream transcription factor 1                                  | No Class |
| 1425003_at   | Uroc1    | urocanase domain containing 1                                    | No Class |
| 1431753_x_at | Urm1     | ubiquitin related modifier 1 homolog (S. cerevisiae)             | No Class |
| 1431752_a_at | Urm1     | ubiquitin related modifier 1 homolog (S. cerevisiae)             | No Class |
| 1424079_x_at | Urm1     | ubiquitin related modifier 1 homolog (S. cerevisiae)             | No Class |
| 1456587_x_at | Urgcp    | upregulator of cell proliferation                                | No Class |
| 1438382_x_at | Urgcp    | upregulator of cell proliferation                                | No Class |
| 1454841_at   | Urb1     | URB1 ribosome biogenesis 1 homolog (S. cerevisiae)               | No Class |
| 1430326_s_at | Uqcrc    | ubiquinol-cytochrome c reductase, complex III subunit VII        | No Class |
| 1428782_a_at | Uqcrc1   | ubiquinol-cytochrome c reductase core protein 1                  | No Class |
| 1454881_s_at | Upk3b    | uroplakin 3B                                                     | No Class |
| 1434237_at   | Upk3b    | uroplakin 3B                                                     | No Class |
| 1455464_x_at | Upk1b    | uroplakin 1B                                                     | No Class |
| 1435831_at   | Upk1b    | uroplakin 1B                                                     | No Class |
| 1445777_at   | Upf2     | UPF2 regulator of nonsense transcripts homolog (yeast)           | No Class |
| 1423768_at   | Unc93b1  | unc-93 homolog B1 (C. elegans)                                   | No Class |
| 1419592_at   | Unc5c    | unc-5 homolog C (C. elegans)                                     | No Class |
| 1435110_at   | Unc5b    | unc-5 homolog B (C. elegans)                                     | No Class |
| 1428992_at   | Unc13d   | unc-13 homolog D (C. elegans)                                    | No Class |
| 1455304_at   | Unc13c   | unc-13 homolog C (C. elegans)                                    | No Class |
| 1434859_at   | Umps     | uridine monophosphate synthetase                                 | No Class |
| 1456306_a_at | Umod     | uromodulin                                                       | No Class |
| 1426252_a_at | Umod     | uromodulin                                                       | No Class |
| 1436628_at   | Ulk4     | unc-51-like kinase 4 (C. elegans)                                | No Class |
| 1423513_at   | Uhrf1bp1 | UHRF1 (ICBP90) binding protein 1-like                            | No Class |
| 1444534_at   | Uhrf1bp1 | UHRF1 (ICBP90) binding protein 1                                 | No Class |
| 1451742_a_at | Ugp2     | UDP-glucose pyrophosphorylase 2                                  | No Class |
| 1434486_x_at | Ugp2     | UDP-glucose pyrophosphorylase 2                                  | No Class |
| 1434485_a_at | Ugp2     | UDP-glucose pyrophosphorylase 2                                  | No Class |
| 1426460_a_at | Ugp2     | UDP-glucose pyrophosphorylase 2                                  | No Class |
| 1439863_at   | Ugcg     | UDP-glucose ceramide glucosyltransferase                         | No Class |
| 1418087_at   | Ufd1l    | ubiquitin fusion degradation 1 like                              | No Class |
| 1420658_at   | Ucp3     | uncoupling protein 3 (mitochondrial, proton carrier)             | No Class |
| 1459741_x_at | Ucp2     | uncoupling protein 2 (mitochondrial, proton carrier)             | No Class |
| 1459740_s_at | Ucp2     | uncoupling protein 2 (mitochondrial, proton carrier)             | No Class |
| 1448188_at   | Ucp2     | uncoupling protein 2 (mitochondrial, proton carrier)             | No Class |

|              |                 |                                                                                                              |          |
|--------------|-----------------|--------------------------------------------------------------------------------------------------------------|----------|
| 1439741_x_at | Uck2            | uridine-cytidine kinase 2                                                                                    | No Class |
| 1439740_s_at | Uck2            | uridine-cytidine kinase 2                                                                                    | No Class |
| 1426909_at   | Uck2            | uridine-cytidine kinase 2                                                                                    | No Class |
| 1419453_at   | Uchl5           | ubiquitin carboxyl-terminal esterase L5                                                                      | No Class |
| 1449855_s_at | Uchl3 /// Uchl4 | ubiquitin carboxyl-terminal esterase L3 (ubiquitin thiolesterase) /// ubiquitin carboxyl-terminal esterase L | No Class |
| 1454006_a_at | Ubxn8           | UBX domain protein 8                                                                                         | No Class |
| 1454616_at   | Ubr7            | ubiquitin protein ligase E3 component n-recognin 7 (putative)                                                | No Class |
| 1420971_at   | Ubr1            | ubiquitin protein ligase E3 component n-recognin 1                                                           | No Class |
| 1436632_at   | Ubn2            | ubiuuclein 2                                                                                                 | No Class |
| 1454947_a_at | Ublcp1          | ubiquitin-like domain containing CTD phosphatase 1                                                           | No Class |
| 1415790_at   | Ublcp1          | ubiquitin-like domain containing CTD phosphatase 1                                                           | No Class |
| 1415788_at   | Ublcp1          | ubiquitin-like domain containing CTD phosphatase 1                                                           | No Class |
| 1420392_at   | Ubl4b           | ubiquitin-like 4B                                                                                            | No Class |
| 1432499_a_at | Ube4b           | ubiquitination factor E4B, UFD2 homolog (S. cerevisiae)                                                      | No Class |
| 1423949_at   | Ube2z           | ubiquitin-conjugating enzyme E2Z (putative)                                                                  | No Class |
| 1426398_at   | Ube2w           | ubiquitin-conjugating enzyme E2W (putative)                                                                  | No Class |
| 1417983_a_at | Ube2v2          | ubiquitin-conjugating enzyme E2 variant 2                                                                    | No Class |
| 1415755_a_at | Ube2v1          | ubiquitin-conjugating enzyme E2 variant 1                                                                    | No Class |
| 1422462_at   | Ube2t           | ubiquitin-conjugating enzyme E2T (putative)                                                                  | No Class |
| 1433664_at   | Ube2q2          | ubiquitin-conjugating enzyme E2Q (putative) 2                                                                | No Class |
| 1425858_at   | Ube2m           | ubiquitin-conjugating enzyme E2M (UBC12 homolog, yeast)                                                      | No Class |
| 1424345_s_at | Ube2m           | ubiquitin-conjugating enzyme E2M (UBC12 homolog, yeast)                                                      | No Class |
| 1417172_at   | Ube2l6          | ubiquitin-conjugating enzyme E2L 6                                                                           | No Class |
| 1453189_at   | Ube2i           | ubiquitin-conjugating enzyme E2I                                                                             | No Class |
| 1450275_x_at | Ube2f           | ubiquitin-conjugating enzyme E2F (putative)                                                                  | No Class |
| 1432426_a_at | Ube2f           | ubiquitin-conjugating enzyme E2F (putative)                                                                  | No Class |
| 1429568_x_at | Ube2f           | ubiquitin-conjugating enzyme E2F (putative)                                                                  | No Class |
| 1455479_a_at | Ube2d3          | ubiquitin-conjugating enzyme E2D 3 (UBC4/5 homolog, yeast)                                                   | No Class |
| 1437666_x_at | Ubc             | ubiquitin C                                                                                                  | No Class |
| 1432827_x_at | Ubc             | ubiquitin C                                                                                                  | No Class |
| 1425966_x_at | Ubc             | ubiquitin C                                                                                                  | No Class |
| 1436805_at   | Ubash3b         | ubiquitin associated and SH3 domain containing, B                                                            | No Class |
| 1456065_at   | Ubash3a         | ubiquitin associated and SH3 domain containing, A                                                            | No Class |
| 1433541_a_at | Ubap2l          | ubiquitin associated protein 2-like                                                                          | No Class |
| 1444624_at   | Ubap1           | ubiquitin-associated protein 1                                                                               | No Class |
| 1437317_at   | Uba7            | ubiquitin-like modifier activating enzyme 7                                                                  | No Class |
| 1426971_at   | Uba7            | ubiquitin-like modifier activating enzyme 7                                                                  | No Class |
| 1451973_at   | Uba5            | ubiquitin-like modifier activating enzyme 5                                                                  | No Class |
| 1448283_a_at | Uba2            | ubiquitin-like modifier activating enzyme 2                                                                  | No Class |
| 1437278_a_at | Uba2            | ubiquitin-like modifier activating enzyme 2                                                                  | No Class |
| 1433440_x_at | Uba2            | ubiquitin-like modifier activating enzyme 2                                                                  | No Class |
| 1460667_at   | U90926          | cDNA sequence U90926                                                                                         | No Class |
| 1439423_x_at | U46068          | cDNA sequence U46068                                                                                         | No Class |
| 1435728_at   | Tyw3            | tRNA-yW synthesizing protein 3 homolog (S. cerevisiae)                                                       | No Class |
| 1450792_at   | Tyrobp          | TYRO protein tyrosine kinase binding protein                                                                 | No Class |
| 1427811_at   | Tyms            | thymidylate synthase                                                                                         | No Class |
| 1423869_s_at | Txnrd3          | thioredoxin reductase 3                                                                                      | No Class |
| 1423868_at   | Txnrd3          | thioredoxin reductase 3                                                                                      | No Class |
| 1451936_a_at | Txnrd2          | thioredoxin reductase 2                                                                                      | No Class |
| 1423299_at   | Txn1            | thioredoxin-like 1                                                                                           | No Class |
| 1424512_a_at | Txndc9          | thioredoxin domain containing 9                                                                              | No Class |
| 1423035_s_at | Txndc17         | thioredoxin domain containing 17                                                                             | No Class |
| 1423034_at   | Txndc17         | thioredoxin domain containing 17                                                                             | No Class |
| 1452782_a_at | Txn2            | thioredoxin 2                                                                                                | No Class |
| 1426179_a_at | Twsg1           | twisted gastrulation homolog 1 (Drosophila)                                                                  | No Class |
| 1421832_at   | Twsg1           | twisted gastrulation homolog 1 (Drosophila)                                                                  | No Class |
| 1428634_at   | Twistnb         | TWIST neighbor                                                                                               | No Class |

|              |         |                                                                    |          |
|--------------|---------|--------------------------------------------------------------------|----------|
| 1428633_at   | Twistnb | TWIST neighbor                                                     | No Class |
| 1448925_at   | Twist2  | twist homolog 2 (Drosophila)                                       | No Class |
| 1421662_a_at | Tusc3   | tumor suppressor candidate 3                                       | No Class |
| 1453386_at   | Tusc1   | tumor suppressor candidate 1                                       | No Class |
| 1451582_at   | Tulp1   | tubby like protein 1                                               | No Class |
| 1449673_s_at | Tufm    | Tu translation elongation factor, mitochondrial                    | No Class |
| 1455868_a_at | Tubgcp2 | tubulin, gamma complex associated protein 2                        | No Class |
| 1417144_at   | Tubg1   | tubulin, gamma 1                                                   | No Class |
| 1416256_a_at | Tubb5   | tubulin, beta 5                                                    | No Class |
| 1439416_x_at | Tubb2c  | tubulin, beta 2C                                                   | No Class |
| 1452679_at   | Tubb2b  | tubulin, beta 2B                                                   | No Class |
| 1448296_x_at | Tuba3a  | tubulin, alpha 3A                                                  | No Class |
| 1429684_at   | Ttpal   | tocopherol (alpha) transfer protein-like                           | No Class |
| 1429683_at   | Ttpal   | tocopherol (alpha) transfer protein-like                           | No Class |
| 1440829_x_at | Ttl11   | tubulin tyrosine ligase-like family, member 11                     | No Class |
| 1443193_at   | Ttl11   | tubulin tyrosine ligase-like 1                                     | No Class |
| 1436833_x_at | Ttl11   | tubulin tyrosine ligase-like 1                                     | No Class |
| 1426427_at   | Ttl11   | tubulin tyrosine ligase-like 1                                     | No Class |
| 1427112_at   | Ttl     | tubulin tyrosine ligase                                            | No Class |
| 1428522_at   | Ttf2    | transcription termination factor, RNA polymerase II                | No Class |
| 1440044_at   | Ttf1    | transcription termination factor, RNA polymerase I                 | No Class |
| 1443948_at   | Ttc9c   | tetratricopeptide repeat domain 9C                                 | No Class |
| 1432245_s_at | Ttc9c   | tetratricopeptide repeat domain 9C                                 | No Class |
| 1424410_at   | Ttc8    | tetratricopeptide repeat domain 8                                  | No Class |
| 1418696_at   | Ttc36   | tetratricopeptide repeat domain 36                                 | No Class |
| 1416484_at   | Ttc3    | tetratricopeptide repeat domain 3                                  | No Class |
| 1449520_at   | Ttc28   | tetratricopeptide repeat domain 28                                 | No Class |
| 1419584_at   | Ttc28   | tetratricopeptide repeat domain 28                                 | No Class |
| 1452665_at   | Ttc27   | tetratricopeptide repeat domain 27                                 | No Class |
| 1460448_s_at | Ttc14   | tetratricopeptide repeat domain 14                                 | No Class |
| 1456430_at   | Ttc14   | tetratricopeptide repeat domain 14                                 | No Class |
| 1438051_at   | Ttc14   | tetratricopeptide repeat domain 14                                 | No Class |
| 1436581_at   | Ttc14   | tetratricopeptide repeat domain 14                                 | No Class |
| 1432130_a_at | Ttc14   | tetratricopeptide repeat domain 14                                 | No Class |
| 1428846_at   | Ttc14   | tetratricopeptide repeat domain 14                                 | No Class |
| 1438631_x_at | Ttc13   | tetratricopeptide repeat domain 13                                 | No Class |
| 1437709_x_at | Ttc13   | tetratricopeptide repeat domain 13                                 | No Class |
| 1448537_at   | Ttc1    | tetratricopeptide repeat domain 1                                  | No Class |
| 1416994_at   | Ttc1    | tetratricopeptide repeat domain 1                                  | No Class |
| 1456169_at   | Tstd1   | thiosulfate sulfurtransferase (rhodanese)-like domain containing 1 | No Class |
| 1418557_s_at | Tssk3   | testis-specific serine kinase 3                                    | No Class |
| 1441877_x_at | Tssc1   | tumor suppressing subtransferable candidate 1                      | No Class |
| 1455643_s_at | Tsr1    | TSR1, 20S rRNA accumulation, homolog (yeast)                       | No Class |
| 1447788_s_at | Tspyl3  | TSPY-like 3                                                        | No Class |
| 1433826_at   | Tspyl3  | TSPY-like 3                                                        | No Class |
| 1428197_at   | Tspan9  | tetraspanin 9                                                      | No Class |
| 1455709_at   | Tspan8  | Tetraspanin 8                                                      | No Class |
| 1420019_at   | Tspan8  | Tetraspanin 8                                                      | No Class |
| 1448501_at   | Tspan6  | tetraspanin 6                                                      | No Class |
| 1416872_at   | Tspan6  | tetraspanin 6                                                      | No Class |
| 1430029_a_at | Tspan31 | tetraspanin 31                                                     | No Class |
| 1416556_at   | Tspan31 | tetraspanin 31                                                     | No Class |
| 1455642_a_at | Tspan17 | tetraspanin 17                                                     | No Class |
| 1424334_at   | Tspan17 | tetraspanin 17                                                     | No Class |
| 1416908_s_at | Tsn     | translin                                                           | No Class |
| 1416907_at   | Tsn     | translin                                                           | No Class |
| 1450004_at   | Tslp    | thymic stromal lymphopoietin                                       | No Class |



|              |          |                                                                    |          |
|--------------|----------|--------------------------------------------------------------------|----------|
| 1434576_at   | Tsga14   | testis specific gene A14                                           | No Class |
| 1419686_at   | Tsga14   | testis specific gene A14                                           | No Class |
| 1449933_a_at | Tsen15   | tRNA splicing endonuclease 15 homolog (S. cerevisiae)              | No Class |
| 1456132_x_at | Tsc22d1  | TSC22 domain family, member 1                                      | No Class |
| 1454971_x_at | Tsc22d1  | TSC22 domain family, member 1                                      | No Class |
| 1454758_a_at | Tsc22d1  | TSC22 domain family, member 1                                      | No Class |
| 1433899_x_at | Tsc22d1  | TSC22 domain family, member 1                                      | No Class |
| 1425742_a_at | Tsc22d1  | TSC22 domain family, member 1                                      | No Class |
| 1452105_a_at | Tsc2     | tuberous sclerosis 2                                               | No Class |
| 1424611_x_at | Trub2    | TruB pseudouridine (psi) synthase homolog 2 (E. coli)              | No Class |
| 1424610_at   | Trub2    | TruB pseudouridine (psi) synthase homolog 2 (E. coli)              | No Class |
| 1417545_at   | Trpv4    | transient receptor potential cation channel, subfamily V, member 4 | No Class |
| 1416935_at   | Trpv2    | transient receptor potential cation channel, subfamily V, member 2 | No Class |
| 1457445_at   | Trps1    | trichorhinophalangeal syndrome 1 (human)                           | No Class |
| 1438877_at   | Trpm6    | transient receptor potential cation channel, subfamily M, member 6 | No Class |
| 1420783_at   | Trpd52l3 | tumor protein D52-like 3                                           | No Class |
| 1426956_a_at | Trp53bp1 | transformation related protein 53 binding protein 1                | No Class |
| 1436535_at   | Trove2   | TROVE domain family, member 2                                      | No Class |
| 1426016_a_at | Tro      | trophinin                                                          | No Class |
| 1453008_at   | Trnp1    | TMF1-regulated nuclear protein 1                                   | No Class |
| 1433962_at   | Trmt61a  | tRNA methyltransferase 61 homolog A (S. cerevisiae)                | No Class |
| 1453995_a_at | Trmt2a   | TRM2 tRNA methyltransferase 2 homolog A (S. cerevisiae)            | No Class |
| 1460375_at   | Trmt112  | tRNA methyltransferase 11-2 homolog (S. cerevisiae)                | No Class |
| 1428551_at   | Trmt11   | tRNA methyltransferase 11 homolog (S. cerevisiae)                  | No Class |
| 1451249_at   | Trmt1    | TRM1 tRNA methyltransferase 1 homolog (S. cerevisiae)              | No Class |
| 1443153_at   | Trip11   | Thyroid hormone receptor interactor 11                             | No Class |
| 1445733_at   | Trim71   | Tripartite motif-containing 71                                     | No Class |
| 1425648_at   | Trim60   | tripartite motif-containing 60                                     | No Class |
| 1431430_s_at | Trim59   | tripartite motif-containing 59                                     | No Class |
| 1442693_at   | Trim5    | tripartite motif-containing 5                                      | No Class |
| 1431932_s_at | Trim44   | tripartite motif-containing 44                                     | No Class |
| 1421869_at   | Trim44   | tripartite motif-containing 44                                     | No Class |
| 1457253_at   | Trim40   | tripartite motif-containing 40                                     | No Class |
| 1426092_a_at | Trim34   | tripartite motif-containing 34                                     | No Class |
| 1421550_a_at | Trim34   | tripartite motif-containing 34                                     | No Class |
| 1455189_at   | Trim33   | tripartite motif-containing 33                                     | No Class |
| 1456375_x_at | Trim27   | tripartite motif-containing 27                                     | No Class |
| 1438376_s_at | Trim27   | tripartite motif-containing 27                                     | No Class |
| 1441487_at   | Trim2    | tripartite motif-containing 2                                      | No Class |
| 1417027_at   | Trim2    | tripartite motif-containing 2                                      | No Class |
| 1459994_x_at | Trfr2    | transferrin receptor 2                                             | No Class |
| 1425381_a_at | Trfr2    | transferrin receptor 2                                             | No Class |
| 1460014_at   | Trem14   | triggering receptor expressed on myeloid cells-like 4              | No Class |
| 1460271_at   | Trem3    | triggering receptor expressed on myeloid cells 3                   | No Class |
| 1417034_at   | Trappc6a | trafficking protein particle complex 6A                            | No Class |
| 1451268_at   | Tram1l1  | translocation associated membrane protein 1-like 1                 | No Class |
| 1428327_at   | Trak1    | trafficking protein, kinesin binding 1                             | No Class |
| 1428346_at   | Traf1    | TRAF type zinc finger domain containing 1                          | No Class |
| 1446940_at   | Traf6    | TNF receptor-associated factor 6                                   | No Class |
| 1448861_at   | Traf5    | TNF receptor-associated factor 5                                   | No Class |
| 1429117_at   | Tradd    | TNFRSF1A-associated via death domain                               | No Class |
| 1425161_a_at | Trabd    | TraB domain containing                                             | No Class |
| 1441466_at   | Tra2b    | transformer 2 beta homolog (Drosophila)                            | No Class |
| 1427432_a_at | Tra2b    | transformer 2 beta homolog (Drosophila)                            | No Class |
| 1456651_a_at | Tpr      | translocated promoter region                                       | No Class |
| 1430576_at   | Tpp2     | tripeptidyl peptidase II                                           | No Class |
| 1430889_a_at | Tpmt     | thiopurine methyltransferase                                       | No Class |

|              |           |                                                                          |          |
|--------------|-----------|--------------------------------------------------------------------------|----------|
| 1427260_a_at | Tpm3      | tropomyosin 3, gamma                                                     | No Class |
| 1419739_at   | Tpm2      | tropomyosin 2, beta                                                      | No Class |
| 1457662_x_at | Tpk1      | thiamine pyrophosphokinase                                               | No Class |
| 1452927_x_at | Tpi1      | triosephosphate isomerase 1                                              | No Class |
| 1435659_a_at | Tpi1      | triosephosphate isomerase 1                                              | No Class |
| 1415918_a_at | Tpi1      | triosephosphate isomerase 1                                              | No Class |
| 1436828_a_at | Tpd52l2   | tumor protein D52-like 2                                                 | No Class |
| 1417106_at   | Tpd52l2   | tumor protein D52-like 2                                                 | No Class |
| 1423783_at   | Tor2a     | torsin family 2, member A                                                | No Class |
| 1417819_at   | Tor1b     | torsin family 1, member B                                                | No Class |
| 1448958_at   | Tor1aip2  | torsin A interacting protein 2                                           | No Class |
| 1418116_at   | Tor1aip2  | torsin A interacting protein 2                                           | No Class |
| 1418115_s_at | Tor1aip2  | torsin A interacting protein 2                                           | No Class |
| 1448838_at   | Topors    | topoisomerase I binding, arginine/serine-rich                            | No Class |
| 1438387_x_at | Top3b     | topoisomerase (DNA) III beta                                             | No Class |
| 1448458_at   | Top2b     | topoisomerase (DNA) II beta                                              | No Class |
| 1416732_at   | Top2b     | topoisomerase (DNA) II beta                                              | No Class |
| 1460370_at   | Top1mt    | DNA topoisomerase 1, mitochondrial                                       | No Class |
| 1415733_a_at | Tommm5    | translocase of outer mitochondrial membrane 5 homolog (yeast)            | No Class |
| 1426118_a_at | Tommm40   | translocase of outer mitochondrial membrane 40 homolog (yeast)           | No Class |
| 1455357_x_at | Tommm20   | translocase of outer mitochondrial membrane 20 homolog (yeast)           | No Class |
| 1435534_a_at | Tommm20   | translocase of outer mitochondrial membrane 20 homolog (yeast)           | No Class |
| 1423081_a_at | Tommm20   | translocase of outer mitochondrial membrane 20 homolog (yeast)           | No Class |
| 1451795_at   | Tom1l2    | target of myb1-like 2 (chicken)                                          | No Class |
| 1425659_at   | Tom1l2    | target of myb1-like 2 (chicken)                                          | No Class |
| 1435055_a_at | Tom1      | target of myb1 homolog (chicken)                                         | No Class |
| 1431188_a_at | Tom1      | target of myb1 homolog (chicken)                                         | No Class |
| 1426527_at   | Toe1      | target of EGR1, member 1 (nuclear)                                       | No Class |
| 1417310_at   | Tob2      | transducer of ERBB2, 2                                                   | No Class |
| 1440844_at   | Tob1      | transducer of ErbB-2.1                                                   | No Class |
| 1450798_at   | Tnxb      | tenascin XB                                                              | No Class |
| 1449405_at   | Tns1      | tensin 1                                                                 | No Class |
| 1428650_at   | Tns1      | tensin 1                                                                 | No Class |
| 1419283_s_at | Tns1      | tensin 1                                                                 | No Class |
| 1439246_x_at | Tnrc6a    | trinucleotide repeat containing 6a                                       | No Class |
| 1439244_a_at | Tnrc6a    | trinucleotide repeat containing 6a                                       | No Class |
| 1434898_at   | Tnrc6a    | trinucleotide repeat containing 6a                                       | No Class |
| 1437283_at   | Tnpo2     | transportin 2 (importin 3, karyopherin beta 2b)                          | No Class |
| 1425593_at   | Tnpo2     | transportin 2 (importin 3, karyopherin beta 2b)                          | No Class |
| 1450118_a_at | Tnnt3     | troponin T3, skeletal, fast                                              | No Class |
| 1417464_at   | Tnnc2     | troponin C2, fast                                                        | No Class |
| 1452772_at   | Tnks2     | tankyrase, TRF1-interacting ankyrin-related ADP-ribose polymerase 2      | No Class |
| 1459910_at   | Tnks      | tankyrase, TRF1-interacting ankyrin-related ADP-ribose polymerase        | No Class |
| 1458403_at   | Tnik      | TRAF2 and NCK interacting kinase                                         | No Class |
| 1429870_at   | Tnik      | TRAF2 and NCK interacting kinase                                         | No Class |
| 1422231_a_at | Tnfrsf25  | tumor necrosis factor receptor superfamily, member 25                    | No Class |
| 1418572_x_at | Tnfrsf12a | tumor necrosis factor receptor superfamily, member 12a                   | No Class |
| 1418571_at   | Tnfrsf12a | tumor necrosis factor receptor superfamily, member 12a                   | No Class |
| 1449033_at   | Tnfrsf11b | tumor necrosis factor receptor superfamily, member 11b (osteoprotegerin) | No Class |
| 1418309_at   | Tnfrsf11b | tumor necrosis factor receptor superfamily, member 11b (osteoprotegerin) | No Class |
| 1421296_at   | Tnfrsf10b | tumor necrosis factor receptor superfamily, member 10b                   | No Class |
| 1452948_at   | Tnfaip8l2 | tumor necrosis factor, alpha-induced protein 8-like 2                    | No Class |
| 1418424_at   | Tnfaip6   | tumor necrosis factor alpha induced protein 6                            | No Class |
| 1433699_at   | Tnfaip3   | tumor necrosis factor, alpha-induced protein 3                           | No Class |
| 1448863_a_at | Tnfaip1   | tumor necrosis factor, alpha-induced protein 1 (endothelial)             | No Class |
| 1416342_at   | Tnc       | tenascin C                                                               | No Class |
| 1430995_at   | Tmx3      | thioredoxin-related transmembrane protein 3                              | No Class |

|              |          |                                                        |          |
|--------------|----------|--------------------------------------------------------|----------|
| 1440894_at   | Tmtc3    | transmembrane and tetra-tryptophan repeat containing 3 | No Class |
| 1436826_at   | Tmtc3    | transmembrane and tetra-tryptophan repeat containing 3 | No Class |
| 1417219_s_at | Tmsb10   | thymosin, beta 10                                      | No Class |
| 1418959_at   | Tmprss5  | transmembrane protease, serine 5 (spinesin)            | No Class |
| 1421714_at   | Tmprss3  | transmembrane protease, serine 3                       | No Class |
| 1452036_a_at | Tmpo     | thymopoietin                                           | No Class |
| 1428976_at   | Tmpo     | thymopoietin                                           | No Class |
| 1426349_s_at | Tmpo     | thymopoietin                                           | No Class |
| 1421237_at   | Tmpo     | thymopoietin                                           | No Class |
| 1424133_at   | Tmem98   | transmembrane protein 98                               | No Class |
| 1418124_at   | Tmem85   | transmembrane protein 85                               | No Class |
| 1436212_at   | Tmem71   | transmembrane protein 71                               | No Class |
| 1454709_at   | Tmem64   | transmembrane protein 64                               | No Class |
| 1434307_at   | Tmem64   | transmembrane protein 64                               | No Class |
| 1433735_a_at | Tmem64   | transmembrane protein 64                               | No Class |
| 1424042_at   | Tmem5    | transmembrane protein 5                                | No Class |
| 1460353_at   | Tmem48   | transmembrane protein 48                               | No Class |
| 1449885_at   | Tmem47   | transmembrane protein 47                               | No Class |
| 1420514_at   | Tmem47   | transmembrane protein 47                               | No Class |
| 1438790_x_at | Tmem41b  | transmembrane protein 41B                              | No Class |
| 1438117_x_at | Tmem41b  | transmembrane protein 41B                              | No Class |
| 1437402_x_at | Tmem41b  | transmembrane protein 41B                              | No Class |
| 1428587_at   | Tmem41b  | transmembrane protein 41B                              | No Class |
| 1456544_at   | Tmem38b  | transmembrane protein 38B                              | No Class |
| 1449677_s_at | Tmem38b  | transmembrane protein 38B                              | No Class |
| 1424700_at   | Tmem38b  | transmembrane protein 38B                              | No Class |
| 1424178_at   | Tmem38a  | transmembrane protein 38A                              | No Class |
| 1417611_at   | Tmem37   | transmembrane protein 37                               | No Class |
| 1431105_a_at | Tmem33   | transmembrane protein 33                               | No Class |
| 1428888_at   | Tmem33   | transmembrane protein 33                               | No Class |
| 1448339_at   | Tmem30a  | transmembrane protein 30A                              | No Class |
| 1424806_s_at | Tmem214  | transmembrane protein 214                              | No Class |
| 1454274_at   | Tmem210  | transmembrane protein 210                              | No Class |
| 1452199_at   | Tmem209  | transmembrane protein 209                              | No Class |
| 1426797_at   | Tmem209  | transmembrane protein 209                              | No Class |
| 1448552_s_at | Tmem206  | transmembrane protein 206                              | No Class |
| 1417031_at   | Tmem206  | transmembrane protein 206                              | No Class |
| 1417030_at   | Tmem206  | transmembrane protein 206                              | No Class |
| 1434621_at   | Tmem204  | transmembrane protein 204                              | No Class |
| 1455553_at   | Tmem194b | transmembrane protein 194B                             | No Class |
| 1424477_at   | Tmem184a | transmembrane protein 184a                             | No Class |
| 1431304_a_at | Tmem183a | transmembrane protein 183A                             | No Class |
| 1454423_at   | Tmem180  | transmembrane protein 180                              | No Class |
| 1429175_at   | Tmem178  | transmembrane protein 178                              | No Class |
| 1418004_a_at | Tmem176b | transmembrane protein 176B                             | No Class |
| 1441811_x_at | Tmem176a | transmembrane protein 176A                             | No Class |
| 1425603_at   | Tmem176a | transmembrane protein 176A                             | No Class |
| 1423909_at   | Tmem176a | transmembrane protein 176A                             | No Class |
| 1459997_s_at | Tmem17   | transmembrane protein 17                               | No Class |
| 1454151_at   | Tmem167  | transmembrane protein 167                              | No Class |
| 1433802_at   | Tmem151a | transmembrane protein 151A                             | No Class |
| 1441880_x_at | Tmem149  | transmembrane protein 149                              | No Class |
| 1456583_x_at | Tmem144  | transmembrane protein 144                              | No Class |
| 1446492_at   | Tmem132d | Transmembrane protein 132D                             | No Class |
| 1416845_at   | Tmem132a | transmembrane protein 132A                             | No Class |
| 1433615_at   | Tmem117  | transmembrane protein 117                              | No Class |
| 1432183_at   | Tmem116  | transmembrane protein 116                              | No Class |

|              |          |                                                                        |          |
|--------------|----------|------------------------------------------------------------------------|----------|
| 1416032_at   | Tmem109  | transmembrane protein 109                                              | No Class |
| 1435075_at   | Tmem106b | transmembrane protein 106b                                             | No Class |
| 1435263_at   | Tmem106a | transmembrane protein 106A                                             | No Class |
| 1425025_at   | Tmem106a | transmembrane protein 106A                                             | No Class |
| 1426649_at   | Tmeff1   | transmembrane protein with EGF-like and two follistatin-like domains 1 | No Class |
| 1429187_at   | Tmed7    | transmembrane emp24 protein transport domain containing 7              | No Class |
| 1427314_at   | Tmed7    | transmembrane emp24 protein transport domain containing 7              | No Class |
| 1431789_s_at | Tmed5    | transmembrane emp24 protein transport domain containing 5              | No Class |
| 1455968_x_at | Tmed2    | transmembrane emp24 domain trafficking protein 2                       | No Class |
| 1436452_x_at | Tmed2    | transmembrane emp24 domain trafficking protein 2                       | No Class |
| 1436451_a_at | Tmed2    | transmembrane emp24 domain trafficking protein 2                       | No Class |
| 1420867_at   | Tmed2    | transmembrane emp24 domain trafficking protein 2                       | No Class |
| 1454688_x_at | Tmed10   | transmembrane emp24-like trafficking protein 10 (yeast)                | No Class |
| 1439462_x_at | Tmed10   | transmembrane emp24-like trafficking protein 10 (yeast)                | No Class |
| 1439444_x_at | Tmed10   | transmembrane emp24-like trafficking protein 10 (yeast)                | No Class |
| 1424708_at   | Tmed10   | transmembrane emp24-like trafficking protein 10 (yeast)                | No Class |
| 1454889_x_at | Tmcc3    | transmembrane and coiled coil domains 3                                | No Class |
| 1451794_at   | Tmcc3    | transmembrane and coiled coil domains 3                                | No Class |
| 1435554_at   | Tmcc3    | transmembrane and coiled coil domains 3                                | No Class |
| 1434253_s_at | Tmcc3    | transmembrane and coiled coil domains 3                                | No Class |
| 1434252_at   | Tmcc3    | transmembrane and coiled coil domains 3                                | No Class |
| 1441370_at   | Tmcc1    | Transmembrane and coiled coil domains 1                                | No Class |
| 1437776_at   | Tmcc1    | transmembrane and coiled coil domains 1                                | No Class |
| 1456981_at   | Tmc7     | transmembrane channel-like gene family 7                               | No Class |
| 1439937_at   | Tm9sf1   | Transmembrane 9 superfamily member 1                                   | No Class |
| 1450958_at   | Tm4sf1   | transmembrane 4 superfamily member 1                                   | No Class |
| 1448069_at   | Tm4sf1   | transmembrane 4 superfamily member 1                                   | No Class |
| 1451134_a_at | Tm2d2    | TM2 domain containing 2                                                | No Class |
| 1439454_x_at | Tm2d2    | TM2 domain containing 2                                                | No Class |
| 1439235_x_at | Tm2d2    | TM2 domain containing 2                                                | No Class |
| 1439234_a_at | Tm2d2    | TM2 domain containing 2                                                | No Class |
| 1438181_x_at | Tm2d2    | TM2 domain containing 2                                                | No Class |
| 1433473_x_at | Tm2d2    | TM2 domain containing 2                                                | No Class |
| 1421770_a_at | Tlx2     | T-cell leukemia, homeobox 2                                            | No Class |
| 1450267_at   | Tlr8     | toll-like receptor 8                                                   | No Class |
| 1449640_at   | Tlr7     | toll-like receptor 7                                                   | No Class |
| 1419848_x_at | Tlr7     | toll-like receptor 7                                                   | No Class |
| 1442827_at   | Tlr4     | toll-like receptor 4                                                   | No Class |
| 1418163_at   | Tlr4     | toll-like receptor 4                                                   | No Class |
| 1418162_at   | Tlr4     | toll-like receptor 4                                                   | No Class |
| 1431827_a_at | Tlk2     | tousled-like kinase 2 (Arabidopsis)                                    | No Class |
| 1450985_a_at | Tjp2     | tight junction protein 2                                               | No Class |
| 1434600_at   | Tjp2     | tight junction protein 2                                               | No Class |
| 1434599_a_at | Tjp2     | tight junction protein 2                                               | No Class |
| 1426691_at   | Tjap1    | tight junction associated protein 1                                    | No Class |
| 1452161_at   | Tiparp   | TCDD-inducible poly(ADP-ribose) polymerase                             | No Class |
| 1452160_at   | Tiparp   | TCDD-inducible poly(ADP-ribose) polymerase                             | No Class |
| 1426721_s_at | Tiparp   | TCDD-inducible poly(ADP-ribose) polymerase                             | No Class |
| 1437166_at   | Tinf2    | Terf1 (TRF1)-interacting nuclear factor 2                              | No Class |
| 1460287_at   | Timp2    | tissue inhibitor of metalloproteinase 2                                | No Class |
| 1449886_a_at | Timm9    | translocase of inner mitochondrial membrane 9 homolog (yeast)          | No Class |
| 1416346_at   | Timm8a1  | translocase of inner mitochondrial membrane 8 homolog a1 (yeast)       | No Class |
| 1416814_at   | Tia1     | cytotoxic granule-associated RNA binding protein 1                     | No Class |
| 1416813_at   | Tia1     | cytotoxic granule-associated RNA binding protein 1                     | No Class |
| 1416812_at   | Tia1     | cytotoxic granule-associated RNA binding protein 1                     | No Class |
| 1438480_a_at | Thyn1    | thymocyte nuclear protein 1                                            | No Class |
| 1454061_at   | Thumpd3  | THUMP domain containing 3                                              | No Class |

|                        |                     |                                                                         |          |
|------------------------|---------------------|-------------------------------------------------------------------------|----------|
| 1436007_a_at           | Thumpd1             | THUMP domain containing 1                                               | No Class |
| 1449621_s_at           | Thsd1               | thrombospondin, type I, domain 1                                        | No Class |
| 1418205_at             | Thsd1               | thrombospondin, type I, domain 1                                        | No Class |
| 1448907_at             | Thop1               | thimet oligopeptidase 1                                                 | No Class |
| 1444004_at             | Thoc2               | THO complex 2                                                           | No Class |
| 1438736_at             | Thoc2               | THO complex 2                                                           | No Class |
| 1431044_at             | Thoc1               | THO complex 1                                                           | No Class |
| 1424641_a_at           | Thoc1               | THO complex 1                                                           | No Class |
| 1431211_s_at           | Them5               | thioesterase superfamily member 5                                       | No Class |
| 1416623_at             | Thbs3               | thrombospondin 3                                                        | No Class |
| 1448529_at             | Thbd                | thrombomodulin                                                          | No Class |
| 1447754_x_at           | Thap4               | THAP domain containing 4                                                | No Class |
| 1423308_at             | Tgoln1              | trans-golgi network protein                                             | No Class |
| 1455900_x_at           | Tgm2                | transglutaminase 2, C polypeptide                                       | No Class |
| 1437277_x_at           | Tgm2                | transglutaminase 2, C polypeptide                                       | No Class |
| 1433428_x_at           | Tgm2                | transglutaminase 2, C polypeptide                                       | No Class |
| 1433795_at             | Tgfb3               | transforming growth factor, beta receptor III                           | No Class |
| 1456250_x_at           | Tgfb1               | transforming growth factor, beta induced                                | No Class |
| 1448123_s_at           | Tgfb1               | transforming growth factor, beta induced                                | No Class |
| 1437463_x_at           | Tgfb1               | transforming growth factor, beta induced                                | No Class |
| 1415871_at             | Tgfb1               | transforming growth factor, beta induced                                | No Class |
| 1450922_a_at           | Tgfb2               | transforming growth factor, beta 2                                      | No Class |
| 1438303_at             | Tgfb2               | transforming growth factor, beta 2                                      | No Class |
| 1423250_a_at           | Tgfb2               | transforming growth factor, beta 2                                      | No Class |
| 1445360_at             | Tgfb1               | Transforming growth factor, beta 1                                      | No Class |
| 1420653_at             | Tgfb1               | transforming growth factor, beta 1                                      | No Class |
| AFFX-TransRecMur/,Tfrc |                     | transferrin receptor                                                    | No Class |
| 1422967_a_at           | Tfrc                | transferrin receptor                                                    | No Class |
| 1422966_a_at           | Tfrc                | transferrin receptor                                                    | No Class |
| 1418064_at             | Tfpt                | TCF3 (E2A) fusion partner                                               | No Class |
| 1415887_at             | Tfg                 | Trk-fused gene                                                          | No Class |
| 1448156_at             | Tff1                | trefoil factor 1                                                        | No Class |
| 1449749_s_at           | Tfb1m               | transcription factor B1, mitochondrial                                  | No Class |
| 1429548_at             | Tex22               | testis expressed gene 22                                                | No Class |
| 1421183_at             | Tex12               | testis expressed gene 12                                                | No Class |
| 1434317_s_at           | Tex10               | testis expressed gene 10                                                | No Class |
| 1455651_at             | Terf2               | telomeric repeat binding factor 2                                       | No Class |
| 1418196_at             | Tep1                | telomerase associated protein 1                                         | No Class |
| 1429355_at             | Tekt5               | tektin 5                                                                | No Class |
| 1418788_at             | Tek                 | endothelial-specific receptor tyrosine kinase                           | No Class |
| 1426337_a_at           | Tead4               | TEA domain family member 4                                              | No Class |
| 1420593_a_at           | Tead3               | TEA domain family member 3                                              | No Class |
| 1448519_at             | Tead2               | TEA domain family member 2                                              | No Class |
| 1426492_at             | Tdp1                | tyrosyl-DNA phosphodiesterase 1                                         | No Class |
| 1451852_at             | Tcstv3              | 2-cell-stage, variable group, member 3                                  | No Class |
| 1450521_a_at           | Tcrg-V4             | T-cell receptor gamma, variable 4                                       | No Class |
| 1422189_x_at           | Tcrg-V4             | T-cell receptor gamma, variable 4                                       | No Class |
| 1422188_s_at           | Tcrg-V2 /// Tcrg-V3 | T-cell receptor gamma, variable 2 /// T-cell receptor gamma, variable 3 | No Class |
| 1427608_a_at           | Tcrg-V1             | T-cell receptor gamma, variable 1                                       | No Class |
| 1420730_a_at           | Tcp11               | t-complex protein 11                                                    | No Class |
| 1448122_at             | Tcp1                | t-complex protein 1                                                     | No Class |
| 1424643_at             | Tcof1               | Treacher Collins Franceschetti syndrome 1, homolog                      | No Class |
| 1423601_s_at           | Tcof1               | Treacher Collins Franceschetti syndrome 1, homolog                      | No Class |
| 1423600_a_at           | Tcof1               | Treacher Collins Franceschetti syndrome 1, homolog                      | No Class |
| 1457825_x_at           | Tcn2                | transcobalamin 2                                                        | No Class |
| 1448200_at             | Tcn2                | transcobalamin 2                                                        | No Class |
| 1447842_x_at           | Tcn2                | transcobalamin 2                                                        | No Class |

|              |          |                                                                                  |          |
|--------------|----------|----------------------------------------------------------------------------------|----------|
| 1447800_x_at | Tcn2     | transcobalamin 2                                                                 | No Class |
| 1441850_x_at | Tcn2     | transcobalamin 2                                                                 | No Class |
| 1456515_s_at | Tcf15    | transcription factor-like 5 (basic helix-loop-helix)                             | No Class |
| 1426048_s_at | Tcfap2a  | transcription factor AP-2, alpha                                                 | No Class |
| 1421996_at   | Tcfap2a  | transcription factor AP-2, alpha                                                 | No Class |
| 1429427_s_at | Tcf7l2   | transcription factor 7-like 2, T-cell specific, HMG-box                          | No Class |
| 1425229_a_at | Tcf7l2   | transcription factor 7-like 2, T-cell specific, HMG-box                          | No Class |
| 1434149_at   | Tcf4     | transcription factor 4                                                           | No Class |
| 1434148_at   | Tcf4     | transcription factor 4                                                           | No Class |
| 1424089_a_at | Tcf4     | transcription factor 4                                                           | No Class |
| 1416724_x_at | Tcf4     | transcription factor 4                                                           | No Class |
| 1416723_at   | Tcf4     | transcription factor 4                                                           | No Class |
| 1452542_x_at | Tcf3     | transcription factor 3                                                           | No Class |
| 1427764_a_at | Tcf3     | transcription factor 3                                                           | No Class |
| 1426297_at   | Tcf3     | transcription factor 3                                                           | No Class |
| 1424053_a_at | Tcf25    | transcription factor 25 (basic helix-loop-helix)                                 | No Class |
| 1421910_at   | Tcf20    | transcription factor 20                                                          | No Class |
| 1439619_at   | Tcf12    | transcription factor 12                                                          | No Class |
| 1439209_at   | Tcf12    | Transcription factor 12                                                          | No Class |
| 1421908_a_at | Tcf12    | transcription factor 12                                                          | No Class |
| 1428263_a_at | Tceb2    | transcription elongation factor B (SIII), polypeptide 2                          | No Class |
| 1435236_at   | Tceanc   | transcription elongation factor A (SII) N-terminal and central domain containing | No Class |
| 1424634_at   | Tceal1   | transcription elongation factor A (SII)-like 1                                   | No Class |
| 1425695_at   | Tbx5     | T-box 5                                                                          | No Class |
| 1448029_at   | Tbx3     | T-box 3                                                                          | No Class |
| 1434643_at   | Tbl1x    | transducin (beta)-like 1 X-linked                                                | No Class |
| 1460315_s_at | Tbk1     | TANK-binding kinase 1                                                            | No Class |
| 1422469_at   | Tbk1     | TANK-binding kinase 1                                                            | No Class |
| 1451423_at   | Tbcc     | tubulin-specific chaperone C                                                     | No Class |
| 1424644_at   | Tbcc     | tubulin-specific chaperone C                                                     | No Class |
| 1430808_at   | Tbc1d5   | TBC1 domain family, member 5                                                     | No Class |
| 1426899_at   | Tbc1d23  | TBC1 domain family, member 23                                                    | No Class |
| 1451107_at   | Tbc1d22a | TBC1 domain family, member 22a                                                   | No Class |
| 1424918_at   | Tbc1d19  | TBC1 domain family, member 19                                                    | No Class |
| 1425957_x_at | Tbata    | thymus, brain and testes associated                                              | No Class |
| 1424169_at   | Tax1bp3  | Tax1 (human T-cell leukemia virus type I) binding protein 3                      | No Class |
| 1451998_at   | Tasp1    | taspase, threonine aspartase 1                                                   | No Class |
| 1460323_at   | Tars     | threonyl-tRNA synthetase                                                         | No Class |
| 1428467_at   | Tardbp   | TAR DNA binding protein                                                          | No Class |
| 1423723_s_at | Tardbp   | TAR DNA binding protein                                                          | No Class |
| 1451544_at   | Tapbp1   | TAP binding protein-like                                                         | No Class |
| 1450378_at   | Tapbp    | TAP binding protein                                                              | No Class |
| 1455733_at   | Taok3    | TAO kinase 3                                                                     | No Class |
| 1435964_a_at | Taok3    | TAO kinase 3                                                                     | No Class |
| 1456975_at   | Taok1    | TAO kinase 1                                                                     | No Class |
| 1440187_at   | Taf3     | TAF3 RNA polymerase II, TATA box binding protein (TBP)-associated factor         | No Class |
| 1452987_at   | Taf1d    | TATA box binding protein (Tbp)-associated factor, RNA polymerase I, D            | No Class |
| 1452635_x_at | Taf1d    | TATA box binding protein (Tbp)-associated factor, RNA polymerase I, D            | No Class |
| 1442289_at   | Taf1d    | TATA box binding protein (Tbp)-associated factor, RNA polymerase I, D            | No Class |
| 1423398_at   | Taf12    | TAF12 RNA polymerase II, TATA box binding protein (TBP)-associated factor        | No Class |
| 1451995_at   | Taf11    | TAF11 RNA polymerase II, TATA box binding protein (TBP)-associated factor        | No Class |
| 1452310_at   | Tada2a   | transcriptional adaptor 2A                                                       | No Class |
| 1437029_at   | Tacr3    | tachykinin receptor 3                                                            | No Class |
| 1455834_x_at | Tacc3    | transforming, acidic coiled-coil containing protein 3                            | No Class |
| 1436872_at   | Tacc3    | transforming, acidic coiled-coil containing protein 3                            | No Class |
| 1431883_at   | Tac1     | tachykinin 1                                                                     | No Class |
| 1416783_at   | Tac1     | tachykinin 1                                                                     | No Class |

|              |          |                                                                                   |          |
|--------------|----------|-----------------------------------------------------------------------------------|----------|
| 1443609_s_at | Syvn1    | synovial apoptosis inhibitor 1, synoviolin                                        | No Class |
| 1428070_at   | Syvn1    | synovial apoptosis inhibitor 1, synoviolin                                        | No Class |
| 1441927_at   | Syt7     | synaptotagmin VII                                                                 | No Class |
| 1439633_at   | Syt7     | synaptotagmin VII                                                                 | No Class |
| 1422955_at   | Syt17    | synaptotagmin XVII                                                                | No Class |
| 1457695_at   | Synrg    | synergins, gamma                                                                  | No Class |
| 1428015_at   | Synj2bp  | synaptojanin 2 binding protein                                                    | No Class |
| 1455493_at   | Syne1    | synaptic nuclear envelope 1                                                       | No Class |
| 1460230_at   | Syn2     | synapsin II                                                                       | No Class |
| 1449030_at   | Syn2     | synapsin II                                                                       | No Class |
| 1435511_at   | Syn2     | synapsin II                                                                       | No Class |
| 1428460_at   | Syn2     | synapsin II                                                                       | No Class |
| 1418262_at   | Sykb     | spleen tyrosine kinase                                                            | No Class |
| 1418261_at   | Sykb     | spleen tyrosine kinase                                                            | No Class |
| 1429270_a_at | Syce2    | synaptonemal complex central element protein 2                                    | No Class |
| 1452364_at   | Suz12    | suppressor of zeste 12 homolog (Drosophila)                                       | No Class |
| 1427253_s_at | Suz12    | suppressor of zeste 12 homolog (Drosophila)                                       | No Class |
| 1420021_s_at | Suz12    | suppressor of zeste 12 homolog (Drosophila)                                       | No Class |
| 1425740_at   | Suv420h1 | suppressor of variegation 4-20 homolog 1 (Drosophila)                             | No Class |
| 1433996_at   | Suv39h2  | suppressor of variegation 3-9 homolog 2 (Drosophila)                              | No Class |
| 1422979_at   | Suv39h2  | suppressor of variegation 3-9 homolog 2 (Drosophila)                              | No Class |
| 1448255_a_at | Surf4    | surfeit gene 4                                                                    | No Class |
| 1436797_a_at | Surf4    | surfeit gene 4                                                                    | No Class |
| 1416213_x_at | Surf4    | surfeit gene 4                                                                    | No Class |
| 1460557_at   | Supv3l1  | suppressor of var1, 3-like 1 (S. cerevisiae)                                      | No Class |
| 1451339_at   | Suox     | sulfite oxidase                                                                   | No Class |
| 1426667_a_at | Sun1     | Sad1 and UNC84 domain containing 1                                                | No Class |
| 1439372_at   | Sumo3    | SMT3 suppressor of mif two 3 homolog 3 (yeast)                                    | No Class |
| 1429713_at   | Sumf2    | sulfatase modifying factor 2                                                      | No Class |
| 1439759_x_at | Sult6b1  | sulfotransferase family, cytosolic, 6B, member 1                                  | No Class |
| 1447056_at   | Sucla2   | Succinate-Coenzyme A ligase, ADP-forming, beta subunit                            | No Class |
| 1422299_a_at | Styx1l   | serine/threonine/tyrosine interacting-like 1                                      | No Class |
| 1455706_at   | Stxbp4   | syntaxin binding protein 4                                                        | No Class |
| 1451063_at   | Stxbp4   | syntaxin binding protein 4                                                        | No Class |
| 1448341_a_at | Stxbp2   | syntaxin binding protein 2                                                        | No Class |
| 1437048_x_at | Stxbp2   | syntaxin binding protein 2                                                        | No Class |
| 1416449_x_at | Stxbp2   | syntaxin binding protein 2                                                        | No Class |
| 1450844_at   | Stx6     | syntaxin 6                                                                        | No Class |
| 1431646_a_at | Stx6     | syntaxin 6                                                                        | No Class |
| 1453819_x_at | Stx18    | syntaxin 18                                                                       | No Class |
| 1431295_a_at | Stx18    | syntaxin 18                                                                       | No Class |
| 1429288_x_at | Stx18    | syntaxin 18                                                                       | No Class |
| 1425011_x_at | Stx18    | syntaxin 18                                                                       | No Class |
| 1416580_a_at | Stub1    | STIP1 homology and U-Box containing protein 1                                     | No Class |
| 1450841_at   | Stt3a    | STT3, subunit of the oligosaccharyltransferase complex, homolog A (S. cerevisiae) | No Class |
| 1423536_at   | Strn3    | striatin, calmodulin binding protein 3                                            | No Class |
| 1423535_at   | Strn3    | striatin, calmodulin binding protein 3                                            | No Class |
| 1416566_at   | Strap    | serine/threonine kinase receptor associated protein                               | No Class |
| 1457778_at   | Stox2    | storkhead box 2                                                                   | No Class |
| 1447624_s_at | Stox2    | storkhead box 2                                                                   | No Class |
| 1441953_at   | Stox2    | storkhead box 2                                                                   | No Class |
| 1436166_at   | Stox2    | storkhead box 2                                                                   | No Class |
| 1429401_at   | Stox2    | storkhead box 2                                                                   | No Class |
| 1448774_at   | Stoml2   | stomatin (Epb7.2)-like 2                                                          | No Class |
| 1423281_at   | Stmn2    | stathmin-like 2                                                                   | No Class |
| 1436015_s_at | Stk4     | serine/threonine kinase 4                                                         | No Class |
| 1434159_at   | Stk4     | serine/threonine kinase 4                                                         | No Class |

|              |            |                                                                                                             |          |
|--------------|------------|-------------------------------------------------------------------------------------------------------------|----------|
| 1421107_at   | Stk4       | serine/threonine kinase 4                                                                                   | No Class |
| 1431434_at   | Stk39      | serine/threonine kinase 39, STE20/SPS1 homolog (yeast)                                                      | No Class |
| 1435878_at   | Stk38l     | serine/threonine kinase 38 like                                                                             | No Class |
| 1435877_at   | Stk38l     | serine/threonine kinase 38 like                                                                             | No Class |
| 1439938_at   | Stk38      | serine/threonine kinase 38                                                                                  | No Class |
| 1418513_at   | Stk3       | serine/threonine kinase 3 (Ste20, yeast homolog)                                                            | No Class |
| 1416770_at   | Stk25      | serine/threonine kinase 25 (yeast)                                                                          | No Class |
| 1450997_at   | Stk17b     | serine/threonine kinase 17b (apoptosis-inducing)                                                            | No Class |
| 1423452_at   | Stk17b     | serine/threonine kinase 17b (apoptosis-inducing)                                                            | No Class |
| 1417751_at   | Stk10      | serine/threonine kinase 10                                                                                  | No Class |
| 1449484_at   | Stc2       | stanniocalcin 2                                                                                             | No Class |
| 1419503_at   | Stc2       | stanniocalcin 2                                                                                             | No Class |
| 1434442_at   | Stbd1      | starch binding domain 1                                                                                     | No Class |
| 1450259_a_at | Stat5a     | signal transducer and activator of transcription 5A                                                         | No Class |
| 1421469_a_at | Stat5a     | signal transducer and activator of transcription 5A                                                         | No Class |
| 1448713_at   | Stat4      | signal transducer and activator of transcription 4                                                          | No Class |
| 1450034_at   | Stat1      | signal transducer and activator of transcription 1                                                          | No Class |
| 1450033_a_at | Stat1      | signal transducer and activator of transcription 1                                                          | No Class |
| 1440481_at   | Stat1      | signal transducer and activator of transcription 1                                                          | No Class |
| 1420915_at   | Stat1      | signal transducer and activator of transcription 1                                                          | No Class |
| 1427072_at   | Stard8     | START domain containing 8                                                                                   | No Class |
| 1455011_at   | Stard4     | StAR-related lipid transfer (START) domain containing 4                                                     | No Class |
| 1429240_at   | Stard4     | StAR-related lipid transfer (START) domain containing 4                                                     | No Class |
| 1431962_a_at | Stampb     | STAM binding protein                                                                                        | No Class |
| 1416317_a_at | Stampb     | STAM binding protein                                                                                        | No Class |
| 1441724_at   | Stag1      | Stromal antigen 1                                                                                           | No Class |
| 1456440_s_at | St8sia6    | ST8 alpha-N-acetyl-neuraminide alpha-2,8-sialyltransferase 6                                                | No Class |
| 1456147_at   | St8sia6    | ST8 alpha-N-acetyl-neuraminide alpha-2,8-sialyltransferase 6                                                | No Class |
| 1438566_at   | St8sia6    | ST8 alpha-N-acetyl-neuraminide alpha-2,8-sialyltransferase 6                                                | No Class |
| 1455695_at   | St8sia1    | ST8 alpha-N-acetyl-neuraminide alpha-2,8-sialyltransferase 1                                                | No Class |
| 1419695_at   | St8sia1    | ST8 alpha-N-acetyl-neuraminide alpha-2,8-sialyltransferase 1                                                | No Class |
| 1419694_at   | St8sia1    | ST8 alpha-N-acetyl-neuraminide alpha-2,8-sialyltransferase 1                                                | No Class |
| 1417616_at   | St6galnac2 | ST6 (alpha-N-acetyl-neuraminyl-2,3-beta-galactosyl-1,3)-N-acetylgalactosaminide alpha-2,6-sialyltransferase | No Class |
| 1443581_at   | St6gal1    | Beta galactoside alpha 2,6 sialyltransferase 1                                                              | No Class |
| 1449079_s_at | St3gal6    | ST3 beta-galactoside alpha-2,3-sialyltransferase 6                                                          | No Class |
| 1449078_at   | St3gal6    | ST3 beta-galactoside alpha-2,3-sialyltransferase 6                                                          | No Class |
| 1450406_a_at | St3gal3    | ST3 beta-galactoside alpha-2,3-sialyltransferase 3                                                          | No Class |
| 1421915_a_at | St3gal3    | ST3 beta-galactoside alpha-2,3-sialyltransferase 3                                                          | No Class |
| 1421892_at   | St3gal2    | ST3 beta-galactoside alpha-2,3-sialyltransferase 2                                                          | No Class |
| 1421891_at   | St3gal2    | ST3 beta-galactoside alpha-2,3-sialyltransferase 2                                                          | No Class |
| 1421890_at   | St3gal2    | ST3 beta-galactoside alpha-2,3-sialyltransferase 2                                                          | No Class |
| 1425674_a_at | Ssu72      | Ssu72 RNA polymerase II CTD phosphatase homolog (yeast)                                                     | No Class |
| 1426790_at   | Ssrp1      | structure specific recognition protein 1                                                                    | No Class |
| 1426789_s_at | Ssrp1      | structure specific recognition protein 1                                                                    | No Class |
| 1426788_a_at | Ssrp1      | structure specific recognition protein 1                                                                    | No Class |
| 1448524_s_at | Ssr4       | signal sequence receptor, delta                                                                             | No Class |
| 1447053_x_at | Ssr3       | signal sequence receptor, gamma                                                                             | No Class |
| 1415700_a_at | Ssr3       | signal sequence receptor, gamma                                                                             | No Class |
| 1456153_at   | Ssh2       | slingshot homolog 2 (Drosophila)                                                                            | No Class |
| 1455078_at   | Ssh2       | slingshot homolog 2 (Drosophila)                                                                            | No Class |
| 1443554_at   | Ssbp3      | Single-stranded DNA binding protein 3                                                                       | No Class |
| 1427965_at   | Ssbp1      | single-stranded DNA binding protein 1                                                                       | No Class |
| 1416423_x_at | Ssb        | Sjogren syndrome antigen B                                                                                  | No Class |
| 1416422_a_at | Ssb        | Sjogren syndrome antigen B                                                                                  | No Class |
| 1447700_x_at | Ss18l1     | synovial sarcoma translocation gene on chromosome 18-like 1                                                 | No Class |
| 1436257_at   | Ss18       | synovial sarcoma translocation, Chromosome 18                                                               | No Class |
| 1451680_at   | Srxn1      | sulfiredoxin 1 homolog (S. cerevisiae)                                                                      | No Class |



|              |                              |                                                                                                         |          |
|--------------|------------------------------|---------------------------------------------------------------------------------------------------------|----------|
| 1426875_s_at | Srxn1                        | sulfiredoxin 1 homolog (S. cerevisiae)                                                                  | No Class |
| 1425351_at   | Srxn1                        | sulfiredoxin 1 homolog (S. cerevisiae)                                                                  | No Class |
| 1437638_at   | Srrm2                        | serine/arginine repetitive matrix 2                                                                     | No Class |
| 1447447_s_at | Srrm1                        | serine/arginine repetitive matrix 1                                                                     | No Class |
| 1442330_at   | Srrm1                        | Serine/arginine repetitive matrix 1                                                                     | No Class |
| 1455045_at   | Srr                          | serine racemase                                                                                         | No Class |
| 1453421_at   | Srr                          | serine racemase                                                                                         | No Class |
| 1450089_a_at | Srprb                        | signal recognition particle receptor, B subunit                                                         | No Class |
| 1425348_a_at | Srprb                        | signal recognition particle receptor, B subunit                                                         | No Class |
| 1431372_at   | SrpK2                        | serine/arginine-rich protein specific kinase 2                                                          | No Class |
| 1428877_at   | Srp72                        | signal recognition particle 72                                                                          | No Class |
| 1425665_a_at | Srp54a /// Srp54b /// Srp54c | signal recognition particle 54A /// signal recognition particle 54B /// signal recognition particle 54C | No Class |
| 1418568_x_at | Srp14                        | signal recognition particle 14                                                                          | No Class |
| 1418567_a_at | Srp14                        | signal recognition particle 14                                                                          | No Class |
| 1453457_at   | Sri                          | sorcin                                                                                                  | No Class |
| 1450878_at   | Sri                          | sorcin                                                                                                  | No Class |
| 1423155_at   | Sri                          | sorcin                                                                                                  | No Class |
| 1424588_at   | Srgap3                       | SLIT-ROBO Rho GTPase activating protein 3                                                               | No Class |
| 1434406_at   | Srgap2                       | SLIT-ROBO Rho GTPase activating protein 2                                                               | No Class |
| 1429884_at   | Srgap2                       | SLIT-ROBO Rho GTPase activating protein 2                                                               | No Class |
| 1427967_at   | Srgap2                       | SLIT-ROBO Rho GTPase activating protein 2                                                               | No Class |
| 1420509_at   | Srfbp1                       | serum response factor binding protein 1                                                                 | No Class |
| 1456691_s_at | Srd5a3                       | steroid 5 alpha-reductase 3                                                                             | No Class |
| 1423574_s_at | Srd5a3                       | steroid 5 alpha-reductase 3                                                                             | No Class |
| 1441653_at   | Srcap                        | Snf2-related CREBBP activator protein                                                                   | No Class |
| 1422963_at   | Sprr2i                       | small proline-rich protein 2i                                                                           | No Class |
| 1435852_at   | Spred3                       | sprouty-related, EVH1 domain containing 3                                                               | No Class |
| 1460116_s_at | Spred1                       | sprouty protein with EVH-1 domain 1, related sequence                                                   | No Class |
| 1452911_at   | Spred1                       | sprouty protein with EVH-1 domain 1, related sequence                                                   | No Class |
| 1443652_x_at | Spred1                       | sprouty protein with EVH-1 domain 1, related sequence                                                   | No Class |
| 1428777_at   | Spred1                       | sprouty protein with EVH-1 domain 1, related sequence                                                   | No Class |
| 1423161_s_at | Spred1                       | sprouty protein with EVH-1 domain 1, related sequence                                                   | No Class |
| 1423658_at   | Spp13                        | signal peptide peptidase 3                                                                              | No Class |
| 1449254_at   | Spp1                         | secreted phosphoprotein 1                                                                               | No Class |
| 1416525_at   | Spop                         | speckle-type POZ protein                                                                                | No Class |
| 1459548_at   | Spire1                       | spire homolog 1 (Drosophila)                                                                            | No Class |
| 1458203_at   | Spire1                       | Spire homolog 1 (Drosophila)                                                                            | No Class |
| 1455409_at   | Spire1                       | spire homolog 1 (Drosophila)                                                                            | No Class |
| 1454962_at   | Spire1                       | spire homolog 1 (Drosophila)                                                                            | No Class |
| 1446117_at   | Spire1                       | spire homolog 1 (Drosophila)                                                                            | No Class |
| 1427985_at   | Spin4                        | spindlin family, member 4                                                                               | No Class |
| 1427833_at   | Spi16                        | serine protease inhibitor 16                                                                            | No Class |
| 1426149_at   | Spi15                        | serine protease inhibitor 15                                                                            | No Class |
| 1427166_a_at | Spg7                         | spastic paraplegia 7 homolog (human)                                                                    | No Class |
| 1451036_at   | Spg21                        | spastic paraplegia 21 homolog (human)                                                                   | No Class |
| 1424876_s_at | Spg20                        | spastic paraplegia 20, spartin (Troyer syndrome) homolog (human)                                        | No Class |
| 1424875_at   | Spg20                        | spastic paraplegia 20, spartin (Troyer syndrome) homolog (human)                                        | No Class |
| 1451886_at   | Speg                         | SPEG complex locus                                                                                      | No Class |
| 1430008_x_at | Speer5-ps1                   | spermatogenesis associated glutamate (E)-rich protein 5, pseudogene 1                                   | No Class |
| 1450907_at   | Spcs2                        | signal peptidase complex subunit 2 homolog (S. cerevisiae)                                              | No Class |
| 1448258_a_at | Spcs1                        | signal peptidase complex subunit 1 homolog (S. cerevisiae)                                              | No Class |
| 1431087_at   | Spc24                        | SPC24, NDC80 kinetochore complex component, homolog (S. cerevisiae)                                     | No Class |
| 1454237_at   | Spata9                       | spermatogenesis associated 9                                                                            | No Class |
| 1418650_at   | Spata6                       | spermatogenesis associated 6                                                                            | No Class |
| 1455863_at   | Spata511                     | spermatogenesis associated 5-like 1                                                                     | No Class |
| 1438844_x_at | Spata5                       | spermatogenesis associated 5                                                                            | No Class |
| 1417254_at   | Spata5                       | spermatogenesis associated 5                                                                            | No Class |

|              |                 |                                                                    |          |
|--------------|-----------------|--------------------------------------------------------------------|----------|
| 1430023_at   | Spata24         | spermatogenesis associated 24                                      | No Class |
| 1458204_at   | Sparc           | secreted acidic cysteine rich glycoprotein                         | No Class |
| 1437676_at   | Spag9           | sperm associated antigen 9                                         | No Class |
| 1433940_at   | Spag7           | sperm associated antigen 7                                         | No Class |
| 1429705_at   | Spaca4          | sperm acrosome associated 4                                        | No Class |
| 1437508_at   | Sp4             | trans-acting transcription factor 4                                | No Class |
| 1421504_at   | Sp4             | trans-acting transcription factor 4                                | No Class |
| 1447655_x_at | Sox6            | SRY-box containing gene 6                                          | No Class |
| 1434918_at   | Sox6            | SRY-box containing gene 6                                          | No Class |
| 1427677_a_at | Sox6            | SRY-box containing gene 6                                          | No Class |
| 1455535_at   | Sox5            | SRY-box containing gene 5                                          | No Class |
| 1440827_x_at | Sox5            | SRY-box containing gene 5                                          | No Class |
| 1458332_x_at | Sox4            | SRY-box containing gene 4                                          | No Class |
| 1443778_at   | Sox4            | SRY-box containing gene 4                                          | No Class |
| 1433575_at   | Sox4            | SRY-box containing gene 4                                          | No Class |
| 1419157_at   | Sox4            | SRY-box containing gene 4                                          | No Class |
| 1419156_at   | Sox4            | SRY-box containing gene 4                                          | No Class |
| 1419155_a_at | Sox4            | SRY-box containing gene 4                                          | No Class |
| 1435192_at   | Sox3            | SRY-box containing gene 3                                          | No Class |
| 1416967_at   | Sox2            | SRY-box containing gene 2                                          | No Class |
| 1453125_at   | Sox11           | SRY-box containing gene 11                                         | No Class |
| 1453002_at   | Sox11           | SRY-box containing gene 11                                         | No Class |
| 1436790_a_at | Sox11           | SRY-box containing gene 11                                         | No Class |
| 1429372_at   | Sox11           | SRY-box containing gene 11                                         | No Class |
| 1429051_s_at | Sox11           | SRY-box containing gene 11                                         | No Class |
| 1425369_a_at | Sox10           | SRY-box containing gene 10                                         | No Class |
| 1423362_at   | Sort1           | sortilin 1                                                         | No Class |
| 1460390_at   | Sorl1           | sortilin-related receptor, LDLR class A repeats-containing         | No Class |
| 1453003_at   | Sorl1           | sortilin-related receptor, LDLR class A repeats-containing         | No Class |
| 1426258_at   | Sorl1           | sortilin-related receptor, LDLR class A repeats-containing         | No Class |
| 1441624_at   | Sorbs2          | sorbin and SH3 domain containing 2                                 | No Class |
| 1440311_at   | Sorbs1          | sorbin and SH3 domain containing 1                                 | No Class |
| 1456630_x_at | Son             | Son DNA binding protein                                            | No Class |
| 1439074_a_at | Son             | Son DNA binding protein                                            | No Class |
| 1437924_at   | Son             | Son DNA binding protein                                            | No Class |
| 1420951_a_at | Son             | Son DNA binding protein                                            | No Class |
| 1434417_at   | Solh            | small optic lobes homolog (Drosophila)                             | No Class |
| 1434416_a_at | Solh            | small optic lobes homolog (Drosophila)                             | No Class |
| 1427785_x_at | Solh            | small optic lobes homolog (Drosophila)                             | No Class |
| 1460015_at   | Sohlh1          | spermatogenesis and oogenesis specific basic helix-loop-helix 1    | No Class |
| 1417697_at   | Soat1           | sterol O-acyltransferase 1                                         | No Class |
| 1417696_at   | Soat1           | sterol O-acyltransferase 1                                         | No Class |
| 1417695_a_at | Soat1           | sterol O-acyltransferase 1                                         | No Class |
| 1428527_at   | Snx7            | sorting nexin 7                                                    | No Class |
| 1417648_s_at | Snx5            | sorting nexin 5                                                    | No Class |
| 1417647_at   | Snx5            | sorting nexin 5                                                    | No Class |
| 1417646_a_at | Snx5            | sorting nexin 5                                                    | No Class |
| 1421797_a_at | Snx12           | sorting nexin 12                                                   | No Class |
| 1449840_at   | Sntb2           | syntrophin, basic 2                                                | No Class |
| 1436986_at   | Sntb2           | syntrophin, basic 2                                                | No Class |
| 1435716_x_at | Snrpn /// Snurf | small nuclear ribonucleoprotein N /// SNRPN upstream reading frame | No Class |
| 1415896_x_at | Snrpn /// Snurf | small nuclear ribonucleoprotein N /// SNRPN upstream reading frame | No Class |
| 1415895_at   | Snrpn /// Snurf | small nuclear ribonucleoprotein N /// SNRPN upstream reading frame | No Class |
| 1428672_at   | Snrpf           | small nuclear ribonucleoprotein polypeptide F                      | No Class |
| 1451294_s_at | Snrpe           | small nuclear ribonucleoprotein E                                  | No Class |
| 1452680_at   | Snrpd2          | small nuclear ribonucleoprotein D2                                 | No Class |
| 1452422_a_at | Snrpb2          | U2 small nuclear ribonucleoprotein B                               | No Class |

|              |          |                                                                                                         |          |
|--------------|----------|---------------------------------------------------------------------------------------------------------|----------|
| 1437193_s_at | Snrpb    | small nuclear ribonucleoprotein B                                                                       | No Class |
| 1419260_a_at | Snrpb    | small nuclear ribonucleoprotein B                                                                       | No Class |
| 1437180_at   | Snrnp48  | small nuclear ribonucleoprotein 48 (U11/U12)                                                            | No Class |
| 1425319_s_at | Snrnp48  | small nuclear ribonucleoprotein 48 (U11/U12)                                                            | No Class |
| 1452713_a_at | Snrnp40  | small nuclear ribonucleoprotein 40 (U5)                                                                 | No Class |
| 1454772_at   | Snrnp200 | small nuclear ribonucleoprotein 200 (U5)                                                                | No Class |
| 1459773_x_at | Snip1    | Smad nuclear interacting protein 1                                                                      | No Class |
| 1447484_x_at | Snhg7    | Small nucleolar RNA host gene (non-protein coding) 7                                                    | No Class |
| 1447483_s_at | Snhg7    | Small nucleolar RNA host gene (non-protein coding) 7                                                    | No Class |
| 1433789_at   | Snhg3    | small nucleolar RNA host gene (non-protein coding) 3                                                    | No Class |
| 1436040_at   | Snhg12   | small nucleolar RNA host gene 12                                                                        | No Class |
| 1433675_at   | Snhg1    | small nucleolar RNA host gene (non-protein coding) 1                                                    | No Class |
| 1433674_a_at | Snhg1    | small nucleolar RNA host gene (non-protein coding) 1                                                    | No Class |
| 1435603_at   | Sned1    | sushi, nidogen and EGF-like domains 1                                                                   | No Class |
| 1416038_at   | Snd1     | staphylococcal nuclease and tudor domain containing 1                                                   | No Class |
| 1423499_at   | Sncaip   | synuclein, alpha interacting protein (synphilin)                                                        | No Class |
| 1426578_s_at | Snapi    | SNAP-associated protein                                                                                 | No Class |
| 1428761_a_at | Snapi3   | small nuclear RNA activating complex, polypeptide 3                                                     | No Class |
| 1448726_at   | Snapi2   | small nuclear RNA activating complex, polypeptide 2                                                     | No Class |
| 1436703_x_at | Snapi2   | small nuclear RNA activating complex, polypeptide 2                                                     | No Class |
| 1423745_at   | Snapi47  | synaptosomal-associated protein, 47                                                                     | No Class |
| 1423355_at   | Snapi29  | synaptosomal-associated protein 29                                                                      | No Class |
| 1420897_at   | Snapi23  | synaptosomal-associated protein 23                                                                      | No Class |
| 1420896_at   | Snapi23  | synaptosomal-associated protein 23                                                                      | No Class |
| 1447643_x_at | Snai2    | snail homolog 2 (Drosophila)                                                                            | No Class |
| 1425479_at   | Smyd5    | SET and MYND domain containing 5                                                                        | No Class |
| 1455794_at   | Smtnl2   | smoothelin-like 2                                                                                       | No Class |
| 1419145_at   | Smtnl1   | smoothelin-like 1                                                                                       | No Class |
| 1429530_a_at | Smpd4    | sphingomyelin phosphodiesterase 4                                                                       | No Class |
| 1429043_at   | Smdnc1   | survival motor neuron domain containing 1                                                               | No Class |
| 1457522_at   | Smek1    | SMEK homolog 1, suppressor of mek1 (Dictyostelium)                                                      | No Class |
| 1435742_at   | Smek1    | SMEK homolog 1, suppressor of mek1 (Dictyostelium)                                                      | No Class |
| 1442497_at   | Smchd1   | SMC hinge domain containing 1                                                                           | No Class |
| 1452197_at   | Smc4     | structural maintenance of chromosomes 4                                                                 | No Class |
| 1427276_at   | Smc4     | structural maintenance of chromosomes 4                                                                 | No Class |
| 1427275_at   | Smc4     | structural maintenance of chromosomes 4                                                                 | No Class |
| 1450950_at   | Smc3     | structural maintenance of chromosomes 3                                                                 | No Class |
| 1429658_a_at | Smc2     | structural maintenance of chromosomes 2                                                                 | No Class |
| 1449253_at   | Smc1b    | structural maintenance of chromosomes 1B                                                                | No Class |
| 1435856_x_at | Smarcb1  | SWI/SNF related, matrix associated, actin dependent regulator of chromatin, subfamily b, member 1       | No Class |
| 1452276_at   | Smarcad1 | SWI/SNF-related, matrix-associated actin-dependent regulator of chromatin, subfamily a, containing DEAD | No Class |
| 1424207_at   | Smarca5  | SWI/SNF related, matrix associated, actin dependent regulator of chromatin, subfamily a, member 5       | No Class |
| 1424206_at   | Smarca5  | SWI/SNF related, matrix associated, actin dependent regulator of chromatin, subfamily a, member 5       | No Class |
| 1422771_at   | Smad6    | MAD homolog 6 (Drosophila)                                                                              | No Class |
| 1450472_s_at | Smad3    | MAD homolog 3 (Drosophila)                                                                              | No Class |
| 1450471_at   | Smad3    | MAD homolog 3 (Drosophila)                                                                              | No Class |
| 1443426_at   | Sltm     | SAFB-like, transcription modulator                                                                      | No Class |
| 1429624_at   | Sltm     | SAFB-like, transcription modulator                                                                      | No Class |
| 1420883_at   | Sln      | sarcophilin                                                                                             | No Class |
| 1441483_at   | Slitrk2  | SLIT and NTRK-like family, member 2                                                                     | No Class |
| 1427086_at   | Slit3    | Slit homolog 3 (Drosophila)                                                                             | No Class |
| 1458140_at   | Slit2    | slit homolog 2 (Drosophila)                                                                             | No Class |
| 1451430_at   | Slit2    | slit homolog 2 (Drosophila)                                                                             | No Class |
| 1418612_at   | Slnf1    | schlafen 1                                                                                              | No Class |
| 1444242_at   | Slco2a1  | Solute carrier organic anion transporter family, member 2a1                                             | No Class |
| 1420914_at   | Slco2a1  | solute carrier organic anion transporter family, member 2a1                                             | No Class |
| 1420913_at   | Slco2a1  | solute carrier organic anion transporter family, member 2a1                                             | No Class |

|              |          |                                                                                                      |          |
|--------------|----------|------------------------------------------------------------------------------------------------------|----------|
| 1420379_at   | Slco1a1  | solute carrier organic anion transporter family, member 1a1                                          | No Class |
| 1431205_at   | Slc9a8   | Solute carrier family 9 (sodium/hydrogen exchanger), member 8                                        | No Class |
| 1452976_a_at | Slc9a3r2 | solute carrier family 9 (sodium/hydrogen exchanger), member 3 regulator 2                            | No Class |
| 1439369_x_at | Slc9a3r2 | solute carrier family 9 (sodium/hydrogen exchanger), member 3 regulator 2                            | No Class |
| 1428955_x_at | Slc9a3r2 | solute carrier family 9 (sodium/hydrogen exchanger), member 3 regulator 2                            | No Class |
| 1428954_at   | Slc9a3r2 | solute carrier family 9 (sodium/hydrogen exchanger), member 3 regulator 2                            | No Class |
| 1438116_x_at | Slc9a3r1 | solute carrier family 9 (sodium/hydrogen exchanger), member 3 regulator 1                            | No Class |
| 1441236_at   | Slc9a3   | solute carrier family 9 (sodium/hydrogen exchanger), member 3                                        | No Class |
| 1417392_a_at | Slc7a7   | solute carrier family 7 (cationic amino acid transporter, y+ system), member 7                       | No Class |
| 1436776_x_at | Slc7a4   | solute carrier family 7 (cationic amino acid transporter, y+ system), member 4                       | No Class |
| 1426069_s_at | Slc7a4   | solute carrier family 7 (cationic amino acid transporter, y+ system), member 4                       | No Class |
| 1426068_at   | Slc7a4   | solute carrier family 7 (cationic amino acid transporter, y+ system), member 4                       | No Class |
| 1417022_at   | Slc7a3   | solute carrier family 7 (cationic amino acid transporter, y+ system), member 3                       | No Class |
| 1443536_at   | Slc7a11  | solute carrier family 7 (cationic amino acid transporter, y+ system), member 11                      | No Class |
| 1420413_at   | Slc7a11  | solute carrier family 7 (cationic amino acid transporter, y+ system), member 11                      | No Class |
| 1421533_at   | Slc7a1   | solute carrier family 7 (cationic amino acid transporter, y+ system), member 1                       | No Class |
| 1455469_at   | Slc6a7   | solute carrier family 6 (neurotransmitter transporter, L-proline), member 7                          | No Class |
| 1437149_at   | Slc6a6   | solute carrier family 6 (neurotransmitter transporter, taurine), member 6                            | No Class |
| 1440227_at   | Slc5a3   | solute carrier family 5 (inositol transporters), member 3                                            | No Class |
| 1435484_at   | Slc5a3   | solute carrier family 5 (inositol transporters), member 3                                            | No Class |
| 1440834_at   | Slc5a10  | solute carrier family 5 (sodium/glucose cotransporter), member 10                                    | No Class |
| 1452071_at   | Slc4a4   | solute carrier family 4 (anion exchanger), member 4                                                  | No Class |
| 1426432_a_at | Slc4a4   | solute carrier family 4 (anion exchanger), member 4                                                  | No Class |
| 1438860_a_at | Slc44a2  | solute carrier family 44, member 2                                                                   | No Class |
| 1438559_x_at | Slc44a2  | solute carrier family 44, member 2                                                                   | No Class |
| 1428065_at   | Slc44a2  | solute carrier family 44, member 2                                                                   | No Class |
| 1451707_s_at | Slc41a3  | solute carrier family 41, member 3                                                                   | No Class |
| 1425440_x_at | Slc41a3  | solute carrier family 41, member 3                                                                   | No Class |
| 1425439_a_at | Slc41a3  | solute carrier family 41, member 3                                                                   | No Class |
| 1448482_at   | Slc39a8  | solute carrier family 39 (metal ion transporter), member 8                                           | No Class |
| 1416832_at   | Slc39a8  | solute carrier family 39 (metal ion transporter), member 8                                           | No Class |
| 1416949_s_at | Slc39a7  | solute carrier family 39 (zinc transporter), member 7                                                | No Class |
| 1441949_x_at | Slc39a6  | solute carrier family 39 (metal ion transporter), member 6                                           | No Class |
| 1424675_at   | Slc39a6  | solute carrier family 39 (metal ion transporter), member 6                                           | No Class |
| 1439041_at   | Slc39a10 | solute carrier family 39 (zinc transporter), member 10                                               | No Class |
| 1455612_at   | Slc38a9  | solute carrier family 38, member 9                                                                   | No Class |
| 1449791_x_at | Slc38a9  | solute carrier family 38, member 9                                                                   | No Class |
| 1447784_x_at | Slc38a9  | solute carrier family 38, member 9                                                                   | No Class |
| 1436456_at   | Slc38a9  | solute carrier family 38, member 9                                                                   | No Class |
| 1434616_at   | Slc38a10 | solute carrier family 38, member 10                                                                  | No Class |
| 1429979_a_at | Slc38a10 | solute carrier family 38, member 10                                                                  | No Class |
| 1427295_at   | Slc38a10 | solute carrier family 38, member 10                                                                  | No Class |
| 1427294_a_at | Slc38a10 | solute carrier family 38, member 10                                                                  | No Class |
| 1453915_a_at | Slc37a3  | solute carrier family 37 (glycerol-3-phosphate transporter), member 3                                | No Class |
| 1452059_at   | Slc35f5  | solute carrier family 35, member F5                                                                  | No Class |
| 1434103_at   | Slc35e1  | solute carrier family 35, member E1                                                                  | No Class |
| 1453300_at   | Slc35d2  | solute carrier family 35, member D2                                                                  | No Class |
| 1445629_at   | Slc35d1  | Solute carrier family 35 (UDP-glucuronic acid/UDP-N-acetylgalactosamine dual transporter), member D1 | No Class |
| 1433595_at   | Slc35d1  | solute carrier family 35 (UDP-glucuronic acid/UDP-N-acetylgalactosamine dual transporter), member D1 | No Class |
| 1460731_at   | Slc35c2  | solute carrier family 35, member C2                                                                  | No Class |
| 1420055_at   | Slc35c2  | solute carrier family 35, member C2                                                                  | No Class |
| 1420054_s_at | Slc35c2  | solute carrier family 35, member C2                                                                  | No Class |
| 1452139_at   | Slc35c1  | solute carrier family 35, member C1                                                                  | No Class |
| 1416550_at   | Slc35b4  | solute carrier family 35, member B4                                                                  | No Class |
| 1416549_at   | Slc35b4  | solute carrier family 35, member B4                                                                  | No Class |
| 1416548_at   | Slc35b4  | solute carrier family 35, member B4                                                                  | No Class |
| 1423927_at   | Slc35b2  | solute carrier family 35, member B2                                                                  | No Class |

|              |          |                                                                                                         |          |
|--------------|----------|---------------------------------------------------------------------------------------------------------|----------|
| 1457024_x_at | Slc35a2  | solute carrier family 35 (UDP-galactose transporter), member A2                                         | No Class |
| 1439433_a_at | Slc35a2  | solute carrier family 35 (UDP-galactose transporter), member A2                                         | No Class |
| 1436664_a_at | Slc35a2  | solute carrier family 35 (UDP-galactose transporter), member A2                                         | No Class |
| 1432533_a_at | Slc35a2  | solute carrier family 35 (UDP-galactose transporter), member A2                                         | No Class |
| 1422827_x_at | Slc35a2  | solute carrier family 35 (UDP-galactose transporter), member A2                                         | No Class |
| 1439519_at   | Slc34a3  | solute carrier family 34 (sodium phosphate), member 3                                                   | No Class |
| 1439934_at   | Slc30a10 | solute carrier family 30, member 10                                                                     | No Class |
| 1438751_at   | Slc30a10 | solute carrier family 30, member 10                                                                     | No Class |
| 1427770_a_at | Slc2a3   | solute carrier family 2 (facilitated glucose transporter), member 3                                     | No Class |
| 1421924_at   | Slc2a3   | solute carrier family 2 (facilitated glucose transporter), member 3                                     | No Class |
| 1449477_s_at | Slc2a10  | solute carrier family 2 (facilitated glucose transporter), member 10                                    | No Class |
| 1419434_at   | Slc2a10  | solute carrier family 2 (facilitated glucose transporter), member 10                                    | No Class |
| 1434773_a_at | Slc2a1   | solute carrier family 2 (facilitated glucose transporter), member 1                                     | No Class |
| 1426600_at   | Slc2a1   | solute carrier family 2 (facilitated glucose transporter), member 1                                     | No Class |
| 1426599_a_at | Slc2a1   | solute carrier family 2 (facilitated glucose transporter), member 1                                     | No Class |
| 1419571_at   | Slc28a3  | solute carrier family 28 (sodium-coupled nucleoside transporter), member 3                              | No Class |
| 1435658_at   | Slc27a1  | solute carrier family 27 (fatty acid transporter), member 1                                             | No Class |
| 1422811_at   | Slc27a1  | solute carrier family 27 (fatty acid transporter), member 1                                             | No Class |
| 1447783_x_at | Slc25a39 | solute carrier family 25, member 39                                                                     | No Class |
| 1451489_at   | Slc25a35 | solute carrier family 25, member 35                                                                     | No Class |
| 1450018_s_at | Slc25a30 | solute carrier family 25, member 30                                                                     | No Class |
| 1425948_a_at | Slc25a30 | solute carrier family 25, member 30                                                                     | No Class |
| 1420836_at   | Slc25a30 | solute carrier family 25, member 30                                                                     | No Class |
| 1420835_at   | Slc25a30 | solute carrier family 25, member 30                                                                     | No Class |
| 1447856_x_at | Slc25a25 | solute carrier family 25 (mitochondrial carrier, phosphate carrier), member 25                          | No Class |
| 1453885_at   | Slc24a2  | solute carrier family 24 (sodium/potassium/calcium exchanger), member 2                                 | No Class |
| 1425038_at   | Slc22a9  | solute carrier family 22 (organic anion transporter), member 9                                          | No Class |
| 1420444_at   | Slc22a3  | solute carrier family 22 (organic cation transporter), member 3                                         | No Class |
| 1449215_at   | Slc22a21 | solute carrier family 22 (organic cation transporter), member 21                                        | No Class |
| 1460386_a_at | Slc1a1   | solute carrier family 1 (neuronal/epithelial high affinity glutamate transporter, system Xag), member 1 | No Class |
| 1448299_at   | Slc1a1   | solute carrier family 1 (neuronal/epithelial high affinity glutamate transporter, system Xag), member 1 | No Class |
| 1425415_a_at | Slc1a1   | solute carrier family 1 (neuronal/epithelial high affinity glutamate transporter, system Xag), member 1 | No Class |
| 1426117_a_at | Slc19a2  | solute carrier family 19 (thiamine transporter), member 2                                               | No Class |
| 1418445_at   | Slc16a2  | solute carrier family 16 (monocarboxylic acid transporters), member 2                                   | No Class |
| 1453675_at   | Slc16a10 | solute carrier family 16 (monocarboxylic acid transporters), member 10                                  | No Class |
| 1436368_at   | Slc16a10 | solute carrier family 16 (monocarboxylic acid transporters), member 10                                  | No Class |
| 1448640_at   | Slc14a1  | solute carrier family 14 (urea transporter), member 1                                                   | No Class |
| 1428114_at   | Slc14a1  | solute carrier family 14 (urea transporter), member 1                                                   | No Class |
| 1458918_at   | Slc12a8  | solute carrier family 12 (potassium/chloride transporters), member 8                                    | No Class |
| 1418257_at   | Slc12a7  | solute carrier family 12, member 7                                                                      | No Class |
| 1436989_s_at | Slc12a6  | solute carrier family 12, member 6                                                                      | No Class |
| 1432798_at   | Slc12a6  | solute carrier family 12, member 6                                                                      | No Class |
| 1448780_at   | Slc12a2  | solute carrier family 12, member 2                                                                      | No Class |
| 1417622_at   | Slc12a2  | solute carrier family 12, member 2                                                                      | No Class |
| 1460168_at   | Slbp     | stem-loop binding protein                                                                               | No Class |
| 1457773_at   | Slamf6   | SLAM family member 6                                                                                    | No Class |
| 1424823_s_at | Slain1   | SLAIN motif family, member 1                                                                            | No Class |
| 1424822_at   | Slain1   | SLAIN motif family, member 1                                                                            | No Class |
| 1441761_at   | Slc      | Src-like adaptor                                                                                        | No Class |
| 1460247_a_at | Skp2     | S-phase kinase-associated protein 2 (p45)                                                               | No Class |
| 1437033_a_at | Skp2     | S-phase kinase-associated protein 2 (p45)                                                               | No Class |
| 1436000_a_at | Skp2     | S-phase kinase-associated protein 2 (p45)                                                               | No Class |
| 1425072_at   | Skp2     | S-phase kinase-associated protein 2 (p45)                                                               | No Class |
| 1418969_at   | Skp2     | S-phase kinase-associated protein 2 (p45)                                                               | No Class |
| 1426718_at   | Skiv212  | superkiller viralicidic activity 2-like 2 (S. cerevisiae)                                               | No Class |
| 1456862_at   | Six4     | sine oculis-related homeobox 4 homolog (Drosophila)                                                     | No Class |
| 1439753_x_at | Six4     | sine oculis-related homeobox 4 homolog (Drosophila)                                                     | No Class |

|              |          |                                                                                    |          |
|--------------|----------|------------------------------------------------------------------------------------|----------|
| 1427701_a_at | Six4     | sine oculis-related homeobox 4 homolog (Drosophila)                                | No Class |
| 1425767_a_at | Six4     | sine oculis-related homeobox 4 homolog (Drosophila)                                | No Class |
| 1427523_at   | Six3     | sine oculis-related homeobox 3 homolog (Drosophila)                                | No Class |
| 1452020_a_at | Siva1    | SIVA1, apoptosis-inducing factor                                                   | No Class |
| 1426323_x_at | Siva1    | SIVA1, apoptosis-inducing factor                                                   | No Class |
| 1418377_a_at | Siva1    | SIVA1, apoptosis-inducing factor                                                   | No Class |
| 1423507_a_at | Sirt2    | sirtuin 2 (silent mating type information regulation 2, homolog) 2 (S. cerevisiae) | No Class |
| 1458683_at   | Sirpb1a  | signal-regulatory protein beta 1A                                                  | No Class |
| 1416985_at   | Sirpa    | signal-regulatory protein alpha                                                    | No Class |
| 1428493_at   | Sipa1l3  | signal-induced proliferation-associated 1 like 3                                   | No Class |
| 1451044_at   | Sip1     | survival of motor neuron protein interacting protein 1                             | No Class |
| 1424355_a_at | Sin3b    | transcriptional regulator, SIN3B (yeast)                                           | No Class |
| 1419102_at   | Sin3a    | transcriptional regulator, SIN3A (yeast)                                           | No Class |
| 1419438_at   | Sim2     | single-minded homolog 2 (Drosophila)                                               | No Class |
| 1419437_at   | Sim2     | single-minded homolog 2 (Drosophila)                                               | No Class |
| 1451956_a_at | Sigmar1  | sigma non-opioid intracellular receptor 1                                          | No Class |
| 1416750_at   | Sigmar1  | sigma non-opioid intracellular receptor 1                                          | No Class |
| 1426551_at   | Sid1     | SID1 transmembrane family, member 1                                                | No Class |
| 1444485_at   | Shq1     | SHQ1 homolog (S. cerevisiae)                                                       | No Class |
| 1430582_at   | Shprh    | SNF2 histone linker PHD RING helicase                                              | No Class |
| 1438042_at   | Shox2    | short stature homeobox 2                                                           | No Class |
| 1420559_a_at | Shox2    | short stature homeobox 2                                                           | No Class |
| 1455985_x_at | Shmt2    | serine hydroxymethyltransferase 2 (mitochondrial)                                  | No Class |
| 1455084_x_at | Shmt2    | serine hydroxymethyltransferase 2 (mitochondrial)                                  | No Class |
| 1434204_x_at | Shmt2    | serine hydroxymethyltransferase 2 (mitochondrial)                                  | No Class |
| 1426423_at   | Shmt2    | serine hydroxymethyltransferase 2 (mitochondrial)                                  | No Class |
| 1425178_s_at | Shmt1    | serine hydroxymethyltransferase 1 (soluble)                                        | No Class |
| 1425177_at   | Shmt1    | serine hydroxymethyltransferase 1 (soluble)                                        | No Class |
| 1423852_at   | Shisa2   | shisa homolog 2 (Xenopus laevis)                                                   | No Class |
| 1423851_a_at | Shisa2   | shisa homolog 2 (Xenopus laevis)                                                   | No Class |
| 1457094_at   | She      | src homology 2 domain-containing transforming protein E                            | No Class |
| 1438227_at   | She      | src homology 2 domain-containing transforming protein E                            | No Class |
| 1422853_at   | Shc1     | src homology 2 domain-containing transforming protein C1                           | No Class |
| 1456640_at   | Sh3rf2   | SH3 domain containing ring finger 2                                                | No Class |
| 1432269_a_at | Sh3kbp1  | SH3-domain kinase binding protein 1                                                | No Class |
| 1431592_a_at | Sh3kbp1  | SH3-domain kinase binding protein 1                                                | No Class |
| 1418791_at   | Sh3gl2   | SH3-domain GRB2-like 2                                                             | No Class |
| 1449084_s_at | Sh3d19   | SH3 domain protein D19                                                             | No Class |
| 1418461_at   | Sh3d19   | SH3 domain protein D19                                                             | No Class |
| 1418460_at   | Sh3d19   | SH3 domain protein D19                                                             | No Class |
| 1434211_at   | Sh3bgrl2 | SH3 domain binding glutamic acid-rich protein like 2                               | No Class |
| 1434109_at   | Sh3bgrl2 | SH3 domain binding glutamic acid-rich protein like 2                               | No Class |
| 1436997_x_at | Sh3bgrl  | SH3-binding domain glutamic acid-rich protein like                                 | No Class |
| 1428107_at   | Sh3bgrl  | SH3-binding domain glutamic acid-rich protein like                                 | No Class |
| 1421871_at   | Sh3bgrl  | SH3-binding domain glutamic acid-rich protein like                                 | No Class |
| 1439434_x_at | Sh2d5    | SH2 domain containing 5                                                            | No Class |
| 1436100_at   | Sh2d5    | SH2 domain containing 5                                                            | No Class |
| 1453377_at   | Sh2d4a   | SH2 domain containing 4A                                                           | No Class |
| 1449105_at   | Sh2d2a   | SH2 domain protein 2A                                                              | No Class |
| 1415893_at   | Sgpl1    | sphingosine phosphate lyase 1                                                      | No Class |
| 1439510_at   | Sgol1    | shugoshin-like 1 (S. pombe)                                                        | No Class |
| 1429029_at   | Sgms2    | sphingomyelin synthase 2                                                           | No Class |
| 1428663_at   | Sgms2    | sphingomyelin synthase 2                                                           | No Class |
| 1431300_at   | Sgjp1    | SH3-domain GRB2-like (endophilin) interacting protein 1                            | No Class |
| 1438675_at   | Sfrs8    | splicing factor, arginine/serine-rich 8                                            | No Class |
| 1424997_at   | Sfrs8    | splicing factor, arginine/serine-rich 8                                            | No Class |
| 1448454_at   | Sfrs6    | splicing factor, arginine/serine-rich 6                                            | No Class |

|              |           |                                                                                                     |          |
|--------------|-----------|-----------------------------------------------------------------------------------------------------|----------|
| 1427816_at   | Sfrs2     | splicing factor, arginine/serine-rich 2 (SC-35)                                                     | No Class |
| 1451031_at   | Sfrp4     | secreted frizzled-related protein 4                                                                 | No Class |
| 1438458_a_at | Sfpq      | splicing factor proline/glutamine rich (polypyrimidine tract binding protein associated)            | No Class |
| 1423796_at   | Sfpq      | splicing factor proline/glutamine rich (polypyrimidine tract binding protein associated)            | No Class |
| 1418747_at   | Sfpi1     | SFFV proviral integration 1                                                                         | No Class |
| 1437972_s_at | Sf3b5     | splicing factor 3b, subunit 5                                                                       | No Class |
| 1415985_at   | Sf3b3     | splicing factor 3b, subunit 3                                                                       | No Class |
| 1456352_a_at | Sf3b2     | splicing factor 3b, subunit 2                                                                       | No Class |
| 1456040_at   | Sf3b2     | splicing factor 3b, subunit 2                                                                       | No Class |
| 1423811_at   | Sf3a3     | splicing factor 3a, subunit 3                                                                       | No Class |
| 1449333_at   | Sf3a1     | splicing factor 3a, subunit 1                                                                       | No Class |
| 1459766_x_at | Sf1       | splicing factor 1                                                                                   | No Class |
| 1422321_a_at | Sf1       | splicing factor 1                                                                                   | No Class |
| 1427674_a_at | Sez6      | seizure related gene 6                                                                              | No Class |
| 1428797_at   | Setd6     | SET domain containing 6                                                                             | No Class |
| 1460373_a_at | Setd4     | SET domain containing 4                                                                             | No Class |
| 1440163_at   | Setd3     | SET domain containing 3                                                                             | No Class |
| 1426854_a_at | Set       | SET translocation                                                                                   | No Class |
| 1426853_at   | Set       | SET translocation                                                                                   | No Class |
| 1416702_at   | Serpini1  | serine (or cysteine) peptidase inhibitor, clade I, member 1                                         | No Class |
| 1416625_at   | Serping1  | serine (or cysteine) peptidase inhibitor, clade G, member 1                                         | No Class |
| 1417498_at   | Serpinf2  | serine (or cysteine) peptidase inhibitor, clade F, member 2                                         | No Class |
| 1416666_at   | Serpine2  | serine (or cysteine) peptidase inhibitor, clade E, member 2                                         | No Class |
| 1439790_at   | Serpinb9  | serine (or cysteine) peptidase inhibitor, clade B, member 9                                         | No Class |
| 1422601_at   | Serpinb9  | serine (or cysteine) peptidase inhibitor, clade B, member 9                                         | No Class |
| 1449500_at   | Serpinb7  | serine (or cysteine) peptidase inhibitor, clade B, member 7                                         | No Class |
| 1421564_at   | Serpina3c | serine (or cysteine) peptidase inhibitor, clade A, member 3C                                        | No Class |
| 1435887_at   | Serpina11 | serine (or cysteine) peptidase inhibitor, clade A (alpha-1 antiproteinase, antitrypsin), member 11  | No Class |
| 1424758_s_at | Serpina10 | serine (or cysteine) peptidase inhibitor, clade A (alpha-1 antiproteinase, antitrypsin), member 10  | No Class |
| 1456080_a_at | Serinc3   | serine incorporator 3                                                                               | No Class |
| 1448847_at   | Serinc3   | serine incorporator 3                                                                               | No Class |
| 1417816_s_at | Serinc3   | serine incorporator 3                                                                               | No Class |
| 1454811_a_at | Serinc1   | serine incorporator 1                                                                               | No Class |
| 1448108_at   | Serinc1   | serine incorporator 1                                                                               | No Class |
| 1437513_a_at | Serinc1   | serine incorporator 1                                                                               | No Class |
| 1415838_at   | Serinc1   | serine incorporator 1                                                                               | No Class |
| 1455236_x_at | Serf2     | small EDRK-rich factor 2                                                                            | No Class |
| 1437683_x_at | Serf2     | small EDRK-rich factor 2                                                                            | No Class |
| 1435738_x_at | Serf2     | small EDRK-rich factor 2                                                                            | No Class |
| 1418565_at   | Serbp1    | serpine1 mRNA binding protein 1                                                                     | No Class |
| 1451717_s_at | Senp2     | SUMO/sentrin specific peptidase 2                                                                   | No Class |
| 1425466_at   | Senp2     | SUMO/sentrin specific peptidase 2                                                                   | No Class |
| 1425465_a_at | Senp2     | SUMO/sentrin specific peptidase 2                                                                   | No Class |
| 1423454_a_at | Sema6c    | sema domain, transmembrane domain (TM), and cytoplasmic domain, (semaphorin) 6C                     | No Class |
| 1437422_at   | Sema5a    | sema domain, seven thrombospondin repeats (type 1 and type 1-like), transmembrane domain (TM) and s | No Class |
| 1442226_at   | Sema3e    | sema domain, immunoglobulin domain (Ig), short basic domain, secreted, (semaphorin) 3E              | No Class |
| 1427673_a_at | Sema3e    | sema domain, immunoglobulin domain (Ig), short basic domain, secreted, (semaphorin) 3E              | No Class |
| 1425906_a_at | Sema3e    | sema domain, immunoglobulin domain (Ig), short basic domain, secreted, (semaphorin) 3E              | No Class |
| 1419717_at   | Sema3e    | sema domain, immunoglobulin domain (Ig), short basic domain, secreted, (semaphorin) 3E              | No Class |
| 1431795_a_at | Sema3b    | sema domain, immunoglobulin domain (Ig), short basic domain, secreted, (semaphorin) 3B              | No Class |
| 1449865_at   | Sema3a    | sema domain, immunoglobulin domain (Ig), short basic domain, secreted, (semaphorin) 3A              | No Class |
| 1420416_at   | Sema3a    | sema domain, immunoglobulin domain (Ig), short basic domain, secreted, (semaphorin) 3A              | No Class |
| 1449906_at   | Selp      | selectin, platelet                                                                                  | No Class |
| 1424394_at   | Selm      | selenoprotein M                                                                                     | No Class |
| 1447909_s_at | Selk      | selenoprotein K                                                                                     | No Class |
| 1423225_at   | Selk      | selenoprotein K                                                                                     | No Class |
| 1453559_a_at | Sel1l     | sel-1 suppressor of lin-12-like (C. elegans)                                                        | No Class |

|              |         |                                                                       |          |
|--------------|---------|-----------------------------------------------------------------------|----------|
| 1430692_a_at | Sel1l   | sel-1 suppressor of lin-12-like (C. elegans)                          | No Class |
| 1425187_at   | Sel1l   | sel-1 suppressor of lin-12-like (C. elegans)                          | No Class |
| 1424202_at   | Seh1l   | SEH1-like (S. cerevisiae)                                             | No Class |
| 1424201_a_at | Seh1l   | SEH1-like (S. cerevisiae)                                             | No Class |
| 1419479_at   | Sectm1b | secreted and transmembrane 1B                                         | No Class |
| 1424926_at   | Sec63   | SEC63-like (S. cerevisiae)                                            | No Class |
| 1417083_at   | Sec61b  | Sec61 beta subunit                                                    | No Class |
| 1449944_a_at | Sec61a2 | Sec61, alpha subunit 2 (S. cerevisiae)                                | No Class |
| 1420644_a_at | Sec61a2 | Sec61, alpha subunit 2 (S. cerevisiae)                                | No Class |
| 1416191_at   | Sec61a1 | Sec61 alpha 1 subunit (S. cerevisiae)                                 | No Class |
| 1416190_a_at | Sec61a1 | Sec61 alpha 1 subunit (S. cerevisiae)                                 | No Class |
| 1426972_at   | Sec24d  | Sec24 related gene family, member D (S. cerevisiae)                   | No Class |
| 1452147_at   | Sec24c  | Sec24 related gene family, member C (S. cerevisiae)                   | No Class |
| 1423347_at   | Sec23a  | SEC23A (S. cerevisiae)                                                | No Class |
| 1416241_at   | Sec13   | SEC13 homolog (S. cerevisiae)                                         | No Class |
| 1418224_at   | Sec11a  | SEC11 homolog A (S. cerevisiae)                                       | No Class |
| 1443832_s_at | Sdpr    | serum deprivation response                                            | No Class |
| 1416779_at   | Sdpr    | serum deprivation response                                            | No Class |
| 1416778_at   | Sdpr    | serum deprivation response                                            | No Class |
| 1430425_at   | Sdk2    | sidekick homolog 2 (chicken)                                          | No Class |
| 1437489_x_at | Sdhd    | succinate dehydrogenase complex, subunit D, integral membrane protein | No Class |
| 1448630_a_at | Sdhc    | succinate dehydrogenase complex, subunit C, integral membrane protein | No Class |
| 1435986_x_at | Sdhc    | succinate dehydrogenase complex, subunit C, integral membrane protein | No Class |
| 1433293_at   | Sdha    | succinate dehydrogenase complex, subunit A, flavoprotein (Fp)         | No Class |
| 1426393_a_at | Sdf4    | stromal cell derived factor 4                                         | No Class |
| 1448158_at   | Sdc1    | syndecan 1                                                            | No Class |
| 1437279_x_at | Sdc1    | syndecan 1                                                            | No Class |
| 1415944_at   | Sdc1    | syndecan 1                                                            | No Class |
| 1415943_at   | Sdc1    | syndecan 1                                                            | No Class |
| 1451051_a_at | Scyl1   | SCY1-like 1 (S. cerevisiae)                                           | No Class |
| 1430354_x_at | Scyl1   | SCY1-like 1 (S. cerevisiae)                                           | No Class |
| 1428983_at   | Scx     | scleraxis                                                             | No Class |
| 1418805_at   | Sct     | secretin                                                              | No Class |
| 1428718_at   | Scrn1   | secernin 1                                                            | No Class |
| 1428717_at   | Scrn1   | secernin 1                                                            | No Class |
| 1426555_at   | Scpep1  | serine carboxypeptidase 1                                             | No Class |
| 1449686_s_at | Scp2    | sterol carrier protein 2, liver                                       | No Class |
| 1419975_at   | Scp2    | Sterol carrier protein 2, liver                                       | No Class |
| 1430999_a_at | Scoc    | short coiled-coil protein                                             | No Class |
| 1416267_at   | Scoc    | short coiled-coil protein                                             | No Class |
| 1457412_at   | Scn8a   | sodium channel, voltage-gated, type VIII, alpha                       | No Class |
| 1436043_at   | Scn7a   | sodium channel, voltage-gated, type VII, alpha                        | No Class |
| 1435767_at   | Scn3b   | sodium channel, voltage-gated, type III, beta                         | No Class |
| 1450266_at   | Scn10a  | sodium channel, voltage-gated, type X, alpha                          | No Class |
| 1450276_a_at | Scin    | scinderin                                                             | No Class |
| 1415823_at   | Scd2    | stearoyl-Coenzyme A desaturase 2                                      | No Class |
| 1460235_at   | Scarb2  | scavenger receptor class B, member 2                                  | No Class |
| 1448404_at   | Scamp2  | secretory carrier membrane protein 2                                  | No Class |
| 1416611_at   | Scamp2  | secretory carrier membrane protein 2                                  | No Class |
| 1456357_at   | Scai    | suppressor of cancer cell invasion                                    | No Class |
| 1445081_at   | Scai    | suppressor of cancer cell invasion                                    | No Class |
| 1458308_at   | Sbno2   | strawberry notch homolog 2 (Drosophila)                               | No Class |
| 1443721_x_at | Sbno2   | strawberry notch homolog 2 (Drosophila)                               | No Class |
| 1439349_at   | Sbno2   | strawberry notch homolog 2 (Drosophila)                               | No Class |
| 1457509_at   | Sbno1   | sno, strawberry notch homolog 1 (Drosophila)                          | No Class |
| 1434612_s_at | Sbno1   | sno, strawberry notch homolog 1 (Drosophila)                          | No Class |
| 1451190_a_at | Sbk1    | SH3-binding kinase 1                                                  | No Class |



|              |         |                                                                            |          |
|--------------|---------|----------------------------------------------------------------------------|----------|
| 1423978_at   | Sbk1    | SH3-binding kinase 1                                                       | No Class |
| 1425904_at   | Satb2   | special AT-rich sequence binding protein 2                                 | No Class |
| 1439449_at   | Satb1   | special AT-rich sequence binding protein 1                                 | No Class |
| 1436182_at   | Satb1   | special AT-rich sequence binding protein 1                                 | No Class |
| 1416008_at   | Satb1   | special AT-rich sequence binding protein 1                                 | No Class |
| 1420502_at   | Sat1    | spermidine/spermine N1-acetyl transferase 1                                | No Class |
| 1452000_s_at | Sars    | seryl-aminoacyl-tRNA synthetase                                            | No Class |
| 1426257_a_at | Sars    | seryl-aminoacyl-tRNA synthetase                                            | No Class |
| 1448426_at   | Sardh   | sarcosine dehydrogenase                                                    | No Class |
| 1416662_at   | Sardh   | sarcosine dehydrogenase                                                    | No Class |
| 1428163_at   | Sar1b   | SAR1 gene homolog B ( <i>S. cerevisiae</i> )                               | No Class |
| 1423720_a_at | Sar1a   | SAR1 gene homolog A ( <i>S. cerevisiae</i> )                               | No Class |
| 1420273_x_at | Samhd1  | SAM domain and HD domain, 1                                                | No Class |
| 1420272_at   | Samhd1  | SAM domain and HD domain, 1                                                | No Class |
| 1460603_at   | Samd9l  | sterile alpha motif domain containing 9-like                               | No Class |
| 1437887_at   | Samd5   | sterile alpha motif domain containing 5                                    | No Class |
| 1454382_at   | Samd4   | sterile alpha motif domain containing 4                                    | No Class |
| 1436356_at   | Samd4   | sterile alpha motif domain containing 4                                    | No Class |
| 1429449_at   | Samd4   | sterile alpha motif domain containing 4                                    | No Class |
| 1456977_at   | Samd11  | Sterile alpha motif domain containing 11                                   | No Class |
| 1437983_at   | Sall1   | sal-like 1 ( <i>Drosophila</i> )                                           | No Class |
| 1430021_a_at | Sae1    | SUMO1 activating enzyme subunit 1                                          | No Class |
| 1416443_a_at | Sae1    | SUMO1 activating enzyme subunit 1                                          | No Class |
| 1460661_at   | S1pr3   | sphingosine-1-phosphate receptor 3                                         | No Class |
| 1438658_a_at | S1pr3   | sphingosine-1-phosphate receptor 3                                         | No Class |
| 1437173_at   | S1pr3   | sphingosine-1-phosphate receptor 3                                         | No Class |
| 1428176_at   | S1pr2   | sphingosine-1-phosphate receptor 2                                         | No Class |
| 1434342_at   | S100b   | S100 protein, beta polypeptide, neural                                     | No Class |
| 1419814_s_at | S100a1  | S100 calcium binding protein A1                                            | No Class |
| 1417421_at   | S100a1  | S100 calcium binding protein A1                                            | No Class |
| 1445760_at   | Rya3    | antimicrobial peptide RYA3                                                 | No Class |
| 1427913_at   | Rwdd1   | RWD domain containing 1                                                    | No Class |
| 1422482_at   | Ruvb12  | RuvB-like protein 2                                                        | No Class |
| 1416585_at   | Ruvb11  | RuvB-like protein 1                                                        | No Class |
| 1426792_s_at | Rusc2   | RUN and SH3 domain containing 2                                            | No Class |
| 1426791_at   | Rusc2   | RUN and SH3 domain containing 2                                            | No Class |
| 1448785_at   | Runx1t1 | runt-related transcription factor 1; translocated to, 1 (cyclin D-related) | No Class |
| 1427640_a_at | Runx1t1 | runt-related transcription factor 1; translocated to, 1 (cyclin D-related) | No Class |
| 1431919_at   | Rtttn   | rotatin                                                                    | No Class |
| 1418580_at   | Rtp4    | receptor transporter protein 4                                             | No Class |
| 1452649_at   | Rtn4    | reticulin 4                                                                | No Class |
| 1421116_a_at | Rtn4    | reticulin 4                                                                | No Class |
| 1419056_at   | Rtn2    | reticulin 2 (Z-band associated protein)                                    | No Class |
| 1418108_at   | Rtkn2   | rhotekin 2                                                                 | No Class |
| 1451603_at   | Rtbdn   | retbindin                                                                  | No Class |
| 1419259_at   | Rsu1    | Ras suppressor protein 1                                                   | No Class |
| 1459958_at   | Rsrc1   | arginine/serine-rich coiled-coil 1                                         | No Class |
| 1424763_at   | Rsph9   | radial spoke head 9 homolog ( <i>Chlamydomonas</i> )                       | No Class |
| 1450233_a_at | Rsph6a  | radial spoke head 6 homolog A ( <i>Chlamydomonas</i> )                     | No Class |
| 1424377_at   | Rsl24d1 | ribosomal L24 domain containing 1                                          | No Class |
| 1456865_x_at | Rrs1    | RRS1 ribosome biogenesis regulator homolog ( <i>S. cerevisiae</i> )        | No Class |
| 1448141_at   | Rrp7a   | ribosomal RNA processing 7 homolog A ( <i>S. cerevisiae</i> )              | No Class |
| 1456117_at   | Rrp1b   | ribosomal RNA processing 1 homolog B ( <i>S. cerevisiae</i> )              | No Class |
| 1415957_a_at | Rrp1    | ribosomal RNA processing 1 homolog ( <i>S. cerevisiae</i> )                | No Class |
| 1415725_at   | Rrn3    | RRN3 RNA polymerase I transcription factor homolog (yeast)                 | No Class |
| 1437222_x_at | Rrm2b   | ribonucleotide reductase M2 B (TP53 inducible)                             | No Class |
| 1437221_at   | Rrm2b   | ribonucleotide reductase M2 B (TP53 inducible)                             | No Class |

|              |                   |                                                                                       |          |
|--------------|-------------------|---------------------------------------------------------------------------------------|----------|
| 1433773_at   | Rrm2b             | ribonucleotide reductase M2 B (TP53 inducible)                                        | No Class |
| 1448226_at   | Rrm2              | ribonucleotide reductase M2                                                           | No Class |
| 1434437_x_at | Rrm2              | ribonucleotide reductase M2                                                           | No Class |
| 1416120_at   | Rrm2              | ribonucleotide reductase M2                                                           | No Class |
| 1428905_at   | Rraga             | Ras-related GTP binding A                                                             | No Class |
| 1450887_at   | Rqcd1             | rcd1 (required for cell differentiation) homolog 1 (S. pombe)                         | No Class |
| 1442783_x_at | Rpusd2            | RNA pseudouridylate synthase domain containing 2                                      | No Class |
| 1439960_at   | Rpusd2            | RNA pseudouridylate synthase domain containing 2                                      | No Class |
| 1457562_at   | Rps6kb1           | ribosomal protein S6 kinase, polypeptide 1                                            | No Class |
| 1417542_at   | Rps6ka2           | ribosomal protein S6 kinase, polypeptide 2                                            | No Class |
| 1450925_a_at | Rps27l            | ribosomal protein S27-like                                                            | No Class |
| 1435429_x_at | Rps27l            | ribosomal protein S27-like                                                            | No Class |
| 1423254_x_at | Rps27l            | ribosomal protein S27-like                                                            | No Class |
| 1455174_at   | Rps19bp1          | ribosomal protein S19 binding protein 1                                               | No Class |
| 1455572_x_at | Rps18             | ribosomal protein S18                                                                 | No Class |
| 1423373_at   | Rpp30             | ribonuclease P/MRP 30 subunit (human)                                                 | No Class |
| 1418896_a_at | Rpn2              | ribophorin II                                                                         | No Class |
| 1456438_x_at | Rpn1              | ribophorin I                                                                          | No Class |
| 1448353_x_at | Rpn1              | ribophorin I                                                                          | No Class |
| 1439257_x_at | Rpn1              | ribophorin I                                                                          | No Class |
| 1438943_x_at | Rpn1              | ribophorin I                                                                          | No Class |
| 1416470_a_at | Rpn1              | ribophorin I                                                                          | No Class |
| 1443843_x_at | Rpl9              | Ribosomal protein L9                                                                  | No Class |
| 1452049_at   | Rpl7l1            | ribosomal protein L7-like 1                                                           | No Class |
| 1426386_at   | Rpl7l1            | ribosomal protein L7-like 1                                                           | No Class |
| 1454639_x_at | Rpl41             | ribosomal protein L41                                                                 | No Class |
| 1433530_at   | Rpl41             | ribosomal protein L41                                                                 | No Class |
| 1416218_x_at | Rpl37a            | ribosomal protein L37a                                                                | No Class |
| 1420381_a_at | Rpl31             | ribosomal protein L31                                                                 | No Class |
| 1454859_a_at | Rpl23             | ribosomal protein L23                                                                 | No Class |
| 1423070_at   | Rpl21             | ribosomal protein L21                                                                 | No Class |
| 1455871_s_at | Rpl13 /// Tax1bp3 | ribosomal protein L13 /// Tax1 (human T-cell leukemia virus type I) binding protein 3 | No Class |
| 1444409_at   | Rph3al            | rabphilin 3A-like (without C2 domains)                                                | No Class |
| 1431357_a_at | Rpgrip1           | retinitis pigmentosa GTPase regulator interacting protein 1                           | No Class |
| 1450423_s_at | Rpf2              | ribosome production factor 2 homolog (S. cerevisiae)                                  | No Class |
| 1425884_at   | Rpf2              | ribosome production factor 2 homolog (S. cerevisiae)                                  | No Class |
| 1421945_a_at | Rpf2              | ribosome production factor 2 homolog (S. cerevisiae)                                  | No Class |
| 1426890_a_at | Rpap1             | RNA polymerase II associated protein 1                                                | No Class |
| 1441814_s_at | Rpain             | RPA interacting protein                                                               | No Class |
| 1416433_at   | Rpa2              | replication protein A2                                                                | No Class |
| 1437309_a_at | Rpa1              | replication protein A1                                                                | No Class |
| 1419587_s_at | Rp2h              | retinitis pigmentosa 2 homolog (human)                                                | No Class |
| 1419586_at   | Rp2h              | retinitis pigmentosa 2 homolog (human)                                                | No Class |
| 1419585_at   | Rp2h              | retinitis pigmentosa 2 homolog (human)                                                | No Class |
| 1441085_at   | Rora              | RAR-related orphan receptor alpha                                                     | No Class |
| 1460729_at   | Rock1             | Rho-associated coiled-coil containing protein kinase 1                                | No Class |
| 1450994_at   | Rock1             | Rho-associated coiled-coil containing protein kinase 1                                | No Class |
| 1441162_at   | Rock1             | Rho-associated coiled-coil containing protein kinase 1                                | No Class |
| 1423444_at   | Rock1             | Rho-associated coiled-coil containing protein kinase 1                                | No Class |
| 1458229_at   | Robo2             | roundabout homolog 2 (Drosophila)                                                     | No Class |
| 1438267_x_at | Rnps1             | ribonucleic acid binding protein S1                                                   | No Class |
| 1437851_x_at | Rnps1             | ribonucleic acid binding protein S1                                                   | No Class |
| 1437027_x_at | Rnps1             | ribonucleic acid binding protein S1                                                   | No Class |
| 1437461_s_at | Rnpc3             | RNA-binding region (RNP1, RRM) containing 3                                           | No Class |
| 1428766_at   | Rnmt1             | RNA methyltransferase like 1                                                          | No Class |
| 1440002_at   | Rnmt              | RNA (guanine-7-) methyltransferase                                                    | No Class |
| 1425844_a_at | Rngtt             | RNA guanylyltransferase and 5'-phosphatase                                            | No Class |

|              |          |                                                                   |          |
|--------------|----------|-------------------------------------------------------------------|----------|
| 1422888_at   | Rnf5     | ring finger protein 5                                             | No Class |
| 1432156_a_at | Rnf32    | ring finger protein 32                                            | No Class |
| 1455051_at   | Rnf31    | ring finger protein 31                                            | No Class |
| 1448674_at   | Rnf25    | ring finger protein 25                                            | No Class |
| 1428498_at   | Rnf219   | ring finger protein 219                                           | No Class |
| 1460018_at   | Rnf213   | Ring finger protein 213                                           | No Class |
| 1438306_at   | Rnf180   | ring finger protein 180                                           | No Class |
| 1430527_a_at | Rnf167   | ring finger protein 167                                           | No Class |
| 1436906_at   | Rnf166   | ring finger protein 166                                           | No Class |
| 1436114_at   | Rnf165   | ring finger protein 165                                           | No Class |
| 1429886_at   | Rnf160   | ring finger protein 160                                           | No Class |
| 1439887_at   | Rnf152   | ring finger protein 152                                           | No Class |
| 1439153_at   | Rnf144b  | ring finger protein 144B                                          | No Class |
| 1425282_at   | Rnf144b  | ring finger protein 144B                                          | No Class |
| 1425929_a_at | Rnf14    | ring finger protein 14                                            | No Class |
| 1422429_at   | Rnf14    | ring finger protein 14                                            | No Class |
| 1429426_at   | Rnf139   | ring finger protein 139                                           | No Class |
| 1451074_at   | Rnf13    | ring finger protein 13                                            | No Class |
| 1420620_a_at | Rnf13    | ring finger protein 13                                            | No Class |
| 1449036_at   | Rnf128   | ring finger protein 128                                           | No Class |
| 1418318_at   | Rnf128   | ring finger protein 128                                           | No Class |
| 1454857_at   | Rnf122   | ring finger protein 122                                           | No Class |
| 1427874_at   | Rnf114   | ring finger protein 114                                           | No Class |
| 1422959_s_at | Rnf114   | ring finger protein 114                                           | No Class |
| 1448434_at   | Rnf103   | ring finger protein 103                                           | No Class |
| 1442414_at   | Rnf103   | Ring finger protein 103                                           | No Class |
| 1456689_at   | Rnf10    | ring finger protein 10                                            | No Class |
| 1416701_at   | Rnd3     | Rho family GTPase 3                                               | No Class |
| 1416700_at   | Rnd3     | Rho family GTPase 3                                               | No Class |
| 1446458_at   | Rnasel   | ribonuclease L (2 , 5 -oligoadenylate synthetase-dependent)       | No Class |
| 1426603_at   | Rnasel   | ribonuclease L (2 , 5 -oligoadenylate synthetase-dependent)       | No Class |
| 1439453_x_at | Rnaseh2c | ribonuclease H2, subunit C                                        | No Class |
| 1435733_x_at | Rnaseh2c | ribonuclease H2, subunit C                                        | No Class |
| 1430534_at   | Rnase6   | ribonuclease, RNase A family, 6                                   | No Class |
| 1438822_at   | Rmst     | rhabdomyosarcoma 2 associated transcript (non-coding RNA)         | No Class |
| 1456696_x_at | Rmi1     | RMI1, RecQ mediated genome instability 1, homolog (S. cerevisiae) | No Class |
| 1439248_at   | Rmi1     | RMI1, RecQ mediated genome instability 1, homolog (S. cerevisiae) | No Class |
| 1440850_at   | Rlim     | ring finger protein, LIM domain interacting                       | No Class |
| 1418488_s_at | Ripk4    | receptor-interacting serine-threonine kinase 4                    | No Class |
| 1418487_at   | Ripk4    | receptor-interacting serine-threonine kinase 4                    | No Class |
| 1450173_at   | Ripk2    | receptor (TNFRSF)-interacting serine-threonine kinase 2           | No Class |
| 1421236_at   | Ripk2    | receptor (TNFRSF)-interacting serine-threonine kinase 2           | No Class |
| 1440893_at   | Riok1    | RIO kinase 1 (yeast)                                              | No Class |
| 1444197_at   | Rinl     | Ras and Rab interactor-like                                       | No Class |
| 1431100_at   | Rinl     | Ras and Rab interactor-like                                       | No Class |
| 1437460_x_at | Rin1     | Ras and Rab interactor 1                                          | No Class |
| 1424507_at   | Rin1     | Ras and Rab interactor 1                                          | No Class |
| 1438516_at   | Rif1     | Rap1 interacting factor 1 homolog (yeast)                         | No Class |
| 1429491_s_at | Rif1     | Rap1 interacting factor 1 homolog (yeast)                         | No Class |
| 1429490_at   | Rif1     | Rap1 interacting factor 1 homolog (yeast)                         | No Class |
| 1455809_x_at | Ric8     | resistance to inhibitors of cholinesterase 8 homolog (C. elegans) | No Class |
| 1450789_at   | Rhpn1    | rhopilin, Rho GTPase binding protein 1                            | No Class |
| 1419018_at   | Rhox6    | reproductive homeobox 6                                           | No Class |
| 1440853_at   | Rhot1    | ras homolog gene family, member T1                                | No Class |
| 1423533_a_at | Rhot1    | ras homolog gene family, member T1                                | No Class |
| 1418892_at   | Rhoj     | ras homolog gene family, member J                                 | No Class |
| 1443015_at   | Rhoh     | Ras homolog gene family, member H                                 | No Class |

|              |         |                                                                                |          |
|--------------|---------|--------------------------------------------------------------------------------|----------|
| 1429319_at   | Rhoh    | ras homolog gene family, member H                                              | No Class |
| 1453227_at   | Rhobtb3 | Rho-related BTB domain containing 3                                            | No Class |
| 1433647_s_at | Rhobtb3 | Rho-related BTB domain containing 3                                            | No Class |
| 1435674_at   | Rhobtb2 | Rho-related BTB domain containing 2                                            | No Class |
| 1437628_s_at | Rhoa    | ras homolog gene family, member A                                              | No Class |
| 1445233_at   | Rhbdl2  | rhomboid, veinlet-like 2 (Drosophila)                                          | No Class |
| 1440618_at   | Rhbdl2  | rhomboid, veinlet-like 2 (Drosophila)                                          | No Class |
| 1437559_at   | Rgs7bp  | regulator of G-protein signalling 7 binding protein                            | No Class |
| 1448285_at   | Rgs4    | regulator of G-protein signaling 4                                             | No Class |
| 1447830_s_at | Rgs2    | regulator of G-protein signaling 2                                             | No Class |
| 1419248_at   | Rgs2    | regulator of G-protein signaling 2                                             | No Class |
| 1419247_at   | Rgs2    | regulator of G-protein signaling 2                                             | No Class |
| 1419457_at   | Rgnef   | Rho-guanine nucleotide exchange factor                                         | No Class |
| 1433587_at   | Rgmb    | RGM domain family, member B                                                    | No Class |
| 1433586_at   | Rgmb    | RGM domain family, member B                                                    | No Class |
| 1428430_at   | Rgmb    | RGM domain family, member B                                                    | No Class |
| 1428429_at   | Rgmb    | RGM domain family, member B                                                    | No Class |
| 1447781_s_at | Rg9mtd2 | RNA (guanine-9-) methyltransferase domain containing 2                         | No Class |
| 1427375_at   | Rg9mtd2 | RNA (guanine-9-) methyltransferase domain containing 2                         | No Class |
| 1460567_at   | Rfx7    | regulatory factor X, 7                                                         | No Class |
| 1434521_at   | Rfx7    | regulatory factor X, 7                                                         | No Class |
| 1423103_at   | Rfx5    | regulatory factor X, 5 (influences HLA class II expression)                    | No Class |
| 1452946_a_at | Rftn2   | raftlin family member 2                                                        | No Class |
| 1434432_at   | Rffl    | ring finger and FYVE like domain containing protein                            | No Class |
| 1438161_s_at | Rfc4    | replication factor C (activator 1) 4                                           | No Class |
| 1457669_x_at | Rfc2    | replication factor C (activator 1) 2                                           | No Class |
| 1457638_x_at | Rfc2    | replication factor C (activator 1) 2                                           | No Class |
| 1417503_at   | Rfc2    | replication factor C (activator 1) 2                                           | No Class |
| 1418342_at   | Rfc1    | replication factor C (activator 1) 1                                           | No Class |
| 1424632_a_at | Rev3l   | REV3-like, catalytic subunit of DNA polymerase zeta RAD54 like (S. cerevisiae) | No Class |
| 1428227_at   | Rest    | RE1-silencing transcription factor                                             | No Class |
| 1425565_at   | Rest    | RE1-silencing transcription factor                                             | No Class |
| 1425564_at   | Rest    | RE1-silencing transcription factor                                             | No Class |
| 1451236_at   | Rerg    | RAS-like, estrogen-regulated, growth-inhibitor                                 | No Class |
| 1420328_at   | Rep15   | RAB15 effector protein                                                         | No Class |
| 1420710_at   | Rel     | reticuloendotheliosis oncogene                                                 | No Class |
| 1448872_at   | Reg3g   | regenerating islet-derived 3 gamma                                             | No Class |
| 1448290_at   | Reg3b   | regenerating islet-derived 3 beta                                              | No Class |
| 1416297_s_at | Reg3b   | regenerating islet-derived 3 beta                                              | No Class |
| 1415905_at   | Reg1    | regenerating islet-derived 1                                                   | No Class |
| 1439047_s_at | Recql   | RecQ protein-like                                                              | No Class |
| 1418339_at   | Recql   | RecQ protein-like                                                              | No Class |
| 1416180_a_at | Rdx     | radixin                                                                        | No Class |
| 1418808_at   | Rdh5    | retinol dehydrogenase 5                                                        | No Class |
| 1457019_s_at | Rdh14   | retinol dehydrogenase 14 (all-trans and 9-cis)                                 | No Class |
| 1453864_at   | Rdh14   | retinol dehydrogenase 14 (all-trans and 9-cis)                                 | No Class |
| 1431010_a_at | Rdh12   | retinol dehydrogenase 12                                                       | No Class |
| 1424256_at   | Rdh12   | retinol dehydrogenase 12                                                       | No Class |
| 1449209_a_at | Rdh11   | retinol dehydrogenase 11                                                       | No Class |
| 1418760_at   | Rdh11   | retinol dehydrogenase 11                                                       | No Class |
| 1444431_at   | Rcsd1   | RCS domain containing 1                                                        | No Class |
| 1417302_at   | Rcor2   | REST corepressor 2                                                             | No Class |
| 1417090_at   | Rcn1    | reticulocalbin 1                                                               | No Class |
| 1450243_a_at | Rcan2   | regulator of calcineurin 2                                                     | No Class |
| 1421425_a_at | Rcan2   | regulator of calcineurin 2                                                     | No Class |
| 1420143_at   | Rc3h2   | ring finger and CCCH-type zinc finger domains 2                                | No Class |
| 1424008_a_at | Rbpms2  | RNA binding protein with multiple splicing 2                                   | No Class |

|              |          |                                                                        |          |
|--------------|----------|------------------------------------------------------------------------|----------|
| 1454896_at   | Rbpj     | recombination signal binding protein for immunoglobulin kappa J region | No Class |
| 1448957_at   | Rbpj     | recombination signal binding protein for immunoglobulin kappa J region | No Class |
| 1418114_at   | Rbpj     | recombination signal binding protein for immunoglobulin kappa J region | No Class |
| 1449461_at   | Rbp7     | retinol binding protein 7, cellular                                    | No Class |
| 1426863_at   | Rbmx     | RNA binding motif protein, X chromosome                                | No Class |
| 1434005_at   | Rbms1    | RNA binding motif, single stranded interacting protein 1               | No Class |
| 1418703_at   | Rbms1    | RNA binding motif, single stranded interacting protein 1               | No Class |
| 1418245_a_at | Rbm9     | RNA binding motif protein 9                                            | No Class |
| 1440223_at   | Rbm6     | RNA binding motif protein 6                                            | No Class |
| 1417213_a_at | Rbm6     | RNA binding motif protein 6                                            | No Class |
| 1456262_at   | Rbm5     | RNA binding motif protein 5                                            | No Class |
| 1441319_at   | Rbm5     | RNA binding motif protein 5                                            | No Class |
| 1438069_a_at | Rbm5     | RNA binding motif protein 5                                            | No Class |
| 1446148_x_at | Rbm39    | RNA binding motif protein 39                                           | No Class |
| 1446147_at   | Rbm39    | RNA binding motif protein 39                                           | No Class |
| 1442745_x_at | Rbm39    | RNA binding motif protein 39                                           | No Class |
| 1442744_at   | Rbm39    | RNA binding motif protein 39                                           | No Class |
| 1429587_at   | Rbm34    | RNA binding motif protein 34                                           | No Class |
| 1435391_at   | Rbm33    | RNA binding motif protein 33                                           | No Class |
| 1428908_at   | Rbm25    | RNA binding motif protein 25                                           | No Class |
| 1425522_at   | Rbm25    | RNA binding motif protein 25                                           | No Class |
| 1420607_at   | Rbm18    | RNA binding motif protein 18                                           | No Class |
| 1452691_at   | Rbm17    | RNA binding motif protein 17                                           | No Class |
| 1456566_x_at | Rbm14    | RNA binding motif protein 14                                           | No Class |
| 1452003_at   | Rbm14    | RNA binding motif protein 14                                           | No Class |
| 1437032_x_at | Rbm14    | RNA binding motif protein 14                                           | No Class |
| 1436979_x_at | Rbm14    | RNA binding motif protein 14                                           | No Class |
| 1416929_at   | Rbm12    | RNA binding motif protein 12                                           | No Class |
| 1423742_at   | Rbm10    | RNA binding motif protein 10                                           | No Class |
| 1423740_a_at | Rbm10    | RNA binding motif protein 10                                           | No Class |
| 1425981_a_at | Rbl2     | retinoblastoma-like 2                                                  | No Class |
| 1418146_a_at | Rbl2     | retinoblastoma-like 2                                                  | No Class |
| 1416174_at   | Rbbp9    | retinoblastoma binding protein 9                                       | No Class |
| 1456227_x_at | Rbbp7    | retinoblastoma binding protein 7                                       | No Class |
| 1415775_at   | Rbbp7    | retinoblastoma binding protein 7                                       | No Class |
| 1456260_at   | Rbbp4    | retinoblastoma binding protein 4                                       | No Class |
| 1444400_at   | Rb1      | retinoblastoma 1                                                       | No Class |
| 1427110_at   | Raver1   | ribonucleoprotein, PTB-binding 1                                       | No Class |
| 1429262_at   | Rassf6   | Ras association (RalGDS/AF-6) domain family member 6                   | No Class |
| 1422638_s_at | Rassf5   | Ras association (RalGDS/AF-6) domain family member 5                   | No Class |
| 1422637_at   | Rassf5   | Ras association (RalGDS/AF-6) domain family member 5                   | No Class |
| 1439622_at   | Rassf4   | Ras association (RalGDS/AF-6) domain family member 4                   | No Class |
| 1431038_at   | Rassf4   | Ras association (RalGDS/AF-6) domain family member 4                   | No Class |
| 1457140_s_at | Rassf10  | Ras association (RalGDS/AF-6) domain family (N-terminal) member 10     | No Class |
| 1438031_at   | Rasgrp3  | RAS, guanyl releasing protein 3                                        | No Class |
| 1438030_at   | Rasgrp3  | RAS, guanyl releasing protein 3                                        | No Class |
| 1417804_at   | Rasgrp2  | RAS, guanyl releasing protein 2                                        | No Class |
| 1450143_at   | Rasgrp1  | RAS guanyl releasing protein 1                                         | No Class |
| 1434295_at   | Rasgrp1  | RAS guanyl releasing protein 1                                         | No Class |
| 1421176_at   | Rasgrp1  | RAS guanyl releasing protein 1                                         | No Class |
| 1458591_at   | Rasef    | RAS and EF hand domain containing                                      | No Class |
| 1427344_s_at | Rasd2    | RASD family, member 2                                                  | No Class |
| 1437902_s_at | Rarres2  | retinoic acid receptor responder (tazarotene induced) 2                | No Class |
| 1428538_s_at | Rarres2  | retinoic acid receptor responder (tazarotene induced) 2                | No Class |
| 1419416_a_at | Rarg     | retinoic acid receptor, gamma                                          | No Class |
| 1419415_a_at | Rarg     | retinoic acid receptor, gamma                                          | No Class |
| 1438828_at   | Rapegef6 | Rap guanine nucleotide exchange factor (GEF) 6                         | No Class |

|              |          |                                                              |          |
|--------------|----------|--------------------------------------------------------------|----------|
| 1425518_at   | Rapgef4  | Rap guanine nucleotide exchange factor (GEF) 4               | No Class |
| 1437012_x_at | Rapgef3  | Rap guanine nucleotide exchange factor (GEF) 3               | No Class |
| 1424470_a_at | Rapgef3  | Rap guanine nucleotide exchange factor (GEF) 3               | No Class |
| 1448885_at   | Rap2b    | RAP2B, member of RAS oncogene family                         | No Class |
| 1439548_at   | Rap2b    | RAP2B, member of RAS oncogene family                         | No Class |
| 1443921_at   | Ranbp3l  | RAN binding protein 3-like                                   | No Class |
| 1440104_at   | Ranbp2   | RAN binding protein 2                                        | No Class |
| 1424584_a_at | Ranbp10  | RAN binding protein 10                                       | No Class |
| 1431704_a_at | Ralgps2  | Ral GEF with PH domain and SH3 binding motif 2               | No Class |
| 1428789_at   | Ralgps2  | Ral GEF with PH domain and SH3 binding motif 2               | No Class |
| 1431391_at   | Ralgps1  | Ral GEF with PH domain and SH3 binding motif 1               | No Class |
| 1421448_at   | Ralgapa1 | Ral GTPase activating protein, alpha subunit 1               | No Class |
| 1435517_x_at | Ralb     | v-ral simian leukemia viral oncogene homolog B (ras related) | No Class |
| 1417744_a_at | Ralb     | v-ral simian leukemia viral oncogene homolog B (ras related) | No Class |
| 1450680_at   | Rag1     | recombination activating gene 1                              | No Class |
| 1423124_x_at | Rad54l   | RAD54 like (S. cerevisiae)                                   | No Class |
| 1423123_at   | Rad54l   | RAD54 like (S. cerevisiae)                                   | No Class |
| 1443891_at   | Rad51l3  | RAD51-like 3 (S. cerevisiae)                                 | No Class |
| 1448899_s_at | Rad51ap1 | RAD51 associated protein 1                                   | No Class |
| 1417939_at   | Rad51ap1 | RAD51 associated protein 1                                   | No Class |
| 1417938_at   | Rad51ap1 | RAD51 associated protein 1                                   | No Class |
| 1418281_at   | Rad51    | RAD51 homolog (S. cerevisiae)                                | No Class |
| 1455391_at   | Rad23a   | RAD23a homolog (S. cerevisiae)                               | No Class |
| 1422964_at   | Rad23a   | RAD23a homolog (S. cerevisiae)                               | No Class |
| 1451928_a_at | Rad18    | RAD18 homolog (S. cerevisiae)                                | No Class |
| 1423318_at   | Rad18    | RAD18 homolog (S. cerevisiae)                                | No Class |
| 1451358_a_at | Racgap1  | Rac GTPase-activating protein 1                              | No Class |
| 1421546_a_at | Racgap1  | Rac GTPase-activating protein 1                              | No Class |
| 1423734_at   | Rac1     | RAS-related C3 botulinum substrate 1                         | No Class |
| 1431082_a_at | Rabl3    | RAB, member of RAS oncogene family-like 3                    | No Class |
| 1419069_at   | Rabgef1  | RAB guanine nucleotide exchange factor (GEF) 1               | No Class |
| 1419068_at   | Rabgef1  | RAB guanine nucleotide exchange factor (GEF) 1               | No Class |
| 1429197_s_at | Rabgap1l | RAB GTPase activating protein 1-like                         | No Class |
| 1429196_at   | Rabgap1l | RAB GTPase activating protein 1-like                         | No Class |
| 1460486_at   | Rabgap1  | RAB GTPase activating protein 1                              | No Class |
| 1451487_at   | Rabepk   | Rab9 effector protein with kelch motifs                      | No Class |
| 1426023_a_at | Rabep1   | rabaptin, RAB GTPase binding effector protein 1              | No Class |
| 1421305_x_at | Rabep1   | rabaptin, RAB GTPase binding effector protein 1              | No Class |
| 1436566_at   | Rab40b   | Rab40b, member RAS oncogene family                           | No Class |
| 1456442_at   | Rab3il1  | RAB3A interacting protein (rabin3)-like 1                    | No Class |
| 1428391_at   | Rab3il1  | RAB3A interacting protein (rabin3)-like 1                    | No Class |
| 1425133_s_at | Rab3il1  | RAB3A interacting protein (rabin3)-like 1                    | No Class |
| 1437762_at   | Rab39    | RAB39, member RAS oncogene family                            | No Class |
| 1439628_x_at | Rab38    | RAB38, member of RAS oncogene family                         | No Class |
| 1431691_a_at | Rab31    | RAB31, member RAS oncogene family                            | No Class |
| 1426452_a_at | Rab30    | RAB30, member RAS oncogene family                            | No Class |
| 1455857_a_at | Rab2b    | RAB2B, member RAS oncogene family                            | No Class |
| 1452668_x_at | Rab2b    | RAB2B, member RAS oncogene family                            | No Class |
| 1436923_at   | Rab2b    | RAB2B, member RAS oncogene family                            | No Class |
| 1428115_a_at | Rab2b    | RAB2B, member RAS oncogene family                            | No Class |
| 1419945_s_at | Rab2a    | RAB2A, member RAS oncogene family                            | No Class |
| 1418622_at   | Rab2a    | RAB2A, member RAS oncogene family                            | No Class |
| 1439610_at   | Rab27b   | RAB27b, member RAS oncogene family                           | No Class |
| 1417214_at   | Rab27b   | RAB27b, member RAS oncogene family                           | No Class |
| 1454876_at   | Rab23    | RAB23, member RAS oncogene family                            | No Class |
| 1420900_a_at | Rab18    | RAB18, member RAS oncogene family                            | No Class |
| 1417829_a_at | Rab15    | RAB15, member RAS oncogene family                            | No Class |

|              |           |                                                                               |          |
|--------------|-----------|-------------------------------------------------------------------------------|----------|
| 1441992_at   | Rab14     | RAB14, member RAS oncogene family                                             | No Class |
| 1439687_at   | Rab14     | RAB14, member RAS oncogene family                                             | No Class |
| 1424894_at   | Rab13     | RAB13, member RAS oncogene family                                             | No Class |
| 1457783_at   | Rab12     | RAB12, member RAS oncogene family                                             | No Class |
| 1427992_a_at | Rab12     | RAB12, member RAS oncogene family                                             | No Class |
| 1443766_x_at | Rab11fip4 | RAB11 family interacting protein 4 (class II)                                 | No Class |
| 1429296_at   | Rab10     | RAB10, member RAS oncogene family                                             | No Class |
| 1457537_at   | Rab1      | RAB1, member RAS oncogene family                                              | No Class |
| 1457336_at   | R3hdm1    | R3H domain 1 (binds single-stranded nucleic acids)                            | No Class |
| 1450630_at   | Qtrt1     | queuine tRNA-ribosyltransferase 1                                             | No Class |
| 1426289_at   | Qrich1    | glutamine-rich 1                                                              | No Class |
| 1449518_at   | Qpctl     | glutaminyl-peptide cyclotransferase-like                                      | No Class |
| 1449517_at   | Qpctl     | glutaminyl-peptide cyclotransferase-like                                      | No Class |
| 1429736_at   | Qk        | quaking                                                                       | No Class |
| 1425597_a_at | Qk        | quaking                                                                       | No Class |
| 1417073_a_at | Qk        | quaking                                                                       | No Class |
| 1417246_at   | Pzp       | pregnancy zone protein                                                        | No Class |
| 1433504_at   | Pygb      | brain glycogen phosphorylase                                                  | No Class |
| 1448315_a_at | Pycr2     | pyrroline-5-carboxylate reductase family, member 2                            | No Class |
| 1451253_at   | Pxk       | PX domain containing serine/threonine kinase                                  | No Class |
| 1444379_at   | Pwvp2b    | PWWP domain containing 2B                                                     | No Class |
| 1424193_at   | Pwp2      | PWP2 periodic tryptophan protein homolog (yeast)                              | No Class |
| 1417873_at   | Pwp1      | PWP1 homolog ( <i>S. cerevisiae</i> )                                         | No Class |
| 1451690_a_at | Pvrl4     | poliovirus receptor-related 4                                                 | No Class |
| 1457257_x_at | Pvrl3     | poliovirus receptor-related 3                                                 | No Class |
| 1417319_at   | Pvrl3     | poliovirus receptor-related 3                                                 | No Class |
| 1451160_s_at | Pvr       | poliovirus receptor                                                           | No Class |
| 1450295_s_at | Pvr       | poliovirus receptor                                                           | No Class |
| 1445149_at   | Pvr       | Poliovirus receptor                                                           | No Class |
| 1423905_at   | Pvr       | poliovirus receptor                                                           | No Class |
| 1423904_a_at | Pvr       | poliovirus receptor                                                           | No Class |
| 1423903_at   | Pvr       | poliovirus receptor                                                           | No Class |
| 1460447_at   | Pus7l     | pseudouridylate synthase 7 homolog ( <i>S. cerevisiae</i> )-like              | No Class |
| 1428800_a_at | Pus7l     | pseudouridylate synthase 7 homolog ( <i>S. cerevisiae</i> )-like              | No Class |
| 1418869_a_at | Pus1      | pseudouridine synthase 1                                                      | No Class |
| 1441448_at   | Pum2      | Pumilio 2 ( <i>Drosophila</i> )                                               | No Class |
| 1418016_at   | Pum2      | pumilio 2 ( <i>Drosophila</i> )                                               | No Class |
| 1416438_at   | Puf60     | poly-U binding splicing factor 60                                             | No Class |
| 1437342_x_at | Pttg1ip   | pituitary tumor-transforming 1 interacting protein                            | No Class |
| 1451845_a_at | Ptrh2     | peptidyl-tRNA hydrolase 2                                                     | No Class |
| 1425863_a_at | Ptpro     | protein tyrosine phosphatase, receptor type, O                                | No Class |
| 1444763_at   | Ptprk     | protein tyrosine phosphatase, receptor type, K                                | No Class |
| 1423278_at   | Ptprk     | protein tyrosine phosphatase, receptor type, K                                | No Class |
| 1420841_at   | Ptprf     | protein tyrosine phosphatase, receptor type, F                                | No Class |
| 1435537_at   | Ptprd     | protein tyrosine phosphatase, receptor type, D                                | No Class |
| 1429052_at   | Ptprd     | protein tyrosine phosphatase, receptor type, D                                | No Class |
| 1424886_at   | Ptprd     | protein tyrosine phosphatase, receptor type, D                                | No Class |
| 1448511_at   | Ptprcap   | protein tyrosine phosphatase, receptor type, C polypeptide-associated protein | No Class |
| 1440165_at   | Ptprc     | Protein tyrosine phosphatase, receptor type, C                                | No Class |
| 1422124_a_at | Ptprc     | protein tyrosine phosphatase, receptor type, C                                | No Class |
| 1460188_at   | Ptpn6     | protein tyrosine phosphatase, non-receptor type 6                             | No Class |
| 1456694_x_at | Ptpn6     | protein tyrosine phosphatase, non-receptor type 6                             | No Class |
| 1455359_at   | Ptpn14    | protein tyrosine phosphatase, non-receptor type 14                            | No Class |
| 1455105_at   | Ptpn12    | protein tyrosine phosphatase, non-receptor type 12                            | No Class |
| 1450479_x_at | Ptpn12    | protein tyrosine phosphatase, non-receptor type 12                            | No Class |
| 1422045_a_at | Ptpn12    | protein tyrosine phosphatase, non-receptor type 12                            | No Class |
| 1433823_at   | Ptpdc1    | protein tyrosine phosphatase domain containing 1                              | No Class |

|              |        |                                                                                          |          |
|--------------|--------|------------------------------------------------------------------------------------------|----------|
| 1438058_s_at | Ptov1  | prostate tumor over expressed gene 1                                                     | No Class |
| 1450271_at   | Ptk6   | PTK6 protein tyrosine kinase 6                                                           | No Class |
| 1442923_at   | Ptk6   | PTK6 protein tyrosine kinase 6                                                           | No Class |
| 1434653_at   | Ptk2b  | PTK2 protein tyrosine kinase 2 beta                                                      | No Class |
| 1430827_a_at | Ptk2   | PTK2 protein tyrosine kinase 2                                                           | No Class |
| 1417263_at   | Ptgs2  | prostaglandin-endoperoxide synthase 2                                                    | No Class |
| 1417262_at   | Ptgs2  | prostaglandin-endoperoxide synthase 2                                                    | No Class |
| 1417998_at   | Ptges3 | prostaglandin E synthase 3 (cytosolic)                                                   | No Class |
| 1450655_at   | Pten   | phosphatase and tensin homolog                                                           | No Class |
| 1460010_a_at | Ptdss2 | phosphatidylserine synthase 2                                                            | No Class |
| 1453164_a_at | Ptdss2 | phosphatidylserine synthase 2                                                            | No Class |
| 1450354_a_at | Ptdss2 | phosphatidylserine synthase 2                                                            | No Class |
| 1434587_x_at | Ptdss2 | phosphatidylserine synthase 2                                                            | No Class |
| 1434586_a_at | Ptdss2 | phosphatidylserine synthase 2                                                            | No Class |
| 1429492_x_at | Ptdss2 | phosphatidylserine synthase 2                                                            | No Class |
| 1426728_x_at | Ptdss2 | phosphatidylserine synthase 2                                                            | No Class |
| 1456681_at   | Ptchd1 | patched domain containing 1                                                              | No Class |
| 1445703_at   | Ptchd1 | patched domain containing 1                                                              | No Class |
| 1425096_a_at | Ptcd1  | pentatricopeptide repeat domain 1                                                        | No Class |
| 1450443_at   | Ptbp1  | polypyrimidine tract binding protein 1                                                   | No Class |
| 1425416_s_at | Psrc1  | proline/serine-rich coiled-coil 1                                                        | No Class |
| 1417323_at   | Psrc1  | proline/serine-rich coiled-coil 1                                                        | No Class |
| 1415673_at   | Psph   | phosphoserine phosphatase                                                                | No Class |
| 1448212_at   | Psmg2  | proteasome (prosome, macropain) assembly chaperone 2                                     | No Class |
| 1417189_at   | Psmc2  | proteasome (prosome, macropain) 28 subunit, beta                                         | No Class |
| 1417056_at   | Psmc1  | proteasome (prosome, macropain) 28 subunit, alpha                                        | No Class |
| 1423296_at   | Psmc8  | proteasome (prosome, macropain) 26S subunit, non-ATPase, 8                               | No Class |
| 1415831_at   | Psmc2  | proteasome (prosome, macropain) 26S subunit, non-ATPase, 2                               | No Class |
| 1437220_x_at | Psmc13 | Proteasome (prosome, macropain) 26S subunit, non-ATPase, 13                              | No Class |
| 1422459_a_at | Psmc13 | proteasome (prosome, macropain) 26S subunit, non-ATPase, 13                              | No Class |
| 1417771_a_at | Psmc6  | proteasome (prosome, macropain) 26S subunit, ATPase, 6                                   | No Class |
| 1415740_at   | Psmc5  | protease (prosome, macropain) 26S subunit, ATPase 5                                      | No Class |
| 1416282_at   | Psmc3  | proteasome (prosome, macropain) 26S subunit, ATPase 3                                    | No Class |
| 1416005_at   | Psmc1  | protease (prosome, macropain) 26S subunit, ATPase 1                                      | No Class |
| 1450696_at   | Psmb9  | proteasome (prosome, macropain) subunit, beta type 9 (large multifunctional peptidase 2) | No Class |
| 1422962_a_at | Psmb8  | proteasome (prosome, macropain) subunit, beta type 8 (large multifunctional peptidase 7) | No Class |
| 1448822_at   | Psmb6  | proteasome (prosome, macropain) subunit, beta type 6                                     | No Class |
| 1415676_a_at | Psmb5  | proteasome (prosome, macropain) subunit, beta type 5                                     | No Class |
| 1451205_at   | Psmb4  | proteasome (prosome, macropain) subunit, beta type 4                                     | No Class |
| 1448262_at   | Psmb2  | proteasome (prosome, macropain) subunit, beta type 2                                     | No Class |
| 1448632_at   | Psmb10 | proteasome (prosome, macropain) subunit, beta type 10                                    | No Class |
| 1434356_a_at | Psma5  | proteasome (prosome, macropain) subunit, alpha type 5                                    | No Class |
| 1424681_a_at | Psma5  | proteasome (prosome, macropain) subunit, alpha type 5                                    | No Class |
| 1457731_at   | Psip1  | PC4 and SFRS1 interacting protein 1                                                      | No Class |
| 1431889_x_at | Psg21  | pregnancy-specific glycoprotein 21                                                       | No Class |
| 1431542_at   | Psen2  | presenilin 2                                                                             | No Class |
| 1450399_at   | Psen1  | presenilin 1                                                                             | No Class |
| 1421853_at   | Psen1  | presenilin 1                                                                             | No Class |
| 1435780_at   | Psd    | pleckstrin and Sec7 domain containing                                                    | No Class |
| 1451064_a_at | Psat1  | phosphoserine aminotransferase 1                                                         | No Class |
| 1419669_at   | Prtn3  | proteinase 3                                                                             | No Class |
| 1438410_at   | Prtg   | protogenin homolog (Gallus gallus)                                                       | No Class |
| 1447729_s_at | Prss44 | protease, serine, 44                                                                     | No Class |
| 1418559_at   | Prss39 | protease, serine, 39                                                                     | No Class |
| 1446560_at   | Prss23 | protease, serine, 23                                                                     | No Class |
| 1437671_x_at | Prss23 | protease, serine, 23                                                                     | No Class |
| 1431057_a_at | Prss23 | protease, serine, 23                                                                     | No Class |



|              |           |                                                                  |          |
|--------------|-----------|------------------------------------------------------------------|----------|
| 1424329_a_at | Prrg2     | proline-rich Gla (G-carboxyglutamic acid) polypeptide 2          | No Class |
| 1447914_x_at | Prr5l     | proline rich 5 like                                              | No Class |
| 1429909_at   | Prr5l     | proline rich 5 like                                              | No Class |
| 1444257_at   | Prr11     | proline rich 11                                                  | No Class |
| 1428182_at   | Prpsap1   | phosphoribosyl pyrophosphate synthetase-associated protein 1     | No Class |
| 1454843_at   | Prps2     | phosphoribosyl pyrophosphate synthetase 2                        | No Class |
| 1416052_at   | Prps1     | phosphoribosyl pyrophosphate synthetase 1                        | No Class |
| 1422453_at   | Prpf8     | pre-mRNA processing factor 8                                     | No Class |
| 1425497_a_at | Prpf4b    | PRP4 pre-mRNA processing factor 4 homolog B (yeast)              | No Class |
| 1450035_a_at | Prpf40a   | PRP40 pre-mRNA processing factor 40 homolog A (yeast)            | No Class |
| 1420917_at   | Prpf40a   | PRP40 pre-mRNA processing factor 40 homolog A (yeast)            | No Class |
| 1452688_at   | Prpf39    | PRP39 pre-mRNA processing factor 39 homolog (yeast)              | No Class |
| 1428171_at   | Prpf39    | PRP39 pre-mRNA processing factor 39 homolog (yeast)              | No Class |
| 1453005_at   | Prpf31    | PRP31 pre-mRNA processing factor 31 homolog (yeast)              | No Class |
| 1448633_at   | Prpf31    | PRP31 pre-mRNA processing factor 31 homolog (yeast)              | No Class |
| 1424314_at   | Prpf3     | PRP3 pre-mRNA processing factor 3 homolog (yeast)                | No Class |
| 1456531_x_at | Prpf19    | PRP19/PSO4 pre-mRNA processing factor 19 homolog (S. cerevisiae) | No Class |
| 1450837_at   | Prp2      | proline rich protein 2                                           | No Class |
| 1430243_at   | Prox2     | prospero homeobox 2                                              | No Class |
| 1441963_at   | Prosapip1 | ProSAPIP1 protein                                                | No Class |
| 1451637_a_at | Prol1     | proline rich, lacrimal 1                                         | No Class |
| 1451952_at   | Prok2     | prokineticin 2                                                   | No Class |
| 1442508_at   | Proca1    | protein interacting with cyclin A1                               | No Class |
| 1418845_at   | Proc      | protein C                                                        | No Class |
| 1448233_at   | Prnp      | prion protein                                                    | No Class |
| 1451248_at   | Prmt7     | protein arginine N-methyltransferase 7                           | No Class |
| 1426749_at   | Prmt3     | protein arginine N-methyltransferase 3                           | No Class |
| 1450226_at   | Prlr      | prolactin receptor                                               | No Class |
| 1448556_at   | Prlr      | prolactin receptor                                               | No Class |
| 1437397_at   | Prlr      | prolactin receptor                                               | No Class |
| 1429826_at   | Pri7b1    | prolactin family 7, subfamily b, member 1                        | No Class |
| 1415848_at   | Prl3d1    | prolactin family 3, subfamily d, member 1                        | No Class |
| 1451299_at   | Prkx      | protein kinase, X-linked                                         | No Class |
| 1424286_at   | Prkx      | protein kinase, X-linked                                         | No Class |
| 1417425_at   | Prkrip1   | Prkr interacting protein 1 (IL11 inducible)                      | No Class |
| 1421354_at   | Prkg2     | protein kinase, cGMP-dependent, type II                          | No Class |
| 1444232_at   | Prkg1     | protein kinase, cGMP-dependent, type I                           | No Class |
| 1428229_at   | Prkd3     | protein kinase D3                                                | No Class |
| 1420567_at   | Prkd3     | protein kinase D3                                                | No Class |
| 1422673_at   | Prkd1     | protein kinase D1                                                | No Class |
| 1416339_a_at | PrkcsH    | protein kinase C substrate 80K-H                                 | No Class |
| 1448695_at   | Prkci     | protein kinase C, iota                                           | No Class |
| 1417410_s_at | Prkci     | protein kinase C, iota                                           | No Class |
| 1442256_at   | Prkcd     | protein kinase C, delta                                          | No Class |
| 1456475_s_at | Prkar2b   | protein kinase, cAMP dependent regulatory, type II beta          | No Class |
| 1438664_at   | Prkar2b   | protein kinase, cAMP dependent regulatory, type II beta          | No Class |
| 1430640_a_at | Prkar2b   | protein kinase, cAMP dependent regulatory, type II beta          | No Class |
| 1452915_at   | Prkar2a   | protein kinase, cAMP dependent regulatory, type II alpha         | No Class |
| 1428783_at   | Prkar2a   | protein kinase, cAMP dependent regulatory, type II alpha         | No Class |
| 1418035_a_at | Prim2     | DNA primase, p58 subunit                                         | No Class |
| 1449061_a_at | Prim1     | DNA primase, p49 subunit                                         | No Class |
| 1418369_at   | Prim1     | DNA primase, p49 subunit                                         | No Class |
| 1428808_at   | Prickle2  | prickle homolog 2 (Drosophila)                                   | No Class |
| 1426345_at   | Prepl     | prolyl endopeptidase-like                                        | No Class |
| 1431420_s_at | Preld1    | PRELI domain containing 1                                        | No Class |
| 1437412_at   | Prdx6-rs1 | peroxiredoxin 6, related sequence 1                              | No Class |
| 1442878_at   | Prdx6     | peroxiredoxin 6                                                  | No Class |

|              |          |                                                                                  |          |
|--------------|----------|----------------------------------------------------------------------------------|----------|
| 1436691_x_at | Prdx1    | peroxiredoxin 1                                                                  | No Class |
| 1434731_x_at | Prdx1    | peroxiredoxin 1                                                                  | No Class |
| 1433866_x_at | Prdx1    | peroxiredoxin 1                                                                  | No Class |
| 1416000_a_at | Prdx1    | peroxiredoxin 1                                                                  | No Class |
| 1432057_a_at | Prdm5    | PR domain containing 5                                                           | No Class |
| 1453068_at   | Prdm2    | PR domain containing 2, with ZNF domain                                          | No Class |
| 1440870_at   | Prdm16   | PR domain containing 16                                                          | No Class |
| 1440745_at   | Prdm16   | PR domain containing 16                                                          | No Class |
| 1431851_at   | Prame    | preferentially expressed antigen in melanoma                                     | No Class |
| 1451242_a_at | Ppp5c    | protein phosphatase 5, catalytic subunit                                         | No Class |
| 1424116_x_at | Ppp5c    | protein phosphatase 5, catalytic subunit                                         | No Class |
| 1424115_at   | Ppp5c    | protein phosphatase 5, catalytic subunit                                         | No Class |
| 1446149_at   | Ppp3cb   | protein phosphatase 3, catalytic subunit, beta isoform                           | No Class |
| 1428463_a_at | Ppp2r5e  | protein phosphatase 2, regulatory subunit B (B56), epsilon isoform               | No Class |
| 1450560_a_at | Ppp2r5d  | protein phosphatase 2, regulatory subunit B (B56), delta isoform                 | No Class |
| 1434206_s_at | Ppp2r5c  | protein phosphatase 2, regulatory subunit B (B56), gamma isoform                 | No Class |
| 1434205_at   | Ppp2r5c  | protein phosphatase 2, regulatory subunit B (B56), gamma isoform                 | No Class |
| 1425726_x_at | Ppp2r5c  | protein phosphatase 2, regulatory subunit B (B56), gamma isoform                 | No Class |
| 1425725_s_at | Ppp2r5c  | protein phosphatase 2, regulatory subunit B (B56), gamma isoform                 | No Class |
| 1453260_a_at | Ppp2r2a  | protein phosphatase 2 (formerly 2A), regulatory subunit B (PR 52), alpha isoform | No Class |
| 1437730_at   | Ppp2r2a  | protein phosphatase 2 (formerly 2A), regulatory subunit B (PR 52), alpha isoform | No Class |
| 1455929_x_at | Ppp2r1a  | protein phosphatase 2 (formerly 2A), regulatory subunit A (PR 65), alpha isoform | No Class |
| 1438991_x_at | Ppp2r1a  | protein phosphatase 2 (formerly 2A), regulatory subunit A (PR 65), alpha isoform | No Class |
| 1438383_x_at | Ppp2r1a  | protein phosphatase 2 (formerly 2A), regulatory subunit A (PR 65), alpha isoform | No Class |
| 1428923_at   | Ppp1r3g  | protein phosphatase 1, regulatory (inhibitor) subunit 3G                         | No Class |
| 1417341_a_at | Ppp1r2   | protein phosphatase 1, regulatory (inhibitor) subunit 2                          | No Class |
| 1455080_at   | Ppp1r16b | protein phosphatase 1, regulatory (inhibitor) subunit 16B                        | No Class |
| 1417701_at   | Ppp1r14c | protein phosphatase 1, regulatory (inhibitor) subunit 14c                        | No Class |
| 1437735_at   | Ppp1r12a | protein phosphatase 1, regulatory (inhibitor) subunit 12A                        | No Class |
| 1448565_at   | Ppp1r11  | protein phosphatase 1, regulatory (inhibitor) subunit 11                         | No Class |
| 1455737_at   | Ppm1h    | protein phosphatase 1H (PP2C domain containing)                                  | No Class |
| 1416792_at   | Ppm1g    | protein phosphatase 1G (formerly 2C), magnesium-dependent, gamma isoform         | No Class |
| 1451943_a_at | Ppm1a    | protein phosphatase 1A, magnesium dependent, alpha isoform                       | No Class |
| 1452458_s_at | Ppil5    | peptidylprolyl isomerase (cyclophilin) like 5                                    | No Class |
| 1427506_at   | Ppil5    | peptidylprolyl isomerase (cyclophilin) like 5                                    | No Class |
| 1452920_a_at | Ppil2    | peptidylprolyl isomerase (cyclophilin)-like 2                                    | No Class |
| 1430813_at   | Ppcdc    | phosphopantothenoylcysteine decarboxylase                                        | No Class |
| 1424336_at   | Ppcdc    | phosphopantothenoylcysteine decarboxylase                                        | No Class |
| 1452831_s_at | Ppat     | phosphoribosyl pyrophosphate amidotransferase                                    | No Class |
| 1449945_at   | Ppargc1b | peroxisome proliferative activated receptor, gamma, coactivator 1 beta           | No Class |
| 1434099_at   | Ppargc1a | peroxisome proliferative activated receptor, gamma, coactivator 1 alpha          | No Class |
| 1449051_at   | Ppara    | peroxisome proliferator activated receptor alpha                                 | No Class |
| 1448908_at   | Ppap2b   | phosphatidic acid phosphatase type 2B                                            | No Class |
| 1453478_at   | Pou3f2   | POU domain, class 3, transcription factor 2                                      | No Class |
| 1427725_a_at | Pou2f2   | POU domain, class 2, transcription factor 2                                      | No Class |
| 1427713_x_at | Pou2f2   | POU domain, class 2, transcription factor 2                                      | No Class |
| 1424220_a_at | Porcn    | porcupine homolog (Drosophila)                                                   | No Class |
| 1449162_at   | Pop7     | processing of precursor 7, ribonuclease P family, ( <i>S. cerevisiae</i> )       | No Class |
| 1416979_at   | Pomp     | proteasome maturation protein                                                    | No Class |
| 1427886_at   | Pom121   | nuclear pore membrane protein 121                                                | No Class |
| 1439266_a_at | Polr3k   | polymerase (RNA) III (DNA directed) polypeptide K                                | No Class |
| 1422753_a_at | Polr3k   | polymerase (RNA) III (DNA directed) polypeptide K                                | No Class |
| 1451773_s_at | Polr3f   | polymerase (RNA) III (DNA directed) polypeptide F                                | No Class |
| 1430328_at   | Polr3f   | polymerase (RNA) III (DNA directed) polypeptide F                                | No Class |
| 1429686_at   | Polr3f   | polymerase (RNA) III (DNA directed) polypeptide F                                | No Class |
| 1451658_a_at | Polr3c   | polymerase (RNA) III (DNA directed) polypeptide C                                | No Class |
| 1437525_a_at | Polr3a   | polymerase (RNA) III (DNA directed) polypeptide A                                | No Class |

|              |                |                                                                              |          |
|--------------|----------------|------------------------------------------------------------------------------|----------|
| 1417720_at   | Polr2j         | polymerase (RNA) II (DNA directed) polypeptide J                             | No Class |
| 1427402_at   | Polr2f         | polymerase (RNA) II (DNA directed) polypeptide F                             | No Class |
| 1415754_at   | Polr2f         | polymerase (RNA) II (DNA directed) polypeptide F                             | No Class |
| 1417138_s_at | Polr2e         | polymerase (RNA) II (DNA directed) polypeptide E                             | No Class |
| 1435057_x_at | Polr1e         | polymerase (RNA) I polypeptide E                                             | No Class |
| 1419058_at   | Polr1e         | polymerase (RNA) I polypeptide E                                             | No Class |
| 1416126_at   | Polr1b         | polymerase (RNA) I polypeptide B                                             | No Class |
| 1456066_a_at | Polr1a         | polymerase (RNA) I polypeptide A                                             | No Class |
| 1417775_at   | Polr1a         | polymerase (RNA) I polypeptide A                                             | No Class |
| 1449483_at   | Polk           | polymerase (DNA directed), kappa                                             | No Class |
| 1423372_at   | Pole4          | polymerase (DNA-directed), epsilon 4 (p12 subunit)                           | No Class |
| 1450727_a_at | Poldip2        | polymerase (DNA-directed), delta interacting protein 2                       | No Class |
| 1427885_at   | Pold4          | polymerase (DNA-directed), delta 4                                           | No Class |
| 1443733_x_at | Pold3          | polymerase (DNA-directed), delta 3, accessory subunit                        | No Class |
| 1426838_at   | Pold3          | polymerase (DNA-directed), delta 3, accessory subunit                        | No Class |
| 1456055_x_at | Pold1          | polymerase (DNA directed), delta 1, catalytic subunit                        | No Class |
| 1439840_at   | Polb           | polymerase (DNA directed), beta                                              | No Class |
| 1456782_at   | Pogk /// Tada1 | pogo transposable element with KRAB domain /// transcriptional adaptor 1     | No Class |
| 1447864_s_at | Pogk           | pogo transposable element with KRAB domain                                   | No Class |
| 1415793_at   | Pnpo           | pyridoxine 5 -phosphate oxidase                                              | No Class |
| 1451361_a_at | Pnpla7         | patatin-like phospholipase domain containing 7                               | No Class |
| 1437438_x_at | Pnliprp2       | pancreatic lipase-related protein 2                                          | No Class |
| 1438071_at   | Pms1           | postmeiotic segregation increased 1 ( <i>S. cerevisiae</i> )                 | No Class |
| 1431464_a_at | Pmm2           | phosphomannomutase 2                                                         | No Class |
| 1430780_a_at | Pmm1           | phosphomannomutase 1                                                         | No Class |
| 1424167_a_at | Pmm1           | phosphomannomutase 1                                                         | No Class |
| 1456103_at   | Pml            | promyelocytic leukemia                                                       | No Class |
| 1448757_at   | Pml            | promyelocytic leukemia                                                       | No Class |
| 1452295_at   | Pmepa1         | prostate transmembrane protein, androgen induced 1                           | No Class |
| 1422706_at   | Pmepa1         | prostate transmembrane protein, androgen induced 1                           | No Class |
| 1422705_at   | Pmepa1         | prostate transmembrane protein, androgen induced 1                           | No Class |
| 1450905_at   | Plxnc1         | plexin C1                                                                    | No Class |
| 1423214_at   | Plxnc1         | plexin C1                                                                    | No Class |
| 1423213_at   | Plxnc1         | plexin C1                                                                    | No Class |
| 1440813_s_at | Plxnb3         | plexin B3                                                                    | No Class |
| 1438638_x_at | Plxnb2         | Plexin B2                                                                    | No Class |
| 1455037_at   | Plxna2         | plexin A2                                                                    | No Class |
| 1453286_at   | Plxna2         | plexin A2                                                                    | No Class |
| 1451753_at   | Plxna2         | plexin A2                                                                    | No Class |
| 1442610_at   | Plxdc1         | plexin domain containing 1                                                   | No Class |
| 1456424_s_at | Pltp           | phospholipid transfer protein                                                | No Class |
| 1417963_at   | Pltp           | phospholipid transfer protein                                                | No Class |
| 1449020_at   | Plscr3         | phospholipid scramblase 3                                                    | No Class |
| 1431081_a_at | Plscr3         | phospholipid scramblase 3                                                    | No Class |
| 1453181_x_at | Plscr1         | phospholipid scramblase 1                                                    | No Class |
| 1429527_a_at | Plscr1         | phospholipid scramblase 1                                                    | No Class |
| 1448282_at   | Plrg1          | pleiotropic regulator 1, PRL1 homolog ( <i>Arabidopsis</i> )                 | No Class |
| 1416289_at   | Plod1          | procollagen-lysine, 2-oxoglutarate 5-dioxygenase 1                           | No Class |
| 1443780_at   | Plk2           | Polo-like kinase 2 ( <i>Drosophila</i> )                                     | No Class |
| 1441915_s_at | Plin5          | perilipin 5                                                                  | No Class |
| 1417128_at   | Plekho1        | pleckstrin homology domain containing, family O member 1                     | No Class |
| 1447807_s_at | Plekhh1        | pleckstrin homology domain containing, family H (with MyTH4 domain) member 1 | No Class |
| 1423862_at   | Plekhh2        | pleckstrin homology domain containing, family F (with FYVE domain) member 2  | No Class |
| 1423861_at   | Plekhh2        | pleckstrin homology domain containing, family F (with FYVE domain) member 2  | No Class |
| 1424671_at   | Plekhh1        | pleckstrin homology domain containing, family F (with FYVE domain) member 1  | No Class |
| 1460341_at   | Plekhh2        | pleckstrin homology domain containing, family B (evectins) member 2          | No Class |
| 1447810_x_at | Plekhh2        | pleckstrin homology domain containing, family B (evectins) member 2          | No Class |

|              |                                |                                                                                                        |          |
|--------------|--------------------------------|--------------------------------------------------------------------------------------------------------|----------|
| 1451907_a_at | Plekha4                        | pleckstrin homology domain containing, family A (phosphoinositide binding specific) member 4           | No Class |
| 1425867_at   | Plekha4                        | pleckstrin homology domain containing, family A (phosphoinositide binding specific) member 4           | No Class |
| 1425866_a_at | Plekha4                        | pleckstrin homology domain containing, family A (phosphoinositide binding specific) member 4           | No Class |
| 1417289_at   | Plekha2                        | pleckstrin homology domain-containing, family A (phosphoinositide binding specific) member 2           | No Class |
| 1457088_at   | Pldn                           | pallidin                                                                                               | No Class |
| 1440505_at   | Plcxd1                         | phosphatidylinositol-specific phospholipase C, X domain containing 1                                   | No Class |
| 1445723_at   | Plcl1                          | phospholipase C-like 1                                                                                 | No Class |
| 1448661_at   | Plcb3                          | phospholipase C, beta 3                                                                                | No Class |
| 1437893_at   | Plb1                           | phospholipase B1                                                                                       | No Class |
| 1430666_at   | Plb1                           | phospholipase B1                                                                                       | No Class |
| 1444647_at   | Plaa                           | phospholipase A2, activating protein                                                                   | No Class |
| 1435001_at   | Plaa                           | phospholipase A2, activating protein                                                                   | No Class |
| 1431277_at   | Pla2g6                         | phospholipase A2, group VI                                                                             | No Class |
| 1418987_at   | Pla2g2d                        | phospholipase A2, group IID                                                                            | No Class |
| 1437015_x_at | Pla2g1b                        | phospholipase A2, group IB, pancreas                                                                   | No Class |
| 1416626_at   | Pla2g1b                        | phospholipase A2, group IB, pancreas                                                                   | No Class |
| 1423704_at   | Pla2g15                        | phospholipase A2, group XV                                                                             | No Class |
| 1422341_s_at | Pla2g15                        | phospholipase A2, group XV                                                                             | No Class |
| 1418831_at   | Pkp3                           | plakophilin 3                                                                                          | No Class |
| 1460511_at   | Pkp2                           | plakophilin 2                                                                                          | No Class |
| 1449799_s_at | Pkp2                           | plakophilin 2                                                                                          | No Class |
| 1429183_at   | Pkp2                           | plakophilin 2                                                                                          | No Class |
| 1420259_at   | Pkp2                           | Plakophilin 2                                                                                          | No Class |
| 1433907_at   | Pknnox2                        | Pbx/knotted 1 homeobox 2                                                                               | No Class |
| 1434383_at   | Pja2                           | praja 2, RING-H2 motif containing                                                                      | No Class |
| 1424442_a_at | Pja2                           | praja 2, RING-H2 motif containing                                                                      | No Class |
| 1455204_at   | Pitpnc1                        | phosphatidylinositol transfer protein, cytoplasmic 1                                                   | No Class |
| 1453750_x_at | Pitpnc1                        | phosphatidylinositol transfer protein, cytoplasmic 1                                                   | No Class |
| 1452940_x_at | Pitpnc1                        | phosphatidylinositol transfer protein, cytoplasmic 1                                                   | No Class |
| 1452939_a_at | Pitpnc1                        | phosphatidylinositol transfer protein, cytoplasmic 1                                                   | No Class |
| 1435066_at   | Pitpnc1                        | phosphatidylinositol transfer protein, cytoplasmic 1                                                   | No Class |
| 1431074_a_at | Pitpnc1                        | phosphatidylinositol transfer protein, cytoplasmic 1                                                   | No Class |
| 1428878_a_at | Pitpnc1                        | phosphatidylinositol transfer protein, cytoplasmic 1                                                   | No Class |
| 1428025_s_at | Pitpnc1                        | phosphatidylinositol transfer protein, cytoplasmic 1                                                   | No Class |
| 1434257_s_at | Pitpnb                         | phosphatidylinositol transfer protein, beta                                                            | No Class |
| 1421013_at   | Pitpnb                         | phosphatidylinositol transfer protein, beta                                                            | No Class |
| 1420307_a_at | Pitpnb                         | phosphatidylinositol transfer protein, beta                                                            | No Class |
| 1439069_a_at | Pisd-ps3                       | phosphatidylserine decarboxylase, pseudogene 3                                                         | No Class |
| 1434975_x_at | Pisd-ps3                       | phosphatidylserine decarboxylase, pseudogene 3                                                         | No Class |
| 1439070_x_at | Pisd-ps1 /// Pisd-ps3          | phosphatidylserine decarboxylase, pseudogene 1 /// phosphatidylserine decarboxylase, pseudogene 3      | No Class |
| 1436944_x_at | Pisd-ps1 /// Pisd-ps3          | phosphatidylserine decarboxylase, pseudogene 1 /// phosphatidylserine decarboxylase, pseudogene 3      | No Class |
| 1435353_a_at | Pisd-ps1 /// Pisd-ps3          | phosphatidylserine decarboxylase, pseudogene 1 /// phosphatidylserine decarboxylase, pseudogene 3      | No Class |
| 1426387_x_at | Pisd /// Pisd-ps1 /// Pisd-ps3 | phosphatidylserine decarboxylase /// phosphatidylserine decarboxylase, pseudogene 1 /// phosphatidylse | No Class |
| 1418809_at   | Pira2                          | paired-Ig-like receptor A2                                                                             | No Class |
| 1449374_at   | Pipox                          | pipecolic acid oxidase                                                                                 | No Class |
| 1421834_at   | Pip5k1b                        | phosphatidylinositol-4-phosphate 5-kinase, type 1 beta                                                 | No Class |
| 1421833_at   | Pip5k1b                        | phosphatidylinositol-4-phosphate 5-kinase, type 1 beta                                                 | No Class |
| 1449404_at   | Pip4k2a                        | phosphatidylinositol-5-phosphate 4-kinase, type II, alpha                                              | No Class |
| 1442310_at   | Pip4k2a                        | Phosphatidylinositol-5-phosphate 4-kinase, type II, alpha                                              | No Class |
| 1419280_at   | Pip4k2a                        | phosphatidylinositol-5-phosphate 4-kinase, type II, alpha                                              | No Class |
| 1419279_at   | Pip4k2a                        | phosphatidylinositol-5-phosphate 4-kinase, type II, alpha                                              | No Class |
| 1440454_at   | Pion                           | pigeon homolog (Drosophila)                                                                            | No Class |
| 1435596_at   | Pion                           | pigeon homolog (Drosophila)                                                                            | No Class |
| 1427515_at   | Pion                           | pigeon homolog (Drosophila)                                                                            | No Class |
| 1416228_at   | Pin1                           | protein (peptidyl-prolyl cis/trans isomerase) NIMA-interacting 1                                       | No Class |
| 1427327_at   | Pilra                          | paired immunoglobulin-like type 2 receptor alpha                                                       | No Class |
| 1452994_at   | Pikfyve                        | phosphoinositide kinase, FYVE finger containing                                                        | No Class |

|              |         |                                                                  |          |
|--------------|---------|------------------------------------------------------------------|----------|
| 1437956_at   | Pik3r6  | phosphoinositide-3-kinase, regulatory subunit 6                  | No Class |
| 1428332_at   | Pik3ip1 | phosphoinositide-3-kinase interacting protein 1                  | No Class |
| 1453281_at   | Pik3cd  | phosphatidylinositol 3-kinase catalytic delta polypeptide        | No Class |
| 1422992_s_at | Pik3cd  | phosphatidylinositol 3-kinase catalytic delta polypeptide        | No Class |
| 1422991_at   | Pik3cd  | phosphatidylinositol 3-kinase catalytic delta polypeptide        | No Class |
| 1432115_a_at | Pign    | phosphatidylinositol glycan anchor biosynthesis, class N         | No Class |
| 1425997_a_at | Pign    | phosphatidylinositol glycan anchor biosynthesis, class N         | No Class |
| 1421284_at   | Pign    | phosphatidylinositol glycan anchor biosynthesis, class N         | No Class |
| 1418964_at   | Pigm    | phosphatidylinositol glycan anchor biosynthesis, class M         | No Class |
| 1421646_a_at | Pias3   | protein inhibitor of activated STAT 3                            | No Class |
| 1441549_at   | Pi4kb   | Phosphatidylinositol 4-kinase, catalytic, beta polypeptide       | No Class |
| 1416489_at   | Pi4k2b  | phosphatidylinositol 4-kinase type 2 beta                        | No Class |
| 1427903_at   | Phpt1   | phosphohistidine phosphatase 1                                   | No Class |
| 1435567_at   | Phka1   | phosphorylase kinase alpha 1                                     | No Class |
| 1447038_x_at | Phip    | pleckstrin homology domain interacting protein                   | No Class |
| 1447037_at   | Phip    | pleckstrin homology domain interacting protein                   | No Class |
| 1443522_s_at | Phip    | pleckstrin homology domain interacting protein                   | No Class |
| 1438535_at   | Phip    | pleckstrin homology domain interacting protein                   | No Class |
| 1429004_at   | Phip    | pleckstrin homology domain interacting protein                   | No Class |
| 1426658_x_at | Phgdh   | 3-phosphoglycerate dehydrogenase                                 | No Class |
| 1460398_at   | Phf8    | PHD finger protein 8                                             | No Class |
| 1430415_at   | Phf6    | PHD finger protein 6                                             | No Class |
| 1424170_at   | Phf5a   | PHD finger protein 5A                                            | No Class |
| 1429000_at   | Phf3    | PHD finger protein 3                                             | No Class |
| 1441145_at   | Phf21a  | PHD finger protein 21A                                           | No Class |
| 1437563_at   | Phf20l1 | PHD finger protein 20-like 1                                     | No Class |
| 1452180_at   | Phf17   | PHD finger protein 17                                            | No Class |
| 1452179_at   | Phf17   | PHD finger protein 17                                            | No Class |
| 1426752_at   | Phf17   | PHD finger protein 17                                            | No Class |
| 1455345_at   | Phf15   | PHD finger protein 15                                            | No Class |
| 1453271_at   | Phf14   | PHD finger protein 14                                            | No Class |
| 1440247_at   | Phf14   | PHD finger protein 14                                            | No Class |
| 1416542_at   | Phf1    | PHD finger protein 1                                             | No Class |
| 1443651_at   | Phc3    | Polyhomeotic-like 3 (Drosophila)                                 | No Class |
| 1416202_at   | Phb2    | prohibitin 2                                                     | No Class |
| 1434258_s_at | Phactr4 | phosphatase and actin regulator 4                                | No Class |
| 1432844_at   | Phactr4 | phosphatase and actin regulator 4                                | No Class |
| 1455229_x_at | Pgs1    | phosphatidylglycerophosphate synthase 1                          | No Class |
| 1454046_x_at | Pgs1    | phosphatidylglycerophosphate synthase 1                          | No Class |
| 1454045_a_at | Pgs1    | phosphatidylglycerophosphate synthase 1                          | No Class |
| 1428228_at   | Pgm3    | phosphoglucomutase 3                                             | No Class |
| 1438774_s_at | Pgm2l1  | phosphoglucomutase 2-like 1                                      | No Class |
| 1417864_at   | Pgk1    | phosphoglycerate kinase 1                                        | No Class |
| 1438627_x_at | Pgd     | phosphogluconate dehydrogenase                                   | No Class |
| 1437380_x_at | Pgd     | phosphogluconate dehydrogenase                                   | No Class |
| 1436771_x_at | Pgd     | phosphogluconate dehydrogenase                                   | No Class |
| 1435037_at   | Pgap3   | post-GPI attachment to proteins 3                                | No Class |
| 1424614_at   | Pgap2   | post-GPI attachment to proteins 2                                | No Class |
| 1426554_a_at | Pgam1   | phosphoglycerate mutase 1                                        | No Class |
| 1436993_x_at | Pfn2    | profilin 2                                                       | No Class |
| 1418210_at   | Pfn2    | profilin 2                                                       | No Class |
| 1418209_a_at | Pfn2    | profilin 2                                                       | No Class |
| 1429486_at   | Pfkfb2  | 6-phosphofructo-2-kinase/fructose-2,6-biphosphatase 2            | No Class |
| 1421950_at   | Pfdn2   | prefoldin 2                                                      | No Class |
| 1417026_at   | Pfdn1   | prefoldin 1                                                      | No Class |
| 1455496_at   | Pfas    | phosphoribosylformylglycinamide synthase (FGAR amidotransferase) | No Class |
| 1422063_a_at | Pex5    | peroxisomal biogenesis factor 5                                  | No Class |

|              |         |                                                                    |          |
|--------------|---------|--------------------------------------------------------------------|----------|
| 1448332_at   | Pex19   | peroxisomal biogenesis factor 19                                   | No Class |
| 1416425_at   | Pex19   | peroxisomal biogenesis factor 19                                   | No Class |
| 1430857_s_at | Pex11c  | peroxisomal biogenesis factor 11 gamma                             | No Class |
| 1457350_at   | Per2    | period homolog 2 (Drosophila)                                      | No Class |
| 1449851_at   | Per1    | period homolog 1 (Drosophila)                                      | No Class |
| 1427038_at   | Penk    | preproenkephalin                                                   | No Class |
| 1434071_a_at | Pelo    | pelota homolog (Drosophila)                                        | No Class |
| 1459398_at   | Peli1   | Pellino 1                                                          | No Class |
| 1431061_s_at | Peli1   | pellino 1                                                          | No Class |
| 1433924_at   | Peg3    | paternally expressed 3                                             | No Class |
| 1417356_at   | Peg3    | paternally expressed 3                                             | No Class |
| 1417355_at   | Peg3    | paternally expressed 3                                             | No Class |
| 1415950_a_at | Pebp1   | phosphatidylethanolamine binding protein 1                         | No Class |
| 1416406_at   | Pea15a  | phosphoprotein enriched in astrocytes 15A                          | No Class |
| 1416846_a_at | Pdzrn3  | PDZ domain containing RING finger 3                                | No Class |
| 1451269_at   | Pdzd11  | PDZ domain containing 11                                           | No Class |
| 1436372_a_at | Pdxdc1  | pyridoxal-dependent decarboxylase domain containing 1              | No Class |
| 1428200_a_at | Pdxdc1  | pyridoxal-dependent decarboxylase domain containing 1              | No Class |
| 1419327_at   | Pdxdc1  | pyridoxal-dependent decarboxylase domain containing 1              | No Class |
| 1436161_at   | Pds5b   | PDS5, regulator of cohesion maintenance, homolog B (S. cerevisiae) | No Class |
| 1435242_at   | Pds5b   | PDS5, regulator of cohesion maintenance, homolog B (S. cerevisiae) | No Class |
| 1438201_at   | Pdp1    | pyruvate dehydrogenase phosphatase catalytic subunit 1             | No Class |
| 1434228_at   | Pdp1    | pyruvate dehydrogenase phosphatase catalytic subunit 1             | No Class |
| 1428319_at   | Pdlim7  | PDZ and LIM domain 7                                               | No Class |
| 1450786_x_at | Pdlim5  | PDZ and LIM domain 5                                               | No Class |
| 1422863_s_at | Pdlim5  | PDZ and LIM domain 5                                               | No Class |
| 1422862_at   | Pdlim5  | PDZ and LIM domain 5                                               | No Class |
| 1422861_s_at | Pdlim5  | PDZ and LIM domain 5                                               | No Class |
| 1421413_a_at | Pdlim5  | PDZ and LIM domain 5                                               | No Class |
| 1417273_at   | Pdk4    | pyruvate dehydrogenase kinase, isoenzyme 4                         | No Class |
| 1448825_at   | Pdk2    | pyruvate dehydrogenase kinase, isoenzyme 2                         | No Class |
| 1423423_at   | Pdia3   | protein disulfide isomerase associated 3                           | No Class |
| 1458218_s_at | Pde7a   | phosphodiesterase 7A                                               | No Class |
| 1451839_a_at | Pde7a   | phosphodiesterase 7A                                               | No Class |
| 1450933_at   | Pde7a   | phosphodiesterase 7A                                               | No Class |
| 1439484_at   | Pde7a   | phosphodiesterase 7A                                               | No Class |
| 1438041_at   | Pde7a   | phosphodiesterase 7A                                               | No Class |
| 1423314_s_at | Pde7a   | phosphodiesterase 7A                                               | No Class |
| 1423313_at   | Pde7a   | phosphodiesterase 7A                                               | No Class |
| 1455970_at   | Pde5a   | phosphodiesterase 5A, cGMP-specific                                | No Class |
| 1456413_at   | Pde4dip | phosphodiesterase 4D interacting protein (myomegalin)              | No Class |
| 1440374_at   | Pde1c   | phosphodiesterase 1C                                               | No Class |
| 1440338_at   | Pde12   | phosphodiesterase 12                                               | No Class |
| 1426184_a_at | Pdcd6ip | programmed cell death 6 interacting protein                        | No Class |
| 1450638_at   | Pdcd5   | programmed cell death 5                                            | No Class |
| 1428688_at   | Pdcd11  | programmed cell death 11                                           | No Class |
| 1434020_at   | Pdap1   | PDGFA associated protein 1                                         | No Class |
| 1434019_at   | Pdap1   | PDGFA associated protein 1                                         | No Class |
| 1450434_s_at | Pcyt1a  | phosphate cytidylyltransferase 1, choline, alpha isoform           | No Class |
| 1438011_at   | Pcyt1a  | phosphate cytidylyltransferase 1, choline, alpha isoform           | No Class |
| 1424453_at   | Pcyt1a  | phosphate cytidylyltransferase 1, choline, alpha isoform           | No Class |
| 1421957_a_at | Pcyt1a  | phosphate cytidylyltransferase 1, choline, alpha isoform           | No Class |
| 1416383_a_at | Pcx     | pyruvate carboxylase                                               | No Class |
| 1419047_at   | Pcnx    | pecanex homolog (Drosophila)                                       | No Class |
| 1417947_at   | Pcna    | proliferating cell nuclear antigen                                 | No Class |
| 1435587_at   | Pcid2   | PCI domain containing 2                                            | No Class |
| 1424081_at   | Pcgf6   | polycomb group ring finger 6                                       | No Class |

|              |                 |                                                                                                     |          |
|--------------|-----------------|-----------------------------------------------------------------------------------------------------|----------|
| 1456489_at   | Pcf11           | cleavage and polyadenylation factor subunit homolog ( <i>S. cerevisiae</i> )                        | No Class |
| 1420422_at   | Pcdhb21         | protocadherin beta 21                                                                               | No Class |
| 1427687_at   | Pcdha10         | protocadherin alpha 10                                                                              | No Class |
| 1444301_at   | Pcdh10          | protocadherin 10                                                                                    | No Class |
| 1450969_at   | Pccb            | propionyl Coenzyme A carboxylase, beta polypeptide                                                  | No Class |
| 1447577_x_at | Pcca            | propionyl-Coenzyme A carboxylase, alpha polypeptide                                                 | No Class |
| 1421743_a_at | Pcbp2           | poly(RC) binding protein 2                                                                          | No Class |
| 1447640_s_at | Pbx3            | pre B-cell leukemia transcription factor 3                                                          | No Class |
| 1448627_s_at | Pbk             | PDZ binding kinase                                                                                  | No Class |
| 1423303_at   | Paxip1          | PAX interacting (with transcription-activation domain) protein 1                                    | No Class |
| 1451598_at   | Pax4            | paired box gene 4                                                                                   | No Class |
| 1434495_at   | Patz1           | POZ (BTB) and AT hook containing zinc finger 1                                                      | No Class |
| 1450993_at   | Pask            | PAS domain containing serine/threonine kinase                                                       | No Class |
| 1431375_s_at | Parva           | parvin, alpha                                                                                       | No Class |
| 1416897_at   | Parp9           | poly (ADP-ribose) polymerase family, member 9                                                       | No Class |
| 1451564_at   | Parp14          | poly (ADP-ribose) polymerase family, member 14                                                      | No Class |
| 1444029_at   | Parp11          | poly (ADP-ribose) polymerase family, member 11                                                      | No Class |
| 1452178_at   | Parp10 /// Plec | poly (ADP-ribose) polymerase family, member 10 /// plectin                                          | No Class |
| 1443573_at   | Parp1           | poly (ADP-ribose) polymerase family, member 1                                                       | No Class |
| 1435368_a_at | Parp1           | poly (ADP-ribose) polymerase family, member 1                                                       | No Class |
| 1437334_x_at | Parn            | poly(A)-specific ribonuclease (deadenylation nuclease)                                              | No Class |
| 1433478_at   | Parl            | presenilin associated, rhomboid-like                                                                | No Class |
| 1450025_at   | Pard6g          | par-6 partitioning defective 6 homolog gamma ( <i>C. elegans</i> )                                  | No Class |
| 1441254_at   | Pard3b          | par-3 partitioning defective 3 homolog B ( <i>C. elegans</i> )                                      | No Class |
| 1436764_at   | Pard3           | par-3 (partitioning defective 3) homolog ( <i>C. elegans</i> )                                      | No Class |
| 1434775_at   | Pard3           | par-3 (partitioning defective 3) homolog ( <i>C. elegans</i> )                                      | No Class |
| 1420391_at   | Pard3           | par-3 (partitioning defective 3) homolog ( <i>C. elegans</i> )                                      | No Class |
| 1455025_at   | Paqr9           | progesterin and adipoQ receptor family member IX                                                    | No Class |
| 1460459_at   | Paqr5           | progesterin and adipoQ receptor family member V                                                     | No Class |
| 1456152_at   | Paqr5           | progesterin and adipoQ receptor family member V                                                     | No Class |
| 1434510_at   | Papss2          | 3'-phosphoadenosine 5'-phosphosulfate synthase 2                                                    | No Class |
| 1421989_s_at | Papss2          | 3'-phosphoadenosine 5'-phosphosulfate synthase 2                                                    | No Class |
| 1421987_at   | Papss2          | 3'-phosphoadenosine 5'-phosphosulfate synthase 2                                                    | No Class |
| 1432591_at   | Pappa           | pregnancy-associated plasma protein A                                                               | No Class |
| 1427633_a_at | Pappa           | pregnancy-associated plasma protein A                                                               | No Class |
| 1427241_at   | Papolg          | poly(A) polymerase gamma                                                                            | No Class |
| 1456915_at   | Papolb          | poly (A) polymerase beta (testis specific)                                                          | No Class |
| 1438003_at   | Papd7           | PAP associated domain containing 7                                                                  | No Class |
| 1442204_at   | Pannx2          | Pannexin 2                                                                                          | No Class |
| 1457110_at   | Pank1           | pantothenate kinase 1                                                                               | No Class |
| 1429813_at   | Pank1           | pantothenate kinase 1                                                                               | No Class |
| 1447895_x_at | Pan3            | PAN3 polyA specific ribonuclease subunit homolog ( <i>S. cerevisiae</i> )                           | No Class |
| 1433529_at   | Pamr1           | peptidase domain containing associated with muscle regeneration 1                                   | No Class |
| 1440635_at   | Palld           | palladin, cytoskeletal associated protein                                                           | No Class |
| 1433768_at   | Palld           | palladin, cytoskeletal associated protein                                                           | No Class |
| 1427228_at   | Palld           | palladin, cytoskeletal associated protein                                                           | No Class |
| 1437318_at   | Pak3            | p21 protein (Cdc42/Rac)-activated kinase 3                                                          | No Class |
| 1435486_at   | Pak3            | p21 protein (Cdc42/Rac)-activated kinase 3                                                          | No Class |
| 1417924_at   | Pak3            | p21 protein (Cdc42/Rac)-activated kinase 3                                                          | No Class |
| 1417923_at   | Pak3            | p21 protein (Cdc42/Rac)-activated kinase 3                                                          | No Class |
| 1436298_x_at | Paics           | phosphoribosylaminoimidazole carboxylase, phosphoribosylaminoribosylaminoimidazole, succinocarboxar | No Class |
| 1423565_at   | Paics           | phosphoribosylaminoimidazole carboxylase, phosphoribosylaminoribosylaminoimidazole, succinocarboxar | No Class |
| 1423564_a_at | Paics           | phosphoribosylaminoimidazole carboxylase, phosphoribosylaminoribosylaminoimidazole, succinocarboxar | No Class |
| 1448489_at   | Pafah2          | platelet-activating factor acetylhydrolase 2                                                        | No Class |
| 1439656_at   | Pafah1b1        | Platelet-activating factor acetylhydrolase, isoform 1b, subunit 1                                   | No Class |
| 1427703_at   | Pafah1b1        | platelet-activating factor acetylhydrolase, isoform 1b, subunit 1                                   | No Class |
| 1422849_a_at | Pabpn1          | poly(A) binding protein, nuclear 1                                                                  | No Class |

|              |         |                                                                                                                          |          |
|--------------|---------|--------------------------------------------------------------------------------------------------------------------------|----------|
| 1431353_at   | Pabpc4l | poly(A) binding protein, cytoplasmic 4-like                                                                              | No Class |
| 1437465_a_at | P4hb    | prolyl 4-hydroxylase, beta polypeptide                                                                                   | No Class |
| 1452527_a_at | P2rx4   | purinergic receptor P2X, ligand-gated ion channel 4                                                                      | No Class |
| 1425525_a_at | P2rx4   | purinergic receptor P2X, ligand-gated ion channel 4                                                                      | No Class |
| 1447816_x_at | Oxnad1  | oxidoreductase NAD-binding domain containing 1                                                                           | No Class |
| 1436615_a_at | Otc     | ornithine transcarbamylase                                                                                               | No Class |
| 1420525_a_at | Otc     | ornithine transcarbamylase                                                                                               | No Class |
| 1452246_at   | Ostf1   | osteoclast stimulating factor 1                                                                                          | No Class |
| 1426155_a_at | Osr2    | odd-skipped related 2 (Drosophila)                                                                                       | No Class |
| 1449350_at   | Osr1    | odd-skipped related 1 (Drosophila)                                                                                       | No Class |
| 1418675_at   | Osmr    | oncostatin M receptor                                                                                                    | No Class |
| 1435127_a_at | Osgpep1 | O-sialoglycoprotein endopeptidase-like 1                                                                                 | No Class |
| 1428558_at   | Osgpep1 | O-sialoglycoprotein endopeptidase-like 1                                                                                 | No Class |
| 1428557_a_at | Osgpep1 | O-sialoglycoprotein endopeptidase-like 1                                                                                 | No Class |
| 1416117_at   | Orc3l   | origin recognition complex, subunit 3-like (S. cerevisiae)                                                               | No Class |
| 1418225_at   | Orc2l   | origin recognition complex, subunit 2-like (S. cerevisiae)                                                               | No Class |
| 1459402_at   | Oprm1   | opioid receptor, mu 1                                                                                                    | No Class |
| 1424359_at   | Oplah   | 5-oxoprolinase (ATP-hydrolysing)                                                                                         | No Class |
| 1447487_at   | Opalin  | Oligodendrocytic myelin paranodal and inner loop protein                                                                 | No Class |
| 1458350_at   | Opa3    | optic atrophy 3 (human)                                                                                                  | No Class |
| 1460044_at   | Onecut2 | one cut domain, family member 2                                                                                          | No Class |
| 1444980_at   | Onecut2 | one cut domain, family member 2                                                                                          | No Class |
| 1440005_at   | Onecut2 | one cut domain, family member 2                                                                                          | No Class |
| 1432098_a_at | Olf701  | olfactory receptor 701                                                                                                   | No Class |
| 1422360_at   | Olf672  | olfactory receptor 672                                                                                                   | No Class |
| 1422374_s_at | Olf66   | olfactory receptor 66                                                                                                    | No Class |
| 1422351_at   | Olf480  | olfactory receptor 480                                                                                                   | No Class |
| 1457225_at   | Olf288  | olfactory receptor 288                                                                                                   | No Class |
| 1450600_at   | Olf1508 | olfactory receptor 1508                                                                                                  | No Class |
| 1450604_at   | Olf140  | olfactory receptor 140                                                                                                   | No Class |
| 1426562_a_at | Olfm1   | olfactomedin 1                                                                                                           | No Class |
| 1425784_a_at | Olfm1   | olfactomedin 1                                                                                                           | No Class |
| 1451738_at   | Ogt     | O-linked N-acetylglucosamine (GlcNAc) transferase (UDP-N-acetylglucosamine:polypeptide-N-acetylglucosaminyl 4-epimerase) | No Class |
| 1425517_s_at | Ogt     | O-linked N-acetylglucosamine (GlcNAc) transferase (UDP-N-acetylglucosamine:polypeptide-N-acetylglucosaminyl 4-epimerase) | No Class |
| 1425516_at   | Ogt     | O-linked N-acetylglucosamine (GlcNAc) transferase (UDP-N-acetylglucosamine:polypeptide-N-acetylglucosaminyl 4-epimerase) | No Class |
| 1424414_at   | Ogfr1l  | opioid growth factor receptor-like 1                                                                                     | No Class |
| 1424413_at   | Ogfr1l  | opioid growth factor receptor-like 1                                                                                     | No Class |
| 1424412_at   | Ogfr1l  | opioid growth factor receptor-like 1                                                                                     | No Class |
| 1422512_a_at | Ogfr    | opioid growth factor receptor                                                                                            | No Class |
| 1429238_a_at | Ogfod2  | 2-oxoglutarate and iron-dependent oxygenase domain containing 2                                                          | No Class |
| 1449315_at   | Odz3    | odd Oz/ten-m homolog 3 (Drosophila)                                                                                      | No Class |
| 1429178_at   | Odz3    | odd Oz/ten-m homolog 3 (Drosophila)                                                                                      | No Class |
| 1443671_x_at | Odf3b   | outer dense fiber of sperm tails 3B                                                                                      | No Class |
| 1443670_at   | Odf3b   | outer dense fiber of sperm tails 3B                                                                                      | No Class |
| 1439666_at   | Odf3b   | outer dense fiber of sperm tails 3B                                                                                      | No Class |
| 1425191_at   | Ocell1  | occludin/ELL domain containing 1                                                                                         | No Class |
| 1443510_at   | Obsl1   | obscurin-like 1                                                                                                          | No Class |
| 1436414_at   | Obsl1   | obscurin-like 1                                                                                                          | No Class |
| 1460521_a_at | Obfc2a  | oligonucleotide/oligosaccharide-binding fold containing 2A                                                               | No Class |
| 1430623_s_at | Obfc2a  | oligonucleotide/oligosaccharide-binding fold containing 2A                                                               | No Class |
| 1426806_at   | Obfc2a  | oligonucleotide/oligosaccharide-binding fold containing 2A                                                               | No Class |
| 1445544_x_at | Obfc1   | oligonucleotide/oligosaccharide-binding fold containing 1                                                                | No Class |
| 1425065_at   | Oas2    | 2'-5' oligoadenylate synthetase 2                                                                                        | No Class |
| 1424536_at   | Oas1e   | 2'-5' oligoadenylate synthetase 1E                                                                                       | No Class |
| 1424775_at   | Oas1a   | 2'-5' oligoadenylate synthetase 1A                                                                                       | No Class |
| 1422488_at   | Nxt1    | NTF2-related export protein 1                                                                                            | No Class |
| 1429753_at   | Nxph4   | neurexophilin 4                                                                                                          | No Class |



|              |          |                                                                       |          |
|--------------|----------|-----------------------------------------------------------------------|----------|
| 1422466_at   | Nxn      | nucleoredoxin                                                         | No Class |
| 1422465_a_at | Nxn      | nucleoredoxin                                                         | No Class |
| 1453018_at   | Nvl      | nuclear VCP-like                                                      | No Class |
| 1416309_at   | Nusap1   | nucleolar and spindle associated protein 1                            | No Class |
| 1460563_at   | Nus1     | nuclear undecaprenyl pyrophosphate synthase 1 homolog (S. cerevisiae) | No Class |
| 1434304_s_at | Nus1     | nuclear undecaprenyl pyrophosphate synthase 1 homolog (S. cerevisiae) | No Class |
| 1420646_at   | Nus1     | nuclear undecaprenyl pyrophosphate synthase 1 homolog (S. cerevisiae) | No Class |
| 1424889_at   | Nupl2    | nucleoporin like 2                                                    | No Class |
| 1428073_a_at | Nup88    | nucleoporin 88                                                        | No Class |
| 1437520_a_at | Nup85    | nucleoporin 85                                                        | No Class |
| 1447905_x_at | Nup62    | nucleoporin 62                                                        | No Class |
| 1438917_x_at | Nup62    | nucleoporin 62                                                        | No Class |
| 1415926_at   | Nup62    | nucleoporin 62                                                        | No Class |
| 1415925_a_at | Nup62    | nucleoporin 62                                                        | No Class |
| 1432539_a_at | Nup54    | nucleoporin 54                                                        | No Class |
| 1432187_at   | Nup43    | nucleoporin 43                                                        | No Class |
| 1430343_at   | Nup205   | nucleoporin 205                                                       | No Class |
| 1444342_at   | Nup155   | Nucleoporin 155                                                       | No Class |
| 1441689_at   | Nup153   | nucleoporin 153                                                       | No Class |
| 1425368_a_at | Numb     | numb gene homolog (Drosophila)                                        | No Class |
| 1456945_at   | Nudt6    | nudix (nucleoside diphosphate linked moiety X)-type motif 6           | No Class |
| 1449107_at   | Nudt4    | nudix (nucleoside diphosphate linked moiety X)-type motif 4           | No Class |
| 1418505_at   | Nudt4    | nudix (nucleoside diphosphate linked moiety X)-type motif 4           | No Class |
| 1455966_s_at | Nudt21   | nudix (nucleoside diphosphate linked moiety X)-type motif 21          | No Class |
| 1437213_at   | Nudt21   | nudix (nucleoside diphosphate linked moiety X)-type motif 21          | No Class |
| 1437624_x_at | Nudt16l1 | nudix (nucleoside diphosphate linked moiety X)-type motif 16-like 1   | No Class |
| 1453139_at   | Nudt12   | nudix (nucleoside diphosphate linked moiety X)-type motif 12          | No Class |
| 1449140_at   | Nudcd2   | NudC domain containing 2                                              | No Class |
| 1418566_s_at | Nudcd2   | NudC domain containing 2                                              | No Class |
| 1434668_at   | Nucks1   | nuclear casein kinase and cyclin-dependent kinase substrate 1         | No Class |
| 1433519_at   | Nucks1   | nuclear casein kinase and cyclin-dependent kinase substrate 1         | No Class |
| 1459842_x_at | Nubp2    | nucleotide binding protein 2                                          | No Class |
| 1452777_a_at | Nub1     | negative regulator of ubiquitin-like proteins 1                       | No Class |
| 1452776_a_at | Nub1     | negative regulator of ubiquitin-like proteins 1                       | No Class |
| 1420535_a_at | Nub1     | negative regulator of ubiquitin-like proteins 1                       | No Class |
| 1438684_at   | Nuak1    | NUAK family, SNF1-like kinase, 1                                      | No Class |
| 1426003_at   | Ntrk3    | neurotrophic tyrosine kinase, receptor, type 3                        | No Class |
| 1449286_at   | Ntnng1   | netrin G1                                                             | No Class |
| 1430779_at   | Ntnng1   | netrin G1                                                             | No Class |
| 1428547_at   | Nt5e     | 5 nucleotidase, ecto                                                  | No Class |
| 1422974_at   | Nt5e     | 5 nucleotidase, ecto                                                  | No Class |
| 1460615_at   | Nt5dc1   | 5-nucleotidase domain containing 1                                    | No Class |
| 1451180_a_at | Nt5c3l   | 5-nucleotidase, cytosolic III-like                                    | No Class |
| 1445570_at   | Nsun4    | NOL1/NOP2/Sun domain family, member 4                                 | No Class |
| 1416412_at   | Nsmaf    | neutral sphingomyelinase (N-SMase) activation associated factor       | No Class |
| 1447705_at   | Nsl1     | NSL1, MIND kinetochore complex component, homolog (S. cerevisiae)     | No Class |
| 1423055_at   | Nsg1     | neuron specific gene family member 1                                  | No Class |
| 1457205_at   | Nsf      | N-ethylmaleimide sensitive fusion protein                             | No Class |
| 1456916_at   | Nsd1     | Nuclear receptor-binding SET-domain protein 1                         | No Class |
| 1456137_at   | Nrxn3    | neurexin III                                                          | No Class |
| 1448944_at   | Nrp1     | neuropilin 1                                                          | No Class |
| 1448943_at   | Nrp1     | neuropilin 1                                                          | No Class |
| 1418084_at   | Nrp1     | neuropilin 1                                                          | No Class |
| 1428393_at   | Nrn1     | neuritin 1                                                            | No Class |
| 1454295_at   | Nrip1    | nuclear receptor interacting protein 1                                | No Class |
| 1449089_at   | Nrip1    | nuclear receptor interacting protein 1                                | No Class |
| 1434384_at   | Nrip1    | nuclear receptor interacting protein 1                                | No Class |

|              |        |                                                    |          |
|--------------|--------|----------------------------------------------------|----------|
| 1432603_at   | Nrip1  | nuclear receptor interacting protein 1             | No Class |
| 1445914_at   | Nrf1   | Nuclear respiratory factor 1                       | No Class |
| 1424787_a_at | Nrf1   | nuclear respiratory factor 1                       | No Class |
| 1424544_at   | Nrbp2  | nuclear receptor binding protein 2                 | No Class |
| 1417986_at   | Nrarp  | Notch-regulated ankyrin repeat protein             | No Class |
| 1417985_at   | Nrarp  | Notch-regulated ankyrin repeat protein             | No Class |
| 1429127_at   | Nradd  | neurotrophin receptor associated death domain      | No Class |
| 1449706_s_at | Nr5a2  | nuclear receptor subfamily 5, group A, member 2    | No Class |
| 1420410_at   | Nr5a2  | nuclear receptor subfamily 5, group A, member 2    | No Class |
| 1421080_at   | Nr4a3  | nuclear receptor subfamily 4, group A, member 3    | No Class |
| 1450750_a_at | Nr4a2  | nuclear receptor subfamily 4, group A, member 2    | No Class |
| 1450749_a_at | Nr4a2  | nuclear receptor subfamily 4, group A, member 2    | No Class |
| 1416505_at   | Nr4a1  | nuclear receptor subfamily 4, group A, member 1    | No Class |
| 1439696_at   | Nr2c2  | nuclear receptor subfamily 2, group C, member 2    | No Class |
| 1425014_at   | Nr2c2  | nuclear receptor subfamily 2, group C, member 2    | No Class |
| 1449157_at   | Nr2c1  | nuclear receptor subfamily 2, group C, member 1    | No Class |
| 1455590_at   | Nqo2   | NAD(P)H dehydrogenase, quinone 2                   | No Class |
| 1449983_a_at | Nqo2   | NAD(P)H dehydrogenase, quinone 2                   | No Class |
| 1436189_at   | Nqo2   | NAD(P)H dehydrogenase, quinone 2                   | No Class |
| 1450286_at   | Npr3   | natriuretic peptide receptor 3                     | No Class |
| 1448024_at   | Npr3   | natriuretic peptide receptor 3                     | No Class |
| 1435184_at   | Npr3   | natriuretic peptide receptor 3                     | No Class |
| 1452107_s_at | Npnt   | nephronectin                                       | No Class |
| 1452106_at   | Npnt   | nephronectin                                       | No Class |
| 1426560_a_at | Npnt   | nephronectin                                       | No Class |
| 1421429_a_at | Npnt   | nephronectin                                       | No Class |
| 1415839_a_at | Npm1   | nucleophosmin 1                                    | No Class |
| 1434024_at   | Nphp4  | nephronophtisis 4 (juvenile) homolog (human)       | No Class |
| 1431329_at   | Nphp4  | nephronophtisis 4 (juvenile) homolog (human)       | No Class |
| 1448513_a_at | Npc2   | Niemann Pick type C2                               | No Class |
| 1416901_at   | Npc2   | Niemann Pick type C2                               | No Class |
| 1456485_at   | Npat   | nuclear protein in the AT region                   | No Class |
| 1421037_at   | Npas2  | neuronal PAS domain protein 2                      | No Class |
| 1421036_at   | Npas2  | neuronal PAS domain protein 2                      | No Class |
| 1451827_a_at | Nox4   | NADPH oxidase 4                                    | No Class |
| 1419161_a_at | Nox4   | NADPH oxidase 4                                    | No Class |
| 1426938_at   | Nova1  | neuro-oncological ventral antigen 1                | No Class |
| 1423991_at   | Nop14  | NOP14 nucleolar protein homolog (yeast)            | No Class |
| 1423210_a_at | Nop10  | NOP10 ribonucleoprotein homolog (yeast)            | No Class |
| 1448103_s_at | Nono   | non-POU-domain-containing, octamer binding protein | No Class |
| 1415820_x_at | Nono   | non-POU-domain-containing, octamer binding protein | No Class |
| 1455330_at   | Nol9   | nucleolar protein 9                                | No Class |
| 1428950_s_at | Nol8   | nucleolar protein 8                                | No Class |
| 1423480_at   | Nol11  | nucleolar protein 11                               | No Class |
| 1433739_at   | Nol10  | nucleolar protein 10                               | No Class |
| 1444387_at   | Nmt2   | N-myristoyltransferase 2                           | No Class |
| 1425719_a_at | Nmi    | N-myc (and STAT) interactor                        | No Class |
| 1437238_x_at | Nmd3   | NMD3 homolog (S. cerevisiae)                       | No Class |
| 1456185_at   | Nlrp9a | NLR family, pyrin domain containing 9A             | No Class |
| 1427369_at   | Nlrp6  | NLR family, pyrin domain containing 6              | No Class |
| 1458148_at   | Nlrc3  | NLR family, CARD domain containing 3               | No Class |
| 1456467_s_at | Nlk    | nemo like kinase                                   | No Class |
| 1435970_at   | Nlk    | nemo like kinase                                   | No Class |
| 1419112_at   | Nlk    | nemo like kinase                                   | No Class |
| 1424731_at   | Nle1   | notchless homolog 1 (Drosophila)                   | No Class |
| 1434398_at   | Nkrf   | NF-kappaB repressing factor                        | No Class |
| 1433273_at   | Nkain1 | Na+/K+ transporting ATPase interacting 1           | No Class |

|              |         |                                                                                     |          |
|--------------|---------|-------------------------------------------------------------------------------------|----------|
| 1417468_at   | Nit1    | nitrilase 1                                                                         | No Class |
| 1453576_at   | Nipbl   | Nipped-B homolog (Drosophila)                                                       | No Class |
| 1443992_at   | Nipbl   | Nipped-B homolog (Drosophila)                                                       | No Class |
| 1442103_at   | Nipbl   | Nipped-B homolog (Drosophila)                                                       | No Class |
| 1453324_at   | Nip7    | nuclear import 7 homolog (S. cerevisiae)                                            | No Class |
| 1416931_at   | Nif3l1  | Ngg1 interacting factor 3-like 1 (S. pombe)                                         | No Class |
| 1449377_at   | Nicn1   | nicolin 1                                                                           | No Class |
| 1449376_at   | Nicn1   | nicolin 1                                                                           | No Class |
| 1428842_a_at | Ngfrap1 | nerve growth factor receptor (TNFRSF16) associated protein 1                        | No Class |
| 1419675_at   | Ngf     | nerve growth factor                                                                 | No Class |
| 1417997_at   | Ngb     | neuroglobin                                                                         | No Class |
| 1418228_at   | Nfu1    | NFU1 iron-sulfur cluster scaffold homolog (S. cerevisiae)                           | No Class |
| 1417483_at   | Nfkbiz  | nuclear factor of kappa light polypeptide gene enhancer in B-cells inhibitor, zeta  | No Class |
| 1449731_s_at | Nfkbia  | nuclear factor of kappa light polypeptide gene enhancer in B-cells inhibitor, alpha | No Class |
| 1448306_at   | Nfkbia  | nuclear factor of kappa light polypeptide gene enhancer in B-cells inhibitor, alpha | No Class |
| 1438157_s_at | Nfkbia  | nuclear factor of kappa light polypeptide gene enhancer in B-cells inhibitor, alpha | No Class |
| 1436364_x_at | Nfix    | nuclear factor I/X                                                                  | No Class |
| 1436363_a_at | Nfix    | nuclear factor I/X                                                                  | No Class |
| 1423493_a_at | Nfix    | nuclear factor I/X                                                                  | No Class |
| 1435527_at   | Nfic    | nuclear factor I/C                                                                  | No Class |
| 1429148_at   | Nfic    | nuclear factor I/C                                                                  | No Class |
| 1422565_s_at | Nfic    | nuclear factor I/C                                                                  | No Class |
| 1438244_at   | Nfib    | nuclear factor I/B                                                                  | No Class |
| 1432821_at   | Nfatc4  | nuclear factor of activated T-cells, cytoplasmic, calcineurin-dependent 4           | No Class |
| 1419976_s_at | Nfatc3  | nuclear factor of activated T-cells, cytoplasmic, calcineurin-dependent 3           | No Class |
| 1439205_at   | Nfatc2  | nuclear factor of activated T-cells, cytoplasmic, calcineurin-dependent 2           | No Class |
| 1425714_a_at | Nfam1   | Nfat activating molecule with ITAM motif 1                                          | No Class |
| 1435649_at   | Nexn    | nexilin                                                                             | No Class |
| 1432034_at   | Neurog3 | neurogenin 3                                                                        | No Class |
| 1444003_at   | Neurl3  | neuralized homolog 3 homolog (Drosophila)                                           | No Class |
| 1429141_at   | Neurl2  | neuralized-like 2 (Drosophila)                                                      | No Class |
| 1447694_x_at | Neo1    | neogenin                                                                            | No Class |
| 1447693_s_at | Neo1    | neogenin                                                                            | No Class |
| 1440789_at   | Neo1    | neogenin                                                                            | No Class |
| 1434931_at   | Neo1    | neogenin                                                                            | No Class |
| 1447076_at   | Nel1    | NEL-like 1 (chicken)                                                                | No Class |
| 1444753_at   | Nek7    | NIMA (never in mitosis gene a)-related expressed kinase 7                           | No Class |
| 1416817_at   | Nek7    | NIMA (never in mitosis gene a)-related expressed kinase 7                           | No Class |
| 1437579_at   | Nek2    | NIMA (never in mitosis gene a)-related expressed kinase 2                           | No Class |
| 1417299_at   | Nek2    | NIMA (never in mitosis gene a)-related expressed kinase 2                           | No Class |
| 1440633_at   | Neil3   | nei like 3 (E. coli)                                                                | No Class |
| 1424060_at   | Neil3   | nei like 3 (E. coli)                                                                | No Class |
| 1422520_at   | Nefm    | neurofilament, medium polypeptide                                                   | No Class |
| 1451109_a_at | Nedd4   | neural precursor cell expressed, developmentally down-regulated 4                   | No Class |
| 1450431_a_at | Nedd4   | neural precursor cell expressed, developmentally down-regulated 4                   | No Class |
| 1421955_a_at | Nedd4   | neural precursor cell expressed, developmentally down-regulated 4                   | No Class |
| 1418962_at   | Necap2  | NECAP endocytosis associated 2                                                      | No Class |
| 1418961_at   | Necap2  | NECAP endocytosis associated 2                                                      | No Class |
| 1452692_a_at | Ndufv2  | NADH dehydrogenase (ubiquinone) flavoprotein 2                                      | No Class |
| 1434213_x_at | Ndufs8  | NADH dehydrogenase (ubiquinone) Fe-S protein 8                                      | No Class |
| 1423908_at   | Ndufs8  | NADH dehydrogenase (ubiquinone) Fe-S protein 8                                      | No Class |
| 1423907_a_at | Ndufs8  | NADH dehydrogenase (ubiquinone) Fe-S protein 8                                      | No Class |
| 1424313_a_at | Ndufs7  | NADH dehydrogenase (ubiquinone) Fe-S protein 7                                      | No Class |
| 1423737_at   | Ndufs3  | NADH dehydrogenase (ubiquinone) Fe-S protein 3                                      | No Class |
| 1425143_a_at | Ndufs1  | NADH dehydrogenase (ubiquinone) Fe-S protein 1                                      | No Class |
| 1436803_a_at | Ndufb9  | NADH dehydrogenase (ubiquinone) 1 beta subcomplex, 9                                | No Class |
| 1416417_a_at | Ndufb7  | NADH dehydrogenase (ubiquinone) 1 beta subcomplex, 7                                | No Class |

|              |         |                                                                       |          |
|--------------|---------|-----------------------------------------------------------------------|----------|
| 1448483_a_at | Ndufb2  | NADH dehydrogenase (ubiquinone) 1 beta subcomplex, 2                  | No Class |
| 1416834_x_at | Ndufb2  | NADH dehydrogenase (ubiquinone) 1 beta subcomplex, 2                  | No Class |
| 1427997_at   | Ndufaf4 | NADH dehydrogenase (ubiquinone) 1 alpha subcomplex, assembly factor 4 | No Class |
| 1452923_at   | Ndufaf2 | NADH dehydrogenase (ubiquinone) 1 alpha subcomplex, assembly factor 2 | No Class |
| 1416663_at   | Ndufa9  | NADH dehydrogenase (ubiquinone) 1 alpha subcomplex, 9                 | No Class |
| 1417286_at   | Ndufa5  | NADH dehydrogenase (ubiquinone) 1 alpha subcomplex, 5                 | No Class |
| 1424085_at   | Ndufa4  | NADH dehydrogenase (ubiquinone) 1 alpha subcomplex, 4                 | No Class |
| 1455806_x_at | Ndufa12 | NADH dehydrogenase (ubiquinone) 1 alpha subcomplex, 12                | No Class |
| 1433513_x_at | Ndufa12 | NADH dehydrogenase (ubiquinone) 1 alpha subcomplex, 12                | No Class |
| 1418814_s_at | Ndufa12 | NADH dehydrogenase (ubiquinone) 1 alpha subcomplex, 12                | No Class |
| 1436188_a_at | Ndrg4   | N-myc downstream regulated gene 4                                     | No Class |
| 1426615_s_at | Ndrg4   | N-myc downstream regulated gene 4                                     | No Class |
| 1456174_x_at | Ndrg1   | N-myc downstream regulated gene 1                                     | No Class |
| 1450977_s_at | Ndrg1   | N-myc downstream regulated gene 1                                     | No Class |
| 1450976_at   | Ndrg1   | N-myc downstream regulated gene 1                                     | No Class |
| 1423413_at   | Ndrg1   | N-myc downstream regulated gene 1                                     | No Class |
| 1420760_s_at | Ndrg1   | N-myc downstream regulated gene 1                                     | No Class |
| 1437853_x_at | Ndn     | necdin                                                                | No Class |
| 1435382_at   | Ndn     | necdin                                                                | No Class |
| 1424893_at   | Ndel1   | nuclear distribution gene E-like homolog 1 (A. nidulans)              | No Class |
| 1418570_at   | Ncstn   | nicastrin                                                             | No Class |
| 1415772_at   | Ncl     | nucleolin                                                             | No Class |
| 1444086_at   | Nckap5  | NCK-associated protein 5                                              | No Class |
| 1450847_at   | Ncbp2   | nuclear cap binding protein subunit 2                                 | No Class |
| 1423045_at   | Ncbp2   | nuclear cap binding protein subunit 2                                 | No Class |
| 1433663_s_at | Ncbp1   | nuclear cap binding protein subunit 1                                 | No Class |
| 1423698_at   | Ncaph2  | non-SMC condensin II complex, subunit H2                              | No Class |
| 1429172_a_at | Ncapg   | non-SMC condensin I complex, subunit G                                | No Class |
| 1423847_at   | Ncapd2  | non-SMC condensin I complex, subunit D2                               | No Class |
| 1417569_at   | Ncald   | neurocalcin delta                                                     | No Class |
| 1417568_at   | Ncald   | neurocalcin delta                                                     | No Class |
| 1451897_a_at | Nbr1    | neighbor of Brca1 gene 1                                              | No Class |
| 1456144_at   | Nav3    | neuron navigator 3                                                    | No Class |
| 1442918_at   | Nav3    | neuron navigator 3                                                    | No Class |
| 1418781_at   | Nat9    | N-acetyltransferase 9 (GCN5-related, putative)                        | No Class |
| 1436702_at   | Nat8l   | N-acetyltransferase 8-like                                            | No Class |
| 1435842_at   | Nat8l   | N-acetyltransferase 8-like                                            | No Class |
| 1428666_at   | Nars    | asparaginyl-tRNA synthetase                                           | No Class |
| 1426536_at   | Narg2   | NMDA receptor-regulated gene 2                                        | No Class |
| 1450888_at   | Napb    | N-ethylmaleimide sensitive fusion protein attachment protein beta     | No Class |
| 1423173_at   | Napb    | N-ethylmaleimide sensitive fusion protein attachment protein beta     | No Class |
| 1448243_at   | Napa    | N-ethylmaleimide sensitive fusion protein attachment protein alpha    | No Class |
| 1416192_at   | Napa    | N-ethylmaleimide sensitive fusion protein attachment protein alpha    | No Class |
| 1452778_x_at | Nap11   | nucleosome assembly protein 1-like 1                                  | No Class |
| 1436648_at   | Nanos1  | nanos homolog 1 (Drosophila)                                          | No Class |
| 1455320_at   | Nampt   | nicotinamide phosphoribosyltransferase                                | No Class |
| 1448607_at   | Nampt   | nicotinamide phosphoribosyltransferase                                | No Class |
| 1417190_at   | Nampt   | nicotinamide phosphoribosyltransferase                                | No Class |
| 1421525_a_at | Naip5   | NLR family, apoptosis inhibitory protein 5                            | No Class |
| 1419509_a_at | Nagk    | N-acetylglucosamine kinase                                            | No Class |
| 1452192_at   | Naf1    | nuclear assembly factor 1 homolog (S. cerevisiae)                     | No Class |
| 1429582_at   | Nacc2   | nucleus accumbens associated 2, BEN and BTB (POZ) domain containing   | No Class |
| 1417152_at   | Nacc2   | nucleus accumbens associated 2, BEN and BTB (POZ) domain containing   | No Class |
| 1422671_s_at | Naalad2 | N-acetylated alpha-linked acidic dipeptidase 2                        | No Class |
| 1452067_at   | Naaa    | N-acylethanolamine acid amidase                                       | No Class |
| 1428970_at   | Naa50   | N(alpha)-acetyltransferase 50, NatE catalytic subunit                 | No Class |
| 1428410_at   | Naa50   | N(alpha)-acetyltransferase 50, NatE catalytic subunit                 | No Class |

|                     |       |                                                       |          |
|---------------------|-------|-------------------------------------------------------|----------|
| 1428409_at          | Naa50 | N(alpha)-acetyltransferase 50, NatE catalytic subunit | No Class |
| 1433766_at          | Naa25 | N(alpha)-acetyltransferase 25, NatB auxiliary subunit | No Class |
| AFFX-TrpnX-M_at     | NA    | ---                                                   | No Class |
| AFFX-TrpnX-5_at     | NA    | ---                                                   | No Class |
| AFFX-TrpnX-3_at     | NA    | ---                                                   | No Class |
| AFFX-r2-Bs-phe-M_e  | NA    | ---                                                   | No Class |
| AFFX-r2-Bs-phe-3_at | NA    | ---                                                   | No Class |
| AFFX-r2-Bs-dap-M_e  | NA    | ---                                                   | No Class |
| AFFX-r2-Bs-dap-5_at | NA    | ---                                                   | No Class |
| AFFX-r2-Bs-dap-3_at | NA    | ---                                                   | No Class |
| AFFX-PheX-3_at      | NA    | ---                                                   | No Class |
| AFFX-DapX-5_at      | NA    | ---                                                   | No Class |
| AFFX-BioDn-3_at     | NA    | ---                                                   | No Class |
| AFFX-BioC-5_at      | NA    | ---                                                   | No Class |
| AFFX-BioC-3_at      | NA    | ---                                                   | No Class |
| AFFX-BioB-M_at      | NA    | ---                                                   | No Class |
| 1460268_at          | NA    | ---                                                   | No Class |
| 1460126_at          | NA    | ---                                                   | No Class |
| 1460097_at          | NA    | ---                                                   | No Class |
| 1460060_at          | NA    | ---                                                   | No Class |
| 1460058_at          | NA    | ---                                                   | No Class |
| 1460055_at          | NA    | ---                                                   | No Class |
| 1460047_at          | NA    | ---                                                   | No Class |
| 1460032_at          | NA    | ---                                                   | No Class |
| 1459966_at          | NA    | ---                                                   | No Class |
| 1459920_at          | NA    | ---                                                   | No Class |
| 1459853_x_at        | NA    | ---                                                   | No Class |
| 1459845_at          | NA    | ---                                                   | No Class |
| 1459778_at          | NA    | ---                                                   | No Class |
| 1459734_at          | NA    | ---                                                   | No Class |
| 1459674_at          | NA    | ---                                                   | No Class |
| 1459649_at          | NA    | ---                                                   | No Class |
| 1459635_at          | NA    | ---                                                   | No Class |
| 1459632_at          | NA    | ---                                                   | No Class |
| 1459628_at          | NA    | ---                                                   | No Class |
| 1459623_at          | NA    | ---                                                   | No Class |
| 1459618_at          | NA    | ---                                                   | No Class |
| 1459576_at          | NA    | ---                                                   | No Class |
| 1459557_at          | NA    | ---                                                   | No Class |
| 1459488_at          | NA    | ---                                                   | No Class |
| 1459461_at          | NA    | ---                                                   | No Class |
| 1459460_at          | NA    | ---                                                   | No Class |
| 1459425_at          | NA    | ---                                                   | No Class |
| 1459420_at          | NA    | ---                                                   | No Class |
| 1459406_at          | NA    | ---                                                   | No Class |
| 1459381_at          | NA    | ---                                                   | No Class |
| 1459362_at          | NA    | ---                                                   | No Class |
| 1459360_at          | NA    | ---                                                   | No Class |
| 1459358_at          | NA    | ---                                                   | No Class |
| 1459315_at          | NA    | ---                                                   | No Class |
| 1459295_at          | NA    | ---                                                   | No Class |
| 1459266_at          | NA    | ---                                                   | No Class |
| 1459237_at          | NA    | ---                                                   | No Class |
| 1459219_at          | NA    | ---                                                   | No Class |
| 1459201_at          | NA    | ---                                                   | No Class |
| 1459196_at          | NA    | ---                                                   | No Class |
| 1459182_at          | NA    | ---                                                   | No Class |

|              |    |     |          |
|--------------|----|-----|----------|
| 1459170_at   | NA | --- | No Class |
| 1459154_at   | NA | --- | No Class |
| 1459150_at   | NA | --- | No Class |
| 1459127_at   | NA | --- | No Class |
| 1459094_at   | NA | --- | No Class |
| 1459090_at   | NA | --- | No Class |
| 1459071_at   | NA | --- | No Class |
| 1459070_at   | NA | --- | No Class |
| 1459069_at   | NA | --- | No Class |
| 1459063_at   | NA | --- | No Class |
| 1459060_at   | NA | --- | No Class |
| 1459036_at   | NA | --- | No Class |
| 1459021_at   | NA | --- | No Class |
| 1459008_at   | NA | --- | No Class |
| 1459005_at   | NA | --- | No Class |
| 1458994_at   | NA | --- | No Class |
| 1458991_at   | NA | --- | No Class |
| 1458974_at   | NA | --- | No Class |
| 1458950_at   | NA | --- | No Class |
| 1458943_at   | NA | --- | No Class |
| 1458927_at   | NA | --- | No Class |
| 1458893_at   | NA | --- | No Class |
| 1458857_at   | NA | --- | No Class |
| 1458852_at   | NA | --- | No Class |
| 1458835_at   | NA | --- | No Class |
| 1458821_at   | NA | --- | No Class |
| 1458809_at   | NA | --- | No Class |
| 1458773_at   | NA | --- | No Class |
| 1458740_at   | NA | --- | No Class |
| 1458738_at   | NA | --- | No Class |
| 1458722_at   | NA | --- | No Class |
| 1458720_at   | NA | --- | No Class |
| 1458718_at   | NA | --- | No Class |
| 1458703_at   | NA | --- | No Class |
| 1458663_at   | NA | --- | No Class |
| 1458655_at   | NA | --- | No Class |
| 1458639_at   | NA | --- | No Class |
| 1458637_x_at | NA | --- | No Class |
| 1458618_at   | NA | --- | No Class |
| 1458616_at   | NA | --- | No Class |
| 1458599_at   | NA | --- | No Class |
| 1458589_at   | NA | --- | No Class |
| 1458586_at   | NA | --- | No Class |
| 1458543_at   | NA | --- | No Class |
| 1458542_at   | NA | --- | No Class |
| 1458526_at   | NA | --- | No Class |
| 1458521_at   | NA | --- | No Class |
| 1458509_at   | NA | --- | No Class |
| 1458497_at   | NA | --- | No Class |
| 1458496_at   | NA | --- | No Class |
| 1458470_at   | NA | --- | No Class |
| 1458425_at   | NA | --- | No Class |
| 1458302_at   | NA | --- | No Class |
| 1458296_at   | NA | --- | No Class |
| 1458294_at   | NA | --- | No Class |
| 1458282_at   | NA | --- | No Class |
| 1458280_at   | NA | --- | No Class |

|            |    |     |          |
|------------|----|-----|----------|
| 1458279_at | NA | --- | No Class |
| 1458241_at | NA | --- | No Class |
| 1458227_at | NA | --- | No Class |
| 1458206_at | NA | --- | No Class |
| 1458205_at | NA | --- | No Class |
| 1458166_at | NA | --- | No Class |
| 1458077_at | NA | --- | No Class |
| 1458076_at | NA | --- | No Class |
| 1458043_at | NA | --- | No Class |
| 1458039_at | NA | --- | No Class |
| 1458037_at | NA | --- | No Class |
| 1457978_at | NA | --- | No Class |
| 1457971_at | NA | --- | No Class |
| 1457944_at | NA | --- | No Class |
| 1457934_at | NA | --- | No Class |
| 1457910_at | NA | --- | No Class |
| 1457870_at | NA | --- | No Class |
| 1457851_at | NA | --- | No Class |
| 1457842_at | NA | --- | No Class |
| 1457837_at | NA | --- | No Class |
| 1457814_at | NA | --- | No Class |
| 1457723_at | NA | --- | No Class |
| 1457719_at | NA | --- | No Class |
| 1457692_at | NA | --- | No Class |
| 1457586_at | NA | --- | No Class |
| 1457559_at | NA | --- | No Class |
| 1457549_at | NA | --- | No Class |
| 1457532_at | NA | --- | No Class |
| 1457510_at | NA | --- | No Class |
| 1457503_at | NA | --- | No Class |
| 1457480_at | NA | --- | No Class |
| 1457479_at | NA | --- | No Class |
| 1457470_at | NA | --- | No Class |
| 1457451_at | NA | --- | No Class |
| 1457438_at | NA | --- | No Class |
| 1457430_at | NA | --- | No Class |
| 1457398_at | NA | --- | No Class |
| 1457376_at | NA | --- | No Class |
| 1457370_at | NA | --- | No Class |
| 1457367_at | NA | --- | No Class |
| 1457349_at | NA | --- | No Class |
| 1457339_at | NA | --- | No Class |
| 1457324_at | NA | --- | No Class |
| 1457266_at | NA | --- | No Class |
| 1457216_at | NA | --- | No Class |
| 1457176_at | NA | --- | No Class |
| 1457171_at | NA | --- | No Class |
| 1457122_at | NA | --- | No Class |
| 1457114_at | NA | --- | No Class |
| 1457108_at | NA | --- | No Class |
| 1457107_at | NA | --- | No Class |
| 1457007_at | NA | --- | No Class |
| 1456965_at | NA | --- | No Class |
| 1456955_at | NA | --- | No Class |
| 1456952_at | NA | --- | No Class |
| 1456949_at | NA | --- | No Class |
| 1456906_at | NA | --- | No Class |

|            |    |     |          |
|------------|----|-----|----------|
| 1456893_at | NA | --- | No Class |
| 1456868_at | NA | --- | No Class |
| 1456849_at | NA | --- | No Class |
| 1456832_at | NA | --- | No Class |
| 1456825_at | NA | --- | No Class |
| 1456686_at | NA | --- | No Class |
| 1456679_at | NA | --- | No Class |
| 1456678_at | NA | --- | No Class |
| 1456661_at | NA | --- | No Class |
| 1456547_at | NA | --- | No Class |
| 1456521_at | NA | --- | No Class |
| 1456514_at | NA | --- | No Class |
| 1456414_at | NA | --- | No Class |
| 1456396_at | NA | --- | No Class |
| 1456319_at | NA | --- | No Class |
| 1456303_at | NA | --- | No Class |
| 1456272_at | NA | --- | No Class |
| 1454401_at | NA | --- | No Class |
| 1454367_at | NA | --- | No Class |
| 1453100_at | NA | --- | No Class |
| 1449806_at | NA | --- | No Class |
| 1449745_at | NA | --- | No Class |
| 1449717_at | NA | --- | No Class |
| 1449667_at | NA | --- | No Class |
| 1449642_at | NA | --- | No Class |
| 1449639_at | NA | --- | No Class |
| 1449625_at | NA | --- | No Class |
| 1449609_at | NA | --- | No Class |
| 1447921_at | NA | --- | No Class |
| 1447615_at | NA | --- | No Class |
| 1447590_at | NA | --- | No Class |
| 1447472_at | NA | --- | No Class |
| 1447443_at | NA | --- | No Class |
| 1447442_at | NA | --- | No Class |
| 1447438_at | NA | --- | No Class |
| 1447429_at | NA | --- | No Class |
| 1447421_at | NA | --- | No Class |
| 1447408_at | NA | --- | No Class |
| 1447402_at | NA | --- | No Class |
| 1447399_at | NA | --- | No Class |
| 1447344_at | NA | --- | No Class |
| 1447328_at | NA | --- | No Class |
| 1447325_at | NA | --- | No Class |
| 1447314_at | NA | --- | No Class |
| 1447312_at | NA | --- | No Class |
| 1447281_at | NA | --- | No Class |
| 1447274_at | NA | --- | No Class |
| 1447270_at | NA | --- | No Class |
| 1447242_at | NA | --- | No Class |
| 1447240_at | NA | --- | No Class |
| 1447231_at | NA | --- | No Class |
| 1447213_at | NA | --- | No Class |
| 1447174_at | NA | --- | No Class |
| 1447166_at | NA | --- | No Class |
| 1447156_at | NA | --- | No Class |
| 1447147_at | NA | --- | No Class |
| 1447143_at | NA | --- | No Class |



|            |    |     |          |
|------------|----|-----|----------|
| 1447131_at | NA | --- | No Class |
| 1447121_at | NA | --- | No Class |
| 1447109_at | NA | --- | No Class |
| 1447108_at | NA | --- | No Class |
| 1447104_at | NA | --- | No Class |
| 1447052_at | NA | --- | No Class |
| 1447040_at | NA | --- | No Class |
| 1446955_at | NA | --- | No Class |
| 1446950_at | NA | --- | No Class |
| 1446923_at | NA | --- | No Class |
| 1446904_at | NA | --- | No Class |
| 1446892_at | NA | --- | No Class |
| 1446874_at | NA | --- | No Class |
| 1446816_at | NA | --- | No Class |
| 1446780_at | NA | --- | No Class |
| 1446735_at | NA | --- | No Class |
| 1446730_at | NA | --- | No Class |
| 1446720_at | NA | --- | No Class |
| 1446692_at | NA | --- | No Class |
| 1446688_at | NA | --- | No Class |
| 1446682_at | NA | --- | No Class |
| 1446674_at | NA | --- | No Class |
| 1446656_at | NA | --- | No Class |
| 1446621_at | NA | --- | No Class |
| 1446611_at | NA | --- | No Class |
| 1446600_at | NA | --- | No Class |
| 1446578_at | NA | --- | No Class |
| 1446571_at | NA | --- | No Class |
| 1446568_at | NA | --- | No Class |
| 1446521_at | NA | --- | No Class |
| 1446518_at | NA | --- | No Class |
| 1446510_at | NA | --- | No Class |
| 1446480_at | NA | --- | No Class |
| 1446447_at | NA | --- | No Class |
| 1446431_at | NA | --- | No Class |
| 1446417_at | NA | --- | No Class |
| 1446413_at | NA | --- | No Class |
| 1446397_at | NA | --- | No Class |
| 1446327_at | NA | --- | No Class |
| 1446296_at | NA | --- | No Class |
| 1446278_at | NA | --- | No Class |
| 1446275_at | NA | --- | No Class |
| 1446254_at | NA | --- | No Class |
| 1446245_at | NA | --- | No Class |
| 1446240_at | NA | --- | No Class |
| 1446234_at | NA | --- | No Class |
| 1446213_at | NA | --- | No Class |
| 1446205_at | NA | --- | No Class |
| 1446182_at | NA | --- | No Class |
| 1446173_at | NA | --- | No Class |
| 1446172_at | NA | --- | No Class |
| 1446153_at | NA | --- | No Class |
| 1446138_at | NA | --- | No Class |
| 1446090_at | NA | --- | No Class |
| 1446055_at | NA | --- | No Class |
| 1446016_at | NA | --- | No Class |
| 1446014_at | NA | --- | No Class |

|              |    |     |          |
|--------------|----|-----|----------|
| 1446009_at   | NA | --- | No Class |
| 1445986_at   | NA | --- | No Class |
| 1445963_at   | NA | --- | No Class |
| 1445917_at   | NA | --- | No Class |
| 1445884_at   | NA | --- | No Class |
| 1445845_at   | NA | --- | No Class |
| 1445842_at   | NA | --- | No Class |
| 1445779_at   | NA | --- | No Class |
| 1445734_at   | NA | --- | No Class |
| 1445692_x_at | NA | --- | No Class |
| 1445683_at   | NA | --- | No Class |
| 1445679_at   | NA | --- | No Class |
| 1445651_at   | NA | --- | No Class |
| 1445646_at   | NA | --- | No Class |
| 1445640_at   | NA | --- | No Class |
| 1445612_at   | NA | --- | No Class |
| 1445610_at   | NA | --- | No Class |
| 1445559_at   | NA | --- | No Class |
| 1445518_at   | NA | --- | No Class |
| 1445492_at   | NA | --- | No Class |
| 1445398_at   | NA | --- | No Class |
| 1445377_at   | NA | --- | No Class |
| 1445346_at   | NA | --- | No Class |
| 1445332_at   | NA | --- | No Class |
| 1445289_at   | NA | --- | No Class |
| 1445285_at   | NA | --- | No Class |
| 1445254_at   | NA | --- | No Class |
| 1445230_at   | NA | --- | No Class |
| 1445224_at   | NA | --- | No Class |
| 1445073_at   | NA | --- | No Class |
| 1445031_at   | NA | --- | No Class |
| 1445008_at   | NA | --- | No Class |
| 1445001_at   | NA | --- | No Class |
| 1444983_at   | NA | --- | No Class |
| 1444963_at   | NA | --- | No Class |
| 1444928_at   | NA | --- | No Class |
| 1444910_at   | NA | --- | No Class |
| 1444875_at   | NA | --- | No Class |
| 1444856_at   | NA | --- | No Class |
| 1444854_at   | NA | --- | No Class |
| 1444848_at   | NA | --- | No Class |
| 1444831_at   | NA | --- | No Class |
| 1444830_at   | NA | --- | No Class |
| 1444806_at   | NA | --- | No Class |
| 1444774_at   | NA | --- | No Class |
| 1444622_at   | NA | --- | No Class |
| 1444620_at   | NA | --- | No Class |
| 1444609_at   | NA | --- | No Class |
| 1444598_at   | NA | --- | No Class |
| 1444562_at   | NA | --- | No Class |
| 1444557_at   | NA | --- | No Class |
| 1444556_at   | NA | --- | No Class |
| 1444545_at   | NA | --- | No Class |
| 1444541_at   | NA | --- | No Class |
| 1444515_at   | NA | --- | No Class |
| 1444506_at   | NA | --- | No Class |
| 1444498_at   | NA | --- | No Class |

|              |    |     |          |
|--------------|----|-----|----------|
| 1444475_at   | NA | --- | No Class |
| 1444430_at   | NA | --- | No Class |
| 1444361_at   | NA | --- | No Class |
| 1444344_at   | NA | --- | No Class |
| 1444246_at   | NA | --- | No Class |
| 1444222_x_at | NA | --- | No Class |
| 1444195_at   | NA | --- | No Class |
| 1444190_at   | NA | --- | No Class |
| 1444167_at   | NA | --- | No Class |
| 1444164_at   | NA | --- | No Class |
| 1444159_at   | NA | --- | No Class |
| 1444144_at   | NA | --- | No Class |
| 1444130_at   | NA | --- | No Class |
| 1444098_at   | NA | --- | No Class |
| 1444057_at   | NA | --- | No Class |
| 1444034_at   | NA | --- | No Class |
| 1444021_at   | NA | --- | No Class |
| 1444017_at   | NA | --- | No Class |
| 1444005_at   | NA | --- | No Class |
| 1443949_at   | NA | --- | No Class |
| 1443885_at   | NA | --- | No Class |
| 1443834_at   | NA | --- | No Class |
| 1443818_at   | NA | --- | No Class |
| 1443802_at   | NA | --- | No Class |
| 1443742_x_at | NA | --- | No Class |
| 1443739_at   | NA | --- | No Class |
| 1443663_at   | NA | --- | No Class |
| 1443653_at   | NA | --- | No Class |
| 1443649_at   | NA | --- | No Class |
| 1443624_at   | NA | --- | No Class |
| 1443613_x_at | NA | --- | No Class |
| 1443603_at   | NA | --- | No Class |
| 1443599_at   | NA | --- | No Class |
| 1443578_at   | NA | --- | No Class |
| 1443530_at   | NA | --- | No Class |
| 1443526_at   | NA | --- | No Class |
| 1443521_at   | NA | --- | No Class |
| 1443513_at   | NA | --- | No Class |
| 1443512_at   | NA | --- | No Class |
| 1443511_at   | NA | --- | No Class |
| 1443491_at   | NA | --- | No Class |
| 1443468_at   | NA | --- | No Class |
| 1443452_at   | NA | --- | No Class |
| 1443451_at   | NA | --- | No Class |
| 1443438_at   | NA | --- | No Class |
| 1443418_at   | NA | --- | No Class |
| 1443394_at   | NA | --- | No Class |
| 1443364_at   | NA | --- | No Class |
| 1443355_at   | NA | --- | No Class |
| 1443338_at   | NA | --- | No Class |
| 1443337_at   | NA | --- | No Class |
| 1443336_at   | NA | --- | No Class |
| 1443284_at   | NA | --- | No Class |
| 1443279_at   | NA | --- | No Class |
| 1443271_at   | NA | --- | No Class |
| 1443254_at   | NA | --- | No Class |
| 1443238_at   | NA | --- | No Class |

|            |    |     |          |
|------------|----|-----|----------|
| 1443233_at | NA | --- | No Class |
| 1443231_at | NA | --- | No Class |
| 1443230_at | NA | --- | No Class |
| 1443216_at | NA | --- | No Class |
| 1443212_at | NA | --- | No Class |
| 1443190_at | NA | --- | No Class |
| 1443182_at | NA | --- | No Class |
| 1443180_at | NA | --- | No Class |
| 1443169_at | NA | --- | No Class |
| 1443162_at | NA | --- | No Class |
| 1443161_at | NA | --- | No Class |
| 1443104_at | NA | --- | No Class |
| 1443100_at | NA | --- | No Class |
| 1443093_at | NA | --- | No Class |
| 1443075_at | NA | --- | No Class |
| 1443035_at | NA | --- | No Class |
| 1443012_at | NA | --- | No Class |
| 1443010_at | NA | --- | No Class |
| 1443007_at | NA | --- | No Class |
| 1442986_at | NA | --- | No Class |
| 1442977_at | NA | --- | No Class |
| 1442976_at | NA | --- | No Class |
| 1442964_at | NA | --- | No Class |
| 1442928_at | NA | --- | No Class |
| 1442906_at | NA | --- | No Class |
| 1442893_at | NA | --- | No Class |
| 1442876_at | NA | --- | No Class |
| 1442861_at | NA | --- | No Class |
| 1442839_at | NA | --- | No Class |
| 1442834_at | NA | --- | No Class |
| 1442785_at | NA | --- | No Class |
| 1442723_at | NA | --- | No Class |
| 1442721_at | NA | --- | No Class |
| 1442720_at | NA | --- | No Class |
| 1442710_at | NA | --- | No Class |
| 1442708_at | NA | --- | No Class |
| 1442699_at | NA | --- | No Class |
| 1442679_at | NA | --- | No Class |
| 1442671_at | NA | --- | No Class |
| 1442670_at | NA | --- | No Class |
| 1442664_at | NA | --- | No Class |
| 1442646_at | NA | --- | No Class |
| 1442632_at | NA | --- | No Class |
| 1442625_at | NA | --- | No Class |
| 1442605_at | NA | --- | No Class |
| 1442595_at | NA | --- | No Class |
| 1442556_at | NA | --- | No Class |
| 1442519_at | NA | --- | No Class |
| 1442495_at | NA | --- | No Class |
| 1442442_at | NA | --- | No Class |
| 1442435_at | NA | --- | No Class |
| 1442427_at | NA | --- | No Class |
| 1442420_at | NA | --- | No Class |
| 1442401_at | NA | --- | No Class |
| 1442400_at | NA | --- | No Class |
| 1442383_at | NA | --- | No Class |
| 1442375_at | NA | --- | No Class |

|              |    |     |          |
|--------------|----|-----|----------|
| 1442332_at   | NA | --- | No Class |
| 1442323_at   | NA | --- | No Class |
| 1442322_at   | NA | --- | No Class |
| 1442283_at   | NA | --- | No Class |
| 1442276_at   | NA | --- | No Class |
| 1442224_at   | NA | --- | No Class |
| 1442217_at   | NA | --- | No Class |
| 1442197_at   | NA | --- | No Class |
| 1442132_at   | NA | --- | No Class |
| 1442109_at   | NA | --- | No Class |
| 1442086_at   | NA | --- | No Class |
| 1442068_at   | NA | --- | No Class |
| 1442053_at   | NA | --- | No Class |
| 1442052_at   | NA | --- | No Class |
| 1442025_a_at | NA | --- | No Class |
| 1441971_at   | NA | --- | No Class |
| 1441896_x_at | NA | --- | No Class |
| 1441872_x_at | NA | --- | No Class |
| 1441821_at   | NA | --- | No Class |
| 1441818_at   | NA | --- | No Class |
| 1441786_at   | NA | --- | No Class |
| 1441771_at   | NA | --- | No Class |
| 1441769_at   | NA | --- | No Class |
| 1441756_at   | NA | --- | No Class |
| 1441740_at   | NA | --- | No Class |
| 1441718_at   | NA | --- | No Class |
| 1441710_at   | NA | --- | No Class |
| 1441696_at   | NA | --- | No Class |
| 1441677_at   | NA | --- | No Class |
| 1441671_at   | NA | --- | No Class |
| 1441670_at   | NA | --- | No Class |
| 1441649_at   | NA | --- | No Class |
| 1441642_at   | NA | --- | No Class |
| 1441635_at   | NA | --- | No Class |
| 1441629_at   | NA | --- | No Class |
| 1441612_at   | NA | --- | No Class |
| 1441597_at   | NA | --- | No Class |
| 1441584_at   | NA | --- | No Class |
| 1441580_at   | NA | --- | No Class |
| 1441576_at   | NA | --- | No Class |
| 1441574_at   | NA | --- | No Class |
| 1441530_at   | NA | --- | No Class |
| 1441521_at   | NA | --- | No Class |
| 1441505_at   | NA | --- | No Class |
| 1441498_at   | NA | --- | No Class |
| 1441389_at   | NA | --- | No Class |
| 1441386_at   | NA | --- | No Class |
| 1441351_at   | NA | --- | No Class |
| 1441310_at   | NA | --- | No Class |
| 1441301_at   | NA | --- | No Class |
| 1441283_at   | NA | --- | No Class |
| 1441253_at   | NA | --- | No Class |
| 1441230_at   | NA | --- | No Class |
| 1441217_at   | NA | --- | No Class |
| 1441153_at   | NA | --- | No Class |
| 1441152_at   | NA | --- | No Class |
| 1441056_at   | NA | --- | No Class |

|              |    |     |          |
|--------------|----|-----|----------|
| 1441050_at   | NA | --- | No Class |
| 1441037_at   | NA | --- | No Class |
| 1440977_at   | NA | --- | No Class |
| 1440952_at   | NA | --- | No Class |
| 1440948_at   | NA | --- | No Class |
| 1440753_at   | NA | --- | No Class |
| 1440723_at   | NA | --- | No Class |
| 1440712_at   | NA | --- | No Class |
| 1440695_at   | NA | --- | No Class |
| 1440690_at   | NA | --- | No Class |
| 1440685_at   | NA | --- | No Class |
| 1440654_at   | NA | --- | No Class |
| 1440651_at   | NA | --- | No Class |
| 1440650_at   | NA | --- | No Class |
| 1440621_at   | NA | --- | No Class |
| 1440590_at   | NA | --- | No Class |
| 1440578_at   | NA | --- | No Class |
| 1440567_at   | NA | --- | No Class |
| 1440560_at   | NA | --- | No Class |
| 1440551_at   | NA | --- | No Class |
| 1440548_at   | NA | --- | No Class |
| 1440498_at   | NA | --- | No Class |
| 1440461_at   | NA | --- | No Class |
| 1440434_at   | NA | --- | No Class |
| 1440373_at   | NA | --- | No Class |
| 1440284_at   | NA | --- | No Class |
| 1440274_at   | NA | --- | No Class |
| 1440212_at   | NA | --- | No Class |
| 1440188_at   | NA | --- | No Class |
| 1440127_a_at | NA | --- | No Class |
| 1440095_at   | NA | --- | No Class |
| 1440092_at   | NA | --- | No Class |
| 1440078_at   | NA | --- | No Class |
| 1440055_at   | NA | --- | No Class |
| 1440041_at   | NA | --- | No Class |
| 1440040_at   | NA | --- | No Class |
| 1440039_at   | NA | --- | No Class |
| 1440033_at   | NA | --- | No Class |
| 1440026_at   | NA | --- | No Class |
| 1440015_at   | NA | --- | No Class |
| 1440013_at   | NA | --- | No Class |
| 1440012_at   | NA | --- | No Class |
| 1440011_at   | NA | --- | No Class |
| 1440010_at   | NA | --- | No Class |
| 1439970_at   | NA | --- | No Class |
| 1439964_at   | NA | --- | No Class |
| 1439944_at   | NA | --- | No Class |
| 1439901_at   | NA | --- | No Class |
| 1439886_at   | NA | --- | No Class |
| 1439852_at   | NA | --- | No Class |
| 1439820_at   | NA | --- | No Class |
| 1439743_at   | NA | --- | No Class |
| 1439734_at   | NA | --- | No Class |
| 1439722_at   | NA | --- | No Class |
| 1439678_at   | NA | --- | No Class |
| 1439652_at   | NA | --- | No Class |
| 1439572_at   | NA | --- | No Class |

|              |    |     |          |
|--------------|----|-----|----------|
| 1439545_at   | NA | --- | No Class |
| 1439497_at   | NA | --- | No Class |
| 1439469_at   | NA | --- | No Class |
| 1439361_at   | NA | --- | No Class |
| 1439343_at   | NA | --- | No Class |
| 1439339_at   | NA | --- | No Class |
| 1439321_at   | NA | --- | No Class |
| 1439312_at   | NA | --- | No Class |
| 1439301_at   | NA | --- | No Class |
| 1439298_at   | NA | --- | No Class |
| 1439287_at   | NA | --- | No Class |
| 1439233_at   | NA | --- | No Class |
| 1439224_at   | NA | --- | No Class |
| 1439191_at   | NA | --- | No Class |
| 1439169_at   | NA | --- | No Class |
| 1439136_at   | NA | --- | No Class |
| 1439135_at   | NA | --- | No Class |
| 1439123_at   | NA | --- | No Class |
| 1438995_at   | NA | --- | No Class |
| 1438981_at   | NA | --- | No Class |
| 1438929_at   | NA | --- | No Class |
| 1438906_at   | NA | --- | No Class |
| 1438864_at   | NA | --- | No Class |
| 1438823_at   | NA | --- | No Class |
| 1438762_at   | NA | --- | No Class |
| 1438611_at   | NA | --- | No Class |
| 1438605_at   | NA | --- | No Class |
| 1438593_at   | NA | --- | No Class |
| 1438577_at   | NA | --- | No Class |
| 1438576_x_at | NA | --- | No Class |
| 1438575_a_at | NA | --- | No Class |
| 1438570_at   | NA | --- | No Class |
| 1438508_at   | NA | --- | No Class |
| 1438398_at   | NA | --- | No Class |
| 1438331_at   | NA | --- | No Class |
| 1438259_at   | NA | --- | No Class |
| 1438245_at   | NA | --- | No Class |
| 1438235_at   | NA | --- | No Class |
| 1438106_at   | NA | --- | No Class |
| 1438072_at   | NA | --- | No Class |
| 1438066_at   | NA | --- | No Class |
| 1438027_at   | NA | --- | No Class |
| 1437883_s_at | NA | --- | No Class |
| 1437854_at   | NA | --- | No Class |
| 1437821_at   | NA | --- | No Class |
| 1437796_at   | NA | --- | No Class |
| 1437598_at   | NA | --- | No Class |
| 1437541_at   | NA | --- | No Class |
| 1437420_at   | NA | --- | No Class |
| 1437003_at   | NA | --- | No Class |
| 1436933_at   | NA | --- | No Class |
| 1436864_at   | NA | --- | No Class |
| 1436636_at   | NA | --- | No Class |
| 1436459_at   | NA | --- | No Class |
| 1436441_at   | NA | --- | No Class |
| 1436218_at   | NA | --- | No Class |
| 1436061_at   | NA | --- | No Class |

|              |         |                                                         |          |
|--------------|---------|---------------------------------------------------------|----------|
| 1435845_at   | NA      | ---                                                     | No Class |
| 1435579_at   | NA      | ---                                                     | No Class |
| 1435046_at   | NA      | ---                                                     | No Class |
| 1434280_at   | NA      | ---                                                     | No Class |
| 1434279_at   | NA      | ---                                                     | No Class |
| 1433898_at   | NA      | ---                                                     | No Class |
| 1433813_at   | NA      | ---                                                     | No Class |
| 1433204_at   | NA      | ---                                                     | No Class |
| 1432864_at   | NA      | ---                                                     | No Class |
| 1432742_at   | NA      | ---                                                     | No Class |
| 1432636_at   | NA      | ---                                                     | No Class |
| 1431677_at   | NA      | ---                                                     | No Class |
| 1431158_at   | NA      | ---                                                     | No Class |
| 1430710_at   | NA      | ---                                                     | No Class |
| 1430702_at   | NA      | ---                                                     | No Class |
| 1429277_at   | NA      | ---                                                     | No Class |
| 1427825_at   | NA      | ---                                                     | No Class |
| 1427819_at   | NA      | ---                                                     | No Class |
| 1427809_at   | NA      | ---                                                     | No Class |
| 1427803_at   | NA      | ---                                                     | No Class |
| 1427594_at   | NA      | ---                                                     | No Class |
| 1427437_at   | NA      | ---                                                     | No Class |
| 1425471_x_at | NA      | ---                                                     | No Class |
| 1425470_at   | NA      | ---                                                     | No Class |
| 1425174_at   | NA      | ---                                                     | No Class |
| 1420310_at   | NA      | ---                                                     | No Class |
| 1420233_at   | NA      | ---                                                     | No Class |
| 1420208_at   | NA      | ---                                                     | No Class |
| 1420195_at   | NA      | ---                                                     | No Class |
| 1420075_at   | NA      | ---                                                     | No Class |
| 1419982_s_at | NA      | ---                                                     | No Class |
| 1419935_s_at | NA      | ---                                                     | No Class |
| 1419858_at   | NA      | ---                                                     | No Class |
| 1418386_at   | N6amt2  | N-6 adenine-specific DNA methyltransferase 2 (putative) | No Class |
| 1444924_at   | N4bp2l2 | NEDD4 binding protein 2-like 2                          | No Class |
| 1434394_at   | N4bp2   | NEDD4 binding protein 2                                 | No Class |
| 1430599_at   | Myt1l   | myelin transcription factor 1-like                      | No Class |
| 1447631_at   | Myst2   | MYST histone acetyltransferase 2                        | No Class |
| 1460159_at   | Mysm1   | myb-like, SWIRM and MPN domains 1                       | No Class |
| 1441551_at   | Mypn    | myopalladin                                             | No Class |
| 1425808_a_at | Myocd   | myocardin                                               | No Class |
| 1438533_at   | Myo9b   | myosin IXb                                              | No Class |
| 1459991_at   | Myo9a   | myosin IXa                                              | No Class |
| 1436307_at   | Myo9a   | myosin IXa                                              | No Class |
| 1441104_at   | Myo5b   | myosin VB                                               | No Class |
| 1436051_at   | Myo5a   | myosin VA                                               | No Class |
| 1431320_a_at | Myo5a   | myosin VA                                               | No Class |
| 1419754_at   | Myo5a   | myosin VA                                               | No Class |
| 1427892_at   | Myo1g   | myosin IG                                               | No Class |
| 1429525_s_at | Myo1f   | myosin IF                                               | No Class |
| 1429524_at   | Myo1f   | myosin IF                                               | No Class |
| 1421618_at   | Myo1f   | myosin IF                                               | No Class |
| 1458550_at   | Myo1d   | myosin ID                                               | No Class |
| 1449551_at   | Myo1c   | myosin IC                                               | No Class |
| 1449550_at   | Myo1c   | myosin IC                                               | No Class |
| 1419649_s_at | Myo1c   | myosin IC                                               | No Class |
| 1419648_at   | Myo1c   | myosin IC                                               | No Class |



|              |        |                                                                                                     |          |
|--------------|--------|-----------------------------------------------------------------------------------------------------|----------|
| 1459679_s_at | Myo1b  | myosin IB                                                                                           | No Class |
| 1448990_a_at | Myo1b  | myosin IB                                                                                           | No Class |
| 1448989_a_at | Myo1b  | myosin IB                                                                                           | No Class |
| 1427450_x_at | Myo1b  | myosin IB                                                                                           | No Class |
| 1454731_at   | Myo10  | myosin X                                                                                            | No Class |
| 1450650_at   | Myo10  | myosin X                                                                                            | No Class |
| 1422544_at   | Myo10  | myosin X                                                                                            | No Class |
| 1450204_a_at | Mynn   | myoneurin                                                                                           | No Class |
| 1421334_x_at | Mynn   | myoneurin                                                                                           | No Class |
| 1421333_a_at | Mynn   | myoneurin                                                                                           | No Class |
| 1427556_at   | Mylk2  | myosin, light polypeptide kinase 2, skeletal muscle                                                 | No Class |
| 1449071_at   | Myl7   | myosin, light polypeptide 7, regulatory                                                             | No Class |
| 1457126_at   | Myl4   | myosin, light polypeptide 4                                                                         | No Class |
| 1452740_at   | Myh10  | myosin, heavy polypeptide 10, non-muscle                                                            | No Class |
| 1424088_at   | Myg1   | melanocyte proliferating gene 1                                                                     | No Class |
| 1425349_a_at | Myef2  | myelin basic protein expression factor 2, repressor                                                 | No Class |
| 1447584_s_at | Myct1  | myc target 1                                                                                        | No Class |
| 1454900_s_at | Mycbp2 | MYC binding protein 2                                                                               | No Class |
| 1434937_at   | Mycbp2 | MYC binding protein 2                                                                               | No Class |
| 1434274_at   | Mycbp2 | MYC binding protein 2                                                                               | No Class |
| 1424942_a_at | Myc    | myelocytomatosis oncogene                                                                           | No Class |
| 1450194_a_at | Myb    | myeloblastosis oncogene                                                                             | No Class |
| 1421317_x_at | Myb    | myeloblastosis oncogene                                                                             | No Class |
| 1422574_at   | Mxd4   | Max dimerization protein 4                                                                          | No Class |
| 1455104_at   | Mxd1   | MAX dimerization protein 1                                                                          | No Class |
| 1422002_at   | Mxd1   | MAX dimerization protein 1                                                                          | No Class |
| 1456586_x_at | Mvp    | major vault protein                                                                                 | No Class |
| 1451401_a_at | Mul1   | mitochondrial ubiquitin ligase activator of NFKB 1                                                  | No Class |
| 1434118_at   | Mul1   | mitochondrial ubiquitin ligase activator of NFKB 1                                                  | No Class |
| 1427626_at   | Muc5b  | mucin 5, subtype B, tracheobronchial                                                                | No Class |
| 1420475_at   | Mtpn   | myotrophin                                                                                          | No Class |
| 1420474_at   | Mtpn   | myotrophin                                                                                          | No Class |
| 1420473_at   | Mtpn   | myotrophin                                                                                          | No Class |
| 1420472_at   | Mtpn   | myotrophin                                                                                          | No Class |
| 1416991_at   | Mto1   | mitochondrial translation optimization 1 homolog (S. cerevisiae)                                    | No Class |
| 1447831_s_at | Mtmr7  | myotubularin related protein 7                                                                      | No Class |
| 1451726_at   | Mtmr6  | myotubularin related protein 6                                                                      | No Class |
| 1460550_at   | Mtmr11 | myotubularin related protein 11                                                                     | No Class |
| 1441835_x_at | Mtmr11 | myotubularin related protein 11                                                                     | No Class |
| 1434278_at   | Mtm1   | X-linked myotubular myopathy gene 1                                                                 | No Class |
| 1416934_at   | Mtm1   | X-linked myotubular myopathy gene 1                                                                 | No Class |
| 1443021_at   | Mthfs  | 5, 10-methenyltetrahydrofolate synthetase                                                           | No Class |
| 1415917_at   | Mthfd1 | methylenetetrahydrofolate dehydrogenase (NADP+ dependent), methylenetetrahydrofolate cyclohydrolase | No Class |
| 1449115_at   | Mtf2   | metal response element binding transcription factor 2                                               | No Class |
| 1418516_at   | Mtf2   | metal response element binding transcription factor 2                                               | No Class |
| 1418515_at   | Mtf2   | metal response element binding transcription factor 2                                               | No Class |
| 1418514_at   | Mtf2   | metal response element binding transcription factor 2                                               | No Class |
| 1458638_at   | Mtdh   | metadherin                                                                                          | No Class |
| 1434882_at   | Mtdh   | metadherin                                                                                          | No Class |
| 1460718_s_at | Mtch1  | mitochondrial carrier homolog 1 (C. elegans)                                                        | No Class |
| 1448638_at   | Mtbp   | Mdm2, transformed 3T3 cell double minute p53 binding protein                                        | No Class |
| 1437855_at   | Mtap4  | microtubule-associated protein 4                                                                    | No Class |
| 1417295_at   | Mta1   | metastasis associated 1                                                                             | No Class |
| 1450379_at   | Msn    | moesin                                                                                              | No Class |
| 1421814_at   | Msn    | moesin                                                                                              | No Class |
| 1429109_at   | Msi2   | male-specific lethal 2 homolog (Drosophila)                                                         | No Class |
| 1429108_at   | Msi2   | male-specific lethal 2 homolog (Drosophila)                                                         | No Class |

|              |          |                                                     |          |
|--------------|----------|-----------------------------------------------------|----------|
| 1441185_at   | Msi2     | Musashi homolog 2 (Drosophila)                      | No Class |
| 1421409_at   | Msi1     | Musashi homolog 1(Drosophila)                       | No Class |
| 1416988_at   | Msh2     | mutS homolog 2 (E. coli)                            | No Class |
| 1450234_at   | Ms4a6c   | membrane-spanning 4-domains, subfamily A, member 6C | No Class |
| 1418990_at   | Ms4a4d   | membrane-spanning 4-domains, subfamily A, member 4D | No Class |
| 1420572_at   | Ms4a3    | membrane-spanning 4-domains, subfamily A, member 3  | No Class |
| 1431521_at   | Ms4a18   | membrane-spanning 4-domains, subfamily A, member 18 | No Class |
| 1459665_s_at | Mrvi1    | MRV integration site 1                              | No Class |
| 1422245_a_at | Mrvi1    | MRV integration site 1                              | No Class |
| 1448921_a_at | Mrps9    | mitochondrial ribosomal protein S9                  | No Class |
| 1439210_at   | Mrps9    | mitochondrial ribosomal protein S9                  | No Class |
| 1435843_x_at | Mrps9    | mitochondrial ribosomal protein S9                  | No Class |
| 1447585_s_at | Mrps6    | mitochondrial ribosomal protein S6                  | No Class |
| 1453954_a_at | Mrps5    | mitochondrial ribosomal protein S5                  | No Class |
| 1447628_x_at | Mrps5    | mitochondrial ribosomal protein S5                  | No Class |
| 1452111_at   | Mrps35   | mitochondrial ribosomal protein S35                 | No Class |
| 1433646_at   | Mrps27   | mitochondrial ribosomal protein S27                 | No Class |
| 1433878_at   | Mrps26   | mitochondrial ribosomal protein S26                 | No Class |
| 1449194_at   | Mrps25   | mitochondrial ribosomal protein S25                 | No Class |
| 1459806_x_at | Mrps23   | mitochondrial ribosomal protein S23                 | No Class |
| 1416595_at   | Mrps22   | mitochondrial ribosomal protein S22                 | No Class |
| 1416984_at   | Mrps18a  | mitochondrial ribosomal protein S18A                | No Class |
| 1453728_a_at | Mrps17   | mitochondrial ribosomal protein S17                 | No Class |
| 1448869_a_at | Mrps16   | mitochondrial ribosomal protein S16                 | No Class |
| 1430976_a_at | Mrpl9    | mitochondrial ribosomal protein L9                  | No Class |
| 1448699_at   | Mrpl54   | mitochondrial ribosomal protein L54                 | No Class |
| 1423492_at   | Mrpl45   | mitochondrial ribosomal protein L45                 | No Class |
| 1452144_a_at | Mrpl44   | mitochondrial ribosomal protein L44                 | No Class |
| 1437391_x_at | Mrpl44   | mitochondrial ribosomal protein L44                 | No Class |
| 1418439_at   | Mrpl42   | mitochondrial ribosomal protein L42                 | No Class |
| 1423764_s_at | Mrpl37   | mitochondrial ribosomal protein L37                 | No Class |
| 1416349_at   | Mrpl34   | mitochondrial ribosomal protein L34                 | No Class |
| 1424372_at   | Mrpl32   | mitochondrial ribosomal protein L32                 | No Class |
| 1421914_s_at | Mrpl19   | mitochondrial ribosomal protein L19                 | No Class |
| 1421913_at   | Mrpl19   | mitochondrial ribosomal protein L19                 | No Class |
| 1450866_a_at | Mrpl17   | mitochondrial ribosomal protein L17                 | No Class |
| 1450880_at   | Mrpl16   | mitochondrial ribosomal protein L16                 | No Class |
| 1435232_x_at | Mrpl15   | mitochondrial ribosomal protein L15                 | No Class |
| 1434971_x_at | Mrpl15   | mitochondrial ribosomal protein L15                 | No Class |
| 1434970_a_at | Mrpl15   | mitochondrial ribosomal protein L15                 | No Class |
| 1425189_a_at | Mrpl15   | mitochondrial ribosomal protein L15                 | No Class |
| 1460354_a_at | Mrpl13   | mitochondrial ribosomal protein L13                 | No Class |
| 1435966_x_at | Mrpl13   | mitochondrial ribosomal protein L13                 | No Class |
| 1452048_at   | Mrpl12   | mitochondrial ribosomal protein L12                 | No Class |
| 1437839_x_at | Mrpl11   | mitochondrial ribosomal protein L11                 | No Class |
| 1437131_x_at | Mrpl11   | mitochondrial ribosomal protein L11                 | No Class |
| 1450948_a_at | Mrpl1    | mitochondrial ribosomal protein L1                  | No Class |
| 1426121_at   | Mrgpra3  | MAS-related GPR, member A3                          | No Class |
| 1416496_at   | Mrfap1   | Morf4 family associated protein 1                   | No Class |
| 1449590_a_at | Mras     | muscle and microspikes RAS                          | No Class |
| 1448265_x_at | Mpzl2    | myelin protein zero-like 2                          | No Class |
| 1416237_at   | Mpzl2    | myelin protein zero-like 2                          | No Class |
| 1416236_a_at | Mpzl2    | myelin protein zero-like 2                          | No Class |
| 1450919_at   | Mpp1     | membrane protein, palmitoylated                     | No Class |
| 1415960_at   | Mpo      | myeloperoxidase                                     | No Class |
| 1449659_s_at | Mphosph9 | M-phase phosphoprotein 9                            | No Class |
| 1438063_at   | Mphosph9 | M-phase phosphoprotein 9                            | No Class |

|              |           |                                                                                                 |          |
|--------------|-----------|-------------------------------------------------------------------------------------------------|----------|
| 1419909_at   | Mphosph9  | M-phase phosphoprotein 9                                                                        | No Class |
| 1429080_at   | Mphosph10 | M-phase phosphoprotein 10 (U3 small nucleolar ribonucleoprotein)                                | No Class |
| 1418664_at   | Mpdz      | multiple PDZ domain protein                                                                     | No Class |
| 1418663_at   | Mpdz      | multiple PDZ domain protein                                                                     | No Class |
| 1447927_at   | Mpa2l     | macrophage activation 2 like                                                                    | No Class |
| 1438676_at   | Mpa2l     | macrophage activation 2 like                                                                    | No Class |
| 1416380_at   | Mov10     | Moloney leukemia virus 10                                                                       | No Class |
| 1453920_a_at | Mospd2    | motile sperm domain containing 2                                                                | No Class |
| 1456743_x_at | Morf4l2   | mortality factor 4 like 2                                                                       | No Class |
| 1439432_x_at | Morf4l2   | mortality factor 4 like 2                                                                       | No Class |
| 1439413_x_at | Morf4l2   | mortality factor 4 like 2                                                                       | No Class |
| 1415778_at   | Morf4l2   | mortality factor 4 like 2                                                                       | No Class |
| 1456142_x_at | Morf4l1   | mortality factor 4 like 1                                                                       | No Class |
| 1455742_x_at | Morf4l1   | mortality factor 4 like 1                                                                       | No Class |
| 1455077_a_at | Morf4l1   | mortality factor 4 like 1                                                                       | No Class |
| 1438597_x_at | Morf4l1   | mortality factor 4 like 1                                                                       | No Class |
| 1437802_x_at | Morf4l1   | mortality factor 4 like 1                                                                       | No Class |
| 1439222_at   | Morc2b    | microrchidia 2B                                                                                 | No Class |
| 1436263_at   | Mobp      | myelin-associated oligodendrocytic basic protein                                                | No Class |
| 1421010_at   | Mobp      | myelin-associated oligodendrocytic basic protein                                                | No Class |
| 1459919_a_at | Mobkl2c   | MOB1, Mps One Binder kinase activator-like 2C (yeast)                                           | No Class |
| 1424484_at   | Mobkl1b   | MOB1, Mps One Binder kinase activator-like 1B (yeast)                                           | No Class |
| 1424483_at   | Mobkl1b   | MOB1, Mps One Binder kinase activator-like 1B (yeast)                                           | No Class |
| 1431815_a_at | Mms19     | MMS19 (MET18 S. cerevisiae)                                                                     | No Class |
| 1449478_at   | Mmp7      | matrix metalloproteinase 7                                                                      | No Class |
| 1421706_at   | Mmp20     | matrix metalloproteinase 20 (enamelysin)                                                        | No Class |
| 1421977_at   | Mmp19     | matrix metalloproteinase 19                                                                     | No Class |
| 1421976_at   | Mmp19     | matrix metalloproteinase 19                                                                     | No Class |
| 1437462_x_at | Mmp15     | matrix metalloproteinase 15                                                                     | No Class |
| 1448383_at   | Mmp14     | matrix metalloproteinase 14 (membrane-inserted)                                                 | No Class |
| 1440920_at   | Mmp14     | matrix metalloproteinase 14 (membrane-inserted)                                                 | No Class |
| 1416572_at   | Mmp14     | matrix metalloproteinase 14 (membrane-inserted)                                                 | No Class |
| 1436706_at   | Mmgt1     | membrane magnesium transporter 1                                                                | No Class |
| 1417573_at   | Mmadhc    | methylmalonic aciduria (cobalamin deficiency) cbID type, with homocystinuria                    | No Class |
| 1452467_at   | Mmab      | methylmalonic aciduria (cobalamin deficiency) type B homolog (human)                            | No Class |
| 1425930_a_at | Mlx       | MAX-like protein X                                                                              | No Class |
| 1441535_at   | Mllt3     | Myeloid/lymphoid or mixed-lineage leukemia (trithorax homolog, Drosophila); translocated to, 3  | No Class |
| 1416313_at   | Mllt11    | myeloid/lymphoid or mixed-lineage leukemia (trithorax homolog, Drosophila); translocated to, 11 | No Class |
| 1421060_at   | Mllt1     | myeloid/lymphoid or mixed-lineage leukemia (trithorax homolog, Drosophila); translocated to, 1  | No Class |
| 1439108_at   | Mll5      | myeloid/lymphoid or mixed-lineage leukemia 5                                                    | No Class |
| 1439107_a_at | Mll5      | myeloid/lymphoid or mixed-lineage leukemia 5                                                    | No Class |
| 1427236_a_at | Mll5      | myeloid/lymphoid or mixed-lineage leukemia 5                                                    | No Class |
| 1434179_at   | Mll3      | myeloid/lymphoid or mixed-lineage leukemia 3                                                    | No Class |
| 1434178_at   | Mll3      | myeloid/lymphoid or mixed-lineage leukemia 3                                                    | No Class |
| 1427150_at   | Mll3      | myeloid/lymphoid or mixed-lineage leukemia 3                                                    | No Class |
| 1427283_at   | Mll1      | myeloid/lymphoid or mixed-lineage leukemia 1                                                    | No Class |
| 1437492_at   | Mkx       | mohawk homeobox                                                                                 | No Class |
| 1451425_a_at | Mkrrn1    | makorin, ring finger protein, 1                                                                 | No Class |
| 1434853_x_at | Mkrrn1    | makorin, ring finger protein, 1                                                                 | No Class |
| 1418434_at   | Mkrrn1    | makorin, ring finger protein, 1                                                                 | No Class |
| 1449029_at   | Mknk2     | MAP kinase-interacting serine/threonine kinase 2                                                | No Class |
| 1417631_at   | Mknk1     | MAP kinase-interacting serine/threonine kinase 1                                                | No Class |
| 1417630_at   | Mknk1     | MAP kinase-interacting serine/threonine kinase 1                                                | No Class |
| 1424001_at   | Mki67ip   | Mki67 (FHA domain) interacting nucleolar phosphoprotein                                         | No Class |
| 1426817_at   | Mki67     | antigen identified by monoclonal antibody Ki 67                                                 | No Class |
| 1421505_at   | Mixl1     | Mix1 homeobox-like 1 (Xenopus laevis)                                                           | No Class |
| 1455214_at   | Mitf      | microphthalmia-associated transcription factor                                                  | No Class |

|              |          |                                                                        |          |
|--------------|----------|------------------------------------------------------------------------|----------|
| 1422025_at   | Mitf     | microphthalmia-associated transcription factor                         | No Class |
| 1426133_a_at | Mitd1    | MIT, microtubule interacting and transport, domain containing 1        | No Class |
| 1424717_at   | Mis12    | MIS12 homolog (yeast)                                                  | No Class |
| 1457030_at   | Mirg     | miRNA containing gene                                                  | No Class |
| 1430655_at   | Mir205   | microRNA 205                                                           | No Class |
| 1424803_at   | Mios     | missing oocyte, meiosis regulator, homolog (Drosophila)                | No Class |
| 1423595_at   | Mina     | myc induced nuclear antigen                                            | No Class |
| 1429032_at   | Micalcl  | MICAL C-terminal like                                                  | No Class |
| 1424862_s_at | Mib2     | mindbomb homolog 2 (Drosophila)                                        | No Class |
| 1422902_s_at | Mgea5    | meningioma expressed antigen 5 (hyaluronidase)                         | No Class |
| 1422901_at   | Mgea5    | meningioma expressed antigen 5 (hyaluronidase)                         | No Class |
| 1425424_at   | MGC7817  | hypothetical protein LOC620031                                         | No Class |
| 1438497_at   | Mfsd8    | major facilitator superfamily domain containing 8                      | No Class |
| 1419124_at   | Mfsd6    | major facilitator superfamily domain containing 6                      | No Class |
| 1428223_at   | Mfsd2a   | major facilitator superfamily domain containing 2A                     | No Class |
| 1451247_at   | Mfsd1    | major facilitator superfamily domain containing 1                      | No Class |
| 1437055_x_at | Mfsd1    | major facilitator superfamily domain containing 1                      | No Class |
| 1453607_at   | Mfap3l   | microfibrillar-associated protein 3-like                               | No Class |
| 1441481_at   | Mfap3l   | microfibrillar-associated protein 3-like                               | No Class |
| 1451464_at   | Mfap3    | microfibrillar-associated protein 3                                    | No Class |
| 1437627_at   | Mex3d    | mex3 homolog D (C. elegans)                                            | No Class |
| 1437152_at   | Mex3b    | mex3 homolog B (C. elegans)                                            | No Class |
| 1455529_at   | Mex3a    | mex3 homolog A (C. elegans)                                            | No Class |
| 1451141_at   | Mettl8   | methyltransferase like 8                                               | No Class |
| 1421185_at   | Mettl7a1 | methyltransferase like 7A1                                             | No Class |
| 1432384_a_at | Mettl6   | methyltransferase like 6                                               | No Class |
| 1460519_a_at | Mettl5   | methyltransferase like 5                                               | No Class |
| 1456118_at   | Mettl2   | methyltransferase like 2                                               | No Class |
| 1460050_x_at | Mettl13  | Methyltransferase like 13                                              | No Class |
| 1423761_at   | Mettl13  | methyltransferase like 13                                              | No Class |
| 1456340_at   | Mettl11a | Methyltransferase like 11A                                             | No Class |
| 1447683_x_at | Mettl1   | methyltransferase like 1                                               | No Class |
| 1439155_at   | Mettl1   | methyltransferase like 1                                               | No Class |
| 1419122_at   | Mettl1   | methyltransferase like 1                                               | No Class |
| 1424356_a_at | Metrn1   | meteorin, glial cell differentiation regulator-like                    | No Class |
| 1436531_at   | Metap2   | methionine aminopeptidase 2                                            | No Class |
| 1434447_at   | Met      | met proto-oncogene                                                     | No Class |
| 1422990_at   | Met      | met proto-oncogene                                                     | No Class |
| 1450719_at   | Mep1a    | meprin 1 alpha                                                         | No Class |
| 1424234_s_at | Meox2    | mesenchyme homeobox 2                                                  | No Class |
| 1424233_at   | Meox2    | mesenchyme homeobox 2                                                  | No Class |
| 1416348_at   | Men1     | multiple endocrine neoplasia 1                                         | No Class |
| 1416347_at   | Men1     | multiple endocrine neoplasia 1                                         | No Class |
| 1457632_s_at | Meis2    | Meis homeobox 2                                                        | No Class |
| 1447861_x_at | Meis2    | Meis homeobox 2                                                        | No Class |
| 1417129_a_at | Meis2    | Meis homeobox 2                                                        | No Class |
| 1429841_at   | Megf10   | multiple EGF-like-domains 10                                           | No Class |
| 1424852_at   | Mef2c    | myocyte enhancer factor 2C                                             | No Class |
| 1452347_at   | Mef2a    | myocyte enhancer factor 2A                                             | No Class |
| 1427186_a_at | Mef2a    | myocyte enhancer factor 2A                                             | No Class |
| 1421252_a_at | Mef2a    | myocyte enhancer factor 2A                                             | No Class |
| 1449448_at   | Med9     | mediator of RNA polymerase II transcription, subunit 9 homolog (yeast) | No Class |
| 1432462_a_at | Med27    | mediator complex subunit 27                                            | No Class |
| 1425806_a_at | Med21    | mediator complex subunit 21                                            | No Class |
| 1416826_a_at | Med20    | mediator complex subunit 20                                            | No Class |
| 1453161_at   | Med13    | mediator complex subunit 13                                            | No Class |
| 1444068_at   | Med13    | mediator complex subunit 13                                            | No Class |

|              |          |                                                                 |          |
|--------------|----------|-----------------------------------------------------------------|----------|
| 1450402_at   | Med1     | mediator complex subunit 1                                      | No Class |
| 1448708_at   | Med1     | mediator complex subunit 1                                      | No Class |
| 1447450_at   | Med1     | mediator complex subunit 1                                      | No Class |
| 1439408_a_at | Med1     | mediator complex subunit 1                                      | No Class |
| 1438930_s_at | Mecp2    | methyl CpG binding protein 2                                    | No Class |
| 1438538_at   | Mecp2    | methyl CpG binding protein 2                                    | No Class |
| 1437943_s_at | Mea1     | male enhanced antigen 1                                         | No Class |
| 1416810_at   | Mea1     | male enhanced antigen 1                                         | No Class |
| 1460542_s_at | Mdm4     | transformed mouse 3T3 cell double minute 4                      | No Class |
| 1451053_a_at | Mdm1     | transformed mouse 3T3 cell double minute 1                      | No Class |
| 1445709_at   | Mdm1     | transformed mouse 3T3 cell double minute 1                      | No Class |
| 1416006_at   | Mdk      | midkine                                                         | No Class |
| 1433984_a_at | Mdh2     | malate dehydrogenase 2, NAD (mitochondrial)                     | No Class |
| 1454925_x_at | Mdh1     | malate dehydrogenase 1, NAD (soluble)                           | No Class |
| 1436834_x_at | Mdh1     | malate dehydrogenase 1, NAD (soluble)                           | No Class |
| 1429557_at   | Mcm8     | minichromosome maintenance deficient 8 ( <i>S. cerevisiae</i> ) | No Class |
| 1456381_x_at | Mcl1     | myeloid cell leukemia sequence 1                                | No Class |
| 1456243_x_at | Mcl1     | myeloid cell leukemia sequence 1                                | No Class |
| 1437527_x_at | Mcl1     | myeloid cell leukemia sequence 1                                | No Class |
| 1438081_at   | Mcc      | mutated in colorectal cancers                                   | No Class |
| 1441100_at   | Mbtd1    | mbt domain containing 1                                         | No Class |
| 1456228_x_at | Mbp      | myelin basic protein                                            | No Class |
| 1454651_x_at | Mbp      | myelin basic protein                                            | No Class |
| 1436201_x_at | Mbp      | myelin basic protein                                            | No Class |
| 1433532_a_at | Mbp      | myelin basic protein                                            | No Class |
| 1419646_a_at | Mbp      | myelin basic protein                                            | No Class |
| 1425029_a_at | Mboat2   | membrane bound O-acyltransferase domain containing 2            | No Class |
| 1455827_at   | Mbnl2    | muscleblind-like 2                                              | No Class |
| 1436858_at   | Mbnl2    | muscleblind-like 2                                              | No Class |
| 1433754_at   | Mbnl2    | muscleblind-like 2                                              | No Class |
| 1440315_at   | Mbnl1    | muscleblind-like 1 ( <i>Drosophila</i> )                        | No Class |
| 1437704_at   | Mblac2   | metallo-beta-lactamase domain containing 2                      | No Class |
| 1437261_at   | Mblac2   | metallo-beta-lactamase domain containing 2                      | No Class |
| 1422420_at   | Mb       | myoglobin                                                       | No Class |
| 1450874_at   | Matr3    | matrin 3                                                        | No Class |
| 1441272_at   | Matr3    | Matrin 3                                                        | No Class |
| 1431235_at   | Matr3    | matrin 3                                                        | No Class |
| 1456702_x_at | Mat2a    | methionine adenosyltransferase II, alpha                        | No Class |
| 1438976_x_at | Mat2a    | methionine adenosyltransferase II, alpha                        | No Class |
| 1438630_x_at | Mat2a    | methionine adenosyltransferase II, alpha                        | No Class |
| 1438386_x_at | Mat2a    | methionine adenosyltransferase II, alpha                        | No Class |
| 1423525_at   | Mastl    | microtubule associated serine/threonine kinase-like             | No Class |
| 1423524_at   | Mastl    | microtubule associated serine/threonine kinase-like             | No Class |
| 1435666_at   | Mast3    | microtubule associated serine/threonine kinase 3                | No Class |
| 1438603_x_at | Masp1    | mannan-binding lectin serine peptidase 1                        | No Class |
| 1438602_s_at | Masp1    | mannan-binding lectin serine peptidase 1                        | No Class |
| 1425985_s_at | Masp1    | mannan-binding lectin serine peptidase 1                        | No Class |
| 1444809_at   | Marveld3 | MARVEL (membrane-associating) domain containing 3               | No Class |
| 1425511_at   | Mark1    | MAP/microtubule affinity-regulating kinase 1                    | No Class |
| 1456700_x_at | Marcks   | myristoylated alanine rich protein kinase C substrate           | No Class |
| 1456028_x_at | Marcks   | myristoylated alanine rich protein kinase C substrate           | No Class |
| 1415973_at   | Marcks   | myristoylated alanine rich protein kinase C substrate           | No Class |
| 1415972_at   | Marcks   | myristoylated alanine rich protein kinase C substrate           | No Class |
| 1415971_at   | Marcks   | myristoylated alanine rich protein kinase C substrate           | No Class |
| 1438352_at   | Mapre2   | Microtubule-associated protein, RP/EB family, member 2          | No Class |
| 1422765_at   | Mapre1   | microtubule-associated protein, RP/EB family, member 1          | No Class |
| 1450973_s_at | Mapkbp1  | mitogen-activated protein kinase binding protein 1              | No Class |

|              |         |                                                                          |          |
|--------------|---------|--------------------------------------------------------------------------|----------|
| 1423403_at   | Mapkbp1 | mitogen-activated protein kinase binding protein 1                       | No Class |
| 1421878_at   | Mapk9   | mitogen-activated protein kinase 9                                       | No Class |
| 1419169_at   | Mapk6   | mitogen-activated protein kinase 6                                       | No Class |
| 1419168_at   | Mapk6   | mitogen-activated protein kinase 6                                       | No Class |
| 1448342_at   | Mapk10  | mitogen-activated protein kinase 10                                      | No Class |
| 1437195_x_at | Mapk10  | mitogen-activated protein kinase 10                                      | No Class |
| 1426585_s_at | Mapk1   | mitogen-activated protein kinase 1                                       | No Class |
| 1427376_a_at | Map4k5  | mitogen-activated protein kinase kinase kinase 5                         | No Class |
| 1427084_a_at | Map4k5  | mitogen-activated protein kinase kinase kinase 5                         | No Class |
| 1427083_a_at | Map4k5  | mitogen-activated protein kinase kinase kinase 5                         | No Class |
| 1419208_at   | Map3k8  | mitogen-activated protein kinase kinase kinase 8                         | No Class |
| 1425795_a_at | Map3k7  | mitogen-activated protein kinase kinase kinase 7                         | No Class |
| 1450253_a_at | Map3k4  | mitogen-activated protein kinase kinase kinase 4                         | No Class |
| 1451736_a_at | Map2k7  | mitogen-activated protein kinase kinase 7                                | No Class |
| 1434354_at   | Maob    | monoamine oxidase B                                                      | No Class |
| 1442676_at   | Maoa    | monoamine oxidase A                                                      | No Class |
| 1428112_at   | Manf    | mesencephalic astrocyte-derived neurotrophic factor                      | No Class |
| 1416584_at   | Man2b2  | mannosidase 2, alpha B2                                                  | No Class |
| 1436781_at   | Man2b1  | mannosidase 2, alpha B1                                                  | No Class |
| 1456429_at   | Malt1   | mucosa associated lymphoid tissue lymphoma translocation gene 1          | No Class |
| 1445068_at   | Malt1   | mucosa associated lymphoid tissue lymphoma translocation gene 1          | No Class |
| 1435693_at   | Mall    | mal, T-cell differentiation protein-like                                 | No Class |
| 1427042_at   | Mal2    | mal, T-cell differentiation protein 2                                    | No Class |
| 1426426_at   | Mak16   | MAK16 homolog (S. cerevisiae)                                            | No Class |
| 1422724_at   | Mak     | male germ cell-associated kinase                                         | No Class |
| 1422498_at   | Mageh1  | melanoma antigen, family H, 1                                            | No Class |
| 1422431_at   | Magee1  | melanoma antigen, family E, 1                                            | No Class |
| 1450062_a_at | Maged1  | melanoma antigen, family D, 1                                            | No Class |
| 1418936_at   | Maff    | v-maf musculoaponeurotic fibrosarcoma oncogene family, protein F (avian) | No Class |
| 1444073_at   | Maf     | avian musculoaponeurotic fibrosarcoma (v-maf) AS42 oncogene homolog      | No Class |
| 1425253_a_at | Madcam1 | mucosal vascular addressin cell adhesion molecule 1                      | No Class |
| 1425252_a_at | Mad111  | mitotic arrest deficient 1-like 1                                        | No Class |
| 1428847_a_at | Macf1   | microtubule-actin crosslinking factor 1                                  | No Class |
| 1416386_a_at | M6pr    | mannose-6-phosphate receptor, cation dependent                           | No Class |
| 1416385_a_at | M6pr    | mannose-6-phosphate receptor, cation dependent                           | No Class |
| 1460200_s_at | Lztf1   | leucine zipper transcription factor-like 1                               | No Class |
| 1428974_s_at | Lztf1   | leucine zipper transcription factor-like 1                               | No Class |
| 1417170_at   | Lztf1   | leucine zipper transcription factor-like 1                               | No Class |
| 1447684_at   | Lzic    | Leucine zipper and CTNNBIP1 domain containing                            | No Class |
| 1423547_at   | Lyz2    | lysozyme 2                                                               | No Class |
| 1450822_at   | Lyz1    | lysozyme 1                                                               | No Class |
| 1439426_x_at | Lyz1    | lysozyme 1                                                               | No Class |
| 1436996_x_at | Lyz1    | lysozyme 1                                                               | No Class |
| 1460335_at   | Lysmd3  | LysM, putative peptidoglycan-binding, domain containing 3                | No Class |
| 1434174_at   | Lysmd3  | LysM, putative peptidoglycan-binding, domain containing 3                | No Class |
| 1441952_x_at | Lynx1   | Ly6/neurotoxin 1                                                         | No Class |
| 1417283_at   | Lynx1   | Ly6/neurotoxin 1                                                         | No Class |
| 1449156_at   | Ly9     | lymphocyte antigen 9                                                     | No Class |
| 1422903_at   | Ly86    | lymphocyte antigen 86                                                    | No Class |
| 1450774_at   | Ly6g6d  | lymphocyte antigen 6 complex, locus G6D                                  | No Class |
| 1416469_at   | Luzp1   | leucine zipper protein 1                                                 | No Class |
| 1458423_at   | Luc712  | LUC7-like 2 (S. cerevisiae)                                              | No Class |
| 1445717_at   | Luc712  | LUC7-like 2 (S. cerevisiae)                                              | No Class |
| 1456189_x_at | Ltbp3   | latent transforming growth factor beta binding protein 3                 | No Class |
| 1437833_at   | Ltbp3   | latent transforming growth factor beta binding protein 3                 | No Class |
| 1453528_at   | Lta4h   | leukotriene A4 hydrolase                                                 | No Class |
| 1417756_a_at | Lsp1    | lymphocyte specific 1                                                    | No Class |

|              |                                 |                                                                                                           |          |
|--------------|---------------------------------|-----------------------------------------------------------------------------------------------------------|----------|
| 1428438_s_at | Lsm14a                          | LSM14 homolog A (SCD6, <i>S. cerevisiae</i> )                                                             | No Class |
| 1428437_at   | Lsm14a                          | LSM14 homolog A (SCD6, <i>S. cerevisiae</i> )                                                             | No Class |
| 1453755_at   | Lsm11                           | U7 snRNP-specific Sm-like protein LSM11                                                                   | No Class |
| 1441452_at   | Lsm1                            | LSM1 homolog, U6 small nuclear RNA associated ( <i>S. cerevisiae</i> )                                    | No Class |
| 1437771_at   | Lrrn4cl                         | LRRN4 C-terminal like                                                                                     | No Class |
| 1434539_at   | Lrrn3                           | leucine rich repeat protein 3, neuronal                                                                   | No Class |
| 1451986_s_at | Lrrk1                           | leucine-rich repeat kinase 1                                                                              | No Class |
| 1451985_at   | Lrrk1                           | leucine-rich repeat kinase 1                                                                              | No Class |
| 1437330_at   | Lrrk1                           | leucine-rich repeat kinase 1                                                                              | No Class |
| 1436510_a_at | Lrrfip2                         | leucine rich repeat (in FLII) interacting protein 2                                                       | No Class |
| 1436378_at   | Lrrfip2                         | leucine rich repeat (in FLII) interacting protein 2                                                       | No Class |
| 1456008_at   | Lrrc8e                          | leucine rich repeat containing 8 family, member E                                                         | No Class |
| 1438445_at   | Lrrc8e                          | leucine rich repeat containing 8 family, member E                                                         | No Class |
| 1430283_s_at | Lrrc67                          | leucine rich repeat containing 67                                                                         | No Class |
| 1416235_at   | Lrrc59                          | leucine rich repeat containing 59                                                                         | No Class |
| 1421974_at   | Lrrc50                          | leucine rich repeat containing 50                                                                         | No Class |
| 1437201_at   | Lrrc4c                          | leucine rich repeat containing 4C                                                                         | No Class |
| 1429366_at   | Lrrc34                          | leucine rich repeat containing 34                                                                         | No Class |
| 1447173_at   | Lrrc31                          | leucine rich repeat containing 31                                                                         | No Class |
| 1453112_a_at | Lrrc18                          | leucine rich repeat containing 18                                                                         | No Class |
| 1426288_at   | Lrp4                            | low density lipoprotein receptor-related protein 4                                                        | No Class |
| 1433864_at   | Lrp12                           | low density lipoprotein-related protein 12                                                                | No Class |
| 1442849_at   | Lrp1                            | low density lipoprotein receptor-related protein 1                                                        | No Class |
| 1430555_s_at | Lrig3                           | leucine-rich repeats and immunoglobulin-like domains 3                                                    | No Class |
| 1430554_at   | Lrig3                           | leucine-rich repeats and immunoglobulin-like domains 3                                                    | No Class |
| 1424879_at   | Lrch4 /// Lrch4-sap25 /// Sap25 | leucine-rich repeats and calponin homology (CH) domain containing 4 /// Lrch4-Sap25 gene /// sin3 associa | No Class |
| 1436877_at   | Lrch2                           | leucine-rich repeats and calponin homology (CH) domain containing 2                                       | No Class |
| 1424965_at   | Lpxn                            | leupaxin                                                                                                  | No Class |
| 1455314_at   | Lpp                             | LIM domain containing preferred translocation partner in lipoma                                           | No Class |
| 1454899_at   | Lpp                             | LIM domain containing preferred translocation partner in lipoma                                           | No Class |
| 1437235_x_at | Lpp                             | LIM domain containing preferred translocation partner in lipoma                                           | No Class |
| 1436714_at   | Lpp                             | LIM domain containing preferred translocation partner in lipoma                                           | No Class |
| 1446316_at   | Lpin2                           | lipin 2                                                                                                   | No Class |
| 1434945_at   | Lpcat2                          | lysophosphatidylcholine acyltransferase 2                                                                 | No Class |
| 1451359_at   | Lpcat1                          | lysophosphatidylcholine acyltransferase 1                                                                 | No Class |
| 1424460_s_at | Lpcat1                          | lysophosphatidylcholine acyltransferase 1                                                                 | No Class |
| 1424459_at   | Lpcat1                          | lysophosphatidylcholine acyltransferase 1                                                                 | No Class |
| 1434186_at   | Lpar4                           | lysophosphatidic acid receptor 4                                                                          | No Class |
| 1448606_at   | Lpar1                           | lysophosphatidic acid receptor 1                                                                          | No Class |
| 1426110_a_at | Lpar1                           | lysophosphatidic acid receptor 1                                                                          | No Class |
| 1417143_at   | Lpar1                           | lysophosphatidic acid receptor 1                                                                          | No Class |
| 1452436_at   | Loxl2                           | lysyl oxidase-like 2                                                                                      | No Class |
| 1431004_at   | Loxl2                           | lysyl oxidase-like 2                                                                                      | No Class |
| 1442258_at   | Lonp2                           | lon peptidase 2, peroxisomal                                                                              | No Class |
| 1430404_at   | LOC75771                        | hypothetical LOC75771                                                                                     | No Class |
| 1431940_at   | LOC74457                        | hypothetical protein LOC74457                                                                             | No Class |
| 1428670_at   | LOC72520                        | hypothetical gene LOC72520                                                                                | No Class |
| 1429475_at   | LOC677224 /// Ubash3b           | similar to RIKEN cDNA 2810457I06 /// ubiquitin associated and SH3 domain containing, B                    | No Class |
| 1450500_at   | LOC677213 /// Uhmk1             | similar to U2AF homology motif (UHM) kinase 1 /// U2AF homology motif (UHM) kinase 1                      | No Class |
| 1422136_at   | LOC677213 /// Uhmk1             | similar to U2AF homology motif (UHM) kinase 1 /// U2AF homology motif (UHM) kinase 1                      | No Class |
| 1451318_a_at | LOC676654 /// Lyn               | similar to Yamaguchi sarcoma viral (v-yes-1) oncogene homolog /// Yamaguchi sarcoma viral (v-yes-1) onco  | No Class |
| 1433680_x_at | LOC676549 /// Siva1             | similar to CD27-binding (Siva) protein isoform 2 /// SIVA1, apoptosis-inducing factor                     | No Class |
| 1456516_x_at | LOC640502 /// Uap1              | similar to UDP-N-acetylhexosamine pyrophosphorylase /// UDP-N-acetylglucosamine pyrophosphorylase 1       | No Class |
| 1437490_x_at | LOC640502 /// Uap1              | similar to UDP-N-acetylhexosamine pyrophosphorylase /// UDP-N-acetylglucosamine pyrophosphorylase 1       | No Class |
| 1416743_at   | LOC640502 /// Uap1              | similar to UDP-N-acetylhexosamine pyrophosphorylase /// UDP-N-acetylglucosamine pyrophosphorylase 1       | No Class |
| 1423522_at   | LOC639633 /// Npm3 /// Npm3-ps1 | similar to Nucleoplasmin-3 /// nucleoplasmin 3 /// nucleoplasmin 3, pseudogene 1                          | No Class |
| 1429506_at   | LOC634379 /// Nkd1              | similar to naked cuticle 1 homolog /// naked cuticle 1 homolog ( <i>Drosophila</i> )                      | No Class |

|              |                                      |                                                                                                                      |          |
|--------------|--------------------------------------|----------------------------------------------------------------------------------------------------------------------|----------|
| 1455001_x_at | LOC633178 /// LOC638236 /// Rpl13a   | similar to 60S ribosomal protein L13a /// similar to 60S ribosomal protein L13a (Transplantation antigen P1)         | No Class |
| 1433928_a_at | LOC633178 /// LOC638236 /// Rpl13a   | similar to 60S ribosomal protein L13a /// similar to 60S ribosomal protein L13a (Transplantation antigen P1)         | No Class |
| 1435608_at   | LOC631806 /// Znf3                   | similar to Goliath homolog precursor (Ring finger protein 130) (R-goliath) /// zinc and ring finger 3                | No Class |
| 1456086_x_at | LOC631302 /// Pqbp1                  | similar to polyglutamine binding protein 1 /// polyglutamine binding protein 1                                       | No Class |
| 1435840_x_at | LOC625360                            | 2-cell-stage, variable group, member 3-like                                                                          | No Class |
| 1442320_at   | LOC553096                            | hypothetical LOC553096                                                                                               | No Class |
| 1440982_at   | LOC552909                            | hypothetical LOC552909                                                                                               | No Class |
| 1438127_at   | LOC552906                            | hypothetical LOC552906                                                                                               | No Class |
| 1456659_at   | LOC552902                            | hypothetical LOC552902                                                                                               | No Class |
| 1425421_at   | LOC100134980                         | hypothetical LOC100134980                                                                                            | No Class |
| 1431620_at   | LOC100125594                         | hypothetical protein LOC100125594                                                                                    | No Class |
| 1420465_s_at | LOC100048885 /// LOC100189605 /// Mu | major urinary protein LOC100048885 /// major urinary protein 17 /// major urinary protein 1 /// major urir           | No Class |
| 1416059_at   | LOC100048726 /// Sec23b              | similar to SEC23B /// SEC23B (S. cerevisiae)                                                                         | No Class |
| 1453722_s_at | LOC100048559 /// Sfrs1               | similar to splicing factor, arginine/serine-rich 1 (splicing factor 2, alternate splicing factor) /// splicing facto | No Class |
| 1452430_s_at | LOC100048559 /// Sfrs1               | similar to splicing factor, arginine/serine-rich 1 (splicing factor 2, alternate splicing factor) /// splicing facto | No Class |
| 1436699_x_at | LOC100048449 /// Rpl18               | similar to ribosomal protein L18 /// ribosomal protein L18                                                           | No Class |
| 1435532_at   | LOC100048362 /// Rimklb              | similar to mKIAA1238 protein /// ribosomal modification protein rimK-like family member B                            | No Class |
| 1419790_at   | LOC100048336                         | hypothetical protein LOC100048336                                                                                    | No Class |
| 1448204_at   | LOC100048168 /// Sav1                | similar to WW45 protein /// salvador homolog 1 (Drosophila)                                                          | No Class |
| 1416075_at   | LOC100048168 /// Sav1                | similar to WW45 protein /// salvador homolog 1 (Drosophila)                                                          | No Class |
| 1420494_x_at | LOC100048105 /// Ubc                 | similar to Ubc protein /// ubiquitin C                                                                               | No Class |
| 1446939_at   | LOC100048060 /// Trim12              | similar to tripartite motif protein TRIM12 /// tripartite motif-containing 12                                        | No Class |
| 1420648_at   | LOC100048060 /// Trim12              | similar to tripartite motif protein TRIM12 /// tripartite motif-containing 12                                        | No Class |
| 1441902_x_at | LOC100048058 /// Slc29a4             | similar to Solute carrier family 29 (nucleoside transporters), member 4 /// solute carrier family 29 (nucleos        | No Class |
| 1457259_at   | LOC100047864                         | similar to sorting nexin 6                                                                                           | No Class |
| 1421098_at   | LOC100047840 /// Stap1               | similar to stem cell adaptor protein STAP-1 /// signal transducing adaptor family member 1                           | No Class |
| 1421133_at   | LOC100047693 /// Pvr13               | similar to cell adhesion molecule nectin-3 beta /// poliovirus receptor-related 3                                    | No Class |
| 1429714_at   | LOC100047675 /// Sumf2               | similar to sulfatase modifying factor 2 /// sulfatase modifying factor 2                                             | No Class |
| 1418326_at   | LOC100047619 /// Slc7a5              | similar to solute carrier family 7 (cationic amino acid transporter, y+ system), member 5 /// solute carrier f       | No Class |
| 1424870_at   | LOC100047530 /// Osbpl10             | similar to oxysterol-binding protein-like protein OSBPL10 /// oxysterol binding protein-like 1C                      | No Class |
| 1456146_at   | LOC100047530                         | similar to oxysterol-binding protein-like protein OSBPL10                                                            | No Class |
| 1426849_at   | LOC100047481 /// Sec24b              | similar to SEC24 related gene family, member B (S. cerevisiae) /// Sec24 related gene family, member B (S.           | No Class |
| 1456984_at   | LOC100047360 /// Scml2               | similar to sex comb on midleg-like 2 (Drosophila) /// sex comb on midleg-like 2 (Drosophila)                         | No Class |
| 1452226_at   | LOC100047340 /// Rcc2                | hypothetical protein LOC100047340 /// regulator of chromosome condensation 2                                         | No Class |
| 1418744_s_at | LOC100047138 /// Tesc                | similar to Tescalcin /// tescalcin                                                                                   | No Class |
| 1418743_a_at | LOC100047138 /// Tesc                | similar to Tescalcin /// tescalcin                                                                                   | No Class |
| 1437871_at   | LOC100046963 /// Pgm5                | similar to phosphoglucomutase 5 /// phosphoglucomutase 5                                                             | No Class |
| 1447016_at   | LOC100046817 /// Tbc1d1              | hypothetical protein LOC100046817 /// TBC1 domain family, member 1                                                   | No Class |
| 1417539_at   | LOC100046775 /// Slc35a1             | similar to CMP-sialic acid transporter /// solute carrier family 35 (CMP-sialic acid transporter), member 1          | No Class |
| 1437832_x_at | LOC100046672 /// Wars                | similar to Wars protein /// tryptophanyl-tRNA synthetase                                                             | No Class |
| 1424110_a_at | LOC100046344 /// Nme1                | similar to Nucleoside diphosphate kinase A (NDK A) (NDP kinase A) (Tumor metastatic process-associated p             | No Class |
| 1448796_s_at | LOC100046166 /// Tbrg4               | similar to Transforming growth factor beta regulated gene 4 /// transforming growth factor beta regulated            | No Class |
| 1448795_a_at | LOC100046166 /// Tbrg4               | similar to Transforming growth factor beta regulated gene 4 /// transforming growth factor beta regulated            | No Class |
| 1417658_at   | LOC100046166 /// Tbrg4               | similar to Transforming growth factor beta regulated gene 4 /// transforming growth factor beta regulated            | No Class |
| 1456219_at   | LOC100045988 /// Zic5                | similar to OPR /// zinc finger protein of the cerebellum 5                                                           | No Class |
| 1459981_s_at | LOC100045795 /// Rsbn1               | similar to mKIAA3002 protein /// rosin, round spermatid basic protein 1                                              | No Class |
| 1415789_a_at | LOC100045709 /// Ubpcp1              | similar to ubiquitin-like domain containing CTD phosphatase 1 /// ubiquitin-like domain containing CTD phc           | No Class |
| 1453299_a_at | LOC100045567 /// Pnp /// Pnp2        | similar to purine nucleoside phosphorylase /// purine-nucleoside phosphorylase /// purine-nucleoside pho             | No Class |
| 1416530_a_at | LOC100045567 /// Pnp                 | similar to purine nucleoside phosphorylase /// purine-nucleoside phosphorylase                                       | No Class |
| 1421940_at   | LOC100045442 /// Stag1               | similar to Stromal antigen 1 /// stromal antigen 1                                                                   | No Class |
| 1421939_a_at | LOC100045442 /// Stag1               | similar to Stromal antigen 1 /// stromal antigen 1                                                                   | No Class |
| 1448786_at   | LOC100045163 /// Plbd1               | similar to RIKEN cDNA 1100001H23 gene /// phospholipase B domain containing 1                                        | No Class |
| 1456462_x_at | LOC100044953 /// Ppp1cb              | similar to protein phosphatase 1 /// protein phosphatase 1, catalytic subunit, beta isoform                          | No Class |
| 1433540_x_at | LOC100044953 /// Ppp1cb              | similar to protein phosphatase 1 /// protein phosphatase 1, catalytic subunit, beta isoform                          | No Class |
| 1426205_at   | LOC100044953 /// Ppp1cb              | similar to protein phosphatase 1 /// protein phosphatase 1, catalytic subunit, beta isoform                          | No Class |
| 1451651_at   | LOC100044885 /// Vsig4               | similar to V-set and immunoglobulin domain containing 4 /// V-set and immunoglobulin domain containing               | No Class |
| 1457667_x_at | LOC100044376                         | similar to Dual-specificity tyrosine-(Y)-phosphorylation regulated kinase 2                                          | No Class |



|              |                                      |                                                                                                                |          |
|--------------|--------------------------------------|----------------------------------------------------------------------------------------------------------------|----------|
| 1421063_s_at | LOC100044139 /// Snrpn /// Snurf     | similar to SNRPN upstream reading frame protein /// small nuclear ribonucleoprotein N /// SNRPN upstream       | No Class |
| 1450906_at   | LOC100044106 /// Plxnc1              | similar to plexin C1 /// plexin C1                                                                             | No Class |
| 1443434_s_at | LOC100044106 /// Plxnc1              | similar to plexin C1 /// plexin C1                                                                             | No Class |
| 1450328_at   | LOC100043315                         | hypothetical LOC100043315                                                                                      | No Class |
| 1448025_at   | LOC100038947 /// Sirpb1a /// Sirpb1b | signal-regulatory protein beta 1-like /// signal-regulatory protein beta 1A /// signal-regulatory protein beta | No Class |
| 1450251_a_at | Ln timer                             | ligand of numb-protein X 1                                                                                     | No Class |
| 1433747_at   | Ln timer                             | leucyl/cystinyl aminopeptidase                                                                                 | No Class |
| 1453035_at   | Ln timer                             | limb and neural patterns                                                                                       | No Class |
| 1454619_at   | Ln timer                             | lipase maturation factor 2                                                                                     | No Class |
| 1425605_a_at | Ln timer                             | limb region 1                                                                                                  | No Class |
| 1428130_at   | Ln timer                             | lectin, mannose-binding, 1                                                                                     | No Class |
| 1428129_at   | Ln timer                             | lectin, mannose-binding, 1                                                                                     | No Class |
| 1444427_at   | Ln timer                             | lipase, member 1                                                                                               | No Class |
| 1446782_at   | Ln timer                             | lines homolog 2 (Drosophila)                                                                                   | No Class |
| 1443984_at   | Ln timer                             | lin-9 homolog (C. elegans)                                                                                     | No Class |
| 1458582_at   | Ln timer                             | lin-54 homolog (C. elegans)                                                                                    | No Class |
| 1418231_at   | Ln timer                             | LIM and senescent cell antigen-like domains 1                                                                  | No Class |
| 1452060_a_at | Ln timer                             | LIM motif-containing protein kinase 2                                                                          | No Class |
| 1418581_a_at | Ln timer                             | LIM motif-containing protein kinase 2                                                                          | No Class |
| 1448500_a_at | Ln timer                             | Lck interacting transmembrane adaptor 1                                                                        | No Class |
| 1437589_x_at | Ln timer                             | Lck interacting transmembrane adaptor 1                                                                        | No Class |
| 1416869_x_at | Ln timer                             | Lck interacting transmembrane adaptor 1                                                                        | No Class |
| 1447766_x_at | Ln timer                             | LIM domain containing 2                                                                                        | No Class |
| 1450629_at   | Ln timer                             | LIM domain and actin binding 1                                                                                 | No Class |
| 1435727_s_at | Ln timer                             | LIM domain and actin binding 1                                                                                 | No Class |
| 1422499_at   | Ln timer                             | LIM domain and actin binding 1                                                                                 | No Class |
| 1424302_at   | Ln timer                             | leukocyte immunoglobulin-like receptor, subfamily B (with TM and ITIM domains), member 3                       | No Class |
| 1450428_at   | Ln timer                             | LIM homeobox protein 1                                                                                         | No Class |
| 1421951_at   | Ln timer                             | LIM homeobox protein 1                                                                                         | No Class |
| 1442043_at   | Ln timer                             | lipoma HMGIC fusion partner-like protein 4                                                                     | No Class |
| 1433776_at   | Ln timer                             | lipoma HMGIC fusion partner                                                                                    | No Class |
| 1455797_x_at | Ln timer                             | ligatin                                                                                                        | No Class |
| 1451211_a_at | Ln timer                             | ligatin                                                                                                        | No Class |
| 1436724_a_at | Ln timer                             | ligatin                                                                                                        | No Class |
| 1422662_at   | Ln timer                             | lectin, galactose binding, soluble 8                                                                           | No Class |
| 1422661_at   | Ln timer                             | lectin, galactose binding, soluble 8                                                                           | No Class |
| 1448380_at   | Ln timer                             | lectin, galactoside-binding, soluble, 3 binding protein                                                        | No Class |
| 1417079_s_at | Ln timer                             | lectin, galactose-binding, soluble 2                                                                           | No Class |
| 1417078_at   | Ln timer                             | lectin, galactose-binding, soluble 2                                                                           | No Class |
| 1437116_at   | Ln timer                             | LETM1 domain containing 1                                                                                      | No Class |
| 1456156_at   | Ln timer                             | leptin receptor                                                                                                | No Class |
| 1425875_a_at | Ln timer                             | leptin receptor                                                                                                | No Class |
| 1425644_at   | Ln timer                             | leptin receptor                                                                                                | No Class |
| 1455293_at   | Ln timer                             | Leo1, Paf1/RNA polymerase II complex component, homolog (S. cerevisiae)                                        | No Class |
| 1450383_at   | Ln timer                             | low density lipoprotein receptor                                                                               | No Class |
| 1421821_at   | Ln timer                             | low density lipoprotein receptor                                                                               | No Class |
| 1418642_at   | Ln timer                             | lymphocyte cytosolic protein 2                                                                                 | No Class |
| 1418641_at   | Ln timer                             | lymphocyte cytosolic protein 2                                                                                 | No Class |
| 1455260_at   | Ln timer                             | ligand dependent nuclear receptor corepressor-like                                                             | No Class |
| 1443779_s_at | Ln timer                             | ligand dependent nuclear receptor corepressor                                                                  | No Class |
| 1419317_x_at | Ln timer                             | late cornified envelope 3C                                                                                     | No Class |
| 1429641_x_at | Ln timer                             | late cornified envelope 3B                                                                                     | No Class |
| 1451629_at   | Ln timer                             | limb-bud and heart                                                                                             | No Class |
| 1419679_at   | Ln timer                             | large tumor suppressor 2                                                                                       | No Class |
| 1419678_at   | Ln timer                             | large tumor suppressor 2                                                                                       | No Class |
| 1460173_at   | Ln timer                             | LIM and SH3 protein 1                                                                                          | No Class |
| 1456469_x_at | Ln timer                             | LIM and SH3 protein 1                                                                                          | No Class |

|              |            |                                                                 |          |
|--------------|------------|-----------------------------------------------------------------|----------|
| 1439264_x_at | Lasp1      | LIM and SH3 protein 1                                           | No Class |
| 1438634_x_at | Lasp1      | LIM and SH3 protein 1                                           | No Class |
| 1438633_x_at | Lasp1      | LIM and SH3 protein 1                                           | No Class |
| 1448403_at   | Lars       | leucyl-tRNA synthetase                                          | No Class |
| 1428310_at   | Larp7      | La ribonucleoprotein domain family, member 7                    | No Class |
| 1418400_at   | Larp6      | La ribonucleoprotein domain family, member 6                    | No Class |
| 1451508_at   | Larp1b     | La ribonucleoprotein domain family, member 1B                   | No Class |
| 1459841_x_at | Laptm5     | lysosomal-associated protein transmembrane 5                    | No Class |
| 1436905_x_at | Laptm5     | lysosomal-associated protein transmembrane 5                    | No Class |
| 1426025_s_at | Laptm5     | lysosomal-associated protein transmembrane 5                    | No Class |
| 1417721_s_at | Laptm5     | lysosomal-associated protein transmembrane 5                    | No Class |
| 1438365_x_at | Laptm4b    | lysosomal-associated protein transmembrane 4B                   | No Class |
| 1436915_x_at | Laptm4b    | lysosomal-associated protein transmembrane 4B                   | No Class |
| 1417650_at   | Lao1       | L-amino acid oxidase 1                                          | No Class |
| 1420857_at   | Lancl2     | LanC (bacterial lantibiotic synthetase component C)-like 2      | No Class |
| 1420856_a_at | Lancl2     | LanC (bacterial lantibiotic synthetase component C)-like 2      | No Class |
| 1416344_at   | Lamp2      | lysosomal-associated membrane protein 2                         | No Class |
| 1416343_a_at | Lamp2      | lysosomal-associated membrane protein 2                         | No Class |
| 1421279_at   | Lamc2      | laminin, gamma 2                                                | No Class |
| 1423886_at   | Lamc1      | laminin, gamma 1                                                | No Class |
| 1423885_at   | Lamc1      | laminin, gamma 1                                                | No Class |
| 1417812_a_at | Lamb3      | laminin, beta 3                                                 | No Class |
| 1416513_at   | Lamb2      | laminin, beta 2                                                 | No Class |
| 1451241_at   | Lamb1-1    | laminin B1 subunit 1                                            | No Class |
| 1424114_s_at | Lamb1-1    | laminin B1 subunit 1                                            | No Class |
| 1424113_at   | Lamb1-1    | laminin B1 subunit 1                                            | No Class |
| 1424808_at   | Lama4      | laminin, alpha 4                                                | No Class |
| 1424807_at   | Lama4      | laminin, alpha 4                                                | No Class |
| 1427512_a_at | Lama3      | laminin, alpha 3                                                | No Class |
| 1419352_at   | I7Rn6      | lethal, Chr 7, Rinchik 6                                        | No Class |
| 1419351_a_at | I7Rn6      | lethal, Chr 7, Rinchik 6                                        | No Class |
| 1433777_at   | L3mbtl2    | l(3)mbt-like 2 (Drosophila)                                     | No Class |
| 1430728_at   | Krtap5-5   | keratin associated protein 5-5                                  | No Class |
| 1450540_x_at | Krtap5-1   | keratin associated protein 5-1                                  | No Class |
| 1450539_at   | Krtap5-1   | keratin associated protein 5-1                                  | No Class |
| 1421494_at   | Krtap4-2   | keratin associated protein 4-2                                  | No Class |
| 1422298_at   | Krtap28-13 | keratin associated protein 28-13                                | No Class |
| 1429957_at   | Krtap26-1  | keratin associated protein 26-1                                 | No Class |
| 1453279_x_at | Krt76      | keratin 76                                                      | No Class |
| 1436557_at   | Krt73      | keratin 73                                                      | No Class |
| 1420728_at   | Krt32      | keratin 32                                                      | No Class |
| 1458354_x_at | Krt28      | keratin 28                                                      | No Class |
| 1444726_at   | Krr1       | KRR1, small subunit (SSU) processome component, homolog (yeast) | No Class |
| 1428084_at   | Krr1       | KRR1, small subunit (SSU) processome component, homolog (yeast) | No Class |
| 1442125_at   | Krit1      | KRIT1, ankyrin repeat containing                                | No Class |
| 1439317_at   | Krit1      | KRIT1, ankyrin repeat containing                                | No Class |
| 1428730_at   | Krit1      | KRIT1, ankyrin repeat containing                                | No Class |
| 1428729_at   | Krit1      | KRIT1, ankyrin repeat containing                                | No Class |
| 1424621_at   | Krcc1      | lysine-rich coiled-coil 1                                       | No Class |
| 1428980_at   | Kprp       | keratinocyte expressed, proline-rich                            | No Class |
| 1434357_a_at | Kpnb1      | karyopherin (importin) beta 1                                   | No Class |
| 1449504_at   | Kpna1      | karyopherin (importin) alpha 1                                  | No Class |
| 1449503_at   | Kpna1      | karyopherin (importin) alpha 1                                  | No Class |
| 1419548_at   | Kpna1      | karyopherin (importin) alpha 1                                  | No Class |
| 1418998_at   | Kmo        | kynurenine 3-monooxygenase (kynurenine 3-hydroxylase)           | No Class |
| 1420789_at   | Klra5      | killer cell lectin-like receptor, subfamily A, member 5         | No Class |
| 1423542_at   | Klk7       | kallikrein related-peptidase 7 (chymotryptic, stratum corneum)  | No Class |

|              |           |                                                                           |          |
|--------------|-----------|---------------------------------------------------------------------------|----------|
| 1419090_x_at | Klk1b26   | kallikrein 1-related petidase b26                                         | No Class |
| 1425144_at   | Klk1b11   | kallikrein 1-related peptidase b11                                        | No Class |
| 1428721_at   | Klh128    | kelch-like 28 (Drosophila)                                                | No Class |
| 1425664_at   | Klh120    | kelch-like 20 (Drosophila)                                                | No Class |
| 1435818_at   | Klh115    | kelch-like 15 (Drosophila)                                                | No Class |
| 1448269_a_at | Klh113    | kelch-like 13 (Drosophila)                                                | No Class |
| 1416242_at   | Klh113    | kelch-like 13 (Drosophila)                                                | No Class |
| 1424885_at   | Klhdc8a   | kelch domain containing 8A                                                | No Class |
| 1435086_s_at | Klhdc2    | kelch domain containing 2                                                 | No Class |
| 1428771_at   | Klhdc10   | kelch domain containing 10                                                | No Class |
| 1436952_at   | Klf9      | Kruppel-like factor 9                                                     | No Class |
| 1436763_a_at | Klf9      | Kruppel-like factor 9                                                     | No Class |
| 1422264_s_at | Klf9      | Kruppel-like factor 9                                                     | No Class |
| 1449439_at   | Klf7      | Kruppel-like factor 7 (ubiquitous)                                        | No Class |
| 1419356_at   | Klf7      | Kruppel-like factor 7 (ubiquitous)                                        | No Class |
| 1419355_at   | Klf7      | Kruppel-like factor 7 (ubiquitous)                                        | No Class |
| 1451739_at   | Klf5      | Kruppel-like factor 5                                                     | No Class |
| 1417394_at   | Klf4      | Kruppel-like factor 4 (gut)                                               | No Class |
| 1436316_at   | Klf13     | Kruppel-like factor 13                                                    | No Class |
| 1455521_at   | Klf12     | Kruppel-like factor 12                                                    | No Class |
| 1439847_s_at | Klf12     | Kruppel-like factor 12                                                    | No Class |
| 1439846_at   | Klf12     | Kruppel-like factor 12                                                    | No Class |
| 1425547_a_at | Klc4      | kinesin light chain 4                                                     | No Class |
| 1417005_at   | Klc1      | kinesin light chain 1                                                     | No Class |
| 1417181_a_at | Kifap3    | kinesin-associated protein 3                                              | No Class |
| 1434670_at   | Kif5a     | kinesin family member 5A                                                  | No Class |
| 1450073_at   | Kif3b     | kinesin family member 3B                                                  | No Class |
| 1420987_at   | Kif3b     | kinesin family member 3B                                                  | No Class |
| 1455652_at   | Kif3a     | kinesin family member 3A                                                  | No Class |
| 1449841_at   | Kif3a     | kinesin family member 3A                                                  | No Class |
| 1436560_at   | Kif3a     | kinesin family member 3A                                                  | No Class |
| 1420375_at   | Kif3a     | kinesin family member 3A                                                  | No Class |
| 1437611_x_at | Kif2c     | kinesin family member 2C                                                  | No Class |
| 1454107_a_at | Kif2a     | kinesin family member 2A                                                  | No Class |
| 1452499_a_at | Kif2a     | kinesin family member 2A                                                  | No Class |
| 1450052_at   | Kif2a     | kinesin family member 2A                                                  | No Class |
| 1457074_at   | Kif24     | kinesin family member 24                                                  | No Class |
| 1455990_at   | Kif23     | kinesin family member 23                                                  | No Class |
| 1455029_at   | Kif21a    | kinesin family member 21A                                                 | No Class |
| 1451890_at   | Kif13a    | kinesin family member 13A                                                 | No Class |
| 1430449_at   | Kidins220 | kinase D-interacting substrate 220                                        | No Class |
| 1438462_x_at | Khdrbs1   | KH domain containing, RNA binding, signal transduction associated 1       | No Class |
| 1434541_x_at | Khdrbs1   | KH domain containing, RNA binding, signal transduction associated 1       | No Class |
| 1418629_a_at | Khdrbs1   | KH domain containing, RNA binding, signal transduction associated 1       | No Class |
| 1418628_at   | Khdrbs1   | KH domain containing, RNA binding, signal transduction associated 1       | No Class |
| 1450747_at   | Keap1     | kelch-like ECH-associated protein 1                                       | No Class |
| 1456610_at   | Kdm6b     | KDM1 lysine (K)-specific demethylase 6B                                   | No Class |
| 1442643_at   | Kdm6b     | KDM1 lysine (K)-specific demethylase 6B                                   | No Class |
| 1440346_at   | Kdm6b     | KDM1 lysine (K)-specific demethylase 6B                                   | No Class |
| 1445198_at   | Kdm6a     | 4lysine (K)-specific demethylase 6A                                       | No Class |
| 1427672_a_at | Kdm6a     | 4lysine (K)-specific demethylase 6A                                       | No Class |
| 1427235_at   | Kdm6a     | 4lysine (K)-specific demethylase 6A                                       | No Class |
| 1441449_at   | Kdm5c     | lysine (K)-specific demethylase 5C                                        | No Class |
| 1452198_at   | Kdm2b     | lysine (K)-specific demethylase 2B                                        | No Class |
| 1418538_at   | Kdelr3    | KDEL (Lys-Asp-Glu-Leu) endoplasmic reticulum protein retention receptor 3 | No Class |
| 1435339_at   | Kctd15    | potassium channel tetramerisation domain containing 15                    | No Class |
| 1441511_at   | Kcnt1     | potassium channel, subfamily T, member 1                                  | No Class |

|              |          |                                                                                    |          |
|--------------|----------|------------------------------------------------------------------------------------|----------|
| 1426080_a_at | Kcnq2    | potassium voltage-gated channel, subfamily Q, member 2                             | No Class |
| 1426006_at   | Kcnq2    | potassium voltage-gated channel, subfamily Q, member 2                             | No Class |
| 1428948_at   | Kcnma1   | potassium large conductance calcium-activated channel, subfamily M, alpha member 1 | No Class |
| 1425987_a_at | Kcnma1   | potassium large conductance calcium-activated channel, subfamily M, alpha member 1 | No Class |
| 1424125_at   | Kcnk13   | potassium channel, subfamily K, member 13                                          | No Class |
| 1441280_at   | Kcnk12   | potassium channel, subfamily K, member 12                                          | No Class |
| 1455896_a_at | Kcnk1    | potassium channel, subfamily K, member 1                                           | No Class |
| 1448690_at   | Kcnk1    | potassium channel, subfamily K, member 1                                           | No Class |
| 1451868_at   | Kcnj6    | potassium inwardly-rectifying channel, subfamily J, member 6                       | No Class |
| 1418614_at   | Kcnj1    | potassium inwardly-rectifying channel, subfamily J, member 1                       | No Class |
| 1451840_at   | Kcnip4   | Kv channel interacting protein 4                                                   | No Class |
| 1437631_at   | Kcnip4   | Kv channel interacting protein 4                                                   | No Class |
| 1418414_at   | Kcnc1    | potassium voltage-gated channel, subfamily H (eag-related), member 1               | No Class |
| 1440861_a_at | Kcnc3    | potassium voltage gated channel, Shaw-related subfamily, member 3                  | No Class |
| 1454043_a_at | Kcnab1   | potassium voltage-gated channel, shaker-related subfamily, beta member 1           | No Class |
| 1448468_a_at | Kcnab1   | potassium voltage-gated channel, shaker-related subfamily, beta member 1           | No Class |
| 1422197_at   | Kcna2    | potassium voltage-gated channel, shaker-related subfamily, member 2                | No Class |
| 1431436_a_at | Katnal2  | katanin p60 subunit A-like 2                                                       | No Class |
| 1429663_at   | Katnal2  | katanin p60 subunit A-like 2                                                       | No Class |
| 1433981_s_at | Kat5     | K(lysine) acetyltransferase 5                                                      | No Class |
| 1433980_at   | Kat5     | K(lysine) acetyltransferase 5                                                      | No Class |
| 1422972_s_at | Kat2a    | K(lysine) acetyltransferase 2A                                                     | No Class |
| 1418409_at   | Jrk      | jerky                                                                              | No Class |
| 1421520_at   | Jph1     | junctophilin 1                                                                     | No Class |
| 1454109_a_at | Jmj6     | jumonji domain containing 6                                                        | No Class |
| 1459821_x_at | Jhdm1d   | jumonji C domain-containing histone demethylase 1 homolog D (S. cerevisiae)        | No Class |
| 1459820_at   | Jhdm1d   | jumonji C domain-containing histone demethylase 1 homolog D (S. cerevisiae)        | No Class |
| 1422698_s_at | Jarid2   | jumonji, AT rich interactive domain 2                                              | No Class |
| 1422697_s_at | Jarid2   | jumonji, AT rich interactive domain 2                                              | No Class |
| 1449408_at   | Jam2     | junction adhesion molecule 2                                                       | No Class |
| 1436568_at   | Jam2     | junction adhesion molecule 2                                                       | No Class |
| 1431416_a_at | Jam2     | junction adhesion molecule 2                                                       | No Class |
| 1433815_at   | Jakmip1  | janus kinase and microtubule interacting protein 1                                 | No Class |
| 1433805_at   | Jak1     | Janus kinase 1                                                                     | No Class |
| 1433803_at   | Jak1     | Janus kinase 1                                                                     | No Class |
| 1417064_at   | Jagn1    | jagunal homolog 1 (Drosophila)                                                     | No Class |
| 1435023_at   | Its1     | intersectin 2                                                                      | No Class |
| 1425899_a_at | Its1     | intersectin 1 (SH3 domain protein 1A)                                              | No Class |
| 1424037_at   | Itpka    | inositol 1,4,5-trisphosphate 3-kinase A                                            | No Class |
| 1418741_at   | Itgb7    | integrin beta 7                                                                    | No Class |
| 1432281_a_at | Itgb6    | integrin beta 6                                                                    | No Class |
| 1422983_at   | Itgb6    | integrin beta 6                                                                    | No Class |
| 1456195_x_at | Itgb5    | integrin beta 5                                                                    | No Class |
| 1456133_x_at | Itgb5    | integrin beta 5                                                                    | No Class |
| 1417534_at   | Itgb5    | integrin beta 5                                                                    | No Class |
| 1417533_a_at | Itgb5    | integrin beta 5                                                                    | No Class |
| 1450678_at   | Itgb2    | integrin beta 2                                                                    | No Class |
| 1422157_a_at | Itgb1bp1 | integrin beta 1 binding protein 1                                                  | No Class |
| 1452784_at   | Itgav    | integrin alpha V                                                                   | No Class |
| 1421198_at   | Itgav    | integrin alpha V                                                                   | No Class |
| 1454966_at   | Itga8    | integrin alpha 8                                                                   | No Class |
| 1427489_at   | Itga8    | integrin alpha 8                                                                   | No Class |
| 1423268_at   | Itga5    | integrin alpha 5 (fibronectin receptor alpha)                                      | No Class |
| 1423267_s_at | Itga5    | integrin alpha 5 (fibronectin receptor alpha)                                      | No Class |
| 1456498_at   | Itga4    | integrin alpha 4                                                                   | No Class |
| 1436037_at   | Itga4    | integrin alpha 4                                                                   | No Class |
| 1421194_at   | Itga4    | integrin alpha 4                                                                   | No Class |

|              |                       |                                                              |          |
|--------------|-----------------------|--------------------------------------------------------------|----------|
| 1460305_at   | Itga3                 | integrin alpha 3                                             | No Class |
| 1455158_at   | Itga3                 | integrin alpha 3                                             | No Class |
| 1421997_s_at | Itga3                 | integrin alpha 3                                             | No Class |
| 1431316_at   | Itch                  | itchy, E3 ubiquitin protein ligase                           | No Class |
| 1431922_at   | Isx                   | intestine specific homeobox                                  | No Class |
| 1419569_a_at | lsg20                 | interferon-stimulated protein                                | No Class |
| 1421072_at   | lrx5                  | Iroquois related homeobox 5 (Drosophila)                     | No Class |
| 1451983_at   | lrx1                  | Iroquois related homeobox 1 (Drosophila)                     | No Class |
| 1417793_at   | lrgm2                 | immunity-related GTPase family M member 2                    | No Class |
| 1448436_a_at | lrf1                  | interferon regulatory factor 1                               | No Class |
| 1451749_at   | lrak4                 | interleukin-1 receptor-associated kinase 4                   | No Class |
| 1421670_a_at | lrak4                 | interleukin-1 receptor-associated kinase 4                   | No Class |
| 1431771_a_at | lrak1bp1              | interleukin-1 receptor-associated kinase 1 binding protein 1 | No Class |
| 1422683_at   | lrak1bp1              | interleukin-1 receptor-associated kinase 1 binding protein 1 | No Class |
| 1438857_x_at | lrak1                 | interleukin-1 receptor-associated kinase 1                   | No Class |
| 1438120_x_at | lrak1                 | interleukin-1 receptor-associated kinase 1                   | No Class |
| 1434850_at   | lggap3                | IQ motif containing GTPase activating protein 3              | No Class |
| 1431395_a_at | lggap1                | IQ motif containing GTPase activating protein 1              | No Class |
| 1432060_at   | lqca                  | IQ motif containing with AAA domain                          | No Class |
| 1450814_a_at | lpo4                  | importin 4                                                   | No Class |
| 1444709_at   | lnvs                  | inversin                                                     | No Class |
| 1435250_at   | lnts8                 | integrator complex subunit 8                                 | No Class |
| 1431096_at   | lnts8                 | integrator complex subunit 8                                 | No Class |
| 1428531_at   | lnts7                 | integrator complex subunit 7                                 | No Class |
| 1443128_at   | lnts6                 | integrator complex subunit 6                                 | No Class |
| 1436089_at   | lnts6                 | integrator complex subunit 6                                 | No Class |
| 1417887_at   | lnts5                 | integrator complex subunit 5                                 | No Class |
| 1452316_at   | lnts12                | integrator complex subunit 12                                | No Class |
| 1452810_at   | lnts10                | integrator complex subunit 10                                | No Class |
| 1456412_a_at | lnpp5k                | inositol polyphosphate 5-phosphatase K                       | No Class |
| 1418110_a_at | lnpp5d                | inositol polyphosphate-5-phosphatase D                       | No Class |
| 1433605_at   | lnpp5a                | inositol polyphosphate-5-phosphatase A                       | No Class |
| 1451347_at   | lno80e                | INO80 complex subunit E                                      | No Class |
| 1424429_s_at | lno80e                | INO80 complex subunit E                                      | No Class |
| 1424428_at   | lno80e                | INO80 complex subunit E                                      | No Class |
| 1436069_at   | lng5                  | inhibitor of growth family, member 5                         | No Class |
| 1416860_s_at | lng1                  | inhibitor of growth family, member 1                         | No Class |
| 1439436_x_at | lncenp                | inner centromere protein                                     | No Class |
| 1423093_at   | lncenp                | inner centromere protein                                     | No Class |
| 1449942_a_at | llk                   | integrin linked kinase                                       | No Class |
| 1436802_at   | llf3                  | interleukin enhancer binding factor 3                        | No Class |
| 1436293_x_at | lldr2                 | immunoglobulin-like domain containing receptor 2             | No Class |
| 1436221_at   | lldr2                 | immunoglobulin-like domain containing receptor 2             | No Class |
| 1423996_a_at | ll4ra                 | interleukin 4 receptor, alpha                                | No Class |
| 1421034_a_at | ll4ra                 | interleukin 4 receptor, alpha                                | No Class |
| 1419192_at   | ll4i1 /// Nup62-il4i1 | interleukin 4 induced 1 /// Nup62-il4i1 protein              | No Class |
| 1449864_at   | ll4                   | interleukin 4                                                | No Class |
| 1419712_at   | ll3ra                 | interleukin 3 receptor, alpha chain                          | No Class |
| 1416295_a_at | ll2rg                 | interleukin 2 receptor, gamma chain                          | No Class |
| 1420691_at   | ll2ra                 | interleukin 2 receptor, alpha chain                          | No Class |
| 1460598_at   | ll28ra                | interleukin 28 receptor alpha                                | No Class |
| 1449508_at   | ll27ra                | interleukin 27 receptor, alpha                               | No Class |
| 1437665_at   | ll22ra2               | interleukin 22 receptor, alpha 2                             | No Class |
| 1449585_at   | ll1rap                | interleukin 1 receptor accessory protein                     | No Class |
| 1421844_at   | ll1rap                | interleukin 1 receptor accessory protein                     | No Class |
| 1421843_at   | ll1rap                | interleukin 1 receptor accessory protein                     | No Class |
| 1419532_at   | ll1r2                 | interleukin 1 receptor, type II                              | No Class |

|              |                                   |                                                                                                          |          |
|--------------|-----------------------------------|----------------------------------------------------------------------------------------------------------|----------|
| 1448686_at   | Il16                              | interleukin 16                                                                                           | No Class |
| 1454783_at   | Il13ra1                           | interleukin 13 receptor, alpha 1                                                                         | No Class |
| 1451775_s_at | Il13ra1                           | interleukin 13 receptor, alpha 1                                                                         | No Class |
| 1427165_at   | Il13ra1                           | interleukin 13 receptor, alpha 1                                                                         | No Class |
| 1419455_at   | Il10rb                            | interleukin 10 receptor, beta                                                                            | No Class |
| 1450330_at   | Il10                              | interleukin 10                                                                                           | No Class |
| 1457342_at   | Ikzf4                             | IKAROS family zinc finger 4                                                                              | No Class |
| 1438274_at   | Ikzf4                             | IKAROS family zinc finger 4                                                                              | No Class |
| 1453378_at   | Ikzf3                             | IKAROS family zinc finger 3                                                                              | No Class |
| 1436649_at   | Ikzf3                             | IKAROS family zinc finger 3                                                                              | No Class |
| 1436312_at   | Ikzf1                             | IKAROS family zinc finger 1                                                                              | No Class |
| 1421303_at   | Ikzf1                             | IKAROS family zinc finger 1                                                                              | No Class |
| 1426333_a_at | Ikbkb                             | inhibitor of kappaB kinase beta                                                                          | No Class |
| 1417141_at   | Igtp                              | interferon gamma induced GTPase                                                                          | No Class |
| 1441420_at   | Igsf9                             | immunoglobulin superfamily, member 9                                                                     | No Class |
| 1420518_a_at | Igsf9                             | immunoglobulin superfamily, member 9                                                                     | No Class |
| 1455049_at   | Igsf3                             | immunoglobulin superfamily, member 3                                                                     | No Class |
| 1455048_at   | Igsf3                             | immunoglobulin superfamily, member 3                                                                     | No Class |
| 1456463_at   | Iglon5                            | IgLON family member 5                                                                                    | No Class |
| 1451951_at   | Igkv14-111                        | Immunoglobulin kappa chain variable 14-111                                                               | No Class |
| 1424305_at   | Igj                               | immunoglobulin joining chain                                                                             | No Class |
| 1427852_x_at | Igh-VJ558                         | immunoglobulin heavy chain (J558 family)                                                                 | No Class |
| 1427351_s_at | Igh-6                             | immunoglobulin heavy chain 6 (heavy chain of IgM)                                                        | No Class |
| 1427329_a_at | Igh-6                             | immunoglobulin heavy chain 6 (heavy chain of IgM)                                                        | No Class |
| 1429381_x_at | Igh-2 /// Igh-VJ558 /// LOC544903 | immunoglobulin heavy chain 2 (serum IgA) /// immunoglobulin heavy chain (J558 family) /// similar to imm | No Class |
| 1425763_x_at | Igh-2 /// Igh-VJ558 /// LOC544903 | immunoglobulin heavy chain 2 (serum IgA) /// immunoglobulin heavy chain (J558 family) /// similar to imm | No Class |
| 1421653_a_at | Igh-2 /// Igh-VJ558 /// LOC544903 | immunoglobulin heavy chain 2 (serum IgA) /// immunoglobulin heavy chain (J558 family) /// similar to imm | No Class |
| 1417933_at   | Igfbp6                            | insulin-like growth factor binding protein 6                                                             | No Class |
| 1437406_x_at | Igfbp4                            | insulin-like growth factor binding protein 4                                                             | No Class |
| 1437405_a_at | Igfbp4                            | insulin-like growth factor binding protein 4                                                             | No Class |
| 1423757_x_at | Igfbp4                            | insulin-like growth factor binding protein 4                                                             | No Class |
| 1423756_s_at | Igfbp4                            | insulin-like growth factor binding protein 4                                                             | No Class |
| 1421992_a_at | Igfbp4                            | insulin-like growth factor binding protein 4                                                             | No Class |
| 1421991_a_at | Igfbp4                            | insulin-like growth factor binding protein 4                                                             | No Class |
| 1458268_s_at | Igfbp3                            | insulin-like growth factor binding protein 3                                                             | No Class |
| 1423062_at   | Igfbp3                            | insulin-like growth factor binding protein 3                                                             | No Class |
| 1454159_a_at | Igfbp2                            | insulin-like growth factor binding protein 2                                                             | No Class |
| 1453957_a_at | Igf2bp3                           | insulin-like growth factor 2 mRNA binding protein 3                                                      | No Class |
| 1450687_at   | Igf2bp3                           | insulin-like growth factor 2 mRNA binding protein 3                                                      | No Class |
| 1422611_s_at | Igf2bp3                           | insulin-like growth factor 2 mRNA binding protein 3                                                      | No Class |
| 1422610_s_at | Igf2bp3                           | insulin-like growth factor 2 mRNA binding protein 3                                                      | No Class |
| 1452014_a_at | Igf1                              | insulin-like growth factor 1                                                                             | No Class |
| 1437401_at   | Igf1                              | insulin-like growth factor 1                                                                             | No Class |
| 1434413_at   | Igf1                              | insulin-like growth factor 1                                                                             | No Class |
| 1419519_at   | Igf1                              | insulin-like growth factor 1                                                                             | No Class |
| 1444981_at   | Igdcc3                            | Immunoglobulin superfamily, DCC subclass, member 3                                                       | No Class |
| 1418942_at   | Ift74                             | intraflagellar transport 74 homolog (Chlamydomonas)                                                      | No Class |
| 1418929_at   | Ift57                             | intraflagellar transport 57 homolog (Chlamydomonas)                                                      | No Class |
| 1435736_x_at | Ift27                             | intraflagellar transport 27 homolog (Chlamydomonas)                                                      | No Class |
| 1434299_x_at | Ift27                             | intraflagellar transport 27 homolog (Chlamydomonas)                                                      | No Class |
| 1424648_at   | Ift27                             | intraflagellar transport 27 homolog (Chlamydomonas)                                                      | No Class |
| 1441259_s_at | Ift122                            | intraflagellar transport 122 homolog (Chlamydomonas)                                                     | No Class |
| 1427239_at   | Ift122                            | intraflagellar transport 122 homolog (Chlamydomonas)                                                     | No Class |
| 1425947_at   | Iftng                             | interferon gamma                                                                                         | No Class |
| 1429920_at   | Ifttd1                            | intermediate filament tail domain containing 1                                                           | No Class |
| 1453917_at   | Ifttm7                            | interferon induced transmembrane protein 7                                                               | No Class |
| 1426276_at   | Ifh1                              | interferon induced with helicase C domain 1                                                              | No Class |

|              |                      |                                                                              |          |
|--------------|----------------------|------------------------------------------------------------------------------|----------|
| 1459151_x_at | lfi35                | interferon-induced protein 35                                                | No Class |
| 1445897_s_at | lfi35                | interferon-induced protein 35                                                | No Class |
| 1424617_at   | lfi35                | interferon-induced protein 35                                                | No Class |
| 1454757_s_at | lfi2711              | interferon, alpha-inducible protein 27 like 1                                | No Class |
| 1452956_a_at | lfi2711              | interferon, alpha-inducible protein 27 like 1                                | No Class |
| 1442828_at   | lfi204               | Interferon activated gene 204                                                | No Class |
| 1419647_a_at | ler3                 | immediate early response 3                                                   | No Class |
| 1449230_at   | ldua                 | iduronidase, alpha-L-                                                        | No Class |
| 1450166_at   | lds                  | iduronate 2-sulfatase                                                        | No Class |
| 1447701_x_at | ldh3a                | isocitrate dehydrogenase 3 (NAD+) alpha                                      | No Class |
| 1432016_a_at | ldh3a                | isocitrate dehydrogenase 3 (NAD+) alpha                                      | No Class |
| 1422501_s_at | ldh3a                | isocitrate dehydrogenase 3 (NAD+) alpha                                      | No Class |
| 1422500_at   | ldh3a                | isocitrate dehydrogenase 3 (NAD+) alpha                                      | No Class |
| 1422433_s_at | ldh1                 | isocitrate dehydrogenase 1 (NADP+), soluble                                  | No Class |
| 1423260_at   | ld4 /// LOC100045546 | inhibitor of DNA binding 4 /// similar to ld4                                | No Class |
| 1438441_at   | ld4                  | Inhibitor of DNA binding 4                                                   | No Class |
| 1416630_at   | ld3                  | inhibitor of DNA binding 3                                                   | No Class |
| 1426087_at   | lcosl                | icos ligand                                                                  | No Class |
| 1436598_at   | lcos                 | inducible T-cell co-stimulator                                               | No Class |
| 1421931_at   | lcos                 | inducible T-cell co-stimulator                                               | No Class |
| 1421930_at   | lcos                 | inducible T-cell co-stimulator                                               | No Class |
| 1448310_at   | lck                  | intestinal cell kinase                                                       | No Class |
| 1417484_at   | lbsp                 | integrin binding sialoprotein                                                | No Class |
| 1452154_at   | lars                 | isoleucine-tRNA synthetase                                                   | No Class |
| 1426705_s_at | lars                 | isoleucine-tRNA synthetase                                                   | No Class |
| 1424032_at   | Hvcn1                | hydrogen voltage-gated channel 1                                             | No Class |
| 1448056_at   | Huwe1                | HECT, UBA and WWE domain containing 1                                        | No Class |
| 1437273_at   | Htra4                | Htra serine peptidase 4                                                      | No Class |
| 1438251_x_at | Htra1                | Htra serine peptidase 1                                                      | No Class |
| 1416749_at   | Htra1                | Htra serine peptidase 1                                                      | No Class |
| 1422125_at   | Htr2b                | 5-hydroxytryptamine (serotonin) receptor 2B                                  | No Class |
| 1418670_s_at | Hspg2                | perlecan (heparan sulfate proteoglycan 2)                                    | No Class |
| 1450668_s_at | Hspe1                | heat shock protein 1 (chaperonin 10)                                         | No Class |
| 1426351_at   | Hspd1                | heat shock protein 1 (chaperonin)                                            | No Class |
| 1428566_at   | Hspbap1              | Hspb associated protein 1                                                    | No Class |
| 1431274_a_at | Hspa9                | heat shock protein 9                                                         | No Class |
| 1420623_x_at | Hspa8                | heat shock protein 8                                                         | No Class |
| 1420622_a_at | Hspa8                | heat shock protein 8                                                         | No Class |
| 1427464_s_at | Hspa5                | heat shock protein 5                                                         | No Class |
| 1416064_a_at | Hspa5                | heat shock protein 5                                                         | No Class |
| 1458385_at   | Hspa4l               | heat shock protein 4 like                                                    | No Class |
| 1449010_at   | Hspa4l               | heat shock protein 4 like                                                    | No Class |
| 1418253_a_at | Hspa4l               | heat shock protein 4 like                                                    | No Class |
| 1448586_at   | Hspa14               | heat shock protein 14                                                        | No Class |
| 1417095_a_at | Hspa14               | heat shock protein 14                                                        | No Class |
| 1453172_at   | Hspa13               | heat shock protein 70 family, member 13                                      | No Class |
| 1430026_at   | Hspa13               | heat shock protein 70 family, member 13                                      | No Class |
| 1429502_at   | Hspa13               | heat shock protein 70 family, member 13                                      | No Class |
| 1416364_at   | Hsp90ab1             | heat shock protein 90 alpha (cytosolic), class B member 1                    | No Class |
| 1441827_x_at | Hsp90aa1             | heat shock protein 90, alpha (cytosolic), class A member 1                   | No Class |
| 1438902_a_at | Hsp90aa1             | heat shock protein 90, alpha (cytosolic), class A member 1                   | No Class |
| 1437497_a_at | Hsp90aa1             | heat shock protein 90, alpha (cytosolic), class A member 1                   | No Class |
| 1426645_at   | Hsp90aa1             | heat shock protein 90, alpha (cytosolic), class A member 1                   | No Class |
| 1428640_at   | Hsf2bp               | heat shock transcription factor 2 binding protein                            | No Class |
| 1424622_at   | Hsf1                 | heat shock factor 1                                                          | No Class |
| 1420531_at   | Hsd3b5               | hydroxy-delta-5-steroid dehydrogenase, 3 beta- and steroid delta-isomerase 5 | No Class |
| 1450010_at   | Hsd17b12             | hydroxysteroid (17-beta) dehydrogenase 12                                    | No Class |

|              |           |                                                                                                     |          |
|--------------|-----------|-----------------------------------------------------------------------------------------------------|----------|
| 1451162_at   | Hsbp1     | heat shock factor binding protein 1                                                                 | No Class |
| 1455620_at   | Hs3st4    | heparan sulfate (glucosamine) 3-O-sulfotransferase 4                                                | No Class |
| 1450729_at   | Hs2st1    | heparan sulfate 2-O-sulfotransferase 1                                                              | No Class |
| 1422407_s_at | Hras1     | Harvey rat sarcoma virus oncogene 1                                                                 | No Class |
| 1450647_at   | Hps3      | Hermansky-Pudlak syndrome 3 homolog (human)                                                         | No Class |
| 1459598_at   | Hps1      | Hermansky-Pudlak syndrome 1 homolog (human)                                                         | No Class |
| 1425833_a_at | Hpca      | hippocalcin                                                                                         | No Class |
| 1418415_at   | Hoxb5     | homeobox B5                                                                                         | No Class |
| 1449499_at   | Hoxa7     | homeobox A7                                                                                         | No Class |
| 1448926_at   | Hoxa5     | homeobox A5                                                                                         | No Class |
| 1420414_at   | Hoxa11    | homeobox A11                                                                                        | No Class |
| 1439173_at   | Hook1     | hook homolog 1 (Drosophila)                                                                         | No Class |
| 1438018_at   | Hook1     | hook homolog 1 (Drosophila)                                                                         | No Class |
| 1448176_a_at | Hnrnpk    | heterogeneous nuclear ribonucleoprotein K                                                           | No Class |
| 1423684_at   | Hnrnpk    | heterogeneous nuclear ribonucleoprotein K                                                           | No Class |
| 1415914_at   | Hnrnpab   | heterogeneous nuclear ribonucleoprotein A/B                                                         | No Class |
| 1455305_x_at | Hnrnpa1   | heterogeneous nuclear ribonucleoprotein A1                                                          | No Class |
| 1430020_x_at | Hnrnpa1   | heterogeneous nuclear ribonucleoprotein A1                                                          | No Class |
| 1423531_a_at | Hnrnpa1   | heterogeneous nuclear ribonucleoprotein A1                                                          | No Class |
| 1451687_a_at | Hnf1b     | HNF1 homeobox B                                                                                     | No Class |
| 1433696_at   | Hn1l      | hematological and neurological expressed 1-like                                                     | No Class |
| 1416028_a_at | Hn1       | hematological and neurological expressed sequence 1                                                 | No Class |
| 1423858_a_at | Hmgcs2    | 3-hydroxy-3-methylglutaryl-Coenzyme A synthase 2                                                    | No Class |
| 1441536_at   | Hmgcs1    | 3-hydroxy-3-methylglutaryl-Coenzyme A synthase 1                                                    | No Class |
| 1452534_a_at | Hmgb2     | high mobility group box 2                                                                           | No Class |
| 1435324_x_at | Hmgb1     | high mobility group box 1                                                                           | No Class |
| 1425048_a_at | Hmgb1     | high mobility group box 1                                                                           | No Class |
| 1450781_at   | Hmga2     | high mobility group AT-hook 2                                                                       | No Class |
| 1450780_s_at | Hmga2     | high mobility group AT-hook 2                                                                       | No Class |
| 1446196_at   | Hmga2     | high mobility group AT-hook 2                                                                       | No Class |
| 1422851_at   | Hmga2     | high mobility group AT-hook 2                                                                       | No Class |
| 1443020_at   | Hmbox1    | homeobox containing 1                                                                               | No Class |
| 1459421_at   | Hkdc1     | hexokinase domain containing 1                                                                      | No Class |
| 1442051_at   | Hist2h3c1 | histone cluster 2, H3c1                                                                             | No Class |
| 1434936_at   | Hirip3    | HIRA interacting protein 3                                                                          | No Class |
| 1419191_at   | Hipk3     | homeodomain interacting protein kinase 3                                                            | No Class |
| 1448631_a_at | Hipk2     | homeodomain interacting protein kinase 2                                                            | No Class |
| 1425983_x_at | Hipk2     | homeodomain interacting protein kinase 2                                                            | No Class |
| 1424863_a_at | Hipk2     | homeodomain interacting protein kinase 2                                                            | No Class |
| 1425988_a_at | Hipk1     | homeodomain interacting protein kinase 1                                                            | No Class |
| 1421298_a_at | Hipk1     | homeodomain interacting protein kinase 1                                                            | No Class |
| 1432017_at   | Hip1      | huntingtin interacting protein 1                                                                    | No Class |
| 1418583_at   | Hint3     | histidine triad nucleotide binding protein 3                                                        | No Class |
| 1418002_at   | Higd2a    | HIG1 domain family, member 2A                                                                       | No Class |
| 1448359_a_at | Higd1a    | HIG1 domain family, member 1A                                                                       | No Class |
| 1416481_s_at | Higd1a    | HIG1 domain family, member 1A                                                                       | No Class |
| 1446708_at   | Hif3a     | hypoxia inducible factor 3, alpha subunit                                                           | No Class |
| 1418405_at   | Hgfac     | hepatocyte growth factor activator                                                                  | No Class |
| 1451866_a_at | Hgf       | hepatocyte growth factor                                                                            | No Class |
| 1425379_at   | Hgf       | hepatocyte growth factor                                                                            | No Class |
| 1422645_at   | Hfe       | hemochromatosis                                                                                     | No Class |
| 1443828_x_at | Herpud2   | HERPUD family member 2                                                                              | No Class |
| 1415982_at   | Herpud2   | HERPUD family member 2                                                                              | No Class |
| 1438814_at   | Herc4     | hect domain and RLD 4                                                                               | No Class |
| 1444228_s_at | Herc2     | hect (homologous to the E6-AP (UBE3A) carboxyl terminus) domain and RCC1 (CHC1)-like domain (RLD) 2 | No Class |
| 1435939_s_at | Hepacam2  | HEPACAM family member 2                                                                             | No Class |
| 1444942_at   | Helz      | helicase with zinc finger domain                                                                    | No Class |



|              |                                  |                                                                                                                 |          |
|--------------|----------------------------------|-----------------------------------------------------------------------------------------------------------------|----------|
| 1453361_at   | Hells                            | helicase, lymphoid specific                                                                                     | No Class |
| 1430139_at   | Hells                            | helicase, lymphoid specific                                                                                     | No Class |
| 1419235_s_at | Helb                             | helicase (DNA) B                                                                                                | No Class |
| 1438085_at   | Heatr5b                          | HEAT repeat containing 5B                                                                                       | No Class |
| 1424522_at   | Heatr1                           | HEAT repeat containing 1                                                                                        | No Class |
| 1449615_s_at | Hdlbp                            | high density lipoprotein (HDL) binding protein                                                                  | No Class |
| 1419869_s_at | Hdlbp                            | high density lipoprotein (HDL) binding protein                                                                  | No Class |
| 1419806_at   | Hdlbp                            | high density lipoprotein (HDL) binding protein                                                                  | No Class |
| 1415988_at   | Hdlbp                            | high density lipoprotein (HDL) binding protein                                                                  | No Class |
| 1415987_at   | Hdlbp                            | high density lipoprotein (HDL) binding protein                                                                  | No Class |
| 1450924_at   | Hdgfrp3                          | hepatoma-derived growth factor, related protein 3                                                               | No Class |
| 1423252_at   | Hdgfrp3                          | hepatoma-derived growth factor, related protein 3                                                               | No Class |
| 1438912_at   | Hdgfrp2                          | hepatoma-derived growth factor, related protein 2                                                               | No Class |
| 1428823_at   | Hddc2                            | HD domain containing 2                                                                                          | No Class |
| 1454713_s_at | Hdc                              | histidine decarboxylase                                                                                         | No Class |
| 1428617_at   | Hcfc2                            | host cell factor C2                                                                                             | No Class |
| 1428406_s_at | Hcfc1r1                          | host cell factor C1 regulator 1 (XPO1-dependent)                                                                | No Class |
| 1450439_at   | Hcfc1                            | host cell factor C1                                                                                             | No Class |
| 1421972_s_at | Hcfc1                            | host cell factor C1                                                                                             | No Class |
| 1453604_a_at | Hbs1l                            | Hbs1-like (S. cerevisiae)                                                                                       | No Class |
| 1438430_at   | Hbp1                             | high mobility group box transcription factor 1                                                                  | No Class |
| 1432143_a_at | Hbp1                             | high mobility group box transcription factor 1                                                                  | No Class |
| 1417184_s_at | Hbb-b1 /// Hbb-b2                | hemoglobin, beta adult major chain /// hemoglobin, beta adult minor chain                                       | No Class |
| 1452757_s_at | Hba-a1 /// Hba-a2                | hemoglobin alpha, adult chain 1 /// hemoglobin alpha, adult chain 2                                             | No Class |
| 1428361_x_at | Hba-a1 /// Hba-a2                | hemoglobin alpha, adult chain 1 /// hemoglobin alpha, adult chain 2                                             | No Class |
| 1424277_at   | Haus7 /// LOC100044098           | HAUS augmin-like complex, subunit 7 /// similar to UCH37-interacting protein 1                                  | No Class |
| 1423919_at   | Haus3                            | HAUS augmin-like complex, subunit 3                                                                             | No Class |
| 1432511_s_at | Haus2                            | HAUS augmin-like complex, subunit 2                                                                             | No Class |
| 1424955_at   | Haus1                            | HAUS augmin-like complex, subunit 1                                                                             | No Class |
| 1438510_a_at | Hars                             | histidyl-tRNA synthetase                                                                                        | No Class |
| 1438020_at   | Hapln1                           | hyaluronan and proteoglycan link protein 1                                                                      | No Class |
| 1429958_x_at | Haghl                            | hydroxyacylglutathione hydrolase-like                                                                           | No Class |
| 1428630_x_at | Haghl                            | hydroxyacylglutathione hydrolase-like                                                                           | No Class |
| 1428584_a_at | Haghl                            | hydroxyacylglutathione hydrolase-like                                                                           | No Class |
| 1437519_x_at | Hagh /// LOC100044022            | hydroxyacyl glutathione hydrolase /// similar to Hydroxyacyl glutathione hydrolase                              | No Class |
| 1424172_at   | Hagh                             | hydroxyacyl glutathione hydrolase                                                                               | No Class |
| 1424171_a_at | Hagh                             | hydroxyacyl glutathione hydrolase                                                                               | No Class |
| 1437172_x_at | Hadhb                            | hydroxyacyl-Coenzyme A dehydrogenase/3-ketoacyl-Coenzyme A thiolase/enoyl-Coenzyme A hydratase (t               | No Class |
| 1452173_at   | Hadha                            | hydroxyacyl-Coenzyme A dehydrogenase/3-ketoacyl-Coenzyme A thiolase/enoyl-Coenzyme A hydratase (t               | No Class |
| 1430869_a_at | Habp4                            | hyaluronic acid binding protein 4                                                                               | No Class |
| 1457769_at   | H60a                             | histocompatibility 60a                                                                                          | No Class |
| 1440145_at   | H60a                             | Histocompatibility 60a                                                                                          | No Class |
| 1452095_a_at | H47                              | histocompatibility 47                                                                                           | No Class |
| 1418536_at   | H2-Q7                            | histocompatibility 2, Q region locus 7                                                                          | No Class |
| 1431008_at   | H2-Q6 /// LOC68395               | histocompatibility 2, Q region locus 6 /// histocompatibility 2, Q region locus 6-like                          | No Class |
| 1451931_x_at | H2-L                             | histocompatibility 2, D region                                                                                  | No Class |
| 1451593_at   | H2-K1                            | Histocompatibility 2, K1, K region                                                                              | No Class |
| 1427746_x_at | H2-K1                            | histocompatibility 2, K1, K region                                                                              | No Class |
| 1425336_x_at | H2-K1                            | histocompatibility 2, K1, K region                                                                              | No Class |
| 1451644_a_at | H2-gs10 /// H2-Q6 /// LOC68395   | MHC class I like protein GS10 /// histocompatibility 2, Q region locus 6 /// histocompatibility 2, Q region lo  | No Class |
| 1440907_at   | H2-Eb2                           | histocompatibility 2, class II antigen E beta2                                                                  | No Class |
| 1427651_x_at | H2-D1 /// H2-L /// LOC636948     | histocompatibility 2, D region locus 1 /// histocompatibility 2, D region /// similar to H-2 class I histocompa | No Class |
| 1424948_x_at | H2-D1 /// H2-K1 /// LOC100044874 | histocompatibility 2, D region locus 1 /// histocompatibility 2, K1, K region /// similar to H-2K(d) antigen    | No Class |
| 1452544_x_at | H2-D1                            | histocompatibility 2, D region locus 1                                                                          | No Class |
| 1451934_at   | H2-D1                            | histocompatibility 2, D region locus 1                                                                          | No Class |
| 1451784_x_at | H2-D1                            | histocompatibility 2, D region locus 1                                                                          | No Class |
| 1451683_x_at | H2-D1                            | histocompatibility 2, D region locus 1                                                                          | No Class |

|              |                        |                                                                                      |          |
|--------------|------------------------|--------------------------------------------------------------------------------------|----------|
| 1426324_at   | H2-D1                  | histocompatibility 2, D region locus 1                                               | No Class |
| 1425614_x_at | H2-D1                  | histocompatibility 2, D region locus 1                                               | No Class |
| 1425545_x_at | H2-D1                  | histocompatibility 2, D region locus 1                                               | No Class |
| 1438092_x_at | H2afz                  | H2A histone family, member Z                                                         | No Class |
| 1426363_x_at | H2afy2                 | H2A histone family, member Y2                                                        | No Class |
| 1416746_at   | H2afx                  | H2A histone family, member X                                                         | No Class |
| 1450171_x_at | Gzme                   | granzyme E                                                                           | No Class |
| 1421227_at   | Gzmd /// Gzme          | granzyme D /// granzyme E                                                            | No Class |
| 1417898_a_at | Gzma                   | granzyme A                                                                           | No Class |
| 1450196_s_at | Gys1                   | glycogen synthase 1, muscle                                                          | No Class |
| 1459522_s_at | Gyg                    | glycogenin                                                                           | No Class |
| 1448429_at   | Gyg                    | glycogenin                                                                           | No Class |
| 1450873_at   | Gtpbp4                 | GTP binding protein 4                                                                | No Class |
| 1423143_at   | Gtpbp4                 | GTP binding protein 4                                                                | No Class |
| 1423142_a_at | Gtpbp4                 | GTP binding protein 4                                                                | No Class |
| 1442305_at   | Gtpbp2                 | GTP binding protein 2                                                                | No Class |
| 1450022_at   | Gtpbp1                 | GTP binding protein 1                                                                | No Class |
| 1427027_a_at | Gtf3a                  | general transcription factor III A                                                   | No Class |
| 1431675_a_at | Gtf2i /// LOC100044121 | general transcription factor II I /// similar to transcription factor TFII-I-gamma   | No Class |
| 1460279_a_at | Gtf2i                  | general transcription factor II I                                                    | No Class |
| 1431676_x_at | Gtf2i                  | general transcription factor II I                                                    | No Class |
| 1428906_at   | Gtf2h5                 | general transcription factor IIH, polypeptide 5                                      | No Class |
| 1437163_x_at | Gtf2h4                 | general transcription factor II H, polypeptide 4                                     | No Class |
| 1426626_at   | Gtf2f2                 | general transcription factor IIF, polypeptide 2                                      | No Class |
| 1454631_at   | Gtf2a1                 | general transcription factor II A, 1                                                 | No Class |
| 1446409_at   | Gtdc1                  | glycosyltransferase-like domain containing 1                                         | No Class |
| 1456036_x_at | Gsto1                  | glutathione S-transferase omega 1                                                    | No Class |
| 1416531_at   | Gsto1                  | glutathione S-transferase omega 1                                                    | No Class |
| 1427474_s_at | Gstm3                  | glutathione S-transferase, mu 3                                                      | No Class |
| 1427473_at   | Gstm3                  | glutathione S-transferase, mu 3                                                      | No Class |
| 1448330_at   | Gstm1                  | glutathione S-transferase, mu 1                                                      | No Class |
| 1425627_x_at | Gstm1                  | glutathione S-transferase, mu 1                                                      | No Class |
| 1425626_at   | Gstm1                  | glutathione S-transferase, mu 1                                                      | No Class |
| 1416416_x_at | Gstm1                  | glutathione S-transferase, mu 1                                                      | No Class |
| 1429395_at   | Gstcd                  | glutathione S-transferase, C-terminal domain containing                              | No Class |
| 1421041_s_at | Gsta1 /// Gsta2        | glutathione S-transferase, alpha 1 (Ya) /// glutathione S-transferase, alpha 2 (Yc2) | No Class |
| 1455173_at   | Gspt1                  | G1 to S phase transition 1                                                           | No Class |
| 1426737_at   | Gspt1                  | G1 to S phase transition 1                                                           | No Class |
| 1456569_x_at | Gsn                    | gelsolin                                                                             | No Class |
| 1456312_x_at | Gsn                    | gelsolin                                                                             | No Class |
| 1437171_x_at | Gsn                    | gelsolin                                                                             | No Class |
| 1436991_x_at | Gsn                    | gelsolin                                                                             | No Class |
| 1415812_at   | Gsn                    | gelsolin                                                                             | No Class |
| 1439949_at   | Gsk3b                  | Glycogen synthase kinase 3 beta                                                      | No Class |
| 1454212_x_at | Gsdmcl2                | gasdermin C-like 2                                                                   | No Class |
| 1419591_at   | Gsdmc                  | gasdermin C                                                                          | No Class |
| 1432141_x_at | Gsdma2                 | gasdermin A2                                                                         | No Class |
| 1432140_at   | Gsdma2                 | gasdermin A2                                                                         | No Class |
| 1455841_s_at | Grwd1                  | glutamate-rich WD repeat containing 1                                                | No Class |
| 1436887_x_at | Grwd1                  | glutamate-rich WD repeat containing 1                                                | No Class |
| 1439150_x_at | Grtp1                  | GH regulated TBC protein 1                                                           | No Class |
| 1424525_at   | Grp                    | gastrin releasing peptide                                                            | No Class |
| 1456567_x_at | Grn                    | granulin                                                                             | No Class |
| 1438629_x_at | Grn                    | granulin                                                                             | No Class |
| 1449245_at   | Grin2c                 | glutamate receptor, ionotropic, NMDA2C (epsilon 3)                                   | No Class |
| 1457003_at   | Grin2b                 | glutamate receptor, ionotropic, NMDA2B (epsilon 2)                                   | No Class |
| 1434728_at   | Gria3                  | glutamate receptor, ionotropic, AMPA3 (alpha 3)                                      | No Class |

|              |                        |                                                                                                                            |          |
|--------------|------------------------|----------------------------------------------------------------------------------------------------------------------------|----------|
| 1420563_at   | Gria3                  | glutamate receptor, ionotropic, AMPA3 (alpha 3)                                                                            | No Class |
| 1448972_at   | Gria1 /// LOC100044431 | glutamate receptor, ionotropic, AMPA1 (alpha 1) /// similar to Glutamate receptor, ionotropic, AMPA1 (alpha 1)             | No Class |
| 1435239_at   | Gria1                  | glutamate receptor, ionotropic, AMPA1 (alpha 1)                                                                            | No Class |
| 1418492_at   | Grem2                  | gremlin 2 homolog, cysteine knot superfamily (Xenopus laevis)                                                              | No Class |
| 1442703_at   | Greb1l                 | growth regulation by estrogen in breast cancer-like                                                                        | No Class |
| 1425458_a_at | Grb10                  | growth factor receptor bound protein 10                                                                                    | No Class |
| 1425457_a_at | Grb10                  | growth factor receptor bound protein 10                                                                                    | No Class |
| 1456432_at   | Grap2                  | GRB2-related adaptor protein 2                                                                                             | No Class |
| 1434725_at   | Gramd1c                | GRAM domain containing 1C                                                                                                  | No Class |
| 1449279_at   | Gpx2                   | glutathione peroxidase 2                                                                                                   | No Class |
| 1455007_s_at | Gpt2                   | glutamic pyruvate transaminase (alanine aminotransferase) 2                                                                | No Class |
| 1439029_at   | Gpt2                   | glutamic pyruvate transaminase (alanine aminotransferase) 2                                                                | No Class |
| 1438385_s_at | Gpt2                   | glutamic pyruvate transaminase (alanine aminotransferase) 2                                                                | No Class |
| 1434542_at   | Gpt2                   | glutamic pyruvate transaminase (alanine aminotransferase) 2                                                                | No Class |
| 1424137_at   | Gprin1                 | G protein-regulated inducer of neurite outgrowth 1                                                                         | No Class |
| 1424450_at   | Gprc5c                 | G protein-coupled receptor, family C, group 5, member C                                                                    | No Class |
| 1449175_at   | Gpr65                  | G-protein coupled receptor 65                                                                                              | No Class |
| 1436972_at   | Gpr61                  | G protein-coupled receptor 61                                                                                              | No Class |
| 1440021_at   | Gpr20                  | G protein-coupled receptor 20                                                                                              | No Class |
| 1418554_at   | Gpr182                 | G protein-coupled receptor 182                                                                                             | No Class |
| 1447792_x_at | Gpr174                 | G protein-coupled receptor 174                                                                                             | No Class |
| 1438439_at   | Gpr171                 | G protein-coupled receptor 171                                                                                             | No Class |
| 1459274_at   | Gpr135                 | G protein-coupled receptor 135                                                                                             | No Class |
| 1460094_at   | Gpr107                 | G protein-coupled receptor 107                                                                                             | No Class |
| 1417390_at   | Gpn1                   | GPN-loop GTPase 1                                                                                                          | No Class |
| 1428250_at   | Gper                   | G protein-coupled estrogen receptor 1                                                                                      | No Class |
| 1458701_at   | Gpcpd1                 | glycerophosphocholine phosphodiesterase GDE1 homolog (S. cerevisiae)                                                       | No Class |
| 1437417_s_at | Gpc6                   | glypican 6                                                                                                                 | No Class |
| 1417389_at   | Gpc1                   | glypican 1                                                                                                                 | No Class |
| 1449390_at   | Gpatch4                | G patch domain containing 4                                                                                                | No Class |
| 1419205_x_at | Gpatch4                | G patch domain containing 4                                                                                                | No Class |
| 1422817_at   | Gp5                    | glycoprotein 5 (platelet)                                                                                                  | No Class |
| 1420394_s_at | Gp49a /// Lilrb4       | glycoprotein 49 A /// leukocyte immunoglobulin-like receptor, subfamily B, member 4                                        | No Class |
| 1417716_at   | Got2                   | glutamate oxaloacetate transaminase 2, mitochondrial                                                                       | No Class |
| 1417715_a_at | Got2                   | glutamate oxaloacetate transaminase 2, mitochondrial                                                                       | No Class |
| 1430238_at   | Got11                  | glutamic-oxaloacetic transaminase 1-like 1                                                                                 | No Class |
| 1419372_at   | Gosr2                  | golgi SNAP receptor complex member 2                                                                                       | No Class |
| 1460460_a_at | Gorasp2                | golgi reassembly stacking protein 2                                                                                        | No Class |
| 1451671_at   | Gorasp1                | golgi reassembly stacking protein 1                                                                                        | No Class |
| 1450153_at   | Gopc                   | golgi associated PDZ and coiled-coil motif containing                                                                      | No Class |
| 1421191_s_at | Gopc                   | golgi associated PDZ and coiled-coil motif containing                                                                      | No Class |
| 1450394_at   | Golph3                 | golgi phosphoprotein 3                                                                                                     | No Class |
| 1460535_at   | Golgb1                 | golgi autoantigen, golgin subfamily b, macrogolgin 1                                                                       | No Class |
| 1439546_at   | Golga7b                | golgi autoantigen, golgin subfamily a, 7B                                                                                  | No Class |
| 1417674_s_at | Golga4                 | golgi autoantigen, golgin subfamily a, 4                                                                                   | No Class |
| 1433488_x_at | Gns                    | glucosamine (N-acetyl)-6-sulfatase                                                                                         | No Class |
| 1456620_at   | Gnptab                 | N-acetylglucosamine-1-phosphate transferase, alpha and beta subunits                                                       | No Class |
| 1452461_a_at | Gnptab                 | N-acetylglucosamine-1-phosphate transferase, alpha and beta subunits                                                       | No Class |
| 1435335_a_at | Gnptab                 | N-acetylglucosamine-1-phosphate transferase, alpha and beta subunits                                                       | No Class |
| 1423157_at   | Gnpnat1                | glucosamine-phosphate N-acetyltransferase 1                                                                                | No Class |
| 1423156_at   | Gnpnat1                | glucosamine-phosphate N-acetyltransferase 1                                                                                | No Class |
| 1459225_at   | Gnl3l                  | Guanine nucleotide binding protein-like 3 (nucleolar)-like                                                                 | No Class |
| 1433656_a_at | Gnl3                   | guanine nucleotide binding protein-like 3 (nucleolar)                                                                      | No Class |
| 1437565_a_at | Gnl2 /// LOC633966     | guanine nucleotide binding protein-like 2 (nucleolar) /// similar to guanine nucleotide binding protein-like 2 (nucleolar) | No Class |
| 1426579_at   | Gnl2                   | guanine nucleotide binding protein-like 2 (nucleolar)                                                                      | No Class |
| 1457755_at   | Gng8                   | guanine nucleotide binding protein (G protein), gamma 8                                                                    | No Class |
| 1417428_at   | Gng3                   | guanine nucleotide binding protein (G protein), gamma 3                                                                    | No Class |

|              |                                       |                                                                                                                                                                                             |          |
|--------------|---------------------------------------|---------------------------------------------------------------------------------------------------------------------------------------------------------------------------------------------|----------|
| 1428157_at   | Gng2                                  | guanine nucleotide binding protein (G protein), gamma 2                                                                                                                                     | No Class |
| 1428156_at   | Gng2                                  | guanine nucleotide binding protein (G protein), gamma 2                                                                                                                                     | No Class |
| 1418452_at   | Gng2                                  | guanine nucleotide binding protein (G protein), gamma 2                                                                                                                                     | No Class |
| 1418451_at   | Gng2                                  | guanine nucleotide binding protein (G protein), gamma 2                                                                                                                                     | No Class |
| 1455583_at   | Gne                                   | glucosamine                                                                                                                                                                                 | No Class |
| 1426517_at   | Gnaz                                  | guanine nucleotide binding protein, alpha z subunit                                                                                                                                         | No Class |
| 1454959_s_at | Gnai1                                 | guanine nucleotide binding protein (G protein), alpha inhibiting 1                                                                                                                          | No Class |
| 1434440_at   | Gnai1                                 | guanine nucleotide binding protein (G protein), alpha inhibiting 1                                                                                                                          | No Class |
| 1427510_at   | Gnai1                                 | guanine nucleotide binding protein (G protein), alpha inhibiting 1                                                                                                                          | No Class |
| 1449848_at   | Gna14                                 | guanine nucleotide binding protein, alpha 14                                                                                                                                                | No Class |
| 1447791_s_at | Gna14                                 | guanine nucleotide binding protein, alpha 14                                                                                                                                                | No Class |
| 1420385_at   | Gna14                                 | guanine nucleotide binding protein, alpha 14                                                                                                                                                | No Class |
| 1460317_s_at | Gna13                                 | guanine nucleotide binding protein, alpha 13                                                                                                                                                | No Class |
| 1450656_at   | Gna13                                 | guanine nucleotide binding protein, alpha 13                                                                                                                                                | No Class |
| 1433749_at   | Gna13                                 | guanine nucleotide binding protein, alpha 13                                                                                                                                                | No Class |
| 1422555_s_at | Gna13                                 | guanine nucleotide binding protein, alpha 13                                                                                                                                                | No Class |
| 1450097_s_at | Gna12                                 | guanine nucleotide binding protein, alpha 12                                                                                                                                                | No Class |
| 1421026_at   | Gna12                                 | guanine nucleotide binding protein, alpha 12                                                                                                                                                | No Class |
| 1429180_at   | Gmpr2                                 | guanosine monophosphate reductase 2                                                                                                                                                         | No Class |
| 1448530_at   | Gmpr /// LOC100045393                 | guanosine monophosphate reductase /// similar to guanosine monophosphate reductase                                                                                                          | No Class |
| 1439030_at   | Gmppb                                 | GDP-mannose pyrophosphorylase B                                                                                                                                                             | No Class |
| 1460594_a_at | Gmppa                                 | GDP-mannose pyrophosphorylase A                                                                                                                                                             | No Class |
| 1455458_x_at | Gmppa                                 | GDP-mannose pyrophosphorylase A                                                                                                                                                             | No Class |
| 1417579_x_at | Gmppa                                 | GDP-mannose pyrophosphorylase A                                                                                                                                                             | No Class |
| 1417578_a_at | Gmppa                                 | GDP-mannose pyrophosphorylase A                                                                                                                                                             | No Class |
| 1431686_a_at | Gmfb                                  | glia maturation factor, beta                                                                                                                                                                | No Class |
| 1417069_a_at | Gmfb                                  | glia maturation factor, beta                                                                                                                                                                | No Class |
| 1429942_at   | Gmeb1                                 | glucocorticoid modulatory element binding protein 1                                                                                                                                         | No Class |
| 1438887_a_at | Gmcl1                                 | germ cell-less homolog 1 (Drosophila)                                                                                                                                                       | No Class |
| 1432598_at   | Gmcl1                                 | germ cell-less homolog 1 (Drosophila)                                                                                                                                                       | No Class |
| 1417114_at   | Gmcl1                                 | germ cell-less homolog 1 (Drosophila)                                                                                                                                                       | No Class |
| 1422225_s_at | Gm9880 /// Tcp10a /// Tcp10c          | predicted gene 9880 /// t-complex protein 10a /// t-complex protein 10c                                                                                                                     | No Class |
| 1447246_at   | Gm9873                                | predicted gene 9873                                                                                                                                                                         | No Class |
| 1431387_at   | Gm9872                                | predicted gene 9872                                                                                                                                                                         | No Class |
| 1434337_at   | Gm9853                                | Predicted gene 9853                                                                                                                                                                         | No Class |
| 1436902_x_at | Gm9844 /// Tmsb10                     | predicted gene 9844 /// thymosin, beta 10                                                                                                                                                   | No Class |
| 1437185_s_at | Gm9844 /// LOC100048142 /// Tmsb1C    | predicted gene 9844 /// similar to thymosin, beta 10 /// thymosin, beta 10                                                                                                                  | No Class |
| 1458659_at   | Gm9780 /// Plac9                      | predicted gene 9780 /// placenta specific 9                                                                                                                                                 | No Class |
| 1452590_a_at | Gm9780 /// Plac9                      | predicted gene 9780 /// placenta specific 9                                                                                                                                                 | No Class |
| 1457725_at   | Gm8369                                | Predicted gene 8369                                                                                                                                                                         | No Class |
| 1444529_at   | Gm8300                                | predicted gene 8300                                                                                                                                                                         | No Class |
| 1456032_x_at | Gm8203 /// H2afz                      | predicted gene 8203 /// H2A histone family, member Z                                                                                                                                        | No Class |
| 1448358_s_at | Gm8186 /// Snrpg                      | predicted gene 8186 /// small nuclear ribonucleoprotein polypeptide C                                                                                                                       | No Class |
| 1456584_x_at | Gm7901 /// Gm8341 /// Gm9210 /// Gm5  | 3-phosphoglycerate dehydrogenase pseudogene /// 3-phosphoglycerate dehydrogenase pseudogene /// 3-phosphoglycerate dehydrogenase pseudogene /// 3-phosphoglycerate dehydrogenase pseudogene | No Class |
| 1426657_s_at | Gm7901 /// Gm8096 /// Gm8341 /// Gm5  | 3-phosphoglycerate dehydrogenase pseudogene /// 3-phosphoglycerate dehydrogenase pseudogene /// 3-phosphoglycerate dehydrogenase pseudogene /// 3-phosphoglycerate dehydrogenase pseudogene | No Class |
| 1454714_x_at | Gm7669 /// Gm7901 /// Gm9347 /// Phg3 | 3-phosphoglycerate dehydrogenase pseudogene /// 3-phosphoglycerate dehydrogenase pseudogene /// 3-phosphoglycerate dehydrogenase pseudogene /// 3-phosphoglycerate dehydrogenase pseudogene | No Class |
| 1437621_x_at | Gm7669 /// Gm7901 /// Gm9347 /// Phg3 | 3-phosphoglycerate dehydrogenase pseudogene /// 3-phosphoglycerate dehydrogenase pseudogene /// 3-phosphoglycerate dehydrogenase pseudogene /// 3-phosphoglycerate dehydrogenase pseudogene | No Class |
| 1438768_at   | Gm7544                                | predicted gene 7544                                                                                                                                                                         | No Class |
| 1437729_at   | Gm7536                                | Predicted gene 7536                                                                                                                                                                         | No Class |
| 1439360_x_at | Gm7535 /// Ncaph2                     | predicted gene 7535 /// non-SMC condensin II complex, subunit H2                                                                                                                            | No Class |
| 1444993_at   | Gm7420                                | predicted gene 7420                                                                                                                                                                         | No Class |
| 1438091_a_at | Gm6722 /// H2afz                      | H2A histone family, member Z pseudogene /// H2A histone family, member Z                                                                                                                    | No Class |
| 1439438_a_at | Gm6563 /// Sarnp                      | SAP domain containing ribonucleoprotein pseudogene /// SAP domain containing ribonucleoprotein                                                                                              | No Class |
| 1416095_x_at | Gm6563 /// Sarnp                      | SAP domain containing ribonucleoprotein pseudogene /// SAP domain containing ribonucleoprotein                                                                                              | No Class |
| 1436930_x_at | Gm6453 /// Hmbs                       | predicted gene 6453 /// hydroxymethylbilane synthase                                                                                                                                        | No Class |
| 1458397_at   | Gm6297                                | predicted gene 6297                                                                                                                                                                         | No Class |
| 1437526_x_at | Gm6159 /// Hnrnp                      | predicted gene 6159 /// heterogeneous nuclear ribonucleoprotein R                                                                                                                           | No Class |

|              |                                                |                                                                                                                                                                                             |          |
|--------------|------------------------------------------------|---------------------------------------------------------------------------------------------------------------------------------------------------------------------------------------------|----------|
| 1428681_at   | Gm608                                          | predicted gene 608                                                                                                                                                                          | No Class |
| 1439415_x_at | Gm5963 /// Rps21                               | predicted pseudogene 5963 /// ribosomal protein S21                                                                                                                                         | No Class |
| 1452935_at   | Gm5918                                         | predicted gene 5918                                                                                                                                                                         | No Class |
| 1435715_x_at | Gm5806 /// Gm9855 /// Tdg                      | predicted gene 5806 /// predicted gene 9855 /// thymine DNA glycosylase                                                                                                                     | No Class |
| 1416790_a_at | Gm5806 /// Gm9855 /// Tdg                      | predicted gene 5806 /// predicted gene 9855 /// thymine DNA glycosylase                                                                                                                     | No Class |
| 1428038_at   | Gm568                                          | predicted gene 568                                                                                                                                                                          | No Class |
| 1445707_at   | Gm5509 /// Zdhhc6                              | predicted gene 5509 /// zinc finger, DHHC domain containing 6                                                                                                                               | No Class |
| 1416311_s_at | Gm5366 /// Tuba3a /// Tuba3b                   | predicted gene 5366 /// tubulin, alpha 3A /// tubulin, alpha 3B                                                                                                                             | No Class |
| 1438922_x_at | Gm5256 /// Gm5529 /// Slc25a5                  | predicted gene 5256 /// predicted pseudogene 5529 /// solute carrier family 25 (mitochondrial carrier, adenine nucleotide) 5                                                                | No Class |
| 1438360_x_at | Gm5256 /// Gm5529 /// Slc25a5                  | predicted gene 5256 /// predicted pseudogene 5529 /// solute carrier family 25 (mitochondrial carrier, adenine nucleotide) 5                                                                | No Class |
| 1445441_at   | Gm5142                                         | predicted gene 5142                                                                                                                                                                         | No Class |
| 1456932_at   | Gm5113                                         | predicted gene 5113                                                                                                                                                                         | No Class |
| 1446469_at   | Gm5082                                         | predicted gene 5082                                                                                                                                                                         | No Class |
| 1433903_at   | Gm5081                                         | predicted gene 5081                                                                                                                                                                         | No Class |
| 1438757_at   | Gm4636                                         | predicted gene 4636                                                                                                                                                                         | No Class |
| 1445512_at   | Gm4432                                         | predicted gene 4432                                                                                                                                                                         | No Class |
| 1437945_x_at | Gm4204 /// Nap11                               | predicted gene 4204 /// nucleosome assembly protein 1-like 1                                                                                                                                | No Class |
| 1426088_at   | Gm4076                                         | predicted gene 4076                                                                                                                                                                         | No Class |
| 1442871_at   | Gm3870                                         | predicted gene 3870                                                                                                                                                                         | No Class |
| 1420167_at   | Gm3870                                         | predicted gene 3870                                                                                                                                                                         | No Class |
| 1448232_x_at | Gm3756 /// Gm5620 /// Gm6682 /// Gm7172        | predicted gene 3756 /// predicted gene 5620 /// predicted gene 6682 /// predicted gene 7172 /// similar to Gm3756                                                                           | No Class |
| 1416128_at   | Gm3756 /// Gm5620 /// Gm6682 /// Gm7172        | predicted gene 3756 /// predicted gene 5620 /// predicted gene 6682 /// predicted gene 7172 /// similar to Gm3756                                                                           | No Class |
| 1419472_s_at | Gm3223 /// Nudc /// Nudc-ps1                   | predicted gene 3223 /// nuclear distribution gene C homolog (Aspergillus) /// nuclear distribution gene C homolog                                                                           | No Class |
| 1448241_at   | Gm2a                                           | GM2 ganglioside activator protein                                                                                                                                                           | No Class |
| 1416188_at   | Gm2a                                           | GM2 ganglioside activator protein                                                                                                                                                           | No Class |
| 1454771_at   | Gm2695 /// Gm2701                              | predicted gene 2695 /// predicted gene 2701                                                                                                                                                 | No Class |
| 1419842_at   | Gm2682                                         | predicted gene 2682                                                                                                                                                                         | No Class |
| 1440573_at   | Gm2590                                         | predicted gene 2590                                                                                                                                                                         | No Class |
| 1445801_at   | Gm2461                                         | predicted gene 2461                                                                                                                                                                         | No Class |
| 1432842_s_at | Gm2423 /// Ywhaq                               | predicted gene 2423 /// tyrosine 3-monooxygenase/tryptophan 5-monooxygenase activation protein, theta                                                                                       | No Class |
| 1456635_at   | Gm2397                                         | predicted gene 2397                                                                                                                                                                         | No Class |
| 1447416_at   | Gm239                                          | predicted gene 239                                                                                                                                                                          | No Class |
| 1459622_at   | Gm22                                           | predicted gene 22                                                                                                                                                                           | No Class |
| 1456523_at   | Gm2115                                         | predicted gene 2115                                                                                                                                                                         | No Class |
| 1442712_at   | Gm2090                                         | Predicted gene 2090                                                                                                                                                                         | No Class |
| 1446456_at   | Gm15506                                        | Predicted gene 15506                                                                                                                                                                        | No Class |
| 1415913_at   | Gm15483 /// Gm6573 /// Gm6834 /// LOC100044900 | predicted gene 15483 /// ribosomal protein S13 pseudogene /// predicted pseudogene 6834 /// similar to Gm15483                                                                              | No Class |
| 1423079_a_at | Gm15365 /// Tomm20                             | predicted gene 15365 /// translocase of outer mitochondrial membrane 20 homolog (yeast)                                                                                                     | No Class |
| 1444694_at   | Gm15234                                        | predicted gene 15234                                                                                                                                                                        | No Class |
| 1435529_at   | Gm14446                                        | predicted gene 14446                                                                                                                                                                        | No Class |
| 1422712_a_at | Gm14176 /// LOC100044900 /// Ube2              | predicted gene 14176 /// similar to Chain A, Crystal Structure Of Human Rangap1-Ubc9 /// ubiquitin-conjugating enzyme E2                                                                    | No Class |
| 1430286_s_at | Gm14057 /// Ppp1r14c                           | Ppp1r14c pseudogene /// protein phosphatase 1, regulatory (inhibitor) subunit 14c                                                                                                           | No Class |
| 1432727_at   | Gm14048 /// Psm11                              | predicted gene 14048 /// proteasome (prosome, macropain) 26S subunit, non-ATPase, 11                                                                                                        | No Class |
| 1433095_at   | Gm13872                                        | predicted gene 13872                                                                                                                                                                        | No Class |
| 1443736_at   | Gm13648                                        | predicted gene 13648                                                                                                                                                                        | No Class |
| 1456471_x_at | Gm13337 /// Gm5847 /// Gm6756 /// Gm7172       | 3-phosphoglycerate dehydrogenase pseudogene /// 3-phosphoglycerate dehydrogenase pseudogene /// 3-phosphoglycerate dehydrogenase pseudogene /// 3-phosphoglycerate dehydrogenase pseudogene | No Class |
| 1417505_s_at | Gm13305 /// Gm2002 /// Il11ra1 /// Il11r1      | predicted gene 13305 /// predicted gene 2002 /// interleukin 11 receptor, alpha chain 1 /// interleukin 11 receptor, alpha chain 1                                                          | No Class |
| 1451477_at   | Gm13139                                        | predicted gene 13139                                                                                                                                                                        | No Class |
| 1425299_s_at | Gm13072 /// Trmt112 /// Trmt112-ps             | predicted gene 13072 /// tRNA methyltransferase 11-2 homolog (S. cerevisiae) /// tRNA methyltransferase 11-2 homolog                                                                        | No Class |
| 1443601_at   | Gm12888                                        | Predicted gene 12888                                                                                                                                                                        | No Class |
| 1442020_at   | Gm12863                                        | predicted gene 12863                                                                                                                                                                        | No Class |
| 1450632_at   | Gm12844 /// Rhoa                               | predicted gene 12844 /// ras homolog gene family, member A                                                                                                                                  | No Class |
| 1435782_at   | Gm12617                                        | Uba52 pseudogene                                                                                                                                                                            | No Class |
| 1459861_s_at | Gm12397 /// Kdm2b                              | lysine (K)-specific demethylase 2B pseudogene /// lysine (K)-specific demethylase 2B                                                                                                        | No Class |
| 1438250_s_at | Gm12372 /// Taf9                               | predicted gene 12372 /// TAF9 RNA polymerase II, TATA box binding protein (TBP)-associated factor                                                                                           | No Class |
| 1456140_at   | Gm12241 /// LOC100045988 /// Zic5              | predicted gene 12241 /// similar to OPR /// zinc finger protein of the cerebellum 5                                                                                                         | No Class |
| 1458048_at   | Gm12108                                        | predicted gene 12108                                                                                                                                                                        | No Class |

|              |                                 |                                                                                                           |          |
|--------------|---------------------------------|-----------------------------------------------------------------------------------------------------------|----------|
| 1442917_at   | Gm11627                         | predicted gene 11627                                                                                      | No Class |
| 1455981_at   | Gm11263 /// Gm13654 /// Gm14138 | predicted gene 11263 /// predicted gene 13654 /// 40S ribosomal protein S6 (Phosphoprotein NP33) /// rit  | No Class |
| 1437246_x_at | Gm11263 /// Gm13654 /// Gm14138 | predicted gene 11263 /// predicted gene 13654 /// 40S ribosomal protein S6 (Phosphoprotein NP33) /// rit  | No Class |
| 1435817_x_at | Gm11263 /// Gm13654 /// Gm14138 | predicted gene 11263 /// predicted gene 13654 /// 40S ribosomal protein S6 (Phosphoprotein NP33) /// rit  | No Class |
| 1435816_at   | Gm11263 /// Gm13654 /// Gm14138 | predicted gene 11263 /// predicted gene 13654 /// 40S ribosomal protein S6 (Phosphoprotein NP33) /// rit  | No Class |
| 1427660_x_at | Gm10883 /// Gm1420 /// Gm7202   | predicted gene 10883 /// predicted gene 1420 /// predicted gene 7202 /// immunoglobulin kappa chain cc    | No Class |
| 1427455_x_at | Gm10883 /// Gm1420 /// Gm7202   | predicted gene 10883 /// predicted gene 1420 /// predicted gene 7202 /// immunoglobulin kappa chain cc    | No Class |
| 1434451_at   | Gm10786                         | predicted gene 10786                                                                                      | No Class |
| 1428296_at   | Gm10774 /// Polr2l /// Usp50    | predicted pseudogene 10774 /// polymerase (RNA) II (DNA directed) polypeptide L /// ubiquitin specific pe | No Class |
| 1436846_x_at | Gm10608 /// Gm2423 /// Ywhaq    | tyrosine 3-monooxygenase/tryptophan 5-monooxygenase activation protein, theta polypeptide pseudoge        | No Class |
| 1447260_at   | Gm10499 /// Gm8909              | predicted gene 10499 /// predicted gene 8909                                                              | No Class |
| 1422307_at   | Gm10401                         | predicted gene 10401                                                                                      | No Class |
| 1434367_s_at | Gm10333 /// Nutf2               | nuclear transport factor 2, pseudogene 1 /// nuclear transport factor 2                                   | No Class |
| 1415782_at   | Gm10241 /// Sumo2               | predicted pseudogene 10241 /// SMT3 suppressor of mif two 3 homolog 2 (yeast)                             | No Class |
| 1436822_x_at | Gm10223 /// Gm10268 /// Gm10362 | ribosomal protein L17 pseudogene /// predicted gene 10268 /// predicted gene 10362 /// predicted gene     | No Class |
| 1416485_at   | Gm10171 /// Timm23              | translocase of inner mitochondrial membrane 23 homolog pseudogene /// translocase of inner mitochondr     | No Class |
| 1434646_s_at | Gm10094 /// Sap18               | predicted gene 10094 /// Sin3-associated polypeptide 18                                                   | No Class |
| 1419445_s_at | Gm10094 /// Sap18               | predicted gene 10094 /// Sin3-associated polypeptide 18                                                   | No Class |
| 1419444_at   | Gm10094 /// Sap18               | predicted gene 10094 /// Sin3-associated polypeptide 18                                                   | No Class |
| 1439463_x_at | Gm10075 /// Gm2710 /// Gm3879   | predicted gene 10075 /// predicted gene 2710 /// predicted gene 3879 /// predicted gene 5853 /// predict  | No Class |
| 1422618_x_at | Gm10058 /// Gm10230 /// Gm10486 | predicted gene 10058 /// predicted gene 10230 /// predicted gene 10486 /// predicted gene 10488 /// pre   | No Class |
| 1422617_at   | Gm10058 /// Gm10230 /// Gm10486 | predicted gene 10058 /// predicted gene 10230 /// predicted gene 10486 /// predicted gene 10488 /// pre   | No Class |
| 1430019_a_at | Gm10052 /// Gm5643 /// Hnrnpa1  | heterogeneous nuclear ribonucleoprotein A1 pseudogene /// heterogeneous nuclear ribonucleoprotein A1      | No Class |
| 1448773_at   | Gm10036 /// Gm10288 /// Gm7589  | predicted gene 10036 /// predicted gene 10288 /// predicted gene 7589 /// ribosomal protein L1:           | No Class |
| 1448693_at   | Gltpd1                          | glycolipid transfer protein domain containing 1                                                           | No Class |
| 1440766_at   | Glt8d1                          | glycosyltransferase 8 domain containing 1                                                                 | No Class |
| 1456244_x_at | Glxr3                           | glutaredoxin 3                                                                                            | No Class |
| 1447868_x_at | Glxr3                           | glutaredoxin 3                                                                                            | No Class |
| 1417340_at   | Glxr3                           | glutaredoxin 3                                                                                            | No Class |
| 1416598_at   | Glis2                           | GLIS family zinc finger 2                                                                                 | No Class |
| 1424927_at   | Glipr1                          | GLI pathogenesis-related 1 (glioma)                                                                       | No Class |
| 1456067_at   | Gli3                            | GLI-Kruppel family member GLI3                                                                            | No Class |
| 1455154_at   | Gli3                            | GLI-Kruppel family member GLI3                                                                            | No Class |
| 1459211_at   | Gli2                            | GLI-Kruppel family member GLI2                                                                            | No Class |
| 1446086_s_at | Gli2                            | GLI-Kruppel family member GLI2                                                                            | No Class |
| 1436210_at   | Gk5                             | glycerol kinase 5 (putative)                                                                              | No Class |
| 1449094_at   | Gjc1                            | gap junction protein, gamma 1                                                                             | No Class |
| 1447787_x_at | Gjc1                            | gap junction protein, gamma 1                                                                             | No Class |
| 1422274_at   | Gja8                            | gap junction protein, alpha 8                                                                             | No Class |
| 1445037_at   | Git2                            | G protein-coupled receptor kinase-interactor 2                                                            | No Class |
| 1423391_at   | Git2                            | G protein-coupled receptor kinase-interactor 2                                                            | No Class |
| 1422763_at   | Gipc1                           | GIPC PDZ domain containing family, member 1                                                               | No Class |
| 1429149_at   | Gins3                           | GINS complex subunit 3 (Psf3 homolog)                                                                     | No Class |
| 1428713_s_at | Gins2                           | GINS complex subunit 2 (Psf2 homolog)                                                                     | No Class |
| 1457981_x_at | Gins1                           | GINS complex subunit 1 (Psf1 homolog)                                                                     | No Class |
| 1419020_at   | Gif                             | gastric intrinsic factor                                                                                  | No Class |
| 1459847_x_at | Gfra2                           | glial cell line derived neurotrophic factor family receptor alpha 2                                       | No Class |
| 1433716_x_at | Gfra2                           | glial cell line derived neurotrophic factor family receptor alpha 2                                       | No Class |
| 1425579_at   | Gfra2                           | glial cell line derived neurotrophic factor family receptor alpha 2                                       | No Class |
| 1451700_a_at | Get4                            | golgi to ER traffic protein 4 homolog (S. cerevisiae)                                                     | No Class |
| 1458373_at   | Gen1                            | Gen homolog 1, endonuclease (Drosophila)                                                                  | No Class |
| 1436654_at   | Gen1                            | Gen homolog 1, endonuclease (Drosophila)                                                                  | No Class |
| 1435764_a_at | Gemin7                          | gem (nuclear organelle) associated protein 7                                                              | No Class |
| 1455453_at   | Gemin5                          | gem (nuclear organelle) associated protein 5                                                              | No Class |
| 1436311_at   | Gemin5                          | gem (nuclear organelle) associated protein 5                                                              | No Class |
| 1419080_at   | Gdnf                            | glial cell line derived neurotrophic factor                                                               | No Class |
| 1456581_x_at | Gdi2                            | guanosine diphosphate (GDP) dissociation inhibitor 2                                                      | No Class |

|              |                                      |                                                                                                         |          |
|--------------|--------------------------------------|---------------------------------------------------------------------------------------------------------|----------|
| 1436016_x_at | Gdi2                                 | guanosine diphosphate (GDP) dissociation inhibitor 2                                                    | No Class |
| 1435898_x_at | Gdi2                                 | guanosine diphosphate (GDP) dissociation inhibitor 2                                                    | No Class |
| 1420814_at   | Gdi2                                 | guanosine diphosphate (GDP) dissociation inhibitor 2                                                    | No Class |
| 1420342_at   | Gdap10                               | ganglioside-induced differentiation-associated-protein 10                                               | No Class |
| 1455180_at   | Gcom1                                | GRINL1A complex locus                                                                                   | No Class |
| 1438660_at   | Gcnt2                                | glucosaminyl (N-acetyl) transferase 2, l-branching enzyme                                               | No Class |
| 1425503_at   | Gcnt2                                | glucosaminyl (N-acetyl) transferase 2, l-branching enzyme                                               | No Class |
| 1460431_at   | Gcnt1                                | glucosaminyl (N-acetyl) transferase 1, core 2                                                           | No Class |
| 1449538_a_at | Gcnt1                                | glucosaminyl (N-acetyl) transferase 1, core 2                                                           | No Class |
| 1425952_a_at | Gcg                                  | glucagon                                                                                                | No Class |
| 1442582_at   | Gcet2                                | germinal center expressed transcript 2                                                                  | No Class |
| 1420544_at   | Gcet2                                | germinal center expressed transcript 2                                                                  | No Class |
| 1429081_at   | Gcc2                                 | GRIP and coiled-coil domain containing 2                                                                | No Class |
| 1437044_a_at | Gba                                  | glucosidase, beta, acid                                                                                 | No Class |
| 1451589_at   | Gatsl2                               | GATS protein-like 2                                                                                     | No Class |
| 1443925_at   | Gatsl2                               | GATS protein-like 2                                                                                     | No Class |
| 1437252_at   | Gatsl2                               | GATS protein-like 2                                                                                     | No Class |
| 1447568_at   | Gatc                                 | Glutamyl-tRNA(Gln) amidotransferase, subunit C homolog (bacterial)                                      | No Class |
| 1445239_at   | Gatad2a                              | GATA zinc finger domain containing 2A                                                                   | No Class |
| 1418361_at   | Gas8                                 | growth arrest specific 8                                                                                | No Class |
| 1457270_at   | Gas7                                 | growth arrest specific 7                                                                                | No Class |
| 1455980_a_at | Gas2l3                               | growth arrest-specific 2 like 3                                                                         | No Class |
| 1453416_at   | Gas2l3                               | growth arrest-specific 2 like 3                                                                         | No Class |
| 1437244_at   | Gas2l3                               | growth arrest-specific 2 like 3                                                                         | No Class |
| 1424436_at   | Gart                                 | phosphoribosylglycinamide formyltransferase                                                             | No Class |
| 1416283_at   | Gart                                 | phosphoribosylglycinamide formyltransferase                                                             | No Class |
| 1423784_at   | Gars                                 | glycyl-tRNA synthetase                                                                                  | No Class |
| 1429454_at   | Gapvd1                               | GTPase activating protein and VPS9 domains 1                                                            | No Class |
| 1457612_at   | Gapdh /// Gm10358 /// Gm13882 /// Gm | glyceraldehyde-3-phosphate dehydrogenase /// glyceraldehyde-3-phosphate dehydrogenase pseudogene /      | No Class |
| 1423537_at   | Gap43                                | growth associated protein 43                                                                            | No Class |
| 1436385_at   | Ganc                                 | glucosidase, alpha; neutral C                                                                           | No Class |
| 1442272_at   | Galntl6                              | UDP-N-acetyl-alpha-D-galactosamine:polypeptide N-acetylgalactosaminyltransferase-like 6                 | No Class |
| 1431080_at   | Galntl6                              | UDP-N-acetyl-alpha-D-galactosamine:polypeptide N-acetylgalactosaminyltransferase-like 6                 | No Class |
| 1452232_at   | Galnt7                               | UDP-N-acetyl-alpha-D-galactosamine: polypeptide N-acetylgalactosaminyltransferase 7                     | No Class |
| 1425581_s_at | Galnt7                               | UDP-N-acetyl-alpha-D-galactosamine: polypeptide N-acetylgalactosaminyltransferase 7                     | No Class |
| 1427424_at   | Galnt6 /// LOC100047499              | UDP-N-acetyl-alpha-D-galactosamine:polypeptide N-acetylgalactosaminyltransferase 6 /// similar to UDP-N | No Class |
| 1452907_at   | Galc                                 | galactosylceramidase                                                                                    | No Class |
| 1417619_at   | Gadd45gip1                           | growth arrest and DNA-damage-inducible, gamma interacting protein 1                                     | No Class |
| 1450971_at   | Gadd45b                              | growth arrest and DNA-damage-inducible 45 beta                                                          | No Class |
| 1429685_at   | Gabbr2                               | gamma-aminobutyric acid (GABA) A receptor, subunit beta 2                                               | No Class |
| 1428203_at   | Gabbr2                               | gamma-aminobutyric acid (GABA) A receptor, subunit beta 2                                               | No Class |
| 1443942_at   | Gabpb2                               | GA repeat binding protein, beta 2                                                                       | No Class |
| 1437188_at   | Gabbr1                               | gamma-aminobutyric acid (GABA) B receptor, 1                                                            | No Class |
| 1416937_at   | Gabarap                              | gamma-aminobutyric acid receptor associated protein                                                     | No Class |
| 1439786_at   | Gab2                                 | growth factor receptor bound protein 2-associated protein 2                                             | No Class |
| 1419829_a_at | Gab2                                 | growth factor receptor bound protein 2-associated protein 2                                             | No Class |
| 1417694_at   | Gab1                                 | growth factor receptor bound protein 2-associated protein 1                                             | No Class |
| 1417693_a_at | Gab1                                 | growth factor receptor bound protein 2-associated protein 1                                             | No Class |
| 1436849_x_at | Gaa                                  | glucosidase, alpha, acid                                                                                | No Class |
| 1419428_a_at | Gaa                                  | glucosidase, alpha, acid                                                                                | No Class |
| 1448354_at   | G6pdx                                | glucose-6-phosphate dehydrogenase X-linked                                                              | No Class |
| 1422327_s_at | G6pd2 /// G6pdx                      | glucose-6-phosphate dehydrogenase 2 /// glucose-6-phosphate dehydrogenase X-linked                      | No Class |
| 1422801_at   | G3bp1                                | Ras-GTPase-activating protein SH3-domain binding protein 1                                              | No Class |
| 1455355_at   | G2e3                                 | G2/M-phase specific E3 ubiquitin ligase                                                                 | No Class |
| 1458904_at   | Fzd6                                 | Frizzled homolog 6 (Drosophila)                                                                         | No Class |
| 1448662_at   | Fzd6                                 | frizzled homolog 6 (Drosophila)                                                                         | No Class |
| 1417301_at   | Fzd6                                 | frizzled homolog 6 (Drosophila)                                                                         | No Class |

|              |                           |                                                                                         |          |
|--------------|---------------------------|-----------------------------------------------------------------------------------------|----------|
| 1419301_at   | Fzd4                      | frizzled homolog 4 (Drosophila)                                                         | No Class |
| 1421157_at   | Fzd3                      | frizzled homolog 3 (Drosophila)                                                         | No Class |
| 1418534_at   | Fzd2                      | frizzled homolog 2 (Drosophila)                                                         | No Class |
| 1418533_s_at | Fzd2                      | frizzled homolog 2 (Drosophila)                                                         | No Class |
| 1418532_at   | Fzd2                      | frizzled homolog 2 (Drosophila)                                                         | No Class |
| 1455689_at   | Fzd10                     | frizzled homolog 10 (Drosophila)                                                        | No Class |
| 1448765_at   | Fyn                       | Fyn proto-oncogene                                                                      | No Class |
| 1417558_at   | Fyn                       | Fyn proto-oncogene                                                                      | No Class |
| 1421374_a_at | Fxyd1                     | FXD domain-containing ion transport regulator 1                                         | No Class |
| 1417598_a_at | Fxr1                      | fragile X mental retardation gene 1, autosomal homolog                                  | No Class |
| 1427282_a_at | Fxn                       | frataxin                                                                                | No Class |
| 1450771_at   | Fut9                      | fucosyltransferase 9                                                                    | No Class |
| 1435308_at   | Fut9                      | fucosyltransferase 9                                                                    | No Class |
| 1460319_at   | Fut8                      | fucosyltransferase 8                                                                    | No Class |
| 1456367_at   | Fut8                      | fucosyltransferase 8                                                                    | No Class |
| 1443656_at   | Fut8                      | fucosyltransferase 8                                                                    | No Class |
| 1450246_at   | Fut2                      | fucosyltransferase 2                                                                    | No Class |
| 1451286_s_at | Fus                       | fusion, derived from t(12;16) malignant liposarcoma (human)                             | No Class |
| 1451285_at   | Fus                       | fusion, derived from t(12;16) malignant liposarcoma (human)                             | No Class |
| 1418518_at   | Furin                     | furin (paired basic amino acid cleaving enzyme)                                         | No Class |
| 1437986_x_at | Fuk                       | fucokinase                                                                              | No Class |
| 1437337_x_at | Fuk                       | fucokinase                                                                              | No Class |
| 1437544_at   | Fubp1                     | far upstream element (FUSE) binding protein 1                                           | No Class |
| 1433640_at   | Fubp1                     | far upstream element (FUSE) binding protein 1                                           | No Class |
| 1451082_at   | Ftsjd2                    | FtsJ methyltransferase domain containing 2                                              | No Class |
| 1423681_at   | Ftsjd2                    | FtsJ methyltransferase domain containing 2                                              | No Class |
| 1437684_at   | Ftsjd1                    | FtsJ methyltransferase domain containing 1                                              | No Class |
| 1417099_at   | Ftsj1 /// LOC100044636    | FtsJ homolog 1 (E. coli) /// similar to Ftsj homolog                                    | No Class |
| 1448223_at   | Fto                       | fat mass and obesity associated                                                         | No Class |
| 1422302_s_at | Ftl1 /// Ftl2 /// Gm10116 | ferritin light chain 1 /// ferritin light chain 2 /// ferritin light chain 1 pseudogene | No Class |
| 1448771_a_at | Fth1                      | ferritin heavy chain 1                                                                  | No Class |
| 1427021_s_at | Fth1                      | ferritin heavy chain 1                                                                  | No Class |
| 1434458_at   | Fst                       | follistatin                                                                             | No Class |
| 1421365_at   | Fst                       | follistatin                                                                             | No Class |
| 1450810_at   | Fshr                      | follicle stimulating hormone receptor                                                   | No Class |
| 1448378_at   | Fscn1                     | fascin homolog 1, actin bundling protein (Strongylocentrotus purpuratus)                | No Class |
| 1416516_at   | Fscn1                     | fascin homolog 1, actin bundling protein (Strongylocentrotus purpuratus)                | No Class |
| 1416515_at   | Fscn1                     | fascin homolog 1, actin bundling protein (Strongylocentrotus purpuratus)                | No Class |
| 1416514_a_at | Fscn1                     | fascin homolog 1, actin bundling protein (Strongylocentrotus purpuratus)                | No Class |
| 1448424_at   | Frzb                      | frizzled-related protein                                                                | No Class |
| 1416658_at   | Frzb                      | frizzled-related protein                                                                | No Class |
| 1451264_at   | Frmd6                     | FERM domain containing 6                                                                | No Class |
| 1436413_at   | Frk                       | fyn-related kinase                                                                      | No Class |
| 1439019_at   | Fras1                     | Fraser syndrome 1 homolog (human)                                                       | No Class |
| 1422350_at   | Fpr-rs3                   | formyl peptide receptor, related sequence 3                                             | No Class |
| 1422953_at   | Fpr2                      | formyl peptide receptor 2                                                               | No Class |
| 1440108_at   | Foxp2                     | forkhead box P2                                                                         | No Class |
| 1438232_at   | Foxp2                     | forkhead box P2                                                                         | No Class |
| 1438231_at   | Foxp2                     | forkhead box P2                                                                         | No Class |
| 1422014_at   | Foxp2                     | forkhead box P2                                                                         | No Class |
| 1455242_at   | Foxp1                     | forkhead box P1                                                                         | No Class |
| 1435222_at   | Foxp1                     | forkhead box P1                                                                         | No Class |
| 1421142_s_at | Foxp1                     | forkhead box P1                                                                         | No Class |
| 1421141_a_at | Foxp1                     | forkhead box P1                                                                         | No Class |
| 1421140_a_at | Foxp1                     | forkhead box P1                                                                         | No Class |
| 1456529_at   | Foxo1                     | Forkhead box O1                                                                         | No Class |
| 1425254_at   | Foxn4                     | forkhead box N4                                                                         | No Class |



|              |                        |                                                                                                  |          |
|--------------|------------------------|--------------------------------------------------------------------------------------------------|----------|
| 1448834_at   | Foxm1                  | forkhead box M1                                                                                  | No Class |
| 1448833_at   | Foxm1                  | forkhead box M1                                                                                  | No Class |
| 1417748_x_at | Foxm1                  | forkhead box M1                                                                                  | No Class |
| 1452753_at   | Foxk2                  | forkhead box K2                                                                                  | No Class |
| 1428354_at   | Foxk2                  | forkhead box K2                                                                                  | No Class |
| 1418357_at   | Foxg1                  | forkhead box G1                                                                                  | No Class |
| 1442315_at   | Foxd2                  | forkhead box D2                                                                                  | No Class |
| 1418876_at   | Foxd1                  | forkhead box D1                                                                                  | No Class |
| 1418496_at   | Foxa1                  | forkhead box A1                                                                                  | No Class |
| 1437247_at   | Fosl2 /// LOC634417    | fos-like antigen 2 /// similar to fos-like antigen 2                                             | No Class |
| 1417488_at   | Fosl1                  | fos-like antigen 1                                                                               | No Class |
| 1417487_at   | Fosl1                  | fos-like antigen 1                                                                               | No Class |
| 1431226_a_at | Fndc4                  | fibronectin type III domain containing 4                                                         | No Class |
| 1452783_at   | Fndc3b                 | fibronectin type III domain containing 3B                                                        | No Class |
| 1433833_at   | Fndc3b                 | fibronectin type III domain containing 3B                                                        | No Class |
| 1453321_at   | Fndc1                  | fibronectin type III domain containing 1                                                         | No Class |
| 1453746_at   | Fnbp1                  | formin binding protein 1                                                                         | No Class |
| 1442436_at   | Fn3k                   | fructosamine 3 kinase                                                                            | No Class |
| 1453102_at   | Flrt3                  | fibronectin leucine rich transmembrane protein 3                                                 | No Class |
| 1456874_at   | Flrt2                  | fibronectin leucine rich transmembrane protein 2                                                 | No Class |
| 1455096_at   | Flrt2                  | fibronectin leucine rich transmembrane protein 2                                                 | No Class |
| 1438702_at   | Flrt2                  | fibronectin leucine rich transmembrane protein 2                                                 | No Class |
| 1449073_at   | Flnc                   | filamin C, gamma                                                                                 | No Class |
| 1447812_x_at | Flnc                   | filamin C, gamma                                                                                 | No Class |
| 1438414_at   | Fkrp                   | Fukutin related protein                                                                          | No Class |
| 1422787_at   | Fkbp1                  | FK506 binding protein-like                                                                       | No Class |
| 1416859_at   | Fkbp3                  | FK506 binding protein 3                                                                          | No Class |
| 1416858_a_at | Fkbp3                  | FK506 binding protein 3                                                                          | No Class |
| 1456196_x_at | Fkbp1a                 | FK506 binding protein 1a                                                                         | No Class |
| 1448184_at   | Fkbp1a                 | FK506 binding protein 1a                                                                         | No Class |
| 1416036_at   | Fkbp1a                 | FK506 binding protein 1a                                                                         | No Class |
| 1459735_at   | Fkbp15                 | FK506 binding protein 15                                                                         | No Class |
| 1439974_at   | Fkbp15                 | FK506 binding protein 15                                                                         | No Class |
| 1417267_s_at | Fkbp11                 | FK506 binding protein 11                                                                         | No Class |
| 1443586_at   | Fip1l1                 | FIP1 like 1 ( <i>S. cerevisiae</i> )                                                             | No Class |
| 1438924_x_at | Fibp                   | Fibroblast growth factor (acidic) intracellular binding protein                                  | No Class |
| 1438923_at   | Fibp                   | Fibroblast growth factor (acidic) intracellular binding protein                                  | No Class |
| 1451912_a_at | Fgfr1 /// LOC100046239 | fibroblast growth factor receptor-like 1 /// similar to fibroblast growth factor receptor 5 beta | No Class |
| 1425796_a_at | Fgfr3                  | fibroblast growth factor receptor 3                                                              | No Class |
| 1427526_at   | Fgfr1op2               | FGFR1 oncogene partner 2                                                                         | No Class |
| 1438718_at   | Fgf9                   | fibroblast growth factor 9                                                                       | No Class |
| 1449826_a_at | Fgf2                   | fibroblast growth factor 2                                                                       | No Class |
| 1449545_at   | Fgf18                  | fibroblast growth factor 18                                                                      | No Class |
| 1460578_at   | Fgd5                   | FYVE, RhoGEF and PH domain containing 5                                                          | No Class |
| 1426041_a_at | Fgd4                   | FYVE, RhoGEF and PH domain containing 4                                                          | No Class |
| 1433398_at   | Fgd3                   | FYVE, RhoGEF and PH domain containing 3                                                          | No Class |
| 1419515_at   | Fgd2                   | FYVE, RhoGEF and PH domain containing 2                                                          | No Class |
| 1416865_at   | Fgd1                   | FYVE, RhoGEF and PH domain containing 1                                                          | No Class |
| 1449555_a_at | Fetub                  | fetuin beta                                                                                      | No Class |
| 1443641_at   | Fermt3                 | fermitin family homolog 3 ( <i>Drosophila</i> )                                                  | No Class |
| 1434180_at   | Fermt2                 | fermitin family homolog 2 ( <i>Drosophila</i> )                                                  | No Class |
| 1421731_a_at | Fen1                   | flap structure specific endonuclease 1                                                           | No Class |
| 1423418_at   | Fdps                   | farnesyl diphosphate synthetase                                                                  | No Class |
| 1436078_at   | Fcho1                  | FCH domain only 1                                                                                | No Class |
| 1436077_a_at | Fcho1                  | FCH domain only 1                                                                                | No Class |
| 1428575_at   | Fcho1                  | FCH domain only 1                                                                                | No Class |
| 1418340_at   | Fcer1g                 | Fc receptor, IgE, high affinity I, gamma polypeptide                                             | No Class |

|              |          |                                                |          |
|--------------|----------|------------------------------------------------|----------|
| 1451558_at   | Fbxw7    | F-box and WD-40 domain protein 7               | No Class |
| 1439693_a_at | Fbxw16   | F-box and WD-40 domain protein 16              | No Class |
| 1447294_at   | Fbxw11   | F-box and WD-40 domain protein 11              | No Class |
| 1425461_at   | Fbxw11   | F-box and WD-40 domain protein 11              | No Class |
| 1432211_a_at | Fbxo9    | f-box protein 9                                | No Class |
| 1428742_at   | Fbxo45   | F-box protein 45                               | No Class |
| 1449418_s_at | Fbxo36   | F-box protein 36                               | No Class |
| 1448747_at   | Fbxo32   | F-box protein 32                               | No Class |
| 1417522_at   | Fbxo32   | F-box protein 32                               | No Class |
| 1431864_at   | Fbxo24   | F-box protein 24                               | No Class |
| 1458511_at   | Fbrs1    | fibrosin-like 1                                | No Class |
| 1416685_s_at | Fbl      | fibrillarlin                                   | No Class |
| 1416684_at   | Fbl      | fibrillarlin                                   | No Class |
| 1457135_at   | Fat2     | FAT tumor suppressor homolog 2 (Drosophila)    | No Class |
| 1418803_a_at | Fasl     | Fas ligand (TNF superfamily, member 6)         | No Class |
| 1430986_at   | Farsb    | phenylalanyl-tRNA synthetase, beta subunit     | No Class |
| 1423709_s_at | Farsb    | phenylalanyl-tRNA synthetase, beta subunit     | No Class |
| 1423708_a_at | Farsb    | phenylalanyl-tRNA synthetase, beta subunit     | No Class |
| 1440799_s_at | Farp2    | FERM, RhoGEF and pleckstrin domain protein 2   | No Class |
| 1424583_at   | Farp2    | FERM, RhoGEF and pleckstrin domain protein 2   | No Class |
| 1455889_at   | Far2     | fatty acyl CoA reductase 2                     | No Class |
| 1435621_at   | Far2     | fatty acyl CoA reductase 2                     | No Class |
| 1453550_a_at | Far1     | fatty acyl CoA reductase 1                     | No Class |
| 1426370_at   | Far1     | fatty acyl CoA reductase 1                     | No Class |
| 1451570_a_at | Fam92a   | family with sequence similarity 92, member A   | No Class |
| 1439430_x_at | Fam83e   | family with sequence similarity 83, member E   | No Class |
| 1452300_at   | Fam82b   | family with sequence similarity 82, member B   | No Class |
| 1428196_a_at | Fam82a2  | family with sequence similarity 82, member A2  | No Class |
| 1454621_s_at | Fam73b   | family with sequence similarity 73, member B   | No Class |
| 1449714_at   | Fam73b   | family with sequence similarity 73, member B   | No Class |
| 1437228_at   | Fam71f1  | family with sequence similarity 71, member F1  | No Class |
| 1452073_at   | Fam64a   | family with sequence similarity 64, member A   | No Class |
| 1438321_x_at | Fam63a   | family with sequence similarity 63, member A   | No Class |
| 1437046_x_at | Fam63a   | family with sequence similarity 63, member A   | No Class |
| 1426656_at   | Fam63a   | family with sequence similarity 63, member A   | No Class |
| 1426655_a_at | Fam63a   | family with sequence similarity 63, member A   | No Class |
| 1453220_at   | Fam55b   | family with sequence similarity 55, member B   | No Class |
| 1432013_a_at | Fam54a   | family with sequence similarity 54, member A   | No Class |
| 1436088_at   | Fam49b   | family with sequence similarity 49, member B   | No Class |
| 1450116_at   | Fam48a   | family with sequence similarity 48, member A   | No Class |
| 1443747_at   | Fam48a   | family with sequence similarity 48, member A   | No Class |
| 1421070_at   | Fam48a   | family with sequence similarity 48, member A   | No Class |
| 1432884_at   | Fam23a   | family with sequence similarity 23, member A   | No Class |
| 1419490_at   | Fam19a5  | family with sequence similarity 19, member A5  | No Class |
| 1457806_at   | Fam196a  | Family with sequence similarity 196, member A  | No Class |
| 1446062_at   | Fam196a  | family with sequence similarity 196, member A  | No Class |
| 1447475_at   | Fam189a2 | family with sequence similarity 189, member A2 | No Class |
| 1435283_s_at | Fam189a2 | family with sequence similarity 189, member A2 | No Class |
| 1435282_at   | Fam189a2 | family with sequence similarity 189, member A2 | No Class |
| 1430460_at   | Fam188a  | family with sequence similarity 188, member A  | No Class |
| 1424652_at   | Fam176a  | family with sequence similarity 176, member A  | No Class |
| 1434273_at   | Fam174b  | family with sequence similarity 174, member B  | No Class |
| 1454723_at   | Fam172a  | family with sequence similarity 172, member A  | No Class |
| 1443701_at   | Fam171a2 | family with sequence similarity 171, member A2 | No Class |
| 1456560_at   | Fam170a  | family with sequence similarity 170, member A  | No Class |
| 1443874_at   | Fam164c  | family with sequence similarity 164, member C  | No Class |
| 1428418_s_at | Fam164a  | family with sequence similarity 164, member A  | No Class |

|              |         |                                                   |          |
|--------------|---------|---------------------------------------------------|----------|
| 1428417_at   | Fam164a | family with sequence similarity 164, member A     | No Class |
| 1428416_at   | Fam164a | family with sequence similarity 164, member A     | No Class |
| 1430977_at   | Fam159b | family with sequence similarity 159, member B     | No Class |
| 1435138_at   | Fam155a | family with sequence similarity 155, member A     | No Class |
| 1456939_at   | Fam154b | family with sequence similarity 154, member B     | No Class |
| 1439963_x_at | Fam154b | family with sequence similarity 154, member B     | No Class |
| 1453284_at   | Fam151b | family with sequence similarity 151, member B     | No Class |
| 1417443_at   | Fam151a | family with sequence similarity 151, member A     | No Class |
| 1460476_s_at | Fam13c  | family with sequence similarity 13, member C      | No Class |
| 1448557_at   | Fam13c  | family with sequence similarity 13, member C      | No Class |
| 1436761_s_at | Fam13c  | family with sequence similarity 13, member C      | No Class |
| 1429358_at   | Fam135a | family with sequence similarity 135, member A     | No Class |
| 1426279_at   | Fam133b | family with sequence similarity 133, member B     | No Class |
| 1448687_at   | Fam132a | family with sequence similarity 132, member A     | No Class |
| 1439422_a_at | Fam132a | family with sequence similarity 132, member A     | No Class |
| 1417393_a_at | Fam132a | family with sequence similarity 132, member A     | No Class |
| 1457728_at   | Fam129c | family with sequence similarity 129, member C     | No Class |
| 1426812_a_at | Fam129b | family with sequence similarity 129, member B     | No Class |
| 1455895_x_at | Fam125a | family with sequence similarity 125, member A     | No Class |
| 1437043_a_at | Fam125a | family with sequence similarity 125, member A     | No Class |
| 1424773_at   | Fam125a | family with sequence similarity 125, member A     | No Class |
| 1449275_at   | Fam119a | family with sequence similarity 119, member A     | No Class |
| 1449274_at   | Fam119a | family with sequence similarity 119, member A     | No Class |
| 1428541_at   | Fam115a | family with sequence similarity 115, member A     | No Class |
| 1428540_at   | Fam115a | family with sequence similarity 115, member A     | No Class |
| 1418879_at   | Fam110c | family with sequence similarity 110, member C     | No Class |
| 1433412_at   | Fam108b | family with sequence similarity 108, member B     | No Class |
| 1448509_at   | Fam107b | family with sequence similarity 107, member B     | No Class |
| 1416892_s_at | Fam107b | family with sequence similarity 107, member B     | No Class |
| 1435375_at   | Fam105a | family with sequence similarity 105, member A     | No Class |
| 1455033_at   | Fam102b | family with sequence similarity 102, member B     | No Class |
| 1434828_at   | Fam102b | family with sequence similarity 102, member B     | No Class |
| 1419547_at   | Fahd1   | fumarylacetoacetate hydrolase domain containing 1 | No Class |
| 1449219_at   | Fads3   | fatty acid desaturase 3                           | No Class |
| 1435910_at   | Fads3   | fatty acid desaturase 3                           | No Class |
| 1418773_at   | Fads3   | fatty acid desaturase 3                           | No Class |
| 1440444_at   | Fads1   | fatty acid desaturase 1                           | No Class |
| 1423680_at   | Fads1   | fatty acid desaturase 1                           | No Class |
| 1425809_at   | Fabp4   | fatty acid binding protein 4, adipocyte           | No Class |
| 1424155_at   | Fabp4   | fatty acid binding protein 4, adipocyte           | No Class |
| 1417408_at   | F3      | coagulation factor III                            | No Class |
| 1448931_at   | F2rl1   | coagulation factor II (thrombin) receptor-like 1  | No Class |
| 1456725_x_at | Ezr     | ezrin                                             | No Class |
| 1450850_at   | Ezr     | ezrin                                             | No Class |
| 1424127_at   | Eya2    | eyes absent 2 homolog (Drosophila)                | No Class |
| 1421339_at   | Extl3   | exostoses (multiple)-like 3                       | No Class |
| 1422539_at   | Extl2   | exostoses (multiple)-like 2                       | No Class |
| 1422538_at   | Extl2   | exostoses (multiple)-like 2                       | No Class |
| 1431502_a_at | Exosc3  | exosome component 3                               | No Class |
| 1454021_a_at | Exosc10 | exosome component 10                              | No Class |
| 1431832_x_at | Exosc10 | exosome component 10                              | No Class |
| 1423587_a_at | Exosc10 | exosome component 10                              | No Class |
| 1452012_a_at | Exosc1  | exosome component 1                               | No Class |
| 1434865_a_at | Exoc7   | exocyst complex component 7                       | No Class |
| 1454250_at   | Exoc6b  | exocyst complex component 6B                      | No Class |
| 1431062_a_at | Exoc4   | exocyst complex component 4                       | No Class |
| 1422686_s_at | Exoc4   | exocyst complex component 4                       | No Class |

|              |                 |                                                                                             |          |
|--------------|-----------------|---------------------------------------------------------------------------------------------|----------|
| 1422685_at   | Exoc4           | exocyst complex component 4                                                                 | No Class |
| 1422684_a_at | Exoc4           | exocyst complex component 4                                                                 | No Class |
| 1428470_at   | Exoc2           | exocyst complex component 2                                                                 | No Class |
| 1418026_at   | Exo1            | exonuclease 1                                                                               | No Class |
| 1417238_at   | Ewsr1           | Ewing sarcoma breakpoint region 1                                                           | No Class |
| 1458889_at   | Evl             | Ena-vasodilator stimulated phosphoprotein                                                   | No Class |
| 1440885_at   | Evl             | Ena-vasodilator stimulated phosphoprotein                                                   | No Class |
| 1426505_at   | Evi2b           | ecotropic viral integration site 2b                                                         | No Class |
| 1426506_at   | Evi2a /// Evi2b | ecotropic viral integration site 2a /// ecotropic viral integration site 2b                 | No Class |
| 1450241_a_at | Evi2a           | ecotropic viral integration site 2a                                                         | No Class |
| 1443894_at   | Evi2a           | Ecotropic viral integration site 2a                                                         | No Class |
| 1450082_s_at | Etv5            | ets variant gene 5                                                                          | No Class |
| 1428142_at   | Etv5            | ets variant gene 5                                                                          | No Class |
| 1420998_at   | Etv5            | ets variant gene 5                                                                          | No Class |
| 1423232_at   | Etv4            | ets variant gene 4 (E1A enhancer binding protein, E1AF)                                     | No Class |
| 1437809_x_at | Ets2            | E26 avian leukemia oncogene 2, 3 domain                                                     | No Class |
| 1457147_at   | Etl4            | enhancer trap locus 4                                                                       | No Class |
| 1432901_at   | Etl4            | enhancer trap locus 4                                                                       | No Class |
| 1432266_at   | Etl4            | enhancer trap locus 4                                                                       | No Class |
| 1451084_at   | Etfdh           | electron transferring flavoprotein, dehydrogenase                                           | No Class |
| 1453064_at   | Etaa1           | Ewing s tumor-associated antigen 1                                                          | No Class |
| 1433683_at   | Esrp2           | epithelial splicing regulatory protein 2                                                    | No Class |
| 1460591_at   | Esr1            | estrogen receptor 1 (alpha)                                                                 | No Class |
| 1435663_at   | Esr1            | estrogen receptor 1 (alpha)                                                                 | No Class |
| 1434942_at   | Esf1            | ESF1, nucleolar pre-rRNA processing protein, homolog (S. cerevisiae)                        | No Class |
| 1434941_s_at | Esf1            | ESF1, nucleolar pre-rRNA processing protein, homolog (S. cerevisiae)                        | No Class |
| 1417825_at   | Esd             | esterase D/formylglutathione hydrolase                                                      | No Class |
| 1428304_at   | Esco2           | establishment of cohesion 1 homolog 2 (S. cerevisiae)                                       | No Class |
| 1416913_at   | Es1             | esterase 1                                                                                  | No Class |
| 1438583_at   | Ern1            | Endoplasmic reticulum (ER) to nucleus signalling 1                                          | No Class |
| 1446228_at   | Ermp1           | endoplasmic reticulum metallopeptidase 1                                                    | No Class |
| 1440851_at   | Erlec1          | endoplasmic reticulum lectin 1                                                              | No Class |
| 1454229_a_at | Eri2            | exoribonuclease 2                                                                           | No Class |
| 1423333_at   | Ergic1          | endoplasmic reticulum-golgi intermediate compartment (ERGIC) 1                              | No Class |
| 1440244_at   | Erg             | avian erythroblastosis virus E-26 (v-ets) oncogene related                                  | No Class |
| 1425370_a_at | Erg             | avian erythroblastosis virus E-26 (v-ets) oncogene related                                  | No Class |
| 1435561_at   | Erf             | Ets2 repressor factor                                                                       | No Class |
| 1427194_a_at | Ercc8           | excision repair cross-complementing rodent repair deficiency, complementation group 8       | No Class |
| 1444024_at   | Ercc6l          | excision repair cross-complementing rodent repair deficiency complementation group 6 - like | No Class |
| 1424766_at   | Ercc6l          | excision repair cross-complementing rodent repair deficiency complementation group 6 - like | No Class |
| 1440237_at   | Ercc4           | excision repair cross-complementing rodent repair deficiency, complementation group 4       | No Class |
| 1437447_s_at | Ercc1           | excision repair cross-complementing rodent repair deficiency, complementation group 1       | No Class |
| 1417328_at   | Ercc1           | excision repair cross-complementing rodent repair deficiency, complementation group 1       | No Class |
| 1444681_at   | Erc2            | ELKS/RAB6-interacting/CAST family member 2                                                  | No Class |
| 1424247_at   | Erc1            | ELKS/RAB6-interacting/CAST family member 1                                                  | No Class |
| 1439638_at   | Erbb2ip         | Erbb2 interacting protein                                                                   | No Class |
| 1439080_at   | Erbb2ip         | Erbb2 interacting protein                                                                   | No Class |
| 1439079_a_at | Erbb2ip         | Erbb2 interacting protein                                                                   | No Class |
| 1433753_x_at | Eral1           | Era (G-protein)-like 1 (E. coli)                                                            | No Class |
| 1420520_x_at | Eral1           | Era (G-protein)-like 1 (E. coli)                                                            | No Class |
| 1420519_a_at | Eral1           | Era (G-protein)-like 1 (E. coli)                                                            | No Class |
| 1440729_at   | Eps15           | epidermal growth factor receptor pathway substrate 15                                       | No Class |
| 1419251_at   | Eps15           | epidermal growth factor receptor pathway substrate 15                                       | No Class |
| 1452158_at   | Eprs            | glutamyl-prolyl-tRNA synthetase                                                             | No Class |
| 1452157_at   | Eprs            | glutamyl-prolyl-tRNA synthetase                                                             | No Class |
| 1426713_s_at | Eprs            | glutamyl-prolyl-tRNA synthetase                                                             | No Class |
| 1424960_at   | Epn3            | epsin 3                                                                                     | No Class |

|              |                         |                                                                                                         |          |
|--------------|-------------------------|---------------------------------------------------------------------------------------------------------|----------|
| 1433915_s_at | Epn2                    | epsin 2                                                                                                 | No Class |
| 1427226_at   | Epn2                    | epsin 2                                                                                                 | No Class |
| 1427225_at   | Epn2                    | epsin 2                                                                                                 | No Class |
| 1454835_at   | Epm2aip1                | EPM2A (laforin) interacting protein 1                                                                   | No Class |
| 1425624_at   | Epm2aip1                | EPM2A (laforin) interacting protein 1                                                                   | No Class |
| 1434526_at   | Ephx4 /// LOC100046112  | epoxide hydrolase 4 /// similar to epoxide hydrolase-related                                            | No Class |
| 1439757_s_at | Epha4                   | Eph receptor A4                                                                                         | No Class |
| 1429021_at   | Epha4                   | Eph receptor A4                                                                                         | No Class |
| 1421929_at   | Epha4                   | Eph receptor A4                                                                                         | No Class |
| 1421928_at   | Epha4                   | Eph receptor A4                                                                                         | No Class |
| 1432400_at   | Epha1                   | Eph receptor A1                                                                                         | No Class |
| 1450380_at   | Epdr1                   | ependymin related protein 1 (zebrafish)                                                                 | No Class |
| 1421815_at   | Epdr1                   | ependymin related protein 1 (zebrafish)                                                                 | No Class |
| 1447899_x_at | Epcam                   | epithelial cell adhesion molecule                                                                       | No Class |
| 1445439_at   | Epb4.9                  | erythrocyte protein band 4.9                                                                            | No Class |
| 1426010_a_at | Epb4.113                | erythrocyte protein band 4.1-like 3                                                                     | No Class |
| 1419062_at   | Epb4.113                | erythrocyte protein band 4.1-like 3                                                                     | No Class |
| 1459619_at   | Epb4.112                | erythrocyte protein band 4.1-like 2                                                                     | No Class |
| 1444150_at   | Epb4.1                  | erythrocyte protein band 4.1                                                                            | No Class |
| 1447712_x_at | Ep400                   | E1A binding protein p400                                                                                | No Class |
| 1447349_s_at | Ep400                   | E1A binding protein p400                                                                                | No Class |
| 1434765_at   | Ep300                   | E1A binding protein p300                                                                                | No Class |
| 1460392_a_at | Eny2                    | enhancer of yellow 2 homolog (Drosophila)                                                               | No Class |
| 1447900_x_at | Entpd4 /// LOC100048085 | ectonucleoside triphosphate diphosphohydrolase 4 /// similar to ectonucleoside triphosphate diphosphohy | No Class |
| 1438177_x_at | Entpd4 /// LOC100048085 | ectonucleoside triphosphate diphosphohydrolase 4 /// similar to ectonucleoside triphosphate diphosphohy | No Class |
| 1453586_at   | Entpd1                  | ectonucleoside triphosphate diphosphohydrolase 1                                                        | No Class |
| 1450939_at   | Entpd1                  | ectonucleoside triphosphate diphosphohydrolase 1                                                        | No Class |
| 1423326_at   | Entpd1                  | ectonucleoside triphosphate diphosphohydrolase 1                                                        | No Class |
| 1425353_at   | Enpp3                   | ectonucleotide pyrophosphatase/phosphodiesterase 3                                                      | No Class |
| 1438317_a_at | Endog                   | endonuclease G                                                                                          | No Class |
| 1421097_at   | Endog                   | endonuclease G                                                                                          | No Class |
| 1450061_at   | Enc1                    | ectodermal-neural cortex 1                                                                              | No Class |
| 1420965_a_at | Enc1                    | ectodermal-neural cortex 1                                                                              | No Class |
| 1442223_at   | Enah                    | Enabled homolog (Drosophila)                                                                            | No Class |
| 1424801_at   | Enah                    | enabled homolog (Drosophila)                                                                            | No Class |
| 1424800_at   | Enah                    | enabled homolog (Drosophila)                                                                            | No Class |
| 1421624_a_at | Enah                    | enabled homolog (Drosophila)                                                                            | No Class |
| 1418618_at   | En1                     | engrailed 1                                                                                             | No Class |
| 1451563_at   | Emr4                    | EGF-like module containing, mucin-like, hormone receptor-like sequence 4                                | No Class |
| 1433670_at   | Emp2                    | epithelial membrane protein 2                                                                           | No Class |
| 1425273_s_at | Emp2                    | epithelial membrane protein 2                                                                           | No Class |
| 1425272_at   | Emp2                    | epithelial membrane protein 2                                                                           | No Class |
| 1436965_at   | Emilin3                 | elastin microfibril interfacier 3                                                                       | No Class |
| 1431834_a_at | Emilin1                 | elastin microfibril interfacier 1                                                                       | No Class |
| 1416414_at   | Emilin1                 | elastin microfibril interfacier 1                                                                       | No Class |
| 1435054_at   | Eme1                    | essential meiotic endonuclease 1 homolog 1 (S. pombe)                                                   | No Class |
| 1418059_at   | Elt1                    | EGF, latrophilin seven transmembrane domain containing 1                                                | No Class |
| 1437338_x_at | Elp3                    | Elongation protein 3 homolog (S. cerevisiae)                                                            | No Class |
| 1436762_x_at | Elp3                    | Elongation protein 3 homolog (S. cerevisiae)                                                            | No Class |
| 1441891_x_at | Elov17                  | ELOVL family member 7, elongation of long chain fatty acids (yeast)                                     | No Class |
| 1440354_at   | Elov17                  | ELOVL family member 7, elongation of long chain fatty acids (yeast)                                     | No Class |
| 1440312_at   | Elov17                  | ELOVL family member 7, elongation of long chain fatty acids (yeast)                                     | No Class |
| 1424098_at   | Elov17                  | ELOVL family member 7, elongation of long chain fatty acids (yeast)                                     | No Class |
| 1424097_at   | Elov17                  | ELOVL family member 7, elongation of long chain fatty acids (yeast)                                     | No Class |
| 1456530_x_at | Elov1                   | elongation of very long chain fatty acids (FEN1/Elo2, SUR4/Elo3, yeast)-like 1                          | No Class |
| 1455994_x_at | Elov1                   | elongation of very long chain fatty acids (FEN1/Elo2, SUR4/Elo3, yeast)-like 1                          | No Class |
| 1443820_x_at | Elov1                   | elongation of very long chain fatty acids (FEN1/Elo2, SUR4/Elo3, yeast)-like 1                          | No Class |

|              |                          |                                                                                                                    |          |
|--------------|--------------------------|--------------------------------------------------------------------------------------------------------------------|----------|
| 1442514_a_at | Ell3                     | elongation factor RNA polymerase II-like 3                                                                         | No Class |
| 1427162_a_at | Elk4                     | ELK4, member of ETS oncogene family                                                                                | No Class |
| 1439319_at   | Eif1                     | E74-like factor 1                                                                                                  | No Class |
| 1448151_at   | Elavl1                   | ELAV (embryonic lethal, abnormal vision, Drosophila)-like 1 (Hu antigen R)                                         | No Class |
| 1431037_a_at | Elavl1                   | ELAV (embryonic lethal, abnormal vision, Drosophila)-like 1 (Hu antigen R)                                         | No Class |
| 1428477_at   | Elac2                    | elaC homolog 2 (E. coli)                                                                                           | No Class |
| 1454663_at   | Eif5                     | eukaryotic translation initiation factor 5                                                                         | No Class |
| 1433631_at   | Eif5                     | eukaryotic translation initiation factor 5                                                                         | No Class |
| 1446145_at   | Eif4g3                   | eukaryotic translation initiation factor 4 gamma, 3                                                                | No Class |
| 1434976_x_at | Eif4ebp1                 | eukaryotic translation initiation factor 4E binding protein 1                                                      | No Class |
| 1417562_at   | Eif4ebp1                 | eukaryotic translation initiation factor 4E binding protein 1                                                      | No Class |
| 1421985_a_at | Eif4e2                   | eukaryotic translation initiation factor 4E member 2                                                               | No Class |
| 1450909_at   | Eif4e                    | eukaryotic translation initiation factor 4E                                                                        | No Class |
| 1426380_at   | Eif4b                    | eukaryotic translation initiation factor 4B                                                                        | No Class |
| 1426379_at   | Eif4b                    | eukaryotic translation initiation factor 4B                                                                        | No Class |
| 1426378_at   | Eif4b                    | eukaryotic translation initiation factor 4B                                                                        | No Class |
| 1437948_x_at | Eif3l                    | eukaryotic translation initiation factor 3, subunit L                                                              | No Class |
| 1417718_at   | Eif3g                    | eukaryotic translation initiation factor 3, subunit G                                                              | No Class |
| 1460432_a_at | Eif3e                    | eukaryotic translation initiation factor 3, subunit E                                                              | No Class |
| 1439268_x_at | Eif3e                    | eukaryotic translation initiation factor 3, subunit E                                                              | No Class |
| 1434523_x_at | Eif3e                    | eukaryotic translation initiation factor 3, subunit E                                                              | No Class |
| 1415859_at   | Eif3c                    | eukaryotic translation initiation factor 3, subunit C                                                              | No Class |
| 1416661_at   | Eif3a                    | eukaryotic translation initiation factor 3, subunit A                                                              | No Class |
| 1421895_at   | Eif2s3x /// LOC100048746 | eukaryotic translation initiation factor 2, subunit 3, structural gene X-linked /// similar to translation initiat | No Class |
| 1451090_a_at | Eif2s3x                  | eukaryotic translation initiation factor 2, subunit 3, structural gene X-linked                                    | No Class |
| 1423744_x_at | Eif2s3x                  | eukaryotic translation initiation factor 2, subunit 3, structural gene X-linked                                    | No Class |
| 1456617_a_at | Eif2s2                   | eukaryotic translation initiation factor 2, subunit 2 (beta)                                                       | No Class |
| 1417713_at   | Eif2s2                   | eukaryotic translation initiation factor 2, subunit 2 (beta)                                                       | No Class |
| 1417712_at   | Eif2s2                   | eukaryotic translation initiation factor 2, subunit 2 (beta)                                                       | No Class |
| 1452662_a_at | Eif2s1                   | eukaryotic translation initiation factor 2, subunit 1 alpha                                                        | No Class |
| 1426366_at   | Eif2c2                   | eukaryotic translation initiation factor 2C, 2                                                                     | No Class |
| 1437071_at   | Eif1ax                   | eukaryotic translation initiation factor 1A, X-linked                                                              | No Class |
| 1419736_a_at | Eif1ax                   | eukaryotic translation initiation factor 1A, X-linked                                                              | No Class |
| 1424343_a_at | Eif1a                    | eukaryotic translation initiation factor 1A                                                                        | No Class |
| 1426888_at   | Ehmt2                    | euchromatic histone lysine N-methyltransferase 2                                                                   | No Class |
| 1459823_at   | Ehd2                     | EH-domain containing 2                                                                                             | No Class |
| 1435785_at   | Ehd2                     | EH-domain containing 2                                                                                             | No Class |
| 1427729_at   | Ehd2                     | EH-domain containing 2                                                                                             | No Class |
| 1424158_at   | Ehd2                     | EH-domain containing 2                                                                                             | No Class |
| 1424157_at   | Ehd2                     | EH-domain containing 2                                                                                             | No Class |
| 1416012_at   | Ehd1                     | EH-domain containing 1                                                                                             | No Class |
| 1416011_x_at | Ehd1                     | EH-domain containing 1                                                                                             | No Class |
| 1416010_a_at | Ehd1                     | EH-domain containing 1                                                                                             | No Class |
| 1451530_at   | Egfr                     | epidermal growth factor receptor                                                                                   | No Class |
| 1435888_at   | Egfr                     | epidermal growth factor receptor                                                                                   | No Class |
| 1424932_at   | Egfr                     | epidermal growth factor receptor                                                                                   | No Class |
| 1425999_at   | EG214403                 | predicted gene, EG214403                                                                                           | No Class |
| 1416132_at   | Efr3a                    | EFR3 homolog A (S. cerevisiae)                                                                                     | No Class |
| 1418285_at   | Efnb1                    | ephrin B1                                                                                                          | No Class |
| 1436866_at   | Efna5                    | ephrin A5                                                                                                          | No Class |
| 1427183_at   | Efemp1                   | epidermal growth factor-containing fibulin-like extracellular matrix protein 1                                     | No Class |
| 1449013_at   | Eef2k                    | eukaryotic elongation factor-2 kinase                                                                              | No Class |
| 1437829_s_at | Eef2k                    | eukaryotic elongation factor-2 kinase                                                                              | No Class |
| 1417364_at   | Eef1g /// LOC100047986   | eukaryotic translation elongation factor 1 gamma /// similar to eukaryotic translation elongation factor 1 g       | No Class |
| 1449044_at   | Eef1e1                   | eukaryotic translation elongation factor 1 epsilon 1                                                               | No Class |
| 1449506_a_at | Eef1d                    | eukaryotic translation elongation factor 1 delta (guanine nucleotide exchange protein)                             | No Class |
| 1448653_at   | Eed                      | embryonic ectoderm development                                                                                     | No Class |

|              |                        |                                                                                                                  |          |
|--------------|------------------------|------------------------------------------------------------------------------------------------------------------|----------|
| 1441924_x_at | Edn3                   | endothelin 3                                                                                                     | No Class |
| 1449161_at   | Edn2                   | endothelin 2                                                                                                     | No Class |
| 1440152_x_at | Edf1 /// Gm11964       | endothelial differentiation-related factor 1 /// predicted gene 11964                                            | No Class |
| 1448266_at   | Edf1                   | endothelial differentiation-related factor 1                                                                     | No Class |
| 1440151_s_at | Edf1                   | endothelial differentiation-related factor 1                                                                     | No Class |
| 1423695_at   | Edem2                  | ER degradation enhancer, mannosidase alpha-like 2                                                                | No Class |
| 1419513_a_at | Ect2                   | ect2 oncogene                                                                                                    | No Class |
| 1455741_a_at | Ece1                   | endothelin converting enzyme 1                                                                                   | No Class |
| 1441423_at   | Ece1                   | endothelin converting enzyme 1                                                                                   | No Class |
| 1434177_at   | Ece1                   | endothelin converting enzyme 1                                                                                   | No Class |
| 1460666_a_at | Ebf3                   | early B-cell factor 3                                                                                            | No Class |
| 1452751_at   | Ebf3                   | early B-cell factor 3                                                                                            | No Class |
| 1428349_s_at | Ebf3                   | early B-cell factor 3                                                                                            | No Class |
| 1448293_at   | Ebf1                   | early B-cell factor 1                                                                                            | No Class |
| 1439789_at   | Ebf1                   | early B-cell factor 1                                                                                            | No Class |
| 1416302_at   | Ebf1                   | early B-cell factor 1                                                                                            | No Class |
| 1416301_a_at | Ebf1                   | early B-cell factor 1                                                                                            | No Class |
| 1450616_at   | Ear5                   | eosinophil-associated, ribonuclease A family, member 5                                                           | No Class |
| 1434132_at   | E430025E21Rik          | RIKEN cDNA E430025E21 gene                                                                                       | No Class |
| 1448039_at   | E430024I08Rik          | RIKEN cDNA E430024I08 gene                                                                                       | No Class |
| 1441970_at   | E430010N07Rik          | RIKEN cDNA E430010N07 gene                                                                                       | No Class |
| 1444319_at   | E2f8                   | E2F transcription factor 8                                                                                       | No Class |
| 1436186_at   | E2f8                   | E2F transcription factor 8                                                                                       | No Class |
| 1451480_at   | E2f4                   | E2F transcription factor 4                                                                                       | No Class |
| 1443752_at   | E230008N13Rik          | RIKEN cDNA E230008N13 gene                                                                                       | No Class |
| 1433797_at   | E130309D02Rik          | RIKEN cDNA E130309D02 gene                                                                                       | No Class |
| 1436692_at   | E130308A19Rik          | RIKEN cDNA E130308A19 gene                                                                                       | No Class |
| 1434981_at   | E130303B06Rik          | RIKEN cDNA E130303B06 gene                                                                                       | No Class |
| 1432841_at   | E130116L18Rik          | RIKEN cDNA E130116L18 gene                                                                                       | No Class |
| 1454170_at   | E130101E03Rik          | RIKEN cDNA E130101E03 gene                                                                                       | No Class |
| 1432166_at   | E130018N17Rik          | RIKEN cDNA E130018N17 gene                                                                                       | No Class |
| 1441355_at   | E030047P09Rik          | RIKEN cDNA E030047P09 gene                                                                                       | No Class |
| 1430386_at   | E030024N20Rik          | peptidylprolyl isomerase A pseudogene 8                                                                          | No Class |
| 1436354_at   | Dzip1l                 | DAZ interacting protein 1-like                                                                                   | No Class |
| 1428469_a_at | Dzip1                  | DAZ interacting protein 1                                                                                        | No Class |
| 1428637_at   | Dyrk2 /// LOC100044376 | dual-specificity tyrosine-(Y)-phosphorylation regulated kinase 2 /// similar to Dual-specificity tyrosine-(Y)-pl | No Class |
| 1426226_at   | Dyrk1a                 | dual-specificity tyrosine-(Y)-phosphorylation regulated kinase 1a                                                | No Class |
| 1449929_at   | Dynlt3                 | dynein light chain Tctex-type 3                                                                                  | No Class |
| 1449928_at   | Dynlt3                 | dynein light chain Tctex-type 3                                                                                  | No Class |
| 1420614_at   | Dynlt3                 | dynein light chain Tctex-type 3                                                                                  | No Class |
| 1456125_a_at | Dynll1 /// Gm6788      | dynein light chain LC8-type 1 /// predicted gene 6788                                                            | No Class |
| 1417339_a_at | Dynll1 /// Gm6788      | dynein light chain LC8-type 1 /// predicted gene 6788                                                            | No Class |
| 1448682_at   | Dynll1                 | dynein light chain LC8-type 1                                                                                    | No Class |
| 1453400_at   | Dydc2                  | DPY30 domain containing 2                                                                                        | No Class |
| 1445470_at   | Dvwa                   | dual von Willebrand factor A domains                                                                             | No Class |
| 1448616_at   | Dvl2                   | dishevelled 2, dsh homolog (Drosophila)                                                                          | No Class |
| 1456769_at   | Dusp3                  | dual specificity phosphatase 3 (vaccinia virus phosphatase VH1-related)                                          | No Class |
| 1425608_at   | Dusp3                  | dual specificity phosphatase 3 (vaccinia virus phosphatase VH1-related)                                          | No Class |
| 1450698_at   | Dusp2                  | dual specificity phosphatase 2                                                                                   | No Class |
| 1431422_a_at | Dusp14                 | dual specificity phosphatase 14                                                                                  | No Class |
| 1453252_at   | Dus4l                  | dihydrouridine synthase 4-like (S. cerevisiae)                                                                   | No Class |
| 1441006_at   | Dus4l                  | dihydrouridine synthase 4-like (S. cerevisiae)                                                                   | No Class |
| 1435734_x_at | Dus1l                  | dihydrouridine synthase 1-like (S. cerevisiae)                                                                   | No Class |
| 1423943_at   | Dus1l                  | dihydrouridine synthase 1-like (S. cerevisiae)                                                                   | No Class |
| 1438096_a_at | Dtymk                  | deoxythymidylate kinase                                                                                          | No Class |
| 1439825_at   | Dtx3l                  | deltex 3-like (Drosophila)                                                                                       | No Class |
| 1435208_at   | Dtx3l                  | deltex 3-like (Drosophila)                                                                                       | No Class |

|              |                        |                                                                   |          |
|--------------|------------------------|-------------------------------------------------------------------|----------|
| 1437651_a_at | Dtnb                   | dystrobrevin, beta                                                | No Class |
| 1456652_at   | Dtl                    | denticleless homolog (Drosophila)                                 | No Class |
| 1453753_at   | Dtl                    | denticleless homolog (Drosophila)                                 | No Class |
| 1439520_at   | Dtl                    | denticleless homolog (Drosophila)                                 | No Class |
| 1430228_at   | Dtl                    | denticleless homolog (Drosophila)                                 | No Class |
| 1417124_at   | Dstn                   | destrin                                                           | No Class |
| 1422246_at   | Dspp                   | dentin sialophosphoprotein                                        | No Class |
| 1417139_at   | Dsn1                   | DSN1, MIND kinetochore complex component, homolog (S. cerevisiae) | No Class |
| 1460380_at   | Dsg2                   | desmoglein 2                                                      | No Class |
| 1425619_s_at | Dsg2                   | desmoglein 2                                                      | No Class |
| 1427734_a_at | Dscam11                | Down syndrome cell adhesion molecule-like 1                       | No Class |
| 1417692_at   | Drg2                   | developmentally regulated GTP binding protein 2                   | No Class |
| 1418950_at   | Drd2                   | dopamine receptor 2                                               | No Class |
| 1451676_at   | Drap1                  | Dr1 associated protein 1 (negative cofactor 2 alpha)              | No Class |
| 1453731_a_at | Dram2                  | VDNA-damage regulated autophagy modulator 2                       | No Class |
| 1445545_at   | Dram2                  | VDNA-damage regulated autophagy modulator 2                       | No Class |
| 1424782_at   | Dram2                  | VDNA-damage regulated autophagy modulator 2                       | No Class |
| 1416019_at   | Dr1                    | down-regulator of transcription 1                                 | No Class |
| 1437858_at   | Dpy19l3                | dpy-19-like 3 (C. elegans)                                        | No Class |
| 1418511_at   | Dpt                    | dermatopontin                                                     | No Class |
| 1424295_at   | Dppa3                  | developmental pluripotency-associated 3                           | No Class |
| 1436087_at   | Dpp10 /// LOC100047231 | dipeptidylpeptidase 10 /// similar to Dipeptidylpeptidase 1C      | No Class |
| 1439049_at   | Dph5                   | DPH5 homolog (S. cerevisiae)                                      | No Class |
| 1433921_s_at | Dph3                   | DPH3 homolog (KT111, S. cerevisiae)                               | No Class |
| 1420530_at   | Dpf1                   | D4, zinc and double PHD fingers family 1                          | No Class |
| 1442869_at   | Dok7                   | docking protein 7                                                 | No Class |
| 1418096_at   | Dok3                   | docking protein 3                                                 | No Class |
| 1438334_at   | Dock2                  | Dedicator of cyto-kinesis 2                                       | No Class |
| 1422808_s_at | Dock2                  | dedicator of cyto-kinesis 2                                       | No Class |
| 1443467_at   | Dock11                 | dedicator of cytokinesis 11                                       | No Class |
| 1429028_at   | Dock11                 | dedicator of cytokinesis 11                                       | No Class |
| 1435343_at   | Dock10                 | dedicator of cytokinesis 10                                       | No Class |
| 1443991_at   | Dock1                  | dedicator of cytokinesis 1                                        | No Class |
| 1427881_at   | Dnttip2                | deoxynucleotidyltransferase, terminal, interacting protein 2      | No Class |
| 1456985_at   | Dnttip1                | deoxynucleotidyltransferase, terminal, interacting protein 1      | No Class |
| 1439452_x_at | Dnpep                  | aspartyl aminopeptidase                                           | No Class |
| 1438557_x_at | Dnpep                  | aspartyl aminopeptidase                                           | No Class |
| 1437437_x_at | Dnpep                  | aspartyl aminopeptidase                                           | No Class |
| 1449052_a_at | Dnmt3b                 | DNA methyltransferase 3B                                          | No Class |
| 1418351_a_at | Dnmt3b                 | DNA methyltransferase 3B                                          | No Class |
| 1447877_x_at | Dnmt1                  | DNA methyltransferase (cytosine-5) 1                              | No Class |
| 1435122_x_at | Dnmt1                  | DNA methyltransferase (cytosine-5) 1                              | No Class |
| 1422946_a_at | Dnmt1                  | DNA methyltransferase (cytosine-5) 1                              | No Class |
| 1452382_at   | Dnm3os                 | dynamamin 3, opposite strand                                      | No Class |
| 1425136_x_at | Dnm2                   | dynamamin 2                                                       | No Class |
| 1425135_a_at | Dnm2                   | dynamamin 2                                                       | No Class |
| 1452638_s_at | Dnm1l                  | dynamamin 1-like                                                  | No Class |
| 1455367_at   | Dnd1                   | dead end homolog 1 (zebrafish)                                    | No Class |
| 1424592_a_at | Dnase1                 | deoxyribonuclease I                                               | No Class |
| 1431123_s_at | Dnajc8                 | DnaJ (Hsp40) homolog, subfamily C, member 8                       | No Class |
| 1438896_at   | Dnajc6                 | DnaJ (Hsp40) homolog, subfamily C, member 6                       | No Class |
| 1460498_a_at | Dnajc5                 | DnaJ (Hsp40) homolog, subfamily C, member 5                       | No Class |
| 1451389_at   | Dnajc24                | DnaJ (Hsp40) homolog, subfamily C, member 24                      | No Class |
| 1430718_s_at | Dnajc22                | DnaJ (Hsp40) homolog, subfamily C, member 24                      | No Class |
| 1460468_s_at | Dnajc22                | DnaJ (Hsp40) homolog, subfamily C, member 22                      | No Class |
| 1448794_s_at | Dnajc2                 | DnaJ (Hsp40) homolog, subfamily C, member 2                       | No Class |
| 1425076_at   | Dnajc18                | DnaJ (Hsp40) homolog, subfamily C, member 18                      | No Class |



|              |                   |                                                           |          |
|--------------|-------------------|-----------------------------------------------------------|----------|
| 1459791_at   | Dnajc1            | DnaJ (Hsp40) homolog, subfamily C, member 1               | No Class |
| 1447649_x_at | Dnajc1            | DnaJ (Hsp40) homolog, subfamily C, member 1               | No Class |
| 1420629_a_at | Dnaja3            | DnaJ (Hsp40) homolog, subfamily A, member 3               | No Class |
| 1457233_at   | Dnaja2            | DnaJ (Hsp40) homolog, subfamily A, member 2               | No Class |
| 1429476_s_at | Dnaja2            | DnaJ (Hsp40) homolog, subfamily A, member 2               | No Class |
| 1417183_at   | Dnaja2            | DnaJ (Hsp40) homolog, subfamily A, member 2               | No Class |
| 1445408_at   | Dnaic2            | dynein, axonemal, intermediate chain 2                    | No Class |
| 1449863_a_at | Dlx5              | distal-less homeobox 5                                    | No Class |
| 1448877_at   | Dlx2              | distal-less homeobox 2                                    | No Class |
| 1424198_at   | Dlg5              | discs, large homolog 5 (Drosophila)                       | No Class |
| 1456145_at   | Dleu2             | deleted in lymphocytic leukemia, 2                        | No Class |
| 1460602_at   | Dlc1              | deleted in liver cancer 1                                 | No Class |
| 1436173_at   | Dlc1              | deleted in liver cancer 1                                 | No Class |
| 1448669_at   | Dkk3              | dickkopf homolog 3 (Xenopus laevis)                       | No Class |
| 1420512_at   | Dkk2              | dickkopf homolog 2 (Xenopus laevis)                       | No Class |
| 1438016_at   | Dkc1              | dyskeratosis congenita 1, dyskerin homolog (human)        | No Class |
| 1438015_at   | Dkc1              | dyskeratosis congenita 1, dyskerin homolog (human)        | No Class |
| 1451820_at   | Diras1            | DIRAS family, GTP-binding RAS-like 1                      | No Class |
| 1435121_at   | Dio3os            | deiodinase, iodothyronine type III, opposite strand       | No Class |
| 1426081_a_at | Dio2              | deiodinase, iodothyronine, type II                        | No Class |
| 1418938_at   | Dio2              | deiodinase, iodothyronine, type II                        | No Class |
| 1418937_at   | Dio2              | deiodinase, iodothyronine, type II                        | No Class |
| 1426290_at   | Dimt1             | DIM1 dimethyladenosine transferase 1-like (S. cerevisiae) | No Class |
| 1437182_at   | Dido1             | death inducer-obliterator 1                               | No Class |
| 1425768_at   | Diablo            | diablo homolog (Drosophila)                               | No Class |
| 1420427_a_at | Dhx32             | DEAH (Asp-Glu-Ala-His) box polypeptide 32                 | No Class |
| 1438969_x_at | Dhx30             | DEAH (Asp-Glu-Ala-His) box polypeptide 30                 | No Class |
| 1438832_x_at | Dhx30             | DEAH (Asp-Glu-Ala-His) box polypeptide 30                 | No Class |
| 1439076_at   | Dhx29             | DEAH (Asp-Glu-Ala-His) box polypeptide 29                 | No Class |
| 1416144_a_at | Dhx15             | DEAH (Asp-Glu-Ala-His) box polypeptide 15                 | No Class |
| 1424869_at   | Dhrs7b            | dehydrogenase/reductase (SDR family) member 7B            | No Class |
| 1421663_at   | Dhrs2             | dehydrogenase/reductase member 2                          | No Class |
| 1425704_at   | Dhrs11            | dehydrogenase/reductase (SDR family) member 11            | No Class |
| 1434004_at   | Dhps              | deoxyhypusine synthase                                    | No Class |
| 1417582_s_at | Dhodh             | dihydroorotate dehydrogenase                              | No Class |
| 1417581_at   | Dhodh             | dihydroorotate dehydrogenase                              | No Class |
| 1439986_at   | Dgki              | diacylglycerol kinase, iota                               | No Class |
| 1435439_at   | Dgcr8             | DiGeorge syndrome critical region gene 8                  | No Class |
| 1422981_at   | Dgcr8             | DiGeorge syndrome critical region gene 8                  | No Class |
| 1423082_at   | Der1              | Der1-like domain family, member 1                         | No Class |
| 1427014_at   | Dennd4b           | DENN/MADD domain containing 4B                            | No Class |
| 1446558_at   | Dennd4a           | DENN/MADD domain containing 4A                            | No Class |
| 1421807_at   | Defb6             | defensin beta 6                                           | No Class |
| 1440767_at   | Defb41            | defensin beta 41                                          | No Class |
| 1421806_at   | Defb3             | defensin beta 3                                           | No Class |
| 1436857_at   | Defa21 /// Defa22 | defensin, alpha, 21 /// defensin, alpha, 22               | No Class |
| 1432000_a_at | Dedd              | death effector domain-containing                          | No Class |
| 1419367_at   | Decr1             | 2,4-dienoyl CoA reductase 1, mitochondrial                | No Class |
| 1451777_at   | Ddx60             | DEAD (Asp-Glu-Ala-Asp) box polypeptide 60                 | No Class |
| 1439114_at   | Ddx60             | DEAD (Asp-Glu-Ala-Asp) box polypeptide 60                 | No Class |
| 1456890_at   | Ddx58             | DEAD (Asp-Glu-Ala-Asp) box polypeptide 58                 | No Class |
| 1436562_at   | Ddx58             | DEAD (Asp-Glu-Ala-Asp) box polypeptide 58                 | No Class |
| 1438381_x_at | Ddx47             | DEAD (Asp-Glu-Ala-Asp) box polypeptide 47                 | No Class |
| 1457744_at   | Ddx46             | DEAD (Asp-Glu-Ala-Asp) box polypeptide 46                 | No Class |
| 1455103_at   | Ddx46             | DEAD (Asp-Glu-Ala-Asp) box polypeptide 46                 | No Class |
| 1443719_x_at | Ddx42             | DEAD (Asp-Glu-Ala-Asp) box polypeptide 42                 | No Class |
| 1452077_at   | Ddx3y             | DEAD (Asp-Glu-Ala-Asp) box polypeptide 3, Y-linked        | No Class |

|              |                   |                                                                                           |          |
|--------------|-------------------|-------------------------------------------------------------------------------------------|----------|
| 1426439_at   | Ddx3y             | DEAD (Asp-Glu-Ala-Asp) box polypeptide 3, Y-linked                                        | No Class |
| 1426438_at   | Ddx3y             | DEAD (Asp-Glu-Ala-Asp) box polypeptide 3, Y-linked                                        | No Class |
| 1416467_at   | Ddx3x             | DEAD/H (Asp-Glu-Ala-Asp/His) box polypeptide 3, X-linked                                  | No Class |
| 1438962_s_at | Ddx31             | DEAD/H (Asp-Glu-Ala-Asp/His) box polypeptide 31                                           | No Class |
| 1448271_a_at | Ddx21             | DEAD (Asp-Glu-Ala-Asp) box polypeptide 21                                                 | No Class |
| 1448270_at   | Ddx21             | DEAD (Asp-Glu-Ala-Asp) box polypeptide 21                                                 | No Class |
| 1425204_s_at | Ddx19a /// Ddx19b | DEAD (Asp-Glu-Ala-Asp) box polypeptide 19a /// DEAD (Asp-Glu-Ala-Asp) box polypeptide 19b | No Class |
| 1416070_a_at | Ddx18             | DEAD (Asp-Glu-Ala-Asp) box polypeptide 18                                                 | No Class |
| 1428563_at   | Ddx10             | DEAD (Asp-Glu-Ala-Asp) box polypeptide 10                                                 | No Class |
| 1415915_at   | Ddx1              | DEAD (Asp-Glu-Ala-Asp) box polypeptide 1                                                  | No Class |
| 1456226_x_at | Ddr1              | discoidin domain receptor family, member 1                                                | No Class |
| 1439382_x_at | Ddr1              | discoidin domain receptor family, member 1                                                | No Class |
| 1435820_x_at | Ddr1              | discoidin domain receptor family, member 1                                                | No Class |
| 1451751_at   | Ddit4l            | DNA-damage-inducible transcript 4-like                                                    | No Class |
| 1444139_at   | Ddit4l            | DNA-damage-inducible transcript 4-like                                                    | No Class |
| 1439332_at   | Ddit4l            | DNA-damage-inducible transcript 4-like                                                    | No Class |
| 1436680_s_at | Ddb2              | damage specific DNA binding protein 2                                                     | No Class |
| 1415735_at   | Ddb1              | damage specific DNA binding protein 1                                                     | No Class |
| 1455400_at   | Ddah1             | dimethylarginine dimethylaminohydrolase 1                                                 | No Class |
| 1454995_at   | Ddah1             | dimethylarginine dimethylaminohydrolase 1                                                 | No Class |
| 1429299_at   | Ddah1             | dimethylarginine dimethylaminohydrolase 1                                                 | No Class |
| 1429298_at   | Ddah1             | dimethylarginine dimethylaminohydrolase 1                                                 | No Class |
| 1429038_at   | Dda1              | DET1 and DDB1 associated 1                                                                | No Class |
| 1448974_at   | Dcx               | doublecortin                                                                              | No Class |
| 1432271_a_at | Dcun1d5           | DCN1, defective in cullin neddylation 1, domain containing 5 (S. cerevisiae)              | No Class |
| 1455053_a_at | Dcun1d1           | DCN1, defective in cullin neddylation 1, domain containing 1 (S. cerevisiae)              | No Class |
| 1415748_a_at | Dctn5             | dynactin 5                                                                                | No Class |
| 1422521_at   | Dctn1             | dynactin 1                                                                                | No Class |
| 1454659_at   | Dctd              | dCMP deaminase                                                                            | No Class |
| 1441868_x_at | Dcst2             | DC-STAMP domain containing 2                                                              | No Class |
| 1424080_at   | Dcps              | decapping enzyme, scavenger                                                               | No Class |
| 1449368_at   | Dcn               | decorin                                                                                   | No Class |
| 1459661_at   | Dcdc2a            | doublecortin domain containing 2a                                                         | No Class |
| 1449891_a_at | Dcbld2            | discoidin, CUB and LCCL domain containing 2                                               | No Class |
| 1437635_at   | Dcbld2            | discoidin, CUB and LCCL domain containing 2                                               | No Class |
| 1420526_at   | Dcbld2            | discoidin, CUB and LCCL domain containing 2                                               | No Class |
| 1418966_a_at | Dcbld1            | discoidin, CUB and LCCL domain containing 1                                               | No Class |
| 1460205_at   | Dcakd             | dephospho-CoA kinase domain containing                                                    | No Class |
| 1424777_at   | Dcaf4             | DDB1 and CUL4 associated factor 4                                                         | No Class |
| 1430059_at   | Dcaf12            | DDB1 and CUL4 associated factor 12                                                        | No Class |
| 1460334_at   | Dbnl              | drebrin-like                                                                              | No Class |
| 1456943_a_at | Dbndd2            | dysbindin (dystrobrevin binding protein 1) domain containing 2                            | No Class |
| 1439968_x_at | Dbndd2            | dysbindin (dystrobrevin binding protein 1) domain containing 2                            | No Class |
| 1419904_at   | Dbndd2            | Dysbindin (dystrobrevin binding protein 1) domain containing 2                            | No Class |
| 1449307_at   | Dbndd1            | dysbindin (dystrobrevin binding protein 1) domain containing 1                            | No Class |
| 1455976_x_at | Dbi               | diazepam binding inhibitor                                                                | No Class |
| 1438093_x_at | Dbi               | diazepam binding inhibitor                                                                | No Class |
| 1433991_x_at | Dbi               | diazepam binding inhibitor                                                                | No Class |
| 1449502_at   | Dazl              | deleted in azoospermia-like                                                               | No Class |
| 1419542_at   | Dazl              | deleted in azoospermia-like                                                               | No Class |
| 1423800_at   | Dars              | aspartyl-tRNA synthetase                                                                  | No Class |
| 1423446_at   | Dapk3             | death-associated protein kinase 3                                                         | No Class |
| 1456131_x_at | Dag1              | dystroglycan 1                                                                            | No Class |
| 1426779_x_at | Dag1              | dystroglycan 1                                                                            | No Class |
| 1426778_at   | Dag1              | dystroglycan 1                                                                            | No Class |
| 1423872_a_at | Dag1              | dystroglycan 1                                                                            | No Class |
| 1417937_at   | Dact1             | dapper homolog 1, antagonist of beta-catenin (xenopus)                                    | No Class |

|              |               |                                                                |          |
|--------------|---------------|----------------------------------------------------------------|----------|
| 1433743_at   | Dach1         | dachshund 1 (Drosophila)                                       | No Class |
| 1423805_at   | Dab2          | disabled homolog 2 (Drosophila)                                | No Class |
| 1435578_s_at | Dab1          | disabled homolog 1 (Drosophila)                                | No Class |
| 1435577_at   | Dab1          | disabled homolog 1 (Drosophila)                                | No Class |
| 1427307_a_at | Dab1          | disabled homolog 1 (Drosophila)                                | No Class |
| 1421100_a_at | Dab1          | disabled homolog 1 (Drosophila)                                | No Class |
| 1457776_at   | D9Ertd720e    | DNA segment, Chr 9, ERATO Doi 720, expressed                   | No Class |
| 1457484_at   | D930050J11    | hypothetical D930050J11                                        | No Class |
| 1446219_at   | D930015E06Rik | RIKEN cDNA D930015E06 gene                                     | No Class |
| 1440625_at   | D930015E06Rik | RIKEN cDNA D930015E06 gene                                     | No Class |
| 1426834_s_at | D930015E06Rik | RIKEN cDNA D930015E06 gene                                     | No Class |
| 1442416_at   | D930001B02    | hypothetical protein D930001B02                                | No Class |
| 1457905_at   | D7Ertd59e     | DNA segment, Chr 7, ERATO Doi 59, expressed                    | No Class |
| 1449755_at   | D7Ertd183e    | DNA segment, Chr 7, ERATO Doi 183, expressed                   | No Class |
| 1430372_at   | D730045B01Rik | RIKEN cDNA D730045B01 gene                                     | No Class |
| 1436619_at   | D630045M09Rik | RIKEN cDNA D630045M09 gene                                     | No Class |
| 1437085_at   | D630039A03Rik | RIKEN cDNA D630039A03 gene                                     | No Class |
| 1439340_at   | D630036G22Rik | RIKEN cDNA D630036G22 gene                                     | No Class |
| 1435570_s_at | D630029K05Rik | RIKEN cDNA D630029K05 gene                                     | No Class |
| 1446822_at   | D5Ertd543e    | DNA segment, Chr 5, ERATO Doi 543, expressed                   | No Class |
| 1443242_at   | D5Ertd121e    | DNA segment, Chr 5, ERATO Doi 121, expressed                   | No Class |
| 1454249_at   | D530049N12Rik | RIKEN cDNA D530049N12 gene                                     | No Class |
| 1448538_a_at | D4Wsu53e      | DNA segment, Chr 4, Wayne State University 53, expressed       | No Class |
| 1419807_at   | D4Ertd335e    | DNA segment, Chr 4, ERATO Doi 335, expressed                   | No Class |
| 1434482_at   | D4Ertd22e     | DNA segment, Chr 4, ERATO Doi 22, expressed                    | No Class |
| 1442111_at   | D430033H22Rik | RIKEN cDNA D430033H22 gene                                     | No Class |
| 1455447_at   | D430019H16Rik | RIKEN cDNA D430019H16 gene                                     | No Class |
| 1444432_at   | D330040H18Rik | RIKEN cDNA D330040H18 gene                                     | No Class |
| 1434428_at   | D330028D13Rik | RIKEN cDNA D330028D13 gene                                     | No Class |
| 1434119_at   | D2Wsu81e      | DNA segment, Chr 2, Wayne State University 81, expressed       | No Class |
| 1442280_at   | D2Ertd750e    | DNA segment, Chr 2, ERATO Doi 750, expressed                   | No Class |
| 1423464_at   | D2Ertd750e    | DNA segment, Chr 2, ERATO Doi 750, expressed                   | No Class |
| 1439139_at   | D2Ertd640e    | DNA segment, Chr 2, ERATO Doi 640, expressed                   | No Class |
| 1420253_at   | D2Ertd63e     | DNA segment, Chr 2, ERATO Doi 63, expressed                    | No Class |
| 1438222_at   | D2Ertd612e    | DNA segment, Chr 2, ERATO Doi 612, expressed                   | No Class |
| 1446005_at   | D2Ertd337e    | DNA segment, Chr 2, ERATO Doi 337, expressed                   | No Class |
| 1446133_at   | D2Ertd295e    | DNA segment, Chr 2, ERATO Doi 295, expressed                   | No Class |
| 1441558_at   | D230044B12Rik | RIKEN cDNA D230044B12 gene                                     | No Class |
| 1442151_at   | D230040A04Rik | RIKEN cDNA D230040A04 gene                                     | No Class |
| 1459118_at   | D230038C21    | hypothetical protein D230038C21                                | No Class |
| 1452824_at   | D1Bwg0212e    | DNA segment, Chr 1, Brigham & Women s Genetics 0212 expressed  | No Class |
| 1445094_at   | D19Ertd744e   | DNA segment, Chr 19, ERATO Doi 744, expressed                  | No Class |
| 1434173_s_at | D19Bwg1357e   | DNA segment, Chr 19, Brigham & Women s Genetics 1357 expressed | No Class |
| 1426932_at   | D19Bwg1357e   | DNA segment, Chr 19, Brigham & Women s Genetics 1357 expressed | No Class |
| 1447662_x_at | D18Ertd653e   | DNA segment, Chr 18, ERATO Doi 653, expressed                  | No Class |
| 1460741_x_at | D17Wsu92e     | DNA segment, Chr 17, Wayne State University 92, expressed      | No Class |
| 1416696_at   | D17Wsu104e    | DNA segment, Chr 17, Wayne State University 104, expressed     | No Class |
| 1451466_at   | D16Ertd472e   | DNA segment, Chr 16, ERATO Doi 472, expressed                  | No Class |
| 1436125_at   | D16Ertd472e   | DNA segment, Chr 16, ERATO Doi 472, expressed                  | No Class |
| 1429897_a_at | D16Ertd472e   | DNA segment, Chr 16, ERATO Doi 472, expressed                  | No Class |
| 1457304_at   | D13Ertd787e   | DNA segment, Chr 13, ERATO Doi 787, expressed                  | No Class |
| 1420098_s_at | D13Ertd787e   | DNA segment, Chr 13, ERATO Doi 787, expressed                  | No Class |
| 1446929_at   | D130062J21Rik | RIKEN cDNA D130062J21 gene                                     | No Class |
| 1439839_at   | D130051D11Rik | RIKEN cDNA D130051D11 gene                                     | No Class |
| 1440985_at   | D130023J23Rik | RIKEN cDNA D130023J23 gene                                     | No Class |
| 1442531_at   | D12Ertd123e   | DNA segment, Chr 12, ERATO Doi 123, expressed                  | No Class |
| 1449258_at   | D11Wsu99e     | DNA segment, Chr 11, Wayne State University 99, expressed      | No Class |

|              |                       |                                                                                                          |          |
|--------------|-----------------------|----------------------------------------------------------------------------------------------------------|----------|
| 1457539_at   | D10Ertd709e           | DNA segment, Chr 10, ERATO Doi 709, expressed                                                            | No Class |
| 1449339_at   | D10Ert641e            | DNA segment, Chr 10, ERATO Doi 641, expressed                                                            | No Class |
| 1455995_at   | D10Bwg1379e           | DNA segment, Chr 10, Brigham & Women s Genetics 1379 expressed                                           | No Class |
| 1434097_at   | D10627                | cDNA sequence D10627                                                                                     | No Class |
| 1427518_at   | D10627                | cDNA sequence D10627                                                                                     | No Class |
| 1423879_at   | D030056L22Rik         | RIKEN cDNA D030056L22 gene                                                                               | No Class |
| 1438581_at   | Cytsa                 | cytospin A                                                                                               | No Class |
| 1428300_at   | Cytsa                 | cytospin A                                                                                               | No Class |
| 1451206_s_at | Cytip                 | cytohesin 1 interacting protein                                                                          | No Class |
| 1443928_at   | Cytip                 | cytohesin 1 interacting protein                                                                          | No Class |
| 1435697_a_at | Cytip                 | cytohesin 1 interacting protein                                                                          | No Class |
| 1448997_at   | Cyth1                 | cytohesin 1                                                                                              | No Class |
| 1418183_a_at | Cyth1                 | cytohesin 1                                                                                              | No Class |
| 1438133_a_at | Cyr61                 | cysteine rich protein 61                                                                                 | No Class |
| 1416039_x_at | Cyr61                 | cysteine rich protein 61                                                                                 | No Class |
| 1421075_s_at | Cyp7b1                | cytochrome P450, family 7, subfamily b, polypeptide 1                                                    | No Class |
| 1421074_at   | Cyp7b1                | cytochrome P450, family 7, subfamily b, polypeptide 1                                                    | No Class |
| 1438743_at   | Cyp7a1                | cytochrome P450, family 7, subfamily a, polypeptide 1                                                    | No Class |
| 1440134_at   | Cyp4a31               | cytochrome P450, family 4, subfamily a, polypeptide 31                                                   | No Class |
| 1419704_at   | Cyp3a41a /// Cyp3a41b | cytochrome P450, family 3, subfamily a, polypeptide 41A /// cytochrome P450, family 3, subfamily a, poly | No Class |
| 1417531_at   | Cyp2j5                | cytochrome P450, family 2, subfamily j, polypeptide 5                                                    | No Class |
| 1460011_at   | Cyp26b1               | cytochrome P450, family 26, subfamily b, polypeptide 1                                                   | No Class |
| 1455691_at   | Cyp21a1               | cytochrome P450, family 21, subfamily a, polypeptide 1                                                   | No Class |
| 1450574_at   | Cyp11b2               | cytochrome P450, family 11, subfamily b, polypeptide 2                                                   | No Class |
| 1457604_x_at | Cyp11a1               | cytochrome P450, family 11, subfamily a, polypeptide 1                                                   | No Class |
| 1429201_at   | Cyld                  | cyldromatosis (turban tumor syndrome)                                                                    | No Class |
| 1423630_at   | Cygb                  | cytoglobin                                                                                               | No Class |
| 1456071_a_at | Cycs /// Gm10053      | cytochrome c, somatic /// predicted gene 10053                                                           | No Class |
| 1422484_at   | Cycs                  | cytochrome c, somatic                                                                                    | No Class |
| 1454895_at   | Cybasc3               | cytochrome b, ascorbate dependent 3                                                                      | No Class |
| 1422812_at   | Cxcr6                 | chemokine (C-X-C motif) receptor 6                                                                       | No Class |
| 1418457_at   | Cxcl14                | chemokine (C-X-C motif) ligand 14                                                                        | No Class |
| 1418456_a_at | Cxcl14                | chemokine (C-X-C motif) ligand 14                                                                        | No Class |
| 1448859_at   | Cxcl13                | chemokine (C-X-C motif) ligand 13                                                                        | No Class |
| 1417851_at   | Cxcl13                | chemokine (C-X-C motif) ligand 13                                                                        | No Class |
| 1448823_at   | Cxcl12                | chemokine (C-X-C motif) ligand 12                                                                        | No Class |
| 1417574_at   | Cxcl12                | chemokine (C-X-C motif) ligand 12                                                                        | No Class |
| 1457644_s_at | Cxcl1                 | chemokine (C-X-C motif) ligand 1                                                                         | No Class |
| 1441855_x_at | Cxcl1                 | chemokine (C-X-C motif) ligand 1                                                                         | No Class |
| 1419209_at   | Cxcl1                 | chemokine (C-X-C motif) ligand 1                                                                         | No Class |
| 1453282_at   | Cxadr                 | cox sackie virus and adenovirus receptor                                                                 | No Class |
| 1452391_at   | Cxadr                 | cox sackie virus and adenovirus receptor                                                                 | No Class |
| 1427321_s_at | Cxadr                 | cox sackie virus and adenovirus receptor                                                                 | No Class |
| 1450020_at   | Cx3cr1                | chemokine (C-X3-C) receptor 1                                                                            | No Class |
| 1426268_at   | Cwh43                 | cell wall biogenesis 43 C-terminal homolog (S. cerevisiae)                                               | No Class |
| 1434065_at   | Cwf19l1               | CWF19-like 1, cell cycle control (S. pombe)                                                              | No Class |
| 1431016_at   | Cwf19l1               | CWF19-like 1, cell cycle control (S. pombe)                                                              | No Class |
| 1417039_a_at | Cul7                  | cullin 7                                                                                                 | No Class |
| 1417454_at   | Cul4b                 | cullin 4B                                                                                                | No Class |
| 1417453_at   | Cul4b                 | cullin 4B                                                                                                | No Class |
| 1451447_at   | Cuedc1                | CUE domain containing 1                                                                                  | No Class |
| 1452270_s_at | Cubn                  | cubilin (intrinsic factor-cobalamin receptor)                                                            | No Class |
| 1426990_at   | Cubn                  | cubilin (intrinsic factor-cobalamin receptor)                                                            | No Class |
| 1428350_at   | Ctu2                  | cytosolic thiouridylase subunit 2 homolog (S. pombe)                                                     | No Class |
| 1433908_a_at | Cttn                  | cortactin                                                                                                | No Class |
| 1423917_a_at | Cttn                  | cortactin                                                                                                | No Class |
| 1421315_s_at | Cttn                  | cortactin                                                                                                | No Class |

|              |                   |                                                                                                        |          |
|--------------|-------------------|--------------------------------------------------------------------------------------------------------|----------|
| 1421313_s_at | Cttn              | cortactin                                                                                              | No Class |
| 1448591_at   | Ctss              | cathepsin S                                                                                            | No Class |
| 1451310_a_at | Ctsl              | cathepsin L                                                                                            | No Class |
| 1419594_at   | Ctsg              | cathepsin G                                                                                            | No Class |
| 1446834_at   | Ctsc              | Cathepsin C                                                                                            | No Class |
| 1437939_s_at | Ctsc              | cathepsin C                                                                                            | No Class |
| 1445830_at   | Ctnnd1            | catenin (cadherin associated protein), delta 1                                                         | No Class |
| 1437448_s_at | Ctnnd1            | catenin (cadherin associated protein), delta 1                                                         | No Class |
| 1450008_a_at | Ctnnb1            | catenin (cadherin associated protein), beta 1                                                          | No Class |
| 1430533_a_at | Ctnnb1            | catenin (cadherin associated protein), beta 1                                                          | No Class |
| 1448149_at   | Ctnna1            | catenin (cadherin associated protein), alpha 1                                                         | No Class |
| 1437807_x_at | Ctnna1            | catenin (cadherin associated protein), alpha 1                                                         | No Class |
| 1452352_at   | Ctla2b            | cytotoxic T lymphocyte-associated protein 2 beta                                                       | No Class |
| 1416811_s_at | Ctla2a /// Ctla2b | cytotoxic T lymphocyte-associated protein 2 alpha /// cytotoxic T lymphocyte-associated protein 2 beta | No Class |
| 1448471_a_at | Ctla2a            | cytotoxic T lymphocyte-associated protein 2 alpha                                                      | No Class |
| 1416953_at   | Ctgf              | connective tissue growth factor                                                                        | No Class |
| 1448597_at   | Cstf1             | cleavage stimulation factor, 3 pre-RNA, subunit 1                                                      | No Class |
| 1450944_at   | Cspg4             | chondroitin sulfate proteoglycan 4                                                                     | No Class |
| 1423341_at   | Cspg4             | chondroitin sulfate proteoglycan 4                                                                     | No Class |
| 1416728_at   | Csnk2b            | casein kinase 2, beta polypeptide                                                                      | No Class |
| 1449932_at   | Csnk1d            | casein kinase 1, delta                                                                                 | No Class |
| 1451497_at   | Csnk1a1           | casein kinase 1, alpha 1                                                                               | No Class |
| 1452366_at   | Csgalnact1        | chondroitin sulfate N-acetylgalactosaminyltransferase 1                                                | No Class |
| 1452365_at   | Csgalnact1        | chondroitin sulfate N-acetylgalactosaminyltransferase 1                                                | No Class |
| 1418806_at   | Csf3r             | colony stimulating factor 3 receptor (granulocyte)                                                     | No Class |
| 1455660_at   | Csf2rb            | colony stimulating factor 2 receptor, beta, low-affinity (granulocyte-macrophage)                      | No Class |
| 1437841_x_at | Csdc2             | cold shock domain containing C2, RNA binding                                                           | No Class |
| 1422577_at   | Cs                | citrate synthase                                                                                       | No Class |
| 1430547_s_at | Cryz1l            | crystallin, zeta (quinone reductase)-like 1                                                            | No Class |
| 1429948_x_at | Crygf             | crystallin, gamma F                                                                                    | No Class |
| 1419005_at   | Crybb3            | crystallin, beta B3                                                                                    | No Class |
| 1434369_a_at | Cryab             | crystallin, alpha B                                                                                    | No Class |
| 1416455_a_at | Cryab             | crystallin, alpha B                                                                                    | No Class |
| 1421946_at   | Crp               | C-reactive protein, pentraxin-related                                                                  | No Class |
| 1418097_a_at | Crif2             | cytokine receptor-like factor 2                                                                        | No Class |
| 1421954_at   | Crkl              | v-crk sarcoma virus CT10 oncogene homolog (avian)-like                                                 | No Class |
| 1421953_at   | Crkl              | v-crk sarcoma virus CT10 oncogene homolog (avian)-like                                                 | No Class |
| 1436835_at   | Crk               | v-crk sarcoma virus CT10 oncogene homolog (avian)                                                      | No Class |
| 1425855_a_at | Crk               | v-crk sarcoma virus CT10 oncogene homolog (avian)                                                      | No Class |
| 1460458_at   | Crispld2          | cysteine-rich secretory protein LCCL domain containing 2                                               | No Class |
| 1437056_x_at | Crispld2          | cysteine-rich secretory protein LCCL domain containing 2                                               | No Class |
| 1434758_at   | Crispld2          | cysteine-rich secretory protein LCCL domain containing 2                                               | No Class |
| 1416717_at   | Crisp2            | cysteine-rich secretory protein 2                                                                      | No Class |
| 1415948_at   | Creg1             | cellular repressor of E1A-stimulated genes 1                                                           | No Class |
| 1452857_at   | Crebzf            | CREB/ATF bZIP transcription factor                                                                     | No Class |
| 1425698_a_at | Crebzf            | CREB/ATF bZIP transcription factor                                                                     | No Class |
| 1435224_at   | Crebbp            | CREB binding protein                                                                                   | No Class |
| 1452381_at   | Creb3l2           | cAMP responsive element binding protein 3-like 2                                                       | No Class |
| 1452901_at   | Creb1             | cAMP responsive element binding protein 1                                                              | No Class |
| 1428755_at   | Creb1             | cAMP responsive element binding protein 1                                                              | No Class |
| 1455115_a_at | Crab3             | crumbs homolog 3 (Drosophila)                                                                          | No Class |
| 1456042_s_at | Cramp1l           | Crn, cramped-like (Drosophila)                                                                         | No Class |
| 1420326_s_at | Cramp1l           | Crn, cramped-like (Drosophila)                                                                         | No Class |
| 1435281_at   | Cpt1c             | carnitine palmitoyltransferase 1c                                                                      | No Class |
| 1453356_at   | Cpsf7             | cleavage and polyadenylation specific factor 7                                                         | No Class |
| 1455540_at   | Cps1              | carbamoyl-phosphate synthetase 1                                                                       | No Class |
| 1431146_a_at | Cpne8             | copine VIII                                                                                            | No Class |

|              |                      |                                                                                           |          |
|--------------|----------------------|-------------------------------------------------------------------------------------------|----------|
| 1453009_at   | Cpm                  | carboxypeptidase M                                                                        | No Class |
| 1429413_at   | Cpm                  | carboxypeptidase M                                                                        | No Class |
| 1420618_at   | Cpeb4                | cytoplasmic polyadenylation element binding protein 4                                     | No Class |
| 1420617_at   | Cpeb4                | cytoplasmic polyadenylation element binding protein 4                                     | No Class |
| 1415949_at   | Cpe /// LOC100046434 | carboxypeptidase E /// similar to carboxypeptidase E                                      | No Class |
| 1447392_s_at | Cpd                  | carboxypeptidase D                                                                        | No Class |
| 1434547_at   | Cpd                  | carboxypeptidase D                                                                        | No Class |
| 1418020_s_at | Cpd                  | carboxypeptidase D                                                                        | No Class |
| 1418019_at   | Cpd                  | carboxypeptidase D                                                                        | No Class |
| 1418018_at   | Cpd                  | carboxypeptidase D                                                                        | No Class |
| 1455393_at   | Cp                   | ceruloplasmin                                                                             | No Class |
| 1448735_at   | Cp                   | ceruloplasmin                                                                             | No Class |
| 1448734_at   | Cp                   | ceruloplasmin                                                                             | No Class |
| 1441326_at   | Cp                   | ceruloplasmin                                                                             | No Class |
| 1417497_at   | Cp                   | ceruloplasmin                                                                             | No Class |
| 1417496_at   | Cp                   | ceruloplasmin                                                                             | No Class |
| 1417495_x_at | Cp                   | ceruloplasmin                                                                             | No Class |
| 1417494_a_at | Cp                   | ceruloplasmin                                                                             | No Class |
| 1455167_at   | Cox8c                | cytochrome c oxidase, subunit VIIIc                                                       | No Class |
| 1443789_x_at | Cox8c                | cytochrome c oxidase, subunit VIIIc                                                       | No Class |
| 1415710_at   | Cox18                | COX18 cytochrome c oxidase assembly homolog ( <i>S. cerevisiae</i> )                      | No Class |
| 1460376_a_at | Cox15                | COX15 homolog, cytochrome c oxidase assembly protein (yeast)                              | No Class |
| 1459977_x_at | Cox10                | COX10 homolog, cytochrome c oxidase assembly protein, heme A: farnesyltransferase (yeast) | No Class |
| 1436838_x_at | Cotl1                | coactosin-like 1 ( <i>Dictyostelium</i> )                                                 | No Class |
| 1436236_x_at | Cotl1                | coactosin-like 1 ( <i>Dictyostelium</i> )                                                 | No Class |
| 1425801_x_at | Cotl1                | coactosin-like 1 ( <i>Dictyostelium</i> )                                                 | No Class |
| 1416002_x_at | Cotl1                | coactosin-like 1 ( <i>Dictyostelium</i> )                                                 | No Class |
| 1416001_a_at | Cotl1                | coactosin-like 1 ( <i>Dictyostelium</i> )                                                 | No Class |
| 1437524_x_at | Coro7                | coronin 7                                                                                 | No Class |
| 1437146_x_at | Coro7                | coronin 7                                                                                 | No Class |
| 1428150_at   | Coro7                | coronin 7                                                                                 | No Class |
| 1428149_at   | Coro7                | coronin 7                                                                                 | No Class |
| 1428148_s_at | Coro7                | coronin 7                                                                                 | No Class |
| 1428147_at   | Coro7                | coronin 7                                                                                 | No Class |
| 1428487_s_at | Coq10b               | coenzyme Q10 homolog B ( <i>S. cerevisiae</i> )                                           | No Class |
| 1429078_a_at | Cops7a               | COP9 (constitutive photomorphogenic) homolog, subunit 7a ( <i>Arabidopsis thaliana</i> )  | No Class |
| 1423245_at   | Cops7a               | COP9 (constitutive photomorphogenic) homolog, subunit 7a ( <i>Arabidopsis thaliana</i> )  | No Class |
| 1451366_at   | Cops6                | COP9 (constitutive photomorphogenic) homolog, subunit 6 ( <i>Arabidopsis thaliana</i> )   | No Class |
| 1416163_at   | Cops4                | COP9 (constitutive photomorphogenic) homolog, subunit 4 ( <i>Arabidopsis thaliana</i> )   | No Class |
| 1416678_at   | Cops3                | COP9 (constitutive photomorphogenic) homolog, subunit 3 ( <i>Arabidopsis thaliana</i> )   | No Class |
| 1437039_at   | Cops2                | COP9 (constitutive photomorphogenic) homolog, subunit 2 ( <i>Arabidopsis thaliana</i> )   | No Class |
| 1423459_at   | Cops2                | COP9 (constitutive photomorphogenic) homolog, subunit 2 ( <i>Arabidopsis thaliana</i> )   | No Class |
| 1415670_at   | Copg                 | coatamer protein complex, subunit gamma                                                   | No Class |
| 1416384_a_at | Cope                 | coatamer protein complex, subunit epsilon                                                 | No Class |
| 1452102_at   | Copb2                | coatamer protein complex, subunit beta 2 (beta prime)                                     | No Class |
| 1423301_at   | Copb1                | coatamer protein complex, subunit beta 1                                                  | No Class |
| 1435863_at   | Commmd6              | COMM domain containing 6                                                                  | No Class |
| 1433594_at   | Commmd2              | COMM domain containing 2                                                                  | No Class |
| 1419693_at   | Colect12             | collectin sub-family member 12                                                            | No Class |
| 1416741_at   | Col5a1               | collagen, type V, alpha 1                                                                 | No Class |
| 1425476_at   | Col4a5               | collagen, type IV, alpha 5                                                                | No Class |
| 1425475_at   | Col4a5               | collagen, type IV, alpha 5                                                                | No Class |
| 1424051_at   | Col4a2               | collagen, type IV, alpha 2                                                                | No Class |
| 1452035_at   | Col4a1               | collagen, type IV, alpha 1                                                                | No Class |
| 1426348_at   | Col4a1               | collagen, type IV, alpha 1                                                                | No Class |
| 1446326_at   | Col1a2               | collagen, type I, alpha 2                                                                 | No Class |
| 1416692_at   | Coil                 | coilin                                                                                    | No Class |

|              |                        |                                                                                                     |          |
|--------------|------------------------|-----------------------------------------------------------------------------------------------------|----------|
| 1434917_at   | Cobl                   | cordon-bleu                                                                                         | No Class |
| 1443829_x_at | Coasy                  | Coenzyme A synthase                                                                                 | No Class |
| 1435165_at   | Cntn2                  | contactin 2                                                                                         | No Class |
| 1449296_a_at | Cnp                    | 2,3-cyclic nucleotide 3 phosphodiesterase                                                           | No Class |
| 1437341_x_at | Cnp                    | 2,3-cyclic nucleotide 3 phosphodiesterase                                                           | No Class |
| 1418980_a_at | Cnp                    | 2,3-cyclic nucleotide 3 phosphodiesterase                                                           | No Class |
| 1421000_at   | Cnot4                  | CCR4-NOT transcription complex, subunit 4                                                           | No Class |
| 1447212_at   | Cnot2                  | CCR4-NOT transcription complex, subunit 2                                                           | No Class |
| 1459757_x_at | Cnot10                 | CCR4-NOT transcription complex, subunit 10                                                          | No Class |
| 1459756_at   | Cnot10                 | CCR4-NOT transcription complex, subunit 10                                                          | No Class |
| 1459783_s_at | Cno                    | cappuccino                                                                                          | No Class |
| 1456380_x_at | Cnn3 /// LOC100047856  | calponin 3, acidic /// similar to calponin 3, acidic                                                | No Class |
| 1455570_x_at | Cnn3 /// LOC100047856  | calponin 3, acidic /// similar to calponin 3, acidic                                                | No Class |
| 1438354_x_at | Cnn3 /// LOC100047856  | calponin 3, acidic /// similar to calponin 3, acidic                                                | No Class |
| 1436836_x_at | Cnn3 /// LOC100047856  | calponin 3, acidic /// similar to calponin 3, acidic                                                | No Class |
| 1436759_x_at | Cnn3 /// LOC100047856  | calponin 3, acidic /// similar to calponin 3, acidic                                                | No Class |
| 1426724_at   | Cnn3 /// LOC100047856  | calponin 3, acidic /// similar to calponin 3, acidic                                                | No Class |
| 1423727_at   | Cnih                   | cornichon homolog (Drosophila)                                                                      | No Class |
| 1460177_at   | Cndp2                  | CNDP dipeptidase 2 (metallopeptidase M20 family)                                                    | No Class |
| 1448263_a_at | Cndp2                  | CNDP dipeptidase 2 (metallopeptidase M20 family)                                                    | No Class |
| 1427964_at   | Cmtm8                  | CKLF-like MARVEL transmembrane domain containing 8                                                  | No Class |
| 1448316_at   | Cmtm3 /// LOC100046883 | CKLF-like MARVEL transmembrane domain containing 3 /// similar to CKLF-like MARVEL transmembrane dc | No Class |
| 1421109_at   | Cml2                   | camello-like 2                                                                                      | No Class |
| 1447019_at   | Cmah                   | cytidine monophospho-N-acetylneuraminic acid hydroxylase                                            | No Class |
| 1440458_at   | Cmah                   | cytidine monophospho-N-acetylneuraminic acid hydroxylase                                            | No Class |
| 1436039_at   | Cmah                   | cytidine monophospho-N-acetylneuraminic acid hydroxylase                                            | No Class |
| 1421214_at   | Cmah                   | cytidine monophospho-N-acetylneuraminic acid hydroxylase                                            | No Class |
| 1431684_at   | Clvs1                  | clavesin 1                                                                                          | No Class |
| 1454849_x_at | Clu /// LOC100046120   | clusterin /// similar to clusterin                                                                  | No Class |
| 1437689_x_at | Clu /// LOC100046120   | clusterin /// similar to clusterin                                                                  | No Class |
| 1437458_x_at | Clu /// LOC100046120   | clusterin /// similar to clusterin                                                                  | No Class |
| 1418626_a_at | Clu /// LOC100046120   | clusterin /// similar to clusterin                                                                  | No Class |
| 1436935_x_at | Clns1a                 | chloride channel, nucleotide-sensitive, 1A                                                          | No Class |
| 1423181_s_at | Clns1a                 | chloride channel, nucleotide-sensitive, 1A                                                          | No Class |
| 1459992_x_at | Cln8                   | ceroid-lipofuscinosis, neuronal 8                                                                   | No Class |
| 1448455_at   | Cln8                   | ceroid-lipofuscinosis, neuronal 8                                                                   | No Class |
| 1439117_at   | Clmn                   | calmin                                                                                              | No Class |
| 1429166_s_at | Clmn                   | calmin                                                                                              | No Class |
| 1425321_a_at | Clmn                   | calmin                                                                                              | No Class |
| 1427663_a_at | Clk4                   | CDC like kinase 4                                                                                   | No Class |
| 1435504_at   | Clip4                  | CAP-GLY domain containing linker protein family, member 4                                           | No Class |
| 1427279_at   | Clip4                  | CAP-GLY domain containing linker protein family, member 4                                           | No Class |
| 1427278_at   | Clip4                  | CAP-GLY domain containing linker protein family, member 4                                           | No Class |
| 1435256_at   | Clip3                  | CAP-GLY domain containing linker protein 3                                                          | No Class |
| 1430543_at   | Clip3                  | CAP-GLY domain containing linker protein 3                                                          | No Class |
| 1438606_a_at | Clic4                  | chloride intracellular channel 4 (mitochondrial)                                                    | No Class |
| 1423393_at   | Clic4                  | chloride intracellular channel 4 (mitochondrial)                                                    | No Class |
| 1423392_at   | Clic4                  | chloride intracellular channel 4 (mitochondrial)                                                    | No Class |
| 1416656_at   | Clic1                  | chloride intracellular channel 1                                                                    | No Class |
| 1425951_a_at | Clec4n                 | C-type lectin domain family 4, member n                                                             | No Class |
| 1429954_at   | Clec4a3                | C-type lectin domain family 4, member a3                                                            | No Class |
| 1425407_s_at | Clec4a2 /// Clec4b1    | C-type lectin domain family 4, member a2 /// C-type lectin domain family 4, member b1               | No Class |
| 1425406_at   | Clec4a2                | C-type lectin domain family 4, member a2                                                            | No Class |
| 1422013_at   | Clec4a2                | C-type lectin domain family 4, member a2                                                            | No Class |
| 1449466_at   | Clec3b                 | C-type lectin domain family 3, member b                                                             | No Class |
| 1458415_at   | Clec2e                 | C-type lectin domain family 2, member e                                                             | No Class |
| 1421182_at   | Clec1b                 | C-type lectin domain family 1, member b                                                             | No Class |

|              |                        |                                                                                   |          |
|--------------|------------------------|-----------------------------------------------------------------------------------|----------|
| 1417231_at   | Cldn2                  | claudin 2                                                                         | No Class |
| 1425445_a_at | Cldn18                 | claudin 18                                                                        | No Class |
| 1438366_x_at | Clcn3                  | chloride channel 3                                                                | No Class |
| 1433486_at   | Clcn3                  | chloride channel 3                                                                | No Class |
| 1416610_a_at | Clcn3                  | chloride channel 3                                                                | No Class |
| 1449248_at   | Clcn2                  | chloride channel 2                                                                | No Class |
| 1450262_at   | Clcf1                  | cardiotrophin-like cytokine factor 1                                              | No Class |
| 1437271_at   | Clcf1                  | cardiotrophin-like cytokine factor 1                                              | No Class |
| 1437270_a_at | Clcf1                  | cardiotrophin-like cytokine factor 1                                              | No Class |
| 1439727_at   | Clca6                  | chloride channel calcium activated 6                                              | No Class |
| 1416306_at   | Clca3                  | chloride channel calcium activated 3                                              | No Class |
| 1460259_s_at | Clca1 /// Clca2        | chloride channel calcium activated 1 /// chloride channel calcium activated 2     | No Class |
| 1417853_at   | Clca1                  | chloride channel calcium activated 1                                              | No Class |
| 1417852_x_at | Clca1                  | chloride channel calcium activated 1                                              | No Class |
| 1417457_at   | Cks2                   | CDC28 protein kinase regulatory subunit 2                                         | No Class |
| 1451374_x_at | Cklf                   | chemokine-like factor                                                             | No Class |
| 1425860_x_at | Cklf                   | chemokine-like factor                                                             | No Class |
| 1425769_x_at | Cklf                   | chemokine-like factor                                                             | No Class |
| 1424495_a_at | Cklf                   | chemokine-like factor                                                             | No Class |
| 1434748_at   | Ckap2                  | cytoskeleton associated protein 2                                                 | No Class |
| 1425400_a_at | Cited4                 | Cbp/p300-interacting transactivator, with Glu/Asp-rich carboxy-terminal domain, 4 | No Class |
| 1455609_at   | Cit                    | citron                                                                            | No Class |
| 1422852_at   | Cib2                   | calcium and integrin binding family member 2                                      | No Class |
| 1448140_at   | Ciapin1                | cytokine induced apoptosis inhibitor 1                                            | No Class |
| 1415910_s_at | Ciapin1                | cytokine induced apoptosis inhibitor 1                                            | No Class |
| 1446402_at   | Churc1                 | Churchill domain containing 1                                                     | No Class |
| 1434316_at   | Chsy1 /// LOC100047167 | chondroitin sulfate synthase 1 /// similar to mKIAA0990 protein                   | No Class |
| 1453393_a_at | Chst4                  | carbohydrate (chondroitin 6/keratan) sulfotransferase 4                           | No Class |
| 1422758_at   | Chst2                  | carbohydrate sulfotransferase 2                                                   | No Class |
| 1452092_at   | Chst15                 | carbohydrate (N-acetylgalactosamine 4-sulfate 6-O) sulfotransferase 15            | No Class |
| 1426514_at   | Chst15                 | carbohydrate (N-acetylgalactosamine 4-sulfate 6-O) sulfotransferase 15            | No Class |
| 1453462_at   | Chst13                 | carbohydrate (chondroitin 4) sulfotransferase 13                                  | No Class |
| 1420682_at   | Chrb1                  | cholinergic receptor, nicotinic, beta polypeptide 1 (muscle)                      | No Class |
| 1439611_at   | Chrm1                  | cholinergic receptor, muscarinic 1, CNS                                           | No Class |
| 1455901_at   | Chpt1                  | choline phosphotransferase 1                                                      | No Class |
| 1426146_a_at | Chpt1                  | choline phosphotransferase 1                                                      | No Class |
| 1420545_a_at | Chn1                   | chimerin (chimaerin) 1                                                            | No Class |
| 1451098_at   | Chmp1a                 | chromatin modifying protein 1A                                                    | No Class |
| 1453582_at   | Chka                   | choline kinase alpha                                                              | No Class |
| 1442277_at   | Chka                   | choline kinase alpha                                                              | No Class |
| 1415885_at   | Chgb                   | chromogranin B                                                                    | No Class |
| 1449708_s_at | Chek1                  | checkpoint kinase 1 homolog (S. pombe)                                            | No Class |
| 1439208_at   | Chek1                  | checkpoint kinase 1 homolog (S. pombe)                                            | No Class |
| 1427384_at   | Chd6                   | chromodomain helicase DNA binding protein 6                                       | No Class |
| 1452991_at   | Chd2                   | chromodomain helicase DNA binding protein 2                                       | No Class |
| 1451505_at   | Chchd5                 | coiled-coil-helix-coiled-coil-helix domain containing 5                           | No Class |
| 1424851_at   | Chchd5                 | coiled-coil-helix-coiled-coil-helix domain containing 5                           | No Class |
| 1416938_at   | Chchd1                 | coiled-coil-helix-coiled-coil-helix domain containing 1                           | No Class |
| 1430850_x_at | Cgrrf1                 | cell growth regulator with ring finger domain 1                                   | No Class |
| 1430849_a_at | Cgrrf1                 | cell growth regulator with ring finger domain 1                                   | No Class |
| 1420579_s_at | Cftr                   | cystic fibrosis transmembrane conductance regulator homolog                       | No Class |
| 1450876_at   | Cfh /// LOC100048018   | complement component factor h /// similar to complement component factor H        | No Class |
| 1423153_x_at | Cfh /// LOC100048018   | complement component factor h /// similar to complement component factor H        | No Class |
| 1421524_at   | Cfc1                   | cripto, FRL-1, cryptic family 1                                                   | No Class |
| 1436617_at   | Cetn4                  | centrin 4                                                                         | No Class |
| 1417239_at   | Cetn3                  | centrin 3                                                                         | No Class |
| 1453881_x_at | Cetn1                  | centrin 1                                                                         | No Class |



|              |                           |                                                                                                             |          |
|--------------|---------------------------|-------------------------------------------------------------------------------------------------------------|----------|
| 1449081_at   | Ces3                      | carboxylesterase 3                                                                                          | No Class |
| 1435371_x_at | Ces3                      | carboxylesterase 3                                                                                          | No Class |
| 1435370_a_at | Ces3                      | carboxylesterase 3                                                                                          | No Class |
| 1456121_at   | Cep97                     | centrosomal protein 97                                                                                      | No Class |
| 1454945_at   | Cep97                     | centrosomal protein 97                                                                                      | No Class |
| 1429670_a_at | Cep97                     | centrosomal protein 97                                                                                      | No Class |
| 1436352_at   | Cep78                     | centrosomal protein 78                                                                                      | No Class |
| 1435779_at   | Cep110                    | centrosomal protein 110                                                                                     | No Class |
| 1429095_at   | Cenpp                     | centromere protein P                                                                                        | No Class |
| 1418542_s_at | Cenpo                     | centromere protein O                                                                                        | No Class |
| 1418541_at   | Cenpo                     | centromere protein O                                                                                        | No Class |
| 1457001_at   | Cenpk                     | centromere protein K                                                                                        | No Class |
| 1418264_at   | Cenpk                     | centromere protein K                                                                                        | No Class |
| 1439040_at   | Cenpe                     | centromere protein E                                                                                        | No Class |
| 1451235_at   | Cend1                     | cell cycle exit and neuronal differentiation 1                                                              | No Class |
| 1451154_a_at | Celf2                     | CUGBP, Elav-like family member 2                                                                            | No Class |
| 1450069_a_at | Celf2                     | CUGBP, Elav-like family member 2                                                                            | No Class |
| 1423895_a_at | Celf2                     | CUGBP, Elav-like family member 2                                                                            | No Class |
| 1420497_a_at | Cebpz                     | CCAAT/enhancer binding protein zeta                                                                         | No Class |
| 1430383_at   | Ceacam20 /// LOC100047640 | carcinoembryonic antigen-related cell adhesion molecule 20 /// similar to CEA-related cell adhesion molecul | No Class |
| 1436565_at   | Ceacam10                  | carcinoembryonic antigen-related cell adhesion molecule 10                                                  | No Class |
| 1425675_s_at | Ceacam1                   | carcinoembryonic antigen-related cell adhesion molecule 1                                                   | No Class |
| 1422075_at   | Cdx2                      | caudal type homeobox 2                                                                                      | No Class |
| 1424144_at   | Cdt1                      | chromatin licensing and DNA replication factor 1                                                            | No Class |
| 1424143_a_at | Cdt1                      | chromatin licensing and DNA replication factor 1                                                            | No Class |
| 1459911_at   | Cdr2l                     | cerebellar degeneration-related protein 2-like                                                              | No Class |
| 1445027_at   | Cdr2l                     | cerebellar degeneration-related protein 2-like                                                              | No Class |
| 1430574_at   | Cdkn3                     | cyclin-dependent kinase inhibitor 3                                                                         | No Class |
| 1416253_at   | Cdkn2d /// Gm4694         | cyclin-dependent kinase inhibitor 2D (p19, inhibits CDK4) /// predicted gene 4694                           | No Class |
| 1430039_at   | Cdkal1                    | CDK5 regulatory subunit associated protein 1-like 1                                                         | No Class |
| 1443976_at   | Cdk5rap2                  | CDK5 regulatory subunit associated protein 2                                                                | No Class |
| 1434082_at   | Cdk17                     | cyclin-dependent kinase 17                                                                                  | No Class |
| 1460169_a_at | Cdk16                     | cyclin-dependent kinase 16                                                                                  | No Class |
| 1415956_a_at | Cdk16                     | cyclin-dependent kinase 16                                                                                  | No Class |
| 1453956_a_at | Cdk14                     | cyclin-dependent kinase 14                                                                                  | No Class |
| 1419250_a_at | Cdk14                     | cyclin-dependent kinase 14                                                                                  | No Class |
| 1419249_at   | Cdk14                     | cyclin-dependent kinase 14                                                                                  | No Class |
| 1438831_at   | Cdk12                     | Cyclin-dependent kinase 12                                                                                  | No Class |
| 1441255_at   | Cdh3                      | cadherin 3                                                                                                  | No Class |
| 1426970_a_at | Cdh29 /// Uba7            | cadherin-like 29 /// ubiquitin-like modifier activating enzyme 7                                            | No Class |
| 1434115_at   | Cdh13                     | cadherin 13                                                                                                 | No Class |
| 1423551_at   | Cdh13                     | cadherin 13                                                                                                 | No Class |
| 1436847_s_at | Cdca8                     | cell division cycle associated 8                                                                            | No Class |
| 1456240_x_at | Cdca4                     | cell division cycle associated 4                                                                            | No Class |
| 1423682_a_at | Cdca4                     | cell division cycle associated 4                                                                            | No Class |
| 1426002_a_at | Cdc7                      | cell division cycle 7 (S. cerevisiae)                                                                       | No Class |
| 1428092_at   | Cdc5l                     | cell division cycle 5-like (S. pombe)                                                                       | No Class |
| 1436801_x_at | Cdc42ep4                  | CDC42 effector protein (Rho GTPase binding) 4                                                               | No Class |
| 1416511_a_at | Cdc42ep4                  | CDC42 effector protein (Rho GTPase binding) 4                                                               | No Class |
| 1424376_at   | Cdc42ep1                  | CDC42 effector protein (Rho GTPase binding) 1                                                               | No Class |
| 1449574_a_at | Cdc42                     | cell division cycle 42 homolog (S. cerevisiae)                                                              | No Class |
| 1457366_at   | Cdc40                     | cell division cycle 40 homolog (yeast)                                                                      | No Class |
| 1442667_at   | Cdc40                     | cell division cycle 40 homolog (yeast)                                                                      | No Class |
| 1430205_a_at | Cdc37l1                   | cell division cycle 37 homolog (S. cerevisiae)-like 1                                                       | No Class |
| 1416819_at   | Cdc37                     | cell division cycle 37 homolog (S. cerevisiae)                                                              | No Class |
| 1433849_at   | Cdc27                     | cell division cycle 27 homolog (S. cerevisiae)                                                              | No Class |
| 1433848_at   | Cdc27                     | cell division cycle 27 homolog (S. cerevisiae)                                                              | No Class |

|              |                        |                                                           |          |
|--------------|------------------------|-----------------------------------------------------------|----------|
| 1421963_a_at | Cdc25b                 | cell division cycle 25 homolog B (S. pombe)               | No Class |
| 1439394_x_at | Cdc20                  | cell division cycle 20 homolog (S. cerevisiae)            | No Class |
| 1439377_x_at | Cdc20                  | cell division cycle 20 homolog (S. cerevisiae)            | No Class |
| 1425554_a_at | Cdc16                  | CDC16 cell division cycle 16 homolog (S. cerevisiae)      | No Class |
| 1453556_x_at | Cd99                   | CD99 antigen                                              | No Class |
| 1430514_a_at | Cd99                   | CD99 antigen                                              | No Class |
| 1428850_x_at | Cd99                   | CD99 antigen                                              | No Class |
| 1456046_at   | Cd93                   | CD93 antigen                                              | No Class |
| 1419589_at   | Cd93                   | CD93 antigen                                              | No Class |
| 1440811_x_at | Cd8a                   | CD8 antigen, alpha chain                                  | No Class |
| 1425335_at   | Cd8a                   | CD8 antigen, alpha chain                                  | No Class |
| 1420404_at   | Cd86                   | CD86 antigen                                              | No Class |
| 1416111_at   | Cd83                   | CD83 antigen                                              | No Class |
| 1459744_at   | Cd53                   | CD53 antigen                                              | No Class |
| 1448617_at   | Cd53                   | CD53 antigen                                              | No Class |
| 1460218_at   | Cd52                   | CD52 antigen                                              | No Class |
| 1422283_at   | Cd40lg                 | CD40 ligand                                               | No Class |
| 1450884_at   | Cd36                   | CD36 antigen                                              | No Class |
| 1450883_a_at | Cd36                   | CD36 antigen                                              | No Class |
| 1423166_at   | Cd36                   | CD36 antigen                                              | No Class |
| 1450513_at   | Cd33                   | CD33 antigen                                              | No Class |
| 1445292_at   | Cd300a                 | CD300A antigen                                            | No Class |
| 1435903_at   | Cd300a                 | CD300A antigen                                            | No Class |
| 1420908_at   | Cd2ap                  | CD2-associated protein                                    | No Class |
| 1420906_at   | Cd2ap                  | CD2-associated protein                                    | No Class |
| 1449131_s_at | Cd1d1                  | CD1d1 antigen                                             | No Class |
| 1449130_at   | Cd1d1                  | CD1d1 antigen                                             | No Class |
| 1419144_at   | Cd163                  | CD163 antigen                                             | No Class |
| 1430034_at   | Cct4                   | chaperonin containing Tcp1, subunit 4 (delta)             | No Class |
| 1416024_x_at | Cct3                   | chaperonin containing Tcp1, subunit 3 (gamma)             | No Class |
| 1419610_at   | Ccr1                   | chemokine (C-C motif) receptor 1                          | No Class |
| 1453399_at   | Ccnt2                  | cyclin T2                                                 | No Class |
| 1419313_at   | Ccnt1 /// LOC100047121 | cyclin T1 /// similar to cyclin T1                        | No Class |
| 1453740_a_at | Ccnl2                  | cyclin L2                                                 | No Class |
| 1450017_at   | Ccng1                  | cyclin G1                                                 | No Class |
| 1450016_at   | Ccng1                  | cyclin G1                                                 | No Class |
| 1420827_a_at | Ccng1                  | cyclin G1                                                 | No Class |
| 1443807_x_at | Ccnf                   | cyclin F                                                  | No Class |
| 1422535_at   | Ccne2                  | cyclin E2                                                 | No Class |
| 1434745_at   | Ccnd2                  | cyclin D2                                                 | No Class |
| 1430127_a_at | Ccnd2                  | cyclin D2                                                 | No Class |
| 1416124_at   | Ccnd2                  | cyclin D2                                                 | No Class |
| 1416122_at   | Ccnd2                  | cyclin D2                                                 | No Class |
| 1448698_at   | Ccnd1                  | cyclin D1                                                 | No Class |
| 1417420_at   | Ccnd1                  | cyclin D1                                                 | No Class |
| 1417419_at   | Ccnd1                  | cyclin D1                                                 | No Class |
| 1456290_x_at | Ccm2                   | cerebral cavernous malformation 2 homolog (human)         | No Class |
| 1434649_at   | Ccm2                   | cerebral cavernous malformation 2 homolog (human)         | No Class |
| 1434648_a_at | Ccm2                   | cerebral cavernous malformation 2 homolog (human)         | No Class |
| 1419188_s_at | Ccl27a /// Gm13306     | chemokine (C-C motif) ligand 27A /// predicted gene 13306 | No Class |
| 1434962_x_at | Ccl27a                 | chemokine (C-C motif) ligand 27A                          | No Class |
| 1430375_a_at | Ccl27a                 | chemokine (C-C motif) ligand 27A                          | No Class |
| 1418777_at   | Ccl25                  | chemokine (C-C motif) ligand 25                           | No Class |
| 1450488_at   | Ccl24                  | chemokine (C-C motif) ligand 24                           | No Class |
| 1449277_at   | Ccl19                  | chemokine (C-C motif) ligand 19                           | No Class |
| 1419473_a_at | Cck                    | cholecystokinin                                           | No Class |
| 1424971_at   | Ccdc99                 | coiled-coil domain containing 99                          | No Class |

|              |                         |                                                                                  |          |
|--------------|-------------------------|----------------------------------------------------------------------------------|----------|
| 1453605_s_at | Ccdc91                  | coiled-coil domain containing 91                                                 | No Class |
| 1449083_at   | Ccdc91                  | coiled-coil domain containing 91                                                 | No Class |
| 1418459_at   | Ccdc91                  | coiled-coil domain containing 91                                                 | No Class |
| 1453732_at   | Ccdc90a                 | coiled-coil domain containing 90A                                                | No Class |
| 1446847_at   | Ccdc88c                 | coiled-coil domain containing 88C                                                | No Class |
| 1454197_a_at | Ccdc86                  | coiled-coil domain containing 86                                                 | No Class |
| 1452414_s_at | Ccdc86                  | coiled-coil domain containing 86                                                 | No Class |
| 1435346_at   | Ccdc82                  | coiled-coil domain containing 82                                                 | No Class |
| 1453823_a_at | Ccdc76                  | coiled-coil domain containing 76                                                 | No Class |
| 1449487_at   | Ccdc70                  | coiled-coil domain containing 70                                                 | No Class |
| 1419985_s_at | Ccdc69                  | coiled-coil domain containing 69                                                 | No Class |
| 1443920_at   | Ccdc66                  | coiled-coil domain containing 66                                                 | No Class |
| 1451578_at   | Ccdc65                  | coiled-coil domain containing 65                                                 | No Class |
| 1437090_at   | Ccdc63 /// LOC100047368 | coiled-coil domain containing 63 /// similar to coiled-coil domain containing 63 | No Class |
| 1459159_a_at | Ccdc6                   | coiled-coil domain containing 6                                                  | No Class |
| 1440260_at   | Ccdc58                  | coiled-coil domain containing 58                                                 | No Class |
| 1423840_at   | Ccdc56                  | coiled-coil domain containing 56                                                 | No Class |
| 1457628_at   | Ccdc53                  | coiled-coil domain containing 53                                                 | No Class |
| 1427030_at   | Ccdc52                  | coiled-coil domain containing 52                                                 | No Class |
| 1431072_a_at | Ccdc50                  | coiled-coil domain containing 50                                                 | No Class |
| 1420522_at   | Ccdc50                  | coiled-coil domain containing 50                                                 | No Class |
| 1436572_at   | Ccdc45                  | coiled-coil domain containing 45                                                 | No Class |
| 1453758_at   | Ccdc34                  | coiled-coil domain containing 34                                                 | No Class |
| 1430888_at   | Ccdc33                  | coiled-coil domain containing 33                                                 | No Class |
| 1430190_at   | Ccdc30                  | coiled-coil domain containing 30                                                 | No Class |
| 1445787_at   | Ccdc162                 | coiled-coil domain containing 162                                                | No Class |
| 1451178_at   | Ccdc142 /// Mrpl53      | coiled-coil domain containing 142 /// mitochondrial ribosomal protein L53        | No Class |
| 1460125_at   | Ccdc141                 | coiled-coil domain containing 141                                                | No Class |
| 1432094_a_at | Ccdc132                 | coiled-coil domain containing 132                                                | No Class |
| 1428605_at   | Ccdc124                 | coiled-coil domain containing 124                                                | No Class |
| 1451442_at   | Ccdc104                 | coiled-coil domain containing 104                                                | No Class |
| 1452678_a_at | Ccbl1                   | cysteine conjugate-beta lyase 1                                                  | No Class |
| 1446302_at   | Ccbl1                   | Cysteine conjugate-beta lyase 1                                                  | No Class |
| 1438348_x_at | Ccbl1                   | cysteine conjugate-beta lyase 1                                                  | No Class |
| 1428151_x_at | Ccbl1                   | cysteine conjugate-beta lyase 1                                                  | No Class |
| 1429290_at   | Cbx6                    | chromobox homolog 6                                                              | No Class |
| 1424407_s_at | Cbx6                    | chromobox homolog 6                                                              | No Class |
| 1448504_a_at | Cbx3 /// LOC633016      | chromobox homolog 3 (Drosophila HP1 gamma) /// similar to chromobox homolog 3    | No Class |
| 1439421_x_at | Cbx3 /// LOC633016      | chromobox homolog 3 (Drosophila HP1 gamma) /// similar to chromobox homolog 3    | No Class |
| 1418509_at   | Cbr2                    | carbonyl reductase 2                                                             | No Class |
| 1458469_at   | Cblb                    | Casitas B-lineage lymphoma b                                                     | No Class |
| 1440964_s_at | Cbfa2t3                 | core-binding factor, runt domain, alpha subunit 2, translocated to, 3 (human)    | No Class |
| 1438705_at   | Cbfa2t3                 | core-binding factor, runt domain, alpha subunit 2, translocated to, 3 (human)    | No Class |
| 1418582_at   | Cbfa2t3                 | core-binding factor, runt domain, alpha subunit 2, translocated to, 3 (human)    | No Class |
| 1451207_at   | Cbara1                  | calcium binding atopy-related autoantigen 1                                      | No Class |
| 1443340_at   | Cbara1                  | calcium binding atopy-related autoantigen 1                                      | No Class |
| 1457816_at   | Casp9                   | caspase 9                                                                        | No Class |
| 1449217_at   | Casp8ap2                | caspase 8 associated protein 2                                                   | No Class |
| 1426062_a_at | Casp7                   | caspase 7                                                                        | No Class |
| 1458715_at   | Casp6                   | Caspase 6                                                                        | No Class |
| 1415995_at   | Casp6                   | caspase 6                                                                        | No Class |
| 1443787_x_at | Casp14                  | caspase 14                                                                       | No Class |
| 1427692_a_at | Cask                    | calcium/calmodulin-dependent serine protein kinase (MAGUK family)                | No Class |
| 1422519_at   | Cask                    | calcium/calmodulin-dependent serine protein kinase (MAGUK family)                | No Class |
| 1438833_at   | Casc5                   | cancer susceptibility candidate 5                                                | No Class |
| 1430193_at   | Casc5                   | cancer susceptibility candidate 5                                                | No Class |
| 1440248_at   | Casc4                   | cancer susceptibility candidate 4                                                | No Class |

|              |                         |                                                                                                        |          |
|--------------|-------------------------|--------------------------------------------------------------------------------------------------------|----------|
| 1433779_at   | Casc4                   | cancer susceptibility candidate 4                                                                      | No Class |
| 1452394_at   | Cars                    | cysteinyl-tRNA synthetase                                                                              | No Class |
| 1427013_at   | Car9                    | carbonic anhydrase 9                                                                                   | No Class |
| 1424958_at   | Car8                    | carbonic anhydrase 8                                                                                   | No Class |
| 1419525_at   | Car5a                   | carbonic anhydrase 5a, mitochondrial                                                                   | No Class |
| 1460256_at   | Car3                    | carbonic anhydrase 3                                                                                   | No Class |
| 1449434_at   | Car3                    | carbonic anhydrase 3                                                                                   | No Class |
| 1448752_at   | Car2                    | carbonic anhydrase 2                                                                                   | No Class |
| 1453960_a_at | Capzb                   | capping protein (actin filament) muscle Z-line, beta                                                   | No Class |
| 1417259_a_at | Capzb                   | capping protein (actin filament) muscle Z-line, beta                                                   | No Class |
| 1423058_at   | Capza2                  | capping protein (actin filament) muscle Z-line, alpha 2                                                | No Class |
| 1423057_at   | Capza2                  | capping protein (actin filament) muscle Z-line, alpha 2                                                | No Class |
| 1429891_at   | Capsl                   | calcyphosine-like                                                                                      | No Class |
| 1416462_at   | Caprin1                 | cell cycle associated protein 1                                                                        | No Class |
| 1416461_at   | Caprin1                 | cell cycle associated protein 1                                                                        | No Class |
| 1422876_at   | Capn9 /// LOC639715     | calpain 9 /// similar to calpain 9 (nCL-4)                                                             | No Class |
| 1423098_at   | Capn7                   | calpain 7                                                                                              | No Class |
| 1450429_at   | Capn6                   | calpain 6                                                                                              | No Class |
| 1421952_at   | Capn6                   | calpain 6                                                                                              | No Class |
| 1450355_a_at | Capg                    | capping protein (actin filament), gelsolin-like                                                        | No Class |
| 1447803_x_at | Capg                    | capping protein (actin filament), gelsolin-like                                                        | No Class |
| 1450910_at   | Cap2                    | CAP, adenylate cyclase-associated protein, 2 (yeast)                                                   | No Class |
| 1453455_at   | Camta1                  | calmodulin binding transcription activator 1                                                           | No Class |
| 1439843_at   | Camk4                   | calcium/calmodulin-dependent protein kinase IV                                                         | No Class |
| 1426167_a_at | Camk4                   | calcium/calmodulin-dependent protein kinase IV                                                         | No Class |
| 1456609_at   | Camk2n1                 | calcium/calmodulin-dependent protein kinase II inhibitor 1                                             | No Class |
| 1423942_a_at | Camk2g /// LOC100045547 | calcium/calmodulin-dependent protein kinase II gamma /// similar to Calcium/calmodulin-dependent prote | No Class |
| 1441734_at   | Camk2a                  | calcium/calmodulin-dependent protein kinase II alpha                                                   | No Class |
| 1417605_s_at | Camk1                   | calcium/calmodulin-dependent protein kinase I                                                          | No Class |
| 1417604_at   | Camk1                   | calcium/calmodulin-dependent protein kinase I                                                          | No Class |
| 1456170_x_at | Calr                    | calreticulin                                                                                           | No Class |
| 1433806_x_at | Calr                    | calreticulin                                                                                           | No Class |
| 1417606_a_at | Calr                    | calreticulin                                                                                           | No Class |
| 1455571_x_at | Calm1                   | calmodulin 1                                                                                           | No Class |
| 1454611_a_at | Calm1                   | calmodulin 1                                                                                           | No Class |
| 1417365_a_at | Calm1                   | calmodulin 1                                                                                           | No Class |
| 1451499_at   | Cadps2                  | Ca <sup>2+</sup> -dependent activator protein for secretion 2                                          | No Class |
| 1426263_at   | Cadm4                   | cell adhesion molecule 4                                                                               | No Class |
| 1417378_at   | Cadm1                   | cell adhesion molecule 1                                                                               | No Class |
| 1417377_at   | Cadm1                   | cell adhesion molecule 1                                                                               | No Class |
| 1417376_a_at | Cadm1                   | cell adhesion molecule 1                                                                               | No Class |
| 1452829_at   | Cad                     | carbamoyl-phosphate synthetase 2, aspartate transcarbamylase, and dihydroorotase                       | No Class |
| 1459579_at   | Cacng8                  | calcium channel, voltage-dependent, gamma subunit 8                                                    | No Class |
| 1425730_at   | Cacng6                  | calcium channel, voltage-dependent, gamma subunit 6                                                    | No Class |
| 1453363_at   | Cacng2                  | calcium channel, voltage-dependent, gamma subunit 2                                                    | No Class |
| 1440210_at   | Cacng2                  | calcium channel, voltage-dependent, gamma subunit 2                                                    | No Class |
| 1451834_at   | Cacnb1                  | calcium channel, voltage-dependent, beta 1 subunit                                                     | No Class |
| 1425777_at   | Cacnb1                  | calcium channel, voltage-dependent, beta 1 subunit                                                     | No Class |
| 1457703_at   | Cacna2d4                | calcium channel, voltage-dependent, alpha 2/delta subunit 4                                            | No Class |
| 1441084_at   | Cacna2d4                | calcium channel, voltage-dependent, alpha 2/delta subunit 4                                            | No Class |
| 1449999_a_at | Cacna2d1                | calcium channel, voltage-dependent, alpha2/delta subunit 1                                             | No Class |
| 1433643_at   | Cacna2d1                | calcium channel, voltage-dependent, alpha2/delta subunit 1                                             | No Class |
| 1423365_at   | Cacna1g                 | calcium channel, voltage-dependent, T type, alpha 1G subunit                                           | No Class |
| 1421297_a_at | Cacna1c                 | calcium channel, voltage-dependent, L type, alpha 1C subunit                                           | No Class |
| 1425812_a_at | Cacna1b                 | calcium channel, voltage-dependent, N type, alpha 1B subunit                                           | No Class |
| 1441938_x_at | Cables1                 | CDK5 and Abl enzyme substrate 1                                                                        | No Class |
| 1422477_at   | Cables1                 | CDK5 and Abl enzyme substrate 1                                                                        | No Class |

|              |                      |                                                                                              |          |
|--------------|----------------------|----------------------------------------------------------------------------------------------|----------|
| 1446539_at   | Cab39I               | Calcium binding protein 39-like                                                              | No Class |
| 1441600_at   | C920021A13           | hypothetical protein C920021A13                                                              | No Class |
| 1442624_at   | C920008N22Rik        | RIKEN cDNA C920008N22 gene                                                                   | No Class |
| 1446033_at   | C87882               | expressed sequence C87882                                                                    | No Class |
| 1443478_at   | C86695               | expressed sequence C86695                                                                    | No Class |
| 1454618_at   | C86187               | expressed sequence C86187                                                                    | No Class |
| 1433913_at   | C80913               | expressed sequence C80913                                                                    | No Class |
| 1440513_at   | C80258               | expressed sequence C80258                                                                    | No Class |
| 1458768_at   | C79946               | expressed sequence C79946                                                                    | No Class |
| 1458935_at   | C79744               | expressed sequence C79744                                                                    | No Class |
| 1443416_at   | C79741               | expressed sequence C79741                                                                    | No Class |
| 1445005_at   | C79491               | expressed sequence C79491                                                                    | No Class |
| 1458374_at   | C79407               | expressed sequence C79407                                                                    | No Class |
| 1458786_at   | C79250               | expressed sequence C79250                                                                    | No Class |
| 1442494_at   | C79242               | expressed sequence C79242                                                                    | No Class |
| 1445905_at   | C79206               | expressed sequence C79206                                                                    | No Class |
| 1433476_at   | C78339               | expressed sequence C78339                                                                    | No Class |
| 1442621_at   | C77798               | expressed sequence C77798                                                                    | No Class |
| 1444677_at   | C77673               | expressed sequence C77673                                                                    | No Class |
| 1444999_at   | C77651               | expressed sequence C77651                                                                    | No Class |
| 1444445_at   | C77648               | expressed sequence C77648                                                                    | No Class |
| 1444972_at   | C77626               | expressed sequence C77626                                                                    | No Class |
| 1449654_s_at | C77545               | expressed sequence C77545                                                                    | No Class |
| 1433775_at   | C77080               | expressed sequence C77080                                                                    | No Class |
| 1443409_at   | C76434               | expressed sequence C76434                                                                    | No Class |
| 1436168_at   | C730029A08Rik        | RIKEN cDNA C730029A08 gene                                                                   | No Class |
| 1434687_at   | C730026J16           | hypothetical protein C730026J16                                                              | No Class |
| 1446298_at   | C630016I17Rik        | RIKEN cDNA C630016I17 gene                                                                   | No Class |
| 1447510_at   | C530014P21Rik        | RIKEN cDNA C530014P21 gene                                                                   | No Class |
| 1443944_at   | C530005A16Rik        | RIKEN cDNA C530005A16 gene                                                                   | No Class |
| 1418037_at   | C4bp                 | complement component 4 binding protein                                                       | No Class |
| 1433352_at   | C430049A07Rik        | RIKEN cDNA C430049A07 gene                                                                   | No Class |
| 1457508_at   | C430003N24Rik        | RIKEN cDNA C430003N24 gene                                                                   | No Class |
| 1449699_s_at | C330027C09Rik        | RIKEN cDNA C330027C09 gene                                                                   | No Class |
| 1434218_at   | C330019G07Rik        | RIKEN cDNA C330019G07 gene                                                                   | No Class |
| 1433988_s_at | C230098O21Rik        | RIKEN cDNA C230098O21 gene                                                                   | No Class |
| 1436709_at   | C230096C10Rik        | RIKEN cDNA C230096C10 gene                                                                   | No Class |
| 1457656_s_at | C230085N15Rik        | RIKEN cDNA C230085N15 gene                                                                   | No Class |
| 1440842_at   | C230085N15Rik        | RIKEN cDNA C230085N15 gene                                                                   | No Class |
| 1446877_at   | C230014O12Rik        | RIKEN cDNA C230014O12 gene                                                                   | No Class |
| 1457664_x_at | C2                   | complement component 2 (within H-2S)                                                         | No Class |
| 1441912_x_at | C2                   | complement component 2 (within H-2S)                                                         | No Class |
| 1416051_at   | C2                   | complement component 2 (within H-2S)                                                         | No Class |
| 1424041_s_at | C1s /// LOC100044326 | complement component 1, s subcomponent /// similar to Complement component 1, s subcomponent | No Class |
| 1456437_x_at | C1ra /// C1rb        | complement component 1, r subcomponent A /// complement component 1, r subcomponent B        | No Class |
| 1417009_at   | C1ra                 | complement component 1, r subcomponent A                                                     | No Class |
| 1431079_at   | C1qtnf2              | C1q and tumor necrosis factor related protein 2                                              | No Class |
| 1440317_at   | C130068B02Rik        | RIKEN cDNA C130068B02 gene                                                                   | No Class |
| 1457334_at   | C130057M05Rik        | RIKEN cDNA C130057M05 gene                                                                   | No Class |
| 1441516_a_at | C130050O18Rik        | RIKEN cDNA C130050O18 gene                                                                   | No Class |
| 1457464_at   | C130015C19           | hypothetical LOC403342                                                                       | No Class |
| 1456564_at   | C030046I01Rik        | RIKEN cDNA C030046I01 gene                                                                   | No Class |
| 1438905_x_at | C030046I01Rik        | RIKEN cDNA C030046I01 gene                                                                   | No Class |
| 1431023_at   | C030046E11Rik        | RIKEN cDNA C030046E11 gene                                                                   | No Class |
| 1442175_at   | C030027H14Rik        | RIKEN cDNA C030027H14 gene                                                                   | No Class |
| 1444183_at   | C030013C21Rik        | RIKEN cDNA C030013C21 gene                                                                   | No Class |
| 1433235_at   | C030011I16Rik        | RIKEN cDNA C030011I16 gene                                                                   | No Class |

|              |        |                                                                                              |          |
|--------------|--------|----------------------------------------------------------------------------------------------|----------|
| 1450845_a_at | Bzw1   | basic leucine zipper and W2 domains 1                                                        | No Class |
| 1423041_a_at | Bzw1   | basic leucine zipper and W2 domains 1                                                        | No Class |
| 1423040_at   | Bzw1   | basic leucine zipper and W2 domains 1                                                        | No Class |
| 1450742_at   | Bysl   | bystin-like                                                                                  | No Class |
| 1459918_at   | Bub3   | budding uninhibited by benzimidazoles 3 homolog ( <i>S. cerevisiae</i> )                     | No Class |
| 1416961_at   | Bub1b  | budding uninhibited by benzimidazoles 1 homolog, beta ( <i>S. cerevisiae</i> )               | No Class |
| 1451223_a_at | Btf3l4 | basic transcription factor 3-like 4                                                          | No Class |
| 1424074_at   | Btf3l4 | basic transcription factor 3-like 4                                                          | No Class |
| 1432910_at   | Btbd7  | BTB (POZ) domain containing 7                                                                | No Class |
| 1459839_x_at | Btbd11 | BTB (POZ) domain containing 11                                                               | No Class |
| 1459838_s_at | Btbd11 | BTB (POZ) domain containing 11                                                               | No Class |
| 1428377_at   | Btbd11 | BTB (POZ) domain containing 11                                                               | No Class |
| 1452321_at   | Brwd1  | bromodomain and WD repeat domain containing 1                                                | No Class |
| 1427322_at   | Brwd1  | bromodomain and WD repeat domain containing 1                                                | No Class |
| 1435225_s_at | Brpf3  | bromodomain and PHD finger containing, 3                                                     | No Class |
| 1419046_at   | Brp16  | brain protein 16                                                                             | No Class |
| 1460443_at   | Brms1l | breast cancer metastasis-suppressor 1-like                                                   | No Class |
| 1452850_s_at | Brms1l | breast cancer metastasis-suppressor 1-like                                                   | No Class |
| 1423841_at   | Brix1  | BRX1, biogenesis of ribosomes, homolog ( <i>S. cerevisiae</i> )                              | No Class |
| 1435502_a_at | Brdt   | bromodomain, testis-specific                                                                 | No Class |
| 1416739_a_at | Brap   | BRCA1 associated protein                                                                     | No Class |
| 1445786_at   | Braf   | Braf transforming gene                                                                       | No Class |
| 1442749_at   | Braf   | Braf transforming gene                                                                       | No Class |
| 1456615_a_at | Bptf   | bromodomain PHD finger transcription factor                                                  | No Class |
| 1427311_at   | Bptf   | bromodomain PHD finger transcription factor                                                  | No Class |
| 1427310_at   | Bptf   | bromodomain PHD finger transcription factor                                                  | No Class |
| 1434545_x_at | Bola2  | bolA-like 2 ( <i>E. coli</i> )                                                               | No Class |
| 1434544_at   | Bola2  | bolA-like 2 ( <i>E. coli</i> )                                                               | No Class |
| 1427517_at   | Boc    | biregional cell adhesion molecule-related/down-regulated by oncogenes (Cdon) binding protein | No Class |
| 1448525_a_at | Bnip3l | BCL2/adenovirus E1B interacting protein 3-like                                               | No Class |
| 1416923_a_at | Bnip3l | BCL2/adenovirus E1B interacting protein 3-like                                               | No Class |
| 1416922_a_at | Bnip3l | BCL2/adenovirus E1B interacting protein 3-like                                               | No Class |
| 1422470_at   | Bnip3  | BCL2/adenovirus E1B interacting protein 3                                                    | No Class |
| 1454441_at   | Bnip2  | BCL2/adenovirus E1B interacting protein 2                                                    | No Class |
| 1453993_a_at | Bnip2  | BCL2/adenovirus E1B interacting protein 2                                                    | No Class |
| 1433025_x_at | Bnip2  | BCL2/adenovirus E1B interacting protein 2                                                    | No Class |
| 1422491_a_at | Bnip2  | BCL2/adenovirus E1B interacting protein 2                                                    | No Class |
| 1444646_at   | Bnc2   | basonuclin 2                                                                                 | No Class |
| 1438861_at   | Bnc2   | basonuclin 2                                                                                 | No Class |
| 1447679_s_at | Bms1   | BMS1 homolog, ribosome assembly protein (yeast)                                              | No Class |
| 1425494_s_at | Bmpr1a | bone morphogenetic protein receptor, type 1A                                                 | No Class |
| 1425493_at   | Bmpr1a | bone morphogenetic protein receptor, type 1A                                                 | No Class |
| 1425492_at   | Bmpr1a | bone morphogenetic protein receptor, type 1A                                                 | No Class |
| 1425491_at   | Bmpr1a | bone morphogenetic protein receptor, type 1A                                                 | No Class |
| 1450342_at   | Bmp8b  | bone morphogenetic protein 8b                                                                | No Class |
| 1450759_at   | Bmp6   | bone morphogenetic protein 6                                                                 | No Class |
| 1422912_at   | Bmp4   | bone morphogenetic protein 4                                                                 | No Class |
| 1427457_a_at | Bmp1   | bone morphogenetic protein 1                                                                 | No Class |
| 1428580_at   | Blvra  | biliverdin reductase A                                                                       | No Class |
| 1419562_at   | Birc6  | baculoviral IAP repeat-containing 6                                                          | No Class |
| 1425223_at   | Birc3  | baculoviral IAP repeat-containing 3                                                          | No Class |
| 1425532_a_at | Bin1   | bridging integrator 1                                                                        | No Class |
| 1420362_a_at | Bik    | BCL2-interacting killer                                                                      | No Class |
| 1450733_at   | Bicd2  | bicaudal D homolog 2 ( <i>Drosophila</i> )                                                   | No Class |
| 1451684_a_at | Bicd1  | bicaudal D homolog 1 ( <i>Drosophila</i> )                                                   | No Class |
| 1438701_at   | Bicd1  | bicaudal D homolog 1 ( <i>Drosophila</i> )                                                   | No Class |
| 1437548_at   | Bicd1  | bicaudal D homolog 1 ( <i>Drosophila</i> )                                                   | No Class |

|              |                                       |                                                                                                                                                      |          |
|--------------|---------------------------------------|------------------------------------------------------------------------------------------------------------------------------------------------------|----------|
| 1441137_at   | Bicc1                                 | bicaudal C homolog 1 (Drosophila)                                                                                                                    | No Class |
| 1436029_at   | Bicc1                                 | bicaudal C homolog 1 (Drosophila)                                                                                                                    | No Class |
| 1423484_at   | Bicc1                                 | bicaudal C homolog 1 (Drosophila)                                                                                                                    | No Class |
| 1453570_x_at | Bet1l                                 | blocked early in transport 1 homolog (S. cerevisiae)-like                                                                                            | No Class |
| 1430549_at   | Bet1l                                 | blocked early in transport 1 homolog (S. cerevisiae)-like                                                                                            | No Class |
| 1426372_a_at | Bet1l                                 | blocked early in transport 1 homolog (S. cerevisiae)-like                                                                                            | No Class |
| 1460320_at   | Becn1                                 | beclin 1, autophagy related                                                                                                                          | No Class |
| 1422169_a_at | Bdnf                                  | brain derived neurotrophic factor                                                                                                                    | No Class |
| 1429438_at   | Bcor                                  | BCL6 interacting corepressor                                                                                                                         | No Class |
| 1428773_s_at | Bcor                                  | BCL6 interacting corepressor                                                                                                                         | No Class |
| 1421221_at   | Bco2                                  | beta-carotene oxygenase 2                                                                                                                            | No Class |
| 1443700_at   | Bcl9l                                 | B-cell CLL/lymphoma 9-like                                                                                                                           | No Class |
| 1450381_a_at | Bcl6                                  | B-cell leukemia/lymphoma 6                                                                                                                           | No Class |
| 1429347_at   | Bcl2l14                               | BCL2-like 14 (apoptosis facilitator)                                                                                                                 | No Class |
| 1424814_a_at | Bcl2l14                               | BCL2-like 14 (apoptosis facilitator)                                                                                                                 | No Class |
| 1416434_at   | Bcl2l10                               | Bcl2-like 10                                                                                                                                         | No Class |
| 1437913_at   | Bcl2a1a /// Bcl2a1b /// Bcl2a1d       | B-cell leukemia/lymphoma 2 related protein A1a /// B-cell leukemia/lymphoma 2 related protein A1b /// B-cell leukemia/lymphoma 2 related protein A1d | No Class |
| 1443837_x_at | Bcl2                                  | B-cell leukemia/lymphoma 2                                                                                                                           | No Class |
| 1440770_at   | Bcl2                                  | B-cell leukemia/lymphoma 2                                                                                                                           | No Class |
| 1457072_at   | Bcl11a                                | B-cell CLL/lymphoma 11A (zinc finger protein)                                                                                                        | No Class |
| 1456632_at   | Bcl11a                                | B-cell CLL/lymphoma 11A (zinc finger protein)                                                                                                        | No Class |
| 1426552_a_at | Bcl11a                                | B-cell CLL/lymphoma 11A (zinc finger protein)                                                                                                        | No Class |
| 1419406_a_at | Bcl11a                                | B-cell CLL/lymphoma 11A (zinc finger protein)                                                                                                        | No Class |
| 1436098_at   | Bche                                  | butyrylcholinesterase                                                                                                                                | No Class |
| 1455699_at   | Bcat1                                 | branched chain aminotransferase 1, cytosolic                                                                                                         | No Class |
| 1450871_a_at | Bcat1                                 | branched chain aminotransferase 1, cytosolic                                                                                                         | No Class |
| 1430111_a_at | Bcat1                                 | branched chain aminotransferase 1, cytosolic                                                                                                         | No Class |
| 1444632_at   | BC064078                              | cDNA sequence BC064078                                                                                                                               | No Class |
| 1435069_at   | BC064078                              | cDNA sequence BC064078                                                                                                                               | No Class |
| 1443692_at   | BC057022                              | cDNA sequence BC057022                                                                                                                               | No Class |
| 1447910_x_at | BC052688 /// LOC100046282 /// Selk    | cDNA sequence BC052688 /// similar to Selenoprotein K /// selenoprotein K                                                                            | No Class |
| 1434577_at   | BC052040                              | cDNA sequence BC052040                                                                                                                               | No Class |
| 1439948_at   | BC046401                              | cDNA sequence BC046401                                                                                                                               | No Class |
| 1435175_at   | BC034090                              | cDNA sequence BC034090                                                                                                                               | No Class |
| 1447804_x_at | BC031781                              | cDNA sequence BC031781                                                                                                                               | No Class |
| 1436151_x_at | BC031781                              | cDNA sequence BC031781                                                                                                                               | No Class |
| 1439293_at   | BC031353                              | cDNA sequence BC031353                                                                                                                               | No Class |
| 1436033_at   | BC031353                              | cDNA sequence BC031353                                                                                                                               | No Class |
| 1434711_at   | BC030867                              | cDNA sequence BC030867                                                                                                                               | No Class |
| 1434075_at   | BC030336                              | cDNA sequence BC030336                                                                                                                               | No Class |
| 1451439_at   | BC027231                              | cDNA sequence BC027231                                                                                                                               | No Class |
| 1451533_at   | BC022687                              | cDNA sequence BC022687                                                                                                                               | No Class |
| 1424940_s_at | BC022687                              | cDNA sequence BC022687                                                                                                                               | No Class |
| 1425807_at   | BC021891                              | cDNA sequence BC021891                                                                                                                               | No Class |
| 1427389_at   | BC021785                              | cDNA sequence BC021785                                                                                                                               | No Class |
| 1424757_at   | BC018242                              | cDNA sequence BC018242                                                                                                                               | No Class |
| 1423678_at   | BC017643                              | cDNA sequence BC017643                                                                                                                               | No Class |
| 1457619_at   | BC015286                              | cDNA sequence BC015286                                                                                                                               | No Class |
| 1427041_at   | BC013712                              | cDNA sequence BC013712                                                                                                                               | No Class |
| 1435628_x_at | BC005512 /// F630007L15Rik /// Gm6958 | cDNA sequence BC005512 /// RIKEN cDNA F630007L15 gene /// predicted gene 6958                                                                        | No Class |
| 1426936_at   | BC005512 /// F630007L15Rik /// Gm6958 | cDNA sequence BC005512 /// RIKEN cDNA F630007L15 gene /// predicted gene 6958                                                                        | No Class |
| 1429762_a_at | Bbs5                                  | Bardet-Biedl syndrome 5 (human)                                                                                                                      | No Class |
| 1442297_at   | BB212172                              | expressed sequence BB212172                                                                                                                          | No Class |
| 1436585_at   | BB182297                              | expressed sequence BB182297                                                                                                                          | No Class |
| 1445711_at   | BB163080                              | expressed sequence BB163080                                                                                                                          | No Class |
| 1440805_at   | Baz1b                                 | Bromodomain adjacent to zinc finger domain, 1B                                                                                                       | No Class |
| 1420975_at   | Baz1b                                 | bromodomain adjacent to zinc finger domain, 1B                                                                                                       | No Class |

|              |                        |                                                                                                        |          |
|--------------|------------------------|--------------------------------------------------------------------------------------------------------|----------|
| 1416837_at   | Bax                    | BCL2-associated X protein                                                                              | No Class |
| 1430005_a_at | Batf2                  | basic leucine zipper transcription factor, ATF-like 2                                                  | No Class |
| 1419410_at   | Batf                   | basic leucine zipper transcription factor, ATF-like                                                    | No Class |
| 1433890_a_at | Bat3                   | HLA-B-associated transcript 3                                                                          | No Class |
| 1423948_at   | Bag2                   | BCL2-associated athanogene 2                                                                           | No Class |
| 1416583_at   | Bad                    | BCL2-associated agonist of cell death                                                                  | No Class |
| 1455826_a_at | Bace1                  | beta-site APP cleaving enzyme 1                                                                        | No Class |
| 1450384_at   | Bace1                  | beta-site APP cleaving enzyme 1                                                                        | No Class |
| 1421825_at   | Bace1                  | beta-site APP cleaving enzyme 1                                                                        | No Class |
| 1421824_at   | Bace1                  | beta-site APP cleaving enzyme 1                                                                        | No Class |
| 1419002_s_at | Baat                   | bile acid-Coenzyme A: amino acid N-acyltransferase                                                     | No Class |
| 1417596_at   | B9d1                   | B9 protein domain 1                                                                                    | No Class |
| 1439311_at   | B830012L14Rik          | RIKEN cDNA B830012L14 gene                                                                             | No Class |
| 1460329_at   | B4galt6                | UDP-Gal:betaGlcNAc beta 1,4-galactosyltransferase, polypeptide 6                                       | No Class |
| 1450913_at   | B4galt6                | UDP-Gal:betaGlcNAc beta 1,4-galactosyltransferase, polypeptide 6                                       | No Class |
| 1435758_at   | B4galt6                | UDP-Gal:betaGlcNAc beta 1,4-galactosyltransferase, polypeptide 6                                       | No Class |
| 1423228_at   | B4galt6                | UDP-Gal:betaGlcNAc beta 1,4-galactosyltransferase, polypeptide 6                                       | No Class |
| 1418080_at   | B4galt2 /// Ccdc24     | UDP-Gal:betaGlcNAc beta 1,4- galactosyltransferase, polypeptide 2 /// coiled-coil domain containing 24 | No Class |
| 1448941_at   | B4galt2                | UDP-Gal:betaGlcNAc beta 1,4- galactosyltransferase, polypeptide 2                                      | No Class |
| 1421522_at   | B4galt2                | beta-1,4-N-acetyl-galactosaminyl transferase 2                                                         | No Class |
| 1439933_at   | B430316J06Rik          | RIKEN cDNA B430316J06 gene                                                                             | No Class |
| 1437514_at   | B430306N03Rik          | RIKEN cDNA B430306N03 gene                                                                             | No Class |
| 1440586_at   | B430203I24Rik          | RIKEN cDNA B430203I24 gene                                                                             | No Class |
| 1420994_at   | B3gnt5                 | UDP-GlcNAc:betaGal beta-1,3-N-acetylglucosaminyltransferase 5                                          | No Class |
| 1420993_at   | B3gnt5                 | UDP-GlcNAc:betaGal beta-1,3-N-acetylglucosaminyltransferase 5                                          | No Class |
| 1450026_a_at | B3gnt2                 | UDP-GlcNAc:betaGal beta-1,3-N-acetylglucosaminyltransferase 2                                          | No Class |
| 1420852_a_at | B3gnt2                 | UDP-GlcNAc:betaGal beta-1,3-N-acetylglucosaminyltransferase 2                                          | No Class |
| 1431219_at   | B3galt3                | beta-1,3-glucuronyltransferase 3 (glucuronosyltransferase I)                                           | No Class |
| 1435252_at   | B3galt6                | UDP-Gal:betaGal beta 1,3-galactosyltransferase, polypeptide 6                                          | No Class |
| 1428398_at   | B3galt5                | UDP-Gal:betaGlcNAc beta 1,3-galactosyltransferase, polypeptide 5                                       | No Class |
| 1428397_at   | B3galt5                | UDP-Gal:betaGlcNAc beta 1,3-galactosyltransferase, polypeptide 5                                       | No Class |
| 1450530_at   | B3galt1                | UDP-Gal:betaGlcNAc beta 1,3-galactosyltransferase, polypeptide 1                                       | No Class |
| 1441396_at   | B3galt1                | UDP-Gal:betaGlcNAc beta 1,3-galactosyltransferase, polypeptide 1                                       | No Class |
| 1422206_at   | B3galt1                | UDP-Gal:betaGlcNAc beta 1,3-galactosyltransferase, polypeptide 1                                       | No Class |
| 1454842_a_at | B3galnt2               | UDP-GalNAc:betaGlcNAc beta 1,3-galactosaminyltransferase, polypeptide 2                                | No Class |
| 1452428_a_at | B2m                    | beta-2 microglobulin                                                                                   | No Class |
| 1449289_a_at | B2m                    | beta-2 microglobulin                                                                                   | No Class |
| 1442585_at   | B230220N19Rik          | RIKEN cDNA B230220N19 gene                                                                             | No Class |
| 1453736_s_at | B230219D22Rik          | RIKEN cDNA B230219D22 gene                                                                             | No Class |
| 1446443_at   | B230213L16Rik          | RIKEN cDNA B230213L16 gene                                                                             | No Class |
| 1452370_s_at | B230208H17Rik          | RIKEN cDNA B230208H17 gene                                                                             | No Class |
| 1441897_at   | B230120H23Rik          | RIKEN cDNA B230120H23 gene                                                                             | No Class |
| 1426967_at   | Axin1 /// LOC100047927 | axin 1 /// similar to Axin                                                                             | No Class |
| 1418603_at   | Avpr1a                 | arginine vasopressin receptor 1A                                                                       | No Class |
| 1423122_at   | Avpi1                  | arginine vasopressin-induced 1                                                                         | No Class |
| 1457139_at   | Auts2                  | Autism susceptibility candidate 2                                                                      | No Class |
| 1438680_at   | Auts2                  | autism susceptibility candidate 2                                                                      | No Class |
| 1427293_a_at | Auts2                  | autism susceptibility candidate 2                                                                      | No Class |
| 1416245_at   | Aurkaip1               | aurora kinase A interacting protein 1                                                                  | No Class |
| 1448067_at   | AU042651               | expressed sequence AU042651                                                                            | No Class |
| 1440199_at   | AU042651               | expressed sequence AU042651                                                                            | No Class |
| 1443888_at   | AU023762               | expressed sequence AU023762                                                                            | No Class |
| 1458814_at   | AU022855               | expressed sequence AU022855                                                                            | No Class |
| 1459504_at   | AU022121               | expressed sequence AU022121                                                                            | No Class |
| 1447184_at   | AU021760               | expressed sequence AU021760                                                                            | No Class |
| 1457575_at   | AU021128               | expressed sequence AU021128                                                                            | No Class |
| 1446021_at   | AU018466               | expressed sequence AU018466                                                                            | No Class |



|              |                         |                                                                                                           |          |
|--------------|-------------------------|-----------------------------------------------------------------------------------------------------------|----------|
| 1455062_at   | AU017455                | expressed sequence AU017455                                                                               | No Class |
| 1441607_at   | AU015603                | expressed sequence AU015603                                                                               | No Class |
| 1457459_at   | AU014973                | expressed sequence AU014973                                                                               | No Class |
| 1458709_a_at | Atxn7l1                 | ataxin 7-like 1                                                                                           | No Class |
| 1460653_at   | Atxn2 /// LOC100047323  | ataxin 2 /// similar to ataxin 2                                                                          | No Class |
| 1419866_s_at | Atxn2 /// LOC100047323  | ataxin 2 /// similar to ataxin 2                                                                          | No Class |
| 1445624_at   | Atxn1l                  | Ataxin 1-like                                                                                             | No Class |
| 1422576_at   | Atxn10                  | ataxin 10                                                                                                 | No Class |
| 1438294_at   | Atxn1                   | ataxin 1                                                                                                  | No Class |
| 1453734_at   | Atrx                    | alpha thalassemia/mental retardation syndrome X-linked homolog (human)                                    | No Class |
| 1450051_at   | Atrx                    | alpha thalassemia/mental retardation syndrome X-linked homolog (human)                                    | No Class |
| 1433537_at   | Atrx                    | alpha thalassemia/mental retardation syndrome X-linked homolog (human)                                    | No Class |
| 1420948_s_at | Atrx                    | alpha thalassemia/mental retardation syndrome X-linked homolog (human)                                    | No Class |
| 1420947_at   | Atrx                    | alpha thalassemia/mental retardation syndrome X-linked homolog (human)                                    | No Class |
| 1420946_at   | Atrx                    | alpha thalassemia/mental retardation syndrome X-linked homolog (human)                                    | No Class |
| 1438921_at   | Atr                     | Ataxia telangiectasia and Rad3 related                                                                    | No Class |
| 1452450_at   | Atp8b2                  | ATPase, class I, type 8B, member 2                                                                        | No Class |
| 1460650_at   | Atp6v0a1                | ATPase, H+ transporting, lysosomal V0 subunit A1                                                          | No Class |
| 1417632_at   | Atp6v0a1                | ATPase, H+ transporting, lysosomal V0 subunit A1                                                          | No Class |
| 1416278_a_at | Atp5o /// LOC100047429  | ATP synthase, H+ transporting, mitochondrial F1 complex, O subunit /// similar to ATP synthase, H+ transp | No Class |
| 1434053_x_at | Atp5k                   | ATP synthase, H+ transporting, mitochondrial F1F0 complex, subunit e                                      | No Class |
| 1423716_s_at | Atp5d                   | ATP synthase, H+ transporting, mitochondrial F1 complex, delta subunit                                    | No Class |
| 1416829_at   | Atp5b                   | ATP synthase, H+ transporting mitochondrial F1 complex, beta subunit                                      | No Class |
| 1423111_at   | Atp5a1                  | ATP synthase, H+ transporting, mitochondrial F1 complex, alpha subunit 1                                  | No Class |
| 1420037_at   | Atp5a1                  | ATP synthase, H+ transporting, mitochondrial F1 complex, alpha subunit, isoform 1                         | No Class |
| 1448911_at   | Atp4b                   | ATPase, H+/K+ exchanging, beta polypeptide                                                                | No Class |
| 1437738_at   | Atp2c1 /// LOC100045884 | ATPase, Ca++-sequestering /// hypothetical protein LOC100045884                                           | No Class |
| 1420403_at   | Atp2b2                  | ATPase, Ca++ transporting, plasma membrane 2                                                              | No Class |
| 1452969_at   | Atp2b1                  | ATPase, Ca++ transporting, plasma membrane 1                                                              | No Class |
| 1428937_at   | Atp2b1                  | ATPase, Ca++ transporting, plasma membrane 1                                                              | No Class |
| 1428936_at   | Atp2b1                  | ATPase, Ca++ transporting, plasma membrane 1                                                              | No Class |
| 1450124_a_at | Atp2a3                  | ATPase, Ca++ transporting, ubiquitous                                                                     | No Class |
| 1421129_a_at | Atp2a3                  | ATPase, Ca++ transporting, ubiquitous                                                                     | No Class |
| 1451071_a_at | Atp1a1                  | ATPase, Na+/K+ transporting, alpha 1 polypeptide                                                          | No Class |
| 1423653_at   | Atp1a1                  | ATPase, Na+/K+ transporting, alpha 1 polypeptide                                                          | No Class |
| 1452746_at   | Atp13a2                 | ATPase type 13A2                                                                                          | No Class |
| 1428340_s_at | Atp13a2                 | ATPase type 13A2                                                                                          | No Class |
| 1451388_a_at | Atp11b                  | ATPase, class VI, type 11B                                                                                | No Class |
| 1452013_at   | Atp10a                  | ATPase, class V, type 10A                                                                                 | No Class |
| 1447851_x_at | Atp10a                  | ATPase, class V, type 10A                                                                                 | No Class |
| 1447272_s_at | Atp10a                  | ATPase, class V, type 10A                                                                                 | No Class |
| 1446802_at   | Atox1                   | ATX1 (antioxidant protein 1) homolog 1 (yeast)                                                            | No Class |
| 1424499_s_at | Atl3                    | atlastin GTPase 3                                                                                         | No Class |
| 1424498_at   | Atl3                    | atlastin GTPase 3                                                                                         | No Class |
| 1435594_at   | Atl2                    | atlastin GTPase 2                                                                                         | No Class |
| 1434662_at   | Atg4a                   | autophagy-related 4A (yeast)                                                                              | No Class |
| 1454973_at   | Atf7ip                  | activating transcription factor 7 interacting protein                                                     | No Class |
| 1425927_a_at | Atf5                    | activating transcription factor 5                                                                         | No Class |
| 1439258_at   | Atf4                    | activating transcription factor 4                                                                         | No Class |
| 1435597_at   | Atad5                   | ATPase family, AAA domain containing 5                                                                    | No Class |
| 1456541_x_at | Atad3a                  | ATPase family, AAA domain containing 3A                                                                   | No Class |
| 1438178_x_at | Atad3a                  | ATPase family, AAA domain containing 3A                                                                   | No Class |
| 1437343_x_at | Atad3a                  | ATPase family, AAA domain containing 3A                                                                   | No Class |
| 1422461_at   | Atad3a                  | ATPase family, AAA domain containing 3A                                                                   | No Class |
| 1460597_at   | Asxl2                   | additional sex combs like 2 (Drosophila)                                                                  | No Class |
| 1452459_at   | Aspm                    | asp (abnormal spindle)-like, microcephaly associated (Drosophila)                                         | No Class |
| 1452958_at   | Asphd2                  | aspartate beta-hydroxylase domain containing 2                                                            | No Class |

|              |          |                                                                                |          |
|--------------|----------|--------------------------------------------------------------------------------|----------|
| 1450058_at   | Asph     | aspartate-beta-hydroxylase                                                     | No Class |
| 1444719_at   | Asph     | Aspartate-beta-hydroxylase                                                     | No Class |
| 1420959_at   | Asph     | aspartate-beta-hydroxylase                                                     | No Class |
| 1451095_at   | Asns     | asparagine synthetase                                                          | No Class |
| 1433966_x_at | Asns     | asparagine synthetase                                                          | No Class |
| 1420985_at   | Ash1l    | ash1 (absent, small, or homeotic)-like (Drosophila)                            | No Class |
| 1460514_s_at | Ascl2    | achaete-scute complex homolog 2 (Drosophila)                                   | No Class |
| 1424225_at   | Asb8     | ankyrin repeat and SOCS box-containing 8                                       | No Class |
| 1424224_at   | Asb8     | ankyrin repeat and SOCS box-containing 8                                       | No Class |
| 1428444_at   | Asb2     | ankyrin repeat and SOCS box-containing 2                                       | No Class |
| 1436208_at   | Asb1     | ankyrin repeat and SOCS box-containing 1                                       | No Class |
| 1434961_at   | Asb1     | ankyrin repeat and SOCS box-containing 1                                       | No Class |
| 1450855_at   | Arvcf    | armadillo repeat gene deleted in velo-cardio-facial syndrome                   | No Class |
| 1423061_at   | Arvcf    | armadillo repeat gene deleted in velo-cardio-facial syndrome                   | No Class |
| 1449174_at   | Art4     | ADP-ribosyltransferase 4                                                       | No Class |
| 1452474_a_at | Art3     | ADP-ribosyltransferase 3                                                       | No Class |
| 1451987_at   | Arrb2    | arrestin, beta 2                                                               | No Class |
| 1426239_s_at | Arrb2    | arrestin, beta 2                                                               | No Class |
| 1436421_s_at | Arpc5l   | actin related protein 2/3 complex, subunit 5-like                              | No Class |
| 1448129_at   | Arpc5    | actin related protein 2/3 complex, subunit 5                                   | No Class |
| 1423589_at   | Arpc4    | actin related protein 2/3 complex, subunit 4                                   | No Class |
| 1423588_at   | Arpc4    | actin related protein 2/3 complex, subunit 4                                   | No Class |
| 1437148_at   | Arpc2    | actin related protein 2/3 complex, subunit 2                                   | No Class |
| 1416226_at   | Arpc1b   | actin related protein 2/3 complex, subunit 1B                                  | No Class |
| 1449696_at   | Arnt     | Aryl hydrocarbon receptor nuclear translocator                                 | No Class |
| 1421721_a_at | Arnt     | aryl hydrocarbon receptor nuclear translocator                                 | No Class |
| 1415780_a_at | Armcx2   | armadillo repeat containing, X-linked 2                                        | No Class |
| 1430472_at   | Armc1    | armadillo repeat containing 1                                                  | No Class |
| 1424640_at   | Arl8a    | ADP-ribosylation factor-like 8A                                                | No Class |
| 1417331_a_at | Arl6     | ADP-ribosylation factor-like 6                                                 | No Class |
| 1429859_a_at | Arl2bp   | ADP-ribosylation factor-like 2 binding protein                                 | No Class |
| 1452103_at   | Arl16    | ADP-ribosylation factor-like 16                                                | No Class |
| 1451025_at   | Arl1     | ADP-ribosylation factor-like 1                                                 | No Class |
| 1427188_at   | Arih1    | ariadne ubiquitin-conjugating enzyme E2 binding protein homolog 1 (Drosophila) | No Class |
| 1431031_at   | Arid4b   | AT rich interactive domain 4B (RBP1-like)                                      | No Class |
| 1456420_at   | Arid4a   | AT rich interactive domain 4A (RBP1-like)                                      | No Class |
| 1447626_x_at | Arid3b   | AT rich interactive domain 3B (BRIGHT-like)                                    | No Class |
| 1454990_at   | Arid2    | AT rich interactive domain 2 (ARID, RFX-like)                                  | No Class |
| 1436577_at   | Arhgef9  | CDC42 guanine nucleotide exchange factor (GEF) 9                               | No Class |
| 1435974_at   | Arhgef9  | CDC42 guanine nucleotide exchange factor (GEF) 9                               | No Class |
| 1457219_at   | Arhgef18 | rho/rac guanine nucleotide exchange factor (GEF) 18                            | No Class |
| 1433682_at   | Arhgef17 | Rho guanine nucleotide exchange factor (GEF) 17                                | No Class |
| 1440403_at   | Arhgef1  | Rho guanine nucleotide exchange factor (GEF) 1                                 | No Class |
| 1448660_at   | Arhgdig  | Rho GDP dissociation inhibitor (GDI) gamma                                     | No Class |
| 1449619_s_at | Arhgap9  | Rho GTPase activating protein 9                                                | No Class |
| 1436097_x_at | Arhgap9  | Rho GTPase activating protein 9                                                | No Class |
| 1424249_a_at | Arhgap9  | Rho GTPase activating protein 9                                                | No Class |
| 1419810_x_at | Arhgap9  | Rho GTPase activating protein 9                                                | No Class |
| 1457410_at   | Arhgap5  | Rho GTPase activating protein 5                                                | No Class |
| 1458462_at   | Arhgap30 | Rho GTPase activating protein 30                                               | No Class |
| 1436171_at   | Arhgap30 | Rho GTPase activating protein 30                                               | No Class |
| 1454745_at   | Arhgap29 | Rho GTPase activating protein 29                                               | No Class |
| 1444512_at   | Arhgap29 | Rho GTPase activating protein 29                                               | No Class |
| 1441618_at   | Arhgap29 | Rho GTPase activating protein 29                                               | No Class |
| 1458688_at   | Arhgap28 | Rho GTPase activating protein 28                                               | No Class |
| 1438139_at   | Arhgap28 | Rho GTPase activating protein 28                                               | No Class |
| 1434809_at   | Arhgap28 | Rho GTPase activating protein 28                                               | No Class |

|              |                          |                                                                                                              |          |
|--------------|--------------------------|--------------------------------------------------------------------------------------------------------------|----------|
| 1447206_at   | Arhgap21                 | Rho GTPase activating protein 21                                                                             | No Class |
| 1431982_at   | Arhgap19                 | Rho GTPase activating protein 19                                                                             | No Class |
| 1442065_at   | Arhgap17                 | Rho GTPase activating protein 17                                                                             | No Class |
| 1441650_at   | Arhgap15                 | Rho GTPase activating protein 15                                                                             | No Class |
| 1435959_at   | Arhgap15                 | Rho GTPase activating protein 15                                                                             | No Class |
| 1444463_at   | Arhgap12                 | Rho GTPase activating protein 12                                                                             | No Class |
| 1424307_at   | Arhgap1                  | Rho GTPase activating protein 1                                                                              | No Class |
| 1434488_at   | Arfrp1                   | ADP-ribosylation factor related protein 1                                                                    | No Class |
| 1456917_at   | Arfgef1                  | ADP-ribosylation factor guanine nucleotide-exchange factor 1(brefeldin A-inhibited)                          | No Class |
| 1426534_a_at | Arfgap3 /// LOC100045474 | ADP-ribosylation factor GTPase activating protein 3 /// similar to ADP-ribosylation factor GTPase activating | No Class |
| 1447229_x_at | Arfgap2                  | ADP-ribosylation factor GTPase activating protein 2                                                          | No Class |
| 1447228_at   | Arfgap2                  | ADP-ribosylation factor GTPase activating protein 2                                                          | No Class |
| 1423053_at   | Arf4                     | ADP-ribosylation factor 4                                                                                    | No Class |
| 1423052_at   | Arf4                     | ADP-ribosylation factor 4                                                                                    | No Class |
| 1421789_s_at | Arf3                     | ADP-ribosylation factor 3                                                                                    | No Class |
| 1420920_a_at | Arf1                     | ADP-ribosylation factor 1                                                                                    | No Class |
| 1436062_at   | Arcn1                    | archain 1                                                                                                    | No Class |
| 1423743_at   | Arcn1                    | archain 1                                                                                                    | No Class |
| 1451282_at   | Arap3                    | ArfGAP with RhoGAP domain, ankyrin repeat and PH domain 3                                                    | No Class |
| 1447407_at   | Arap3                    | ArfGAP with RhoGAP domain, ankyrin repeat and PH domain 3                                                    | No Class |
| 1419833_s_at | Arap3                    | ArfGAP with RhoGAP domain, ankyrin repeat and PH domain 3                                                    | No Class |
| 1440764_at   | Araf                     | v-raf murine sarcoma 3611 viral oncogene homolog                                                             | No Class |
| 1435566_s_at | Araf                     | v-raf murine sarcoma 3611 viral oncogene homolog                                                             | No Class |
| 1455647_at   | Ar                       | androgen receptor                                                                                            | No Class |
| 1437064_at   | Ar                       | androgen receptor                                                                                            | No Class |
| 1459982_a_at | Aqp6                     | aquaporin 6                                                                                                  | No Class |
| 1447745_at   | Aqp4                     | aquaporin 4                                                                                                  | No Class |
| 1434449_at   | Aqp4                     | aquaporin 4                                                                                                  | No Class |
| 1425382_a_at | Aqp4                     | aquaporin 4                                                                                                  | No Class |
| 1450460_at   | Aqp3                     | aquaporin 3                                                                                                  | No Class |
| 1422008_a_at | Aqp3                     | aquaporin 3                                                                                                  | No Class |
| 1422007_at   | Aqp3                     | aquaporin 3                                                                                                  | No Class |
| 1455846_at   | Aqp11                    | aquaporin 11                                                                                                 | No Class |
| 1450921_at   | Aptx                     | aprataxin                                                                                                    | No Class |
| 1455159_at   | Appl1                    | adaptor protein, phosphotyrosine interaction, PH domain and leucine zipper containing 1                      | No Class |
| 1444478_at   | Appl1                    | adaptor protein, phosphotyrosine interaction, PH domain and leucine zipper containing 1                      | No Class |
| 1436116_x_at | Appl1                    | adaptor protein, phosphotyrosine interaction, PH domain and leucine zipper containing 1                      | No Class |
| 1427442_a_at | App                      | amyloid beta (A4) precursor protein                                                                          | No Class |
| 1420621_a_at | App                      | amyloid beta (A4) precursor protein                                                                          | No Class |
| 1451755_a_at | Apobec1                  | apolipoprotein B mRNA editing enzyme, catalytic polypeptide 1                                                | No Class |
| 1417610_at   | Apoa5                    | apolipoprotein A-V                                                                                           | No Class |
| 1432344_a_at | Aplp2                    | amyloid beta (A4) precursor-like protein 2                                                                   | No Class |
| 1423739_x_at | Aplp2                    | amyloid beta (A4) precursor-like protein 2                                                                   | No Class |
| 1421889_a_at | Aplp2                    | amyloid beta (A4) precursor-like protein 2                                                                   | No Class |
| 1421888_x_at | Aplp2                    | amyloid beta (A4) precursor-like protein 2                                                                   | No Class |
| 1421887_a_at | Aplp2                    | amyloid beta (A4) precursor-like protein 2                                                                   | No Class |
| 1435857_s_at | Aplp1                    | amyloid beta (A4) precursor-like protein 1                                                                   | No Class |
| 1416134_at   | Aplp1                    | amyloid beta (A4) precursor-like protein 1                                                                   | No Class |
| 1419773_at   | Aplf                     | aprataxin and PNKP like factor                                                                               | No Class |
| 1453067_at   | Apitd1                   | apoptosis-inducing, TAF9-like domain 1                                                                       | No Class |
| 1439214_a_at | Api5                     | apoptosis inhibitor 5                                                                                        | No Class |
| 1425954_a_at | Apex2                    | apurinic/aprimidinic endonuclease 2                                                                          | No Class |
| 1424322_at   | Apex2                    | apurinic/aprimidinic endonuclease 2                                                                          | No Class |
| 1450497_at   | Apc2                     | adenomatosis polyposis coli 2                                                                                | No Class |
| 1435543_at   | Apc                      | adenomatosis polyposis coli                                                                                  | No Class |
| 1443145_at   | Apbb1ip                  | amyloid beta (A4) precursor protein-binding, family B, member 1 interacting protein                          | No Class |
| 1427077_a_at | Ap2b1                    | adaptor-related protein complex 2, beta 1 subunit                                                            | No Class |

|              |          |                                                                                  |          |
|--------------|----------|----------------------------------------------------------------------------------|----------|
| 1442288_at   | Anxa6    | annexin A6                                                                       | No Class |
| 1457658_x_at | Anxa4    | annexin A4                                                                       | No Class |
| 1424176_a_at | Anxa4    | annexin A4                                                                       | No Class |
| 1451356_at   | Anp32e   | acidic (leucine-rich) nuclear phosphoprotein 32 family, member E                 | No Class |
| 1420592_a_at | Anp32e   | acidic (leucine-rich) nuclear phosphoprotein 32 family, member E                 | No Class |
| 1453041_at   | Ano9     | anoctamin 9                                                                      | No Class |
| 1445631_at   | Ano3     | anoctamin 3                                                                      | No Class |
| 1443612_at   | Ano3     | anoctamin 3                                                                      | No Class |
| 1426672_at   | Ano10    | anoctamin 10                                                                     | No Class |
| 1433543_at   | Anln     | anillin, actin binding protein                                                   | No Class |
| 1448675_at   | Ankzf1   | ankyrin repeat and zinc finger domain containing 1                               | No Class |
| 1419817_s_at | Ankzf1   | ankyrin repeat and zinc finger domain containing 1                               | No Class |
| 1438408_at   | Ankrd56  | ankyrin repeat domain 56                                                         | No Class |
| 1434856_at   | Ankrd44  | ankyrin repeat domain 44                                                         | No Class |
| 1437499_at   | Ankrd39  | ankyrin repeat domain 39                                                         | No Class |
| 1443867_at   | Ankrd12  | ankyrin repeat domain 12                                                         | No Class |
| 1440193_at   | Ankrd12  | ankyrin repeat domain 12                                                         | No Class |
| 1456110_at   | Ankrd11  | ankyrin repeat domain 11                                                         | No Class |
| 1416065_a_at | Ankrd10  | ankyrin repeat domain 10                                                         | No Class |
| 1420992_at   | Ankrd1   | ankyrin repeat domain 1 (cardiac muscle)                                         | No Class |
| 1420991_at   | Ankrd1   | ankyrin repeat domain 1 (cardiac muscle)                                         | No Class |
| 1452872_at   | Ank3     | ankyrin 3, epithelial                                                            | No Class |
| 1452124_at   | Ank3     | ankyrin 3, epithelial                                                            | No Class |
| 1451628_a_at | Ank3     | ankyrin 3, epithelial                                                            | No Class |
| 1424785_at   | Angptl6  | angiopoietin-like 6                                                              | No Class |
| 1439066_at   | Angpt1   | angiopoietin 1                                                                   | No Class |
| 1437050_s_at | Angel2   | angel homolog 2 (Drosophila)                                                     | No Class |
| 1431606_a_at | Angel2   | angel homolog 2 (Drosophila)                                                     | No Class |
| 1440832_at   | Ang4     | angiogenin, ribonuclease A family, member 4                                      | No Class |
| 1438364_x_at | Ang4     | angiogenin, ribonuclease A family, member 4                                      | No Class |
| 1438937_x_at | Ang      | angiogenin, ribonuclease, RNase A family, 5                                      | No Class |
| 1438936_s_at | Ang      | angiogenin, ribonuclease, RNase A family, 5                                      | No Class |
| 1456695_x_at | Anapc5   | anaphase-promoting complex subunit 5                                             | No Class |
| 1435178_x_at | Anapc5   | anaphase-promoting complex subunit 5                                             | No Class |
| 1435177_a_at | Anapc5   | anaphase-promoting complex subunit 5                                             | No Class |
| 1416906_at   | Anapc5   | anaphase-promoting complex subunit 5                                             | No Class |
| 1423931_s_at | Anapc4   | anaphase promoting complex subunit 4                                             | No Class |
| 1423930_at   | Anapc4   | anaphase promoting complex subunit 4                                             | No Class |
| 1447897_x_at | Anapc11  | Anaphase promoting complex subunit 11                                            | No Class |
| 1429376_s_at | Anapc10  | anaphase promoting complex subunit 10                                            | No Class |
| 1429375_at   | Anapc10  | anaphase promoting complex subunit 10                                            | No Class |
| 1444271_at   | Anapc1   | anaphase promoting complex subunit 1                                             | No Class |
| 1434444_s_at | Anapc1   | anaphase promoting complex subunit 1                                             | No Class |
| 1434443_at   | Anapc1   | anaphase promoting complex subunit 1                                             | No Class |
| 1417570_at   | Anapc1   | anaphase promoting complex subunit 1                                             | No Class |
| 1453439_at   | Amtn     | amelotin                                                                         | No Class |
| 1455247_at   | Amotl1   | angiomin-like 1                                                                  | No Class |
| 1427584_at   | Amot     | angiomin                                                                         | No Class |
| 1428904_at   | Ammecr1l | AMME chromosomal region gene 1-like                                              | No Class |
| 1416649_at   | Ambp     | alpha 1 microglobulin/bikunin                                                    | No Class |
| 1417208_at   | Amacr    | alpha-methylacyl-CoA racemase                                                    | No Class |
| 1423611_at   | Alpl     | alkaline phosphatase, liver/bone/kidney                                          | No Class |
| 1449573_at   | Alpk3    | alpha-kinase 3                                                                   | No Class |
| 1456950_at   | Alms1    | Alstrom syndrome 1 homolog (human)                                               | No Class |
| 1444207_at   | Alms1    | Alstrom syndrome 1 homolog (human)                                               | No Class |
| 1449987_at   | Alk      | anaplastic lymphoma kinase                                                       | No Class |
| 1421059_a_at | Alg2     | asparagine-linked glycosylation 2 homolog (yeast, alpha-1,3-mannosyltransferase) | No Class |

|              |                           |                                                                                       |          |
|--------------|---------------------------|---------------------------------------------------------------------------------------|----------|
| 1419114_at   | Alg14                     | asparagine-linked glycosylation 14 homolog (yeast)                                    | No Class |
| 1439375_x_at | Aldoa                     | aldolase A, fructose-bisphosphate                                                     | No Class |
| 1434799_x_at | Aldoa                     | aldolase A, fructose-bisphosphate                                                     | No Class |
| 1433604_x_at | Aldoa                     | aldolase A, fructose-bisphosphate                                                     | No Class |
| 1416921_x_at | Aldoa                     | aldolase A, fructose-bisphosphate                                                     | No Class |
| 1415776_at   | Aldh3a2                   | aldehyde dehydrogenase family 3, subfamily A2                                         | No Class |
| 1451260_at   | Aldh1b1                   | aldehyde dehydrogenase 1 family, member B1                                            | No Class |
| 1437620_x_at | Aldh18a1                  | aldehyde dehydrogenase 18 family, member A1                                           | No Class |
| 1437333_x_at | Aldh18a1                  | aldehyde dehydrogenase 18 family, member A1                                           | No Class |
| 1437325_x_at | Aldh18a1                  | aldehyde dehydrogenase 18 family, member A1                                           | No Class |
| 1435855_x_at | Aldh18a1                  | aldehyde dehydrogenase 18 family, member A1                                           | No Class |
| 1445867_at   | AL023008                  | expressed sequence AL023008                                                           | No Class |
| 1452684_at   | Akt1s1                    | AKT1 substrate 1 (proline-rich)                                                       | No Class |
| 1425711_a_at | Akt1                      | thymoma viral proto-oncogene 1                                                        | No Class |
| 1416657_at   | Akt1                      | thymoma viral proto-oncogene 1                                                        | No Class |
| 1458300_at   | Akr7a5                    | aldo-keto reductase family 7, member A5 (aflatoxin aldehyde reductase)                | No Class |
| 1417294_at   | Akr7a5                    | aldo-keto reductase family 7, member A5 (aflatoxin aldehyde reductase)                | No Class |
| 1418672_at   | Akr1c13                   | aldo-keto reductase family 1, member C13                                              | No Class |
| 1450455_s_at | Akr1c12 /// Akr1c13       | aldo-keto reductase family 1, member C12 /// aldo-keto reductase family 1, member C13 | No Class |
| 1422000_at   | Akr1c12                   | aldo-keto reductase family 1, member C12                                              | No Class |
| 1451035_a_at | Akr1a4                    | aldo-keto reductase family 1, member A4 (aldehyde reductase)                          | No Class |
| 1435011_x_at | Akr1a4                    | aldo-keto reductase family 1, member A4 (aldehyde reductase)                          | No Class |
| 1430124_x_at | Akr1a4                    | aldo-keto reductase family 1, member A4 (aldehyde reductase)                          | No Class |
| 1430123_a_at | Akr1a4                    | aldo-keto reductase family 1, member A4 (aldehyde reductase)                          | No Class |
| 1435769_at   | Akap9                     | A kinase (PRKA) anchor protein (yotiao) 9                                             | No Class |
| 1431717_at   | Akap5                     | A kinase (PRKA) anchor protein 5                                                      | No Class |
| 1430185_at   | Akap13                    | A kinase (PRKA) anchor protein 13                                                     | No Class |
| 1421121_at   | Akap10                    | A kinase (PRKA) anchor protein 10                                                     | No Class |
| 1449019_at   | Akap1                     | A kinase (PRKA) anchor protein 1                                                      | No Class |
| 1418279_a_at | Akap1                     | A kinase (PRKA) anchor protein 1                                                      | No Class |
| 1430781_at   | Ak7                       | adenylate kinase 7                                                                    | No Class |
| 1457032_at   | Ak5                       | adenylate kinase 5                                                                    | No Class |
| 1426339_at   | Ak5                       | adenylate kinase 5                                                                    | No Class |
| 1450387_s_at | Ak3l1 /// LOC100047616    | adenylate kinase 3-like 1 /// similar to adenylate kinase 4                           | No Class |
| 1421830_at   | Ak3l1 /// LOC100047616    | adenylate kinase 3-like 1 /// similar to adenylate kinase 4                           | No Class |
| 1421831_at   | Ak3l1                     | adenylate kinase 3-like 1                                                             | No Class |
| 1432436_a_at | Ak3                       | adenylate kinase 3                                                                    | No Class |
| 1423718_at   | Ak3                       | adenylate kinase 3                                                                    | No Class |
| 1423717_at   | Ak3                       | adenylate kinase 3                                                                    | No Class |
| 1445173_at   | AK129341                  | cDNA sequence AK129341                                                                | No Class |
| 1416486_at   | Aimp1                     | aminoacyl tRNA synthetase complex-interacting multifunctional protein 1               | No Class |
| 1455112_at   | Aifm2                     | apoptosis-inducing factor, mitochondrion-associated 2                                 | No Class |
| 1431143_x_at | Aifm2                     | apoptosis-inducing factor, mitochondrion-associated 2                                 | No Class |
| 1431142_s_at | Aifm2                     | apoptosis-inducing factor, mitochondrion-associated 2                                 | No Class |
| 1460345_at   | Aida                      | axin interactor, dorsalization associated                                             | No Class |
| 1423870_at   | Aida                      | axin interactor, dorsalization associated                                             | No Class |
| 1459716_at   | AI835735                  | expressed sequence AI835735                                                           | No Class |
| 1435710_at   | AI661384                  | expressed sequence AI661384                                                           | No Class |
| 1459922_at   | AI646383                  | expressed sequence AI646383                                                           | No Class |
| 1457797_at   | AI605517                  | expressed sequence AI605517                                                           | No Class |
| 1456064_at   | AI504432                  | expressed sequence AI504432                                                           | No Class |
| 1455161_at   | AI504432                  | expressed sequence AI504432                                                           | No Class |
| 1437017_at   | AI480653 /// LOC100047112 | expressed sequence AI480653 /// similar to Expressed sequence AI480653                | No Class |
| 1433466_at   | AI467606                  | expressed sequence AI467606                                                           | No Class |
| 1433465_a_at | AI467606                  | expressed sequence AI467606                                                           | No Class |
| 1443972_at   | AI465300                  | expressed sequence AI465300                                                           | No Class |
| 1442122_at   | AI451458                  | expressed sequence AI451458                                                           | No Class |

|              |                          |                                                                                                            |          |
|--------------|--------------------------|------------------------------------------------------------------------------------------------------------|----------|
| 1447436_at   | AI451250                 | expressed sequence AI451250                                                                                | No Class |
| 1427503_at   | AI324046                 | expressed sequence AI324046                                                                                | No Class |
| 1445481_at   | AI317158                 | expressed sequence AI317158                                                                                | No Class |
| 1457168_at   | AI225934                 | expressed sequence AI225934                                                                                | No Class |
| 1443594_at   | AI043046                 | expressed sequence AI043046                                                                                | No Class |
| 1436520_at   | Ahnak2                   | AHNAK nucleoprotein 2                                                                                      | No Class |
| 1424957_at   | Ahdcl                    | AT hook, DNA binding motif, containing 1                                                                   | No Class |
| 1452703_at   | Ahcy12                   | S-adenosylhomocysteine hydrolase-like 2                                                                    | No Class |
| 1460596_at   | Agtrap                   | angiotensin II, type I receptor-associated protein                                                         | No Class |
| 1425221_at   | Agr3                     | anterior gradient homolog 3 (Xenopus laevis)                                                               | No Class |
| 1450776_at   | Agpat6                   | 1-acylglycerol-3-phosphate O-acyltransferase 6 (lysophosphatidic acid acyltransferase, zeta)               | No Class |
| 1421025_at   | Agpat1                   | 1-acylglycerol-3-phosphate O-acyltransferase 1 (lysophosphatidic acid acyltransferase, alpha)              | No Class |
| 1434665_at   | Aga                      | aspartylglucosaminidase                                                                                    | No Class |
| 1454003_at   | Afg3l2                   | AFG3(ATPase family gene 3)-like 2 (yeast)                                                                  | No Class |
| 1430435_at   | Aff3                     | AF4/FMR2 family, member 3                                                                                  | No Class |
| 1458014_at   | Aff2                     | AF4/FMR2 family, member 2                                                                                  | No Class |
| 1455833_at   | Afap1l2                  | actin filament associated protein 1-like 2                                                                 | No Class |
| 1436870_s_at | Afap1l2                  | actin filament associated protein 1-like 2                                                                 | No Class |
| 1454727_at   | Afap1l1                  | actin filament associated protein 1-like 1                                                                 | No Class |
| 1436729_at   | Afap1                    | actin filament associated protein 1                                                                        | No Class |
| 1428018_a_at | AF251705                 | cDNA sequence AF251705                                                                                     | No Class |
| 1450506_a_at | Aen                      | apoptosis enhancing nuclease                                                                               | No Class |
| 1423957_at   | Aen                      | apoptosis enhancing nuclease                                                                               | No Class |
| 1455616_at   | Aebp2                    | AE binding protein 2                                                                                       | No Class |
| 1418372_at   | Adsl                     | adenylosuccinate lyase                                                                                     | No Class |
| 1419263_a_at | Adrm1                    | adhesion regulating molecule 1                                                                             | No Class |
| 1440801_s_at | Adrbk2                   | adrenergic receptor kinase, beta 2                                                                         | No Class |
| 1439178_at   | Adrbk2                   | adrenergic receptor kinase, beta 2                                                                         | No Class |
| 1437302_at   | Adrb2                    | adrenergic receptor, beta 2                                                                                | No Class |
| 1433601_at   | Adra2a                   | adrenergic receptor, alpha 2a                                                                              | No Class |
| 1433600_at   | Adra2a                   | adrenergic receptor, alpha 2a                                                                              | No Class |
| 1455952_at   | Adprhl1                  | ADP-ribosylhydrolase like 1                                                                                | No Class |
| 1434772_at   | Adora2b /// LOC100045233 | adenosine A2b receptor /// similar to Adenosine A2b receptor                                               | No Class |
| 1434431_x_at | Adora2b /// LOC100045233 | adenosine A2b receptor /// similar to Adenosine A2b receptor                                               | No Class |
| 1434430_s_at | Adora2b /// LOC100045233 | adenosine A2b receptor /// similar to Adenosine A2b receptor                                               | No Class |
| 1442856_at   | Adm2                     | adrenomedullin 2                                                                                           | No Class |
| 1426574_a_at | Add3                     | adducin 3 (gamma)                                                                                          | No Class |
| 1423298_at   | Add3                     | adducin 3 (gamma)                                                                                          | No Class |
| 1423297_at   | Add3                     | adducin 3 (gamma)                                                                                          | No Class |
| 1456307_s_at | Adcy7                    | adenylate cyclase 7                                                                                        | No Class |
| 1450065_at   | Adcy7                    | adenylate cyclase 7                                                                                        | No Class |
| 1418128_at   | Adcy6                    | adenylate cyclase 6                                                                                        | No Class |
| 1447696_x_at | Adcy5 /// LOC100047385   | adenylate cyclase 5 /// similar to adenylate cyclase 5                                                     | No Class |
| 1456487_at   | Adcy1                    | adenylate cyclase 1                                                                                        | No Class |
| 1421842_a_at | Adat3 /// Scamp4         | adenosine deaminase, tRNA-specific 3, TAD2 homolog (S. cerevisiae) /// secretory carrier membrane prote    | No Class |
| 1434932_at   | Adarb1                   | adenosine deaminase, RNA-specific, B1                                                                      | No Class |
| 1425405_a_at | Adar                     | adenosine deaminase, RNA-specific                                                                          | No Class |
| 1425639_at   | Adap2                    | ArfGAP with dual PH domains 2                                                                              | No Class |
| 1425638_at   | Adap2                    | ArfGAP with dual PH domains 2                                                                              | No Class |
| 1437785_at   | Adamts9                  | a disintegrin-like and metallopeptidase (reprolysin type) with thrombospondin type 1 motif, 9              | No Class |
| 1456404_at   | Adamts5 /// LOC100048332 | a disintegrin-like and metallopeptidase (reprolysin type) with thrombospondin type 1 motif, 5 (aggrecanase | No Class |
| 1450658_at   | Adamts5 /// LOC100048332 | a disintegrin-like and metallopeptidase (reprolysin type) with thrombospondin type 1 motif, 5 (aggrecanase | No Class |
| 1422561_at   | Adamts5 /// LOC100048332 | a disintegrin-like and metallopeptidase (reprolysin type) with thrombospondin type 1 motif, 5 (aggrecanase | No Class |
| 1441841_at   | Adamts16                 | a disintegrin-like and metallopeptidase (reprolysin type) with thrombospondin type 1 motif, 16             | No Class |
| 1450716_at   | Adamts1                  | a disintegrin-like and metallopeptidase (reprolysin type) with thrombospondin type 1 motif, 1              | No Class |
| 1416871_at   | Adam8                    | a disintegrin and metallopeptidase domain 8                                                                | No Class |
| 1427502_at   | Adam4                    | a disintegrin and metallopeptidase domain 4                                                                | No Class |

|              |                         |                                                                                 |          |
|--------------|-------------------------|---------------------------------------------------------------------------------|----------|
| 1423378_at   | Adam23 /// LOC100046035 | a disintegrin and metallopeptidase domain 23 /// similar to ADAM23              | No Class |
| 1447946_at   | Adam23                  | a disintegrin and metallopeptidase domain 23                                    | No Class |
| 1421858_at   | Adam17                  | a disintegrin and metallopeptidase domain 17                                    | No Class |
| 1454206_a_at | Adam15                  | a disintegrin and metallopeptidase domain 15 (metargidin)                       | No Class |
| 1438760_x_at | Adam15                  | a disintegrin and metallopeptidase domain 15 (metargidin)                       | No Class |
| 1425170_a_at | Adam15                  | a disintegrin and metallopeptidase domain 15 (metargidin)                       | No Class |
| 1416080_at   | Adam15                  | a disintegrin and metallopeptidase domain 15 (metargidin)                       | No Class |
| 1450105_at   | Adam10                  | a disintegrin and metallopeptidase domain 10                                    | No Class |
| 1450104_at   | Adam10                  | a disintegrin and metallopeptidase domain 10                                    | No Class |
| 1450095_a_at | Acyp1                   | acylphosphatase 1, erythrocyte (common) type                                    | No Class |
| 1439013_x_at | Acyp1                   | acylphosphatase 1, erythrocyte (common) type                                    | No Class |
| 1421022_x_at | Acyp1                   | acylphosphatase 1, erythrocyte (common) type                                    | No Class |
| 1437382_at   | Acvr2a                  | activin receptor IIA                                                            | No Class |
| 1443225_at   | Acvr1c                  | activin A receptor, type IC                                                     | No Class |
| 1438309_at   | Acvr1c                  | activin A receptor, type IC                                                     | No Class |
| 1452051_at   | Actr3                   | ARP3 actin-related protein 3 homolog (yeast)                                    | No Class |
| 1434968_a_at | Actr3                   | ARP3 actin-related protein 3 homolog (yeast)                                    | No Class |
| 1426392_a_at | Actr3                   | ARP3 actin-related protein 3 homolog (yeast)                                    | No Class |
| 1441660_at   | Actr2                   | ARP2 actin-related protein 2 homolog (yeast)                                    | No Class |
| 1457970_at   | Actr1a                  | ARP1 actin-related protein 1 homolog A, centractin alpha (yeast)                | No Class |
| 1415779_s_at | Actg1                   | actin, gamma, cytoplasmic 1                                                     | No Class |
| 1436722_a_at | Actb                    | actin, beta                                                                     | No Class |
| 1427735_a_at | Acta1                   | actin, alpha 1, skeletal muscle                                                 | No Class |
| 1452771_s_at | AcsI3                   | acyl-CoA synthetase long-chain family member 3                                  | No Class |
| 1428387_at   | AcsI3                   | acyl-CoA synthetase long-chain family member 3                                  | No Class |
| 1428386_at   | AcsI3                   | acyl-CoA synthetase long-chain family member 3                                  | No Class |
| 1436788_at   | Acp2                    | acid phosphatase 2, lysosomal                                                   | No Class |
| 1424655_at   | Acp2                    | acid phosphatase 2, lysosomal                                                   | No Class |
| 1424654_at   | Acp2                    | acid phosphatase 2, lysosomal                                                   | No Class |
| 1450721_at   | Acp1                    | acid phosphatase 1, soluble                                                     | No Class |
| 1450720_at   | Acp1                    | acid phosphatase 1, soluble                                                     | No Class |
| 1422716_a_at | Acp1                    | acid phosphatase 1, soluble                                                     | No Class |
| 1422715_s_at | Acp1                    | acid phosphatase 1, soluble                                                     | No Class |
| 1420673_a_at | Acox2                   | acyl-Coenzyme A oxidase 2, branched chain                                       | No Class |
| 1437091_at   | Accn4                   | amiloride-sensitive cation channel 4, pituitary                                 | No Class |
| 1425195_a_at | Acat2 /// Acat3         | acetyl-Coenzyme A acetyltransferase 2 /// acetyl-Coenzyme A acetyltransferase 3 | No Class |
| 1424451_at   | Acaa1b                  | acetyl-Coenzyme A acyltransferase 1B                                            | No Class |
| 1433454_at   | Abtb2                   | ankyrin repeat and BTB (POZ) domain containing 2                                | No Class |
| 1433453_a_at | Abtb2                   | ankyrin repeat and BTB (POZ) domain containing 2                                | No Class |
| 1435441_at   | Ablim2                  | actin-binding LIM protein 2                                                     | No Class |
| 1436984_at   | Abi2                    | abl-interactor 2                                                                | No Class |
| 1433985_at   | Abi2                    | abl-interactor 2                                                                | No Class |
| 1450890_a_at | Abi1                    | abl-interactor 1                                                                | No Class |
| 1423177_a_at | Abi1                    | abl-interactor 1                                                                | No Class |
| 1447548_at   | Abhd5                   | abhydrolase domain containing 5                                                 | No Class |
| 1417946_at   | Abhd3                   | abhydrolase domain containing 3                                                 | No Class |
| 1453474_at   | Abhd15                  | abhydrolase domain containing 15                                                | No Class |
| 1424437_s_at | Abcg4                   | ATP-binding cassette, sub-family G (WHITE), member 4                            | No Class |
| 1421168_at   | Abcg3                   | ATP-binding cassette, sub-family G (WHITE), member 3                            | No Class |
| 1455221_at   | Abcg1                   | ATP-binding cassette, sub-family G (WHITE), member 1                            | No Class |
| 1423570_at   | Abcg1                   | ATP-binding cassette, sub-family G (WHITE), member 1                            | No Class |
| 1435752_s_at | Abcc9                   | ATP-binding cassette, sub-family C (CFTR/MRP), member 9                         | No Class |
| 1420408_a_at | Abcc9                   | ATP-binding cassette, sub-family C (CFTR/MRP), member 9                         | No Class |
| 1435683_a_at | Abcc5                   | ATP-binding cassette, sub-family C (CFTR/MRP), member 5                         | No Class |
| 1428988_at   | Abcc3                   | ATP-binding cassette, sub-family C (CFTR/MRP), member 3                         | No Class |
| 1419759_at   | Abcb1a                  | ATP-binding cassette, sub-family B (MDR/TAP), member 1A                         | No Class |
| 1440879_at   | Abca9                   | ATP-binding cassette, sub-family A (ABC1), member 9                             | No Class |

|              |                     |                                                     |          |
|--------------|---------------------|-----------------------------------------------------|----------|
| 1421840_at   | Abca1               | ATP-binding cassette, sub-family A (ABC1), member 1 | No Class |
| 1440364_a_at | Aasdh               | aminoadipate-semialdehyde dehydrogenase             | No Class |
| 1419824_a_at | Aasdh               | aminoadipate-semialdehyde dehydrogenase             | No Class |
| 1435544_at   | Aars /// Exosc6     | alanyl-tRNA synthetase /// exosome component 6      | No Class |
| 1451083_s_at | Aars                | alanyl-tRNA synthetase                              | No Class |
| 1423685_at   | Aars                | alanyl-tRNA synthetase                              | No Class |
| 1452632_at   | Aak1                | AP2 associated kinase 1                             | No Class |
| 1434935_at   | Aak1                | AP2 associated kinase 1                             | No Class |
| 1448813_at   | Aadac               | arylacetamide deacetylase (esterase)                | No Class |
| 1456081_a_at | Aacs                | acetoacetyl-CoA synthetase                          | No Class |
| 1423797_at   | Aacs                | acetoacetyl-CoA synthetase                          | No Class |
| 1457111_at   | AA415038            | expressed sequence AA415038                         | No Class |
| 1445662_x_at | AA414992 /// Gm9629 | expressed sequence AA414992 /// predicted gene 9629 | No Class |
| 1420155_at   | AA408954            | expressed sequence AA408954                         | No Class |
| 1452099_at   | AA408296            | expressed sequence AA408296                         | No Class |
| 1449750_at   | AA407331            | expressed sequence AA407331                         | No Class |
| 1439143_at   | A930018M24Rik       | RIKEN cDNA A930018M24 gene                          | No Class |
| 1429890_at   | A930007D18Rik       | RIKEN cDNA A930007D18 gene                          | No Class |
| 1460135_at   | A930005H10Rik       | RIKEN cDNA A930005H10 gene                          | No Class |
| 1457709_a_at | A930005H10Rik       | RIKEN cDNA A930005H10 gene                          | No Class |
| 1457760_at   | A930004J17Rik       | RIKEN cDNA A930004J17 gene                          | No Class |
| 1435169_at   | A930001N09Rik       | RIKEN cDNA A930001N09 gene                          | No Class |
| 1447591_x_at | A830082N09Rik       | RIKEN cDNA A830082N09 gene                          | No Class |
| 1455554_at   | A830039N20Rik       | RIKEN cDNA A830039N20 gene                          | No Class |
| 1446519_at   | A730091E23Rik       | RIKEN cDNA A730091E23 gene                          | No Class |
| 1427081_at   | A630072M18Rik       | RIKEN cDNA A630072M18 gene                          | No Class |
| 1436447_at   | A630026N12Rik       | RIKEN cDNA A630026N12 gene                          | No Class |
| 1436073_at   | A630007B06Rik       | RIKEN cDNA A630007B06 gene                          | No Class |
| 1444179_at   | A530023O14Rik       | RIKEN cDNA A530023O14 gene                          | No Class |
| 1454278_at   | A430105D02Rik       | RIKEN cDNA A430105D02 gene                          | No Class |
| 1432567_at   | A430105D02Rik       | RIKEN cDNA A430105D02 gene                          | No Class |
| 1458664_at   | A430103D13Rik       | RIKEN cDNA A430103D13 gene                          | No Class |
| 1438895_at   | A430102J17Rik       | RIKEN cDNA A430102J17 gene                          | No Class |
| 1458483_at   | A330102I10Rik       | RIKEN cDNA A330102I10 gene                          | No Class |
| 1457993_at   | A330049N07Rik       | RIKEN cDNA A330049N07 gene                          | No Class |
| 1455358_at   | A2bp1               | ataxin 2 binding protein 1                          | No Class |
| 1442168_at   | A230071A22Rik       | RIKEN cDNA A230071A22 gene                          | No Class |
| 1443133_at   | A230070E04Rik       | RIKEN cDNA A230070E04 gene                          | No Class |
| 1441331_at   | A230061C15Rik       | RIKEN cDNA A230061C15 gene                          | No Class |
| 1438752_at   | A230058F20Rik       | RIKEN cDNA A230058F20 gene                          | No Class |
| 1458051_at   | A230048O21Rik       | RIKEN cDNA A230048O21 gene                          | No Class |
| 1439450_x_at | A230046K03Rik       | RIKEN cDNA A230046K03 gene                          | No Class |
| 1437719_x_at | A230046K03Rik       | RIKEN cDNA A230046K03 gene                          | No Class |
| 1436353_at   | A230046K03Rik       | RIKEN cDNA A230046K03 gene                          | No Class |
| 1427319_at   | A230046K03Rik       | RIKEN cDNA A230046K03 gene                          | No Class |
| 1444343_at   | A130064L14Rik       | RIKEN cDNA A130064L14 gene                          | No Class |
| 1435640_x_at | A130040M12Rik       | RIKEN cDNA A130040M12 gene                          | No Class |
| 1446711_at   | A130040G06Rik       | RIKEN cDNA A130040G06 gene                          | No Class |
| 1457319_at   | A130038J17Rik       | RIKEN cDNA A130038J17 gene                          | No Class |
| 1446619_at   | A130038J17Rik       | RIKEN cDNA A130038J17 gene                          | No Class |
| 1456806_at   | A130010C12Rik       | RIKEN cDNA A130010C12 gene                          | No Class |
| 1441068_at   | A130001G05Rik       | RIKEN cDNA A130001G05 gene                          | No Class |
| 1421680_at   | A030005L19Rik       | RIKEN cDNA A030005L19 gene                          | No Class |
| 1422292_at   | A030005K14Rik       | RIKEN cDNA A030005K14 gene                          | No Class |
| 1457967_at   | A030003K21Rik       | RIKEN cDNA A030003K21 gene                          | No Class |
| 1457102_at   | A030001D16Rik       | RIKEN cDNA A030001D16 gene                          | No Class |
| 1443088_at   | 9930031P18Rik       | RIKEN cDNA 9930031P18 gene                          | No Class |



|              |               |                                 |          |
|--------------|---------------|---------------------------------|----------|
| 1457801_at   | 9930024M15Rik | RIKEN cDNA 9930024M15 gene      | No Class |
| 1438518_at   | 9930021J03Rik | RIKEN cDNA 9930021J03 gene      | No Class |
| 1443257_at   | 9630050E16Rik | RIKEN cDNA 9630050E16 gene      | No Class |
| 1439395_at   | 9630025I21Rik | RIKEN cDNA 9630025I21 gene      | No Class |
| 1459344_at   | 9630019E01Rik | RIKEN cDNA 9630019E01 gene      | No Class |
| 1457523_at   | 9530056K15Rik | RIKEN cDNA 9530056K15 gene      | No Class |
| 1455581_x_at | 9530028C05    | hypothetical protein 9530028C05 | No Class |
| 1433271_at   | 9530004M16Rik | RIKEN cDNA 9530004M16 gene      | No Class |
| 1433270_at   | 9530004M16Rik | RIKEN cDNA 9530004M16 gene      | No Class |
| 1446088_at   | 9430081I23Rik | RIKEN cDNA 9430081I23 gene      | No Class |
| 1453799_at   | 9430038I01Rik | RIKEN cDNA 9430038I01 gene      | No Class |
| 1435159_at   | 9430038I01Rik | RIKEN cDNA 9430038I01 gene      | No Class |
| 1431198_x_at | 9430038I01Rik | RIKEN cDNA 9430038I01 gene      | No Class |
| 1430663_at   | 9430037O13Rik | RIKEN cDNA 9430037O13 gene      | No Class |
| 1445613_at   | 9430019H13Rik | RIKEN cDNA 9430019H13 gene      | No Class |
| 1424075_at   | 9430016H08Rik | RIKEN cDNA 9430016H08 gene      | No Class |
| 1434574_at   | 9430008C03Rik | RIKEN cDNA 9430008C03 gene      | No Class |
| 1458379_at   | 9330159F19Rik | RIKEN cDNA 9330159F19 gene      | No Class |
| 1454194_at   | 9330118I20Rik | RIKEN cDNA 9330118I20 gene      | No Class |
| 1458972_at   | 9330112F22Rik | RIKEN cDNA 9330112F22 gene      | No Class |
| 1456643_at   | 9230114K14Rik | RIKEN cDNA 9230114K14 gene      | No Class |
| 1445271_at   | 9230105E10Rik | RIKEN cDNA 9230105E10 gene      | No Class |
| 1454335_at   | 9130214F15Rik | RIKEN cDNA 9130214F15 gene      | No Class |
| 1440922_at   | 9130208D14Rik | RIKEN cDNA 9130208D14 gene      | No Class |
| 1453245_at   | 9130024F11Rik | RIKEN cDNA 9130024F11 gene      | No Class |
| 1453364_x_at | 9130019O22Rik | RIKEN cDNA 9130019O22 gene      | No Class |
| 1453664_at   | 9130017K11Rik | RIKEN cDNA 9130017K11 gene      | No Class |
| 1430201_at   | 9130017K11Rik | RIKEN cDNA 9130017K11 gene      | No Class |
| 1432894_at   | 9130011L11Rik | RIKEN cDNA 9130011L11 gene      | No Class |
| 1432680_at   | 9130009M17Rik | RIKEN cDNA 9130009M17 gene      | No Class |
| 1430222_at   | 9130007G19Rik | RIKEN cDNA 9130007G19 gene      | No Class |
| 1448251_at   | 9030425E11Rik | RIKEN cDNA 9030425E11 gene      | No Class |
| 1448250_at   | 9030425E11Rik | RIKEN cDNA 9030425E11 gene      | No Class |
| 1457682_at   | 9030420J04Rik | RIKEN cDNA 9030420J04 gene      | No Class |
| 1432896_at   | 9030409K20Rik | RIKEN cDNA 9030409K20 gene      | No Class |
| 1430942_at   | 8430437O03Rik | RIKEN cDNA 8430437O03 gene      | No Class |
| 1460492_at   | 8030498B09Rik | RIKEN cDNA 8030498B09 gene      | No Class |
| 1440604_at   | 8030494B02Rik | Riken cDNA 8030494B02 gene      | No Class |
| 1454252_at   | 8030453O22Rik | RIKEN cDNA 8030453O22 gene      | No Class |
| 1432805_at   | 8030431A06Rik | RIKEN cDNA 8030431A06 gene      | No Class |
| 1429040_at   | 6820431F20Rik | cadherin 11 pseudogene          | No Class |
| 1457278_at   | 6720489N17Rik | RIKEN cDNA 6720489N17 gene      | No Class |
| 1440869_x_at | 6720489N17Rik | RIKEN cDNA 6720489N17 gene      | No Class |
| 1423189_at   | 6720456B07Rik | RIKEN cDNA 6720456B07 gene      | No Class |
| 1442791_x_at | 6720407P12Rik | RIKEN cDNA 6720407P12 gene      | No Class |
| 1444723_at   | 6530418L21Rik | RIKEN cDNA 6530418L21 gene      | No Class |
| 1429949_at   | 6530415H11Rik | RIKEN cDNA 6530415H11 gene      | No Class |
| 1432014_at   | 6530409C15Rik | RIKEN cDNA 6530409C15 gene      | No Class |
| 1431153_at   | 6430597G12Rik | RIKEN cDNA 6430597G12 gene      | No Class |
| 1438878_at   | 6430537K16Rik | RIKEN cDNA 6430537K16 gene      | No Class |
| 1425194_a_at | 6330577E15Rik | RIKEN cDNA 6330577E15 gene      | No Class |
| 1437421_at   | 6330509M05Rik | RIKEN cDNA 6330509M05 gene      | No Class |
| 1439971_at   | 6330439K17Rik | RIKEN cDNA 6330439K17 gene      | No Class |
| 1426316_at   | 6330416G13Rik | RIKEN cDNA 6330416G13 gene      | No Class |
| 1426315_a_at | 6330416G13Rik | RIKEN cDNA 6330416G13 gene      | No Class |
| 1430791_at   | 6330415B21Rik | RIKEN cDNA 6330415B21 gene      | No Class |
| 1452244_at   | 6330406I15Rik | RIKEN cDNA 6330406I15 gene      | No Class |

|              |               |                                 |          |
|--------------|---------------|---------------------------------|----------|
| 1426937_at   | 633040615Rik  | RIKEN cDNA 633040615 gene       | No Class |
| 1453188_at   | 6230424C14Rik | RIKEN cDNA 6230424C14 gene      | No Class |
| 1441972_at   | 6230424C14Rik | RIKEN cDNA 6230424C14 gene      | No Class |
| 1429543_at   | 6230424C14Rik | RIKEN cDNA 6230424C14 gene      | No Class |
| 1433162_at   | 6230414M07Rik | RIKEN cDNA 6230414M07 gene      | No Class |
| 1437753_at   | 6230409E13Rik | RIKEN cDNA 6230409E13 gene      | No Class |
| 1430943_at   | 6030498E09Rik | RIKEN cDNA 6030498E09 gene      | No Class |
| 1443078_at   | 6030439D06Rik | RIKEN cDNA 6030439D06 gene      | No Class |
| 1430585_at   | 5930436O19Rik | RIKEN cDNA 5930436O19 gene      | No Class |
| 1430089_at   | 5830469G19Rik | RIKEN cDNA 5830469G19 gene      | No Class |
| 1429902_at   | 5830443J22Rik | RIKEN cDNA 5830443J22 gene      | No Class |
| 1433105_at   | 5830438M01Rik | RIKEN cDNA 5830438M01 gene      | No Class |
| 1432731_at   | 5830437K03Rik | RIKEN cDNA 5830437K03 gene      | No Class |
| 1437136_at   | 5830436I19Rik | RIKEN cDNA 5830436I19 gene      | No Class |
| 1454447_at   | 5830434F19Rik | RIKEN cDNA 5830434F19 gene      | No Class |
| 1424591_at   | 5830433M19Rik | RIKEN cDNA 5830433M19 gene      | No Class |
| 1440266_at   | 5830428M24Rik | RIKEN cDNA 5830428M24 gene      | No Class |
| 1430379_at   | 5830411K21Rik | RIKEN cDNA 5830411K21 gene      | No Class |
| 1430159_at   | 5830408C22Rik | RIKEN cDNA 5830408C22 gene      | No Class |
| 1429672_at   | 5830407E08Rik | RIKEN cDNA 5830407E08 gene      | No Class |
| 1439981_at   | 5830405N20Rik | RIKEN cDNA 5830405N20 gene      | No Class |
| 1428959_at   | 5830405N20Rik | RIKEN cDNA 5830405N20 gene      | No Class |
| 1444658_at   | 5830403L16Rik | RIKEN cDNA 5830403L16 gene      | No Class |
| 1453073_at   | 5830403F22Rik | RIKEN cDNA 5830403F22 gene      | No Class |
| 1431206_at   | 5730601F06Rik | RIKEN cDNA 5730601F06 gene      | No Class |
| 1432586_at   | 5730596P11Rik | RIKEN cDNA 5730596P11 gene      | No Class |
| 1433115_at   | 5730552O08Rik | RIKEN cDNA 5730552O08 gene      | No Class |
| 1430701_a_at | 5730528L13Rik | RIKEN cDNA 5730528L13 gene      | No Class |
| 1452716_at   | 5730469M10Rik | RIKEN cDNA 5730469M10 gene      | No Class |
| 1447774_x_at | 5730469M10Rik | RIKEN cDNA 5730469M10 gene      | No Class |
| 1431514_at   | 5730453C05Rik | RIKEN cDNA 5730453C05 gene      | No Class |
| 1453591_at   | 5730437N04Rik | RIKEN cDNA 5730437N04 gene      | No Class |
| 1424045_at   | 5730437N04Rik | RIKEN cDNA 5730437N04 gene      | No Class |
| 1430470_at   | 5730411F24Rik | RIKEN cDNA 5730411F24 gene      | No Class |
| 1432942_at   | 5730408A14Rik | RIKEN cDNA 5730408A14 gene      | No Class |
| 1432843_at   | 5730405O12Rik | RIKEN cDNA 5730405O12 gene      | No Class |
| 1460172_at   | 5730403B10Rik | RIKEN cDNA 5730403B10 gene      | No Class |
| 1441976_at   | 5430434G16Rik | RIKEN cDNA 5430434G16 gene      | No Class |
| 1432850_at   | 5430434G16Rik | RIKEN cDNA 5430434G16 gene      | No Class |
| 1454445_at   | 5430430K15Rik | RIKEN cDNA 5430430K15 gene      | No Class |
| 1430373_at   | 5430427O19Rik | RIKEN cDNA 5430427O19 gene      | No Class |
| 1434756_at   | 5430421B17    | hypothetical protein 5430421B17 | No Class |
| 1439071_at   | 5430416N02Rik | RIKEN cDNA 5430416N02 gene      | No Class |
| 1454558_at   | 5430416B10Rik | RIKEN cDNA 5430416B10 gene      | No Class |
| 1430366_at   | 5430405H02Rik | RIKEN cDNA 5430405H02 gene      | No Class |
| 1454418_at   | 5330421C15Rik | RIKEN cDNA 5330421C15 gene      | No Class |
| 1441843_s_at | 5230400M03Rik | RIKEN cDNA 5230400M03 gene      | No Class |
| 1437493_at   | 5230400M03Rik | RIKEN cDNA 5230400M03 gene      | No Class |
| 1433131_at   | 5033425B01Rik | RIKEN cDNA 5033425B01 gene      | No Class |
| 1431256_at   | 5033423O07Rik | RIKEN cDNA 5033423O07 gene      | No Class |
| 1430672_at   | 5033418A18Rik | RIKEN cDNA 5033418A18 gene      | No Class |
| 1433401_at   | 5033405D04Rik | RIKEN cDNA 5033405D04 gene      | No Class |
| 1454786_at   | 5031439G07Rik | RIKEN cDNA 5031439G07 gene      | No Class |
| 1435745_at   | 5031439G07Rik | RIKEN cDNA 5031439G07 gene      | No Class |
| 1438541_at   | 4933439F18Rik | RIKEN cDNA 4933439F18 gene      | No Class |
| 1432234_at   | 4933438B17Rik | RIKEN cDNA 4933438B17 gene      | No Class |
| 1432389_at   | 4933438A12Rik | RIKEN cDNA 4933438A12 gene      | No Class |

|              |                                      |                                                                                                      |          |
|--------------|--------------------------------------|------------------------------------------------------------------------------------------------------|----------|
| 1430836_at   | 4933437G19Rik                        | RIKEN cDNA 4933437G19 gene                                                                           | No Class |
| 1443955_at   | 4933434E2ORik                        | RIKEN cDNA 4933434E20 gene                                                                           | No Class |
| 1433189_at   | 4933433N18Rik                        | RIKEN cDNA 4933433N18 gene                                                                           | No Class |
| 1432243_a_at | 4933433G15Rik                        | RIKEN cDNA 4933433G15 gene                                                                           | No Class |
| 1432313_at   | 4933433F19Rik                        | RIKEN cDNA 4933433F19 gene                                                                           | No Class |
| 1430424_at   | 4933433C11Rik                        | RIKEN cDNA 4933433C11 gene                                                                           | No Class |
| 1438356_x_at | 4933432K03Rik                        | RIKEN cDNA 4933432K03 gene                                                                           | No Class |
| 1434868_at   | 4933431E2ORik                        | RIKEN cDNA 4933431E20 gene                                                                           | No Class |
| 1433145_at   | 4933431C10Rik                        | RIKEN cDNA 4933431C10 gene                                                                           | No Class |
| 1431626_at   | 4933429K18Rik                        | RIKEN cDNA 4933429K18 gene                                                                           | No Class |
| 1456563_at   | 4933429F08Rik                        | RIKEN cDNA 4933429F08 gene                                                                           | No Class |
| 1433385_at   | 4933428C20Rik                        | RIKEN cDNA 4933428C20 gene                                                                           | No Class |
| 1446883_at   | 4933427D06Rik                        | RIKEN cDNA 4933427D06 gene                                                                           | No Class |
| 1430794_at   | 4933426K07Rik                        | RIKEN cDNA 4933426K07 gene                                                                           | No Class |
| 1433112_at   | 4933424L07Rik                        | RIKEN cDNA 4933424L07 gene                                                                           | No Class |
| 1455076_a_at | 4933424B01Rik                        | RIKEN cDNA 4933424B01 gene                                                                           | No Class |
| 1419211_s_at | 4933424B01Rik                        | RIKEN cDNA 4933424B01 gene                                                                           | No Class |
| 1454223_at   | 4933423P22Rik                        | RIKEN cDNA 4933423P22 gene                                                                           | No Class |
| 1454459_at   | 4933423L19Rik                        | RIKEN cDNA 4933423L19 gene                                                                           | No Class |
| 1432974_at   | 4933421H12Rik                        | RIKEN cDNA 4933421H12 gene                                                                           | No Class |
| 1428162_at   | 4933421E11Rik                        | RIKEN cDNA 4933421E11 gene                                                                           | No Class |
| 1454154_at   | 4933416I08Rik                        | RIKEN cDNA 4933416I08 gene                                                                           | No Class |
| 1433151_at   | 4933415b22rik                        | RIKEN cDNA 4933415B22 gene                                                                           | No Class |
| 1433150_at   | 4933415b22rik                        | RIKEN cDNA 4933415B22 gene                                                                           | No Class |
| 1431470_a_at | 4933414I15Rik                        | RIKEN cDNA 4933414I15 gene                                                                           | No Class |
| 1453107_s_at | 4933413G19Rik /// Foxm1 /// Pebp1    | RIKEN cDNA 4933413G19 gene /// forkhead box M1 /// phosphatidylethanolamine binding protein 1        | No Class |
| 1433351_at   | 4933412L11Rik                        | RIKEN cDNA 4933412L11 gene                                                                           | No Class |
| 1447711_x_at | 4933412E12Rik                        | RIKEN cDNA 4933412E12 gene                                                                           | No Class |
| 1429422_at   | 4933412E12Rik                        | RIKEN cDNA 4933412E12 gene                                                                           | No Class |
| 1450076_at   | 4933411K20Rik                        | RIKEN cDNA 4933411K20 gene                                                                           | No Class |
| 1431520_at   | 4933406J09Rik                        | RIKEN cDNA 4933406J09 gene                                                                           | No Class |
| 1430883_at   | 4933402C05Rik                        | RIKEN cDNA 4933402C05 gene                                                                           | No Class |
| 1432210_at   | 4933401H06Rik                        | RIKEN cDNA 4933401H06 gene                                                                           | No Class |
| 1439131_at   | 4932441K18Rik                        | RIKEN cDNA 4932441K18 gene                                                                           | No Class |
| 1448235_s_at | 4932431P20Rik /// Gm12587 /// Gm1393 | RIKEN cDNA 4932431P20 gene /// predicted gene 12587 /// predicted gene 13932 /// predicted gene 2509 | No Class |
| 1432883_at   | 4932431P20Rik                        | RIKEN cDNA 4932431P20 gene                                                                           | No Class |
| 1432871_at   | 4932429P19Rik                        | RIKEN cDNA 4932429P19 gene                                                                           | No Class |
| 1428376_at   | 4932415G12Rik                        | RIKEN cDNA 4932415G12 gene                                                                           | No Class |
| 1433074_at   | 4931412I15Rik                        | RIKEN cDNA 4931412I15 gene                                                                           | No Class |
| 1438798_at   | 4931406P16Rik                        | RIKEN cDNA 4931406P16 gene                                                                           | No Class |
| 1433994_at   | 4931406P16Rik                        | RIKEN cDNA 4931406P16 gene                                                                           | No Class |
| 1454280_at   | 4931406H21Rik                        | RIKEN cDNA 4931406H21 gene                                                                           | No Class |
| 1432438_at   | 4930597L12Rik                        | RIKEN cDNA 4930597L12 gene                                                                           | No Class |
| 1429364_at   | 4930579G24Rik                        | RIKEN cDNA 4930579G24 gene                                                                           | No Class |
| 1432109_at   | 4930578I07Rik                        | RIKEN cDNA 4930578I07 gene                                                                           | No Class |
| 1433244_at   | 4930573G07Rik                        | RIKEN cDNA 4930573G07 gene                                                                           | No Class |
| 1433164_at   | 4930570E01Rik                        | RIKEN cDNA 4930570E01 gene                                                                           | No Class |
| 1430884_at   | 4930568G15Rik                        | RIKEN cDNA 4930568G15 gene                                                                           | No Class |
| 1433036_at   | 4930564B12Rik                        | RIKEN cDNA 4930564B12 gene                                                                           | No Class |
| 1430925_at   | 4930556L07Rik                        | RIKEN cDNA 4930556L07 gene                                                                           | No Class |
| 1421367_at   | 4930549C01Rik                        | RIKEN cDNA 4930549C01 gene                                                                           | No Class |
| 1432111_at   | 4930542D17Rik                        | RIKEN cDNA 4930542D17 gene                                                                           | No Class |
| 1430815_at   | 4930534B04Rik                        | RIKEN cDNA 4930534B04 gene                                                                           | No Class |
| 1429228_at   | 4930534B04Rik                        | RIKEN cDNA 4930534B04 gene                                                                           | No Class |
| 1432240_at   | 4930533L02Rik                        | RIKEN cDNA 4930533L02 gene                                                                           | No Class |
| 1433323_at   | 4930529F21Rik                        | RIKEN cDNA 4930529F21 gene                                                                           | No Class |
| 1431228_s_at | 4930526I15Rik                        | RIKEN cDNA 4930526I15 gene                                                                           | No Class |

|              |                                 |                                                                 |          |
|--------------|---------------------------------|-----------------------------------------------------------------|----------|
| 1431544_at   | 4930524B17Rik                   | RIKEN cDNA 4930524B17 gene                                      | No Class |
| 1432693_at   | 4930517G19Rik                   | RIKEN cDNA 4930517G19 gene                                      | No Class |
| 1432244_at   | 4930507D10Rik                   | RIKEN cDNA 4930507D10 gene                                      | No Class |
| 1429904_at   | 4930507A01Rik                   | RIKEN cDNA 4930507A01 gene                                      | No Class |
| 1430790_at   | 4930485G23Rik                   | RIKEN cDNA 4930485G23 gene                                      | No Class |
| 1460298_at   | 4930483J18Rik                   | RIKEN cDNA 4930483J18 gene                                      | No Class |
| 1453838_at   | 4930471G03Rik                   | RIKEN cDNA 4930471G03 gene                                      | No Class |
| 1454054_at   | 4930459I23Rik                   | RIKEN cDNA 4930459I23 gene                                      | No Class |
| 1454552_at   | 4930456K20Rik                   | RIKEN cDNA 4930456K20 gene                                      | No Class |
| 1431634_at   | 4930455C13Rik                   | RIKEN cDNA 4930455C13 gene                                      | No Class |
| 1453842_at   | 4930448K12Rik                   | RIKEN cDNA 4930448K12 gene                                      | No Class |
| 1432744_at   | 4930443G03Rik                   | RIKEN cDNA 4930443G03 gene                                      | No Class |
| 1430223_at   | 4930442P07Rik                   | RIKEN cDNA 4930442P07 gene                                      | No Class |
| 1432359_at   | 4930435F05Rik                   | RIKEN cDNA 4930435F05 gene                                      | No Class |
| 1433194_at   | 4930433M22Rik                   | RIKEN cDNA 4930433M22 gene                                      | No Class |
| 1431924_at   | 4930432N10Rik                   | RIKEN cDNA 4930432N10 gene                                      | No Class |
| 1431447_at   | 4930432K09Rik                   | RIKEN cDNA 4930432K09 gene                                      | No Class |
| 1433182_at   | 4930431N21Rik                   | RIKEN cDNA 4930431N21 gene                                      | No Class |
| 1430900_at   | 4930430O22Rik                   | RIKEN cDNA 4930430O22 gene                                      | No Class |
| 1432518_at   | 4930430J20Rik                   | RIKEN cDNA 4930430J20 gene                                      | No Class |
| 1429546_at   | 4930423K06Rik                   | RIKEN cDNA 4930423K06 gene                                      | No Class |
| 1436337_at   | 4930420K17Rik                   | RIKEN cDNA 4930420K17 gene                                      | No Class |
| 1432343_at   | 4930419G24Rik                   | RIKEN cDNA 4930419G24 gene                                      | No Class |
| 1432541_at   | 4930408O17Rik                   | RIKEN cDNA 4930408O17 gene                                      | No Class |
| 1428833_at   | 4930406D14Rik                   | RIKEN cDNA 4930406D14 gene                                      | No Class |
| 1433336_at   | 4930405G09Rik                   | RIKEN cDNA 4930405G09 gene                                      | No Class |
| 1432971_at   | 4921518B13Rik                   | RIKEN cDNA 4921518B13 gene                                      | No Class |
| 1459879_at   | 4921513D23Rik                   | RIKEN cDNA 4921513D23 gene                                      | No Class |
| 1439093_at   | 4921509J17Rik                   | RIKEN cDNA 4921509J17 gene                                      | No Class |
| 1429106_at   | 4921509I17Rik                   | RIKEN cDNA 4921509I17 gene                                      | No Class |
| 1450463_at   | 4833439L19Rik                   | RIKEN cDNA 4833439L19 gene                                      | No Class |
| 1448100_at   | 4833439L19Rik                   | RIKEN cDNA 4833439L19 gene                                      | No Class |
| 1422017_s_at | 4833439L19Rik                   | RIKEN cDNA 4833439L19 gene                                      | No Class |
| 1430267_at   | 4833422M21Rik                   | RIKEN cDNA 4833422M21 gene                                      | No Class |
| 1430220_at   | 4833420G17Rik                   | RIKEN cDNA 4833420G17 gene                                      | No Class |
| 1432719_at   | 4833412K13Rik                   | RIKEN cDNA 4833412K13 gene                                      | No Class |
| 1429031_at   | 4833408D11Rik                   | RIKEN cDNA 4833408D11 gene                                      | No Class |
| 1430709_at   | 4833405L11Rik                   | RIKEN cDNA 4833405L11 gene                                      | No Class |
| 1454038_at   | 4833403I15Rik                   | RIKEN cDNA 4833403I15 gene                                      | No Class |
| 1442369_at   | 4832406H04Rik                   | RIKEN cDNA 4832406H04 gene                                      | No Class |
| 1430566_at   | 4733401A01Rik                   | RIKEN cDNA 4733401A01 gene                                      | No Class |
| 1458086_at   | 4732471D19Rik                   | RIKEN cDNA 4732471D19 gene                                      | No Class |
| 1455635_at   | 4732460I02Rik                   | RIKEN cDNA 4732460I02 gene                                      | No Class |
| 1429822_at   | 4633401B06Rik                   | RIKEN cDNA 4633401B06 gene                                      | No Class |
| 1456201_at   | 4632427E13Rik                   | RIKEN cDNA 4632427E13 gene                                      | No Class |
| 1442155_at   | 4632427E13Rik                   | RIKEN cDNA 4632427E13 gene                                      | No Class |
| 1453976_at   | 4432414F05Rik                   | RIKEN cDNA 4432414F05 gene                                      | No Class |
| 1455541_a_at | 4430402I18Rik                   | RIKEN cDNA 4430402I18 gene                                      | No Class |
| 1438804_at   |                                 | Sep-10 septin 10                                                | No Class |
| 1437208_at   |                                 | Sep-10 septin 10                                                | No Class |
| 1426802_at   |                                 | Sep-08 septin 8                                                 | No Class |
| 1426801_at   |                                 | Sep-08 septin 8                                                 | No Class |
| 1428385_at   |                                 | Mar-08 membrane-associated ring finger (C3HC4) 8                | No Class |
| 1453238_s_at | 3930401B19Rik /// A130040M12Rik | /// E RIKEN cDNA 3930401B19 gene /// RIKEN cDNA A130040M12 gene | No Class |
| 1440966_at   |                                 | Mar-07 membrane-associated ring finger (C3HC4) 7                | No Class |
| 1440939_at   |                                 | Sep-06 septin 6                                                 | No Class |
| 1436819_at   |                                 | Sep-06 septin 6                                                 | No Class |

|              |                          |                                                          |          |
|--------------|--------------------------|----------------------------------------------------------|----------|
| 1424181_at   |                          | Sep-06 septin 6                                          | No Class |
| 1420877_at   |                          | Sep-06 septin 6                                          | No Class |
| 1452925_a_at |                          | Mar-05 membrane-associated ring finger (C3HC4) 5         | No Class |
| 1428843_at   |                          | Mar-05 membrane-associated ring finger (C3HC4) 5         | No Class |
| 1417414_at   |                          | Sep-03 septin 3                                          | No Class |
| 1440209_at   |                          | Mar-01 membrane-associated ring finger (C3HC4) 1         | No Class |
| 1434955_at   |                          | Mar-01 membrane-associated ring finger (C3HC4) 1         | No Class |
| 1432649_at   | 3300002A11Rik            | RIKEN cDNA 3300002A11 gene                               | No Class |
| 1447666_x_at | 3200002M19Rik /// Gm6843 | RIKEN cDNA 3200002M19 gene /// predicted pseudogene 6843 | No Class |
| 1424328_s_at | 3200002M19Rik            | RIKEN cDNA 3200002M19 gene                               | No Class |
| 1424327_at   | 3200002M19Rik            | RIKEN cDNA 3200002M19 gene                               | No Class |
| 1431850_at   | 3200001D21Rik            | RIKEN cDNA 3200001D21 gene                               | No Class |
| 1453007_at   | 3110082I17Rik            | RIKEN cDNA 3110082I17 gene                               | No Class |
| 1441559_at   | 3110082D06Rik            | RIKEN cDNA 3110082D06 gene                               | No Class |
| 1448012_at   | 3110053B16Rik            | RIKEN cDNA 3110053B16 gene                               | No Class |
| 1440204_at   | 3110039M20Rik            | RIKEN cDNA 3110039M20 gene                               | No Class |
| 1432905_at   | 3110037C07Rik            | RIKEN cDNA 3110037C07 gene                               | No Class |
| 1445708_x_at | 3110021A11Rik            | RIKEN cDNA 3110021A11 gene                               | No Class |
| 1432369_at   | 3010027C24Rik            | RIKEN cDNA 3010027C24 gene                               | No Class |
| 1433399_at   | 2900078I11Rik            | RIKEN cDNA 2900078I11 gene                               | No Class |
| 1433123_at   | 2900069G24Rik            | RIKEN cDNA 2900069G24 gene                               | No Class |
| 1428333_at   | 2900062L11Rik            | RIKEN cDNA 2900062L11 gene                               | No Class |
| 1441816_at   | 2900056M20Rik            | RIKEN cDNA 2900056M20 gene                               | No Class |
| 1454502_at   | 2900022B07Rik            | RIKEN cDNA 2900022B07 gene                               | No Class |
| 1454448_at   | 2900018E21Rik            | RIKEN cDNA 2900018E21 gene                               | No Class |
| 1432757_at   | 2900011L18Rik            | RIKEN cDNA 2900011L18 gene                               | No Class |
| 1448685_at   | 2900010M23Rik            | RIKEN cDNA 2900010M23 gene                               | No Class |
| 1433480_at   | 2900010J23Rik            | RIKEN cDNA 2900010J23 gene                               | No Class |
| 1452989_at   | 2900009J20Rik            | RIKEN cDNA 2900009J20 gene                               | No Class |
| 1438122_at   | 2900006K08Rik            | RIKEN cDNA 2900006K08 gene                               | No Class |
| 1437110_at   | 2810474O19Rik            | RIKEN cDNA 2810474O19 gene                               | No Class |
| 1429588_at   | 2810474O19Rik            | RIKEN cDNA 2810474O19 gene                               | No Class |
| 1427334_s_at | 2810474O19Rik            | RIKEN cDNA 2810474O19 gene                               | No Class |
| 1452980_at   | 2810468N07Rik            | RIKEN cDNA 2810468N07 gene                               | No Class |
| 1452354_at   | 2810459M11Rik            | RIKEN cDNA 2810459M11 gene                               | No Class |
| 1431412_at   | 2810455B08Rik            | RIKEN cDNA 2810455B08 gene                               | No Class |
| 1423679_at   | 2810432L12Rik            | RIKEN cDNA 2810432L12 gene                               | No Class |
| 1454412_at   | 2810410P21Rik            | RIKEN cDNA 2810410P21 gene                               | No Class |
| 1453293_a_at | 2810408A11Rik            | RIKEN cDNA 2810408A11 gene                               | No Class |
| 1453726_s_at | 2810407C02Rik            | RIKEN cDNA 2810407C02 gene                               | No Class |
| 1424692_at   | 2810055F11Rik            | RIKEN cDNA 2810055F11 gene                               | No Class |
| 1427397_at   | 2810046L04Rik            | RIKEN cDNA 2810046L04 gene                               | No Class |
| 1453747_at   | 2810021J22Rik            | RIKEN cDNA 2810021J22 gene                               | No Class |
| 1427349_x_at | 2810021G02Rik            | RIKEN cDNA 2810021G02 gene                               | No Class |
| 1428921_at   | 2810021B07Rik            | RIKEN cDNA 2810021B07 gene                               | No Class |
| 1423623_at   | 2810021B07Rik            | RIKEN cDNA 2810021B07 gene                               | No Class |
| 1441087_at   | 2810011L19Rik            | RIKEN cDNA 2810011L19 gene                               | No Class |
| 1448947_at   | 2810004N23Rik            | RIKEN cDNA 2810004N23 gene                               | No Class |
| 1440183_x_at | 2810002N01Rik            | RIKEN cDNA 2810002N01 gene                               | No Class |
| 1431912_at   | 2700089I24Rik            | RIKEN cDNA 2700089I24 gene                               | No Class |
| 1451556_a_at | 2700078E11Rik            | RIKEN cDNA 2700078E11 gene                               | No Class |
| 1424983_a_at | 2700078E11Rik            | RIKEN cDNA 2700078E11 gene                               | No Class |
| 1424982_a_at | 2700078E11Rik            | RIKEN cDNA 2700078E11 gene                               | No Class |
| 1448238_at   | 2700060E02Rik            | RIKEN cDNA 2700060E02 gene                               | No Class |
| 1453603_at   | 2700022O18Rik            | RIKEN cDNA 2700022O18 gene                               | No Class |
| 1433212_at   | 2700008E08Rik            | RIKEN cDNA 2700008E08 gene                               | No Class |
| 1428519_at   | 2610528E23Rik            | RIKEN cDNA 2610528E23 gene                               | No Class |

|              |                                 |                                                                  |          |
|--------------|---------------------------------|------------------------------------------------------------------|----------|
| 1453749_at   | 2610507I01Rik                   | RIKEN cDNA 2610507I01 gene                                       | No Class |
| 1431141_at   | 2610507I01Rik                   | RIKEN cDNA 2610507I01 gene                                       | No Class |
| 1429268_at   | 2610318N02Rik                   | RIKEN cDNA 2610318N02 gene                                       | No Class |
| 1455160_at   | 2610203C20Rik                   | RIKEN cDNA 2610203C20 gene                                       | No Class |
| 1457593_at   | 2610202C22Rik                   | RIKEN cDNA 2610202C22 gene                                       | No Class |
| 1439516_at   | 2610201A13Rik                   | RIKEN cDNA 2610201A13 gene                                       | No Class |
| 1435381_at   | 2610110G12Rik                   | RIKEN cDNA 2610110G12 gene                                       | No Class |
| 1429603_at   | 2610110G12Rik                   | RIKEN cDNA 2610110G12 gene                                       | No Class |
| 1429006_s_at | 2610110G12Rik                   | RIKEN cDNA 2610110G12 gene                                       | No Class |
| 1456158_at   | 2610109H07Rik                   | RIKEN cDNA 2610109H07 gene                                       | No Class |
| 1453053_at   | 2610036L11Rik                   | RIKEN cDNA 2610036L11 gene                                       | No Class |
| 1429156_at   | 2610036L11Rik                   | RIKEN cDNA 2610036L11 gene                                       | No Class |
| 1421089_a_at | 2610028A01Rik                   | RIKEN cDNA 2610028A01 gene                                       | No Class |
| 1442445_at   | 2610027H17Rik                   | RIKEN cDNA 2610027H17 gene                                       | No Class |
| 1432962_at   | 2610024D14Rik                   | RIKEN cDNA 2610024D14 gene                                       | No Class |
| 1431667_s_at | 2610021K21Rik                   | RIKEN cDNA 2610021K21 gene                                       | No Class |
| 1430339_at   | 2610021K21Rik                   | RIKEN cDNA 2610021K21 gene                                       | No Class |
| 1419033_at   | 2610018G03Rik                   | RIKEN cDNA 2610018G03 gene                                       | No Class |
| 1427497_at   | 2610015P09Rik                   | RIKEN cDNA 2610015P09 gene                                       | No Class |
| 1453589_a_at | 2610005L07Rik /// 6820431F20Rik | cadherin 11 pseudogene /// cadherin 11 pseudogene                | No Class |
| 1456310_a_at | 2610002J02Rik                   | RIKEN cDNA 2610002J02 gene                                       | No Class |
| 1438154_x_at | 2610002J02Rik                   | RIKEN cDNA 2610002J02 gene                                       | No Class |
| 1428552_at   | 2610001J05Rik                   | RIKEN cDNA 2610001J05 gene                                       | No Class |
| 1432651_at   | 2510019K15Rik                   | RIKEN cDNA 2510019K15 gene                                       | No Class |
| 1423409_a_at | 2500003M10Rik                   | RIKEN cDNA 2500003M10 gene                                       | No Class |
| 1455052_a_at | 2410129H14Rik                   | RIKEN cDNA 2410129H14 gene                                       | No Class |
| 1434664_at   | 2410129H14Rik                   | RIKEN cDNA 2410129H14 gene                                       | No Class |
| 1434663_at   | 2410129H14Rik                   | RIKEN cDNA 2410129H14 gene                                       | No Class |
| 1441957_x_at | 2410076I21Rik                   | RIKEN cDNA 2410076I21 gene                                       | No Class |
| 1429203_at   | 2410076I21Rik                   | RIKEN cDNA 2410076I21 gene                                       | No Class |
| 1433872_at   | 2410042D21Rik                   | RIKEN cDNA 2410042D21 gene                                       | No Class |
| 1426495_at   | 2410042D21Rik                   | RIKEN cDNA 2410042D21 gene                                       | No Class |
| 1447936_at   | 2410006H16Rik                   | RIKEN cDNA 2410006H16 gene                                       | No Class |
| 1445658_at   | 2410003L11Rik                   | RIKEN cDNA 2410003L11 gene                                       | No Class |
| 1428495_at   | 2410003K15Rik                   | RIKEN cDNA 2410003K15 gene                                       | No Class |
| 1453332_at   | 2410002O22Rik /// LOC100044475  | RIKEN cDNA 2410002O22 gene /// hypothetical protein LOC100044475 | No Class |
| 1437985_a_at | 2310061I04Rik                   | RIKEN cDNA 2310061I04 gene                                       | No Class |
| 1439419_at   | 2310057M21Rik                   | RIKEN cDNA 2310057M21 gene                                       | No Class |
| 1455389_s_at | 2310051F07Rik                   | RIKEN cDNA 2310051F07 gene                                       | No Class |
| 1424915_s_at | 2310044G17Rik                   | RIKEN cDNA 2310044G17 gene                                       | No Class |
| 1424914_at   | 2310044G17Rik                   | RIKEN cDNA 2310044G17 gene                                       | No Class |
| 1424913_at   | 2310044G17Rik                   | RIKEN cDNA 2310044G17 gene                                       | No Class |
| 1445537_at   | 2310039F13Rik                   | RIKEN cDNA 2310039F13 gene                                       | No Class |
| 1432295_a_at | 2310035K24Rik                   | RIKEN cDNA 2310035K24 gene                                       | No Class |
| 1428241_at   | 2310035K24Rik                   | RIKEN cDNA 2310035K24 gene                                       | No Class |
| 1457678_at   | 2310035C23Rik                   | RIKEN cDNA 2310035C23 gene                                       | No Class |
| 1429213_at   | 2310030N02Rik                   | RIKEN cDNA 2310030N02 gene                                       | No Class |
| 1449357_at   | 2310030G06Rik                   | RIKEN cDNA 2310030G06 gene                                       | No Class |
| 1455126_x_at | 2310028O11Rik                   | RIKEN cDNA 2310028O11 gene                                       | No Class |
| 1428910_at   | 2310022B05Rik                   | RIKEN cDNA 2310022B05 gene                                       | No Class |
| 1435522_a_at | 2310016E02Rik                   | RIKEN cDNA 2310016E02 gene                                       | No Class |
| 1431558_at   | 2310016D03Rik                   | RIKEN cDNA 2310016D03 gene                                       | No Class |
| 1423206_s_at | 2310003F16Rik                   | RIKEN cDNA 2310003F16 gene                                       | No Class |
| 1425233_at   | 2210407C18Rik                   | RIKEN cDNA 2210407C18 gene                                       | No Class |
| 1430878_at   | 2210406H18Rik                   | RIKEN cDNA 2210406H18 gene                                       | No Class |
| 1435689_at   | 2210404J11Rik                   | RIKEN cDNA 2210404J11 gene                                       | No Class |
| 1433208_at   | 2210017G18Rik                   | RIKEN cDNA 2210017G18 gene                                       | No Class |

|              |                                      |                                                                                                     |          |
|--------------|--------------------------------------|-----------------------------------------------------------------------------------------------------|----------|
| 1430637_at   | 2210016H18Rik                        | RIKEN cDNA 2210016H18 gene                                                                          | No Class |
| 1454224_at   | 2010300F17Rik                        | RIKEN cDNA 2010300F17 gene                                                                          | No Class |
| 1452417_x_at | 2010205A11Rik /// Gm10883 /// Gm1420 | RIKEN cDNA 2010205A11 gene /// predicted gene 10883 /// predicted gene 1420 /// predicted gene 7202 | No Class |
| 1449496_at   | 2010109I03Rik                        | RIKEN cDNA 2010109I03 gene                                                                          | No Class |
| 1446748_at   | 2010007H06Rik                        | RIKEN cDNA 2010007H06 gene                                                                          | No Class |
| 1447576_at   | 2010001K21Rik                        | RIKEN cDNA 2010001K21 gene                                                                          | No Class |
| 1441251_a_at | 2010001A14Rik                        | RIKEN cDNA 2010001A14 gene                                                                          | No Class |
| 1425921_a_at | 1810055G02Rik                        | RIKEN cDNA 1810055G02 gene                                                                          | No Class |
| 1428554_a_at | 1810035L17Rik                        | RIKEN cDNA 1810035L17 gene                                                                          | No Class |
| 1429198_at   | 1810030O07Rik                        | RIKEN cDNA 1810030O07 gene                                                                          | No Class |
| 1454355_at   | 1810021M19Rik                        | RIKEN cDNA 1810021M19 gene                                                                          | No Class |
| 1417798_at   | 1810019J16Rik                        | RIKEN cDNA 1810019J16 gene                                                                          | No Class |
| 1431175_at   | 1810019D21Rik                        | RIKEN cDNA 1810019D21 gene                                                                          | No Class |
| 1429260_at   | 1810014B01Rik                        | RIKEN cDNA 1810014B01 gene                                                                          | No Class |
| 1454271_at   | 1810013D15Rik                        | RIKEN cDNA 1810013D15 gene                                                                          | No Class |
| 1439994_at   | 1810013D10Rik                        | RIKEN cDNA 1810013D10 gene                                                                          | No Class |
| 1440234_at   | 1810012P15Rik                        | RIKEN cDNA 1810012P15 gene                                                                          | No Class |
| 1451415_at   | 1810011O10Rik                        | RIKEN cDNA 1810011O10 gene                                                                          | No Class |
| 1435595_at   | 1810011O10Rik                        | RIKEN cDNA 1810011O10 gene                                                                          | No Class |
| 1459141_at   | 1810008I18Rik                        | RIKEN cDNA 1810008I18 gene                                                                          | No Class |
| 1454256_s_at | 1700113I22Rik                        | RIKEN cDNA 1700113I22 gene                                                                          | No Class |
| 1432073_at   | 1700113I22Rik                        | RIKEN cDNA 1700113I22 gene                                                                          | No Class |
| 1440172_s_at | 1700113H08Rik                        | RIKEN cDNA 1700113H08 gene                                                                          | No Class |
| 1432371_a_at | 1700109K24Rik                        | RIKEN cDNA 1700109K24 gene                                                                          | No Class |
| 1453508_at   | 1700104B16Rik                        | RIKEN cDNA 1700104B16 gene                                                                          | No Class |
| 1455692_x_at | 1700097N02Rik                        | RIKEN cDNA 1700097N02 gene                                                                          | No Class |
| 1436419_a_at | 1700097N02Rik                        | RIKEN cDNA 1700097N02 gene                                                                          | No Class |
| 1453967_at   | 1700093J21Rik                        | RIKEN cDNA 1700093J21 gene                                                                          | No Class |
| 1449832_at   | 1700091H14Rik                        | RIKEN cDNA 1700091H14 gene                                                                          | No Class |
| 1452373_at   | 1700081L11Rik /// LOC100043982       | RIKEN cDNA 1700081L11 gene /// hypothetical protein LOC100043982                                    | No Class |
| 1457062_at   | 1700081L11Rik                        | RIKEN cDNA 1700081L11 gene                                                                          | No Class |
| 1420257_at   | 1700073E17Rik                        | ribosomal protein L7 pseudogene                                                                     | No Class |
| 1432126_at   | 1700072H12Rik                        | RIKEN cDNA 1700072H12 gene                                                                          | No Class |
| 1454124_at   | 1700067K01Rik                        | RIKEN cDNA 1700067K01 gene                                                                          | No Class |
| 1430488_at   | 1700066B19Rik                        | RIKEN cDNA 1700066B19 gene                                                                          | No Class |
| 1432422_at   | 1700063K16Rik                        | RIKEN cDNA 1700063K16 gene                                                                          | No Class |
| 1421495_a_at | 1700052N19Rik                        | RIKEN cDNA 1700052N19 gene                                                                          | No Class |
| 1440171_x_at | 1700049G17Rik                        | RIKEN cDNA 1700049G17 gene                                                                          | No Class |
| 1432345_at   | 1700048F04Rik                        | RIKEN cDNA 1700048F04 gene                                                                          | No Class |
| 1460466_at   | 1700047I17Rik1 /// 1700047I17Rik2    | RIKEN cDNA 1700047I17 gene 1 /// RIKEN cDNA 1700047I17 gene 2                                       | No Class |
| 1453254_at   | 1700034O15Rik                        | RIKEN cDNA 1700034O15 gene                                                                          | No Class |
| 1424447_at   | 1700030K09Rik                        | RIKEN cDNA 1700030K09 gene                                                                          | No Class |
| 1460553_at   | 1700025K23Rik                        | RIKEN cDNA 1700025K23 gene                                                                          | No Class |
| 1430477_s_at | 1700024N20Rik                        | RIKEN cDNA 1700024N20Rik gene                                                                       | No Class |
| 1430006_x_at | 1700024B05Rik /// Gm7995             | RIKEN cDNA 1700024B05 gene /// predicted gene 7995                                                  | No Class |
| 1429868_at   | 1700020N01Rik                        | RIKEN cDNA 1700020N01 gene                                                                          | No Class |
| 1431818_at   | 1700012B15Rik                        | RIKEN cDNA 1700012B15 gene                                                                          | No Class |
| 1440159_at   | 1700010B09Rik                        | RIKEN cDNA 1700010B09 gene                                                                          | No Class |
| 1449284_at   | 1700008P20Rik                        | RIKEN cDNA 1700008P20 gene                                                                          | No Class |
| 1429989_at   | 1700008A04Rik                        | RIKEN cDNA 1700008A04 gene                                                                          | No Class |
| 1428705_at   | 1700007K13Rik                        | RIKEN cDNA 1700007K13 gene                                                                          | No Class |
| 1430169_at   | 1700007K09Rik                        | RIKEN cDNA 1700007K09 gene                                                                          | No Class |
| 1431967_at   | 1700006A11Rik                        | RIKEN cDNA 1700006A11 gene                                                                          | No Class |
| 1455010_at   | 1500012F01Rik                        | RIKEN cDNA 1500012F01 gene                                                                          | No Class |
| 1424192_at   | 1500011H22Rik                        | RIKEN cDNA 1500011H22 gene                                                                          | No Class |
| 1420809_a_at | 1500003O03Rik                        | RIKEN cDNA 1500003O03 gene                                                                          | No Class |
| 1441383_at   | 1500002O10Rik                        | RIKEN cDNA 1500002O10 gene                                                                          | No Class |

|              |                                        |                                                                                                 |          |
|--------------|----------------------------------------|-------------------------------------------------------------------------------------------------|----------|
| 1442992_at   | 130004C03                              | hypothetical LOC403343                                                                          | No Class |
| 1430137_at   | 1300002E11Rik                          | RIKEN cDNA 1300002E11 gene                                                                      | No Class |
| 1435137_s_at | 1200015M12Rik /// A130040M12Rik /// E  | RIKEN cDNA 1200015M12 gene /// RIKEN cDNA A130040M12 gene /// RIKEN cDNA E430024C06 gene        | No Class |
| 1431837_at   | 1200007C13Rik                          | RIKEN cDNA 1200007C13 gene                                                                      | No Class |
| 1427932_s_at | 1200003I10Rik /// 1200015M12Rik /// A1 | RIKEN cDNA 1200003I10 gene /// RIKEN cDNA 1200015M12 gene /// RIKEN cDNA A130040M12 gene /// RI | No Class |
| 1455186_a_at | 1190003J15Rik                          | RIKEN cDNA 1190003J15 gene                                                                      | No Class |
| 1438511_a_at | 1190002H23Rik                          | RIKEN cDNA 1190002H23 gene                                                                      | No Class |
| 1418003_at   | 1190002H23Rik                          | RIKEN cDNA 1190002H23 gene                                                                      | No Class |
| 1441757_at   | 1190002F15Rik                          | RIKEN cDNA 1190002F15 gene                                                                      | No Class |
| 1455545_at   | 1110065P20Rik                          | RIKEN cDNA 1110065P20 gene                                                                      | No Class |
| 1428501_at   | 1110051M20Rik /// LOC100048133         | RIKEN cDNA 1110051M20 gene /// similar to 1110051M20Rik protein                                 | No Class |
| 1430012_at   | 1110050K14Rik                          | RIKEN cDNA 1110050K14 gene                                                                      | No Class |
| 1457779_at   | 1110046J04Rik                          | RIKEN cDNA 1110046J04 gene                                                                      | No Class |
| 1454968_at   | 1110034A24Rik                          | RIKEN cDNA 1110034A24 gene                                                                      | No Class |
| 1417211_a_at | 1110032A03Rik /// LOC100048251         | RIKEN cDNA 1110032A03 gene /// hypothetical protein LOC100048251                                | No Class |
| 1455294_at   | 1110029L17Rik                          | RIKEN cDNA 1110029L17 gene                                                                      | No Class |
| 1431884_at   | 1110019B22Rik                          | RIKEN cDNA 1110019B22 gene                                                                      | No Class |
| 1447982_at   | 1110008P14Rik                          | RIKEN cDNA 1110008P14 gene                                                                      | No Class |
| 1439126_at   | 1110007A13Rik                          | RIKEN cDNA 1110007A13 gene                                                                      | No Class |
| 1454286_at   | 1110004M10Rik                          | RIKEN cDNA 1110004M10 gene                                                                      | No Class |
| 1423335_at   | 1110004F10Rik                          | RIKEN cDNA 1110004F10 gene                                                                      | No Class |
| 1437682_x_at | 1110004E09Rik                          | RIKEN cDNA 1110004E09 gene                                                                      | No Class |
| 1435301_at   | 1110004E09Rik                          | RIKEN cDNA 1110004E09 gene                                                                      | No Class |
| 1430786_at   | 1110002E22Rik                          | RIKEN cDNA 1110002E22 gene                                                                      | No Class |
| 1416830_at   | 0610031J06Rik                          | RIKEN cDNA 0610031J06 gene                                                                      | No Class |
| 1437836_x_at | 0610011L14Rik                          | RIKEN cDNA 0610011L14 gene                                                                      | No Class |
| 1437835_a_at | 0610011L14Rik                          | RIKEN cDNA 0610011L14 gene                                                                      | No Class |
| 1426558_x_at | 0610010B08Rik /// Gm14295 /// LOC6275  | RIKEN cDNA 0610010B08 gene /// predicted gene 14295 /// similar to zinc finger protein 14       | No Class |
| 1417055_at   | 0610009D07Rik                          | RIKEN cDNA 0610009D07 gene                                                                      | No Class |
| 1428545_at   | 0610007L01Rik                          | RIKEN cDNA 0610007L01 gene                                                                      | No Class |
| 1428544_at   | 0610007L01Rik                          | RIKEN cDNA 0610007L01 gene                                                                      | No Class |



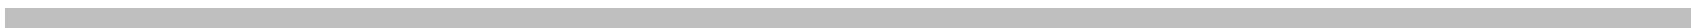
