# Supplementary material for: Identification of Novel Genes Selectively Expressed in the Follicle-Associated Epithelium from the Meta-Analysis of Transcriptomics Data from Multiple Mouse Cell and Tissue Populations
Source: PubMed Central journal article supplement — DNA Res. 2012 Sep 18;19(5):407–22. doi: 10.1093/dnares/dss022 (PMC3473373; doi:10.1093/dnares/dss022), 2012-09-18
Supplement: supp_dss022_dss022supp_table4.pdf [file supp_dss022_dss022supp_table4.pdf]

**Supplementary Table S4.** Statistically over-represented TFBS motifs identified within the promoter regions of the genes within cluster 65.

| <b>Motif<sup>a</sup></b> | <b>Family</b>     | <b>Raw score<sup>b</sup></b> | <b>P value<sup>c</sup></b> | <b>Promoters containing TFBS motif</b>                                    |
|--------------------------|-------------------|------------------------------|----------------------------|---------------------------------------------------------------------------|
| Broad-complex 1          | Zinc finger, C2H2 | 15.4                         | 0.003                      | <i>Ascl2, Ccl20, Cftr, Es31, Fgf15, Fgfr4, Gm4738, Kcnj15, Mycl1, Ubd</i> |
| NFYA                     | CAAT-box          | 10.2                         | 0.001                      | <i>Ascl2, Calcb, Cftr, Es31, Gp2, Gm4738, Rps6kl1</i>                     |
| REL                      | NF-κB             | 7.74                         | 0.001                      | <i>Ccl20, Cftr, Clca2, Fgfr4, Gpr133, Kcna1, Psg18, Rps6kl1, Ubd</i>      |
| DI 2                     | REL               | 7.43                         | 0.002                      | <i>Ccl20, Cftr, Clca2, Fgfr4, Kcna1, Kcnj15, Psg18, Ubd</i>               |
| NF-κB                    | NF-κB             | 6.87                         | 0.001                      | <i>Ccl20, Clca2, Fgfr4, Gpr133, Kcna1, Psg18, Ubd</i>                     |
| NHLH1                    | bHLH              | 6.3                          | 0.001                      | <i>Gpr133, Gm4738, Gulo, Ubd</i>                                          |
| RELA                     | NF-κB             | 5.99                         | 0.001                      | <i>Ccl20, Clca2, Fgfr4, Kcna1, Psg18, Ubd</i>                             |
| HNF1α                    | Homeobox          | 3.87                         | 0.002                      | <i>Es31, Gm4738, Kcnj15</i>                                               |
| TBP                      | TATA-box          | 3.63                         | 0.008                      | <i>Anxa10, Calcb, Ccl20, Fgf15, Gp2, Gpr133, Gm4738, Mycl1</i>            |
| Sox17                    | HMG               | 3.28                         | 0.002                      | <i>Ascl2, Kcnj15, Mycl1, Psg18</i>                                        |
| Sox9                     | HMG               | 1.66                         | 0.01                       | <i>Ascl2, Ccl20, Kcnj15, Mycl1, Psg18</i>                                 |

<sup>a</sup>, Data are presented in order of clover score, with the highest score (most thermodynamically stable pairing) first.

<sup>b</sup>, Quantifies the degree of over-representation of motifs when compared to the background set of all mouse promoters.

<sup>c</sup>, Probability of obtaining the raw score by chance. Values calculated by randomly sampling the background set of all mouse promoters.
