# Supplementary material for: Identification of Novel Genes Selectively Expressed in the Follicle-Associated Epithelium from the Meta-Analysis of Transcriptomics Data from Multiple Mouse Cell and Tissue Populations
Source: PubMed Central journal article supplement — DNA Res. 2012 Sep 18;19(5):407–22. doi: 10.1093/dnares/dss022 (PMC3473373; doi:10.1093/dnares/dss022), 2012-09-18
Supplement: supp_dss022_dss022supp_table5.pdf [file supp_dss022_dss022supp_table5.pdf]

**Supplementary Table S5.** FAE- and M-cell-related genes significantly induced > 2.0 fold in the intestinal epithelium in response to RANKL-stimulation. The putative functions of the genes listed in this table are presented in Figure 8.

| Gene symbol <sup>a</sup>    | Gene title                                                          | Fold change in intestinal epithelium after RANKL-treatment <sup>b</sup> | <i>P</i> value <sup>c</sup> | Day of peak expression level | Reported expression by FAE and/or M cells | Fold change in <i>in vitro</i> small intestinal organoids after RANKL-treatment <sup>d</sup> | Ref.                         |
|-----------------------------|---------------------------------------------------------------------|-------------------------------------------------------------------------|-----------------------------|------------------------------|-------------------------------------------|----------------------------------------------------------------------------------------------|------------------------------|
| <i>Gp2</i>                  | glycoprotein 2 (zymogen granule membrane)                           | 46.9                                                                    | 0.02                        | 3                            | M cells                                   | 56.5                                                                                         | <sup>1</sup> , current study |
| <i>SpiB</i>                 | Spi-B transcription factor (Spi-1/PU.1 related)                     | 31.9                                                                    | 0.0005                      | 2                            | M cells                                   | 18.5                                                                                         | <sup>2</sup>                 |
| <i>Anxa5</i>                | Annexin A5                                                          | 12.7                                                                    | 9x10 <sup>-5</sup>          | 2                            | M cells                                   | 35.6                                                                                         | <sup>3</sup>                 |
| <i>Ccl20</i>                | chemokine (C-C motif) ligand 20                                     | 11.3                                                                    | 0.0002                      | 2                            | FAE                                       | 158.5                                                                                        | <sup>4</sup> , current study |
| <i>Tnfaip2</i>              | tumor necrosis factor, alpha-induced protein 2 (M-Sec)              | 7.7                                                                     | 0.004                       | 2                            | M cells                                   | 13.9                                                                                         | <sup>5</sup>                 |
| <i>Fabp5</i>                | fatty acid binding protein 5, epidermal                             | 7.4                                                                     | 0.008                       | 2                            |                                           |                                                                                              |                              |
| <i>Ctsh</i>                 | Cathepsin H                                                         | 6.9                                                                     | 0.002                       | 2                            | FAE                                       | 8.2                                                                                          | <sup>3</sup>                 |
| <i>Serpina1a/ Serpina1b</i> | serine (or cysteine) peptidase inhibitor, clade A, members 1A or 1B | 5.6                                                                     | 1x10 <sup>-5</sup>          | 2                            |                                           |                                                                                              |                              |
| <i>Clu</i>                  | Clusterin                                                           | 5.3                                                                     | 0.001                       | 2                            | FAE and M cells                           | 10.9                                                                                         | <sup>3</sup>                 |
| <i>9930023K05Rik</i>        | RIKEN cDNA 9930023K05 gene                                          | 5.1                                                                     | 0.002                       | 2                            |                                           | 51.7                                                                                         |                              |
| <i>Clca2</i>                | chloride channel calcium activated 2                                | 5.0                                                                     | 3x10 <sup>-5</sup>          | 2                            | Cluster 65:M cell- and FAE-related        | 3.1                                                                                          | current study                |
| <i>Ccl9</i>                 | chemokine (C-C motif) ligand 9                                      | 4.9                                                                     | 4x10 <sup>-6</sup>          | 2                            | M cells                                   | 32.0                                                                                         | <sup>6</sup>                 |
| <i>Mfge8</i>                | milk fat globule-EGF factor 8 protein                               | 4.9                                                                     | 0.004                       | 3                            |                                           | 5.0                                                                                          |                              |
| <i>Ncf4</i>                 | Neutrophil cytosolic factor 4                                       | 4.9                                                                     | 0.006                       | 1                            |                                           | 52.8                                                                                         |                              |
| <i>Akt3</i>                 | Thymoma viral                                                       | 4.8                                                                     | 0.0005                      | 2                            |                                           |                                                                                              |                              |

|                 |                                                                     |     |                      |   |                 |      |                              |
|-----------------|---------------------------------------------------------------------|-----|----------------------|---|-----------------|------|------------------------------|
|                 | proto-oncogene 3                                                    |     |                      |   |                 |      |                              |
| <i>Rac2</i>     | RAS-related C3 botulinum substrate 2                                | 4.6 | 0.001                | 2 |                 | 23.5 |                              |
| <i>Cd44</i>     | CD44 antigen                                                        | 4.1 | 0.006                | 1 |                 | 2.2  |                              |
| <i>Prnp</i>     | Prion protein                                                       | 3.7 | 0.0002               | 2 | M cells         | 52.4 | <sup>7</sup>                 |
| <i>Slc2a6</i>   | solute carrier family 2 (facilitated glucose transporter), member 6 | 3.7 | 0.0002               | 1 |                 | 35.6 |                              |
| <i>Icam1</i>    | Intercellular adhesion molecule 1                                   | 3.6 | 0.0001               | 1 | M cells         | 87.7 | <sup>8</sup>                 |
| <i>Marcks11</i> | MARCKS-like 1                                                       | 3.6 | 0.0002               | 1 | M cells         | 5.8  | <sup>9</sup>                 |
| <i>Rnase1</i>   | Ribonuclease, RNase A family, 1 (pancreatic)                        | 3.6 | 0.002                | 2 |                 | 2.2  |                              |
| <i>Tmem176a</i> | Transmembrane protein 176A                                          | 3.4 | 0.006                | 1 |                 | n/a  |                              |
| <i>Tmem176b</i> | Transmembrane protein 176B                                          | 3.4 | 0.005                | 1 |                 | n/a  |                              |
| <i>Ubd</i>      | Ubiquitin D                                                         | 3.1 | 0.02                 | 2 | FAE and M cells | 31.2 | <sup>6</sup> , current study |
| <i>Eno3</i>     | Enolase 3,beta muscle                                               | 3.0 | 0.008                | 2 |                 | 24.0 |                              |
| <i>Slco3a1</i>  | solute carrier organic anion transporter family, member 3a1         | 3.0 | 0.0001               | 3 |                 | 3.3  |                              |
| <i>Tr</i>       | Transthyretin                                                       | 2.9 | 0.008                | 3 |                 |      |                              |
| <i>Cxcl11</i>   | chemokine (C-X-C motif) ligand 11                                   | 2.8 | 0.003                | 1 | FAE and M cells |      | current study                |
| <i>Mreg</i>     | Melanoregulin                                                       | 2.8 | 0.004                | 2 |                 |      |                              |
| <i>Fyb</i>      | FYN binding protein                                                 | 2.7 | 0.002                | 2 |                 |      |                              |
| <i>Kctd12</i>   | potassium channel tetramerisation domain containing 12              | 2.6 | 0.0001               | 1 |                 | 9.2  |                              |
| <i>Scg5</i>     | Secretogranin V (Sgpe-1)                                            | 2.6 | 0.0001               | 2 | M cells         |      | <sup>6</sup>                 |
| <i>Cyba</i>     | cytochrome b-245, alpha polypeptide                                 | 2.5 | 0.0008               | 1 |                 | 2.7  |                              |
| <i>Blnk</i>     | B-cell linker                                                       | 2.4 | 0.0002               | 3 |                 | 2.3  |                              |
| <i>Far2</i>     | fatty acyl CoA reductase 2                                          | 2.4 | 0.003                | 1 |                 | n/a  |                              |
| <i>Rab32</i>    | RAB32, member RAS oncogene family                                   | 2.4 | 0.01                 | 2 |                 | 16.2 |                              |
| <i>Tmem184c</i> | Transmembrane protein 184C                                          | 2.4 | 4.3x10 <sup>-5</sup> | 3 |                 | n/a  |                              |
| <i>Clca4</i>    | Chloride channel                                                    | 2.3 | 0.0002               | 1 |                 |      |                              |

|                 |                                                                 |     |        |   |                                              |      |                  |
|-----------------|-----------------------------------------------------------------|-----|--------|---|----------------------------------------------|------|------------------|
|                 | calcium activated<br>4                                          |     |        |   |                                              |      |                  |
| <i>Epb4.1l2</i> | Erythrocyte<br>protein band 4.1-<br>like 2                      | 2.3 | 0.01   | 1 |                                              | 2.1  |                  |
| <i>S100a11</i>  | S100 calcium<br>binding protein<br>A11 (calgizzarin)            | 2.3 | 0.0003 | 1 |                                              | 2.9  |                  |
| <i>Stk39</i>    | Serine/threonine<br>kinase 39,<br>STE20/SPS1<br>homolog (yeast) | 2.3 | 0.0009 | 3 |                                              |      |                  |
| <i>Tmprss2</i>  | Transmembrane<br>protease, serine 2                             | 2.3 | 0.0002 | 3 |                                              |      |                  |
| <i>Gca</i>      | Grancalcin                                                      | 2.2 | 0.001  | 2 |                                              |      |                  |
| <i>Gjb2</i>     | Gap junction<br>protein, beta 2                                 | 2.2 | 0.001  | 2 | Cluster<br>65:M cell-<br>and FAE-<br>related | 16.2 | current<br>study |
| <i>Pdia5</i>    | Protein disulfide<br>isomerise<br>associated 5                  | 2.2 | 0.007  | 3 |                                              |      |                  |
| <i>Myo1b</i>    | Myosin 1B                                                       | 2.2 | 0.005  | 3 |                                              | 2.8  |                  |
| <i>Reep1</i>    | Receptor<br>accessory protein<br>1                              | 2.2 | 0.002  | 1 |                                              |      |                  |

<sup>a</sup>, Data are presented in order of peak expression fold-change, with the highest score first. These data were performed on Affymetrix mouse gene 1.0 ST expression arrays (GSE37861).

<sup>b</sup>, Fold-change in gene expression level at peak day when compared to controls (d 0).

<sup>c</sup>, *P* values for those genes which were significantly upregulated > 2.0 fold on peak day after RANKL-treatments when compared to controls (*n* = 3/group).

<sup>d</sup>, Fold-change in gene expression in RANKL-stimulated small intestinal organoid cultures when compared to controls. These data were performed on Agilent 4x44K whole mouse genome expression arrays (GSE38785) and equivalent gene probe sets were compared. n/a; an equivalent annotated probe set was not present on the array.

## References

1. Hase, K., Kawano, K., Nochi, T., et al. 2009, Uptake through glycoprotein 2 of FimH<sup>+</sup> bacteria by M cells initiates mucosal immune responses. *Nature*, **462**, 226-231.
2. Kanaya, T., Hase, K., Takahashi, D., et al. 2012, The Ets transcription factor Spi-B is essential for the differentiation of intestinal microfold cells. *Nat. Immunol.*, **in press**.
3. Verbrugghe, P., Waelput, W., Dieriks, B., Waeytens, A., Vandesompele, J. and Cuvelier, C. A. 2006, Murine M cells express annexin V specifically. *J. Pathol.*, **209**, 240-249.
4. Ebisawa, M., Hase, K., Takahashi, D., et al. 2011, CCR6<sup>hi</sup>CD11c<sup>int</sup> B cells promote M-cell differentiation in Peyer's patch. *Int. Immunol.*, **23**, 261-269.
5. Hase, K., Kimura, S., Takatsu, H., et al. 2009, M-Sec promotes membrane nanotube formation by interacting with Ral and the exocyst complex. *Nature Cell. Biol.*, **11**, 1427-1432.
6. Hase, K., Ohshima, D., Kawano, K., et al. 2005, Distinct gene expression profiles characterize cellular phenotypes of follicle-associated epithelium and M cells. *DNA Res.*, **12**, 127-137.
7. Nakato, G., Fukuda, S., Hase, K., Goitsuka, R., Cooper, M. D. and Ohno, H. 2009, New approach for M-cell-specific molecules by screening comprehensive transcriptome analysis. *DNA Res.*, **16**, 227-235.
8. Ueki, T., Mizuno, M., Uesu, T., Kiso, T. and Tsuji, S. 1995, Expression of ICAM-1 on M cells covering isolated lymphoid follicles of the human colon. *Acta Med. Okayama*, **49**, 145-151.
9. Terahara, K., Yoshida, M., Igarashi, O., et al. 2008, Comprehensive gene expression profiling of Peyer's patch M cells, villous M-like cells, and intestinal epithelial cells. *J. Immunol.*, **180**, 7840-7846.
